# Supplementary material for: Long-term intravital imaging of the multicolor-coded tumor microenvironment during combination immunotherapy
Source: eLife. 2016 Nov 18;5:e14756. doi: 10.7554/eLife.14756 (PMC5173323; doi:10.7554/eLife.14756)
Supplement: Figure 3—source data 1. — Data listed in the excel files are displacements. Displacement is a function of time. Each column in the excel files lists displacements corresponding to one time. The time values are 0.5 min, 1 min, 1.5 min, and so on, in turn. DOI: http://dx.doi.org/10.7554/eLife.14756.016 [file elife-14756-fig3-data1.xls]

## Sheet: displacement(um)
0	0	0	0	0	0	0	0	0	0	0.146117	0.136092	0	0.179755	0	0.28451	0.246094	0.431189	0.226117	0.466309	0.775313	1.09275	0.246094	1.41635	1.36815	1.32473	1.21974	1.52397	2.0294	2.75141
0	0	0	0.0098499	0	0.0150525	0	0	0	0.106809	0.157138	0.141883	0.161697	0.183393	0.136092	0.299622	0.340341	0.439861	0.488238	0.555049	1.49693	1.1671	0.972132	1.71579	2.05801	1.94129	2.20975	2.75576	2.96336	3.89108
0	0	0	0.023666	0	0.0338763	0	0	0	0.120659	0.159013	0.176792	0.173152	0.187518	0.243365	0.341373	0.348029	0.48856	0.549906	0.645996	1.61165	1.79159	1.26748	1.77461	2.4648	2.72077	3.2668	2.88045	3.49765	8.95795
0	0	0	0.0241078	0	0.0433073	0.0175837	0	0.0624886	0.127066	0.162451	0.202838	0.176792	0.205652	0.271874	0.348029	0.348029	0.508001	0.559863	0.693006	1.78169	1.92205	2.16546	2.13981	2.8969	3.44093	3.45409	3.89108	4.90338	10.4409
0	0	0	0.0306315	0	0.0500305	0.0213212	0.0267643	0.0740988	0.150798	0.176521	0.241748	0.189208	0.217964	0.277005	0.355989	0.371265	0.513229	0.612102	1.42789	1.79159	2.01982	2.61976	2.58123	3.2457	3.76451	3.54921	4.00612	7.95153	11.1424
0	0	0	0.0322338	0	0.0531098	0.030335	0.0634537	0.0870998	0.162929	0.196469	0.246094	0.198305	0.224249	0.297616	0.35912	0.395236	0.531458	0.671143	1.46001	1.90395	2.4635	2.66834	2.65167	3.61473	3.89108	4.17635	5.6118	8.87304	13.3495
0	0	0	0.0349741	0.0201696	0.0783185	0.0390421	0.0875513	0.121472	0.173598	0.213465	0.246094	0.213932	0.246094	0.319058	0.381653	0.430176	0.565436	0.723	1.49693	2.37076	2.6256	2.76737	3.06874	3.69141	4.00612	4.51768	6.83769	9.1819	18.498
0	0	0	0.0363107	0.0311581	0.0828723	0.0525727	0.12537	0.136006	0.174331	0.23583	0.254381	0.219983	0.256592	0.326233	0.398567	0.434409	0.58299	0.738121	1.50517	2.54702	2.63708	2.81252	3.44939	3.94518	4.35384	5.76616	7.44215	9.39679	22.888
0	0	0	0.0405011	0.0429504	0.0865965	0.0687868	0.127399	0.145869	0.181214	0.246094	0.275364	0.246094	0.29715	0.33294	0.416177	0.450663	0.583478	0.760511	1.59288	2.68817	2.68964	2.90305	3.91061	3.97577	4.42564	5.77698	7.65664	11.569	23.0578
0	0	0	0.0522833	0.0491624	0.0867174	0.0727245	0.134425	0.149971	0.184892	0.246094	0.277306	0.264119	0.316946	0.333252	0.418715	0.46507	0.594749	0.768753	1.74015	2.7538	2.85865	3.17153	3.96814	4.17635	4.73371	5.84958	7.92483	11.9184	23.5411
0	0	0	0.0526563	0.061455	0.0977092	0.0860505	0.13655	0.1605	0.196854	0.246094	0.279856	0.288862	0.320773	0.347125	0.419837	0.493847	0.614594	0.786633	1.74015	2.87615	2.92899	3.2833	4.07358	4.19083	5.41965	6.27418	8.72853	12.0987	28.3275
0	0	0.00896217	0.0539628	0.0629294	0.100998	0.0864924	0.136783	0.176792	0.203317	0.252861	0.281205	0.294767	0.348029	0.348029	0.43019	0.500495	0.626445	0.85365	2.01004	3.01561	3.20867	3.95272	4.20652	4.62368	5.53027	6.89502	10.1752	12.5628	32.0457
0	0	0.0181481	0.0583206	0.0656772	0.110277	0.0871885	0.138098	0.189964	0.207826	0.256319	0.281691	0.312223	0.348029	0.369353	0.492188	0.519106	0.646013	0.865245	2.09068	3.14182	3.22589	4.00612	4.35384	4.95254	5.9165	7.81711	10.5333	17.8566	34.975
0	0.00642324	0.027272	0.0592162	0.0690718	0.112097	0.0872681	0.139309	0.198121	0.21213	0.256592	0.283189	0.320773	0.348029	0.371511	0.499503	0.521752	0.70717	0.91689	2.15002	3.34724	3.24941	4.00612	4.53774	5.21463	6.08802	8.45552	10.6058	19.7013	36.0214
0	0.0109456	0.0286073	0.0678756	0.0695024	0.126435	0.088923	0.154055	0.202091	0.220783	0.260044	0.285906	0.332276	0.3561	0.385069	0.502189	0.550282	0.719928	0.921916	2.24026	3.46177	4.05868	4.18359	5.01935	5.41541	6.78837	8.72853	11.1215	21.3138	36.7084
0	0.0164736	0.0311214	0.0797607	0.0711739	0.12726	0.0939115	0.166381	0.206619	0.220808	0.262224	0.289973	0.347125	0.360176	0.39075	0.507968	0.550282	0.721692	0.963804	2.30356	3.69141	4.18186	4.43652	5.07335	5.83403	6.84211	8.81139	11.7139	21.8729	37.9056
0	0.0195861	0.0319263	0.0806805	0.0714335	0.1278	0.106248	0.170793	0.207825	0.229035	0.284764	0.293339	0.355989	0.379048	0.420438	0.509755	0.589158	0.737807	0.984375	2.33465	3.69141	4.23396	4.53774	5.17382	5.92672	7.51292	9.23054	12.4952	22.2003	38.1445
0	0.0234336	0.0321501	0.0810984	0.0875513	0.130913	0.106755	0.171599	0.211518	0.229175	0.285906	0.299731	0.363394	0.385069	0.428083	0.518531	0.616698	0.762489	0.990206	2.46242	3.75646	4.30488	4.85757	5.40286	6.32705	7.81711	9.8087	12.8347	22.7873	43.084
0	0.0265963	0.0342826	0.0820734	0.10298	0.131057	0.106809	0.175725	0.214606	0.242506	0.30217	0.307902	0.363661	0.398926	0.461255	0.544727	0.617166	0.787552	1.08402	2.48712	3.89108	4.42969	4.98302	5.6118	6.71705	8.39699	10.2638	17.6176	23.1655	46.1538
0	0.0279536	0.0357252	0.0854957	0.106782	0.131365	0.117528	0.176195	0.217103	0.243734	0.307064	0.310505	0.364241	0.40284	0.492188	0.549906	0.633366	0.787642	1.25484	2.50487	3.96814	4.45695	5.21463	5.92672	6.84211	8.42412	10.9126	19.0274	23.7639	47.2658
0	0.030871	0.0362059	0.0855155	0.107064	0.141653	0.119684	0.178776	0.21877	0.246094	0.316218	0.315084	0.364938	0.410534	0.509755	0.552905	0.649233	0.843428	1.25484	2.51543	4.11593	4.68225	5.46417	5.94712	7.49294	8.56038	11.3115	19.9397	26.8253	48.9875
0	0.0311163	0.0390262	0.0861572	0.109236	0.144892	0.120243	0.187746	0.221363	0.246094	0.326593	0.318216	0.372393	0.412551	0.525182	0.572737	0.655547	0.885011	1.30394	2.52938	4.12528	4.72731	5.56847	6.09001	7.56241	8.9538	11.4797	20.1812	28.5734	53.583
0	0.0311484	0.0453434	0.0897498	0.109962	0.145221	0.133938	0.189964	0.224169	0.275376	0.328419	0.31956	0.388747	0.415742	0.536888	0.588329	0.662628	0.900378	1.31692	2.61601	4.19361	4.75481	5.79236	6.2306	7.56475	9.1806	12.8559	20.6264	30.9458	58.7009
0	0.0312629	0.0497458	0.0948432	0.110375	0.148732	0.142553	0.194104	0.224676	0.278072	0.33007	0.322499	0.392134	0.420563	0.542495	0.614594	0.690533	0.910891	1.35462	2.73662	4.28034	4.83498	5.83403	6.55275	7.59709	9.80059	13.7571	21.1322	31.485	58.767
0	0.0362228	0.0502961	0.0960587	0.119767	0.149635	0.149564	0.207323	0.225955	0.281372	0.33116	0.325979	0.393719	0.428395	0.547306	0.619082	0.691212	0.963804	1.39581	2.75141	4.43652	4.98302	5.94712	6.67478	7.81862	9.85783	17.2072	21.3705	33.7641	69.1804
0	0.0388368	0.0509066	0.0962224	0.124667	0.149891	0.152121	0.213199	0.237108	0.288168	0.332946	0.331077	0.39682	0.445494	0.56966	0.622086	0.691563	0.98721	1.40997	2.83586	4.49079	5.01935	6.00005	6.96591	8.06121	10.904	18.7322	21.6335	34.6503	80.2922
0	0.0393462	0.0525527	0.10038	0.130186	0.150134	0.154967	0.213343	0.238706	0.304472	0.345642	0.341917	0.405524	0.467675	0.571828	0.651782	0.700883	1.00448	1.42238	2.91771	4.51768	5.37527	6.05284	7.00395	8.55083	11.7122	19.1969	22.9655	35.5267	95.5146
0	0.039922	0.0548132	0.101365	0.138259	0.155595	0.155922	0.216243	0.24155	0.30949	0.348029	0.348029	0.409689	0.467938	0.575123	0.662628	0.738121	1.00778	1.43496	2.9291	4.55075	5.48224	6.172	7.15763	8.59569	12.4247	19.2536	23.2201	35.9886
0	0.0400827	0.0553182	0.103485	0.139302	0.165891	0.160706	0.223847	0.245377	0.312223	0.348029	0.348029	0.410534	0.476047	0.590037	0.674239	0.778217	1.01467	1.45277	2.93627	4.68225	5.50282	6.21113	7.31925	9.13933	12.7708	19.4803	23.4022	36.055
0	0.0403387	0.0563979	0.106296	0.140878	0.170566	0.161963	0.225339	0.245505	0.320773	0.348029	0.357412	0.412819	0.478256	0.591991	0.699639	0.778217	1.01467	1.52144	3.03735	4.97694	5.61994	6.25484	7.41963	10.259	15.4961	19.7979	23.8835	36.1448
0	0.0413503	0.0662908	0.111526	0.141097	0.176135	0.16354	0.228621	0.246094	0.322211	0.348029	0.359464	0.41325	0.483021	0.611492	0.702718	0.783581	1.01918	1.55659	3.11287	5.02581	5.68152	6.27418	7.42672	10.4112	16.8875	20.1812	25.145	36.297
0	0.0425829	0.0666556	0.111902	0.145651	0.176481	0.164408	0.23067	0.246094	0.324133	0.348828	0.362996	0.414368	0.48447	0.617907	0.722259	0.829111	1.06783	1.57261	3.41884	5.19176	5.7217	6.32705	7.86346	11.1505	18.2641	20.4791	27.0714	36.9141
0	0.0461846	0.070255	0.113596	0.148612	0.180645	0.164907	0.231117	0.246094	0.327278	0.352797	0.366984	0.416054	0.490691	0.620655	0.73201	0.84055	1.0994	1.61414	3.49765	5.22044	5.79236	6.43394	8.58676	11.6395	18.4291	20.4891	28.8445	36.9673
0	0.0475875	0.0704499	0.115059	0.15036	0.183859	0.168529	0.232582	0.246094	0.327758	0.358601	0.392025	0.416511	0.496155	0.622029	0.738281	0.843428	1.10056	1.6186	3.5766	5.27949	5.91137	6.83479	8.9515	12.2943	18.5095	20.9302	30.1073	37.4071
0	0.0483699	0.0704711	0.118671	0.153473	0.185145	0.170572	0.233625	0.246094	0.332946	0.359279	0.402432	0.420635	0.500495	0.631906	0.738281	0.847499	1.10215	1.65859	3.65845	5.31243	5.94712	7.09489	9.50235	14.5529	18.8016	21.8224	30.4703	41.854
0	0.0493013	0.0706684	0.120292	0.153656	0.188517	0.172553	0.235746	0.256328	0.334159	0.362496	0.407465	0.425249	0.505131	0.63473	0.757373	0.871173	1.12458	1.73151	3.7091	5.6655	6.17867	7.14096	10.0417	17.0517	18.9124	23.2631	30.8517	42.3288
0.0103301	0.0496648	0.070942	0.121138	0.15392	0.189237	0.174849	0.237174	0.256933	0.347125	0.36942	0.407564	0.428395	0.507968	0.642176	0.7663	0.874052	1.13317	1.75543	3.90722	5.68152	6.64453	7.55313	10.8433	17.5349	19.1416	23.3505	32.3085	45.1664
0.0109512	0.0508534	0.0722373	0.122875	0.157231	0.193199	0.176192	0.243293	0.257808	0.348029	0.37115	0.413886	0.434574	0.524077	0.646013	0.776103	0.878984	1.15066	1.79779	3.94518	5.68152	6.65722	7.55847	11.5218	17.5574	19.3853	23.4628	32.3798	45.5593
0.0115854	0.0524211	0.0726583	0.12317	0.159885	0.196536	0.179211	0.243293	0.271041	0.348029	0.376327	0.415742	0.438117	0.534343	0.654457	0.778217	0.887304	1.18231	1.86922	4.19083	6.02254	6.7575	9.26097	12.6217	17.6811	19.4554	23.4836	33.9038	45.7843
0.0120385	0.0545448	0.0730714	0.126249	0.161803	0.197401	0.180645	0.245781	0.275429	0.348029	0.37991	0.420415	0.441379	0.538414	0.668077	0.780187	0.887304	1.1866	1.87419	4.20525	6.40317	6.93006	9.37097	13.0151	17.8346	19.4554	23.5232	34.1803	46.6118
0.0146472	0.0553537	0.0745165	0.127288	0.163517	0.199091	0.18418	0.246094	0.276242	0.348172	0.389356	0.426194	0.443315	0.542821	0.673848	0.786083	0.900194	1.23047	1.88281	4.29784	6.40668	7.17826	9.53394	14.0295	17.8499	20.3175	23.7408	35.0465	47.006
0.0150299	0.0562915	0.075003	0.128834	0.164028	0.201013	0.187816	0.246094	0.277692	0.348995	0.392025	0.428188	0.446307	0.547086	0.675785	0.83456	0.905564	1.24142	1.92205	4.44534	6.49706	7.33202	11.1682	15.3548	17.9159	20.9033	25.3906	35.2249	47.4374
0.0157577	0.0576701	0.0769185	0.130338	0.16632	0.201939	0.189964	0.246094	0.278072	0.349191	0.394775	0.428395	0.453414	0.551104	0.687655	0.842072	0.914046	1.24366	1.95618	4.45695	6.64909	7.93628	12.0183	16.5085	18.1126	21.1307	27.3175	35.3254	51.3667
0.0160174	0.0587876	0.078637	0.130767	0.166824	0.205343	0.190404	0.246094	0.2783	0.351644	0.396581	0.43163	0.459771	0.5611	0.690533	0.842721	0.916282	1.25484	1.98477	4.68225	6.93006	8.14195	12.2599	16.7416	18.457	22.1323	28.1624	35.6836	51.9839
0.0162021	0.0599146	0.0809602	0.133026	0.167642	0.205565	0.190652	0.246094	0.279381	0.354038	0.396747	0.432376	0.470171	0.569022	0.696058	0.85129	0.918433	1.25484	2.00372	4.70161	7.24907	9.40323	12.3268	16.7994	18.6008	22.1348	29.5156	35.6878	55.8363
0.0211154	0.0614802	0.0828065	0.133883	0.169846	0.207825	0.193099	0.246094	0.281222	0.356915	0.397323	0.433876	0.474134	0.571828	0.700114	0.859931	0.933372	1.27208	2.03467	4.71215	7.37213	9.86099	12.6541	16.909	18.6318	23.3841	29.7252	35.7777	55.9757
0.0219855	0.0631174	0.0850087	0.13551	0.171022	0.208466	0.196741	0.246094	0.289573	0.359279	0.399274	0.434574	0.478256	0.575123	0.702048	0.869426	0.944398	1.27361	2.09243	4.94642	7.63287	9.98128	12.6685	16.9519	18.7047	23.4685	29.8948	36.0945	58.293
0.0254481	0.0644795	0.0859125	0.13563	0.171306	0.209019	0.203317	0.246094	0.289627	0.363822	0.401114	0.435898	0.481777	0.580863	0.719299	0.874052	0.969333	1.32526	2.09924	5.13859	7.72358	10.556	12.8873	17.0676	19.0782	23.5717	30.0849	36.1188	59.1905
0.0265031	0.0647938	0.0904851	0.136364	0.172597	0.210021	0.207339	0.246094	0.291117	0.365406	0.404202	0.436267	0.486221	0.580991	0.73201	0.875811	0.979603	1.34317	2.15881	5.19135	7.81439	10.8803	14.5383	17.2792	20.5267	23.5844	30.1968	36.1766	64.4145
0.0268592	0.0677863	0.0908647	0.136522	0.173573	0.210329	0.212078	0.246094	0.292866	0.365722	0.406187	0.437107	0.492188	0.603385	0.738281	0.885566	0.984375	1.34548	2.2036	5.32382	8.46787	11.4162	15.4961	17.5712	20.7587	23.5967	31.1028	36.1766	68.2217
0.0281046	0.0682572	0.0959842	0.137447	0.175264	0.216566	0.217858	0.249132	0.293873	0.371147	0.413886	0.437897	0.492188	0.603977	0.738281	0.887304	0.989919	1.34766	2.24288	5.41406	8.61328	11.4299	15.7385	17.7682	21.3819	23.6484	31.5394	36.5165	77.7485
0.0291507	0.0692108	0.0965185	0.138777	0.176563	0.216853	0.218862	0.2511	0.293927	0.37167	0.416511	0.441379	0.496706	0.60532	0.740301	0.887304	0.99011	1.36658	2.32782	5.41512	9.17235	11.8355	15.7692	17.9665	21.4536	23.7286	32.5606	40.3781	79.3422
0.0298203	0.0704732	0.0965717	0.140142	0.180048	0.217363	0.218898	0.252405	0.294098	0.372393	0.420563	0.443817	0.51292	0.605619	0.7408	0.891789	0.992593	1.39104	2.34301	5.42455	9.40324	11.879	16.272	18.0573	21.9616	25.6127	33.1085	41.0984	89.4181
0.031753	0.0717148	0.0965781	0.141698	0.181603	0.217769	0.219527	0.259346	0.297053	0.373713	0.422598	0.444152	0.531804	0.607513	0.752545	0.894959	1.00069	1.39806	2.46094	5.6118	10.0928	12.3661	16.2739	18.2641	22.3783	26.5963	33.8475	41.3701	98.2157
0.0322021	0.0731896	0.0967145	0.143793	0.182934	0.218547	0.219981	0.259778	0.298038	0.374003	0.423701	0.446445	0.536057	0.616406	0.754683	0.902827	1.03045	1.40047	2.48989	5.9254	10.1046	13.0557	16.3407	18.2922	22.4428	26.8005	34.0687	43.0488
0.032941	0.0744519	0.0990783	0.14544	0.184241	0.219936	0.220429	0.259851	0.298207	0.375997	0.424749	0.455502	0.538414	0.617662	0.75792	0.910213	1.03902	1.40572	2.53437	5.95221	10.1293	14.0468	16.3833	18.534	23.0056	27.8521	34.2204	43.9462
0.0329968	0.0746391	0.0991688	0.1456	0.186152	0.220975	0.221825	0.259898	0.304971	0.378791	0.432376	0.456803	0.5457	0.617907	0.762779	0.918433	1.04409	1.40888	2.56929	6.22573	10.5849	14.2246	16.4515	20.5145	23.2887	29.1203	34.6503	44.1462
0.0345781	0.0765682	0.0996064	0.146168	0.186171	0.221519	0.226222	0.262226	0.307329	0.379077	0.43259	0.458089	0.550282	0.625112	0.766235	0.922197	1.04409	1.43496	2.57336	6.40317	11.1043	14.5944	16.8821	20.859	23.4468	29.2165	34.7001	44.1853
0.0363213	0.0771759	0.0998081	0.14645	0.186689	0.221777	0.230959	0.265284	0.308222	0.381451	0.434574	0.460044	0.550282	0.627705	0.767226	0.925669	1.06098	1.45056	2.57484	6.45622	11.3444	14.9146	16.9358	20.9748	23.7149	29.2345	34.9462	45.506
0.0371402	0.0776645	0.100708	0.146685	0.187558	0.221793	0.232004	0.267513	0.30841	0.38634	0.435284	0.47083	0.550282	0.633366	0.780187	0.928343	1.0736	1.47656	2.57585	6.62059	11.5964	14.9936	17.7205	21.3691	23.7187	29.2631	34.9462	45.6268
0.0383956	0.080859	0.101937	0.147861	0.18885	0.223506	0.233336	0.267555	0.308828	0.386721	0.436081	0.472228	0.550282	0.639459	0.780477	0.929777	1.07467	1.47955	2.65051	7.10269	11.6909	15.1802	17.8702	21.6227	23.7343	29.3502	34.9462	45.9029
0.0385394	0.0810557	0.102553	0.148711	0.189633	0.223772	0.238706	0.268737	0.311178	0.387243	0.437805	0.474134	0.551291	0.640134	0.789235	0.943384	1.09591	1.48706	2.65638	7.23191	11.841	15.3014	17.899	21.6616	23.8526	29.395	35.0128	46.529
0.0386698	0.0824569	0.102947	0.15004	0.190098	0.225255	0.23894	0.27355	0.3114	0.390531	0.441379	0.478256	0.558149	0.648438	0.790676	0.973257	1.11155	1.49693	2.68813	7.42269	11.9044	15.6516	18.151	21.765	23.9332	30.2468	35.5688	47.1164
0.0395484	0.0826033	0.103313	0.150952	0.194789	0.226553	0.243378	0.276408	0.315191	0.394652	0.444152	0.486221	0.571828	0.65858	0.809443	0.97366	1.11736	1.51865	2.70864	7.49678	12.7096	15.6613	18.3896	21.8404	24.8567	30.6789	35.7395	49.3623
0.0400827	0.0833423	0.103529	0.15351	0.195585	0.226965	0.244183	0.279108	0.32095	0.397246	0.450113	0.492188	0.582714	0.663212	0.816831	0.984375	1.14689	1.52149	2.71329	7.5642	13.2663	15.8561	19.2362	22.5575	25.1787	31.129	35.9002	49.7314
0.0411876	0.0837081	0.10438	0.155138	0.196682	0.230512	0.244974	0.284497	0.323048	0.397323	0.451981	0.492188	0.587762	0.679451	0.833325	0.989279	1.16062	1.5499	2.74343	7.83275	13.4341	15.8878	19.6644	22.5977	25.4918	32.4555	35.9912	50.7705
0.0415412	0.083727	0.104477	0.158165	0.198134	0.230979	0.246094	0.28588	0.323424	0.401427	0.455399	0.492188	0.594598	0.686291	0.835108	1.01467	1.16695	1.55643	2.75141	7.83892	14.0468	16.0433	21.091	22.8215	25.5333	32.6897	36.0508	52.8855
0.041657	0.0841189	0.107705	0.158522	0.200894	0.233543	0.246094	0.285906	0.327725	0.403731	0.458089	0.4967	0.594624	0.687505	0.837014	1.01467	1.19038	1.57577	2.75141	8.02336	14.2246	16.049	21.1703	23.0699	26.7621	32.7748	36.0718	53.4519
0.0417497	0.0856118	0.110574	0.159705	0.201809	0.234449	0.246094	0.286553	0.328419	0.404928	0.458415	0.502749	0.598103	0.687655	0.841148	1.01467	1.19089	1.5937	2.81587	8.25424	14.4023	16.3611	21.3143	23.1537	28.1732	33.1524	38.4103	55.4377
0.0417639	0.0857947	0.111772	0.160362	0.202086	0.235983	0.246094	0.288263	0.3318	0.407564	0.460445	0.509818	0.602094	0.709229	0.841632	1.01467	1.22342	1.62437	2.83655	8.36719	14.5425	17.2792	21.568	23.2515	28.3784	33.2309	39.6219	56.338
0.0424776	0.0859021	0.11267	0.160876	0.202119	0.238706	0.246094	0.290094	0.332535	0.408807	0.461069	0.510247	0.608829	0.712397	0.85129	1.01467	1.23047	1.6473	2.86136	8.39619	14.8188	17.3265	21.6073	23.3502	28.5589	33.4697	40.1404	57.9277
0.0426034	0.085983	0.114134	0.16143	0.202239	0.238706	0.246094	0.29421	0.338824	0.409722	0.461409	0.513342	0.610417	0.717141	0.85632	1.01467	1.23047	1.66507	2.89443	8.3997	14.9693	17.7768	21.6562	23.3906	28.6175	33.7157	40.1887	58.8596
0.0434298	0.0859922	0.114384	0.161754	0.202691	0.240255	0.246094	0.294816	0.340431	0.411497	0.469711	0.514343	0.610703	0.717695	0.863874	1.02356	1.23047	1.69195	2.96336	8.66935	15.0982	18.2209	21.7456	23.48	28.8012	33.7157	40.6956	59.6872
0.0450294	0.0865107	0.116239	0.165843	0.203591	0.242331	0.246094	0.296681	0.340557	0.415353	0.481784	0.523405	0.614594	0.721542	0.865642	1.03161	1.23047	1.69387	2.97969	8.72322	15.1563	18.2641	21.7692	23.5101	29.1956	33.7184	41.8475	63.4602
0.0451634	0.0866295	0.11895	0.167102	0.203667	0.242882	0.246094	0.299983	0.347094	0.415529	0.486221	0.526416	0.615783	0.73201	0.871047	1.04571	1.23324	1.70013	2.99386	8.73617	15.2538	18.2922	21.8248	23.582	29.2111	33.9609	42.1126	67.8407
0.0457676	0.0873638	0.120827	0.16764	0.203882	0.243293	0.246094	0.300064	0.348029	0.416357	0.487663	0.527416	0.617907	0.738121	0.872673	1.05062	1.23491	1.71478	3.00396	9.32935	16.0716	19.3305	21.9079	23.7655	29.8731	34.0162	42.7502	74.9112
0.0460743	0.0875513	0.122356	0.168164	0.203909	0.243366	0.255713	0.302609	0.348029	0.424367	0.49056	0.530458	0.620731	0.760496	0.873245	1.05895	1.26488	1.86389	3.04401	9.64744	16.1029	19.4846	21.9105	23.8369	29.9732	34.1815	42.8231	76.8018
0.0466763	0.0883836	0.12243	0.168281	0.205795	0.245264	0.256505	0.304741	0.348029	0.424749	0.492188	0.538414	0.622086	0.764413	0.874052	1.06098	1.28047	1.87419	3.04401	9.71057	16.2739	19.8407	21.9906	23.8406	30.3245	34.769	43.6436	78.0905
0.0466859	0.0889932	0.123548	0.168686	0.206396	0.245945	0.257107	0.305101	0.348029	0.429042	0.492188	0.550282	0.623176	0.769886	0.887304	1.08197	1.29434	1.90506	3.05735	10.0898	16.6546	20.2037	22.0622	24.3235	30.8203	35.0336	44.5538	83.0781
0.0471815	0.0891542	0.123697	0.169535	0.206895	0.246094	0.257542	0.30626	0.348029	0.429233	0.492188	0.550282	0.626908	0.773321	0.905292	1.09779	1.29574	1.91092	3.19922	10.2358	16.9519	20.2172	22.5871	24.3521	31.2781	35.5688	44.6104	92.1141
0.0477138	0.0893429	0.124341	0.170263	0.207197	0.246094	0.258362	0.309079	0.348029	0.431527	0.492188	0.553754	0.650589	0.778217	0.908813	1.10056	1.29794	1.92205	3.23686	10.3094	17.431	20.6748	22.6364	25.7283	31.8156	35.5823	44.9983	100.642
0.0485193	0.0895541	0.126416	0.171122	0.207287	0.246094	0.259321	0.310298	0.351367	0.432376	0.493985	0.554464	0.657323	0.778217	0.91836	1.10056	1.31065	1.92205	3.23686	10.7636	17.4796	20.6909	22.7239	27.4076	31.8832	35.6836	46.1349
0.0487174	0.0901296	0.126734	0.171583	0.207475	0.246094	0.262456	0.311178	0.351418	0.432526	0.502149	0.555785	0.661894	0.778217	0.918433	1.10056	1.31744	1.96875	3.26608	11.2538	17.6125	20.918	22.7287	27.4458	32.0007	35.8056	46.26
0.0487621	0.090292	0.128759	0.172465	0.207706	0.246094	0.263271	0.313564	0.354038	0.434665	0.503947	0.569849	0.67011	0.778217	0.935954	1.11065	1.32166	1.99184	3.26943	11.4506	17.9159	21.0694	23.0378	27.7075	32.3086	35.8495	47.5467
0.0493505	0.0924983	0.129272	0.173052	0.207992	0.246094	0.264539	0.313755	0.355137	0.437206	0.505442	0.575101	0.687655	0.780187	0.938293	1.1146	1.32514	2.04033	3.39109	11.833	18.0523	21.2497	23.0541	27.7912	32.4106	36.0315	47.6926
0.0494417	0.0925995	0.129822	0.173174	0.209828	0.246094	0.265024	0.314746	0.35804	0.440923	0.50549	0.580485	0.688423	0.780619	0.946679	1.11605	1.32526	2.04334	3.39612	11.9293	18.0875	21.3078	23.1014	27.8123	32.4853	36.4518	47.7425
0.0503131	0.0930053	0.130511	0.174036	0.210876	0.246094	0.265346	0.315037	0.361188	0.441953	0.505658	0.587729	0.694613	0.788755	0.958356	1.12321	1.32526	2.06119	3.40655	12.2427	18.1593	21.5567	23.1536	28.2445	32.5328	37.6531	48.4682
0.0504494	0.0934691	0.130533	0.176028	0.211771	0.246094	0.273584	0.315683	0.363152	0.445032	0.505796	0.589725	0.696058	0.790676	0.979536	1.12665	1.3476	2.10777	3.49765	12.5725	18.2641	21.6248	23.2386	28.643	32.7305	38.4293	49.863
0.0506249	0.0937519	0.131219	0.176339	0.212384	0.246094	0.273649	0.317027	0.363225	0.452138	0.507968	0.59653	0.696058	0.80867	0.981336	1.14043	1.35345	2.14956	3.59988	12.8063	18.7047	21.7288	23.3735	28.8529	32.9665	38.504	50.0386
0.0507492	0.0941373	0.132935	0.17818	0.213115	0.246094	0.275231	0.318694	0.364512	0.454378	0.508291	0.601825	0.696364	0.813804	0.984375	1.14088	1.39212	2.15246	3.7437	13.0314	18.7096	21.7901	23.4847	29.0901	32.9775	38.6649	51.4606
0.0515403	0.0944134	0.133181	0.178284	0.213255	0.246094	0.278546	0.321148	0.365406	0.458089	0.50898	0.603756	0.710415	0.843996	0.995541	1.14581	1.4186	2.20113	3.76451	13.3889	18.8643	21.804	23.5358	29.3904	32.9913	38.9606	52.4985
0.0517753	0.0956431	0.134085	0.1817	0.214298	0.246309	0.283414	0.321982	0.366904	0.460445	0.509541	0.607441	0.712991	0.845604	1.00732	1.15461	1.44622	2.22095	3.94518	13.9299	19.3054	21.9394	23.5968	29.7855	33.2673	39.628	53.7529
0.0529041	0.096897	0.134654	0.181793	0.216972	0.248293	0.284523	0.32419	0.369211	0.461351	0.511017	0.613652	0.717497	0.849378	1.01352	1.15939	1.46908	2.22515	3.96814	13.9407	19.3227	21.9577	23.7003	30.0486	33.8162	40.6532	55.0763
0.0529213	0.0969251	0.134686	0.182525	0.21798	0.248507	0.286949	0.324299	0.369512	0.466532	0.512173	0.614916	0.722586	0.85129	1.01355	1.15999	1.48001	2.22847	4.19083	14.0877	19.607	22.03	24.1749	30.0849	33.9546	40.8062	55.1146
0.053934	0.0970774	0.135084	0.182608	0.218134	0.249208	0.287477	0.325389	0.371014	0.469773	0.513342	0.615109	0.729474	0.857529	1.01467	1.17361	1.4906	2.24917	4.19083	14.2182	19.7075	22.2669	25.319	30.5181	34.4962	41.1277	55.9465
0.0546749	0.0988263	0.135223	0.183007	0.219762	0.24964	0.289791	0.325677	0.37157	0.47414	0.515188	0.616196	0.738281	0.862584	1.01467	1.18525	1.50088	2.27802	4.19083	14.2492	19.8788	22.3791	25.9663	30.7706	34.6328	41.6364	57.665
0.0548643	0.0990748	0.136312	0.183096	0.22035	0.250737	0.290498	0.327588	0.371947	0.476339	0.524209	0.616327	0.738281	0.865807	1.03058	1.19388	1.51865	2.28314	4.20525	14.32	20.2516	22.4072	26.0582	30.7942	35.0465	41.7718	58.3621
0.0556117	0.0991257	0.136435	0.187133	0.220534	0.251498	0.293788	0.328702	0.372218	0.476357	0.527085	0.617149	0.739455	0.867077	1.04409	1.21003	1.52485	2.33364	4.23396	15.0198	20.8498	22.5222	26.6449	30.9071	35.0915	43.0959	58.7335
0.0562954	0.101315	0.136463	0.187166	0.221287	0.251685	0.294168	0.328988	0.374028	0.479071	0.5327	0.622029	0.739886	0.871047	1.0448	1.21198	1.56047	2.3763	4.24824	15.3488	21.1836	22.774	26.8513	30.9171	35.3947	43.2213	63.0812
0.0564925	0.101707	0.137838	0.187352	0.222225	0.25299	0.296474	0.332946	0.374892	0.479159	0.538198	0.622221	0.739976	0.881505	1.05062	1.22501	1.58304	2.37927	4.43064	16.1224	21.2986	22.8138	26.9155	31.2684	35.6292	43.3237	67.5293
0.0567988	0.102045	0.13948	0.187834	0.222449	0.254434	0.296803	0.335883	0.387263	0.479187	0.538982	0.622632	0.743985	0.88385	1.06098	1.22579	1.58947	2.47321	4.4312	16.2253	21.3617	22.9509	27.0365	31.5	35.6836	44.6967	71.4511
0.0569324	0.1029	0.1397	0.189689	0.222855	0.255919	0.298514	0.338833	0.397323	0.482255	0.540166	0.62749	0.744564	0.884637	1.06455	1.22891	1.60095	2.50169	4.50608	16.3611	21.4455	23.0217	27.323	31.5154	35.6836	45.1237	73.9674
0.0573505	0.103136	0.140121	0.189964	0.223324	0.257639	0.299147	0.340299	0.399814	0.484589	0.540383	0.632545	0.746487	0.887304	1.07461	1.23047	1.61084	2.508	4.52887	16.422	21.4867	23.2107	27.5559	31.6735	35.7861	45.9897	75.5512
0.0574934	0.104374	0.14014	0.190003	0.224685	0.260076	0.300863	0.343701	0.402432	0.485326	0.547616	0.633444	0.749355	0.888604	1.07624	1.23047	1.6179	2.5566	4.52987	16.9662	21.6367	23.2164	27.8079	31.747	35.8056	46.0423	75.9968
0.0586057	0.105358	0.140585	0.190199	0.229539	0.263618	0.301304	0.347125	0.409265	0.485361	0.548219	0.637579	0.753358	0.890142	1.08698	1.2386	1.64831	2.56575	4.90415	16.9823	21.7554	23.2367	27.8619	31.9992	36.4626	46.2318	77.292
0.0587685	0.105394	0.140954	0.190279	0.231627	0.266204	0.301448	0.348029	0.41113	0.487828	0.550282	0.637834	0.762639	0.896361	1.09321	1.24445	1.65085	2.57502	4.92802	17.0001	21.8935	23.6029	28.3424	32.2467	36.5621	46.2782	85.7751
0.0588596	0.107105	0.141321	0.191161	0.231967	0.267075	0.303879	0.348029	0.413159	0.488529	0.55342	0.651664	0.765911	0.919285	1.10056	1.25484	1.66481	2.5956	4.93141	17.0942	21.9079	23.6669	28.8192	32.2721	36.6977	46.3787	94.5428
0.0589389	0.108829	0.142459	0.191634	0.23197	0.268562	0.303883	0.348029	0.41321	0.492188	0.554486	0.668075	0.775831	0.923059	1.10056	1.26315	1.67408	2.59998	4.97694	17.1949	22.0237	24.127	28.8743	32.434	37.2773	46.5688	102.719
0.0589776	0.110419	0.142949	0.191687	0.232948	0.270719	0.304498	0.348029	0.414893	0.492188	0.5552	0.677677	0.778217	0.923599	1.11032	1.27109	1.71099	2.60486	5.04942	17.2494	22.05	24.9715	29.5037	32.6934	37.4459	47.5664
0.0592576	0.111336	0.143799	0.192129	0.234487	0.27102	0.305644	0.348029	0.415742	0.492188	0.563571	0.681493	0.779963	0.924101	1.1198	1.28666	1.72266	2.63212	5.09155	17.2897	22.1581	25.0349	29.6152	33.0353	37.4871	47.6931
0.0595304	0.112121	0.144663	0.192192	0.236119	0.273003	0.310954	0.348653	0.417914	0.492188	0.565436	0.690533	0.788482	0.927405	1.13012	1.31333	1.72266	2.65051	5.48691	17.3265	22.2414	25.0895	29.6796	33.3391	38.5677	49.4889
0.0600633	0.112804	0.144784	0.192376	0.236456	0.273332	0.316379	0.349441	0.4223	0.492188	0.57118	0.693319	0.789455	0.933255	1.14005	1.3235	1.72578	2.65135	5.50282	17.4779	22.4451	25.153	29.7814	33.707	39.3145	49.555
0.0603419	0.113071	0.145707	0.192461	0.238093	0.27338	0.316512	0.352797	0.423105	0.492188	0.575123	0.694717	0.794953	0.942319	1.14258	1.32526	1.74015	2.67367	5.55213	17.4882	22.5151	25.4668	29.8981	33.7157	39.6234	49.6865
0.0609256	0.113267	0.146363	0.192572	0.238372	0.274189	0.316987	0.352833	0.423212	0.492188	0.575263	0.696058	0.797232	0.948515	1.16047	1.32526	1.74015	2.70357	5.74512	17.7273	22.5616	25.6658	30.0244	33.8663	40.2201	50.5092
0.0619209	0.11335	0.146726	0.19292	0.238417	0.274201	0.319591	0.353687	0.429476	0.494579	0.579133	0.701071	0.802514	0.978428	1.17377	1.32526	1.76269	2.70659	5.84958	17.7461	22.5884	25.6894	30.0882	33.8806	40.4269	51.7071
0.0626452	0.115022	0.148305	0.193791	0.239706	0.275173	0.320017	0.354382	0.431623	0.497247	0.580035	0.706669	0.80361	0.984375	1.18862	1.32526	1.82393	2.71587	6.03056	17.7461	22.7167	26.0054	30.2495	34.0046	40.551	52.142
0.0629419	0.115441	0.151871	0.193844	0.240133	0.275615	0.3205	0.35619	0.43163	0.497581	0.580977	0.707963	0.805806	0.984375	1.19	1.3342	1.85218	2.77833	6.15234	17.9783	22.9236	26.008	30.5166	34.6013	41.1607	53.3027
0.0630213	0.115749	0.153241	0.195147	0.240307	0.278072	0.321167	0.358348	0.432964	0.498687	0.581391	0.711266	0.815371	0.989481	1.19003	1.35299	1.86787	2.8059	6.27418	18.1677	23.1394	26.1451	30.7775	34.721	41.6073	54.1641
0.063287	0.115902	0.153527	0.195569	0.241875	0.280606	0.321653	0.358637	0.432964	0.502202	0.581496	0.711317	0.826367	0.993945	1.2143	1.36755	1.92205	2.81208	6.53553	18.2724	23.1427	26.6339	30.9185	35.0007	41.8822	54.8148
0.0636753	0.116437	0.155762	0.196242	0.242319	0.281115	0.321708	0.359181	0.433357	0.504838	0.593552	0.712442	0.828646	0.994358	1.21664	1.39212	1.94067	2.82536	6.62628	19.2174	23.2525	26.7485	31.0166	35.0699	42.663	55.4121
0.0639357	0.116953	0.157514	0.196994	0.242429	0.285758	0.323926	0.360374	0.43448	0.505658	0.596377	0.714443	0.829725	1.00171	1.22103	1.39212	1.94738	2.86135	6.62696	19.2536	23.3011	27.0959	31.1326	35.1664	42.7515	57.3245
0.0639647	0.116974	0.157768	0.198846	0.242457	0.287164	0.325526	0.365406	0.434682	0.513342	0.597413	0.715204	0.830387	1.01224	1.22667	1.39635	1.95981	2.86419	6.92502	19.4714	23.3517	27.4232	31.524	35.2766	43.7436	57.5661
0.0639848	0.119161	0.158126	0.199047	0.243321	0.287229	0.326899	0.369211	0.437275	0.514173	0.602664	0.724449	0.836031	1.01467	1.22784	1.42219	1.97389	2.95022	7.23783	19.7566	23.7536	27.5493	31.5471	35.3365	44.3973	58.3548
0.0646891	0.121856	0.158932	0.200819	0.244462	0.291783	0.327749	0.369211	0.439382	0.518908	0.604658	0.726209	0.838018	1.01467	1.23047	1.43293	1.98407	2.9617	7.24202	20.0306	23.7748	27.826	31.6808	35.4793	44.5075	62.7674
0.0648079	0.122346	0.158936	0.201407	0.244563	0.293368	0.327915	0.371576	0.444152	0.522531	0.606372	0.729794	0.840379	1.01467	1.23047	1.43496	2.03239	2.97356	7.24702	20.39	23.7849	28.1129	31.7194	35.5228	44.569	67.687
0.0648564	0.123038	0.160226	0.201505	0.245228	0.293449	0.32806	0.373586	0.446099	0.52804	0.61002	0.738121	0.840867	1.03409	1.23047	1.45193	2.0406	3.00396	7.2481	20.405	24.2424	28.199	31.7537	35.5603	44.679	67.7831
0.0654708	0.12345	0.160782	0.202987	0.246094	0.294038	0.329371	0.374303	0.447441	0.529579	0.611907	0.738281	0.849071	1.04336	1.23047	1.46803	2.10188	3.0635	7.35932	20.5314	24.3343	28.2767	32.1065	35.5816	45.4857	70.5126
0.0655204	0.123671	0.161045	0.203048	0.246094	0.294452	0.329946	0.380978	0.447741	0.53321	0.614594	0.738281	0.849761	1.05337	1.23047	1.47344	2.11007	3.12777	7.42654	20.5634	24.4637	28.794	32.242	35.6292	45.5584	72.3232
0.0656349	0.124335	0.161181	0.204	0.246094	0.294647	0.330077	0.382381	0.447823	0.541082	0.615537	0.738281	0.857866	1.06376	1.23047	1.47598	2.11117	3.14694	7.43885	20.5934	24.5132	28.9618	32.3143	35.8056	45.5626	72.7181
0.0666997	0.124508	0.162544	0.205861	0.246094	0.29466	0.33052	0.386288	0.452138	0.542654	0.616151	0.738281	0.870373	1.07172	1.23724	1.48233	2.12538	3.19389	7.4725	20.6201	24.6852	29.0434	32.3236	36.4767	45.9115	73.3012
0.0667527	0.124844	0.165182	0.20672	0.246094	0.294688	0.331413	0.387175	0.452479	0.544392	0.616698	0.738281	0.870583	1.07372	1.25484	1.49693	2.14659	3.19922	7.62046	20.6719	25.1401	29.2893	32.7221	36.8818	45.9191	73.4552
0.0669855	0.125884	0.16592	0.207405	0.246094	0.295095	0.332463	0.39139	0.45328	0.545343	0.618605	0.738281	0.870683	1.07646	1.25484	1.49693	2.16375	3.20867	7.63287	20.7347	25.1438	29.3358	32.7453	37.666	46.592	80.0048
0.0671834	0.1262	0.166351	0.207506	0.246094	0.296057	0.337092	0.391872	0.458492	0.545937	0.630565	0.739278	0.874267	1.08258	1.25484	1.50235	2.19003	3.20996	7.80727	21.0104	25.1991	29.4203	32.8422	38.6775	47.3096	88.2032
0.0682962	0.126366	0.166453	0.207586	0.246094	0.29611	0.337468	0.392455	0.460445	0.546378	0.633155	0.743985	0.887304	1.08583	1.25484	1.51428	2.20113	3.22576	7.8115	21.1726	25.6363	29.6551	32.8892	39.1304	47.3374	96.6373
0.0684081	0.126657	0.168163	0.208357	0.246094	0.298186	0.340931	0.393478	0.463693	0.549662	0.637747	0.746487	0.887304	1.0917	1.26217	1.51865	2.20113	3.30169	7.86346	21.5299	26.157	29.6644	33.3064	39.1695	47.6899	103.713
0.0686139	0.127484	0.168316	0.208719	0.246094	0.298712	0.342086	0.394114	0.467101	0.550254	0.647216	0.749857	0.890142	1.09673	1.2658	1.56924	2.20466	3.3332	7.88183	21.796	26.3464	29.7865	33.3763	39.1931	48.0229
0.0689383	0.128037	0.16916	0.209324	0.246094	0.300396	0.343312	0.395287	0.468933	0.550282	0.651261	0.753358	0.898587	1.10056	1.26583	1.57577	2.21366	3.45409	8.05942	21.8148	26.5257	30.1241	33.542	39.6974	49.138
0.068939	0.128395	0.169593	0.209463	0.246094	0.300596	0.344064	0.395526	0.477134	0.550282	0.652156	0.754447	0.902887	1.10056	1.26911	1.58326	2.26656	3.48029	8.1606	21.8691	26.6805	30.2945	33.553	39.7519	49.5682
0.0691635	0.128998	0.170485	0.212031	0.246094	0.301494	0.347782	0.399973	0.479398	0.550282	0.655572	0.756806	0.907767	1.10201	1.27088	1.59694	2.26887	3.5035	8.17757	21.9143	26.8344	30.5642	33.5988	39.8	49.5863
0.0692519	0.129367	0.172281	0.212257	0.246094	0.303008	0.348029	0.401114	0.480417	0.550282	0.656277	0.758424	0.909884	1.10989	1.27342	1.60794	2.26887	3.58318	8.18054	22.1101	27.024	30.6285	33.8439	39.8017	49.746
0.0696042	0.129836	0.172465	0.212711	0.246094	0.303364	0.348029	0.40568	0.480594	0.550282	0.660656	0.762563	0.924571	1.11136	1.27387	1.61969	2.29547	3.70358	8.28664	22.1349	27.0535	30.7087	33.8439	40.747	51.2061
0.069834	0.130393	0.172713	0.213112	0.246094	0.306828	0.348029	0.407393	0.484148	0.550282	0.666894	0.764982	0.927379	1.11198	1.27512	1.62729	2.29959	3.72405	8.4594	22.175	27.2587	30.7971	33.8663	41.5089	51.8821
0.0700086	0.130835	0.172996	0.213349	0.246094	0.30692	0.348029	0.410402	0.484343	0.550282	0.670378	0.778217	0.947364	1.11403	1.28025	1.63917	2.3004	3.72969	8.58511	22.2179	27.3208	30.9093	33.993	42.0623	52.7332
0.0701571	0.131285	0.173266	0.213778	0.246094	0.308181	0.348029	0.410741	0.484358	0.551784	0.673054	0.778217	0.948515	1.14384	1.29063	1.66364	2.30325	3.89108	8.92214	22.5822	27.3784	31.0702	33.9943	42.1411	53.7871
0.0710296	0.131752	0.17493	0.213781	0.246094	0.310435	0.348029	0.410807	0.490803	0.552535	0.677677	0.778217	0.964506	1.14522	1.29628	1.66907	2.32956	3.94518	9.18823	22.674	27.7035	31.0995	34.1353	42.321	54.3398
0.07116	0.131846	0.175398	0.21425	0.246094	0.310954	0.348029	0.411137	0.491555	0.553821	0.678955	0.778217	0.97146	1.14623	1.32526	1.68056	2.33465	3.96814	9.37097	22.7228	27.8782	31.2626	34.5251	42.4136	54.7144
0.0713778	0.133178	0.176568	0.21505	0.248057	0.310998	0.348029	0.41221	0.492188	0.554389	0.679098	0.778217	0.973257	1.15161	1.32526	1.68251	2.33877	4.14208	9.5089	22.7532	27.9335	31.2859	34.8464	42.8301	55.4214
0.0717937	0.134997	0.177182	0.215792	0.248323	0.31122	0.348029	0.412537	0.492188	0.55617	0.68359	0.778217	0.973855	1.15297	1.32526	1.71677	2.34338	4.19083	9.60081	22.8411	28.0547	31.4432	35.1147	43.0996	57.6581
0.0721363	0.135143	0.177897	0.216048	0.249036	0.31157	0.348029	0.416511	0.492188	0.564324	0.685901	0.778217	0.975454	1.15422	1.33079	1.73116	2.34599	4.19083	9.71057	22.9165	28.0558	31.4849	35.3365	43.8134	58.0406
0.0723568	0.135816	0.178928	0.216829	0.250281	0.312026	0.348029	0.417099	0.492188	0.566661	0.689264	0.78029	0.979134	1.15762	1.34041	1.74003	2.34878	4.24824	9.92609	23.0186	28.1075	31.5087	35.5816	43.8612	62.9178
0.0725565	0.136237	0.18082	0.218413	0.250544	0.313666	0.348029	0.417579	0.492188	0.567126	0.689716	0.7827	0.983886	1.1607	1.37372	1.77461	2.3553	4.24981	9.98932	23.2633	28.1379	31.5615	35.6666	44.1913	64.2135
0.0726228	0.136258	0.181098	0.218951	0.251731	0.314434	0.351319	0.423395	0.499614	0.571994	0.692877	0.784689	0.984375	1.17214	1.39126	1.79159	2.36225	4.29784	10.3066	23.2907	28.7256	31.6161	35.6966	44.982	66.851
0.0727357	0.136336	0.18163	0.220944	0.25186	0.315387	0.358158	0.42371	0.500343	0.57615	0.693272	0.785322	0.984375	1.17352	1.39308	1.79721	2.36512	4.31601	10.3856	23.322	28.8885	31.8613	35.7082	45.1413	67.5201
0.0731518	0.136596	0.18205	0.221313	0.252156	0.315988	0.359215	0.423898	0.501389	0.576204	0.696058	0.790038	0.984375	1.17615	1.42219	1.80844	2.38603	4.32062	10.4929	23.3758	29.0651	31.9069	36.8361	45.2156	67.5795
0.0733051	0.137163	0.182387	0.221879	0.252771	0.318136	0.359279	0.425349	0.505658	0.576232	0.696058	0.790676	1.00239	1.17833	1.42669	1.85045	2.39134	4.35708	10.4929	23.4617	29.0651	31.9069	37.0655	45.5687	69.2657
0.0734869	0.137873	0.183307	0.222218	0.253043	0.318592	0.359609	0.432095	0.506276	0.580597	0.717695	0.791685	1.00636	1.18328	1.43087	1.85247	2.40288	4.38157	10.5284	23.47	29.3358	32.0688	37.2586	45.5748	70.195
0.0735802	0.138095	0.183692	0.224903	0.254463	0.322458	0.361269	0.432952	0.507538	0.586381	0.722415	0.798067	1.00798	1.19503	1.43496	1.87419	2.40703	4.43652	10.6066	23.5762	29.4046	32.0867	37.372	45.5905	70.6203
0.0739875	0.138371	0.184077	0.225495	0.25746	0.324221	0.361293	0.436896	0.507968	0.58859	0.726592	0.809088	1.01467	1.19627	1.43833	1.87419	2.43678	4.43652	10.8067	23.6063	29.5681	32.3971	37.4038	46.1713	70.7527
0.0743029	0.138749	0.184129	0.225981	0.259179	0.325414	0.361666	0.437305	0.51474	0.598228	0.727541	0.816831	1.01467	1.20334	1.44427	1.87462	2.43944	4.44008	11.0056	23.609	29.8139	32.4489	37.4621	46.3666	75.0603
0.0745974	0.139976	0.184372	0.226411	0.259266	0.325546	0.362062	0.437817	0.522531	0.60041	0.727731	0.818234	1.01467	1.20498	1.47644	1.89869	2.45339	4.53519	11.1369	23.8914	29.8424	32.4881	37.55	46.7619	82.4233
0.0748264	0.140118	0.184382	0.226877	0.261558	0.325825	0.36288	0.439511	0.52293	0.606302	0.729511	0.818848	1.01467	1.20802	1.49693	1.89987	2.4593	4.53774	11.4506	24.1893	29.8789	32.5179	38.6723	46.9178	90.2966
0.0749602	0.140543	0.184825	0.227545	0.262132	0.328419	0.363989	0.440216	0.523246	0.607028	0.731556	0.826767	1.01467	1.21017	1.49693	1.92205	2.4772	4.69871	11.5349	24.2815	29.9234	32.5328	38.8373	47.1657	97.6673
0.0750087	0.140712	0.18505	0.228957	0.262859	0.329782	0.364028	0.441848	0.525959	0.612446	0.733966	0.833253	1.01467	1.21203	1.49693	1.92205	2.49758	4.73371	11.6659	24.6264	29.9487	32.8045	39.0617	47.8304	103.677
0.0751231	0.141158	0.18623	0.229442	0.264433	0.331023	0.365375	0.442742	0.526123	0.614026	0.736466	0.834843	1.01974	1.21282	1.51088	1.93268	2.50872	5.01614	11.7224	24.6401	30.0486	32.8634	39.2665	48.88
0.0752196	0.141309	0.186588	0.22988	0.264907	0.331377	0.367812	0.443052	0.527263	0.624193	0.736631	0.835874	1.02323	1.22315	1.55643	1.95209	2.50967	5.04942	12.0513	24.7627	30.0728	33.0289	39.3088	49.1949
0.0753526	0.142036	0.18819	0.230539	0.265334	0.33204	0.368177	0.443842	0.527833	0.626383	0.737324	0.840379	1.02916	1.23047	1.55643	1.97043	2.56971	5.18473	12.053	25.2683	30.105	33.6213	40.3153	49.1954
0.0754012	0.142504	0.188406	0.23293	0.265869	0.333152	0.369211	0.444466	0.52804	0.630565	0.738281	0.844928	1.04219	1.23047	1.55643	1.97728	2.60984	5.27807	12.1177	25.5001	30.1452	33.74	40.3422	49.4668
0.0758851	0.142894	0.188888	0.23332	0.268683	0.333674	0.369211	0.445201	0.532128	0.631297	0.738281	0.859146	1.04409	1.23047	1.55643	1.98887	2.61601	5.39726	12.1943	25.6186	30.1683	33.9608	40.3463	50.607
0.0765664	0.142904	0.188912	0.235393	0.268782	0.335221	0.369264	0.447823	0.532865	0.632685	0.738281	0.863095	1.04409	1.23047	1.55643	2.00986	2.6305	5.50282	12.4369	25.6384	30.2175	33.9805	40.5906	51.6293
0.0766583	0.142912	0.189354	0.237425	0.269976	0.337716	0.370594	0.448622	0.534178	0.638037	0.738281	0.864955	1.04409	1.23047	1.56101	2.01324	2.6795	5.6157	12.4952	25.8586	30.2981	34.0891	41.3897	51.7798
0.0770114	0.143425	0.189381	0.238125	0.271175	0.337853	0.370769	0.449751	0.536702	0.642109	0.738656	0.867319	1.04541	1.23047	1.57577	2.02934	2.6844	5.69415	12.8771	26.0836	30.5196	34.1228	41.8356	52.4101
0.0772499	0.143646	0.190467	0.240461	0.271846	0.33857	0.371255	0.449971	0.537797	0.642136	0.739937	0.868986	1.04767	1.23744	1.59581	2.03014	2.68885	5.74512	13.1055	26.0871	30.6196	34.4943	41.9844	52.9742
0.0777716	0.143684	0.191117	0.24127	0.272022	0.341538	0.374556	0.452138	0.541093	0.643317	0.74341	0.873421	1.04901	1.24515	1.61454	2.03889	2.72804	5.80802	13.1332	26.4468	30.6418	34.5593	42.1913	53.4709
0.0781455	0.144851	0.191362	0.24139	0.273304	0.343862	0.375137	0.457042	0.541499	0.644872	0.747833	0.880033	1.04914	1.25484	1.61729	2.06347	2.77017	5.9165	13.3459	26.4468	31.0673	34.625	42.5996	54.8037
0.0782409	0.145766	0.191916	0.242403	0.274055	0.344487	0.376468	0.457248	0.542087	0.645976	0.750023	0.886731	1.06342	1.25484	1.61776	2.08549	2.77422	5.99277	13.3481	26.6929	31.2549	34.6722	43.1421	57.6564
0.0786473	0.14596	0.192865	0.243194	0.27847	0.344605	0.377286	0.458381	0.543903	0.646183	0.751447	0.887304	1.06935	1.25484	1.62347	2.10263	2.78423	6.08802	13.6244	26.8044	31.2626	34.9228	43.3615	58.1906
0.0794022	0.146353	0.193342	0.243795	0.279531	0.348029	0.378097	0.460641	0.544392	0.648854	0.753201	0.887304	1.07824	1.26495	1.65085	2.10263	2.79075	6.10601	13.8558	26.8547	31.4224	35.0699	43.5636	60.6595
0.0795463	0.146613	0.193951	0.244241	0.282782	0.348029	0.378392	0.460853	0.54461	0.651426	0.755661	0.887304	1.08775	1.29886	1.65085	2.10263	2.87119	6.11284	14.2416	27.0609	31.4432	35.3365	44.2276	62.8041
0.0795718	0.146877	0.194691	0.245461	0.283313	0.348029	0.378459	0.462146	0.545071	0.651589	0.761178	0.890137	1.09416	1.30421	1.65918	2.11237	2.88298	6.30308	14.3855	27.1251	31.5471	35.3417	44.3621	63.2863
0.0802629	0.147317	0.196658	0.246094	0.283698	0.348029	0.380596	0.46331	0.547336	0.652325	0.762851	0.891935	1.09481	1.32526	1.68049	2.12391	2.92565	6.30308	14.484	27.2187	31.596	35.3606	44.4048	63.4273
0.0802982	0.148596	0.19873	0.246094	0.285007	0.348029	0.381477	0.464121	0.548453	0.652548	0.768104	0.898776	1.09497	1.32526	1.68519	2.13641	2.97243	6.30944	15.1623	27.3264	31.6783	35.636	44.6143	65.6074
0.0806423	0.148795	0.198838	0.246094	0.285301	0.348029	0.3829	0.464425	0.548555	0.652826	0.769729	0.907471	1.09671	1.32526	1.69472	2.15493	2.99386	6.39861	15.1802	27.3519	31.8413	35.8754	44.7909	67.0284
0.0810883	0.149837	0.199827	0.246094	0.28553	0.348029	0.384478	0.468319	0.550282	0.655753	0.778217	0.910602	1.10145	1.32526	1.70721	2.16588	3.03376	6.45967	15.4181	27.8423	31.8613	36.1495	44.9417	67.1656
0.081274	0.149942	0.200578	0.246094	0.287162	0.348029	0.385913	0.468442	0.550282	0.657508	0.778217	0.914921	1.10237	1.33103	1.71002	2.17005	3.11287	6.47355	15.8191	27.94	31.8641	36.5056	44.9489	67.302
0.0817399	0.150262	0.200787	0.246094	0.288415	0.348029	0.391347	0.471823	0.550282	0.662426	0.780732	0.917411	1.10409	1.35376	1.71869	2.173	3.11287	6.50172	15.8726	27.965	31.8822	36.558	45.319	67.644
0.0818117	0.151538	0.201209	0.246094	0.289176	0.348029	0.392333	0.476677	0.550282	0.665766	0.781937	0.931906	1.10424	1.35701	1.72266	2.17404	3.12832	6.58717	15.8821	28.0935	32.0045	37.0568	45.3701	67.9121
0.0819533	0.152425	0.20126	0.246094	0.289614	0.348029	0.393381	0.479398	0.550282	0.666286	0.782597	0.947247	1.10551	1.35733	1.73311	2.17987	3.17042	6.58804	15.9582	28.185	32.1743	37.5568	45.7492	70.2739
0.0822633	0.152969	0.201429	0.246094	0.291318	0.348029	0.39352	0.481227	0.550282	0.672077	0.78316	0.958199	1.11078	1.35788	1.74015	2.18701	3.20153	6.7509	16.032	28.2676	32.2449	37.8669	45.7942	77.4585
0.0824414	0.153671	0.201839	0.246094	0.293815	0.348029	0.393899	0.481829	0.550282	0.674239	0.787029	0.958408	1.11093	1.38272	1.74015	2.20035	3.25193	6.93291	16.032	28.3275	32.2468	37.9215	46.2667	84.4683
0.0824437	0.154093	0.20238	0.246094	0.294309	0.348029	0.394179	0.482588	0.551661	0.678901	0.791564	0.958737	1.11564	1.38303	1.74655	2.20357	3.5309	7.15252	16.09	28.3393	32.3583	38.5012	46.984	91.3327
0.0831857	0.155136	0.203569	0.246094	0.294512	0.348329	0.395296	0.48337	0.553387	0.679751	0.79171	0.96038	1.1161	1.39212	1.75156	2.20941	3.53495	7.16636	16.1093	28.3692	32.466	38.5054	47.2351	97.6896
0.083273	0.155172	0.203643	0.246094	0.298087	0.34841	0.396397	0.486241	0.558294	0.68	0.795993	0.9669	1.12788	1.4013	1.75263	2.21078	3.63353	7.21037	16.2235	28.3873	32.7947	38.8005	48.5671	102.988
0.083321	0.155422	0.204922	0.246094	0.298274	0.351461	0.396605	0.489674	0.559156	0.682539	0.799845	0.969852	1.12857	1.40866	1.75575	2.21143	3.84113	7.21428	16.2441	28.4657	32.8229	38.8524	48.7756
0.0834095	0.15556	0.205651	0.246094	0.298307	0.351542	0.399593	0.489823	0.559913	0.687789	0.805665	0.984375	1.13011	1.43314	1.75686	2.2186	3.94518	7.28995	16.2664	28.515	33.0069	39.6998	48.8742
0.0836727	0.156201	0.205662	0.246094	0.299749	0.356087	0.399973	0.492188	0.560286	0.690533	0.812577	0.98721	1.13297	1.43496	1.76561	2.22317	4.06482	7.46229	16.3017	28.585	33.0261	40.2279	49.4776
0.0838997	0.157479	0.205878	0.246094	0.300271	0.356459	0.405566	0.492188	0.5625	0.691212	0.812599	0.988879	1.13531	1.43496	1.79159	2.22496	4.06868	7.51709	16.6564	28.585	33.1371	40.4489	49.5331
0.0839618	0.157586	0.2063	0.246094	0.300384	0.356579	0.407564	0.492188	0.563656	0.693504	0.818215	0.989242	1.13533	1.43496	1.79315	2.23477	4.10605	7.59709	16.68	28.7214	33.2372	40.8091	49.6784
0.0844206	0.1587	0.206331	0.246094	0.302034	0.357911	0.407588	0.492188	0.563965	0.69555	0.82227	0.995316	1.13537	1.47656	1.81219	2.23894	4.13201	7.63019	16.8452	28.794	33.4008	41.5015	49.9366
0.0846165	0.158758	0.206881	0.246094	0.302051	0.35848	0.40939	0.492188	0.564434	0.696058	0.831436	0.99826	1.13787	1.47656	1.81909	2.25021	4.1353	7.78629	17.009	28.813	33.6366	41.6556	50.5218
0.0847981	0.159021	0.206964	0.246094	0.303047	0.359702	0.409954	0.492487	0.564985	0.696058	0.837986	1.00023	1.15894	1.49693	1.8489	2.25082	4.16461	7.8006	17.019	28.8192	33.7803	41.7056	51.8658
0.0858664	0.159244	0.207668	0.246094	0.30312	0.360703	0.410106	0.497619	0.567486	0.696308	0.839496	1.0015	1.15982	1.49693	1.86298	2.25359	4.21245	7.93492	17.2353	28.944	34.05	41.7312	53.6157
0.0862731	0.160484	0.208501	0.246595	0.303346	0.361264	0.410909	0.499586	0.571453	0.696424	0.840659	1.00197	1.17635	1.49693	1.86567	2.26726	4.2273	7.94373	17.2598	29.2976	34.1047	41.9104	54.799
0.0865495	0.160811	0.20932	0.247308	0.303924	0.361614	0.411104	0.501122	0.572737	0.698495	0.843295	1.0026	1.17652	1.49693	1.87419	2.27166	4.30488	7.94391	17.4171	29.3224	34.3959	42.139	57.5041
0.0867952	0.163809	0.210384	0.248057	0.304085	0.362119	0.411853	0.502758	0.572931	0.699504	0.849681	1.005	1.18706	1.51806	1.87419	2.28856	4.34712	7.97304	17.5349	29.341	34.625	42.6463	57.723
0.0869718	0.163891	0.210623	0.248323	0.304537	0.362309	0.411911	0.504387	0.573796	0.700949	0.853772	1.00827	1.18919	1.52372	1.87419	2.29581	4.34729	8.03488	17.5832	29.4044	34.7395	42.74	58.0802
0.0875513	0.16401	0.212181	0.248948	0.306584	0.365608	0.413216	0.507751	0.578355	0.709863	0.85846	1.0084	1.18921	1.54872	1.91056	2.30078	4.39223	8.03488	17.5884	29.4141	34.8247	43.1173	59.738
0.0881665	0.164252	0.212323	0.250158	0.307165	0.365833	0.414132	0.511808	0.581579	0.710463	0.860569	1.01467	1.19622	1.55477	1.91387	2.30864	4.51926	8.11797	17.6125	29.5968	35.0273	43.1245	60.1837
0.0893332	0.165283	0.212784	0.25186	0.308233	0.367056	0.415217	0.512609	0.581882	0.722675	0.866089	1.01467	1.19903	1.55544	1.91639	2.32403	4.59741	8.12023	17.6176	29.7384	35.058	43.1776	62.0454
0.0901068	0.165721	0.21313	0.253046	0.308776	0.3675	0.415742	0.515375	0.585616	0.725591	0.867319	1.01467	1.22192	1.55643	1.91723	2.32841	4.62368	8.18096	17.8267	29.757	35.2591	43.9731	62.5238
0.0906618	0.166191	0.213732	0.253217	0.308932	0.36756	0.421373	0.518341	0.588113	0.728779	0.867642	1.01467	1.23047	1.55643	1.91975	2.33167	4.69009	8.23755	18.0506	29.8789	35.3588	44.0136	63.5055
0.0909109	0.166829	0.214526	0.253932	0.308962	0.368202	0.422776	0.51948	0.58946	0.729016	0.875732	1.01467	1.23047	1.55643	1.92775	2.33465	4.7979	8.25424	18.7786	30.0396	36.074	44.0155	63.9242
0.0910727	0.167394	0.215478	0.255067	0.311178	0.369411	0.424213	0.519505	0.589784	0.729779	0.877056	1.01467	1.23047	1.55643	1.93459	2.34617	4.85181	8.38244	19.0376	30.1452	36.1939	44.2873	64.4484
0.0914246	0.167473	0.215882	0.256114	0.311442	0.370388	0.425806	0.520623	0.590926	0.736482	0.881942	1.01467	1.23047	1.58691	1.95	2.37412	4.85373	8.4105	19.354	30.2735	36.2017	44.4107	64.4714
0.0915379	0.1676	0.218335	0.256621	0.311747	0.371856	0.426122	0.522469	0.598313	0.737152	0.883602	1.02614	1.23047	1.5943	1.95368	2.38689	4.87241	8.4177	19.3731	30.2975	37.2288	44.6981	64.8017
0.0916517	0.167792	0.218718	0.257318	0.31181	0.372559	0.428047	0.522531	0.59904	0.738281	0.883659	1.02949	1.25484	1.61889	1.95968	2.39228	4.88482	8.61813	19.433	30.3335	37.8765	44.7779	66.1905
0.0931468	0.167946	0.218895	0.258042	0.312321	0.373092	0.428221	0.523259	0.603389	0.738281	0.887304	1.03024	1.25484	1.61932	1.96421	2.44725	4.92802	8.66935	19.477	30.3883	37.8882	44.8018	66.6496
0.093179	0.168723	0.218979	0.258192	0.312602	0.375996	0.430948	0.52475	0.603562	0.738281	0.887304	1.03963	1.25484	1.63087	1.96968	2.48089	4.92802	8.80452	19.7901	30.3903	37.9663	45.2124	72.6513
0.0932297	0.168878	0.219117	0.260178	0.31269	0.376247	0.431724	0.525449	0.606468	0.738281	0.887304	1.04025	1.25484	1.63363	1.97478	2.50976	4.98302	8.83542	19.9246	30.5315	38.0832	45.6328	79.4132
0.0936083	0.168936	0.219719	0.260605	0.313658	0.376851	0.431894	0.525563	0.608665	0.738281	0.887304	1.04317	1.25484	1.63655	1.97488	2.52531	5.01935	8.89008	20.0183	30.5513	38.254	46.5825	85.4313
0.0936205	0.16999	0.220083	0.260814	0.313666	0.378126	0.431929	0.530439	0.611372	0.738281	0.888888	1.04371	1.25484	1.65085	1.98275	2.53369	5.17382	8.95795	20.0834	30.5989	38.3963	46.9702	91.3772
0.09364	0.170766	0.220438	0.262859	0.31488	0.37902	0.432828	0.533845	0.614658	0.738281	0.890142	1.04409	1.28922	1.65618	1.98859	2.53374	5.17449	9.11876	20.1512	30.7627	39.3049	47.1858	97.0817
0.0939563	0.17082	0.22188	0.264625	0.31747	0.382496	0.433586	0.536026	0.614679	0.73919	0.894201	1.04409	1.29984	1.67776	1.99446	2.54687	5.19135	9.3919	20.1602	30.8011	39.572	47.4141	100.963
0.0944016	0.170915	0.222264	0.264789	0.319493	0.384616	0.434931	0.537141	0.61604	0.739842	0.912932	1.04483	1.32113	1.68512	2.00693	2.55139	5.31197	9.5089	20.1932	31.0409	39.8953	47.4245
0.0952568	0.171178	0.2226	0.265334	0.320025	0.385135	0.436497	0.53852	0.617104	0.744677	0.92243	1.05123	1.32258	1.69078	2.0195	2.58247	5.31787	9.59644	20.2531	31.2229	39.9369	47.5122
0.0953102	0.172717	0.223417	0.267191	0.32132	0.386664	0.436896	0.539371	0.61735	0.745032	0.927012	1.05255	1.32526	1.69102	2.02083	2.65234	5.37477	9.80059	20.3213	31.3622	40.358	47.8872
0.0953633	0.172765	0.22344	0.270603	0.323096	0.386771	0.437769	0.542014	0.619085	0.748044	0.929923	1.05345	1.32763	1.69915	2.0214	2.67383	5.41965	9.96604	20.3994	31.5394	40.3691	48.8579
0.095508	0.174571	0.223984	0.273508	0.325184	0.389236	0.439975	0.542821	0.619253	0.749149	0.935593	1.06215	1.34743	1.71324	2.02818	2.72531	5.50282	9.97211	20.5084	31.5615	40.6143	49.0029
0.0956812	0.174584	0.224263	0.274951	0.325595	0.389627	0.440616	0.543175	0.623631	0.749209	0.936302	1.06328	1.36441	1.71811	2.04454	2.75141	5.53027	10.0988	20.6396	31.6381	40.8641	49.5219
0.095712	0.17481	0.224837	0.276715	0.325635	0.390021	0.441017	0.54347	0.623756	0.753587	0.946018	1.06563	1.38656	1.7218	2.04864	2.8606	5.57933	10.2683	20.7099	31.7337	41.0438	51.8574
0.0963571	0.174985	0.225074	0.276776	0.327362	0.390761	0.441524	0.54582	0.628188	0.753913	0.947047	1.06822	1.39078	1.72499	2.05032	2.93346	5.58425	10.277	20.7712	31.7623	41.2049	53.5026
0.0967631	0.175277	0.225711	0.277404	0.327497	0.392188	0.441903	0.545829	0.629071	0.758211	0.949279	1.0691	1.39212	1.74015	2.07016	3.00253	5.62051	10.2772	20.9398	31.8337	41.4091	54.6483
0.0970375	0.175287	0.225986	0.277729	0.328386	0.392217	0.441932	0.550282	0.630729	0.764377	0.950574	1.08595	1.40345	1.7462	2.07384	3.00643	5.72328	10.3301	21.0328	31.8788	41.6221	55.6205
0.0972802	0.176199	0.226125	0.278423	0.328412	0.392333	0.443718	0.550282	0.632925	0.769847	0.955348	1.09012	1.42219	1.75516	2.08196	3.07755	5.74512	10.5131	21.1955	31.9069	41.7697	56.805
0.0973936	0.17628	0.227145	0.279017	0.328925	0.393452	0.444031	0.550282	0.639485	0.772357	0.957582	1.09828	1.43496	1.77345	2.08201	3.11287	5.8186	10.7373	21.2159	32.0047	42.1295	57.0867
0.0974786	0.176939	0.229043	0.279117	0.330404	0.393465	0.445032	0.550282	0.642069	0.778217	0.970599	1.09914	1.43496	1.77461	2.08326	3.14186	5.85827	10.7861	21.2796	32.1319	42.1526	57.2193
0.0974951	0.177142	0.230774	0.280558	0.331345	0.39421	0.447242	0.550282	0.642136	0.778217	0.971959	1.10056	1.43496	1.77461	2.09588	3.23067	5.87025	10.7949	21.3768	32.2044	42.3348	57.8116
0.0975461	0.177865	0.231081	0.28179	0.332072	0.395713	0.447578	0.550282	0.642176	0.778217	0.973329	1.10056	1.44481	1.77461	2.10275	3.23686	5.9165	10.7974	21.4045	32.5943	42.4447	58.5005
0.0976488	0.178346	0.231608	0.28239	0.332369	0.396518	0.450656	0.550282	0.643258	0.781657	0.982643	1.10198	1.45407	1.78449	2.10866	3.23686	5.92517	10.8128	21.4554	32.6199	42.7919	59.9429
0.0979566	0.178577	0.232032	0.282441	0.335996	0.399504	0.451485	0.550282	0.645285	0.784377	0.983036	1.10275	1.45776	1.78908	2.10926	3.34855	5.92672	10.8235	21.5054	32.7896	42.9795	60.7792
0.0980168	0.178718	0.232717	0.282813	0.336121	0.400763	0.453352	0.550282	0.645315	0.786482	0.983905	1.1088	1.4659	1.79159	2.12704	3.39981	5.92683	10.8378	21.7893	32.8892	43.1691	61.119
0.098026	0.179369	0.233724	0.283901	0.336292	0.402604	0.456558	0.550282	0.647397	0.791858	0.984375	1.1201	1.46738	1.79159	2.12763	3.45409	6.03306	10.8405	21.9479	32.902	43.4543	61.3361
0.0985913	0.17978	0.236341	0.285905	0.336354	0.402929	0.457564	0.550329	0.651109	0.796178	0.984375	1.12415	1.47009	1.79264	2.13103	3.48029	6.08802	10.8585	21.978	33.4008	43.7379	61.3643
0.0990252	0.18011	0.236796	0.286947	0.336404	0.404399	0.458544	0.550676	0.652803	0.800009	0.984375	1.1244	1.47616	1.80393	2.13218	3.58728	6.11284	10.9974	22.014	33.8045	43.7492	61.6243
0.0991856	0.180195	0.236873	0.288729	0.33675	0.404406	0.462803	0.553387	0.654598	0.801882	0.984375	1.13242	1.47656	1.80819	2.14099	3.74492	6.15234	10.9974	22.0402	33.9964	44.3966	61.8768
0.0999289	0.180538	0.236924	0.289288	0.336887	0.404417	0.464551	0.555117	0.654662	0.802546	0.984375	1.13277	1.48549	1.81301	2.14555	3.76451	6.16483	11.105	22.069	34.1113	44.5942	62.9532
0.0999868	0.181311	0.237575	0.289457	0.33769	0.404577	0.465462	0.556518	0.655806	0.803459	0.984375	1.13845	1.48599	1.81685	2.1536	3.7771	6.22573	11.4025	22.1484	34.4578	44.6217	65.9021
0.100207	0.181394	0.238406	0.289841	0.338343	0.404797	0.468442	0.558202	0.659123	0.817854	0.985623	1.14047	1.49526	1.81893	2.17412	3.78731	6.22844	11.448	22.1876	34.7754	44.6881	68.5517
0.100285	0.181445	0.238918	0.290344	0.339119	0.405171	0.469027	0.559788	0.668424	0.826367	0.988652	1.16083	1.49693	1.82541	2.18755	3.79788	6.30308	11.5342	22.2729	35.0883	44.9588	74.5269
0.101207	0.181812	0.240045	0.290405	0.340441	0.405253	0.469381	0.563663	0.669404	0.826524	0.993448	1.16869	1.49693	1.8279	2.19208	3.82832	6.38354	11.543	22.3046	35.4248	45.0085	80.2355
0.10203	0.183168	0.240442	0.291305	0.341154	0.406667	0.469547	0.563671	0.66946	0.829528	0.995038	1.17609	1.50225	1.84263	2.19493	3.87539	6.38897	11.5534	22.3514	35.4856	45.2903	85.3997
0.102178	0.183209	0.242408	0.291687	0.342332	0.407617	0.470057	0.564646	0.674674	0.838645	0.995245	1.17742	1.51022	1.84728	2.20013	3.89185	6.45967	11.6283	22.3742	35.5473	45.3307	90.8143
0.10223	0.183291	0.243293	0.292853	0.342989	0.407957	0.470319	0.567676	0.676621	0.840379	0.998884	1.17875	1.51044	1.84751	2.21321	3.98852	6.49064	11.9151	22.4085	35.7658	45.4103	95.1343
0.102763	0.183546	0.24391	0.293329	0.344484	0.408324	0.472921	0.568994	0.679751	0.843295	1.00025	1.18455	1.51713	1.85119	2.21484	4.00612	6.59232	12.15	22.4607	35.8622	45.4382	97.6106
0.103014	0.183886	0.244789	0.29369	0.346404	0.409415	0.47314	0.569928	0.684347	0.854974	1.01007	1.18679	1.51797	1.85148	2.21767	4.01927	6.60339	12.1561	22.485	36.0956	46.8774
0.104359	0.184077	0.24558	0.294683	0.347115	0.411514	0.47359	0.57071	0.687182	0.856079	1.01053	1.19816	1.55421	1.8561	2.22528	4.09978	6.69447	12.2365	22.7005	36.6231	48.8455
0.104528	0.184179	0.245814	0.296906	0.347125	0.411581	0.474639	0.571723	0.691309	0.864091	1.01188	1.20456	1.55643	1.86276	2.22847	4.169	7.01001	12.2603	22.9051	36.9676	48.8742
0.104712	0.184358	0.246094	0.297002	0.347472	0.412489	0.474945	0.572076	0.696016	0.865734	1.01467	1.21187	1.55727	1.87419	2.24537	4.29877	7.10269	12.6955	22.9331	37.1753	49.4338
0.105248	0.184392	0.246094	0.297386	0.347473	0.413216	0.479276	0.573461	0.696058	0.866089	1.01467	1.23047	1.56403	1.87567	2.25755	4.30124	7.13672	12.7637	23.0065	37.3569	51.7087
0.105453	0.184951	0.246094	0.298782	0.347664	0.414919	0.479324	0.577592	0.696058	0.86775	1.01467	1.23047	1.57577	1.89184	2.26887	4.32393	7.1748	12.9174	23.1341	37.6244	53.2382
0.105876	0.185287	0.246094	0.298998	0.348029	0.416511	0.483011	0.578579	0.696058	0.86911	1.01467	1.23047	1.58411	1.90018	2.29811	4.35384	7.19423	12.9474	23.4218	37.9329	53.4986
0.106038	0.18558	0.246094	0.300853	0.348029	0.418675	0.487718	0.578987	0.696058	0.869704	1.01467	1.23047	1.58475	1.90359	2.30132	4.40226	7.29117	12.9521	23.4753	38.1434	54.3516
0.106318	0.185794	0.246094	0.301862	0.348029	0.418838	0.489294	0.580661	0.696058	0.872106	1.01467	1.23047	1.60134	1.90994	2.32383	4.478	7.3438	13.5419	23.7271	38.4594	54.3619
0.106651	0.186512	0.246094	0.30195	0.348029	0.421731	0.492188	0.580834	0.702718	0.87674	1.01467	1.2348	1.60163	1.91223	2.34455	4.52438	7.42812	13.7747	23.7318	38.817	54.7026
0.106754	0.186959	0.246094	0.304495	0.348029	0.422407	0.492188	0.581467	0.704153	0.88204	1.01467	1.23772	1.61078	1.91252	2.34758	4.53774	7.46606	13.9231	23.8762	39.0158	55.5698
0.106809	0.187136	0.246094	0.304683	0.348029	0.422626	0.492188	0.581929	0.704552	0.883407	1.0157	1.2392	1.61634	1.91861	2.38002	4.53774	7.50664	13.932	23.8825	39.384	56.3326
0.106944	0.187418	0.246094	0.304893	0.348029	0.423073	0.492188	0.586258	0.704596	0.887304	1.02074	1.25484	1.61887	1.91952	2.39201	4.53774	7.5546	14.0963	23.9128	39.5076	56.3979
0.107033	0.187542	0.246094	0.304974	0.348029	0.425806	0.494377	0.588125	0.709423	0.887304	1.02163	1.26164	1.62185	1.93579	2.41444	4.57761	7.57242	14.1712	24.1134	39.5249	57.1875
0.107325	0.187654	0.246094	0.30582	0.348029	0.42581	0.495184	0.589784	0.717205	0.887304	1.02708	1.2697	1.62926	1.9464	2.42701	4.60676	7.58362	14.2416	24.1247	39.526	57.2108
0.107369	0.188239	0.246094	0.307674	0.348029	0.429251	0.49753	0.589883	0.717883	0.887304	1.04282	1.2899	1.64253	1.95167	2.4607	4.64329	7.60403	14.3073	24.3699	39.598	57.6663
0.107542	0.188568	0.246094	0.308648	0.348029	0.429722	0.502776	0.590001	0.722848	0.890044	1.04409	1.30985	1.64416	1.9569	2.46094	4.66819	7.61963	14.4023	24.4365	39.8766	58.075
0.108362	0.189249	0.246094	0.309083	0.348197	0.432242	0.504796	0.590037	0.724544	0.891931	1.06105	1.32526	1.65085	1.9596	2.47321	4.73371	7.63948	14.5279	24.5206	39.9863	58.1516
0.108364	0.189852	0.246094	0.309415	0.348498	0.433312	0.506392	0.593044	0.727587	0.899102	1.06207	1.32526	1.65085	1.96916	2.54991	4.73371	7.64793	14.5757	24.716	40.2388	58.515
0.108697	0.189859	0.246094	0.312209	0.348706	0.433427	0.507862	0.594237	0.730402	0.901353	1.0768	1.32526	1.65692	1.9715	2.57589	4.77828	7.68775	14.6512	24.7321	40.6712	58.5584
0.109704	0.190647	0.246094	0.312372	0.349843	0.433586	0.508113	0.596585	0.736119	0.908791	1.08334	1.32526	1.66062	1.97339	2.57823	4.80164	7.68872	14.7841	24.7578	40.7375	59.8584
0.109735	0.191026	0.246094	0.313515	0.350502	0.434493	0.509793	0.598056	0.738121	0.909303	1.08956	1.32526	1.66881	1.97795	2.74633	4.87241	7.73226	14.8189	25.1317	40.774	61.1433
0.109982	0.191294	0.246094	0.316341	0.350519	0.436896	0.512983	0.600979	0.738281	0.915948	1.09025	1.32526	1.68243	1.97959	2.75141	4.88307	7.77693	14.902	25.204	41.0082	64.8292
0.110083	0.191603	0.246094	0.316776	0.350662	0.437031	0.52091	0.603126	0.738281	0.919881	1.09818	1.3477	1.68322	1.98382	2.76349	4.93973	7.81711	14.9491	25.2531	41.0811	65.3
0.110252	0.192238	0.246094	0.316894	0.352643	0.437262	0.521468	0.604895	0.738281	0.92007	1.10056	1.34969	1.68784	1.98407	2.78423	4.96306	7.8503	15.044	25.3489	41.4099	70.3724
0.110388	0.192383	0.246094	0.317198	0.353699	0.439996	0.522633	0.606758	0.738281	0.928071	1.10056	1.35226	1.70176	1.98834	2.79812	5.00837	7.87884	15.1623	25.3584	41.4731	75.2314
0.110539	0.193283	0.246094	0.317292	0.357085	0.441882	0.523773	0.60946	0.739316	0.937406	1.10056	1.35405	1.70743	1.9901	2.80363	5.06738	7.88509	15.2201	25.8311	41.6302	80.0444
0.1108	0.193375	0.246094	0.31792	0.3595	0.442144	0.52804	0.613872	0.740847	0.940752	1.10056	1.3559	1.70769	1.99021	2.8059	5.07335	8.04432	15.3488	25.8504	41.6951	84.7714
0.111145	0.193444	0.246094	0.318034	0.359805	0.443386	0.528444	0.614594	0.750159	0.944451	1.10056	1.36994	1.71346	1.99206	2.81924	5.10594	8.15458	15.4137	25.9813	41.7912	88.9178
0.111504	0.193821	0.246094	0.319218	0.361187	0.443457	0.531428	0.617346	0.764286	0.950657	1.10056	1.37632	1.71627	2.00166	2.88045	5.17382	8.18054	15.5907	26.1231	41.8924	91.8259
0.112128	0.19449	0.246094	0.319521	0.361264	0.443718	0.533537	0.621984	0.767078	0.957051	1.10111	1.38014	1.72156	2.00522	2.95312	5.17382	8.19533	15.6516	26.2018	42.023	93.9964
0.112298	0.194549	0.246094	0.322632	0.361997	0.447302	0.534039	0.622165	0.774468	0.95782	1.1192	1.38032	1.72567	2.00529	2.95891	5.17382	8.1995	15.9809	26.4055	42.4044
0.113149	0.194949	0.246094	0.323335	0.362566	0.447389	0.535797	0.623196	0.778217	0.959619	1.12039	1.38441	1.73408	2.0123	2.96336	5.19431	8.27565	15.9915	26.4468	42.432
0.113297	0.196583	0.246094	0.324486	0.363979	0.448246	0.539266	0.623612	0.778217	0.961064	1.12326	1.38698	1.7344	2.0203	2.99386	5.20774	8.30179	16.0131	26.4651	42.4893
0.114067	0.198493	0.246094	0.324639	0.365332	0.449676	0.540145	0.623631	0.778217	0.966679	1.13368	1.38768	1.74015	2.0229	3.07879	5.31521	8.3997	16.1243	26.4868	42.5893
0.114346	0.198764	0.246469	0.325863	0.367506	0.451013	0.541332	0.629164	0.778217	0.966733	1.13736	1.39058	1.7402	2.02934	3.09505	5.39964	8.4177	16.2559	26.4871	42.9291
0.114528	0.199423	0.246998	0.328419	0.367555	0.451613	0.541864	0.632089	0.778217	0.969293	1.14202	1.39296	1.75027	2.03123	3.1119	5.41406	8.49022	16.4276	26.5655	43.043
0.114609	0.19948	0.247476	0.330728	0.368372	0.452497	0.542014	0.633851	0.78383	0.971423	1.1443	1.40103	1.75168	2.04919	3.11287	5.41992	8.57565	16.4515	26.5963	43.0876
0.114987	0.200253	0.248323	0.331122	0.368953	0.456996	0.54347	0.639467	0.78588	0.973089	1.14685	1.41738	1.76562	2.05151	3.15857	5.53027	8.64136	16.6159	26.8005	43.4286
0.116153	0.200364	0.248552	0.332886	0.369392	0.457228	0.546054	0.642262	0.793314	0.978385	1.14959	1.42846	1.77161	2.07368	3.1601	5.55213	8.89008	16.7513	27.0143	43.7711
0.116349	0.200928	0.249269	0.333253	0.369797	0.458386	0.547785	0.646508	0.794427	0.978626	1.15892	1.43496	1.77302	2.08853	3.24712	5.55888	8.89349	16.9099	27.03	44.249
0.116475	0.200944	0.249368	0.335158	0.370146	0.461852	0.547877	0.64715	0.795423	0.978727	1.16033	1.43496	1.77461	2.09653	3.30169	5.57933	8.90272	16.9862	27.1574	44.4093
0.116546	0.201293	0.249417	0.335842	0.370388	0.463256	0.54931	0.65365	0.795482	0.984375	1.16216	1.43496	1.77461	2.10263	3.34724	5.6118	8.91729	17.1384	27.2089	45.2732
0.116607	0.202786	0.24979	0.336374	0.370876	0.464999	0.549881	0.660199	0.798169	0.984375	1.16504	1.43496	1.77461	2.10263	3.3742	5.61719	8.95029	17.2072	27.3264	46.7251
0.116711	0.203124	0.252193	0.33793	0.371835	0.467508	0.550282	0.667162	0.800986	0.984375	1.1686	1.43504	1.77801	2.10397	3.37463	5.7081	8.95795	17.5574	27.3341	48.5971
0.116721	0.204508	0.252907	0.338382	0.374476	0.467622	0.550282	0.668424	0.803583	0.984375	1.17771	1.44082	1.78252	2.11874	3.40669	5.82524	9.07883	17.6811	27.3441	48.699
0.117101	0.204922	0.253125	0.338884	0.375349	0.468322	0.550282	0.66956	0.804488	0.984375	1.17844	1.44143	1.78735	2.12049	3.52353	5.85799	9.13535	17.7232	27.3563	49.5854
0.117165	0.205032	0.253588	0.340786	0.376539	0.468442	0.550282	0.672134	0.808207	0.984375	1.18127	1.4461	1.79159	2.17151	3.54379	5.87025	9.24736	17.7256	27.3563	50.8232
0.117309	0.205661	0.253675	0.34119	0.377692	0.469803	0.550282	0.673518	0.81588	0.985623	1.18136	1.46232	1.79159	2.1766	3.55839	5.92672	9.26372	17.7594	27.5592	51.4204
0.117311	0.205965	0.254405	0.341333	0.378455	0.470194	0.550282	0.675546	0.817854	1.00189	1.18513	1.46443	1.80391	2.20113	3.58318	5.95221	9.27235	17.7687	27.5636	52.6301
0.117383	0.206149	0.254555	0.341807	0.379487	0.474082	0.550282	0.676621	0.819589	1.00222	1.18673	1.47656	1.80836	2.20342	3.6338	5.95647	9.28658	17.9884	27.5801	53.4301
0.117599	0.206415	0.255692	0.34275	0.380743	0.475788	0.550282	0.680165	0.830584	1.00658	1.18712	1.47656	1.81029	2.20653	3.65845	6.02284	9.50572	17.9918	27.5872	53.467
0.117876	0.206618	0.256775	0.345006	0.381126	0.479599	0.550282	0.681093	0.832574	1.00859	1.19407	1.47713	1.81278	2.22231	3.7047	6.02506	9.55655	18.1677	27.602	53.4675
0.117906	0.207246	0.256966	0.3454	0.38117	0.47984	0.550873	0.68145	0.833829	1.01252	1.19432	1.48214	1.81543	2.22847	3.74839	6.03591	9.57555	18.2176	27.6156	53.4675
0.118446	0.208293	0.259044	0.346104	0.381217	0.482911	0.553751	0.68297	0.837452	1.01467	1.19507	1.48324	1.82688	2.24552	3.74839	6.09299	9.6112	18.6318	27.6327	53.5524
0.118519	0.209017	0.260096	0.348029	0.381241	0.484989	0.554404	0.683087	0.839039	1.01467	1.19902	1.48455	1.86634	2.25337	3.74863	6.10162	9.65609	18.7205	27.6509	53.6603
0.118842	0.209284	0.26077	0.348029	0.382117	0.485819	0.55535	0.684485	0.841052	1.01467	1.23047	1.48779	1.86896	2.25653	3.79475	6.11284	9.68559	18.7487	27.7203	54.0987
0.118972	0.209606	0.260801	0.348029	0.383583	0.48665	0.555962	0.691784	0.842506	1.01467	1.23047	1.49693	1.87151	2.25996	3.82832	6.15234	9.75103	18.827	27.851	54.4752
0.11982	0.209769	0.261823	0.348029	0.386917	0.488143	0.561978	0.693685	0.84443	1.01467	1.23047	1.49693	1.87419	2.26887	3.83825	6.15234	9.89094	19.0512	27.8619	54.9315
0.119839	0.210088	0.261999	0.348029	0.386984	0.492188	0.563268	0.696058	0.852305	1.01467	1.23047	1.49693	1.87419	2.26887	3.87204	6.16328	9.97211	19.1486	27.965	55.0398
0.120075	0.21159	0.262066	0.348029	0.388145	0.492188	0.563392	0.696058	0.852801	1.01467	1.23047	1.49693	1.87419	2.28277	3.89836	6.2306	10.0715	19.2521	28.0169	55.2112
0.120248	0.212435	0.262765	0.348029	0.389627	0.492188	0.563477	0.696058	0.864955	1.01467	1.23047	1.50177	1.87428	2.33138	3.96814	6.25368	10.3409	19.2677	28.0353	55.5147
0.120306	0.212619	0.262859	0.348029	0.391877	0.492856	0.56482	0.696058	0.866279	1.01467	1.23047	1.50243	1.88873	2.34805	3.97515	6.30308	10.3506	19.3423	28.0644	55.7091
0.120341	0.213224	0.262882	0.348029	0.392333	0.495439	0.567633	0.703119	0.868797	1.01932	1.23047	1.50257	1.89167	2.37623	4.07086	6.5302	10.4085	19.3631	28.4204	56.2707
0.120376	0.213284	0.263373	0.348029	0.392525	0.499739	0.572959	0.704552	0.870858	1.01932	1.23047	1.50814	1.8962	2.40867	4.1409	6.56161	10.4467	19.4079	28.4584	56.4864
0.121217	0.213354	0.264433	0.348029	0.39362	0.502651	0.57335	0.704596	0.879069	1.02161	1.23047	1.5364	1.90344	2.4362	4.19083	6.57184	10.5251	19.5176	28.734	60.0912
0.122285	0.214315	0.265334	0.348029	0.396033	0.504616	0.57628	0.704832	0.881761	1.02321	1.23047	1.54796	1.90708	2.44549	4.24735	6.62404	10.6066	19.5528	28.794	62.1996
0.122313	0.215041	0.265827	0.348029	0.396999	0.506019	0.576572	0.71295	0.882793	1.02569	1.23047	1.55643	1.91219	2.49095	4.28013	6.63677	10.6314	19.6339	28.8045	63.8541
0.122387	0.215489	0.265893	0.348029	0.397201	0.507595	0.578579	0.717965	0.884153	1.0277	1.24696	1.55643	1.92205	2.55308	4.28307	6.65699	10.6936	19.7368	28.8365	67.0753
0.122842	0.215554	0.266812	0.348029	0.400083	0.507968	0.580358	0.719952	0.884556	1.03404	1.25382	1.55643	1.92805	2.6104	4.36533	6.66908	10.7375	19.7619	28.8948	70.9992
0.123362	0.21567	0.267325	0.348029	0.400626	0.509702	0.58281	0.723243	0.884744	1.04208	1.25484	1.56809	1.92932	2.61377	4.38157	6.69986	10.7413	19.7704	29.0742	74.9116
0.123423	0.215734	0.268098	0.348029	0.402209	0.513289	0.586258	0.725129	0.886105	1.04286	1.25484	1.57254	1.93551	2.62921	4.40226	6.7201	10.7439	19.7715	29.0766	79.2567
0.12346	0.215792	0.268562	0.348029	0.403228	0.513292	0.592275	0.728018	0.887304	1.04409	1.25484	1.57399	1.93748	2.7254	4.43652	6.76648	10.7827	19.8533	29.1057	82.839
0.123654	0.216311	0.268684	0.348029	0.40436	0.51459	0.594237	0.732086	0.887304	1.04539	1.25484	1.57577	1.94089	2.75141	4.43652	6.80662	10.7922	19.9254	29.2531	85.6414
0.123743	0.216571	0.269804	0.348029	0.404406	0.515928	0.600541	0.736067	0.887304	1.04687	1.25484	1.57577	1.95098	2.79384	4.44235	6.84211	10.9219	19.9321	29.3224	88.2256
0.124127	0.216768	0.270191	0.349228	0.404752	0.520698	0.600639	0.737935	0.887304	1.04723	1.25658	1.5831	1.95706	2.82217	4.44402	6.8723	10.9643	20.0563	29.5429	89.5348
0.124844	0.216824	0.270322	0.350664	0.405099	0.521696	0.60177	0.738281	0.887304	1.04868	1.27246	1.6018	1.96109	2.82491	4.45271	6.94616	10.9753	20.0563	29.6132
0.124855	0.217657	0.270703	0.351206	0.406003	0.5311	0.60221	0.738281	0.887304	1.05075	1.27384	1.60341	1.96217	2.90902	4.5125	7.02131	11.0716	20.2486	29.6551
0.124896	0.218434	0.270997	0.352329	0.407564	0.532091	0.603348	0.738281	0.887304	1.05253	1.2798	1.61794	1.96814	2.95697	4.51768	7.04705	11.0813	20.3213	29.7814
0.124973	0.219874	0.271421	0.35511	0.409423	0.533232	0.603616	0.739314	0.887304	1.05262	1.29846	1.62372	1.97325	2.96336	4.57761	7.16193	11.121	20.5163	29.7936
0.125216	0.220423	0.272449	0.356498	0.410767	0.533496	0.607217	0.740456	0.887304	1.05462	1.29894	1.62412	1.97824	2.96336	4.58975	7.16636	11.2173	20.5519	29.8505
0.125439	0.221056	0.272605	0.356687	0.411283	0.536396	0.607727	0.743641	0.887304	1.06635	1.29931	1.63086	1.98334	2.96336	4.59741	7.1699	11.2255	20.5546	29.8839
0.125649	0.221111	0.272796	0.356728	0.411489	0.53705	0.611404	0.745231	0.887304	1.07699	1.30062	1.64334	1.98407	2.97356	4.61909	7.17305	11.3553	20.5692	29.9612
0.125808	0.222	0.274108	0.357161	0.412031	0.53747	0.612454	0.745977	0.887304	1.07928	1.30285	1.65085	1.99232	3.03516	4.64329	7.23842	11.4768	20.6123	29.9841
0.125814	0.2221	0.274867	0.357874	0.413404	0.5378	0.612728	0.747576	0.887304	1.07958	1.31196	1.65085	1.99321	3.0426	4.67578	7.29018	11.5978	20.6262	30.0527
0.126139	0.22257	0.278353	0.359172	0.41399	0.5391	0.613872	0.748067	0.895066	1.09041	1.31722	1.65085	1.99385	3.04401	4.69412	7.34168	11.6415	20.8178	30.3055
0.126222	0.224586	0.279272	0.361264	0.416372	0.540108	0.616342	0.753495	0.895339	1.09544	1.32526	1.65085	2.01286	3.05814	4.73371	7.3992	11.7328	20.8972	30.3505
0.12657	0.225321	0.279493	0.363649	0.417046	0.541652	0.616406	0.761371	0.89704	1.09645	1.32526	1.66696	2.0173	3.06784	4.76161	7.41794	11.8173	20.9411	30.4292
0.126599	0.226315	0.280727	0.365054	0.417607	0.543363	0.61724	0.763476	0.897296	1.09993	1.32526	1.66793	2.02934	3.07887	4.85373	7.44001	11.8864	20.9613	30.456
0.126636	0.227616	0.280919	0.365248	0.417994	0.550282	0.617852	0.768262	0.903424	1.10056	1.32526	1.67418	2.04172	3.08355	4.88825	7.44028	12.2009	20.9796	30.457
0.126678	0.227828	0.2819	0.366929	0.420393	0.550282	0.622165	0.768509	0.908056	1.10056	1.33321	1.69962	2.04271	3.1247	4.93465	7.4725	12.2207	21.0104	30.9384
0.126804	0.22847	0.283145	0.367651	0.420655	0.550282	0.623176	0.773204	0.909549	1.10056	1.33482	1.71002	2.06788	3.13476	4.94642	7.56605	12.2406	21.0263	31.018
0.126995	0.228823	0.283673	0.369211	0.42253	0.550282	0.627291	0.778217	0.90981	1.10056	1.34661	1.72596	2.07252	3.16442	4.9928	7.5991	12.2998	21.0622	31.3927
0.127759	0.230638	0.283834	0.3696	0.423443	0.550282	0.627791	0.778217	0.912166	1.10584	1.34792	1.72668	2.10263	3.17912	5.06157	7.71929	12.3587	21.3081	31.4779
0.127762	0.233604	0.287032	0.370041	0.424342	0.550282	0.62808	0.778217	0.912398	1.10655	1.34919	1.7283	2.10487	3.20867	5.06738	7.72358	12.3761	21.4793	31.5346
0.127784	0.233904	0.288168	0.370087	0.424829	0.550282	0.630605	0.778217	0.913603	1.11736	1.35239	1.7294	2.11698	3.21123	5.07335	7.76426	12.4149	21.5451	31.6353
0.12785	0.234005	0.289713	0.370192	0.425806	0.550282	0.631198	0.778217	0.915896	1.12015	1.35535	1.74015	2.123	3.21581	5.07335	7.76833	12.6852	21.6633	31.6381
0.128241	0.234095	0.289922	0.370388	0.42581	0.550282	0.631643	0.778217	0.920064	1.12416	1.36124	1.74015	2.13105	3.24814	5.07335	7.77049	12.804	21.6912	31.6513
0.128945	0.23497	0.290952	0.370732	0.430882	0.550282	0.631906	0.787423	0.927184	1.13242	1.36322	1.74828	2.13874	3.26168	5.08273	7.78056	12.8884	21.8038	31.8185
0.129255	0.235568	0.291117	0.372995	0.431957	0.550282	0.633842	0.787798	0.927549	1.13244	1.3754	1.75131	2.14527	3.2833	5.08971	7.78077	12.9146	21.8975	31.8799
0.129303	0.235873	0.293453	0.378383	0.432335	0.550282	0.639677	0.790645	0.928839	1.13435	1.39212	1.75312	2.15155	3.29951	5.13278	7.81711	13.1009	21.9982	31.9039
0.129424	0.235978	0.294109	0.380223	0.433305	0.550282	0.64852	0.791499	0.929064	1.14117	1.39212	1.75677	2.19132	3.30327	5.14603	7.82098	13.2008	22.1498	32.3897
0.129894	0.236252	0.294466	0.383743	0.436084	0.550282	0.659408	0.79171	0.932692	1.1543	1.39212	1.7575	2.19165	3.33397	5.17464	7.82354	13.2302	22.2369	32.5128
0.129902	0.236714	0.295387	0.383804	0.436464	0.550282	0.667458	0.796106	0.935765	1.167	1.39495	1.76235	2.20113	3.36507	5.27596	7.82583	13.3149	22.3169	32.5412
0.130005	0.236862	0.296277	0.386337	0.438745	0.550282	0.669087	0.796209	0.938032	1.18224	1.42714	1.76629	2.22311	3.37745	5.32382	7.83259	13.3889	22.3305	32.544
0.130814	0.237728	0.29666	0.386541	0.441297	0.552475	0.669972	0.79788	0.942232	1.18505	1.43496	1.76767	2.22847	3.42856	5.32537	7.84679	13.4634	22.4108	32.8864
0.131247	0.237791	0.296787	0.387581	0.442679	0.553387	0.670581	0.798141	0.943351	1.19515	1.43496	1.77461	2.22847	3.43288	5.39726	7.85957	13.6443	22.4472	33.0875
0.131311	0.238147	0.296891	0.39059	0.443718	0.553981	0.674935	0.801904	0.945302	1.20293	1.45232	1.78037	2.23737	3.45869	5.39726	7.86781	13.932	22.4593	33.4088
0.132322	0.238248	0.297813	0.390939	0.447185	0.555669	0.675289	0.802456	0.947459	1.20385	1.45755	1.7864	2.25512	3.47061	5.39936	7.87884	13.9545	22.4696	33.5672
0.132745	0.23872	0.298034	0.391732	0.447555	0.556086	0.676621	0.804104	0.954154	1.20407	1.46392	1.78761	2.26887	3.50749	5.40286	7.94677	14.068	22.5345	33.6591
0.132772	0.238919	0.300055	0.392134	0.449676	0.559421	0.677797	0.804782	0.954374	1.20579	1.47375	1.79094	2.26887	3.52353	5.43715	7.97055	14.2461	22.662	33.7016
0.133139	0.23993	0.303232	0.39311	0.449676	0.564066	0.677968	0.809154	0.955065	1.20751	1.47656	1.7978	2.28081	3.66644	5.5114	7.97412	14.2671	22.7649	33.9569
0.133397	0.240021	0.303474	0.393937	0.449676	0.564568	0.679181	0.821766	0.955909	1.2081	1.47656	1.80203	2.29464	3.69141	5.55213	8.03488	14.3348	22.8804	34.3853
0.133639	0.240379	0.305815	0.394202	0.451578	0.567666	0.681275	0.825936	0.967014	1.21229	1.49693	1.80997	2.30105	3.69141	5.57933	8.06121	14.3496	22.9132	34.4144
0.134251	0.240765	0.308031	0.394946	0.452396	0.570199	0.681421	0.826597	0.972735	1.2133	1.50149	1.81145	2.31993	3.73705	5.57933	8.07022	14.377	22.9814	34.5387
0.134583	0.242131	0.308194	0.395466	0.453874	0.571122	0.683016	0.830427	0.974023	1.22807	1.50819	1.81676	2.33465	3.74839	5.6118	8.07248	14.4443	23.1341	34.6048
0.134625	0.242551	0.309254	0.397904	0.455716	0.571359	0.686099	0.831119	0.97666	1.22854	1.5152	1.81751	2.34312	3.76451	5.6118	8.11736	14.484	23.2907	34.6652
0.134664	0.242852	0.309884	0.400613	0.456035	0.571832	0.690533	0.832454	0.977124	1.23047	1.55007	1.83395	2.37862	3.81925	5.62258	8.13997	14.5216	23.4113	34.8162
0.135236	0.243293	0.310149	0.401763	0.456807	0.582917	0.696058	0.832707	0.978009	1.23047	1.55016	1.86405	2.40677	3.89108	5.65833	8.21746	14.6214	23.6772	35.1923
0.136213	0.243557	0.310157	0.402516	0.458224	0.584386	0.696058	0.835446	0.980789	1.23047	1.55555	1.8791	2.40911	3.97186	5.6655	8.35632	14.6214	23.689	35.2715
0.137482	0.243562	0.310861	0.403365	0.459075	0.587366	0.696058	0.836996	0.982661	1.23047	1.55586	1.88213	2.42135	3.97926	5.72435	8.3997	14.6589	23.7957	35.3516
0.137534	0.243892	0.310954	0.403741	0.460742	0.58747	0.696058	0.841088	0.984375	1.23047	1.55643	1.88219	2.4266	4.03624	5.82232	8.40971	14.8168	23.8724	35.5477
0.137587	0.244073	0.311377	0.404406	0.463139	0.590247	0.696058	0.844422	0.984375	1.23047	1.55643	1.88468	2.49153	4.09582	5.85714	8.4177	14.9227	23.937	35.5714
0.137737	0.244149	0.312052	0.404731	0.465513	0.592591	0.696058	0.845387	0.984375	1.23047	1.56575	1.88558	2.49765	4.09582	5.87735	8.42955	15.1052	24.0165	35.6251
0.137791	0.2442	0.313564	0.405077	0.465591	0.592735	0.698997	0.845572	0.985419	1.23413	1.57577	1.89295	2.55054	4.10474	5.9019	8.46791	15.3449	24.0207	35.7578
0.137799	0.244614	0.31412	0.405402	0.467376	0.593397	0.699876	0.849581	0.992615	1.23988	1.57577	1.89545	2.56929	4.11439	5.97767	8.48208	15.3527	24.0259	35.9297
0.138171	0.2451	0.314907	0.405698	0.467834	0.598638	0.702041	0.852293	0.995899	1.2447	1.57577	1.89621	2.61881	4.1379	6.00279	8.71491	15.4122	24.0372	35.9642
0.139883	0.246094	0.316512	0.406109	0.46792	0.60056	0.70329	0.852305	0.99785	1.25473	1.57967	1.9091	2.66078	4.2277	6.00791	8.78838	15.4158	24.0543	36.3428
0.139994	0.246094	0.317858	0.406215	0.4698	0.602302	0.704552	0.852666	0.998807	1.25484	1.58849	1.91597	2.66191	4.23055	6.02589	8.91729	15.455	24.2187	36.4767
0.140563	0.246094	0.319218	0.408237	0.470246	0.604877	0.704596	0.854309	1.00899	1.25484	1.58935	1.93171	2.6713	4.23396	6.0366	8.92069	15.6146	24.2917	36.6477
0.140994	0.246094	0.322748	0.408395	0.471643	0.605425	0.711891	0.858188	1.00904	1.25484	1.59109	1.93516	2.70722	4.27077	6.04972	8.95795	15.6733	24.2972	36.8468
0.140998	0.246094	0.323578	0.409179	0.473196	0.607701	0.712629	0.862624	1.01467	1.25484	1.59158	1.93876	2.7213	4.28196	6.07089	8.95795	15.7577	24.3633	36.9537
0.141808	0.246094	0.324377	0.410656	0.476292	0.608062	0.713995	0.863793	1.01467	1.25484	1.59592	1.9465	2.74464	4.29363	6.0878	9.01912	15.8047	24.4241	36.9861
0.142371	0.246094	0.327894	0.411293	0.477412	0.609565	0.714699	0.865519	1.01467	1.26379	1.59619	1.95205	2.75141	4.29784	6.10123	9.07549	16.02	24.4873	37.1059
0.142425	0.246094	0.328906	0.411374	0.481551	0.60987	0.717744	0.872542	1.01467	1.26772	1.60727	1.95388	2.75141	4.39424	6.11284	9.19482	16.0262	24.5169	37.727
0.142754	0.246094	0.329035	0.413024	0.482456	0.610883	0.717816	0.876123	1.01467	1.27833	1.60888	1.97689	2.75141	4.40344	6.12132	9.27679	16.0641	24.6143	37.8706
0.143137	0.246094	0.330084	0.413216	0.483929	0.611279	0.718657	0.877108	1.01467	1.29284	1.60938	1.98407	2.79169	4.43652	6.16522	9.27697	16.1721	24.735	37.9883
0.143789	0.246094	0.331623	0.413698	0.484317	0.611724	0.724591	0.880814	1.01467	1.29444	1.61144	1.98407	2.85459	4.43652	6.16986	9.31588	16.5122	24.7633	38.1255
0.144737	0.246094	0.33276	0.414229	0.487615	0.61204	0.725358	0.887304	1.01467	1.29563	1.61349	1.98495	2.86992	4.43652	6.17558	9.41932	16.5176	24.7981	38.2134
0.145803	0.246094	0.334927	0.415742	0.488123	0.6121	0.726936	0.887304	1.0242	1.32526	1.61407	2.01303	2.9139	4.44837	6.2306	9.47252	16.6144	24.875	38.2756
0.147091	0.246094	0.335086	0.417596	0.489585	0.612454	0.727489	0.887304	1.02504	1.32526	1.62121	2.01739	2.91566	4.49079	6.25228	9.55313	16.7796	25.0049	38.3833
0.14711	0.246094	0.336499	0.421695	0.491092	0.615444	0.73063	0.887304	1.03323	1.32526	1.62368	2.02072	2.92463	4.51167	6.28415	9.69809	16.8155	25.2986	38.4008
0.147169	0.246094	0.336525	0.424488	0.491556	0.615783	0.733038	0.887304	1.03616	1.32526	1.63269	2.02192	3.01104	4.51768	6.2879	9.71262	16.8293	25.3775	38.4766
0.14726	0.246094	0.337453	0.425221	0.492188	0.617149	0.733594	0.887304	1.04063	1.32526	1.63365	2.02335	3.02401	4.51768	6.32705	9.72301	16.8354	25.4006	38.7454
0.147577	0.246094	0.337598	0.42581	0.492188	0.620292	0.733699	0.887304	1.04409	1.32526	1.63655	2.02934	3.07885	4.51768	6.33101	9.73549	16.9018	25.4573	39.0239
0.147647	0.246094	0.33793	0.427186	0.492188	0.621008	0.736961	0.887304	1.04554	1.33048	1.63852	2.03586	3.08478	4.54288	6.41434	9.85885	16.9929	25.6127	39.1359
0.148012	0.246094	0.338047	0.427941	0.492188	0.621485	0.738173	0.887304	1.06091	1.33953	1.63937	2.04812	3.09032	4.57761	6.49706	9.87473	17.5116	25.6127	39.3353
0.148093	0.246094	0.33843	0.428205	0.492188	0.622165	0.738281	0.887304	1.077	1.34783	1.64525	2.06538	3.09518	4.57761	6.49706	9.92878	17.5399	25.6694	39.3551
0.148203	0.246094	0.338431	0.428348	0.492188	0.622434	0.738281	0.888273	1.08589	1.35078	1.64565	2.09561	3.09606	4.62368	6.5043	10.0206	17.549	25.6894	39.4213
0.148382	0.246094	0.338464	0.42877	0.492188	0.624664	0.738281	0.896367	1.09018	1.36458	1.64669	2.1002	3.12659	4.64019	6.5666	10.1168	17.7631	25.8398	39.4968
0.148726	0.246094	0.339419	0.432638	0.492188	0.624998	0.738281	0.896584	1.09476	1.37536	1.65286	2.10263	3.12678	4.64329	6.57249	10.2092	17.8091	25.8655	39.6369
0.148762	0.246094	0.339602	0.432986	0.492188	0.625407	0.738281	0.898433	1.10056	1.38143	1.65966	2.10263	3.1381	4.64329	6.63701	10.2702	17.902	25.8972	39.7355
0.148911	0.246094	0.343196	0.435689	0.492188	0.627275	0.738281	0.903151	1.10056	1.39212	1.66119	2.10263	3.14175	4.64329	6.66537	10.3341	17.9514	25.9732	39.7744
0.150309	0.246094	0.343706	0.436058	0.493594	0.627933	0.738281	0.903159	1.10056	1.3931	1.66269	2.12779	3.15154	4.6693	6.69447	10.3476	17.9716	26.0818	39.8223
0.150537	0.246094	0.343767	0.43657	0.496129	0.627966	0.738281	0.903205	1.10056	1.40854	1.67408	2.13167	3.19415	4.68205	6.70046	10.3506	17.9932	26.0871	40.0664
0.150625	0.246094	0.347179	0.43745	0.499174	0.630758	0.740782	0.908063	1.10056	1.41184	1.67446	2.13193	3.19922	4.72185	6.73521	10.3518	18.0328	26.0964	40.1264
0.151429	0.246094	0.348029	0.437473	0.500885	0.630763	0.74243	0.911536	1.10217	1.41443	1.68503	2.13708	3.21746	4.73371	6.81664	10.3861	18.107	26.1045	40.2907
0.151437	0.246094	0.348029	0.43799	0.501041	0.631473	0.742675	0.91511	1.10331	1.42038	1.69294	2.16273	3.21882	4.73371	6.82439	10.5639	18.1284	26.1277	40.4318
0.151798	0.246094	0.348029	0.440238	0.503492	0.633412	0.743602	0.917126	1.1086	1.42661	1.69343	2.17463	3.2833	4.74235	6.83229	10.5738	18.2644	26.1277	40.4767
0.151988	0.246094	0.348029	0.440471	0.504148	0.636263	0.746745	0.920083	1.11357	1.43213	1.69529	2.18036	3.32333	4.75286	6.89062	10.5849	18.369	26.1856	40.6904
0.153222	0.246094	0.348029	0.440498	0.50627	0.637581	0.749637	0.923002	1.11509	1.43444	1.69646	2.201	3.33257	4.85373	6.97312	10.6421	18.3724	26.2156	40.7043
0.153875	0.246094	0.348029	0.441717	0.510939	0.638086	0.750001	0.928882	1.11831	1.43496	1.69683	2.20113	3.34349	4.85373	6.99963	10.6817	18.459	26.3504	40.7677
0.154325	0.246094	0.348029	0.441762	0.51426	0.63857	0.750777	0.929986	1.14041	1.43496	1.70148	2.21484	3.34724	4.90338	7.00412	10.8057	18.4718	26.4055	40.9196
0.154343	0.246094	0.348029	0.442014	0.514779	0.640259	0.753323	0.931856	1.14346	1.43496	1.70584	2.21839	3.34724	4.92791	7.03235	10.8585	18.5894	26.4802	41.3522
0.154612	0.246094	0.348029	0.442915	0.515004	0.641023	0.760625	0.932006	1.14842	1.43496	1.72266	2.2371	3.34917	4.96267	7.03845	10.9517	18.6025	26.553	41.371
0.154807	0.246094	0.348029	0.444347	0.515553	0.642509	0.761202	0.932813	1.15202	1.43496	1.72266	2.26887	3.34952	4.97694	7.05135	10.9986	18.6118	26.5622	41.5106
0.155298	0.246094	0.348029	0.444642	0.518038	0.643372	0.762317	0.935966	1.16418	1.43496	1.72484	2.26887	3.38513	5.07335	7.06065	11.0056	18.6618	26.5884	41.6728
0.15534	0.246094	0.348029	0.445198	0.518274	0.643798	0.763847	0.938537	1.16696	1.43496	1.72938	2.272	3.42769	5.07335	7.10269	11.0352	18.7031	26.6202	41.7872
0.155356	0.246094	0.348029	0.447619	0.518301	0.647326	0.764002	0.953391	1.17276	1.44327	1.72989	2.27938	3.48002	5.09728	7.17323	11.0712	18.7471	26.6419	41.8409
0.156015	0.246094	0.348029	0.448954	0.518687	0.64864	0.765536	0.957899	1.17692	1.45039	1.73056	2.29702	3.48433	5.15623	7.23783	11.1123	18.7533	26.6872	41.8506
0.156228	0.246094	0.348029	0.449334	0.520333	0.649995	0.769753	0.959338	1.17819	1.45171	1.73669	2.30489	3.49765	5.22044	7.27123	11.1424	18.7719	26.702	41.9803
0.15638	0.246094	0.348029	0.449676	0.522102	0.651069	0.771747	0.960623	1.18031	1.45861	1.74015	2.3053	3.52353	5.22342	7.34168	11.2074	18.8012	26.7156	42.24
0.157267	0.246094	0.348029	0.449679	0.522335	0.652856	0.772388	0.962661	1.18105	1.46182	1.74015	2.30928	3.58273	5.30627	7.34168	11.2236	18.8338	26.8423	42.303
0.157546	0.246094	0.348029	0.449865	0.527287	0.65409	0.778217	0.963959	1.20107	1.46617	1.74015	2.31532	3.58344	5.33947	7.34168	11.2842	18.8338	26.9954	43.9565
0.157977	0.247338	0.348029	0.449982	0.528702	0.656281	0.778217	0.964771	1.20365	1.47617	1.74015	2.33729	3.58628	5.34852	7.43512	11.4138	18.8962	27.0177	44.1843
0.15893	0.248962	0.348029	0.450441	0.529218	0.657485	0.778217	0.964794	1.22064	1.47656	1.7406	2.34506	3.60605	5.35051	7.44221	11.4338	18.9492	27.0401	44.3078
0.158985	0.248965	0.348029	0.451578	0.530372	0.66229	0.778217	0.973894	1.22843	1.47656	1.75014	2.35222	3.65845	5.38756	7.45555	11.5271	19.1653	27.1117	44.8141
0.159038	0.249019	0.348029	0.452075	0.531605	0.663313	0.778217	0.976823	1.23047	1.47656	1.75097	2.4124	3.65845	5.41696	7.54022	11.5659	19.1763	27.2932	45.1294
0.159192	0.25059	0.348029	0.452783	0.5327	0.664285	0.778217	0.980509	1.23047	1.47656	1.75664	2.43793	3.65845	5.41965	7.54362	11.5904	19.2413	27.3873	45.1754
0.159282	0.251672	0.351251	0.45309	0.533496	0.667521	0.781156	0.984375	1.23047	1.47714	1.76233	2.4668	3.69141	5.41965	7.64608	11.6029	19.3399	27.6327	45.3183
0.159618	0.252216	0.352051	0.453349	0.533897	0.669962	0.78162	0.984375	1.23047	1.49693	1.78382	2.47778	3.69141	5.43639	7.69391	11.6109	19.3743	27.7901	45.4141
0.159634	0.253042	0.35521	0.458457	0.534875	0.674238	0.787958	0.984375	1.23047	1.49693	1.80687	2.48237	3.72407	5.43815	7.69473	11.6541	19.5594	27.8537	45.5752
0.160028	0.253434	0.355434	0.463129	0.534946	0.677548	0.789228	0.985894	1.23047	1.49693	1.81485	2.50967	3.74393	5.49669	7.74609	11.693	19.5828	27.8771	45.9412
0.160581	0.254118	0.357667	0.463192	0.535997	0.678733	0.791343	0.987055	1.23047	1.50022	1.82934	2.50967	3.74839	5.50459	7.77049	11.6992	19.6512	27.8999	45.9609
0.160946	0.254504	0.357742	0.463427	0.536504	0.682184	0.797709	1.00513	1.23861	1.50392	1.84465	2.50992	3.75311	5.52504	7.77651	11.74	19.7574	28.0817	46.0518
0.161024	0.255923	0.358239	0.463525	0.536964	0.682412	0.798224	1.00587	1.24899	1.50874	1.84663	2.532	3.75646	5.53348	7.82098	11.7944	19.8117	28.1179	46.8334
0.161062	0.256018	0.358596	0.464053	0.538013	0.682571	0.800009	1.00878	1.25283	1.51301	1.85692	2.53369	3.75646	5.53743	7.83259	11.8335	20.0563	28.1237	47.1062
0.161309	0.256378	0.359069	0.464358	0.539658	0.68328	0.801499	1.01326	1.25484	1.51396	1.86434	2.55075	3.75646	5.53984	7.85833	11.8659	20.1391	28.199	47.3422
0.161333	0.25679	0.359948	0.467054	0.542287	0.683739	0.808746	1.01467	1.25484	1.51492	1.87685	2.55986	3.82033	5.55213	7.87884	12.0046	20.1857	28.2715	47.4788
0.161439	0.257239	0.361775	0.470232	0.545967	0.68429	0.811162	1.01467	1.25484	1.5164	1.88597	2.5935	3.84411	5.55213	7.91936	12.1487	20.2336	28.3297	47.9883
0.162316	0.257566	0.362925	0.473252	0.547864	0.685009	0.811379	1.01467	1.25484	1.52035	1.90215	2.64538	3.88088	5.59255	7.93273	12.1501	20.2599	28.4715	48.0747
0.162634	0.258835	0.366784	0.475851	0.548154	0.68753	0.820666	1.02473	1.25484	1.52655	1.91102	2.71284	3.89108	5.60653	7.95868	12.2874	20.3432	28.5172	48.4087
0.162749	0.258971	0.367375	0.47752	0.54873	0.687586	0.823542	1.02488	1.26746	1.53099	1.92205	2.73762	3.90253	5.61719	7.97824	12.344	20.3527	28.5404	49.379
0.162842	0.260004	0.368623	0.479226	0.550282	0.691256	0.825726	1.0261	1.27437	1.53168	1.94646	2.75084	3.90512	5.62845	8.00823	12.529	20.4273	28.5575	50.5156
0.163328	0.260936	0.368906	0.479965	0.550282	0.691421	0.826698	1.04392	1.27453	1.53189	1.9632	2.75141	3.94253	5.66016	8.04385	12.5629	20.442	28.6147	50.55
0.163544	0.261133	0.369542	0.482005	0.550282	0.69388	0.835253	1.04409	1.27636	1.53404	1.96584	2.75141	3.97514	5.68053	8.04617	12.5809	20.4536	28.7171	50.727
0.164176	0.263107	0.371425	0.485305	0.550282	0.696058	0.838441	1.04409	1.27976	1.5367	1.96822	2.75141	4.03969	5.70048	8.06121	12.611	20.4791	28.8445	50.9039
0.164809	0.263192	0.371857	0.48606	0.550282	0.696058	0.851463	1.04409	1.29767	1.53979	1.96875	2.75141	4.09601	5.71947	8.07248	12.7992	20.5355	29.0359	51.3623
0.16492	0.264843	0.372585	0.487174	0.550282	0.696058	0.855496	1.04409	1.30093	1.54504	1.96992	2.78423	4.18769	5.73903	8.07248	13.0004	20.5544	29.0484	51.3653
0.166154	0.265291	0.373948	0.488016	0.550282	0.696058	0.864516	1.04409	1.31973	1.54707	1.97644	2.8059	4.20525	5.73984	8.11041	13.1007	20.5821	29.0766	51.9561
0.166392	0.265608	0.374799	0.489446	0.550282	0.696058	0.86614	1.05187	1.32237	1.55003	1.98407	2.82332	4.21245	5.74512	8.14271	13.1751	20.6524	29.1702	52.0491
0.166809	0.265662	0.375073	0.489585	0.550282	0.696058	0.873246	1.05556	1.32526	1.5518	1.98407	2.83875	4.2467	5.74512	8.18054	13.2297	20.8356	29.3048	52.1928
0.167346	0.265896	0.376028	0.491126	0.550282	0.700614	0.875362	1.06376	1.3448	1.55237	1.98407	2.87689	4.28925	5.76091	8.18054	13.2704	20.8944	29.608	52.2351
0.167442	0.267185	0.380833	0.491413	0.550282	0.702088	0.87841	1.07352	1.35333	1.55262	1.99979	2.87782	4.30853	5.83078	8.35632	13.4413	20.9108	29.6137	52.4647
0.167478	0.267585	0.381285	0.492188	0.550282	0.702161	0.879027	1.07544	1.35456	1.55643	2.00951	2.88045	4.36079	5.89789	8.4177	13.5709	20.9249	29.6551	52.6077
0.167568	0.267967	0.382655	0.492188	0.550282	0.70303	0.880297	1.08539	1.35603	1.55643	2.01014	2.88145	4.38157	5.90451	8.48577	13.6244	20.931	29.7084	52.6261
0.167878	0.268035	0.382752	0.492188	0.550282	0.703421	0.880849	1.08579	1.35702	1.55643	2.01347	2.96837	4.41519	5.90551	8.53245	13.7328	21.0016	29.7203	52.6462
0.167924	0.268829	0.384801	0.492188	0.550282	0.705267	0.887304	1.09689	1.35965	1.55643	2.01581	2.97356	4.43652	5.91475	8.54297	13.7443	21.0119	29.818	52.6664
0.168954	0.269538	0.385406	0.492188	0.550282	0.706697	0.887304	1.10056	1.37436	1.55882	2.0218	2.97356	4.50831	5.9165	8.55284	13.7922	21.091	29.9163	53.0379
0.169035	0.269871	0.385424	0.492188	0.550524	0.711236	0.887304	1.10056	1.377	1.56579	2.02917	2.9774	4.51212	5.9376	8.59569	13.801	21.1139	29.9985	53.5957
0.169136	0.270061	0.388443	0.492188	0.554154	0.715625	0.887304	1.10056	1.38311	1.5723	2.02934	2.99787	4.52438	5.95816	8.60953	13.9386	21.2497	30.105	55.2531
0.169651	0.270531	0.388803	0.492188	0.55471	0.716161	0.887304	1.10056	1.38627	1.57577	2.03375	3.00396	4.53774	5.9712	8.63906	14.0295	21.4427	30.1984	55.4738
0.169703	0.270568	0.389131	0.492188	0.55766	0.717108	0.887304	1.10056	1.38949	1.57577	2.0509	3.01031	4.53803	6.0466	8.64136	14.036	21.5244	30.2495	56.4288
0.169778	0.271575	0.389601	0.492188	0.559484	0.717965	0.889056	1.10056	1.39123	1.57577	2.05894	3.01665	4.6693	6.07089	8.65537	14.0371	21.5586	30.2855	57.4339
0.170155	0.271779	0.390492	0.492188	0.562531	0.724763	0.890192	1.10056	1.39212	1.57893	2.06448	3.03459	4.68631	6.08802	8.69141	14.085	21.6455	30.3045	58.6108
0.17057	0.272134	0.393351	0.492188	0.563231	0.727164	0.89484	1.10056	1.39212	1.57908	2.06541	3.03933	4.70161	6.09299	8.7012	14.1477	21.6666	30.3455	59.1455
0.170968	0.274118	0.395176	0.492188	0.565193	0.727884	0.895437	1.10219	1.39212	1.57923	2.08577	3.04694	4.70682	6.11284	8.72158	14.2663	21.7358	30.7164	62.5935
0.171002	0.274151	0.395892	0.492188	0.566371	0.731265	0.89556	1.10546	1.39212	1.58379	2.10263	3.07583	4.72731	6.172	8.72853	14.3264	21.9274	30.8178	63.9598
0.171156	0.27462	0.396916	0.492188	0.566897	0.733806	0.904757	1.10775	1.39212	1.58495	2.10263	3.08355	4.79508	6.18345	8.91729	14.4495	22.0063	30.8409	67.6394
0.1715	0.274679	0.396996	0.492188	0.568077	0.734857	0.907035	1.1113	1.39375	1.59336	2.10652	3.08355	4.81839	6.25227	8.9478	14.5529	22.1484	31.1258	70.6003
0.171587	0.275334	0.397142	0.492188	0.573923	0.738281	0.907944	1.11491	1.40071	1.59654	2.11976	3.09473	4.8752	6.27418	8.9478	14.5757	22.1838	31.2888	74.0014
0.172959	0.277011	0.397606	0.493373	0.574718	0.738281	0.909242	1.1348	1.40884	1.60121	2.12878	3.09995	4.87629	6.27418	8.99373	14.5757	22.1856	31.3436	77.2137
0.17411	0.277813	0.399162	0.494411	0.575227	0.738281	0.917346	1.15002	1.40946	1.60849	2.1517	3.11287	4.91887	6.28615	9.03584	14.7738	22.3715	31.3587	79.5496
0.174228	0.27826	0.399221	0.499947	0.576318	0.738281	0.93278	1.15433	1.41322	1.61053	2.19543	3.13226	4.92188	6.30308	9.03974	15.0994	22.3874	31.3709	82.0524
0.174344	0.279272	0.402516	0.502627	0.577553	0.738281	0.938395	1.16605	1.41423	1.61259	2.21484	3.17588	4.93275	6.41246	9.10049	15.1519	22.3945	31.5202	83.7393
0.174501	0.279865	0.40439	0.508614	0.578698	0.738281	0.939726	1.18652	1.41659	1.61295	2.21543	3.19922	4.94043	6.41756	9.13203	15.2682	22.4349	31.642	84.4492
0.174765	0.282824	0.405253	0.509763	0.579715	0.738281	0.939785	1.18969	1.42711	1.61579	2.22537	3.20093	4.944	6.42214	9.13678	15.2905	22.4432	31.7597	84.6114
0.175472	0.283829	0.408263	0.511964	0.582799	0.740862	0.950303	1.19087	1.43312	1.61877	2.22847	3.20867	4.96251	6.43529	9.19456	15.31	22.5024	31.7698	85.2149
0.175969	0.287331	0.408877	0.515341	0.584896	0.743445	0.950979	1.19201	1.43496	1.63522	2.22847	3.21322	4.96832	6.44089	9.31588	15.402	22.5938	31.8233	85.6746
0.17634	0.288004	0.410748	0.515632	0.585308	0.746745	0.955392	1.20075	1.43496	1.63589	2.25292	3.22561	4.98302	6.47258	9.3386	15.4118	22.6267	31.8613
0.176834	0.289439	0.412424	0.516357	0.587729	0.747186	0.957857	1.20843	1.43496	1.64024	2.26886	3.25038	5.01935	6.53887	9.3386	15.455	22.662	32.1818
0.176892	0.291326	0.412611	0.516751	0.593032	0.749673	0.958038	1.21057	1.43641	1.64419	2.26887	3.26783	5.04942	6.5666	9.39791	15.565	22.7261	32.2242
0.177666	0.291479	0.413535	0.517654	0.593609	0.751808	0.964942	1.21207	1.44292	1.65085	2.26887	3.28584	5.0705	6.61255	9.4349	15.5663	23.0701	32.2496
0.17774	0.293624	0.416511	0.518667	0.596024	0.752278	0.979581	1.21506	1.44827	1.65085	2.26887	3.30169	5.09321	6.64407	9.45461	15.5789	23.128	32.5328
0.177766	0.293926	0.416798	0.519532	0.607083	0.755549	0.980968	1.22634	1.45156	1.65085	2.26887	3.34724	5.1118	6.64909	9.45863	15.8134	23.2183	32.5473
0.177851	0.294199	0.418047	0.523079	0.611427	0.755703	0.984375	1.23047	1.45199	1.6596	2.26887	3.36746	5.12088	6.65537	9.46742	15.8599	23.2463	32.5784
0.178341	0.294407	0.418547	0.523566	0.611688	0.760544	0.984375	1.23047	1.4521	1.66611	2.28911	3.37807	5.13859	6.66135	9.4909	15.8828	23.3996	32.6098
0.178343	0.294914	0.42028	0.524413	0.612361	0.763891	0.984375	1.23047	1.45556	1.66746	2.29856	3.39775	5.19135	6.69447	9.55036	16.1236	23.4307	32.8175
0.178831	0.295665	0.421516	0.525377	0.613678	0.764632	0.984375	1.23047	1.4623	1.6767	2.3256	3.42012	5.2082	6.69447	9.65114	16.1487	23.4629	32.9889
0.179295	0.29865	0.421841	0.5255	0.613872	0.768925	0.985894	1.23047	1.46299	1.69576	2.32932	3.44712	5.2297	6.69572	9.68688	16.2086	23.4774	33.0729
0.179579	0.29886	0.422302	0.527401	0.614287	0.770157	0.988751	1.23047	1.47116	1.69591	2.33418	3.45409	5.23202	6.72156	9.71276	16.3307	23.481	33.5013
0.179746	0.299261	0.422374	0.529665	0.618848	0.778217	0.990398	1.23047	1.47232	1.70163	2.33943	3.48221	5.28242	6.72534	9.71405	16.3611	23.5531	33.8594
0.180049	0.300501	0.423422	0.530473	0.619067	0.778217	0.991731	1.23939	1.47656	1.70938	2.34029	3.52353	5.29847	6.77438	9.80059	16.3974	23.6006	33.8859
0.180986	0.300704	0.423627	0.530524	0.619537	0.778217	1.00948	1.2464	1.47656	1.71414	2.34757	3.55599	5.33738	6.779	9.84408	16.4203	23.6301	34.1076
0.181747	0.301268	0.423985	0.534093	0.623954	0.778217	1.01453	1.25484	1.48307	1.72266	2.36126	3.55972	5.34995	6.82051	9.8499	16.4294	23.6301	34.1369
0.182362	0.301649	0.424105	0.534881	0.624683	0.778217	1.01467	1.25484	1.48454	1.72603	2.36508	3.60623	5.37299	6.82439	9.91173	16.5981	23.6375	34.203
0.182407	0.302736	0.425013	0.539415	0.625225	0.778217	1.01467	1.25484	1.4866	1.74015	2.39226	3.64937	5.37477	6.82489	9.91789	16.6461	23.6859	34.5611
0.18241	0.303134	0.425461	0.542014	0.629359	0.778217	1.01467	1.25484	1.49412	1.74015	2.41422	3.65845	5.37477	6.99836	9.99335	16.7897	23.7286	34.7361
0.182771	0.304468	0.425771	0.542654	0.630954	0.778217	1.01467	1.25484	1.49631	1.74411	2.42374	3.69001	5.38146	7.00752	10.1467	16.8802	23.8825	34.7559
0.183238	0.30504	0.42581	0.54653	0.631122	0.778217	1.01467	1.25484	1.49693	1.75899	2.4313	3.6996	5.3921	7.04705	10.1735	16.9358	23.8841	35.0406
0.183908	0.306221	0.42581	0.54682	0.63522	0.778217	1.01467	1.26015	1.49693	1.76776	2.44272	3.6996	5.41965	7.04705	10.176	16.9644	23.9471	35.1598
0.184077	0.306437	0.428317	0.547447	0.635988	0.778217	1.01467	1.26502	1.49693	1.77461	2.45525	3.70414	5.41965	7.09765	10.1965	17.0264	24.0979	35.457
0.184361	0.30736	0.43037	0.549064	0.641054	0.783583	1.01467	1.26639	1.49693	1.78136	2.48511	3.74175	5.41965	7.1748	10.2518	17.0942	24.1184	35.4717
0.184497	0.30741	0.431467	0.549428	0.641909	0.789892	1.01467	1.28252	1.49693	1.79159	2.49973	3.75646	5.45492	7.20275	10.2655	17.1295	24.1471	35.4921
0.184618	0.307603	0.433846	0.550282	0.645281	0.798866	1.01467	1.28904	1.49693	1.81216	2.50464	3.80315	5.46417	7.23783	10.3088	17.2266	24.2986	35.5658
0.185053	0.308273	0.434122	0.550282	0.646273	0.801731	1.01467	1.28904	1.49693	1.82161	2.53277	3.83245	5.50222	7.26198	10.5316	17.2584	24.3832	35.7438
0.185141	0.30841	0.435007	0.550282	0.650797	0.803842	1.01647	1.29158	1.49693	1.83866	2.54779	3.84893	5.50282	7.26979	10.5689	17.2976	24.3943	35.8132
0.18545	0.30923	0.439126	0.550282	0.653244	0.816983	1.01937	1.30012	1.49693	1.85148	2.55168	3.88483	5.50282	7.28787	10.6505	17.36	24.5033	35.9192
0.186005	0.31028	0.440009	0.550282	0.655628	0.817297	1.02388	1.30287	1.49766	1.86099	2.55607	3.9278	5.50579	7.28787	10.74	17.3684	24.5416	35.9459
0.186256	0.310902	0.441234	0.550282	0.656681	0.824062	1.02402	1.30492	1.50334	1.86768	2.55919	3.96655	5.50648	7.33377	10.7475	17.4205	24.5465	36.0424
0.187152	0.31245	0.44266	0.550282	0.657731	0.824753	1.02423	1.30516	1.51129	1.86784	2.58204	3.96814	5.53027	7.35963	10.7861	17.5211	24.6204	36.0983
0.187727	0.312563	0.443885	0.550282	0.658909	0.833781	1.04099	1.30863	1.51587	1.87383	2.58296	3.97577	5.58826	7.35984	10.8132	17.6112	24.6291	36.2555
0.188792	0.313185	0.444515	0.550282	0.666127	0.837303	1.04141	1.30879	1.52047	1.87419	2.58886	3.97577	5.6118	7.41439	10.8195	17.6125	24.6696	36.4788
0.189064	0.313396	0.446335	0.550282	0.67025	0.847138	1.04409	1.31218	1.52483	1.87808	2.60938	4.03115	5.65363	7.44001	10.8533	17.6176	24.7162	36.4985
0.18952	0.313775	0.448304	0.550282	0.676416	0.849872	1.04409	1.31661	1.52618	1.8801	2.63151	4.03624	5.6621	7.45454	10.9538	17.7272	24.7321	36.5712
0.189678	0.315769	0.449101	0.550282	0.680562	0.853248	1.04409	1.32097	1.52685	1.8842	2.63437	4.04456	5.6655	7.53832	10.9745	17.7461	24.7981	36.6445
0.190037	0.316118	0.449676	0.550282	0.682184	0.854108	1.05076	1.32413	1.53575	1.89441	2.65051	4.05507	5.6655	7.60394	11.0007	17.7827	24.8165	36.6979
0.190054	0.31751	0.450232	0.550282	0.683519	0.874723	1.05613	1.32526	1.53652	1.9047	2.66191	4.09616	5.67507	7.61111	11.0088	17.7968	24.8664	36.873
0.19045	0.322289	0.453629	0.550282	0.687882	0.878819	1.05676	1.32526	1.53746	1.9097	2.66191	4.09641	5.68111	7.61881	11.2324	17.8278	24.8709	37.0188
0.190472	0.324878	0.454487	0.550282	0.687927	0.879399	1.05747	1.32526	1.53962	1.92205	2.68352	4.14341	5.68152	7.61934	11.4172	17.8638	24.9524	37.0224
0.190602	0.32944	0.45525	0.550282	0.688965	0.882299	1.06061	1.32526	1.54081	1.92205	2.70703	4.14399	5.68826	7.63749	11.4612	18.0237	24.977	37.0695
0.190643	0.333214	0.456121	0.550282	0.68949	0.882673	1.07084	1.32526	1.54502	1.92354	2.75141	4.16333	5.71736	7.77868	11.4768	18.0272	25.0707	37.2815
0.190722	0.333656	0.458384	0.550282	0.696004	0.885377	1.07158	1.32526	1.55005	1.92659	2.77706	4.16626	5.72399	7.78217	11.4797	18.102	25.1209	37.3115
0.191647	0.333713	0.459375	0.550282	0.696058	0.887304	1.0757	1.32526	1.55303	1.97947	2.8059	4.18359	5.72955	7.81416	11.4887	18.1213	25.295	37.5759
0.191852	0.335983	0.459893	0.550282	0.696058	0.887304	1.0776	1.32544	1.55643	1.98309	2.8059	4.1896	5.74512	7.86485	11.5133	18.181	25.3046	37.7213
0.193467	0.336501	0.460686	0.550282	0.696058	0.887304	1.07766	1.32619	1.55643	1.98407	2.81136	4.19083	5.76616	7.87884	11.5956	18.29	25.319	37.7389
0.19484	0.33676	0.460896	0.550282	0.696058	0.887304	1.08346	1.327	1.55643	1.98407	2.82894	4.26536	5.79761	7.89515	11.5974	18.35	25.3238	37.7668
0.194914	0.337127	0.461379	0.550282	0.700934	0.887304	1.08421	1.32877	1.55643	1.98453	2.84449	4.29784	5.80802	7.89756	11.6733	18.4747	25.3584	37.8511
0.195645	0.337162	0.462311	0.552226	0.701421	0.887304	1.085	1.32985	1.55643	1.99705	2.88045	4.29784	5.83241	7.89912	11.685	18.5231	25.3584	37.8538
0.196562	0.33762	0.463119	0.554888	0.706822	0.887304	1.08942	1.33693	1.56364	2.00487	2.88045	4.30203	5.83403	7.94391	11.7691	18.534	25.3775	38.0043
0.197589	0.33793	0.465414	0.555711	0.70695	0.887304	1.09078	1.33782	1.56447	2.00894	2.88045	4.34557	5.8463	7.97392	11.7779	18.5592	25.3933	38.188
0.198598	0.338305	0.467148	0.558115	0.713617	0.887304	1.09466	1.34566	1.56619	2.02089	2.88938	4.35384	5.8573	8.01223	11.8534	18.6516	25.4442	38.2225
0.198763	0.33913	0.470543	0.558649	0.715353	0.887304	1.09675	1.36098	1.56976	2.02934	2.8974	4.35384	5.89126	8.06121	11.9044	18.7096	25.4478	38.2559
0.198978	0.340789	0.47079	0.559529	0.716714	0.887304	1.10056	1.36227	1.57019	2.02934	2.95312	4.36079	5.9165	8.07248	11.9308	18.729	25.6186	38.2992
0.198993	0.341021	0.470797	0.560436	0.723428	0.889578	1.10056	1.36812	1.57525	2.02934	2.97356	4.36079	5.9165	8.11736	11.9577	18.7525	25.7318	38.6161
0.199515	0.341694	0.476259	0.561924	0.724719	0.891274	1.10056	1.38842	1.57577	2.04018	2.98215	4.38257	5.9165	8.12151	12.11	18.8065	25.7318	38.7496
0.199942	0.342283	0.477979	0.564348	0.724839	0.894011	1.10056	1.3916	1.57577	2.08443	2.99421	4.42274	5.94294	8.18054	12.217	18.8643	25.9372	38.9581
0.200361	0.344244	0.478089	0.567667	0.732333	0.897098	1.10056	1.39164	1.58265	2.0875	3.01812	4.46326	5.9799	8.19539	12.3192	18.8748	25.9949	39.132
0.200392	0.345335	0.478298	0.56772	0.733034	0.898098	1.10056	1.39212	1.58844	2.08784	3.02431	4.48853	5.98772	8.19942	12.3979	18.93	26.2018	39.2825
0.200601	0.345587	0.478526	0.57069	0.735133	0.898942	1.10056	1.39212	1.58872	2.10263	3.05734	4.50226	6.02393	8.27256	12.4442	19.0078	26.3366	39.4729
0.2009	0.347178	0.479023	0.57303	0.735831	0.907273	1.10056	1.39212	1.61795	2.10263	3.08355	4.50406	6.02957	8.30179	12.4979	19.1131	26.3423	39.5201
0.201243	0.347255	0.47983	0.575263	0.738033	0.910788	1.10056	1.39212	1.61859	2.10263	3.13226	4.51297	6.05311	8.32728	12.5024	19.153	26.4342	39.5274
0.202212	0.347285	0.480254	0.581506	0.738281	0.922728	1.10056	1.39212	1.63049	2.11013	3.13378	4.61079	6.1472	8.35632	12.5532	19.1805	26.4834	39.6678
0.202432	0.347939	0.481099	0.582799	0.738281	0.92329	1.10056	1.39212	1.64838	2.11382	3.14229	4.61933	6.15234	8.38165	12.5532	19.2725	26.6521	39.6993
0.202869	0.348029	0.482418	0.584938	0.738281	0.924041	1.10056	1.39212	1.65085	2.11698	3.14958	4.67863	6.16116	8.4177	12.7117	19.3305	26.6592	39.7519
0.203009	0.348029	0.484304	0.588834	0.738281	0.925374	1.10056	1.39503	1.65085	2.11698	3.15154	4.70161	6.16709	8.44419	12.7779	19.3962	26.6929	39.8546
0.203818	0.348029	0.484479	0.597337	0.738281	0.927783	1.10951	1.42309	1.65396	2.12007	3.16805	4.70406	6.172	8.45842	12.8063	19.4004	26.7869	39.8576
0.20441	0.348029	0.485693	0.600129	0.738281	0.932864	1.11814	1.42509	1.65923	2.13122	3.19922	4.72731	6.19918	8.46791	12.8803	19.4476	26.8073	39.9079
0.204522	0.348029	0.486502	0.603892	0.738281	0.934514	1.12335	1.42738	1.65933	2.13278	3.19922	4.73371	6.2017	8.47506	13.0314	19.4663	26.8513	39.9983
0.20521	0.348029	0.488016	0.604735	0.738281	0.941976	1.13086	1.43046	1.66127	2.13574	3.31085	4.73371	6.21113	8.48021	13.0523	19.6135	26.8795	40.1658
0.205438	0.348029	0.489324	0.605091	0.738281	0.946842	1.13271	1.43496	1.66492	2.14173	3.36727	4.73371	6.21816	8.48577	13.0727	19.689	26.9268	40.2517
0.205843	0.348029	0.489352	0.608596	0.743027	0.959142	1.13698	1.43496	1.66594	2.17998	3.36823	4.77828	6.24364	8.48577	13.1051	19.7888	26.9369	40.3139
0.205875	0.348029	0.490921	0.610617	0.743106	0.969869	1.13766	1.43969	1.67885	2.19584	3.40522	4.77828	6.27418	8.53754	13.1113	19.8178	26.9516	40.4583
0.20602	0.348029	0.491039	0.611484	0.747868	0.972641	1.16367	1.44586	1.68359	2.22734	3.42091	4.80587	6.27418	8.55757	13.1533	19.8701	26.9634	40.6896
0.206455	0.348029	0.492188	0.613901	0.750917	0.976383	1.16929	1.44846	1.69544	2.22847	3.43109	4.82639	6.28865	8.56267	13.2982	19.9082	26.9896	40.787
0.206514	0.348029	0.492188	0.620375	0.764348	0.977198	1.17139	1.44975	1.69901	2.22847	3.45409	4.83498	6.37294	8.65537	13.3255	19.9334	27.0042	40.8553
0.20723	0.348029	0.492188	0.620552	0.769791	0.981769	1.17153	1.46409	1.70594	2.22847	3.45811	4.84748	6.38897	8.70766	13.4121	20.0612	27.0233	41.5321
0.207626	0.348029	0.492188	0.626599	0.773204	0.983342	1.17745	1.46601	1.71203	2.22847	3.45946	4.85892	6.44111	8.72158	13.4903	20.0834	27.0521	41.9979
0.209423	0.348029	0.492188	0.628773	0.773432	0.984375	1.17882	1.46785	1.71877	2.24273	3.48029	4.86138	6.44472	8.72849	13.5709	20.1812	27.1608	42.1338
0.209439	0.348029	0.492188	0.629295	0.778217	0.984375	1.18694	1.46831	1.72266	2.26887	3.49588	4.87711	6.46529	8.73842	13.591	20.1857	27.1608	42.2486
0.209595	0.348029	0.492188	0.630425	0.778217	0.984375	1.18852	1.47223	1.73088	2.26887	3.49765	4.88482	6.49706	8.79419	13.6687	20.1887	27.1819	42.3632
0.210401	0.348029	0.492188	0.630784	0.778217	0.984375	1.1924	1.47594	1.74015	2.26911	3.49765	4.901	6.51568	8.79782	13.6792	20.2182	27.192	42.6515
0.211112	0.348029	0.492188	0.63122	0.778217	0.984375	1.19678	1.47656	1.74015	2.27728	3.5312	4.90338	6.53887	8.8083	13.7834	20.2291	27.2376	43.0281
0.211417	0.348029	0.492188	0.634088	0.778217	0.984375	1.19758	1.47656	1.74015	2.31221	3.53838	4.90338	6.55275	8.81076	13.8032	20.2639	27.3208	43.3467
0.212145	0.348029	0.492188	0.635345	0.778217	0.984375	1.20005	1.47656	1.74015	2.32164	3.54049	4.93909	6.57557	8.91389	13.9386	20.3292	27.3981	43.537
0.212967	0.348029	0.492188	0.637352	0.778217	0.984375	1.20508	1.47905	1.74015	2.33465	3.5447	4.94072	6.6182	8.91959	14.0812	20.4042	27.4668	43.7313
0.213436	0.348029	0.492188	0.643908	0.778217	0.984375	1.21375	1.47974	1.74015	2.34436	3.55321	4.95391	6.62628	8.9237	14.2416	20.4425	27.5064	43.8614
0.213977	0.348029	0.492188	0.645247	0.778217	0.984375	1.21522	1.48383	1.74015	2.35934	3.56436	5.03132	6.6421	8.97474	14.2416	20.4558	27.6327	43.8728
0.214501	0.348029	0.492188	0.64571	0.778217	0.984375	1.23047	1.48466	1.74471	2.38184	3.60007	5.06738	6.6551	9.03875	14.2532	20.5455	27.6951	43.8915
0.2158	0.348029	0.492188	0.646218	0.778217	0.984375	1.23047	1.48879	1.75757	2.39039	3.6009	5.09425	6.66151	9.0564	14.4215	20.6602	27.7824	43.9039
0.216545	0.348029	0.492188	0.646694	0.778217	0.984375	1.23047	1.49693	1.77461	2.42929	3.60864	5.12088	6.71705	9.14529	14.5049	20.6626	27.8637	43.9068
0.217077	0.348029	0.492188	0.649524	0.778217	0.984375	1.23047	1.49693	1.77461	2.4338	3.6312	5.12741	6.72502	9.19824	14.5152	20.6777	27.9767	44.0948
0.217605	0.348029	0.492188	0.650797	0.778217	0.984375	1.23047	1.49693	1.77461	2.45278	3.63353	5.13859	6.7272	9.25248	14.6214	20.6851	27.992	44.243
0.217919	0.348029	0.492188	0.650947	0.778217	0.984375	1.23047	1.49693	1.77763	2.45633	3.63903	5.17382	6.7575	9.26372	14.6906	20.6866	28.059	44.2729
0.217973	0.348029	0.492188	0.655047	0.778217	0.984375	1.23047	1.50744	1.77861	2.45642	3.65222	5.19135	6.79299	9.27171	14.7656	20.7544	28.0892	44.513
0.218257	0.348029	0.492188	0.656108	0.778217	0.98467	1.23047	1.51292	1.78608	2.46094	3.65845	5.19354	6.80662	9.30074	14.8168	20.8937	28.0935	44.6265
0.218519	0.348029	0.492728	0.658856	0.778217	0.985354	1.23047	1.51904	1.83192	2.46584	3.69209	5.20136	6.80662	9.41033	14.8792	20.9278	28.1129	44.7931
0.218748	0.348029	0.494598	0.659452	0.778217	0.989569	1.23047	1.52151	1.83638	2.47321	3.70733	5.23379	6.80662	9.45217	14.9179	20.9541	28.1377	44.8296
0.219787	0.349608	0.500728	0.66159	0.780147	0.993574	1.23047	1.52772	1.84544	2.511	3.74475	5.26088	6.81569	9.49935	14.9227	21.0122	28.1882	44.837
0.221384	0.353516	0.5021	0.664066	0.781844	1.00543	1.23382	1.53127	1.84726	2.54283	3.74998	5.26456	6.84514	9.51223	14.9232	21.044	28.199	44.8438
0.221544	0.355017	0.502734	0.665303	0.785022	1.00924	1.23558	1.53483	1.8477	2.54299	3.76396	5.29327	6.85238	9.51264	14.9306	21.1885	28.7171	44.8681
0.221642	0.355267	0.503198	0.66574	0.786051	1.00925	1.23857	1.53643	1.84829	2.55821	3.76451	5.32843	6.89502	9.53855	14.9412	21.2161	28.7975	45.3621
0.222124	0.356923	0.504397	0.667046	0.791308	1.00926	1.2451	1.53818	1.86184	2.57849	3.76451	5.35047	6.91582	9.55655	14.9491	21.4102	28.8024	45.6177
0.223368	0.357626	0.506512	0.668738	0.79221	1.00954	1.24668	1.54046	1.87419	2.57927	3.7657	5.36248	6.94752	9.58503	14.9713	21.4229	28.814	46.206
0.224058	0.358022	0.507131	0.671808	0.79236	1.01143	1.24796	1.54101	1.87419	2.58614	3.79098	5.39171	6.96928	9.59335	15.0948	21.5005	28.9764	46.6019
0.224071	0.362454	0.513186	0.672565	0.801111	1.01467	1.25484	1.54993	1.87419	2.6003	3.81407	5.4183	7.04705	9.67065	15.1075	21.5604	29.0557	46.658
0.224225	0.362889	0.516702	0.67396	0.803388	1.01467	1.25484	1.55185	1.87486	2.6388	3.83663	5.42766	7.05148	9.76034	15.1083	21.6559	29.1432	47.3275
0.224617	0.36289	0.518097	0.675382	0.803842	1.01467	1.25484	1.55361	1.87613	2.63953	3.84411	5.44478	7.10559	9.80059	15.2623	21.7838	29.371	47.3524
0.224854	0.363575	0.5182	0.679106	0.807934	1.01467	1.25484	1.55643	1.89152	2.6555	3.85198	5.53027	7.11938	9.84683	15.2757	21.8151	29.5175	47.4932
0.225428	0.364069	0.519116	0.689386	0.810659	1.01467	1.25484	1.55643	1.8984	2.65982	3.88322	5.53027	7.16592	9.92774	15.3291	21.9037	29.5692	47.6183
0.225966	0.364587	0.519157	0.692229	0.811847	1.01467	1.25512	1.55643	1.91453	2.66171	3.88469	5.55224	7.19634	9.95344	15.4018	21.941	29.599	47.7504
0.226646	0.364924	0.522473	0.694184	0.814569	1.01467	1.25675	1.55643	1.92205	2.66191	3.88704	5.56847	7.1991	9.98602	15.4182	21.9507	29.6551	47.7916
0.226904	0.365419	0.526182	0.696058	0.815874	1.01467	1.26347	1.55987	1.92205	2.66191	3.91086	5.56847	7.21395	10.0529	15.4726	21.97	29.7307	47.9586
0.228212	0.365523	0.530136	0.696058	0.823301	1.01467	1.26923	1.56391	1.94595	2.69173	3.93057	5.6118	7.23783	10.0898	15.487	21.9722	29.7327	48.2038
0.228268	0.366838	0.530608	0.696058	0.82434	1.01467	1.27373	1.57577	1.97054	2.69835	3.94071	5.61414	7.28889	10.1433	15.4961	22.0237	29.9386	48.561
0.228999	0.367817	0.531196	0.696058	0.827357	1.01622	1.29607	1.57577	1.97158	2.70005	3.94518	5.70391	7.30115	10.2774	15.5262	22.0731	29.9669	48.6245
0.229931	0.36797	0.533026	0.696058	0.827885	1.0173	1.29783	1.57577	1.97527	2.70167	3.97577	5.70619	7.30447	10.2931	15.5516	22.1484	30.0234	49.0773
0.230278	0.369211	0.533584	0.696058	0.830126	1.01983	1.29876	1.57577	1.98407	2.70703	3.99263	5.71552	7.31689	10.3037	15.5524	22.1703	30.0396	49.1954
0.230625	0.369211	0.53377	0.696058	0.836315	1.0242	1.29924	1.57577	1.98407	2.70703	4.00211	5.74512	7.3372	10.362	15.6284	22.1929	30.0797	49.2415
0.230895	0.369494	0.53639	0.696058	0.838004	1.0264	1.30074	1.57577	1.98407	2.7176	4.00406	5.74512	7.40507	10.3655	15.7038	22.2358	30.0947	49.7943
0.230906	0.370498	0.536753	0.696058	0.840172	1.03712	1.30364	1.57577	2.00021	2.71819	4.03624	5.80787	7.44001	10.3714	15.8726	22.3417	30.105	49.8501
0.230992	0.371792	0.537215	0.696058	0.840322	1.03757	1.30891	1.57577	2.01553	2.75141	4.03624	5.83403	7.44964	10.3824	15.873	22.3999	30.1292	49.9031
0.231386	0.371859	0.537447	0.696058	0.846328	1.04409	1.3113	1.57577	2.02301	2.75141	4.05015	5.8428	7.50124	10.5158	15.9359	22.5771	30.3728	50.0902
0.231559	0.373534	0.541403	0.696058	0.848181	1.04409	1.317	1.5785	2.02934	2.75141	4.05111	5.86436	7.52338	10.5251	15.9411	22.6359	30.5642	50.1447
0.232903	0.374814	0.542707	0.698596	0.852031	1.04409	1.32477	1.5898	2.02934	2.79858	4.11143	5.87533	7.52902	10.5738	15.9727	22.6366	30.5959	50.2488
0.233327	0.375477	0.543715	0.698672	0.858432	1.04409	1.32478	1.59119	2.02934	2.8059	4.14069	5.89676	7.53304	10.591	15.9809	22.6448	30.917	50.7662
0.233719	0.377034	0.54612	0.699963	0.862982	1.04409	1.32526	1.59143	2.04154	2.80943	4.21245	5.9165	7.53304	10.6154	15.9995	22.6527	30.9238	50.9794
0.234291	0.377172	0.546565	0.700678	0.864124	1.04409	1.32526	1.59234	2.06163	2.81316	4.22267	5.9165	7.53457	10.6846	16.1136	22.662	31.2705	51.3859
0.234334	0.377353	0.546707	0.701214	0.865481	1.04409	1.32526	1.59237	2.06987	2.88132	4.28863	5.92672	7.58113	10.7943	16.1487	22.7101	31.401	51.3859
0.234712	0.377798	0.54769	0.704152	0.880348	1.04409	1.32526	1.59837	2.0791	2.89842	4.30771	5.92672	7.59294	10.8281	16.1615	22.7261	31.5202	51.6738
0.234766	0.378105	0.548904	0.707152	0.880629	1.04409	1.32526	1.60042	2.0838	2.91474	4.32114	5.95221	7.62313	10.8575	16.1936	22.7859	31.5202	51.9616
0.235053	0.378178	0.549122	0.707161	0.881947	1.04409	1.32526	1.6011	2.10263	2.91566	4.36079	5.9573	7.63448	10.9083	16.2291	22.7966	31.7475	53.1065
0.235244	0.379082	0.550044	0.707673	0.887304	1.04964	1.32526	1.60508	2.11346	2.9169	4.36079	6.0092	7.64481	10.9199	16.2887	22.8324	31.8411	54.2965
0.235636	0.379303	0.550282	0.71257	0.887304	1.04975	1.32526	1.61803	2.11956	2.95058	4.36079	6.01663	7.70534	10.9712	16.3407	23.0029	32.016	54.5779
0.237481	0.381804	0.550282	0.716012	0.887304	1.05672	1.32976	1.63594	2.13737	2.96336	4.38491	6.02717	7.7275	11.088	16.5599	23.0239	32.1747	55.3953
0.237553	0.381855	0.550282	0.719361	0.887304	1.05794	1.33391	1.63892	2.16325	2.96336	4.43652	6.03301	7.74489	11.2187	16.5746	23.1092	32.31	55.9347
0.237826	0.382207	0.550282	0.719543	0.887304	1.06795	1.33668	1.64463	2.18558	2.97356	4.43652	6.05134	7.75768	11.2236	16.6054	23.1184	32.3439	56.0377
0.23789	0.38296	0.550282	0.720707	0.887304	1.06849	1.3386	1.65085	2.19102	2.97374	4.44392	6.05534	7.82098	11.2514	16.6129	23.1793	32.362	57.9079
0.238578	0.384899	0.550282	0.721357	0.887304	1.07036	1.34374	1.65085	2.20113	2.98765	4.45197	6.06559	7.8468	11.2582	16.7146	23.1969	32.462	60.3709
0.239801	0.38595	0.550282	0.721487	0.887304	1.07046	1.34668	1.65085	2.20672	3.00396	4.45695	6.09299	7.87884	11.3444	16.8228	23.2751	32.4713	60.7852
0.239801	0.386366	0.550282	0.722055	0.887304	1.07063	1.35533	1.65357	2.21484	3.05977	4.47045	6.13397	7.95358	11.3444	16.9638	23.3601	32.6976	64.5094
0.241454	0.387986	0.550282	0.722735	0.887304	1.07125	1.35616	1.65382	2.22708	3.07074	4.47336	6.15234	8.01601	11.4003	17.0131	23.3841	32.7748	67.1781
0.242037	0.388375	0.550282	0.722956	0.887304	1.07954	1.35796	1.66701	2.22847	3.10962	4.50262	6.15234	8.0172	11.4008	17.0497	23.3906	32.8671	69.6226
0.24301	0.388757	0.550282	0.723707	0.887304	1.08003	1.35973	1.67801	2.238	3.11184	4.51768	6.15234	8.05436	11.4093	17.1239	23.4836	33.2248	71.8792
0.243239	0.389293	0.550282	0.725955	0.887304	1.08177	1.37073	1.69545	2.25638	3.14985	4.52438	6.15844	8.22423	11.4396	17.1367	23.5212	33.3293	73.8726
0.243293	0.389627	0.550282	0.728216	0.888641	1.08378	1.37846	1.70477	2.26111	3.17841	4.52438	6.172	8.22894	11.4506	17.4779	23.5686	33.3542	75.9572
0.243933	0.390387	0.550282	0.730748	0.89394	1.08551	1.38196	1.71312	2.2618	3.20867	4.53774	6.17715	8.25057	11.5131	17.5814	23.5968	33.5425	77.5495
0.244301	0.390575	0.550282	0.731967	0.898234	1.09564	1.38458	1.71537	2.26264	3.21923	4.54121	6.22581	8.25424	11.569	17.6491	23.6688	33.5859	78.0385
0.244378	0.391288	0.550282	0.732516	0.902122	1.09613	1.38615	1.71769	2.26887	3.23686	4.59311	6.2306	8.30179	11.6015	17.6987	23.6711	33.9975	78.7664
0.244502	0.391398	0.550282	0.732899	0.90366	1.09936	1.38968	1.72102	2.27022	3.24458	4.59983	6.2306	8.35995	11.6395	17.7341	23.6754	34.0295	79.1478
0.246094	0.39244	0.550282	0.734394	0.911266	1.09984	1.39212	1.72266	2.27615	3.25915	4.64329	6.25843	8.37224	11.7536	17.8346	23.6877	34.2166	79.309
0.246094	0.394492	0.550282	0.735537	0.917031	1.10056	1.39212	1.72266	2.27841	3.30355	4.65346	6.27418	8.38197	11.7768	17.8465	23.8457	34.3495	80.2004
0.246094	0.394591	0.550282	0.738281	0.917494	1.10056	1.39212	1.733	2.28123	3.30718	4.65891	6.27863	8.41168	11.8107	17.8693	23.8825	34.379	80.5112
0.246094	0.395565	0.550282	0.738281	0.918283	1.10056	1.39212	1.73339	2.30846	3.31706	4.6693	6.30032	8.4177	11.8657	17.908	23.8825	34.4742	80.6522
0.246094	0.398394	0.550282	0.738281	0.918305	1.10056	1.39977	1.7376	2.32164	3.32905	4.72731	6.31739	8.44447	11.9486	17.9918	23.9129	34.5689	80.7156
0.246094	0.400371	0.550282	0.738281	0.925767	1.10056	1.41756	1.74015	2.32164	3.40969	4.75286	6.39844	8.47122	12.0083	18.0254	24.0328	34.5728
0.246094	0.400711	0.550282	0.738281	0.927269	1.10056	1.42433	1.74474	2.32391	3.41557	4.77828	6.43781	8.51286	12.097	18.1149	24.0833	34.5809
0.246094	0.402516	0.550282	0.738281	0.933627	1.10056	1.42771	1.74849	2.32964	3.42769	4.80823	6.44089	8.5186	12.1216	18.1677	24.1247	34.7116
0.246094	0.403167	0.550282	0.738281	0.941299	1.108	1.42876	1.74949	2.34149	3.45166	4.81195	6.44366	8.52997	12.1493	18.239	24.1247	34.9342
0.246094	0.403439	0.550282	0.738281	0.945222	1.10928	1.43496	1.7513	2.35449	3.45409	4.82408	6.45478	8.53245	12.2382	18.2408	24.1285	34.9848
0.246094	0.40456	0.550282	0.738281	0.94748	1.11005	1.43496	1.75733	2.3558	3.46039	4.83498	6.49706	8.55837	12.4307	18.2724	24.1285	35.088
0.246094	0.405253	0.550282	0.738281	0.947674	1.11186	1.43558	1.77077	2.36999	3.4718	4.84121	6.53162	8.57099	12.5024	18.2933	24.1373	35.2187
0.246094	0.406562	0.550282	0.738281	0.951428	1.11658	1.43566	1.77461	2.40743	3.48029	4.85373	6.5666	8.59273	12.5315	18.3061	24.1749	35.229
0.246094	0.407488	0.550282	0.738281	0.951681	1.12248	1.4387	1.78202	2.41554	3.49132	4.90338	6.62628	8.59569	12.5484	18.3896	24.1881	35.2789
0.246094	0.407564	0.550282	0.738281	0.952661	1.12464	1.44117	1.78338	2.42374	3.49765	4.90338	6.66274	8.59569	12.6541	18.4186	24.1937	35.2805
0.246094	0.408097	0.550282	0.744418	0.9563	1.12537	1.45807	1.78405	2.42374	3.49765	4.90338	6.68542	8.61328	12.7109	18.4772	24.2037	35.3031
0.246094	0.411094	0.550282	0.747599	0.956688	1.12641	1.46034	1.79029	2.42466	3.49765	4.92664	6.68542	8.62806	12.7226	18.498	24.2212	35.4255
0.246094	0.41154	0.550282	0.753248	0.959334	1.12927	1.4623	1.79159	2.44336	3.49963	4.93915	6.69082	8.6777	12.8559	18.498	24.2468	35.4449
0.246094	0.411625	0.550282	0.754836	0.961025	1.13368	1.4645	1.79159	2.4511	3.50808	4.94563	6.69447	8.70769	12.8818	18.534	24.2786	35.4668
0.246094	0.412166	0.550282	0.755034	0.96634	1.13609	1.46511	1.79159	2.46094	3.52226	4.94964	6.69857	8.7239	12.9539	18.5413	24.3633	35.5111
0.246094	0.412785	0.550282	0.755693	0.967171	1.13814	1.47441	1.79852	2.46094	3.52353	4.95019	6.70095	8.72853	12.9788	18.6057	24.3732	35.6298
0.246094	0.413216	0.550282	0.756392	0.970396	1.14661	1.48545	1.8038	2.46094	3.53655	4.97694	6.71227	8.72885	12.9871	18.6262	24.4427	35.7853
0.246094	0.413709	0.550381	0.758005	0.972331	1.14903	1.48605	1.81434	2.4616	3.54081	4.97786	6.72156	8.7455	12.9941	18.6545	24.4811	35.9106
0.246094	0.415938	0.550415	0.763762	0.976078	1.14996	1.48907	1.86224	2.4811	3.54718	4.97867	6.72703	8.77776	13.0314	18.6549	24.4998	35.9504
0.246094	0.416411	0.551913	0.766363	0.976249	1.15552	1.49041	1.87419	2.49731	3.55181	4.98302	6.76325	8.80903	13.043	18.6853	24.5663	36.0328
0.246094	0.416559	0.552503	0.769359	0.981391	1.15915	1.49693	1.87419	2.5029	3.56434	4.98742	6.79253	8.83564	13.0801	18.7177	24.5909	36.0598
0.246094	0.416762	0.560771	0.770454	0.984375	1.16812	1.49693	1.87419	2.50374	3.62668	5.01935	6.80662	8.86279	13.0986	18.7838	24.6696	36.0837
0.246094	0.417838	0.560985	0.773171	0.984375	1.17316	1.49693	1.89112	2.50967	3.65845	5.01985	6.81508	8.89349	13.1907	18.8531	24.8713	36.1867
0.246094	0.417892	0.563837	0.77681	0.984375	1.17519	1.49693	1.90246	2.51283	3.65845	5.04942	6.83607	8.9116	13.1931	19.0401	24.875	36.2744
0.246094	0.418913	0.565203	0.778217	0.984375	1.17926	1.49878	1.91352	2.52212	3.65845	5.04942	6.85952	8.91369	13.2982	19.0401	24.8896	36.3428
0.246094	0.421307	0.565432	0.778217	0.984375	1.18422	1.51315	1.91515	2.52473	3.66181	5.08736	6.86035	9.07036	13.3182	19.0452	24.9054	36.5635
0.246094	0.422751	0.567079	0.778217	0.984375	1.19711	1.51679	1.92205	2.53369	3.66305	5.13859	6.86421	9.08154	13.3209	19.084	25.0024	36.6008
0.246094	0.424908	0.570303	0.778217	0.984375	1.19879	1.5281	1.92847	2.54222	3.67669	5.16694	6.87991	9.08517	13.3459	19.1371	25.0468	36.7084
0.246094	0.425565	0.571796	0.778217	0.985926	1.20841	1.53552	1.93267	2.5524	3.69141	5.17382	6.93443	9.10879	13.3708	19.1463	25.145	36.7748
0.246094	0.425686	0.572188	0.778217	0.988352	1.21145	1.54	1.93367	2.55299	3.69141	5.17382	7.00395	9.12631	13.3731	19.17	25.151	36.7948
0.246094	0.42581	0.573725	0.778217	0.999507	1.21678	1.54243	1.95471	2.56259	3.70726	5.19558	7.04705	9.15058	13.3822	19.2016	25.3304	36.9214
0.246094	0.426647	0.575946	0.778217	1.00481	1.21827	1.54545	1.95987	2.56512	3.74602	5.19888	7.04705	9.24659	13.4724	19.3164	25.3715	37.0026
0.246094	0.428755	0.579369	0.778217	1.0099	1.22157	1.54731	1.96061	2.56929	3.74839	5.21463	7.05135	9.26372	13.5019	19.3305	25.3775	37.3353
0.246094	0.428951	0.579707	0.778217	1.01229	1.23047	1.55093	1.96485	2.61601	3.74839	5.23202	7.07172	9.30286	13.515	19.37	25.3775	37.3385
0.246094	0.429435	0.580128	0.778217	1.01303	1.23047	1.55643	1.96875	2.65051	3.74907	5.23737	7.09843	9.30607	13.5374	19.3848	25.5367	37.3615
0.246094	0.429664	0.581209	0.778217	1.01467	1.23047	1.55643	1.98407	2.65622	3.77411	5.27202	7.09843	9.36122	13.5632	19.4663	25.7471	37.4232
0.246094	0.431796	0.581743	0.778217	1.01467	1.23047	1.55643	1.98407	2.6791	3.77584	5.28193	7.10329	9.37097	13.5826	19.5594	25.841	37.4489
0.246094	0.4334	0.583826	0.778217	1.01467	1.23047	1.55643	1.98407	2.68635	3.79812	5.28219	7.14096	9.37097	13.6479	19.5934	25.8691	37.4839
0.246094	0.43568	0.584358	0.778217	1.01467	1.2312	1.55643	1.98631	2.69931	3.80737	5.32382	7.1748	9.40323	13.6876	19.6135	26.0065	37.4944
0.246094	0.435946	0.585726	0.778217	1.01467	1.23163	1.55643	1.98697	2.70365	3.8699	5.35663	7.1748	9.44343	13.7571	19.6359	26.0371	37.5518
0.246094	0.436424	0.585956	0.778217	1.01467	1.2321	1.55643	2.00648	2.70382	3.89108	5.37477	7.1748	9.46742	13.772	19.6937	26.0685	37.6025
0.246094	0.437149	0.586492	0.778217	1.01467	1.23714	1.55643	2.0108	2.70406	3.89108	5.39726	7.18261	9.616	13.7762	19.7995	26.0964	37.8731
0.246094	0.439504	0.586813	0.778217	1.01467	1.23944	1.55977	2.01519	2.70703	3.89108	5.44404	7.21771	9.65097	13.8323	19.8361	26.1808	37.9182
0.246094	0.440072	0.587449	0.778217	1.01467	1.24036	1.56046	2.02934	2.7078	3.89226	5.452	7.26198	9.68213	13.8351	19.8483	26.2168	38.0492
0.246094	0.440688	0.587478	0.778217	1.01467	1.24817	1.56658	2.03127	2.70892	3.90368	5.46417	7.26706	9.74828	13.8364	19.8539	26.2676	38.0716
0.246094	0.441322	0.58748	0.778217	1.02105	1.25253	1.56808	2.03132	2.71555	3.92884	5.56847	7.30861	9.78589	13.8454	19.8766	26.3228	38.1255
0.246094	0.441655	0.590694	0.778217	1.0311	1.25484	1.57577	2.05438	2.7169	3.95496	5.56847	7.31689	9.79774	13.8514	19.8815	26.3504	38.2753
0.246094	0.442501	0.594896	0.778217	1.03525	1.25484	1.57577	2.06192	2.71819	3.9705	5.6655	7.34879	9.82285	13.8699	19.9397	26.4651	38.429
0.246094	0.442574	0.60056	0.778217	1.04098	1.25484	1.57577	2.06853	2.73948	3.9896	5.6663	7.38281	9.84226	13.9212	19.9397	26.5565	38.4985
0.246094	0.44285	0.600638	0.781156	1.04409	1.25484	1.57577	2.07229	2.75141	4.00068	5.67043	7.41234	9.89229	13.9386	19.9397	26.5607	38.5019
0.246094	0.443234	0.60254	0.781349	1.04409	1.25484	1.58076	2.08477	2.75141	4.00152	5.68681	7.41237	9.933	13.9407	19.9423	26.6553	38.7151
0.246094	0.443455	0.603385	0.783661	1.04409	1.25484	1.582	2.08904	2.75658	4.00612	5.68771	7.44334	9.95692	14.0068	20.0003	26.697	38.7839
0.246094	0.443751	0.610448	0.783733	1.04409	1.25484	1.58864	2.10263	2.75777	4.00612	5.74512	7.46106	9.97211	14.0226	20.0124	26.702	38.8777
0.246094	0.444407	0.612527	0.789722	1.04409	1.25538	1.59034	2.12329	2.75935	4.00612	5.75944	7.49497	10.0201	14.0264	20.0447	26.702	38.9098
0.246094	0.445796	0.616448	0.79068	1.04488	1.2562	1.59891	2.14269	2.8059	4.03868	5.77723	7.50013	10.0472	14.0877	20.0774	26.8524	38.9186
0.246094	0.446497	0.619443	0.794964	1.04598	1.25711	1.60002	2.16014	2.8059	4.04198	5.80715	7.50124	10.0708	14.0955	20.1797	27.0759	39.0545
0.246094	0.447466	0.619562	0.796042	1.05295	1.25766	1.60704	2.17256	2.8059	4.05868	5.80787	7.51292	10.0928	14.3054	20.1812	27.0983	39.132
0.246094	0.447556	0.619609	0.799226	1.05868	1.26175	1.62324	2.17387	2.8233	4.06482	5.83403	7.51541	10.1168	14.3837	20.1812	27.1251	39.4518
0.246094	0.447669	0.620908	0.801053	1.06348	1.26248	1.62326	2.17627	2.83657	4.07358	5.83763	7.5491	10.183	14.4086	20.2037	27.1761	39.6952
0.246094	0.448156	0.620994	0.801639	1.06427	1.26568	1.62619	2.18498	2.86329	4.09256	5.83794	7.62595	10.1952	14.4086	20.2695	27.1801	39.9265
0.246094	0.44818	0.621899	0.804624	1.06437	1.28438	1.62772	2.19767	2.88045	4.10404	5.85053	7.62959	10.2154	14.5279	20.3128	27.2127	40.0009
0.246094	0.448371	0.623897	0.806417	1.0647	1.28677	1.63314	2.19915	2.88045	4.12869	5.87025	7.6589	10.2183	14.5555	20.3679	27.2287	40.0528
0.246094	0.449676	0.624231	0.807143	1.06689	1.29052	1.63878	2.20113	2.90392	4.15583	5.8711	7.66455	10.2261	14.5944	20.4927	27.2376	40.0928
0.246094	0.451118	0.625163	0.811815	1.0681	1.29414	1.6502	2.21049	2.94426	4.162	5.88097	7.67612	10.2801	14.6524	20.4989	27.4007	40.3171
0.246094	0.454313	0.626697	0.813793	1.0696	1.30296	1.65085	2.2111	2.95312	4.19376	5.92672	7.70374	10.2868	14.7072	20.5111	27.5085	40.3469
0.246094	0.454859	0.629386	0.816684	1.07558	1.30702	1.65565	2.22847	2.98295	4.19421	5.93088	7.70788	10.2878	14.743	20.5309	27.5523	40.6539
0.246094	0.459127	0.630278	0.818359	1.07568	1.31405	1.66321	2.22847	2.98665	4.20525	5.95016	7.77049	10.2979	14.7697	20.5507	27.6039	40.7968
0.246094	0.460457	0.630824	0.820171	1.07812	1.31808	1.66841	2.22883	2.99249	4.21245	5.95221	7.7981	10.3437	14.8573	20.5912	27.6163	41.2375
0.246094	0.460855	0.632242	0.821094	1.08408	1.3211	1.67791	2.2321	3.01509	4.21245	5.95638	7.8108	10.3468	14.9217	20.6044	27.6294	41.4491
0.246094	0.46453	0.634937	0.823047	1.08503	1.32526	1.68101	2.23793	3.03985	4.24824	5.96957	7.84977	10.355	14.9466	20.6283	27.7115	41.5057
0.246094	0.465249	0.635331	0.823999	1.09033	1.32526	1.69219	2.26229	3.04401	4.24824	5.99277	7.8666	10.3827	14.9491	20.6953	27.7556	41.5308
0.246094	0.465624	0.635795	0.82765	1.09229	1.32526	1.70181	2.26878	3.05338	4.25718	6.00985	7.8678	10.4467	14.9555	20.6953	27.9886	41.6684
0.246094	0.466422	0.636394	0.832131	1.09427	1.32526	1.71453	2.26887	3.05741	4.27779	6.01104	7.8688	10.4554	15.0193	20.7143	28.072	42.0006
0.246094	0.467227	0.636556	0.83745	1.09584	1.32526	1.71503	2.26887	3.06075	4.30762	6.01722	7.94391	10.464	15.0842	20.7654	28.1237	42.3166
0.246094	0.467304	0.636832	0.840236	1.09737	1.32526	1.72826	2.26887	3.07768	4.33407	6.04584	7.94976	10.5421	15.1403	20.7669	28.1831	42.3882
0.246094	0.474585	0.638568	0.841157	1.09764	1.32526	1.73128	2.28114	3.08355	4.33759	6.05311	7.97793	10.5498	15.1483	20.8014	28.199	42.4014
0.246094	0.475286	0.642016	0.841987	1.0986	1.32526	1.73399	2.2948	3.10671	4.35384	6.08839	7.97908	10.5849	15.2011	20.9631	28.2408	42.5215
0.246094	0.475385	0.647525	0.843511	1.10013	1.32608	1.73802	2.30156	3.10687	4.35927	6.11284	7.992	10.5849	15.2386	21.0234	28.3692	42.559
0.246094	0.476326	0.652917	0.844736	1.10056	1.34252	1.74015	2.30157	3.12226	4.38247	6.13281	8.00467	10.5935	15.3073	21.1648	28.498	42.5785
0.246094	0.478177	0.655004	0.845422	1.10056	1.34488	1.74015	2.30914	3.12388	4.38446	6.13661	8.03488	10.5975	15.3502	21.1655	28.7707	42.7021
0.246094	0.479035	0.656149	0.849832	1.10056	1.34662	1.74015	2.31235	3.13226	4.43276	6.15234	8.04617	10.6307	15.455	21.2341	28.8098	43.0559
0.246094	0.479238	0.656435	0.855188	1.10056	1.34833	1.74015	2.32164	3.13226	4.45328	6.15234	8.06121	10.6842	15.5993	21.2831	28.8445	43.176
0.246094	0.479949	0.657927	0.862169	1.10056	1.35179	1.74015	2.32164	3.14704	4.46533	6.21113	8.14103	10.6872	15.6037	21.3235	29.0557	43.2243
0.246094	0.481621	0.660008	0.863359	1.10056	1.35668	1.74015	2.3253	3.14992	4.49079	6.2227	8.19421	10.6959	15.6794	21.3257	29.0603	43.3356
0.246094	0.481677	0.660048	0.864251	1.10056	1.35929	1.74274	2.32923	3.15154	4.52438	6.2306	8.25142	10.8409	15.7688	21.3436	29.1057	43.3488
0.246094	0.48189	0.664761	0.86849	1.10056	1.36202	1.75224	2.33102	3.15581	4.5325	6.30308	8.2557	10.8533	15.798	21.3691	29.1594	43.3886
0.246094	0.48611	0.66544	0.870293	1.10056	1.36484	1.76434	2.33465	3.17532	4.54275	6.30308	8.26645	10.8684	15.8605	21.4045	29.164	43.4368
0.246094	0.487851	0.667361	0.870387	1.10064	1.372	1.76488	2.33508	3.17685	4.57128	6.31472	8.27951	10.8955	15.9411	21.4102	29.311	43.6281
0.246094	0.488016	0.668738	0.870787	1.10882	1.38021	1.77032	2.35649	3.19922	4.5739	6.32702	8.30548	10.9753	16.0131	21.5132	29.3358	43.9097
0.246094	0.489323	0.67458	0.870914	1.12141	1.38455	1.77427	2.35708	3.20867	4.57761	6.32998	8.33645	10.9891	16.0433	21.6089	29.3859	43.9372
0.246094	0.489489	0.68016	0.871234	1.12203	1.38795	1.77453	2.37345	3.20867	4.57761	6.34835	8.33714	10.9947	16.0719	21.6367	29.5196	43.9682
0.246094	0.492188	0.682013	0.871862	1.12226	1.39212	1.77461	2.37541	3.25869	4.62338	6.37748	8.34274	11.0395	16.0886	21.6618	29.6105	43.9834
0.246094	0.492188	0.682685	0.873094	1.12599	1.3937	1.77461	2.38723	3.2833	4.62368	6.39058	8.35632	11.1043	16.1319	21.6689	29.6537	44.2052
0.246094	0.492188	0.686964	0.878237	1.12654	1.40502	1.77461	2.38776	3.2942	4.6315	6.4291	8.35775	11.113	16.2407	21.7037	29.6717	44.2422
0.246094	0.492188	0.689498	0.883285	1.12734	1.42878	1.77688	2.39379	3.30535	4.65346	6.44472	8.38165	11.1259	16.3609	21.7247	29.6836	44.2695
0.246094	0.492188	0.692308	0.885011	1.13367	1.43182	1.77804	2.39649	3.30553	4.6594	6.44526	8.38945	11.1858	16.3611	21.8151	29.7356	44.3105
0.246739	0.492188	0.692352	0.887304	1.14585	1.43358	1.78015	2.39788	3.30606	4.6693	6.45967	8.3997	11.2067	16.3907	21.8151	29.9032	44.3529
0.246851	0.492188	0.693467	0.887304	1.14599	1.43496	1.79027	2.40098	3.31558	4.677	6.45967	8.41623	11.2236	16.5319	21.8335	29.99	44.4007
0.247723	0.492188	0.693619	0.887304	1.14941	1.43496	1.79159	2.40102	3.34724	4.70161	6.47372	8.4177	11.2366	16.5323	21.8636	30.1322	44.4198
0.248578	0.492188	0.693625	0.887304	1.16159	1.43496	1.79159	2.42254	3.34724	4.70559	6.50529	8.4177	11.2451	16.6022	21.8913	30.2199	44.7627
0.248637	0.492188	0.695206	0.887304	1.16275	1.43496	1.79159	2.42344	3.34724	4.71074	6.52365	8.47101	11.2897	16.6418	22.0402	30.2452	44.9941
0.248687	0.492188	0.696058	0.887304	1.1639	1.43496	1.79295	2.42374	3.34724	4.71787	6.53842	8.48577	11.3402	16.6564	22.069	30.3489	45.3621
0.248964	0.492188	0.696058	0.887304	1.16673	1.44796	1.80201	2.4362	3.34724	4.72443	6.55275	8.48991	11.4272	16.7388	22.095	30.5523	45.4293
0.250048	0.492188	0.696058	0.887304	1.16721	1.45489	1.81469	2.4362	3.36148	4.72851	6.58462	8.49647	11.4564	16.7958	22.1238	30.5919	45.516
0.250605	0.492188	0.696058	0.887304	1.16758	1.45893	1.81999	2.43684	3.36559	4.73073	6.58635	8.49687	11.4594	16.847	22.1348	30.6377	45.5273
0.251523	0.492188	0.696058	0.887304	1.17154	1.46159	1.82633	2.44873	3.39362	4.75286	6.58867	8.50004	11.4735	16.8588	22.1826	30.6738	45.6071
0.25186	0.492188	0.696058	0.892307	1.18301	1.46173	1.8285	2.46094	3.40385	4.76008	6.61202	8.53204	11.485	16.8803	22.3417	30.7197	45.8197
0.252249	0.492188	0.696058	0.896579	1.18598	1.4632	1.84639	2.46094	3.40967	4.76628	6.62628	8.54268	11.4889	16.9144	22.3802	30.9929	45.8759
0.252269	0.492188	0.696058	0.901855	1.19347	1.46344	1.86336	2.46094	3.43298	4.77093	6.63244	8.56866	11.5349	16.9358	22.3959	31.02	45.9748
0.252462	0.492188	0.696058	0.903178	1.1936	1.4647	1.86953	2.46094	3.44531	4.77828	6.64322	8.58362	11.5955	16.9809	22.4219	31.1797	45.9958
0.253133	0.492188	0.696058	0.907393	1.20841	1.4755	1.87419	2.46966	3.45409	4.77828	6.64909	8.58511	11.5958	16.9828	22.4526	31.3124	46.0326
0.25347	0.492188	0.696058	0.908492	1.21905	1.47656	1.88664	2.47321	3.45409	4.81127	6.67119	8.59569	11.616	16.9999	22.4539	31.4224	46.2034
0.253875	0.492188	0.69622	0.909264	1.21912	1.47656	1.8898	2.47321	3.46933	4.81871	6.6781	8.59981	11.6206	17.0517	22.6219	31.4951	46.3186
0.253974	0.492188	0.696349	0.91005	1.22018	1.47656	1.89815	2.47321	3.47359	4.84322	6.69447	8.695	11.6733	17.0567	22.6366	31.6122	46.3761
0.254204	0.492188	0.697475	0.913206	1.22696	1.47965	1.90722	2.49587	3.47618	4.84748	6.7203	8.69575	11.6843	17.2547	22.6527	31.7164	46.5073
0.254462	0.492188	0.699248	0.913386	1.23047	1.4859	1.91523	2.49664	3.47673	4.85373	6.72156	8.69725	11.745	17.3055	22.7261	31.8172	46.669
0.254948	0.492188	0.700319	0.918243	1.23047	1.49151	1.92205	2.51724	3.48029	4.87241	6.7575	8.70886	11.8213	17.3256	22.8602	31.8344	46.6859
0.256749	0.492188	0.702557	0.922853	1.23047	1.49295	1.92205	2.5236	3.48029	4.89335	6.7575	8.72172	12.0555	17.4279	22.8986	31.8389	46.9515
0.257179	0.492188	0.702824	0.92405	1.23047	1.49693	1.94227	2.53369	3.50382	4.90001	6.77093	8.75948	12.0686	17.5004	22.9124	31.8537	47.0548
0.257193	0.492188	0.703793	0.926814	1.23047	1.49693	1.95326	2.54067	3.50594	4.90338	6.7888	8.76315	12.0757	17.5376	22.9146	31.9577	47.1599
0.257496	0.492188	0.705611	0.931183	1.23047	1.49693	1.95637	2.54698	3.51184	4.90668	6.80662	8.76435	12.1328	17.5574	22.9198	32.0158	47.3524
0.258144	0.492188	0.709628	0.93141	1.23047	1.49693	1.95657	2.56104	3.517	4.91464	6.8129	8.78386	12.2405	17.5832	22.9712	32.15	47.367
0.258932	0.492188	0.710982	0.932928	1.23047	1.49716	1.97108	2.56974	3.52353	4.91547	6.89502	8.79419	12.3587	17.7205	23.0121	32.2203	47.9886
0.260979	0.492188	0.712248	0.934415	1.23047	1.50606	1.98407	2.57052	3.52353	4.92188	6.90988	8.83542	12.3737	17.7341	23.0436	32.3967	48.7581
0.261005	0.492188	0.712903	0.940128	1.23047	1.51226	1.98407	2.60268	3.52536	4.92802	6.93006	8.86292	12.3758	17.7461	23.0463	32.5713	49.2833
0.261255	0.492188	0.714311	0.943399	1.23047	1.51635	1.98407	2.61601	3.53339	4.92802	6.96058	8.87304	12.5484	17.7802	23.1289	32.6029	49.4275
0.26216	0.492188	0.715645	0.944258	1.23047	1.52088	1.98407	2.63116	3.57224	4.94721	6.96493	8.87645	12.5686	17.8227	23.1655	32.6221	49.7919
0.262325	0.492188	0.717236	0.944789	1.23252	1.52911	1.98407	2.65051	3.57434	4.97187	6.96493	8.87645	12.6373	17.8566	23.1707	32.7231	50.1313
0.26328	0.493888	0.722264	0.945325	1.23385	1.53088	1.9902	2.65917	3.57621	4.99183	6.96762	8.91588	12.6376	17.8984	23.1711	32.7694	50.4294
0.264178	0.496086	0.725118	0.948929	1.23778	1.53888	1.99097	2.67061	3.59089	5.01422	6.98137	8.91729	12.673	17.899	23.1743	32.7758	50.4438
0.264362	0.497046	0.725499	0.958782	1.24185	1.54267	2.00672	2.67382	3.60224	5.01935	6.98315	8.92277	12.7462	17.9159	23.223	32.7934	50.9238
0.26595	0.501172	0.727843	0.961627	1.24489	1.54805	2.00858	2.68129	3.61363	5.06548	7.03449	8.93237	12.7647	17.9243	23.2539	32.9803	51.715
0.266054	0.502231	0.728014	0.966658	1.25008	1.55034	2.01212	2.68368	3.69141	5.07335	7.09843	8.9612	12.7673	17.9252	23.353	33.0215	52.2363
0.266925	0.503227	0.729367	0.971523	1.25445	1.55643	2.03026	2.6878	3.69216	5.07335	7.11397	8.96464	12.79	17.9716	23.3906	33.0823	52.4842
0.267193	0.503538	0.733385	0.971556	1.25484	1.55643	2.03128	2.68929	3.72407	5.07335	7.12996	8.97132	12.8081	17.9959	23.4629	33.1047	52.5171
0.268017	0.505154	0.73385	0.975176	1.25484	1.55643	2.05118	2.70703	3.73324	5.11121	7.1748	8.98584	12.8577	18.1033	23.5955	33.22	52.5951
0.269114	0.5057	0.735746	0.975341	1.25484	1.56053	2.05409	2.71819	3.74906	5.11919	7.18745	8.98749	12.8935	18.1276	23.7053	33.2593	53.3774
0.269771	0.506222	0.735885	0.976915	1.25484	1.56555	2.07067	2.73782	3.75063	5.12088	7.22765	9.01187	12.9169	18.151	23.736	33.3037	56.118
0.270267	0.507039	0.736393	0.979336	1.25484	1.57174	2.0745	2.74784	3.75646	5.12088	7.23783	9.01532	12.9253	18.2026	23.7643	33.3887	57.6946
0.271524	0.510114	0.736781	0.981865	1.25484	1.57577	2.07471	2.75372	3.75646	5.15256	7.23783	9.05507	12.9709	18.2856	23.7949	33.5167	58.7237
0.272383	0.513801	0.737897	0.981977	1.25484	1.57577	2.07752	2.75592	3.75666	5.19135	7.23783	9.09998	12.9871	18.3181	23.9028	33.6669	60.9321
0.272697	0.513997	0.738281	0.983524	1.25484	1.57577	2.08607	2.7838	3.78274	5.19135	7.2395	9.10414	12.9871	18.3913	24.0089	33.6925	64.0452
0.27278	0.518465	0.738281	0.984375	1.25484	1.57577	2.08817	2.79044	3.7845	5.19135	7.28715	9.10547	13.0314	18.4569	24.0639	33.6981	66.1492
0.273497	0.51928	0.738281	0.984375	1.25484	1.57577	2.08817	2.8059	3.79402	5.21094	7.28787	9.10879	13.0801	18.4627	24.1184	34.0411	67.4639
0.273557	0.523663	0.738281	0.984375	1.25484	1.57577	2.09126	2.8059	3.7975	5.23463	7.31689	9.16364	13.1078	18.4898	24.1373	34.0749	68.5037
0.273857	0.525609	0.738281	0.984375	1.25484	1.5773	2.09339	2.8059	3.81401	5.25318	7.31689	9.19593	13.1263	18.5536	24.2418	34.088	70.2645
0.27439	0.52628	0.738281	0.984375	1.25484	1.58441	2.10263	2.80669	3.81463	5.28386	7.35213	9.20079	13.1295	18.562	24.2824	34.1219	70.468
0.275329	0.52762	0.738281	0.984375	1.25484	1.59234	2.10263	2.815	3.8181	5.29917	7.37824	9.22847	13.1562	18.5727	24.3247	34.2451	71.4593
0.27667	0.530124	0.738281	0.984375	1.25734	1.59313	2.1119	2.84058	3.8204	5.31897	7.38439	9.26372	13.1907	18.6074	24.3645	34.3435	71.9236
0.276673	0.531457	0.738281	0.984375	1.25893	1.59973	2.12367	2.86992	3.8204	5.32468	7.40292	9.29304	13.1907	18.6076	24.4316	34.4161	72.5428
0.276916	0.532157	0.738281	0.985656	1.26482	1.60232	2.12418	2.88045	3.82907	5.40164	7.40329	9.30286	13.2251	18.6387	24.4365	34.4501	73.2469
0.277203	0.532687	0.738281	0.9905	1.26541	1.60935	2.12889	2.88045	3.84142	5.4183	7.4725	9.31446	13.2982	18.6545	24.4365	34.5691	73.2798
0.279272	0.532842	0.738281	0.994772	1.26886	1.61941	2.13146	2.886	3.87433	5.43639	7.4725	9.31448	13.306	18.7096	24.7105	34.5722	73.9763
0.279588	0.533333	0.740431	1.00319	1.28155	1.62081	2.13925	2.88876	3.878	5.43752	7.47614	9.37097	13.3708	18.7436	24.7493	34.5964	74.314
0.279657	0.534032	0.747192	1.00438	1.28602	1.63082	2.14717	2.88903	3.89108	5.46417	7.48049	9.38075	13.4003	18.7613	24.7578	34.6663	74.7662
0.279849	0.535004	0.747228	1.00441	1.2861	1.63272	2.15372	2.89342	3.89108	5.46417	7.48465	9.4275	13.4468	18.7637	24.7688	34.805	75.075
0.281566	0.537798	0.74869	1.00541	1.29331	1.63509	2.16218	2.91246	3.89108	5.46417	7.48465	9.4632	13.4813	18.767	24.7713	34.8213	75.5205
0.28195	0.538336	0.750728	1.01109	1.29548	1.63951	2.17153	2.91871	3.91588	5.53027	7.48465	9.47767	13.4903	18.778	24.7713	34.8281	76.0263
0.283521	0.539257	0.754112	1.01113	1.29637	1.6492	2.18227	2.92762	3.92185	5.53027	7.48972	9.48905	13.515	18.9092	24.7786	34.8759	76.6223
0.283725	0.539771	0.763534	1.01342	1.29646	1.65085	2.18496	2.92862	3.94443	5.53027	7.49164	9.49616	13.5416	18.9108	24.8138	34.8841
0.284043	0.539923	0.764182	1.01454	1.29662	1.65085	2.18519	2.93985	3.95104	5.55405	7.49678	9.49853	13.5441	18.93	24.875	35.015
0.284113	0.539994	0.764947	1.01467	1.29792	1.65085	2.18577	2.94708	3.95412	5.55775	7.50124	9.55294	13.562	18.9368	24.8896	35.0198
0.284341	0.540245	0.766985	1.01467	1.29792	1.65085	2.18641	2.96243	3.95496	5.56847	7.50542	9.58503	13.5709	18.9628	24.9224	35.0462
0.28598	0.541041	0.768724	1.01467	1.30115	1.65085	2.18885	2.96336	4.0038	5.58098	7.50906	9.59453	13.591	18.9937	25.078	35.1045
0.286381	0.543594	0.769241	1.01467	1.32341	1.66489	2.19591	2.96336	4.00612	5.60743	7.51032	9.62601	13.6443	19.0178	25.1178	35.1274
0.286735	0.544166	0.769413	1.01467	1.32526	1.67645	2.19594	2.98969	4.00612	5.6118	7.51292	9.63478	13.7307	19.0782	25.1209	35.193
0.286871	0.544278	0.772181	1.01467	1.32526	1.68256	2.20113	2.99386	4.00612	5.62597	7.5491	9.67589	13.7681	19.1969	25.1976	35.2481
0.287438	0.549131	0.7726	1.01467	1.32526	1.68918	2.20113	2.99754	4.02657	5.64132	7.55114	9.71657	13.8543	19.2016	25.4085	35.2533
0.28798	0.549986	0.776345	1.01467	1.32526	1.68961	2.20113	3.00396	4.03051	5.6655	7.55408	9.72366	13.9212	19.2016	25.4478	35.2746
0.288424	0.550282	0.778217	1.01467	1.32526	1.69599	2.20198	3.01227	4.03064	5.6655	7.57993	9.7248	13.9212	19.2032	25.5058	35.3219
0.289551	0.550282	0.778217	1.01467	1.32526	1.70656	2.21484	3.04666	4.03337	5.6655	7.58113	9.75911	13.9255	19.252	25.5329	35.3297
0.290018	0.550282	0.778217	1.01467	1.32526	1.70817	2.21688	3.05733	4.03624	5.67677	7.60648	9.76391	13.9529	19.2677	25.6375	35.411
0.290606	0.550282	0.778217	1.01467	1.32526	1.72266	2.22174	3.05749	4.03752	5.68152	7.63287	9.78965	13.9906	19.296	25.754	35.452
0.291063	0.550282	0.778217	1.01467	1.32526	1.72266	2.22847	3.08806	4.03795	5.70743	7.63287	9.7975	14.0446	19.349	25.7612	35.5
0.291467	0.550282	0.778217	1.01467	1.32526	1.72266	2.23918	3.09824	4.0411	5.7081	7.6408	9.79897	14.075	19.3606	25.7998	35.7345
0.29172	0.550282	0.778217	1.01467	1.32526	1.7255	2.25374	3.13226	4.05012	5.72399	7.65872	9.82721	14.122	19.4048	25.8445	35.8979
0.291771	0.550282	0.778217	1.01467	1.32526	1.74015	2.26618	3.15154	4.0649	5.72399	7.66119	9.89958	14.1327	19.4803	25.8949	35.9002
0.292033	0.550282	0.778217	1.01467	1.32586	1.74452	2.26887	3.15364	4.07817	5.77613	7.7053	9.90948	14.2301	19.4912	26.0069	36.0035
0.293238	0.550282	0.778217	1.01477	1.33132	1.75783	2.26887	3.15494	4.07825	5.77835	7.72358	9.91511	14.2862	19.4928	26.1149	36.0315
0.29386	0.550282	0.778217	1.01494	1.33657	1.75853	2.26887	3.1683	4.09789	5.78868	7.7256	9.95868	14.2993	19.5594	26.2768	36.0685
0.295073	0.550282	0.778217	1.02186	1.34262	1.75908	2.26887	3.19219	4.11706	5.80787	7.73264	9.96478	14.3099	19.6006	26.3814	36.1012
0.29795	0.550282	0.778217	1.02626	1.34437	1.76126	2.27189	3.19784	4.12196	5.87025	7.77049	9.97621	14.3327	19.6012	26.4098	36.3264
0.298393	0.550282	0.778217	1.02727	1.34521	1.76818	2.28281	3.19922	4.12869	5.88521	7.85313	9.99836	14.4443	19.6166	26.5424	36.6021
0.299904	0.550282	0.778217	1.03458	1.34605	1.77461	2.2854	3.19922	4.13232	5.89382	7.87884	10.0237	14.4984	19.6618	26.5561	36.6467
0.30212	0.550282	0.778217	1.03548	1.36195	1.77461	2.30214	3.20018	4.15517	5.90585	7.89037	10.0417	14.5279	19.7013	26.5893	36.6506
0.30395	0.550282	0.778217	1.03912	1.36933	1.77461	2.30827	3.20621	4.16491	5.91855	7.90953	10.0755	14.559	19.7013	26.5895	36.689
0.304675	0.550282	0.778217	1.0427	1.37048	1.77461	2.30985	3.20867	4.16784	5.93036	7.93512	10.1043	14.6612	19.9579	26.7711	36.7123
0.305092	0.550282	0.778217	1.04342	1.37057	1.78513	2.32021	3.20867	4.18359	5.95221	7.93628	10.1168	14.7266	19.9591	26.8344	36.7133
0.305997	0.550282	0.778217	1.04384	1.37334	1.78611	2.32164	3.20867	4.20651	5.95221	7.94391	10.1317	14.7406	19.982	26.8648	36.7983
0.307087	0.550282	0.778217	1.04409	1.38814	1.79093	2.32164	3.23272	4.21698	5.96717	7.9559	10.1515	14.7667	20.1017	26.868	36.8016
0.307668	0.550282	0.778217	1.04409	1.38969	1.79159	2.32164	3.24114	4.22335	5.9801	7.97055	10.1973	14.7857	20.1767	26.9447	36.9714
0.307719	0.550282	0.778217	1.04409	1.39212	1.79159	2.33301	3.25169	4.22421	6.00791	7.97055	10.2269	14.8168	20.1783	26.974	37.0817
0.308478	0.550282	0.778217	1.04573	1.39212	1.7916	2.33558	3.26471	4.24563	6.01456	8.01129	10.262	14.8237	20.1797	27.0748	37.2188
0.309474	0.550282	0.778217	1.04845	1.39212	1.79952	2.39775	3.2833	4.25735	6.05311	8.02747	10.2683	14.8413	20.1887	27.1323	37.2448
0.310251	0.550282	0.780569	1.05026	1.3988	1.80095	2.40614	3.29262	4.27521	6.05504	8.03112	10.3679	14.8612	20.1932	27.1849	37.2985
0.310687	0.550282	0.781119	1.05123	1.40038	1.8083	2.41291	3.30802	4.30184	6.07058	8.04564	10.3704	14.9693	20.2934	27.3341	37.7534
0.310797	0.550282	0.784616	1.05539	1.40603	1.80896	2.42082	3.30876	4.30488	6.07807	8.06121	10.4012	14.9814	20.3495	27.4215	37.8221
0.311489	0.550282	0.785575	1.05735	1.41168	1.81429	2.42374	3.31085	4.30488	6.09473	8.06245	10.4207	15.0842	20.3679	27.439	38.0547
0.312927	0.550282	0.786113	1.0657	1.41251	1.82192	2.42374	3.31085	4.33372	6.10385	8.07248	10.4484	15.0972	20.3963	27.59	38.0905
0.313007	0.550282	0.786153	1.06702	1.41316	1.82984	2.4303	3.32267	4.36893	6.11284	8.07353	10.6277	15.0982	20.4258	27.7136	38.1902
0.314474	0.550282	0.788457	1.06779	1.4175	1.83656	2.4342	3.34024	4.38157	6.16709	8.09203	10.6628	15.2201	20.4273	27.7563	38.3022
0.314906	0.550282	0.789162	1.08252	1.42091	1.83679	2.4378	3.34445	4.39339	6.17992	8.1145	10.722	15.2757	20.4601	27.7598	38.3401
0.317156	0.550282	0.792087	1.08748	1.42427	1.83822	2.46094	3.34751	4.39477	6.20963	8.11736	10.7791	15.3383	20.5458	27.7989	38.4901
0.318456	0.550282	0.79774	1.08777	1.42999	1.8434	2.46094	3.38078	4.40226	6.21057	8.11757	10.8027	15.3764	20.6044	27.8129	38.533
0.319809	0.550364	0.798397	1.08873	1.43438	1.84463	2.46094	3.38759	4.42969	6.21113	8.12482	10.8566	15.3843	20.6382	27.8255	38.5699
0.320131	0.550389	0.799245	1.08874	1.43496	1.84944	2.46094	3.38957	4.45258	6.21113	8.1364	10.9436	15.3938	20.6424	27.826	38.8111
0.320473	0.550917	0.802093	1.08912	1.43496	1.85007	2.46108	3.39451	4.45695	6.26043	8.15087	10.9864	15.5371	20.6602	27.8309	38.9999
0.321601	0.554564	0.8062	1.10056	1.43496	1.85503	2.47321	3.40355	4.48125	6.27851	8.17332	11.03	15.6207	20.6602	27.9277	39.4679
0.321718	0.554864	0.807103	1.10056	1.44649	1.8666	2.47321	3.41106	4.49079	6.28154	8.1848	11.0304	15.6657	20.6953	27.9487	39.5323
0.321867	0.555007	0.808406	1.10056	1.44954	1.87419	2.47321	3.41948	4.49079	6.2865	8.19914	11.0523	15.7776	20.7143	27.992	39.6668
0.323033	0.558613	0.809936	1.10056	1.45277	1.87419	2.47321	3.41951	4.49637	6.29566	8.22533	11.06	15.7892	20.768	28.0817	39.8709
0.323191	0.559358	0.81231	1.10056	1.45466	1.87419	2.47321	3.42769	4.52438	6.32054	8.2365	11.1035	15.8394	20.8055	28.0817	40.0861
0.323693	0.559655	0.816303	1.10056	1.45734	1.88192	2.49328	3.44531	4.53774	6.32705	8.24073	11.1179	15.9506	20.8178	28.3095	40.1904
0.323865	0.561157	0.818788	1.10056	1.46238	1.88364	2.50117	3.44546	4.58143	6.33172	8.24079	11.1424	15.9961	20.9357	28.3122	40.2974
0.324464	0.562836	0.819382	1.10056	1.46454	1.88795	2.53369	3.45409	4.59741	6.33744	8.24472	11.2479	15.9981	20.9397	28.4245	40.2981
0.324811	0.564736	0.823812	1.10134	1.46808	1.89098	2.53938	3.4573	4.60215	6.35094	8.25171	11.2721	16.0245	21.0461	28.5723	40.3061
0.325295	0.567044	0.827834	1.10183	1.46915	1.89712	2.54976	3.45923	4.60882	6.41734	8.25424	11.3198	16.0433	21.1139	28.6139	40.5166
0.325412	0.56725	0.827875	1.10476	1.47282	1.89745	2.5517	3.51184	4.65346	6.48513	8.27611	11.4506	16.1076	21.1154	28.6328	40.7506
0.325901	0.570261	0.830208	1.11322	1.47656	1.89906	2.56067	3.51662	4.67296	6.48834	8.27836	11.4612	16.1168	21.15	28.6496	40.8658
0.325971	0.572935	0.83149	1.11411	1.47896	1.9054	2.56929	3.52353	4.68225	6.54867	8.30152	11.4886	16.1243	21.1655	28.712	40.8938
0.3262	0.573433	0.835079	1.11554	1.48727	1.90567	2.56929	3.52353	4.68225	6.58953	8.30179	11.5481	16.1768	21.2004	28.732	40.933
0.326419	0.57618	0.836692	1.11726	1.49522	1.90642	2.57861	3.52353	4.71629	6.62171	8.30179	11.6767	16.2291	21.2512	28.9999	41.0001
0.32673	0.576866	0.837561	1.11889	1.49693	1.91658	2.57914	3.52353	4.73371	6.62628	8.31145	11.6775	16.3019	21.2554	29.0856	41.1
0.328419	0.57736	0.838142	1.1211	1.49693	1.92205	2.59033	3.52353	4.73371	6.65947	8.36719	11.6879	16.3493	21.2796	29.1312	41.3115
0.329148	0.578754	0.83869	1.1225	1.49693	1.92609	2.61601	3.52353	4.77616	6.6799	8.36832	11.7179	16.5048	21.2967	29.2065	41.3796
0.329178	0.579265	0.838958	1.12979	1.49693	1.93333	2.61601	3.52759	4.77828	6.68542	8.39347	11.7766	16.5048	21.3504	29.2382	41.4505
0.330061	0.581933	0.842354	1.14202	1.50013	1.93458	2.61601	3.52878	4.77828	6.69447	8.42489	11.7938	16.5539	21.4	29.3079	41.4516
0.332031	0.583176	0.843447	1.14249	1.50272	1.93719	2.63317	3.53857	4.81002	6.69447	8.43074	11.8072	16.6036	21.4229	29.3508	41.6139
0.332479	0.583745	0.84404	1.14267	1.503	1.94205	2.64607	3.56144	4.81817	6.71705	8.47556	11.8452	16.6167	21.4342	29.3843	41.7102
0.332551	0.584237	0.845115	1.14378	1.50371	1.94325	2.64945	3.56254	4.84748	6.71705	8.47721	11.9149	16.6304	21.4681	29.3994	41.7475
0.333018	0.586994	0.847286	1.15033	1.50683	1.96225	2.65051	3.5672	4.85136	6.72156	8.49374	11.972	16.6546	21.5567	29.5569	41.7816
0.333169	0.58768	0.850736	1.1514	1.52254	1.96254	2.65051	3.568	4.85373	6.72613	8.52379	12.0183	16.7362	21.5806	29.5855	41.9097
0.333928	0.588674	0.851891	1.16165	1.53136	1.96669	2.65348	3.57729	4.85373	6.75125	8.52849	12.0183	16.7633	21.6618	29.6493	41.9667
0.335245	0.589836	0.852329	1.16224	1.53733	1.96875	2.65622	3.57885	4.90338	6.7575	8.53949	12.0784	16.7723	21.6912	29.6786	42.133
0.335642	0.591101	0.85234	1.16521	1.54549	1.97576	2.66191	3.58318	4.92802	6.77719	8.54632	12.0986	16.791	21.7288	29.6886	42.2078
0.338787	0.592019	0.855623	1.1705	1.54674	1.97705	2.66457	3.61239	4.94642	6.86152	8.55502	12.0987	16.8588	21.7956	29.8169	42.3174
0.339137	0.594105	0.857518	1.17246	1.55076	1.98407	2.67449	3.63353	4.94642	6.89482	8.593	12.1058	16.8677	21.8636	29.8271	42.3582
0.339682	0.597874	0.860938	1.17527	1.55092	1.98407	2.68379	3.64544	4.9652	6.91333	8.63015	12.1487	16.8803	21.97	29.9356	42.4244
0.339981	0.59939	0.863096	1.17844	1.55105	1.98407	2.70703	3.65845	4.97694	6.92001	8.63632	12.1487	16.8875	21.9727	30.0278	42.5251
0.340437	0.599709	0.865652	1.18261	1.55239	1.99012	2.7117	3.65845	4.98302	6.9246	8.64486	12.1544	16.9144	21.981	30.0781	42.6282
0.34155	0.602537	0.865734	1.19002	1.55307	2.00893	2.71488	3.68288	5.01597	6.93003	8.64985	12.181	16.9188	22.0347	30.128	42.6453
0.342237	0.603696	0.867128	1.19989	1.5545	2.00969	2.71652	3.69141	5.01935	6.93006	8.68132	12.2183	16.9519	22.0624	30.1454	42.6474
0.3438	0.604637	0.869187	1.20531	1.55518	2.01187	2.71819	3.69141	5.01935	6.95301	8.68847	12.2696	17.009	22.0676	30.2192	42.8168
0.344314	0.608831	0.874451	1.21119	1.55643	2.01453	2.71819	3.70101	5.03492	6.96493	8.71316	12.2998	17.0267	22.1717	30.2979	42.8488
0.34496	0.609799	0.878201	1.21346	1.55643	2.01781	2.71819	3.72004	5.03531	6.96493	8.75651	12.3077	17.0342	22.1759	30.3053	42.8585
0.34497	0.614783	0.879595	1.21596	1.55643	2.01967	2.72498	3.72407	5.04708	6.96493	8.8029	12.344	17.0797	22.2983	30.4182	42.9227
0.345074	0.616488	0.887304	1.21672	1.55643	2.02343	2.72888	3.72407	5.06355	6.99336	8.8217	12.4019	17.1177	22.3964	30.4283	42.9722
0.345447	0.625256	0.887304	1.22234	1.55871	2.02934	2.73022	3.72407	5.06738	6.99963	8.82346	12.4187	17.2072	22.4148	30.4643	42.9784
0.346237	0.626559	0.887304	1.22244	1.56455	2.02934	2.7319	3.74839	5.08675	7.02517	8.84908	12.4247	17.2705	22.4391	30.4869	43.0559
0.348029	0.62848	0.887304	1.22335	1.56622	2.02934	2.74465	3.7486	5.08989	7.04262	8.85553	12.4395	17.2705	22.4539	30.5333	43.0664
0.348029	0.629902	0.887304	1.224	1.56623	2.02934	2.75141	3.75189	5.12743	7.06378	8.85609	12.4731	17.2705	22.4957	30.5368	43.0945
0.348029	0.634369	0.887304	1.23043	1.57232	2.03706	2.75141	3.75646	5.15423	7.07681	8.87645	12.4751	17.2845	22.5132	30.5448	43.1065
0.348029	0.634977	0.887304	1.23047	1.57296	2.03981	2.75298	3.76451	5.18222	7.08766	8.89416	12.4952	17.2897	22.5401	30.5989	43.1086
0.348029	0.637634	0.887304	1.23047	1.57577	2.04526	2.77565	3.76451	5.18736	7.12114	8.91729	12.5024	17.3345	22.5575	30.6217	43.1626
0.348029	0.638881	0.887304	1.23047	1.57577	2.04969	2.78278	3.81595	5.18748	7.13672	8.95795	12.5484	17.3684	22.5616	30.6954	43.1682
0.348029	0.639893	0.887304	1.23047	1.58008	2.06944	2.79112	3.8204	5.19996	7.13672	8.98754	12.6278	17.3753	22.6406	30.8831	43.1851
0.348029	0.640158	0.887304	1.23047	1.58292	2.07349	2.79518	3.8204	5.2076	7.15287	8.99036	12.6373	17.4049	22.7407	30.9222	43.26
0.348029	0.640395	0.887304	1.23047	1.58855	2.07587	2.8015	3.82625	5.2099	7.16636	8.99281	12.6541	17.4049	22.7434	30.9889	43.3921
0.348029	0.640784	0.887304	1.23047	1.59719	2.0777	2.8059	3.82832	5.22044	7.21306	9.02866	12.6685	17.4178	22.7443	31.1905	43.4368
0.348029	0.641475	0.888755	1.23047	1.59911	2.08148	2.8059	3.83633	5.25001	7.24571	9.04453	12.7043	17.431	22.774	31.2677	43.5384
0.348029	0.645498	0.895551	1.23047	1.60019	2.08701	2.81067	3.84411	5.26062	7.26833	9.07883	12.708	17.4571	22.8338	31.3237	43.5871
0.348029	0.646931	0.895579	1.23047	1.6006	2.10263	2.81141	3.84564	5.26664	7.30447	9.0975	12.7188	17.4779	22.8496	31.3555	43.7244
0.348029	0.650737	0.900043	1.23047	1.60136	2.10394	2.81448	3.85198	5.28386	7.32073	9.17568	12.7898	17.4796	22.892	31.4095	43.7459
0.348029	0.652695	0.904279	1.23047	1.6046	2.10728	2.81556	3.86073	5.32382	7.34168	9.18293	12.7969	17.4878	22.9343	31.4424	43.8441
0.348029	0.653484	0.908597	1.23047	1.61915	2.10981	2.81921	3.88291	5.32382	7.34223	9.22982	12.7976	17.5491	22.9343	31.5397	43.9372
0.348029	0.654383	0.911002	1.23774	1.61915	2.11698	2.8238	3.91891	5.37355	7.40329	9.23476	12.8182	17.5593	23.0029	31.6078	43.9607
0.348029	0.656068	0.912002	1.23902	1.62047	2.11698	2.83161	3.93426	5.38085	7.43957	9.23505	12.8212	17.6014	23.0425	31.6733	44.1013
0.348029	0.656307	0.91489	1.24361	1.62615	2.11698	2.83716	3.94518	5.39726	7.44815	9.29667	12.8465	17.6787	23.0579	31.6775	44.1229
0.348029	0.6569	0.93168	1.24477	1.62649	2.12306	2.84453	3.94518	5.41297	7.44815	9.30286	12.8667	17.7281	23.1001	31.7332	44.2422
0.348029	0.656979	0.935979	1.24667	1.62722	2.12633	2.85868	3.95496	5.43639	7.46571	9.31588	12.8818	17.7753	23.1707	32.0617	44.2729
0.348029	0.659642	0.937022	1.24813	1.63861	2.13184	2.86067	3.96534	5.44752	7.58113	9.32396	12.8935	17.8702	23.1969	32.0846	44.402
0.348029	0.659655	0.939092	1.25274	1.64406	2.13739	2.86662	3.96814	5.46417	7.59709	9.3548	12.8935	17.8978	23.2285	32.0952	44.5627
0.348029	0.660314	0.939373	1.25393	1.64581	2.13918	2.86855	3.96814	5.50086	7.62554	9.35505	12.9474	17.9243	23.2813	32.2044	45.2147
0.348029	0.661552	0.941418	1.25414	1.64595	2.14787	2.88045	3.96814	5.50282	7.64477	9.37128	13.1003	17.9665	23.3413	32.2877	45.4537
0.348029	0.662848	0.944191	1.25484	1.6474	2.15746	2.91059	3.97219	5.50282	7.64757	9.39638	13.1143	17.9799	23.353	32.31	45.5672
0.348029	0.663589	0.944506	1.25484	1.65085	2.1724	2.91562	3.97445	5.50282	7.6733	9.42022	13.1194	17.98	23.4068	32.332	45.8926
0.348029	0.664319	0.946884	1.25484	1.65085	2.17828	2.95312	3.9752	5.50335	7.69179	9.42253	13.1332	18.0426	23.4255	32.3385	46.4005
0.348029	0.66575	0.956216	1.25484	1.65085	2.17982	2.95607	3.97577	5.5128	7.70788	9.44964	13.1746	18.0707	23.4664	32.3475	46.4361
0.348029	0.668247	0.958156	1.25484	1.65085	2.18506	2.95786	3.98751	5.53027	7.71099	9.46388	13.2982	18.1677	23.4732	32.4663	46.5501
0.348029	0.669309	0.962814	1.25484	1.65085	2.20113	2.96336	4.03959	5.53027	7.7164	9.62043	13.3274	18.2053	23.5042	32.4944	46.9495
0.348029	0.671105	0.964447	1.25484	1.65085	2.20113	2.96336	4.06079	5.55926	7.71953	9.62439	13.3459	18.2259	23.8317	32.4996	47.3724
0.348029	0.671669	0.966438	1.25484	1.65085	2.20113	2.96336	4.0983	5.57816	7.72518	9.69273	13.4341	18.2342	23.8762	32.5115	47.7448
0.348029	0.67211	0.966465	1.25484	1.65174	2.20305	2.96336	4.09996	5.61719	7.7275	9.70313	13.4562	18.2922	23.8825	32.6131	48.0489
0.348029	0.673671	0.969789	1.2679	1.65349	2.21069	2.98162	4.11446	5.61719	7.78535	9.70745	13.5352	18.3059	23.9432	32.6502	48.1507
0.348029	0.676645	0.970511	1.28549	1.65807	2.21484	2.99386	4.11968	5.61893	7.81221	9.76495	13.6244	18.4455	24.0024	32.6881	48.26
0.348029	0.678647	0.980263	1.28621	1.65926	2.22216	3.00396	4.12039	5.63542	7.81711	9.77648	13.6682	18.4488	24.0845	32.6934	48.3278
0.348029	0.679797	0.98073	1.28714	1.66819	2.22336	3.00396	4.12528	5.70554	7.82098	9.79065	13.7218	18.5062	24.1678	32.8782	48.4773
0.348029	0.679849	0.980891	1.28976	1.66978	2.22847	3.03014	4.12528	5.71072	7.82098	9.80677	13.7507	18.5291	24.2299	32.9682	48.4859
0.348029	0.680849	0.983114	1.2963	1.67098	2.23184	3.0494	4.12696	5.717	7.82098	9.86214	13.7725	18.5617	24.2462	33.0509	48.8072
0.348029	0.685537	0.984375	1.29927	1.67252	2.23752	3.05895	4.13805	5.7539	7.83259	9.90814	13.8558	18.5628	24.2481	33.0619	48.9677
0.348029	0.688387	0.984375	1.30423	1.67281	2.23889	3.07986	4.14735	5.76616	7.84804	9.95692	13.8899	18.58	24.2686	33.1256	49.0328
0.348029	0.688543	0.984375	1.30481	1.6744	2.23992	3.08355	4.17635	5.78871	7.84804	9.96334	13.9386	18.6772	24.3214	33.1314	49.1954
0.348029	0.689344	0.984375	1.30672	1.67724	2.24402	3.08355	4.18904	5.84447	7.85189	9.96769	13.9891	18.7717	24.4579	33.1314	51.617
0.348029	0.690389	0.984375	1.31098	1.68307	2.24761	3.09085	4.19083	5.8612	7.86495	10.0331	13.9993	18.7823	24.5169	33.1825	54.0656
0.348029	0.694035	0.984375	1.31285	1.69706	2.25648	3.10051	4.19392	5.87025	7.87884	10.0441	14.0295	18.8209	24.6106	33.2168	54.3824
0.348029	0.69407	0.984375	1.31531	1.70193	2.26329	3.10645	4.19905	5.91137	7.91037	10.0889	14.0348	18.8226	24.8592	33.311	55.8069
0.348029	0.694195	0.984375	1.31809	1.70554	2.26887	3.10708	4.21077	5.92672	7.98839	10.0944	14.0468	18.8385	24.8664	33.332	58.2647
0.348029	0.696058	0.984989	1.31973	1.70713	2.26887	3.10748	4.21194	5.92672	8.04323	10.1083	14.0963	18.9508	24.9151	33.3949	60.5007
0.348029	0.696058	0.996523	1.32123	1.70727	2.28914	3.11287	4.21245	5.94712	8.04413	10.1377	14.1648	18.9748	24.9929	33.4688	63.0329
0.348029	0.696058	1.00035	1.32526	1.70984	2.29137	3.11287	4.21245	5.95221	8.04976	10.1377	14.1791	18.9987	25.0931	33.4995	63.6483
0.348029	0.696058	1.00187	1.32526	1.72266	2.30051	3.15029	4.21396	5.95221	8.06121	10.1884	14.1985	19.0256	25.1064	33.6111	63.965
0.348029	0.696058	1.0028	1.32526	1.72266	2.30215	3.15688	4.21982	5.98772	8.06121	10.1894	14.2182	19.1527	25.2914	33.6222	64.0758
0.348029	0.696058	1.0029	1.32526	1.74015	2.3061	3.15962	4.23464	5.99277	8.08303	10.1924	14.2819	19.1969	25.313	33.6609	64.6356
0.348029	0.696058	1.00347	1.32526	1.74015	2.32164	3.16033	4.24024	5.99598	8.12085	10.2801	14.32	19.2205	25.409	33.6973	64.8863
0.348029	0.696058	1.00415	1.32526	1.74015	2.3242	3.16121	4.252	6.00791	8.12482	10.4359	14.3348	19.267	25.4314	33.6996	65.7717
0.348029	0.696058	1.00596	1.32526	1.74015	2.32976	3.1683	4.26981	6.01437	8.13816	10.4451	14.3369	19.276	25.4964	33.7723	65.7923
0.348029	0.696058	1.01389	1.32925	1.74015	2.33465	3.17191	4.2764	6.0303	8.15458	10.4467	14.3369	19.3164	25.5193	33.783	66.4673
0.348029	0.696058	1.01467	1.33572	1.75453	2.33465	3.19709	4.28418	6.07494	8.15924	10.464	14.3596	19.376	25.5367	33.9454	66.7498
0.348029	0.696058	1.01467	1.33619	1.7592	2.33465	3.19922	4.30429	6.07807	8.17351	10.4929	14.3683	19.3839	25.5938	33.9592	66.9872
0.348029	0.696058	1.01467	1.33658	1.76123	2.33465	3.20867	4.30488	6.08232	8.18328	10.5391	14.3731	19.3899	25.6127	34.0855	67.3879
0.348923	0.696058	1.01467	1.34098	1.76187	2.33465	3.20867	4.35252	6.11235	8.18497	10.5849	14.484	19.42	25.6443	34.0935	68.0296
0.349929	0.696058	1.01467	1.34605	1.76343	2.33605	3.20867	4.37729	6.15234	8.20779	10.5852	14.5279	19.4211	25.6517	34.1219	68.1619
0.350339	0.696058	1.01467	1.3574	1.77461	2.35058	3.23686	4.37912	6.1878	8.24655	10.6089	14.5279	19.4306	25.9568	34.2283	68.6226
0.351033	0.696058	1.01467	1.35929	1.77461	2.35341	3.26436	4.38157	6.19172	8.25424	10.6519	14.5455	19.4601	25.9754	34.2362	69.1387
0.351247	0.696058	1.01467	1.36729	1.77461	2.35651	3.31085	4.39665	6.19599	8.25475	10.7122	14.5944	19.4803	25.9929	34.2389	70.1879
0.351358	0.696058	1.01467	1.37174	1.77734	2.36807	3.31266	4.40272	6.19648	8.26592	10.7995	14.6193	19.4974	26.065	34.2531	71.2871
0.354964	0.696058	1.01467	1.37404	1.77816	2.41553	3.31648	4.40904	6.20267	8.29905	10.8126	14.6215	19.5176	26.1027	34.2746	72.5891
0.355278	0.696058	1.01467	1.37425	1.77918	2.42374	3.32649	4.42426	6.21113	8.30179	10.8644	14.7266	19.5207	26.1968	34.2767	73.8063
0.357025	0.696058	1.01467	1.3768	1.78653	2.42374	3.34724	4.42482	6.2328	8.317	10.8644	14.7267	19.586	26.3424	34.3423	74.8215
0.357172	0.696058	1.01467	1.37931	1.78933	2.42516	3.34724	4.42969	6.23438	8.31757	10.8728	14.7598	19.6166	26.4193	34.3827
0.358248	0.696215	1.01467	1.38028	1.79103	2.4362	3.34724	4.43458	6.23553	8.35995	10.8728	14.8658	19.6268	26.4448	34.3964
0.359814	0.697457	1.01467	1.39	1.79159	2.44147	3.34724	4.43652	6.26452	8.35995	10.894	14.9814	19.629	26.5884	34.4236
0.361077	0.700079	1.01558	1.3901	1.79159	2.4586	3.36436	4.43652	6.27418	8.35995	10.9882	15.0198	19.689	26.5884	34.631
0.362558	0.700884	1.01584	1.3911	1.79159	2.46094	3.37112	4.45447	6.27418	8.36032	10.9972	15.0297	19.7013	26.6653	34.668
0.365344	0.701034	1.01683	1.39212	1.79159	2.46094	3.37419	4.45695	6.30308	8.36613	11.0223	15.0575	19.8042	26.6769	34.7027
0.366169	0.708516	1.02108	1.39212	1.79159	2.46094	3.37494	4.49079	6.35094	8.38165	11.0388	15.1437	19.8117	26.6895	34.7275
0.36661	0.710793	1.02216	1.39212	1.80718	2.47202	3.38005	4.49079	6.35094	8.38165	11.1179	15.2201	19.8407	26.702	34.8292
0.366876	0.711762	1.0224	1.39212	1.82116	2.47321	3.38095	4.49079	6.35928	8.38859	11.1288	15.2201	19.8496	26.7223	35.0031
0.369115	0.711879	1.03317	1.39403	1.8263	2.47321	3.39114	4.51768	6.36677	8.39323	11.1416	15.2538	19.8628	26.8524	35.0042
0.369211	0.712727	1.03346	1.3965	1.82657	2.47321	3.39182	4.51768	6.38422	8.39325	11.1424	15.2598	19.9321	26.8632	35.077
0.369211	0.717989	1.03883	1.3971	1.82674	2.48758	3.41515	4.52438	6.38422	8.3997	11.1424	15.3103	19.9351	26.8682	35.0915
0.369211	0.719999	1.04197	1.39811	1.83202	2.49174	3.41884	4.53585	6.39526	8.40966	11.1722	15.3133	19.964	26.9226	35.3123
0.369328	0.726472	1.04409	1.4056	1.84103	2.494	3.42595	4.53774	6.39844	8.4177	11.1932	15.3291	20.0326	27.0983	35.3417
0.36986	0.730266	1.04409	1.40698	1.85007	2.49587	3.42769	4.58763	6.40724	8.42105	11.2135	15.3291	20.0461	27.1875	35.4759
0.373875	0.730728	1.04409	1.4089	1.86307	2.5077	3.43408	4.59741	6.41141	8.42489	11.2135	15.3291	20.068	27.3037	35.5816
0.37758	0.734992	1.04409	1.41215	1.86431	2.50967	3.45409	4.61214	6.42479	8.43074	11.2459	15.4118	20.1451	27.3474	35.6692
0.378297	0.737827	1.04409	1.41727	1.87419	2.51081	3.45409	4.64329	6.46395	8.44893	11.2622	15.4177	20.1797	27.3835	35.9021
0.378462	0.738281	1.04409	1.43015	1.87419	2.51643	3.47563	4.64329	6.46684	8.45469	11.323	15.4589	20.1812	27.3903	36.1589
0.380244	0.738281	1.04409	1.43317	1.87419	2.52647	3.47735	4.64557	6.50172	8.45718	11.4543	15.4652	20.2024	27.4215	36.2232
0.381149	0.738281	1.04409	1.43411	1.87419	2.5305	3.48029	4.6559	6.5303	8.45718	11.4718	15.4961	20.2812	27.4284	36.2272
0.381541	0.738281	1.04409	1.43496	1.88254	2.53369	3.48029	4.6693	6.53887	8.48144	11.5252	15.5039	20.3224	27.4679	36.3561
0.382028	0.738281	1.04409	1.43496	1.90273	2.53369	3.49638	4.69576	6.54241	8.48577	11.5271	15.5117	20.3946	27.4712	36.6688
0.382339	0.738281	1.04706	1.43496	1.90459	2.53369	3.49704	4.70063	6.55275	8.51724	11.5564	15.5215	20.4317	27.5055	36.8062
0.382716	0.738281	1.05767	1.43496	1.9131	2.55775	3.51184	4.70137	6.55726	8.51842	11.5949	15.5351	20.4628	27.5113	36.9346
0.385109	0.738281	1.06135	1.43496	1.92205	2.56929	3.52353	4.70161	6.60339	8.53204	11.6268	15.5527	20.4791	27.5636	37.187
0.385756	0.738281	1.06482	1.43496	1.92205	2.56929	3.52353	4.70961	6.60797	8.54268	11.6324	15.5633	20.485	27.5801	37.4273
0.387455	0.738281	1.07112	1.43496	1.92205	2.57885	3.52665	4.73371	6.62171	8.56163	11.6408	15.5706	20.4983	27.6181	37.533
0.391924	0.738281	1.07624	1.43496	1.92601	2.60608	3.53607	4.74084	6.62628	8.5713	11.6603	15.5741	20.5145	27.6784	37.7005
0.391987	0.738281	1.07903	1.43544	1.92925	2.61601	3.53681	4.75286	6.64453	8.57447	11.6733	15.6851	20.5296	27.7462	37.7196
0.394128	0.740023	1.07912	1.43587	1.93119	2.61601	3.53924	4.77111	6.64909	8.59164	11.6794	15.6966	20.6088	27.801	37.8329
0.395049	0.742213	1.07983	1.43732	1.93182	2.61601	3.5425	4.77828	6.64909	8.59569	11.7265	15.7014	20.6786	27.8115	37.9112
0.395326	0.742362	1.08197	1.44257	1.93569	2.62423	3.58318	4.79182	6.69223	8.59971	11.7426	15.7379	20.7072	27.8797	37.9623
0.395565	0.755527	1.08693	1.44529	1.9475	2.65051	3.59798	4.83498	6.69456	8.61069	11.7766	15.8439	20.7435	27.8868	38.1477
0.39808	0.755786	1.08744	1.45095	1.95285	2.65051	3.62574	4.83678	6.71705	8.61328	11.7843	15.8497	20.7494	27.9036	38.351
0.398182	0.757772	1.08805	1.45496	1.95359	2.66191	3.63883	4.84669	6.71705	8.61328	11.8227	15.8516	20.7654	28.0263	38.3901
0.399723	0.770506	1.08941	1.45671	1.95623	2.66259	3.65703	4.85373	6.72303	8.64136	11.833	15.8989	20.7902	28.0684	38.3973
0.401906	0.771524	1.08974	1.47057	1.95972	2.66364	3.65845	4.88496	6.73926	8.65225	11.833	15.9069	20.8866	28.0919	38.4324
0.402645	0.772132	1.09166	1.47075	1.96875	2.67881	3.66588	4.92113	6.74713	8.66182	11.8381	15.9411	20.8933	28.128	38.5245
0.40266	0.772503	1.09391	1.47656	1.96875	2.6905	3.67171	4.92188	6.75366	8.70073	11.8425	15.9961	20.9194	28.4379	38.5268
0.402758	0.773336	1.09637	1.47656	1.96875	2.70703	3.67443	4.92188	6.80617	8.70302	11.8503	16.0433	20.97	28.4454	38.6086
0.402799	0.774018	1.09644	1.47656	1.9738	2.71251	3.68673	4.92802	6.83769	8.70646	11.8534	16.049	21.0119	28.456	38.785
0.403152	0.778217	1.09855	1.47656	1.97619	2.71819	3.68715	4.93871	6.8655	8.73016	11.8534	16.1028	21.091	28.564	38.8563
0.405696	0.778217	1.10056	1.47656	1.9833	2.71819	3.69141	4.94642	6.89062	8.76824	11.8699	16.1224	21.1039	28.6411	39.0863
0.406293	0.778217	1.10056	1.48127	1.98407	2.71819	3.69297	4.96395	6.89502	8.78386	11.9044	16.2315	21.1404	28.6416	39.1444
0.40749	0.778217	1.10056	1.48734	1.98407	2.72888	3.6996	4.97694	6.91873	8.78386	12.0101	16.2452	21.1655	28.6983	39.1916
0.407865	0.778217	1.10056	1.49266	1.98407	2.72964	3.6996	4.98302	6.92468	8.79516	12.0158	16.2544	21.1698	28.7217	39.2093
0.408604	0.778217	1.10056	1.49273	1.98407	2.75128	3.6996	5.02841	6.93006	8.80021	12.0533	16.3925	21.1992	28.725	39.225
0.409011	0.778217	1.10056	1.49693	1.98407	2.75141	3.69979	5.03029	6.96058	8.81139	12.0661	16.3992	21.1998	28.7419	39.2271
0.409853	0.778217	1.10056	1.49693	1.99351	2.75595	3.72085	5.04942	6.9953	8.81139	12.0686	16.4165	21.222	28.7558	39.2761
0.41459	0.778217	1.10056	1.49693	2.00152	2.76213	3.73168	5.06738	6.99963	8.8217	12.0934	16.422	21.2412	28.7693	39.286
0.418548	0.778217	1.10056	1.49693	2.00213	2.77039	3.74066	5.07021	7.04705	8.88991	12.1354	16.4242	21.2412	28.7794	39.4128
0.4209	0.778217	1.10056	1.49693	2.00456	2.78095	3.74839	5.07335	7.05135	8.90152	12.186	16.432	21.264	28.7802	39.4195
0.421183	0.778217	1.10075	1.49693	2.00597	2.78689	3.7557	5.08573	7.06607	8.98158	12.2183	16.4574	21.301	28.7884	39.4512
0.421194	0.778217	1.10157	1.49693	2.01392	2.79477	3.75908	5.11886	7.07145	9.02454	12.2183	16.578	21.3983	28.8043	39.4564
0.421967	0.778217	1.11322	1.49745	2.02934	2.8059	3.76451	5.13142	7.07147	9.07549	12.2603	16.5849	21.4455	28.814	39.4666
0.422944	0.778217	1.11365	1.50184	2.02934	2.8059	3.79344	5.16043	7.10269	9.08098	12.3071	16.5926	21.461	28.8205	39.5495
0.425523	0.778217	1.11666	1.50276	2.02934	2.8059	3.81415	5.17382	7.1057	9.0845	12.3282	16.5981	21.4793	28.8295	39.5913
0.425795	0.778217	1.12079	1.50295	2.0328	2.82562	3.82832	5.19135	7.15367	9.08682	12.3587	16.5992	21.5038	28.8748	39.6486
0.42841	0.778217	1.12658	1.50479	2.03408	2.83455	3.85198	5.2057	7.15828	9.10736	12.3661	16.6081	21.5567	28.8759	39.7502
0.428667	0.778217	1.13405	1.50703	2.03501	2.83983	3.85198	5.21252	7.1748	9.13203	12.3856	16.6123	21.589	28.9702	39.9287
0.430189	0.778217	1.13509	1.52273	2.04205	2.86992	3.85198	5.21337	7.1748	9.14486	12.4149	16.636	21.6073	28.9723	39.9317
0.43037	0.778217	1.13895	1.53021	2.04406	2.86992	3.85757	5.21463	7.1748	9.15522	12.505	16.6364	21.6227	29.1392	39.9761
0.431286	0.778217	1.13979	1.53427	2.05019	2.88045	3.87603	5.21463	7.18004	9.21011	12.5085	16.6484	21.7037	29.2067	40.0498
0.431466	0.778217	1.14589	1.53453	2.06093	2.90262	3.87819	5.2594	7.18453	9.21782	12.5315	16.6626	21.7441	29.2653	40.2399
0.43599	0.778217	1.14707	1.53627	2.0717	2.92795	3.89108	5.26439	7.18745	9.23353	12.5508	16.6854	21.774	29.2676	40.3901
0.438839	0.778217	1.15409	1.54213	2.07849	2.93697	3.89108	5.26664	7.23783	9.26093	12.5725	16.7344	21.7859	29.344	40.4021
0.439821	0.778217	1.15642	1.55339	2.0864	2.94437	3.90498	5.27138	7.24202	9.26699	12.5755	16.7416	21.8468	29.3603	40.4501
0.442376	0.778217	1.16146	1.55444	2.08817	2.94837	3.94518	5.28137	7.26629	9.2715	12.6158	16.9501	21.8705	29.3693	40.4781
0.443334	0.778217	1.16164	1.55489	2.09286	2.95312	3.94518	5.32382	7.2799	9.29269	12.6565	16.9715	21.8734	29.387	40.5546
0.444676	0.778217	1.1693	1.55491	2.10263	2.95312	3.94988	5.32382	7.32024	9.33135	12.6685	16.9965	21.9023	29.4871	40.5667
0.445252	0.778217	1.17689	1.55597	2.10263	2.95415	3.9594	5.32382	7.33625	9.4185	12.7447	17.1469	21.941	29.5086	40.7097
0.445849	0.778217	1.18572	1.55643	2.11698	2.95853	3.96604	5.34501	7.33969	9.43882	12.7613	17.1914	21.981	29.5169	40.8026
0.446812	0.778217	1.18831	1.55643	2.11698	2.96336	3.96814	5.37477	7.33985	9.45095	12.7684	17.2336	22.0431	29.6342	40.8137
0.448218	0.778217	1.19211	1.55643	2.11994	2.96336	3.97456	5.41965	7.34168	9.46812	12.79	17.2705	22.059	29.6408	40.8256
0.448361	0.778217	1.19291	1.55643	2.1323	2.96336	3.97577	5.42761	7.34168	9.48725	12.8148	17.2832	22.0958	29.6562	40.8731
0.450186	0.778217	1.19862	1.55643	2.13939	2.96336	3.99975	5.42937	7.34168	9.49616	12.8394	17.2915	22.125	29.8062	40.879
0.450629	0.778217	1.20416	1.56263	2.13992	2.96336	4.00612	5.43639	7.34168	9.52707	12.9123	17.3107	22.1737	29.8916	40.8963
0.451293	0.778217	1.2095	1.56327	2.15677	2.96733	4.00612	5.46417	7.3992	9.55655	12.9474	17.3387	22.2643	29.9687	40.9449
0.451403	0.778217	1.21408	1.56391	2.16345	2.9707	4.00612	5.46417	7.4049	9.64045	12.9476	17.4008	22.2766	29.9898	41.021
0.452247	0.778217	1.2159	1.56566	2.17042	2.97356	4.00735	5.48753	7.48465	9.648	12.9637	17.4755	22.3265	30.0053	41.0446
0.454164	0.778473	1.21651	1.57577	2.19476	2.98075	4.0292	5.50282	7.53304	9.648	12.9685	17.4809	22.5808	30.0527	41.1534
0.457365	0.78816	1.21913	1.57577	2.20113	2.98846	4.03522	5.51208	7.54376	9.648	12.9928	17.5004	22.5817	30.1598	41.199
0.457471	0.788792	1.21942	1.57577	2.20113	2.99386	4.07358	5.51312	7.54564	9.68875	12.9941	17.5349	22.6399	30.2304	41.2631
0.457811	0.790017	1.22221	1.57577	2.20423	3.00729	4.08678	5.52702	7.55864	9.76964	12.9941	17.5832	22.6406	30.3903	41.5111
0.458251	0.79766	1.22356	1.57577	2.21145	3.02159	4.09582	5.53027	7.58113	9.80059	13.0034	17.6127	22.7487	30.4332	41.6015
0.459078	0.798734	1.22765	1.59554	2.21484	3.02853	4.12047	5.53065	7.5876	9.80159	13.0208	17.6176	22.8496	30.5057	41.6139
0.460479	0.800287	1.22974	1.60835	2.21484	3.04344	4.12987	5.556	7.59107	9.81376	13.043	17.6715	22.8655	30.5166	41.6684
0.462551	0.814944	1.23047	1.60902	2.21484	3.04401	4.1474	5.57933	7.60107	9.85605	13.1012	17.7205	22.9079	30.5698	41.6814
0.463029	0.817131	1.23047	1.61615	2.2167	3.04882	4.16166	5.6118	7.66455	9.90508	13.1055	17.7341	22.9361	30.5931	41.7236
0.46339	0.818535	1.23047	1.62614	2.22089	3.04883	4.16261	5.61535	7.69347	9.92036	13.1447	17.7912	22.9393	30.6473	41.7939
0.463732	0.819218	1.23047	1.62913	2.2249	3.05491	4.17635	5.62258	7.72047	9.92036	13.2982	17.8315	23.0277	30.7063	41.8251
0.464711	0.821336	1.23047	1.63214	2.2281	3.06039	4.18359	5.64953	7.72358	9.97964	13.3302	17.9159	23.1539	30.7095	41.9097
0.464774	0.821778	1.23047	1.63417	2.22847	3.06972	4.18359	5.6655	7.77231	9.99335	13.3648	18.0053	23.223	30.742	42.0424
0.464991	0.823538	1.23047	1.63909	2.22847	3.07421	4.20171	5.6655	7.81916	10.0447	13.3675	18.0254	23.3361	30.7617	42.0792
0.467149	0.823997	1.23047	1.64781	2.22847	3.08355	4.22594	5.68152	7.82717	10.0496	13.3708	18.0506	23.3581	30.8099	42.0792
0.468655	0.825418	1.23047	1.64792	2.22847	3.08355	4.25022	5.72399	7.84183	10.0695	13.3889	18.0975	23.3675	30.8102	42.15
0.471047	0.826644	1.23047	1.65085	2.22847	3.09158	4.25731	5.72399	7.84956	10.0853	13.4341	18.1361	23.406	30.8355	42.1625
0.473179	0.827556	1.23047	1.65085	2.22847	3.10429	4.27088	5.73984	7.85764	10.0985	13.5033	18.1677	23.5472	30.9074	42.2035
0.47548	0.828688	1.23047	1.65085	2.23515	3.11287	4.30488	5.75846	7.87884	10.0988	13.5082	18.2608	23.5968	30.9955	42.2078
0.476158	0.831392	1.23047	1.65085	2.24031	3.12159	4.30488	5.75907	7.87884	10.1168	13.5313	18.2707	23.6263	31.0632	42.4175
0.476864	0.836282	1.23047	1.65085	2.26363	3.13226	4.30488	5.76091	7.88707	10.1377	13.5441	18.3305	23.6588	31.0858	42.4824
0.478005	0.840749	1.23047	1.65481	2.26887	3.14912	4.3267	5.76616	7.92916	10.1906	13.5709	18.3451	23.6791	31.1095	42.4995
0.478656	0.84194	1.23047	1.66359	2.26887	3.15146	4.32699	5.8002	7.94411	10.2414	13.5887	18.3649	23.7388	31.1224	42.5749
0.478935	0.843046	1.23047	1.68365	2.26887	3.15154	4.32965	5.81473	7.98573	10.2416	13.6089	18.3649	23.7388	31.1408	42.6645
0.48174	0.847247	1.23047	1.70083	2.26887	3.1616	4.36079	5.83403	7.99253	10.3301	13.6372	18.3765	23.866	31.2213	42.9657
0.483902	0.849753	1.23047	1.7173	2.27233	3.1683	4.36079	5.83403	8.00467	10.3506	13.7271	18.4718	24.0019	31.34	43.0773
0.484308	0.859055	1.23066	1.71967	2.27233	3.17269	4.36767	5.84371	8.01172	10.3623	13.7561	18.4718	24.1886	31.3822	43.4382
0.484745	0.85914	1.24183	1.72266	2.29948	3.1769	4.37476	5.87025	8.07248	10.3827	13.7571	18.4833	24.2468	31.397	43.5761
0.488047	0.85995	1.24183	1.72266	2.31599	3.18953	4.38157	5.87025	8.11155	10.4006	13.7681	18.498	24.3123	31.4172	43.7326
0.490587	0.86019	1.2441	1.72637	2.32164	3.19318	4.39784	5.88369	8.11365	10.4042	13.7724	18.544	24.3484	31.4711	43.7987
0.492188	0.863756	1.24606	1.73896	2.33465	3.20162	4.43652	5.89464	8.12109	10.4067	13.7747	18.5894	24.3683	31.5234	43.949
0.492188	0.866171	1.24654	1.74015	2.33465	3.2052	4.44069	5.89744	8.12482	10.4123	13.801	18.6155	24.3854	31.6033	43.9684
0.492188	0.868356	1.24843	1.74015	2.33465	3.20867	4.46478	5.91137	8.13599	10.4294	13.8164	18.6345	24.4513	31.6561	44.0763
0.492188	0.871264	1.24981	1.74015	2.33465	3.20867	4.50229	5.9165	8.14924	10.4304	13.8361	18.6772	24.5815	31.662	44.2889
0.492188	0.872443	1.25001	1.74015	2.34365	3.20867	4.50729	5.92023	8.17161	10.4467	13.8885	18.6772	24.6057	31.7175	44.3472
0.492188	0.875185	1.2536	1.74015	2.3716	3.22047	4.51768	5.95221	8.17988	10.5464	13.8922	18.6934	24.6057	31.8072	44.4242
0.492188	0.875536	1.25484	1.74015	2.37846	3.22878	4.52438	5.95221	8.19533	10.5486	13.9212	18.7138	24.6672	31.8124	44.4265
0.492188	0.876149	1.25484	1.74015	2.38941	3.23686	4.52438	5.95639	8.20584	10.575	13.9544	18.7177	24.677	31.8156	44.4368
0.492188	0.878344	1.25484	1.74015	2.39284	3.23866	4.52438	6.03306	8.24906	10.5762	13.9765	18.7386	24.8603	31.8185	44.4985
0.492188	0.879186	1.25484	1.74015	2.40039	3.26397	4.53774	6.05155	8.25338	10.5885	14.0081	18.8226	24.8697	31.8613	45.0252
0.492188	0.880792	1.25484	1.74015	2.40105	3.27505	4.53774	6.11002	8.25621	10.5935	14.0618	18.8386	24.8903	31.9572	45.2235
0.492188	0.88347	1.25484	1.74015	2.40254	3.27966	4.571	6.14159	8.25838	10.5935	14.0618	18.8948	24.9083	32.008	45.4821
0.492188	0.884395	1.26295	1.74015	2.42372	3.2833	4.57504	6.16243	8.2689	10.602	14.1628	18.9033	24.9455	32.013	45.6038
0.492188	0.887304	1.26724	1.74106	2.42374	3.29314	4.57603	6.172	8.27256	10.604	14.2481	18.9078	24.9648	32.0537	45.8009
0.492188	0.887304	1.27602	1.74336	2.42374	3.29384	4.57761	6.172	8.30483	10.6505	14.2569	18.9747	24.9818	32.1203	46.4208
0.492188	0.887304	1.27928	1.75066	2.42374	3.29882	4.59032	6.19228	8.31663	10.6789	14.2671	18.9923	24.9818	32.2558	47.0966
0.492188	0.887304	1.28474	1.77461	2.42374	3.30775	4.59697	6.20361	8.34576	10.6846	14.2756	18.9969	25.0234	32.2721	47.2256
0.492188	0.887304	1.28795	1.77461	2.42374	3.31021	4.59741	6.23012	8.3663	10.6892	14.2925	18.9987	25.0787	32.34	47.2378
0.492188	0.887304	1.29277	1.77461	2.44438	3.31085	4.60553	6.2306	8.36719	10.7548	14.2925	19.0114	25.0944	32.3601	49.5798
0.492188	0.887304	1.2945	1.77461	2.4603	3.31085	4.62368	6.26083	8.38165	10.7635	14.2927	19.0512	25.1124	32.3687	50.8833
0.492188	0.887304	1.29565	1.77461	2.46094	3.33108	4.62368	6.28305	8.38766	10.765	14.3073	19.0534	25.1808	32.3835	51.1366
0.492188	0.887304	1.29951	1.77461	2.46094	3.34381	4.63244	6.28865	8.38976	10.7851	14.3369	19.1214	25.2051	32.434	52.7502
0.492188	0.887304	1.30884	1.77461	2.46709	3.34724	4.64329	6.30308	8.39037	10.7999	14.3369	19.1701	25.3775	32.4713	55.0079
0.492188	0.887304	1.30894	1.77461	2.47321	3.34724	4.65435	6.30308	8.39698	10.8285	14.438	19.2016	25.3906	32.5886	57.8599
0.492188	0.887304	1.31038	1.77461	2.47321	3.34724	4.66156	6.3117	8.42489	10.8383	14.4613	19.241	25.3928	32.6341	59.3789
0.492188	0.887304	1.31097	1.77461	2.47321	3.34724	4.6734	6.31211	8.43541	10.8533	14.5279	19.2725	25.4085	32.6415	59.5091
0.492188	0.887304	1.3115	1.77461	2.47321	3.34724	4.67578	6.32705	8.47144	10.8588	14.5279	19.2787	25.4508	32.7206	59.5508
0.492188	0.887304	1.32184	1.77875	2.47321	3.36759	4.68225	6.35282	8.47298	10.8739	14.5626	19.4102	25.4573	32.7258	59.6956
0.492188	0.887304	1.32393	1.77883	2.47404	3.3708	4.69979	6.38422	8.47506	10.8978	14.5716	19.4476	25.4894	32.7651	59.9166
0.492188	0.887304	1.32526	1.78086	2.47841	3.37648	4.70161	6.39454	8.48241	10.8978	14.5944	19.452	25.5458	32.9689	60.0965
0.492188	0.887304	1.32526	1.7864	2.48585	3.3843	4.70161	6.40157	8.48591	10.9757	14.5944	19.4554	25.5476	33.0069	60.4332
0.492188	0.887304	1.32526	1.79159	2.49692	3.38918	4.70505	6.40317	8.48638	10.9935	14.5944	19.4888	25.6858	33.0261	60.4554
0.492188	0.887304	1.32526	1.79159	2.50281	3.395	4.70574	6.44089	8.51301	10.9981	14.6207	19.5027	25.7167	33.3013	60.569
0.492188	0.887304	1.32526	1.7971	2.50587	3.39839	4.71555	6.47123	8.5552	11.0194	14.6545	19.5176	25.7427	33.3322	60.6611
0.492188	0.887304	1.32526	1.79786	2.50967	3.39887	4.73371	6.4727	8.56038	11.0523	14.694	19.5271	25.7719	33.399	60.8617
0.492188	0.887304	1.32526	1.80123	2.50967	3.41884	4.74628	6.52903	8.56038	11.0752	14.7513	19.5408	25.8472	33.4117	60.8769
0.492188	0.887304	1.32526	1.81372	2.50967	3.42065	4.77828	6.53495	8.58071	11.077	14.7601	19.547	25.8586	33.4965	60.937
0.492188	0.887304	1.32526	1.85007	2.51456	3.42462	4.77828	6.53887	8.58201	11.0852	14.7738	19.5486	25.8691	33.4995	61.5905
0.492188	0.889613	1.32526	1.85414	2.51776	3.42769	4.77931	6.55275	8.58367	11.1116	14.7861	19.5999	25.9039	33.5853	61.7428
0.492188	0.890022	1.32786	1.86195	2.52194	3.42769	4.78007	6.56434	8.58779	11.1179	14.8003	19.6274	25.9365	33.7356	62.6253
0.492188	0.895207	1.3428	1.86271	2.52825	3.42769	4.84748	6.5666	8.59304	11.1424	14.8168	19.6373	25.9847	33.74	62.8312
0.492188	0.897966	1.34401	1.86983	2.53036	3.43823	4.85373	6.5666	8.6168	11.1722	14.8439	19.6378	26.0598	33.8725	63.6213
0.492188	0.899155	1.34415	1.87193	2.56929	3.45409	4.87952	6.6128	8.6168	11.1794	14.8658	19.6506	26.0917	33.9107	64.4009
0.492188	0.900884	1.34472	1.87419	2.5861	3.45409	4.8834	6.62038	8.635	11.1939	14.8669	19.7013	26.1763	33.9805	66.2622
0.492188	0.907036	1.34605	1.87419	2.60545	3.45409	4.88482	6.62628	8.6411	11.2263	14.8696	19.7121	26.2399	34.1113	68.0795
0.492188	0.909604	1.34966	1.87419	2.61081	3.46771	4.88528	6.68542	8.64162	11.2726	14.9252	19.7857	26.2626	34.2283	69.6756
0.492188	0.909671	1.35405	1.87419	2.61253	3.48029	4.92397	6.69108	8.64486	11.2908	14.9521	19.7888	26.2968	34.2734	71.2331
0.492188	0.910037	1.35766	1.87977	2.61601	3.48029	4.93874	6.69447	8.66314	11.3364	15.0258	19.8163	26.4379	34.321	72.5344
0.492188	0.912272	1.35898	1.88984	2.61601	3.48029	4.94642	6.70504	8.69922	11.3645	15.044	19.8407	26.4594	34.3897	73.4768
0.492188	0.915333	1.36429	1.89199	2.62206	3.49765	4.95138	6.72946	8.70073	11.3911	15.1742	19.8407	26.4622	34.4672
0.492188	0.916825	1.36557	1.90943	2.62891	3.49765	4.97047	6.7575	8.76505	11.3944	15.2201	19.8651	26.6258	34.5052
0.492188	0.921745	1.36961	1.91229	2.65051	3.49859	4.98302	6.7575	8.77003	11.4162	15.2201	19.8788	26.6467	34.87
0.492188	0.93022	1.3711	1.91734	2.65424	3.54659	4.98302	6.76326	8.78781	11.4612	15.2538	19.9321	26.6571	35.0189
0.492188	0.931943	1.37759	1.92205	2.65429	3.54921	4.98336	6.7888	8.79046	11.4666	15.2757	19.9336	26.7439	35.0984
0.492188	0.932738	1.37964	1.92205	2.65705	3.55591	5.01774	6.80333	8.8024	11.4718	15.3843	19.96	26.7936	35.2794
0.492188	0.934728	1.38082	1.92205	2.66191	3.58318	5.03335	6.8171	8.81139	11.4719	15.3891	19.9605	26.9447	35.2999
0.492188	0.936614	1.38157	1.92205	2.6687	3.598	5.05949	6.82439	8.82956	11.5121	15.4177	20.0396	26.9562	35.3314
0.493685	0.940946	1.38482	1.92205	2.67365	3.62657	5.06738	6.84211	8.84437	11.569	15.4393	20.0834	26.9647	35.3357
0.493745	0.942114	1.38585	1.93359	2.67867	3.63353	5.07335	6.84211	8.87645	11.569	15.4524	20.1451	26.9863	35.4483
0.494117	0.944198	1.3873	1.93838	2.69175	3.63353	5.09252	6.86421	8.88404	11.5978	15.4883	20.1764	26.9916	35.5135
0.498654	0.944466	1.39212	1.96875	2.69479	3.63353	5.09493	6.86421	8.95795	11.6395	15.4883	20.179	26.9989	35.5339
0.502829	0.95791	1.39212	1.96875	2.70204	3.66063	5.11211	6.89753	8.95795	11.6572	15.5117	20.1812	27.0103	35.553
0.503371	0.958606	1.39212	1.98024	2.7057	3.66679	5.13039	6.91154	8.96486	11.7131	15.5215	20.1812	27.0541	35.5535
0.506578	0.960805	1.39212	1.98407	2.70703	3.68363	5.13859	6.91304	9.0253	11.7327	15.5215	20.1857	27.0649	35.8742
0.508675	0.964614	1.39322	1.98407	2.72888	3.69141	5.14372	6.9184	9.0369	11.8176	15.6516	20.1927	27.1264	35.9297
0.511543	0.965243	1.39466	1.98407	2.73517	3.69328	5.17382	6.93006	9.04883	11.8227	15.7201	20.2228	27.1633	35.99
0.512227	0.968728	1.39853	1.98407	2.75141	3.6996	5.18384	6.95568	9.04997	11.833	15.7577	20.2316	27.2107	36.1188
0.516921	0.97022	1.39928	2.0012	2.75141	3.70798	5.19135	7.02532	9.11876	11.8683	15.7648	20.2426	27.2287	36.2244
0.517332	0.971659	1.40075	2.0025	2.75141	3.71877	5.19135	7.03845	9.12721	11.879	15.7999	20.2486	27.2996	36.3794
0.519883	0.974019	1.40153	2.0039	2.7529	3.72112	5.19135	7.04705	9.13535	11.8866	15.9031	20.3009	27.4556	36.4127
0.524145	0.984154	1.40994	2.00453	2.77789	3.73719	5.19135	7.04705	9.13918	11.8866	15.9128	20.318	27.5361	36.4219
0.524356	0.984375	1.42223	2.00598	2.78423	3.73967	5.20807	7.04705	9.15852	11.9044	15.9193	20.3366	27.6106	36.4227
0.524714	0.984375	1.42534	2.01379	2.78423	3.744	5.21463	7.08927	9.16681	11.9599	15.9909	20.3678	27.669	36.7332
0.528487	0.984375	1.42571	2.0214	2.79244	3.75298	5.22044	7.15046	9.17155	11.9842	16.0037	20.4019	27.6774	36.7529
0.531694	0.984375	1.42773	2.02313	2.79356	3.75646	5.22378	7.16636	9.18823	11.9961	16.0245	20.4031	27.6836	36.7867
0.532472	0.984375	1.42935	2.0292	2.8059	3.76126	5.23087	7.16704	9.19482	12.0083	16.0626	20.4785	27.6845	36.7902
0.534457	0.984375	1.43032	2.02934	2.81205	3.7663	5.24186	7.17303	9.20231	12.0183	16.1214	20.5042	27.7475	36.8163
0.535608	0.984375	1.43496	2.02934	2.81594	3.8101	5.24688	7.1748	9.26372	12.043	16.1243	20.5105	27.8478	36.8229
0.536691	0.984375	1.43496	2.02934	2.82298	3.81384	5.26088	7.21846	9.32258	12.0727	16.1768	20.5243	27.8819	36.9073
0.539554	0.984375	1.43496	2.02934	2.82352	3.8204	5.26088	7.22925	9.32763	12.0934	16.1872	20.5712	27.889	36.9141
0.541113	0.984375	1.43541	2.04366	2.83738	3.82123	5.26161	7.23783	9.35156	12.2072	16.3333	20.5793	27.8967	36.9346
0.542006	0.984375	1.4364	2.05685	2.84304	3.83928	5.26305	7.25988	9.3548	12.2183	16.4165	20.6605	27.9581	36.9796
0.543886	0.984375	1.43891	2.0604	2.85	3.84024	5.28386	7.30436	9.36451	12.2603	16.4836	20.6777	27.965	37.0165
0.544316	0.984375	1.44279	2.06724	2.86012	3.84411	5.31243	7.30892	9.38066	12.2973	16.5176	20.686	27.9658	37.0247
0.546204	0.984375	1.44427	2.07439	2.87159	3.85198	5.31243	7.31689	9.38112	12.3071	16.5303	20.6953	27.9708	37.2682
0.546413	0.984375	1.44715	2.07958	2.88045	3.88794	5.31523	7.3463	9.39796	12.3145	16.5315	20.6972	27.9852	37.3066
0.548432	0.984375	1.45647	2.08662	2.88045	3.89108	5.32382	7.3746	9.40287	12.3145	16.5785	20.7245	28.0109	37.3741
0.548875	0.984375	1.4681	2.08817	2.88045	3.89108	5.32382	7.3746	9.41737	12.3419	16.5976	20.8933	28.0158	37.4556
0.550282	0.984908	1.47003	2.08817	2.88681	3.89379	5.32382	7.38183	9.46742	12.3452	16.6054	20.9169	28.0914	37.5565
0.550282	0.98776	1.47595	2.08905	2.92535	3.90502	5.32382	7.40329	9.4788	12.4004	16.6854	20.9464	28.1218	37.588
0.550282	0.988525	1.47656	2.09421	2.93131	3.9375	5.32405	7.41374	9.49616	12.4665	16.709	20.97	28.1729	37.6234
0.550282	0.998367	1.47656	2.0981	2.94813	3.94811	5.32771	7.41963	9.49616	12.4744	16.7362	20.9708	28.1753	37.6596
0.550282	0.999608	1.47656	2.10263	2.94965	3.96472	5.33283	7.45049	9.53566	12.5084	16.7362	21.1412	28.1753	37.6957
0.550282	1.00429	1.47656	2.10533	2.95905	3.96814	5.34014	7.46119	9.53956	12.5411	16.7507	21.1433	28.185	37.7682
0.550282	1.00503	1.48539	2.10782	2.96336	3.96814	5.34912	7.46234	9.58975	12.5483	16.7633	21.2155	28.1882	37.7968
0.550282	1.00945	1.48929	2.10875	2.96336	3.96814	5.38508	7.48389	9.59766	12.5532	16.7994	21.2865	28.2112	37.8034
0.550282	1.01098	1.49243	2.11079	2.96336	3.97577	5.39275	7.48465	9.59766	12.5587	16.8017	21.2967	28.2232	37.8141
0.550282	1.01467	1.49279	2.11766	2.96336	3.99979	5.39726	7.48465	9.59766	12.5725	16.8207	21.366	28.2879	37.8482
0.550282	1.01467	1.49538	2.11814	2.96336	4.00612	5.41965	7.48531	9.60081	12.5736	16.8444	21.4065	28.3227	37.8824
0.550282	1.01467	1.49693	2.11952	2.97057	4.03485	5.43072	7.49496	9.61027	12.5767	16.8882	21.4158	28.3425	37.9344
0.550282	1.01467	1.49693	2.12436	2.97181	4.05026	5.43639	7.49678	9.61027	12.5893	16.9519	21.4328	28.4076	37.9783
0.550282	1.01467	1.49693	2.1281	2.97356	4.07269	5.46417	7.49678	9.61598	12.5979	16.9715	21.4681	28.4359	38.0332
0.550282	1.01467	1.49693	2.15188	2.97356	4.07358	5.46417	7.51402	9.63282	12.6278	16.9929	21.4892	28.4363	38.0969
0.550282	1.01467	1.49693	2.15346	2.97456	4.07957	5.46417	7.53304	9.6749	12.6373	17.009	21.6847	28.4832	38.2143
0.550282	1.01467	1.49693	2.15658	2.97947	4.10225	5.4878	7.53304	9.70745	12.6565	17.0579	21.6986	28.6528	38.3725
0.550282	1.01467	1.49693	2.15971	2.98162	4.11586	5.50282	7.56162	9.71057	12.7043	17.0676	21.8028	28.6569	38.3796
0.550282	1.01467	1.49693	2.16429	2.98242	4.12218	5.52678	7.56809	9.71964	12.7447	17.0754	21.804	28.6673	38.4098
0.550282	1.01467	1.49693	2.19059	2.99386	4.12528	5.56847	7.5871	9.74482	12.7447	17.0952	21.883	28.6992	38.4552
0.550282	1.01467	1.49693	2.19151	2.99386	4.12528	5.65273	7.59709	9.74824	12.7613	17.1243	21.9906	28.7214	38.5394
0.550282	1.01467	1.49693	2.19742	3.00328	4.16932	5.66016	7.60107	9.79373	12.7708	17.1469	22.2535	28.7273	38.5575
0.550282	1.01467	1.49693	2.19826	3.01415	4.18359	5.67133	7.61727	9.79651	12.7898	17.1915	22.2621	28.7467	38.5999
0.550282	1.01467	1.49693	2.20113	3.01537	4.18359	5.67283	7.63122	9.7975	12.7992	17.1949	22.2755	28.7724	38.6046
0.550282	1.01467	1.49693	2.20113	3.02116	4.18879	5.68152	7.63606	9.80346	12.831	17.2072	22.2766	28.7994	38.6837
0.550282	1.01553	1.50326	2.20113	3.03067	4.20525	5.68152	7.64477	9.8089	12.8465	17.2266	22.3407	28.8382	38.79
0.550282	1.0214	1.50699	2.21311	3.03571	4.20525	5.70621	7.64751	9.83205	12.8515	17.2283	22.3432	28.8602	38.8552
0.550282	1.02381	1.51505	2.21484	3.03921	4.20525	5.73416	7.66455	9.83452	12.8621	17.2792	22.3581	28.8769	38.9108
0.550282	1.02852	1.52074	2.21484	3.04401	4.20888	5.73984	7.70788	9.8499	12.8771	17.2942	22.3959	28.9858	38.9135
0.550282	1.02873	1.52842	2.21484	3.04401	4.21245	5.74512	7.71636	9.85668	12.8863	17.3387	22.406	29.0495	38.9186
0.550282	1.02947	1.53478	2.2204	3.05091	4.23396	5.76091	7.71687	9.8714	12.8959	17.3753	22.4716	29.1731	38.9198
0.550282	1.03115	1.5348	2.221	3.05975	4.2482	5.76091	7.7275	9.88738	12.9193	17.4149	22.4957	29.214	38.9925
0.550282	1.03323	1.55355	2.22237	3.08355	4.24824	5.79152	7.7275	9.90071	12.9601	17.4171	22.5817	29.2552	39.0584
0.550282	1.03652	1.55643	2.22679	3.08355	4.25086	5.79236	7.77049	9.99692	12.9866	17.4171	22.6089	29.2562	39.132
0.550282	1.03689	1.55643	2.22847	3.08355	4.28063	5.80222	7.82098	10.0046	13.0314	17.4395	22.6095	29.2634	39.156
0.550282	1.03997	1.55643	2.22847	3.08355	4.29771	5.80802	7.82098	10.0362	13.0453	17.4469	22.6289	29.2793	39.1629
0.550282	1.0408	1.55643	2.22847	3.09546	4.29784	5.87025	7.82987	10.0591	13.0584	17.4882	22.6507	29.31	39.1991
0.550282	1.04409	1.55643	2.22847	3.09585	4.31182	5.9165	7.875	10.1168	13.0606	17.5349	22.662	29.3272	39.3356
0.550282	1.04409	1.55643	2.22847	3.11287	4.3166	5.947	7.87884	10.1404	13.0615	17.5656	22.7101	29.3471	39.3475
0.550282	1.04409	1.55643	2.23124	3.11287	4.31729	5.95221	7.87896	10.1467	13.0801	17.5832	22.7261	29.3884	39.4851
0.550282	1.04409	1.55643	2.23274	3.1172	4.34003	5.95265	7.89037	10.1467	13.083	17.6921	22.7414	29.4221	39.7455
0.550282	1.04409	1.56615	2.24454	3.12028	4.34609	5.95586	7.90168	10.1539	13.1194	17.7259	22.8044	29.5118	39.7476
0.550282	1.04409	1.57055	2.25402	3.15063	4.35384	5.9573	7.90879	10.1646	13.2182	17.7495	22.8388	29.5474	39.9317
0.550282	1.04409	1.57559	2.25965	3.15154	4.38157	5.98772	7.92291	10.19	13.2392	17.7614	22.8464	29.5559	39.9809
0.550282	1.047	1.57577	2.26887	3.15624	4.39152	6.00791	7.92477	10.1973	13.2526	17.7675	22.8609	29.6888	40.0257
0.550282	1.05039	1.57577	2.26887	3.15891	4.40226	6.00791	7.92483	10.2291	13.3187	17.8023	22.9138	29.7203	40.0528
0.550282	1.05546	1.57577	2.26887	3.1794	4.40226	6.03312	7.94391	10.2447	13.3209	17.8278	22.9162	29.7611	40.2309
0.550282	1.06145	1.57577	2.28333	3.1853	4.43652	6.05311	7.97055	10.2772	13.3255	17.8719	23.0463	29.8485	40.2429
0.550282	1.06296	1.57577	2.29492	3.197	4.43652	6.0862	7.97055	10.2831	13.3294	17.895	23.138	29.9323	40.2477
0.550282	1.06306	1.57911	2.30202	3.19922	4.44935	6.08629	7.97292	10.3037	13.3459	17.899	23.2299	29.933	40.3517
0.550282	1.06434	1.58755	2.31544	3.19922	4.46364	6.08802	7.98421	10.3301	13.3459	17.9446	23.2443	29.9356	40.4348
0.550282	1.06606	1.59395	2.32164	3.19922	4.48756	6.08802	7.98573	10.3389	13.3708	17.9446	23.289	30.0456	40.7729
0.550282	1.06846	1.59563	2.32164	3.19922	4.49079	6.10732	8.0095	10.3623	13.4341	17.9648	23.4	30.0486	40.8256
0.550282	1.07254	1.61254	2.32164	3.19922	4.49079	6.10797	8.01291	10.3761	13.4509	17.9746	23.4207	30.0594	40.8545
0.550282	1.07263	1.61314	2.33034	3.19922	4.50794	6.13561	8.01355	10.4156	13.4622	17.9783	23.4255	30.1251	40.94
0.550282	1.07287	1.61561	2.33368	3.19922	4.51768	6.14774	8.02521	10.4409	13.4814	18.0346	23.4407	30.1573	41.0037
0.550282	1.08311	1.62153	2.33465	3.20394	4.52438	6.15234	8.04617	10.464	13.515	18.0472	23.5058	30.1573	41.1507
0.550282	1.08891	1.62226	2.33465	3.20526	4.52438	6.15234	8.04617	10.4784	13.515	18.0642	23.5085	30.1894	41.1926
0.550282	1.08967	1.62483	2.33972	3.20867	4.52763	6.15726	8.05284	10.5078	13.5343	18.0853	23.5531	30.2205	41.2388
0.550282	1.09276	1.63057	2.34311	3.20867	4.53318	6.17137	8.07248	10.5131	13.5441	18.0992	23.6006	30.2395	41.2418
0.550282	1.09712	1.65085	2.34861	3.21415	4.53774	6.19648	8.12647	10.5131	13.5553	18.1252	23.7303	30.2691	41.3203
0.550282	1.10056	1.65085	2.34957	3.21422	4.53774	6.22876	8.14541	10.5131	13.5887	18.1326	23.88	30.2695	41.3496
0.550282	1.10056	1.65085	2.37713	3.23686	4.57761	6.26092	8.14715	10.5189	13.6443	18.146	23.8914	30.2785	41.3628
0.550282	1.10056	1.65085	2.38406	3.23686	4.59264	6.26294	8.15087	10.5808	13.6865	18.166	23.9521	30.3068	41.4878
0.550282	1.10056	1.65085	2.39191	3.23686	4.59741	6.2688	8.16054	10.6064	13.7108	18.1677	23.9637	30.4096	41.5308
0.550282	1.10056	1.65085	2.39324	3.25607	4.59741	6.27418	8.17755	10.6174	13.7152	18.2109	23.9711	30.4394	41.5425
0.550282	1.10056	1.65085	2.40409	3.27688	4.61249	6.27418	8.18054	10.6714	13.7228	18.2126	23.9736	30.6686	41.5451
0.550282	1.10056	1.65085	2.40945	3.27764	4.62368	6.28865	8.18956	10.6783	13.7734	18.2135	24.0861	30.7131	41.6037
0.550282	1.10056	1.65085	2.41404	3.2833	4.65163	6.29446	8.32061	10.6846	13.7802	18.2475	24.1184	30.728	41.7127
0.550282	1.10056	1.65085	2.41495	3.2833	4.70161	6.30308	8.32728	10.6846	13.801	18.2525	24.1222	30.7657	41.7394
0.550282	1.10056	1.65085	2.41553	3.2833	4.7093	6.30308	8.35632	10.704	13.8558	18.2707	24.1224	30.7696	41.741
0.550282	1.10056	1.65085	2.42091	3.28915	4.71461	6.32705	8.35654	10.7278	13.9212	18.2847	24.1285	30.8207	41.8454
0.550282	1.10056	1.65085	2.42374	3.28957	4.73059	6.38217	8.36719	10.7439	13.932	18.2922	24.1285	30.8512	42.0144
0.550282	1.10056	1.65085	2.42374	3.29063	4.73371	6.38897	8.37081	10.763	13.9947	18.317	24.1298	30.8649	42.1878
0.550282	1.10056	1.65085	2.42374	3.29081	4.74975	6.40309	8.38345	10.7861	14.0295	18.317	24.317	30.8678	42.2116
0.550282	1.10056	1.65085	2.42374	3.31067	4.76323	6.40317	8.39057	10.788	14.0723	18.3253	24.4209	30.9188	42.4909
0.550282	1.10056	1.66105	2.42817	3.31085	4.77048	6.40956	8.3997	10.7937	14.0877	18.3402	24.5259	30.9271	42.5436
0.550282	1.10056	1.66269	2.43162	3.31085	4.77092	6.41734	8.42445	10.8348	14.0959	18.3691	24.5724	30.9384	42.5616
0.550282	1.10056	1.66342	2.4362	3.32294	4.77828	6.41734	8.42489	10.8393	14.1477	18.4061	24.6291	31.0683	42.7361
0.550282	1.10056	1.67489	2.43805	3.36379	4.78702	6.44089	8.42684	10.8431	14.1672	18.4859	24.6413	31.1614	42.9545
0.550282	1.10056	1.68895	2.45018	3.37916	4.78765	6.46257	8.45687	10.8644	14.1819	18.498	24.6549	31.1961	43.7842
0.550282	1.10056	1.69716	2.46094	3.40714	4.7902	6.46309	8.46204	10.8708	14.1838	18.516	24.7212	31.2002	44.2291
0.550282	1.10056	1.69923	2.46094	3.41884	4.8052	6.47288	8.47006	10.8906	14.199	18.5281	24.7321	31.3216	44.3857
0.550282	1.10056	1.69956	2.46555	3.42769	4.80825	6.47372	8.48533	10.8941	14.2481	18.534	24.7627	31.3622	44.5911
0.550282	1.10056	1.7126	2.47078	3.44531	4.82882	6.49706	8.50004	10.9188	14.2671	18.5437	24.8536	31.4201	45.1319
0.550282	1.10056	1.7127	2.47321	3.45409	4.83498	6.49706	8.50105	10.9241	14.2728	18.6208	24.8603	31.4711	45.2177
0.550282	1.10056	1.72266	2.47321	3.46591	4.85373	6.50047	8.52069	10.9266	14.3036	18.6239	24.9078	31.5006	46.634
0.550282	1.10056	1.72266	2.48332	3.48029	4.87042	6.52117	8.52392	10.9643	14.32	18.6476	24.954	31.5087	47.1178
0.550282	1.10056	1.72266	2.48584	3.48029	4.87112	6.5403	8.52952	11.0056	14.3429	18.6645	25.0012	31.596	48.0513
0.550282	1.10772	1.73655	2.48783	3.48029	4.87241	6.54287	8.54268	11.0194	14.3496	18.6934	25.043	31.6353	49.5254
0.550282	1.11594	1.73857	2.49003	3.48029	4.87881	6.55275	8.58023	11.0245	14.3496	18.7031	25.0511	31.7117	51.6225
0.550282	1.11778	1.73904	2.50967	3.4806	4.88482	6.55275	8.59373	11.0307	14.3496	18.8064	25.1125	31.7963	54.5576
0.550282	1.12319	1.74015	2.52333	3.48604	4.8875	6.5666	8.59907	11.0325	14.3794	18.8316	25.1221	31.8137	54.692
0.550282	1.12363	1.74015	2.52671	3.49765	4.9031	6.57442	8.60976	11.0742	14.4023	18.8964	25.1365	31.8738	54.7363
0.551083	1.12552	1.74015	2.52873	3.50125	4.92188	6.58176	8.61328	11.0779	14.4526	18.9064	25.1787	32.0045	54.9437
0.551526	1.12981	1.74015	2.53369	3.50265	4.92802	6.60339	8.6168	11.0852	14.5117	18.9099	25.2332	32.2392	55.4181
0.552456	1.13234	1.74015	2.53369	3.51127	4.9394	6.60339	8.61682	11.1094	14.5216	18.9295	25.2698	32.3583	55.5396
0.552591	1.13434	1.74015	2.53369	3.52353	4.94642	6.60577	8.62638	11.1164	14.5592	18.9303	25.3153	32.3991	55.5492
0.554214	1.13474	1.74015	2.54177	3.52353	4.95254	6.61531	8.64253	11.1206	14.5776	18.934	25.3601	32.4565	55.6249
0.554813	1.1361	1.74015	2.54691	3.52353	4.96823	6.62058	8.65537	11.1375	14.5934	18.9508	25.4409	32.4768	55.7227
0.556545	1.13937	1.74015	2.54962	3.52353	4.97694	6.62628	8.66225	11.1429	14.6338	18.9636	25.5248	32.4972	56.0093
0.557496	1.13973	1.74015	2.55868	3.52353	4.98302	6.62628	8.66935	11.1442	14.6521	18.9872	25.5445	32.5477	56.2231
0.560924	1.1479	1.74272	2.56918	3.52353	4.98302	6.62628	8.67188	11.1513	14.7346	19.1035	25.587	32.6306	56.3118
0.561643	1.1481	1.74971	2.56929	3.52353	4.98302	6.62628	8.67548	11.1614	14.7738	19.1738	25.5883	32.6369	56.6885
0.562706	1.14995	1.75028	2.56929	3.52353	5.01935	6.63125	8.68585	11.1746	14.8575	19.2026	25.5967	32.7018	56.9296
0.56355	1.15769	1.76583	2.56929	3.52353	5.01935	6.64734	8.74183	11.2074	14.8738	19.2768	25.6189	32.7896	56.9471
0.563742	1.15963	1.76635	2.58827	3.55478	5.01935	6.6481	8.76315	11.2412	14.9041	19.3164	25.6306	32.8229	56.961
0.564377	1.16206	1.76919	2.59843	3.55608	5.04103	6.64909	8.77386	11.2721	14.9201	19.347	25.6517	32.8634	57.0441
0.564461	1.16281	1.77461	2.59853	3.55752	5.04942	6.65042	8.78067	11.2908	15.0117	19.3724	25.6772	33.0408	57.4637
0.565299	1.16574	1.77461	2.61079	3.55784	5.06007	6.65445	8.79422	11.3123	15.0117	19.4414	25.6941	33.0948	57.5006
0.566464	1.16705	1.77461	2.61594	3.58318	5.06619	6.65949	8.80031	11.3123	15.0137	19.4554	25.7172	33.1271	57.5948
0.568299	1.17046	1.77886	2.61601	3.63095	5.06738	6.71136	8.84202	11.323	15.0299	19.4554	25.7426	33.1523	58.7667
0.570768	1.18003	1.77981	2.61601	3.63353	5.07076	6.71705	8.85022	11.3436	15.044	19.4663	25.757	33.1939	59.0744
0.571906	1.18613	1.79159	2.61601	3.63353	5.07335	6.7575	8.86279	11.3444	15.1623	19.471	25.8331	33.2236	60.7896
0.572761	1.18931	1.79159	2.61601	3.63355	5.07335	6.77093	8.87792	11.363	15.1758	19.4879	25.8972	33.2236	62.8622
0.57535	1.19025	1.79159	2.62051	3.65845	5.09447	6.78454	8.88517	11.3763	15.2121	19.5138	25.9033	33.2236	65.011
0.575431	1.19448	1.79159	2.62447	3.65933	5.09619	6.80694	8.89144	11.4151	15.2201	19.5176	25.9334	33.2762	66.9585
0.576212	1.19804	1.79283	2.65051	3.67082	5.11184	6.8194	8.89294	11.4506	15.2521	19.5432	26.0488	33.3098	68.5169
0.576549	1.20688	1.79857	2.65051	3.69141	5.12088	6.82439	8.92443	11.463	15.2598	19.5605	26.1073	33.4126	69.8066
0.576982	1.20781	1.81016	2.65051	3.69141	5.1226	6.83769	8.95795	11.4718	15.2857	19.689	26.1173	33.4676	70.6235
0.577541	1.2099	1.81274	2.65051	3.69141	5.13859	6.8483	8.97891	11.4729	15.2895	19.7013	26.1482	33.4976	71.0469
0.579687	1.21015	1.82526	2.65051	3.69272	5.17382	6.86421	8.98682	11.4815	15.3469	19.7167	26.1827	33.5456
0.580333	1.21023	1.83099	2.65831	3.72407	5.19135	6.86421	9.00117	11.4902	15.464	19.7607	26.3044	33.6092
0.583697	1.2114	1.84331	2.66209	3.72407	5.19929	6.8893	9.04203	11.4902	15.5059	19.8117	26.3182	33.983
0.584193	1.21304	1.85019	2.66488	3.74839	5.20461	6.89062	9.0708	11.5003	15.5371	19.815	26.3691	34.0375
0.585099	1.21364	1.85668	2.66771	3.75646	5.20684	6.89492	9.08364	11.506	15.6284	19.8658	26.4147	34.1076
0.585203	1.21794	1.85715	2.67222	3.75646	5.22044	6.90818	9.09531	11.5349	15.6305	19.9102	26.4251	34.2174
0.585842	1.22041	1.86487	2.68545	3.75646	5.23202	6.91483	9.09926	11.569	15.642	19.9457	26.4525	34.2212
0.587479	1.22209	1.86965	2.68856	3.76046	5.25	6.92101	9.10547	11.569	15.6439	19.9473	26.4651	34.2624
0.587678	1.23002	1.87419	2.70703	3.76451	5.25425	6.93006	9.10547	11.569	15.6506	19.9694	26.4651	34.3986
0.588423	1.23047	1.87419	2.71819	3.7715	5.29367	6.95899	9.1091	11.5768	15.6508	19.9992	26.4708	34.4689
0.591064	1.23047	1.87419	2.71819	3.78908	5.30102	6.96493	9.11876	11.5769	15.6862	20.013	26.5017	34.5096
0.591777	1.23047	1.87419	2.72122	3.79955	5.31243	6.97105	9.11911	11.5847	15.6961	20.0428	26.5038	34.6853
0.591835	1.23047	1.87419	2.72612	3.80504	5.32382	6.9811	9.13203	11.6082	15.7102	20.0507	26.5382	34.8672
0.59649	1.23047	1.87522	2.73648	3.81083	5.37297	6.99314	9.13203	11.6082	15.7231	20.0658	26.552	34.8941
0.597443	1.23047	1.88485	2.74482	3.81662	5.37317	6.9953	9.13203	11.6353	15.7299	20.0783	26.5929	34.9924
0.598509	1.23047	1.88487	2.75141	3.8204	5.37477	6.9953	9.13535	11.6511	15.7358	20.1271	26.6339	35.0007
0.598996	1.23047	1.89003	2.75141	3.8204	5.37488	6.99684	9.16034	11.656	15.7442	20.1275	26.6359	35.0198
0.599241	1.23047	1.90505	2.75141	3.8204	5.38235	7.00938	9.17842	11.6584	15.7519	20.1311	26.7144	35.1432
0.600523	1.23047	1.9078	2.75141	3.82057	5.38688	7.03086	9.19832	11.6914	15.7577	20.1661	26.7554	35.1923
0.604138	1.23047	1.9097	2.75141	3.83346	5.39494	7.04705	9.21418	11.6977	15.7673	20.1812	26.7649	35.2335
0.605566	1.23047	1.91437	2.75141	3.836	5.39839	7.05418	9.22237	11.7036	15.798	20.2037	26.7782	35.3515
0.605961	1.23047	1.91636	2.75141	3.83883	5.40752	7.10722	9.22441	11.7175	15.798	20.2398	26.81	35.3588
0.607137	1.23047	1.91778	2.75141	3.84411	5.43453	7.14096	9.23339	11.7316	15.8305	20.3092	26.8495	35.3982
0.609814	1.23047	1.91863	2.75141	3.84411	5.43924	7.15367	9.25433	11.7323	15.833	20.3247	26.8513	35.4176
0.612262	1.23047	1.92205	2.75254	3.86802	5.44752	7.16148	9.26372	11.7766	15.8859	20.3553	26.8547	35.4187
0.613117	1.23047	1.92205	2.75812	3.88373	5.44752	7.17411	9.26739	11.792	15.905	20.3798	26.8862	35.499
0.614608	1.23047	1.92205	2.78423	3.90756	5.45477	7.1748	9.2731	11.8125	15.9126	20.4184	26.9118	35.5714
0.615284	1.23103	1.92205	2.78423	3.92263	5.46417	7.22862	9.28343	11.8497	15.9216	20.475	26.9475	35.5816
0.615697	1.23108	1.92205	2.78423	3.9249	5.46417	7.23783	9.29698	11.8528	15.9411	20.4791	26.9592	35.5816
0.615959	1.24453	1.93646	2.78423	3.9375	5.48443	7.24481	9.32761	11.8534	15.9493	20.5022	26.9863	35.6437
0.61631	1.25024	1.94764	2.79424	3.94518	5.49174	7.25751	9.33445	11.8534	15.951	20.508	27.0177	35.6454
0.616683	1.25055	1.95468	2.79675	3.94518	5.4976	7.27962	9.34791	11.8887	15.9677	20.5506	27.0254	35.659
0.619003	1.25171	1.95504	2.80225	3.94518	5.50282	7.31316	9.34937	11.9044	16.0245	20.5768	27.0325	35.6997
0.619474	1.25231	1.95963	2.8059	3.9455	5.50282	7.31689	9.35176	11.9044	16.0475	20.6044	27.0688	35.7819
0.620004	1.25484	1.96181	2.8059	3.94718	5.50947	7.31868	9.3548	11.907	16.0944	20.6558	27.1842	36.1096
0.622121	1.25484	1.96875	2.8059	3.96754	5.51467	7.33435	9.37097	11.9374	16.1812	20.6851	27.1842	36.1364
0.622328	1.25484	1.96875	2.8059	3.96814	5.52141	7.34168	9.37848	11.9754	16.1843	20.7117	27.2265	36.1414
0.623147	1.25484	1.96879	2.8059	3.96814	5.53027	7.35913	9.38568	12.1187	16.1843	20.7143	27.2324	36.1783
0.627533	1.25484	1.97881	2.8059	3.96814	5.53027	7.36487	9.40323	12.1309	16.1936	20.7479	27.302	36.2505
0.628693	1.25484	1.98177	2.8059	3.96814	5.53027	7.3746	9.41932	12.1429	16.2235	20.7902	27.302	36.3667
0.634221	1.25484	1.98407	2.81858	3.97664	5.53144	7.37767	9.47061	12.2183	16.2496	20.8371	27.3756	36.3794
0.635406	1.25484	1.98407	2.83133	3.98358	5.53151	7.38281	9.47142	12.2183	16.2496	20.9411	27.4061	36.4169
0.636482	1.25484	1.98407	2.83493	3.98706	5.53981	7.39212	9.47755	12.2183	16.2623	20.97	27.4061	36.4219
0.639381	1.25484	1.98407	2.84446	3.9887	5.59533	7.3992	9.49935	12.2196	16.2887	21.0104	27.4061	36.4332
0.641223	1.25484	1.98407	2.85349	4.00302	5.59793	7.41068	9.55655	12.286	16.3184	21.0396	27.4061	36.4515
0.643525	1.25484	1.98407	2.86884	4.00612	5.59794	7.43167	9.59448	12.2885	16.3611	21.0803	27.4125	36.4546
0.646384	1.2555	1.98407	2.86992	4.00612	5.60106	7.44001	9.59766	12.3071	16.3611	21.0855	27.4182	36.4699
0.649255	1.25675	1.98407	2.86992	4.00612	5.60842	7.44508	9.61027	12.3268	16.3722	21.1217	27.4359	36.47
0.650445	1.26423	1.98407	2.86992	4.00612	5.6118	7.45504	9.62337	12.344	16.3875	21.1594	27.5304	36.6334
0.653381	1.26607	1.98407	2.86992	4.00612	5.6118	7.4725	9.648	12.3764	16.3925	21.1655	27.5361	36.6466
0.656478	1.26988	1.98407	2.86992	4.00624	5.61268	7.48465	9.648	12.3847	16.4165	21.2341	27.5669	36.7219
0.657306	1.27019	1.98407	2.86992	4.02218	5.6144	7.48863	9.66995	12.393	16.4294	21.3904	27.6261	36.7529
0.661364	1.27532	1.98508	2.86992	4.02296	5.61719	7.49666	9.67621	12.4014	16.4305	21.4045	27.705	36.812
0.661461	1.27905	1.98945	2.87833	4.03624	5.62258	7.49678	9.68034	12.4149	16.4941	21.418	27.7262	36.8586
0.667573	1.28036	2.00115	2.88045	4.05868	5.64363	7.51336	9.69809	12.4149	16.5048	21.6229	27.7575	36.9518
0.671671	1.28792	2.01189	2.88045	4.05924	5.65367	7.51423	9.74069	12.4247	16.5176	21.7135	27.8594	36.9711
0.672336	1.2915	2.01537	2.88601	4.08199	5.66016	7.51629	9.75239	12.4442	16.6053	21.7247	27.9092	37.0483
0.672622	1.29308	2.02934	2.89187	4.09582	5.6655	7.51895	9.75878	12.4515	16.6054	21.7719	27.9213	37.0672
0.672747	1.2934	2.02934	2.90266	4.12189	5.6655	7.53514	9.76034	12.4941	16.6235	21.8248	27.9476	37.0817
0.672792	1.29826	2.02934	2.91121	4.12528	5.68152	7.55878	9.76964	12.5701	16.6709	21.8256	27.9829	37.0927
0.673433	1.29838	2.02942	2.91305	4.12528	5.68152	7.58607	9.77283	12.611	16.7231	21.9148	28.006	37.1308
0.675452	1.29986	2.04178	2.92844	4.12683	5.68822	7.64477	9.80583	12.6291	16.7289	21.9369	28.0558	37.1308
0.680154	1.31036	2.04357	2.93532	4.18359	5.70496	7.6504	9.82801	12.6373	16.7344	21.9906	28.0644	37.2415
0.682685	1.31145	2.05019	2.95133	4.19083	5.7081	7.67765	9.83452	12.6495	16.7344	22.014	28.1753	37.2487
0.684573	1.31355	2.05407	2.95312	4.19083	5.73984	7.69215	9.84334	12.6621	16.7344	22.0182	28.1793	37.2544
0.685199	1.31969	2.05594	2.95312	4.20525	5.74512	7.70788	9.84683	12.6685	16.7608	22.0195	28.2073	37.3625
0.686197	1.32526	2.06054	2.95893	4.21245	5.75848	7.70788	9.8512	12.7138	16.839	22.0916	28.2258	37.3799
0.686764	1.32526	2.06088	2.96336	4.21336	5.79236	7.72358	9.85605	12.715	16.8559	22.1019	28.2754	37.434
0.686958	1.32526	2.06131	2.96336	4.23091	5.79965	7.72358	9.87184	12.721	16.8964	22.1184	28.2847	37.4545
0.692372	1.32526	2.06363	2.96955	4.23292	5.80034	7.7275	9.87589	12.7586	16.899	22.1539	28.3339	37.4839
0.694137	1.32526	2.07994	2.97356	4.23396	5.80802	7.74287	9.90814	12.8147	16.9181	22.2144	28.3532	37.5681
0.694642	1.32526	2.08368	2.97356	4.25122	5.81321	7.79321	9.91009	12.8465	16.9305	22.2153	28.3934	37.5871
0.695442	1.32526	2.08573	2.97356	4.25993	5.81805	7.8002	9.91384	12.8475	16.9676	22.2575	28.481	37.6033
0.696058	1.32526	2.08817	2.97522	4.29387	5.83403	7.81711	9.92036	12.8818	16.9715	22.307	28.49	37.7616
0.696058	1.32538	2.08817	2.99032	4.29784	5.84958	7.82231	9.92463	12.8935	16.9876	22.3512	28.5055	37.7816
0.696058	1.32647	2.08817	2.99386	4.29784	5.85226	7.8258	9.93126	12.9332	17.0001	22.3742	28.5065	37.99
0.696058	1.32656	2.10263	2.99386	4.2982	5.86082	7.83259	9.94159	12.9474	17.031	22.4124	28.5468	38.0377
0.696058	1.32915	2.10263	2.99386	4.30488	5.86848	7.85828	9.9498	12.963	17.0793	22.425	28.5734	38.0756
0.696058	1.32997	2.10263	2.99386	4.30488	5.87025	7.86346	9.96514	12.9835	17.1042	22.458	28.6328	38.2682
0.696058	1.33437	2.10263	2.99929	4.311	5.88454	7.87884	9.96818	12.9871	17.1044	22.5448	28.6805	38.3106
0.696058	1.33586	2.105	3.00355	4.31206	5.89939	7.87884	9.97927	12.9959	17.1243	22.5817	28.734	38.3445
0.696058	1.34032	2.11623	3.00396	4.31354	5.92672	7.87884	9.99335	13.0178	17.1362	22.6406	28.7351	38.493
0.696058	1.34342	2.11698	3.00396	4.33569	5.92672	7.87892	9.99335	13.0526	17.1647	22.6887	28.7751	38.5182
0.696058	1.34654	2.11698	3.00396	4.34322	5.92672	7.88628	9.99335	13.0534	17.1968	22.795	28.794	38.5991
0.696058	1.35101	2.11698	3.02265	4.36079	5.9387	7.90342	9.99335	13.0911	17.2002	22.8006	28.9273	38.6937
0.696058	1.35308	2.11698	3.02644	4.36079	5.94412	7.91027	9.99405	13.1002	17.2027	22.8334	28.9618	39.0328
0.696058	1.36386	2.11698	3.03111	4.36581	5.95545	7.93628	10.0165	13.1194	17.2266	22.8655	28.9618	39.132
0.696058	1.36388	2.11698	3.03902	4.3858	5.9573	7.94047	10.0387	13.1546	17.2353	22.892	28.9984	39.2202
0.696058	1.36854	2.12019	3.04401	4.39302	5.98772	7.94391	10.0417	13.1582	17.2494	22.8931	29.0109	39.2548
0.696058	1.37179	2.12678	3.04589	4.40226	5.99277	7.96294	10.0482	13.1746	17.2611	22.8986	29.0159	39.3019
0.696058	1.37382	2.12765	3.05216	4.40226	5.99277	8.01223	10.0886	13.1931	17.2915	22.9343	29.0703	39.3358
0.696058	1.37445	2.13334	3.06098	4.40788	5.99329	8.01223	10.1168	13.2147	17.2915	23.0322	29.0959	39.3725
0.696058	1.37845	2.13363	3.08106	4.41348	5.99683	8.03062	10.1283	13.2182	17.3107	23.0488	29.1056	39.4057
0.696058	1.38027	2.13542	3.08355	4.43652	6.00791	8.03488	10.1377	13.2526	17.4015	23.0641	29.1623	39.504
0.696058	1.38084	2.14765	3.08355	4.43652	6.05311	8.04973	10.1377	13.2731	17.4129	23.0671	29.2116	39.5477
0.696058	1.38135	2.15305	3.08355	4.43652	6.06181	8.06018	10.1377	13.3255	17.4183	23.1956	29.2945	39.5913
0.696058	1.38138	2.15811	3.08355	4.44634	6.06906	8.06121	10.1404	13.3935	17.4432	23.223	29.3667	39.5913
0.696058	1.38431	2.17468	3.08355	4.44733	6.08802	8.06504	10.1467	13.4191	17.4571	23.2659	29.3969	39.6814
0.700453	1.38455	2.17688	3.08355	4.46491	6.09827	8.07248	10.1467	13.4273	17.4882	23.2764	29.4113	39.689
0.70189	1.3863	2.19261	3.08843	4.47786	6.11284	8.07356	10.1675	13.4491	17.5146	23.2907	29.4254	39.7196
0.702389	1.38662	2.20113	3.09183	4.48451	6.11583	8.07446	10.1735	13.4564	17.5349	23.2972	29.4861	39.7577
0.703038	1.38674	2.20113	3.13226	4.48527	6.11631	8.09474	10.1735	13.4814	17.5611	23.3083	29.4861	39.9279
0.703223	1.38767	2.20113	3.13226	4.48794	6.13177	8.09495	10.1821	13.515	17.5679	23.3275	29.5025	39.9317
0.703975	1.39212	2.20141	3.13507	4.49079	6.13977	8.09495	10.1973	13.5352	17.6177	23.353	29.5034	39.9681
0.704937	1.39212	2.20816	3.14016	4.49079	6.14332	8.11719	10.1973	13.5374	17.6891	23.3948	29.5118	39.9734
0.705739	1.39212	2.21483	3.14723	4.49079	6.1474	8.11736	10.2169	13.5374	17.7205	23.5703	29.5198	39.9979
0.70846	1.39212	2.21946	3.14727	4.49587	6.14862	8.11736	10.2389	13.5374	17.7427	23.6298	29.5477	40.0528
0.71248	1.39212	2.22847	3.14913	4.49648	6.15726	8.12109	10.2831	13.5731	17.7512	23.7114	29.5593	40.0988
0.713392	1.39212	2.22847	3.15154	4.51768	6.16006	8.12482	10.3037	13.651	17.7614	23.7618	29.6166	40.1789
0.713622	1.39212	2.22847	3.15154	4.52438	6.16709	8.13146	10.3332	13.6523	17.7621	23.8124	29.6181	40.1967
0.717392	1.39212	2.243	3.15154	4.52438	6.172	8.13599	10.3359	13.6555	17.7634	23.8749	29.7356	40.2248
0.717938	1.39212	2.25908	3.15742	4.53774	6.172	8.13903	10.3389	13.6697	17.7798	23.878	29.7356	40.2647
0.71991	1.39734	2.26137	3.16188	4.53774	6.172	8.14905	10.3476	13.6975	17.7878	23.9167	29.7814	40.2888
0.720566	1.40016	2.26182	3.17435	4.54034	6.172	8.15087	10.3476	13.7284	17.8179	23.9204	29.8122	40.3311
0.722072	1.40268	2.26602	3.17684	4.55778	6.18129	8.15087	10.3517	13.739	17.8436	23.9244	29.8139	40.7335
0.723402	1.40397	2.26887	3.19145	4.56484	6.18797	8.15458	10.3713	13.7681	17.8525	23.947	29.8509	41.1735
0.72638	1.40627	2.26887	3.19922	4.5672	6.19648	8.17911	10.3849	13.79	17.8528	23.9606	29.9367	41.2748
0.727416	1.41215	2.26887	3.19922	4.56763	6.21113	8.18054	10.3856	13.8032	18.0724	24.033	29.9598	42.1388
0.729776	1.42438	2.26887	3.19922	4.5743	6.22573	8.18054	10.3856	13.8361	18.0724	24.0493	29.9841	42.1655
0.730272	1.42761	2.26887	3.20235	4.57607	6.24927	8.18391	10.4089	13.8562	18.0975	24.1373	30.095	42.2572
0.732172	1.42838	2.26887	3.20867	4.57761	6.26452	8.19438	10.4089	13.8635	18.205	24.152	30.1693	42.4382
0.73276	1.43078	2.26887	3.20867	4.57761	6.27418	8.23522	10.4653	13.985	18.2123	24.1855	30.2205	42.8497
0.732973	1.4329	2.26887	3.20867	4.58249	6.27418	8.23943	10.4711	13.9857	18.2651	24.1993	30.3093	43.505
0.733455	1.43496	2.26887	3.21373	4.58601	6.27418	8.25057	10.4979	14.0446	18.2707	24.2124	30.3897	43.7606
0.733644	1.43496	2.26887	3.22504	4.59741	6.27706	8.25424	10.5131	14.0446	18.2802	24.2322	30.3923	44.7979
0.734006	1.43496	2.26887	3.22598	4.59741	6.30308	8.29172	10.5333	14.1048	18.3253	24.297	30.5255	46.4909
0.734948	1.43496	2.26887	3.22791	4.59761	6.31444	8.32739	10.5456	14.1299	18.3922	24.3221	30.5365	47.9447
0.735717	1.43496	2.27568	3.23359	4.61207	6.31937	8.33361	10.5706	14.1629	18.457	24.3645	30.5513	50.1769
0.736835	1.43496	2.27859	3.25124	4.6196	6.32705	8.33635	10.5989	14.167	18.4587	24.3987	30.5591	50.2947
0.73715	1.43496	2.28695	3.26819	4.62368	6.32705	8.36003	10.6061	14.1819	18.4587	24.4488	30.8624	50.3328
0.738281	1.43496	2.28879	3.27576	4.6256	6.3342	8.37081	10.6163	14.1969	18.4636	24.5309	30.8967	50.3403
0.738281	1.43496	2.28972	3.27813	4.64329	6.35258	8.37246	10.6207	14.199	18.4717	24.5515	30.9765	50.4042
0.738281	1.43549	2.29104	3.30075	4.64329	6.35289	8.37871	10.6289	14.2011	18.474	24.5909	31.0166	50.7707
0.738281	1.45099	2.30308	3.30169	4.64955	6.37186	8.38165	10.6533	14.2054	18.4922	24.5914	31.0673	51.0622
0.738281	1.45167	2.30549	3.30169	4.68225	6.39416	8.38165	10.6533	14.2223	18.5029	24.6696	31.1001	51.1457
0.738281	1.45222	2.32164	3.30317	4.68255	6.39844	8.38427	10.6846	14.2925	18.5187	24.6794	31.2229	51.2687
0.738281	1.45427	2.32164	3.31085	4.69851	6.39844	8.40627	10.6846	14.3662	18.5333	24.6826	31.3013	51.4713
0.738281	1.46084	2.32164	3.31461	4.70161	6.40317	8.40675	10.6959	14.3753	18.5634	24.7407	31.3734	51.888
0.738281	1.46191	2.32164	3.31669	4.70161	6.40527	8.41033	10.7022	14.437	18.5962	24.7627	31.4229	52.1082
0.738281	1.46238	2.33244	3.31969	4.70161	6.41734	8.4177	10.7298	14.438	18.6545	24.7872	31.4856	52.5051
0.738281	1.46774	2.33351	3.32439	4.72731	6.42245	8.42201	10.7439	14.438	18.659	24.875	31.5687	53.0384
0.738281	1.47205	2.33421	3.34518	4.73371	6.43052	8.42489	10.7495	14.4443	18.6996	24.875	31.596	53.2787
0.738281	1.47281	2.33465	3.34724	4.73393	6.44089	8.44473	10.7636	14.4443	18.7096	24.9078	31.8185	53.5285
0.738281	1.47293	2.33465	3.34724	4.73441	6.44089	8.44557	10.7796	14.4443	18.8244	24.9554	31.8233	53.885
0.738281	1.47362	2.33465	3.35485	4.73986	6.44406	8.44651	10.7894	14.4585	18.8516	24.9778	31.8413	53.9222
0.738281	1.47381	2.33465	3.36183	4.74044	6.45706	8.45718	10.8309	14.5195	18.9017	24.9915	31.9448	54.13
0.738281	1.47415	2.33587	3.36389	4.74239	6.46396	8.45753	10.8393	14.5612	18.93	25.0049	31.9975	54.1341
0.738281	1.47656	2.33782	3.36835	4.74559	6.47372	8.46237	10.8644	14.5652	18.9508	25.0303	32.0537	54.7994
0.738281	1.47656	2.34065	3.36891	4.75286	6.47372	8.48577	10.8728	14.5716	18.9748	25.0303	32.1263	54.9308
0.738281	1.47656	2.34596	3.37177	4.75286	6.47939	8.50176	10.8728	14.6379	19.0151	25.0546	32.1518	55.2303
0.738281	1.47656	2.35901	3.37756	4.75546	6.49706	8.52849	10.8781	14.6445	19.0724	25.0967	32.2012	55.4785
0.738281	1.47656	2.36593	3.39794	4.76028	6.50172	8.53456	10.8978	14.6545	19.1318	25.0967	32.3143	55.7896
0.738281	1.47656	2.38476	3.4	4.77437	6.51116	8.54667	10.9311	14.6545	19.1397	25.0967	32.3318	57.6299
0.738281	1.47656	2.3953	3.41929	4.77828	6.53887	8.55628	10.9568	14.6772	19.1632	25.0967	32.434	59.7823
0.738281	1.47732	2.39685	3.42379	4.7972	6.54436	8.55928	10.9643	14.6834	19.1969	25.1462	32.4521	61.7968
0.738281	1.47828	2.39762	3.42769	4.79894	6.55087	8.56014	10.9643	14.712	19.2271	25.1665	32.5533	63.6767
0.738281	1.48385	2.40208	3.42769	4.81224	6.55275	8.57543	10.9951	14.7184	19.2599	25.1867	32.597	65.1466
0.738281	1.48503	2.42374	3.42769	4.82075	6.55275	8.57781	11.0056	14.7492	19.2846	25.1955	32.6081	66.1913
0.738281	1.48558	2.43085	3.43061	4.83498	6.59352	8.61328	11.025	14.7513	19.3023	25.1979	32.6118	66.8552
0.738281	1.49178	2.4362	3.43119	4.84388	6.59562	8.66935	11.0424	14.7523	19.3108	25.2039	32.6944	67.3612
0.738281	1.49455	2.4362	3.44096	4.84659	6.59703	8.66935	11.0551	14.7738	19.3439	25.2051	32.7361	67.6299
0.738281	1.49689	2.4362	3.44531	4.85979	6.59779	8.67181	11.0635	14.7794	19.3962	25.2183	32.7756
0.738281	1.49693	2.4362	3.44531	4.86573	6.60488	8.69725	11.0708	14.7923	19.4211	25.2219	32.8588
0.738281	1.49693	2.4362	3.44531	4.88482	6.61255	8.70274	11.071	14.8066	19.471	25.2375	32.8643
0.738281	1.49693	2.43836	3.44531	4.90338	6.62628	8.72471	11.0849	14.8168	19.5555	25.2519	32.9334
0.738281	1.49693	2.44784	3.4523	4.90338	6.62628	8.72853	11.0852	14.8168	19.6191	25.2807	32.9612
0.738281	1.49693	2.44898	3.45791	4.91048	6.63417	8.73893	11.0973	14.8393	19.7627	25.2914	33.0375
0.739215	1.49693	2.45572	3.46048	4.92188	6.64909	8.74372	11.1179	14.8434	19.7765	25.3082	33.161
0.740962	1.49693	2.4595	3.46056	4.92188	6.64909	8.74583	11.1338	14.8678	19.8041	25.3601	33.2362
0.741587	1.49693	2.46094	3.47038	4.92627	6.64909	8.75737	11.1424	14.8739	19.8514	25.3668	33.2837
0.74212	1.50692	2.46094	3.47374	4.92802	6.65068	8.78234	11.1424	14.9221	19.8595	25.3681	33.3691
0.74339	1.5147	2.46094	3.47451	4.93367	6.66274	8.78386	11.1722	15.0117	19.8772	25.4085	33.3978
0.744784	1.51667	2.46094	3.48029	4.94642	6.67608	8.80452	11.1722	15.0137	19.8812	25.4252	33.4117
0.746367	1.51771	2.46094	3.48029	4.94914	6.69447	8.80717	11.1815	15.0198	19.9085	25.4573	33.5456
0.746966	1.52416	2.46094	3.49771	4.96531	6.71705	8.80897	11.2346	15.0412	19.9473	25.4937	33.7313
0.747319	1.52682	2.46094	3.50357	4.96566	6.73513	8.83542	11.2584	15.0621	19.9777	25.5274	33.7355
0.749611	1.53587	2.46771	3.50361	4.97415	6.74131	8.83542	11.2635	15.0621	19.9786	25.5325	33.7364
0.750555	1.53621	2.47068	3.5217	4.98302	6.74277	8.8591	11.2848	15.0922	20.0306	25.5535	33.8333
0.752527	1.54384	2.47204	3.52353	4.98302	6.7504	8.86279	11.3064	15.1102	20.0306	25.5774	33.8547
0.755091	1.5455	2.47321	3.52353	4.98302	6.77093	8.86279	11.3123	15.1244	20.0729	25.6292	33.9083
0.759587	1.55406	2.47321	3.52353	4.98302	6.77645	8.87304	11.323	15.1403	20.1512	25.6481	33.9163
0.760289	1.55619	2.47321	3.52353	4.99082	6.7888	8.87304	11.331	15.1403	20.1812	25.6974	33.9594
0.762702	1.55643	2.47321	3.52353	5.00457	6.81491	8.89008	11.3364	15.1497	20.1992	25.7118	33.9888
0.763007	1.55643	2.47566	3.54921	5.01828	6.82439	8.89008	11.363	15.1521	20.2434	25.7227	34.0021
0.765234	1.55643	2.47981	3.54921	5.01935	6.83769	8.89349	11.379	15.1678	20.2531	25.7247	34.0578
0.770257	1.55643	2.49562	3.56874	5.01935	6.85538	8.91144	11.395	15.2201	20.283	25.7553	34.0873
0.770678	1.55643	2.49833	3.57634	5.03261	6.85744	8.91389	11.4035	15.2615	20.2934	25.7647	34.1159
0.771076	1.55643	2.4987	3.58318	5.03464	6.86421	8.91531	11.4184	15.2619	20.3007	25.7705	34.1219
0.771234	1.55643	2.5029	3.58503	5.04942	6.86421	8.91729	11.4527	15.2895	20.3009	25.7826	34.1815
0.771727	1.55643	2.50967	3.62412	5.05027	6.86523	8.92069	11.4635	15.2895	20.3128	25.8098	34.2163
0.772155	1.55643	2.50967	3.62937	5.0581	6.88997	8.92612	11.4755	15.3126	20.3322	25.8272	34.2283
0.772281	1.55643	2.50967	3.63353	5.06738	6.89502	8.92675	11.4762	15.343	20.3471	25.8445	34.321
0.774532	1.55643	2.50967	3.63353	5.06738	6.90818	8.93702	11.5485	15.3488	20.3566	25.8445	34.3343
0.776903	1.55643	2.50967	3.63563	5.06738	6.90818	8.95795	11.6317	15.3548	20.3812	25.8618	34.3343
0.778217	1.56536	2.51688	3.64441	5.07076	6.91243	8.96407	11.6712	15.3834	20.4495	25.8806	34.4192
0.778217	1.56703	2.5175	3.64762	5.07335	6.93006	8.98158	11.6992	15.3843	20.4717	25.8867	34.4698
0.778217	1.56798	2.5197	3.64808	5.07335	6.95949	9.0253	11.7236	15.4071	20.5204	26.0871	34.4856
0.778217	1.56976	2.52859	3.65845	5.07918	6.99168	9.03216	11.8118	15.4145	20.5204	26.1032	34.5041
0.778217	1.57577	2.53029	3.65845	5.0817	6.9953	9.03569	11.8176	15.4237	20.666	26.1971	34.5488
0.778217	1.57577	2.53139	3.65845	5.08308	6.9953	9.05545	11.821	15.4373	20.6719	26.2017	34.59
0.778217	1.57577	2.53369	3.6652	5.0932	7.02876	9.06147	11.8323	15.4544	20.6746	26.2107	34.688
0.778217	1.57577	2.53369	3.67739	5.09475	7.04705	9.07549	11.8866	15.4883	20.6953	26.3012	34.7785
0.778217	1.57577	2.53369	3.6802	5.10191	7.05135	9.07622	11.8962	15.5088	20.7085	26.3056	34.8444
0.778217	1.57577	2.53369	3.69141	5.1112	7.06986	9.07883	11.9273	15.5181	20.7777	26.3056	34.8754
0.778217	1.57577	2.53369	3.69141	5.12624	7.08256	9.09232	11.9754	15.5465	20.8319	26.3228	34.8783
0.778217	1.57577	2.53369	3.69141	5.13859	7.09843	9.09517	12.0076	15.6081	20.8432	26.3236	34.8863
0.778217	1.58236	2.53369	3.69141	5.13859	7.13275	9.0971	12.0086	15.617	20.8763	26.3366	34.9445
0.778217	1.58414	2.53369	3.69141	5.14613	7.13414	9.09721	12.0611	15.6342	20.8846	26.3592	34.9567
0.778217	1.58528	2.54806	3.69141	5.14912	7.13672	9.11876	12.0686	15.698	20.8933	26.3814	34.9808
0.778217	1.58892	2.55334	3.69251	5.15561	7.14067	9.13535	12.0794	15.698	20.9194	26.4365	34.9855
0.778217	1.59053	2.56929	3.6996	5.16594	7.14096	9.13793	12.1206	15.7692	20.9205	26.4448	35.0174
0.778217	1.59314	2.56929	3.6996	5.16762	7.14253	9.13885	12.201	15.7807	20.9397	26.5257	35.0436
0.778217	1.5935	2.56929	3.701	5.19135	7.14314	9.15132	12.2088	15.8305	20.9758	26.5622	35.1625
0.778217	1.60117	2.56929	3.70273	5.19135	7.15367	9.15522	12.2262	15.8764	20.9888	26.5827	35.1639
0.778217	1.60277	2.56929	3.70657	5.19135	7.15367	9.17521	12.2312	15.9055	21.0032	26.6202	35.2228
0.778217	1.6046	2.56997	3.72402	5.19416	7.16636	9.18629	12.2405	15.9069	21.0048	26.6373	35.2249
0.778217	1.60591	2.57411	3.72407	5.21636	7.1748	9.18823	12.2477	15.9223	21.0891	26.6811	35.2306
0.778217	1.61034	2.57958	3.72734	5.23202	7.2042	9.18823	12.2603	15.9224	21.1439	26.7473	35.2602
0.778217	1.61415	2.57979	3.74839	5.24414	7.23064	9.21456	12.2636	15.9232	21.1655	26.7711	35.3693
0.778217	1.61789	2.58436	3.74839	5.24957	7.23249	9.21456	12.2951	15.941	21.1854	26.7751	35.4546
0.778217	1.63735	2.58706	3.74839	5.26088	7.23752	9.22441	12.3071	15.953	21.1869	26.8287	35.4997
0.778217	1.63926	2.59248	3.74945	5.26088	7.23783	9.23213	12.3071	15.9582	21.2155	26.8547	35.5427
0.778217	1.64867	2.60965	3.75646	5.26546	7.23783	9.24341	12.3145	15.9609	21.2395	26.8648	35.5688
0.778217	1.65084	2.61601	3.76451	5.27848	7.24715	9.24972	12.344	15.9637	21.2817	26.8649	35.5888
0.778217	1.65085	2.61601	3.76451	5.28386	7.24729	9.27546	12.3563	15.972	21.2939	26.8738	35.7029
0.778217	1.65085	2.61601	3.76451	5.28446	7.26706	9.30762	12.4159	15.9961	21.297	26.9012	35.7486
0.778217	1.65085	2.61601	3.77845	5.29752	7.26706	9.31755	12.4511	15.9968	21.3237	26.9189	35.7835
0.778217	1.65085	2.61613	3.78433	5.30122	7.27123	9.3548	12.4758	15.998	21.4701	26.9694	35.8687
0.778217	1.65085	2.61897	3.7919	5.31243	7.27505	9.36287	12.5411	15.9986	21.4793	26.9703	35.8766
0.778217	1.65085	2.62042	3.80557	5.32382	7.2857	9.37097	12.5532	16.0716	21.5005	26.971	35.8832
0.778537	1.65085	2.62234	3.81662	5.33586	7.29815	9.39358	12.5687	16.1093	21.5977	27.0009	36.0088
0.778575	1.65085	2.62318	3.8204	5.34372	7.32248	9.39897	12.5701	16.1332	21.6115	27.0132	36.0296
0.778778	1.65085	2.62666	3.8204	5.36269	7.34168	9.39967	12.5773	16.1351	21.6331	27.0356	36.0483
0.778916	1.65416	2.63006	3.82713	5.39726	7.34168	9.40323	12.5896	16.1834	21.6938	27.0577	36.0559
0.78017	1.65512	2.6427	3.84779	5.40286	7.36163	9.45011	12.5989	16.2722	21.7856	27.0985	36.1892
0.78094	1.65545	2.64403	3.84851	5.40286	7.36332	9.46398	12.611	16.2739	21.8012	27.1718	36.2627
0.781732	1.65818	2.65051	3.85198	5.4148	7.36399	9.46742	12.615	16.3349	21.804	27.1875	36.2894
0.782468	1.66588	2.65051	3.85266	5.41965	7.37127	9.47475	12.6685	16.3673	21.8414	27.2187	36.2929
0.78474	1.66912	2.66191	3.87698	5.41965	7.3746	9.49569	12.6685	16.3833	21.8581	27.2265	36.3503
0.785109	1.6741	2.66191	3.88394	5.42579	7.38281	9.50209	12.7027	16.4253	21.9134	27.2643	36.3758
0.78539	1.676	2.66191	3.89108	5.42743	7.38281	9.5502	12.7043	16.5048	21.9148	27.3563	36.3903
0.791528	1.67692	2.66658	3.89108	5.4293	7.40329	9.55655	12.7447	16.5284	21.9189	27.4711	36.6073
0.792056	1.68174	2.67399	3.89108	5.43639	7.4136	9.56681	12.763	16.5543	21.9639	27.5619	36.8262
0.792304	1.70096	2.7021	3.89108	5.43639	7.42667	9.58902	12.7637	16.5543	22.014	27.5727	36.8459
0.796253	1.70176	2.70231	3.9018	5.46417	7.44716	9.60081	12.7898	16.5552	22.0402	27.7188	36.8583
0.800038	1.70341	2.70618	3.90943	5.46778	7.46486	9.61027	12.7898	16.578	22.117	27.7267	36.8591
0.801431	1.70646	2.70703	3.91624	5.47578	7.46735	9.61814	12.8298	16.5831	22.1231	27.777	36.9346
0.805133	1.70758	2.70703	3.9361	5.48453	7.4725	9.61929	12.8347	16.6418	22.1238	27.8045	36.9867
0.805345	1.71132	2.70703	3.9375	5.50282	7.47736	9.62061	12.8465	16.6973	22.1381	27.8309	37.023
0.806313	1.71627	2.70703	3.9375	5.50282	7.48465	9.62771	12.8935	16.7362	22.1523	27.8619	37.0507
0.806938	1.71843	2.71376	3.94518	5.50282	7.48465	9.64733	12.8957	16.7412	22.1676	27.8641	37.1333
0.811697	1.72266	2.71819	3.94518	5.50764	7.48465	9.66995	12.9014	16.7507	22.1826	27.8967	37.222
0.812132	1.72266	2.71819	3.94544	5.53027	7.54018	9.67621	12.9146	16.7527	22.2164	27.9153	37.2809
0.819864	1.72419	2.71819	3.94628	5.57933	7.5491	9.69324	12.9193	16.7579	22.2317	27.9162	37.285
0.821068	1.72802	2.72715	3.96814	5.59011	7.54945	9.71057	12.9193	16.7595	22.2516	28.0266	37.6578
0.822097	1.72808	2.73439	3.96814	5.60954	7.54961	9.73549	12.9193	16.7796	22.2923	28.0517	37.7616
0.822723	1.74015	2.74642	3.96814	5.6118	7.56456	9.77662	12.9521	16.8975	22.2983	28.0776	37.7674
0.82443	1.74015	2.75141	3.96814	5.6118	7.58113	9.78826	12.9645	16.9135	22.3417	28.086	37.944
0.825661	1.74015	2.75141	3.96814	5.6118	7.59483	9.7975	12.9871	16.945	22.3417	28.1148	38.0969
0.829447	1.74015	2.75141	3.96814	5.61282	7.60282	9.7975	12.9871	17.0445	22.3417	28.1248	38.2016
0.833577	1.74015	2.75141	3.97577	5.61719	7.61598	9.80677	12.9941	17.0924	22.3509	28.2097	38.3693
0.833902	1.74015	2.75141	3.97765	5.61719	7.61601	9.8078	12.9986	17.1367	22.4005	28.3617	38.5116
0.835146	1.74015	2.75141	3.98787	5.61719	7.61629	9.81399	13.0112	17.1435	22.4108	28.3617	38.6179
0.83615	1.74015	2.75141	3.98796	5.62258	7.63287	9.81617	13.015	17.1702	22.4688	28.5469	38.6179
0.836589	1.74015	2.75141	3.98971	5.6655	7.63287	9.82528	13.0244	17.2072	22.4786	28.5723	38.7056
0.837267	1.74015	2.75141	4.00022	5.6655	7.6408	9.84683	13.0244	17.2283	22.5014	28.5988	38.7439
0.838171	1.74015	2.75141	4.00158	5.6655	7.64477	9.85605	13.0276	17.2336	22.5038	28.6654	38.9552
0.838994	1.74015	2.76033	4.00612	5.68152	7.65664	9.87105	13.0314	17.2384	22.5122	28.7171	39.0863
0.840955	1.74015	2.77154	4.00612	5.7081	7.66521	9.89285	13.0453	17.2944	22.5235	28.8944	39.1668
0.842027	1.74491	2.77297	4.00612	5.72399	7.66833	9.89285	13.0453	17.3684	22.5387	28.9513	39.2926
0.844264	1.75311	2.7778	4.03164	5.73777	7.68636	9.89897	13.0615	17.4015	22.5387	28.9702	39.3017
0.850068	1.75419	2.78227	4.03624	5.74261	7.68732	9.89897	13.0801	17.4258	22.5616	28.9702	39.3334
0.851052	1.75692	2.78423	4.03624	5.7545	7.69215	9.90814	13.0878	17.4432	22.5641	28.9964	39.3516
0.851306	1.77054	2.79449	4.03849	5.76091	7.69215	9.91434	13.0986	17.4896	22.5928	29.047	39.4557
0.851656	1.77209	2.79632	4.04618	5.76532	7.71351	9.92036	13.0986	17.5591	22.6219	29.079	39.4679
0.852083	1.77287	2.79898	4.05868	5.7673	7.7275	9.97064	13.1187	17.5848	22.6219	29.1203	39.6303
0.852211	1.77461	2.799	4.05868	5.76884	7.7275	10.0114	13.1194	17.597	22.6446	29.1627	39.8041
0.853268	1.77461	2.80225	4.06273	5.7759	7.7275	10.0183	13.1234	17.6434	22.6583	29.2479	40.016
0.855607	1.77461	2.8059	4.06428	5.79236	7.7408	10.0206	13.1527	17.6993	22.7487	29.2875	40.0528
0.856173	1.77461	2.8059	4.07358	5.80145	7.77049	10.0231	13.1814	17.7222	22.7579	29.342	40.2045
0.863469	1.77461	2.8059	4.09582	5.80802	7.78217	10.037	13.1907	17.7773	22.7961	29.3513	40.4016
0.863697	1.77461	2.8059	4.09582	5.80975	7.78323	10.0387	13.2012	17.8414	22.8006	29.4378	41.7359
0.866482	1.77461	2.8059	4.09582	5.81085	7.79761	10.0538	13.2068	17.8672	22.8377	29.4503	43.8524
0.868624	1.77461	2.81271	4.10726	5.82246	7.82098	10.0898	13.2182	17.8956	22.861	29.4708	44.6396
0.869068	1.77461	2.8137	4.11435	5.83106	7.83259	10.1125	13.2297	17.9311	22.9782	29.4722	45.0446
0.870296	1.77461	2.81436	4.11531	5.83169	7.84802	10.1166	13.2298	17.9632	23.0116	29.562	45.1349
0.878385	1.77461	2.8171	4.12006	5.83374	7.84804	10.1168	13.2457	17.9701	23.0206	29.5825	45.3362
0.881576	1.77461	2.83904	4.12528	5.83403	7.85189	10.1215	13.2731	17.98	23.0438	29.7573	45.8118
0.88266	1.77461	2.84349	4.16327	5.83403	7.87006	10.1292	13.2982	17.9918	23.0463	29.8139	46.709
0.885562	1.77461	2.84445	4.16879	5.86815	7.89608	10.1646	13.3209	18.0396	23.0669	29.8424	47.2221
0.886499	1.78903	2.85051	4.18359	5.87025	7.90953	10.1973	13.3275	18.0955	23.1157	29.89	47.4648
0.887304	1.79159	2.85753	4.18359	5.89214	7.94888	10.2214	13.3287	18.1009	23.1184	29.9598	47.4799
0.887304	1.79159	2.85973	4.18359	5.89336	7.96293	10.2455	13.3708	18.166	23.1341	29.975	47.6556
0.887304	1.79159	2.87286	4.18911	5.90437	7.97055	10.2587	13.3708	18.2259	23.1603	29.9994	47.9325
0.887304	1.79159	2.88045	4.19083	5.90625	7.97055	10.2772	13.3822	18.2421	23.223	30.0849	48.037
0.887304	1.79159	2.88045	4.20537	5.90906	7.97156	10.2801	13.3822	18.2527	23.2529	30.1251	48.2382
0.887304	1.79159	2.88045	4.21245	5.91137	7.9739	10.2801	13.3935	18.2546	23.2594	30.1312	48.9585
0.887304	1.79159	2.88045	4.21245	5.91218	7.98165	10.3066	13.4061	18.3156	23.2659	30.1533	49.266
0.887304	1.79626	2.89051	4.21307	5.9165	7.99157	10.3098	13.4341	18.3177	23.2699	30.1934	49.4291
0.887304	1.80576	2.89514	4.23882	5.92672	8.01223	10.3162	13.4567	18.3498	23.3115	30.2205	49.7727
0.887304	1.80708	2.90958	4.24109	5.92672	8.01223	10.3174	13.4823	18.3666	23.3335	30.2655	50.2057
0.887304	1.80785	2.91473	4.24415	5.92672	8.01601	10.3268	13.5174	18.3682	23.3444	30.3228	50.5287
0.887304	1.8109	2.93252	4.24805	5.92672	8.02258	10.3389	13.5374	18.3714	23.3455	30.3558	50.7658
0.887304	1.81865	2.93762	4.24824	5.92672	8.03488	10.3389	13.5553	18.4439	23.3595	30.3764	50.9211
0.887304	1.83302	2.94164	4.24824	5.92695	8.05591	10.3788	13.5776	18.4709	23.4113	30.3883	51.451
0.887304	1.84398	2.94779	4.24824	5.93154	8.06214	10.3823	13.5776	18.4797	23.4507	30.3903	51.6332
0.887304	1.85228	2.95303	4.24824	5.95221	8.12482	10.3903	13.585	18.4833	23.4733	30.3903	51.6705
0.887304	1.85706	2.95312	4.24824	5.96221	8.13599	10.4409	13.6317	18.498	23.5274	30.3967	51.9985
0.887304	1.86799	2.95553	4.26445	5.96271	8.14622	10.443	13.6488	18.5372	23.5351	30.4242	52.0176
0.887304	1.8698	2.95981	4.29784	5.97188	8.15087	10.464	13.6692	18.5935	23.5491	30.4401	52.0578
0.887304	1.87139	2.96267	4.29784	5.98391	8.15458	10.4755	13.6768	18.6074	23.666	30.8178	52.2061
0.887304	1.87195	2.96336	4.3002	5.98772	8.18054	10.4785	13.6776	18.6204	23.666	30.9106	52.6046
0.887304	1.87233	2.96336	4.30488	5.99277	8.18054	10.4866	13.6866	18.623	23.6992	30.9384	54.5307
0.887304	1.87419	2.96336	4.30488	5.99277	8.20181	10.4903	13.6869	18.6269	23.719	30.9589	56.4048
0.887304	1.87419	2.96336	4.31056	6.03306	8.21715	10.492	13.7068	18.6529	23.7528	30.9589	58.0561
0.887304	1.87419	2.96336	4.3241	6.05311	8.22119	10.5026	13.7118	18.6602	23.7582	31.017	59.5332
0.887304	1.87419	2.96336	4.33255	6.07242	8.22483	10.5131	13.721	18.6915	23.7949	31.0732	60.7866
0.887304	1.87419	2.96336	4.34809	6.07807	8.24681	10.5333	13.7284	18.6918	23.7949	31.1318	61.9512
0.887304	1.87419	2.97356	4.35384	6.08802	8.25424	10.5522	13.7841	18.6961	23.7949	31.1617	62.8486
0.887304	1.87419	2.97356	4.35409	6.08802	8.26786	10.5806	13.8032	18.7177	23.8317	31.1757	63.7575
0.887304	1.87419	2.97356	4.36079	6.08945	8.28481	10.5935	13.8356	18.7322	23.871	31.1986	64.5008
0.887304	1.87425	2.97356	4.36079	6.096	8.30805	10.6163	13.8536	18.7483	23.8762	31.2152	64.9322
0.887304	1.8838	2.97467	4.37968	6.09759	8.31066	10.6163	13.8601	18.7823	23.8914	31.2405
0.887304	1.88722	2.99039	4.38157	6.10208	8.3117	10.7213	13.8885	18.8336	24.0014	31.2598
0.887304	1.89029	2.99073	4.38901	6.13653	8.31177	10.7439	13.9212	18.8643	24.0014	31.2655
0.887304	1.91214	2.99386	4.40915	6.15234	8.32728	10.7636	13.9212	18.874	24.0348	31.2681
0.887304	1.9169	2.99386	4.4183	6.15234	8.32728	10.7639	13.9299	18.8898	24.0682	31.3091
0.887304	1.9178	2.99751	4.42494	6.15234	8.32866	10.7945	13.932	18.9334	24.1034	31.37
0.887304	1.92205	3.00396	4.42969	6.15726	8.32978	10.7945	13.9776	18.9412	24.1184	31.4387
0.887304	1.92205	3.00396	4.42969	6.15807	8.33764	10.8057	14.0079	18.9508	24.1573	31.4885
0.887304	1.92205	3.00396	4.43652	6.16709	8.35509	10.8113	14.0273	18.9556	24.1623	31.4885
0.887304	1.92205	3.00396	4.43652	6.172	8.35643	10.8281	14.0295	18.9556	24.1749	31.5243
0.887304	1.92205	3.0046	4.43652	6.172	8.36719	10.8351	14.0446	18.9636	24.2124	31.5681
0.887304	1.92205	3.02912	4.43652	6.19648	8.36719	10.8651	14.0868	18.9891	24.2349	31.5716
0.887304	1.92205	3.03797	4.43652	6.19648	8.36719	10.8728	14.0877	18.9954	24.2579	31.579
0.887304	1.92205	3.03907	4.4512	6.21229	8.36719	10.9077	14.1027	19.0067	24.3285	31.6081
0.887304	1.92344	3.04401	4.45695	6.21332	8.37201	10.9228	14.122	19.0735	24.3384	31.6993
0.887304	1.92367	3.04401	4.46316	6.22573	8.37796	10.9369	14.1436	19.0782	24.4104	31.7137
0.887304	1.92902	3.04401	4.46512	6.22573	8.38165	10.9417	14.1738	19.1338	24.4973	31.7578
0.887304	1.93666	3.04401	4.48033	6.22742	8.38165	10.9793	14.1919	19.1506	24.5001	31.7813
0.887304	1.94459	3.04583	4.49079	6.2306	8.38165	10.9929	14.1982	19.1866	24.5724	31.8608
0.887691	1.94823	3.04895	4.49079	6.27418	8.3881	11.0011	14.2187	19.1953	24.5749	31.8873
0.88946	1.95033	3.0608	4.49937	6.28865	8.3997	11.0605	14.2315	19.1969	24.5909	31.959
0.890407	1.95254	3.06098	4.51768	6.30788	8.41186	11.0605	14.2632	19.2016	24.6057	31.9893
0.890476	1.95285	3.07015	4.52271	6.35094	8.4177	11.0605	14.3073	19.2205	24.6291	32.0965
0.890714	1.96328	3.07218	4.52438	6.38316	8.4177	11.0789	14.3327	19.2577	24.6549	32.1433
0.895517	1.96875	3.0744	4.52438	6.38422	8.42435	11.0852	14.4086	19.2821	24.6552	32.1507
0.895915	1.96875	3.07644	4.53774	6.40317	8.42489	11.1206	14.4212	19.3227	24.6915	32.1583
0.897557	1.96875	3.08355	4.53774	6.40843	8.43785	11.1515	14.4606	19.3728	24.7235	32.2044
0.897614	1.96875	3.08355	4.53774	6.41734	8.43915	11.1614	14.5279	19.3914	24.7409	32.2408
0.899677	1.96875	3.08998	4.55554	6.41734	8.47133	11.1722	14.5406	19.3962	24.7627	32.2665
0.90005	1.96875	3.09238	4.56112	6.44089	8.47277	11.2074	14.5695	19.4149	24.7872	32.365
0.906281	1.97703	3.097	4.59741	6.45967	8.47506	11.2174	14.5944	19.4663	24.8017	32.4103
0.907766	1.98083	3.10404	4.61121	6.47372	8.47744	11.2236	14.5944	19.5285	24.8074	32.4853
0.911288	1.98092	3.10844	4.61655	6.47372	8.49454	11.2263	14.6167	19.5346	24.8177	32.5173
0.913703	1.98208	3.10955	4.62368	6.47886	8.50004	11.2286	14.648	19.547	24.8274	32.5328
0.915871	1.98407	3.11069	4.62368	6.47987	8.52849	11.2296	14.6524	19.6766	24.8276	32.5775
0.917754	1.98407	3.11287	4.63054	6.48199	8.53454	11.2355	14.6524	19.689	24.8315	32.7736
0.922122	1.98407	3.11416	4.64269	6.48534	8.54216	11.2452	14.7641	19.7034	24.8829	32.9297
0.922428	1.98407	3.11575	4.64329	6.49706	8.54268	11.2452	14.7836	19.7198	24.8993	32.9478
0.924491	1.98407	3.14046	4.64474	6.49706	8.55348	11.3123	14.7861	19.7551	24.9161	32.9739
0.92534	1.98407	3.15136	4.66266	6.49706	8.57576	11.3165	14.7984	19.7655	24.9285	32.9968
0.928551	1.98407	3.15154	4.67432	6.50172	8.57662	11.323	14.8066	19.7861	24.9647	33.0411
0.931348	1.98407	3.15256	4.67794	6.50476	8.57863	11.323	14.8168	19.8008	24.9736	33.1717
0.932596	1.98407	3.16317	4.68225	6.50866	8.57885	11.3232	14.8195	19.8774	25.069	33.2248
0.933116	1.98407	3.1684	4.68225	6.51404	8.58162	11.331	14.8364	19.9397	25.0693	33.2377
0.933482	1.98407	3.17384	4.68225	6.51568	8.58743	11.331	14.8494	19.9711	25.0993	33.2434
0.936976	1.98407	3.17418	4.68234	6.51568	8.59015	11.3453	14.8678	19.9854	25.1365	33.2481
0.941918	1.98407	3.17525	4.69932	6.5198	8.59296	11.355	14.9322	20.0003	25.144	33.296
0.943132	1.98407	3.17752	4.70161	6.55275	8.59614	11.355	14.945	20.0124	25.145	33.3064
0.955479	1.98407	3.18274	4.70161	6.56073	8.60555	11.363	14.9851	20.0486	25.151	33.3801
0.961879	1.98407	3.18852	4.70161	6.57451	8.61328	11.363	14.9943	20.0502	25.2219	33.3863
0.964053	1.98407	3.19922	4.70161	6.59962	8.61333	11.363	15.0117	20.0548	25.2555	33.4
0.965313	1.98667	3.19922	4.73371	6.60763	8.62733	11.3763	15.0842	20.0804	25.2588	33.4203
0.965652	2.00089	3.19922	4.73371	6.6227	8.64136	11.3849	15.1184	20.1271	25.2822	33.4246
0.967784	2.00631	3.20286	4.73371	6.62628	8.64136	11.387	15.1263	20.1572	25.2914	33.4966
0.969362	2.01078	3.20867	4.74009	6.64453	8.64486	11.3965	15.1541	20.1632	25.3381	33.4995
0.970228	2.0242	3.20867	4.74642	6.6603	8.66289	11.4003	15.1856	20.1767	25.4331	33.4995
0.970639	2.0247	3.20867	4.75286	6.66258	8.66707	11.4348	15.2532	20.1932	25.4344	33.4995
0.971075	2.02934	3.20867	4.77828	6.66274	8.66935	11.4368	15.2657	20.2037	25.4621	33.5176
0.973169	2.02934	3.20867	4.77828	6.67017	8.69725	11.448	15.2837	20.2037	25.4633	33.5853
0.973638	2.02934	3.20867	4.77828	6.6823	8.69877	11.4506	15.298	20.2336	25.6056	33.6393
0.974024	2.02934	3.217	4.77828	6.68542	8.699	11.4506	15.3548	20.3009	25.6186	33.6609
0.975713	2.02934	3.23686	4.78674	6.69447	8.70769	11.4506	15.3764	20.3019	25.6536	33.6743
0.980693	2.02934	3.23686	4.80799	6.69447	8.77923	11.4718	15.3854	20.3366	25.6736	33.6888
0.983315	2.0294	3.23686	4.81961	6.70144	8.79709	11.5218	15.4035	20.3545	25.7682	33.74
0.984375	2.03038	3.23686	4.83498	6.7575	8.8217	11.5337	15.4118	20.3731	25.7929	33.7436
0.984375	2.03233	3.23944	4.83853	6.76941	8.85843	11.5349	15.4177	20.3762	25.7938	33.783
0.984375	2.04318	3.24135	4.8507	6.77093	8.87645	11.5349	15.4245	20.3768	25.8255	33.7929
0.984375	2.05244	3.26952	4.85373	6.7888	8.89008	11.5349	15.4256	20.3917	25.8867	33.8281
0.984375	2.07271	3.2833	4.85373	6.80662	8.89349	11.5349	15.4468	20.4184	26.0661	33.852
0.984375	2.07291	3.2833	4.85922	6.80662	8.91729	11.5533	15.4472	20.4184	26.1134	33.9038
0.984656	2.07423	3.2833	4.86369	6.80963	8.92069	11.5664	15.5059	20.4448	26.1864	33.9821
0.985515	2.07444	3.2833	4.87241	6.83769	8.92069	11.5674	15.5195	20.4495	26.1937	34.0033
0.986351	2.08817	3.2833	4.88482	6.84834	8.94442	11.569	15.5314	20.4624	26.1942	34.0122
0.992959	2.08817	3.2833	4.89905	6.84981	8.9461	11.569	15.5601	20.4672	26.2168	34.0188
0.993033	2.08817	3.2861	4.90049	6.86752	8.9478	11.569	15.575	20.4746	26.2353	34.125
0.993983	2.08817	3.29309	4.90338	6.87055	8.95497	11.5756	15.6007	20.485	26.2399	34.1628
0.994317	2.08817	3.29321	4.90338	6.88378	8.98007	11.5899	15.6022	20.485	26.284	34.2601
0.995338	2.08817	3.30169	4.91671	6.89062	8.99293	11.6619	15.6086	20.5204	26.3023	34.2838
0.995528	2.08817	3.30169	4.92444	6.89502	9.00313	11.6625	15.6327	20.5544	26.3179	34.2942
0.996023	2.08817	3.30495	4.92802	6.89502	9.01187	11.6681	15.6594	20.5558	26.3332	34.321
0.998731	2.08817	3.30753	4.92802	6.90818	9.01705	11.6707	15.6782	20.5868	26.3332	34.5532
0.999305	2.08817	3.31085	4.95254	6.90818	9.0253	11.6733	15.6826	20.5906	26.3332	34.6026
0.999584	2.0969	3.31085	4.97694	6.93006	9.0253	11.6914	15.7089	20.6044	26.3814	34.6364
0.999767	2.10091	3.31085	4.97694	6.93006	9.02721	11.692	15.7442	20.6264	26.4193	34.6398
1.00156	2.10263	3.33596	4.9789	6.94733	9.03134	11.7405	15.8363	20.6264	26.4594	34.8823
1.00519	2.10263	3.3432	4.98302	6.94752	9.05068	11.7637	15.897	20.6367	26.5051	34.9877
1.00621	2.10263	3.34724	4.98302	6.94943	9.06396	11.7717	15.9012	20.6456	26.5428	35.0572
1.00724	2.10263	3.34724	4.98302	6.9686	9.10547	11.7766	15.9069	20.652	26.5622	35.187
1.00773	2.10263	3.34724	5.01217	6.97325	9.10547	11.7843	15.9582	20.6602	26.5622	35.2567
1.00831	2.10263	3.34724	5.01935	6.9953	9.11876	11.9044	15.9715	20.7085	26.6198	35.3632
1.00902	2.10263	3.34724	5.01935	6.99963	9.13535	11.907	15.9806	20.7089	26.6373	35.528
1.00998	2.10318	3.34724	5.01935	6.99963	9.13535	11.9081	16.0094	20.7094	26.639	35.6034
1.0135	2.11698	3.34724	5.03926	7.02216	9.14529	11.9374	16.032	20.7682	26.6554	35.6045
1.01384	2.11698	3.35068	5.04426	7.03302	9.15852	12.0158	16.0408	20.7883	26.7338	35.7404
1.01467	2.11698	3.37927	5.04837	7.0465	9.1691	12.0183	16.0641	20.7902	26.7869	35.836
1.01467	2.11698	3.38137	5.05609	7.04705	9.2045	12.0183	16.0769	20.8193	26.8682	35.8377
1.01467	2.11698	3.39437	5.06391	7.06609	9.22999	12.0209	16.1002	20.8193	26.8738	36.149
1.01467	2.11698	3.40308	5.0661	7.07602	9.2343	12.0506	16.1487	20.8893	26.8862	36.1724
1.01467	2.11698	3.41884	5.07335	7.09843	9.24736	12.0611	16.2406	20.957	26.9268	36.3561
1.01467	2.11698	3.41884	5.07335	7.12761	9.26699	12.0651	16.3092	21.0277	26.9268	36.3561
1.01467	2.11698	3.42769	5.07335	7.13672	9.27158	12.0661	16.3168	21.034	26.9268	36.6538
1.01467	2.12853	3.42769	5.07335	7.14049	9.27679	12.0661	16.3611	21.0767	26.9322	37.0916
1.01467	2.13404	3.43099	5.07645	7.14096	9.28827	12.0686	16.3611	21.1231	26.9543	37.1479
1.01467	2.13497	3.43555	5.07797	7.15367	9.30152	12.0812	16.3821	21.1412	27.0132	37.1935
1.01467	2.13657	3.45409	5.08309	7.16636	9.3078	12.0812	16.4636	21.1655	27.0163	37.309
1.01467	2.14382	3.45409	5.09723	7.16636	9.32935	12.0987	16.4677	21.2412	27.0446	37.3949
1.01467	2.15179	3.45409	5.11889	7.19691	9.3386	12.1211	16.4736	21.2455	27.06	37.4839
1.01467	2.15746	3.45834	5.12088	7.20429	9.35156	12.1487	16.4956	21.264	27.077	37.5825
1.01467	2.15808	3.46674	5.12088	7.20858	9.35549	12.149	16.5176	21.2977	27.0882	37.7319
1.01467	2.15908	3.48029	5.13859	7.22321	9.37097	12.1526	16.5762	21.3192	27.131	37.8201
1.01467	2.16213	3.48029	5.13859	7.23242	9.37097	12.184	16.578	21.3237	27.1463	38.1564
1.01467	2.16338	3.48029	5.13859	7.23783	9.37737	12.1977	16.5908	21.3397	27.1608	38.4064
1.01467	2.16772	3.48029	5.13859	7.24202	9.39208	12.2035	16.5926	21.3628	27.2309	38.493
1.01467	2.16902	3.48029	5.13959	7.24202	9.39522	12.2068	16.5981	21.3944	27.282	39.0817
1.01467	2.17447	3.48029	5.15446	7.25029	9.3976	12.2134	16.6418	21.3988	27.3264	39.1668
1.01467	2.18108	3.48029	5.17382	7.25834	9.41246	12.2183	16.6546	21.4045	27.48	39.1668
1.01467	2.18437	3.48029	5.17749	7.26706	9.41932	12.2207	16.6634	21.5736	27.5141	39.504
1.01467	2.18894	3.48322	5.19099	7.27129	9.41932	12.2232	16.6646	21.5762	27.5845	40.0113
1.01467	2.19579	3.49765	5.19135	7.28978	9.43217	12.2257	16.7362	21.6184	27.6294	40.1049
1.01467	2.19733	3.49765	5.19135	7.3033	9.49935	12.2603	16.7579	21.6576	27.6349	40.1453
1.01467	2.20113	3.505	5.19955	7.30635	9.50572	12.2831	16.7723	21.6673	27.7606	40.7918
1.01467	2.20113	3.52353	5.2012	7.31669	9.50627	12.2935	16.7796	21.6686	27.8655	40.8214
1.01467	2.20113	3.52353	5.22044	7.31689	9.5089	12.3033	16.7796	21.6856	27.8739	41.7729
1.01467	2.20113	3.52353	5.22044	7.31689	9.5373	12.3268	16.7934	21.689	27.8782	42.3517
1.01467	2.20113	3.52353	5.22044	7.3277	9.53774	12.3454	16.807	21.6912	27.9173	43.4518
1.01467	2.20113	3.52353	5.22044	7.34168	9.5437	12.3484	16.8086	21.6912	27.9476	44.5544
1.01467	2.21281	3.52353	5.2239	7.34168	9.57238	12.3661	16.8875	21.7133	27.9522	44.7236
1.01467	2.21297	3.52353	5.25075	7.34743	9.57238	12.3835	16.909	21.7261	27.9563	45.0722
1.01467	2.21467	3.52353	5.26088	7.34893	9.57238	12.4149	16.9669	21.7605	28.0989	45.0823
1.01467	2.21484	3.54309	5.26088	7.3794	9.57238	12.4275	16.968	21.8004	28.1416	45.3181
1.01467	2.21484	3.54791	5.28386	7.38017	9.57238	12.4369	16.968	21.8151	28.1516	45.5308
1.01467	2.21484	3.54921	5.28386	7.38281	9.57555	12.4571	16.968	21.8747	28.199	45.6531
1.01467	2.21484	3.54921	5.28386	7.38281	9.60081	12.5024	16.9876	21.9289	28.2097	46.046
1.01467	2.21484	3.54921	5.28386	7.38691	9.61027	12.5203	17.0134	21.9686	28.2694	46.1824
1.01467	2.21579	3.54921	5.28494	7.39653	9.61027	12.5532	17.0315	21.9859	28.3115	46.2295
1.0157	2.21732	3.55626	5.29277	7.40261	9.64313	12.5626	17.0445	21.9998	28.3649	46.2885
1.01833	2.2237	3.55747	5.30102	7.40329	9.648	12.5837	17.0942	22.0033	28.3655	46.4327
1.02383	2.2246	3.55899	5.30894	7.41025	9.65305	12.5989	17.1208	22.0113	28.4022	46.8012
1.02547	2.22684	3.57071	5.31243	7.41963	9.65356	12.6245	17.1367	22.012	28.4078	47.2089
1.02755	2.22847	3.58318	5.31916	7.41963	9.68559	12.6493	17.1579	22.0182	28.4289	47.2642
1.0312	2.22847	3.58318	5.32382	7.41963	9.69369	12.6685	17.1949	22.0201	28.4523	47.4404
1.03131	2.22847	3.58318	5.34658	7.42328	9.70436	12.6685	17.2002	22.0388	28.5065	47.5808
1.03453	2.22847	3.58318	5.35592	7.44038	9.70537	12.6828	17.2336	22.0428	28.515	47.7002
1.03657	2.22847	3.58399	5.35901	7.48441	9.7114	12.7019	17.2336	22.0919	28.5311	47.8587
1.03776	2.22847	3.61021	5.36011	7.48465	9.72289	12.7043	17.2336	22.1101	28.535	48.0451
1.03791	2.22847	3.62381	5.37756	7.4949	9.75103	12.7708	17.2424	22.1389	28.5592	48.3132
1.04102	2.22847	3.63164	5.39726	7.50479	9.76034	12.7801	17.2547	22.1478	28.5691	48.7969
1.04192	2.22847	3.63353	5.39726	7.50966	9.80059	12.7913	17.2742	22.149	28.6083	49.0699
1.04409	2.22847	3.63509	5.41406	7.51292	9.80059	12.7992	17.2827	22.1858	28.6147	49.2204
1.04409	2.2344	3.64499	5.41406	7.51292	9.80059	12.8347	17.2845	22.2153	28.6321	49.5854
1.04409	2.24802	3.65845	5.41406	7.53147	9.8027	12.876	17.2897	22.2535	28.8108	50.9528
1.04409	2.24936	3.65845	5.41965	7.53304	9.80383	12.8818	17.3544	22.2575	28.877	52.3488
1.04409	2.25241	3.65845	5.41965	7.53908	9.82076	12.8938	17.4015	22.2869	28.8923	53.5927
1.04409	2.26593	3.65845	5.41965	7.53999	9.82247	12.9146	17.438	22.3228	28.9044	54.9256
1.04409	2.26887	3.65845	5.41965	7.54192	9.83393	12.9193	17.4445	22.3254	28.9076	56.2407
1.04409	2.26887	3.6798	5.42815	7.54371	9.83452	12.9787	17.4698	22.3277	28.9098	57.7259
1.04409	2.26887	3.68436	5.43639	7.54402	9.83452	12.9907	17.4755	22.3458	28.9594	59.1189
1.04409	2.26887	3.68529	5.43639	7.56692	9.83869	12.9965	17.4882	22.3821	29.0221	59.6439
1.04409	2.26887	3.69141	5.44405	7.56727	9.84375	13.0151	17.5142	22.3837	29.0576	60.1664
1.04409	2.26887	3.69141	5.45893	7.57354	9.84375	13.043	17.5572	22.3959	29.0807	60.3596
1.04737	2.26887	3.69141	5.46417	7.57438	9.84683	13.0777	17.5588	22.4647	29.1515	60.5561
1.04837	2.26887	3.69141	5.46481	7.59709	9.85381	13.0983	17.6272	22.5293	29.2399
1.05258	2.26887	3.6996	5.47464	7.60131	9.85605	13.115	17.6434	22.5575	29.2758
1.05345	2.26887	3.6996	5.47725	7.62891	9.86142	13.1194	17.6862	22.5884	29.2799
1.0548	2.26887	3.6996	5.48524	7.6408	9.86382	13.1263	17.7205	22.642	29.3048
1.06101	2.27398	3.72407	5.48948	7.6437	9.88082	13.1263	17.7461	22.6647	29.4378
1.06147	2.2935	3.73425	5.50282	7.64477	9.88366	13.1263	17.7495	22.6689	29.4429
1.06514	2.29839	3.74839	5.50282	7.64477	9.88537	13.1301	17.7587	22.6847	29.4878
1.06899	2.32159	3.74839	5.5215	7.65409	9.89285	13.1332	17.7802	22.7181	29.5011
1.06982	2.32164	3.75271	5.53027	7.66455	9.90814	13.1447	17.8346	22.7381	29.5054
1.07749	2.32164	3.75646	5.53027	7.66455	9.90814	13.1746	17.8665	22.8006	29.6014
1.07872	2.32164	3.75874	5.54943	7.68041	9.91436	13.1907	17.9159	22.8138	29.6186
1.07945	2.32164	3.76451	5.58926	7.68755	9.92036	13.1987	17.9283	22.8138	29.6217
1.08387	2.32164	3.76451	5.6118	7.69066	9.92036	13.2297	17.9648	22.8352	29.7626
1.08744	2.32916	3.77114	5.61195	7.69546	9.92036	13.2526	17.9665	22.8442	29.7865
1.08932	2.33465	3.77238	5.62312	7.70755	9.9404	13.2526	18.0126	22.938	29.7926
1.09014	2.33465	3.80241	5.62462	7.70788	9.95692	13.2663	18.0875	23.0305	29.7926
1.09023	2.33465	3.8204	5.63706	7.72358	9.95692	13.3376	18.1059	23.0325	29.8146
1.09241	2.33465	3.8204	5.66016	7.7275	9.96604	13.3604	18.1181	23.0441	29.8616
1.09277	2.33465	3.8204	5.66016	7.76493	9.97211	13.3708	18.1188	23.0463	29.8779
1.09587	2.33604	3.8204	5.66146	7.76911	9.98758	13.3731	18.1526	23.0541	29.9629
1.10056	2.3384	3.8204	5.6655	7.77049	9.99335	13.4079	18.1577	23.0882	29.98
1.10056	2.33998	3.8204	5.6655	7.77049	10.0387	13.4093	18.1768	23.1922	30.0441
1.10056	2.34188	3.82832	5.6655	7.77049	10.0417	13.4903	18.2259	23.2156	30.0537
1.10056	2.34291	3.84411	5.6655	7.77705	10.0728	13.4954	18.2469	23.2487	30.1814
1.10056	2.35034	3.84411	5.68152	7.77942	10.0928	13.4984	18.2498	23.2659	30.2293
1.10056	2.35799	3.84495	5.68152	7.78217	10.1168	13.5252	18.2707	23.279	30.2607
1.10056	2.36685	3.84922	5.68522	7.78217	10.1168	13.5419	18.2791	23.3177	30.3105
1.10056	2.36853	3.85198	5.69412	7.7898	10.1168	13.5419	18.2922	23.3374	30.3144
1.10056	2.36881	3.85198	5.69976	7.79368	10.1258	13.5441	18.3094	23.3594	30.328
1.10056	2.37893	3.85198	5.7081	7.83259	10.1345	13.5731	18.3253	23.3996	30.3344
1.10056	2.38297	3.85198	5.7081	7.83259	10.1352	13.5731	18.3253	23.4231	30.3382
1.10056	2.39316	3.88356	5.72399	7.83813	10.1377	13.5896	18.3462	23.4462	30.3505
1.10056	2.4086	3.88389	5.72657	7.83863	10.1646	13.6244	18.3913	23.4629	30.3903
1.10056	2.41876	3.88511	5.73984	7.83956	10.186	13.6398	18.411	23.4733	30.4246
1.10056	2.42004	3.89108	5.74512	7.84589	10.1973	13.701	18.4193	23.5531	30.4249
1.10056	2.42374	3.89108	5.74601	7.84675	10.2001	13.7108	18.4193	23.5993	30.457
1.10056	2.42374	3.89367	5.76616	7.85189	10.2055	13.7124	18.4291	23.6283	30.5257
1.10056	2.42374	3.90006	5.77359	7.86316	10.2358	13.7502	18.4291	23.6455	30.5296
1.10056	2.42374	3.92275	5.79007	7.8636	10.2358	13.7999	18.4473	23.6936	30.5319
1.10065	2.42542	3.93652	5.79236	7.87884	10.2361	13.8032	18.4587	23.6992	30.5939
1.10101	2.4323	3.94518	5.83403	7.88035	10.2447	13.8336	18.4636	23.7439	30.6473
1.105	2.43345	3.95122	5.83587	7.89037	10.2665	13.868	18.4996	23.8093	30.6862
1.10863	2.4362	3.95409	5.84958	7.90272	10.2757	13.871	18.5013	23.82	30.7154
1.10946	2.4362	3.95445	5.85263	7.90953	10.2801	13.8711	18.5029	23.8406	30.7256
1.11081	2.4362	3.95523	5.85332	7.92483	10.2877	13.8885	18.5652	23.8749	30.8043
1.11315	2.4362	3.956	5.85437	7.92483	10.3037	13.895	18.5849	23.8765	30.84
1.11586	2.43834	3.96814	5.86572	7.93079	10.3066	13.9004	18.6334	23.8825	30.9902
1.11669	2.44948	3.96814	5.87025	7.93628	10.3066	13.9105	18.6512	23.8863	31.0015
1.1188	2.45259	3.96814	5.87025	7.94391	10.3195	13.9407	18.6629	23.917	31.0071
1.12203	2.45344	3.96814	5.87754	7.97581	10.3359	13.9598	18.7096	23.9238	31.0439
1.13072	2.4589	3.97577	5.88995	7.98573	10.3422	13.9986	18.7165	23.9471	31.0471
1.13471	2.46094	3.97837	5.89329	8.01223	10.3476	14.0254	18.7916	23.949	31.1203
1.13987	2.46094	3.99825	5.9053	8.01223	10.3476	14.0295	18.8402	23.9634	31.1513
1.14267	2.46094	4.00218	5.90625	8.01601	10.3506	14.0364	18.8427	23.9825	31.1676
1.14636	2.46094	4.00415	5.9165	8.03488	10.3645	14.0446	18.8643	23.9997	31.244
1.15458	2.46094	4.00612	5.92672	8.03488	10.3737	14.0638	18.8695	24.0058	31.2772
1.16122	2.46094	4.00612	5.92672	8.04617	10.3856	14.0812	18.8825	24.0558	31.3029
1.16144	2.46094	4.00612	5.92672	8.06083	10.4409	14.0997	18.8959	24.0568	31.3385
1.16924	2.46094	4.00612	5.92867	8.06983	10.4438	14.122	18.9047	24.0682	31.3463
1.17059	2.46094	4.0275	5.95221	8.09259	10.464	14.122	18.9128	24.1064	31.3643
1.17223	2.46094	4.03624	5.95221	8.11	10.4785	14.1327	18.9508	24.1749	31.4183
1.17551	2.47321	4.03624	5.95221	8.11288	10.4867	14.1712	18.9812	24.2037	31.4391
1.18103	2.47321	4.03624	5.95221	8.12482	10.5126	14.1848	18.9812	24.2686	31.4426
1.18124	2.47321	4.04278	5.96375	8.15087	10.5131	14.2011	19.0401	24.3123	31.4471
1.18316	2.47321	4.05868	5.96925	8.15458	10.5706	14.2452	19.075	24.3205	31.4731
1.18437	2.47384	4.05868	5.9749	8.17247	10.5805	14.2586	19.1131	24.3247	31.5787
1.18452	2.47516	4.07358	5.98125	8.18054	10.5849	14.2596	19.1614	24.3347	31.5787
1.18766	2.48418	4.07717	5.99277	8.18054	10.5935	14.2715	19.1653	24.3459	31.6579
1.19224	2.50918	4.09223	5.99937	8.18054	10.6078	14.32	19.2095	24.3583	31.7623
1.19479	2.50967	4.09582	6.03306	8.18054	10.6078	14.3496	19.2221	24.3989	31.9023
1.19686	2.50967	4.09582	6.03599	8.18054	10.6277	14.3706	19.252	24.4241	31.9325
1.20765	2.50967	4.1149	6.04402	8.19163	10.633	14.3749	19.252	24.4399	31.9635
1.20909	2.50967	4.11514	6.05311	8.19163	10.6611	14.377	19.2647	24.4761	32.0281
1.21711	2.50967	4.12528	6.05311	8.19533	10.6846	14.377	19.2664	24.5169	32.0584
1.22364	2.50967	4.12528	6.0714	8.21246	10.6853	14.4023	19.2854	24.533	32.0584
1.22833	2.50967	4.12636	6.07484	8.21378	10.7032	14.4292	19.2952	24.5416	32.1819
1.22995	2.50967	4.13594	6.07807	8.21912	10.7298	14.438	19.296	24.5422	32.323
1.23014	2.50967	4.14236	6.07807	8.22483	10.7636	14.4502	19.296	24.5724	32.3659
1.23047	2.50967	4.14762	6.07807	8.22483	10.7639	14.4882	19.3054	24.5995	32.3686
1.23047	2.50967	4.15391	6.07807	8.22929	10.7817	14.6214	19.3227	24.6413	32.434
1.23047	2.50967	4.16815	6.092	8.25039	10.7821	14.6214	19.354	24.6745	32.4555
1.23047	2.50976	4.17527	6.09342	8.26305	10.7861	14.6278	19.3592	24.6843	32.5784
1.23047	2.51537	4.17635	6.12186	8.26511	10.8242	14.6338	19.365	24.7137	32.6674
1.23047	2.52167	4.18359	6.12699	8.27179	10.8309	14.6493	19.3906	24.7199	32.7252
1.23047	2.52252	4.18359	6.13316	8.27256	10.8644	14.7266	19.4309	24.7786	32.9055
1.23047	2.53312	4.18359	6.15234	8.27358	10.8728	14.7861	19.4346	24.7872	33.0728
1.23047	2.53369	4.18359	6.15234	8.30179	10.895	14.7984	19.4615	24.8262	33.2072
1.23047	2.53369	4.18359	6.15908	8.32072	10.8978	14.8066	19.4663	24.8299	33.24
1.23047	2.53369	4.18359	6.16153	8.32543	10.9017	14.8658	19.4803	24.8311	33.4307
1.23047	2.53369	4.18532	6.172	8.32728	10.9068	14.8983	19.4974	24.8473	33.7598
1.23047	2.53369	4.19083	6.172	8.32728	10.9228	14.9579	19.5326	24.9151	33.7838
1.23047	2.53369	4.19083	6.172	8.32753	10.9405	14.9602	19.54	24.9319	33.942
1.23047	2.53369	4.19083	6.1807	8.3302	10.975	14.9629	19.5985	24.9324	34.1015
1.23047	2.54002	4.19083	6.19648	8.33338	10.9777	15.0108	19.6135	24.9515	34.3268
1.23047	2.54317	4.19083	6.19648	8.34654	10.9891	15.0137	19.6151	24.954	34.3332
1.23047	2.55006	4.19629	6.19781	8.35091	11.0023	15.0641	19.6151	24.9651	34.3519
1.23047	2.55045	4.20317	6.21113	8.35095	11.0056	15.0714	19.6166	25.0119	34.4012
1.23047	2.5652	4.21245	6.21113	8.35505	11.0304	15.0842	19.629	25.0593	34.4385
1.23047	2.56929	4.21245	6.22573	8.36719	11.0523	15.1082	19.6839	25.0823	34.6661
1.23047	2.56929	4.21245	6.2306	8.38165	11.0542	15.1114	19.7013	25.0895	34.7129
1.23047	2.56929	4.21245	6.2306	8.38165	11.1081	15.1263	19.7152	25.1184	34.7381
1.23047	2.57909	4.22162	6.2306	8.39693	11.1087	15.1563	19.7152	25.1221	34.8029
1.23047	2.58064	4.23231	6.24359	8.39952	11.1206	15.1642	19.7443	25.151	34.848
1.23047	2.58441	4.23396	6.24369	8.3997	11.1206	15.1802	19.7765	25.2043	34.9834
1.23047	2.58789	4.23396	6.27031	8.4105	11.1206	15.2021	19.7831	25.2147	35.2202
1.23047	2.59142	4.24216	6.27418	8.41893	11.1225	15.2201	19.7868	25.2219	35.2256
1.23047	2.60302	4.24408	6.27418	8.42259	11.1424	15.2994	19.8117	25.2526	35.411
1.23047	2.60506	4.24686	6.27418	8.42489	11.1722	15.3073	19.8166	25.2723	35.4717
1.23047	2.61034	4.24824	6.27418	8.42489	11.2694	15.3232	19.826	25.2769	35.6536
1.23047	2.61601	4.24824	6.28071	8.42489	11.2908	15.3232	19.8301	25.2801	35.7889
1.23047	2.61601	4.24824	6.30308	8.42736	11.2935	15.3686	19.8361	25.313	36.2627
1.23047	2.61601	4.25592	6.31216	8.43482	11.308	15.4158	19.8654	25.3369	36.3853
1.23047	2.61601	4.26323	6.3277	8.45078	11.3123	15.4177	19.866	25.3668	36.9346
1.23047	2.61601	4.26336	6.32807	8.45106	11.3273	15.4326	19.9042	25.3715	36.996
1.23047	2.61601	4.29784	6.3499	8.46983	11.331	15.4472	19.9214	25.4347	37.183
1.23047	2.61601	4.29784	6.35094	8.47621	11.3364	15.4685	19.9286	25.4478	37.4053
1.23047	2.61601	4.29784	6.35294	8.49455	11.363	15.5059	19.9687	25.4573	37.504
1.23047	2.61601	4.30222	6.36543	8.49647	11.3704	15.5117	20.0088	25.4573	37.5202
1.23047	2.61601	4.30488	6.37388	8.49911	11.3715	15.5215	20.0321	25.51	37.6073
1.23047	2.62157	4.30488	6.3826	8.51128	11.379	15.5351	20.0487	25.5795	37.8577
1.23047	2.62365	4.30488	6.38422	8.53128	11.4003	15.5379	20.0548	25.6324	38.1953
1.23047	2.62821	4.30509	6.38422	8.53378	11.4395	15.5652	20.072	25.6378	38.1953
1.23047	2.65051	4.31009	6.39844	8.54268	11.4506	15.5682	20.0881	25.6812	39.2277
1.23047	2.65051	4.31427	6.39844	8.56038	11.4869	15.5935	20.1025	25.7283	39.7241
1.23047	2.65051	4.33794	6.39844	8.56836	11.4902	15.6342	20.1264	25.7283	39.9312
1.23047	2.65051	4.34895	6.39844	8.56977	11.5271	15.6516	20.1451	25.7565	40.1476
1.23047	2.65051	4.35379	6.40317	8.57099	11.5775	15.6748	20.1512	25.7738	40.236
1.23174	2.65051	4.35384	6.41429	8.58327	11.5904	15.7231	20.1727	25.7922	41.1161
1.23412	2.65051	4.35477	6.41734	8.58511	11.6082	15.7436	20.2225	25.8445	41.258
1.23574	2.66191	4.35833	6.41734	8.58619	11.6593	15.7577	20.2336	25.8445	42.1217
1.23717	2.66191	4.35869	6.41844	8.61328	11.6674	15.7577	20.2351	25.9743	42.4473
1.23986	2.66928	4.36079	6.41844	8.61328	11.6707	15.7714	20.2407	26.0743	42.5238
1.24421	2.68274	4.37324	6.42105	8.61328	11.6707	15.798	20.2486	26.1101	42.5433
1.24781	2.69127	4.37847	6.42243	8.6168	11.677	15.798	20.2516	26.1763	42.5755
1.24988	2.70142	4.38157	6.44089	8.62555	11.6992	15.8014	20.2725	26.1763	42.7042
1.25476	2.70703	4.38157	6.44089	8.62733	11.6992	15.8447	20.3113	26.2132	42.8648
1.25484	2.70703	4.39102	6.44089	8.62733	11.7405	15.8465	20.3604	26.2168	43.1585
1.25484	2.70703	4.39165	6.44089	8.6311	11.7534	15.8516	20.3902	26.2595	43.1634
1.25484	2.70703	4.39454	6.44091	8.64486	11.7766	15.8726	20.4094	26.3014	43.3276
1.25484	2.71819	4.39774	6.45922	8.65537	11.7784	15.8745	20.4184	26.3308	43.4678
1.25484	2.71819	4.40226	6.45967	8.66935	11.7953	15.8747	20.4184	26.3475	43.5422
1.25484	2.71819	4.42969	6.45967	8.67208	11.8125	15.8789	20.4381	26.3518	43.8466
1.25484	2.71819	4.43652	6.46462	8.68062	11.8262	15.9023	20.5544	26.4193	44.3133
1.25484	2.71819	4.43652	6.48696	8.70073	11.8381	15.905	20.5853	26.4193	44.5234
1.25484	2.71819	4.43652	6.48831	8.70073	11.8843	15.9582	20.6264	26.4287	44.6727
1.25484	2.71819	4.43652	6.50172	8.70598	11.8866	15.9677	20.6351	26.5424	45.0867
1.25484	2.72315	4.43652	6.50172	8.72571	11.8875	15.9787	20.6647	26.5438	45.2395
1.25484	2.72465	4.43652	6.50389	8.73893	11.9374	15.9837	20.6884	26.5448	45.6055
1.25484	2.73182	4.43652	6.51282	8.73893	11.9374	15.9961	20.7012	26.6191	46.0476
1.25484	2.73364	4.44247	6.51465	8.74351	11.9893	16.0048	20.7482	26.6509	46.0753
1.25484	2.73771	4.44763	6.52681	8.75298	12.0036	16.0716	20.8193	26.6805	46.1262
1.25484	2.74299	4.45315	6.53685	8.77502	12.0183	16.0775	20.8309	26.6929	46.1466
1.25484	2.74825	4.45695	6.54306	8.7972	12.0183	16.1156	20.8498	26.7439	46.8163
1.25484	2.74878	4.45695	6.54597	8.80452	12.0385	16.1569	20.9006	26.7573	47.8851
1.25484	2.74997	4.45695	6.55514	8.81139	12.0661	16.1927	20.9083	26.7779	49.1267
1.25484	2.75141	4.45695	6.56037	8.81252	12.0753	16.2496	20.9107	26.7881	50.5833
1.25484	2.75141	4.47981	6.56485	8.81451	12.0812	16.2943	20.9411	26.8305	52.1244
1.25484	2.75141	4.48191	6.5666	8.81855	12.0909	16.3333	20.946	26.8481	52.6114
1.25484	2.75141	4.49679	6.56818	8.8217	12.0941	16.3333	20.9989	26.8523	53.4783
1.25484	2.75141	4.49815	6.60339	8.87645	12.0987	16.3611	21.018	26.8619	53.573
1.25484	2.75141	4.50482	6.60339	8.88894	12.1062	16.3611	21.0263	26.9034	54.389
1.25484	2.7597	4.51768	6.60486	8.89008	12.1187	16.422	21.0622	26.9311	54.5352
1.25484	2.76069	4.51768	6.62367	8.89349	12.1412	16.422	21.0707	26.9447	54.8823
1.25484	2.76472	4.52438	6.62628	8.90601	12.205	16.422	21.1079	26.9612	54.9889
1.25592	2.78187	4.52438	6.62628	8.91389	12.2183	16.4392	21.1161	26.9743
1.27086	2.78423	4.52438	6.62628	8.91729	12.2183	16.4642	21.1667	26.9972
1.27088	2.78423	4.52438	6.64909	8.9572	12.2257	16.5176	21.1726	27.0445
1.27607	2.78555	4.53774	6.64909	8.95795	12.2301	16.5341	21.1833	27.0887
1.28968	2.79063	4.53774	6.64909	8.97631	12.248	16.5451	21.1998	27.1316
1.29103	2.7964	4.53774	6.66274	8.98797	12.248	16.5543	21.1998	27.2607
1.29255	2.80417	4.53774	6.66688	9.01187	12.2512	16.5762	21.2796	27.3651
1.2963	2.8056	4.57206	6.67122	9.01187	12.2871	16.5908	21.301	27.3961
1.30097	2.8059	4.57761	6.68542	9.02318	12.2939	16.5926	21.3042	27.4069
1.30346	2.8059	4.57761	6.68981	9.02352	12.2998	16.6364	21.3066	27.4074
1.3036	2.8059	4.58063	6.69447	9.0253	12.3047	16.6418	21.3237	27.4303
1.30512	2.8059	4.58688	6.69447	9.03032	12.3145	16.6418	21.3463	27.4414
1.30572	2.8059	4.58883	6.70111	9.03536	12.3342	16.677	21.3521	27.4559
1.31303	2.8059	4.59681	6.70686	9.07549	12.3477	16.7362	21.3691	27.4712
1.31571	2.8059	4.59741	6.71705	9.10547	12.3587	16.7416	21.3819	27.5044
1.31888	2.8059	4.59741	6.72156	9.10547	12.3587	16.7579	21.4158	27.5554
1.32526	2.8059	4.59741	6.72156	9.10547	12.3661	16.7617	21.4184	27.5644
1.32526	2.80733	4.59816	6.72178	9.10879	12.393	16.7668	21.4461	27.5807
1.32526	2.81802	4.61395	6.72576	9.11876	12.393	16.7723	21.461	27.6092
1.32526	2.82001	4.61664	6.728	9.11876	12.4005	16.7967	21.4629	27.6701
1.32526	2.82065	4.62368	6.73289	9.1281	12.4042	16.8102	21.4785	27.6732
1.32526	2.8214	4.62861	6.73363	9.13535	12.4105	16.8228	21.5547	27.6951
1.32526	2.82158	4.63087	6.74757	9.14199	12.4149	16.8336	21.5736	27.7115
1.32526	2.84348	4.63325	6.7575	9.14304	12.4442	16.8444	21.5848	27.7353
1.32526	2.84571	4.64329	6.7748	9.14529	12.4515	16.8691	21.6479	27.7662
1.32526	2.85727	4.65277	6.79441	9.14944	12.5024	16.8895	21.6744	27.8201
1.32526	2.85738	4.66039	6.80158	9.14985	12.5037	16.9228	21.7065	27.8423
1.32526	2.85908	4.67059	6.81555	9.15167	12.5069	16.9519	21.708	27.876
1.32526	2.86371	4.67578	6.83109	9.15522	12.5164	16.9519	21.7564	27.9122
1.32526	2.86593	4.68225	6.84211	9.15563	12.5315	16.9715	21.7915	27.965
1.32526	2.86669	4.68225	6.8618	9.22441	12.5342	16.9715	21.8464	28.0082
1.32526	2.86992	4.68225	6.86274	9.24736	12.5453	16.9745	21.8669	28.0736
1.32526	2.86992	4.68742	6.86421	9.24736	12.5484	17.009	21.8686	28.1186
1.32526	2.86992	4.69889	6.86581	9.26372	12.5604	17.0108	21.8833	28.1882
1.32526	2.87103	4.70161	6.87201	9.29415	12.569	17.027	21.8956	28.2326
1.32526	2.88045	4.70161	6.87236	9.30286	12.5701	17.05	21.9079	28.2435
1.32526	2.88045	4.70161	6.87974	9.30646	12.5975	17.0676	21.9507	28.2604
1.32526	2.88045	4.70863	6.89062	9.34313	12.6072	17.0854	21.9686	28.2839
1.32526	2.88045	4.72396	6.89502	9.37097	12.6156	17.1276	21.9686	28.2875
1.32526	2.88045	4.72731	6.89502	9.37097	12.6278	17.1365	22.0113	28.2954
1.32526	2.88331	4.72731	6.90818	9.37097	12.6557	17.1367	22.0182	28.3183
1.32526	2.88547	4.72731	6.90818	9.38091	12.7138	17.1405	22.025	28.3297
1.32526	2.88643	4.73031	6.92097	9.38414	12.7637	17.1691	22.0388	28.4277
1.32526	2.88794	4.73206	6.92706	9.38693	12.7637	17.1702	22.0879	28.4589
1.32526	2.90634	4.73371	6.93427	9.41932	12.7969	17.1832	22.0911	28.481
1.32526	2.91812	4.73371	6.93443	9.41932	12.7992	17.1914	22.1107	28.6875
1.32526	2.92987	4.75286	6.93443	9.42236	12.8011	17.1949	22.1238	28.6992
1.32858	2.93066	4.76865	6.96058	9.43217	12.8058	17.2072	22.1457	28.6992
1.33258	2.93303	4.77828	6.96058	9.45461	12.8091	17.2254	22.1457	28.7636
1.33273	2.93452	4.77828	6.96058	9.45461	12.8347	17.2424	22.1658	28.7944
1.33658	2.93546	4.77828	6.96493	9.46742	12.8347	17.2494	22.1698	28.8746
1.34313	2.94754	4.81405	6.96493	9.46742	12.8465	17.2897	22.1769	28.9105
1.34401	2.95076	4.81661	6.96493	9.46758	12.8465	17.3125	22.1974	28.9618
1.3467	2.95312	4.82051	6.96503	9.47061	12.8818	17.3408	22.2233	29.0151
1.34819	2.95312	4.82992	6.96928	9.50572	12.8841	17.379	22.2358	29.0159
1.3532	2.95312	4.83498	6.96928	9.50609	12.9871	17.3893	22.2535	29.0276
1.35377	2.95312	4.83498	6.97334	9.53582	13.0012	17.3893	22.2983	29.0893
1.35464	2.95819	4.84748	6.98764	9.55655	13.0324	17.4115	22.3379	29.0948
1.35716	2.96336	4.86637	6.9953	9.55655	13.043	17.4798	22.3458	29.139
1.35799	2.96336	4.87241	6.99963	9.55655	13.0777	17.4871	22.3512	29.2619
1.3617	2.96336	4.87635	7.00395	9.56145	13.0801	17.5159	22.3763	29.2976
1.36679	2.96336	4.8871	7.00395	9.56966	13.1263	17.5349	22.3783	29.31
1.36851	2.96336	4.89203	7.01216	9.57398	13.1263	17.551	22.3924	29.3108
1.36904	2.96336	4.89852	7.02777	9.61027	13.1634	17.557	22.4971	29.3338
1.37218	2.96336	4.89971	7.03845	9.648	13.1739	17.5873	22.5038	29.3513
1.37627	2.96336	4.90338	7.04705	9.648	13.1783	17.61	22.5557	29.4519
1.37701	2.96419	4.90386	7.04705	9.69497	13.1907	17.6176	22.5616	29.4592
1.38478	2.97356	4.91322	7.05135	9.69861	13.1907	17.6176	22.5649	29.4764
1.38846	2.97356	4.92188	7.06396	9.70931	13.2297	17.6176	22.5884	29.5497
1.39025	2.97356	4.93718	7.07999	9.71075	13.2297	17.6228	22.5884	29.5736
1.39212	2.97356	4.94642	7.08562	9.75103	13.2297	17.6434	22.6219	29.606
1.39212	2.97356	4.95254	7.09284	9.76034	13.2434	17.6794	22.6387	29.7427
1.39212	2.97356	4.95254	7.09843	9.79086	13.2526	17.6794	22.646	29.8139
1.39212	2.97356	4.95262	7.09843	9.7975	13.3018	17.6837	22.6682	29.8481
1.39212	2.97356	4.97694	7.10238	9.80059	13.3096	17.6999	22.6887	29.8545
1.39212	2.97356	4.97694	7.10269	9.80059	13.3149	17.7126	22.6967	29.8553
[truncated: 1,447 more rows]
