# Supplementary material for: Long-term intravital imaging of the multicolor-coded tumor microenvironment during combination immunotherapy
Source: eLife. 2016 Nov 18;5:e14756. doi: 10.7554/eLife.14756 (PMC5173323; doi:10.7554/eLife.14756)
Supplement: Figure 3—source data 2. — DOI: http://dx.doi.org/10.7554/eLife.14756.017 [file elife-14756-fig3-data2.xls]

## Sheet:  displacement(um)
0	0	0	0	0	0	0	0	0.0289493	0	0	0	0	0.0342935	0.0589111	0.0859303	0.0331423	0.0871125	0.0307263	0	0.0842514	0.0713437	0.0868385	0.0797994	0.0466574	0.0645119	0.0515921	0.116039	0.516016	0.565634
0	0	0	0	0	0	0.00527646	0	0.0320007	0.0375912	0.0176	0	0.0410093	0.0402253	0.0659194	0.0965216	0.0617997	0.147402	0.0947576	0	0.117962	0.116738	0.115882	0.0829424	0.0974685	0.0779816	0.264348	0.220436	0.557756	0.751336
0	0	0	0	0	0	0.0286561	0.0134638	0.0404448	0.0430708	0.0405868	0.0232379	0.0413772	0.0510477	0.070753	0.105853	0.156478	0.168625	0.142672	0	0.156023	0.118002	0.119866	0.146041	0.106438	0.112844	0.283519	0.418513	0.725683	0.836114
0	0	0	0	0.0225109	0	0.030492	0.0226947	0.0405868	0.0431851	0.0470615	0.0241385	0.051815	0.0675946	0.0863808	0.106484	0.167955	0.178958	0.144139	0	0.180826	0.123112	0.163409	0.17227	0.202968	0.238833	0.437696	0.578108	0.738281	0.887552
0	0	0	0	0.0274985	0.0172077	0.0342017	0.0354589	0.0408562	0.0509736	0.0509471	0.0264654	0.0644319	0.0760228	0.0872305	0.131794	0.195915	0.203752	0.166783	0.0938526	0.180867	0.151064	0.199817	0.187406	0.213402	0.278758	0.47568	0.588051	0.745173	0.892645
0	0	0	0	0.0275141	0.023192	0.0354136	0.0432257	0.045544	0.0519435	0.0545099	0.0381953	0.0688961	0.0904602	0.0916442	0.15126	0.206639	0.207947	0.184999	0.13019	0.197781	0.198439	0.273408	0.276231	0.280032	0.3223	0.565985	0.694995	0.793256	1.21228
0	0	0	0	0.0304175	0.0285701	0.0425292	0.0452026	0.0493215	0.0572512	0.0624352	0.0508577	0.0748615	0.0987546	0.0926292	0.159928	0.211781	0.223718	0.191919	0.148194	0.200863	0.203476	0.275087	0.320851	0.311345	0.366028	0.580513	0.725117	0.814152	1.23047
0	0	0	0	0.036328	0.0322392	0.0426602	0.0546933	0.0562803	0.0610408	0.0625414	0.0520482	0.0798869	0.107047	0.105189	0.180039	0.214399	0.2283	0.219674	0.153108	0.203328	0.212858	0.283894	0.34061	0.335119	0.375941	0.584121	0.859182	0.829014	1.34093
0	0	0	0	0.0460644	0.0346916	0.0460868	0.0553641	0.0635794	0.0655739	0.0643789	0.0659789	0.0856927	0.107555	0.116249	0.192471	0.2327	0.231855	0.238646	0.202106	0.222749	0.236552	0.290766	0.355194	0.338653	0.403963	0.622149	0.861911	0.837454	1.49257
0	0	0	0	0.0522515	0.0409647	0.04647	0.0643944	0.0652459	0.0665046	0.0644964	0.0675975	0.0875833	0.109008	0.149223	0.198864	0.234379	0.234908	0.247954	0.239842	0.229611	0.3187	0.318095	0.383105	0.473136	0.40821	0.67442	0.867102	0.85272	1.62901
0	0	0	0.00738486	0.0533632	0.0426602	0.0546113	0.0671218	0.0725519	0.0721812	0.0658793	0.0739823	0.0892486	0.109063	0.149827	0.200559	0.240321	0.248999	0.250032	0.263857	0.277574	0.343339	0.337774	0.440685	0.505893	0.606387	0.713871	0.872621	0.91919	1.74149
0	0	0	0.0221002	0.0582298	0.0452534	0.0612528	0.0697078	0.073706	0.0757649	0.0740188	0.07964	0.0909072	0.110375	0.170293	0.202834	0.246094	0.254766	0.262434	0.266511	0.308482	0.36649	0.373905	0.448371	0.58223	0.621726	0.811612	0.903164	0.977552	1.75396
0	0	0	0.0227277	0.0645481	0.0453434	0.0635781	0.0737739	0.0756298	0.0868919	0.0758497	0.0802447	0.0956799	0.126256	0.171248	0.206157	0.246094	0.267043	0.26315	0.267818	0.346389	0.376839	0.380121	0.460811	0.595225	0.706004	0.84654	0.966512	0.978426	1.81112
0	0	0	0.0232806	0.0669242	0.0508443	0.0680893	0.0787817	0.0808441	0.0871361	0.0764447	0.0857108	0.103988	0.131168	0.178355	0.206354	0.247055	0.267978	0.286781	0.272568	0.347353	0.380941	0.396694	0.515432	0.608042	0.722564	0.879628	0.97133	1.11548	1.93749
0	0	0	0.0245954	0.0688581	0.0552006	0.0687541	0.0820132	0.0830363	0.0898061	0.0822787	0.0880884	0.110064	0.139615	0.181901	0.206422	0.258823	0.270382	0.298305	0.302255	0.34942	0.382441	0.430022	0.545627	0.640099	0.740509	0.9053	0.980871	1.42145	2.2715
0	0	0	0.0307617	0.0698253	0.0566341	0.0723888	0.085432	0.0857297	0.0903724	0.093704	0.0901048	0.115898	0.142568	0.185829	0.206639	0.259624	0.276108	0.298868	0.30929	0.358608	0.397125	0.470343	0.555305	0.672366	0.79011	0.974064	1.05474	1.49203	2.48159
0	0	0	0.0309262	0.0708983	0.0576213	0.0729917	0.08678	0.0885282	0.0967844	0.0950121	0.0946233	0.124046	0.144748	0.205467	0.209972	0.264205	0.277751	0.299965	0.314263	0.414901	0.398809	0.488175	0.592506	0.725614	0.801135	0.998652	1.08989	1.49693	2.57671
0	0	0.0115093	0.0326668	0.0748799	0.0577672	0.0742416	0.0891142	0.0943169	0.100918	0.0974752	0.0964217	0.124798	0.155186	0.206354	0.210083	0.273075	0.278936	0.300264	0.336469	0.431589	0.421516	0.492128	0.595952	0.737538	0.832028	1.00257	1.11974	1.49713	2.71731
0	0	0.0124575	0.0336692	0.075112	0.0602961	0.0767009	0.0949255	0.0949237	0.116741	0.101038	0.0972567	0.127769	0.160416	0.206606	0.225883	0.274676	0.279203	0.31749	0.365403	0.446348	0.434594	0.528399	0.622077	0.753259	0.850871	1.01087	1.25761	1.52317	3.45171
0	0	0.0147921	0.0352254	0.0754032	0.0641546	0.0775627	0.0953534	0.0953534	0.118178	0.107918	0.0998742	0.129411	0.162435	0.206639	0.229003	0.276081	0.289995	0.333532	0.374832	0.451342	0.448631	0.531081	0.631547	0.756008	0.887407	1.02136	1.35695	1.55227	3.7207
0	0	0.0181482	0.0378675	0.077017	0.0648924	0.0812879	0.0965882	0.0965191	0.12033	0.108219	0.108453	0.131018	0.164274	0.20829	0.232688	0.276466	0.296463	0.34458	0.381147	0.472416	0.45506	0.536272	0.661608	0.76037	0.948828	1.02166	1.35844	1.59241	3.88286
0	0	0.0184357	0.0383427	0.0782351	0.065005	0.0837316	0.0970466	0.103565	0.122425	0.110039	0.108898	0.131994	0.173011	0.216656	0.237676	0.27839	0.29798	0.359729	0.385848	0.487912	0.506226	0.539487	0.663122	0.828467	0.98622	1.10404	1.3814	1.64225	3.92197
0	0	0.0214618	0.0389451	0.0801145	0.0677841	0.0840565	0.0979108	0.104901	0.123635	0.115892	0.118556	0.13314	0.174777	0.220875	0.242149	0.279134	0.300639	0.361179	0.38861	0.491812	0.522643	0.543766	0.668975	0.853467	1.01592	1.10826	1.40584	1.72272	4.00895
0	0	0.0283558	0.0390111	0.0811558	0.0680756	0.0852787	0.101676	0.106784	0.130636	0.11591	0.124993	0.142264	0.175743	0.221742	0.246094	0.287377	0.308654	0.372213	0.389678	0.502671	0.52756	0.552815	0.709721	0.858359	1.02928	1.11021	1.43245	1.76465	4.22544
0	0	0.0284103	0.0397738	0.0813511	0.0723888	0.0877014	0.102675	0.109371	0.131699	0.116149	0.133659	0.142956	0.180329	0.229376	0.251872	0.288177	0.310208	0.373398	0.424136	0.503153	0.542997	0.585323	0.749311	0.899356	1.04631	1.11177	1.43856	1.89884	4.44138
0	0	0.0296849	0.0597258	0.0817247	0.0769587	0.0925753	0.104468	0.110091	0.136065	0.119565	0.1365	0.146028	0.183335	0.232912	0.252874	0.289735	0.319963	0.37982	0.429022	0.5038	0.551188	0.60286	0.7638	0.906235	1.06588	1.1527	1.44034	1.95908	4.60605
0	0	0.0307617	0.0601009	0.0832081	0.0782351	0.0992513	0.109592	0.111405	0.136182	0.122719	0.144993	0.15391	0.188837	0.235107	0.26635	0.289859	0.329086	0.390723	0.431368	0.51273	0.553129	0.628557	0.784604	0.91925	1.10956	1.18818	1.55297	2.08229	5.07335
0	0	0.031927	0.0609272	0.0838029	0.0791703	0.0996851	0.112219	0.119051	0.139736	0.123238	0.145513	0.165063	0.191061	0.23532	0.27605	0.300437	0.329649	0.399736	0.4369	0.516919	0.565607	0.633068	0.788665	0.923426	1.11248	1.22793	1.58559	2.08869	5.09327
0	0	0.0330911	0.0616473	0.0843464	0.0823643	0.101303	0.11459	0.120075	0.143444	0.123441	0.148796	0.166165	0.195521	0.242324	0.276618	0.308653	0.333149	0.40659	0.439917	0.536102	0.569334	0.641174	0.811802	0.940263	1.13807	1.27563	1.59542	2.15668	5.20553
0	0	0.0341142	0.0658102	0.0847225	0.084785	0.101847	0.118252	0.12161	0.144884	0.126155	0.149442	0.168166	0.195537	0.244471	0.277626	0.318743	0.337397	0.413423	0.468836	0.537833	0.582786	0.645774	0.833364	0.940346	1.14521	1.28009	1.62143	2.17827	5.2092
0	0	0.0350098	0.0670206	0.0849174	0.0870073	0.102675	0.118808	0.124196	0.144884	0.127005	0.149582	0.170441	0.198229	0.244826	0.27839	0.321084	0.340299	0.415509	0.483935	0.567875	0.583687	0.654771	0.841128	0.953056	1.14571	1.28081	1.7104	2.30637	5.31408
0	0	0.0391784	0.0683846	0.086992	0.0884481	0.102913	0.120325	0.130487	0.149873	0.129243	0.149818	0.173422	0.199365	0.246094	0.280201	0.324473	0.346305	0.439081	0.489004	0.576195	0.59556	0.660756	0.841201	0.954483	1.14646	1.28852	1.72086	2.31973	5.38197
0	0.0111179	0.0395151	0.0707023	0.0894357	0.089065	0.106806	0.120929	0.135748	0.157649	0.130347	0.153579	0.174215	0.201399	0.25786	0.295305	0.326018	0.351078	0.444851	0.497796	0.577365	0.59971	0.673328	0.864694	0.981565	1.17767	1.33517	1.73866	2.43983	5.43048
0	0.012669	0.0404764	0.0715035	0.0896352	0.0891398	0.110074	0.121545	0.137797	0.158971	0.134532	0.157512	0.175462	0.211644	0.261269	0.295531	0.327465	0.367843	0.444988	0.501582	0.59053	0.602176	0.701821	0.868148	0.997984	1.18808	1.33906	1.79159	2.52531	5.60021
0	0.0141712	0.0414975	0.0738285	0.0919235	0.0926367	0.112625	0.122856	0.143913	0.162564	0.136099	0.160209	0.181172	0.214889	0.268329	0.298053	0.327496	0.368398	0.449099	0.50963	0.590924	0.625047	0.704726	0.877542	1.00512	1.19491	1.39189	1.90518	2.54767	5.6129
0	0.0144443	0.0434305	0.0738717	0.0926795	0.092827	0.114363	0.124956	0.145457	0.165253	0.141958	0.163948	0.181833	0.218172	0.268915	0.308258	0.330349	0.381108	0.453071	0.533844	0.622766	0.63114	0.713004	0.890372	1.01685	1.22925	1.54952	1.91352	2.5538	6.15234
0	0.0160268	0.0437359	0.0741511	0.0930652	0.0928307	0.114629	0.12517	0.145765	0.167728	0.1456	0.164775	0.183617	0.224468	0.26981	0.312851	0.337028	0.38131	0.453374	0.54381	0.6231	0.647593	0.732408	0.900606	1.02666	1.24806	1.5523	1.93551	2.94576	6.2698
0	0.016121	0.0448054	0.0744608	0.0938973	0.0938973	0.11467	0.128189	0.14624	0.168057	0.146202	0.166675	0.191133	0.230886	0.270402	0.316063	0.337383	0.38212	0.459657	0.544485	0.629224	0.674235	0.732664	0.908937	1.08191	1.25049	1.56687	1.98935	3.26189	6.27418
0	0.0206018	0.0451401	0.0748799	0.0946282	0.094824	0.116878	0.130011	0.146441	0.168341	0.148287	0.168293	0.191591	0.235489	0.273189	0.318536	0.343546	0.384893	0.467456	0.545319	0.638117	0.720042	0.74065	0.911707	1.08239	1.25473	1.57707	2.01437	3.28697	6.3998
0	0.0231593	0.0456711	0.0750743	0.0951209	0.0960727	0.119603	0.132275	0.148312	0.169224	0.148555	0.170277	0.194217	0.236219	0.274774	0.322221	0.348029	0.391805	0.493623	0.557147	0.639407	0.722711	0.759381	0.920722	1.09225	1.25929	1.58295	2.12396	3.44988	6.96058
0	0.0237748	0.0487939	0.0761338	0.0959628	0.0973564	0.119921	0.133261	0.153007	0.171561	0.150682	0.170808	0.195636	0.237465	0.286491	0.323747	0.350869	0.394769	0.501991	0.573125	0.657655	0.722848	0.766381	0.932962	1.1229	1.2602	1.5896	2.13144	3.45485	7.01593
0	0.0238963	0.0501708	0.076221	0.0962898	0.098272	0.12003	0.133384	0.153493	0.172847	0.151055	0.17161	0.197206	0.245663	0.292237	0.324855	0.35207	0.399335	0.502175	0.576935	0.67243	0.729705	0.821967	0.954608	1.13464	1.26649	1.61826	2.27289	3.47266	7.12332
0	0.024557	0.0505104	0.0799873	0.0964122	0.10011	0.122448	0.134401	0.15422	0.175749	0.157133	0.17343	0.198031	0.250851	0.294846	0.327662	0.357074	0.403133	0.51719	0.59299	0.679006	0.732546	0.841964	0.961588	1.14094	1.27809	1.62843	2.31125	3.52706	7.33912
0	0.0245786	0.0522138	0.0810292	0.100013	0.102145	0.126399	0.134539	0.158219	0.179824	0.158097	0.174014	0.198878	0.254907	0.296276	0.335687	0.362578	0.409231	0.528616	0.594932	0.689895	0.742709	0.843911	1.01627	1.2011	1.29595	1.65737	2.32818	3.63353	7.80371
0	0.0251046	0.0535473	0.0814793	0.100418	0.104731	0.126464	0.137202	0.159208	0.181878	0.165253	0.179107	0.211977	0.255571	0.300931	0.335778	0.363937	0.416925	0.529545	0.595358	0.699026	0.760998	0.847371	1.01997	1.23659	1.35378	1.66314	2.40019	3.68748	8.70073
0	0.0263082	0.0539115	0.0833039	0.100664	0.10587	0.126774	0.13742	0.160197	0.185121	0.170063	0.180139	0.216348	0.268817	0.305409	0.339759	0.366843	0.419755	0.532909	0.598563	0.706284	0.771381	0.870885	1.04915	1.24419	1.35792	1.7758	2.40763	3.7207	8.74416
0	0.0264391	0.0541459	0.0838029	0.101109	0.1067	0.127345	0.137798	0.16218	0.190326	0.170141	0.181025	0.226297	0.269671	0.310439	0.340521	0.369366	0.422458	0.536913	0.607408	0.717411	0.775958	0.913315	1.05255	1.24926	1.36128	1.86354	2.41104	4.04279	8.87304
0	0.0264682	0.0549551	0.0862784	0.102348	0.108139	0.131294	0.139355	0.165062	0.190629	0.171273	0.181466	0.228552	0.271859	0.311822	0.341237	0.374259	0.422891	0.537871	0.609111	0.726406	0.77648	0.923179	1.09556	1.24944	1.46109	1.89127	2.414	4.11539	9.0174
0	0.027644	0.0551361	0.0869566	0.104261	0.108251	0.131357	0.139567	0.165176	0.191807	0.17333	0.191039	0.230886	0.279929	0.313512	0.342179	0.374302	0.423356	0.54464	0.609846	0.726946	0.798803	0.930801	1.11358	1.2599	1.48804	2.00635	2.46696	4.13267	9.09438
0	0.0277435	0.0569276	0.0869945	0.104471	0.109719	0.132312	0.139698	0.165397	0.192667	0.178151	0.191133	0.233097	0.28737	0.315026	0.345831	0.374435	0.433029	0.550679	0.612426	0.732798	0.816102	0.937178	1.11885	1.26862	1.49026	2.01095	2.51363	4.22845	9.81556
0	0.0278402	0.0574497	0.0871829	0.105218	0.110008	0.132482	0.141594	0.165937	0.192863	0.184017	0.194175	0.23408	0.293865	0.31516	0.347434	0.377469	0.44711	0.555336	0.658909	0.747255	0.821208	0.948832	1.13476	1.27022	1.5164	2.07412	2.66191	4.33195	9.89964
0	0.0279316	0.0574961	0.0872174	0.105618	0.111201	0.133753	0.143741	0.166818	0.192938	0.185121	0.195773	0.23412	0.296042	0.31811	0.355195	0.377989	0.458915	0.556122	0.658931	0.747978	0.828213	0.966332	1.13722	1.27306	1.55687	2.11481	2.66535	4.54548	10.1962
0	0.0279536	0.0589564	0.0881	0.106117	0.111648	0.136912	0.144314	0.167366	0.194004	0.191011	0.19993	0.239203	0.303442	0.319799	0.358457	0.380951	0.45963	0.55922	0.672164	0.770022	0.830901	0.994077	1.15207	1.27912	1.57199	2.11877	2.67155	4.55691	10.6276
0	0.0291424	0.0589759	0.0884843	0.107361	0.112823	0.1377	0.148338	0.170967	0.196348	0.191056	0.20572	0.24206	0.305634	0.32342	0.359192	0.384939	0.460048	0.561948	0.680787	0.77322	0.839688	0.998722	1.18993	1.28271	1.60301	2.12393	2.79846	4.63538	10.8771
0	0.0296247	0.0591246	0.0906868	0.1075	0.112869	0.138482	0.151467	0.172209	0.197552	0.191496	0.20635	0.251893	0.308066	0.324583	0.367778	0.387625	0.46213	0.56798	0.698022	0.813216	0.841078	1.01051	1.19023	1.346	1.68131	2.13222	2.8059	4.63588	10.9047
0	0.0303351	0.059348	0.0908669	0.111486	0.116102	0.14125	0.155484	0.173947	0.200348	0.192863	0.208097	0.254799	0.31009	0.337799	0.369795	0.38812	0.462434	0.572925	0.722549	0.813724	0.856442	1.02033	1.1968	1.35026	1.75356	2.2305	2.95312	4.63838	10.987
0	0.0337847	0.0599197	0.0929453	0.113486	0.117493	0.14276	0.160138	0.175001	0.203082	0.194915	0.211261	0.258956	0.311706	0.338035	0.369904	0.390064	0.467778	0.575083	0.735697	0.816033	0.892079	1.06009	1.2056	1.40374	1.77932	2.23901	2.99177	4.6693	11.5834
0	0.0340001	0.0607464	0.0939364	0.113568	0.117871	0.142779	0.160498	0.175558	0.203349	0.200689	0.211497	0.25938	0.313862	0.338494	0.376156	0.39086	0.467873	0.575707	0.746738	0.818461	0.906236	1.06117	1.21913	1.41035	1.79685	2.25671	3.0405	4.68606	11.5912
0	0.0343343	0.0617697	0.0949486	0.113825	0.119163	0.143805	0.161048	0.177424	0.20633	0.202325	0.21234	0.261155	0.315088	0.342566	0.376869	0.39503	0.469009	0.578262	0.767361	0.825864	0.90736	1.07209	1.22697	1.42047	1.80679	2.29239	3.08355	4.71634	11.906
0	0.0345902	0.0621509	0.0957283	0.11391	0.11919	0.144247	0.161484	0.179935	0.208007	0.202536	0.214435	0.261783	0.315143	0.346135	0.378707	0.398202	0.473984	0.593123	0.772489	0.844677	0.912712	1.07492	1.25427	1.46383	1.86425	2.2997	3.13494	4.76371	12.175
0	0.0353838	0.0625061	0.0959359	0.114589	0.119585	0.144579	0.163775	0.183109	0.208524	0.206408	0.215537	0.261863	0.316765	0.34742	0.38012	0.400047	0.492188	0.598283	0.775904	0.869865	0.963698	1.08009	1.25556	1.47063	1.88369	2.34133	3.15239	4.83615	12.3047
0	0.0360149	0.0632012	0.0960688	0.115185	0.121895	0.146092	0.165062	0.185782	0.209244	0.207396	0.216907	0.264465	0.318134	0.350948	0.382441	0.40273	0.495839	0.607236	0.796939	0.906461	0.979258	1.12171	1.26585	1.50405	1.90865	2.3779	3.22461	4.87527	12.6685
0	0.0379436	0.0640735	0.0961703	0.116909	0.123858	0.146809	0.167258	0.187735	0.209722	0.209332	0.21815	0.264538	0.319877	0.353073	0.386592	0.404929	0.496932	0.608468	0.81321	0.907575	0.996704	1.13094	1.27505	1.50601	1.91204	2.4423	3.26151	4.91795	13.4627
0	0.0385924	0.0652043	0.0968642	0.117147	0.127708	0.147339	0.167563	0.191496	0.211176	0.210387	0.218183	0.265379	0.320815	0.355351	0.38772	0.413248	0.500519	0.60915	0.816112	0.914388	1.0015	1.14435	1.30015	1.53075	1.96128	2.49323	3.26557	4.9697	13.5352
0	0.0392984	0.0653203	0.0989518	0.120484	0.128012	0.149014	0.170045	0.192112	0.211268	0.212155	0.219115	0.265742	0.321823	0.3579	0.389968	0.415301	0.503729	0.615234	0.830336	0.925467	1.00796	1.16261	1.37503	1.55976	2.04591	2.49928	3.34724	5.04636	14.0295
0	0.0398812	0.0662162	0.0991161	0.122491	0.130784	0.149527	0.170407	0.192186	0.211888	0.214116	0.222954	0.267708	0.324409	0.361152	0.390931	0.424424	0.513416	0.61635	0.830686	0.931007	1.01241	1.19231	1.37659	1.57071	2.06816	2.52864	3.47266	5.07085	14.3496
0	0.0405877	0.0668862	0.0992619	0.123173	0.132228	0.150054	0.172257	0.192357	0.212648	0.216836	0.22816	0.268328	0.324808	0.361935	0.392371	0.42649	0.517549	0.61876	0.835599	0.933859	1.01481	1.20876	1.38698	1.5797	2.07077	2.65051	3.4815	5.15361	15.1353
0	0.0413192	0.0679889	0.100345	0.125059	0.133184	0.150279	0.172336	0.194637	0.214968	0.221688	0.229704	0.268385	0.325029	0.364	0.394624	0.428512	0.52035	0.626006	0.837655	0.946712	1.03618	1.23378	1.38705	1.67001	2.09555	2.69568	3.55149	5.29052	15.8654
0	0.0415434	0.0687311	0.101923	0.125462	0.133794	0.150672	0.17442	0.195244	0.218462	0.222954	0.230692	0.268694	0.326952	0.365681	0.395827	0.433231	0.522544	0.626625	0.847354	0.955517	1.06189	1.23609	1.39342	1.72565	2.09662	2.71187	3.55767	5.45989	16.3197
0	0.0428511	0.069354	0.102839	0.125598	0.134222	0.152232	0.176796	0.200914	0.219712	0.223813	0.230886	0.270892	0.327754	0.369688	0.400645	0.435234	0.527104	0.627876	0.852809	0.961303	1.0753	1.24195	1.42856	1.7872	2.0986	2.75141	3.76248	5.57933	16.3702
0	0.0430131	0.0701475	0.103355	0.125728	0.138082	0.152232	0.178436	0.20106	0.220731	0.229704	0.231269	0.270945	0.329131	0.369904	0.401693	0.435425	0.527536	0.632262	0.857881	0.969109	1.07938	1.255	1.4301	1.79882	2.22961	2.7649	3.79957	5.85611	16.6162
0	0.0434592	0.0713278	0.103413	0.126239	0.138171	0.15282	0.180199	0.20259	0.221177	0.229772	0.237895	0.271858	0.330314	0.370461	0.406211	0.43983	0.527919	0.633679	0.867979	0.982384	1.11397	1.27529	1.43573	1.82471	2.26282	2.86763	3.8217	6.19499	18.5727
0	0.0444767	0.0720422	0.103964	0.12628	0.142567	0.154007	0.181059	0.203049	0.223285	0.231836	0.240317	0.271859	0.33203	0.371729	0.409502	0.448728	0.530435	0.633695	0.869928	1.01439	1.12298	1.30253	1.46247	1.83577	2.28982	2.90297	3.85936	6.21824	18.7419
0	0.0452178	0.0724273	0.104075	0.127631	0.143089	0.155235	0.181209	0.203628	0.225443	0.232078	0.240536	0.273628	0.332063	0.372872	0.411421	0.449398	0.533879	0.638149	0.886876	1.01512	1.14396	1.30855	1.51103	1.85861	2.30368	2.90331	3.87206	6.2306	18.9719
0	0.0455333	0.0725594	0.106003	0.12778	0.143333	0.156811	0.181378	0.203841	0.22763	0.234936	0.242783	0.275324	0.333337	0.376498	0.411532	0.451873	0.534644	0.641248	0.888047	1.03298	1.18755	1.35253	1.51603	1.85876	2.39137	2.97656	3.92538	6.32112	18.9892
0	0.0461562	0.073525	0.106633	0.128174	0.14357	0.157392	0.182397	0.204465	0.22839	0.235043	0.24301	0.276932	0.335238	0.377054	0.417722	0.461234	0.535898	0.647557	0.895964	1.03954	1.19154	1.36058	1.51609	1.88029	2.40863	3.04122	3.93496	6.38096	19.2205
0	0.0462311	0.0739751	0.107457	0.129953	0.146206	0.160623	0.182859	0.205815	0.229835	0.240579	0.244273	0.283914	0.335778	0.377083	0.418066	0.461317	0.538621	0.648758	0.897928	1.05302	1.21321	1.36983	1.55173	1.88962	2.40971	3.07677	4.04558	6.41734	19.4554
0	0.0463663	0.0749557	0.107915	0.130075	0.146606	0.160645	0.185898	0.208788	0.230769	0.241148	0.244642	0.284801	0.338263	0.37929	0.428512	0.46146	0.547133	0.663658	0.908098	1.08705	1.23397	1.39213	1.59443	1.96788	2.41719	3.14145	4.07434	6.52412	20.0151
0	0.0466492	0.0750876	0.10794	0.130244	0.146608	0.160924	0.188342	0.209657	0.231178	0.242413	0.246094	0.286749	0.339078	0.379498	0.428622	0.466232	0.550282	0.665127	0.913463	1.09262	1.24657	1.41078	1.6173	1.97093	2.44192	3.18129	4.07642	6.6927	20.1381
0	0.0474951	0.0753164	0.110157	0.130489	0.146653	0.161836	0.18897	0.209722	0.232415	0.242824	0.246094	0.287883	0.340932	0.385001	0.430776	0.467608	0.550282	0.666527	0.918433	1.10177	1.26875	1.4751	1.63181	1.97207	2.45815	3.22461	4.09089	6.80662	20.2934
0	0.0483754	0.0755874	0.111431	0.130961	0.147204	0.163247	0.19506	0.210432	0.233065	0.245391	0.246094	0.291771	0.342314	0.387668	0.437365	0.47651	0.550366	0.678776	0.925528	1.11905	1.31613	1.48475	1.64118	2.024	2.56929	3.23414	4.18975	6.86148	20.4791
0	0.049271	0.0773754	0.113699	0.1327	0.147465	0.163529	0.195406	0.210912	0.233875	0.246094	0.246646	0.291995	0.342399	0.388412	0.437455	0.480702	0.55922	0.692551	0.929205	1.12733	1.31909	1.48682	1.65612	2.0422	2.57276	3.26255	4.20966	6.87638	20.537
0	0.0493972	0.0776133	0.114646	0.132792	0.148584	0.163842	0.196235	0.211793	0.234607	0.249872	0.25361	0.293186	0.345867	0.388469	0.437754	0.485927	0.560424	0.694041	0.93124	1.12891	1.32242	1.49685	1.65687	2.06501	2.60236	3.27305	4.21913	6.94667	20.5418
0	0.0496281	0.0780045	0.11641	0.133279	0.148889	0.163892	0.199952	0.212127	0.234924	0.250755	0.254799	0.296463	0.346234	0.389046	0.446128	0.492188	0.573451	0.697604	0.934231	1.14113	1.35166	1.51265	1.68557	2.10786	2.62855	3.28687	4.3949	7.22735	22.587
0	0.0497951	0.0790337	0.11805	0.133424	0.150079	0.164027	0.200694	0.212576	0.235355	0.253976	0.257737	0.298307	0.34742	0.390178	0.449068	0.492188	0.573691	0.705572	0.936005	1.16157	1.3661	1.5176	1.74848	2.14068	2.67781	3.29568	4.46439	7.6295	23.2164
0	0.0501641	0.0802274	0.118436	0.133796	0.151679	0.164133	0.204635	0.213317	0.235376	0.254702	0.262083	0.303535	0.347814	0.398503	0.45164	0.498957	0.577323	0.720681	0.941128	1.16184	1.39082	1.52344	1.76748	2.17928	2.68165	3.38918	4.52643	7.66455	23.7225
0	0.0505405	0.0813013	0.118746	0.134214	0.152184	0.166092	0.207278	0.216406	0.236252	0.257126	0.262677	0.304623	0.348029	0.401214	0.45275	0.502239	0.582207	0.724108	0.941931	1.20329	1.3936	1.52906	1.82237	2.21299	2.75141	3.39467	4.55475	7.69708	24.2026
0	0.0511689	0.0814336	0.119383	0.134602	0.152232	0.166211	0.209196	0.218061	0.236263	0.257466	0.264698	0.306792	0.350218	0.401292	0.453516	0.502367	0.584842	0.731435	0.99279	1.20402	1.4292	1.57208	1.89592	2.28007	2.82479	3.39635	4.57315	8.16713	26.0732
0	0.051362	0.0825483	0.120239	0.136576	0.153773	0.166655	0.210315	0.22039	0.240383	0.258332	0.267708	0.309791	0.350254	0.402757	0.465167	0.507562	0.587527	0.738281	1.00767	1.21065	1.45481	1.60409	1.89748	2.31655	2.83767	3.44598	4.58366	8.30149	26.3093
0	0.0516703	0.0828339	0.120331	0.136586	0.154512	0.168341	0.212329	0.220403	0.24074	0.259644	0.26927	0.310593	0.354207	0.405929	0.467961	0.513376	0.589395	0.743855	1.00928	1.25484	1.45775	1.60441	1.93334	2.40011	2.86655	3.49765	4.60156	8.4177	26.3499
0	0.0518401	0.0830581	0.120667	0.137226	0.154527	0.169132	0.212888	0.220917	0.24075	0.261653	0.271094	0.310989	0.359858	0.406211	0.473326	0.513658	0.59245	0.746117	1.05695	1.27976	1.46313	1.61424	1.93469	2.40726	2.89251	3.55858	4.62947	8.42606	26.5622
0	0.0520327	0.0831492	0.120928	0.137642	0.155671	0.169601	0.213027	0.224402	0.241474	0.262662	0.274697	0.321237	0.360758	0.40746	0.474459	0.514838	0.593456	0.746857	1.05737	1.28998	1.46436	1.65421	1.94219	2.41133	2.90812	3.55902	4.63877	8.53204	26.6669
0	0.0532123	0.0837181	0.121425	0.137901	0.156198	0.169619	0.213114	0.224917	0.243535	0.272841	0.275613	0.323453	0.361467	0.420087	0.476134	0.516101	0.594106	0.750499	1.07823	1.30841	1.46662	1.69348	1.96797	2.4287	2.95845	3.58349	4.67825	8.60269	27.3758
0	0.0541374	0.083856	0.12172	0.137946	0.157909	0.171693	0.214628	0.225988	0.243647	0.276803	0.276442	0.324516	0.363631	0.420469	0.480739	0.5162	0.599096	0.778149	1.10246	1.3427	1.46742	1.69418	1.99772	2.45162	2.97356	3.58819	4.75271	8.90651	28.071
0.00423863	0.0544532	0.0838899	0.121913	0.138002	0.158645	0.174664	0.215713	0.226589	0.243674	0.276921	0.277249	0.326277	0.368907	0.42325	0.481669	0.51836	0.610101	0.778185	1.1048	1.34414	1.46757	1.70643	2.03512	2.50926	2.97596	3.61947	4.75286	8.99935	28.1129
0.00622716	0.0545348	0.0842609	0.122954	0.138635	0.159445	0.175611	0.21809	0.227137	0.245142	0.277952	0.278206	0.32717	0.370417	0.423494	0.481925	0.519289	0.614523	0.782523	1.1108	1.34918	1.48442	1.73654	2.03588	2.5175	2.97656	3.64152	4.7535	9.00178	28.1205
0.00647605	0.0550032	0.0848707	0.123237	0.139106	0.160608	0.176505	0.219895	0.227472	0.246094	0.278085	0.279324	0.327754	0.374693	0.424523	0.482367	0.520124	0.614838	0.789892	1.11594	1.35427	1.50559	1.75067	2.0396	2.53369	2.98688	3.64895	4.75857	9.07426	28.7183
0.00661484	0.0550626	0.084881	0.125636	0.139953	0.161327	0.177961	0.220491	0.228297	0.246094	0.278901	0.27966	0.329131	0.376851	0.424547	0.486072	0.521134	0.622665	0.799087	1.11925	1.36447	1.53362	1.75879	2.07821	2.55919	3.01762	3.69908	4.77639	9.15852	29.1854
0.0079375	0.0562207	0.0849043	0.125728	0.141058	0.16151	0.178547	0.222204	0.228393	0.246094	0.280545	0.281649	0.329492	0.377083	0.426679	0.489435	0.523056	0.624226	0.803527	1.11949	1.36488	1.55088	1.76724	2.13287	2.63283	3.01762	3.70192	4.81934	9.27363	30.2468
0.00980059	0.0572967	0.0859242	0.125807	0.141519	0.161548	0.180897	0.223436	0.23482	0.246094	0.281649	0.282067	0.329748	0.378943	0.433073	0.490374	0.523361	0.629013	0.803595	1.12426	1.37421	1.559	1.80864	2.17135	2.63425	3.03377	3.76441	5.0595	9.28658	30.4047
0.0101495	0.0578479	0.086309	0.126285	0.14157	0.162022	0.181286	0.224624	0.235346	0.246094	0.282576	0.282957	0.332356	0.379333	0.436545	0.492188	0.52351	0.630299	0.805379	1.13682	1.38269	1.56985	1.85356	2.18262	2.64125	3.03649	3.78296	5.18048	9.29806	30.6993
0.0103747	0.0578831	0.0870168	0.126349	0.141891	0.162315	0.181681	0.22547	0.235665	0.246094	0.283692	0.283405	0.333207	0.380438	0.441435	0.494741	0.529531	0.630983	0.814575	1.16992	1.40783	1.572	1.86516	2.21269	2.6691	3.04769	3.7885	5.2123	9.36158	31.0421
0.0105706	0.0579197	0.0873782	0.127033	0.142022	0.162636	0.18185	0.225893	0.236724	0.246291	0.284966	0.284765	0.334891	0.382483	0.442663	0.495703	0.535161	0.642267	0.820303	1.17027	1.41275	1.57725	1.8708	2.29872	2.66933	3.08489	3.79378	5.35678	9.73705	31.3226
0.0110366	0.058297	0.0876156	0.127494	0.142057	0.16433	0.182589	0.226978	0.237687	0.247744	0.285684	0.284801	0.335083	0.383011	0.446963	0.497654	0.535297	0.643462	0.822697	1.23047	1.43242	1.58037	1.87141	2.31345	2.69124	3.09215	3.8174	5.41965	9.75367	34.5649
0.0111973	0.0583819	0.0880722	0.127582	0.142865	0.165979	0.183069	0.228435	0.240301	0.25003	0.28627	0.287382	0.336256	0.386404	0.453442	0.498818	0.536255	0.643894	0.829325	1.23047	1.44023	1.60455	1.92992	2.34239	2.69986	3.1605	3.89065	5.43295	9.97211	35.4403
0.0120968	0.0584741	0.0883542	0.128217	0.14335	0.166584	0.184872	0.229921	0.241197	0.250062	0.287079	0.290167	0.337759	0.393899	0.453784	0.500408	0.538621	0.649606	0.835228	1.23047	1.44183	1.60579	1.95104	2.431	2.71819	3.18276	3.92197	5.50131	10.0804	35.9035
0.0125248	0.0585968	0.089035	0.128491	0.144902	0.167134	0.185492	0.230225	0.242198	0.250401	0.287599	0.290526	0.33809	0.395695	0.455111	0.502038	0.539026	0.65756	0.837466	1.23887	1.44588	1.63232	1.96005	2.48812	2.73977	3.20622	3.94045	5.6637	10.1657	36.1993
0.0136405	0.0588382	0.0899274	0.129221	0.147886	0.167263	0.186087	0.230824	0.246094	0.251624	0.288527	0.293186	0.342756	0.396652	0.458685	0.505864	0.545725	0.661803	0.837743	1.24026	1.45316	1.70918	1.99494	2.48901	2.74676	3.22461	4.05663	5.80635	10.2997	36.7015
0.0140891	0.0589242	0.0903419	0.129352	0.148693	0.167693	0.189899	0.233059	0.246094	0.253596	0.291269	0.299542	0.344049	0.397046	0.458806	0.505888	0.546681	0.66202	0.840937	1.2511	1.48508	1.72234	2.01803	2.50508	2.77162	3.22669	4.11136	5.80802	10.5912	41.3447
0.0142575	0.0591963	0.0905959	0.129876	0.15032	0.168562	0.190574	0.233284	0.246856	0.255612	0.292233	0.300151	0.344616	0.397397	0.460291	0.507249	0.546822	0.662311	0.853023	1.25552	1.48954	1.74691	2.03818	2.52496	2.77325	3.23886	4.12265	5.95221	10.7356	42.6602
0.0146206	0.059629	0.090694	0.130901	0.150812	0.168767	0.191948	0.235851	0.246995	0.255671	0.292851	0.30051	0.345449	0.40233	0.460514	0.508466	0.547995	0.663136	0.85574	1.25961	1.52697	1.76325	2.04103	2.52832	2.77325	3.23911	4.1684	6.00619	10.9421	43.8489
0.0157577	0.0596474	0.0911625	0.131054	0.150875	0.169887	0.192864	0.237259	0.247849	0.259684	0.293275	0.303535	0.346408	0.402598	0.464614	0.513121	0.55922	0.664141	0.869922	1.26842	1.58384	1.77781	2.06651	2.52959	2.79213	3.24536	4.20826	6.06528	11.0304	44.3
0.0159776	0.0598795	0.0916574	0.131333	0.151004	0.170856	0.194554	0.237726	0.250192	0.259847	0.294374	0.307033	0.348029	0.406211	0.465832	0.513584	0.560515	0.666082	0.879546	1.27268	1.58655	1.78911	2.07468	2.52959	2.822	3.27351	4.26305	6.13033	11.1288	44.4958
0.0169845	0.0602769	0.0925153	0.133161	0.151254	0.171104	0.194698	0.2382	0.250527	0.260281	0.294473	0.313585	0.348389	0.407954	0.466825	0.514182	0.565214	0.667996	0.879978	1.27617	1.58715	1.79574	2.09821	2.56929	2.82817	3.33279	4.28195	6.28328	11.1705	44.5037
0.0170581	0.0605137	0.092976	0.133424	0.151845	0.171412	0.195813	0.239477	0.251533	0.261151	0.295177	0.31386	0.351507	0.410082	0.470401	0.516623	0.56535	0.668216	0.883533	1.29671	1.59515	1.80243	2.14713	2.58011	2.86992	3.3738	4.29174	6.29929	11.4086	46.8549
0.0172299	0.0608868	0.0930197	0.133861	0.151907	0.17199	0.197206	0.24046	0.251732	0.261173	0.297241	0.315148	0.353176	0.412068	0.47067	0.519894	0.567324	0.682146	0.884085	1.29768	1.60068	1.82131	2.15398	2.58969	2.88709	3.38122	4.32147	6.51263	11.5126	49.4948
0.0173464	0.0611405	0.094004	0.133979	0.152729	0.173981	0.19769	0.24105	0.253573	0.26131	0.297314	0.317625	0.355391	0.414928	0.471298	0.522188	0.574707	0.683574	0.884469	1.30084	1.6149	1.83104	2.15535	2.58969	2.89803	3.3815	4.34406	6.71705	11.5145	50.7983
0.0175371	0.0619996	0.0942436	0.133997	0.153442	0.175719	0.199439	0.241327	0.255612	0.265981	0.299663	0.319074	0.356491	0.417016	0.472326	0.52293	0.574931	0.693427	0.884767	1.30431	1.64749	1.85008	2.16486	2.59017	2.95465	3.39696	4.38157	6.7575	11.5384	51.7382
0.018001	0.0621843	0.0942604	0.134557	0.15402	0.177397	0.200072	0.241659	0.256611	0.267157	0.300454	0.319609	0.358914	0.417271	0.475159	0.524537	0.579753	0.698206	0.888501	1.30544	1.67936	1.85872	2.20211	2.61601	2.95647	3.41968	4.48067	6.7695	11.839	54.1176
0.0186798	0.0626319	0.0949833	0.13507	0.154649	0.178411	0.202858	0.241978	0.25708	0.267215	0.301119	0.320734	0.36018	0.419055	0.477898	0.525946	0.583916	0.703592	0.894342	1.32184	1.70055	1.91385	2.21409	2.64548	2.96155	3.4199	4.49232	6.80662	11.9501	54.9869
0.0188552	0.0628021	0.0966795	0.135352	0.156516	0.178411	0.203219	0.242262	0.258888	0.267655	0.302396	0.321608	0.362399	0.421351	0.478523	0.52611	0.58765	0.704484	0.897189	1.33261	1.70391	1.91405	2.24822	2.66026	2.9616	3.54596	4.56215	6.81377	12.1401	57.8844
0.0196297	0.0628654	0.0968028	0.135462	0.156559	0.178856	0.203616	0.246094	0.261192	0.268479	0.302903	0.32195	0.365842	0.421783	0.47983	0.527278	0.589185	0.704885	0.901121	1.34758	1.7058	1.94454	2.27476	2.66037	2.97752	3.54921	4.56532	6.88812	12.1606	59.5958
0.0203057	0.0632041	0.097032	0.135518	0.156717	0.178982	0.205984	0.246094	0.261499	0.269272	0.303482	0.322394	0.36677	0.424547	0.479884	0.527869	0.589973	0.706683	0.904979	1.37659	1.70862	1.95307	2.28688	2.68665	2.99374	3.57738	4.5759	6.96427	12.2183	63.3968
0.0204513	0.0636095	0.0982652	0.135952	0.157195	0.180206	0.206284	0.246094	0.262105	0.27115	0.304454	0.323557	0.367154	0.424799	0.481793	0.528451	0.592191	0.711695	0.909338	1.39214	1.72399	1.99772	2.35318	2.7433	2.99386	3.58256	4.57761	7.10779	12.351	64.6419
0.0206357	0.0639048	0.0987828	0.13641	0.158269	0.180323	0.20714	0.250944	0.262355	0.271163	0.305146	0.326952	0.368988	0.424961	0.486593	0.529651	0.596366	0.717209	0.919045	1.39501	1.74573	2.05724	2.35318	2.74946	3.05403	3.59374	4.66204	7.1891	12.4539	65.1475
0.0206883	0.0640735	0.0990699	0.136918	0.159682	0.180464	0.207202	0.252377	0.262805	0.272601	0.306847	0.327201	0.370121	0.428427	0.486753	0.531408	0.599033	0.722631	0.940961	1.40916	1.75102	2.06311	2.44527	2.77115	3.08971	3.71828	4.6693	7.23936	12.5073	65.9024
0.020918	0.0644729	0.0995085	0.138288	0.160722	0.182849	0.208157	0.253157	0.263875	0.273997	0.307014	0.32799	0.372023	0.431514	0.488684	0.531884	0.605012	0.723912	0.944036	1.41691	1.75484	2.06733	2.45492	2.7713	3.09456	3.76	4.70457	7.2588	12.7684	66.1484
0.0214892	0.0653147	0.0997048	0.138353	0.161024	0.184251	0.20893	0.255564	0.264197	0.274086	0.307701	0.328308	0.373739	0.43346	0.49104	0.533352	0.608341	0.726105	0.951074	1.44295	1.75841	2.07157	2.45623	2.8059	3.10755	3.77029	4.72291	7.43729	12.9871	68.3769
0.0219303	0.0653541	0.099925	0.138482	0.162241	0.184507	0.210711	0.258343	0.266946	0.27742	0.307902	0.329631	0.37404	0.434181	0.492188	0.537328	0.618065	0.727375	0.952179	1.44358	1.80147	2.11931	2.45669	2.80674	3.13757	3.77814	4.73439	7.62899	13.0001	69.016
0.0220103	0.0657182	0.100538	0.13859	0.163028	0.184523	0.210771	0.258897	0.267547	0.279353	0.30802	0.33231	0.374758	0.438267	0.495079	0.537609	0.623346	0.728684	0.962461	1.44448	1.82384	2.11931	2.45826	2.81491	3.15459	3.81598	4.75954	7.6992	13.2457	69.2679
0.022012	0.0662542	0.101025	0.139403	0.163579	0.184678	0.210858	0.259929	0.268123	0.279374	0.308263	0.332316	0.37637	0.438303	0.49573	0.538621	0.626482	0.736509	0.970146	1.46044	1.83228	2.12457	2.48454	2.82877	3.18056	3.87658	4.76037	7.76933	13.3255	71.1943
0.0220707	0.0663241	0.101157	0.13944	0.16614	0.186056	0.211693	0.261868	0.268348	0.282299	0.308392	0.333772	0.378054	0.439927	0.495758	0.542308	0.628724	0.740299	0.984375	1.46228	1.83348	2.17956	2.53369	2.90213	3.22461	3.8782	4.78354	7.83259	13.6019	74.2458
0.0222157	0.0665506	0.10118	0.140059	0.166708	0.186668	0.212591	0.262521	0.268479	0.283195	0.313145	0.334533	0.378888	0.440087	0.497018	0.542409	0.630801	0.741384	0.984375	1.46962	1.84112	2.22866	2.60241	2.90331	3.22461	3.91231	4.87455	7.98293	13.801	74.3313
0.0236573	0.0666783	0.102333	0.140566	0.167621	0.186771	0.213608	0.26255	0.268574	0.283658	0.315335	0.336424	0.378932	0.441265	0.499054	0.542633	0.631676	0.748961	1.00045	1.47496	1.84539	2.23117	2.61237	2.90574	3.23081	3.9306	4.90338	8.11332	14.6724	74.9598
0.0237509	0.0672057	0.102423	0.140643	0.167743	0.187047	0.214519	0.26262	0.269792	0.284836	0.315896	0.337307	0.379381	0.442503	0.500479	0.543443	0.632155	0.751272	1.00128	1.49236	1.85621	2.24097	2.62568	2.91539	3.25938	3.96167	4.93238	8.13346	14.7523	75.1493
0.0242686	0.0677901	0.10299	0.140711	0.167935	0.187078	0.215761	0.262677	0.270471	0.285333	0.317781	0.338725	0.37995	0.443328	0.500893	0.545666	0.632274	0.751279	1.01056	1.49312	1.87159	2.28688	2.66191	2.91714	3.28483	3.96692	4.97526	8.14659	15.1664	76.3287
0.0246094	0.0682994	0.103771	0.140945	0.168102	0.187518	0.216041	0.26327	0.27081	0.28593	0.31941	0.338846	0.380069	0.443371	0.503028	0.546294	0.632871	0.75199	1.01465	1.49715	1.88907	2.29214	2.66355	2.92543	3.28644	4.01106	5.17382	8.19163	15.6259	78.2534
0.024752	0.0684614	0.103876	0.141061	0.168519	0.188645	0.21979	0.263302	0.271813	0.287388	0.320845	0.339615	0.380438	0.445377	0.503038	0.550282	0.642769	0.759746	1.02827	1.50766	1.9376	2.30298	2.6713	2.94636	3.29052	4.02174	5.22044	8.36187	15.9008	79.3858
0.024785	0.0685843	0.10412	0.141519	0.168608	0.188952	0.221366	0.263334	0.273895	0.288294	0.322834	0.339691	0.381776	0.445704	0.50509	0.551761	0.648758	0.760579	1.04409	1.51863	1.96598	2.32831	2.67155	2.95549	3.30486	4.05093	5.33598	8.44099	16.0929	82.6707
0.0252183	0.0686056	0.104284	0.142338	0.169785	0.18969	0.221826	0.263939	0.276816	0.289449	0.32421	0.340229	0.382304	0.44656	0.509237	0.566238	0.650134	0.773895	1.04955	1.52741	1.99381	2.32938	2.67781	2.95608	3.34965	4.08017	5.33656	8.46002	16.3999	89.2069
0.0252321	0.0687923	0.104316	0.142359	0.17028	0.189754	0.221977	0.264101	0.277585	0.28982	0.326661	0.343306	0.386474	0.448418	0.51131	0.567149	0.651889	0.776547	1.05292	1.52902	1.99511	2.33465	2.68304	2.96336	3.38887	4.08125	5.46417	8.53204	16.5806	90.8299
0.0254115	0.0705511	0.104888	0.142614	0.171273	0.190832	0.222963	0.264813	0.277723	0.290254	0.326705	0.344339	0.387149	0.448714	0.511527	0.567594	0.655754	0.778217	1.0559	1.5335	1.99982	2.36107	2.68756	2.96336	3.41519	4.08636	5.56847	8.7168	16.656	103.389
0.0254906	0.0708282	0.104944	0.142724	0.17148	0.191451	0.223991	0.266076	0.281815	0.291056	0.32736	0.344493	0.387626	0.44919	0.511802	0.567618	0.658136	0.779831	1.07403	1.53611	2.00176	2.36749	2.69601	2.98553	3.43683	4.09089	5.69595	8.73537	16.8754	110.125
0.0256791	0.0712238	0.105824	0.143053	0.172263	0.194092	0.224821	0.266533	0.284403	0.292255	0.328002	0.345947	0.389312	0.450631	0.512881	0.572383	0.658151	0.780195	1.0754	1.53836	2.00424	2.38306	2.73529	2.98688	3.45269	4.11904	5.73885	8.76315	17.1245	133.94
0.0257312	0.0713765	0.106409	0.143317	0.172575	0.195293	0.225391	0.267956	0.284726	0.292694	0.330368	0.346175	0.389859	0.450987	0.513589	0.575693	0.66066	0.786395	1.08348	1.57676	2.03499	2.38701	2.73541	3.0588	3.46004	4.22298	5.78173	8.81709	17.2915
0.0258589	0.0714729	0.106989	0.143508	0.172957	0.195332	0.225827	0.268455	0.287698	0.293123	0.331826	0.348029	0.391206	0.451681	0.513733	0.581464	0.664139	0.796912	1.09831	1.58554	2.07076	2.3888	2.75141	3.08701	3.49712	4.22787	5.91985	8.8217	17.4907
0.0264516	0.071602	0.107072	0.145231	0.174	0.19534	0.226111	0.26878	0.287803	0.293592	0.333199	0.348353	0.392788	0.454058	0.514551	0.581885	0.670336	0.797613	1.10236	1.60524	2.07315	2.3986	2.77325	3.10117	3.51343	4.24588	5.93627	8.87645	18.1047
0.0265983	0.0716239	0.107213	0.145953	0.174451	0.196891	0.227167	0.268874	0.289066	0.297068	0.333431	0.349577	0.393564	0.455592	0.515476	0.581903	0.674624	0.79782	1.10932	1.61025	2.12873	2.44298	2.80539	3.11885	3.52541	4.26791	6.07807	8.97207	18.1964
0.0267869	0.0721039	0.107665	0.14643	0.17489	0.199544	0.227771	0.27082	0.290182	0.297382	0.333542	0.351145	0.393809	0.456277	0.520895	0.58326	0.675553	0.806116	1.1128	1.61189	2.1376	2.49113	2.8059	3.13119	3.53842	4.2925	6.10733	8.99159	18.3612
0.0273513	0.0724813	0.108336	0.147304	0.174975	0.199655	0.227829	0.271061	0.290626	0.297629	0.334888	0.351673	0.39432	0.457151	0.521247	0.585564	0.680959	0.807513	1.13038	1.62456	2.15587	2.4957	2.81136	3.14584	3.55252	4.31311	6.27464	9.06099	18.5306
0.0277033	0.0725342	0.108511	0.147469	0.175066	0.199956	0.229179	0.273447	0.290755	0.300007	0.335808	0.352518	0.394565	0.457792	0.521559	0.589102	0.688227	0.808954	1.13836	1.64557	2.1687	2.49707	2.83173	3.14824	3.61146	4.42788	6.30067	9.13383	18.6213
0.0279817	0.0727849	0.108602	0.147776	0.176052	0.201049	0.230359	0.27365	0.290964	0.301196	0.336897	0.353294	0.397761	0.459424	0.521844	0.589688	0.688338	0.809995	1.14617	1.65462	2.19135	2.50631	2.85434	3.15197	3.63318	4.42924	6.3166	9.2124	18.7177
0.0281272	0.0741523	0.10869	0.148059	0.176144	0.201901	0.230481	0.274139	0.291728	0.30246	0.337721	0.354401	0.399934	0.459801	0.521889	0.590269	0.692988	0.811999	1.15003	1.66757	2.20978	2.52187	2.86992	3.15207	3.67445	4.4415	6.34722	9.35639	18.9824
0.0288506	0.0743696	0.108956	0.148313	0.176775	0.203071	0.230808	0.274608	0.292451	0.303668	0.338117	0.355024	0.400738	0.46086	0.525253	0.590464	0.69549	0.822487	1.16223	1.66848	2.2186	2.52568	2.87541	3.16491	3.72898	4.44302	6.37668	9.47367	19.0574
0.0289126	0.0744107	0.109919	0.149503	0.177056	0.203769	0.230971	0.27467	0.293361	0.305899	0.339422	0.355431	0.402269	0.46423	0.528184	0.593584	0.699898	0.822843	1.16348	1.67475	2.22122	2.52959	2.88584	3.17655	3.73332	4.47173	6.39905	9.5089	19.3534
0.0292908	0.0745665	0.110651	0.150228	0.17768	0.206761	0.231109	0.274816	0.293402	0.306889	0.340666	0.355957	0.40373	0.465146	0.529366	0.595018	0.702118	0.824501	1.16847	1.68562	2.23164	2.53369	2.90849	3.18864	3.73957	4.50366	6.40382	9.54461	19.5877
0.0292916	0.0751382	0.110753	0.15067	0.178411	0.207235	0.231208	0.275339	0.29483	0.308646	0.34076	0.35681	0.405779	0.465421	0.529529	0.596915	0.706453	0.831693	1.17476	1.68969	2.25466	2.53579	2.91079	3.19255	3.74416	4.53774	6.42863	9.57555	19.7013
0.0295848	0.0754302	0.111152	0.150947	0.178411	0.209978	0.231248	0.275395	0.296108	0.311409	0.342331	0.357651	0.405819	0.468704	0.531054	0.597664	0.707369	0.841037	1.20155	1.69042	2.25612	2.53773	2.92036	3.19683	3.75619	4.58099	6.43688	9.62281	19.7924
0.0299032	0.0757393	0.112035	0.151244	0.178552	0.210071	0.232734	0.275998	0.296814	0.313216	0.343201	0.360495	0.406986	0.472018	0.537171	0.600021	0.711387	0.846626	1.20623	1.69192	2.26973	2.56483	2.92673	3.19962	3.78011	4.63846	6.47372	9.80913	19.8921
0.0300139	0.0758404	0.112552	0.151568	0.178616	0.212369	0.232825	0.276444	0.29721	0.31454	0.343246	0.369675	0.40746	0.473667	0.537972	0.602753	0.714763	0.849118	1.20787	1.71479	2.27205	2.6011	2.93158	3.22461	3.81012	4.71581	6.60166	9.86695	19.9829
0.030203	0.0764613	0.113073	0.152227	0.178717	0.212919	0.234778	0.276585	0.298732	0.315437	0.343826	0.371103	0.408671	0.474405	0.539978	0.603656	0.714914	0.85131	1.20852	1.71483	2.31503	2.61601	2.95086	3.22461	3.81307	4.73057	6.60339	9.88262	20.1668
0.0302284	0.0766553	0.113343	0.152724	0.178762	0.213299	0.234932	0.276737	0.299327	0.317682	0.344611	0.371792	0.411498	0.475134	0.541406	0.60396	0.719214	0.853023	1.21051	1.73161	2.31748	2.62169	2.9524	3.22651	3.86539	4.74871	6.6992	9.93256	20.2695
0.0311571	0.0774984	0.113569	0.153278	0.179306	0.213671	0.2353	0.277131	0.301619	0.319313	0.34512	0.37214	0.412748	0.47597	0.545455	0.605773	0.723072	0.853748	1.21174	1.74015	2.35318	2.62356	2.97656	3.23858	3.86709	4.8601	6.7575	9.95772	20.2847
0.031228	0.0780708	0.113986	0.15334	0.179383	0.214651	0.235922	0.277521	0.302059	0.319397	0.345676	0.372714	0.413978	0.47909	0.545751	0.606134	0.724461	0.859062	1.21313	1.74293	2.35839	2.63283	2.97735	3.25742	3.88255	4.86233	6.80662	10.1168	20.5131
0.031482	0.078142	0.114458	0.154943	0.179584	0.21582	0.236701	0.277616	0.303386	0.319766	0.347346	0.373246	0.415884	0.479569	0.549925	0.612274	0.725989	0.867083	1.21672	1.76324	2.37227	2.65051	2.98688	3.25799	3.92197	4.8876	6.86189	10.3446	20.7828
0.0315569	0.078258	0.114646	0.155044	0.180296	0.215938	0.237163	0.277863	0.304073	0.322985	0.347624	0.375306	0.415953	0.482122	0.550282	0.61279	0.726084	0.872588	1.21901	1.78367	2.37337	2.65978	2.99716	3.26538	3.93036	4.96089	6.8939	10.3726	21.4313
0.031642	0.0786601	0.114727	0.155451	0.181642	0.216334	0.237259	0.280919	0.304758	0.324136	0.348029	0.376054	0.417682	0.486983	0.551631	0.614587	0.727511	0.872627	1.23047	1.79815	2.38582	2.67155	3.01503	3.29002	3.9622	4.98846	6.96928	10.4293	21.6185
0.0322096	0.0787393	0.114819	0.155539	0.181794	0.216582	0.237509	0.281916	0.304911	0.324245	0.348029	0.378932	0.418877	0.487966	0.553286	0.617621	0.729003	0.8731	1.23047	1.81484	2.38717	2.70997	3.01629	3.29341	3.97577	5.31666	6.97532	10.4679	21.7817
0.0326529	0.079025	0.1149	0.155606	0.182091	0.217633	0.237749	0.282568	0.306313	0.324786	0.348029	0.381246	0.420141	0.4881	0.553474	0.618114	0.734387	0.87923	1.23925	1.83842	2.38902	2.75141	3.02271	3.41428	3.99504	5.3316	7.16078	10.5104	22.211
0.0327147	0.0792437	0.115009	0.15584	0.18273	0.219872	0.23777	0.282895	0.308382	0.324862	0.348029	0.382784	0.420587	0.488438	0.55439	0.619992	0.736202	0.87938	1.23975	1.8386	2.4056	2.75141	3.0368	3.42999	4.03328	5.40809	7.17322	10.8932	22.4607
0.0331143	0.0793524	0.116056	0.155926	0.18334	0.219894	0.238312	0.283904	0.31015	0.32596	0.348029	0.383	0.421633	0.488441	0.555264	0.623849	0.739244	0.88265	1.23994	1.84718	2.41103	2.76233	3.03876	3.43789	4.03791	5.41965	7.26719	11.0056	22.6974
0.033625	0.0802538	0.116716	0.156158	0.183491	0.221046	0.238778	0.284181	0.31126	0.327769	0.348831	0.38314	0.42274	0.491499	0.556851	0.624486	0.749918	0.903104	1.24231	1.85299	2.41438	2.76903	3.05618	3.45026	4.0407	5.46909	7.27166	11.1858	22.8155
0.033761	0.0802885	0.11686	0.156418	0.187628	0.222129	0.244813	0.287698	0.311441	0.328232	0.349526	0.383723	0.424547	0.492188	0.559286	0.627214	0.75199	0.909269	1.25366	1.85536	2.42374	2.77041	3.06158	3.49174	4.06778	5.50282	7.36939	11.2936	23.1017
0.0337723	0.0806622	0.116954	0.156526	0.189802	0.223225	0.246094	0.288394	0.311472	0.32835	0.3496	0.383937	0.424977	0.492188	0.560218	0.62837	0.755739	0.910882	1.25484	1.87088	2.44298	2.77325	3.06912	3.51776	4.09353	5.57933	7.39433	11.3995	23.2122
0.0339433	0.0807857	0.117073	0.156732	0.192838	0.223611	0.246094	0.289613	0.311633	0.331615	0.34984	0.384958	0.427098	0.492437	0.561391	0.629494	0.756561	0.911831	1.25769	1.87996	2.45652	2.77533	3.07046	3.52091	4.12297	5.59742	7.44216	11.4003	23.2583
0.0344202	0.0809208	0.118496	0.157408	0.193223	0.223773	0.246094	0.289825	0.31226	0.332147	0.350746	0.385274	0.428427	0.49354	0.567302	0.633741	0.760102	0.916044	1.27351	1.88765	2.47911	2.77591	3.08155	3.55695	4.13588	5.6118	7.4955	11.4276	24.0724
0.03495	0.0810415	0.118626	0.157491	0.195251	0.224831	0.246094	0.291782	0.312511	0.332244	0.351542	0.385373	0.433344	0.493989	0.56754	0.635369	0.760698	0.918198	1.27712	1.92059	2.48047	2.78023	3.08908	3.57021	4.19094	5.66776	7.69045	11.4665	24.2686
0.0354117	0.0811812	0.118784	0.158174	0.195493	0.225266	0.246094	0.293279	0.312551	0.33622	0.351864	0.38597	0.43439	0.494183	0.567604	0.635937	0.764514	0.925911	1.28276	1.93378	2.52496	2.8059	3.09365	3.57774	4.20525	5.67701	7.71408	11.4884	25.0605
0.0366971	0.0811984	0.119306	0.158268	0.195533	0.225586	0.246094	0.295856	0.313052	0.336834	0.354093	0.386746	0.436489	0.494344	0.568175	0.637284	0.76566	0.929939	1.29127	1.94059	2.52959	2.8059	3.0945	3.59386	4.2141	5.69296	7.72228	11.6105	25.4532
0.0367142	0.0814492	0.119612	0.158284	0.196013	0.225713	0.246094	0.29711	0.315033	0.337153	0.359799	0.386748	0.436659	0.494613	0.568287	0.63759	0.767635	0.9305	1.3035	1.94316	2.53262	2.80633	3.0966	3.59776	4.22409	5.72285	7.72358	11.6681	25.5779
0.0367831	0.0816354	0.120484	0.158289	0.196481	0.226113	0.246094	0.297551	0.315447	0.339075	0.35989	0.387368	0.439637	0.496777	0.571567	0.63892	0.768958	0.938656	1.31053	1.9576	2.53572	2.82464	3.11371	3.60448	4.22409	5.74512	7.92104	11.689	25.9042
0.0369346	0.0828019	0.121031	0.158403	0.196587	0.227681	0.246094	0.298334	0.315794	0.340405	0.360808	0.389216	0.444774	0.497427	0.574456	0.63985	0.770897	0.946801	1.3132	1.98012	2.5385	2.83755	3.1167	3.61171	4.23786	5.76616	7.9506	11.833	26.1824
0.0370304	0.083588	0.121153	0.158928	0.197037	0.227989	0.247215	0.298573	0.316983	0.340707	0.361045	0.389486	0.446312	0.497997	0.577016	0.643256	0.771524	0.949966	1.31426	1.99152	2.54011	2.85526	3.15154	3.66537	4.25164	5.80373	7.98049	12.0336	26.2438
0.0370351	0.0838969	0.121518	0.159621	0.197083	0.22865	0.24786	0.298673	0.317011	0.341259	0.361645	0.391726	0.447729	0.498901	0.578181	0.644295	0.771578	0.951915	1.32191	1.99982	2.55748	2.86053	3.15629	3.66627	4.35029	5.83403	8.00628	12.1187	26.3775
0.0371549	0.0840226	0.121539	0.161286	0.197338	0.229829	0.250819	0.29869	0.31733	0.342284	0.361901	0.391885	0.449811	0.499122	0.579628	0.644707	0.772231	0.952193	1.32545	2.0151	2.58707	2.89963	3.18368	3.6728	4.42469	5.87256	8.05667	12.1201	26.4275
0.0371899	0.0840346	0.121888	0.161358	0.197784	0.230914	0.251555	0.298932	0.317557	0.34562	0.364485	0.391976	0.450846	0.499398	0.580881	0.647231	0.772373	0.960777	1.34323	2.01763	2.60819	2.90282	3.1977	3.67454	4.47231	5.89552	8.1237	12.1661	26.6219
0.0375259	0.0842836	0.122177	0.161703	0.198461	0.231608	0.252	0.299126	0.31766	0.345743	0.364498	0.394867	0.451306	0.499722	0.582411	0.648025	0.773467	0.961449	1.34774	2.03894	2.61601	2.90306	3.22181	3.68487	4.51793	5.89687	8.14524	12.1933	26.8131
0.037923	0.0851603	0.122615	0.162009	0.199013	0.231952	0.252572	0.299675	0.318486	0.347062	0.364907	0.397857	0.45151	0.501674	0.582898	0.650819	0.781452	0.962836	1.35043	2.05243	2.61601	2.90308	3.22461	3.69035	4.55288	5.95221	8.26578	12.3	26.9807
0.0383693	0.0852555	0.123036	0.162968	0.199535	0.233109	0.253876	0.300952	0.31919	0.347692	0.365268	0.39824	0.451683	0.506424	0.58404	0.651974	0.786206	0.964936	1.35262	2.07477	2.62628	2.91732	3.28641	3.69686	4.56184	5.9573	8.35995	12.3323	27.0271
0.0383725	0.0853513	0.123054	0.16299	0.200713	0.235059	0.255093	0.302003	0.31938	0.347965	0.36567	0.399754	0.451847	0.50738	0.584072	0.654556	0.787053	0.965942	1.35303	2.08456	2.64511	2.95065	3.28764	3.74839	4.58827	6.02065	8.66935	12.3378	27.0504
0.0385198	0.0855033	0.123211	0.163038	0.200965	0.236409	0.255483	0.302079	0.322261	0.348029	0.366736	0.40037	0.454828	0.510618	0.584213	0.654609	0.791961	0.967106	1.35645	2.08546	2.65051	2.95182	3.29347	3.76075	4.62499	6.11155	8.73893	12.4987	27.2791
0.0385575	0.0855224	0.123333	0.163448	0.201282	0.238297	0.255849	0.302415	0.323485	0.353012	0.368717	0.402095	0.455864	0.511812	0.584354	0.655643	0.793143	0.967139	1.36562	2.0925	2.65872	2.95837	3.30169	3.77389	4.64028	6.15603	8.77841	12.5604	27.6539
0.0388882	0.085641	0.124137	0.163639	0.201759	0.238778	0.256162	0.30301	0.323932	0.353667	0.370001	0.405596	0.45637	0.513297	0.586174	0.660851	0.79976	0.96912	1.371	2.11531	2.66191	2.95959	3.30473	3.78345	4.66737	6.27418	8.79066	12.6062	27.6689
0.0389126	0.0859805	0.124911	0.166012	0.202486	0.239081	0.256317	0.304872	0.325083	0.355218	0.373813	0.4061	0.456573	0.514803	0.588155	0.663005	0.810433	0.970291	1.37205	2.11698	2.66191	2.9677	3.31085	3.78627	4.6771	6.30717	8.8217	12.6488	27.7439
0.0392845	0.086748	0.125354	0.166187	0.202595	0.239472	0.259892	0.305041	0.326155	0.355656	0.375145	0.406294	0.457302	0.51531	0.588455	0.668281	0.81133	0.979672	1.39477	2.11931	2.66191	2.97065	3.33274	3.81088	4.69909	6.35633	8.86495	12.7679	27.9224
0.0394259	0.0870282	0.125879	0.166525	0.202607	0.240976	0.259912	0.30691	0.326404	0.355776	0.375558	0.408524	0.457384	0.517872	0.590533	0.675551	0.814119	0.983611	1.40038	2.12571	2.67155	2.97356	3.33713	3.84411	4.74236	6.37734	8.87645	13.112	28.454
0.0395098	0.0874558	0.12691	0.16653	0.20297	0.241107	0.261415	0.307848	0.326907	0.355813	0.375604	0.409264	0.458677	0.518224	0.591074	0.6786	0.816274	0.987915	1.40091	2.13361	2.67941	2.97596	3.35341	3.85072	4.79182	6.45967	9.01607	13.1263	28.6124
0.0396205	0.0881528	0.127543	0.166755	0.203001	0.241835	0.261575	0.311956	0.327088	0.355813	0.378252	0.410309	0.461168	0.521854	0.595144	0.678802	0.816357	0.99442	1.41119	2.14733	2.68651	2.97656	3.38025	3.87778	4.8289	6.47372	9.03847	13.3209	28.7366
0.0400555	0.0885016	0.127904	0.166861	0.203419	0.24192	0.261621	0.312297	0.331646	0.356326	0.378932	0.410933	0.461213	0.522501	0.595265	0.680654	0.816729	0.999202	1.42028	2.15446	2.69784	2.97656	3.39719	3.89923	4.96468	6.4935	9.13554	13.591	28.7404
0.0405728	0.0887205	0.129066	0.167291	0.203919	0.242597	0.264538	0.313346	0.332613	0.356729	0.380379	0.414145	0.461695	0.524767	0.597571	0.684589	0.819645	0.999336	1.42515	2.15788	2.69874	2.98688	3.39783	3.90762	4.9824	6.49564	9.15336	13.6525	29.0553
0.0406859	0.0887803	0.129514	0.16755	0.204556	0.242945	0.265798	0.313593	0.33347	0.356953	0.382058	0.41452	0.46251	0.524902	0.597912	0.686326	0.820713	1.00169	1.4314	2.17299	2.70429	2.99522	3.40065	3.93847	4.98302	6.49679	9.18823	13.6542	29.2945
0.0411984	0.0888144	0.129516	0.167721	0.205322	0.244716	0.266019	0.314789	0.334079	0.357202	0.382744	0.414704	0.462702	0.52617	0.600715	0.687862	0.820993	1.00705	1.43496	2.17367	2.71842	3.00392	3.40519	3.94094	4.99186	6.59733	9.20065	13.6694	29.5473
0.0412858	0.0888427	0.130448	0.167781	0.205809	0.245155	0.266162	0.315458	0.334356	0.357524	0.383478	0.41728	0.463012	0.528288	0.60191	0.688023	0.823069	1.0087	1.44321	2.17452	2.72919	3.01247	3.41875	3.97649	5.07335	6.60915	9.24736	13.9506	30.1046
0.0415778	0.0889051	0.130722	0.167893	0.206592	0.245587	0.266823	0.317568	0.33606	0.357536	0.383778	0.417797	0.464459	0.529497	0.603177	0.688201	0.826121	1.01452	1.44477	2.2186	2.73634	3.01765	3.43132	3.99964	5.10255	6.69798	9.27011	14.6524	30.3016
0.0417141	0.089411	0.130889	0.168776	0.207615	0.245767	0.267162	0.317924	0.337268	0.358289	0.384626	0.418283	0.467028	0.532097	0.603248	0.689561	0.829311	1.02399	1.44591	2.21967	2.73977	3.02186	3.43943	3.99964	5.14264	6.71705	9.28639	14.7656	31.3246
0.0417245	0.0895525	0.131184	0.168976	0.207637	0.246094	0.26854	0.31901	0.340753	0.358966	0.384976	0.421314	0.470888	0.532848	0.604256	0.689844	0.831208	1.02485	1.45338	2.23896	2.73977	3.04017	3.45489	4.00732	5.17914	6.7575	9.39679	14.9693	31.3774
0.0421278	0.0897114	0.131302	0.169307	0.208908	0.246094	0.270369	0.31918	0.342304	0.3617	0.385504	0.42348	0.472061	0.534971	0.60609	0.695933	0.831456	1.0274	1.4543	2.24524	2.76438	3.04151	3.45983	4.01551	5.19135	6.7575	9.42924	14.9701	31.5662
0.0422402	0.0898889	0.131421	0.170019	0.209045	0.246094	0.270702	0.319706	0.343121	0.363186	0.386545	0.425642	0.4722	0.535877	0.609144	0.696707	0.831693	1.03224	1.46085	2.26887	2.77325	3.05488	3.48176	4.01603	5.28765	6.77741	9.44627	15.4458	33.4593
0.042266	0.0898907	0.131575	0.170301	0.209359	0.246094	0.271324	0.319802	0.343627	0.363193	0.388683	0.425746	0.475782	0.535929	0.61638	0.698826	0.83577	1.03302	1.46124	2.28432	2.77395	3.0597	3.52438	4.07566	5.42487	6.7961	9.45027	15.4925	33.6436
0.0423583	0.0899034	0.131623	0.171759	0.210422	0.246094	0.273001	0.31997	0.343926	0.366407	0.389486	0.426392	0.475935	0.539338	0.620965	0.699539	0.837792	1.03913	1.46573	2.29625	2.77495	3.06131	3.52607	4.12208	5.46381	6.81396	9.53279	16.0718	33.7715
0.0426737	0.0902483	0.131679	0.171836	0.210574	0.246094	0.273045	0.320063	0.343932	0.366965	0.389809	0.426823	0.47597	0.539342	0.62256	0.700432	0.842541	1.04012	1.47403	2.30158	2.78423	3.06558	3.57231	4.13621	5.53027	6.83798	9.55532	16.0923	33.8651
0.0428051	0.0905536	0.132174	0.172342	0.21102	0.247189	0.273159	0.320086	0.344292	0.368469	0.392833	0.428745	0.477792	0.539634	0.622586	0.702363	0.856691	1.04699	1.48433	2.31132	2.78503	3.06974	3.58062	4.14172	5.56847	6.98299	9.58616	16.2751	34.2943
0.0428433	0.0906101	0.132601	0.172448	0.212472	0.247517	0.274971	0.322238	0.345376	0.369545	0.394468	0.430279	0.478156	0.540102	0.63057	0.704536	0.864539	1.05598	1.49127	2.33764	2.78965	3.07624	3.59509	4.23467	5.57579	7.00786	9.67114	16.4336	34.8205
0.0428657	0.0907951	0.132742	0.172767	0.214592	0.247915	0.275031	0.322597	0.346885	0.373117	0.397075	0.430795	0.478483	0.540171	0.631659	0.705658	0.868942	1.06422	1.49908	2.33951	2.79006	3.11627	3.62561	4.26798	5.60028	7.04266	9.69497	16.7811	35.0062
0.0428885	0.0910346	0.133279	0.17286	0.215066	0.248047	0.275082	0.32375	0.348029	0.373329	0.39761	0.43177	0.480294	0.543835	0.632281	0.70644	0.878001	1.06496	1.49926	2.35318	2.80244	3.15682	3.63423	4.27739	5.6118	7.08199	9.69497	16.8244	35.3464
0.0430654	0.0911128	0.133785	0.173589	0.215297	0.248047	0.275109	0.323752	0.34803	0.374401	0.398332	0.434122	0.481033	0.544848	0.633475	0.707361	0.882893	1.06524	1.5072	2.35318	2.8059	3.19398	3.66127	4.29516	5.61894	7.09057	9.82307	16.8797	35.9749
0.0430884	0.0914351	0.133875	0.173604	0.215384	0.248047	0.275619	0.324757	0.349794	0.374883	0.398931	0.436224	0.481295	0.545757	0.63466	0.713356	0.887304	1.07928	1.50958	2.36286	2.81584	3.19922	3.67122	4.29784	5.63995	7.18486	9.84	17.0189	36.3882
0.0431312	0.0914761	0.134587	0.173876	0.21639	0.248123	0.276074	0.326478	0.351652	0.375103	0.400672	0.437073	0.482589	0.545998	0.636876	0.718943	0.893932	1.09677	1.5173	2.36807	2.82817	3.20811	3.68494	4.31658	5.70195	7.28396	9.85347	17.0547	37.5082
0.0431712	0.0915132	0.134975	0.17484	0.216863	0.248285	0.277068	0.327311	0.353071	0.375851	0.402095	0.437854	0.483624	0.546413	0.637152	0.720202	0.898267	1.09764	1.51822	2.37172	2.83253	3.21497	3.68638	4.34266	5.70434	7.29195	9.90202	17.1101	40.5637
0.0435282	0.0920003	0.135159	0.174876	0.217531	0.249403	0.277897	0.327841	0.355238	0.376813	0.403539	0.43872	0.483711	0.550282	0.641682	0.723027	0.901831	1.12956	1.5228	2.37518	2.83963	3.22418	3.69022	4.34996	5.71375	7.29215	10.0988	17.1301	40.7537
0.0436255	0.0923765	0.135317	0.175441	0.217795	0.249701	0.278782	0.328476	0.35675	0.378981	0.404359	0.438902	0.486334	0.555242	0.642183	0.723791	0.902043	1.14325	1.52989	2.38555	2.8537	3.22451	3.69698	4.38157	5.74512	7.35336	10.1267	17.1364	41.4341
0.0438084	0.0924967	0.135352	0.175588	0.218291	0.250787	0.278964	0.328595	0.35715	0.379718	0.404634	0.439752	0.487924	0.555917	0.642657	0.72781	0.903295	1.14427	1.53659	2.39772	2.86797	3.22461	3.72688	4.39503	5.74512	7.38087	10.1348	17.294	41.5639
0.0439031	0.0928242	0.135632	0.175665	0.218336	0.25119	0.280576	0.33028	0.359009	0.379939	0.404923	0.439789	0.488189	0.558578	0.644783	0.728548	0.905702	1.14474	1.54453	2.41668	2.86987	3.23242	3.73799	4.50297	5.75638	7.44815	10.2184	17.378	42.2853
0.044464	0.0931621	0.135741	0.176764	0.218472	0.251389	0.281939	0.332511	0.359574	0.380365	0.405559	0.440615	0.488911	0.559469	0.647812	0.731683	0.910085	1.14492	1.55485	2.42374	2.87368	3.23635	3.74101	4.53774	5.78005	7.48465	10.2433	17.5159	42.3942
0.0445069	0.0932792	0.136482	0.176821	0.21914	0.251487	0.282395	0.332618	0.361348	0.381478	0.405951	0.441085	0.490978	0.560823	0.649181	0.733191	0.911866	1.1465	1.56062	2.43093	2.88045	3.24509	3.75363	4.57891	5.78312	7.53591	10.2582	17.7036	42.5906
0.0448723	0.0938425	0.136523	0.177386	0.220009	0.25176	0.282895	0.332769	0.362173	0.381534	0.40823	0.442265	0.49123	0.561356	0.65146	0.738172	0.920095	1.14722	1.56361	2.43168	2.88407	3.26358	3.75363	4.59627	5.80477	7.55598	10.2688	18.119	42.8221
0.0451473	0.0940518	0.13657	0.177475	0.220282	0.251878	0.283722	0.333707	0.362993	0.381615	0.408818	0.44249	0.492188	0.563555	0.653963	0.738281	0.920147	1.14754	1.56661	2.44298	2.89683	3.26396	3.76451	4.60873	5.85633	7.66455	10.2993	18.1505	43.2827
0.0452461	0.0940803	0.136642	0.179452	0.220301	0.252011	0.283914	0.333707	0.366016	0.381679	0.411532	0.443506	0.492188	0.563935	0.657184	0.738281	0.92109	1.1486	1.56762	2.45826	2.89692	3.28263	3.78913	4.64838	5.86042	7.68025	10.3336	18.2176	43.3027
0.0453694	0.0943821	0.137571	0.179719	0.221434	0.252842	0.284547	0.334967	0.367107	0.381693	0.411653	0.443809	0.494724	0.564329	0.658928	0.756683	0.92292	1.14875	1.57524	2.46094	2.9041	3.28312	3.78938	4.67227	5.8693	7.73609	10.3389	18.3548	43.393
0.0454416	0.0944792	0.137748	0.180308	0.222728	0.253308	0.285894	0.336242	0.367184	0.383056	0.412072	0.446485	0.495286	0.564764	0.659013	0.758285	0.924666	1.14884	1.57914	2.46094	2.906	3.29436	3.79439	4.69132	5.90057	7.83259	10.4554	18.5858	44.2741
0.0455441	0.0945231	0.138175	0.180418	0.222745	0.253845	0.286219	0.336673	0.367295	0.383662	0.414069	0.449644	0.495306	0.566532	0.660073	0.759665	0.92546	1.15265	1.5854	2.46577	2.91305	3.30169	3.85198	4.75286	5.92672	7.84804	10.6163	18.7569	46.3659
0.0457847	0.09488	0.13857	0.180817	0.223773	0.254377	0.286557	0.33672	0.368064	0.385966	0.414844	0.450105	0.49684	0.568379	0.662576	0.759715	0.930073	1.15755	1.58747	2.46629	2.91677	3.30956	3.85891	4.80219	5.98312	7.85971	10.7108	18.7905	47.0509
0.0460592	0.095347	0.138693	0.181187	0.224176	0.255571	0.289623	0.337214	0.369189	0.386324	0.414922	0.451385	0.497301	0.570264	0.662918	0.763093	0.930086	1.16056	1.5882	2.48047	2.92214	3.33703	3.87488	4.88482	6.03653	8.15439	10.7866	18.8487	47.9851
0.0461301	0.095353	0.139016	0.181202	0.224429	0.255887	0.290249	0.337255	0.369558	0.388122	0.414926	0.451446	0.500085	0.573782	0.663005	0.767	0.934676	1.161	1.59135	2.48347	2.92335	3.33959	3.88255	4.93088	6.03975	8.24387	11.1184	18.9881	48.0633
0.0462355	0.0953792	0.139524	0.18121	0.224499	0.256636	0.29104	0.338143	0.371821	0.388169	0.41603	0.451671	0.503517	0.576075	0.665235	0.767142	0.940458	1.16357	1.60447	2.48614	2.93826	3.3738	3.91181	4.93346	6.06087	8.41401	11.156	19.1348	48.2852
0.0464109	0.0957279	0.140365	0.181482	0.224731	0.256842	0.291664	0.338378	0.372036	0.38898	0.416163	0.453398	0.506574	0.577351	0.666871	0.772212	0.948543	1.17393	1.6053	2.49418	2.96427	3.38005	3.92197	4.93663	6.10347	8.41447	11.1616	19.1922	50.7226
0.0468306	0.0957996	0.140764	0.181989	0.22505	0.25899	0.292519	0.339361	0.372453	0.389032	0.416527	0.453536	0.506865	0.578587	0.66878	0.773242	0.953708	1.17398	1.60733	2.51357	2.97231	3.38557	3.93269	4.98089	6.14959	8.51119	11.298	19.476	51.1384
0.0471449	0.0959172	0.141076	0.182355	0.226107	0.259786	0.292784	0.340783	0.373544	0.391127	0.418642	0.453864	0.508665	0.579769	0.670927	0.777135	0.957098	1.17849	1.61552	2.52711	2.97656	3.4005	3.94518	5.03071	6.172	8.53222	11.3444	19.5914	51.8703
0.0473961	0.096026	0.141341	0.182482	0.226791	0.259949	0.293578	0.342959	0.373572	0.395565	0.419274	0.454834	0.509581	0.580199	0.673192	0.779561	0.957354	1.17859	1.62404	2.52959	2.97964	3.40475	4.0156	5.03835	6.19648	8.57099	11.3444	19.8102	52.3231
0.0474193	0.0961348	0.141427	0.182539	0.228204	0.260046	0.29362	0.343455	0.374357	0.396113	0.421717	0.455213	0.510013	0.580512	0.676045	0.781452	0.957461	1.18767	1.62473	2.52959	2.98505	3.41599	4.02515	5.06769	6.20415	8.68375	11.363	19.8651	52.5627
0.0475493	0.0961942	0.141446	0.183054	0.228596	0.260318	0.294412	0.344498	0.374702	0.396601	0.42297	0.457085	0.5104	0.580755	0.680103	0.783509	0.960886	1.19068	1.62748	2.52959	2.99093	3.41855	4.13693	5.07335	6.21849	8.78087	11.4506	19.9214	54.7303
0.0475954	0.096218	0.141944	0.183311	0.228926	0.260647	0.294942	0.34535	0.375057	0.397226	0.423679	0.457277	0.511567	0.582381	0.681819	0.787259	0.963695	1.19992	1.62829	2.53369	2.99386	3.43071	4.17264	5.11785	6.2234	8.85938	11.4718	20.048	54.8988
0.0481271	0.0962439	0.142523	0.183672	0.229218	0.263108	0.295448	0.345785	0.376514	0.397716	0.425642	0.45753	0.512881	0.583357	0.682734	0.788217	0.966299	1.20286	1.63935	2.53369	3.0003	3.43865	4.19083	5.14816	6.3438	8.88926	11.5512	20.0569	56.399
0.0481681	0.0972326	0.142576	0.183876	0.229305	0.263827	0.29568	0.34608	0.376614	0.398838	0.426542	0.459407	0.514093	0.584245	0.68452	0.789278	0.967013	1.22339	1.65174	2.53676	3.02091	3.48118	4.22812	5.14992	6.35094	8.89008	11.6914	20.0847	57.3895
0.0481874	0.0975111	0.142634	0.184396	0.22968	0.26415	0.29636	0.346639	0.376806	0.399787	0.42758	0.46032	0.514505	0.58766	0.684581	0.791838	0.968423	1.22351	1.6519	2.54951	3.02223	3.50223	4.23929	5.21552	6.47372	8.90441	11.7766	20.1512	60.2407
0.0483599	0.0976433	0.142705	0.184439	0.229737	0.26497	0.29686	0.346829	0.377182	0.401138	0.427906	0.461318	0.515859	0.591537	0.685012	0.793088	0.96903	1.22963	1.66469	2.5538	3.0567	3.50513	4.25954	5.21728	6.48193	8.99137	11.8029	20.2172	60.4233
0.0483601	0.0976683	0.142772	0.184665	0.22995	0.265092	0.300028	0.347297	0.377469	0.401859	0.428649	0.462464	0.517445	0.593742	0.685904	0.79548	0.969553	1.23047	1.66496	2.56777	3.06396	3.55149	4.26261	5.25431	6.48626	9.03536	11.8151	20.3604	61.7258
0.0483699	0.0978237	0.142845	0.185053	0.230809	0.266998	0.300868	0.348029	0.378281	0.402063	0.428748	0.463112	0.520816	0.595875	0.692366	0.800682	0.970483	1.23047	1.66535	2.57338	3.07232	3.55149	4.28068	5.28484	6.52069	9.05545	11.856	20.3944	61.7439
0.0484875	0.0980968	0.143032	0.185538	0.231375	0.267337	0.301182	0.348029	0.378434	0.402149	0.429887	0.464477	0.522075	0.603512	0.69417	0.801241	0.972891	1.23047	1.68194	2.57414	3.07617	3.56488	4.29784	5.30235	6.68542	9.08014	11.9003	20.411	61.8119
0.0484936	0.0986032	0.143083	0.185805	0.232268	0.267877	0.301208	0.348029	0.37871	0.403541	0.42996	0.467146	0.522857	0.604481	0.694294	0.806454	0.973381	1.23047	1.69553	2.57436	3.09475	3.57622	4.33043	5.32638	6.6934	9.13305	12.2173	20.6639	62.0388
0.048556	0.0986118	0.143199	0.18588	0.232944	0.269017	0.301343	0.348029	0.378884	0.407098	0.430419	0.467856	0.523238	0.60609	0.696058	0.808935	0.976135	1.23047	1.70189	2.57713	3.10549	3.57738	4.34943	5.34133	6.80126	9.13535	12.2603	21.0263	63.2365
0.048568	0.0992314	0.143301	0.186027	0.233388	0.270168	0.303399	0.348029	0.380466	0.407318	0.430432	0.467924	0.524926	0.606509	0.696058	0.811545	0.976602	1.24606	1.70342	2.58378	3.10802	3.58804	4.36031	5.34401	6.85538	9.14299	12.2662	21.0881	63.4549
0.0487381	0.0998659	0.143666	0.186747	0.233461	0.270805	0.303489	0.348029	0.380685	0.409055	0.431995	0.469102	0.525253	0.609407	0.696748	0.81551	0.977615	1.24631	1.7108	2.60418	3.13318	3.59733	4.40152	5.38263	6.86871	9.15852	12.3539	21.6367	63.7671
0.0489253	0.100025	0.143806	0.187155	0.23449	0.270981	0.303785	0.348147	0.381945	0.409625	0.432772	0.469448	0.526261	0.609524	0.697199	0.816729	0.978296	1.24799	1.71587	2.63491	3.13706	3.59743	4.44646	5.38942	6.91064	9.2446	12.4429	21.7392	64.2116
0.049122	0.100562	0.144487	0.187331	0.234767	0.271362	0.304205	0.348503	0.382031	0.40965	0.433246	0.470572	0.526336	0.609601	0.697631	0.817038	0.981585	1.25484	1.71802	2.63524	3.15017	3.60291	4.44714	5.43317	6.92071	9.24736	12.4732	21.9022	65.1661
0.0492473	0.100721	0.144598	0.187659	0.235028	0.271588	0.304491	0.348982	0.382674	0.40999	0.433676	0.470787	0.528884	0.610222	0.69766	0.818137	0.982127	1.2564	1.73305	2.64053	3.15891	3.66354	4.45083	5.49303	6.92433	9.25222	12.5174	21.9854	65.267
0.0493307	0.100848	0.144728	0.188181	0.235042	0.272577	0.305381	0.349931	0.383944	0.410596	0.436884	0.472061	0.529465	0.611149	0.69879	0.818494	0.983469	1.26021	1.74306	2.67155	3.17869	3.66796	4.45987	5.51892	6.94126	9.25874	12.5283	22.2013	65.5508
0.0495353	0.101121	0.145122	0.18823	0.235074	0.274763	0.306672	0.350259	0.384127	0.41239	0.43808	0.473147	0.529791	0.614411	0.699216	0.819145	0.984889	1.26191	1.75333	2.67806	3.18087	3.74694	4.49079	5.51977	6.9953	9.29215	12.5361	22.2993	65.9614
0.0495819	0.101176	0.145498	0.188237	0.235445	0.275622	0.3072	0.351282	0.38429	0.413184	0.440341	0.474242	0.53119	0.614425	0.699824	0.823069	0.995689	1.27282	1.76549	2.67875	3.18214	3.77814	4.52299	5.52138	7.0111	9.36993	12.5469	22.3177	66.3929
0.0497344	0.101305	0.145611	0.188251	0.236773	0.27574	0.307255	0.352186	0.385644	0.416212	0.441192	0.475165	0.531281	0.614641	0.701616	0.826091	0.997134	1.27304	1.77461	2.68304	3.18568	3.80391	4.5429	5.53893	7.06342	9.37046	12.6407	22.5736	68.3642
0.0498302	0.10141	0.14587	0.188631	0.236902	0.275835	0.309421	0.353294	0.386497	0.416549	0.441332	0.475533	0.533326	0.615547	0.703056	0.830817	0.999633	1.27385	1.80138	2.68646	3.23414	3.8202	4.57788	5.57933	7.10237	9.37097	12.796	22.6376	68.4853
0.0502021	0.101453	0.145929	0.188654	0.237216	0.27599	0.30974	0.35453	0.387604	0.417906	0.442071	0.475594	0.534331	0.616033	0.706099	0.831828	1.00513	1.28369	1.80657	2.69688	3.28493	3.83501	4.60989	5.60327	7.12427	9.37619	12.9205	22.6418	68.6181
0.0502434	0.101479	0.146133	0.189115	0.238518	0.276061	0.310672	0.355011	0.38775	0.418098	0.44282	0.476779	0.537512	0.618606	0.706746	0.832069	1.00563	1.29234	1.80672	2.70004	3.30523	3.83686	4.63393	5.61326	7.13703	9.42085	13.0801	22.7913	68.9642
0.0502575	0.101585	0.14642	0.189452	0.239769	0.277137	0.3107	0.356423	0.388844	0.41897	0.443915	0.47721	0.53763	0.621814	0.707753	0.832384	1.01467	1.29849	1.80826	2.70533	3.30629	3.85072	4.65938	5.63999	7.15367	9.4428	13.1646	23.1363	69.561
0.0503627	0.101816	0.146992	0.190178	0.24104	0.277241	0.310989	0.356826	0.389008	0.418971	0.445485	0.478633	0.538107	0.622835	0.715009	0.832627	1.01467	1.30028	1.80846	2.71206	3.31899	3.86852	4.71102	5.67652	7.24336	9.49935	13.2134	23.4926	70.4795
0.0504167	0.101879	0.147289	0.190241	0.241453	0.277463	0.311336	0.356966	0.38915	0.419939	0.445732	0.478744	0.538802	0.623313	0.717979	0.832647	1.02354	1.30471	1.81028	2.71348	3.32123	3.88966	4.71137	5.69085	7.34168	9.51052	13.2526	23.6365	71.009
0.0509536	0.101914	0.14752	0.190306	0.242787	0.278477	0.31167	0.3571	0.390903	0.420027	0.445921	0.479029	0.539059	0.625103	0.719973	0.834269	1.031	1.3096	1.8212	2.71819	3.33511	3.90497	4.71573	5.73416	7.38903	9.5449	13.3013	23.7958	72.113
0.0510549	0.102001	0.147661	0.190619	0.243402	0.278532	0.312227	0.357163	0.391412	0.421362	0.446339	0.48287	0.540563	0.627445	0.721368	0.834985	1.03578	1.31772	1.82698	2.73109	3.33815	3.92921	4.73127	5.74512	7.39534	9.58503	13.3822	24.0965	72.7622
0.0511569	0.10208	0.147694	0.191168	0.24419	0.279488	0.312294	0.357337	0.392829	0.421539	0.446687	0.483788	0.540795	0.628986	0.724267	0.835246	1.04409	1.32278	1.83042	2.7313	3.34145	3.96234	4.75286	5.74512	7.48465	9.58503	13.5731	24.362	73.1149
0.0515008	0.102308	0.147782	0.192751	0.245006	0.279817	0.312617	0.357818	0.393045	0.421808	0.446996	0.484635	0.543603	0.629961	0.726691	0.836651	1.04728	1.33377	1.83303	2.73608	3.36717	3.96814	4.77668	5.74625	7.56326	9.59766	13.7571	24.6716	73.8185
0.0515114	0.102532	0.147903	0.192907	0.246094	0.279949	0.313242	0.358323	0.394487	0.423286	0.447041	0.484885	0.54426	0.631659	0.731238	0.84022	1.04821	1.33379	1.83397	2.7366	3.3738	3.97195	4.784	5.76616	7.67319	9.67098	13.8486	24.6957	74.7218
0.0515302	0.102597	0.148729	0.193813	0.246094	0.28016	0.315335	0.359523	0.394786	0.42353	0.447404	0.486317	0.54441	0.632858	0.731683	0.844794	1.04893	1.33476	1.83695	2.73977	3.3738	3.98211	4.83884	5.85749	7.70398	9.83214	14.0536	25.0021	75.2234
0.0515958	0.102687	0.148744	0.194129	0.246094	0.280218	0.316044	0.359793	0.395103	0.425963	0.447923	0.490561	0.544799	0.635515	0.7347	0.845329	1.0496	1.34414	1.84298	2.73977	3.38293	4.02599	4.84835	5.86347	7.74129	9.85209	14.1969	25.2531	75.7744
0.0516271	0.102779	0.149272	0.194241	0.246094	0.28126	0.317052	0.360447	0.395221	0.42599	0.451351	0.490629	0.546413	0.635562	0.735542	0.846626	1.05331	1.34452	1.84596	2.74202	3.41433	4.02783	4.84991	5.91137	7.7851	9.89546	14.199	25.3927	76.5001
0.0516599	0.102844	0.14947	0.194381	0.246094	0.281957	0.317795	0.361463	0.397117	0.426217	0.454849	0.491646	0.546744	0.635745	0.736227	0.853363	1.05447	1.34692	1.8618	2.74327	3.42769	4.07358	4.85328	5.97661	7.79361	9.97044	14.2211	25.5057	77.0938
0.0518427	0.103355	0.149477	0.194414	0.246094	0.283525	0.317924	0.362618	0.397123	0.427491	0.456792	0.492188	0.547218	0.639118	0.738281	0.854008	1.05642	1.34858	1.86596	2.75141	3.46323	4.10645	4.87241	5.9843	7.81711	9.97659	14.2749	25.6037	77.3099
0.051958	0.103359	0.149593	0.195219	0.246094	0.284236	0.318274	0.363867	0.397241	0.428209	0.457277	0.492188	0.550282	0.641537	0.738281	0.874179	1.05672	1.35443	1.87378	2.75141	3.47921	4.12857	4.90283	5.98885	7.92625	9.98829	14.6089	25.6142	77.8938
0.0522768	0.103974	0.149837	0.195636	0.246094	0.284477	0.318543	0.364049	0.397478	0.429044	0.458428	0.492188	0.550282	0.642993	0.739529	0.876343	1.05885	1.35515	1.87692	2.75436	3.48513	4.19874	4.92897	6.05639	8.01252	10.0257	14.6135	25.7576	81.1428
0.0523856	0.104055	0.150171	0.195846	0.246094	0.285688	0.318761	0.364405	0.397882	0.430445	0.459176	0.492188	0.551295	0.646468	0.741814	0.876437	1.06192	1.35748	1.87813	2.7633	3.56787	4.2101	4.98431	6.09299	8.03488	10.0351	14.671	25.7667	82.5818
0.0523984	0.104201	0.150351	0.196166	0.246094	0.285884	0.319555	0.365707	0.399787	0.43138	0.460758	0.492363	0.55208	0.647734	0.743546	0.876575	1.07132	1.35768	1.89448	2.76447	3.56789	4.214	5.00858	6.09299	8.05823	10.0759	14.8439	25.8583	86.3789
0.0524822	0.104792	0.150557	0.19629	0.246094	0.286327	0.320323	0.366056	0.400364	0.432329	0.464582	0.495175	0.55475	0.648257	0.743713	0.880104	1.07174	1.35902	1.89607	2.76993	3.58076	4.23396	5.03106	6.10384	8.08367	10.1964	15.0003	25.9408	87.6125
0.0525499	0.10495	0.150805	0.196344	0.246094	0.286838	0.320378	0.367811	0.400906	0.43293	0.464731	0.497603	0.55554	0.648725	0.746678	0.884974	1.0724	1.36248	1.90757	2.77122	3.59693	4.25444	5.07335	6.11629	8.20579	10.2292	15.1774	26.0654	89.6943
0.0526118	0.104982	0.150876	0.196451	0.246094	0.287569	0.320597	0.369141	0.402562	0.434001	0.467106	0.498613	0.564809	0.650808	0.759593	0.887304	1.07562	1.36342	1.92205	2.77778	3.60822	4.27717	5.08905	6.15726	8.25057	10.2358	15.5961	26.2036	90.7352
0.0526229	0.105273	0.151081	0.196513	0.246094	0.28836	0.322011	0.369314	0.404218	0.434206	0.467329	0.498726	0.564929	0.651507	0.759682	0.887304	1.07854	1.36752	1.92205	2.78059	3.61162	4.29784	5.08923	6.172	8.37978	10.2607	15.6317	26.2141	101.923
0.0526621	0.105536	0.151285	0.197028	0.246094	0.288728	0.32214	0.370816	0.405093	0.434975	0.467677	0.498944	0.565008	0.653904	0.759813	0.900572	1.07972	1.36838	1.92205	2.78413	3.6469	4.33822	5.09192	6.18104	8.49216	10.2683	15.6613	26.3374	102.805
0.0527724	0.107025	0.151723	0.197059	0.246094	0.288852	0.322612	0.371709	0.405217	0.435119	0.46828	0.500625	0.566869	0.656423	0.760104	0.905794	1.08402	1.36944	1.92205	2.79104	3.68748	4.34978	5.12746	6.21862	8.54268	10.3179	15.7243	26.3608	103.98
0.0528581	0.10814	0.151842	0.197101	0.246094	0.289112	0.32415	0.372122	0.406603	0.435165	0.468799	0.501734	0.567934	0.657465	0.762344	0.90627	1.08681	1.37228	1.92654	2.79667	3.69162	4.37394	5.13559	6.22069	8.58511	10.3562	15.8726	26.4298	105.944
0.0531308	0.108206	0.151883	0.197472	0.246094	0.289247	0.324208	0.372533	0.408329	0.437688	0.470223	0.502209	0.568142	0.659081	0.762368	0.910064	1.09448	1.37248	1.94091	2.8059	3.69199	4.40135	5.13613	6.26195	8.59555	10.448	15.9468	26.5282	127.667
0.0531308	0.108459	0.152194	0.198046	0.246361	0.289889	0.325926	0.372565	0.409496	0.437759	0.471484	0.502254	0.568963	0.659448	0.764208	0.914314	1.09926	1.37507	1.94711	2.8059	3.69274	4.40226	5.16971	6.27815	8.59569	10.5098	16.2238	26.6932	133.367
0.0532123	0.108532	0.152593	0.198598	0.248013	0.290549	0.325933	0.373007	0.410079	0.43819	0.471635	0.504159	0.570423	0.660155	0.765076	0.9195	1.0998	1.37545	1.9581	2.8059	3.72407	4.43652	5.19586	6.33068	8.63129	10.5849	16.4688	26.8453
0.0532746	0.108724	0.153025	0.198972	0.248047	0.290636	0.326992	0.37309	0.410119	0.438751	0.471738	0.504647	0.570962	0.660495	0.766136	0.919896	1.10435	1.37745	1.96875	2.81646	3.74025	4.45306	5.19711	6.36083	8.70834	10.6594	16.6007	27.0669
0.0533203	0.108858	0.153388	0.199314	0.248047	0.291159	0.327105	0.373941	0.410559	0.439014	0.472305	0.505454	0.571317	0.661362	0.767914	0.921963	1.1045	1.3863	1.98407	2.8219	3.74152	4.47249	5.20215	6.41734	8.72734	10.6779	16.799	27.1189
0.0537106	0.108979	0.153424	0.200109	0.248047	0.291299	0.328358	0.373948	0.411058	0.439168	0.473202	0.507752	0.572893	0.662865	0.771059	0.922369	1.10567	1.38682	1.98829	2.83119	3.79734	4.4765	5.27254	6.48545	8.7562	10.6959	16.8597	27.6695
0.0538181	0.109134	0.15463	0.200132	0.248047	0.29217	0.329311	0.373948	0.411993	0.439394	0.474404	0.507782	0.573216	0.664451	0.77184	0.923306	1.10642	1.39212	1.99094	2.83134	3.79996	4.51265	5.2806	6.49706	8.76944	10.7537	17.0786	27.6732
0.0540925	0.109153	0.154686	0.200368	0.249404	0.292781	0.330154	0.374297	0.412556	0.439786	0.476287	0.508681	0.57398	0.665593	0.77546	0.931598	1.11014	1.39228	1.99104	2.83822	3.80696	4.52438	5.35027	6.51225	8.84233	10.7566	17.1327	27.7067
0.054123	0.1092	0.155039	0.200531	0.249524	0.29285	0.330199	0.374479	0.413228	0.441028	0.476917	0.50888	0.575409	0.66832	0.776038	0.933068	1.11189	1.39232	1.99336	2.8543	3.85285	4.54006	5.36785	6.56844	8.85803	10.7636	17.1494	27.727
0.0545184	0.109498	0.155042	0.201247	0.249936	0.293251	0.330532	0.374779	0.413361	0.44107	0.476962	0.509664	0.576207	0.669496	0.778217	0.933603	1.11194	1.40182	1.99982	2.86992	3.8587	4.56957	5.37477	6.57791	8.87304	10.8579	17.2882	27.7434
0.0545726	0.109528	0.155702	0.201582	0.250691	0.295323	0.331167	0.374863	0.413382	0.442009	0.476966	0.51062	0.578325	0.680201	0.782705	0.935668	1.11315	1.4034	2.0127	2.87698	3.87403	4.61098	5.42305	6.62551	8.95795	10.8594	17.3315	28.1663
0.0545919	0.109596	0.15596	0.201992	0.251361	0.295919	0.332682	0.374915	0.414696	0.443531	0.478804	0.511542	0.580283	0.680855	0.783378	0.935725	1.11759	1.40367	2.01506	2.88045	3.9166	4.61797	5.44268	6.62628	8.99216	10.8812	17.3553	28.1983
0.0546178	0.110471	0.156316	0.202045	0.25152	0.295983	0.33316	0.375306	0.414872	0.444287	0.481217	0.511846	0.581856	0.682818	0.783715	0.935822	1.11939	1.40697	2.01916	2.88486	3.95021	4.63651	5.45533	6.64909	9.02105	10.9228	17.6164	28.5119
0.0546252	0.110598	0.156329	0.202073	0.251729	0.296053	0.333994	0.37543	0.415003	0.444862	0.4821	0.51325	0.583343	0.683831	0.78535	0.937342	1.12002	1.4085	2.01977	2.90584	3.95345	4.63728	5.47659	6.6503	9.04876	10.9974	17.639	28.5289
0.0546253	0.110857	0.156697	0.202221	0.252282	0.296888	0.3351	0.375773	0.416148	0.445496	0.482203	0.513838	0.583357	0.686286	0.790161	0.939384	1.12052	1.41115	2.02442	2.90719	3.96448	4.648	5.47822	6.72867	9.12292	11.0742	17.6635	28.6098
0.0547359	0.111129	0.157244	0.202486	0.252818	0.296959	0.336242	0.377636	0.417525	0.447164	0.484855	0.516479	0.584798	0.686675	0.791445	0.94261	1.12249	1.41442	2.04144	2.91156	3.97577	4.65934	5.48947	6.73779	9.15263	11.1424	17.6773	28.6803
0.0548234	0.111157	0.157665	0.20249	0.25357	0.297107	0.336629	0.378648	0.419397	0.448543	0.485858	0.516943	0.586685	0.687258	0.791581	0.947457	1.12551	1.41496	2.04652	2.91279	4.00151	4.66647	5.5149	6.73994	9.18685	11.2344	17.7205	29.0623
0.0549177	0.111195	0.158193	0.20252	0.253884	0.297417	0.33685	0.378819	0.419557	0.448668	0.486341	0.517882	0.589411	0.688966	0.791692	0.949473	1.12706	1.41501	2.04768	2.91781	4.00835	4.70206	5.52976	6.76497	9.23753	11.2443	17.7516	29.3192
0.0550014	0.111413	0.158229	0.202596	0.254845	0.297524	0.338565	0.378972	0.420044	0.449154	0.487676	0.519155	0.58998	0.691107	0.795043	0.954132	1.12933	1.42839	2.04963	2.93158	4.02051	4.70492	5.53377	6.80662	9.27679	11.4889	17.82	30.2344
0.0550432	0.111594	0.158323	0.204281	0.254969	0.298874	0.340471	0.380008	0.420399	0.44948	0.48772	0.51927	0.590553	0.69205	0.795468	0.956936	1.13388	1.43092	2.05517	2.9333	4.02879	4.75286	5.57416	6.8612	9.33282	11.5181	18.0726	30.41
0.0550674	0.11171	0.158344	0.205237	0.255459	0.299582	0.341558	0.380209	0.420702	0.449746	0.488921	0.52023	0.591986	0.692506	0.796141	0.957116	1.13477	1.43226	2.06545	2.9336	4.03091	4.7938	5.58169	6.90443	9.3425	11.569	18.3612	30.5919
0.0552552	0.111966	0.159123	0.205507	0.255495	0.299855	0.343735	0.381489	0.420902	0.450081	0.489719	0.52033	0.595391	0.692612	0.796679	0.962794	1.13514	1.43496	2.06931	2.9419	4.04316	4.80677	5.6118	6.97408	9.37097	11.5862	18.5291	31.105
0.055276	0.11234	0.159502	0.205534	0.255585	0.299884	0.344274	0.382171	0.421646	0.452358	0.491375	0.520886	0.595806	0.694005	0.799283	0.967476	1.14163	1.4354	2.07574	2.94428	4.05849	4.8366	5.62399	7.06233	9.37097	11.6681	18.5499	31.4003
0.055614	0.112827	0.159743	0.20663	0.257328	0.299904	0.344991	0.38279	0.423285	0.452605	0.49165	0.520915	0.597239	0.694373	0.799663	0.96766	1.14195	1.44401	2.08836	2.95717	4.06336	4.84095	5.66016	7.07496	9.39679	11.6702	18.6687	31.5087
0.0558402	0.113043	0.159779	0.206744	0.257723	0.300455	0.345254	0.383723	0.424192	0.452776	0.491684	0.522159	0.599307	0.696253	0.808354	0.971668	1.14305	1.45309	2.09461	2.96226	4.09979	4.87566	5.6722	7.11963	9.44643	11.6733	18.6853	31.5549
0.0559196	0.113462	0.15982	0.207606	0.258062	0.300564	0.34535	0.384812	0.427175	0.453971	0.492188	0.523087	0.599954	0.699785	0.810846	0.973482	1.14451	1.45838	2.10887	2.98763	4.11357	4.87923	5.67332	7.18002	9.46063	11.7224	18.7512	31.6564
0.0561804	0.113486	0.159908	0.207661	0.258128	0.303599	0.345542	0.385218	0.427521	0.454551	0.492188	0.524092	0.600386	0.702331	0.812172	0.978296	1.14897	1.46457	2.10973	2.99692	4.11953	4.88482	5.68152	7.20169	9.46742	11.7307	18.7823	31.8901
0.0562248	0.113588	0.159977	0.207857	0.258193	0.304524	0.34562	0.385627	0.428929	0.455449	0.492188	0.529126	0.6008	0.703043	0.812237	0.982713	1.16083	1.46915	2.11698	2.99995	4.1235	4.89165	5.69827	7.25186	9.46742	11.8866	18.829	32.3013
0.0565042	0.114489	0.159981	0.207896	0.258297	0.304686	0.345919	0.385761	0.429951	0.45554	0.492266	0.529299	0.60316	0.70847	0.813426	0.983464	1.16234	1.4692	2.11931	3.00179	4.1328	4.9004	5.7081	7.39387	9.4703	12.0004	18.8948	32.3353
0.0569081	0.114613	0.161164	0.208072	0.258736	0.304781	0.34665	0.386132	0.430087	0.457277	0.493386	0.530227	0.604546	0.713285	0.81424	0.984375	1.16254	1.47284	2.12446	3.0278	4.14259	4.91069	5.74102	7.44376	9.47061	12.0284	19.2085	32.3657
0.0570026	0.114817	0.161257	0.2082	0.258775	0.305664	0.347202	0.386467	0.430233	0.457718	0.494472	0.530301	0.606253	0.713332	0.815755	0.987993	1.17537	1.47727	2.13352	3.02976	4.15215	4.92111	5.76984	7.53304	9.47898	12.0328	19.3522	32.3837
0.0570313	0.114992	0.161271	0.208282	0.258891	0.306486	0.347259	0.386719	0.430346	0.458023	0.495139	0.532349	0.607981	0.715602	0.816171	0.989179	1.17588	1.48354	2.13797	3.03118	4.15748	4.92955	5.78231	7.54975	9.48678	12.0419	19.354	34.117
0.0571972	0.115221	0.161437	0.208328	0.259075	0.30725	0.347432	0.386978	0.431105	0.458774	0.495559	0.533859	0.610657	0.715813	0.816729	0.991743	1.17626	1.48404	2.14238	3.03277	4.16603	4.97694	5.80815	7.66455	9.49509	12.0422	19.3728	34.1712
0.0574062	0.115408	0.161551	0.208665	0.259346	0.307287	0.348029	0.38701	0.431207	0.459391	0.496395	0.53539	0.611967	0.715934	0.820119	0.992445	1.17892	1.48795	2.14788	3.03489	4.17007	4.98686	5.87826	7.70003	9.50572	12.1976	19.4601	34.2975
0.0575408	0.115423	0.162097	0.209001	0.259929	0.307492	0.348029	0.38722	0.431777	0.459938	0.497507	0.5359	0.614743	0.718144	0.823896	0.992466	1.1792	1.49467	2.14961	3.03608	4.18155	4.99376	5.88445	7.70378	9.51876	12.3268	19.5021	34.3936
0.0575523	0.115443	0.162406	0.209651	0.26031	0.308493	0.348029	0.387446	0.432103	0.460583	0.499227	0.53678	0.615563	0.722553	0.82439	0.994466	1.1853	1.49632	2.15617	3.04255	4.19083	5.00853	5.91137	7.70636	9.52896	12.3501	19.6965	34.4834
0.0575892	0.115939	0.162965	0.209842	0.260326	0.308656	0.348288	0.387531	0.432735	0.460612	0.499998	0.540648	0.616608	0.723189	0.826625	0.995689	1.18742	1.5008	2.1762	3.04398	4.29555	5.04397	5.92369	7.74772	9.54929	12.3583	19.7013	35.1283
0.0582075	0.116155	0.163389	0.210303	0.260647	0.309319	0.348808	0.388889	0.433289	0.461958	0.500851	0.540763	0.616641	0.723798	0.828401	0.996349	1.19383	1.5088	2.18054	3.04401	4.29784	5.04764	5.9573	7.7865	9.60045	12.4648	19.9397	35.4073
0.0582388	0.116491	0.163988	0.210542	0.260668	0.309331	0.349024	0.389484	0.434892	0.462055	0.501105	0.543365	0.619097	0.723965	0.832395	0.997271	1.19545	1.51528	2.18799	3.0447	4.31996	5.06806	5.96319	8.03274	9.61136	12.5302	20.0412	36.091
0.0582464	0.116567	0.163989	0.210682	0.26067	0.30942	0.349767	0.391063	0.434922	0.462644	0.502112	0.544195	0.621059	0.724423	0.838413	0.99905	1.20841	1.51677	2.1884	3.06996	4.33081	5.07781	5.98898	8.0822	9.64717	12.542	20.0487	36.5583
0.058263	0.11688	0.164424	0.210908	0.261488	0.309666	0.349922	0.391461	0.435957	0.462764	0.502536	0.544733	0.62178	0.729615	0.839626	1.00336	1.21399	1.52304	2.19322	3.07403	4.33614	5.08349	5.99044	8.15087	9.74148	12.6278	20.1006	37.7204
0.0582968	0.116955	0.164824	0.210996	0.262053	0.310108	0.350249	0.392414	0.435969	0.463269	0.503238	0.546019	0.623067	0.738281	0.840717	1.00642	1.21676	1.52997	2.21277	3.09182	4.34127	5.11553	6.06879	8.16385	9.76297	12.6652	20.1753	37.944
0.0584466	0.11705	0.164944	0.211081	0.262665	0.310126	0.351406	0.392647	0.436303	0.464203	0.505145	0.546119	0.623634	0.738281	0.841518	1.00767	1.21715	1.53281	2.213	3.10161	4.35225	5.13102	6.08483	8.20683	9.79295	12.6838	20.2037	38.0677
0.0585792	0.117226	0.165255	0.211322	0.262759	0.310185	0.353897	0.394205	0.436354	0.464377	0.505341	0.546287	0.62556	0.739799	0.842197	1.00904	1.21741	1.53954	2.2186	3.10484	4.38767	5.13326	6.13574	8.21022	9.80059	12.8063	20.2234	39.4252
0.058638	0.117484	0.166269	0.21179	0.263255	0.31048	0.354782	0.394651	0.437695	0.466332	0.505645	0.547824	0.625922	0.740972	0.844794	1.01107	1.21943	1.5401	2.2186	3.10802	4.40226	5.13826	6.14126	8.22483	9.8357	12.8465	20.3343	39.8648
0.058837	0.117565	0.16634	0.212002	0.263316	0.311127	0.356982	0.395191	0.439199	0.467859	0.508395	0.548332	0.626015	0.742546	0.850142	1.01109	1.22385	1.54113	2.2345	3.10911	4.41054	5.16259	6.15234	8.22528	9.84178	12.8465	20.371	40.1042
0.0589075	0.118085	0.166512	0.212065	0.264766	0.31248	0.357684	0.397302	0.439501	0.46921	0.509664	0.549902	0.626165	0.746689	0.852475	1.01382	1.22536	1.54123	2.2453	3.13177	4.43663	5.17382	6.21113	8.23415	9.85303	12.8771	20.7037	40.486
0.0593346	0.11879	0.166813	0.212407	0.265078	0.313279	0.357894	0.400005	0.439598	0.469275	0.510097	0.550282	0.629309	0.748347	0.852482	1.01467	1.22706	1.54214	2.24864	3.15195	4.44426	5.18085	6.23122	8.24876	9.89105	12.8864	20.7186	40.6589
0.0594428	0.118845	0.166875	0.212983	0.265723	0.313893	0.358065	0.400341	0.440029	0.46995	0.512145	0.551949	0.632858	0.752092	0.852534	1.0162	1.23047	1.54612	2.25598	3.18071	4.45695	5.20416	6.23244	8.26493	9.92036	12.9146	20.97	40.7347
0.0594933	0.119216	0.16794	0.213049	0.266656	0.315403	0.358152	0.400747	0.440043	0.470094	0.512237	0.553645	0.633772	0.753655	0.8528	1.02094	1.23063	1.54697	2.25766	3.18636	4.45841	5.21463	6.24552	8.32283	9.99335	13.0618	21.1448	40.9964
0.0595258	0.120196	0.168608	0.213359	0.26669	0.31571	0.358973	0.401111	0.440875	0.471029	0.513429	0.554876	0.635317	0.756376	0.865246	1.0235	1.23229	1.55395	2.26053	3.19914	4.47372	5.22164	6.30308	8.39076	9.99335	13.0764	21.3636	41.0591
0.0599314	0.120277	0.168827	0.213492	0.266711	0.315848	0.359277	0.401142	0.441285	0.47222	0.515231	0.558704	0.63627	0.760309	0.866477	1.03027	1.23391	1.55484	2.26887	3.20643	4.47431	5.24423	6.30308	8.3956	10.0176	13.1263	21.4143	41.2335
0.0600451	0.120666	0.169081	0.21351	0.267671	0.316562	0.360927	0.40166	0.44135	0.472331	0.515393	0.559845	0.637018	0.763393	0.866928	1.03133	1.2345	1.56322	2.28006	3.20867	4.52112	5.25013	6.30962	8.3997	10.0195	13.1631	21.4656	41.3877
0.0600791	0.120967	0.169234	0.213965	0.267886	0.317562	0.363339	0.401765	0.441397	0.474026	0.516182	0.560168	0.63942	0.764519	0.868604	1.03207	1.23681	1.56379	2.28118	3.21754	4.55421	5.29937	6.39844	8.4216	10.0515	13.2063	21.5687	41.8934
0.060186	0.120978	0.16928	0.214247	0.268432	0.317903	0.363342	0.401929	0.442811	0.47422	0.517447	0.560455	0.6408	0.765916	0.87199	1.03375	1.2406	1.57532	2.28688	3.22944	4.59741	5.31243	6.4147	8.438	10.0538	13.2173	21.6523	42.0285
0.060204	0.121342	0.169388	0.215057	0.268548	0.318159	0.36405	0.403193	0.445047	0.475174	0.519892	0.560471	0.641181	0.767205	0.87434	1.04085	1.24459	1.57577	2.28989	3.23993	4.62366	5.31508	6.4779	8.45315	10.0716	13.3935	21.6585	42.1111
0.0602063	0.121734	0.169453	0.215114	0.268621	0.318467	0.364303	0.403473	0.445115	0.475234	0.521274	0.560791	0.641415	0.767648	0.876228	1.04409	1.24695	1.57577	2.29621	3.27445	4.62368	5.3855	6.49463	8.54268	10.1798	13.8026	21.6839	42.3758
0.0603524	0.121976	0.169543	0.215307	0.268799	0.319764	0.36472	0.403507	0.445639	0.476878	0.521691	0.561006	0.641833	0.768229	0.876563	1.04537	1.25391	1.57577	2.31176	3.30169	4.66337	5.38617	6.50967	8.64626	10.1884	14.2984	21.8399	42.5237
0.0603597	0.122845	0.169673	0.215903	0.268977	0.321397	0.366317	0.404784	0.445851	0.478696	0.52292	0.56118	0.644722	0.768294	0.87818	1.04671	1.25484	1.58322	2.32328	3.30169	4.67782	5.39118	6.53428	8.69725	10.2642	14.4045	22.0061	43.5036
0.0604057	0.12286	0.169964	0.216253	0.269127	0.321853	0.366796	0.404973	0.44594	0.479323	0.523375	0.565663	0.645786	0.770577	0.87978	1.04728	1.25484	1.58573	2.33158	3.321	4.68225	5.39333	6.54428	8.70073	10.2772	14.4258	22.0439	44.168
0.0604751	0.123583	0.170222	0.21637	0.269181	0.32313	0.367075	0.405225	0.446482	0.479368	0.524025	0.569149	0.645907	0.77207	0.880378	1.05175	1.25484	1.58721	2.3343	3.32123	4.68225	5.40431	6.55262	8.70073	10.2998	14.4433	22.0534	44.6034
0.0607504	0.124237	0.170371	0.216612	0.269232	0.323755	0.368038	0.405952	0.446751	0.480066	0.525951	0.569245	0.645998	0.774242	0.881645	1.05378	1.25862	1.58775	2.33465	3.32392	4.68325	5.41406	6.61255	8.76315	10.325	14.5143	22.1896	46.2755
0.0607599	0.124312	0.170548	0.216803	0.269246	0.324361	0.36858	0.406823	0.447477	0.480352	0.52693	0.57316	0.647146	0.775891	0.882764	1.05813	1.26016	1.58976	2.33465	3.33713	4.6833	5.42498	6.61324	8.8217	10.3476	14.5383	22.2317	46.5735
0.0608026	0.124571	0.170982	0.216957	0.269526	0.32471	0.369901	0.40706	0.448292	0.48079	0.528203	0.574465	0.647153	0.776039	0.887304	1.06018	1.26062	1.59861	2.34136	3.34606	4.69141	5.43639	6.69393	8.83542	10.464	14.6149	22.2589	46.8594
0.0608779	0.12476	0.171286	0.217393	0.269738	0.324921	0.369955	0.408445	0.449112	0.481352	0.528665	0.57569	0.649252	0.778217	0.892761	1.06677	1.26206	1.60992	2.34459	3.36245	4.70161	5.44116	6.72735	8.87645	10.4698	14.6997	22.4067	46.9259
0.0610801	0.125103	0.171663	0.218105	0.270041	0.325447	0.370067	0.409421	0.449641	0.481767	0.529912	0.57627	0.650238	0.778217	0.892803	1.06702	1.26545	1.61103	2.35318	3.39816	4.71226	5.44752	6.75647	8.89008	10.5169	14.7204	22.4601	47.3275
0.0611914	0.125117	0.171882	0.218327	0.270506	0.326966	0.371962	0.409493	0.450618	0.482501	0.530282	0.577423	0.654248	0.778217	0.895725	1.06862	1.2661	1.61624	2.35318	3.41616	4.73371	5.45121	6.80588	8.91314	10.5251	14.8033	22.5251	47.5088
0.0612642	0.125451	0.172229	0.218567	0.271073	0.327059	0.373855	0.409635	0.450649	0.483144	0.531192	0.578215	0.655967	0.778359	0.898402	1.0708	1.26662	1.64935	2.3657	3.44736	4.747	5.47025	6.88863	8.91342	10.5935	14.8353	22.6801	48.5429
0.0614157	0.125736	0.172841	0.220551	0.271906	0.327408	0.374702	0.409924	0.451727	0.483504	0.531894	0.579192	0.657363	0.779189	0.90627	1.07536	1.26746	1.6498	2.36712	3.45489	4.74706	5.47453	6.93006	8.93284	10.5935	14.9467	22.8656	49.8162
0.0616771	0.126078	0.172921	0.221185	0.272358	0.328744	0.374954	0.409984	0.452605	0.484109	0.533271	0.580106	0.658494	0.77925	0.911035	1.07575	1.26911	1.65085	2.37141	3.45489	4.75846	5.50254	6.93227	9.04876	10.6093	14.989	22.9079	50.311
0.0617535	0.126162	0.172977	0.221706	0.273664	0.330312	0.375646	0.410907	0.453206	0.484239	0.534045	0.580217	0.659761	0.782938	0.912628	1.07823	1.26954	1.65085	2.37426	3.47278	4.76496	5.53027	6.99255	9.12817	10.6515	15.3577	22.9255	50.6111
0.0617618	0.126382	0.173388	0.221842	0.273893	0.330778	0.376868	0.411079	0.454556	0.484243	0.535425	0.581663	0.660588	0.787033	0.916859	1.07861	1.27092	1.65085	2.3749	3.48985	4.81421	5.56907	6.9953	9.13203	10.7213	15.5746	23.187	50.8099
0.061851	0.126653	0.173575	0.222479	0.27551	0.330907	0.377203	0.411665	0.455294	0.484268	0.535717	0.582594	0.661854	0.787119	0.9188	1.08123	1.27137	1.65088	2.38571	3.50186	4.82339	5.59364	7.02125	9.15522	10.7333	15.8235	23.4616	51.058
0.0619517	0.126754	0.174065	0.223079	0.275619	0.330913	0.377649	0.411788	0.456572	0.484617	0.536034	0.582919	0.662398	0.787219	0.918928	1.08336	1.27158	1.65109	2.38756	3.56065	4.86945	5.60093	7.02338	9.15537	10.7728	15.8404	23.4926	52.1771
0.062411	0.12687	0.174522	0.223258	0.276054	0.331269	0.37824	0.412802	0.457461	0.484645	0.538084	0.584126	0.663946	0.790898	0.919896	1.08438	1.27191	1.65174	2.39396	3.58318	4.8876	5.65139	7.0335	9.15852	10.7861	15.8489	23.6685	52.8346
0.0625532	0.127151	0.17465	0.223391	0.27726	0.333854	0.380187	0.413228	0.457729	0.485784	0.53883	0.584423	0.666195	0.791448	0.919979	1.09615	1.28082	1.65592	2.40117	3.61587	4.89941	5.65477	7.03912	9.16482	10.7939	15.853	23.7098	53.4165
0.062728	0.127152	0.17476	0.223518	0.27733	0.335003	0.380483	0.413273	0.457938	0.486674	0.539349	0.584813	0.668418	0.792545	0.920784	1.09704	1.28124	1.65741	2.40426	3.64732	4.90963	5.74512	7.15367	9.16586	10.8299	16.2047	23.7742	53.9305
0.0627728	0.127397	0.175049	0.22354	0.277457	0.335462	0.383566	0.413588	0.458027	0.488167	0.53969	0.585119	0.669051	0.793395	0.925572	1.09973	1.28754	1.65789	2.40756	3.64962	4.91237	5.76616	7.1748	9.18823	10.8309	16.3636	23.9054	54.5002
0.0629299	0.127814	0.175271	0.223748	0.277758	0.335817	0.383798	0.413774	0.458447	0.48828	0.543142	0.586395	0.669139	0.795291	0.926522	1.10149	1.29339	1.66566	2.40939	3.67176	4.91975	5.80812	7.21222	9.2247	10.8508	16.3907	24.0682	55.0653
0.0629724	0.128065	0.176395	0.224163	0.27776	0.335845	0.383817	0.413813	0.461171	0.489558	0.545833	0.587045	0.669248	0.797982	0.926658	1.10182	1.29505	1.66567	2.41068	3.68748	4.92935	5.85625	7.27123	9.23753	10.8951	16.5237	24.6157	57.3764
0.0630272	0.128256	0.176609	0.225026	0.278059	0.336971	0.384015	0.41386	0.461487	0.489765	0.545914	0.588523	0.671569	0.798477	0.929478	1.10399	1.29512	1.66747	2.41499	3.72584	4.93831	5.87025	7.27565	9.26709	10.9293	16.5583	24.6478	57.4512
0.063179	0.128586	0.176804	0.225038	0.278132	0.338558	0.384581	0.414691	0.461652	0.490033	0.546708	0.588659	0.671896	0.799005	0.934133	1.10623	1.29533	1.68044	2.41999	3.74839	4.9467	5.87085	7.28959	9.27141	10.9694	16.5954	24.7195	57.7761
0.0632247	0.12865	0.176828	0.225412	0.279263	0.339647	0.385664	0.414716	0.462117	0.490718	0.547047	0.591553	0.674395	0.802802	0.935963	1.10692	1.30007	1.68527	2.421	3.76499	4.9853	5.87278	7.30956	9.27316	10.9854	16.6112	24.7667	57.7944
0.0632286	0.128706	0.177259	0.225608	0.27937	0.340304	0.386099	0.414729	0.462389	0.492179	0.548291	0.591867	0.676838	0.803075	0.936025	1.11342	1.30028	1.6905	2.43047	3.76978	5.01447	5.90354	7.34577	9.27679	11.0022	16.8314	24.7675	58.8352
0.0632472	0.128768	0.177521	0.225813	0.282536	0.340928	0.386249	0.41482	0.46253	0.492188	0.548299	0.591983	0.676899	0.803824	0.936574	1.11406	1.30192	1.6965	2.44298	3.78521	5.01744	5.91539	7.34597	9.28402	11.0523	16.9637	24.8981	58.8656
0.0633093	0.129161	0.177741	0.225822	0.282746	0.341102	0.386755	0.417569	0.464911	0.492188	0.548713	0.592191	0.678207	0.808803	0.938013	1.11693	1.30241	1.70214	2.44298	3.82675	5.01781	5.99445	7.34883	9.30128	11.1193	17.0953	24.9066	59.1494
0.0634288	0.129212	0.177993	0.225829	0.283324	0.341304	0.38687	0.418762	0.465183	0.492495	0.548794	0.592329	0.679751	0.810068	0.938919	1.12291	1.30428	1.71149	2.4713	3.82926	5.01935	6.00867	7.35133	9.3243	11.1226	17.1507	24.9485	60.3887
0.0634479	0.129385	0.178122	0.226221	0.283792	0.341968	0.387585	0.41891	0.465257	0.492987	0.550282	0.593353	0.680487	0.810444	0.943853	1.12444	1.30628	1.71263	2.47321	3.83721	5.04492	6.01324	7.35197	9.35333	11.1849	17.1808	25.0112	60.4058
0.0636603	0.129468	0.178315	0.226607	0.283811	0.342221	0.387645	0.419415	0.465317	0.493078	0.550282	0.594913	0.680745	0.811279	0.943916	1.1286	1.30631	1.71401	2.48047	3.84374	5.06722	6.04556	7.42913	9.38738	11.1858	17.2965	25.0949	60.5396
0.0638011	0.129731	0.179113	0.226627	0.284087	0.342233	0.388104	0.419534	0.465881	0.493195	0.550282	0.596049	0.680959	0.81511	0.945635	1.14427	1.30803	1.71492	2.48408	3.85137	5.06979	6.10143	7.45771	9.39679	11.2468	17.3046	25.2632	60.6336
0.063922	0.129806	0.179445	0.226827	0.284165	0.342658	0.388687	0.419841	0.468212	0.493763	0.550758	0.598035	0.681785	0.817383	0.945648	1.14491	1.30894	1.72164	2.49006	3.85447	5.07335	6.1286	7.51483	9.3986	11.2908	17.3655	25.27	60.8577
0.0641814	0.129941	0.17968	0.227275	0.284837	0.342722	0.38892	0.420294	0.468787	0.494105	0.550804	0.59807	0.681959	0.817426	0.945869	1.14774	1.30908	1.72266	2.49446	3.86101	5.08287	6.13737	7.57566	9.4196	11.2935	17.618	25.4408	61.0933
0.0644259	0.129977	0.179893	0.228961	0.284857	0.343671	0.390095	0.420365	0.469028	0.494497	0.552409	0.599599	0.685463	0.821655	0.947382	1.15085	1.31959	1.72606	2.4957	3.87462	5.11333	6.13981	7.60885	9.46723	11.3132	17.6486	25.669	61.2689
0.064539	0.130572	0.17991	0.22948	0.284877	0.345497	0.390155	0.421028	0.470146	0.494669	0.55281	0.604054	0.685642	0.823545	0.951615	1.15194	1.322	1.72621	2.49661	3.87592	5.12939	6.15234	7.60983	9.46742	11.3763	17.665	25.6857	61.5594
0.0645537	0.131062	0.179918	0.229622	0.28525	0.345524	0.390746	0.421602	0.470323	0.494798	0.554382	0.605133	0.690385	0.824687	0.953668	1.15496	1.32526	1.72962	2.50352	3.87696	5.13859	6.17433	7.6104	9.55655	11.5016	17.7205	25.8449	61.8668
0.0647831	0.131547	0.18035	0.229691	0.285464	0.345794	0.392957	0.424261	0.4705	0.49574	0.554997	0.605662	0.692416	0.826182	0.953978	1.15759	1.32563	1.74015	2.50443	3.89108	5.15835	6.18411	7.61766	9.5573	11.5323	17.8956	25.8778	61.8944
0.0648798	0.132028	0.180663	0.230145	0.286144	0.345835	0.394041	0.42556	0.47059	0.496459	0.55827	0.606556	0.695562	0.82712	0.954731	1.15799	1.32602	1.74234	2.5086	3.91325	5.16119	6.21113	7.69215	9.55957	11.5993	17.9243	25.9783	61.9242
0.0650134	0.132052	0.181005	0.230198	0.286713	0.346163	0.394767	0.425625	0.471734	0.496559	0.560033	0.606723	0.696058	0.827654	0.96062	1.16259	1.32703	1.75575	2.51824	3.93599	5.19124	6.2258	7.7275	9.57339	11.616	18.0254	25.9848	61.958
0.0651068	0.132087	0.181799	0.23021	0.286948	0.346592	0.395438	0.427351	0.472688	0.498719	0.560359	0.60994	0.696058	0.833204	0.964376	1.16259	1.32756	1.75774	2.52959	3.93753	5.21921	6.23452	7.82064	9.57555	11.6707	18.0254	26.0356	62.3244
0.0651644	0.132164	0.18268	0.230592	0.287346	0.34689	0.396145	0.428198	0.473771	0.498839	0.562267	0.610845	0.696058	0.834161	0.97161	1.16524	1.3305	1.75818	2.52959	3.94402	5.22044	6.26046	7.84804	9.59766	11.7752	18.1187	26.1648	62.8503
0.0655982	0.132175	0.182874	0.230899	0.287705	0.347112	0.396412	0.428229	0.474316	0.500476	0.562286	0.61218	0.69635	0.834255	0.977049	1.16969	1.33072	1.76675	2.52959	3.95027	5.24845	6.27418	7.87884	9.60119	11.7803	18.1561	26.1767	63.1829
0.0656666	0.132366	0.183201	0.231475	0.287723	0.347488	0.396423	0.429276	0.474363	0.502614	0.563157	0.613587	0.702113	0.835657	0.977246	1.17057	1.33307	1.77461	2.54116	3.95279	5.25236	6.31423	7.92964	9.65114	11.7826	18.181	26.3625	64.4046
0.0657458	0.132429	0.183743	0.231608	0.287982	0.347901	0.396873	0.42932	0.474505	0.502988	0.56457	0.616768	0.702199	0.835761	0.978296	1.17426	1.33336	1.77708	2.54741	3.96772	5.32303	6.32548	7.99965	9.66093	11.9715	18.3942	26.534	64.5334
0.0657792	0.132486	0.183873	0.231746	0.288045	0.348025	0.396882	0.43007	0.476253	0.50305	0.566766	0.618562	0.703115	0.836564	0.983113	1.18573	1.34104	1.7774	2.5538	3.96788	5.32336	6.34208	8.01178	9.68834	12.1807	18.3943	26.5416	65.024
0.0658005	0.132623	0.184016	0.232423	0.288395	0.348029	0.398337	0.43079	0.476793	0.504322	0.567466	0.618978	0.703437	0.839291	0.984375	1.19	1.3431	1.77741	2.5538	3.97283	5.32452	6.3827	8.04104	9.69524	12.1827	18.471	26.6309	65.5832
0.0659848	0.132858	0.1846	0.232726	0.288548	0.348029	0.39993	0.430908	0.477219	0.50456	0.568093	0.622148	0.707092	0.841763	0.987273	1.19075	1.34495	1.78044	2.56676	3.98236	5.33712	6.40156	8.07308	9.70801	12.2183	18.6334	26.7238	65.795
0.0661718	0.133631	0.184687	0.233285	0.289867	0.348029	0.400349	0.43145	0.478032	0.505011	0.569331	0.623791	0.709907	0.844563	0.990848	1.1958	1.34761	1.78281	2.56745	3.9902	5.35193	6.41667	8.13569	9.71521	12.35	18.6522	27.2024	66.097
0.0665424	0.134083	0.184703	0.233723	0.29065	0.348029	0.400433	0.431762	0.480489	0.505218	0.569638	0.62722	0.712035	0.844565	0.991663	1.19652	1.36213	1.78291	2.56929	3.99519	5.36485	6.42613	8.22483	9.7288	12.3627	18.7077	27.2957	66.2573
0.0666315	0.134935	0.184895	0.2347	0.290778	0.348029	0.400648	0.4329	0.481217	0.512561	0.57097	0.627879	0.714124	0.844794	0.992315	1.19661	1.36348	1.78641	2.56929	4.00438	5.37664	6.55273	8.2689	9.73549	12.3654	18.7236	27.356	66.6614
0.0666338	0.135044	0.185261	0.236337	0.291018	0.348029	0.401655	0.433144	0.48127	0.513291	0.572024	0.629306	0.720166	0.845701	0.995689	1.1979	1.364	1.78664	2.57134	4.00612	5.38576	6.55275	8.27491	9.73549	12.4539	18.7883	27.4575	66.8225
0.0666597	0.135352	0.18572	0.236732	0.291614	0.349388	0.401794	0.43376	0.48176	0.514762	0.572126	0.629384	0.720167	0.846066	0.999302	1.20026	1.3642	1.79159	2.57552	4.0563	5.39181	6.55275	8.35158	9.73617	12.5619	18.8004	27.5751	68.051
0.0669413	0.135441	0.185921	0.237028	0.291821	0.350791	0.402372	0.43567	0.481913	0.514914	0.573194	0.629998	0.720517	0.846397	1.0024	1.20053	1.36766	1.79607	2.58198	4.05868	5.41965	6.57344	8.37442	9.7975	12.6078	18.8451	27.611	69.3334
0.0669894	0.135825	0.186074	0.237092	0.292044	0.352002	0.402399	0.436799	0.482086	0.515857	0.573831	0.630846	0.722539	0.847421	1.00263	1.20132	1.36938	1.79959	2.58413	4.05868	5.41965	6.6304	8.38165	9.85963	12.6121	19.1653	27.627	69.561
0.067049	0.13586	0.186201	0.237865	0.292928	0.352214	0.402782	0.436873	0.484009	0.517347	0.577842	0.633327	0.724184	0.849186	1.00293	1.20661	1.37546	1.80848	2.58972	4.07525	5.43232	6.68157	8.39076	9.86643	12.6613	19.2599	27.7525	69.9638
0.0671008	0.136135	0.186358	0.238663	0.293053	0.352989	0.402879	0.437036	0.484102	0.518487	0.577908	0.634806	0.725291	0.852475	1.0036	1.2072	1.37595	1.81331	2.60213	4.07543	5.43542	6.71454	8.40329	9.8714	12.7341	19.4768	27.8619	70.7699
0.0671939	0.136389	0.186515	0.23906	0.293227	0.353477	0.403093	0.437369	0.485455	0.520625	0.57909	0.635187	0.725414	0.853297	1.00504	1.2099	1.37816	1.81347	2.61527	4.09731	5.44927	6.73831	8.41012	9.89897	12.8216	19.4927	28.3368	70.8967
0.0672814	0.1364	0.186745	0.239165	0.293673	0.353648	0.403433	0.439534	0.487164	0.521097	0.579928	0.635483	0.728551	0.854295	1.00803	1.21158	1.38468	1.8158	2.61888	4.09763	5.45895	6.7386	8.4251	9.92036	12.9984	19.5176	28.4994	71.2915
0.067283	0.136685	0.186971	0.239232	0.293701	0.353728	0.403948	0.441646	0.487295	0.521171	0.580087	0.635684	0.729403	0.854614	1.01007	1.21213	1.39129	1.81657	2.6235	4.10238	5.53053	6.74448	8.44128	9.93256	13.0283	19.5393	28.637	71.4632
0.0673169	0.13678	0.187082	0.239649	0.293751	0.353824	0.403992	0.444048	0.488129	0.521674	0.580361	0.635797	0.730512	0.857533	1.01125	1.21282	1.39578	1.81704	2.62647	4.12528	5.56847	6.78357	8.57099	9.95325	13.095	19.5408	29.1838	71.6752
0.0673916	0.137099	0.187126	0.23986	0.294263	0.354447	0.405811	0.444498	0.488734	0.524705	0.581552	0.637243	0.735799	0.858144	1.01621	1.21317	1.40085	1.82919	2.63614	4.15031	5.6109	6.7888	8.63919	10.0063	13.177	19.6043	29.3115	72.3356
0.0674805	0.137142	0.187213	0.239895	0.294547	0.354564	0.406323	0.444721	0.489124	0.525542	0.581731	0.638072	0.736965	0.860652	1.01836	1.21597	1.40266	1.83379	2.64057	4.15065	5.63385	6.7888	8.64655	10.0249	13.2297	19.6305	29.3629	72.3581
0.0676538	0.137306	0.187303	0.240925	0.295178	0.355601	0.406694	0.444931	0.489285	0.526621	0.582069	0.63907	0.737848	0.861584	1.01971	1.21796	1.4052	1.83426	2.64891	4.15588	5.63489	6.79588	8.66935	10.0391	13.316	19.6506	29.4675	72.4223
0.0676678	0.137451	0.187551	0.241081	0.295762	0.356258	0.407264	0.445205	0.489333	0.526817	0.583139	0.639987	0.738281	0.863386	1.02519	1.21997	1.40641	1.84522	2.65362	4.17616	5.6655	6.80084	8.70073	10.0634	13.3391	19.6506	29.5653	73.4076
0.0676784	0.13755	0.188044	0.241362	0.295832	0.357722	0.407358	0.445728	0.489765	0.52693	0.584715	0.64078	0.739837	0.863841	1.02689	1.2218	1.4108	1.84526	2.65724	4.19083	5.66636	6.80598	8.70073	10.1168	13.4273	19.7127	29.6417	73.4711
0.0678444	0.137571	0.188108	0.241861	0.29645	0.358146	0.407639	0.446961	0.4901	0.527066	0.584813	0.640839	0.740244	0.866401	1.03314	1.22313	1.41249	1.84621	2.66042	4.20482	5.67376	6.81314	8.70769	10.1232	13.4341	19.8864	29.7174	73.9906
0.0679549	0.138142	0.188525	0.241961	0.296646	0.358502	0.409126	0.44821	0.490271	0.527204	0.585074	0.642555	0.740411	0.868134	1.03445	1.2238	1.41251	1.85123	2.66191	4.27161	5.71896	6.83124	8.72853	10.1884	13.5826	19.9111	29.746	74.176
0.068005	0.138173	0.188673	0.242071	0.296671	0.35874	0.409146	0.448234	0.490309	0.52841	0.585171	0.643038	0.74132	0.868604	1.03508	1.22454	1.41352	1.85214	2.66191	4.27617	5.72847	6.84211	8.8217	10.2358	13.9515	19.9475	30.1836	75.3606
0.0680221	0.138685	0.188842	0.242158	0.297232	0.358798	0.40942	0.448435	0.491468	0.528501	0.587545	0.64471	0.742477	0.86985	1.03567	1.22517	1.41611	1.87394	2.67801	4.27854	5.72922	6.84231	8.86155	10.2358	14.0222	20.3322	30.1882	77.0429
0.0680433	0.13882	0.189143	0.242322	0.297471	0.359506	0.409487	0.449397	0.492188	0.529576	0.589034	0.646189	0.743247	0.872599	1.03644	1.22766	1.41657	1.87419	2.67883	4.2872	5.74294	6.84611	8.86173	10.3032	14.0769	20.3534	30.3112	77.6054
0.068093	0.138876	0.18916	0.243	0.298188	0.35979	0.409701	0.451391	0.492188	0.529703	0.589247	0.646468	0.743301	0.874165	1.03707	1.22773	1.42269	1.87704	2.68428	4.29784	5.83403	6.87412	8.86633	10.3382	14.097	20.3696	30.4216	78.7965
0.068622	0.139412	0.189276	0.243136	0.298263	0.360234	0.411149	0.451566	0.492572	0.532433	0.591005	0.64828	0.744435	0.87434	1.03996	1.22846	1.43496	1.89285	2.6951	4.29886	5.84382	6.89935	8.87645	10.3476	14.2819	20.427	30.9357	80.1075
0.0687603	0.139595	0.189392	0.243333	0.298617	0.360673	0.41212	0.451723	0.492675	0.532611	0.591148	0.650238	0.744763	0.874559	1.04061	1.23005	1.43496	1.90707	2.69663	4.33166	5.85071	6.93212	8.89008	10.3679	14.3435	20.5066	31.0487	81.0499
0.068773	0.139982	0.189765	0.243689	0.29914	0.361071	0.412618	0.452523	0.492939	0.532708	0.591477	0.650363	0.74548	0.876331	1.04225	1.23047	1.43496	1.90721	2.70055	4.33616	5.869	6.99812	8.90312	10.4698	14.3447	20.5206	31.3195	82.2729
0.0688306	0.140026	0.190015	0.245645	0.299483	0.361921	0.412824	0.452894	0.492998	0.534045	0.591867	0.650452	0.747176	0.876814	1.04498	1.23129	1.4403	1.90753	2.7013	4.35451	5.87548	7.01185	8.92069	10.4698	14.3523	20.5379	31.5403	82.8667
0.0691337	0.14009	0.191002	0.245725	0.299803	0.362851	0.413594	0.453032	0.493502	0.535466	0.592273	0.650749	0.748222	0.877596	1.04682	1.23403	1.44334	1.91203	2.70402	4.36042	5.88528	7.04782	8.97495	10.4866	14.368	20.565	31.5493	84.4804
0.0691566	0.140174	0.191082	0.246058	0.29997	0.363106	0.413745	0.453104	0.493524	0.535958	0.592606	0.658016	0.750007	0.878533	1.05153	1.23436	1.45062	1.92072	2.70403	4.36227	5.88748	7.0951	9.00953	10.4971	14.375	20.5689	31.7012	86.3512
0.0692206	0.140264	0.19114	0.246094	0.300042	0.363262	0.413755	0.453508	0.495056	0.537691	0.595237	0.658953	0.751941	0.880378	1.05481	1.23662	1.45111	1.9253	2.70532	4.38319	5.90561	7.10506	9.01882	10.6277	14.4008	20.6203	32.4379	87.8944
0.06937	0.140643	0.191629	0.246094	0.300159	0.363656	0.415618	0.454069	0.495646	0.537738	0.595437	0.659023	0.752199	0.880581	1.05979	1.23856	1.45318	1.92702	2.70734	4.39777	5.91118	7.11358	9.08482	10.6743	14.4463	20.6457	32.5328	88.1284
0.0693744	0.141091	0.192612	0.246094	0.300883	0.364464	0.416045	0.45435	0.495685	0.5395	0.595736	0.66074	0.752307	0.882303	1.06222	1.23947	1.45642	1.92774	2.71454	4.40226	5.92663	7.1172	9.10731	10.6846	14.5466	20.7331	32.5549	92.1617
0.0695251	0.141109	0.193561	0.246094	0.301521	0.364508	0.41668	0.454813	0.49577	0.539916	0.596001	0.661096	0.752578	0.885035	1.06264	1.24209	1.45788	1.92799	2.71692	4.41294	6.00315	7.16636	9.14529	10.6859	14.6078	20.8235	32.5855	94.9935
0.0696426	0.141159	0.193931	0.246094	0.301732	0.364597	0.417226	0.454909	0.496018	0.541262	0.596771	0.661866	0.753269	0.885647	1.06417	1.24648	1.45796	1.93388	2.71989	4.43475	6.00791	7.1707	9.18823	10.689	14.7204	20.9727	33.2735	98.1319
0.0697048	0.141392	0.194045	0.246094	0.3025	0.364714	0.417414	0.456653	0.496094	0.541492	0.597324	0.662028	0.753613	0.887304	1.06417	1.24651	1.458	1.93899	2.72359	4.49596	6.00791	7.18745	9.19815	10.6931	15.0998	20.9957	33.8361	99.7976
0.0697909	0.141509	0.194138	0.246094	0.302837	0.36472	0.417736	0.456915	0.496811	0.543018	0.598507	0.663309	0.755448	0.887304	1.06631	1.25155	1.46885	1.93945	2.73492	4.49614	6.02263	7.27289	9.20775	10.7244	15.3052	21.1211	34.3473	100.395
0.0700036	0.141955	0.195202	0.246094	0.302886	0.364774	0.41823	0.457613	0.499283	0.543625	0.599082	0.663418	0.755466	0.887304	1.06679	1.25279	1.47068	1.93987	2.74581	4.49641	6.06477	7.28147	9.21437	10.7259	15.3682	21.1415	34.4927	101.531
0.0700342	0.142138	0.19521	0.246094	0.303656	0.365261	0.418804	0.459199	0.499373	0.543633	0.599894	0.664155	0.758825	0.887304	1.07132	1.25484	1.47127	1.94054	2.74636	4.51326	6.07192	7.31421	9.23089	10.9311	15.4373	21.1893	34.5979	101.588
0.0700635	0.14215	0.195549	0.246094	0.304363	0.365351	0.420065	0.460161	0.49938	0.543993	0.600744	0.665282	0.760466	0.887304	1.07253	1.25484	1.47276	1.95629	2.75141	4.52438	6.08492	7.31689	9.26372	10.9475	15.6789	21.3468	34.6531	101.941
0.0702032	0.142214	0.195585	0.246094	0.30499	0.366524	0.420284	0.46152	0.503517	0.544871	0.602228	0.665644	0.761119	0.887499	1.07471	1.25518	1.47374	1.95766	2.7645	4.53774	6.10044	7.32935	9.26591	10.9607	15.721	21.3689	34.6986	122.273
0.0703519	0.142408	0.195716	0.246094	0.305104	0.366597	0.4203	0.462245	0.503759	0.545051	0.60228	0.667018	0.762496	0.887727	1.08189	1.25533	1.47656	1.96599	2.76495	4.54398	6.10816	7.38281	9.26699	10.9753	15.8208	21.4662	35.2835	127.093
0.0704448	0.142422	0.196351	0.246094	0.305564	0.367154	0.421803	0.462754	0.505812	0.54525	0.602369	0.669804	0.763485	0.888645	1.08232	1.25682	1.47733	1.96838	2.76574	4.55156	6.12439	7.38281	9.28158	11.0448	15.8358	21.5195	35.9164	132.552
0.0706032	0.142965	0.196444	0.246094	0.306359	0.368191	0.422092	0.464484	0.506319	0.546267	0.602784	0.673885	0.764705	0.88888	1.08329	1.25723	1.48278	1.96875	2.76681	4.55737	6.14157	7.40632	9.30103	11.0581	15.8617	21.6618	36.0373
0.0706306	0.14336	0.197345	0.246094	0.30689	0.368517	0.422106	0.465211	0.506488	0.546298	0.602874	0.677577	0.767623	0.89231	1.08361	1.25899	1.48536	1.97885	2.77197	4.56411	6.15983	7.49191	9.30286	11.1257	16.0131	21.6912	36.2803
0.0706787	0.143424	0.197511	0.246094	0.306959	0.368828	0.422809	0.465274	0.506964	0.54646	0.603926	0.678014	0.773196	0.894486	1.08423	1.26011	1.48578	1.98407	2.78514	4.601	6.172	7.50081	9.31723	11.1983	16.0131	21.7557	36.3128
0.0709504	0.143514	0.197605	0.246094	0.307038	0.369084	0.423498	0.466142	0.507342	0.549348	0.607354	0.680244	0.775659	0.902264	1.08485	1.26395	1.48712	1.98407	2.78809	4.62368	6.17815	7.5094	9.33098	11.2102	16.0698	21.808	37.1784
0.0709982	0.14354	0.197749	0.246094	0.307275	0.369141	0.423539	0.466355	0.507625	0.550272	0.607439	0.680833	0.77602	0.904154	1.08514	1.26421	1.49246	1.98407	2.79144	4.65067	6.20035	7.53921	9.3386	11.2546	16.1224	21.9331	37.3325
0.0710397	0.143621	0.198015	0.246094	0.307617	0.370246	0.423622	0.466645	0.508789	0.550602	0.607548	0.681785	0.776372	0.907379	1.08639	1.26953	1.49311	1.98922	2.79398	4.66688	6.23744	7.54186	9.3386	11.2952	16.1318	21.945	37.8504
0.071154	0.143641	0.198272	0.246094	0.310439	0.370751	0.423813	0.467139	0.50957	0.550804	0.608051	0.684722	0.776523	0.915931	1.08759	1.26976	1.49693	1.99001	2.79726	4.66695	6.26406	7.60247	9.36451	11.3035	16.3705	22.1277	37.8577
0.0712803	0.143686	0.198606	0.246094	0.310755	0.370833	0.424181	0.467778	0.509636	0.551469	0.611113	0.686107	0.777463	0.918746	1.08848	1.27081	1.49693	1.99582	2.80424	4.67786	6.27725	7.66566	9.37097	11.323	16.3722	22.1826	38.0553
0.0713221	0.143902	0.198718	0.246094	0.311281	0.371475	0.42423	0.469536	0.510612	0.551477	0.611534	0.688545	0.777913	0.919552	1.0964	1.27221	1.49693	1.99982	2.8045	4.70161	6.31336	7.70395	9.39679	11.379	16.4049	22.2612	38.0603
0.0713281	0.14405	0.198942	0.246094	0.311645	0.37182	0.42429	0.46958	0.510783	0.551973	0.613297	0.688671	0.778124	0.919896	1.09726	1.27495	1.49693	2.0014	2.82478	4.70321	6.3573	7.70788	9.41232	11.379	16.4538	22.2766	38.0989
0.0714038	0.144109	0.19939	0.246094	0.311659	0.373573	0.426436	0.470393	0.513158	0.552369	0.614681	0.691544	0.778217	0.920336	1.10018	1.27514	1.4984	2.00461	2.82719	4.71657	6.38671	7.7355	9.41932	11.4468	16.4901	22.3417	38.6288
0.0714162	0.145205	0.199444	0.246094	0.311927	0.373781	0.426823	0.470605	0.514193	0.552569	0.616388	0.692983	0.782005	0.920642	1.10056	1.27641	1.49883	2.00535	2.83563	4.71726	6.41072	7.78217	9.46587	11.4718	16.6053	22.3447	38.6348
0.0715573	0.145301	0.199866	0.246094	0.311956	0.373843	0.427004	0.470706	0.514206	0.554507	0.618636	0.693631	0.782833	0.921773	1.10056	1.27861	1.50384	2.01942	2.84172	4.74743	6.41734	7.87884	9.46742	11.4902	16.7209	22.4539	39.1048
0.0717368	0.146052	0.200313	0.246094	0.313108	0.374593	0.428863	0.471063	0.514769	0.55465	0.619838	0.694244	0.783986	0.922236	1.10643	1.28048	1.50887	2.02053	2.85014	4.76285	6.45967	7.9057	9.46742	11.5349	16.9114	22.5355	39.3703
0.0717643	0.146201	0.200647	0.246094	0.31376	0.375649	0.429296	0.472105	0.516106	0.55465	0.620162	0.694327	0.784326	0.923808	1.10981	1.28384	1.51684	2.03578	2.85051	4.76357	6.50172	7.95555	9.49787	11.5612	16.9555	22.8446	39.4542
0.0717787	0.146433	0.200671	0.246094	0.313765	0.375885	0.42932	0.473036	0.517106	0.555102	0.621473	0.694368	0.788277	0.926478	1.11591	1.28528	1.51844	2.04493	2.85188	4.76978	6.50378	7.95818	9.50025	11.5958	17.009	22.8753	39.8505
0.0718696	0.146481	0.20075	0.246094	0.314047	0.376122	0.429987	0.473667	0.517295	0.555888	0.621884	0.694901	0.791052	0.926869	1.11908	1.28572	1.52099	2.04939	2.85621	4.77828	6.5043	8.06449	9.50572	11.6681	17.0494	23.1369	40.096
0.0718957	0.146603	0.200958	0.24713	0.314109	0.376217	0.429993	0.474306	0.517858	0.556866	0.621885	0.694977	0.791561	0.92774	1.11939	1.28612	1.52552	2.0532	2.86062	4.79103	6.61779	8.07248	9.59766	11.7172	17.0915	23.1746	40.1484
0.0719427	0.146778	0.201109	0.247263	0.314285	0.376311	0.430121	0.474363	0.518095	0.55714	0.622778	0.695414	0.793395	0.929386	1.12008	1.28669	1.53499	2.07815	2.86799	4.81655	6.62628	8.07248	9.60034	11.7402	17.1116	23.3466	40.2898
0.0719614	0.146864	0.20176	0.248047	0.314438	0.37702	0.430424	0.474508	0.519223	0.557298	0.623083	0.695736	0.794182	0.930242	1.12038	1.28792	1.5373	2.08776	2.86992	4.8237	6.65463	8.10343	9.60288	11.7766	17.1224	23.4571	40.3061
0.0720166	0.146947	0.202244	0.248047	0.314627	0.377337	0.430612	0.475388	0.519486	0.557538	0.623157	0.696058	0.794252	0.932329	1.12093	1.29434	1.54805	2.08907	2.8803	4.83471	6.68206	8.23453	9.61027	11.8904	17.1384	23.5432	40.4111
0.0720448	0.147172	0.205586	0.248047	0.314998	0.377408	0.430703	0.478309	0.520119	0.557592	0.623457	0.696058	0.794635	0.933469	1.1224	1.2949	1.55005	2.08975	2.88078	4.83498	6.69447	8.25057	9.62601	11.9191	17.2002	23.55	40.633
0.0720922	0.147286	0.205829	0.248047	0.315474	0.37779	0.431062	0.479989	0.520599	0.558598	0.623832	0.696058	0.794831	0.93521	1.1286	1.29557	1.55089	2.09157	2.8815	4.85901	6.70139	8.25424	9.62731	11.9427	17.2379	23.66	41.1926
0.0721887	0.147289	0.205989	0.248047	0.315622	0.381015	0.434083	0.480619	0.522601	0.560026	0.624982	0.698793	0.79494	0.937114	1.13213	1.29636	1.55279	2.10038	2.88817	4.88092	6.73112	8.30541	9.65298	11.9589	17.284	23.6762	41.7058
0.072237	0.147516	0.20648	0.248047	0.315661	0.38104	0.435329	0.480832	0.524705	0.560377	0.625696	0.699935	0.795436	0.939674	1.1342	1.29738	1.55408	2.10263	2.8927	4.88648	6.7888	8.34612	9.66573	12.1742	17.3503	23.6933	42.0104
0.0723175	0.147525	0.207086	0.248047	0.316237	0.381406	0.436093	0.481815	0.525001	0.564445	0.626335	0.701624	0.796932	0.940249	1.13607	1.30302	1.55514	2.11931	2.9094	4.88701	6.82981	8.35912	9.71149	12.2009	17.4062	23.7442	42.0499
0.0724036	0.147686	0.207212	0.248047	0.316417	0.382571	0.43618	0.481992	0.525489	0.565289	0.626488	0.702731	0.798372	0.943768	1.1363	1.30352	1.55643	2.11931	2.9159	4.88956	6.84211	8.35995	9.72922	12.2117	17.5855	23.763	42.8019
0.0724931	0.147982	0.207228	0.248873	0.316488	0.382791	0.436191	0.482493	0.526189	0.565863	0.627129	0.702954	0.798991	0.944322	1.13793	1.30553	1.55643	2.12641	2.93415	4.90338	6.84361	8.36719	9.7486	12.2911	17.6451	23.7792	43.3824
0.0727224	0.148083	0.207612	0.248882	0.317648	0.38318	0.436415	0.482968	0.526919	0.568533	0.632245	0.703977	0.800194	0.946251	1.13893	1.30588	1.56035	2.12764	2.94092	4.91713	6.89502	8.37081	9.7975	12.3604	17.6548	23.7945	43.6795
0.0728059	0.148265	0.207833	0.249091	0.317967	0.383808	0.437909	0.48322	0.52836	0.569721	0.633663	0.7048	0.800363	0.946331	1.13927	1.3098	1.56391	2.12918	2.95312	4.92536	6.89502	8.38165	9.84218	12.3732	17.7019	23.8215	44.9376
0.0728447	0.148373	0.20822	0.249505	0.31833	0.383954	0.438023	0.483544	0.529045	0.570048	0.635437	0.705849	0.802281	0.949829	1.14215	1.31151	1.57151	2.14	2.98688	4.95183	6.89638	8.40399	9.86	12.3752	17.7889	23.822	45.1265
0.0731755	0.148529	0.208224	0.249751	0.319124	0.384234	0.440441	0.484239	0.529282	0.571212	0.636547	0.706824	0.802518	0.951168	1.14444	1.31364	1.57816	2.14539	2.99386	4.9529	6.93102	8.4105	9.88366	12.4237	17.9241	23.928	45.3915
0.0732558	0.148997	0.208336	0.250203	0.319157	0.384296	0.440835	0.48537	0.529629	0.571273	0.636691	0.707299	0.803094	0.956457	1.14467	1.3147	1.58054	2.15615	2.99386	4.96115	6.9338	8.50235	9.89658	12.5107	17.9665	23.9515	45.4321
0.0733381	0.149081	0.208662	0.250271	0.319281	0.385481	0.442882	0.485705	0.530089	0.571441	0.636995	0.708983	0.806167	0.956936	1.14718	1.31711	1.58076	2.16119	2.99778	4.96172	6.94149	8.53097	9.90446	12.554	18.1577	23.9836	45.6396
0.0738877	0.149146	0.209147	0.250517	0.319287	0.385523	0.443349	0.486307	0.531094	0.574094	0.638319	0.709194	0.808385	0.957202	1.1478	1.32383	1.58126	2.17013	2.99894	4.96904	6.94301	8.53204	9.91664	12.5673	18.1604	24.3099	45.9115
0.0742053	0.149534	0.20929	0.251961	0.319569	0.385716	0.443809	0.487091	0.531405	0.57587	0.638716	0.711702	0.808954	0.957214	1.1507	1.32477	1.58196	2.17071	3.01845	4.97504	6.94723	8.54268	9.93372	12.818	18.2222	24.3225	46.1557
0.0742332	0.150045	0.20938	0.253441	0.319752	0.386296	0.443858	0.488303	0.531718	0.576037	0.639129	0.715383	0.809946	0.958861	1.15601	1.32526	1.58321	2.1746	3.01969	4.97802	6.95477	8.56038	10.0386	12.8257	18.2735	24.3464	46.7014
0.0743277	0.150125	0.209444	0.253852	0.319964	0.386635	0.444346	0.488806	0.531894	0.577374	0.640988	0.71598	0.810622	0.958996	1.15635	1.32693	1.5899	2.17955	3.0287	4.98302	6.96928	8.57415	10.0417	12.8393	18.2955	24.5571	47.0985
0.0743696	0.150411	0.209558	0.253932	0.320195	0.387298	0.445498	0.490822	0.532097	0.577908	0.643211	0.716616	0.812225	0.961234	1.15674	1.32726	1.60078	2.18218	3.03959	4.98302	6.96928	8.5854	10.0447	12.8465	18.3385	24.5685	47.8067
0.0743881	0.150447	0.209982	0.254134	0.320747	0.387521	0.445557	0.492188	0.532155	0.577986	0.643764	0.71676	0.812523	0.961288	1.15997	1.32845	1.60293	2.18225	3.04133	4.98302	6.9953	8.59033	10.0538	12.8741	18.3489	24.8256	48.2533
0.074502	0.151405	0.210082	0.254234	0.320849	0.387612	0.445998	0.492188	0.532255	0.579329	0.647346	0.717541	0.812576	0.962794	1.16457	1.33242	1.61425	2.18414	3.04257	4.98532	6.99796	8.59412	10.0873	12.9041	18.3956	24.8777	48.7974
0.0747332	0.15142	0.210148	0.254255	0.32099	0.38869	0.44652	0.492543	0.533453	0.585609	0.647838	0.717699	0.81396	0.963131	1.1647	1.3328	1.61723	2.1847	3.05101	4.99067	7.00395	8.60283	10.0892	13.0247	18.3965	24.8847	49.0246
0.0747712	0.151647	0.210174	0.255891	0.321832	0.388836	0.446748	0.492925	0.533967	0.585648	0.64793	0.718779	0.814098	0.966254	1.16822	1.33302	1.62882	2.18712	3.07096	5.0157	7.02864	8.61528	10.1436	13.1664	18.516	25.1057	50.0085
0.0750813	0.151665	0.210223	0.256276	0.322159	0.388903	0.447472	0.493498	0.534045	0.586257	0.648496	0.718851	0.81489	0.966361	1.17148	1.33491	1.63126	2.18724	3.07502	5.02174	7.04071	8.64082	10.1605	13.1692	18.6204	25.1069	50.1773
0.0752584	0.151724	0.210628	0.25664	0.323774	0.389423	0.449057	0.493653	0.534378	0.588404	0.648796	0.719034	0.816554	0.967244	1.17866	1.34883	1.64131	2.18787	3.07902	5.03297	7.07555	8.65459	10.1861	13.2982	18.6792	25.176	50.4498
0.0753835	0.151759	0.210923	0.256742	0.324639	0.39002	0.449261	0.493758	0.535063	0.589333	0.650477	0.719076	0.816732	0.971453	1.17947	1.35231	1.64928	2.20113	3.11287	5.04399	7.09843	8.71271	10.2358	13.3255	18.9092	25.2715	50.4786
0.0755955	0.152239	0.210978	0.257024	0.324845	0.39027	0.449283	0.495069	0.535841	0.589496	0.65067	0.720558	0.818636	0.971484	1.18058	1.35269	1.65085	2.2047	3.11752	5.04942	7.12318	8.72413	10.2421	13.5176	18.9804	25.4338	50.5092
0.075605	0.15226	0.211024	0.257215	0.325713	0.390428	0.449392	0.495739	0.535942	0.590767	0.65131	0.721325	0.820983	0.973167	1.18129	1.35397	1.65711	2.20613	3.12521	5.05554	7.12434	8.7429	10.2831	13.6128	19.0321	25.4438	50.6977
0.075719	0.152425	0.211189	0.257475	0.325761	0.390754	0.449862	0.496094	0.536229	0.591158	0.651397	0.72225	0.823491	0.973298	1.18251	1.36561	1.66499	2.20718	3.13733	5.0562	7.15367	8.79388	10.3341	13.7578	19.1543	25.4475	50.9509
0.0758871	0.152718	0.211423	0.257848	0.326529	0.391275	0.450817	0.496094	0.536277	0.591543	0.651404	0.722444	0.824198	0.977641	1.18561	1.36572	1.66694	2.20798	3.15054	5.0818	7.23152	8.80452	10.4287	13.887	19.2251	25.6319	51.8388
0.0761426	0.152739	0.211554	0.258002	0.326717	0.391479	0.450868	0.496266	0.536701	0.591709	0.65149	0.723326	0.826802	0.977977	1.18745	1.36613	1.66736	2.2186	3.15933	5.08548	7.24146	8.82616	10.4467	13.8879	19.241	25.6951	52.6567
0.0763915	0.152938	0.2117	0.258083	0.326854	0.391922	0.452366	0.496992	0.536991	0.592114	0.65282	0.724377	0.830249	0.978404	1.1885	1.36701	1.66821	2.2186	3.17655	5.09284	7.27849	8.85993	10.4941	13.9347	19.2791	25.8113	52.8294
0.0764798	0.153238	0.211714	0.258183	0.326859	0.393404	0.452944	0.498406	0.537225	0.593078	0.65294	0.725683	0.830775	0.979778	1.18919	1.37904	1.67231	2.2186	3.19708	5.10622	7.30447	8.87106	10.5593	13.9414	19.3023	25.8336	53.5142
0.0766598	0.153418	0.212188	0.259701	0.327216	0.393478	0.453272	0.49899	0.537503	0.596382	0.654148	0.726065	0.830867	0.981704	1.18937	1.37925	1.67724	2.2186	3.19922	5.11457	7.30986	8.87645	10.5706	14.1609	19.3135	25.8526	54.1162
0.0770231	0.153796	0.212268	0.259716	0.327275	0.393508	0.453915	0.499532	0.537508	0.597315	0.655656	0.726689	0.831513	0.985487	1.19033	1.38877	1.67977	2.2186	3.19922	5.12629	7.39602	8.89008	10.6959	14.1696	19.3702	26.0751	54.5252
0.0772023	0.153941	0.212585	0.260159	0.327363	0.394219	0.455497	0.499625	0.538457	0.597541	0.656083	0.727794	0.834185	0.993433	1.19121	1.3913	1.68029	2.22928	3.19922	5.14141	7.40205	8.91238	10.7356	14.1748	19.379	26.1982	54.8281
0.0773269	0.153964	0.213	0.260195	0.327873	0.394423	0.455839	0.499892	0.538606	0.600582	0.656485	0.727935	0.834213	0.996377	1.19572	1.39212	1.69259	2.23058	3.19922	5.1418	7.40329	8.91729	10.7867	14.1863	19.3899	26.2776	55.2961
0.0773331	0.154056	0.213434	0.260339	0.328179	0.395492	0.456669	0.501658	0.541015	0.601167	0.658688	0.728294	0.835745	0.997106	1.19688	1.39212	1.69674	2.24192	3.21222	5.15388	7.44001	8.93762	10.7873	14.2246	19.4604	26.2835	55.9064
0.0774516	0.154391	0.213731	0.260733	0.328211	0.395781	0.456982	0.502916	0.541649	0.601184	0.658698	0.728703	0.836323	0.999302	1.19826	1.39498	1.70023	2.24616	3.2356	5.16721	7.45485	8.95795	10.7945	14.3487	19.5181	26.3262	56.1667
0.0776409	0.154459	0.214319	0.261049	0.328823	0.39661	0.457899	0.50397	0.544267	0.602174	0.658953	0.730249	0.836353	0.99985	1.19834	1.39912	1.70259	2.24616	3.23679	5.18184	7.45557	8.95886	10.8533	14.3749	19.6644	26.4505	56.2361
0.0776507	0.154564	0.214344	0.261461	0.328973	0.397642	0.458107	0.504095	0.544434	0.60234	0.66113	0.730311	0.839626	1.00018	1.19906	1.4036	1.70613	2.25825	3.23686	5.21152	7.47591	8.97496	10.8917	14.5727	19.6977	26.7525	57.1107
0.0777057	0.154646	0.214542	0.261674	0.329055	0.397747	0.45816	0.505866	0.544564	0.603286	0.661207	0.730499	0.841972	1.00514	1.20239	1.40368	1.70649	2.26622	3.25076	5.24041	7.49577	9.00775	10.9602	14.6064	19.7021	26.7937	57.4112
0.0777879	0.154665	0.215008	0.261674	0.329249	0.397957	0.459032	0.506625	0.544816	0.60352	0.661927	0.731196	0.842203	1.00541	1.20662	1.40768	1.70888	2.26887	3.26677	5.25057	7.49678	9.01187	10.9959	14.6561	19.7259	26.9528	57.6942
0.0777908	0.154958	0.215209	0.262634	0.329641	0.397978	0.459145	0.507625	0.546321	0.604345	0.662574	0.732344	0.843039	1.00616	1.20749	1.40818	1.71081	2.26887	3.26859	5.27318	7.49678	9.02866	10.9977	14.8004	19.7259	27.0564	57.6965
0.0778657	0.155079	0.215216	0.264123	0.329768	0.399091	0.459862	0.508405	0.546765	0.604595	0.665097	0.733961	0.843812	1.01079	1.20832	1.41482	1.71085	2.26921	3.27396	5.30588	7.52366	9.02866	11.0056	14.9405	19.8571	27.115	57.9726
0.0779341	0.155147	0.215366	0.264339	0.329969	0.399942	0.4601	0.508805	0.547192	0.606539	0.666707	0.734583	0.843823	1.01344	1.20905	1.41607	1.7119	2.27072	3.2833	5.32382	7.54004	9.10879	11.0226	14.9587	19.8905	27.1875	58.0006
0.0779846	0.155205	0.21555	0.264585	0.33047	0.400281	0.460418	0.508847	0.547312	0.606956	0.66686	0.73468	0.845472	1.01495	1.20929	1.41683	1.71222	2.28688	3.28858	5.35709	7.5429	9.12519	11.0359	15.0117	19.9768	27.2615	58.0974
0.0780121	0.155208	0.215595	0.264743	0.330621	0.400415	0.460436	0.509207	0.547415	0.607047	0.667716	0.736426	0.846062	1.01601	1.21155	1.4211	1.71439	2.28996	3.3279	5.36307	7.5491	9.12554	11.0577	15.0275	20.0414	27.3215	58.1928
0.0781463	0.155287	0.215708	0.264781	0.330994	0.400548	0.461042	0.509563	0.549506	0.608197	0.668075	0.736711	0.846271	1.01655	1.21216	1.42116	1.71686	2.29727	3.33713	5.39579	7.5491	9.13535	11.0583	15.0751	20.2025	27.4517	58.5199
0.078177	0.155453	0.215737	0.265355	0.331456	0.400716	0.461091	0.509871	0.54989	0.608594	0.668295	0.737175	0.846328	1.01674	1.21346	1.43496	1.71879	2.30312	3.34724	5.40028	7.58113	9.16386	11.0605	15.1597	20.2506	27.6274	58.5351
0.0782061	0.155686	0.21682	0.265442	0.331665	0.401031	0.462395	0.510059	0.550272	0.608952	0.668431	0.737602	0.850823	1.01764	1.21549	1.43496	1.72215	2.30548	3.35781	5.41406	7.59603	9.16743	11.1206	15.1718	20.3087	27.7419	58.9912
0.0784704	0.155692	0.217012	0.2659	0.331885	0.402285	0.46241	0.51093	0.550282	0.609186	0.668756	0.738109	0.856147	1.02093	1.21601	1.43797	1.72461	2.31176	3.35837	5.5188	7.60925	9.20321	11.1424	15.4118	20.4908	27.7771	59.302
0.0784709	0.155831	0.217196	0.265915	0.332097	0.40387	0.462764	0.510978	0.550282	0.609348	0.669584	0.738128	0.856471	1.02203	1.21752	1.44078	1.72541	2.31348	3.37765	5.53446	7.61449	9.22441	11.1517	15.4256	20.5553	27.8321	59.4658
0.0785291	0.155899	0.217508	0.26622	0.332523	0.404444	0.46333	0.511137	0.550282	0.61066	0.671031	0.738207	0.858984	1.02207	1.21802	1.44359	1.72812	2.32563	3.38379	5.53641	7.64353	9.24084	11.1572	15.4341	20.5605	28.0601	59.7747
0.0785577	0.156	0.217537	0.266388	0.333416	0.404721	0.463999	0.511179	0.550284	0.611735	0.67588	0.738281	0.863081	1.02252	1.22065	1.44792	1.73029	2.33474	3.39	5.57933	7.68858	9.26372	11.1578	15.7852	20.5738	28.1888	59.862
0.0786386	0.156037	0.217933	0.266515	0.333628	0.405608	0.465185	0.511377	0.550629	0.613163	0.677052	0.738521	0.865585	1.02556	1.22134	1.4522	1.73333	2.33718	3.39117	5.59592	7.70815	9.26456	11.2677	15.8278	20.5776	28.3984	59.9106
0.0786443	0.15604	0.217954	0.266584	0.33398	0.406208	0.465794	0.511931	0.550691	0.613908	0.679813	0.738846	0.866217	1.02631	1.22221	1.4531	1.73375	2.33828	3.42164	5.60805	7.77262	9.32606	11.3108	15.8461	20.5931	28.6383	59.9868
0.0788745	0.156254	0.218017	0.26659	0.334103	0.407144	0.466087	0.51219	0.550758	0.614787	0.679827	0.739465	0.866223	1.02818	1.22443	1.45951	1.73592	2.34007	3.43763	5.61974	7.78251	9.3386	11.323	15.8475	20.6671	28.6719	60.1584
0.0789324	0.156499	0.218609	0.266609	0.334245	0.407431	0.46715	0.512335	0.551579	0.615009	0.679856	0.739473	0.867426	1.02882	1.22645	1.46093	1.74015	2.34007	3.44347	5.6655	7.80477	9.35272	11.3254	15.883	20.6744	28.6989	60.1991
0.079192	0.156499	0.218654	0.266887	0.334718	0.407655	0.467569	0.513158	0.553453	0.61555	0.680384	0.739982	0.868062	1.03004	1.22692	1.46811	1.74039	2.34998	3.45097	5.6759	7.86618	9.37097	11.3444	15.9323	20.6748	29.2918	60.2158
0.0795839	0.156794	0.218819	0.266898	0.335103	0.407797	0.468417	0.513291	0.554238	0.615691	0.68043	0.741532	0.868247	1.03488	1.22973	1.47167	1.74642	2.35167	3.45217	5.68377	7.86939	9.39544	11.3952	15.985	20.6846	29.3016	60.3432
0.0797151	0.156959	0.219182	0.267358	0.335133	0.4081	0.468462	0.51362	0.55465	0.615988	0.680487	0.742291	0.868745	1.03759	1.23047	1.47513	1.75628	2.35318	3.45409	5.76014	7.87884	9.41932	11.4488	16.0115	20.7085	29.5518	61.3287
0.0797809	0.157109	0.219243	0.267763	0.335494	0.408311	0.469127	0.513761	0.55465	0.617727	0.681152	0.74234	0.873458	1.0382	1.23047	1.47622	1.7654	2.35318	3.45752	5.76616	7.88951	9.42458	11.5559	16.0153	20.7237	29.7611	61.3448
0.0801222	0.157373	0.21925	0.267766	0.335599	0.408377	0.469468	0.515473	0.554666	0.618497	0.681347	0.742703	0.87385	1.04101	1.23453	1.47656	1.76998	2.38139	3.4604	5.78396	7.93888	9.46808	11.563	16.0564	20.8427	30.0092	62.2677
0.0802289	0.157483	0.219595	0.268222	0.336488	0.408821	0.469751	0.515702	0.555888	0.619341	0.681826	0.743514	0.87434	1.04125	1.23664	1.47788	1.77285	2.384	3.46963	5.80284	7.95153	9.49935	11.5843	16.0798	20.8688	30.0615	62.5843
0.0802632	0.157737	0.219801	0.268284	0.33667	0.409146	0.470524	0.515776	0.556141	0.619928	0.68221	0.746874	0.876199	1.04458	1.23953	1.48506	1.77328	2.38815	3.47151	5.80592	7.95843	9.5089	11.5993	16.2515	20.9194	30.2795	62.7462
0.0804648	0.157781	0.220253	0.268528	0.336712	0.409412	0.471858	0.515822	0.556148	0.619928	0.683172	0.748015	0.878322	1.0447	1.24089	1.48516	1.77428	2.39148	3.49558	5.89681	8.01223	9.53211	11.6271	16.3129	20.9254	30.4346	62.8865
0.0805031	0.157875	0.220363	0.269705	0.336991	0.409487	0.473765	0.516142	0.556335	0.620412	0.683334	0.748748	0.880378	1.04503	1.24486	1.48592	1.77492	2.39752	3.50654	5.9165	8.02062	9.54183	11.6395	16.3562	20.9411	30.4348	63.0253
0.0805893	0.158344	0.220494	0.269921	0.337449	0.409614	0.475156	0.517462	0.556794	0.622463	0.684065	0.750958	0.880577	1.04564	1.24508	1.48643	1.77845	2.39862	3.51374	5.91889	8.04045	9.55179	11.7766	16.456	20.9541	30.5652	63.1483
0.0806155	0.158478	0.220935	0.27032	0.337457	0.409695	0.475357	0.517486	0.556891	0.62303	0.685141	0.751156	0.880753	1.04692	1.24713	1.48801	1.7806	2.40166	3.53245	5.9262	8.06612	9.5878	11.8287	16.5323	20.9664	30.7418	63.2502
0.0806806	0.158482	0.221203	0.270681	0.338019	0.409712	0.475489	0.518042	0.557076	0.623493	0.685397	0.752799	0.881003	1.04775	1.248	1.4909	1.78459	2.40979	3.57083	5.93209	8.11736	9.62601	11.9096	16.5378	21.0015	30.8575	63.2766
0.0807663	0.158628	0.221362	0.271466	0.338548	0.409916	0.475732	0.518256	0.557119	0.623899	0.685649	0.753145	0.881579	1.05179	1.24871	1.49209	1.79159	2.41142	3.57253	5.94712	8.1186	9.63537	11.943	16.5494	21.0069	30.9597	63.6128
0.080777	0.158671	0.221621	0.271903	0.338673	0.410009	0.476102	0.518706	0.557544	0.625082	0.686484	0.753199	0.881646	1.05295	1.24971	1.49693	1.79768	2.41307	3.58318	5.96732	8.15087	9.66628	11.9585	16.6709	21.0182	31.0946	63.6465
0.0808006	0.15882	0.222164	0.272175	0.338743	0.410644	0.47758	0.518807	0.558203	0.626797	0.687262	0.75472	0.883286	1.05414	1.25214	1.49693	1.79949	2.41906	3.58485	5.98233	8.20137	9.67849	12.0236	16.7362	21.0263	31.1031	64.5812
0.0808302	0.158887	0.222223	0.27221	0.339152	0.411101	0.477904	0.518925	0.559163	0.627621	0.687412	0.755062	0.883356	1.05571	1.25255	1.5019	1.79983	2.42374	3.61162	6.00502	8.22483	9.67913	12.0577	16.8359	21.1286	31.1247	66.2573
0.0809503	0.159124	0.222332	0.272815	0.339502	0.411814	0.478514	0.519292	0.559309	0.628215	0.687776	0.755177	0.884352	1.05692	1.25333	1.50223	1.80523	2.4276	3.61736	6.05311	8.25424	9.69809	12.0854	16.8621	21.1294	31.4153	66.3362
0.0810154	0.159475	0.222832	0.272929	0.339602	0.412068	0.478642	0.520302	0.559929	0.628371	0.687996	0.755292	0.884628	1.06317	1.25434	1.50855	1.80557	2.4362	3.63353	6.07639	8.29072	9.73089	12.2129	16.8633	21.3299	31.5355	66.4215
0.0810557	0.159592	0.223184	0.273022	0.339962	0.413417	0.478852	0.521217	0.561067	0.628574	0.690027	0.755699	0.886267	1.06355	1.25484	1.50925	1.80826	2.43834	3.65845	6.10572	8.29398	9.78592	12.2597	16.9121	21.4508	32.3302	67.6185
0.0810663	0.160327	0.223285	0.273336	0.340527	0.413755	0.478887	0.522098	0.562123	0.628958	0.690825	0.756472	0.887304	1.06541	1.25484	1.5233	1.81047	2.44456	3.65845	6.12409	8.29681	9.7975	12.2769	16.9519	21.4951	32.636	67.8223
0.0810836	0.160367	0.223358	0.273866	0.340875	0.413805	0.479224	0.523011	0.563484	0.630034	0.690881	0.756478	0.887304	1.06736	1.25484	1.53735	1.81571	2.4486	3.65845	6.12909	8.31154	9.7975	12.3047	16.9601	21.5106	32.7245	68.1154
0.0813399	0.160804	0.22369	0.273923	0.340919	0.414415	0.480345	0.523389	0.564275	0.630301	0.691134	0.757342	0.88782	1.06863	1.25484	1.53999	1.81831	2.45106	3.67277	6.15234	8.34999	9.8263	12.3558	16.9957	21.6706	33.1649	68.4208
0.0813447	0.160811	0.223714	0.274096	0.341028	0.415293	0.482161	0.523484	0.564306	0.630863	0.691242	0.757783	0.890731	1.06945	1.25714	1.54264	1.8201	2.45941	3.6754	6.17054	8.37823	9.84973	12.4407	17.0221	21.6942	33.4779	68.4941
0.0813932	0.16088	0.225	0.274739	0.341292	0.4153	0.482359	0.525374	0.564319	0.632114	0.691291	0.758639	0.891649	1.06981	1.25885	1.54525	1.82465	2.46094	3.67944	6.18588	8.38165	9.87259	12.4624	17.0688	21.7211	33.6689	68.7593
0.0814435	0.160957	0.225035	0.2756	0.341903	0.415473	0.483001	0.525695	0.564445	0.634129	0.692832	0.760754	0.892995	1.071	1.26064	1.54595	1.82899	2.46094	3.68029	6.19226	8.3997	9.93256	12.4895	17.2215	21.8066	34.2143	69.4571
0.0816135	0.16128	0.225083	0.275689	0.342097	0.415904	0.483262	0.527462	0.564562	0.634256	0.693146	0.761628	0.893208	1.07426	1.26196	1.55328	1.83218	2.46211	3.69361	6.25942	8.41101	9.96604	12.4986	17.2234	21.9358	34.3746	69.7876
0.0816454	0.161286	0.225115	0.276024	0.342275	0.416102	0.483989	0.527962	0.565789	0.63549	0.693544	0.761662	0.893499	1.07497	1.26979	1.55403	1.85256	2.47381	3.69406	6.28337	8.44264	9.99571	12.508	17.2714	22.0901	34.4012	69.8644
0.0816981	0.161497	0.225231	0.276092	0.342331	0.416145	0.485142	0.528147	0.566516	0.635829	0.695119	0.761888	0.894382	1.07562	1.27052	1.55518	1.85863	2.47928	3.69413	6.28865	8.47637	10.0469	12.5505	17.321	22.171	34.5442	69.9577
0.0817211	0.161669	0.225438	0.27773	0.342697	0.416322	0.485585	0.528404	0.567769	0.636411	0.696031	0.765087	0.896371	1.07816	1.27297	1.56091	1.86055	2.48086	3.7207	6.29757	8.48569	10.0538	12.5893	17.3217	22.2503	34.7206	70.2257
0.0820205	0.162243	0.225684	0.277863	0.343692	0.416797	0.485705	0.528597	0.569194	0.636691	0.696058	0.766842	0.897357	1.07818	1.27306	1.56237	1.86339	2.48304	3.7207	6.30788	8.50004	10.0827	12.611	17.3335	22.2552	34.7932	70.273
0.0820483	0.162329	0.225707	0.278866	0.344253	0.417951	0.486326	0.529364	0.569708	0.638154	0.696058	0.766991	0.899188	1.07843	1.27308	1.56373	1.87419	2.48669	3.73927	6.30788	8.50759	10.1751	13.0638	17.597	22.3993	34.8073	71.0253
0.0821057	0.162338	0.225715	0.279032	0.344583	0.419688	0.486357	0.530227	0.570081	0.638688	0.696058	0.767786	0.90047	1.07883	1.2743	1.56616	1.87419	2.48695	3.7394	6.32866	8.52366	10.228	13.0801	17.6037	22.4082	34.9471	71.1152
0.0821126	0.162435	0.225735	0.279796	0.344692	0.419782	0.486997	0.530311	0.570227	0.6389	0.696058	0.767859	0.902021	1.07942	1.27443	1.56754	1.87421	2.49284	3.75646	6.33295	8.52849	10.2565	13.1571	17.6119	22.472	34.9877	71.835
0.0824241	0.162461	0.225789	0.279999	0.345511	0.420152	0.487091	0.533115	0.570648	0.639247	0.696253	0.768038	0.90342	1.07992	1.27477	1.56802	1.87464	2.494	3.76575	6.33552	8.58547	10.277	13.4273	17.6862	22.5241	35.3292	71.9903
0.0824371	0.162479	0.225855	0.280044	0.347063	0.421572	0.487939	0.533471	0.570852	0.639412	0.696392	0.770537	0.90362	1.08017	1.2754	1.56991	1.87472	2.49406	3.78571	6.34085	8.59887	10.2831	13.454	17.741	22.5402	35.524	72.458
0.0824569	0.162716	0.226536	0.28008	0.348029	0.421746	0.489767	0.534759	0.570898	0.640191	0.697677	0.771784	0.904623	1.08096	1.27576	1.57	1.87573	2.49511	3.79333	6.35094	8.6168	10.2846	13.4561	17.7521	22.6021	35.5985	72.8202
0.0827667	0.162779	0.226943	0.280469	0.348029	0.422623	0.489878	0.535274	0.571132	0.640205	0.699864	0.772079	0.90491	1.08581	1.2766	1.57194	1.87657	2.5006	3.80123	6.35256	8.62958	10.3763	13.4814	17.7791	22.6768	35.6085	72.9371
0.0829662	0.162909	0.227022	0.280587	0.348029	0.422837	0.490159	0.535517	0.571273	0.640259	0.700582	0.772488	0.906009	1.08599	1.28095	1.57572	1.87821	2.50877	3.80632	6.36032	8.64576	10.3861	13.4815	17.804	22.6903	35.7392	74.1237
0.0829743	0.163261	0.227045	0.281084	0.348029	0.424927	0.491581	0.536055	0.571533	0.641727	0.700739	0.772962	0.907571	1.08662	1.28277	1.57577	1.88105	2.50967	3.81296	6.38422	8.66935	10.4293	13.5545	17.8163	22.8327	35.9065	74.4434
0.0831244	0.16328	0.227293	0.281084	0.348029	0.426356	0.491707	0.536729	0.571861	0.643211	0.701583	0.773325	0.908647	1.08714	1.28281	1.57577	1.88907	2.50967	3.83287	6.39331	8.73594	10.4313	13.5776	18.0059	22.882	36.6092	76.1225
0.0831466	0.163488	0.227657	0.281312	0.348029	0.426593	0.491933	0.53723	0.572047	0.644655	0.702928	0.775602	0.909541	1.08907	1.28285	1.58316	1.90971	2.52384	3.8402	6.41734	8.73658	10.4467	13.5974	18.1107	22.9672	36.6168	77.8372
0.083183	0.163568	0.227662	0.281649	0.348029	0.427299	0.491946	0.537915	0.572543	0.644749	0.70301	0.777454	0.909748	1.08938	1.28309	1.58414	1.91498	2.52754	3.8562	6.42557	8.73893	10.4567	13.6443	18.1435	23.0029	36.6202	79.1542
0.0831888	0.164016	0.227667	0.281728	0.348029	0.42769	0.492188	0.53852	0.572885	0.645581	0.703901	0.778217	0.910807	1.0899	1.28388	1.58571	1.91944	2.52848	3.86036	6.44089	8.8217	10.5013	13.6641	18.1702	23.1597	36.7927	79.2231
0.0832206	0.164053	0.227675	0.281778	0.348118	0.4278	0.492188	0.540363	0.573496	0.645955	0.704087	0.778562	0.911134	1.09044	1.28507	1.5869	1.91981	2.53155	3.8641	6.45967	8.83496	10.5131	13.7327	18.2017	23.2741	37.5396	80.0095
0.0833147	0.164236	0.227781	0.281844	0.348461	0.428385	0.492188	0.540952	0.573944	0.647957	0.704094	0.778901	0.912689	1.09232	1.28623	1.58697	1.92205	2.53338	3.86432	6.49778	8.85771	10.5218	13.7516	18.2118	23.3166	37.542	80.7266
0.0833532	0.164712	0.227934	0.282443	0.348465	0.429186	0.492188	0.541161	0.574597	0.648771	0.70685	0.783129	0.914733	1.09463	1.28751	1.58776	1.92205	2.53393	3.8762	6.50172	8.86579	10.5677	13.8075	18.3121	23.3667	37.6715	80.7329
0.0835144	0.164725	0.228002	0.283037	0.348577	0.429797	0.492696	0.542635	0.576941	0.649116	0.706999	0.783374	0.914877	1.09481	1.28768	1.58994	1.92735	2.54011	3.87722	6.53353	8.89576	10.5726	13.8732	18.3188	23.3731	37.7744	80.7563
0.0837056	0.164832	0.22822	0.283183	0.348953	0.429993	0.492933	0.543439	0.577807	0.649473	0.707456	0.784393	0.915988	1.09739	1.28915	1.5922	1.9278	2.54161	3.88747	6.55578	8.91729	10.6254	13.8921	18.3794	23.6144	37.8623	80.8763
0.0837284	0.165003	0.228234	0.283269	0.349649	0.430607	0.493125	0.544554	0.582069	0.649709	0.707698	0.785022	0.916044	1.09758	1.2899	1.59404	1.92799	2.54539	3.89108	6.58016	8.91729	10.659	13.9113	18.4858	23.6362	37.8683	83.085
0.0838762	0.165123	0.228456	0.283447	0.349708	0.430874	0.495429	0.54514	0.58366	0.652317	0.709342	0.786795	0.916794	1.09943	1.29129	1.59462	1.93091	2.55345	3.89108	6.58071	8.95795	10.7339	13.9497	18.5016	23.6499	37.8773	84.3671
0.083987	0.165283	0.228661	0.283641	0.349794	0.430986	0.495855	0.54541	0.584107	0.653499	0.711135	0.788299	0.919198	1.10007	1.2943	1.59492	1.93226	2.55476	3.90195	6.59351	8.95795	10.7586	14.0078	18.509	23.766	37.9227	84.6748
0.0839902	0.165431	0.228735	0.284611	0.350791	0.431002	0.49587	0.545546	0.584547	0.653512	0.711248	0.794598	0.920563	1.10056	1.29501	1.59655	1.9341	2.55531	3.90445	6.62171	8.95853	10.7763	14.036	18.5242	23.7773	37.9576	86.1047
0.0841264	0.165546	0.2288	0.284673	0.350791	0.431035	0.496094	0.546473	0.585292	0.654902	0.713077	0.796757	0.922303	1.1087	1.29644	1.59729	1.93477	2.55867	3.91349	6.63066	9.00364	10.8598	14.1091	18.5274	23.8216	37.9873	89.3154
0.0842487	0.165683	0.229173	0.285232	0.350791	0.431948	0.496094	0.547881	0.585496	0.65516	0.713231	0.796762	0.923249	1.114	1.29868	1.60359	1.93991	2.56303	3.92197	6.6308	9.01205	10.9283	14.3055	18.6269	23.8643	37.9877	91.5661
0.0842879	0.165705	0.229527	0.285455	0.350792	0.432243	0.496094	0.54958	0.586028	0.65615	0.71357	0.797857	0.926041	1.11434	1.29992	1.60617	1.94957	2.56868	3.94338	6.65587	9.02866	10.9655	14.3506	18.6474	23.8711	38.0588	92.2277
0.084496	0.16576	0.229706	0.285585	0.35197	0.432881	0.496094	0.549835	0.586388	0.657158	0.714426	0.798762	0.930024	1.11462	1.30542	1.61246	1.96875	2.57494	3.96814	6.71705	9.03457	10.9948	14.363	18.7096	23.9697	38.1088	93.0563
0.0845067	0.165821	0.230239	0.28695	0.352016	0.432942	0.496094	0.550282	0.586806	0.657672	0.714533	0.800278	0.931812	1.11601	1.30849	1.61601	1.98006	2.58363	3.9727	6.7369	9.054	11.0005	14.3749	18.7219	24.0556	39.1228	93.9488
0.0845827	0.166317	0.230396	0.286968	0.352056	0.433414	0.496928	0.550282	0.588673	0.657847	0.714871	0.803966	0.932902	1.11741	1.30929	1.6176	1.98407	2.6018	3.97373	6.74824	9.05991	11.003	14.5378	18.7823	24.1218	39.7692	94.3217
0.0847508	0.166343	0.230455	0.287199	0.352617	0.434262	0.497543	0.550282	0.589241	0.658016	0.714988	0.806765	0.933561	1.12194	1.30943	1.6195	1.98438	2.60497	3.97577	6.7575	9.06039	11.0066	14.5724	18.8354	24.1935	40.1503	95.439
0.0847586	0.166736	0.230742	0.287355	0.353546	0.434278	0.498133	0.550282	0.58956	0.659072	0.716292	0.807083	0.934908	1.12197	1.31176	1.6213	1.99078	2.62493	3.97838	6.78093	9.11297	11.0162	14.6003	18.874	24.2258	40.1857	97.3014
0.0848225	0.166862	0.231521	0.287897	0.353578	0.434315	0.498284	0.550282	0.59111	0.659135	0.716327	0.807222	0.935426	1.12746	1.31336	1.62826	1.99788	2.63352	3.98505	6.81599	9.16026	11.0705	14.6218	18.8808	24.3166	40.68	99.0401
0.0848936	0.167054	0.231756	0.288554	0.353677	0.435611	0.498845	0.551042	0.591985	0.659461	0.717032	0.807668	0.936111	1.12875	1.31394	1.62999	1.99982	2.63411	3.98958	6.89186	9.19318	11.097	14.6319	18.9108	24.3377	40.9144	100.176
0.0849317	0.167445	0.232025	0.288804	0.353701	0.435867	0.499571	0.551218	0.592412	0.66014	0.718315	0.808865	0.936905	1.12889	1.31429	1.63147	1.99982	2.64266	3.99395	6.91259	9.19482	11.1596	14.8132	18.9875	24.4341	41.6655	100.905
0.0849537	0.167977	0.234234	0.289833	0.354632	0.435992	0.499632	0.551237	0.592556	0.660759	0.720073	0.809252	0.937361	1.13488	1.31461	1.63406	1.99982	2.64741	3.99436	6.92482	9.20804	11.161	14.8188	19.102	24.601	41.8854	100.999
0.085009	0.16832	0.234289	0.290007	0.354751	0.436534	0.500354	0.552524	0.593885	0.661415	0.720278	0.809373	0.938656	1.13513	1.3175	1.63661	1.99996	2.64788	3.99636	6.93419	9.21505	11.2263	14.8448	19.1298	24.6057	42.6505	116.684
0.0850284	0.168457	0.234496	0.290077	0.354862	0.437097	0.500652	0.55465	0.594785	0.661853	0.722389	0.811091	0.943649	1.14067	1.31887	1.63969	2.00271	2.65194	4.00895	6.94752	9.21634	11.2391	14.892	19.2095	24.6732	43.084	121.702
0.0850567	0.168544	0.234502	0.290177	0.355103	0.437411	0.500754	0.55465	0.595551	0.661927	0.722928	0.811552	0.943753	1.14149	1.31959	1.64738	2.00343	2.65797	4.02519	6.95953	9.22441	11.2933	14.9393	19.2205	24.7195	43.113	126.279
0.0851684	0.168546	0.235544	0.290498	0.355272	0.437864	0.500815	0.554666	0.595949	0.662915	0.72447	0.813751	0.94385	1.14153	1.32006	1.65085	2.0095	2.65918	4.02529	6.96017	9.24736	11.3438	15.0117	19.3086	24.7308	43.1591	130.571
0.0851906	0.168654	0.235715	0.29064	0.35543	0.438034	0.501022	0.555595	0.597936	0.664357	0.724901	0.814405	0.944423	1.142	1.32028	1.65085	2.01257	2.66622	4.06278	6.9953	9.28273	11.355	15.0963	19.3164	24.7881	43.7057
0.0852906	0.168846	0.235758	0.291137	0.355938	0.438621	0.501258	0.555888	0.599149	0.664363	0.726612	0.818009	0.944494	1.14283	1.32526	1.65315	2.02179	2.67692	4.06647	6.99963	9.28658	11.4213	15.1134	19.3255	24.8059	43.8296
0.0853539	0.168946	0.235784	0.292026	0.356116	0.438665	0.50286	0.555942	0.599358	0.664518	0.727843	0.819214	0.944675	1.14771	1.32526	1.65734	2.02727	2.68008	4.0805	7.00338	9.29681	11.4319	15.1623	19.3316	24.9548	44.2339
0.0854438	0.169417	0.23622	0.292815	0.357067	0.439386	0.504156	0.556576	0.600273	0.664584	0.729262	0.822066	0.944837	1.14791	1.32926	1.65834	2.02892	2.68326	4.08084	7.01672	9.40323	11.506	15.179	19.3522	24.9741	44.2757
0.0855403	0.169419	0.236391	0.293023	0.357382	0.439681	0.504801	0.556941	0.601023	0.664736	0.729608	0.822754	0.945071	1.15079	1.33033	1.65965	2.02934	2.68413	4.08586	7.01747	9.41475	11.5271	15.2483	19.3971	24.9942	44.445
0.0855636	0.169791	0.23665	0.293131	0.357917	0.439889	0.505103	0.557621	0.601267	0.666955	0.729937	0.822956	0.945942	1.15194	1.33116	1.66573	2.02934	2.68415	4.10227	7.02428	9.43644	11.5741	15.3713	19.4211	25.0475	44.4722
0.085676	0.169806	0.2372	0.293616	0.358248	0.440465	0.505587	0.55835	0.603286	0.667591	0.731778	0.823274	0.946951	1.15256	1.33133	1.66877	2.03373	2.68476	4.10866	7.02659	9.47061	11.5855	15.3764	19.4651	25.103	44.6
0.0857898	0.170158	0.237284	0.293738	0.358481	0.440685	0.50658	0.558713	0.603717	0.667647	0.731946	0.823425	0.946966	1.15458	1.33518	1.66917	2.04138	2.68927	4.12528	7.04961	9.49935	11.5902	15.4256	19.4768	25.2112	45.5479
0.0859837	0.170455	0.237377	0.293858	0.35853	0.4407	0.506897	0.558827	0.603849	0.667795	0.732236	0.824651	0.947455	1.15553	1.33597	1.67012	2.04208	2.70195	4.14433	7.05135	9.5089	11.616	15.6516	19.689	25.2765	45.5699
0.0860474	0.171078	0.23757	0.293859	0.358717	0.441621	0.508113	0.559304	0.604154	0.667795	0.732515	0.824965	0.952231	1.1572	1.3364	1.68096	2.04328	2.70751	4.1579	7.08562	9.52471	11.6182	15.6684	19.732	25.4429	45.9025
0.0863624	0.17126	0.23759	0.294315	0.35874	0.441728	0.509339	0.560066	0.604545	0.667813	0.732584	0.826518	0.952796	1.16082	1.33705	1.68181	2.0441	2.71217	4.18045	7.08562	9.57071	11.6344	15.6925	19.8086	25.4484	46.0827
0.0865719	0.171756	0.237838	0.294609	0.358895	0.442455	0.50991	0.560213	0.604828	0.668591	0.733228	0.826576	0.957446	1.1621	1.33856	1.68747	2.04489	2.71776	4.19256	7.09077	9.57238	11.6681	15.7654	19.8499	25.4753	46.2403
0.0866834	0.171898	0.237865	0.294731	0.359027	0.44276	0.510512	0.560577	0.605591	0.669522	0.733762	0.827072	0.958371	1.16223	1.33892	1.69005	2.04545	2.71819	4.19375	7.10257	9.6025	11.6878	15.7751	19.857	25.4897	46.2892
0.0868517	0.17202	0.238412	0.295817	0.359929	0.442865	0.510947	0.562413	0.605796	0.670184	0.735055	0.828378	0.959107	1.16285	1.33921	1.69412	2.04666	2.72624	4.20525	7.12295	9.60879	11.6914	15.8821	19.8864	25.6262	46.3761
0.0869569	0.17208	0.238542	0.296021	0.360033	0.443088	0.511408	0.562778	0.607616	0.671997	0.735618	0.829909	0.964002	1.16351	1.34052	1.69688	2.04915	2.74357	4.20688	7.13964	9.73549	11.747	15.9007	19.9574	25.7743	46.717
0.0871666	0.172698	0.23875	0.296274	0.360168	0.443535	0.512313	0.563538	0.609206	0.674221	0.73577	0.830028	0.96472	1.16678	1.34141	1.6981	2.05017	2.75141	4.21245	7.15367	9.75103	11.7973	15.9126	19.9579	25.7893	46.7324
0.0872631	0.172773	0.238879	0.296443	0.360797	0.443683	0.513127	0.56411	0.609461	0.675098	0.736655	0.831729	0.966483	1.16836	1.34239	1.69825	2.05136	2.75141	4.2217	7.20471	9.76964	11.84	15.9126	20.0657	26.0243	47.5018
0.0873451	0.173229	0.239273	0.296959	0.360985	0.443937	0.513366	0.564385	0.610441	0.675596	0.737507	0.833824	0.967626	1.16958	1.34916	1.69851	2.05983	2.75319	4.26467	7.23783	9.79038	11.973	16.0325	20.0715	26.0558	47.9098
0.0873767	0.173285	0.239611	0.297284	0.361435	0.443978	0.513445	0.564463	0.611431	0.676599	0.737604	0.838547	0.9699	1.17262	1.35343	1.69967	2.06373	2.75359	4.26758	7.24347	9.79591	11.9842	16.0589	20.1362	26.0845	48.235
0.0875119	0.17353	0.239915	0.297701	0.361872	0.444237	0.514262	0.565116	0.611494	0.677374	0.738281	0.840656	0.970628	1.17346	1.35404	1.69986	2.0682	2.75512	4.2721	7.25312	9.84641	11.9903	16.0792	20.1932	26.0945	48.6451
0.0875119	0.173918	0.239966	0.297839	0.36219	0.444486	0.515462	0.565789	0.612341	0.67856	0.738281	0.841267	0.97079	1.17482	1.35578	1.70416	2.07176	2.75526	4.27653	7.27191	9.8499	11.9928	16.086	20.1967	26.1273	48.9727
0.0876151	0.174059	0.239989	0.298193	0.362253	0.444674	0.516017	0.566456	0.612605	0.678838	0.738281	0.841369	0.971484	1.17597	1.35674	1.70829	2.08698	2.76342	4.29337	7.27302	9.85151	12.0083	16.1843	20.2819	26.2925	48.9918
0.0876374	0.174377	0.240054	0.298453	0.362675	0.444856	0.516822	0.566542	0.61275	0.679319	0.740961	0.841484	0.976331	1.17694	1.35767	1.70922	2.0901	2.76675	4.29535	7.29051	9.85505	12.0094	16.198	20.3068	26.3824	49.1674
0.0878074	0.174397	0.240197	0.298492	0.362875	0.445544	0.516994	0.566609	0.615574	0.679698	0.741472	0.841712	0.981704	1.17758	1.3584	1.70986	2.10212	2.76771	4.30904	7.30447	9.85988	12.0284	16.2598	20.3188	26.5457	49.7109
0.0880944	0.174432	0.240287	0.298736	0.363758	0.445956	0.517694	0.567292	0.616587	0.680199	0.741708	0.842833	0.984375	1.17813	1.35874	1.71459	2.10935	2.77108	4.33378	7.31771	9.88005	12.0646	16.273	20.3462	26.5995	49.7172
0.0882414	0.174654	0.240321	0.298953	0.364371	0.446158	0.517739	0.56756	0.616659	0.682476	0.742563	0.844342	0.986968	1.18336	1.36443	1.7169	2.11428	2.77668	4.34131	7.34137	9.88366	12.0816	16.3209	20.4146	26.8784	49.7572
0.0883135	0.174662	0.240379	0.299155	0.365443	0.44636	0.518839	0.568141	0.616896	0.683112	0.742645	0.844761	0.988235	1.18342	1.36474	1.72013	2.11509	2.78298	4.34454	7.34764	9.9071	12.0987	16.3574	20.4495	26.8953	50.359
0.0884844	0.174828	0.240963	0.299386	0.365692	0.446385	0.520046	0.568173	0.618657	0.6832	0.743314	0.845782	0.988732	1.18525	1.36787	1.72069	2.11521	2.7903	4.34941	7.35006	9.92022	12.181	16.4816	20.5178	27.1107	50.551
0.0885504	0.174843	0.24128	0.300435	0.36663	0.446716	0.521893	0.568695	0.620752	0.683875	0.744141	0.846258	0.989559	1.18617	1.36927	1.72266	2.11607	2.79741	4.36079	7.35819	9.9535	12.2192	16.4874	20.5455	27.2446	50.7962
0.0887124	0.174935	0.241313	0.300547	0.367315	0.447594	0.522071	0.568975	0.623587	0.683971	0.744163	0.846276	0.990185	1.18827	1.37192	1.73024	2.11754	2.80251	4.36103	7.36277	9.9549	12.3898	16.5176	20.5913	27.6046	52.0795
0.0888156	0.175048	0.241343	0.300598	0.367923	0.448083	0.522306	0.569346	0.623947	0.685821	0.746874	0.846383	0.9906	1.19276	1.37471	1.73498	2.11931	2.80305	4.37352	7.38281	9.95692	12.432	16.709	20.7032	27.6416	52.4619
0.0889766	0.175079	0.241488	0.300611	0.368029	0.448582	0.522493	0.57042	0.626261	0.686828	0.747124	0.846859	0.992188	1.19632	1.38013	1.73554	2.11931	2.8059	4.37889	7.38753	9.99515	12.525	16.738	20.7424	27.8059	52.6971
0.0890136	0.175226	0.241949	0.300717	0.368096	0.448688	0.522997	0.570514	0.626454	0.686911	0.747365	0.847323	0.993917	1.19709	1.38016	1.73599	2.12874	2.80685	4.38126	7.3947	10.0176	12.5411	16.7404	20.7466	27.8967	52.7337
0.0892684	0.175448	0.241961	0.30081	0.368305	0.448886	0.523083	0.571569	0.627234	0.686934	0.747655	0.847909	0.994003	1.19918	1.38189	1.73633	2.13101	2.81401	4.40523	7.39774	10.0266	12.7125	16.794	20.7603	27.9074	52.8349
0.089304	0.175801	0.242435	0.301228	0.368561	0.451194	0.523278	0.57158	0.629067	0.689816	0.748715	0.849048	0.995888	1.19977	1.38202	1.74015	2.13378	2.81985	4.40714	7.48465	10.0349	12.8211	16.8821	20.7967	28.0313	52.8394
0.0893465	0.175809	0.242648	0.30154	0.368777	0.451224	0.523368	0.571603	0.629377	0.691568	0.7502	0.850313	0.997125	1.20028	1.38718	1.74015	2.13378	2.82817	4.40811	7.48465	10.0988	12.8781	16.9493	20.8937	28.2329	54.2199
0.0893923	0.175825	0.242714	0.301586	0.368784	0.451858	0.5234	0.572771	0.630021	0.692242	0.751296	0.850392	0.998504	1.20409	1.39144	1.74015	2.13863	2.83205	4.42987	7.49131	10.1265	13.0497	16.9662	20.913	28.3744	54.6406
0.0894224	0.176029	0.242935	0.301777	0.368883	0.451926	0.52374	0.573009	0.63048	0.693004	0.751692	0.850978	1.00084	1.20413	1.39197	1.74082	2.14157	2.8356	4.43652	7.50064	10.2552	13.0936	17.0011	20.9318	28.4674	54.6937
0.0894323	0.176044	0.243477	0.301822	0.368913	0.45232	0.523834	0.573939	0.631088	0.693023	0.752686	0.851392	1.00101	1.20826	1.39212	1.74595	2.14382	2.84378	4.45243	7.51898	10.2683	13.1444	17.106	20.9483	28.8014	54.7989
0.0895117	0.176176	0.243784	0.30202	0.369375	0.45239	0.52425	0.574909	0.631447	0.695089	0.755252	0.852793	1.00224	1.2085	1.39622	1.74655	2.15444	2.84441	4.45784	7.55646	10.2722	13.1574	17.1102	20.9689	28.9256	54.8412
0.0895862	0.176217	0.24416	0.302023	0.369459	0.452529	0.524362	0.575076	0.63169	0.695155	0.755927	0.853763	1.00313	1.20887	1.40102	1.75044	2.16139	2.86292	4.46465	7.56515	10.2831	13.1593	17.1142	20.9731	29.1194	54.8661
0.0901271	0.176475	0.244186	0.302675	0.36952	0.453522	0.524718	0.575172	0.632534	0.695319	0.756064	0.855084	1.00351	1.20895	1.40879	1.75396	2.167	2.88045	4.47363	7.59477	10.2831	13.1636	17.1269	21.0153	29.2107	54.9908
0.0904891	0.176609	0.244197	0.303413	0.369757	0.453787	0.524808	0.575495	0.632892	0.695935	0.756924	0.855326	1.00638	1.2161	1.41234	1.75535	2.16743	2.8828	4.49134	7.64145	10.3506	13.2371	17.2181	21.0383	29.3809	55.3695
0.0905479	0.176609	0.244207	0.30342	0.369872	0.454058	0.524915	0.576019	0.632898	0.696058	0.75737	0.855911	1.00731	1.21629	1.41924	1.75997	2.17135	2.88594	4.50063	7.66354	10.3809	13.2761	17.2698	21.0511	29.4159	55.4952
0.0905858	0.176665	0.244261	0.303572	0.369977	0.454901	0.525125	0.576156	0.63313	0.697214	0.75774	0.856019	1.00766	1.21722	1.42233	1.76004	2.20113	2.88627	4.50798	7.66455	10.3922	13.2832	17.3739	21.0918	29.4376	55.5785
0.0905907	0.176776	0.244713	0.303794	0.369979	0.454929	0.525901	0.576608	0.633338	0.697316	0.759201	0.856561	1.00969	1.22095	1.42289	1.7631	2.20113	2.88642	4.51463	7.6889	10.3927	13.3096	17.4341	21.1494	29.5154	55.6547
0.0906364	0.176814	0.244793	0.304333	0.371682	0.454943	0.526034	0.576797	0.633582	0.698297	0.759382	0.856944	1.00979	1.22131	1.42552	1.76818	2.20374	2.88681	4.51584	7.72073	10.403	13.3469	17.4652	21.1495	29.6714	56.2188
0.0908537	0.176915	0.244945	0.305375	0.372165	0.455037	0.526427	0.578796	0.633921	0.69866	0.759797	0.857063	1.00988	1.22179	1.4279	1.76931	2.20389	2.89252	4.51617	7.72358	10.4093	13.3584	17.4999	21.1512	29.8287	56.2285
0.091078	0.176917	0.245476	0.305625	0.372434	0.455123	0.526468	0.579542	0.635137	0.698991	0.759875	0.858131	1.01104	1.22283	1.43324	1.77007	2.20389	2.89639	4.52203	7.79886	10.4236	13.4028	17.5478	21.2444	30.198	56.3253
0.0911565	0.177081	0.245602	0.305647	0.372616	0.455147	0.528215	0.579692	0.635561	0.699016	0.761409	0.859214	1.01161	1.22567	1.44214	1.77188	2.20717	2.89879	4.52438	7.80401	10.4293	13.4577	17.5832	21.2603	30.3712	56.4209
0.0913311	0.177085	0.245659	0.306952	0.372968	0.456089	0.529139	0.580796	0.635871	0.699247	0.762356	0.860253	1.01467	1.22569	1.44237	1.77242	2.2081	2.91989	4.53073	7.8082	10.5043	13.4983	17.6068	21.289	30.5394	56.9158
0.0915255	0.177143	0.245896	0.307617	0.373216	0.456197	0.529441	0.581085	0.636179	0.700151	0.762379	0.862368	1.01467	1.22636	1.4437	1.77461	2.21763	2.94123	4.53671	7.82719	10.5131	13.5033	17.6184	21.3462	30.6014	56.9716
0.0915788	0.177326	0.246094	0.307644	0.373421	0.456331	0.530414	0.581173	0.636552	0.700971	0.763185	0.862619	1.01502	1.22763	1.44569	1.77527	2.2186	2.95646	4.53774	7.8344	10.5216	13.5776	17.7202	21.3635	30.6925	57.3265
0.091719	0.177633	0.246094	0.308052	0.374209	0.456669	0.530439	0.581907	0.636933	0.703049	0.763677	0.863125	1.01587	1.22835	1.45395	1.78106	2.2186	2.96336	4.53774	7.85189	10.5849	13.5881	17.7358	21.39	30.7908	57.3418
0.0918403	0.178	0.246094	0.308215	0.374655	0.457604	0.530678	0.582511	0.637614	0.706975	0.764589	0.864259	1.01672	1.22872	1.45445	1.78418	2.2186	2.96761	4.56028	7.86242	10.6166	13.6338	17.7461	21.4024	31.015	57.6075
0.091951	0.178595	0.246094	0.308529	0.375196	0.458537	0.531377	0.582542	0.638306	0.707374	0.765569	0.865195	1.01971	1.22927	1.4558	1.78869	2.2186	2.97754	4.59331	7.86346	10.6637	13.6842	17.755	21.5008	31.1325	57.611
0.0920425	0.178608	0.246094	0.308559	0.375202	0.45912	0.532806	0.582839	0.638444	0.708828	0.766381	0.865279	1.02204	1.23036	1.45731	1.78889	2.2186	2.98381	4.59741	7.86475	10.6855	13.6842	17.7633	21.5332	31.1559	57.6766
0.0920618	0.178768	0.246094	0.309479	0.375445	0.460474	0.533057	0.582864	0.641073	0.709303	0.766425	0.865585	1.02272	1.23047	1.46173	1.79042	2.22847	2.99426	4.59741	7.86681	10.7201	13.8545	17.8229	21.5872	31.2947	57.8844
0.0921507	0.178781	0.246094	0.30993	0.37586	0.460686	0.534203	0.583421	0.642034	0.70948	0.767092	0.867948	1.02389	1.23047	1.46987	1.79159	2.22847	2.99978	4.59834	7.90953	10.7227	13.9212	17.8482	21.5947	31.7184	57.9027
0.0922284	0.178822	0.246094	0.310938	0.375961	0.460773	0.534272	0.583928	0.642119	0.709787	0.767632	0.870172	1.02666	1.23047	1.47137	1.79159	2.23293	3.01492	4.62322	7.9166	10.735	13.9668	17.8512	21.5947	31.7818	58.0069
0.0922975	0.178954	0.246094	0.311044	0.376099	0.461337	0.534442	0.584295	0.643195	0.710317	0.767891	0.870732	1.02821	1.23099	1.4737	1.79381	2.24361	3.03289	4.62368	7.9307	10.7539	14.036	17.9716	21.6211	32.446	58.2707
0.0923707	0.179069	0.246094	0.311066	0.377428	0.461705	0.534754	0.58432	0.645146	0.711007	0.768174	0.87083	1.02942	1.23455	1.47798	1.79542	2.2441	3.03746	4.64089	7.95153	10.846	14.0862	17.98	21.6283	32.5468	58.3568
0.0925355	0.179243	0.246094	0.31113	0.377496	0.462256	0.534903	0.584783	0.645737	0.711805	0.770252	0.871145	1.03039	1.23501	1.4786	1.79877	2.24731	3.07217	4.64768	7.95745	10.8533	14.1179	17.9918	21.6527	32.6175	58.4699
0.0926414	0.179331	0.246094	0.311294	0.378495	0.462289	0.535253	0.584799	0.647387	0.712709	0.771419	0.871308	1.03146	1.23546	1.48037	1.80338	2.24823	3.07637	4.6693	7.96913	10.9049	14.2798	18.0039	21.6654	32.6909	58.4963
0.0927281	0.179354	0.246094	0.311524	0.378866	0.462997	0.535264	0.58499	0.64869	0.712781	0.771776	0.873148	1.03169	1.23644	1.48175	1.8035	2.25222	3.09347	4.6693	7.96957	10.9377	14.2819	18.0288	21.7002	32.833	58.7612
0.092876	0.179516	0.246094	0.311524	0.379336	0.464113	0.535428	0.585461	0.648872	0.713335	0.772429	0.874374	1.03709	1.23659	1.48416	1.80581	2.2549	3.09621	4.67277	8.01197	10.955	14.3264	18.0682	21.7359	32.9911	59.2868
0.0929024	0.179651	0.246094	0.311729	0.379388	0.464197	0.536373	0.586004	0.649213	0.715794	0.772578	0.875777	1.03766	1.23684	1.48674	1.80637	2.26578	3.10227	4.6811	8.01223	10.9647	14.334	18.1277	21.8357	32.9933	59.4025
0.0929774	0.17971	0.246094	0.311933	0.379677	0.464564	0.536714	0.586076	0.649314	0.715814	0.775486	0.877048	1.03864	1.23791	1.48781	1.80665	2.26887	3.11287	4.68208	8.02926	11.0108	14.3369	18.1283	21.851	33.1361	59.6847
0.0930247	0.179788	0.246094	0.312287	0.379773	0.46495	0.536832	0.587943	0.651083	0.715933	0.776115	0.8771	1.03896	1.23927	1.48848	1.80852	2.27399	3.12441	4.68947	8.03488	11.0304	14.3484	18.1544	22.0632	33.2088	59.7636
0.0930524	0.179866	0.246094	0.312343	0.380357	0.465072	0.537179	0.589362	0.651332	0.717485	0.776244	0.878258	1.04243	1.2397	1.49693	1.80935	2.28183	3.13143	4.6942	8.05596	11.0716	14.4029	18.1552	22.1945	33.6526	60.2059
0.0930538	0.179988	0.246094	0.312682	0.380756	0.465261	0.537196	0.589693	0.651582	0.717836	0.777752	0.878613	1.04248	1.24023	1.49693	1.81949	2.28688	3.14959	4.69606	8.05945	11.0865	14.5952	18.1746	22.2219	33.6754	60.2342
0.0932725	0.179994	0.246094	0.312836	0.381012	0.465455	0.53727	0.590845	0.652378	0.717879	0.778088	0.878764	1.04409	1.24033	1.49693	1.8199	2.28978	3.15433	4.70161	8.07039	11.0987	14.6257	18.1788	22.248	33.6975	60.2869
0.0933849	0.180218	0.246094	0.312896	0.381508	0.465787	0.538065	0.591233	0.652636	0.718865	0.778217	0.879574	1.04647	1.24034	1.49693	1.81991	2.29072	3.15712	4.70947	8.10341	11.1141	14.6366	18.2209	22.4618	33.7077	60.4228
0.0936726	0.18058	0.246094	0.31354	0.382238	0.465891	0.539011	0.593243	0.652907	0.718999	0.778217	0.879794	1.04772	1.24123	1.49974	1.82141	2.29116	3.17022	4.73019	8.12048	11.1423	14.6372	18.2895	22.464	33.7955	60.5117
0.0936853	0.180662	0.246094	0.314019	0.382393	0.466087	0.539133	0.593263	0.653417	0.719043	0.778217	0.882562	1.04943	1.24232	1.50401	1.82643	2.29168	3.18649	4.74204	8.1212	11.1468	14.6825	18.3715	22.5532	33.8785	60.6834
0.0937066	0.180687	0.246094	0.314106	0.382618	0.466088	0.539186	0.594372	0.654268	0.721348	0.780931	0.88341	1.0504	1.24277	1.50754	1.82866	2.29263	3.192	4.75475	8.12278	11.1732	14.707	18.3913	22.6024	34.2021	60.8926
0.0937746	0.180982	0.246094	0.314323	0.382811	0.466105	0.539194	0.594641	0.655008	0.722362	0.781088	0.884352	1.05152	1.24308	1.50881	1.83065	2.29277	3.19922	4.77295	8.12952	11.1826	14.7625	18.4255	22.7936	34.2566	61.5392
0.0938531	0.180986	0.246094	0.314408	0.383001	0.466203	0.539203	0.594782	0.65574	0.72258	0.781099	0.887304	1.05154	1.24334	1.50881	1.83119	2.29764	3.19922	4.78022	8.14715	11.2344	14.7656	18.4455	22.8473	34.3131	62.0266
0.0939992	0.181366	0.246094	0.314661	0.383374	0.466434	0.539283	0.595047	0.657516	0.722702	0.782357	0.887304	1.05306	1.24378	1.5132	1.84064	2.30412	3.19922	4.81896	8.17408	11.2586	14.7738	18.448	22.9139	34.3617	62.8005
0.0940256	0.181483	0.246094	0.314767	0.384401	0.466722	0.539329	0.595099	0.658769	0.722972	0.782895	0.887304	1.05339	1.24427	1.51682	1.86183	2.3085	3.19922	4.84261	8.18279	11.3454	14.8413	18.457	22.9182	34.5867	62.9125
0.0942145	0.181618	0.246094	0.315029	0.385345	0.46673	0.540789	0.595169	0.659456	0.723163	0.783224	0.887304	1.0534	1.24829	1.52366	1.86594	2.31107	3.19922	4.84628	8.18336	11.3465	14.9334	18.4624	22.9976	34.7392	63.031
0.0943278	0.181748	0.246094	0.31524	0.385457	0.466817	0.541304	0.595288	0.65968	0.723549	0.784393	0.887304	1.05693	1.24892	1.52451	1.87079	2.31108	3.20089	4.8657	8.22483	11.448	15.0036	18.6879	23.0433	34.8042	63.1483
0.0943867	0.182021	0.246094	0.315323	0.385472	0.467548	0.541547	0.595748	0.659921	0.72374	0.784444	0.887304	1.05782	1.24906	1.52571	1.87107	2.31353	3.20618	4.878	8.22816	11.569	15.0299	18.6918	23.1095	34.9356	64.1401
0.0944848	0.182034	0.246094	0.316078	0.3856	0.467625	0.541653	0.595924	0.660014	0.727863	0.785916	0.887994	1.05798	1.24912	1.52647	1.87347	2.31703	3.21656	4.88482	8.23243	11.6082	15.0556	18.6948	23.3265	35.012	64.9198
0.094577	0.182271	0.246094	0.316884	0.387154	0.468193	0.542462	0.596409	0.660925	0.728797	0.786795	0.894346	1.05802	1.24936	1.53122	1.87353	2.3192	3.25218	4.90338	8.26437	11.6324	15.0842	18.7177	23.334	35.3541	64.9666
0.0946259	0.182871	0.246094	0.317351	0.387251	0.468335	0.542851	0.596412	0.665542	0.731483	0.787158	0.896151	1.06222	1.24991	1.53464	1.87419	2.32412	3.25332	4.91661	8.27256	11.6865	15.0867	18.7565	23.3632	35.4769	65.116
0.0946415	0.183274	0.246094	0.317464	0.387273	0.468357	0.542969	0.596776	0.666266	0.731665	0.787731	0.896371	1.06377	1.25131	1.53466	1.87771	2.33011	3.26255	4.92167	8.27256	11.7064	15.1403	18.7749	23.4352	35.6443	65.1865
0.0946474	0.183279	0.246094	0.318371	0.387505	0.469452	0.543248	0.597718	0.667107	0.731782	0.788243	0.897408	1.06961	1.25372	1.53799	1.87914	2.33146	3.29615	4.92384	8.34977	11.7223	15.208	18.8122	23.4361	35.6538	65.5793
0.0947729	0.18394	0.246094	0.318469	0.387994	0.469531	0.543415	0.598122	0.668057	0.733097	0.788869	0.898674	1.07071	1.25398	1.53897	1.88501	2.33437	3.30169	4.92802	8.35632	11.7905	15.2695	18.8876	23.4484	35.8105	65.8787
0.0948471	0.184567	0.246094	0.318599	0.388438	0.469621	0.543754	0.598501	0.668187	0.73312	0.789797	0.899758	1.0731	1.25436	1.54124	1.88571	2.33465	3.31962	4.92802	8.36719	11.8209	15.3291	18.8943	23.4755	35.8291	65.924
0.0948918	0.184909	0.246094	0.318632	0.388581	0.469704	0.544496	0.600645	0.669559	0.733924	0.793922	0.900785	1.07376	1.25484	1.54397	1.88649	2.33878	3.32048	4.92802	8.37066	11.8486	15.3488	18.8981	23.5071	35.9023	66.1228
0.095051	0.185036	0.246094	0.318777	0.388852	0.469744	0.545049	0.601241	0.670751	0.734725	0.794543	0.901003	1.07536	1.25484	1.54401	1.88907	2.35072	3.32341	4.92812	8.3997	11.8764	15.3626	18.9636	23.5184	36.0925	66.6748
0.0950528	0.185153	0.246094	0.318801	0.389046	0.470214	0.54558	0.601302	0.674717	0.734995	0.796849	0.901815	1.07848	1.25484	1.54409	1.88907	2.35679	3.32932	4.9344	8.42301	11.8941	15.4403	18.9684	23.5842	36.4668	67.2395
0.0950898	0.185164	0.246094	0.318899	0.389127	0.470327	0.545617	0.603974	0.674888	0.73577	0.797392	0.902282	1.08056	1.25565	1.54699	1.89024	2.36436	3.32968	4.93569	8.43171	11.9254	15.4874	19.1639	23.7069	36.6168	67.4528
0.0951038	0.185195	0.246094	0.320184	0.390411	0.470552	0.545831	0.60493	0.675141	0.735815	0.798777	0.903589	1.0846	1.25606	1.5484	1.89107	2.38142	3.34343	4.94642	8.47506	11.9476	15.5008	19.1945	23.7189	36.6229	67.5694
0.0951372	0.185688	0.246094	0.320908	0.391899	0.470643	0.547306	0.606556	0.675231	0.73691	0.799058	0.90602	1.08744	1.25724	1.54948	1.89278	2.38266	3.34599	4.96887	8.47506	11.9695	15.5192	19.1954	23.7271	36.7047	67.7256
0.0952019	0.185704	0.246649	0.321811	0.391916	0.470814	0.547365	0.607338	0.6756	0.737049	0.799892	0.90722	1.08812	1.25755	1.55636	1.89733	2.38555	3.34724	4.97694	8.53204	12.0183	15.5643	19.2095	23.7345	36.9043	68.0109
0.0952343	0.186368	0.247023	0.321947	0.39193	0.471095	0.547638	0.607577	0.676203	0.738281	0.800396	0.907378	1.09103	1.25814	1.55643	1.89766	2.38675	3.34724	4.98046	8.57099	12.0363	15.6223	19.2123	23.7363	37.0422	68.8593
0.0952956	0.186781	0.247077	0.322002	0.393024	0.471259	0.547685	0.608021	0.676727	0.738281	0.800698	0.907443	1.09109	1.25963	1.55951	1.89775	2.39076	3.34724	4.9841	8.58169	12.2579	15.6639	19.2504	23.738	37.1693	68.8597
0.0953194	0.186812	0.247306	0.322492	0.393509	0.471765	0.54883	0.608789	0.677279	0.738281	0.801003	0.908119	1.09171	1.26325	1.56483	1.89782	2.39086	3.34753	4.98535	8.58776	12.2965	15.7639	19.2536	23.7745	37.4232	69.4978
0.0953642	0.187323	0.247379	0.322559	0.393622	0.472076	0.548885	0.608951	0.677338	0.738434	0.801764	0.908592	1.09272	1.2648	1.56695	1.89859	2.39157	3.37215	5.00662	8.59246	12.3618	15.8004	19.3586	23.7925	37.4232	70.2156
0.0954075	0.187323	0.247383	0.322693	0.393934	0.472313	0.548961	0.610026	0.677593	0.738977	0.804009	0.908995	1.09321	1.26549	1.56798	1.90978	2.3942	3.38552	5.02284	8.59569	12.3741	15.8887	19.379	23.8281	37.4804	70.4555
0.0954875	0.18755	0.247552	0.322721	0.394014	0.472761	0.549353	0.610241	0.677765	0.741183	0.804064	0.910881	1.09365	1.26562	1.56879	1.90978	2.39436	3.38948	5.04036	8.61013	12.4083	16.0131	19.4482	23.9677	37.8575	70.5066
0.0954932	0.187772	0.247814	0.322806	0.394189	0.473164	0.549934	0.610868	0.677916	0.741705	0.804366	0.910904	1.09368	1.26569	1.56879	1.91027	2.39717	3.39169	5.04541	8.63633	12.4149	16.0433	19.4696	24.2008	37.9567	70.589
0.0955219	0.187825	0.247976	0.323181	0.394406	0.473299	0.550282	0.610924	0.677968	0.741726	0.805806	0.911057	1.09521	1.27092	1.56895	1.91252	2.39863	3.40037	5.05124	8.66057	12.4435	16.0592	19.5408	24.3076	38.0332	70.6688
0.0955853	0.187868	0.248047	0.32369	0.394596	0.473316	0.550282	0.6121	0.67834	0.742427	0.806433	0.914498	1.09554	1.27215	1.56986	1.91666	2.39933	3.41884	5.10255	8.66935	12.4595	16.1224	19.5645	24.3317	38.2362	70.7608
0.0956309	0.187872	0.248047	0.323835	0.394653	0.473495	0.550282	0.61355	0.678464	0.742545	0.806621	0.915359	1.09706	1.2743	1.57447	1.91752	2.40075	3.41915	5.11212	8.68662	12.4772	16.1315	19.6086	24.3854	38.2595	70.9789
0.0956431	0.187891	0.248047	0.323837	0.395222	0.474762	0.550282	0.61366	0.678685	0.742653	0.806881	0.916794	1.09708	1.2778	1.57577	1.91944	2.40164	3.42567	5.11347	8.70073	12.5029	16.2612	19.6095	24.3945	39.442	71.3232
0.095655	0.188043	0.248047	0.324407	0.395636	0.475478	0.550282	0.613883	0.679827	0.742766	0.80698	0.918761	1.10056	1.27822	1.57577	1.92205	2.40515	3.42769	5.1138	8.71381	12.5278	16.2915	19.616	24.4276	39.5922	71.9506
0.0959945	0.188085	0.248047	0.32472	0.395662	0.475686	0.550282	0.614602	0.680126	0.744066	0.807624	0.919722	1.10056	1.27912	1.57579	1.92268	2.40713	3.42932	5.12564	8.72853	12.5735	16.2943	19.6485	24.5219	39.9628	73.4645
0.0960202	0.188542	0.248047	0.324742	0.395811	0.475872	0.550282	0.614909	0.68078	0.744141	0.809801	0.920018	1.10056	1.28325	1.58139	1.92285	2.41292	3.43927	5.12886	8.76507	12.6627	16.3237	19.6829	24.626	40.1579	74.8523
0.0960963	0.188877	0.248047	0.32491	0.396714	0.475991	0.550282	0.615967	0.681612	0.74495	0.809935	0.920889	1.10458	1.28337	1.5871	1.92387	2.41357	3.4404	5.136	8.78386	12.6639	16.3522	19.6837	24.6526	40.3143	75.2874
0.0961106	0.189036	0.248047	0.325328	0.396824	0.476097	0.550304	0.616003	0.681936	0.745173	0.810403	0.92317	1.10532	1.2845	1.58785	1.92526	2.4137	3.45409	5.14442	8.82508	12.683	16.3923	19.7013	24.8412	40.953	76.0828
0.096229	0.189485	0.248047	0.325352	0.396859	0.476685	0.550422	0.616878	0.68195	0.746106	0.81125	0.925479	1.10582	1.28455	1.58789	1.93093	2.41903	3.45839	5.15482	8.85403	12.7388	16.483	19.7014	24.9198	41.2746	76.7564
0.096258	0.189503	0.248208	0.325414	0.397274	0.4768	0.550435	0.617179	0.681977	0.746946	0.811473	0.925934	1.10803	1.28478	1.58827	1.93247	2.4205	3.45966	5.1597	8.86757	12.8063	16.5396	19.8076	24.9892	41.608	77.9623
0.0962934	0.189741	0.24826	0.325426	0.397364	0.477906	0.550547	0.617992	0.682577	0.747331	0.81254	0.926522	1.10813	1.28697	1.5898	1.93528	2.42374	3.46493	5.19009	8.87036	12.8389	16.5451	19.8377	25.2368	41.9667	78.0878
0.0966063	0.189817	0.248359	0.325724	0.397438	0.478155	0.550879	0.618186	0.68272	0.747655	0.813178	0.927502	1.10903	1.28846	1.59066	1.9353	2.42375	3.47424	5.19135	8.87304	12.8487	16.6143	19.8719	25.263	42.0532	78.549
0.0967009	0.18998	0.248507	0.32583	0.397751	0.478289	0.551055	0.618316	0.683285	0.747776	0.81529	0.928538	1.11329	1.29237	1.59294	1.93731	2.42751	3.48029	5.19135	8.87645	12.8504	16.6771	19.8842	25.3896	42.2816	79.0499
0.096795	0.190037	0.248822	0.325988	0.39798	0.478487	0.551768	0.620383	0.684166	0.748401	0.815379	0.934345	1.11339	1.29349	1.5949	1.93877	2.43432	3.48713	5.21446	8.87645	12.8621	16.7042	19.8849	25.4124	42.3031	79.1734
0.0970148	0.190095	0.248839	0.326084	0.398233	0.478809	0.552668	0.621161	0.684289	0.750539	0.815653	0.937114	1.11398	1.29442	1.60226	1.94186	2.43626	3.49123	5.21784	8.91729	12.9965	16.7068	19.9243	25.4475	42.6275	79.3247
0.0970254	0.190171	0.249565	0.326375	0.39828	0.478906	0.552753	0.621678	0.684868	0.750916	0.816134	0.937175	1.11463	1.29512	1.60748	1.94486	2.44399	3.49406	5.23202	8.9528	13.0041	16.7289	19.966	25.5054	42.8203	79.6826
0.097045	0.190172	0.249597	0.326699	0.399159	0.479338	0.552924	0.621714	0.68617	0.751043	0.817089	0.938254	1.11468	1.29742	1.60859	1.94795	2.44817	3.50186	5.24205	8.95795	13.0053	16.7633	19.9726	25.533	42.8302	80.7056
0.0971879	0.190589	0.250052	0.326705	0.399231	0.479616	0.553229	0.621854	0.686465	0.751082	0.81719	0.938358	1.1159	1.29878	1.61023	1.95614	2.4512	3.52353	5.28038	8.97018	13.0523	16.8193	19.9783	25.6194	42.8323	81.2907
0.0973158	0.19063	0.250078	0.326898	0.399423	0.47964	0.553241	0.621921	0.686612	0.751242	0.817316	0.938442	1.1164	1.30206	1.61322	1.95813	2.45557	3.52353	5.30486	8.97362	13.0617	16.8352	19.995	25.6848	43.2544	82.568
0.0973316	0.190694	0.250351	0.327068	0.399631	0.479675	0.553754	0.622578	0.687809	0.752203	0.817432	0.938868	1.1174	1.30226	1.61432	1.95816	2.4573	3.52541	5.32681	9.04645	13.1318	16.884	20.0316	25.746	43.3153	82.7241
0.097383	0.191106	0.250418	0.327105	0.400062	0.479845	0.55465	0.622812	0.690455	0.756444	0.817813	0.939818	1.11775	1.30653	1.61531	1.96091	2.46071	3.5387	5.34405	9.12162	13.1998	16.9403	20.0487	25.7497	43.3886	83.4316
0.0974718	0.19122	0.250558	0.327526	0.400072	0.480069	0.55465	0.623285	0.690672	0.756479	0.818506	0.940378	1.11879	1.30657	1.61811	1.96268	2.46094	3.54072	5.35299	9.18541	13.2157	16.968	20.0766	25.7702	43.4298	85.7809
0.0976143	0.191241	0.25067	0.32755	0.400627	0.480105	0.55465	0.623602	0.690772	0.756924	0.819085	0.941864	1.11964	1.30733	1.61924	1.96303	2.46094	3.54345	5.37409	9.19482	13.2297	16.9697	20.1572	25.9743	43.7701	86.2709
0.097678	0.191497	0.251271	0.327643	0.401345	0.480751	0.55465	0.624235	0.691209	0.758	0.820212	0.943753	1.12078	1.31172	1.62196	1.9657	2.47001	3.54446	5.39576	9.20221	13.2394	17.0441	20.222	25.9918	43.9813	88.0428
0.0977255	0.191633	0.25162	0.328323	0.401599	0.481153	0.55465	0.625316	0.691739	0.758509	0.821116	0.944286	1.12604	1.31225	1.62412	1.96691	2.47321	3.54581	5.42948	9.21283	13.2848	17.057	20.276	26.1895	43.9877	89.1624
0.097735	0.191799	0.25176	0.32837	0.402096	0.481198	0.555001	0.626016	0.69182	0.759239	0.82121	0.945928	1.12725	1.32215	1.62475	1.96875	2.47634	3.55263	5.46417	9.23479	13.3096	17.085	20.2771	26.4554	44.0011	89.5896
0.0982241	0.192026	0.251871	0.328383	0.402452	0.481227	0.555122	0.626084	0.692771	0.759922	0.82169	0.946912	1.12755	1.32424	1.62692	1.96875	2.48047	3.5749	5.50735	9.24664	13.3211	17.0942	20.355	26.5596	44.0673	90.2221
0.0984139	0.192053	0.251878	0.328472	0.402572	0.481259	0.55514	0.626458	0.693188	0.759978	0.821931	0.947874	1.12885	1.32476	1.62701	1.96875	2.48143	3.57551	5.52604	9.26372	13.3391	17.1273	20.4092	26.651	44.3347	90.7422
0.0985021	0.192444	0.252153	0.328929	0.403619	0.481347	0.55539	0.62696	0.693333	0.760021	0.822099	0.949065	1.13064	1.32526	1.62885	1.96875	2.49054	3.58249	5.53027	9.36153	13.4003	17.1605	20.4169	26.6624	44.7023	91.1507
0.098595	0.192552	0.252666	0.329249	0.404038	0.481815	0.556378	0.627396	0.693606	0.760127	0.822729	0.952223	1.13511	1.32526	1.62988	1.97031	2.49116	3.58798	5.53529	9.38431	13.4219	17.2002	20.4643	26.8263	44.7124	92.8768
0.0987297	0.19261	0.252697	0.329417	0.404252	0.481853	0.556503	0.628437	0.694001	0.760284	0.823314	0.953681	1.13588	1.32526	1.63373	1.97706	2.49172	3.59945	5.54048	9.38567	13.6238	17.2176	20.5304	27.1063	44.7891	93.1734
0.0987812	0.192745	0.252738	0.329476	0.405295	0.482107	0.5573	0.630344	0.694339	0.760384	0.826096	0.954242	1.13608	1.32693	1.65085	1.98056	2.49446	3.60186	5.57002	9.45461	13.6253	17.2336	20.5475	27.2151	45.1768	93.2656
0.0988649	0.193041	0.252818	0.329838	0.405451	0.482786	0.557384	0.63089	0.694683	0.761831	0.82646	0.956866	1.13635	1.33118	1.65085	1.98407	2.49546	3.60412	5.57933	9.52497	13.6842	17.2537	20.564	27.3268	45.5014	97.4929
0.0989433	0.193543	0.252926	0.330099	0.405793	0.482909	0.558364	0.631994	0.695231	0.762485	0.826558	0.958389	1.13782	1.33158	1.65115	1.98407	2.49843	3.63353	5.58422	9.54937	13.7283	17.2705	20.631	27.4184	45.8393	98.9887
0.0991023	0.193739	0.253048	0.330175	0.405822	0.482917	0.558586	0.632059	0.695333	0.763987	0.826759	0.958887	1.13817	1.33172	1.6526	1.98542	2.51014	3.63568	5.61719	9.56432	13.7571	17.2985	20.6855	27.4435	46.5124	99.715
0.0992142	0.193953	0.25324	0.330189	0.406407	0.483391	0.559113	0.632157	0.696058	0.764374	0.828316	0.959814	1.1461	1.33234	1.65412	1.98555	2.51039	3.65845	5.61719	9.58503	13.7577	17.3426	20.6893	27.4906	46.6748	99.7615
0.099218	0.194237	0.25353	0.330329	0.407314	0.483566	0.559343	0.632443	0.700134	0.764971	0.829427	0.960444	1.14665	1.33237	1.65461	1.98707	2.51131	3.66515	5.62253	9.61027	13.79	17.3893	20.7409	27.5464	46.9549	100.194
0.0992234	0.19427	0.254372	0.330334	0.407364	0.484113	0.559644	0.632806	0.700412	0.765492	0.829989	0.96281	1.14722	1.33576	1.66109	1.98803	2.51832	3.66963	5.62258	9.62601	13.8164	17.4432	20.7787	27.6108	46.9771	110.975
0.0992253	0.194273	0.254403	0.33039	0.407409	0.48438	0.559982	0.633556	0.70116	0.766189	0.830381	0.964135	1.14899	1.33577	1.66233	1.98803	2.52186	3.68638	5.65338	9.62969	13.8164	17.4857	20.8001	28.0804	47.0642	116.115
0.0993039	0.194353	0.256452	0.330429	0.407417	0.484688	0.559988	0.634681	0.70121	0.767058	0.830815	0.964879	1.15073	1.33642	1.66235	1.99008	2.52894	3.68748	5.6655	9.63248	14.0319	17.5356	20.807	28.0817	47.1315	120.89
0.0993629	0.194402	0.256623	0.330752	0.407794	0.485142	0.560487	0.634779	0.701546	0.76722	0.831588	0.965275	1.15239	1.33763	1.66327	1.99362	2.53071	3.69135	5.68873	9.63732	14.0769	17.5592	20.8147	28.1243	47.4448	124.298
0.0998969	0.194689	0.257631	0.331033	0.407857	0.485317	0.56087	0.636036	0.702598	0.769319	0.831811	0.966701	1.15369	1.3386	1.66733	1.99982	2.53369	3.69217	5.74142	9.66624	14.0861	17.5617	20.8456	28.1492	48.2174	127.38
0.0999211	0.194939	0.257841	0.331166	0.410191	0.485536	0.561761	0.637622	0.703689	0.769597	0.832527	0.968154	1.15497	1.34011	1.67036	1.99982	2.53593	3.70277	5.7458	9.68559	14.1477	17.6293	20.8543	28.1607	48.235
0.10004	0.194995	0.25832	0.331452	0.410956	0.485705	0.562008	0.637797	0.703832	0.769616	0.832852	0.968297	1.15791	1.34044	1.6782	1.99982	2.53629	3.70856	5.74599	9.69839	14.1477	17.7442	20.8878	28.2833	48.6172
0.100233	0.195299	0.258489	0.3315	0.411379	0.48589	0.563032	0.637945	0.706305	0.770501	0.833211	0.968305	1.15862	1.34055	1.67834	1.99982	2.53733	3.72407	5.74791	9.80059	14.2018	17.7529	20.9125	28.4003	49.0654
0.10033	0.19538	0.258688	0.331995	0.411558	0.485908	0.56382	0.63804	0.707129	0.770592	0.834213	0.968853	1.15996	1.34283	1.67866	2.0048	2.55277	3.72914	5.77183	9.80677	14.2671	17.7631	20.931	28.4263	49.1628
0.100711	0.195611	0.258703	0.332058	0.411579	0.486505	0.564358	0.638247	0.707135	0.771032	0.835457	0.969232	1.16073	1.34451	1.68008	2.00502	2.5543	3.73452	5.80802	9.81928	14.3176	17.7782	20.9379	28.6163	49.1761
0.100718	0.195694	0.258719	0.33261	0.411785	0.487099	0.565002	0.638434	0.707468	0.771409	0.836585	0.969318	1.16128	1.3464	1.68324	2.00535	2.5581	3.74354	5.8184	9.84088	14.3404	17.8312	20.9399	28.7123	49.5188
0.100834	0.19624	0.259494	0.333174	0.412296	0.487927	0.56535	0.639095	0.708739	0.771489	0.836748	0.969936	1.16814	1.34643	1.68483	2.01259	2.55832	3.74966	5.82511	9.85111	14.403	17.8346	20.9551	28.8131	49.7109
0.100861	0.196305	0.259571	0.333223	0.412448	0.488244	0.56556	0.639845	0.709493	0.772457	0.836829	0.970628	1.17075	1.34797	1.6874	2.01296	2.56125	3.76219	5.83061	9.90535	14.4212	17.8496	20.9916	28.9602	49.7292
0.100903	0.196426	0.259674	0.334184	0.412607	0.488556	0.565808	0.640714	0.71002	0.772582	0.84037	0.971484	1.17148	1.35494	1.68851	2.01442	2.56566	3.76451	5.83966	9.92034	14.4526	17.8499	21.0383	29.3988	50.304
0.100971	0.196587	0.259785	0.334868	0.413017	0.488643	0.566095	0.64173	0.710786	0.77305	0.841837	0.975591	1.17261	1.3586	1.69173	2.0165	2.56759	3.77356	5.84662	9.92476	14.544	17.8536	21.0636	29.5855	50.541
0.100998	0.197017	0.259946	0.334912	0.413441	0.48885	0.566723	0.642351	0.711341	0.773286	0.841844	0.975978	1.1737	1.35941	1.69416	2.01793	2.56902	3.78209	5.85015	9.93614	14.6172	17.8811	21.1133	29.7119	51.2076
0.101145	0.197058	0.260181	0.335823	0.413452	0.489259	0.567282	0.643434	0.712377	0.775068	0.843198	0.979048	1.17381	1.36216	1.70171	2.01864	2.56929	3.78224	5.86644	9.93699	14.6242	17.9341	21.1203	30.1306	51.6604
0.101176	0.197189	0.260451	0.33657	0.413794	0.489978	0.567663	0.643963	0.71267	0.775094	0.844418	0.980813	1.17473	1.36395	1.70398	2.02131	2.56929	3.78627	5.87025	9.96604	14.6253	17.98	21.1332	30.3685	51.7171
0.101257	0.197343	0.260529	0.33748	0.413918	0.490095	0.569033	0.644178	0.712863	0.77635	0.844566	0.981224	1.17501	1.36604	1.7046	2.02399	2.56929	3.78627	5.87993	10.0216	14.6892	18.0051	21.136	30.4419	51.7336
0.101265	0.197447	0.260948	0.337552	0.413923	0.490556	0.569202	0.645343	0.713013	0.776854	0.846026	0.981327	1.17598	1.36815	1.7057	2.02464	2.56985	3.78627	5.9165	10.0402	14.7612	18.0052	21.2853	30.5106	51.9299
0.101349	0.197468	0.260952	0.337815	0.415084	0.490809	0.569773	0.64565	0.713574	0.778104	0.846598	0.981704	1.17625	1.36898	1.71878	2.02517	2.57829	3.81186	5.95255	10.0417	14.7619	18.0053	21.32	30.5489	51.9817
0.101454	0.197728	0.261662	0.338627	0.415242	0.490859	0.569982	0.645844	0.714084	0.778217	0.846626	0.983936	1.17699	1.37137	1.71982	2.02521	2.5789	3.81498	5.95376	10.0469	14.7697	18.0439	21.4236	30.6112	52.0519
0.101634	0.197877	0.261674	0.338633	0.416315	0.491032	0.570582	0.645973	0.714139	0.778217	0.846859	0.985705	1.18008	1.37354	1.72266	2.02581	2.58005	3.8193	5.97034	10.0856	14.8236	18.0517	21.4494	30.6995	52.6209
0.101635	0.198053	0.261674	0.338761	0.416777	0.491433	0.570598	0.64599	0.714544	0.780664	0.847125	0.9865	1.18189	1.37471	1.72266	2.02625	2.58147	3.8204	5.99498	10.0928	14.9161	18.0631	21.5317	30.7858	52.6917
0.101887	0.198414	0.261919	0.340298	0.41689	0.49208	0.57093	0.646045	0.715794	0.781253	0.847323	0.986908	1.1834	1.37722	1.72266	2.02849	2.58525	3.84411	6.00791	10.1453	15.0016	18.0693	21.5346	30.9682	52.7762
0.101998	0.198654	0.261989	0.340863	0.417882	0.492188	0.571041	0.64708	0.716257	0.78227	0.847553	0.987029	1.18347	1.38168	1.72266	2.02934	2.59036	3.85774	6.00792	10.1467	15.0509	18.0951	21.5733	30.986	52.8053
0.10222	0.198705	0.262131	0.340935	0.419075	0.492188	0.571054	0.648057	0.717249	0.782807	0.847674	0.991381	1.18348	1.38596	1.72505	2.02967	2.59254	3.87046	6.03306	10.1533	15.0859	18.1218	21.6072	31.0165	52.8609
0.102247	0.198769	0.262266	0.341004	0.420245	0.492188	0.572303	0.648267	0.718606	0.783523	0.847893	0.991477	1.18351	1.3882	1.7253	2.04058	2.59332	3.8849	6.05311	10.2391	15.1217	18.1768	21.8755	31.1042	53.2698
0.102299	0.19882	0.26228	0.341794	0.421064	0.492188	0.572491	0.648496	0.720468	0.783908	0.852928	0.999041	1.18437	1.38922	1.73429	2.04146	2.59588	3.89108	6.11063	10.2772	15.1403	18.1786	21.934	31.4154	53.3212
0.10243	0.198904	0.262361	0.341835	0.421213	0.492188	0.57294	0.653985	0.720622	0.784393	0.853135	0.999043	1.18556	1.38946	1.7383	2.04323	2.59803	3.89108	6.11284	10.2818	15.1689	18.1893	21.9517	31.5126	53.3785
0.102439	0.198977	0.262564	0.341995	0.421423	0.492188	0.573419	0.654207	0.722527	0.784611	0.853522	0.9999	1.18747	1.39027	1.74015	2.05048	2.60165	3.90914	6.13498	10.3066	15.2003	18.2176	21.9757	31.6456	53.44
0.102441	0.199116	0.263192	0.342113	0.421942	0.492188	0.57407	0.654433	0.723184	0.784675	0.853841	1.00459	1.1876	1.39095	1.74015	2.05658	2.6123	3.91448	6.15234	10.3307	15.2255	18.2406	21.9991	31.7117	53.6247
0.102529	0.199337	0.263984	0.34228	0.422323	0.492188	0.575816	0.655143	0.723851	0.78524	0.854504	1.00624	1.18775	1.39145	1.74015	2.05691	2.61758	3.92048	6.16709	10.3389	15.2515	18.2922	22.0322	31.7394	53.8185
0.102543	0.199368	0.264465	0.342428	0.422662	0.492188	0.5759	0.655872	0.723968	0.785757	0.854588	1.00679	1.18902	1.39212	1.74015	2.06126	2.62095	3.93869	6.172	10.3443	15.267	18.2922	22.0969	31.7795	54.1188
0.102699	0.199385	0.26458	0.343803	0.4229	0.492188	0.576256	0.656311	0.723969	0.786795	0.855586	1.00837	1.19009	1.39212	1.74229	2.06206	2.62111	3.94518	6.17607	10.3491	15.2895	18.321	22.1143	31.8293	54.293
0.102914	0.199689	0.264951	0.344238	0.423059	0.492188	0.576708	0.657101	0.72421	0.787024	0.855784	1.01076	1.19047	1.39212	1.7424	2.07412	2.6302	3.94518	6.17852	10.3505	15.291	18.3531	22.2149	31.9012	54.3326
0.103067	0.199767	0.264976	0.344285	0.423175	0.492188	0.576818	0.657852	0.725923	0.787336	0.859909	1.01123	1.19296	1.39283	1.74716	2.07639	2.633	3.94589	6.19565	10.3506	15.2927	18.3742	22.2891	31.9696	54.5844
0.103093	0.199963	0.265104	0.345098	0.423726	0.492422	0.577164	0.65814	0.727012	0.788335	0.86232	1.01192	1.19323	1.39292	1.74734	2.0827	2.63871	3.94746	6.23848	10.3506	15.3291	18.4226	22.2933	31.9992	54.7336
0.10311	0.200061	0.265315	0.345267	0.424269	0.492547	0.578223	0.658202	0.727567	0.788376	0.862399	1.01442	1.19398	1.3938	1.74766	2.08613	2.6395	3.9573	6.25319	10.3702	15.3453	18.4557	22.3101	32.002	55.2419
0.103231	0.200139	0.26549	0.345447	0.424831	0.492626	0.578336	0.658249	0.728278	0.788528	0.869345	1.01467	1.19456	1.39527	1.74789	2.08727	2.65095	3.9668	6.28599	10.397	15.3646	18.4898	22.3139	32.0077	55.2524
0.103354	0.200271	0.26568	0.345467	0.424884	0.492806	0.57847	0.658884	0.72872	0.78936	0.869591	1.01467	1.19766	1.39532	1.74902	2.08729	2.66191	3.96814	6.29459	10.4293	15.3861	18.4984	22.3447	32.4348	55.3842
0.10368	0.200387	0.265818	0.34648	0.425068	0.492939	0.578671	0.659684	0.728748	0.789606	0.870023	1.01467	1.20212	1.39841	1.75161	2.09457	2.66191	3.97577	6.31622	10.5106	15.3893	18.519	22.4756	32.7765	55.7764
0.103693	0.200663	0.265888	0.346576	0.425882	0.493056	0.578696	0.65999	0.730393	0.789761	0.871094	1.01467	1.20371	1.40334	1.75438	2.09896	2.67473	3.98415	6.38422	10.5177	15.4135	18.5212	22.4924	32.7774	55.9283
0.103748	0.200697	0.26598	0.346733	0.426688	0.493975	0.580283	0.66059	0.730507	0.792258	0.872125	1.01467	1.20401	1.41092	1.75637	2.09945	2.67481	3.99949	6.41809	10.5677	15.4383	18.5609	22.6675	33.0353	55.9283
0.103883	0.200742	0.266194	0.347055	0.426742	0.49417	0.580403	0.660973	0.732515	0.793045	0.873207	1.01467	1.20448	1.41444	1.76004	2.09996	2.67611	4.00091	6.44089	10.5795	15.4961	18.5712	22.6724	33.0406	56.0473
0.104112	0.200825	0.267075	0.347073	0.426973	0.494523	0.581505	0.661438	0.733549	0.795323	0.873546	1.0148	1.20644	1.42243	1.76019	2.1028	2.68139	4.00612	6.45927	10.6078	15.5039	18.6347	22.7119	33.047	56.1833
0.104118	0.201183	0.267154	0.347556	0.427363	0.495549	0.581712	0.661447	0.734123	0.795607	0.873787	1.01591	1.20766	1.42291	1.76514	2.10885	2.68639	4.00617	6.45967	10.667	15.5741	18.6613	22.8782	33.1177	56.2935
0.104539	0.201331	0.267453	0.347655	0.427461	0.496073	0.581778	0.6616	0.734346	0.797575	0.87393	1.01628	1.20839	1.42381	1.76549	2.11698	2.68664	4.00862	6.48386	10.6725	15.6216	18.6691	22.8815	33.2852	56.3603
0.104664	0.201596	0.267599	0.347912	0.427732	0.496094	0.581908	0.661679	0.734572	0.79813	0.87416	1.01784	1.20938	1.42453	1.76856	2.1171	2.70619	4.01488	6.4912	10.6847	15.6284	18.7513	22.9031	33.2982	56.5002
0.104813	0.201726	0.267737	0.348029	0.428008	0.496094	0.582774	0.661691	0.734729	0.79872	0.874649	1.0187	1.21206	1.42531	1.77171	2.1173	2.70703	4.02051	6.49706	10.6896	15.6779	18.8316	22.9134	33.3998	56.5802
0.104876	0.202151	0.267889	0.348029	0.428353	0.496094	0.582819	0.662088	0.735122	0.79876	0.87558	1.01909	1.21617	1.42581	1.77276	2.1176	2.70891	4.06409	6.50172	10.7371	15.7127	18.8447	22.9678	33.5338	56.6219
0.105091	0.202156	0.268185	0.348029	0.428592	0.496094	0.583274	0.66233	0.73659	0.800312	0.877192	1.01933	1.21911	1.42662	1.77323	2.11819	2.71115	4.06439	6.51289	10.7659	15.7928	18.874	23.0031	33.709	56.7055
0.105096	0.202169	0.268555	0.348029	0.428876	0.496094	0.583413	0.662463	0.736917	0.800837	0.877685	1.01942	1.22042	1.42956	1.77461	2.12319	2.7127	4.07278	6.52699	10.8393	15.9491	18.9157	23.0778	33.8919	56.8567
0.105143	0.202244	0.268684	0.348029	0.42893	0.496094	0.583735	0.66274	0.737498	0.80092	0.881543	1.01988	1.2205	1.43312	1.77461	2.12462	2.71653	4.09582	6.54794	10.8467	15.9896	18.9494	23.1762	33.8928	57.2147
0.105191	0.202295	0.268945	0.348029	0.429001	0.496094	0.585242	0.662841	0.73774	0.800968	0.881772	1.02007	1.22155	1.43474	1.77461	2.13232	2.71795	4.10373	6.54978	10.8647	16.0264	18.9556	23.3173	33.9685	57.2465
0.10521	0.2024	0.269044	0.348029	0.429728	0.496291	0.586113	0.662947	0.737935	0.801508	0.882257	1.02101	1.22475	1.43949	1.77517	2.13378	2.71822	4.10705	6.55839	10.8721	16.0641	19.0164	23.3632	34.1049	57.3918
0.10531	0.202651	0.269104	0.348029	0.429806	0.49668	0.586699	0.663157	0.738281	0.806854	0.882479	1.02143	1.22739	1.43991	1.77532	2.14616	2.71902	4.10999	6.57263	10.8935	16.0644	19.1166	23.3658	34.369	57.4481
0.105765	0.202828	0.269627	0.348029	0.43039	0.497728	0.58741	0.663432	0.738281	0.807188	0.885047	1.02272	1.2275	1.44446	1.77727	2.14627	2.72121	4.12528	6.59249	10.9506	16.1663	19.127	23.493	34.4197	57.648
0.105801	0.203007	0.269642	0.348029	0.430428	0.497942	0.587899	0.663816	0.738281	0.80723	0.88525	1.02301	1.22917	1.44616	1.77733	2.15821	2.72877	4.1333	6.59268	10.9684	16.1843	19.1625	23.5785	34.4434	57.7006
0.10589	0.203199	0.269944	0.348029	0.431019	0.498171	0.58914	0.664548	0.738281	0.80844	0.886317	1.02827	1.22977	1.44635	1.77763	2.15952	2.73221	4.15691	6.59465	10.9776	16.2291	19.1896	23.5976	34.4754	57.7651
0.105975	0.203321	0.270327	0.348029	0.43189	0.498361	0.590442	0.664992	0.738281	0.808505	0.886706	1.03047	1.2303	1.45039	1.7804	2.16181	2.74119	4.15802	6.61255	11.0643	16.2648	19.1969	23.6162	34.4925	57.7949
0.10609	0.203691	0.270449	0.348029	0.432008	0.498542	0.590634	0.665268	0.738281	0.808654	0.887304	1.03107	1.23047	1.4512	1.782	2.1723	2.75141	4.16423	6.61255	11.0827	16.2659	19.2392	23.6749	34.5663	57.9095
0.10611	0.203707	0.270565	0.348029	0.432367	0.49917	0.590672	0.665432	0.738281	0.808892	0.887304	1.03163	1.23047	1.45463	1.78478	2.17378	2.75637	4.16775	6.61354	11.0913	16.2739	19.271	23.7192	34.6162	57.9953
0.106462	0.20381	0.27072	0.348029	0.432624	0.500149	0.590923	0.665612	0.738281	0.809944	0.887304	1.03222	1.23047	1.45691	1.78647	2.1745	2.76138	4.18845	6.63872	11.1044	16.2887	19.2823	23.728	34.695	58.3299
0.106487	0.203865	0.27083	0.348029	0.433246	0.500657	0.590938	0.666508	0.738829	0.810085	0.887644	1.03503	1.23047	1.45838	1.78755	2.1884	2.77209	4.19083	6.64677	11.1076	16.3079	19.2893	23.7528	34.8941	58.3995
0.106622	0.2041	0.271181	0.348029	0.433489	0.501006	0.591133	0.666708	0.739369	0.810759	0.888952	1.03609	1.23047	1.46402	1.78771	2.19681	2.77999	4.20767	6.65589	11.1206	16.3129	19.2929	23.8506	35.1065	58.457
0.106805	0.204126	0.271579	0.348029	0.433679	0.501224	0.591458	0.667804	0.740244	0.810894	0.889215	1.03624	1.23047	1.46522	1.78869	2.1981	2.7813	4.2183	6.66984	11.1505	16.3333	19.3376	23.8914	35.2129	58.8055
0.106932	0.204227	0.271653	0.348029	0.434147	0.501993	0.592131	0.667949	0.740457	0.813282	0.890183	1.03718	1.23047	1.46636	1.78869	2.19874	2.78131	4.21955	6.67542	11.1705	16.3722	19.3839	23.9687	35.3357	59.0747
0.107062	0.204526	0.27176	0.348029	0.435087	0.502348	0.592136	0.668785	0.741328	0.81361	0.89092	1.03834	1.23208	1.46712	1.79036	2.19998	2.78386	4.2291	6.68376	11.1975	16.383	19.4189	24.0009	35.5238	60.2869
0.107151	0.204574	0.271821	0.348029	0.435953	0.502567	0.593565	0.669054	0.741745	0.814472	0.896204	1.03885	1.23461	1.47037	1.79128	2.20458	2.78633	4.23396	6.71956	11.2191	16.385	19.4524	24.0651	35.8155	60.3171
0.107192	0.204578	0.272134	0.348029	0.436363	0.502601	0.593661	0.669804	0.742306	0.814754	0.896371	1.03898	1.23629	1.47245	1.79229	2.2047	2.79299	4.23638	6.72437	11.2358	16.5414	19.4927	24.1356	35.8325	60.4419
0.10728	0.204613	0.272627	0.348171	0.436655	0.502786	0.593732	0.669863	0.742465	0.814781	0.896405	1.03976	1.23881	1.47553	1.79752	2.20895	2.7957	4.23863	6.73807	11.2555	16.5543	19.5021	24.1481	35.8905	61.4861
0.107286	0.204635	0.273119	0.348546	0.436714	0.503522	0.594227	0.670143	0.742529	0.814803	0.896413	1.04038	1.23891	1.47677	1.79882	2.21318	2.80272	4.24213	6.7575	11.2904	16.5837	19.524	24.1806	36.1955	61.5761
0.107372	0.204758	0.27358	0.349121	0.436799	0.504171	0.594288	0.670319	0.742983	0.814828	0.896558	1.04409	1.23951	1.4772	1.8022	2.2186	2.80481	4.2448	6.76063	11.2952	16.5904	19.5393	24.3268	36.3241	62.002
0.107417	0.205158	0.273805	0.34928	0.437054	0.504453	0.595167	0.670794	0.743431	0.815903	0.896737	1.04419	1.23966	1.47893	1.80774	2.2186	2.8059	4.24953	6.7685	11.3129	16.6401	19.5467	24.3494	36.6664	62.0747
0.107493	0.205306	0.273937	0.349296	0.437946	0.504782	0.595301	0.670988	0.744056	0.816155	0.898056	1.04439	1.24023	1.47994	1.80924	2.2186	2.8059	4.25681	6.78781	11.3883	16.6456	19.5913	24.4427	36.8222	62.2369
0.107525	0.205387	0.274355	0.349461	0.438199	0.50479	0.595326	0.671127	0.744141	0.816247	0.899717	1.04679	1.24126	1.48067	1.81119	2.2186	2.8059	4.27652	6.7888	11.4189	16.6655	19.6301	24.5465	36.9303	62.4004
0.107636	0.20544	0.274462	0.349658	0.438287	0.505078	0.597164	0.672409	0.744263	0.81656	0.901931	1.0472	1.24342	1.48336	1.81225	2.2196	2.8059	4.27841	6.79248	11.4191	16.6909	19.6413	24.5473	36.9346	62.6167
0.107653	0.205768	0.274553	0.349934	0.438531	0.505131	0.597739	0.672928	0.744266	0.817343	0.903798	1.04821	1.24356	1.48397	1.81276	2.22011	2.81179	4.28312	6.80662	11.5349	16.6981	19.6423	24.6194	37.1582	62.8079
0.107654	0.205802	0.274755	0.350705	0.439064	0.505679	0.597971	0.673749	0.744662	0.817378	0.903992	1.04909	1.2444	1.49082	1.81435	2.22052	2.81975	4.29784	6.81725	11.5623	16.7199	19.6614	24.6517	37.2017	62.8827
0.107675	0.205901	0.274806	0.350761	0.439094	0.506446	0.598515	0.673853	0.745077	0.818512	0.904073	1.04928	1.24451	1.49185	1.81675	2.22129	2.83088	4.3146	6.84637	11.5935	16.7579	19.6706	24.6535	37.2438	63.1306
0.107685	0.205958	0.275517	0.350791	0.439095	0.506993	0.598562	0.674496	0.745511	0.818545	0.904581	1.04998	1.24486	1.49211	1.81889	2.22836	2.83433	4.32879	6.86686	11.6302	16.7912	19.6868	24.6825	37.4655	63.1483
0.107712	0.206205	0.275744	0.350791	0.439589	0.508677	0.598987	0.675652	0.746837	0.819676	0.907378	1.05077	1.24765	1.49693	1.81991	2.22847	2.83652	4.33992	6.87007	11.6623	16.8283	19.6913	24.8047	37.6375	63.6742
0.10784	0.20664	0.276054	0.350791	0.439726	0.509148	0.599047	0.675779	0.747635	0.820087	0.908026	1.05093	1.2507	1.499	1.8208	2.22997	2.83689	4.35384	6.87364	11.7013	16.8807	19.6968	24.8158	37.8076	63.7464
0.107886	0.206656	0.276251	0.351479	0.439985	0.510365	0.599381	0.675886	0.748305	0.820237	0.90807	1.05168	1.25187	1.50245	1.82316	2.23061	2.83716	4.35837	6.8752	11.7543	16.9173	19.7266	24.8477	38.2808	63.7829
0.10789	0.206726	0.276434	0.351933	0.441527	0.511195	0.599687	0.67606	0.748344	0.822093	0.908727	1.05626	1.25236	1.50981	1.82345	2.23132	2.84112	4.36079	6.89028	11.7545	16.9427	19.7434	24.9831	38.2966	64.5041
0.107912	0.20689	0.276511	0.351939	0.441598	0.511296	0.599955	0.676864	0.749811	0.823544	0.909339	1.0579	1.25464	1.51453	1.82404	2.23242	2.85076	4.37577	6.90824	11.7554	16.9662	19.7576	25.1926	38.6375	64.7877
0.107912	0.20695	0.276588	0.352026	0.441625	0.511345	0.600351	0.677063	0.750181	0.823612	0.911264	1.06019	1.25484	1.51572	1.82955	2.24285	2.86614	4.39768	6.91101	11.7647	16.9679	19.7702	25.2552	38.7664	64.8964
0.107994	0.207244	0.276605	0.352573	0.441999	0.513482	0.60052	0.677188	0.750238	0.824428	0.911598	1.06092	1.25484	1.51791	1.83012	2.24479	2.86866	4.40819	6.91162	11.8007	16.9707	19.8332	25.3468	39.6356	65.2344
0.10814	0.207548	0.277194	0.35299	0.442532	0.513741	0.600558	0.677916	0.751108	0.824511	0.911601	1.06159	1.25484	1.52221	1.83234	2.24481	2.88229	4.4104	6.93443	11.8151	16.9965	19.8651	25.3736	39.8801	66.1319
0.108182	0.208624	0.277207	0.353443	0.442754	0.513844	0.602372	0.677999	0.752741	0.824693	0.911647	1.06317	1.25484	1.5252	1.83468	2.24602	2.8927	4.4127	6.97933	11.8377	17.057	19.8651	25.4045	40.4267	66.2095
0.108297	0.208862	0.277852	0.354924	0.442782	0.514004	0.602935	0.678334	0.753158	0.825823	0.912299	1.0639	1.25671	1.52657	1.83638	2.24625	2.89281	4.42529	6.98266	11.8534	17.0729	19.9375	25.5477	40.483	66.2267
0.108355	0.208929	0.277881	0.355052	0.443763	0.514416	0.602939	0.679702	0.753173	0.826556	0.915979	1.06564	1.25807	1.5281	1.84139	2.25313	2.9065	4.43258	6.99589	11.9575	17.0759	19.9539	25.5729	40.5637	66.7854
0.108382	0.20904	0.278819	0.355442	0.443996	0.515115	0.60303	0.6813	0.753703	0.826695	0.916058	1.06687	1.25883	1.5322	1.84151	2.25341	2.9304	4.43652	7.00395	12.0385	17.0994	19.9714	25.6129	40.6062	66.8524
0.108541	0.209293	0.279766	0.355751	0.444674	0.515334	0.603415	0.68145	0.753707	0.82671	0.916326	1.0677	1.26343	1.53369	1.84365	2.2548	2.93132	4.43652	7.02635	12.0686	17.1277	20.027	25.6878	40.8731	67.2719
0.108571	0.209346	0.279808	0.35637	0.445314	0.515558	0.6035	0.682052	0.753934	0.827077	0.916794	1.068	1.26585	1.535	1.84741	2.25666	2.93331	4.44649	7.03068	12.1322	17.142	20.0333	25.6941	40.8968	67.5127
0.108589	0.209363	0.280625	0.356387	0.445519	0.516348	0.604085	0.68316	0.753947	0.828691	0.91721	1.0696	1.26614	1.53811	1.85091	2.26475	2.93554	4.46912	7.0422	12.1716	17.1622	20.0459	26.2898	41.0276	68.2884
0.108608	0.209594	0.280655	0.356693	0.445662	0.516497	0.606391	0.683222	0.75482	0.829804	0.917517	1.0699	1.26684	1.54635	1.85815	2.26567	2.93591	4.49776	7.0448	12.181	17.1681	20.0757	26.3423	41.3479	68.483
0.108639	0.209699	0.280726	0.356897	0.445695	0.517958	0.606758	0.683224	0.756619	0.830128	0.917778	1.07023	1.26883	1.54795	1.8597	2.2667	2.94233	4.5019	7.07557	12.206	17.1742	20.1338	26.3594	41.368	68.9577
0.108719	0.210124	0.280833	0.357256	0.445861	0.518446	0.606877	0.683593	0.756706	0.83154	0.918557	1.0708	1.26925	1.54848	1.86236	2.26871	2.96336	4.50652	7.07966	12.2157	17.1799	20.1494	26.4242	41.6299	69.119
0.108769	0.210175	0.28134	0.357284	0.446299	0.518521	0.607082	0.683746	0.756924	0.831818	0.921531	1.07229	1.26961	1.5503	1.87096	2.26887	2.96336	4.52438	7.08617	12.2293	17.185	20.1857	26.5058	41.6357	69.5349
0.108771	0.210192	0.28141	0.3573	0.446311	0.518963	0.607406	0.684369	0.757163	0.833148	0.92525	1.07689	1.27127	1.55079	1.87168	2.26887	2.97273	4.5292	7.10269	12.2527	17.1878	20.2231	26.6601	41.7649	69.6514
0.108786	0.210211	0.281489	0.357654	0.446369	0.519246	0.607667	0.684896	0.757227	0.833176	0.925743	1.08015	1.27219	1.55141	1.87245	2.27513	2.98342	4.53774	7.10983	12.2768	17.1971	20.2336	26.763	41.8359	69.8451
0.108807	0.210572	0.282252	0.358118	0.447777	0.519283	0.608092	0.685454	0.75775	0.834426	0.926032	1.08092	1.27255	1.55639	1.87419	2.27587	2.99323	4.53774	7.13444	12.3047	17.2002	20.3009	26.8803	41.8707	70.1709
0.109004	0.210689	0.282531	0.358308	0.44824	0.51938	0.608265	0.685461	0.758628	0.835125	0.927507	1.08189	1.27286	1.5574	1.87487	2.27666	2.99386	4.54515	7.15412	12.3145	17.2019	20.347	26.916	41.8848	70.742
0.109155	0.210888	0.282832	0.358577	0.448384	0.51993	0.60849	0.685892	0.759277	0.835559	0.92966	1.08218	1.27573	1.55806	1.87529	2.27741	3.00396	4.56098	7.1748	12.3626	17.2337	20.3775	26.9891	41.9328	70.9106
0.109293	0.210935	0.282836	0.35952	0.449952	0.520408	0.608919	0.685963	0.759575	0.835779	0.930425	1.08239	1.28046	1.56178	1.87753	2.28192	3.00556	4.56393	7.18443	12.4522	17.2357	20.4013	27.1637	42.1798	71.3994
0.109443	0.211058	0.283233	0.360406	0.450135	0.520414	0.609497	0.686102	0.759592	0.835906	0.930489	1.08535	1.28157	1.5632	1.88177	2.28356	3.0057	4.58926	7.22685	12.4557	17.2467	20.416	27.2881	42.4207	72.15
0.110023	0.211366	0.283311	0.360455	0.450307	0.520928	0.609767	0.687061	0.760537	0.836829	0.930729	1.08548	1.28219	1.56515	1.8828	2.28581	3.02314	4.59161	7.24202	12.4706	17.275	20.4623	27.386	42.5294	72.4118
0.11013	0.211543	0.28342	0.360586	0.450344	0.523805	0.610193	0.687271	0.761934	0.837139	0.932283	1.08678	1.28227	1.56669	1.89521	2.28807	3.04219	4.59741	7.24498	12.4851	17.2933	20.478	27.5343	42.5856	72.5612
0.110155	0.212073	0.284036	0.360604	0.450456	0.523997	0.610266	0.687394	0.762324	0.837973	0.933385	1.08744	1.28275	1.56976	1.90466	2.28949	3.04374	4.59741	7.25762	12.5024	17.3173	20.5147	27.6358	42.707	72.5743
0.110283	0.212178	0.284218	0.3608	0.450792	0.524116	0.610366	0.687781	0.763359	0.838108	0.935528	1.08806	1.28354	1.57577	1.90929	2.30115	3.04401	4.6028	7.26287	12.565	17.3461	20.5605	27.6368	42.805	75.0332
0.110452	0.213048	0.284434	0.361246	0.451584	0.524955	0.610898	0.687971	0.764027	0.839448	0.936036	1.08832	1.28407	1.57577	1.90961	2.30184	3.04569	4.62244	7.29667	12.5789	17.3642	20.5853	27.7256	42.8655	75.5202
0.110494	0.213098	0.284548	0.361616	0.452289	0.525581	0.61112	0.688797	0.766431	0.839837	0.938327	1.08888	1.28816	1.57577	1.91002	2.30411	3.06275	4.62689	7.30447	12.5988	17.4014	20.6463	27.8001	43.0692	76.4134
0.110611	0.213526	0.284843	0.361631	0.45239	0.525626	0.61157	0.68929	0.767379	0.840914	0.93836	1.08963	1.29071	1.57577	1.91203	2.30601	3.06684	4.67798	7.30447	12.6002	17.4748	20.6785	27.8074	43.088	76.7513
0.110703	0.21358	0.284903	0.362168	0.45317	0.525899	0.613164	0.689455	0.767657	0.841404	0.938778	1.09209	1.29217	1.57577	1.91216	2.31444	3.06889	4.68348	7.34168	12.6217	17.5142	20.7118	27.8122	43.2369	76.9866
0.110733	0.213673	0.285871	0.362316	0.453396	0.527068	0.613286	0.689744	0.767748	0.841774	0.93935	1.09218	1.29308	1.57577	1.9146	2.31969	3.08317	4.68741	7.34318	12.7332	17.5655	20.7504	27.8314	43.5853	77.2413
0.110745	0.214006	0.285896	0.362324	0.453446	0.52883	0.613578	0.689858	0.768497	0.842578	0.939381	1.09255	1.2932	1.57577	1.91719	2.32164	3.08413	4.6999	7.35658	12.7707	17.6001	20.7524	28.0894	43.8142	77.8502
0.111156	0.214125	0.28621	0.362368	0.453471	0.528941	0.61379	0.692252	0.768593	0.846474	0.940011	1.09292	1.29685	1.57578	1.91732	2.32373	3.10807	4.70003	7.37311	12.8063	17.6074	20.7858	28.1075	43.9386	78.0505
0.111211	0.214268	0.286752	0.362387	0.453726	0.52898	0.614925	0.693678	0.768806	0.846859	0.940044	1.09458	1.29774	1.57596	1.92205	2.32445	3.11287	4.7005	7.3746	12.8486	17.6298	20.8072	28.2922	44.1458	78.2582
0.111223	0.214342	0.286752	0.363133	0.45419	0.529712	0.616006	0.69383	0.769678	0.846937	0.942115	1.09484	1.29814	1.57626	1.92205	2.32693	3.11287	4.70161	7.38281	12.8818	17.651	20.872	28.4665	44.1668	78.2605
0.111261	0.214556	0.286808	0.363232	0.454867	0.530054	0.61705	0.694479	0.770183	0.848744	0.944573	1.09612	1.30069	1.57997	1.92205	2.32914	3.11287	4.70161	7.38519	13.0222	17.6726	20.8762	28.5642	44.695	78.7103
0.11127	0.214645	0.287324	0.363455	0.454881	0.530148	0.617357	0.694771	0.770252	0.848925	0.945749	1.09735	1.30177	1.58137	1.92205	2.33166	3.12101	4.70625	7.38691	13.043	17.6794	21.0627	28.5872	45.1916	79.0953
0.111287	0.214705	0.287699	0.364932	0.455057	0.530719	0.61816	0.695304	0.77111	0.849489	0.950383	1.0982	1.30615	1.58533	1.92331	2.33465	3.1279	4.70771	7.38907	13.0617	17.6794	21.0804	28.7017	45.3709	79.6857
0.111371	0.214837	0.287723	0.36507	0.455313	0.53102	0.61846	0.695783	0.771574	0.850154	0.950393	1.09968	1.30646	1.58606	1.92432	2.33465	3.12929	4.70975	7.39152	13.0809	17.7161	21.1249	29.0401	45.4383	79.8592
0.111524	0.215335	0.287798	0.365545	0.456035	0.531385	0.619365	0.695884	0.774718	0.851765	0.951012	1.10056	1.30747	1.58827	1.93091	2.33598	3.14067	4.72778	7.39176	13.1009	17.7256	21.1276	29.1281	45.5011	80.2677
0.111675	0.215448	0.288181	0.365944	0.456334	0.531774	0.620238	0.696058	0.775719	0.853841	0.951827	1.10056	1.31089	1.58827	1.93395	2.33811	3.15097	4.72953	7.4139	13.1366	17.7281	21.3495	29.1632	45.6309	82.0825
0.111684	0.215488	0.288229	0.366031	0.456357	0.533406	0.620402	0.697882	0.776349	0.854532	0.952796	1.10152	1.31176	1.59176	1.9341	2.34492	3.15154	4.73371	7.42182	13.1447	17.7532	21.4265	29.1987	45.7761	82.1102
0.111746	0.216108	0.288366	0.366293	0.456518	0.533682	0.620698	0.697962	0.776496	0.854542	0.952818	1.10153	1.31209	1.59413	1.94249	2.35146	3.17659	4.7366	7.45217	13.1767	17.7663	21.4476	29.2466	46.3623	83.6806
0.111773	0.216328	0.288911	0.367424	0.456669	0.533918	0.621257	0.699746	0.777685	0.855813	0.954859	1.10205	1.31385	1.59542	1.9433	2.35265	3.21013	4.74806	7.45691	13.1907	17.7837	21.4556	29.484	46.6216	83.724
0.111922	0.216384	0.289045	0.367559	0.456889	0.534355	0.621425	0.69987	0.778164	0.85583	0.957233	1.10291	1.31492	1.59607	1.94486	2.35643	3.21131	4.75184	7.48465	13.2297	17.8504	21.4896	29.5703	46.9807	85.3012
0.112021	0.216848	0.289122	0.367749	0.456984	0.535078	0.621953	0.700028	0.778171	0.856358	0.957563	1.10375	1.31723	1.59707	1.94703	2.36483	3.22786	4.75373	7.50081	13.2444	17.8525	21.4908	29.659	46.9916	86.281
0.112048	0.217113	0.289332	0.367962	0.457528	0.535544	0.622069	0.700103	0.778217	0.856579	0.957597	1.10397	1.31881	1.59899	1.95089	2.37224	3.23686	4.76832	7.51979	13.2526	17.8562	21.567	29.7507	47.2439	86.6994
0.112118	0.217176	0.289781	0.36815	0.458256	0.535605	0.622424	0.701229	0.778217	0.856629	0.958839	1.10416	1.31884	1.599	1.95209	2.37435	3.2488	4.77828	7.54101	13.2866	17.9178	21.609	29.7897	47.3281	87.1137
0.112141	0.217317	0.289911	0.36855	0.458985	0.535672	0.623208	0.701493	0.778217	0.856758	0.96131	1.10561	1.3194	1.60048	1.95438	2.37586	3.25169	4.78747	7.54852	13.3222	17.9713	21.6206	29.8271	47.9025	88.2544
0.112185	0.21748	0.290158	0.368659	0.459208	0.536638	0.623453	0.703742	0.778217	0.856828	0.963094	1.10595	1.32074	1.60333	1.95524	2.38754	3.27679	4.78988	7.55317	13.3682	17.9846	21.6576	29.8424	47.9802	89.435
0.112259	0.217547	0.290363	0.368968	0.459646	0.538497	0.623478	0.70377	0.778222	0.857479	0.964096	1.10609	1.32254	1.6049	1.95738	2.38813	3.2833	4.79364	7.56347	13.5731	18.0239	21.6967	29.8641	48.1491	90.0733
0.112329	0.217843	0.290395	0.36935	0.460063	0.539638	0.624655	0.703899	0.778954	0.857895	0.964604	1.10629	1.32526	1.60655	1.96223	2.39554	3.29612	4.82285	7.5751	13.5776	18.1481	21.7013	30.0684	48.235	90.1204
0.112351	0.217944	0.290443	0.369406	0.462364	0.540159	0.625967	0.703905	0.780061	0.858187	0.96593	1.10765	1.32526	1.60673	1.96875	2.39986	3.30128	4.82489	7.59709	13.5799	18.1765	21.7485	30.0911	48.2809	91.6636
0.11238	0.218373	0.290599	0.369884	0.463006	0.540327	0.626116	0.703917	0.780783	0.859644	0.966885	1.1093	1.32526	1.60716	1.96875	2.40059	3.30169	4.8409	7.59966	13.638	18.198	21.9861	30.3468	48.9568	91.7389
0.112492	0.218472	0.290618	0.370237	0.463007	0.540776	0.626318	0.705827	0.781019	0.860568	0.967069	1.10993	1.32526	1.6127	1.96952	2.40491	3.30169	4.87001	7.60046	13.7174	18.2576	22.0578	30.3566	49.289	95.1451
0.112712	0.218553	0.29065	0.370322	0.464037	0.541173	0.626351	0.706174	0.781405	0.862029	0.967683	1.11037	1.3257	1.61432	1.96975	2.40806	3.30769	4.87692	7.60107	13.7262	18.2773	22.2345	30.783	49.3478	96.5817
0.112942	0.21856	0.290737	0.370844	0.464124	0.541549	0.627106	0.706337	0.78196	0.862654	0.967923	1.11132	1.32778	1.61466	1.98407	2.40835	3.30936	4.8775	7.60878	13.7464	18.3097	22.2377	30.8076	49.4312	97.5879
0.113047	0.218703	0.290797	0.371026	0.464146	0.543708	0.627285	0.707592	0.783604	0.863324	0.968417	1.11507	1.3282	1.61589	1.98407	2.41009	3.31456	4.87935	7.61984	13.7483	18.3227	22.2436	30.9099	49.5496	98.782
0.113059	0.21881	0.290949	0.371076	0.464618	0.544214	0.628071	0.709343	0.784389	0.863648	0.969321	1.11639	1.3296	1.62445	1.98558	2.41432	3.31933	4.88113	7.64477	13.7763	18.3385	22.2589	30.9156	49.8194	99.1394
0.113184	0.218898	0.290983	0.371198	0.464671	0.544474	0.628148	0.709498	0.784393	0.86566	0.969856	1.11764	1.32969	1.62515	1.98853	2.4147	3.32055	4.90945	7.64477	13.801	18.3692	22.2703	30.9304	49.8606	99.2591
0.113403	0.218994	0.291026	0.371576	0.465002	0.544584	0.628162	0.709536	0.785822	0.867366	0.970095	1.11798	1.33096	1.6282	1.9893	2.41978	3.33029	4.91415	7.66399	13.801	18.3715	22.3205	31.0101	50.1029	105.002
0.113444	0.219104	0.291062	0.371644	0.46559	0.544781	0.628495	0.709698	0.785964	0.867404	0.970554	1.11867	1.33227	1.63096	1.9896	2.42374	3.33713	4.92265	7.67043	13.801	18.4223	22.3734	31.0248	50.1068	110.411
0.113644	0.219584	0.291347	0.371902	0.466351	0.545978	0.62892	0.710209	0.786166	0.867629	0.970749	1.12016	1.33436	1.63344	1.99561	2.42374	3.34265	4.93416	7.67261	13.8882	18.4368	22.4535	31.0683	50.1644	115.304
0.113733	0.220039	0.291411	0.371929	0.466401	0.547709	0.629236	0.711044	0.787135	0.868037	0.970921	1.12167	1.33528	1.63347	1.99677	2.43307	3.34275	4.93756	7.68821	14.0068	18.4607	22.5263	31.1013	50.2037	118.908
0.113772	0.220136	0.291782	0.37229	0.467286	0.54774	0.632403	0.711514	0.787828	0.870121	0.971915	1.12204	1.33577	1.63382	1.99982	2.43391	3.34724	4.94474	7.68821	14.0769	18.4796	22.5807	31.1213	50.2622	121.106
0.113901	0.220381	0.291998	0.372512	0.467562	0.547742	0.632862	0.711563	0.788073	0.871308	0.972607	1.12208	1.33577	1.63648	1.99982	2.44042	3.35605	4.94597	7.69215	14.1012	18.498	22.5863	31.224	50.3555	124.281
0.11393	0.220478	0.292203	0.373173	0.467716	0.548172	0.633248	0.711619	0.788372	0.871627	0.975385	1.1261	1.3366	1.64001	1.99982	2.44056	3.38678	4.94967	7.70395	14.122	18.534	22.6243	31.2962	50.612
0.114067	0.220796	0.292349	0.373499	0.467941	0.548361	0.633558	0.712442	0.788485	0.872125	0.976881	1.12665	1.33719	1.64334	1.99982	2.44297	3.39377	4.95355	7.70615	14.1256	18.6162	22.7277	31.518	50.6134
0.114102	0.220829	0.293435	0.373835	0.468335	0.548871	0.634445	0.712512	0.788593	0.872708	0.977795	1.13043	1.34101	1.64723	1.99982	2.44298	3.41095	4.95424	7.71549	14.161	18.6253	22.7867	31.6397	50.7239
0.114239	0.221112	0.293964	0.373836	0.468444	0.548932	0.634764	0.712667	0.788908	0.873046	0.978322	1.13154	1.34344	1.65085	1.99982	2.44531	3.41213	4.96329	7.72358	14.1835	18.6377	22.7867	31.6594	50.828
0.114282	0.221276	0.294361	0.374198	0.468799	0.549338	0.637222	0.713267	0.78897	0.87333	0.978738	1.1324	1.34523	1.65085	1.99982	2.44686	3.41884	4.97316	7.73273	14.2467	18.6852	22.8973	31.6609	51.0751
0.114343	0.221287	0.294577	0.374736	0.469112	0.549483	0.637441	0.713379	0.789332	0.873479	0.978875	1.13444	1.34557	1.65261	2.00163	2.44838	3.42021	4.9783	7.77049	14.3073	18.7561	22.9613	31.7642	51.1792
0.114708	0.221461	0.295164	0.375381	0.469466	0.549535	0.637503	0.713556	0.789429	0.874304	0.979987	1.13704	1.34623	1.65298	2.00173	2.45305	3.42769	4.98762	7.78217	14.3238	18.7588	23.0081	31.9131	51.2154
0.11505	0.221803	0.295171	0.375647	0.469766	0.550118	0.63809	0.713717	0.78953	0.875342	0.981024	1.14086	1.34686	1.65298	2.00834	2.46094	3.44685	4.99749	7.79106	14.3508	18.7599	23.022	31.9211	51.2542
0.115441	0.221979	0.295189	0.376127	0.470178	0.550282	0.638516	0.713797	0.790237	0.875475	0.983589	1.14125	1.34768	1.65314	2.00841	2.4647	3.46434	5.01158	7.79428	14.3571	18.8149	23.087	32.0147	51.6889
0.115649	0.22201	0.295202	0.376233	0.470477	0.550282	0.638886	0.714084	0.790777	0.876839	0.983651	1.14181	1.34882	1.65511	2.01323	2.47058	3.479	5.01935	7.84072	14.4235	18.8334	23.0948	32.2189	51.7536
0.11572	0.222031	0.295334	0.377079	0.470499	0.550282	0.639316	0.714348	0.79134	0.877868	0.984375	1.14418	1.34894	1.65703	2.01684	2.47173	3.49261	5.01935	7.84393	14.4485	18.8451	23.1476	32.242	51.7996
0.115741	0.222079	0.295568	0.377104	0.470521	0.550282	0.639992	0.714807	0.792414	0.879124	0.984375	1.14478	1.34985	1.6571	2.02336	2.47321	3.51421	5.02431	7.84816	14.4514	18.9782	23.1566	32.2464	52.1841
0.115761	0.222212	0.295627	0.377142	0.471154	0.550282	0.640538	0.716471	0.794073	0.879145	0.984375	1.14505	1.3504	1.65797	2.02854	2.47321	3.51843	5.04191	7.87824	14.4838	19.0067	23.1751	32.3327	52.4018
0.116019	0.222636	0.295751	0.377583	0.471268	0.550282	0.640573	0.71656	0.794101	0.879472	0.985808	1.14862	1.35183	1.66395	2.02994	2.47321	3.52541	5.06606	7.87884	14.5319	19.0321	23.1814	32.4098	52.7181
0.116029	0.223004	0.295994	0.377641	0.47135	0.550282	0.641318	0.716756	0.794428	0.879812	0.987038	1.15104	1.35236	1.66395	2.03199	2.47595	3.52677	5.0679	7.88257	14.5604	19.0771	23.1979	32.4511	52.9051
0.116165	0.223242	0.29617	0.377851	0.471759	0.550282	0.642043	0.716769	0.796327	0.880007	0.987211	1.15158	1.3538	1.66398	2.03207	2.48372	3.54921	5.0694	7.88289	14.6193	19.0914	23.2628	32.53	53.1365
0.116175	0.223306	0.296332	0.37797	0.472457	0.550953	0.642396	0.716904	0.796748	0.880134	0.987816	1.15487	1.35409	1.66597	2.03585	2.50185	3.55982	5.07335	7.89198	14.6323	19.0983	23.3312	32.6347	53.2513
0.116198	0.223343	0.296344	0.378252	0.472638	0.550981	0.643219	0.717037	0.798285	0.880248	0.988204	1.15517	1.35925	1.66651	2.03743	2.50378	3.56709	5.07509	7.89476	14.6511	19.1453	23.4032	32.6965	53.4177
0.116221	0.223403	0.296724	0.378792	0.472666	0.551353	0.643871	0.71866	0.79909	0.881464	0.988866	1.15577	1.35958	1.66808	2.03786	2.50967	3.5703	5.07944	7.89479	14.6532	19.1652	23.4286	32.9159	53.5722
0.116275	0.223788	0.297008	0.378808	0.472761	0.55147	0.644159	0.718901	0.800304	0.881772	0.990031	1.16103	1.36045	1.67553	2.03859	2.51154	3.57738	5.08649	7.91885	14.6889	19.1689	23.464	33.0169	53.6182
0.116277	0.223829	0.297136	0.37883	0.472871	0.551724	0.644535	0.719153	0.800347	0.881909	0.990961	1.16198	1.3623	1.67813	2.03893	2.51543	3.57838	5.09874	7.91955	14.7028	19.1701	23.507	33.0539	53.8596
0.116541	0.223946	0.29761	0.379102	0.473165	0.551909	0.644674	0.719182	0.80043	0.882745	0.991573	1.16358	1.3626	1.67964	2.0429	2.52151	3.58263	5.11658	7.93628	14.7492	19.1815	23.5343	33.2049	54.0014
0.116672	0.223966	0.29763	0.379409	0.473273	0.55273	0.644779	0.71997	0.801651	0.883151	0.993576	1.16459	1.36478	1.68058	2.04331	2.52451	3.58318	5.1269	7.94892	14.7656	19.2086	23.692	33.6287	54.0118
0.116694	0.2244	0.29798	0.379546	0.473629	0.553013	0.64486	0.720383	0.801679	0.884102	0.994003	1.16716	1.36938	1.68334	2.04889	2.52852	3.58767	5.1748	8.01223	14.8168	19.2323	23.716	33.8218	54.0987
0.116804	0.224546	0.298014	0.379601	0.473663	0.553283	0.645113	0.720394	0.802405	0.884146	0.9943	1.16745	1.37015	1.68618	2.05208	2.53624	3.58872	5.17484	8.03488	14.826	19.2489	23.7247	33.8235	54.2195
0.117003	0.22528	0.298095	0.380434	0.474331	0.554371	0.645844	0.720667	0.804111	0.885343	0.994536	1.16925	1.37365	1.68938	2.05767	2.53946	3.58986	5.17703	8.04617	14.8363	19.2638	23.7791	33.8398	54.3889
0.117039	0.225327	0.298097	0.38117	0.474332	0.554586	0.645922	0.720893	0.805806	0.887199	0.99557	1.16926	1.37446	1.69277	2.05845	2.54255	3.59857	5.20341	8.07658	14.8787	19.2963	23.8193	33.9618	54.414
0.117076	0.225485	0.298413	0.38138	0.47463	0.55465	0.646342	0.721016	0.807188	0.887304	0.995574	1.1699	1.37471	1.69284	2.06059	2.54725	3.59949	5.21184	8.0815	14.9474	19.2969	23.8226	34.2691	54.4852
0.117278	0.225555	0.298762	0.382185	0.474801	0.55465	0.646479	0.721654	0.80848	0.887304	0.996907	1.1705	1.38044	1.69377	2.06464	2.55265	3.6194	5.22738	8.11168	14.9474	19.3501	23.8383	34.4864	54.5842
0.117358	0.22562	0.298793	0.382401	0.475796	0.554943	0.647593	0.721707	0.808862	0.887304	0.998037	1.17066	1.38162	1.6973	2.06502	2.55518	3.63353	5.23461	8.14303	14.9875	19.354	23.8756	34.5285	54.5849
0.117358	0.225701	0.298812	0.386331	0.476817	0.55556	0.647899	0.722297	0.809337	0.887304	1.00038	1.17104	1.38299	1.69981	2.06859	2.55563	3.64737	5.24831	8.19533	15.0019	19.3686	23.9167	34.6379	54.5942
0.1174	0.22598	0.298848	0.386527	0.477325	0.555712	0.647973	0.722329	0.809579	0.888278	1.00082	1.1718	1.38391	1.70473	2.0765	2.56482	3.65224	5.2625	8.23557	15.062	19.443	24.0301	34.6613	54.6537
0.117519	0.22601	0.298998	0.387457	0.477664	0.556051	0.648401	0.722357	0.80975	0.888796	1.00154	1.17361	1.38639	1.70477	2.07813	2.56877	3.65564	5.26286	8.2613	15.0842	19.4684	24.2187	34.6722	54.7533
0.117584	0.226116	0.29927	0.387719	0.478405	0.556396	0.6487	0.723163	0.811114	0.88924	1.00555	1.17661	1.3864	1.70752	2.08097	2.57956	3.65809	5.26417	8.266	15.1544	19.4727	24.3904	34.7892	54.7722
0.117654	0.226176	0.299386	0.387902	0.478869	0.557628	0.649019	0.72363	0.811658	0.890278	1.00624	1.17963	1.38786	1.71224	2.08304	2.58209	3.65845	5.32718	8.2689	15.1623	19.4841	24.4091	34.8247	54.8242
0.117783	0.226209	0.299802	0.388	0.478987	0.5581	0.649171	0.723686	0.813213	0.890338	1.00664	1.1825	1.38877	1.71382	2.08648	2.59482	3.65845	5.34198	8.27854	15.1791	19.4847	24.5184	34.8811	54.9319
0.117818	0.226332	0.299813	0.388155	0.479024	0.55814	0.649997	0.723825	0.813676	0.893447	1.00848	1.1836	1.39212	1.71553	2.09227	2.59775	3.65845	5.37275	8.30971	15.1882	19.4912	24.5994	34.9462	54.9793
0.117947	0.22636	0.300061	0.388265	0.479848	0.55845	0.650921	0.72466	0.814464	0.894626	1.00884	1.18823	1.39212	1.71762	2.0997	2.5987	3.666	5.37757	8.3232	15.1882	19.5035	24.6787	35.0753	55.3848
0.117948	0.226534	0.300598	0.388521	0.480035	0.558911	0.652086	0.72535	0.814811	0.895801	1.00997	1.18989	1.39268	1.71997	2.10088	2.60179	3.6695	5.38642	8.33366	15.2415	19.5258	24.7088	35.0757	55.494
0.117962	0.226696	0.300698	0.388931	0.480313	0.559205	0.652283	0.725522	0.815307	0.897021	1.01109	1.19126	1.39382	1.72077	2.10152	2.60384	3.68554	5.39726	8.33761	15.3181	19.5506	24.7158	35.0991	55.6891
0.118095	0.226726	0.301396	0.389049	0.480396	0.559347	0.652816	0.725831	0.815557	0.898294	1.01467	1.19134	1.39424	1.72191	2.10249	2.60405	3.68655	5.40286	8.3527	15.3198	19.6751	24.8073	35.116	55.9715
0.118096	0.226737	0.301505	0.39047	0.480736	0.559358	0.653035	0.725846	0.815598	0.89859	1.01467	1.19402	1.39479	1.72266	2.10263	2.61543	3.6996	5.40286	8.39634	15.3291	19.6934	24.8096	35.4814	56.1666
0.118118	0.226876	0.301619	0.391443	0.481052	0.559609	0.653147	0.726609	0.815709	0.898939	1.01467	1.19644	1.39491	1.72266	2.10755	2.62233	3.70677	5.42094	8.3997	15.3519	19.6994	24.8963	35.5339	56.281
0.118138	0.226949	0.301776	0.392002	0.481773	0.559708	0.654202	0.72722	0.815926	0.899258	1.01467	1.19677	1.39729	1.72403	2.11152	2.62451	3.70727	5.42171	8.40281	15.3622	19.7013	25.0211	35.8168	56.4864
0.11824	0.227209	0.302021	0.39277	0.48201	0.559894	0.654422	0.728035	0.817852	0.900266	1.01496	1.19738	1.39793	1.72552	2.11222	2.62608	3.7126	5.43578	8.43044	15.3752	19.7301	25.1716	35.9331	56.4929
0.118247	0.227453	0.302096	0.392998	0.482128	0.559978	0.654566	0.728943	0.818074	0.901568	1.01597	1.19742	1.40077	1.72673	2.11698	2.63085	3.71527	5.44531	8.45003	15.3917	19.7709	25.1899	35.9513	56.7544
0.1188	0.227555	0.30213	0.393831	0.482822	0.560407	0.655097	0.730741	0.818953	0.902027	1.01652	1.19859	1.40747	1.73058	2.11757	2.63337	3.72407	5.46417	8.45045	15.4177	19.8864	25.2188	36.1099	57.1049
0.118803	0.227667	0.302315	0.393839	0.482866	0.560724	0.655153	0.731484	0.820105	0.902465	1.01678	1.19865	1.4089	1.73287	2.11825	2.6337	3.72407	5.46904	8.45284	15.4592	19.8975	25.4051	36.1579	57.1565
0.118831	0.22792	0.302884	0.394506	0.48323	0.560868	0.655736	0.732279	0.820421	0.903273	1.01735	1.201	1.41077	1.73465	2.11866	2.63594	3.72772	5.48697	8.45716	15.4663	19.9031	25.452	36.3936	57.2263
0.118847	0.227969	0.303292	0.394568	0.483313	0.560968	0.65626	0.732556	0.820965	0.904009	1.0181	1.20303	1.41147	1.73473	2.11972	2.63695	3.73109	5.49718	8.55417	15.4917	19.9298	25.5254	36.394	57.846
0.118965	0.228009	0.303416	0.394624	0.483414	0.562244	0.656637	0.732898	0.821227	0.904221	1.01951	1.20471	1.41285	1.73615	2.12542	2.63802	3.73804	5.50282	8.56697	15.4961	19.9574	25.5594	36.4752	57.9095
0.119227	0.228023	0.303429	0.395407	0.483418	0.562485	0.657455	0.732998	0.82244	0.905002	1.021	1.2128	1.41371	1.74015	2.126	2.63857	3.74606	5.50282	8.57099	15.5458	19.964	25.6143	36.873	58.0009
0.119498	0.228026	0.303701	0.395569	0.483432	0.563367	0.657968	0.733129	0.822635	0.90577	1.02165	1.2128	1.41624	1.74015	2.12899	2.64116	3.77582	5.50832	8.58274	15.5588	20.0064	25.6374	37.6451	58.3995
0.119571	0.228095	0.303964	0.395663	0.483655	0.563722	0.658332	0.73313	0.824184	0.905897	1.02179	1.21499	1.41871	1.74015	2.13353	2.64234	3.78014	5.53027	8.58511	15.5663	20.0902	25.7372	37.8128	58.5155
0.119581	0.228107	0.303992	0.395858	0.483917	0.563961	0.660287	0.733188	0.82422	0.906105	1.02192	1.21597	1.42531	1.74082	2.13365	2.6451	3.79011	5.54122	8.61663	15.5838	20.1304	25.781	37.8576	59.2105
0.119821	0.228259	0.304115	0.395964	0.483937	0.564505	0.661341	0.733393	0.824386	0.906859	1.02272	1.21638	1.42724	1.74115	2.13378	2.64806	3.81835	5.55363	8.6408	15.65	20.171	25.7891	38.1024	59.4382
0.120016	0.228295	0.304309	0.396465	0.484746	0.565095	0.661447	0.734572	0.824796	0.907069	1.02364	1.2168	1.42962	1.74161	2.13514	2.65195	3.8204	5.5639	8.65367	15.6652	20.19	25.832	38.4324	59.6908
0.120035	0.228335	0.304373	0.396489	0.484748	0.565374	0.661639	0.734872	0.825123	0.907203	1.02572	1.21728	1.43168	1.74232	2.1357	2.65196	3.82654	5.56847	8.66935	15.6666	20.2241	25.8773	38.4765	59.7988
0.120093	0.228848	0.304651	0.396966	0.485366	0.566171	0.662318	0.735136	0.825568	0.908537	1.0292	1.21804	1.43496	1.74258	2.13578	2.65347	3.82931	5.60862	8.67485	15.6731	20.2957	25.9022	38.7024	59.8372
0.120305	0.229113	0.305076	0.397425	0.485584	0.567088	0.662501	0.736098	0.826043	0.909873	1.03026	1.21836	1.43496	1.74474	2.1372	2.65629	3.84351	5.6118	8.72682	15.6738	20.3946	26.0356	38.8898	59.8456
0.120473	0.229239	0.305412	0.397688	0.485986	0.567193	0.66298	0.737589	0.828028	0.909877	1.03315	1.2184	1.43496	1.75008	2.13735	2.6588	3.84987	5.6118	8.72853	15.6768	20.4727	26.1686	39.1568	60.0316
0.120494	0.229245	0.305458	0.397983	0.486171	0.568753	0.663503	0.738153	0.829062	0.909976	1.03507	1.21891	1.43496	1.75127	2.14103	2.66191	3.85834	5.63419	8.75207	15.7383	20.5392	26.3973	39.3698	60.1001
0.120566	0.229341	0.305828	0.398057	0.487194	0.56979	0.663946	0.73828	0.829582	0.910206	1.03591	1.21983	1.43496	1.75238	2.14137	2.66191	3.86409	5.63636	8.76328	15.7442	20.5458	26.4194	39.433	60.1323
0.120706	0.229386	0.305855	0.398067	0.487237	0.570361	0.666019	0.738281	0.829725	0.910361	1.03883	1.22178	1.43496	1.75512	2.14271	2.66191	3.86561	5.64394	8.78379	15.7673	20.5633	26.4765	39.6791	60.237
0.120934	0.229468	0.306165	0.398544	0.487271	0.570757	0.666193	0.738281	0.829769	0.911024	1.03912	1.22217	1.43752	1.75682	2.14289	2.66522	3.86579	5.6655	8.81693	15.783	20.5682	26.5257	39.6814	60.3913
0.120967	0.229546	0.306307	0.398957	0.48733	0.570913	0.667173	0.738281	0.829949	0.911217	1.0418	1.2229	1.43756	1.75971	2.14409	2.66559	3.86774	5.66853	8.87029	15.7912	20.5809	26.5422	39.8497	60.7902
0.121011	0.229801	0.306442	0.399076	0.488893	0.571852	0.667481	0.738281	0.830053	0.913419	1.04248	1.22393	1.44098	1.76159	2.1448	2.66665	3.87505	5.6936	8.87652	15.7945	20.6068	26.5722	39.8671	61.6451
0.12115	0.230005	0.30646	0.399286	0.490407	0.571924	0.667505	0.738281	0.831588	0.914467	1.04364	1.2241	1.4454	1.76432	2.14505	2.66872	3.88255	5.69832	8.89008	15.8072	20.625	26.6835	39.9349	61.7881
0.121181	0.230094	0.306709	0.399312	0.490457	0.572543	0.667541	0.738281	0.831703	0.91532	1.04406	1.2248	1.44547	1.76496	2.14578	2.67115	3.88255	5.71643	8.92515	15.849	20.6323	26.7044	40.1254	62.1874
0.121288	0.23019	0.306802	0.39941	0.490506	0.57306	0.667733	0.738281	0.832367	0.915733	1.04409	1.22522	1.44593	1.76789	2.14651	2.67519	3.88778	5.7252	8.94123	15.8507	20.6372	26.7392	40.2416	62.3427
0.121291	0.230192	0.307194	0.400088	0.490798	0.573164	0.668046	0.73872	0.835902	0.916336	1.04409	1.22587	1.44616	1.76912	2.15079	2.68812	3.89104	5.7343	8.95795	15.9582	20.6512	26.8049	40.3153	62.4197
0.121412	0.230204	0.30794	0.40011	0.4909	0.573616	0.668077	0.739269	0.836335	0.917785	1.04592	1.22711	1.44745	1.77461	2.15121	2.69051	3.89108	5.80086	8.98406	15.9715	20.7096	26.9711	40.3864	62.4551
0.121452	0.230268	0.308242	0.400408	0.491469	0.573717	0.668184	0.739511	0.83664	0.920686	1.04718	1.2281	1.44772	1.77461	2.15173	2.69542	3.89108	5.82595	8.98549	15.9775	20.7688	26.9774	40.6978	62.6779
0.121478	0.230469	0.308334	0.400467	0.491882	0.573822	0.668376	0.739785	0.836829	0.921746	1.04752	1.22834	1.44848	1.77532	2.15372	2.69744	3.89108	5.82619	8.99717	15.9895	20.7985	27.1948	40.7075	62.7053
0.12154	0.230619	0.308568	0.400719	0.492093	0.573947	0.669154	0.740202	0.838038	0.921768	1.04764	1.23029	1.44915	1.77533	2.1555	2.69805	3.89108	5.84958	9.0253	15.9961	20.8827	27.2954	40.7884	63.3623
0.12155	0.23097	0.309538	0.401106	0.492185	0.574116	0.669865	0.740711	0.838581	0.921911	1.04923	1.23047	1.44976	1.77585	2.15806	2.70703	3.89108	5.86325	9.05797	15.9961	20.918	27.3208	40.8943	64.3101
0.121612	0.230996	0.309633	0.401426	0.492188	0.574363	0.670129	0.741054	0.841003	0.923054	1.05096	1.23047	1.45085	1.77963	2.15887	2.71048	3.8921	5.87025	9.08376	16.0011	20.9702	27.336	40.8968	64.3393
0.121728	0.231184	0.309658	0.401928	0.492188	0.574636	0.670216	0.742113	0.841404	0.924313	1.05104	1.23047	1.45152	1.77971	2.15954	2.71736	3.9108	5.87819	9.08926	16.0264	20.9846	27.3616	41.08	64.5046
0.121766	0.231735	0.309912	0.401986	0.492188	0.574641	0.672219	0.742963	0.841871	0.924926	1.05329	1.23047	1.45281	1.78459	2.16005	2.71748	3.91492	5.88268	9.09551	16.0278	20.9928	27.5823	41.1396	64.5967
0.121898	0.231761	0.310012	0.4026	0.492188	0.575507	0.672348	0.74394	0.842008	0.925508	1.05427	1.23047	1.45338	1.78486	2.16102	2.73255	3.91501	5.90116	9.11339	16.0698	21.0206	27.7765	41.1713	64.9114
0.122061	0.231793	0.310153	0.403015	0.492188	0.575727	0.672747	0.744141	0.842144	0.926522	1.05448	1.23047	1.45354	1.78496	2.16698	2.74076	3.92063	5.91206	9.11538	16.0755	21.0565	27.8034	41.3115	65.0225
0.122203	0.23182	0.310371	0.403383	0.492188	0.576409	0.673093	0.744141	0.842451	0.929851	1.05465	1.23047	1.45828	1.78604	2.17185	2.7486	3.92888	5.93734	9.16159	16.1272	21.0636	27.8223	41.5556	65.1034
0.122204	0.231951	0.310705	0.403999	0.492188	0.576471	0.673229	0.744299	0.842815	0.930147	1.05685	1.23087	1.45896	1.78869	2.1735	2.75066	3.93494	5.94572	9.18737	16.1672	21.0917	27.9585	41.6393	65.6368
0.122255	0.23207	0.310798	0.40417	0.492188	0.576516	0.673809	0.744431	0.84332	0.9305	1.05725	1.23371	1.45961	1.78869	2.17536	2.75141	3.93889	5.94688	9.19482	16.1741	21.1009	27.9997	41.6713	65.8185
0.122277	0.232244	0.31113	0.404367	0.492188	0.576948	0.674008	0.744663	0.843721	0.930909	1.06054	1.23375	1.46232	1.79098	2.18068	2.75141	3.93946	5.94712	9.19482	16.2074	21.2681	28.1377	41.9073	66.2522
0.122556	0.232305	0.311156	0.404584	0.492188	0.576992	0.674288	0.744805	0.843899	0.931037	1.06121	1.23412	1.46293	1.79159	2.18423	2.75141	3.94367	5.96179	9.19482	16.259	21.2882	28.1637	41.9655	67.0945
0.122562	0.232592	0.311176	0.4049	0.492188	0.577092	0.675079	0.74482	0.844272	0.932472	1.06324	1.23611	1.46487	1.79159	2.19083	2.76061	3.94518	5.96436	9.19703	16.2694	21.3701	28.3036	42.1855	67.1802
0.122586	0.232825	0.311231	0.405003	0.492188	0.577334	0.675276	0.745171	0.845246	0.934399	1.06337	1.23735	1.46518	1.79159	2.19667	2.76293	3.94715	6.00791	9.20625	16.2962	21.4153	28.4892	42.2441	67.5981
0.122658	0.23283	0.311312	0.40512	0.492613	0.57743	0.676017	0.745329	0.845674	0.93599	1.06378	1.23912	1.46599	1.79181	2.19872	2.76683	3.94851	6.00835	9.26948	16.3017	21.456	28.6993	42.3346	67.6274
0.122778	0.232883	0.312009	0.405218	0.492723	0.578171	0.676378	0.745367	0.845785	0.937332	1.06589	1.24101	1.46706	1.79882	2.20085	2.77361	3.96814	6.02213	9.27137	16.3066	21.4884	28.7598	42.3728	68.0891
0.122943	0.233	0.312167	0.405295	0.493387	0.578281	0.676773	0.745787	0.846039	0.937351	1.06741	1.24284	1.46858	1.79897	2.20434	2.77582	3.96814	6.02271	9.28857	16.3127	21.4888	28.7603	42.7633	68.4355
0.12303	0.233164	0.312418	0.405304	0.493512	0.579176	0.676832	0.745859	0.846501	0.937996	1.06749	1.2432	1.46988	1.80278	2.20479	2.77707	3.96814	6.07305	9.31588	16.319	21.4941	28.7617	42.804	68.5148
0.12322	0.233235	0.312428	0.405584	0.49357	0.579218	0.677063	0.745891	0.846615	0.93818	1.06758	1.24794	1.4722	1.80518	2.21131	2.78195	3.96814	6.07807	9.35258	16.3208	21.6038	28.9073	42.8359	68.694
0.123229	0.233437	0.312728	0.405611	0.495059	0.579611	0.677189	0.746295	0.846626	0.939211	1.06949	1.24829	1.47438	1.80897	2.21257	2.78423	3.96814	6.09299	9.35474	16.3501	21.6098	29.037	43.3431	68.8908
0.123349	0.233584	0.31293	0.405839	0.4953	0.579718	0.679123	0.746798	0.846673	0.939287	1.06949	1.24874	1.47534	1.80916	2.21484	2.78766	3.96916	6.10147	9.3548	16.3722	21.7579	29.1544	43.4191	69.0362
0.123475	0.233826	0.313182	0.406145	0.496065	0.581079	0.67944	0.746854	0.847123	0.939544	1.07148	1.24884	1.47566	1.80926	2.21484	2.79482	3.98859	6.10546	9.36066	16.3919	21.8021	29.165	43.7013	69.2263
0.123496	0.233877	0.314186	0.406427	0.496094	0.581452	0.680139	0.746902	0.847274	0.941485	1.0721	1.24912	1.47656	1.81024	2.2186	2.79586	3.99964	6.1081	9.42253	16.3925	21.8103	29.2311	43.7528	69.55
0.123879	0.234199	0.314213	0.406662	0.496094	0.58259	0.680576	0.747137	0.848614	0.941601	1.07232	1.25169	1.47656	1.81137	2.2186	2.8059	4.00612	6.12753	9.43548	16.3941	21.9023	29.2748	43.7826	69.7969
0.123906	0.234627	0.314643	0.407063	0.496094	0.583241	0.680631	0.747542	0.850299	0.942735	1.07282	1.25349	1.47782	1.82101	2.2186	2.8084	4.00612	6.14502	9.47347	16.4515	21.9337	29.2948	43.8254	70.2941
0.123916	0.234694	0.314864	0.407268	0.496094	0.583972	0.680862	0.747635	0.851915	0.944848	1.07349	1.25391	1.48506	1.8224	2.22121	2.81362	4.01165	6.16709	9.47816	16.4607	21.976	29.3708	44.2544	70.7048
0.123967	0.235759	0.314889	0.40736	0.496094	0.584461	0.681066	0.747774	0.853916	0.945232	1.07599	1.25484	1.48852	1.82323	2.22829	2.82337	4.03869	6.18828	9.49935	16.4922	22.0486	29.4144	44.7838	70.9028
0.124023	0.235923	0.314993	0.407615	0.496351	0.584741	0.681227	0.749042	0.854197	0.946675	1.07852	1.25484	1.49237	1.82355	2.22847	2.82817	4.05319	6.21113	9.52563	16.5676	22.0729	29.4939	45.169	71.4911
0.124023	0.236311	0.315154	0.408022	0.496425	0.585481	0.681355	0.750932	0.854365	0.946912	1.07996	1.25484	1.49384	1.82404	2.22847	2.8397	4.06153	6.21821	9.57176	16.6254	22.0742	29.5405	45.4055	72.0487
0.124034	0.236338	0.315334	0.408278	0.496705	0.585747	0.681549	0.751224	0.854532	0.948244	1.08055	1.25484	1.49419	1.82854	2.22847	2.85377	4.06822	6.22875	9.57238	16.6847	22.1852	29.6827	45.4369	72.8475
0.124037	0.236439	0.315552	0.408915	0.497106	0.586093	0.681554	0.751631	0.854716	0.948344	1.08134	1.25484	1.49447	1.82928	2.23624	2.86125	4.0718	6.23241	9.61027	16.7294	22.2521	29.7404	45.5502	72.9534
0.124043	0.237083	0.315956	0.409147	0.497239	0.586403	0.681747	0.754157	0.855456	0.948396	1.08174	1.25484	1.49518	1.83233	2.23905	2.86138	4.08215	6.25785	9.62933	16.738	22.2835	29.8053	45.5971	73.108
0.124047	0.237227	0.316147	0.40944	0.497348	0.586924	0.682404	0.754242	0.855735	0.948891	1.08177	1.25484	1.49693	1.83425	2.23982	2.86528	4.09227	6.27418	9.66937	16.7405	22.2936	29.8189	45.7761	73.9461
0.124048	0.23726	0.316158	0.410039	0.497751	0.588015	0.682868	0.755442	0.856304	0.950748	1.08608	1.25484	1.49693	1.83972	2.24331	2.86739	4.10825	6.27418	9.68456	16.7633	22.3203	29.8383	46.4236	74.379
0.124166	0.237263	0.316663	0.410119	0.498133	0.588989	0.683488	0.755932	0.856419	0.950882	1.08842	1.255	1.49693	1.84178	2.2445	2.86992	4.12528	6.27418	9.68559	16.7754	22.3447	29.8522	46.4596	74.9435
0.124211	0.237358	0.316761	0.410206	0.499719	0.58938	0.683723	0.756078	0.857127	0.950887	1.08852	1.25542	1.49693	1.84665	2.24768	2.87078	4.12528	6.28572	9.69097	16.7993	22.4577	29.8626	46.4707	74.9524
0.124536	0.237359	0.316778	0.410535	0.500058	0.591194	0.684104	0.756195	0.857145	0.950909	1.08922	1.25569	1.49693	1.84674	2.25329	2.88045	4.1435	6.28706	9.7087	16.8223	22.5807	29.8838	46.5534	75.9094
0.124554	0.237387	0.317653	0.411117	0.500462	0.591316	0.684793	0.756594	0.85792	0.952065	1.08963	1.25836	1.49758	1.84731	2.2583	2.88045	4.17329	6.29388	9.73549	16.8262	22.5848	30.0456	46.7974	75.9202
0.124584	0.237444	0.318111	0.411263	0.500578	0.591476	0.684994	0.756892	0.85792	0.952995	1.091	1.25939	1.49778	1.85395	2.25929	2.88777	4.17491	6.29419	9.75093	16.8278	22.6011	30.0747	46.8723	76.0744
0.124625	0.237709	0.318165	0.411459	0.500637	0.591849	0.685597	0.7569	0.858797	0.9555	1.09123	1.26073	1.49871	1.85505	2.25943	2.8999	4.17635	6.30034	9.77563	16.8588	22.6688	30.105	47.1762	76.1071
0.124664	0.237716	0.318297	0.411829	0.501147	0.5921	0.685676	0.75722	0.860131	0.957122	1.09179	1.26168	1.49978	1.85558	2.25967	2.90071	4.17726	6.30308	9.80059	16.8774	22.8261	30.1756	47.2746	76.2937
0.124672	0.237865	0.319061	0.412219	0.501619	0.592461	0.687862	0.757328	0.860665	0.957185	1.09377	1.26371	1.50048	1.85766	2.25978	2.90418	4.18359	6.34519	9.80622	16.8875	22.8369	30.2414	47.2762	76.3498
0.124695	0.237876	0.319462	0.412771	0.502492	0.593282	0.687921	0.75769	0.861076	0.957625	1.09492	1.2661	1.50354	1.85831	2.26887	2.90708	4.18532	6.35328	9.84375	16.9018	22.8377	30.3263	47.4637	77.2707
0.1249	0.238036	0.320179	0.412972	0.50281	0.594022	0.690823	0.758263	0.862454	0.957697	1.09555	1.26731	1.50368	1.87419	2.26887	2.90989	4.19083	6.36372	9.8714	16.9043	22.8523	30.4284	47.4655	77.4952
0.12495	0.238251	0.320627	0.413703	0.502934	0.595649	0.690936	0.758808	0.862587	0.957933	1.09623	1.26766	1.50539	1.87419	2.26887	2.92735	4.19083	6.38422	9.88611	16.9714	22.8854	30.5703	47.6164	77.7146
0.124992	0.23834	0.320701	0.414073	0.503203	0.597197	0.691077	0.759238	0.862866	0.958037	1.0982	1.26886	1.50554	1.87419	2.27201	2.93325	4.19083	6.38446	9.90508	16.9876	22.8967	30.6858	47.747	77.7972
0.125073	0.23855	0.321041	0.415102	0.503593	0.597515	0.691196	0.759307	0.862878	0.958332	1.0984	1.26917	1.50652	1.87588	2.28605	2.937	4.19267	6.39844	9.91317	17.009	22.9037	30.7596	47.8695	78.1455
0.125221	0.238623	0.321071	0.415436	0.503789	0.597529	0.691872	0.76037	0.863429	0.960566	1.0989	1.26938	1.5084	1.87789	2.29307	2.94127	4.20804	6.41734	9.94161	17.0145	22.919	30.8741	47.8876	79.0513
0.125266	0.238813	0.321261	0.415485	0.50486	0.59855	0.692928	0.760526	0.863935	0.961727	1.10009	1.27094	1.50963	1.88231	2.29938	2.94595	4.21245	6.45967	9.96604	17.0539	22.9764	30.994	48.0401	79.3888
0.125474	0.238848	0.321272	0.416192	0.50537	0.598744	0.69317	0.760622	0.864409	0.962028	1.10056	1.27104	1.51025	1.88641	2.30034	2.95103	4.21263	6.50172	9.97486	17.0806	22.9825	31.1013	48.0898	81.265
0.125561	0.239664	0.321426	0.416253	0.505706	0.598793	0.693514	0.760944	0.865452	0.964027	1.10056	1.27199	1.51258	1.89097	2.30117	2.95264	4.21891	6.539	9.98335	17.0843	23.0042	31.1356	48.3891	81.8146
0.125573	0.239959	0.321466	0.416361	0.505846	0.600222	0.69447	0.761351	0.86684	0.965627	1.10056	1.27244	1.51259	1.89107	2.30274	2.9631	4.23396	6.53983	9.99947	17.0908	23.0147	31.1943	48.418	82.9862
0.125666	0.239968	0.322793	0.417274	0.506372	0.600398	0.696058	0.76264	0.866979	0.96653	1.10056	1.27276	1.51457	1.89118	2.31621	2.96336	4.23941	6.54583	10.0725	17.0982	23.0913	31.2578	48.4599	83.0401
0.125689	0.240064	0.323303	0.417863	0.507028	0.600786	0.696058	0.762641	0.869665	0.966663	1.10084	1.27607	1.51593	1.89217	2.31751	2.96336	4.24824	6.54843	10.1149	17.1061	23.102	31.4172	48.5586	83.9681
0.125747	0.240785	0.323526	0.41821	0.507297	0.600907	0.696058	0.763188	0.870103	0.967971	1.10167	1.27926	1.51729	1.90684	2.32083	2.96336	4.25856	6.56034	10.1168	17.1387	23.2176	31.6165	48.571	85.3211
0.125762	0.241218	0.323853	0.418491	0.507354	0.601633	0.696058	0.763395	0.870354	0.968221	1.10259	1.28241	1.52061	1.90934	2.32164	2.96866	4.27304	6.5655	10.1827	17.142	23.374	31.6608	48.6718	86.583
0.12582	0.2413	0.323938	0.41868	0.507731	0.603773	0.696058	0.763422	0.870601	0.968505	1.10426	1.28314	1.52082	1.91192	2.32164	2.97356	4.28663	6.56948	10.1851	17.2118	23.3828	31.8071	48.7266	86.8603
0.125968	0.241988	0.324064	0.41989	0.508073	0.604902	0.696058	0.764199	0.872375	0.970471	1.10604	1.28418	1.52178	1.91549	2.32206	2.97356	4.29884	6.57004	10.2007	17.2131	23.4107	31.8467	49.0468	87.6881
0.126219	0.241988	0.324172	0.420198	0.508711	0.605235	0.696058	0.764214	0.872558	0.971611	1.10614	1.28447	1.5246	1.91744	2.32285	2.97356	4.30664	6.58313	10.2305	17.2549	23.4737	31.8781	49.184	87.7879
0.126248	0.241995	0.324218	0.420442	0.508715	0.605279	0.696058	0.764652	0.873131	0.971897	1.10797	1.28589	1.52631	1.91844	2.32628	2.97787	4.31206	6.58326	10.2355	17.2727	23.5008	31.9985	49.3588	88.9791
0.126365	0.242166	0.324269	0.421115	0.508742	0.605673	0.696133	0.764856	0.873372	0.972703	1.1093	1.28625	1.52671	1.91987	2.32853	2.99386	4.31498	6.58572	10.2772	17.2959	23.5355	32.1043	49.4214	89.5284
0.126441	0.242882	0.325588	0.421173	0.509071	0.605807	0.696388	0.765661	0.873538	0.973013	1.11119	1.29	1.53101	1.92205	2.3304	2.99484	4.32243	6.61758	10.2933	17.297	23.5475	32.1177	49.6422	89.6177
0.126515	0.243393	0.325829	0.421257	0.509831	0.606057	0.696719	0.766552	0.874552	0.973569	1.11187	1.29096	1.53417	1.92205	2.33233	3.00396	4.32272	6.62171	10.2974	17.3034	23.5683	32.2658	49.8361	92.0144
0.126555	0.243473	0.326026	0.421423	0.510052	0.606684	0.697522	0.768613	0.874925	0.975298	1.11265	1.29253	1.53702	1.92205	2.33277	3.00584	4.33195	6.62628	10.3182	17.3106	23.5923	32.3051	49.9267	92.6411
0.126822	0.243539	0.326157	0.421553	0.510275	0.607186	0.69792	0.76973	0.877025	0.97615	1.11271	1.29513	1.53757	1.92205	2.33298	3.00997	4.33764	6.63086	10.3389	17.357	23.6114	32.4673	50.3435	95.3606
0.12694	0.243668	0.326261	0.421781	0.510811	0.607196	0.698242	0.771046	0.877275	0.97763	1.11323	1.29674	1.53979	1.92205	2.33465	3.0124	4.36066	6.63367	10.3476	17.5042	23.7114	32.489	50.449	96.2431
0.127164	0.243986	0.326364	0.421886	0.51091	0.607359	0.698352	0.771207	0.878092	0.978634	1.11403	1.2968	1.54127	1.92205	2.33465	3.02216	4.36079	6.64833	10.3506	17.5093	23.7192	32.5117	50.4516	97.5627
0.127308	0.244034	0.326795	0.422125	0.511352	0.60809	0.699564	0.771789	0.878349	0.979888	1.1142	1.29711	1.54446	1.92205	2.33465	3.04195	4.38211	6.64849	10.3528	17.5307	23.7479	32.5269	50.5346	98.411
0.127344	0.244042	0.327674	0.422642	0.511682	0.608682	0.700006	0.772	0.878686	0.980443	1.11554	1.29906	1.54655	1.92205	2.33589	3.04401	4.40449	6.65385	10.3575	17.5681	23.8029	32.5361	50.5439	98.4821
0.127523	0.244129	0.327884	0.422837	0.513079	0.608726	0.70028	0.772264	0.878946	0.980514	1.11812	1.29944	1.54712	1.92205	2.34715	3.04725	4.41498	6.66434	10.4136	17.5703	23.9154	32.6422	50.5506	99.0218
0.127523	0.244137	0.328909	0.423358	0.513718	0.609122	0.700451	0.773703	0.87909	0.981629	1.12466	1.30012	1.54783	1.92226	2.34931	3.05302	4.42248	6.67082	10.4184	17.5932	23.9333	32.6934	50.7055	104.444
0.127775	0.244282	0.329249	0.423582	0.51378	0.609131	0.700706	0.775444	0.881318	0.982796	1.12507	1.30172	1.54999	1.92234	2.35409	3.05988	4.43652	6.67887	10.4467	17.5954	23.9345	32.9648	50.7337	109.605
0.127799	0.244798	0.329419	0.423868	0.513963	0.609524	0.700717	0.775768	0.881494	0.983202	1.12512	1.304	1.55034	1.92366	2.35864	3.06911	4.43798	6.69291	10.4567	17.6349	23.9471	33.0805	51.0779	113.322
0.127805	0.244921	0.329478	0.424323	0.514369	0.610326	0.701112	0.775895	0.881632	0.984375	1.12586	1.30416	1.55132	1.92665	2.36276	3.07097	4.43924	6.69738	10.4579	17.6464	23.9529	33.0983	51.1501	115.715
0.127874	0.245224	0.3296	0.42451	0.514409	0.612041	0.701154	0.776037	0.88295	0.984375	1.12648	1.30497	1.55156	1.92811	2.3679	3.11287	4.44801	6.69909	10.4827	17.6982	24.1113	33.3536	51.1668	118.007
0.127898	0.245483	0.329713	0.425309	0.514575	0.612231	0.701339	0.776228	0.883508	0.984375	1.12686	1.30499	1.55492	1.92991	2.36964	3.13226	4.45099	6.69936	10.493	17.7017	24.1895	33.9716	51.6819	121.285
0.12793	0.24555	0.330337	0.425694	0.5146	0.612281	0.701583	0.777685	0.883672	0.984375	1.12821	1.30725	1.55643	1.93282	2.37022	3.14511	4.46191	6.71705	10.5709	17.7335	24.523	34.0959	51.7388	148.907
0.127988	0.24575	0.331281	0.425968	0.516029	0.612493	0.701717	0.778217	0.884758	0.984375	1.12828	1.30749	1.55643	1.93314	2.37231	3.15154	4.4701	6.72367	10.5865	17.7494	24.5378	34.1303	51.7445
0.12803	0.246094	0.331314	0.426263	0.516189	0.61275	0.70182	0.778217	0.884886	0.984375	1.12971	1.30906	1.55647	1.9349	2.37872	3.15404	4.47057	6.74444	10.6202	17.7529	24.5428	34.2212	51.7541
0.128145	0.246094	0.331523	0.426337	0.516304	0.612856	0.70304	0.778217	0.887304	0.984375	1.13184	1.30911	1.55655	1.937	2.37877	3.16241	4.47173	6.76446	10.6311	17.7806	24.5539	34.2286	51.781
0.12815	0.246094	0.333113	0.426395	0.517355	0.613431	0.703685	0.778217	0.887304	0.984375	1.1326	1.30928	1.5574	1.93917	2.38737	3.16455	4.48605	6.7801	10.6575	17.7939	24.615	34.3343	51.8643
0.128441	0.246094	0.334138	0.4267	0.517916	0.61347	0.703763	0.778217	0.887304	0.985811	1.13336	1.30944	1.56098	1.94216	2.39012	3.16551	4.48856	6.7888	10.6598	17.8346	24.6345	34.344	51.9463
0.128458	0.246094	0.334329	0.427137	0.517962	0.613697	0.704654	0.778217	0.887304	0.990501	1.13364	1.30993	1.56179	1.94327	2.39145	3.17655	4.48973	6.78934	10.6662	17.8367	24.6716	34.3828	52.0247
0.128737	0.246094	0.334386	0.42718	0.518232	0.613823	0.704852	0.778414	0.887304	0.990551	1.13465	1.31061	1.56834	1.94496	2.39351	3.18378	4.49079	6.79025	10.6707	17.863	24.7595	34.4146	52.0941
0.129142	0.246094	0.334803	0.42743	0.519457	0.613832	0.7053	0.778626	0.888795	0.993505	1.13492	1.31236	1.57318	1.94517	2.39409	3.1898	4.5017	6.79603	10.6999	17.8818	24.8158	34.6503	52.3093
0.129173	0.246094	0.334902	0.427548	0.52007	0.614143	0.705863	0.77865	0.889299	0.995158	1.13635	1.3132	1.57577	1.94538	2.40381	3.19061	4.51753	6.80147	10.7596	17.9039	24.8334	34.7044	52.4705
0.129281	0.246094	0.334912	0.427931	0.520408	0.614468	0.705878	0.778859	0.889338	0.995254	1.13945	1.31397	1.57577	1.94709	2.4054	3.19786	4.51768	6.80389	10.7945	17.9058	24.9301	34.9349	52.5172
0.129323	0.246094	0.334963	0.428262	0.521173	0.614482	0.706462	0.778975	0.889757	0.996073	1.14217	1.31432	1.57577	1.94988	2.40931	3.19922	4.5235	6.81073	10.8416	17.9637	24.9818	35.1008	52.5374
0.129484	0.246094	0.335232	0.428263	0.52119	0.614512	0.707422	0.779395	0.890922	0.997058	1.14285	1.31455	1.57577	1.95262	2.41222	3.19922	4.53774	6.81632	10.8533	18.073	24.9915	35.1768	52.5656
0.129487	0.246094	0.335402	0.428307	0.521376	0.615499	0.707766	0.779409	0.891531	0.997659	1.14317	1.31537	1.57577	1.95909	2.4165	3.20473	4.54473	6.83769	10.8585	18.1276	25.0228	35.1928	52.5982
0.129498	0.246094	0.335485	0.42909	0.521981	0.615586	0.707864	0.779641	0.892602	0.998183	1.14425	1.31621	1.57617	1.96206	2.41686	3.20867	4.56319	6.83769	10.8783	18.1411	25.1859	35.1942	52.7181
0.12951	0.246094	0.335686	0.430101	0.522461	0.615731	0.708162	0.779674	0.892856	0.999168	1.14444	1.31718	1.57871	1.96373	2.41786	3.22041	4.56627	6.84211	10.8783	18.1634	25.2258	35.2059	52.7384
0.129656	0.246094	0.335793	0.43039	0.522961	0.615763	0.708843	0.780514	0.893	1.00051	1.14539	1.31851	1.57922	1.96514	2.42295	3.23934	4.56758	6.84211	10.8925	18.2126	25.2642	35.4117	53.0339
0.129785	0.246094	0.336248	0.430524	0.523282	0.615995	0.70901	0.780537	0.893184	1.00078	1.14591	1.31882	1.58034	1.96552	2.42374	3.25941	4.56828	6.8573	10.9215	18.2686	25.3866	35.4213	53.0384
0.129803	0.246094	0.336351	0.430565	0.523675	0.616369	0.709177	0.780638	0.893798	1.00216	1.14647	1.31912	1.58556	1.96875	2.42966	3.26706	4.56919	6.86295	10.9328	18.3363	25.6097	35.4765	53.0433
0.130187	0.246094	0.336393	0.430896	0.524243	0.61698	0.709389	0.780745	0.893803	1.00251	1.14806	1.3202	1.58657	1.96875	2.4349	3.27012	4.57026	6.87288	10.9735	18.3429	25.7112	35.6666	53.3881
0.130228	0.246094	0.336443	0.431169	0.524807	0.617171	0.709799	0.781131	0.895091	1.00257	1.14856	1.32059	1.58827	1.97845	2.43699	3.27813	4.57761	6.89502	10.9974	18.3651	25.7318	35.6927	53.5111
0.130287	0.246094	0.336605	0.431271	0.52491	0.618594	0.709901	0.781136	0.896283	1.00269	1.14898	1.32244	1.5892	1.98061	2.43797	3.2833	4.58401	6.90145	10.9987	18.4343	25.7372	35.8313	53.6581
0.1303	0.246094	0.336855	0.431894	0.524966	0.618821	0.710059	0.781157	0.896489	1.00282	1.14929	1.32412	1.59166	1.98149	2.43916	3.29369	4.59025	6.90151	11.0181	18.4494	25.7408	35.8824	53.9579
0.13046	0.246094	0.336899	0.431992	0.525076	0.619395	0.710184	0.781784	0.896833	1.00344	1.1496	1.32526	1.59422	1.98407	2.43977	3.30169	4.59741	6.90818	11.0516	18.4814	25.749	36.0406	54.097
0.130537	0.246094	0.337061	0.432366	0.525642	0.619475	0.711248	0.783002	0.89727	1.00384	1.1511	1.32526	1.59473	1.98407	2.44134	3.31085	4.60206	6.9189	11.0523	18.4847	25.771	36.2368	54.2434
0.130578	0.246094	0.337258	0.432396	0.525931	0.620726	0.711314	0.784393	0.897632	1.00429	1.15158	1.32526	1.59521	1.98407	2.44495	3.335	4.61079	6.91983	11.1712	18.4855	25.7751	36.4825	54.2663
0.130961	0.246094	0.33741	0.432503	0.526092	0.621635	0.711748	0.784393	0.897957	1.00636	1.15231	1.32526	1.59541	1.98407	2.44536	3.34376	4.63688	6.92659	11.1841	18.5257	25.8059	36.7403	54.4574
0.13118	0.246094	0.337459	0.432563	0.526231	0.622101	0.712101	0.788149	0.898402	1.00864	1.15358	1.32526	1.59684	1.9841	2.44838	3.34724	4.65345	6.92845	11.1848	18.5274	25.8082	36.9968	54.9613
0.131211	0.246094	0.337533	0.432629	0.526428	0.62225	0.712871	0.788376	0.899669	1.01099	1.15524	1.32526	1.59926	1.98877	2.44875	3.34724	4.66746	6.93006	11.1926	18.5343	25.8676	37.0688	55.2353
0.131268	0.246094	0.337542	0.433152	0.526749	0.622264	0.713854	0.788899	0.900051	1.01137	1.15529	1.32526	1.59958	1.99078	2.45369	3.35397	4.67174	6.96058	11.2344	18.5501	25.8834	37.0977	55.2885
0.131291	0.246094	0.337798	0.433751	0.527749	0.622365	0.71398	0.789828	0.901352	1.01252	1.15603	1.32958	1.60414	1.99225	2.45398	3.3547	4.67243	6.96058	11.2935	18.5574	26.0302	37.1992	55.3373
0.13142	0.246094	0.338227	0.433782	0.528198	0.622612	0.715034	0.792448	0.901516	1.01337	1.15711	1.32989	1.60423	1.99354	2.46094	3.35661	4.67578	6.96246	11.323	18.5598	26.0801	37.7479	55.8129
0.131517	0.246094	0.338449	0.433992	0.528263	0.622957	0.715379	0.793253	0.901569	1.01441	1.15728	1.3304	1.60435	1.99562	2.46094	3.37228	4.67635	6.96493	11.3529	18.5634	26.1428	37.8552	55.8326
0.131534	0.246094	0.338596	0.434597	0.528318	0.623947	0.716354	0.793571	0.902936	1.01467	1.15751	1.33041	1.60585	1.99581	2.46094	3.3738	4.67839	6.96493	11.3763	18.5953	26.3191	37.8684	56.3267
0.131633	0.246094	0.33863	0.434955	0.529215	0.623965	0.71643	0.793696	0.905176	1.01467	1.1587	1.33084	1.61094	1.99981	2.46479	3.37461	4.69569	6.96493	11.4189	18.6023	26.3431	37.9114	56.349
0.131647	0.246094	0.338896	0.435206	0.529221	0.624603	0.716913	0.795964	0.905728	1.01467	1.1601	1.33165	1.61251	1.99982	2.47789	3.3981	4.70361	6.96928	11.4298	18.6318	26.3814	38.1096	56.3555
0.131719	0.246094	0.3392	0.435552	0.529307	0.625008	0.717211	0.79745	0.907064	1.01467	1.16043	1.33284	1.61377	1.99982	2.48234	3.39993	4.71401	6.96928	11.4675	18.6333	26.5225	38.1423	56.4005
0.131806	0.246094	0.339222	0.435847	0.529311	0.62521	0.717622	0.79749	0.907217	1.01687	1.16116	1.33301	1.61783	1.99982	2.48563	3.40452	4.7264	6.97716	11.4718	18.6594	26.5298	38.1572	56.4816
0.131839	0.246094	0.340304	0.436139	0.529363	0.625235	0.717702	0.797621	0.907691	1.017	1.16154	1.33577	1.61796	1.99982	2.48714	3.41074	4.72731	6.98304	11.543	18.6712	26.5979	38.2016	56.4864
0.131842	0.246094	0.340388	0.436173	0.529807	0.625361	0.71905	0.79829	0.907997	1.01779	1.16194	1.33577	1.61809	1.99982	2.48784	3.41884	4.72731	6.98894	11.5559	18.6714	26.6624	38.5394	56.4864
0.131896	0.246094	0.340512	0.436212	0.529876	0.625472	0.719182	0.799862	0.908844	1.01866	1.16248	1.33727	1.62077	2.00167	2.48973	3.42769	4.73371	6.9953	11.556	18.6852	26.7439	38.6444	56.6689
0.131898	0.246094	0.341004	0.436914	0.529929	0.625763	0.719193	0.801293	0.909727	1.02091	1.16248	1.33822	1.62222	2.00857	2.49057	3.42769	4.74117	6.99768	11.5743	18.7419	26.8242	38.7849	56.8215
0.131985	0.246094	0.34109	0.436963	0.530112	0.62642	0.719288	0.801738	0.909976	1.02126	1.16366	1.34005	1.62259	2.0094	2.49882	3.43684	4.74369	6.99971	11.6707	18.7946	26.8888	38.9168	56.8306
0.132016	0.246094	0.341371	0.437094	0.530412	0.62761	0.72022	0.801745	0.910235	1.02163	1.16755	1.34206	1.62375	2.01268	2.5017	3.4471	4.74412	7.01817	11.6746	18.8203	26.9032	38.9793	57.2294
0.132021	0.246094	0.341426	0.437162	0.530475	0.627853	0.720877	0.801847	0.911063	1.02184	1.16985	1.34855	1.62617	2.0138	2.50255	3.44851	4.74778	7.03845	11.689	18.8304	26.9154	39.1371	57.2317
0.13222	0.246094	0.34158	0.437405	0.53093	0.628697	0.722039	0.802405	0.911213	1.02272	1.16993	1.34926	1.62773	2.01414	2.50685	3.45425	4.754	7.04705	11.7015	18.8451	26.9688	39.2024	57.3834
0.132354	0.246094	0.341824	0.437668	0.531086	0.628926	0.722054	0.804227	0.912197	1.0259	1.17012	1.35023	1.63704	2.01818	2.51399	3.45489	4.75507	7.06417	11.7124	18.9594	26.9967	39.3433	57.6892
0.132475	0.246094	0.341862	0.437698	0.531092	0.629423	0.723156	0.805817	0.912966	1.02617	1.17074	1.35039	1.63859	2.02277	2.51758	3.45711	4.75667	7.07649	11.7136	18.9794	27.0025	39.3639	57.9121
0.132503	0.246094	0.342037	0.43819	0.531243	0.629961	0.723814	0.806596	0.913307	1.0262	1.17318	1.35109	1.64297	2.02285	2.51873	3.46051	4.76953	7.08225	11.758	19.0066	27.1386	39.3888	58.0006
0.132562	0.246094	0.342556	0.438806	0.532133	0.630017	0.724175	0.806866	0.914625	1.02744	1.17325	1.35198	1.64446	2.02514	2.51878	3.48029	4.77828	7.08682	11.8118	19.0194	27.1793	39.4372	58.2488
0.132601	0.246094	0.342589	0.438897	0.532221	0.631005	0.724489	0.807008	0.914937	1.02795	1.17452	1.35246	1.64685	2.02745	2.51917	3.48188	4.78454	7.1389	11.8474	19.0512	27.3208	39.4894	58.4259
0.132616	0.246094	0.342934	0.439155	0.532578	0.632249	0.724949	0.807167	0.916399	1.02903	1.17583	1.35345	1.64909	2.02815	2.52179	3.48689	4.7866	7.16221	11.8658	19.1121	27.3317	40.0026	58.6101
0.132786	0.246094	0.343014	0.439737	0.53265	0.632465	0.725562	0.807531	0.916402	1.0306	1.17593	1.35352	1.64935	2.03404	2.5256	3.49214	4.79058	7.17144	11.8683	19.1318	27.5407	40.0294	58.9586
0.132803	0.246094	0.343189	0.439985	0.532765	0.632939	0.726138	0.808054	0.917155	1.03254	1.17718	1.35381	1.65075	2.03781	2.53369	3.49644	4.79379	7.1736	11.9657	19.1401	27.6481	40.0558	59.0427
0.132851	0.246094	0.343227	0.440621	0.533078	0.632948	0.726333	0.80863	0.917491	1.03308	1.17752	1.35494	1.65226	2.0394	2.53369	3.49765	4.81329	7.18745	11.9892	19.1761	27.7115	40.1337	59.4589
0.132883	0.246094	0.34335	0.440739	0.533189	0.633947	0.726788	0.809552	0.918275	1.03424	1.17886	1.35675	1.65382	2.04058	2.53699	3.49765	4.81341	7.2007	12.0052	19.1859	27.7912	40.4385	59.9022
0.132963	0.246094	0.343623	0.440778	0.533283	0.634204	0.72692	0.810045	0.91945	1.03539	1.18017	1.35865	1.65466	2.04267	2.53869	3.50837	4.8143	7.21718	12.0168	19.2132	27.8929	40.4972	59.9047
0.133075	0.246094	0.344761	0.441177	0.533522	0.63454	0.727033	0.810427	0.920174	1.03551	1.18252	1.35919	1.6566	2.04516	2.54042	3.51135	4.81439	7.2185	12.0239	19.2285	27.9049	40.68	60.1241
0.133077	0.246094	0.345021	0.44197	0.534352	0.63506	0.72717	0.811482	0.920686	1.03587	1.18268	1.35958	1.65778	2.05111	2.5438	3.52353	4.83498	7.23783	12.0686	19.2552	27.906	40.7818	60.1369
0.133119	0.246094	0.345126	0.442756	0.53446	0.636561	0.72762	0.812322	0.921422	1.03642	1.18605	1.35999	1.65917	2.05226	2.54501	3.52353	4.83605	7.23783	12.0818	19.3522	27.9314	40.9093	60.9673
0.133476	0.246094	0.345215	0.44308	0.534738	0.63672	0.727759	0.812397	0.921917	1.03672	1.18613	1.36446	1.66142	2.05347	2.54563	3.52597	4.83846	7.27123	12.0987	19.3981	27.9478	41.0099	61.3239
0.133628	0.246094	0.345222	0.443434	0.535104	0.636924	0.728014	0.813718	0.922195	1.03675	1.18828	1.36584	1.66395	2.05614	2.5463	3.52979	4.84601	7.27148	12.1352	19.4102	27.9825	41.403	61.3845
0.133691	0.246094	0.346136	0.44368	0.535141	0.63706	0.728406	0.813785	0.924183	1.0368	1.18915	1.36643	1.66395	2.0568	2.55064	3.54097	4.86491	7.27992	12.181	19.4136	27.9958	41.4138	61.4693
0.133797	0.246094	0.346278	0.443926	0.535241	0.63741	0.728773	0.814956	0.92525	1.03713	1.19033	1.36834	1.6645	2.05821	2.55262	3.54197	4.87489	7.28778	12.2008	19.4502	28.2971	41.4364	61.8438
0.1339	0.246094	0.34631	0.444292	0.535734	0.638139	0.729071	0.815264	0.926309	1.03714	1.19175	1.37083	1.66726	2.05884	2.55337	3.5429	4.87702	7.29748	12.2141	19.4965	28.4649	41.4392	62.0278
0.133907	0.246094	0.346911	0.445072	0.536393	0.639098	0.729689	0.815374	0.928421	1.03862	1.19238	1.37188	1.66831	2.05894	2.55459	3.5467	4.8776	7.30447	12.2405	19.5286	28.487	41.6015	62.0747
0.133989	0.246094	0.34693	0.445351	0.536528	0.639118	0.729909	0.815732	0.929864	1.039	1.19256	1.37241	1.67084	2.06022	2.5616	3.54921	4.88252	7.31088	12.2536	19.5892	28.4981	41.6299	62.0859
0.134024	0.246094	0.347287	0.445874	0.536541	0.639348	0.73231	0.81644	0.930352	1.04038	1.19403	1.37268	1.67273	2.06414	2.56219	3.55432	4.9013	7.31449	12.3145	19.6227	28.5226	42.3346	62.9365
0.134072	0.246094	0.347498	0.445953	0.537311	0.639351	0.733654	0.817339	0.930824	1.04181	1.19556	1.37437	1.67358	2.06473	2.56399	3.56887	4.91104	7.31828	12.3342	19.7047	28.5435	42.3374	63.5094
0.134333	0.246094	0.347503	0.445955	0.537891	0.639758	0.734347	0.817403	0.931606	1.04193	1.19632	1.37537	1.67534	2.06578	2.56781	3.56919	4.91641	7.32446	12.3587	19.7264	28.6039	42.4289	63.6027
0.134431	0.246094	0.347558	0.446396	0.537906	0.640011	0.734405	0.817503	0.932068	1.04409	1.19765	1.3797	1.67753	2.0676	2.56928	3.57524	4.92188	7.33717	12.3817	19.7702	28.6224	42.6968	63.6827
0.134551	0.246094	0.347763	0.446632	0.538777	0.64019	0.734458	0.818687	0.932639	1.04409	1.19984	1.38057	1.68103	2.068	2.56929	3.57586	4.92311	7.34168	12.4149	19.7717	28.7352	42.7408	63.7383
0.134697	0.246094	0.347902	0.446674	0.539348	0.640286	0.73486	0.82017	0.932673	1.04409	1.20159	1.38187	1.68554	2.0685	2.57055	3.57738	4.92695	7.34445	12.4149	19.7888	28.7841	42.8368	63.8467
0.134706	0.246094	0.347928	0.446849	0.539398	0.641065	0.734869	0.820684	0.933223	1.04462	1.2024	1.3838	1.68698	2.06908	2.57325	3.58101	4.93301	7.3451	12.4442	19.7933	28.8103	42.8917	63.8821
0.134864	0.246094	0.347999	0.44685	0.539687	0.641309	0.735784	0.821491	0.933796	1.04512	1.20713	1.38532	1.69225	2.07281	2.5734	3.58297	4.95075	7.35904	12.4674	19.8536	28.8351	43.1244	64.4841
0.134931	0.246094	0.348029	0.446934	0.539905	0.641404	0.736585	0.821569	0.934608	1.04624	1.20753	1.38661	1.69529	2.07938	2.57671	3.58318	4.95594	7.3785	12.4684	19.8684	28.9273	43.1408	64.5836
0.13494	0.246378	0.348029	0.447111	0.539958	0.642053	0.736627	0.821798	0.93635	1.04669	1.20886	1.38717	1.69666	2.08013	2.58546	3.58836	4.9568	7.38691	12.526	19.8751	28.9406	43.246	65.1101
0.135058	0.246386	0.348029	0.447829	0.540023	0.643786	0.737427	0.824247	0.937147	1.04801	1.20902	1.38773	1.699	2.08207	2.58714	3.59418	4.95684	7.38691	12.5893	19.8981	28.9452	43.4443	65.1397
0.135149	0.246437	0.348029	0.448704	0.542019	0.644228	0.737744	0.824714	0.937494	1.05175	1.20938	1.38788	1.70421	2.08325	2.58819	3.5971	4.96939	7.42345	12.7052	19.9138	28.9849	43.6946	65.2613
0.135273	0.24659	0.348029	0.448858	0.542297	0.644821	0.73785	0.825237	0.937654	1.05242	1.21002	1.38845	1.70513	2.08681	2.59725	3.59916	4.97284	7.42659	12.7201	19.9652	29.0452	43.7057	65.3555
0.135277	0.24659	0.348029	0.449284	0.542381	0.645167	0.738101	0.825424	0.937696	1.0527	1.21069	1.38885	1.70641	2.08817	2.59775	3.60641	4.97621	7.42708	12.7857	20.0219	29.1125	43.7613	66.0337
0.135331	0.246797	0.348029	0.449391	0.542517	0.645412	0.738281	0.82578	0.940224	1.05668	1.21308	1.39263	1.71274	2.08841	2.6042	3.60691	4.98023	7.44001	12.7906	20.1127	29.186	44.3201	66.0426
0.135499	0.246909	0.348029	0.449524	0.542648	0.645534	0.738281	0.826084	0.940314	1.0567	1.21393	1.39277	1.71747	2.09008	2.60537	3.60999	5.0058	7.44209	12.7992	20.1328	29.2663	44.4554	66.2651
0.135573	0.246958	0.348029	0.450404	0.543563	0.645808	0.738281	0.827384	0.941299	1.05822	1.215	1.39296	1.71776	2.09749	2.6082	3.6158	5.01886	7.48393	12.8747	20.134	29.3096	44.5488	66.9467
0.135612	0.247082	0.348029	0.451	0.543639	0.646292	0.738281	0.827712	0.941681	1.05824	1.21506	1.39345	1.72238	2.10035	2.61015	3.62127	5.02173	7.48465	12.8818	20.1812	29.5477	44.6879	66.9958
0.135843	0.247235	0.348029	0.451093	0.543907	0.646793	0.738281	0.828198	0.941841	1.05873	1.21625	1.3938	1.72266	2.10133	2.61194	3.634	5.03817	7.48465	12.9193	20.2324	29.6224	44.7321	67.0305
0.136026	0.247433	0.348029	0.451306	0.544193	0.648154	0.738281	0.828792	0.944313	1.05884	1.21734	1.39538	1.72302	2.10263	2.61211	3.63939	5.04342	7.48465	12.9437	20.2938	29.72	44.7444	67.1327
0.136042	0.247434	0.348029	0.451323	0.544442	0.648179	0.738281	0.829769	0.945451	1.05974	1.21735	1.39638	1.72791	2.10273	2.61295	3.63977	5.04942	7.48742	12.9945	20.3104	29.7336	45.1997	67.3608
0.136066	0.248009	0.348029	0.452482	0.544584	0.648319	0.739024	0.829798	0.945706	1.06056	1.21752	1.39641	1.729	2.10352	2.61601	3.64035	5.05269	7.48967	13.0319	20.3227	29.8292	45.2471	67.415
0.136097	0.248026	0.348029	0.452684	0.544685	0.648499	0.739082	0.829838	0.945724	1.06104	1.21782	1.39669	1.7305	2.10378	2.61601	3.64594	5.05748	7.53323	13.0391	20.3231	29.9028	45.3085	67.4559
0.136216	0.248047	0.348029	0.45372	0.545034	0.648798	0.739429	0.829862	0.947614	1.06212	1.21785	1.39872	1.73176	2.10475	2.61603	3.65845	5.08674	7.54391	13.0913	20.3479	29.9386	45.4521	67.4843
0.136275	0.248047	0.348029	0.45376	0.545293	0.64912	0.739997	0.830869	0.94778	1.06224	1.21864	1.39924	1.7318	2.10968	2.61669	3.67029	5.12088	7.54451	13.1009	20.3561	30.1003	45.7759	67.652
0.136553	0.248047	0.348029	0.453811	0.545297	0.649212	0.740475	0.830898	0.949151	1.06392	1.2195	1.40003	1.7319	2.11145	2.62981	3.67099	5.12615	7.56491	13.1055	20.4325	30.105	45.8402	68.5008
0.136582	0.248047	0.348029	0.454112	0.54551	0.650117	0.740744	0.831951	0.949185	1.06435	1.22031	1.40445	1.73276	2.11681	2.63617	3.67362	5.16253	7.57775	13.1139	20.4482	30.1134	45.851	68.5845
0.136634	0.248047	0.348029	0.454416	0.545931	0.651005	0.740984	0.833046	0.949205	1.06452	1.2211	1.40533	1.73375	2.11698	2.63865	3.68577	5.16876	7.58113	13.1166	20.5692	30.5014	45.9761	68.9189
0.136679	0.248047	0.348029	0.454524	0.546173	0.651238	0.741499	0.833295	0.949517	1.06767	1.22132	1.40619	1.73407	2.11698	2.64809	3.69051	5.16988	7.58855	13.1817	20.6264	30.6045	45.9876	68.9432
0.136745	0.248047	0.348029	0.454792	0.546935	0.651436	0.741936	0.834017	0.950805	1.0677	1.22178	1.40921	1.74015	2.1233	2.65006	3.69104	5.19135	7.60025	13.1845	20.6408	30.8942	46.0467	69.0687
0.136775	0.248047	0.348029	0.455166	0.546969	0.652298	0.742367	0.834045	0.951283	1.06836	1.22186	1.41034	1.74015	2.12624	2.65051	3.69141	5.19135	7.61577	13.2257	20.6606	31.0868	46.0991	69.4582
0.136865	0.248047	0.348029	0.456114	0.547192	0.652964	0.742881	0.834619	0.951827	1.0685	1.22862	1.41186	1.74015	2.1281	2.65051	3.69262	5.1936	7.6374	13.2297	20.6959	31.092	46.1599	70.4383
0.136878	0.248047	0.348029	0.456142	0.547817	0.653287	0.742989	0.83526	0.952019	1.06989	1.22871	1.41209	1.74015	2.12851	2.65051	3.69553	5.1975	7.64195	13.2449	20.755	31.3761	46.2663	70.4716
0.136885	0.248047	0.348029	0.456401	0.54828	0.653577	0.743011	0.836417	0.952625	1.07002	1.2288	1.41493	1.74067	2.12911	2.65051	3.70271	5.21463	7.68821	13.2663	20.7924	31.4408	46.2931	70.4958
0.137027	0.248047	0.348029	0.456491	0.548759	0.653693	0.74365	0.836473	0.953177	1.07017	1.22881	1.41566	1.7413	2.13312	2.65414	3.70605	5.21482	7.68821	13.2856	20.8133	31.4461	46.3213	70.547
0.137064	0.248047	0.348029	0.456829	0.548958	0.653874	0.743852	0.83659	0.953743	1.07167	1.22927	1.41939	1.74159	2.13378	2.65935	3.7095	5.24663	7.69376	13.2982	20.8139	31.5847	46.426	71.193
0.137067	0.248047	0.348029	0.456858	0.549233	0.654547	0.744141	0.837085	0.954235	1.07201	1.23047	1.41985	1.75128	2.13723	2.66191	3.71179	5.24855	7.70395	13.3221	20.8418	31.5864	46.4679	71.374
0.137082	0.248066	0.348029	0.457245	0.549485	0.654568	0.744141	0.837235	0.95536	1.07376	1.23047	1.4199	1.75355	2.14319	2.66191	3.72407	5.25656	7.72358	13.3398	20.8534	31.6643	46.4844	71.6978
0.137315	0.248112	0.348029	0.457505	0.550242	0.654901	0.744376	0.837955	0.955534	1.07644	1.23047	1.42136	1.75522	2.14414	2.67129	3.73123	5.26431	7.7275	13.3453	20.8547	31.7829	46.5872	71.7193
0.137344	0.248193	0.348029	0.45758	0.550282	0.655694	0.744494	0.838683	0.955809	1.07703	1.23047	1.42322	1.75778	2.14709	2.67155	3.74476	5.27376	7.74999	13.382	20.8904	31.8193	46.6373	72.1575
0.137385	0.248245	0.348029	0.457631	0.550282	0.655761	0.744714	0.839288	0.956153	1.07769	1.23047	1.4235	1.75873	2.15064	2.67962	3.74483	5.30102	7.7621	13.4341	20.9057	31.824	46.8723	72.5413
0.137407	0.248436	0.348029	0.457741	0.550282	0.658016	0.745367	0.840437	0.957492	1.07798	1.23047	1.43083	1.7595	2.15173	2.68304	3.75213	5.30102	7.81611	13.4539	20.9426	31.8689	47.4909	72.5939
0.13744	0.249056	0.348029	0.457744	0.550282	0.65833	0.745494	0.840814	0.959252	1.07825	1.23069	1.43485	1.76029	2.15193	2.68839	3.75754	5.31243	7.83668	13.4544	21.0395	31.9818	47.5631	72.8547
0.137446	0.249184	0.348029	0.458266	0.550282	0.658372	0.745698	0.84098	0.960696	1.07919	1.23085	1.43496	1.7613	2.15238	2.69315	3.77204	5.32006	7.86205	13.4714	21.0841	32.1062	47.7003	72.9818
0.137453	0.249275	0.348029	0.458592	0.550282	0.658751	0.745906	0.841101	0.962666	1.07968	1.23221	1.43496	1.76231	2.15375	2.69357	3.77814	5.32237	7.88124	13.5776	21.0847	32.132	47.8197	73.4156
0.137516	0.249284	0.348029	0.458627	0.550282	0.659309	0.746186	0.841229	0.963827	1.0803	1.23307	1.43626	1.76626	2.15429	2.69919	3.80059	5.32382	7.8895	13.5807	21.1261	32.1587	47.8396	74.2327
0.137553	0.249402	0.348029	0.458963	0.550282	0.659767	0.746589	0.841404	0.964239	1.08035	1.23379	1.43768	1.76755	2.15674	2.70416	3.81125	5.32382	7.89128	13.6018	21.1655	32.2449	47.9726	74.9036
0.137571	0.249603	0.348029	0.458975	0.550282	0.661071	0.74705	0.841976	0.966222	1.08037	1.23429	1.44386	1.76931	2.16395	2.70534	3.8204	5.34005	7.90289	13.6443	21.1661	32.262	48.1333	75.3501
0.137571	0.249721	0.348029	0.459004	0.550282	0.661758	0.747102	0.842226	0.96743	1.08131	1.23489	1.44826	1.77415	2.17041	2.70598	3.8204	5.34456	7.92519	13.6488	21.2125	32.2663	48.1743	75.3835
0.137634	0.250294	0.348029	0.459542	0.550282	0.662038	0.747992	0.842292	0.96831	1.08263	1.23801	1.44827	1.77461	2.17236	2.70703	3.82598	5.36408	7.92562	13.6631	21.2229	32.3658	48.3079	75.9236
0.137768	0.250467	0.348029	0.459925	0.550282	0.662045	0.74888	0.844411	0.968666	1.08272	1.23845	1.45485	1.77461	2.17468	2.70703	3.82959	5.36892	7.93268	13.665	21.2294	32.3919	48.3685	76.0347
0.137828	0.250533	0.348029	0.460777	0.550282	0.662317	0.749291	0.845235	0.9689	1.08386	1.23929	1.45934	1.77477	2.17568	2.70703	3.83397	5.36905	7.93628	13.705	21.2993	32.6452	48.3729	77.761
0.138102	0.250989	0.348029	0.461027	0.550282	0.663045	0.749615	0.845248	0.96922	1.08695	1.24052	1.46328	1.7754	2.17592	2.71819	3.83737	5.37334	7.98573	13.7328	21.4066	32.8209	48.5089	78.0276
0.138163	0.251035	0.348029	0.461682	0.550282	0.663103	0.750571	0.847212	0.969939	1.08721	1.24422	1.46716	1.77971	2.17654	2.72694	3.83812	5.38592	7.98921	13.7426	21.466	32.8259	48.7138	78.1203
0.138386	0.251138	0.348029	0.462399	0.550282	0.663467	0.750807	0.847568	0.970225	1.08754	1.24585	1.46811	1.7798	2.1773	2.73612	3.84793	5.39726	7.99429	13.9191	21.483	32.8393	48.7215	78.3135
0.138436	0.25114	0.348029	0.462423	0.550282	0.663764	0.751603	0.847898	0.970353	1.08763	1.24605	1.46886	1.78315	2.18026	2.73687	3.85198	5.40056	8.02283	13.9603	21.4842	33.0662	48.7435	79.0854
0.138503	0.25122	0.348029	0.462448	0.550282	0.664186	0.752227	0.84794	0.97041	1.08784	1.2465	1.47	1.78533	2.18218	2.73985	3.85198	5.40118	8.02687	13.9906	21.4854	33.0701	48.7641	80.8166
0.138528	0.251525	0.348029	0.463022	0.550282	0.664667	0.752584	0.84899	0.970588	1.08961	1.2468	1.47378	1.78869	2.18412	2.74432	3.85583	5.4357	8.04622	14.0305	21.4892	33.1387	48.8442	81.028
0.138643	0.251684	0.348029	0.463774	0.550624	0.664916	0.753565	0.850031	0.970792	1.09053	1.24729	1.47378	1.78869	2.18669	2.74621	3.86102	5.46117	8.05181	14.0465	21.5016	33.2207	48.8505	81.5358
0.138673	0.251841	0.348029	0.46394	0.551245	0.664988	0.75357	0.850383	0.971035	1.09125	1.24736	1.47577	1.78869	2.1941	2.75141	3.87888	5.46671	8.05407	14.0474	21.5725	33.3082	48.8711	82.9581
0.138756	0.251962	0.348029	0.464998	0.551458	0.665313	0.753696	0.851215	0.97209	1.0913	1.24765	1.47675	1.78928	2.19521	2.75141	3.88146	5.47603	8.06121	14.0631	21.632	33.4914	48.9306	83.8747
0.138775	0.251979	0.348053	0.465174	0.552262	0.665321	0.754032	0.851465	0.972682	1.09143	1.24853	1.47681	1.79025	2.20011	2.77023	3.88789	5.47927	8.09566	14.0693	21.6332	33.5131	48.9733	85.1392
0.138829	0.252059	0.348339	0.465255	0.552407	0.665468	0.754203	0.851649	0.972708	1.0915	1.24859	1.47952	1.79158	2.20135	2.77595	3.89108	5.48	8.1147	14.122	21.6362	33.5657	49.1705	85.3552
0.138922	0.252122	0.348838	0.465447	0.55361	0.667003	0.754231	0.851987	0.973701	1.09155	1.24867	1.47986	1.79159	2.20179	2.77714	3.90029	5.49113	8.14252	14.132	21.6658	33.6977	49.2253	85.5363
0.139252	0.252422	0.349125	0.465963	0.554024	0.66701	0.755377	0.8527	0.974442	1.09214	1.24973	1.48122	1.79159	2.20354	2.78728	3.90212	5.50282	8.14402	14.1651	21.6737	33.7032	49.4062	85.5391
0.139258	0.253204	0.349176	0.4666	0.55408	0.667433	0.755921	0.853288	0.975713	1.09342	1.25099	1.4816	1.79159	2.21199	2.79255	3.91435	5.53314	8.14715	14.1794	21.7629	33.7077	49.4085	86.0009
0.13926	0.253288	0.349335	0.46701	0.55465	0.667786	0.757183	0.854529	0.975919	1.09484	1.25256	1.48195	1.79164	2.21259	2.80379	3.9228	5.54636	8.15458	14.1803	21.7652	33.837	49.626	86.0505
0.139319	0.253419	0.349607	0.467051	0.55465	0.668901	0.757193	0.854532	0.975921	1.09612	1.25349	1.48323	1.79329	2.21483	2.8059	3.92394	5.55808	8.16256	14.1812	21.7719	34.0082	49.6416	86.6617
0.139343	0.253867	0.349609	0.467692	0.55465	0.66927	0.757827	0.855342	0.976095	1.09857	1.25355	1.48342	1.79544	2.21484	2.8059	3.93614	5.56006	8.18054	14.1995	21.9037	34.0976	49.8156	86.8993
0.139361	0.253969	0.35057	0.46774	0.55465	0.669994	0.758333	0.855677	0.976816	1.10056	1.25484	1.48382	1.79594	2.21484	2.81665	3.93971	5.56314	8.19975	14.2096	21.9394	34.1163	49.9954	90.3285
0.139463	0.254041	0.350615	0.46788	0.55465	0.670005	0.758572	0.856854	0.977796	1.10056	1.25484	1.48736	1.79869	2.21484	2.82359	3.94242	5.57261	8.22095	14.2097	22.025	34.3926	50.1354	91.913
0.139522	0.25407	0.35075	0.467957	0.55476	0.670089	0.758847	0.856907	0.978302	1.10056	1.25484	1.48819	1.8005	2.21611	2.82562	3.94518	5.57933	8.24284	14.2167	22.0593	34.4357	50.187	92.564
0.139653	0.254221	0.350791	0.468335	0.554942	0.670997	0.759287	0.857086	0.979742	1.10056	1.25566	1.49071	1.80101	2.21769	2.84273	3.94518	5.58734	8.25817	14.2356	22.0907	34.4962	50.2086	92.9446
0.139678	0.254227	0.350791	0.469124	0.555044	0.67116	0.760131	0.857139	0.980723	1.10056	1.25572	1.49122	1.80353	2.2186	2.8524	3.94518	5.60073	8.26046	14.2381	22.1118	34.5488	50.2533	95.4872
0.139683	0.254428	0.350791	0.469594	0.556675	0.671336	0.7607	0.857453	0.981495	1.10056	1.25791	1.49132	1.80565	2.2186	2.862	3.94852	5.61044	8.29456	14.2752	22.1484	34.5534	50.5038	95.7333
0.13973	0.254503	0.350953	0.470529	0.557813	0.67199	0.76172	0.857544	0.98217	1.10119	1.25799	1.49149	1.81207	2.2186	2.86992	3.96148	5.64413	8.35406	14.2868	22.1828	34.6241	50.7007	97.4407
0.139773	0.254519	0.351052	0.470666	0.558094	0.672025	0.762661	0.858343	0.983268	1.10137	1.25901	1.49156	1.81345	2.21934	2.86992	3.96814	5.64556	8.35882	14.2913	22.2189	34.8186	50.7399	97.8355
0.139889	0.254622	0.351232	0.471079	0.558185	0.673229	0.762942	0.858979	0.983485	1.10431	1.2592	1.49637	1.81474	2.2195	2.87426	3.96814	5.66092	8.36422	14.3298	22.2243	34.8749	50.8582	98.471
0.139896	0.254641	0.351248	0.471322	0.558823	0.673612	0.763251	0.859237	0.984375	1.10679	1.2605	1.49693	1.81675	2.22451	2.87722	3.96814	5.6655	8.3997	14.3496	22.3264	34.9718	50.942	103.643
0.139976	0.254815	0.351783	0.471388	0.558901	0.673778	0.76499	0.859423	0.984375	1.10754	1.26286	1.49693	1.8169	2.22682	2.88045	3.96814	5.68606	8.41739	14.3498	22.3587	34.9979	50.99	107.621
0.140031	0.254914	0.351839	0.471528	0.559167	0.674019	0.765328	0.86096	0.984375	1.1077	1.26412	1.49693	1.81808	2.22692	2.88045	3.97577	5.71553	8.42568	14.3654	22.3836	35.0284	51.0951	110.127
0.140134	0.25497	0.352573	0.472178	0.559203	0.674255	0.766298	0.861146	0.984809	1.10788	1.26432	1.49693	1.81848	2.22847	2.89296	3.97651	5.72958	8.44286	14.3898	22.3919	35.0994	51.1384	112.61
0.140202	0.255139	0.352689	0.472209	0.560177	0.674545	0.766445	0.861508	0.985352	1.10822	1.26638	1.49693	1.8204	2.22847	2.89771	3.9825	5.74185	8.44942	14.3911	22.4126	35.1485	51.2023	115.011
0.140215	0.25538	0.352703	0.472405	0.560345	0.674901	0.767461	0.862149	0.985465	1.10907	1.26668	1.49791	1.82455	2.22847	2.90178	3.999	5.74512	8.45075	14.3938	22.4796	35.5099	51.2549	118.169
0.140365	0.255403	0.352969	0.472622	0.560523	0.675456	0.767596	0.864584	0.986447	1.1093	1.26957	1.49817	1.83019	2.22852	2.90678	4.00732	5.7624	8.49188	14.4086	22.4809	35.6182	51.3031	141.507
0.140648	0.255508	0.353259	0.472937	0.560596	0.675461	0.76809	0.866497	0.986915	1.10972	1.26973	1.49824	1.83034	2.24192	2.90689	4.00749	5.76616	8.49296	14.4373	22.4942	35.7654	51.5943	142.519
0.140693	0.255552	0.353316	0.473131	0.560822	0.675725	0.768801	0.867036	0.988186	1.10987	1.27273	1.50019	1.83224	2.24656	2.91263	4.00934	5.76616	8.50004	14.4697	22.508	35.8462	51.6788
0.140755	0.255585	0.353428	0.473286	0.560895	0.675732	0.769147	0.867404	0.988345	1.11157	1.27409	1.50384	1.83533	2.24739	2.91649	4.03206	5.77377	8.52484	14.4721	22.5299	35.8726	51.8137
0.140801	0.255727	0.353878	0.473326	0.561149	0.676102	0.76915	0.868264	0.988969	1.11264	1.27554	1.5064	1.83988	2.24933	2.93263	4.03624	5.77422	8.52769	14.4945	22.6	35.9204	52.1637
0.141208	0.255783	0.353999	0.473639	0.563086	0.677013	0.771337	0.868764	0.99128	1.11286	1.27697	1.50657	1.84011	2.25341	2.93904	4.04805	5.7763	8.52918	14.5279	22.7256	36.0214	52.2334
0.141309	0.255845	0.354081	0.473702	0.563191	0.677558	0.773362	0.868954	0.991565	1.11305	1.27741	1.50873	1.84727	2.25953	2.94978	4.0568	5.79236	8.55582	14.5423	22.789	36.2168	52.4336
0.141315	0.256109	0.354362	0.474497	0.563595	0.678062	0.774045	0.870405	0.992368	1.11557	1.27964	1.50936	1.84742	2.25968	2.95781	4.07013	5.79334	8.56763	14.5858	22.8122	36.3066	52.6968
0.141462	0.256567	0.354713	0.474823	0.563727	0.679235	0.774746	0.870879	0.994042	1.11664	1.28118	1.51087	1.84807	2.26412	2.96336	4.09917	5.7961	8.59789	14.6113	22.8344	36.5855	52.9399
0.141848	0.256744	0.354946	0.475052	0.56419	0.680003	0.776135	0.873139	0.994101	1.11686	1.2816	1.51593	1.85048	2.26887	2.96336	4.10113	5.81004	8.65802	14.6394	22.9628	36.7378	52.9702
0.141848	0.256961	0.355024	0.475202	0.564198	0.680033	0.776344	0.873225	0.994775	1.11842	1.28331	1.52031	1.85169	2.26887	2.96336	4.10363	5.81818	8.7071	14.656	22.9704	36.7791	53.0113
0.141874	0.257088	0.35536	0.47529	0.564537	0.680672	0.776408	0.873482	0.994998	1.12138	1.28369	1.52324	1.8532	2.26887	2.96599	4.10591	5.83403	8.76315	14.7184	23.0601	37.0165	53.1061
0.14197	0.257199	0.355445	0.475571	0.565754	0.680976	0.7771	0.873772	0.995277	1.12154	1.28616	1.5242	1.85624	2.27532	2.97356	4.10591	5.84701	8.76368	14.743	23.1035	37.2391	53.1863
0.14206	0.257245	0.355905	0.475604	0.566316	0.68101	0.777168	0.874057	0.996371	1.12158	1.28645	1.52591	1.86008	2.28362	2.97356	4.11726	5.8709	8.77336	14.7551	23.1172	37.4273	53.2342
0.142065	0.257337	0.356094	0.47566	0.566378	0.681587	0.777183	0.874518	0.996503	1.1218	1.28677	1.52594	1.86275	2.28456	2.99087	4.12528	5.91612	8.79265	14.8168	23.1696	37.4429	53.3145
0.142168	0.257415	0.35628	0.476025	0.566824	0.683405	0.777365	0.875468	0.997172	1.12295	1.28689	1.52928	1.863	2.29346	2.99716	4.13439	5.92506	8.81139	14.8188	23.183	37.4559	53.3343
0.142245	0.257721	0.356524	0.476266	0.567225	0.684498	0.778217	0.875506	0.997572	1.12443	1.28749	1.52977	1.86307	2.29436	3.00221	4.13912	5.93765	8.81572	14.8305	23.1846	37.7001	53.7232
0.14235	0.257769	0.356989	0.477087	0.567492	0.68505	0.778217	0.876342	0.997582	1.12508	1.2879	1.53052	1.86455	2.29704	3.00917	4.14819	5.94712	8.81881	14.8312	23.233	37.7333	53.7871
0.142407	0.257885	0.357107	0.477178	0.567602	0.685206	0.778217	0.877032	0.999379	1.12541	1.28916	1.53188	1.86613	2.29721	3.01135	4.15162	5.96173	8.8404	14.8862	23.2347	37.7864	53.8158
0.142444	0.258094	0.357441	0.477721	0.568112	0.685412	0.778217	0.878383	0.999812	1.12571	1.2895	1.53188	1.86742	2.29765	3.03176	4.16179	5.98353	8.85155	14.8871	23.3205	37.8769	54.0955
0.14265	0.258122	0.358005	0.477763	0.568498	0.686481	0.778217	0.879719	1.00005	1.12658	1.28991	1.53433	1.86776	2.30105	3.03591	4.17068	5.99152	8.88452	14.9477	23.3343	37.8922	54.1496
0.142709	0.258251	0.358581	0.477867	0.568562	0.687363	0.778217	0.880716	1.00211	1.12752	1.29223	1.53495	1.8706	2.3031	3.04401	4.17418	5.99847	8.91123	14.9583	23.3996	38.0778	54.1848
0.142732	0.258494	0.358627	0.478607	0.568762	0.687396	0.778217	0.880753	1.00401	1.1296	1.29269	1.53884	1.87419	2.30523	3.04401	4.17425	6.00273	8.91729	14.9626	23.4255	38.1096	54.2956
0.142811	0.258562	0.358663	0.478845	0.570803	0.687425	0.778217	0.881973	1.00403	1.13055	1.29333	1.53921	1.87419	2.30795	3.04696	4.17814	6.00791	8.91729	15.0003	23.4332	38.1572	54.4374
0.142964	0.2587	0.360038	0.478943	0.572466	0.687531	0.778217	0.882582	1.00494	1.13171	1.29733	1.53922	1.87419	2.30807	3.05112	4.18359	6.00791	8.93846	15.0016	23.4371	38.5045	54.5212
0.143107	0.258885	0.36009	0.479303	0.572561	0.688085	0.778217	0.884174	1.00517	1.13241	1.29757	1.54088	1.87692	2.31525	3.06643	4.19468	6.00791	8.97925	15.0118	23.4506	38.5268	54.9703
0.143118	0.258893	0.360105	0.479779	0.572841	0.688462	0.778217	0.884605	1.00608	1.13255	1.29838	1.54122	1.87708	2.31638	3.06738	4.19931	6.01876	8.99373	15.0121	23.4513	38.6775	55.0348
0.143196	0.259038	0.360207	0.480121	0.572863	0.688478	0.778217	0.885489	1.00644	1.13344	1.30706	1.54205	1.8785	2.31719	3.06817	4.20051	6.02984	9.00472	15.0299	23.5089	38.8486	55.2206
0.143343	0.259076	0.360225	0.480415	0.574018	0.689005	0.778298	0.886218	1.00738	1.13347	1.30787	1.54274	1.8805	2.31725	3.06963	4.20457	6.05032	9.00487	15.0404	23.5157	39.0041	55.2353
0.143404	0.259243	0.360609	0.48069	0.5743	0.689125	0.778624	0.886821	1.00811	1.13434	1.31035	1.54369	1.8806	2.31932	3.07825	4.20525	6.05311	9.01809	15.0566	23.5318	39.2093	55.4061
0.143489	0.259447	0.360683	0.481137	0.575093	0.689348	0.778666	0.887304	1.0087	1.13532	1.31103	1.54437	1.88112	2.32012	3.08355	4.21245	6.08094	9.02786	15.0621	23.5649	39.2244	55.5337
0.143525	0.259564	0.36132	0.481796	0.575549	0.689618	0.779696	0.887304	1.0094	1.1355	1.31162	1.54438	1.88417	2.32016	3.0947	4.21245	6.09321	9.04876	15.1563	23.5656	39.5433	55.7157
0.143626	0.259661	0.361339	0.48184	0.575987	0.69028	0.780104	0.887304	1.01041	1.1355	1.31184	1.54586	1.88656	2.32164	3.09754	4.21354	6.11284	9.05102	15.1585	23.5736	39.8945	55.899
0.143737	0.259689	0.361595	0.481973	0.576287	0.690928	0.780792	0.887304	1.01046	1.13584	1.31429	1.54788	1.88674	2.32621	3.10097	4.22238	6.12265	9.0528	15.169	23.5936	40.0657	55.9273
0.144	0.259696	0.361663	0.482071	0.576855	0.691024	0.781458	0.887304	1.01106	1.13587	1.31599	1.54798	1.88698	2.32656	3.11274	4.22691	6.15234	9.10037	15.1942	23.6006	40.1085	56.0197
0.144013	0.259978	0.361722	0.482117	0.576862	0.691615	0.782152	0.887575	1.01109	1.13614	1.31622	1.54915	1.89456	2.33176	3.12701	4.23235	6.15234	9.1026	15.2201	23.6723	40.222	56.4864
0.144026	0.260034	0.362078	0.482156	0.57697	0.691972	0.78251	0.887858	1.01181	1.1363	1.31658	1.54967	1.89523	2.33313	3.13226	4.23396	6.15312	9.10547	15.2538	23.7088	40.4377	56.9109
0.144365	0.260614	0.362168	0.482673	0.577013	0.692567	0.782731	0.888179	1.01252	1.1371	1.31823	1.55016	1.89938	2.33338	3.13226	4.23503	6.15905	9.11436	15.294	23.7094	40.5283	57.0842
0.144394	0.260745	0.362576	0.483002	0.577921	0.692759	0.782898	0.888188	1.01271	1.13976	1.31932	1.5504	1.90041	2.33465	3.13757	4.24039	6.172	9.12067	15.3034	23.7557	40.5346	57.1468
0.144667	0.261213	0.3626	0.483138	0.578087	0.693014	0.782938	0.888795	1.01285	1.14012	1.32057	1.55058	1.90303	2.33465	3.15154	4.24093	6.17561	9.12442	15.3219	23.7637	40.5868	57.3087
0.144727	0.261619	0.362965	0.484262	0.578132	0.693274	0.783208	0.88996	1.01329	1.14028	1.32096	1.55064	1.9089	2.33819	3.15441	4.24277	6.18854	9.13382	15.328	23.8082	40.6695	57.3275
0.144778	0.261726	0.363018	0.484837	0.57815	0.693913	0.783516	0.890189	1.01383	1.14036	1.32126	1.55064	1.9095	2.33859	3.16436	4.24435	6.21113	9.15054	15.3602	23.866	40.6956	57.3502
0.144806	0.261772	0.363274	0.485703	0.578595	0.694433	0.783889	0.891064	1.01467	1.14141	1.32134	1.55264	1.91007	2.3402	3.19147	4.25618	6.22573	9.16611	15.3802	23.9247	40.7803	57.3525
0.145062	0.261963	0.363838	0.486211	0.578685	0.694494	0.784042	0.892077	1.01467	1.14282	1.32169	1.55462	1.9102	2.34691	3.19267	4.26517	6.22627	9.19851	15.3823	24.2374	40.9027	57.4795
0.145088	0.262046	0.364378	0.486735	0.579072	0.694704	0.784393	0.892284	1.01467	1.14307	1.32228	1.55558	1.9159	2.35327	3.19922	4.27322	6.22916	9.1994	15.3844	24.242	41.0045	57.6862
0.145102	0.262201	0.364389	0.486843	0.579099	0.694849	0.784736	0.892994	1.01467	1.1442	1.32268	1.55574	1.91653	2.35415	3.21305	4.27361	6.27418	9.19959	15.402	24.2685	41.0099	57.6862
0.145244	0.262206	0.364782	0.487	0.579434	0.69541	0.784843	0.893262	1.01467	1.14642	1.32439	1.55622	1.9183	2.35506	3.2166	4.27949	6.28204	9.24092	15.4069	24.2785	41.0534	57.6866
0.145331	0.262748	0.365233	0.487224	0.579628	0.69556	0.785222	0.894346	1.01467	1.14671	1.32526	1.55643	1.92055	2.35792	3.22828	4.29784	6.28213	9.25856	15.4115	24.3099	41.117	58.3138
0.145605	0.263035	0.365456	0.487472	0.57972	0.69577	0.786161	0.894346	1.01467	1.14733	1.32526	1.55643	1.92205	2.35891	3.2311	4.29784	6.28602	9.28658	15.4177	24.3275	41.2323	58.9794
0.145707	0.263078	0.366108	0.487617	0.580303	0.696058	0.786188	0.894346	1.01467	1.14977	1.32526	1.5571	1.92205	2.36678	3.23219	4.30358	6.28865	9.295	15.4262	24.3732	41.2418	59.6636
0.145757	0.263359	0.366271	0.487663	0.580337	0.696058	0.786285	0.895434	1.01467	1.15079	1.32526	1.5574	1.92205	2.36695	3.23414	4.30443	6.29942	9.31003	15.4433	24.4241	41.4023	59.78
0.145861	0.263604	0.366524	0.488604	0.580412	0.696058	0.786365	0.896679	1.01467	1.1508	1.33084	1.55815	1.92205	2.37067	3.23624	4.31643	6.30017	9.31588	15.4515	24.4623	41.7765	60.1194
0.146094	0.263692	0.36656	0.488882	0.580541	0.696058	0.786638	0.896841	1.01467	1.15092	1.33307	1.56062	1.92205	2.37264	3.23686	4.32166	6.30308	9.31588	15.4557	24.5011	41.8453	60.1366
0.146315	0.26418	0.367303	0.489131	0.580582	0.696058	0.787407	0.897133	1.01467	1.1516	1.33402	1.56171	1.92205	2.37437	3.23895	4.34149	6.3095	9.34244	15.4666	24.5169	41.8692	60.2919
0.146392	0.264222	0.367318	0.489612	0.581172	0.696058	0.787476	0.897287	1.01467	1.15346	1.33507	1.56692	1.9282	2.38123	3.24655	4.34241	6.32257	9.35502	15.5185	24.579	41.9538	60.5865
0.146454	0.264256	0.367448	0.489623	0.581484	0.696058	0.787715	0.897429	1.01467	1.15372	1.33577	1.56794	1.9326	2.38242	3.24975	4.34609	6.33119	9.37097	15.5195	24.6141	42.0849	60.7188
0.146564	0.26427	0.367874	0.490538	0.581579	0.696315	0.788547	0.897573	1.01515	1.15505	1.33577	1.56878	1.93387	2.38258	3.25113	4.34671	6.33923	9.37097	15.5361	24.6237	42.3754	61.0656
0.146572	0.264291	0.368007	0.490835	0.581888	0.696467	0.789564	0.898457	1.01522	1.15792	1.3361	1.57078	1.93466	2.38302	3.26802	4.35384	6.34422	9.38066	15.5371	24.7122	42.4781	61.171
0.14659	0.264296	0.368242	0.491202	0.582293	0.696985	0.790364	0.898611	1.01553	1.15897	1.3395	1.57457	1.93731	2.38314	3.26966	4.35384	6.36159	9.3941	15.5838	24.7488	42.5955	61.2793
0.146605	0.264462	0.368843	0.492188	0.582937	0.697079	0.791221	0.900053	1.01827	1.15906	1.34012	1.57478	1.94011	2.38321	3.27226	4.36011	6.37745	9.417	15.5873	24.7808	42.8231	61.3643
0.146851	0.264558	0.369103	0.492188	0.584126	0.697133	0.79151	0.901888	1.01877	1.15914	1.3413	1.57488	1.94024	2.38982	3.28324	4.37092	6.38897	9.43217	15.6154	24.8103	42.8969	61.4317
0.147037	0.264643	0.369458	0.492188	0.584172	0.697431	0.791852	0.902186	1.01917	1.15948	1.34538	1.57577	1.94126	2.39542	3.29791	4.37957	6.39361	9.47061	15.6768	24.8578	43.1715	62.4213
0.147131	0.264732	0.369568	0.492188	0.58421	0.697843	0.792067	0.902221	1.01943	1.16061	1.34678	1.57577	1.95128	2.39552	3.30169	4.38572	6.39844	9.4749	15.6768	24.8745	43.2696	62.5888
0.147185	0.264827	0.369797	0.492188	0.584265	0.698	0.792685	0.903265	1.0203	1.16079	1.34686	1.57577	1.95227	2.39707	3.30169	4.4015	6.40821	9.48954	15.6985	24.9187	43.3886	62.6693
0.147312	0.26494	0.369895	0.492188	0.584768	0.69837	0.792971	0.903266	1.02081	1.16245	1.34842	1.57577	1.953	2.3983	3.30231	4.41242	6.41734	9.49084	15.7109	24.942	43.4911	62.9928
0.147366	0.265204	0.370573	0.492188	0.585134	0.698384	0.793268	0.903812	1.02143	1.16618	1.35387	1.57671	1.95328	2.4057	3.3072	4.42102	6.43264	9.50254	15.718	25.0461	43.76	63.0404
0.14743	0.265283	0.370909	0.492188	0.587224	0.698459	0.793419	0.904002	1.02272	1.16637	1.35583	1.57761	1.95363	2.41046	3.30803	4.42356	6.43787	9.50875	15.7577	25.0712	43.7922	63.0548
0.147443	0.26548	0.371052	0.492188	0.587242	0.698466	0.793681	0.904062	1.02272	1.1673	1.35694	1.57819	1.95371	2.41146	3.30877	4.42488	6.44089	9.51413	15.7999	25.1064	43.8627	63.0964
0.147458	0.265528	0.37111	0.492188	0.587401	0.698801	0.793851	0.904405	1.02291	1.16822	1.35846	1.57829	1.95527	2.41628	3.31085	4.42969	6.44196	9.54287	15.8024	25.1128	43.879	63.2177
0.147502	0.265668	0.371173	0.492188	0.5875	0.69899	0.79456	0.906217	1.02428	1.16823	1.35853	1.5828	1.95662	2.41915	3.31394	4.43417	6.46011	9.56732	15.8133	25.1461	43.8992	63.3201
0.147942	0.265936	0.371188	0.492188	0.587688	0.698994	0.795988	0.906218	1.02459	1.16884	1.36153	1.58643	1.95694	2.42374	3.31903	4.43652	6.47554	9.59766	15.849	25.2854	44.2459	63.7535
0.147948	0.266065	0.371188	0.492188	0.587841	0.699336	0.79619	0.906292	1.02511	1.17292	1.36337	1.58827	1.95839	2.42823	3.33138	4.43652	6.48164	9.62142	15.8659	25.3174	44.2565	63.9347
0.147972	0.266423	0.371363	0.492188	0.587845	0.701481	0.796308	0.906395	1.02556	1.17297	1.3634	1.59073	1.96063	2.43144	3.3353	4.43652	6.48198	9.66437	15.8761	25.3369	44.4032	63.9882
0.147988	0.266474	0.371824	0.492188	0.588739	0.701486	0.796511	0.906413	1.02561	1.17465	1.36583	1.59363	1.96186	2.43213	3.33777	4.4371	6.49506	9.66995	15.9083	25.4218	44.4103	64.0416
0.148097	0.26653	0.371835	0.492188	0.588909	0.701583	0.796856	0.906926	1.02617	1.17552	1.36945	1.59378	1.96307	2.43475	3.34099	4.43766	6.49541	9.67348	15.9126	25.5019	44.4434	64.0437
0.148334	0.266688	0.37189	0.492188	0.589274	0.701583	0.796921	0.90774	1.0271	1.17581	1.371	1.59501	1.96504	2.4362	3.34724	4.46142	6.49706	9.68755	15.9143	25.5117	44.4559	64.0481
0.148359	0.266691	0.37225	0.492188	0.589351	0.701801	0.796978	0.908144	1.02738	1.17635	1.37279	1.60392	1.96508	2.4392	3.34724	4.46181	6.49706	9.72066	15.9204	25.5681	44.4742	64.5517
0.148376	0.266777	0.372428	0.492261	0.589529	0.702344	0.797826	0.908221	1.02831	1.17689	1.37348	1.60634	1.96671	2.44125	3.34724	4.46763	6.49706	9.74338	15.9249	25.5924	44.5491	64.5942
0.148469	0.267147	0.373829	0.492333	0.589753	0.702516	0.798215	0.908247	1.02971	1.17902	1.37378	1.60751	1.96846	2.44259	3.34724	4.47197	6.50047	9.78034	15.9249	25.7401	44.7146	64.644
0.148506	0.267607	0.37403	0.492833	0.589867	0.702692	0.799416	0.910875	1.03034	1.17957	1.37418	1.60764	1.96875	2.44486	3.34724	4.47992	6.50172	9.78384	15.928	25.792	44.7398	64.7143
0.148555	0.26785	0.374214	0.492874	0.590388	0.703271	0.800376	0.910881	1.0305	1.17964	1.37589	1.61075	1.96875	2.44838	3.34724	4.48304	6.52065	9.81961	15.9672	25.7981	44.7695	64.7368
0.148665	0.267975	0.374552	0.493092	0.590409	0.703406	0.800788	0.911803	1.03173	1.17966	1.37765	1.61151	1.97005	2.46094	3.34924	4.48331	6.53887	9.83299	15.9778	25.8862	44.8295	64.8898
0.148808	0.268203	0.375026	0.493151	0.59041	0.704637	0.801064	0.912261	1.03211	1.18062	1.3791	1.61581	1.97125	2.46094	3.35103	4.48374	6.54083	9.83452	16.0073	25.9589	44.9711	65.4715
0.148906	0.268487	0.375139	0.493796	0.590863	0.7049	0.801694	0.912558	1.03227	1.1844	1.38375	1.61618	1.97338	2.46094	3.35423	4.48614	6.55153	9.87171	16.0093	26.0049	45.1204	65.7866
0.149187	0.268558	0.375553	0.494292	0.592178	0.705244	0.80174	0.91302	1.03317	1.18556	1.38453	1.61923	1.97519	2.46094	3.35917	4.48781	6.55263	9.88366	16.0181	26.0251	45.1335	65.8984
0.149209	0.268605	0.375678	0.494348	0.592529	0.706397	0.801763	0.913665	1.03443	1.18614	1.38545	1.61988	1.97941	2.46471	3.36407	4.48817	6.554	9.8936	16.0186	26.0811	45.4864	65.9021
0.149358	0.268619	0.376031	0.494348	0.592587	0.706687	0.801872	0.913724	1.03456	1.18681	1.38567	1.62342	1.97944	2.47003	3.37092	4.49079	6.55893	9.89977	16.0325	26.0988	45.489	65.9562
0.149448	0.26895	0.37632	0.495001	0.593948	0.706733	0.802418	0.9141	1.03458	1.18702	1.38594	1.62803	1.98074	2.47321	3.37258	4.49079	6.56115	9.90814	16.1093	26.1671	45.6843	66.0054
0.149525	0.269138	0.376402	0.495284	0.594152	0.707978	0.80362	0.914764	1.0347	1.18778	1.38658	1.62836	1.98256	2.47321	3.37521	4.49079	6.56971	9.91392	16.1243	26.2204	45.7083	66.01
0.149559	0.269368	0.376537	0.495743	0.594442	0.708747	0.804096	0.91481	1.03486	1.1883	1.38683	1.62901	1.98341	2.47321	3.37739	4.49079	6.57767	9.94951	16.1618	26.3361	45.7988	66.0252
0.149587	0.269675	0.377104	0.495928	0.594985	0.708773	0.804175	0.914882	1.03514	1.18896	1.38987	1.62972	1.98407	2.48183	3.38614	4.49234	6.59813	9.99208	16.1806	26.4469	45.8066	66.0794
0.149627	0.269745	0.377104	0.496019	0.595108	0.708825	0.805063	0.915364	1.03577	1.19026	1.39046	1.6302	1.98407	2.48514	3.39284	4.49652	6.59876	9.99335	16.1872	26.4545	45.8072	67.005
0.14963	0.269832	0.377252	0.496094	0.596069	0.709389	0.806472	0.915411	1.03621	1.19053	1.39085	1.63813	1.98438	2.49044	3.39315	4.49665	6.62628	9.99335	16.2136	26.5077	45.8897	67.3277
0.14972	0.269917	0.377513	0.496094	0.596327	0.709923	0.806574	0.917247	1.03684	1.19082	1.39128	1.63886	1.98447	2.49055	3.39652	4.49684	6.62667	9.99599	16.2416	26.5895	45.9609	67.387
0.149778	0.270059	0.37826	0.496094	0.59634	0.7103	0.806604	0.917363	1.03722	1.19162	1.39212	1.64059	1.9868	2.49088	3.39878	4.51049	6.64909	10.01	16.2456	26.6373	45.9657	67.7205
0.149825	0.270289	0.378506	0.496094	0.596676	0.710394	0.807013	0.917547	1.03725	1.19203	1.39212	1.64507	1.99181	2.50272	3.41	4.51524	6.64909	10.0131	16.2774	26.6911	45.9716	67.8657
0.149853	0.270358	0.378646	0.496375	0.596743	0.710885	0.807818	0.91798	1.03829	1.19326	1.39212	1.64585	1.99572	2.50415	3.41192	4.51768	6.66197	10.0279	16.2912	26.6935	46.197	67.9194
0.149947	0.270374	0.378666	0.496949	0.59689	0.711254	0.808206	0.918427	1.03873	1.19333	1.39518	1.6471	1.99982	2.50709	3.41834	4.52177	6.66328	10.0417	16.2988	26.7735	46.2639	68.2319
0.149965	0.270567	0.37891	0.496975	0.597085	0.711476	0.809049	0.919365	1.03928	1.19439	1.39607	1.65085	1.99982	2.51505	3.42309	4.52438	6.67194	10.0995	16.4161	26.7916	46.3715	68.2767
0.15005	0.270641	0.379416	0.497669	0.597153	0.711599	0.809241	0.919426	1.03963	1.1948	1.39679	1.65085	1.99982	2.51722	3.42769	4.52699	6.68867	10.1467	16.4706	26.9654	46.3918	68.333
0.150161	0.270727	0.379627	0.497929	0.59724	0.711791	0.809282	0.920315	1.04091	1.19503	1.39942	1.65085	1.99982	2.51875	3.42769	4.5274	6.68906	10.1468	16.5048	27.0216	46.5117	68.4017
0.15017	0.27087	0.379705	0.498697	0.597855	0.711905	0.810406	0.922317	1.04093	1.19618	1.40028	1.65267	1.99982	2.51991	3.42787	4.53801	6.69146	10.159	16.5176	27.0626	46.8247	68.8118
0.150179	0.27121	0.380272	0.498959	0.598228	0.71219	0.810804	0.922571	1.04126	1.19621	1.40277	1.65538	1.99982	2.52648	3.42865	4.53844	6.69447	10.1735	16.5278	27.0703	46.9672	69.3705
0.150315	0.271299	0.380448	0.499363	0.598587	0.712902	0.810883	0.922617	1.0416	1.19676	1.40406	1.65966	2.00375	2.52787	3.42926	4.55533	6.7006	10.1855	16.5342	27.0812	46.9825	69.3773
0.150331	0.27143	0.381234	0.499983	0.598744	0.71319	0.812478	0.923025	1.0418	1.19737	1.40427	1.66085	2.00709	2.53088	3.4301	4.56029	6.70786	10.2066	16.5543	27.0928	46.9916	69.5719
0.150375	0.271468	0.38125	0.500087	0.599188	0.713459	0.814775	0.923245	1.04211	1.1988	1.40693	1.66395	2.00713	2.53369	3.44066	4.56369	6.71147	10.2092	16.5575	27.0938	47.0734	70.4499
0.150387	0.271778	0.381786	0.500496	0.599521	0.714203	0.81544	0.923623	1.04234	1.19983	1.40769	1.66395	2.00791	2.54103	3.44116	4.57123	6.72087	10.2212	16.573	27.1946	47.1119	70.6705
0.150412	0.271793	0.381878	0.500624	0.599573	0.714388	0.815549	0.923917	1.04344	1.20021	1.40949	1.66467	2.00861	2.54528	3.44531	4.57157	6.72156	10.2418	16.663	27.2917	47.232	71.8314
0.150525	0.272526	0.382287	0.500787	0.600255	0.715462	0.815758	0.923984	1.04385	1.20043	1.41047	1.66734	2.00929	2.54698	3.44531	4.57314	6.72783	10.2611	16.6787	27.3023	47.282	72.1999
0.150567	0.272815	0.382611	0.501141	0.600304	0.716112	0.816397	0.924084	1.04391	1.20085	1.4141	1.66764	2.00986	2.5489	3.45409	4.57398	6.73823	10.2675	16.7001	27.3339	47.3398	72.2045
0.150579	0.272854	0.382709	0.501149	0.600441	0.716379	0.816446	0.924086	1.04402	1.20145	1.41573	1.6721	2.01151	2.55024	3.45409	4.57439	6.74149	10.2772	16.7235	27.3895	47.3728	72.5993
0.150686	0.273067	0.383031	0.501275	0.600472	0.71643	0.817125	0.925286	1.04409	1.20182	1.41682	1.67224	2.01221	2.55083	3.45612	4.57761	6.77576	10.3203	16.7367	27.393	47.4867	73.6492
0.150771	0.273246	0.383541	0.501586	0.600509	0.716445	0.817685	0.925403	1.04409	1.20222	1.41878	1.67292	2.01474	2.55806	3.45616	4.57837	6.7888	10.3713	16.7507	27.5725	47.6057	73.712
0.15083	0.273287	0.383923	0.50187	0.600868	0.716873	0.818589	0.926648	1.0447	1.20607	1.42026	1.67409	2.01565	2.56144	3.46338	4.58364	6.80639	10.3897	16.7633	27.5793	47.7192	74.4432
0.150925	0.27335	0.383966	0.502198	0.602328	0.716951	0.818921	0.926822	1.0449	1.20612	1.42097	1.67521	2.01673	2.56296	3.46586	4.59959	6.80662	10.399	16.7841	27.6261	47.7859	74.646
0.150983	0.273445	0.383968	0.502285	0.603558	0.717102	0.818973	0.927569	1.04623	1.20741	1.42127	1.67648	2.01819	2.56929	3.4726	4.59998	6.80662	10.4293	16.8233	27.7237	47.8113	75.1795
0.151049	0.27349	0.384521	0.502468	0.603867	0.717434	0.819302	0.929236	1.04634	1.20855	1.42181	1.67724	2.01973	2.58804	3.47294	4.60476	6.81569	10.4397	16.8433	27.7261	48.0041	75.6889
0.151119	0.273617	0.384617	0.502667	0.604088	0.717561	0.819307	0.929881	1.04645	1.20855	1.4232	1.67802	2.02126	2.58969	3.48029	4.60883	6.83262	10.4467	16.9047	27.7606	48.1697	76.3561
0.151125	0.273992	0.384704	0.502725	0.604118	0.717603	0.819391	0.9305	1.04768	1.20879	1.42388	1.68643	2.02248	2.58969	3.48029	4.62457	6.83769	10.4467	16.9085	27.7791	48.1973	76.7812
0.151447	0.274121	0.385162	0.503967	0.60453	0.718114	0.819444	0.930641	1.04773	1.20935	1.42481	1.68821	2.02465	2.59649	3.48029	4.62636	6.83769	10.5085	16.949	27.8014	48.4426	77.3737
0.151549	0.27421	0.385377	0.504212	0.604557	0.719583	0.819506	0.930684	1.04791	1.20954	1.42638	1.68821	2.02485	2.60098	3.48447	4.63608	6.85743	10.5214	16.971	27.826	48.481	77.4805
0.151597	0.274221	0.38565	0.50446	0.605043	0.720266	0.819619	0.93088	1.04997	1.21347	1.42659	1.68826	2.02716	2.60627	3.48691	4.64255	6.87117	10.5282	16.9876	27.838	48.729	79.0359
0.151612	0.274382	0.385741	0.504526	0.605419	0.720515	0.819941	0.931037	1.05016	1.21399	1.42674	1.69333	2.02756	2.61601	3.50038	4.64712	6.88902	10.5333	16.9882	27.8929	48.7638	79.2028
0.151672	0.27473	0.385777	0.504561	0.605486	0.720723	0.819942	0.933442	1.05035	1.21441	1.42682	1.6941	2.02934	2.61601	3.50784	4.64854	6.89547	10.5463	16.9896	27.9816	48.9575	79.3338
0.151688	0.274826	0.385813	0.504653	0.605818	0.720789	0.820261	0.93359	1.05038	1.21492	1.42825	1.699	2.03104	2.61626	3.51032	4.65951	6.92769	10.547	16.9982	28.0244	48.9881	79.4624
0.15186	0.274947	0.385844	0.50467	0.606556	0.722036	0.820872	0.934024	1.05084	1.2166	1.42949	1.69904	2.03698	2.61854	3.51538	4.67239	6.93443	10.569	17.0445	28.4076	49.082	81.8945
0.151919	0.275	0.386203	0.505114	0.60687	0.722121	0.820901	0.934341	1.05192	1.21703	1.42992	1.69905	2.04005	2.62794	3.52353	4.67578	6.95056	10.5849	17.0634	28.4621	49.0907	81.9625
0.152019	0.275383	0.386397	0.505578	0.607046	0.722492	0.820914	0.93442	1.05254	1.21754	1.43045	1.70083	2.04189	2.62866	3.52388	4.67616	6.95093	10.5849	17.0741	28.4907	49.1116	82.1102
0.152031	0.276087	0.386451	0.505949	0.607358	0.722822	0.821413	0.934479	1.05391	1.21774	1.43045	1.70294	2.04199	2.63222	3.52403	4.68225	6.95155	10.5984	17.0853	28.5265	49.2666	82.5486
0.152111	0.276672	0.386541	0.506611	0.607869	0.723425	0.821468	0.935406	1.05546	1.2181	1.43095	1.7038	2.04204	2.63275	3.52776	4.69448	6.95299	10.6065	17.0888	28.5684	49.2678	82.689
0.152227	0.27674	0.386711	0.506786	0.608129	0.723639	0.822151	0.936704	1.05575	1.22141	1.43496	1.70704	2.0459	2.63382	3.53225	4.69847	6.96493	10.6249	17.1145	28.7227	49.2987	82.8309
0.152303	0.27683	0.38696	0.507592	0.608162	0.723795	0.822174	0.937207	1.05591	1.22221	1.43496	1.71208	2.0471	2.63774	3.53322	4.69937	6.96807	10.6249	17.1293	28.7467	49.4262	83.0398
0.152348	0.276863	0.387006	0.508073	0.608282	0.72499	0.823982	0.937974	1.05633	1.22305	1.43496	1.71967	2.05167	2.64364	3.53376	4.71584	6.96928	10.7298	17.142	28.8098	49.548	83.3662
0.152425	0.276941	0.387193	0.508404	0.608292	0.725478	0.824061	0.939273	1.0592	1.22325	1.43496	1.72113	2.05184	2.65051	3.54346	4.71931	6.97287	10.8218	17.1579	28.8192	49.5633	83.5027
0.152686	0.277055	0.387264	0.508813	0.609276	0.725846	0.824106	0.939463	1.06057	1.22386	1.43725	1.72134	2.05964	2.65355	3.54693	4.72693	6.97342	10.822	17.1861	28.8977	49.7708	86.0994
0.152688	0.277603	0.387268	0.509404	0.609471	0.725852	0.824262	0.941129	1.06215	1.2242	1.43789	1.72266	2.06341	2.65824	3.55392	4.72859	6.98588	10.8362	17.2006	28.967	49.7884	86.1827
0.152762	0.27778	0.387705	0.509835	0.609714	0.725896	0.824386	0.941299	1.06282	1.22532	1.44026	1.72266	2.0653	2.66191	3.56246	4.73371	7.02081	10.8393	17.213	29.4321	49.8065	87.5682
0.152819	0.277795	0.387928	0.510282	0.609719	0.727123	0.82477	0.941583	1.06564	1.22548	1.44082	1.72266	2.07071	2.66191	3.56449	4.73371	7.02174	10.8485	17.2191	29.4852	49.8568	90.6698
0.15288	0.277808	0.388043	0.510686	0.609768	0.727652	0.82548	0.94226	1.06646	1.2266	1.44356	1.72266	2.07569	2.67883	3.56666	4.75079	7.03596	10.9169	17.2817	29.518	49.8648	91.6266
0.15295	0.27785	0.38809	0.511603	0.610055	0.727912	0.825956	0.942868	1.06864	1.22815	1.44452	1.72633	2.07583	2.68731	3.56746	4.75131	7.04445	10.9218	17.2857	29.7197	49.9637	92.0233
0.153012	0.277867	0.388211	0.512217	0.610167	0.728181	0.82644	0.942995	1.0692	1.22941	1.44466	1.72759	2.08185	2.69031	3.57689	4.75348	7.0503	10.9753	17.2908	29.7203	49.9788	93.1838
0.153183	0.277924	0.388492	0.512221	0.613018	0.728339	0.826764	0.943639	1.06971	1.22984	1.44538	1.72896	2.08334	2.69388	3.57761	4.76829	7.05509	10.9753	17.3023	29.818	50.3507	95.3743
0.153271	0.278197	0.388499	0.512268	0.613033	0.72885	0.82746	0.943667	1.07021	1.23047	1.44555	1.73002	2.08817	2.69767	3.58604	4.77692	7.07429	10.9974	17.3138	29.8737	50.4348	95.5161
0.153307	0.27839	0.388774	0.512467	0.613563	0.729268	0.827941	0.943987	1.07024	1.23047	1.44599	1.7305	2.08817	2.71457	3.599	4.77828	7.07556	11.0581	17.3593	29.8839	50.4491	96.9722
0.153487	0.27916	0.388829	0.512574	0.613697	0.729707	0.828599	0.944203	1.07089	1.23047	1.4483	1.73059	2.08817	2.71819	3.60925	4.77828	7.08562	11.0836	17.3753	29.9447	50.4986	97.6778
0.153586	0.279232	0.388969	0.513121	0.613881	0.729983	0.828622	0.94474	1.0713	1.23047	1.44906	1.73095	2.08887	2.71819	3.61211	4.79561	7.08612	11.1191	17.3837	29.9662	50.6164	101.659
0.153608	0.279423	0.388985	0.51318	0.613906	0.730816	0.8297	0.944789	1.07193	1.23047	1.45041	1.73261	2.08901	2.72523	3.61264	4.80616	7.08676	11.1377	17.4241	30.029	50.8593	104.423
0.153656	0.279584	0.389061	0.513885	0.614276	0.731399	0.830182	0.946792	1.07226	1.23047	1.45412	1.73466	2.09047	2.72825	3.61678	4.81246	7.08788	11.1539	17.4241	30.2922	50.8694	107.019
0.153672	0.279779	0.39024	0.514191	0.614353	0.731695	0.831492	0.947446	1.07438	1.23047	1.45927	1.73518	2.09188	2.73163	3.62048	4.83498	7.09803	11.2236	17.4628	30.3014	50.8992	109.606
0.153724	0.27979	0.391043	0.514457	0.614371	0.734096	0.83232	0.947627	1.07591	1.23047	1.46109	1.73544	2.09476	2.73977	3.62275	4.84008	7.10269	11.2377	17.4744	30.3119	51.1362	111.896
0.15387	0.279878	0.391197	0.514848	0.614578	0.73478	0.832627	0.947994	1.07804	1.23047	1.46122	1.73623	2.09523	2.74108	3.63072	4.84536	7.10851	11.2377	17.4822	30.4615	51.2874	114.844
0.153878	0.279898	0.39176	0.514997	0.614682	0.735298	0.832971	0.948001	1.07829	1.23047	1.46266	1.7396	2.09548	2.75141	3.63353	4.85347	7.11239	11.2614	17.4947	30.5977	51.3918	134.121
0.15404	0.280288	0.3919	0.515243	0.615234	0.735394	0.83328	0.948502	1.07841	1.23047	1.46385	1.74015	2.09605	2.75141	3.63679	4.8657	7.11371	11.2738	17.5118	30.6955	51.4373	135.114
0.154161	0.280367	0.392302	0.515281	0.615431	0.735454	0.834587	0.950203	1.0785	1.23047	1.46546	1.74015	2.09615	2.75663	3.64043	4.88217	7.13294	11.323	17.5176	30.7688	51.4636	135.887
0.154218	0.280531	0.39236	0.515321	0.615624	0.735729	0.834733	0.950747	1.07861	1.23047	1.46568	1.74015	2.10263	2.76351	3.65042	4.88482	7.13672	11.3303	17.5224	30.86	51.7947
0.154317	0.280708	0.392904	0.515591	0.617235	0.736332	0.835161	0.950929	1.07903	1.23047	1.46809	1.74015	2.10263	2.77325	3.6521	4.88596	7.14821	11.3374	17.5384	30.8668	51.8114
0.154325	0.280743	0.392953	0.515655	0.617252	0.737104	0.835404	0.951119	1.07906	1.23047	1.46879	1.74015	2.10263	2.77672	3.6531	4.90338	7.14908	11.3857	17.5405	30.9547	52.0309
0.15434	0.280773	0.394185	0.515722	0.617882	0.737155	0.835482	0.951441	1.07933	1.23047	1.46913	1.74015	2.10713	2.78423	3.65436	4.90338	7.15367	11.3916	17.5485	31.0815	52.2108
0.154353	0.280839	0.394407	0.51646	0.618082	0.738281	0.835548	0.951977	1.08105	1.23075	1.46914	1.74015	2.10984	2.78858	3.65602	4.90359	7.15367	11.4306	17.5574	31.1306	52.4705
0.154381	0.281149	0.394532	0.517074	0.618562	0.738281	0.837578	0.952577	1.08282	1.23185	1.46968	1.74015	2.11166	2.79346	3.65707	4.92188	7.15367	11.4954	17.5593	31.1593	52.4877
0.15463	0.281409	0.394706	0.517484	0.619212	0.738281	0.837611	0.953177	1.08308	1.23266	1.47031	1.74083	2.11453	2.79452	3.65845	4.93053	7.15367	11.5091	17.6003	31.1617	52.5241
0.15467	0.281566	0.395044	0.517526	0.619225	0.738281	0.837723	0.953657	1.08358	1.23338	1.47068	1.74086	2.11698	2.7955	3.65845	4.93122	7.16515	11.5205	17.612	31.1841	52.5834
0.15477	0.28158	0.395562	0.517645	0.619587	0.738281	0.837857	0.95412	1.08523	1.23376	1.47077	1.74112	2.12062	2.79703	3.65845	4.93721	7.1893	11.5283	17.6176	31.1931	52.7287
0.154934	0.281619	0.395843	0.517948	0.619832	0.738281	0.839998	0.955133	1.08546	1.23451	1.47145	1.74151	2.13075	2.79883	3.66097	4.94277	7.19095	11.5408	17.6547	31.2306	52.9755
0.15501	0.281635	0.396266	0.517962	0.619938	0.738661	0.840229	0.955512	1.08606	1.23466	1.47176	1.74216	2.13378	2.79974	3.66237	4.95809	7.20217	11.5577	17.6801	31.2568	53.0102
0.155042	0.281916	0.396533	0.51816	0.620184	0.739058	0.840241	0.955877	1.09126	1.23467	1.472	1.74618	2.13471	2.80211	3.66553	4.96364	7.21809	11.5621	17.6866	31.2584	53.0641
0.155219	0.282037	0.396958	0.51854	0.620285	0.739957	0.842253	0.955887	1.0915	1.23534	1.47302	1.7518	2.13509	2.80244	3.66702	4.98302	7.22066	11.569	17.7372	31.2888	53.1619
0.155277	0.28218	0.39732	0.518996	0.620586	0.740272	0.842406	0.955956	1.09245	1.23642	1.47325	1.75285	2.13687	2.8059	3.67088	4.98363	7.26075	11.6079	17.7822	31.2888	53.1863
0.155407	0.282393	0.397398	0.519284	0.62116	0.741508	0.842716	0.956145	1.09271	1.23723	1.47585	1.75359	2.14446	2.8059	3.67993	4.9878	7.26444	11.6105	17.7873	31.3598	53.222
0.155495	0.283038	0.397631	0.519553	0.621171	0.742094	0.842778	0.956186	1.09334	1.23753	1.47656	1.75436	2.14783	2.80616	3.68182	4.98818	7.26799	11.6571	17.8719	31.6215	53.3906
0.155499	0.283093	0.397848	0.51998	0.621174	0.74221	0.843665	0.957413	1.09559	1.23768	1.47675	1.75716	2.14988	2.80826	3.68599	4.99758	7.26913	11.6603	17.8735	31.6392	53.5948
0.155659	0.283337	0.398062	0.520177	0.621336	0.742261	0.845919	0.957933	1.09604	1.24029	1.47681	1.75826	2.15073	2.8099	3.68761	4.998	7.27001	11.6887	17.8864	31.6581	53.8158
0.155674	0.28341	0.398291	0.520408	0.621409	0.742361	0.847184	0.958805	1.09643	1.24237	1.47681	1.76039	2.15198	2.81095	3.69141	5.00133	7.28451	11.6936	17.9095	31.6713	53.9116
0.155796	0.283443	0.398674	0.520607	0.622008	0.742606	0.847993	0.96012	1.09911	1.24337	1.47683	1.76299	2.15397	2.81339	3.69141	5.01034	7.28653	11.7012	17.9143	31.7652	54.137
0.15585	0.283473	0.399007	0.520641	0.622202	0.743152	0.849176	0.960955	1.10029	1.24339	1.47862	1.7633	2.15591	2.81641	3.69706	5.02248	7.30561	11.8117	17.933	31.9664	54.1546
0.155868	0.283502	0.399255	0.520667	0.622586	0.743203	0.849903	0.960967	1.10056	1.24746	1.47926	1.76568	2.15611	2.82803	3.69793	5.05199	7.30676	11.8862	17.9561	32.0738	54.1807
0.155886	0.283571	0.399307	0.52156	0.622866	0.743946	0.850036	0.961367	1.10056	1.24846	1.47952	1.76633	2.15944	2.82817	3.6996	5.06352	7.30808	11.8866	17.9665	32.1362	54.367
0.156091	0.283631	0.399466	0.521572	0.622904	0.744094	0.851483	0.961671	1.10056	1.24873	1.48088	1.76786	2.16455	2.83686	3.6996	5.06676	7.30861	11.893	17.9769	32.1745	54.6295
0.156096	0.283637	0.399809	0.521598	0.623303	0.744957	0.851768	0.962306	1.10056	1.25036	1.48482	1.76821	2.16902	2.83831	3.6996	5.06738	7.31689	11.9149	17.9918	32.3583	54.6749
0.156346	0.283755	0.400359	0.521659	0.623392	0.747181	0.852342	0.962568	1.10056	1.25036	1.48567	1.76839	2.17287	2.8394	3.7061	5.07335	7.3715	11.9473	17.9939	32.4577	54.9215
0.156388	0.28408	0.400427	0.52193	0.623811	0.7473	0.852718	0.963097	1.10142	1.25075	1.48883	1.77003	2.17927	2.84435	3.70907	5.08961	7.3746	11.9694	18.0216	32.5784	55.2129
0.156405	0.284087	0.401406	0.522096	0.623855	0.74796	0.852794	0.963426	1.10248	1.25177	1.48883	1.77078	2.18264	2.86992	3.71528	5.11021	7.38037	11.9838	18.0686	32.6815	55.4677
0.156563	0.284139	0.401513	0.522112	0.624114	0.748027	0.853024	0.963813	1.10259	1.25215	1.48906	1.7714	2.18325	2.86992	3.71914	5.11362	7.38281	11.996	18.0859	32.6897	55.5763
0.156784	0.284227	0.401837	0.522507	0.624343	0.749047	0.853104	0.964969	1.10316	1.25336	1.49223	1.77326	2.18334	2.86992	3.72071	5.11625	7.38691	12.0226	18.0933	32.7221	56.001
0.156977	0.284327	0.402149	0.522525	0.624606	0.750369	0.853175	0.967288	1.10424	1.25458	1.49517	1.77461	2.18404	2.86992	3.72798	5.12543	7.38946	12.0624	18.1442	32.777	56.0127
0.157022	0.284567	0.402382	0.523083	0.6248	0.750432	0.853386	0.967518	1.10551	1.25476	1.49616	1.77606	2.18541	2.87213	3.73582	5.13859	7.40329	12.0631	18.151	32.8428	56.385
0.15713	0.284887	0.402598	0.524155	0.625903	0.752199	0.854183	0.967807	1.10583	1.25484	1.49693	1.77864	2.18667	2.87393	3.74628	5.15046	7.41512	12.0987	18.1786	32.8551	56.4671
0.157356	0.285274	0.402786	0.524327	0.626002	0.752394	0.85516	0.968059	1.10653	1.25484	1.49693	1.78242	2.19677	2.87651	3.74839	5.15625	7.42346	12.0991	18.1929	32.9068	56.5082
0.15746	0.285883	0.402966	0.524342	0.626426	0.752418	0.855335	0.968124	1.10686	1.25646	1.49885	1.7871	2.19783	2.88045	3.7561	5.16285	7.44532	12.1177	18.2387	32.9905	56.6593
0.157476	0.286399	0.403281	0.524521	0.627193	0.75246	0.855634	0.968256	1.10687	1.25648	1.49988	1.78782	2.20113	2.88045	3.76127	5.17382	7.45005	12.1191	18.2576	33.0235	56.7382
0.157501	0.286591	0.40354	0.525299	0.6282	0.752504	0.856273	0.968784	1.10733	1.25661	1.50296	1.78869	2.20113	2.88201	3.76142	5.19135	7.45121	12.1256	18.2775	33.1566	56.7914
0.157608	0.286726	0.403637	0.52605	0.628432	0.753503	0.857199	0.969393	1.10776	1.25755	1.5042	1.78869	2.20113	2.88948	3.76804	5.1944	7.4622	12.1412	18.3104	33.2271	57.0481
0.157714	0.286808	0.403917	0.52635	0.628474	0.753568	0.857396	0.969429	1.10807	1.2578	1.50493	1.78869	2.20296	2.89361	3.7753	5.1992	7.48465	12.2183	18.3315	33.2396	57.468
0.157859	0.286813	0.404091	0.526709	0.628849	0.754437	0.857669	0.969592	1.1093	1.25923	1.5066	1.78869	2.20384	2.89531	3.78286	5.21463	7.48465	12.2353	18.3385	33.3172	57.5065
0.157954	0.286961	0.404228	0.526788	0.629505	0.754643	0.858195	0.969929	1.1093	1.25955	1.50773	1.78896	2.21304	2.91655	3.78875	5.23006	7.49934	12.2856	18.4334	33.373	57.7041
0.157986	0.286985	0.40431	0.526838	0.629922	0.755355	0.858621	0.970079	1.11064	1.26169	1.51115	1.79004	2.21484	2.91745	3.79219	5.23202	7.50891	12.3121	18.4455	33.4914	58.3206
0.157998	0.28727	0.404494	0.527166	0.630471	0.755555	0.858711	0.970112	1.11132	1.26171	1.51117	1.79159	2.21484	2.92053	3.79494	5.24359	7.51292	12.3501	18.4635	33.642	58.3403
0.158082	0.287693	0.404707	0.527309	0.632022	0.756935	0.859291	0.970783	1.11134	1.26246	1.51138	1.79159	2.21484	2.93102	3.80349	5.25197	7.5491	12.3842	18.466	33.7606	58.5227
0.158221	0.288402	0.40472	0.527761	0.632077	0.757169	0.85974	0.97153	1.1114	1.26291	1.51252	1.79159	2.21484	2.93387	3.81391	5.25283	7.58736	12.412	18.483	33.9247	58.553
0.158401	0.288417	0.404915	0.527894	0.632109	0.757486	0.861001	0.971911	1.11247	1.26331	1.5128	1.79194	2.21515	2.9349	3.81687	5.2597	7.58793	12.4149	18.5153	33.9359	58.5756
0.158445	0.288852	0.404944	0.528076	0.632827	0.758229	0.861893	0.972228	1.11261	1.26342	1.51439	1.79224	2.2156	2.94099	3.82554	5.26088	7.59598	12.4208	18.5233	33.9379	58.9111
0.158604	0.288939	0.405144	0.528197	0.634369	0.758441	0.862043	0.972662	1.11396	1.26397	1.51593	1.7924	2.21621	2.94204	3.82598	5.28386	7.59709	12.4442	18.5463	33.9752	58.965
0.158919	0.288964	0.405303	0.528526	0.635337	0.758464	0.862261	0.972903	1.11494	1.26561	1.51643	1.79414	2.21624	2.94296	3.82714	5.28388	7.60107	12.4501	18.5583	33.9969	59.0432
0.159002	0.289004	0.405325	0.528619	0.635845	0.759182	0.862413	0.973322	1.11511	1.26634	1.51652	1.79464	2.2214	2.9443	3.82832	5.29055	7.60622	12.4808	18.5632	34.1983	59.0616
0.159192	0.289013	0.405376	0.528641	0.636377	0.760807	0.862546	0.973762	1.11605	1.26801	1.51737	1.79507	2.2257	2.95104	3.82832	5.33242	7.61914	12.4919	18.5788	34.2606	59.0774
0.159268	0.289055	0.405841	0.529032	0.637017	0.76148	0.862852	0.974618	1.11623	1.26961	1.51822	1.79574	2.22586	2.95312	3.84411	5.33546	7.63552	12.5024	18.6318	34.3041	59.8052
0.159307	0.289186	0.406177	0.529094	0.637592	0.76153	0.863941	0.9748	1.11753	1.26972	1.51909	1.79607	2.22847	2.95493	3.84411	5.35604	7.64477	12.5045	18.6627	34.306	59.9151
0.159527	0.28925	0.406441	0.52913	0.638261	0.762484	0.865056	0.975	1.11774	1.2713	1.51961	1.79756	2.22884	2.95883	3.85198	5.36091	7.65105	12.5339	18.6681	34.3088	60.2286
0.159744	0.289709	0.406663	0.529133	0.638681	0.762838	0.865413	0.975905	1.11896	1.27257	1.52016	1.79772	2.22952	2.96334	3.85276	5.3683	7.66455	12.5484	18.7074	34.4657	60.4289
0.159763	0.289893	0.406922	0.529209	0.638799	0.7629	0.865492	0.97596	1.11937	1.27585	1.5206	1.79809	2.23018	2.96336	3.85756	5.37477	7.68123	12.5492	18.7419	34.4778	60.5611
0.160097	0.289929	0.407427	0.530033	0.638949	0.76334	0.865842	0.976501	1.11954	1.28188	1.52084	1.79905	2.23345	2.96336	3.85781	5.39726	7.68376	12.6062	18.747	34.5067	60.7573
0.160193	0.290105	0.407486	0.530048	0.639736	0.763536	0.866077	0.976936	1.1196	1.2841	1.52246	1.7994	2.23434	2.96336	3.86102	5.39726	7.69629	12.6062	18.7489	34.8073	61.0536
0.160246	0.290453	0.408125	0.530059	0.639784	0.763857	0.866371	0.978245	1.12115	1.28418	1.52564	1.80229	2.23898	2.9669	3.86312	5.39726	7.69905	12.6103	18.7537	34.8207	61.0615
0.16027	0.290705	0.408138	0.530093	0.640804	0.764216	0.866678	0.978366	1.1213	1.28545	1.52842	1.80311	2.24137	2.96755	3.86479	5.41965	7.71895	12.6565	18.7865	35.0284	61.6566
0.160354	0.290729	0.408278	0.530604	0.640889	0.76464	0.867072	0.978495	1.12162	1.28587	1.53175	1.80453	2.24229	2.97356	3.8648	5.41965	7.72647	12.6583	18.8059	35.1509	61.9144
0.160451	0.290797	0.408474	0.531168	0.641486	0.764724	0.869898	0.978889	1.12186	1.2874	1.53506	1.80461	2.24347	2.97436	3.87601	5.42535	7.76576	12.6599	18.8192	35.2567	61.9496
0.160455	0.291095	0.408523	0.531495	0.641727	0.76512	0.869917	0.979095	1.12214	1.28837	1.53548	1.80798	2.24829	2.97599	3.87687	5.42868	7.7685	12.6685	18.8248	35.3988	61.9519
0.160562	0.291144	0.408536	0.532043	0.641776	0.76631	0.871252	0.979234	1.12312	1.28933	1.54077	1.80838	2.25494	2.98021	3.89155	5.46417	7.80162	12.7043	18.827	35.4025	62.0415
0.160757	0.291213	0.409641	0.532519	0.642253	0.766411	0.871445	0.979705	1.12336	1.28974	1.54523	1.80971	2.25678	2.98612	3.89503	5.46417	7.80609	12.7613	18.8752	35.6692	62.0429
0.16103	0.291427	0.41089	0.532706	0.642996	0.76714	0.87164	0.979763	1.12652	1.28983	1.54599	1.80999	2.25875	2.99234	3.89725	5.4651	7.83444	12.7615	18.8894	35.8393	62.0586
0.161038	0.291784	0.410962	0.533092	0.644881	0.76769	0.871975	0.9798	1.12676	1.29053	1.548	1.81303	2.26026	2.99386	3.89992	5.49174	7.83705	12.7708	18.9215	35.8487	62.0682
0.16117	0.291821	0.411158	0.533592	0.645159	0.768296	0.872336	0.98129	1.12695	1.29064	1.54802	1.8149	2.26066	2.99962	3.9064	5.4943	7.86399	12.7992	18.929	36.1762	62.0747
0.161259	0.291823	0.411564	0.534214	0.645552	0.768351	0.872396	0.982454	1.12747	1.29173	1.54847	1.82241	2.26087	3.00178	3.90697	5.49986	7.87077	12.8027	18.9424	36.3569	62.1265
0.161263	0.291987	0.412141	0.534371	0.645665	0.768606	0.872563	0.983154	1.1279	1.29195	1.55368	1.82692	2.26411	3.00396	3.91492	5.50282	7.87705	12.8312	18.9508	36.3695	62.3885
0.161332	0.292028	0.41216	0.535012	0.645779	0.768894	0.872786	0.984375	1.12803	1.29236	1.55643	1.82694	2.26606	3.00904	3.9375	5.50282	7.91747	12.8332	19.0362	36.475	62.4249
0.161416	0.292116	0.412239	0.536395	0.645842	0.769435	0.873136	0.984375	1.1284	1.29484	1.55643	1.82821	2.26628	3.01024	3.94487	5.52606	7.9423	12.8352	19.0975	36.6779	62.4715
0.161441	0.292236	0.412256	0.536471	0.646651	0.769585	0.87345	0.984375	1.12883	1.29511	1.55643	1.82854	2.26887	3.01337	3.94518	5.52659	7.95763	12.8756	19.098	36.7761	62.4745
0.161539	0.292644	0.412659	0.536516	0.646937	0.769951	0.874588	0.984375	1.12888	1.29569	1.55643	1.83162	2.26887	3.01899	3.95825	5.53027	7.9629	12.9369	19.1588	36.9714	62.686
0.161633	0.292814	0.413794	0.536658	0.647307	0.770248	0.874914	0.984375	1.13034	1.29735	1.55643	1.83449	2.26887	3.04401	3.96174	5.53027	7.97335	12.9408	19.1764	37.0596	62.8094
0.161705	0.293077	0.413872	0.536754	0.647518	0.770509	0.875044	0.984375	1.13055	1.29758	1.55757	1.83647	2.26887	3.04401	3.96192	5.55213	7.9859	12.9607	19.1927	37.0753	62.8706
0.161744	0.293158	0.413982	0.53694	0.648728	0.770671	0.876089	0.986128	1.13068	1.2985	1.55835	1.83956	2.26887	3.05758	3.96266	5.55213	7.99336	12.9685	19.1955	37.2123	62.9947
0.162258	0.293224	0.414371	0.536971	0.649004	0.771011	0.876306	0.98614	1.13101	1.29885	1.56451	1.84049	2.26887	3.06249	3.96275	5.55846	7.99707	12.9933	19.1969	37.435	63.1483
0.162267	0.293335	0.414477	0.537204	0.649162	0.771147	0.878093	0.986716	1.13107	1.30235	1.56594	1.84099	2.27043	3.06447	3.96482	5.5647	8.02698	12.9941	19.2069	37.5307	63.2748
0.16236	0.293595	0.415162	0.537423	0.649539	0.771213	0.878146	0.98678	1.13184	1.30653	1.56685	1.84575	2.27576	3.06606	3.96814	5.56724	8.03488	13.0143	19.2272	37.5324	63.3308
0.162366	0.293756	0.415202	0.537692	0.650322	0.771218	0.878461	0.988106	1.1326	1.30677	1.56737	1.84722	2.28418	3.06801	3.96814	5.58142	8.03505	13.0152	19.2294	37.6652	63.4976
0.162421	0.294016	0.415368	0.538125	0.650562	0.772211	0.879415	0.989372	1.13289	1.30955	1.56784	1.84783	2.28879	3.06966	3.96814	5.58453	8.04213	13.0158	19.2552	37.7696	63.6855
0.162583	0.294233	0.415449	0.538256	0.65117	0.772277	0.880139	0.989551	1.13309	1.31004	1.56825	1.84952	2.29277	3.0766	3.97198	5.58485	8.04617	13.043	19.2589	37.7962	63.7189
0.162622	0.294307	0.415838	0.538427	0.651471	0.772456	0.880753	0.992085	1.13353	1.31136	1.56834	1.85005	2.29318	3.07724	3.97487	5.58616	8.05228	13.0762	19.2913	38.1644	63.8508
0.162721	0.294346	0.415845	0.538652	0.651836	0.772525	0.880879	0.992578	1.13397	1.31231	1.56872	1.85153	2.29719	3.08474	3.97501	5.59619	8.087	13.119	19.3226	38.1763	63.8917
0.162927	0.2944	0.415961	0.538983	0.652309	0.772833	0.881684	0.992866	1.13548	1.31576	1.57507	1.85265	2.29924	3.09144	3.98791	5.62258	8.09599	13.1646	19.3254	38.2116	63.9238
0.162962	0.294515	0.416083	0.539306	0.65248	0.772842	0.882338	0.994289	1.13724	1.31762	1.57529	1.85319	2.30427	3.09389	3.99306	5.62258	8.10174	13.1737	19.3344	38.4891	63.9702
0.163053	0.294541	0.416199	0.539309	0.652728	0.772891	0.882368	0.994393	1.13807	1.3179	1.57577	1.85442	2.30571	3.09548	4.00564	5.64409	8.10292	13.1746	19.379	38.5296	64.4845
0.163423	0.294588	0.416565	0.539976	0.653371	0.774014	0.882611	0.996249	1.13917	1.32213	1.57577	1.85733	2.31188	3.09891	4.00612	5.6446	8.1074	13.1907	19.3987	38.6438	64.5001
0.163478	0.294639	0.416629	0.541651	0.655017	0.774112	0.883104	0.997172	1.13953	1.32289	1.57577	1.85781	2.3119	3.10166	4.00744	5.6655	8.12482	13.2172	19.4531	38.6574	64.6717
0.163478	0.294831	0.416783	0.542105	0.655623	0.775402	0.883302	0.997921	1.14062	1.32308	1.57577	1.85887	2.31213	3.10411	4.00874	5.6655	8.12962	13.2506	19.4976	38.6868	64.8956
0.163551	0.294919	0.416839	0.542919	0.657666	0.775575	0.883525	0.998857	1.14074	1.3247	1.57577	1.86007	2.31218	3.10598	4.0162	5.66674	8.18054	13.2747	19.5524	38.6904	65.3596
0.163552	0.294967	0.41686	0.543026	0.657841	0.775845	0.883672	0.998985	1.14111	1.32526	1.57577	1.86358	2.31793	3.11632	4.01726	5.67029	8.18054	13.2988	19.5596	38.8805	65.553
0.163601	0.295339	0.417555	0.5434	0.65799	0.7759	0.883917	0.999126	1.14247	1.32526	1.57577	1.86598	2.31812	3.11742	4.01955	5.67586	8.19533	13.338	19.5672	38.8898	65.6951
0.163678	0.295394	0.417644	0.543415	0.658157	0.77691	0.8841	0.999546	1.14465	1.32526	1.57577	1.86851	2.33172	3.11948	4.03624	5.68057	8.20222	13.3613	19.5873	38.9108	65.9085
0.1638	0.295838	0.418436	0.543626	0.658391	0.777267	0.884726	1.00047	1.14553	1.32526	1.57577	1.86919	2.33465	3.12136	4.03773	5.68121	8.22255	13.4065	19.6364	38.9186	66.0087
0.163842	0.295923	0.418629	0.544	0.658615	0.777421	0.886231	1.00067	1.14556	1.32526	1.57577	1.8715	2.33465	3.12314	4.04452	5.68152	8.22483	13.4093	19.6477	38.9824	66.2216
0.163929	0.295953	0.418806	0.54497	0.659083	0.778217	0.887304	1.00156	1.14687	1.32526	1.5778	1.87288	2.3373	3.1232	4.04981	5.68709	8.24318	13.4242	19.7041	38.9844	66.8075
0.164034	0.296316	0.41921	0.54586	0.659538	0.778217	0.887304	1.00308	1.14868	1.32678	1.57951	1.87419	2.33871	3.12785	4.05832	5.69071	8.28917	13.4544	19.7505	39.168	67.4068
0.16406	0.296505	0.419334	0.54631	0.659824	0.778217	0.887304	1.00468	1.14882	1.32846	1.58117	1.87419	2.34007	3.13226	4.05868	5.70011	8.31311	13.529	19.758	39.3566	68.3516
0.164114	0.296532	0.420002	0.54681	0.660093	0.778217	0.887304	1.00513	1.14958	1.32957	1.58117	1.87419	2.34089	3.1386	4.06124	5.70526	8.33575	13.5352	19.7802	39.3911	68.4194
0.164159	0.29685	0.420654	0.54681	0.661166	0.778217	0.887304	1.00768	1.14976	1.33112	1.58154	1.87419	2.34233	3.14753	4.07252	5.70817	8.37359	13.544	19.7805	39.4153	69.1891
0.164399	0.297008	0.420839	0.546901	0.661894	0.778217	0.887304	1.00865	1.14992	1.33399	1.58296	1.87579	2.3463	3.14997	4.07446	5.71593	8.37966	13.5441	19.8018	39.5201	69.2381
0.164441	0.297244	0.42085	0.547076	0.662282	0.778217	0.887304	1.00879	1.15312	1.33577	1.58568	1.87821	2.34749	3.15154	4.08925	5.73509	8.38708	13.5887	19.8063	39.5201	69.7727
0.164521	0.297277	0.420981	0.547205	0.662784	0.778217	0.887304	1.00989	1.15373	1.33577	1.58767	1.87836	2.349	3.15154	4.09089	5.73984	8.38954	13.591	19.8436	39.6215	70.1246
0.164999	0.297353	0.421122	0.547427	0.663961	0.778217	0.887304	1.00993	1.15378	1.33577	1.58778	1.88079	2.35203	3.15446	4.096	5.74176	8.39055	13.6244	19.8497	39.7069	70.5573
0.165015	0.297472	0.42117	0.547887	0.664753	0.778217	0.887304	1.01157	1.1539	1.33595	1.58827	1.88091	2.35406	3.16334	4.11253	5.74338	8.3997	13.6424	19.8616	39.7363	71.1033
0.165107	0.297485	0.421194	0.54813	0.664773	0.778217	0.887304	1.01193	1.15391	1.33743	1.58827	1.88207	2.35675	3.1677	4.11262	5.7489	8.4574	13.6679	19.8788	39.7401	71.3994
0.165421	0.29755	0.421236	0.548401	0.66513	0.778217	0.887304	1.01252	1.15506	1.33786	1.5885	1.88281	2.3577	3.16906	4.1189	5.76563	8.46511	13.6976	19.9718	39.8155	71.4626
0.165723	0.29818	0.421665	0.549202	0.665137	0.778217	0.887304	1.01314	1.15549	1.33829	1.589	1.88469	2.35815	3.17282	4.12192	5.76999	8.46612	13.7053	19.9862	39.8646	72.0408
0.165724	0.298263	0.421824	0.550282	0.665312	0.778217	0.887598	1.01327	1.15578	1.33886	1.58931	1.88476	2.36266	3.17537	4.12528	5.77226	8.48577	13.732	20.0487	39.9074	72.6914
0.165781	0.298785	0.421937	0.550282	0.665612	0.778217	0.888078	1.01434	1.15707	1.34359	1.59031	1.88548	2.36288	3.17951	4.12619	5.78822	8.49312	13.7457	20.0622	40.1857	72.7044
0.165868	0.298947	0.422092	0.550282	0.666133	0.779593	0.888079	1.01437	1.15765	1.34369	1.59089	1.88581	2.36294	3.18392	4.12737	5.78869	8.50153	13.7645	20.0733	40.1958	72.7527
0.165956	0.299193	0.423096	0.550282	0.666437	0.779735	0.888617	1.01467	1.15765	1.34385	1.59234	1.88586	2.36403	3.19328	4.14262	5.80113	8.51703	13.7697	20.0827	40.5346	73.0206
0.166145	0.299386	0.423145	0.550282	0.666887	0.779815	0.88882	1.01467	1.15771	1.34466	1.59352	1.88592	2.36497	3.1951	4.15253	5.80463	8.51711	13.7754	20.1317	40.5525	73.3558
0.166228	0.29945	0.423154	0.550282	0.667646	0.779942	0.889143	1.01467	1.1585	1.34553	1.59486	1.88866	2.36528	3.1959	4.15724	5.81371	8.52138	13.801	20.1453	40.626	73.7994
0.166232	0.299543	0.423296	0.550282	0.667796	0.78025	0.890705	1.01467	1.1597	1.34565	1.5961	1.8887	2.36897	3.1969	4.15727	5.83636	8.52359	13.8042	20.1918	40.8582	75.1558
0.166702	0.299843	0.423431	0.550282	0.668386	0.780355	0.890847	1.01467	1.15972	1.35049	1.59961	1.88907	2.37215	3.19922	4.16811	5.84452	8.53713	13.821	20.2004	40.9698	75.3212
0.16683	0.299867	0.423586	0.550282	0.669223	0.781334	0.890973	1.01467	1.16056	1.35099	1.60064	1.88907	2.37543	3.19922	4.17099	5.84862	8.54368	13.8224	20.2024	41.1328	76.1325
0.166898	0.299948	0.423943	0.550282	0.669228	0.781421	0.892436	1.01467	1.16126	1.35161	1.60094	1.89779	2.38282	3.20867	4.18012	5.84958	8.55502	13.834	20.2704	41.1871	76.5367
0.167001	0.300027	0.423956	0.550282	0.670446	0.7818	0.893152	1.01467	1.16418	1.35489	1.60285	1.8989	2.39109	3.20867	4.19083	5.84958	8.57099	13.8346	20.2725	41.222	77.541
0.16706	0.300052	0.4243	0.550282	0.671368	0.782448	0.8941	1.01492	1.16506	1.35561	1.60292	1.8993	2.39402	3.20867	4.19083	5.8624	8.57099	13.8659	20.2934	41.2712	77.6897
0.167214	0.300088	0.424817	0.550282	0.671492	0.782722	0.894346	1.01527	1.16654	1.35709	1.60355	1.90194	2.40031	3.22501	4.19431	5.8788	8.57493	13.8733	20.3021	41.2727	78.0905
0.167237	0.300157	0.426078	0.550282	0.671657	0.782765	0.894346	1.01559	1.16678	1.3582	1.60568	1.9054	2.4039	3.22758	4.19682	5.88705	8.59266	13.8982	20.3108	41.6073	78.4591
0.167518	0.300219	0.426184	0.550282	0.671857	0.783052	0.895069	1.01576	1.16811	1.36006	1.60629	1.90557	2.40786	3.23319	4.19766	5.88754	8.59418	13.932	20.3332	41.6946	78.7723
0.167713	0.300369	0.426435	0.550282	0.672316	0.784057	0.896635	1.0163	1.16861	1.36033	1.60729	1.91093	2.40889	3.23329	4.19771	5.90312	8.59569	13.9676	20.3459	41.6997	79.23
0.167715	0.300937	0.426443	0.550282	0.672466	0.784393	0.898409	1.01663	1.17017	1.36351	1.60784	1.91441	2.41166	3.23395	4.20145	5.90367	8.59744	13.9894	20.3789	41.7218	79.718
0.167716	0.301244	0.426538	0.550282	0.673296	0.784574	0.898523	1.01748	1.17031	1.36677	1.60839	1.91459	2.41869	3.23405	4.20525	5.90625	8.59823	13.9928	20.3827	42.0555	79.7682
0.167722	0.301527	0.4273	0.550282	0.673412	0.785723	0.898578	1.01863	1.17042	1.36999	1.60988	1.91678	2.42374	3.23686	4.20604	5.95221	8.60026	14.0183	20.3867	42.077	79.7769
0.167809	0.301992	0.427335	0.550282	0.673529	0.785799	0.898998	1.01919	1.17151	1.37217	1.60989	1.91742	2.42762	3.23686	4.21245	5.9573	8.63123	14.0387	20.4156	42.2023	79.9365
0.168054	0.302038	0.427375	0.550282	0.673532	0.786275	0.899647	1.01989	1.17159	1.37246	1.61012	1.91755	2.4341	3.23828	4.21342	5.9573	8.64136	14.0729	20.4317	42.331	79.9805
0.16808	0.302066	0.42759	0.550282	0.673777	0.78652	0.901013	1.02091	1.17169	1.37571	1.6105	1.9188	2.4362	3.24714	4.21725	5.96328	8.65537	14.0765	20.4684	42.3847	80.0104
0.168406	0.302395	0.428184	0.550282	0.673794	0.786553	0.901482	1.02109	1.17186	1.37572	1.61211	1.92085	2.43993	3.25192	4.22162	5.96711	8.68373	14.0812	20.4758	42.4001	80.4621
0.168539	0.302423	0.428278	0.550282	0.674318	0.786932	0.902032	1.02325	1.17407	1.37836	1.61781	1.92205	2.44407	3.25397	4.23863	5.98463	8.6903	14.0812	20.5063	42.5153	85.4778
0.168655	0.302563	0.428355	0.550282	0.675287	0.787037	0.902681	1.0233	1.17411	1.37993	1.61816	1.92205	2.449	3.2557	4.23863	5.99932	8.71226	14.0824	20.5076	42.5465	85.6526
0.168672	0.302576	0.428577	0.550282	0.675938	0.787095	0.902688	1.02412	1.17551	1.38073	1.61865	1.92205	2.45282	3.26016	4.24581	6.00164	8.72817	14.0877	20.519	42.6123	86.0093
0.168714	0.302701	0.428875	0.550282	0.676207	0.78711	0.9028	1.02414	1.17551	1.38136	1.61904	1.92205	2.45429	3.26053	4.24941	6.00565	8.74375	14.0884	20.5455	42.6732	87.8789
0.168715	0.302994	0.429194	0.550282	0.676409	0.787118	0.902971	1.02428	1.17649	1.38143	1.6216	1.92205	2.45615	3.26715	4.25236	6.00947	8.75187	14.0891	20.5732	42.7249	90.9602
0.16878	0.303056	0.429196	0.550282	0.677093	0.787413	0.9036	1.02453	1.17835	1.38336	1.62277	1.92205	2.45932	3.26827	4.25455	6.02815	8.75461	14.1107	20.6259	42.7769	91.2397
0.168786	0.303145	0.429441	0.550282	0.677764	0.787636	0.904357	1.02476	1.1834	1.38348	1.62344	1.92205	2.46094	3.27367	4.2629	6.06978	8.75636	14.1189	20.6673	42.7991	91.492
0.168991	0.303402	0.429652	0.550282	0.678167	0.787712	0.904806	1.02635	1.18381	1.38352	1.62387	1.92327	2.46094	3.27821	4.2646	6.07807	8.76041	14.1448	20.6919	42.84	93.3263
0.169089	0.304002	0.429913	0.550457	0.678971	0.787861	0.90491	1.02668	1.1846	1.38389	1.62477	1.93135	2.46094	3.27991	4.26836	6.07807	8.76315	14.145	20.7188	42.8483	94.7061
0.169174	0.304338	0.430134	0.551382	0.679098	0.788503	0.905408	1.02716	1.18494	1.38583	1.62573	1.93498	2.46479	3.28102	4.27039	6.08885	8.77444	14.1477	20.7223	42.8963	95.2011
0.169183	0.304415	0.430364	0.551663	0.67933	0.788543	0.905735	1.02825	1.1852	1.38873	1.62617	1.93731	2.46819	3.2833	4.27766	6.10753	8.78317	14.1515	20.7724	43.028	95.6938
0.169205	0.304571	0.43077	0.552238	0.680232	0.78867	0.906533	1.02891	1.18691	1.38961	1.62628	1.93731	2.46828	3.28361	4.28025	6.11284	8.78591	14.1603	20.8164	43.0638	98.4575
0.169325	0.304726	0.430941	0.552414	0.68032	0.789327	0.906957	1.02894	1.18749	1.39024	1.62779	1.93809	2.47321	3.28938	4.28329	6.1188	8.79419	14.1766	20.8359	43.0671	101.306
0.16951	0.304798	0.43154	0.55247	0.680732	0.790027	0.907229	1.0318	1.18778	1.39164	1.62802	1.93937	2.48525	3.29898	4.28965	6.14291	8.81473	14.1819	20.8402	43.1382	104.009
0.169631	0.304818	0.431649	0.552522	0.680948	0.790639	0.90871	1.03217	1.18806	1.39195	1.63094	1.94533	2.48897	3.30151	4.29145	6.14417	8.82455	14.2089	20.857	43.1426	106.479
0.169976	0.30491	0.431747	0.552557	0.680977	0.790869	0.909595	1.03262	1.18809	1.39212	1.63339	1.94576	2.49474	3.30169	4.29674	6.15088	8.82816	14.2596	20.8846	43.1675	108.574
0.170092	0.304976	0.432046	0.552596	0.681138	0.790968	0.909997	1.03264	1.18972	1.39212	1.63407	1.94641	2.50068	3.30473	4.29784	6.15979	8.84134	14.2913	20.9111	43.1907	111.08
0.170474	0.305141	0.432088	0.552779	0.68135	0.791352	0.911665	1.03597	1.19011	1.39212	1.63438	1.94954	2.50296	3.31085	4.29881	6.17107	8.86279	14.2958	20.9194	43.2258	126.492
0.17065	0.305846	0.432163	0.552878	0.681912	0.791568	0.913119	1.0363	1.19117	1.39272	1.63447	1.95103	2.50967	3.31085	4.30411	6.172	8.87304	14.3073	20.9594	43.377	127.724
0.170677	0.30588	0.432476	0.552886	0.68224	0.791798	0.915465	1.03693	1.19187	1.39479	1.63828	1.95329	2.50967	3.31085	4.30488	6.172	8.87304	14.3073	20.9849	43.461	128.476
0.170678	0.306434	0.432966	0.553933	0.682438	0.792391	0.91639	1.03749	1.19283	1.39583	1.63967	1.95389	2.50967	3.31085	4.31023	6.19359	8.88025	14.3104	21.01	43.5642	130.482
0.170744	0.306583	0.433017	0.554418	0.682444	0.79269	0.916625	1.04061	1.19295	1.39973	1.6399	1.95802	2.51228	3.31106	4.31715	6.20804	8.89516	14.3299	21.025	43.5674
0.170748	0.30725	0.43317	0.554618	0.6835	0.792724	0.917708	1.04123	1.19296	1.40424	1.64261	1.95852	2.51289	3.3127	4.32277	6.21113	8.91729	14.3369	21.1004	43.88
0.170853	0.307294	0.433242	0.55465	0.683755	0.793075	0.917892	1.04137	1.19303	1.40427	1.64585	1.96148	2.51447	3.31756	4.33195	6.22246	8.93117	14.3786	21.1412	43.8843
0.170977	0.307346	0.433809	0.55465	0.683869	0.793308	0.918033	1.04193	1.19396	1.40467	1.64674	1.96242	2.5145	3.32778	4.34275	6.22439	8.94607	14.4023	21.1452	43.9193
0.171017	0.307347	0.433863	0.55465	0.684519	0.794056	0.91855	1.04204	1.19483	1.40744	1.64763	1.96479	2.51729	3.3279	4.34861	6.22473	9.02866	14.4144	21.1453	43.9296
0.171088	0.307462	0.434239	0.55465	0.685004	0.795097	0.919252	1.04254	1.19577	1.40763	1.64777	1.9682	2.51921	3.33499	4.34936	6.22853	9.06489	14.4433	21.1698	44.1865
0.171098	0.307478	0.434471	0.555096	0.685057	0.795531	0.919352	1.0432	1.19618	1.40806	1.64911	1.96867	2.52049	3.33674	4.35251	6.22861	9.07549	14.4678	21.2524	44.2153
0.171115	0.307618	0.434519	0.555504	0.685081	0.795643	0.920009	1.04328	1.19723	1.4086	1.64948	1.96938	2.5309	3.33828	4.35384	6.23415	9.07549	14.4726	21.2723	44.3687
0.171174	0.308267	0.434589	0.555905	0.685461	0.796098	0.920429	1.04399	1.19793	1.40861	1.64971	1.97031	2.53369	3.3386	4.35786	6.23697	9.08112	14.4757	21.2924	44.4475
0.17127	0.308626	0.434744	0.555934	0.685484	0.796229	0.921178	1.04409	1.1987	1.41219	1.65008	1.97213	2.53369	3.34229	4.36851	6.23929	9.10547	14.5	21.3134	44.4736
0.171441	0.308809	0.435141	0.556115	0.68565	0.796561	0.92151	1.04409	1.20001	1.41396	1.65085	1.97425	2.53369	3.3436	4.38037	6.24016	9.14022	14.5179	21.3256	44.5522
0.171482	0.308962	0.435184	0.556199	0.685792	0.79687	0.921964	1.0463	1.20189	1.41426	1.65085	1.97706	2.53457	3.34724	4.38607	6.24285	9.19058	14.5302	21.479	44.558
0.171583	0.309004	0.435938	0.556235	0.685895	0.797255	0.92204	1.04658	1.20499	1.41486	1.65085	1.9773	2.53513	3.34724	4.39275	6.24542	9.194	14.5556	21.5818	44.5802
0.171599	0.30923	0.436096	0.556318	0.686391	0.797704	0.922138	1.04712	1.2056	1.41646	1.65085	1.97822	2.53851	3.34724	4.39606	6.25006	9.20433	14.5596	21.6006	44.739
0.171724	0.30937	0.436112	0.556456	0.686467	0.798103	0.922746	1.04715	1.20595	1.42077	1.65215	1.97856	2.54036	3.34724	4.39753	6.26504	9.22299	14.5624	21.6435	44.9982
0.171905	0.309563	0.436157	0.557258	0.687258	0.798257	0.923315	1.04753	1.20649	1.4213	1.65274	1.98063	2.54493	3.35115	4.40055	6.27349	9.22441	14.5778	21.6618	44.9998
0.172101	0.310233	0.436686	0.558337	0.688011	0.798336	0.923792	1.04796	1.20668	1.42143	1.6529	1.98303	2.545	3.35572	4.41005	6.27418	9.23191	14.5891	21.6976	45.1154
0.172259	0.310348	0.437322	0.559854	0.688123	0.798763	0.924389	1.04814	1.20708	1.4226	1.65293	1.98407	2.54632	3.35717	4.41089	6.27418	9.23789	14.6078	21.7037	45.1232
0.172261	0.3106	0.437422	0.560883	0.688248	0.799148	0.926251	1.04856	1.20763	1.42261	1.65614	1.98407	2.5564	3.36311	4.41618	6.27418	9.25064	14.6363	21.7424	45.1594
0.172276	0.310624	0.437431	0.560947	0.688378	0.799704	0.926265	1.04858	1.20931	1.42416	1.65708	1.98407	2.56158	3.36589	4.42266	6.27418	9.26372	14.6875	21.8193	45.2837
0.172379	0.310935	0.437488	0.56134	0.688689	0.800607	0.926724	1.04865	1.21449	1.42468	1.65752	1.98407	2.56293	3.37838	4.42474	6.28865	9.26869	14.703	21.9245	45.2922
0.172428	0.311278	0.437955	0.56184	0.688869	0.801329	0.928046	1.04893	1.21471	1.42484	1.6586	1.98407	2.56929	3.37942	4.42969	6.29729	9.28152	14.7184	21.9388	45.3014
0.172449	0.31152	0.437975	0.56204	0.688899	0.801445	0.928377	1.04935	1.21503	1.42774	1.65968	1.98407	2.56929	3.3807	4.42969	6.31451	9.28187	14.7335	21.9727	45.4095
0.172471	0.311599	0.438021	0.56227	0.689959	0.801763	0.929183	1.05037	1.21546	1.42821	1.66009	1.98407	2.56929	3.38506	4.43652	6.32302	9.28561	14.7513	22.0134	45.5993
0.172502	0.312015	0.438117	0.562365	0.689995	0.801948	0.92946	1.05043	1.21613	1.42893	1.66026	1.98407	2.56929	3.38623	4.45378	6.3351	9.30465	14.7575	22.0402	45.6177
0.172528	0.312924	0.438495	0.562513	0.690048	0.802836	0.929908	1.05194	1.21669	1.43069	1.66271	1.98713	2.58555	3.38883	4.46233	6.36894	9.31588	14.7835	22.061	45.6973
0.172588	0.313177	0.438737	0.562883	0.690855	0.802935	0.929967	1.05205	1.21685	1.43207	1.66395	1.99301	2.58803	3.39571	4.47288	6.37875	9.3185	14.7841	22.0964	45.7372
0.172761	0.313381	0.438931	0.563652	0.69089	0.803361	0.930127	1.05211	1.218	1.43368	1.66395	1.99677	2.59354	3.39986	4.48651	6.40194	9.33144	14.7923	22.1039	45.7544
0.172936	0.313435	0.439298	0.564528	0.691464	0.803629	0.930211	1.05237	1.21964	1.43496	1.66395	1.99693	2.59632	3.3999	4.48779	6.40964	9.33691	14.8004	22.1079	45.8327
0.172987	0.313478	0.439439	0.564564	0.691637	0.803726	0.930258	1.05237	1.21978	1.43496	1.66432	1.99726	2.60247	3.40442	4.49896	6.41734	9.33985	14.8739	22.1347	45.9054
0.173031	0.313709	0.439584	0.56457	0.691744	0.804895	0.930346	1.05286	1.21999	1.43496	1.66656	1.99737	2.60844	3.41073	4.50226	6.42627	9.3453	14.8739	22.2559	46.0037
0.173127	0.314092	0.439676	0.56497	0.692042	0.805228	0.930666	1.05472	1.22	1.43496	1.66683	1.99982	2.61601	3.41285	4.50236	6.4308	9.3629	14.9002	22.2646	46.0478
0.173189	0.314245	0.440435	0.565295	0.692262	0.805726	0.931122	1.05476	1.22092	1.43496	1.66903	1.99982	2.61601	3.41781	4.51768	6.43417	9.37477	14.9148	22.2859	46.1142
0.173223	0.31472	0.440484	0.565694	0.693085	0.806374	0.931274	1.05923	1.22172	1.43496	1.66917	1.99982	2.61601	3.41884	4.52239	6.44089	9.39132	14.9179	22.3642	46.1221
0.173251	0.314887	0.44072	0.566656	0.69316	0.807081	0.931453	1.05925	1.22245	1.43609	1.67037	1.99982	2.61792	3.42434	4.52539	6.44122	9.40037	14.9279	22.3895	46.2663
0.173474	0.315089	0.441216	0.566798	0.69341	0.807132	0.932365	1.05926	1.22306	1.43658	1.6714	2.00347	2.61903	3.42769	4.53771	6.4922	9.41136	14.9485	22.3945	46.3892
0.173529	0.315148	0.441368	0.566885	0.693767	0.807177	0.932941	1.05949	1.22403	1.43728	1.67144	2.00357	2.62599	3.42769	4.53774	6.49706	9.41178	14.9696	22.5983	46.4974
0.173732	0.315467	0.441446	0.566904	0.694653	0.807411	0.932959	1.05987	1.22661	1.43754	1.6722	2.00458	2.62712	3.42769	4.53774	6.50048	9.41817	14.9702	22.6352	46.5401
0.173774	0.315498	0.442322	0.567277	0.694796	0.808125	0.933161	1.06026	1.22938	1.43922	1.67377	2.00517	2.62923	3.43006	4.55735	6.50743	9.42328	15.0089	22.6357	46.7238
0.173774	0.315623	0.442392	0.5679	0.694995	0.808262	0.933842	1.06118	1.2294	1.43988	1.67483	2.00955	2.63566	3.43123	4.55873	6.51832	9.43893	15.0359	22.6665	46.8047
0.173817	0.315846	0.442571	0.568288	0.695116	0.808591	0.934608	1.06265	1.23047	1.44283	1.67517	2.00957	2.64188	3.43499	4.56061	6.52918	9.44032	15.044	22.7866	46.8904
0.173824	0.316107	0.442803	0.56849	0.695243	0.808603	0.934609	1.06331	1.23047	1.44432	1.67774	2.01221	2.64232	3.44264	4.57761	6.53894	9.44824	15.0782	22.7877	46.9944
0.174015	0.31614	0.442824	0.568678	0.695371	0.808664	0.934744	1.06352	1.23047	1.44635	1.67837	2.01329	2.64621	3.44295	4.58653	6.54061	9.45017	15.0901	22.798	47.0063
0.17412	0.316518	0.443907	0.56884	0.695883	0.808957	0.935406	1.06498	1.23047	1.44776	1.68198	2.01705	2.6465	3.44531	4.58969	6.54382	9.46742	15.1082	22.8217	47.0065
0.174198	0.316788	0.443919	0.569317	0.695982	0.809436	0.936264	1.06582	1.23047	1.44952	1.68302	2.01784	2.64913	3.44531	4.5965	6.54405	9.46793	15.1358	22.8801	47.0111
0.174309	0.316967	0.443925	0.569473	0.696058	0.809497	0.936793	1.06617	1.23047	1.45207	1.68327	2.01894	2.65051	3.45093	4.60083	6.57847	9.46802	15.1378	22.892	47.02
0.174312	0.317055	0.44394	0.569705	0.696058	0.810162	0.937253	1.06641	1.23047	1.45754	1.68663	2.02399	2.65051	3.45286	4.62245	6.58411	9.47947	15.1831	22.9272	47.2763
0.174366	0.317331	0.443941	0.570418	0.696058	0.810314	0.937535	1.06646	1.23047	1.45823	1.69148	2.0256	2.65287	3.45389	4.63811	6.58806	9.49082	15.1866	22.9937	47.4702
0.174436	0.317346	0.443948	0.57055	0.696058	0.810531	0.937601	1.06729	1.23047	1.46138	1.6918	2.02755	2.65658	3.45409	4.64236	6.6055	9.49098	15.2314	22.9976	47.4855
0.174462	0.317353	0.4441	0.570574	0.696058	0.811636	0.937704	1.06805	1.23047	1.46155	1.69188	2.02934	2.66191	3.45409	4.64329	6.60766	9.50295	15.25	23.0056	47.5063
0.174472	0.317432	0.444278	0.570655	0.696058	0.811819	0.937983	1.06865	1.23047	1.46214	1.69345	2.02934	2.66191	3.45409	4.64533	6.61412	9.52082	15.2895	23.015	47.527
0.17456	0.317435	0.444413	0.570684	0.696058	0.814655	0.938045	1.07042	1.23047	1.46483	1.69689	2.02934	2.66404	3.45409	4.66038	6.62134	9.52488	15.302	23.017	47.7003
0.174572	0.317464	0.444485	0.570909	0.696058	0.814981	0.938866	1.07083	1.23077	1.46613	1.69761	2.02934	2.68464	3.46359	4.66118	6.62171	9.53443	15.3311	23.02	47.7031
0.174812	0.317664	0.444652	0.571101	0.697105	0.814986	0.938961	1.07086	1.23211	1.46811	1.69825	2.03185	2.68604	3.46576	4.6693	6.62628	9.55655	15.3324	23.0233	47.8493
0.175128	0.317731	0.444841	0.571437	0.697816	0.816048	0.939505	1.07106	1.23365	1.46856	1.69976	2.03348	2.68838	3.46858	4.6693	6.62833	9.57238	15.3341	23.1134	47.897
0.175147	0.318078	0.444996	0.571495	0.698594	0.816087	0.940312	1.07229	1.23497	1.46904	1.69981	2.03433	2.69053	3.46928	4.66961	6.64438	9.59751	15.3708	23.138	47.9536
0.175325	0.318132	0.445083	0.571614	0.6989	0.816417	0.941299	1.07283	1.2354	1.4697	1.70007	2.03581	2.69193	3.47068	4.67578	6.65518	9.60081	15.3872	23.1655	47.9867
0.175396	0.318168	0.445461	0.571699	0.70052	0.816565	0.941941	1.07368	1.23692	1.4723	1.70029	2.03785	2.69271	3.48029	4.67712	6.689	9.61464	15.3957	23.1939	47.9908
0.175407	0.318239	0.445758	0.57233	0.701583	0.81707	0.942228	1.07392	1.24023	1.47331	1.7031	2.03816	2.69627	3.48029	4.68225	6.68958	9.61663	15.4067	23.2003	48.0041
0.175422	0.318269	0.445764	0.572586	0.702666	0.817172	0.942295	1.0742	1.24023	1.47362	1.70363	2.03869	2.6984	3.48324	4.68225	6.70554	9.62948	15.4158	23.2198	48.0236
0.175454	0.318823	0.445881	0.572714	0.702922	0.817565	0.942508	1.0748	1.24023	1.4738	1.7038	2.03958	2.71096	3.48422	4.7103	6.7064	9.6732	15.4172	23.223	48.042
0.175469	0.318852	0.445925	0.573291	0.702939	0.817814	0.943116	1.07501	1.24028	1.47522	1.7038	2.04096	2.71695	3.48451	4.71168	6.70682	9.6768	15.4213	23.2535	48.2294
0.175646	0.318877	0.446158	0.573418	0.70343	0.817902	0.943506	1.07553	1.24097	1.47656	1.70459	2.04104	2.71754	3.48519	4.71779	6.71058	9.68238	15.4378	23.2675	48.3328
0.175809	0.319021	0.446853	0.573742	0.703773	0.818284	0.943984	1.07671	1.24149	1.47656	1.70583	2.04359	2.71819	3.49013	4.73257	6.71705	9.68266	15.4439	23.2792	48.5791
0.176046	0.319216	0.447492	0.574539	0.704087	0.819244	0.944563	1.07852	1.24211	1.47656	1.70763	2.05031	2.71933	3.49699	4.73371	6.73694	9.68559	15.4883	23.4179	48.6116
0.176166	0.319228	0.447683	0.574895	0.705016	0.81986	0.944752	1.08131	1.24223	1.47656	1.70764	2.05399	2.72852	3.49946	4.73371	6.75555	9.68669	15.5017	23.4229	48.6656
0.176176	0.319235	0.447934	0.574908	0.705511	0.820766	0.947137	1.08194	1.24355	1.47675	1.7079	2.05409	2.73147	3.50185	4.73639	6.7575	9.71651	15.5195	23.4318	48.733
0.176226	0.319446	0.448118	0.575107	0.70563	0.821427	0.94767	1.08254	1.24388	1.47789	1.7122	2.05433	2.73641	3.50253	4.74338	6.7575	9.76808	15.5215	23.4545	48.7903
0.176259	0.319677	0.448793	0.575146	0.706212	0.822178	0.947802	1.08283	1.24452	1.4779	1.71354	2.05903	2.73876	3.51454	4.75286	6.7575	9.84375	15.5215	23.4909	48.8356
0.176273	0.319709	0.448793	0.575545	0.70635	0.82239	0.948514	1.08352	1.24498	1.47803	1.7137	2.06678	2.74174	3.52353	4.75725	6.76328	9.84375	15.5499	23.5375	49.0338
0.176284	0.319776	0.448999	0.57566	0.706555	0.824755	0.949064	1.08367	1.24501	1.47962	1.7144	2.07185	2.74218	3.52353	4.76097	6.77121	9.90814	15.5573	23.565	49.2206
0.17633	0.320123	0.449004	0.576407	0.70711	0.825144	0.949282	1.08434	1.24656	1.47991	1.71461	2.07542	2.74513	3.53069	4.77487	6.77794	9.92586	15.5646	23.582	49.2355
0.176423	0.32015	0.449348	0.576653	0.707813	0.826626	0.950887	1.08567	1.24867	1.48142	1.71507	2.08146	2.74575	3.53383	4.77828	6.78949	9.93481	15.5668	23.6365	49.3599
0.176484	0.320372	0.449956	0.577542	0.708033	0.826987	0.95113	1.08618	1.24955	1.4849	1.71583	2.08261	2.75141	3.53655	4.78047	6.80662	9.94814	15.6594	23.6426	49.4064
0.176495	0.320541	0.450402	0.577921	0.708726	0.828634	0.951246	1.08619	1.24991	1.48782	1.71766	2.08529	2.75843	3.53754	4.78099	6.82132	9.96939	15.6697	23.6691	49.5163
0.176669	0.320772	0.450467	0.578408	0.708982	0.829331	0.951483	1.08675	1.25026	1.48877	1.71796	2.08586	2.75965	3.54921	4.78827	6.82254	9.97211	15.6768	23.7235	49.6652
0.176813	0.320885	0.450495	0.578787	0.709926	0.829752	0.951819	1.08813	1.25044	1.49063	1.72069	2.08817	2.7616	3.55097	4.79481	6.8236	9.97286	15.6822	23.7356	49.6899
0.176818	0.320956	0.451568	0.579169	0.710619	0.829771	0.951893	1.08856	1.25073	1.49081	1.72266	2.08817	2.76184	3.55114	4.81113	6.82439	9.99335	15.6829	23.74	49.8976
0.177075	0.32133	0.451857	0.579212	0.710667	0.830235	0.953131	1.08914	1.2516	1.49189	1.72266	2.08817	2.76306	3.55143	4.81642	6.83594	9.99335	15.6934	23.7849	49.9576
0.177582	0.321913	0.452563	0.579308	0.711034	0.830639	0.953177	1.08917	1.25217	1.49304	1.72266	2.08817	2.76463	3.55149	4.82673	6.84022	10.0417	15.7101	23.8096	50.119
0.177767	0.321996	0.452586	0.579487	0.711272	0.830703	0.953211	1.08921	1.25223	1.49487	1.72568	2.08817	2.76526	3.55456	4.83093	6.84211	10.0898	15.7247	23.8442	50.1379
0.177807	0.322046	0.452621	0.580162	0.711334	0.830769	0.953289	1.08997	1.25298	1.49693	1.72789	2.0887	2.76924	3.57002	4.85011	6.84928	10.0898	15.75	23.846	50.1644
0.177863	0.322116	0.453052	0.58099	0.711677	0.832546	0.953544	1.09023	1.25476	1.49693	1.72949	2.08979	2.77041	3.57362	4.85155	6.84967	10.0898	15.7558	23.8461	50.2367
0.177939	0.322348	0.453102	0.581083	0.712471	0.832895	0.953698	1.09024	1.25484	1.49693	1.73294	2.09229	2.77325	3.58195	4.86571	6.85196	10.1139	15.8132	23.8559	50.4348
0.177957	0.322478	0.453397	0.581466	0.712986	0.833124	0.953872	1.09091	1.25484	1.49693	1.73335	2.10008	2.77325	3.58318	4.86864	6.85538	10.1467	15.8456	23.8582	50.4412
0.177967	0.322702	0.453706	0.581651	0.713373	0.833225	0.95429	1.09399	1.25484	1.49708	1.73383	2.10031	2.77911	3.58987	4.87335	6.85991	10.1524	15.8729	23.8655	50.4479
0.17797	0.322728	0.454164	0.581696	0.713542	0.833227	0.954306	1.09405	1.25484	1.49741	1.73402	2.10263	2.78423	3.61261	4.87596	6.86092	10.1634	15.8871	23.8886	50.7946
0.17802	0.322755	0.454197	0.58173	0.713641	0.834475	0.95445	1.09436	1.25484	1.49883	1.73707	2.10263	2.79511	3.61599	4.88082	6.87665	10.167	15.9042	23.9028	50.8579
0.178023	0.322764	0.454234	0.581787	0.71372	0.834782	0.95487	1.09501	1.25484	1.49907	1.74015	2.10491	2.79929	3.61726	4.88798	6.88151	10.2135	15.9179	23.9143	50.8593
0.178109	0.323086	0.454591	0.582173	0.713847	0.83506	0.956236	1.09512	1.25484	1.50115	1.74015	2.10597	2.8059	3.62406	4.88856	6.89502	10.2149	15.9406	23.9621	50.8733
0.178247	0.323177	0.454794	0.583252	0.714098	0.836227	0.956758	1.09513	1.25484	1.50344	1.74015	2.10622	2.8059	3.62964	4.8942	6.89741	10.2244	15.9418	23.9632	50.8885
0.178368	0.323244	0.454891	0.583505	0.714172	0.836374	0.956799	1.09526	1.25484	1.50416	1.74015	2.10814	2.8059	3.63098	4.89567	6.91916	10.2469	15.9437	24.0008	50.9101
0.178376	0.323338	0.455146	0.583581	0.714289	0.836803	0.95686	1.09579	1.25784	1.50659	1.74015	2.11345	2.81202	3.64186	4.90096	6.92386	10.2887	15.9644	24.0682	50.9788
0.178398	0.323611	0.455727	0.583836	0.714719	0.836857	0.957968	1.09591	1.25872	1.50752	1.74015	2.11421	2.81477	3.64736	4.91304	6.92503	10.2998	15.9657	24.1021	51.0956
0.178403	0.323648	0.456031	0.583885	0.715061	0.837857	0.958954	1.09848	1.25968	1.50922	1.74086	2.11662	2.81552	3.65012	4.92087	6.93707	10.3037	15.9961	24.1049	51.2088
0.178523	0.323776	0.456688	0.583888	0.715839	0.838689	0.960231	1.0986	1.26007	1.50949	1.74321	2.11663	2.81552	3.65216	4.9236	6.94356	10.3383	16.0433	24.1285	51.4502
0.178532	0.324147	0.457649	0.58398	0.71643	0.838876	0.961106	1.10013	1.26101	1.50981	1.74433	2.11698	2.82302	3.65259	4.92426	6.94912	10.4051	16.046	24.1325	51.5982
0.178751	0.324393	0.458221	0.584177	0.716492	0.839464	0.96148	1.10024	1.26193	1.51159	1.74668	2.11698	2.82335	3.65354	4.92564	6.96058	10.4079	16.049	24.2938	51.6218
0.178994	0.32443	0.458512	0.584311	0.716749	0.839936	0.961989	1.10046	1.26629	1.51355	1.74721	2.11698	2.82369	3.65758	4.94131	6.96493	10.4462	16.0527	24.3159	51.7078
0.17919	0.324499	0.459141	0.584474	0.716826	0.839957	0.962611	1.10056	1.26711	1.51383	1.7498	2.12077	2.82684	3.65845	4.94443	6.9661	10.4467	16.0698	24.3745	51.7581
0.17921	0.324937	0.45921	0.585219	0.717803	0.840128	0.962996	1.10056	1.26979	1.51471	1.75203	2.12127	2.83581	3.65845	4.94762	6.96928	10.464	16.0767	24.4805	51.9455
0.17927	0.325084	0.459481	0.585476	0.717816	0.840813	0.963974	1.10056	1.27039	1.51541	1.7552	2.13054	2.84492	3.66485	4.94973	6.96928	10.4835	16.1024	24.5279	52.0275
0.179304	0.325139	0.459589	0.585872	0.718566	0.840946	0.964379	1.10056	1.27097	1.51598	1.75963	2.13249	2.84521	3.68603	4.95848	6.96928	10.4929	16.1071	24.5374	52.2856
0.179312	0.325145	0.459718	0.586531	0.719137	0.84105	0.964533	1.10056	1.27153	1.51804	1.75984	2.13362	2.84765	3.68761	4.95979	6.9953	10.4981	16.1272	24.6304	52.4665
0.179321	0.325441	0.459998	0.587528	0.719327	0.841394	0.966549	1.10056	1.27153	1.51989	1.76066	2.13378	2.84966	3.68975	4.98092	6.9953	10.5486	16.2456	24.6664	52.4705
0.179623	0.325681	0.460085	0.587556	0.719341	0.841612	0.967023	1.10056	1.27163	1.52067	1.76211	2.13391	2.85413	3.69141	4.98196	6.9953	10.5521	16.2485	24.7265	52.6016
0.179695	0.325834	0.46019	0.587904	0.719812	0.841666	0.968011	1.10122	1.27163	1.52084	1.76399	2.13551	2.86233	3.69141	4.98302	6.9953	10.5716	16.2501	24.7456	52.6482
0.179795	0.326314	0.460755	0.588134	0.720445	0.842215	0.968796	1.10141	1.27201	1.52107	1.76568	2.13563	2.8644	3.69607	4.98302	7.0004	10.5849	16.2623	24.7578	52.7034
0.179914	0.326619	0.461071	0.588545	0.720562	0.842463	0.968883	1.1021	1.27533	1.52162	1.768	2.13697	2.8647	3.6996	5.01553	7.0004	10.5933	16.3333	24.7713	52.7178
0.179941	0.326634	0.461332	0.588926	0.721017	0.842748	0.970756	1.10371	1.27664	1.52226	1.77021	2.13732	2.86992	3.70602	5.01935	7.01023	10.5937	16.3822	24.811	52.7285
0.179991	0.32667	0.46147	0.588949	0.72107	0.843001	0.972207	1.10395	1.27687	1.5239	1.77166	2.14187	2.86992	3.70998	5.02533	7.01153	10.6005	16.3922	24.8292	52.7336
0.180368	0.326817	0.461516	0.589007	0.72181	0.843874	0.972682	1.10676	1.27773	1.5245	1.77346	2.14211	2.86992	3.71004	5.03059	7.01372	10.603	16.4058	24.8744	52.7336
0.180538	0.327103	0.461978	0.5891	0.722259	0.843986	0.973112	1.10783	1.27804	1.52585	1.77461	2.14499	2.87274	3.711	5.03404	7.019	10.6476	16.4165	24.9042	52.9591
0.180573	0.327157	0.462456	0.589164	0.722895	0.844393	0.973183	1.10838	1.28206	1.52603	1.77461	2.14507	2.87566	3.71749	5.03817	7.02295	10.6952	16.4493	24.9078	53.1842
0.18074	0.327263	0.462827	0.589347	0.723494	0.845181	0.974024	1.10874	1.28304	1.52841	1.77461	2.14876	2.8762	3.71851	5.04398	7.02475	10.7534	16.4607	24.9382	53.3578
0.181122	0.327346	0.463084	0.589594	0.724745	0.845334	0.974141	1.1093	1.28339	1.52902	1.77461	2.15134	2.88045	3.72	5.05137	7.03444	10.754	16.4838	24.9686	53.4724
0.181298	0.327372	0.46317	0.589617	0.724846	0.845383	0.974474	1.1093	1.28438	1.53038	1.77461	2.15434	2.88045	3.72531	5.06045	7.03828	10.7703	16.4864	24.9932	53.7094
0.181341	0.327451	0.463247	0.589978	0.724941	0.845689	0.975666	1.11253	1.28541	1.53086	1.77461	2.16274	2.88135	3.72637	5.06738	7.05135	10.7813	16.4923	24.9939	53.793
0.181383	0.327647	0.463338	0.590489	0.725344	0.845775	0.977465	1.11486	1.2856	1.53301	1.77484	2.16751	2.88168	3.73041	5.06738	7.06923	10.7835	16.5098	25.0554	54.6688
0.181421	0.327807	0.4636	0.590823	0.725745	0.84642	0.977791	1.11494	1.2866	1.53422	1.77526	2.17461	2.8912	3.73126	5.07105	7.10269	10.8032	16.5176	25.0714	54.6727
0.181445	0.32794	0.463725	0.590987	0.726001	0.846455	0.977866	1.11569	1.29145	1.5343	1.7796	2.18119	2.89426	3.73363	5.07335	7.123	10.8066	16.518	25.1586	54.7867
0.181497	0.32832	0.463734	0.592352	0.726506	0.848586	0.978069	1.11574	1.29184	1.53463	1.78186	2.18389	2.898	3.73524	5.07335	7.12345	10.8188	16.5333	25.1805	54.7911
0.181512	0.328551	0.46553	0.592614	0.726781	0.848734	0.97843	1.12022	1.29331	1.53655	1.78221	2.19098	2.90331	3.73603	5.07335	7.13168	10.847	16.5356	25.2199	54.8325
0.181525	0.328581	0.465673	0.593132	0.727028	0.84881	0.979167	1.12071	1.29416	1.538	1.7825	2.19262	2.90334	3.74815	5.07335	7.15367	10.8477	16.5379	25.3003	55.0909
0.181597	0.328592	0.465802	0.593156	0.727038	0.848928	0.9805	1.12251	1.29566	1.53807	1.78337	2.19372	2.90501	3.7528	5.07335	7.1748	10.8514	16.5705	25.3209	55.1773
0.181632	0.329088	0.465821	0.593963	0.727082	0.849879	0.981529	1.12286	1.29838	1.53893	1.78413	2.19431	2.91043	3.75363	5.08683	7.17571	10.8791	16.6234	25.3369	55.1814
0.181839	0.329122	0.466681	0.594321	0.727514	0.850385	0.982636	1.1231	1.29873	1.53938	1.78451	2.19462	2.91462	3.75411	5.08847	7.20562	10.8882	16.6407	25.3702	55.2947
0.181924	0.32967	0.466785	0.594328	0.727607	0.850687	0.983988	1.12312	1.29879	1.53941	1.78545	2.19486	2.9172	3.75846	5.09804	7.21659	10.9258	16.6491	25.4689	55.4465
0.181934	0.329676	0.467423	0.594898	0.727788	0.85146	0.984077	1.12355	1.29942	1.53994	1.78869	2.19499	2.91757	3.76451	5.09994	7.22185	10.9482	16.65	25.491	55.5147
0.182106	0.32979	0.467434	0.595177	0.729465	0.852183	0.984375	1.12419	1.30036	1.54062	1.78869	2.20113	2.91986	3.76451	5.10474	7.23783	10.9643	16.6688	25.5065	55.6877
0.182126	0.330263	0.46748	0.59549	0.72969	0.852423	0.984375	1.12617	1.30408	1.54149	1.78869	2.20113	2.92064	3.76451	5.10853	7.23834	11.0248	16.6756	25.5808	55.7516
0.18224	0.330263	0.467581	0.595516	0.729963	0.85304	0.984683	1.12654	1.30448	1.54208	1.78869	2.20513	2.93542	3.77489	5.11268	7.24809	11.0304	16.6886	25.5829	56.0855
0.182295	0.33066	0.467753	0.596441	0.73033	0.855132	0.985917	1.12673	1.30526	1.54349	1.79057	2.20545	2.93745	3.77633	5.11596	7.26706	11.0605	16.6937	25.597	56.2495
0.182556	0.33078	0.46789	0.596794	0.730746	0.855362	0.986523	1.12691	1.30528	1.54369	1.79159	2.20785	2.94247	3.77752	5.12691	7.26706	11.0779	16.7484	25.6693	56.385
0.182813	0.330821	0.468408	0.597126	0.73093	0.855391	0.987685	1.12716	1.30662	1.54455	1.79159	2.2084	2.95312	3.78509	5.13399	7.28636	11.0988	16.7602	25.7135	56.3903
0.182835	0.330864	0.468714	0.597446	0.73098	0.855721	0.988113	1.12781	1.30665	1.54461	1.79264	2.21411	2.95312	3.79017	5.13792	7.28895	11.1043	16.7631	25.7227	56.5807
0.183102	0.331774	0.46923	0.597682	0.731724	0.855762	0.989817	1.12851	1.30682	1.54466	1.79286	2.21484	2.95312	3.79706	5.13816	7.30096	11.1183	16.7802	25.7334	56.6256
0.183118	0.331816	0.469326	0.598081	0.732628	0.855948	0.990065	1.12908	1.30853	1.54483	1.80058	2.21484	2.95328	3.80633	5.13859	7.30447	11.1722	16.8213	25.735	56.6647
0.183155	0.331848	0.469334	0.598211	0.73287	0.856199	0.990298	1.12918	1.31066	1.54663	1.80133	2.22186	2.95634	3.81236	5.13898	7.30861	11.2285	16.83	25.777	56.7254
0.183162	0.33185	0.469704	0.598583	0.73312	0.856492	0.990431	1.13	1.31355	1.54706	1.81151	2.22382	2.96336	3.81579	5.14768	7.31689	11.2308	16.8354	25.7838	56.7944
0.183179	0.331919	0.469846	0.598585	0.733415	0.857883	0.990861	1.13107	1.31536	1.5472	1.8136	2.22847	2.96336	3.81607	5.14881	7.32467	11.2492	16.8458	25.8171	57.5795
0.183336	0.331954	0.470032	0.598696	0.733502	0.859114	0.991199	1.13189	1.31584	1.54789	1.81405	2.22847	2.96336	3.81681	5.14902	7.33652	11.253	16.8675	25.8205	57.7076
0.18337	0.332069	0.470089	0.598814	0.733521	0.859277	0.991346	1.1319	1.3196	1.54863	1.81492	2.22847	2.96336	3.8204	5.16797	7.34168	11.2787	16.8814	25.8417	57.8577
0.183435	0.332122	0.470603	0.59961	0.733564	0.859453	0.991755	1.13196	1.31985	1.55024	1.81588	2.22847	2.96532	3.82337	5.17382	7.34395	11.2908	16.8964	25.8565	58.0025
0.183535	0.332136	0.470726	0.599665	0.733978	0.859738	0.992371	1.1329	1.31998	1.55107	1.82002	2.22847	2.96629	3.82832	5.17382	7.34603	11.2967	16.9321	25.9568	58.1476
0.183643	0.332166	0.470999	0.600986	0.734776	0.8599	0.994243	1.13417	1.32526	1.55111	1.82011	2.22847	2.97356	3.83686	5.18211	7.35304	11.2987	16.9466	26.0914	58.1558
0.183654	0.332475	0.471039	0.601145	0.73608	0.860296	0.994276	1.13451	1.32526	1.55156	1.8228	2.22869	2.97394	3.83792	5.19756	7.37037	11.3155	16.9589	26.1022	58.2127
0.183766	0.33251	0.471375	0.601528	0.736114	0.860764	0.994443	1.13454	1.32526	1.55643	1.82529	2.23018	2.98159	3.84009	5.21489	7.37231	11.3336	16.9929	26.1329	58.291
0.183788	0.333206	0.471797	0.601743	0.736229	0.860835	0.994487	1.13702	1.32526	1.55643	1.82601	2.2327	2.98206	3.84392	5.21489	7.38622	11.3364	17.0056	26.2952	58.4106
0.183848	0.333272	0.472109	0.601756	0.736498	0.861001	0.994706	1.13825	1.32526	1.55643	1.82829	2.23329	2.98402	3.84411	5.22044	7.38936	11.3734	17.018	26.3182	58.7262
0.184008	0.333292	0.472223	0.602536	0.736542	0.86177	0.994763	1.13904	1.32526	1.55643	1.8293	2.23565	2.98688	3.84411	5.22044	7.41313	11.374	17.0392	26.4048	58.9157
0.184032	0.333377	0.472271	0.602589	0.736851	0.861847	0.996214	1.13989	1.32526	1.55643	1.82976	2.23576	2.98716	3.85198	5.22363	7.41503	11.3844	17.0445	26.4193	59.1496
0.184107	0.333414	0.472362	0.602842	0.736941	0.862469	0.996732	1.14162	1.32526	1.55871	1.83117	2.2368	2.98975	3.85616	5.23526	7.41522	11.3972	17.0624	26.4573	59.1806
0.18413	0.33364	0.473273	0.602992	0.737158	0.863299	0.997243	1.14405	1.32526	1.5595	1.83378	2.23913	2.99386	3.86336	5.24257	7.41849	11.4099	17.0637	26.4651	59.2754
0.18416	0.334046	0.473363	0.605085	0.737212	0.863756	0.998601	1.14615	1.32526	1.55969	1.83395	2.2425	2.99386	3.87002	5.2495	7.45701	11.4099	17.1065	26.5163	59.4071
0.184235	0.334173	0.473584	0.605128	0.737285	0.864335	0.99865	1.14632	1.32601	1.56038	1.8344	2.24375	2.99749	3.87026	5.25987	7.48465	11.448	17.1102	26.5348	59.518
0.18427	0.334413	0.473729	0.605449	0.737709	0.864419	0.999935	1.14634	1.32638	1.5631	1.83585	2.24401	2.99855	3.87215	5.26088	7.48465	11.455	17.1105	26.5375	59.5628
0.184273	0.334617	0.473817	0.60565	0.738281	0.864704	1.00053	1.14712	1.32752	1.56702	1.8418	2.25726	3.00202	3.88255	5.27181	7.48618	11.4797	17.1337	26.5992	59.6543
0.184713	0.334792	0.474196	0.606049	0.738281	0.866178	1.00159	1.14816	1.3282	1.56796	1.84536	2.25787	3.01222	3.88803	5.27763	7.48704	11.4806	17.1367	26.6167	59.7663
0.184729	0.334811	0.474644	0.606944	0.738281	0.866616	1.0016	1.14886	1.32831	1.57057	1.84633	2.25874	3.0187	3.89108	5.28017	7.49113	11.5325	17.182	26.6492	59.8011
0.184761	0.334905	0.474657	0.607309	0.738281	0.867114	1.00182	1.14904	1.32994	1.57136	1.85278	2.25999	3.02318	3.89108	5.28386	7.50081	11.569	17.2006	26.6945	59.9146
0.185001	0.335032	0.475072	0.607713	0.738281	0.867261	1.00234	1.14971	1.33027	1.57192	1.85318	2.26589	3.03443	3.89108	5.28577	7.50081	11.5912	17.2141	26.7546	59.9208
0.185008	0.335239	0.475279	0.608031	0.738281	0.867269	1.00366	1.15095	1.33057	1.57241	1.85389	2.26806	3.04332	3.90011	5.29967	7.50081	11.6319	17.2283	26.7953	60.1758
0.185076	0.335297	0.475575	0.608509	0.738359	0.867627	1.00444	1.15384	1.33111	1.57439	1.8549	2.26887	3.04401	3.90044	5.3086	7.51165	11.6396	17.2783	26.8291	60.3564
0.185113	0.335352	0.475689	0.608647	0.739125	0.868465	1.00511	1.15416	1.33114	1.57505	1.85715	2.26887	3.04401	3.90718	5.32382	7.5189	11.6409	17.2797	26.8558	60.4008
0.185131	0.335661	0.476443	0.60975	0.739176	0.86898	1.00526	1.15504	1.3317	1.57577	1.858	2.26887	3.04408	3.91742	5.32382	7.55951	11.6639	17.2868	26.9012	60.6536
0.185195	0.335768	0.476454	0.610165	0.739245	0.86964	1.0053	1.15521	1.33222	1.57577	1.85934	2.26887	3.04806	3.91743	5.3699	7.57303	11.6681	17.297	26.9155	60.7368
0.185379	0.335815	0.477059	0.610479	0.739347	0.869973	1.00585	1.15609	1.33323	1.57577	1.86193	2.27071	3.04985	3.92944	5.37125	7.58505	11.694	17.2985	26.9728	60.7575
0.185383	0.336049	0.477321	0.611058	0.739694	0.870276	1.00673	1.1575	1.33323	1.57577	1.86216	2.27277	3.05265	3.9375	5.37477	7.58667	11.6943	17.3018	26.9911	60.7636
0.185389	0.336073	0.477442	0.611525	0.740941	0.871548	1.00683	1.15797	1.33363	1.57577	1.8623	2.27828	3.05335	3.9375	5.38828	7.58988	11.7048	17.3064	27.0021	60.8335
0.185534	0.336166	0.477701	0.613384	0.742019	0.871609	1.0078	1.15899	1.33499	1.57577	1.86231	2.28603	3.05591	3.94518	5.39726	7.59099	11.7293	17.3096	27.0287	60.8407
0.185568	0.336206	0.478215	0.613415	0.742065	0.871842	1.00878	1.16134	1.33509	1.57577	1.86689	2.2872	3.06317	3.94518	5.39726	7.59918	11.7525	17.3426	27.0543	60.9299
0.185617	0.336234	0.478487	0.613965	0.7422	0.871861	1.00886	1.16303	1.33516	1.57865	1.86848	2.29	3.06487	3.9491	5.40286	7.60107	11.7607	17.3685	27.0709	61.0585
0.185691	0.336394	0.478552	0.614014	0.742328	0.872071	1.00941	1.16367	1.33539	1.57958	1.86861	2.29056	3.06821	3.95279	5.40608	7.61668	11.7637	17.3753	27.082	61.1078
0.185765	0.3364	0.478942	0.614129	0.742764	0.872369	1.00944	1.16466	1.33544	1.58271	1.87014	2.29213	3.07095	3.96202	5.4092	7.63083	11.7882	17.3753	27.1819	61.1741
0.185924	0.336769	0.479036	0.61434	0.742866	0.872418	1.00954	1.16498	1.33576	1.5874	1.87215	2.29298	3.07203	3.96814	5.41965	7.63287	11.8296	17.3836	27.2005	61.3682
0.186154	0.337099	0.47927	0.614907	0.743288	0.872782	1.0108	1.1667	1.33577	1.5875	1.87419	2.29375	3.07445	3.97577	5.4278	7.63432	11.8424	17.3962	27.2602	61.3886
0.186176	0.337258	0.479285	0.615234	0.743382	0.874133	1.01153	1.16731	1.33592	1.58827	1.87419	2.29685	3.07773	3.98101	5.433	7.63913	11.8719	17.4011	27.3277	61.6782
0.186193	0.337369	0.479368	0.615681	0.74358	0.875153	1.0125	1.16818	1.33997	1.58827	1.87419	2.30359	3.0814	3.98775	5.44038	7.6408	11.8953	17.4162	27.3932	62.0302
0.186391	0.337704	0.479623	0.615755	0.74385	0.876122	1.01328	1.16833	1.34004	1.58827	1.87419	2.30815	3.08355	3.9918	5.4456	7.65664	11.9146	17.4484	27.5433	62.4232
0.186417	0.337905	0.4802	0.615854	0.744066	0.876206	1.01384	1.1686	1.34109	1.58827	1.87419	2.31222	3.08355	4.00225	5.46041	7.65828	11.9146	17.4517	27.6089	62.5929
0.186419	0.338029	0.481232	0.616119	0.744141	0.876213	1.014	1.16965	1.34129	1.58827	1.87419	2.31672	3.08355	4.00612	5.46417	7.66455	11.9302	17.4935	27.6409	62.6027
0.18657	0.338032	0.481235	0.616308	0.74441	0.876982	1.01467	1.16972	1.34309	1.59276	1.87475	2.32012	3.09208	4.01171	5.46417	7.66455	11.9423	17.4976	27.6645	62.6673
0.18659	0.338084	0.483236	0.616709	0.744411	0.877864	1.01467	1.17193	1.34326	1.59303	1.87823	2.32164	3.09275	4.01253	5.46564	7.67243	11.9694	17.5005	27.6645	62.7312
0.18668	0.338381	0.483333	0.61697	0.744605	0.878068	1.01467	1.17241	1.34329	1.59325	1.87843	2.32164	3.09497	4.01765	5.47639	7.69172	11.9936	17.5392	27.6721	62.7955
0.186769	0.338659	0.483457	0.617342	0.745052	0.878363	1.01467	1.17446	1.3443	1.59365	1.88	2.32164	3.1023	4.01801	5.47897	7.69731	12.0015	17.5597	27.7112	62.9642
0.186842	0.338966	0.48432	0.617659	0.745311	0.880526	1.01467	1.17449	1.34462	1.59458	1.88198	2.32326	3.11096	4.01944	5.50282	7.70788	12.0135	17.57	27.7203	63.0864
0.186941	0.339269	0.484489	0.618225	0.745434	0.882491	1.01467	1.17556	1.34636	1.59773	1.88201	2.32868	3.11107	4.03624	5.50282	7.75361	12.0176	17.5702	27.8521	63.142
0.187228	0.339372	0.484727	0.618327	0.745465	0.883391	1.01467	1.17668	1.34772	1.59846	1.88361	2.32899	3.11149	4.04034	5.51315	7.77662	12.0209	17.612	27.9173	63.4469
0.187311	0.339557	0.484742	0.618332	0.745792	0.884012	1.01467	1.18004	1.34794	1.59859	1.89461	2.33246	3.11287	4.04083	5.51638	7.77895	12.0209	17.6377	27.937	63.7877
0.187419	0.33979	0.48502	0.619103	0.746344	0.884797	1.01467	1.18029	1.34917	1.59941	1.89512	2.33371	3.11287	4.04086	5.52085	7.78051	12.0318	17.6408	27.9412	63.9181
0.187504	0.339822	0.485997	0.619321	0.746458	0.884839	1.01467	1.18095	1.35102	1.59962	1.89914	2.33453	3.11556	4.04289	5.52366	7.7875	12.0686	17.6414	28.1816	64.0416
0.187525	0.340127	0.486039	0.620178	0.746759	0.88499	1.01467	1.18194	1.35687	1.60039	1.90322	2.33465	3.11838	4.05068	5.52369	7.79123	12.0717	17.6451	28.2097	64.1932
0.187728	0.340269	0.486125	0.620309	0.746772	0.885095	1.01467	1.18252	1.35773	1.60128	1.90346	2.33465	3.1203	4.05151	5.53027	7.82909	12.0907	17.6987	28.32	64.2423
0.187917	0.341194	0.486911	0.620433	0.747195	0.885544	1.01467	1.18296	1.36172	1.6036	1.90488	2.33623	3.12106	4.06361	5.53027	7.84804	12.1044	17.6988	28.3512	64.8814
0.188113	0.341197	0.487289	0.620441	0.74757	0.885563	1.01467	1.18304	1.36241	1.60396	1.91	2.33786	3.12326	4.06381	5.53459	7.86346	12.1087	17.7113	28.4076	65.7792
0.188338	0.341566	0.487702	0.621135	0.747998	0.885972	1.01467	1.18579	1.36357	1.60403	1.91002	2.33832	3.12756	4.06799	5.53647	7.88407	12.1561	17.7174	28.6928	66.456
0.188359	0.34195	0.488574	0.621346	0.748236	0.886068	1.01467	1.18625	1.36416	1.60407	1.91108	2.34351	3.13226	4.06811	5.56914	7.91583	12.1911	17.7188	28.6992	66.9113
0.188385	0.342335	0.488711	0.621979	0.74831	0.886129	1.01495	1.18722	1.36459	1.60618	1.91312	2.34377	3.13226	4.08129	5.57163	7.91757	12.2187	17.7273	28.7467	66.9447
0.188469	0.342432	0.488871	0.622192	0.749201	0.886273	1.01525	1.18728	1.36581	1.60788	1.91687	2.35066	3.13562	4.0815	5.57933	7.92904	12.2488	17.804	28.7687	67.0139
0.188675	0.342447	0.489167	0.622519	0.750587	0.886777	1.01527	1.18836	1.36632	1.6083	1.92	2.35992	3.13564	4.082	5.59019	7.93797	12.2874	17.8111	28.8192	67.0765
0.188879	0.342542	0.489289	0.622871	0.751582	0.887304	1.01574	1.19123	1.36643	1.60999	1.92205	2.35993	3.1481	4.08247	5.59404	7.96423	12.3055	17.813	28.8471	67.4396
0.18903	0.342669	0.489875	0.623184	0.751884	0.887304	1.01625	1.19162	1.3673	1.61012	1.92205	2.37642	3.15154	4.08879	5.60177	7.967	12.3115	17.8135	28.9524	68.2284
0.18907	0.342688	0.490435	0.623353	0.752171	0.887304	1.01737	1.19226	1.36928	1.61023	1.92205	2.37696	3.15154	4.09139	5.61499	7.97294	12.3486	17.8209	28.9602	68.3561
0.189161	0.342917	0.490631	0.623389	0.752629	0.887304	1.01752	1.19227	1.36951	1.61035	1.92205	2.38596	3.15154	4.09956	5.61608	7.99208	12.3506	17.8295	29.0657	68.5008
0.189261	0.343062	0.491226	0.623592	0.753747	0.887304	1.01867	1.19396	1.36967	1.6145	1.92205	2.38765	3.15154	4.10812	5.61719	8.02614	12.3663	17.8315	29.071	68.6882
0.189332	0.343398	0.491686	0.623592	0.75382	0.887304	1.01965	1.19461	1.37323	1.6146	1.92205	2.38941	3.15614	4.12528	5.62258	8.06616	12.3856	17.8414	29.2116	68.7945
0.189387	0.34344	0.49175	0.625042	0.753939	0.887304	1.01981	1.19548	1.37775	1.61538	1.92205	2.39179	3.15654	4.13362	5.62711	8.07801	12.393	17.8543	29.2283	68.9312
0.18948	0.343552	0.491763	0.62528	0.753992	0.887304	1.01985	1.19606	1.37818	1.61629	1.92205	2.39367	3.15886	4.14313	5.6278	8.08203	12.4041	17.8689	29.24	69.0485
0.18949	0.343553	0.492188	0.625354	0.754182	0.887304	1.02107	1.19623	1.37828	1.61639	1.92205	2.39405	3.15905	4.14488	5.62976	8.12109	12.4402	17.8888	29.2479	69.1383
0.189611	0.343605	0.492188	0.625547	0.754853	0.887304	1.02116	1.19765	1.38075	1.61734	1.92554	2.4063	3.16247	4.15259	5.63178	8.12359	12.4608	17.9022	29.3862	69.51
0.189642	0.344004	0.492188	0.625995	0.755619	0.887304	1.02336	1.19787	1.38112	1.61865	1.92659	2.40689	3.1787	4.16163	5.63499	8.12942	12.4668	17.9106	29.3884	70.2295
0.189706	0.344271	0.492188	0.626708	0.757113	0.887304	1.025	1.19817	1.38115	1.62071	1.92723	2.42198	3.18181	4.16456	5.6655	8.13487	12.4758	17.9299	29.6851	70.691
0.189876	0.34453	0.492188	0.628378	0.758382	0.887304	1.02593	1.19872	1.38328	1.62102	1.92915	2.42265	3.18345	4.17019	5.6655	8.15458	12.4931	17.9333	29.7459	71.318
0.190073	0.344682	0.492188	0.629037	0.759243	0.887304	1.02834	1.19888	1.38423	1.62204	1.93125	2.43125	3.18581	4.1708	5.66977	8.15674	12.5019	17.9396	29.7844	71.3863
0.190134	0.344718	0.492188	0.629118	0.759376	0.887304	1.0287	1.20113	1.3854	1.62749	1.93242	2.4362	3.18771	4.17128	5.67224	8.18054	12.5024	17.9433	29.7977	71.99
0.190156	0.344782	0.492188	0.629452	0.759489	0.88762	1.02963	1.20135	1.38775	1.62968	1.93506	2.4362	3.18828	4.17344	5.67286	8.2689	12.5219	17.9446	29.8204	73.3012
0.190219	0.344866	0.492188	0.629566	0.761021	0.887658	1.02984	1.20158	1.39017	1.63086	1.93731	2.4362	3.19428	4.17427	5.67425	8.26898	12.5315	17.9657	29.9325	73.3624
0.190294	0.345114	0.492188	0.629842	0.761673	0.887806	1.02988	1.20158	1.39125	1.63173	1.93731	2.4368	3.19557	4.17476	5.67506	8.30179	12.545	17.9761	29.977	73.5507
0.190619	0.345234	0.492188	0.629949	0.761712	0.887893	1.03002	1.20223	1.39189	1.63499	1.93731	2.43896	3.19922	4.17786	5.67646	8.31456	12.5604	17.9778	30.0325	73.6326
0.190686	0.345401	0.492188	0.630098	0.762953	0.888156	1.03173	1.20283	1.39212	1.6354	1.94001	2.43956	3.19922	4.18359	5.68152	8.32181	12.5839	18.0019	30.0486	73.7633
0.190688	0.345657	0.492188	0.630115	0.764511	0.889181	1.032	1.20314	1.39212	1.63666	1.9423	2.44366	3.20047	4.18359	5.68283	8.32728	12.5975	18.006	30.1264	73.7855
0.190782	0.345909	0.492188	0.630187	0.76512	0.889182	1.03244	1.2058	1.39212	1.63669	1.94624	2.44598	3.2014	4.18359	5.68522	8.32728	12.7043	18.0484	30.2538	74.0022
0.190805	0.346213	0.492188	0.630386	0.765437	0.890049	1.03245	1.20827	1.39212	1.63726	1.94907	2.44725	3.20197	4.18503	5.6976	8.32817	12.7078	18.0804	30.2553	74.2506
0.19084	0.346305	0.492188	0.630435	0.766595	0.890475	1.03266	1.20903	1.39212	1.64064	1.953	2.44728	3.20867	4.1881	5.71683	8.32882	12.7138	18.108	30.2705	75.0259
0.190872	0.346335	0.492188	0.630476	0.76665	0.891349	1.03319	1.20989	1.39212	1.64179	1.95328	2.45794	3.20867	4.18841	5.73824	8.33228	12.737	18.1139	30.2808	75.1783
0.190879	0.346403	0.492188	0.630769	0.766687	0.891497	1.0332	1.21059	1.39212	1.64416	1.95379	2.45806	3.20867	4.19083	5.74329	8.34461	12.741	18.166	30.3432	75.9011
0.190947	0.346693	0.492188	0.63102	0.766832	0.891518	1.03333	1.21156	1.39226	1.64485	1.95392	2.46094	3.20867	4.19083	5.74512	8.37611	12.7613	18.2006	30.3903	75.9218
0.191045	0.347263	0.492188	0.631037	0.767122	0.89155	1.03666	1.212	1.39251	1.64619	1.95484	2.46094	3.20867	4.20303	5.74512	8.38165	12.7812	18.2006	30.3947	76.1604
0.191102	0.347276	0.492188	0.631335	0.767215	0.892284	1.03689	1.21342	1.39263	1.64624	1.95677	2.46094	3.20867	4.20559	5.74651	8.38803	12.8468	18.2046	30.4316	76.2184
0.191117	0.347427	0.492188	0.631387	0.767429	0.892398	1.03722	1.21715	1.39303	1.64683	1.95793	2.46363	3.20867	4.20898	5.75489	8.40444	12.8771	18.2181	30.4411	76.5363
0.191117	0.34745	0.492188	0.631624	0.767451	0.893672	1.03747	1.21883	1.39523	1.64842	1.95831	2.46582	3.20929	4.22098	5.76174	8.40588	12.8831	18.2248	30.4559	76.679
0.19117	0.347567	0.492188	0.631889	0.767526	0.894101	1.03771	1.22296	1.39666	1.65085	1.96143	2.47321	3.21013	4.22947	5.76616	8.44628	12.8841	18.229	30.6657	76.9676
0.191227	0.347701	0.492191	0.631969	0.768434	0.894346	1.03848	1.22458	1.39708	1.65085	1.96171	2.47321	3.21429	4.22947	5.76697	8.46904	12.8885	18.2375	30.8129	77.8488
0.191253	0.347756	0.492285	0.632012	0.768595	0.894346	1.03852	1.22545	1.39723	1.65085	1.96244	2.48008	3.21594	4.2328	5.78168	8.48312	12.8905	18.2588	30.8545	79.7909
0.191605	0.347842	0.492344	0.632077	0.769349	0.894346	1.03895	1.22548	1.39877	1.65085	1.96249	2.48047	3.21801	4.23314	5.78464	8.50004	12.9066	18.263	30.961	79.935
0.191767	0.347876	0.493093	0.632083	0.769434	0.894346	1.04117	1.22603	1.39896	1.65085	1.96269	2.48103	3.22292	4.23358	5.78588	8.52169	12.9072	18.2765	31.0634	83.1819
0.191892	0.347908	0.493354	0.632136	0.769788	0.894346	1.04186	1.22651	1.399	1.65085	1.96327	2.48498	3.23389	4.23396	5.80081	8.53204	12.9555	18.3125	31.0757	83.6907
0.19193	0.348029	0.493385	0.632294	0.769851	0.894961	1.0434	1.2276	1.40317	1.65085	1.96875	2.48635	3.23686	4.24015	5.80517	8.54268	12.977	18.3388	31.1138	84.8795
0.191945	0.348029	0.493402	0.632463	0.770687	0.89536	1.04345	1.22923	1.40334	1.65085	1.96875	2.48823	3.23686	4.24161	5.80802	8.54467	12.9861	18.3402	31.1326	85.6922
0.191978	0.348029	0.493858	0.63271	0.770982	0.895647	1.04377	1.22991	1.40427	1.65318	1.96875	2.48829	3.24051	4.24334	5.83315	8.56038	13.0279	18.3464	31.3091	86.078
0.191987	0.348029	0.494127	0.633145	0.772858	0.895667	1.04393	1.23039	1.40507	1.65425	1.96875	2.49548	3.24176	4.24351	5.83403	8.5656	13.0284	18.3696	31.3422	88.1387
0.192302	0.348029	0.494129	0.634247	0.774195	0.896121	1.04409	1.23047	1.40721	1.65627	1.97076	2.49635	3.24198	4.24824	5.8668	8.59798	13.0466	18.3825	31.3522	89.2564
0.192319	0.348029	0.49427	0.634552	0.774362	0.896429	1.04409	1.23047	1.40942	1.65824	1.9757	2.4965	3.24791	4.25081	5.87025	8.68909	13.097	18.4192	31.5063	91.0297
0.192457	0.348029	0.49439	0.634766	0.774583	0.896559	1.04409	1.23047	1.41041	1.65876	1.97583	2.4985	3.24966	4.25556	5.88702	8.6948	13.1192	18.4396	31.5087	91.1574
0.192724	0.348029	0.49501	0.635686	0.774987	0.896635	1.04517	1.23047	1.41093	1.65988	1.97821	2.50173	3.25233	4.26061	5.90625	8.70073	13.1263	18.4516	31.5371	92.4884
0.192728	0.348029	0.495639	0.635773	0.775044	0.897065	1.04545	1.23047	1.41225	1.66395	1.97924	2.5027	3.25277	4.26328	5.9165	8.70378	13.1291	18.4535	31.6804	93.108
0.192926	0.348029	0.496094	0.635934	0.775563	0.897406	1.0457	1.23047	1.41343	1.66438	1.98407	2.50458	3.25552	4.272	5.91984	8.71138	13.1333	18.4811	31.6993	93.1288
0.193371	0.348029	0.496094	0.636102	0.776554	0.897883	1.04886	1.23047	1.4148	1.66739	1.98407	2.50715	3.25824	4.28195	5.9259	8.71214	13.1409	18.5211	31.7142	95.3285
0.193666	0.348029	0.496094	0.637028	0.777265	0.89797	1.04888	1.23047	1.41486	1.6683	1.98407	2.51145	3.25861	4.29578	5.92672	8.71831	13.142	18.5271	31.7744	98.2805
0.193742	0.348029	0.496094	0.637057	0.777579	0.898928	1.04941	1.23047	1.42084	1.66861	1.98407	2.51497	3.26255	4.2968	5.94712	8.71858	13.1428	18.5356	31.9007	100.876
0.193963	0.348029	0.496094	0.638257	0.778217	0.89966	1.04952	1.23047	1.4209	1.66955	1.98407	2.51641	3.26509	4.29784	5.9573	8.72853	13.1847	18.5503	31.9164	103.148
0.194117	0.348029	0.496094	0.638575	0.778217	0.899709	1.05176	1.23047	1.4216	1.67621	1.98407	2.51963	3.26748	4.29981	5.98016	8.73572	13.2096	18.5878	31.9568	104.816
0.194381	0.348029	0.496326	0.638616	0.778217	0.900935	1.05203	1.23047	1.42511	1.67733	1.98407	2.51978	3.27272	4.30056	5.98411	8.76039	13.2104	18.5894	32.0045	106.862
0.194412	0.348029	0.496338	0.639136	0.778217	0.901414	1.05237	1.23047	1.42544	1.67775	1.9841	2.52038	3.27323	4.30211	5.98608	8.76242	13.2182	18.6035	32.1051	118.371
0.194414	0.348029	0.496373	0.639339	0.778217	0.901735	1.05285	1.23047	1.42562	1.6849	1.98465	2.52553	3.27443	4.30954	5.99593	8.78112	13.2434	18.6234	32.2873	120.094
0.194486	0.348029	0.496862	0.639935	0.778217	0.901753	1.0531	1.2327	1.42679	1.68721	1.98603	2.53255	3.28097	4.30972	5.99681	8.80082	13.2596	18.6376	32.3684	121.082
0.194523	0.348029	0.496926	0.640245	0.778217	0.903646	1.05387	1.23388	1.42694	1.68816	1.98638	2.53353	3.28102	4.31792	6.00133	8.80493	13.267	18.6399	32.4087	123.067
0.194706	0.348029	0.497177	0.640983	0.778217	0.904127	1.0542	1.2347	1.428	1.6913	1.98759	2.53355	3.28132	4.3242	6.0137	8.81881	13.2765	18.7127	32.7322	125.823
0.194739	0.348029	0.497478	0.641004	0.778217	0.905404	1.0551	1.23526	1.42892	1.69497	1.99094	2.53369	3.28163	4.3276	6.01823	8.82883	13.29	18.7674	32.7346
0.195048	0.348029	0.497589	0.641344	0.778217	0.905452	1.05512	1.23689	1.43215	1.6964	1.99447	2.53369	3.2833	4.32801	6.03569	8.86279	13.3119	18.7795	32.8825
0.195121	0.348029	0.497671	0.64135	0.778217	0.905494	1.05536	1.23821	1.43264	1.69666	1.99856	2.53424	3.2833	4.33083	6.05046	8.86774	13.3146	18.7823	32.8929
0.195453	0.348029	0.497873	0.641421	0.778217	0.906214	1.05597	1.23981	1.43287	1.69756	1.99982	2.53531	3.28364	4.33777	6.05507	8.87402	13.3187	18.7937	32.8971
0.195494	0.348029	0.498005	0.641678	0.778217	0.906713	1.05606	1.24011	1.43325	1.69769	2.00041	2.54652	3.28384	4.34441	6.06046	8.88448	13.3209	18.8908	32.938
0.195534	0.348029	0.49823	0.643084	0.778217	0.906731	1.05655	1.24023	1.43349	1.69848	2.00295	2.55173	3.29291	4.34597	6.07529	8.91729	13.3315	18.8973	33.0095
0.195799	0.348029	0.498505	0.64318	0.778217	0.906732	1.05693	1.24023	1.43369	1.69926	2.00419	2.55596	3.2934	4.34613	6.07807	8.93788	13.342	18.9083	33.0566
0.195865	0.348029	0.498955	0.643239	0.778217	0.907787	1.05741	1.24023	1.43402	1.70293	2.00659	2.55624	3.2967	4.35384	6.09299	8.95795	13.3459	18.9108	33.1524
0.196211	0.348029	0.499089	0.643254	0.778217	0.90867	1.0583	1.24081	1.43426	1.703	2.00725	2.5583	3.29826	4.35384	6.09314	8.95795	13.3889	18.9213	33.2294
0.196356	0.348029	0.499496	0.643796	0.778472	0.90877	1.05873	1.24121	1.43496	1.7034	2.00826	2.56038	3.30169	4.36079	6.10228	8.97134	13.3889	18.93	33.2611
0.196414	0.348029	0.499675	0.643892	0.778551	0.908861	1.05877	1.24306	1.43496	1.70424	2.01038	2.56929	3.30567	4.36387	6.10755	8.97434	13.4093	18.9303	33.2803
0.196434	0.348029	0.499915	0.644639	0.779894	0.909759	1.05911	1.24531	1.43496	1.70647	2.01433	2.56929	3.30717	4.36548	6.11284	8.9944	13.4273	18.9359	33.3608
0.19688	0.348029	0.500044	0.645206	0.780249	0.91065	1.06013	1.24688	1.43496	1.70898	2.01495	2.56929	3.30823	4.37612	6.11465	9.01742	13.4279	18.9508	33.3804
0.197124	0.348029	0.500211	0.645263	0.780456	0.910801	1.06084	1.2488	1.43496	1.70976	2.01504	2.56959	3.31085	4.37654	6.11771	9.01985	13.4702	18.9574	33.5451
0.197181	0.348029	0.500366	0.645439	0.780637	0.911211	1.06108	1.24905	1.43547	1.71503	2.01798	2.57057	3.31085	4.38308	6.11938	9.0253	13.471	18.9697	33.6593
0.197598	0.348029	0.500675	0.646331	0.780745	0.912312	1.0611	1.24919	1.43584	1.71602	2.01812	2.58805	3.31085	4.38943	6.12819	9.02866	13.5147	18.9744	33.8227
0.197641	0.348029	0.500858	0.64748	0.781049	0.913024	1.0611	1.2493	1.43636	1.7186	2.02046	2.58969	3.32059	4.39147	6.14842	9.02866	13.5227	18.9829	33.8461
0.197871	0.348029	0.501111	0.647736	0.781327	0.913307	1.06115	1.24938	1.43706	1.71868	2.02152	2.59307	3.32551	4.3954	6.15234	9.03347	13.5318	19.0404	33.8643
0.19795	0.348029	0.501278	0.647844	0.781804	0.913352	1.06127	1.24964	1.43946	1.71887	2.02323	2.59668	3.32819	4.40226	6.15625	9.03614	13.5374	19.0457	33.9592
0.198033	0.348029	0.501321	0.647996	0.782491	0.913907	1.06129	1.24988	1.43995	1.71897	2.02514	2.59778	3.34035	4.40526	6.16134	9.04767	13.5437	19.0611	33.9752
0.198144	0.348029	0.501353	0.64821	0.782572	0.914264	1.06243	1.2499	1.4431	1.72042	2.02636	2.59925	3.34699	4.42192	6.16588	9.04853	13.5695	19.1337	34.0215
0.19834	0.348029	0.501685	0.648272	0.783137	0.914382	1.06498	1.25062	1.44318	1.72346	2.02697	2.60419	3.34724	4.43652	6.16957	9.05718	13.5749	19.1652	34.1884
0.198488	0.348029	0.502178	0.649638	0.783367	0.914692	1.06646	1.25083	1.44378	1.72378	2.02934	2.60604	3.34813	4.43652	6.1701	9.06302	13.591	19.2016	34.2813
0.198544	0.348029	0.502758	0.649837	0.783697	0.914758	1.06688	1.25151	1.44513	1.72666	2.02934	2.60636	3.35113	4.43652	6.17031	9.06435	13.6405	19.2027	34.3504
0.198813	0.348029	0.502884	0.650654	0.784048	0.91531	1.06785	1.25249	1.44526	1.72704	2.03465	2.60954	3.3588	4.4372	6.19593	9.07549	13.6596	19.2032	34.4846
0.198919	0.348029	0.503529	0.650709	0.785504	0.916207	1.07062	1.25438	1.4469	1.72764	2.03469	2.61601	3.364	4.44456	6.19648	9.07883	13.6842	19.2205	34.5584
0.199209	0.348029	0.504065	0.650716	0.785823	0.916317	1.07206	1.25451	1.44701	1.72872	2.03532	2.61601	3.36955	4.44974	6.20252	9.07883	13.6872	19.2291	34.6268
0.199365	0.348029	0.50417	0.650736	0.786002	0.916643	1.07228	1.25469	1.44702	1.72908	2.03828	2.61914	3.3724	4.45104	6.21113	9.09699	13.6888	19.2536	34.7074
0.199388	0.348029	0.504498	0.652096	0.786036	0.917014	1.07283	1.25484	1.44765	1.72926	2.03904	2.61982	3.37467	4.45695	6.24044	9.11083	13.6965	19.3081	34.755
0.199508	0.348029	0.504658	0.652097	0.787062	0.917112	1.07359	1.25484	1.44826	1.73112	2.0435	2.62113	3.38073	4.46423	6.24057	9.12002	13.6977	19.354	34.755
0.199847	0.348029	0.505033	0.652709	0.787178	0.917155	1.07467	1.25484	1.4492	1.7336	2.04638	2.62712	3.38142	4.4674	6.26376	9.15339	13.6984	19.3774	34.7977
0.199885	0.348029	0.50585	0.653492	0.788473	0.917942	1.0749	1.25484	1.44985	1.73657	2.04679	2.63021	3.3823	4.48345	6.27418	9.15456	13.699	19.4424	34.9306
0.199962	0.348029	0.505926	0.654015	0.788712	0.918312	1.0749	1.25484	1.45036	1.74015	2.0478	2.63109	3.38749	4.48421	6.27418	9.16501	13.7087	19.4484	34.9537
0.200093	0.348029	0.506317	0.654202	0.789083	0.918601	1.07628	1.25484	1.45362	1.74015	2.05577	2.65051	3.39099	4.49233	6.27418	9.1771	13.71	19.4781	35.056
0.200139	0.348029	0.506537	0.654786	0.789544	0.919963	1.07717	1.25484	1.45399	1.74015	2.05716	2.653	3.39189	4.50421	6.27418	9.18722	13.7212	19.4958	35.1079
0.200141	0.348029	0.50677	0.65565	0.789566	0.920138	1.07752	1.25484	1.45472	1.74015	2.05745	2.66023	3.39796	4.50544	6.28862	9.20199	13.7263	19.5032	35.2492
0.200214	0.348029	0.506836	0.655707	0.789684	0.920642	1.07852	1.25484	1.45489	1.74015	2.0577	2.66031	3.40045	4.51768	6.29173	9.21721	13.7441	19.5337	35.3357
0.200281	0.348029	0.506918	0.655963	0.789784	0.920919	1.07934	1.25484	1.45578	1.74015	2.05969	2.66191	3.40385	4.52343	6.30275	9.24456	13.7474	19.5421	35.4939
0.200372	0.348029	0.507552	0.656377	0.79038	0.920929	1.08189	1.25484	1.45613	1.74015	2.06143	2.66285	3.40656	4.52438	6.31894	9.24758	13.7475	19.5601	35.5358
0.200453	0.348029	0.50768	0.656974	0.790469	0.921069	1.08228	1.25537	1.45727	1.74015	2.06387	2.66458	3.40667	4.52438	6.33712	9.25491	13.801	19.6012	35.6176
0.20048	0.348029	0.507966	0.657131	0.790614	0.922081	1.0834	1.25569	1.45762	1.74015	2.07542	2.67223	3.4076	4.53452	6.35094	9.26599	13.8036	19.6198	35.6594
0.200516	0.348029	0.50832	0.657318	0.791625	0.922475	1.08343	1.25743	1.45974	1.74015	2.07957	2.67626	3.41736	4.56029	6.35094	9.26626	13.8063	19.63	35.6968
0.200545	0.348029	0.508384	0.657559	0.791896	0.923022	1.08366	1.2575	1.46112	1.74015	2.08042	2.67835	3.41884	4.57368	6.35094	9.27089	13.8064	19.6328	35.7419
0.200643	0.348029	0.508909	0.65802	0.79246	0.924425	1.08409	1.25753	1.46348	1.74015	2.08684	2.68719	3.41994	4.59078	6.35211	9.29988	13.8093	19.6362	35.888
0.20079	0.348029	0.50951	0.658321	0.792599	0.924494	1.08577	1.25796	1.46539	1.74015	2.08787	2.68949	3.42406	4.59364	6.37247	9.31926	13.8164	19.6374	35.9962
0.200871	0.348029	0.510205	0.658378	0.792717	0.924542	1.086	1.25897	1.4657	1.74015	2.08814	2.69028	3.42574	4.60066	6.37423	9.32056	13.8205	19.6389	36.1014
0.201072	0.348029	0.510543	0.658942	0.792718	0.925041	1.08666	1.25918	1.46628	1.74015	2.08817	2.6922	3.42647	4.61884	6.38418	9.32708	13.8361	19.6446	36.2368
0.201111	0.348029	0.510722	0.659055	0.792734	0.925233	1.08704	1.25968	1.46767	1.74015	2.08817	2.69439	3.43788	4.61929	6.39022	9.3343	13.8652	19.7029	36.2368
0.201178	0.348029	0.510762	0.65907	0.792786	0.925236	1.08724	1.25993	1.46853	1.74015	2.08817	2.70019	3.44148	4.62368	6.39431	9.35057	13.8763	19.7481	36.3353
0.201199	0.348029	0.511614	0.65989	0.793262	0.925238	1.0882	1.26051	1.46856	1.74015	2.08817	2.70329	3.4425	4.62368	6.40516	9.36626	13.8885	19.7599	36.362
0.201221	0.348223	0.511842	0.660235	0.793357	0.925529	1.08893	1.26187	1.47081	1.74015	2.08982	2.70703	3.44531	4.62495	6.41734	9.37097	13.9019	19.8018	36.3987
0.201227	0.348335	0.511992	0.660994	0.793561	0.926842	1.08904	1.26297	1.47121	1.74159	2.0913	2.70703	3.44531	4.63225	6.42339	9.37737	13.9212	19.85	36.5091
0.201266	0.348352	0.512676	0.661282	0.793691	0.927504	1.08911	1.26374	1.47144	1.74279	2.09187	2.70784	3.4458	4.63682	6.42748	9.38051	13.9297	19.8765	36.5223
0.201328	0.34841	0.513205	0.661988	0.793828	0.927596	1.08964	1.26412	1.4741	1.7446	2.09385	2.70787	3.44594	4.64102	6.45385	9.38233	13.9383	19.9018	36.585
0.201338	0.348559	0.513652	0.662405	0.794726	0.929733	1.09009	1.26491	1.47522	1.7457	2.0987	2.7089	3.44761	4.65072	6.47341	9.40243	13.9526	19.9392	36.6242
0.20141	0.348568	0.513755	0.662793	0.79474	0.929953	1.09096	1.26529	1.47566	1.74709	2.09923	2.7091	3.45066	4.65109	6.47372	9.42812	13.9536	19.9744	36.6283
0.201464	0.348584	0.513907	0.663078	0.796417	0.930868	1.09173	1.26539	1.47656	1.748	2.10215	2.70981	3.45128	4.65109	6.47716	9.44157	13.9846	19.9829	36.6581
0.201558	0.34868	0.515103	0.663622	0.796832	0.931004	1.09199	1.26821	1.47656	1.74951	2.10263	2.71031	3.45409	4.66038	6.49758	9.44193	13.9906	20.0487	37.0056
0.201621	0.348782	0.515158	0.664207	0.797125	0.931398	1.09204	1.26938	1.47912	1.75169	2.10263	2.7131	3.45409	4.66305	6.50183	9.45551	13.9906	20.0493	37.0827
0.20169	0.348952	0.515239	0.664443	0.797339	0.931493	1.09263	1.27136	1.48182	1.75242	2.10263	2.71819	3.45455	4.66785	6.50698	9.46517	13.991	20.0669	37.1308
0.201713	0.349087	0.516317	0.664546	0.798576	0.93316	1.09351	1.27212	1.48341	1.75396	2.10346	2.71819	3.45905	4.67367	6.5079	9.47065	13.9928	20.1478	37.2123
0.201774	0.34909	0.516508	0.664654	0.798648	0.934295	1.09565	1.27252	1.48425	1.75396	2.10475	2.72019	3.46053	4.68225	6.50846	9.47623	14.0155	20.1857	37.2534
0.201842	0.349287	0.51677	0.664972	0.798794	0.935303	1.09619	1.27356	1.48427	1.75468	2.10797	2.72172	3.46133	4.68225	6.51916	9.48508	14.0295	20.1974	37.2583
0.202009	0.350032	0.517116	0.665053	0.798907	0.935532	1.09716	1.27597	1.4864	1.75546	2.10884	2.72329	3.46464	4.68225	6.52241	9.49281	14.0618	20.2042	37.2614
0.20223	0.350408	0.517222	0.665165	0.799665	0.935649	1.09724	1.27724	1.4879	1.75725	2.10898	2.7257	3.46711	4.68472	6.52699	9.49935	14.1097	20.261	37.3949
0.202339	0.350465	0.517398	0.665214	0.79983	0.935718	1.09734	1.28037	1.49101	1.75905	2.11287	2.73977	3.47008	4.69079	6.52831	9.50344	14.123	20.3179	37.4025
0.20242	0.35079	0.517492	0.66605	0.800382	0.936145	1.09861	1.28071	1.49114	1.75975	2.11545	2.7398	3.47959	4.69183	6.53465	9.5089	14.1516	20.3291	37.474
0.202427	0.350791	0.51754	0.667018	0.800525	0.936451	1.09906	1.2812	1.49287	1.75987	2.11698	2.74418	3.47977	4.70065	6.54074	9.52299	14.1761	20.331	37.5073
0.20258	0.350791	0.517624	0.667296	0.800572	0.936536	1.09912	1.28267	1.493	1.76115	2.11698	2.74705	3.48029	4.70161	6.54092	9.52375	14.1819	20.3398	37.5404
0.202737	0.350791	0.517812	0.667381	0.801612	0.937535	1.10001	1.28434	1.49354	1.76216	2.11698	2.7507	3.48029	4.70161	6.55065	9.54161	14.1956	20.3471	37.6169
0.202942	0.350791	0.518175	0.667494	0.801763	0.937674	1.10039	1.28474	1.49363	1.76262	2.11698	2.75141	3.48029	4.70161	6.5513	9.54383	14.1969	20.3489	37.6648
0.203241	0.350791	0.518847	0.667508	0.801797	0.93879	1.10048	1.28577	1.49693	1.76349	2.11698	2.75141	3.48029	4.70161	6.55275	9.54532	14.2005	20.3836	37.8185
0.20349	0.350791	0.519002	0.668097	0.801894	0.939507	1.10056	1.28735	1.49748	1.76365	2.12095	2.75141	3.48029	4.70571	6.57364	9.54723	14.2107	20.3946	37.8546
0.203535	0.350791	0.519009	0.668271	0.802513	0.940515	1.10056	1.28884	1.49951	1.76552	2.12337	2.75141	3.49029	4.7101	6.58205	9.55208	14.2451	20.3971	37.8841
0.203645	0.350791	0.519128	0.669067	0.803357	0.942199	1.10056	1.29057	1.49954	1.7668	2.12353	2.75211	3.49265	4.71064	6.59064	9.55579	14.2569	20.4384	38.0229
0.203686	0.350791	0.519221	0.669711	0.803629	0.943016	1.10056	1.29157	1.50007	1.76908	2.12492	2.75552	3.49366	4.71375	6.60254	9.55655	14.2586	20.4391	38.2492
0.203783	0.350791	0.520406	0.670108	0.804228	0.943371	1.10056	1.29185	1.50025	1.76989	2.12776	2.75711	3.49765	4.71394	6.62287	9.55822	14.2669	20.4668	38.2693
0.203801	0.350916	0.520683	0.670877	0.804325	0.944849	1.10056	1.2919	1.5015	1.77021	2.13133	2.7642	3.49765	4.71562	6.62628	9.57166	14.2689	20.4672	38.2869
0.20387	0.351091	0.520804	0.671492	0.804631	0.945372	1.10056	1.29393	1.50303	1.77105	2.132	2.7659	3.50538	4.71843	6.6275	9.57463	14.2862	20.4674	38.3022
0.204332	0.351384	0.520926	0.67161	0.805093	0.947839	1.10056	1.29401	1.50315	1.77156	2.13508	2.78125	3.50802	4.72517	6.63299	9.59353	14.29	20.4688	38.3053
0.204347	0.351858	0.521134	0.671767	0.805099	0.948001	1.10056	1.29415	1.50469	1.77168	2.13571	2.78423	3.51122	4.72575	6.64111	9.59447	14.2925	20.4866	38.3125
0.204466	0.352079	0.521163	0.672167	0.805228	0.948128	1.10056	1.2943	1.50585	1.77246	2.13616	2.78423	3.51401	4.72586	6.6438	9.59766	14.3348	20.4902	38.3351
0.204576	0.352988	0.521301	0.672276	0.805597	0.950057	1.10056	1.29448	1.50652	1.7731	2.13775	2.78651	3.51521	4.72596	6.64526	9.60907	14.3348	20.529	38.5182
0.204586	0.352998	0.521398	0.672415	0.80606	0.950304	1.10056	1.29455	1.50697	1.77461	2.1417	2.79375	3.51676	4.72731	6.64609	9.60977	14.3516	20.5939	38.5719
0.204599	0.353157	0.521644	0.673511	0.80613	0.950842	1.10056	1.29483	1.509	1.77461	2.14196	2.79398	3.52353	4.72903	6.64726	9.61027	14.3525	20.5988	38.7314
0.204624	0.353453	0.522295	0.673521	0.807596	0.951294	1.10056	1.29486	1.51242	1.77461	2.15001	2.79651	3.52353	4.73174	6.64827	9.61027	14.3568	20.6692	38.7424
0.204632	0.353894	0.522634	0.674299	0.808487	0.951709	1.10129	1.29564	1.51244	1.77461	2.15219	2.79673	3.52353	4.73371	6.64909	9.63286	14.3946	20.726	38.7439
0.204779	0.354035	0.52278	0.67667	0.808708	0.952757	1.10135	1.29718	1.51423	1.77461	2.15229	2.8006	3.52353	4.73371	6.65183	9.648	14.4752	20.8136	38.8859
0.204893	0.354079	0.523077	0.676732	0.809316	0.953472	1.1021	1.29746	1.51469	1.77461	2.15573	2.80155	3.53532	4.75286	6.65546	9.65108	14.4806	20.8298	39.0232
0.204959	0.354277	0.523254	0.677119	0.809323	0.95362	1.10369	1.29781	1.51505	1.77461	2.16711	2.8059	3.53738	4.76765	6.68075	9.67719	14.5071	20.8635	39.0656
0.205262	0.354376	0.523324	0.677728	0.809649	0.95429	1.10482	1.29817	1.51522	1.77461	2.18156	2.8059	3.53754	4.77328	6.68238	9.67985	14.5072	20.8764	39.1471
0.205344	0.354478	0.523477	0.677764	0.810601	0.954372	1.11092	1.30036	1.5171	1.77489	2.18353	2.8059	3.54262	4.77828	6.69447	9.68315	14.5275	20.8795	39.1807
0.205424	0.354866	0.523722	0.67808	0.810934	0.955038	1.11095	1.30044	1.52002	1.77606	2.18388	2.8059	3.5468	4.78604	6.69998	9.68601	14.5488	20.9079	39.2379
0.20546	0.355053	0.524097	0.678244	0.811035	0.955228	1.11229	1.30174	1.52203	1.77649	2.18651	2.8059	3.55149	4.78956	6.70067	9.6894	14.5529	20.9194	39.3879
0.205469	0.355129	0.524612	0.678336	0.811669	0.955589	1.11249	1.30233	1.52514	1.77892	2.18772	2.8059	3.55201	4.79524	6.71705	9.6979	14.5701	20.9376	39.434
0.205494	0.35527	0.524674	0.678413	0.812178	0.95598	1.11318	1.30434	1.52749	1.77966	2.18956	2.80661	3.55335	4.81488	6.71705	9.70062	14.5919	20.9606	39.5328
0.205507	0.355429	0.525027	0.67915	0.812751	0.956819	1.11392	1.30439	1.53108	1.78095	2.19015	2.81144	3.56067	4.81898	6.72133	9.71144	14.6338	20.9888	39.5387
0.205585	0.355583	0.525399	0.679293	0.812961	0.957646	1.11409	1.30493	1.53255	1.78469	2.19257	2.81179	3.56352	4.8345	6.72156	9.72445	14.6582	21.0256	39.5737
0.205619	0.355777	0.525942	0.679332	0.814011	0.957758	1.11467	1.30538	1.53415	1.78544	2.19263	2.8118	3.5788	4.8381	6.73034	9.72485	14.6592	21.0325	39.6022
0.205686	0.355905	0.526335	0.679414	0.814269	0.957934	1.1154	1.30661	1.53418	1.78634	2.19469	2.81346	3.58037	4.84412	6.73412	9.73549	14.671	21.054	39.6075
0.205706	0.35602	0.52648	0.679664	0.814343	0.959587	1.11585	1.30701	1.53522	1.78869	2.19599	2.81384	3.58178	4.84529	6.7575	9.73854	14.6874	21.1109	39.6203
0.205808	0.356061	0.52696	0.680274	0.814443	0.959808	1.1175	1.30701	1.53564	1.78869	2.20113	2.81485	3.58266	4.84748	6.76854	9.74407	14.7101	21.1941	39.6203
0.20596	0.356533	0.527307	0.680408	0.814956	0.961681	1.11775	1.30752	1.53581	1.78869	2.20113	2.82172	3.58318	4.84769	6.79376	9.75103	14.7146	21.2213	39.6326
0.206099	0.357034	0.527597	0.680562	0.816136	0.961858	1.11827	1.30827	1.5377	1.79109	2.20113	2.82292	3.58318	4.85373	6.80657	9.76097	14.7315	21.2497	39.6326
0.206144	0.357056	0.528186	0.68072	0.816635	0.961934	1.11894	1.30839	1.53813	1.79159	2.20147	2.82421	3.58467	4.86076	6.80662	9.76964	14.7403	21.2853	39.6573
0.206476	0.357125	0.528953	0.680996	0.817125	0.964973	1.11913	1.30952	1.53982	1.79159	2.20446	2.82535	3.5912	4.86809	6.80835	9.77701	14.7533	21.3058	39.6684
0.206698	0.357243	0.529175	0.681278	0.817286	0.965197	1.11925	1.31112	1.54041	1.79159	2.20647	2.82984	3.59263	4.87925	6.81903	9.78045	14.7598	21.3588	39.6945
0.206717	0.35771	0.529241	0.681361	0.818002	0.965445	1.12329	1.31237	1.54127	1.79159	2.20806	2.83911	3.60045	4.88482	6.83765	9.78166	14.7676	21.4063	39.6956
0.206772	0.357715	0.529251	0.681591	0.818274	0.966627	1.12487	1.31238	1.54314	1.79159	2.2099	2.83954	3.61192	4.88657	6.85538	9.7934	14.7923	21.4334	39.7036
0.20681	0.357858	0.529367	0.682002	0.818316	0.966629	1.12666	1.31424	1.54476	1.79159	2.21888	2.84026	3.62082	4.89868	6.85622	9.80059	14.7931	21.5121	39.7577
0.206899	0.357904	0.529826	0.682343	0.818438	0.966671	1.12676	1.31435	1.54487	1.79159	2.21967	2.84077	3.62378	4.90131	6.86207	9.80059	14.8027	21.5134	39.7874
0.20705	0.358152	0.52989	0.682373	0.819563	0.967839	1.12698	1.31525	1.54563	1.79174	2.21975	2.84359	3.6246	4.90721	6.8635	9.80553	14.809	21.5221	39.8191
0.207135	0.358547	0.529975	0.6831	0.819679	0.967891	1.12717	1.31709	1.54725	1.79212	2.21999	2.84679	3.6254	4.90959	6.87492	9.80791	14.8165	21.5412	39.9216
0.207721	0.358702	0.530004	0.683453	0.819775	0.969009	1.1278	1.31752	1.54911	1.79236	2.22291	2.85351	3.62788	4.91783	6.8785	9.82198	14.8277	21.6319	39.9324
0.207979	0.358935	0.530059	0.683499	0.820496	0.969395	1.12891	1.3182	1.55159	1.7933	2.22366	2.85696	3.63353	4.92438	6.89681	9.83381	14.8296	21.7077	39.9698
0.208029	0.359625	0.530504	0.68369	0.820524	0.969487	1.12896	1.31868	1.55254	1.79348	2.22477	2.86561	3.63353	4.92802	6.90818	9.83428	14.8484	21.7078	40.0206
0.208167	0.360134	0.530513	0.683691	0.820776	0.970071	1.12923	1.31987	1.55305	1.79604	2.22494	2.86992	3.63353	4.93695	6.91065	9.87398	14.8601	21.7261	40.0439
0.208292	0.360138	0.531146	0.68395	0.823079	0.971166	1.12941	1.32024	1.55503	1.79619	2.22555	2.86992	3.63555	4.94425	6.91148	9.89324	14.8772	21.7318	40.1977
0.208458	0.360262	0.531306	0.684545	0.823736	0.971872	1.12957	1.32112	1.55643	1.79963	2.22847	2.86992	3.63937	4.94642	6.91308	9.90814	14.8966	21.7381	40.261
0.208492	0.360412	0.531396	0.68469	0.823776	0.972092	1.12984	1.32124	1.55643	1.80156	2.22847	2.86992	3.64102	4.95254	6.91468	9.92036	14.9336	21.7543	40.3413
0.20851	0.360439	0.531464	0.685017	0.823831	0.972587	1.13044	1.32158	1.55643	1.80619	2.22847	2.86992	3.6492	4.95254	6.92025	9.92483	14.967	21.8026	40.3774
0.208689	0.360517	0.531911	0.685075	0.823899	0.972595	1.13058	1.32218	1.55643	1.80624	2.2286	2.86992	3.65274	4.96326	6.92379	9.95739	14.9732	21.8659	40.6472
0.208773	0.360586	0.531998	0.68519	0.8239	0.972755	1.13107	1.32324	1.55643	1.80669	2.23229	2.87743	3.65447	4.9826	6.93443	9.99335	14.9799	21.8837	40.6683
0.208799	0.360723	0.532033	0.685549	0.824929	0.97321	1.13145	1.32415	1.55643	1.80861	2.23604	2.8789	3.65845	4.98302	6.93716	9.99335	15.0072	21.9148	40.7318
0.208932	0.360727	0.532314	0.685658	0.825103	0.973328	1.13179	1.32499	1.55643	1.80897	2.23725	2.88208	3.65845	4.98302	6.95936	10.0064	15.0101	21.9383	40.8856
0.209123	0.360853	0.532382	0.685988	0.825286	0.974201	1.13205	1.32526	1.55643	1.80917	2.23753	2.88221	3.6706	4.98849	6.96468	10.0131	15.0137	21.9436	40.9548
0.20914	0.361045	0.532781	0.686165	0.825639	0.974652	1.13273	1.32526	1.55749	1.80952	2.24017	2.88766	3.67461	5.00126	6.96928	10.032	15.0198	21.9504	41.0003
0.209168	0.361721	0.532993	0.686263	0.826888	0.974693	1.1335	1.32526	1.55969	1.81191	2.24616	2.88796	3.68362	5.01075	6.98756	10.0387	15.0299	22.0455	41.0166
0.20937	0.362168	0.533138	0.686267	0.826943	0.974741	1.13417	1.32526	1.56007	1.81539	2.24622	2.88864	3.68754	5.01102	6.99144	10.0512	15.0299	22.0497	41.0257
0.209392	0.362461	0.533513	0.686434	0.827178	0.974845	1.13495	1.32526	1.56247	1.81695	2.24807	2.88901	3.68829	5.03421	6.9953	10.0683	15.0299	22.0839	41.0603
0.209446	0.362616	0.533807	0.687442	0.827249	0.976856	1.13508	1.32526	1.56294	1.82131	2.24813	2.89179	3.69126	5.0401	7.0139	10.0697	15.0527	22.1017	41.0794
0.209671	0.362684	0.53387	0.68772	0.828575	0.976941	1.13552	1.32526	1.56496	1.823	2.25139	2.89341	3.6996	5.04494	7.0163	10.072	15.0885	22.1114	41.1385
0.209723	0.363393	0.534044	0.687758	0.828829	0.977007	1.1372	1.32526	1.56942	1.82491	2.25349	2.89561	3.6996	5.04942	7.03148	10.0802	15.098	22.1475	41.1442
0.209723	0.363446	0.53523	0.688835	0.829103	0.977214	1.13744	1.32526	1.57034	1.82726	2.25699	2.89919	3.6996	5.05812	7.03845	10.0898	15.131	22.1484	41.186
0.209724	0.363532	0.535585	0.690676	0.829771	0.977615	1.13829	1.32526	1.57088	1.82847	2.25799	2.90025	3.70057	5.05884	7.03911	10.1018	15.1313	22.1783	41.2146
0.210208	0.36398	0.53621	0.691224	0.82979	0.979469	1.13898	1.32544	1.5716	1.83342	2.26184	2.90112	3.70182	5.06355	7.0408	10.1026	15.1315	22.1956	41.2534
0.210485	0.364175	0.536469	0.691382	0.830331	0.979555	1.14062	1.3258	1.57188	1.83856	2.26343	2.90372	3.70597	5.06738	7.04275	10.1168	15.1403	22.2069	41.272
0.210551	0.364446	0.536556	0.691639	0.830458	0.979745	1.14154	1.32709	1.57286	1.84122	2.26385	2.90516	3.70629	5.06738	7.05426	10.1374	15.1483	22.2331	41.4673
0.210598	0.364475	0.536696	0.691804	0.831563	0.979748	1.1426	1.32962	1.57469	1.84361	2.26835	2.90709	3.70722	5.06962	7.06533	10.1467	15.1551	22.2425	41.5577
0.210598	0.364563	0.536755	0.692199	0.831924	0.980261	1.14333	1.33019	1.57577	1.84446	2.26887	2.92221	3.70801	5.0725	7.07716	10.1467	15.245	22.3013	41.651
0.210678	0.36458	0.536813	0.692218	0.831963	0.980748	1.14417	1.33422	1.57577	1.84624	2.26887	2.92268	3.71488	5.07335	7.07749	10.1646	15.299	22.3305	41.6903
0.21084	0.364724	0.53692	0.692628	0.8322	0.980978	1.14585	1.33533	1.57577	1.85016	2.26887	2.927	3.72647	5.07335	7.07761	10.1916	15.3181	22.3336	41.7217
0.210961	0.364809	0.537095	0.693288	0.832257	0.981627	1.14632	1.33533	1.57577	1.85228	2.26887	2.92912	3.7281	5.07335	7.10621	10.2005	15.3318	22.5035	41.9083
0.21098	0.364816	0.537472	0.693602	0.832678	0.983114	1.14694	1.33555	1.57577	1.85288	2.26887	2.93691	3.73048	5.07641	7.10761	10.2071	15.3492	22.5511	41.9828
0.211018	0.36656	0.537858	0.69375	0.832782	0.983164	1.14698	1.33572	1.57577	1.85361	2.26887	2.94963	3.74839	5.08778	7.11128	10.2124	15.416	22.5553	42.0891
0.211133	0.367037	0.538139	0.693915	0.832819	0.983727	1.14765	1.33604	1.57577	1.85659	2.26887	2.95102	3.74839	5.08978	7.14096	10.214	15.4565	22.5807	42.1281
0.211249	0.367273	0.53856	0.694596	0.834239	0.984093	1.14954	1.33611	1.57577	1.85948	2.26887	2.95312	3.75698	5.09016	7.14173	10.2505	15.5018	22.5836	42.2856
0.211794	0.36744	0.539026	0.695582	0.834361	0.984375	1.15006	1.33817	1.57577	1.86247	2.27473	2.95312	3.75805	5.09169	7.14327	10.2745	15.5156	22.5991	42.346
0.211897	0.367758	0.539057	0.696058	0.834828	0.984375	1.15243	1.33822	1.57577	1.86392	2.2778	2.95325	3.75818	5.10679	7.14778	10.2795	15.5293	22.658	42.3517
0.211934	0.367788	0.539165	0.696058	0.83483	0.984375	1.15386	1.34147	1.57577	1.86394	2.27782	2.95356	3.7704	5.14693	7.15367	10.3001	15.5351	22.672	42.5109
0.211961	0.368415	0.539264	0.696058	0.834924	0.984375	1.15704	1.34191	1.57577	1.86557	2.28081	2.95406	3.77317	5.16797	7.15367	10.3009	15.5493	22.6887	42.5377
0.21207	0.368677	0.539499	0.696058	0.835384	0.984375	1.1571	1.34241	1.57658	1.86642	2.28215	2.95971	3.78277	5.16797	7.16636	10.3045	15.5622	22.6942	42.5695
0.212215	0.368772	0.540138	0.696058	0.835857	0.984375	1.15732	1.34382	1.5771	1.86704	2.28488	2.96336	3.78692	5.17114	7.16697	10.3091	15.5635	22.715	42.6297
0.212316	0.368848	0.54033	0.696058	0.838025	0.984375	1.15751	1.3439	1.57768	1.86742	2.28644	2.96336	3.79359	5.19135	7.20429	10.3115	15.5637	22.7182	42.6943
0.212333	0.369139	0.540449	0.696058	0.838275	0.985159	1.15752	1.34391	1.58195	1.87048	2.28826	2.96336	3.80535	5.19694	7.20765	10.3301	15.5741	22.7261	42.6994
0.212358	0.369351	0.541664	0.696058	0.83848	0.986078	1.15952	1.34449	1.58423	1.87293	2.28834	2.96336	3.81574	5.19798	7.23546	10.3367	15.5842	22.733	42.7138
0.212381	0.369806	0.541911	0.696058	0.838903	0.986366	1.15963	1.34538	1.58497	1.87325	2.29544	2.96337	3.81699	5.21224	7.23825	10.3623	15.5919	22.774	42.7683
0.212456	0.369843	0.543153	0.696058	0.83976	0.986678	1.16035	1.34574	1.58539	1.87419	2.29566	2.96667	3.81893	5.21463	7.26706	10.4188	15.597	22.7824	42.8056
0.212459	0.369971	0.543432	0.696058	0.841154	0.989723	1.16138	1.34621	1.58753	1.87419	2.29872	2.97356	3.82566	5.21463	7.27123	10.4383	15.6278	22.8015	42.8083
0.212476	0.369985	0.543476	0.696058	0.841162	0.989945	1.16318	1.34793	1.58827	1.87469	2.29897	2.97356	3.82832	5.21473	7.27453	10.4523	15.6469	22.8496	42.8203
0.212543	0.370053	0.543547	0.696058	0.841998	0.990221	1.16353	1.34849	1.58827	1.87597	2.30039	2.97356	3.83366	5.21475	7.28415	10.4554	15.6552	22.8574	42.8357
0.21272	0.370118	0.544101	0.696058	0.842463	0.991084	1.16485	1.34853	1.58827	1.87651	2.30432	2.97371	3.83564	5.21573	7.31689	10.4698	15.703	22.8589	43.0309
0.212913	0.370214	0.544416	0.696058	0.842586	0.99134	1.16494	1.34869	1.58827	1.8768	2.30795	2.974	3.83869	5.21857	7.32334	10.4789	15.7237	22.888	43.0688
0.213014	0.370637	0.544502	0.696427	0.843027	0.991342	1.16496	1.3491	1.58827	1.88402	2.31643	2.97429	3.84037	5.21877	7.34168	10.4963	15.73	22.8938	43.161
0.213137	0.370701	0.544543	0.696707	0.843314	0.991983	1.16501	1.34927	1.58827	1.88589	2.31769	2.97633	3.84058	5.22044	7.34168	10.5288	15.7359	22.9018	43.1928
0.213266	0.371242	0.544839	0.696853	0.843374	0.992711	1.16705	1.34969	1.58867	1.88905	2.31951	2.97903	3.84411	5.22085	7.34168	10.5368	15.7368	22.9173	43.2756
0.213364	0.371489	0.544911	0.69722	0.843751	0.993198	1.16748	1.35106	1.59083	1.88962	2.32067	2.98273	3.84411	5.22367	7.34168	10.543	15.7519	22.9198	43.3328
0.213492	0.371534	0.545232	0.697484	0.844061	0.993403	1.16869	1.35134	1.59099	1.8913	2.32164	2.98513	3.84478	5.22481	7.34264	10.5766	15.7526	22.9237	43.3422
0.213718	0.371777	0.545365	0.697869	0.844559	0.99346	1.16928	1.3534	1.59234	1.89242	2.32164	2.98518	3.85821	5.22625	7.34999	10.5795	15.7643	22.9375	43.3551
0.213734	0.371855	0.545455	0.698052	0.845095	0.993568	1.17035	1.35387	1.59369	1.89352	2.32164	2.98688	3.86462	5.23073	7.35724	10.5877	15.7882	22.9555	43.3724
0.213773	0.371999	0.546004	0.698604	0.845103	0.993839	1.17186	1.35428	1.59449	1.89449	2.3232	2.98688	3.86898	5.23202	7.37364	10.5899	15.8016	23.026	43.4305
0.213888	0.372099	0.546059	0.699297	0.845317	0.994746	1.17191	1.35599	1.59611	1.89476	2.32351	2.98813	3.87193	5.23202	7.38281	10.6093	15.8054	23.0322	43.5106
0.214004	0.372214	0.546174	0.699397	0.846184	0.994823	1.17221	1.35617	1.59693	1.89537	2.32373	2.9889	3.87949	5.24723	7.38281	10.6137	15.8066	23.0534	43.5475
0.21424	0.372276	0.546397	0.699601	0.847424	0.997701	1.17268	1.35684	1.59929	1.89674	2.32607	2.99386	3.88147	5.2512	7.38691	10.6163	15.8092	23.0768	43.5475
0.214284	0.372379	0.546528	0.699743	0.847442	0.998241	1.17501	1.3578	1.59932	1.89706	2.32718	2.99386	3.88255	5.26664	7.39226	10.6252	15.8247	23.1384	43.6197
0.214312	0.372445	0.546579	0.701053	0.847831	0.998459	1.1756	1.35875	1.60022	1.90063	2.32769	2.99386	3.88936	5.26664	7.40219	10.6299	15.8363	23.1686	43.7667
0.214411	0.372542	0.546784	0.701105	0.848689	0.998706	1.17676	1.35877	1.60185	1.90374	2.33146	2.99428	3.89108	5.26961	7.41573	10.6845	15.8583	23.1729	43.9041
0.214411	0.373287	0.546828	0.701583	0.848844	0.999495	1.17689	1.35981	1.60283	1.90456	2.33465	2.99724	3.90843	5.2719	7.42079	10.6943	15.8592	23.1947	43.915
0.214438	0.373728	0.547092	0.701583	0.849119	1.00003	1.17733	1.36234	1.60367	1.90675	2.33465	2.99877	3.91715	5.27272	7.44815	10.7955	15.8662	23.223	44.0315
0.214448	0.373769	0.547205	0.702084	0.849233	1.00019	1.18148	1.36295	1.60432	1.90996	2.33465	3.00396	3.92353	5.27343	7.45982	10.8057	15.8707	23.2275	44.147
0.214668	0.373785	0.547494	0.702812	0.849404	1.00103	1.18167	1.36327	1.60483	1.9118	2.33694	3.00396	3.92928	5.27673	7.47032	10.8068	15.8779	23.2286	44.1586
0.215014	0.373816	0.547795	0.702922	0.851377	1.00168	1.18174	1.36438	1.60563	1.91338	2.33697	3.00396	3.93191	5.28358	7.48354	10.8276	15.8878	23.253	44.1606
0.215283	0.37385	0.547887	0.703206	0.851628	1.00197	1.18257	1.36629	1.61364	1.91349	2.33838	3.01206	3.93369	5.30102	7.48465	10.8309	15.9248	23.3097	44.3088
0.215313	0.374028	0.547982	0.703244	0.852007	1.00204	1.1827	1.36696	1.61408	1.9183	2.33896	3.0156	3.9375	5.30195	7.48465	10.8351	16.0037	23.3205	44.3204
0.215343	0.374301	0.548105	0.70368	0.852317	1.00205	1.18308	1.36804	1.61499	1.91869	2.34428	3.01762	3.94358	5.30262	7.48465	10.8549	16.0078	23.4152	44.335
0.215505	0.374319	0.548122	0.703857	0.8528	1.00256	1.18321	1.36883	1.61538	1.92032	2.34878	3.0231	3.94518	5.30279	7.48474	10.8632	16.0082	23.4836	44.3685
0.215678	0.374347	0.54887	0.704082	0.852839	1.00275	1.18356	1.36901	1.61777	1.92043	2.35245	3.02365	3.94591	5.30943	7.49478	10.8775	16.0097	23.5081	44.4632
0.215756	0.374504	0.549498	0.704548	0.853388	1.0032	1.18428	1.37	1.61914	1.92162	2.35658	3.02392	3.94809	5.31163	7.49678	11.0036	16.0102	23.5082	44.464
0.215798	0.374589	0.549837	0.705245	0.853544	1.00331	1.1856	1.37009	1.62178	1.92205	2.36957	3.037	3.96242	5.32346	7.50081	11.0634	16.0152	23.5822	44.5182
0.215825	0.374805	0.55009	0.705383	0.853577	1.00361	1.18706	1.37055	1.62199	1.92205	2.37193	3.03815	3.96461	5.32382	7.50188	11.0742	16.0187	23.6322	44.5735
0.215827	0.374844	0.550282	0.706221	0.853616	1.00551	1.18707	1.37144	1.62266	1.92205	2.3777	3.03919	3.96468	5.32579	7.50687	11.0771	16.0201	23.6364	44.5988
0.215847	0.374966	0.550282	0.706312	0.854749	1.00583	1.18725	1.37352	1.62383	1.92205	2.38223	3.04401	3.9652	5.32579	7.50832	11.091	16.0216	23.645	44.6925
0.216073	0.375259	0.550282	0.706974	0.855414	1.00625	1.18818	1.37502	1.6246	1.92361	2.38593	3.04726	3.96692	5.33582	7.51265	11.1206	16.032	23.6759	44.6993
0.21639	0.375528	0.550282	0.707054	0.855738	1.0073	1.18865	1.3755	1.62555	1.92525	2.38842	3.05233	3.96814	5.34597	7.51292	11.1424	16.0378	23.6762	44.8602
0.216726	0.375577	0.550282	0.707953	0.855849	1.00744	1.18884	1.37676	1.62725	1.92557	2.38882	3.05598	3.96814	5.36205	7.5156	11.1496	16.0498	23.6856	44.9052
0.216781	0.37599	0.550282	0.708297	0.856778	1.00777	1.19032	1.37762	1.62803	1.92619	2.39605	3.06035	3.97118	5.36571	7.53304	11.1509	16.052	23.7475	44.9405
0.216823	0.376183	0.550282	0.708672	0.857149	1.00777	1.19098	1.37828	1.63023	1.9287	2.39823	3.0607	3.97332	5.39726	7.53587	11.1601	16.0527	23.7859	45.0056
0.216841	0.376409	0.550282	0.708719	0.857925	1.00789	1.19123	1.38024	1.63095	1.93354	2.4027	3.06081	3.97577	5.39726	7.53773	11.1953	16.0615	23.9012	45.0378
0.216871	0.3767	0.550282	0.709474	0.858413	1.00833	1.19348	1.38073	1.63096	1.93519	2.40632	3.07007	3.97577	5.40286	7.54162	11.2236	16.1044	24.0092	45.0412
0.216931	0.376924	0.550282	0.70955	0.858842	1.00842	1.19358	1.3817	1.63145	1.93539	2.41242	3.07628	3.97577	5.41138	7.5733	11.2287	16.1095	24.0368	45.0567
0.217374	0.376962	0.550282	0.709634	0.858861	1.01039	1.19389	1.38187	1.63167	1.93731	2.41432	3.0807	3.97649	5.41965	7.58628	11.2344	16.1128	24.0451	45.1372
0.217907	0.377104	0.550282	0.7102	0.860695	1.01072	1.19396	1.38274	1.63339	1.9381	2.42374	3.08323	3.98549	5.41965	7.5957	11.2501	16.1243	24.0531	45.2418
0.217971	0.377151	0.550282	0.710341	0.860767	1.01385	1.19513	1.38302	1.63355	1.93936	2.42374	3.08355	3.98869	5.42189	7.61968	11.2588	16.1368	24.0605	45.3057
0.217972	0.377326	0.550282	0.710613	0.861203	1.01417	1.19569	1.38409	1.63363	1.94022	2.42588	3.0861	3.99369	5.43272	7.6262	11.2721	16.1417	24.0801	45.3296
0.217996	0.378373	0.550282	0.711214	0.862404	1.01418	1.19665	1.38716	1.63421	1.94479	2.42724	3.09322	4.00035	5.43639	7.6408	11.2842	16.1913	24.1037	45.4161
0.218072	0.378526	0.550282	0.711706	0.862713	1.01431	1.1972	1.38716	1.63436	1.94557	2.42934	3.09342	4.00612	5.44949	7.67755	11.2867	16.2085	24.1239	45.538
0.218086	0.378976	0.550282	0.711912	0.863107	1.01467	1.19729	1.38838	1.63447	1.94784	2.43099	3.094	4.00732	5.45983	7.72966	11.2935	16.2256	24.1455	45.5639
0.218126	0.379089	0.550282	0.711944	0.863784	1.01467	1.19898	1.38928	1.63681	1.94821	2.43275	3.09523	4.00811	5.46269	7.73481	11.2968	16.2291	24.151	45.6661
0.218132	0.379409	0.550282	0.713225	0.863803	1.01467	1.1991	1.39025	1.63693	1.95461	2.43408	3.09823	4.01185	5.46417	7.78217	11.323	16.2634	24.2068	45.6972
0.218235	0.380072	0.550282	0.713507	0.864187	1.01467	1.19977	1.39145	1.63769	1.95486	2.4362	3.10613	4.01407	5.46417	7.78217	11.328	16.302	24.2382	45.7615
0.218435	0.380246	0.550282	0.71364	0.864275	1.01467	1.19983	1.39212	1.639	1.95577	2.43904	3.10802	4.01832	5.46587	7.78526	11.3329	16.3053	24.2559	45.8146
0.218536	0.380533	0.550282	0.713794	0.864642	1.01467	1.20014	1.39212	1.63938	1.95598	2.44039	3.11142	4.03053	5.47035	7.78702	11.3364	16.3093	24.2686	45.8693
0.218795	0.380548	0.550282	0.714043	0.864679	1.01467	1.20093	1.39212	1.64186	1.95617	2.44332	3.11143	4.03286	5.47084	7.80561	11.3385	16.3129	24.2868	45.9798
0.218797	0.380622	0.550282	0.714142	0.864761	1.01467	1.20213	1.39212	1.6431	1.95637	2.44528	3.11167	4.03855	5.47261	7.81177	11.3601	16.3206	24.2885	46.0202
0.21891	0.38093	0.550282	0.71546	0.864846	1.01467	1.20268	1.39212	1.64381	1.95804	2.44629	3.1134	4.04035	5.4737	7.81711	11.3611	16.3312	24.3247	46.2966
0.218926	0.381405	0.550282	0.716006	0.864917	1.01467	1.2049	1.39261	1.64916	1.96121	2.44893	3.11402	4.04153	5.47472	7.82098	11.3748	16.3788	24.3445	46.329
0.219066	0.381506	0.550282	0.716101	0.865031	1.01467	1.20521	1.39277	1.65085	1.96142	2.44931	3.12022	4.04216	5.4829	7.83259	11.3792	16.4227	24.362	46.4177
0.219072	0.38173	0.550282	0.716329	0.86719	1.01467	1.2069	1.39389	1.65085	1.96186	2.45097	3.12333	4.05845	5.48428	7.84792	11.384	16.424	24.3745	46.4433
0.219232	0.381832	0.550282	0.716436	0.868201	1.01467	1.20703	1.39403	1.65085	1.96778	2.45198	3.12468	4.06443	5.49834	7.84804	11.3908	16.4497	24.376	46.4642
0.21938	0.381921	0.550282	0.716456	0.869196	1.01523	1.20733	1.3942	1.65085	1.96842	2.45451	3.12601	4.07053	5.50282	7.87414	11.3911	16.4523	24.4645	46.47
0.219446	0.381924	0.550282	0.718091	0.869576	1.01551	1.20771	1.3952	1.6514	1.96875	2.45554	3.12709	4.07108	5.50282	7.89616	11.4189	16.4819	24.5416	46.4812
0.219563	0.381979	0.550282	0.718959	0.870696	1.0156	1.20931	1.39607	1.656	1.97862	2.46094	3.13226	4.07493	5.51026	7.92346	11.4189	16.4901	24.5516	46.5099
0.219747	0.382055	0.550282	0.720001	0.870733	1.01661	1.20981	1.3962	1.66042	1.97999	2.4651	3.13226	4.0775	5.52308	7.92987	11.4884	16.4901	24.5577	46.5311
0.219761	0.382119	0.550282	0.720055	0.870898	1.01723	1.2107	1.39646	1.6609	1.98077	2.46957	3.13226	4.09582	5.52409	7.93628	11.4933	16.502	24.5596	46.5794
0.219795	0.382909	0.550282	0.720627	0.871145	1.01828	1.21093	1.39662	1.66268	1.98407	2.47321	3.13481	4.09582	5.53081	7.93877	11.4994	16.5275	24.5715	46.5912
0.219813	0.383569	0.550282	0.720989	0.871544	1.01936	1.21194	1.3974	1.66398	1.98407	2.47321	3.13499	4.10091	5.53194	7.95153	11.5025	16.5283	24.6106	46.6251
0.219826	0.383925	0.550282	0.721558	0.872572	1.02	1.21342	1.39839	1.66451	1.98407	2.47321	3.13757	4.10238	5.53273	7.95421	11.5066	16.5404	24.6159	46.632
0.219883	0.38407	0.550282	0.721662	0.87275	1.02046	1.21391	1.3999	1.66457	1.98407	2.47321	3.13757	4.10294	5.53327	7.96986	11.5323	16.5543	24.6297	46.7279
0.219885	0.384269	0.550282	0.722213	0.872858	1.02076	1.21564	1.4017	1.67064	1.98516	2.47321	3.13784	4.10578	5.53584	7.96987	11.5334	16.5705	24.6427	46.8172
0.220063	0.384401	0.550282	0.722217	0.873219	1.02145	1.21611	1.40627	1.67128	1.98973	2.47426	3.14078	4.10591	5.55083	7.97394	11.5389	16.5847	24.6443	46.9392
0.2201	0.385334	0.550282	0.722265	0.873823	1.02211	1.21615	1.40838	1.67147	1.99099	2.47605	3.1412	4.117	5.55206	7.98204	11.569	16.5883	24.6941	46.9807
0.220214	0.385383	0.550282	0.72234	0.874262	1.02229	1.218	1.40978	1.67434	1.99497	2.47855	3.14334	4.1213	5.56324	7.98397	11.569	16.5954	24.7199	47.0707
[truncated: 10,368 more rows]
