# Supplementary material for: Long-term intravital imaging of the multicolor-coded tumor microenvironment during combination immunotherapy
Source: eLife. 2016 Nov 18;5:e14756. doi: 10.7554/eLife.14756 (PMC5173323; doi:10.7554/eLife.14756)
Supplement: Figure 3—source data 3. — DOI: http://dx.doi.org/10.7554/eLife.14756.018 [file elife-14756-fig3-data3.xls]

## Sheet: displacement(um)
0	0	0	0	0	0	0	0	0	0	0	0	0	0	0	0.0170108	0	0	0.0754031	0.0273292	0	0	0	0.0381858	0.0600776	0	0.118842	0	0.0658401	0.374355
0	0	0	0	0	0	0	0	0	0	0	0	0	0	0	0.034038	0.0689522	0.0378427	0.0800857	0.106962	0	0	0.0579659	0.0407805	0.100833	0	0.144414	0.0237213	0.11864	0.375012
0	0	0	0	0	0	0	0	0	0	0	0	0	0	0	0.0507092	0.0779205	0.0585704	0.0888894	0.117082	0	0	0.0844755	0.0969661	0.140645	0.191436	0.148012	0.0759307	0.172434	0.433446
0	0	0	0	0	0	0	0	0	0	0	0	0	0	0.0297379	0.0632745	0.0914341	0.0678819	0.099531	0.122771	0.0428867	0	0.0984696	0.129577	0.166397	0.203169	0.157381	0.089213	0.188406	0.456092
0	0	0	0	0	0	0	0	0	0	0	0	0	0	0.0404916	0.0644383	0.101437	0.0827118	0.151423	0.124603	0.0444201	0.026635	0.123774	0.137286	0.169088	0.205876	0.246094	0.135883	0.188742	0.477843
0	0	0	0	0	0	0	0	0	0.0332659	0.0201951	0	0	0.023547	0.0568339	0.0717937	0.105248	0.0986254	0.164909	0.13325	0.0880738	0.0498162	0.153929	0.14507	0.169441	0.210532	0.247285	0.15324	0.208497	0.970173
0	0	0	0	0	0	0.03418	0	0.0449012	0.0336854	0.0258633	0	0	0.0264173	0.0627056	0.123433	0.117472	0.122152	0.17556	0.15937	0.102206	0.0564677	0.185447	0.153337	0.177805	0.22478	0.248487	0.163032	0.26616	1.00832
0	0	0	0	0	0	0.0352019	0	0.0476435	0.0434298	0.0452398	0	0	0.0421406	0.0971589	0.127316	0.120739	0.133145	0.178532	0.161685	0.104577	0.0745876	0.210067	0.162856	0.184653	0.236841	0.25366	0.191355	0.32987	1.0413
0	0	0	0	0	0	0.0360813	0	0.061556	0.0481874	0.0558638	0.0354921	0	0.0508224	0.106152	0.128917	0.124773	0.136179	0.184467	0.165054	0.112921	0.0822787	0.222784	0.186824	0.189172	0.243315	0.256785	0.226753	0.341333	1.23047
0	0	0	0	0	0	0.0360888	0	0.0651149	0.0530458	0.0588596	0.0536941	0.00497846	0.0509054	0.106533	0.134484	0.126768	0.139195	0.191247	0.170979	0.116156	0.0955833	0.223804	0.193475	0.224617	0.246094	0.262135	0.237436	0.35047	1.23047
0	0	0	0	0	0.0119355	0.0380605	0.00728579	0.0654125	0.0641655	0.0684668	0.0609143	0.011359	0.0528805	0.107012	0.135983	0.127222	0.143573	0.193428	0.17612	0.146818	0.143324	0.239302	0.237134	0.236696	0.246094	0.264514	0.248473	0.441803	1.48604
0	0	0	0	0	0.0171671	0.0381406	0.0130743	0.0741004	0.0670605	0.0735327	0.066122	0.0221348	0.0594316	0.113941	0.153673	0.131604	0.144959	0.194466	0.183907	0.169103	0.163174	0.246094	0.237764	0.246094	0.257314	0.264535	0.290782	0.453987	1.49991
0	0	0	0	0	0.0207015	0.0494619	0.0226647	0.0742225	0.0746156	0.078652	0.0695376	0.0287861	0.0666103	0.114537	0.166788	0.132201	0.157866	0.196518	0.197074	0.169135	0.163995	0.246094	0.244104	0.246094	0.28321	0.270315	0.308777	0.528174	1.67584
0	0	0	0	0	0.0291624	0.052462	0.0296185	0.0757593	0.0784758	0.0863943	0.0839289	0.0513094	0.0865712	0.124845	0.169192	0.133292	0.160141	0.207391	0.214593	0.172248	0.235178	0.246094	0.246094	0.246094	0.292146	0.271407	0.321381	0.560474	1.74015
0	0	0	0	0	0.0452039	0.052478	0.0348987	0.0774415	0.0830968	0.0908564	0.0874906	0.0589891	0.0882499	0.141412	0.176468	0.134683	0.162336	0.20993	0.225509	0.174911	0.242188	0.253861	0.256063	0.246094	0.2927	0.297602	0.329511	0.571645	1.75396
0	0	0	0	0	0.0486776	0.0525842	0.0430116	0.0781789	0.0835278	0.0938219	0.0913384	0.0731165	0.0883076	0.153163	0.177982	0.13575	0.174079	0.216272	0.22909	0.178293	0.246094	0.255551	0.268822	0.246094	0.318411	0.298148	0.338261	0.728315	1.82959
0	0	0	0	0.00116082	0.0528182	0.0527274	0.053079	0.0797459	0.083647	0.097104	0.0979472	0.0765673	0.0895506	0.158141	0.180912	0.149558	0.177055	0.221866	0.232906	0.202183	0.246094	0.258553	0.272599	0.246094	0.348029	0.323743	0.363879	0.777397	1.97412
0	0	0	0.00519281	0.0128659	0.0557632	0.0566842	0.0552727	0.0817466	0.0870581	0.101819	0.0998353	0.0840446	0.0898741	0.160759	0.1845	0.149916	0.182346	0.224911	0.236294	0.209795	0.246094	0.264869	0.287864	0.246094	0.348029	0.347372	0.38747	0.804555	2.00544
0	0	0	0.00764477	0.0160858	0.0561094	0.0585445	0.0583779	0.0846188	0.0885216	0.108798	0.100682	0.0986579	0.090297	0.165923	0.185406	0.153452	0.18271	0.244977	0.246094	0.224695	0.246094	0.288042	0.290143	0.250408	0.360998	0.347835	0.414823	0.887304	2.01657
0	0	0	0.00997211	0.0185082	0.0563068	0.0603953	0.0618812	0.0930628	0.091537	0.113737	0.107315	0.10362	0.0948482	0.167122	0.186121	0.158601	0.186566	0.246094	0.246094	0.231704	0.246094	0.294287	0.31115	0.262408	0.364898	0.356141	0.416935	0.909738	2.26219
0	0	0	0.0101661	0.0232145	0.0613519	0.0606591	0.0638893	0.0946106	0.0922416	0.115106	0.116852	0.105877	0.102089	0.168005	0.188425	0.158931	0.194173	0.246094	0.246094	0.246094	0.258293	0.307977	0.318485	0.268736	0.368579	0.373691	0.444927	1.00554	2.29257
0	0	0	0.0146488	0.0263177	0.0649497	0.0621953	0.0708802	0.0955124	0.0980155	0.117977	0.11709	0.111269	0.105267	0.17116	0.188797	0.161254	0.209513	0.246094	0.246094	0.246094	0.266985	0.320382	0.320482	0.314389	0.373187	0.39248	0.457994	1.00934	2.4375
0	0	0	0.024906	0.0273474	0.0652047	0.0659855	0.0740899	0.0961244	0.1007	0.118425	0.118923	0.115819	0.115777	0.171489	0.192671	0.16869	0.211438	0.246094	0.246094	0.246094	0.271739	0.322276	0.328419	0.314771	0.375996	0.409054	0.46893	1.10056	3.39547
0	0	0	0.0277115	0.0283297	0.066133	0.0674307	0.079329	0.0963029	0.101747	0.119971	0.123	0.11697	0.126647	0.173974	0.193877	0.169799	0.21321	0.246094	0.251589	0.246094	0.277936	0.324125	0.344611	0.322267	0.384039	0.43391	0.492188	1.14624	3.48029
0	0	0.0088397	0.027911	0.0303248	0.0671891	0.0677634	0.0804937	0.100519	0.104845	0.120682	0.124856	0.118986	0.127107	0.176647	0.209131	0.171943	0.223377	0.246094	0.262011	0.246094	0.27812	0.33577	0.348029	0.338895	0.390261	0.44384	0.557045	1.23043	3.69141
0	0	0.0121175	0.0336584	0.0315233	0.0672888	0.0681472	0.0816765	0.101338	0.112496	0.121507	0.130538	0.123217	0.12953	0.179565	0.215644	0.175244	0.229914	0.246094	0.26379	0.246094	0.291173	0.346779	0.348029	0.348029	0.412819	0.457486	0.563688	1.25484	3.89108
0	0	0.0162235	0.0385991	0.039557	0.0682342	0.0719593	0.0819527	0.106478	0.114098	0.121719	0.131801	0.123601	0.134252	0.189065	0.218197	0.183628	0.242181	0.246094	0.280106	0.246094	0.295429	0.348029	0.348029	0.386762	0.425996	0.460304	0.566404	1.25484	3.89108
0	0	0.016458	0.0392845	0.0438221	0.0703618	0.0742267	0.082949	0.110073	0.115032	0.123913	0.133652	0.12682	0.137665	0.189658	0.219199	0.187426	0.24438	0.263361	0.28493	0.252531	0.300284	0.349544	0.348029	0.393951	0.431156	0.491764	0.614091	1.25484	4.40327
0	0	0.0165492	0.0407315	0.0438531	0.0723583	0.0748426	0.0848165	0.112008	0.122001	0.127729	0.133998	0.131565	0.138113	0.190609	0.223779	0.19042	0.24588	0.267453	0.290052	0.267679	0.314866	0.355755	0.353122	0.394162	0.437191	0.492188	0.624403	1.29167	4.48678
0	0	0.0226971	0.0415702	0.0466465	0.0724062	0.0748532	0.0881951	0.113698	0.122006	0.12898	0.137642	0.139181	0.142381	0.195189	0.225468	0.19395	0.246094	0.267901	0.292483	0.27061	0.324675	0.361743	0.36573	0.395606	0.439551	0.513415	0.625196	1.42287	4.54204
0	0	0.0237531	0.0424026	0.0522148	0.0725989	0.0761216	0.0897869	0.113988	0.122512	0.129651	0.138572	0.144138	0.145067	0.198651	0.226875	0.196423	0.246094	0.268786	0.299068	0.272844	0.325833	0.363375	0.374473	0.414542	0.444379	0.519998	0.668194	1.46068	4.69642
0	0	0.0254115	0.0427956	0.0529292	0.0734437	0.0762355	0.0902135	0.114734	0.126162	0.130004	0.141959	0.145229	0.148042	0.200269	0.228354	0.206828	0.246094	0.27474	0.30277	0.27826	0.327739	0.366823	0.376757	0.42757	0.447873	0.537623	0.843342	1.46346	5.50282
0	0	0.0256014	0.0441946	0.0618446	0.0734597	0.0771853	0.0904114	0.117806	0.127631	0.131154	0.142555	0.147257	0.154429	0.208668	0.229467	0.207215	0.246094	0.277034	0.303208	0.300872	0.344213	0.373753	0.388869	0.432796	0.45131	0.566174	0.879513	1.47656	5.50282
0	0	0.0281971	0.0459889	0.0632018	0.0738889	0.0792526	0.0909104	0.117843	0.128314	0.138526	0.143297	0.148787	0.158374	0.208872	0.235058	0.211352	0.246094	0.278043	0.30764	0.317845	0.346142	0.377164	0.415312	0.441008	0.458499	0.575835	0.888764	1.48144	5.56464
0	0	0.0284622	0.0483881	0.0637131	0.0760506	0.0795097	0.0925094	0.11813	0.132842	0.142834	0.149685	0.150037	0.158582	0.211356	0.236239	0.218138	0.246094	0.290198	0.308966	0.32576	0.347754	0.379427	0.433842	0.464505	0.459517	0.598989	0.90689	1.48949	5.71526
0	0	0.0300728	0.0492865	0.0660963	0.0775274	0.0798454	0.0936911	0.119503	0.132889	0.149678	0.151414	0.15604	0.165666	0.214997	0.246094	0.219554	0.246094	0.29188	0.311908	0.330274	0.348029	0.38239	0.435061	0.479455	0.466717	0.603678	0.922096	1.49693	5.79368
0	0	0.030319	0.050469	0.0715863	0.0791743	0.0801212	0.0950906	0.120368	0.136189	0.151651	0.157193	0.15696	0.176468	0.216078	0.246094	0.223013	0.246094	0.295766	0.312063	0.339185	0.348029	0.383671	0.458104	0.48243	0.478902	0.620333	1.06482	1.50332	6.15234
0	0	0.0303906	0.0534633	0.0718898	0.0813958	0.0806957	0.0975662	0.120599	0.137961	0.153803	0.157838	0.159003	0.181313	0.239934	0.246094	0.226374	0.246094	0.2961	0.318222	0.345307	0.348029	0.386666	0.480815	0.482875	0.480392	0.65145	1.07179	1.65757	6.3164
0	0.00726081	0.0382605	0.0548702	0.0720085	0.0817532	0.0807789	0.0975914	0.124387	0.13844	0.154521	0.158444	0.161333	0.183672	0.240742	0.246094	0.229183	0.246094	0.297607	0.319174	0.345409	0.360516	0.395776	0.487463	0.492188	0.492188	0.678081	1.10374	1.68102	6.55752
0	0.0169117	0.0387848	0.0561877	0.0746018	0.0863138	0.082552	0.0978954	0.131831	0.144218	0.156627	0.160837	0.163144	0.188502	0.24132	0.246094	0.230091	0.246094	0.298304	0.322295	0.348029	0.361636	0.419828	0.489082	0.496862	0.495718	0.696058	1.10976	1.76768	7.14394
0	0.0173396	0.0395484	0.0572686	0.0762232	0.0890344	0.0846829	0.0993613	0.133216	0.147026	0.157502	0.161525	0.166092	0.193981	0.245937	0.246094	0.232351	0.246094	0.298405	0.325074	0.360544	0.364501	0.43765	0.491202	0.497907	0.503531	0.698448	1.16617	1.79622	7.1748
0	0.0187944	0.0398123	0.0597158	0.0765705	0.0904408	0.0890292	0.103409	0.135303	0.149072	0.157962	0.163356	0.166984	0.194922	0.246094	0.246094	0.232453	0.256752	0.300786	0.32784	0.366548	0.368011	0.447645	0.497999	0.504062	0.507317	0.707584	1.19684	1.80574	7.51643
0	0.0189847	0.0472912	0.0606097	0.0766455	0.0919717	0.0903328	0.110734	0.141512	0.150458	0.162663	0.168158	0.167403	0.20833	0.246094	0.246094	0.232736	0.259612	0.302203	0.341319	0.366606	0.369991	0.452133	0.504848	0.504515	0.520735	0.725645	1.21394	1.82356	7.72717
0	0.0198167	0.0486111	0.0629823	0.0771279	0.0920053	0.0904451	0.110785	0.142986	0.151798	0.163529	0.169589	0.169155	0.209074	0.246094	0.246227	0.246094	0.260955	0.305373	0.344569	0.367696	0.383616	0.456235	0.509394	0.504729	0.523934	0.738281	1.2299	1.85843	7.8923
0	0.0202385	0.0496148	0.0638665	0.0779209	0.0923008	0.0919391	0.111568	0.143203	0.152824	0.164855	0.173425	0.171525	0.213776	0.246094	0.247876	0.246094	0.263257	0.311163	0.347178	0.376505	0.383844	0.464335	0.514717	0.517281	0.526406	0.738281	1.23047	1.95575	8.61328
0	0.0203679	0.0496818	0.0662292	0.0795725	0.0931439	0.0945066	0.114634	0.143651	0.157008	0.16503	0.178023	0.173504	0.215161	0.246094	0.248047	0.246094	0.26389	0.313227	0.348029	0.376723	0.38448	0.466077	0.521427	0.521609	0.540435	0.745648	1.23047	2.03676	8.95795
0	0.0208269	0.0497724	0.0664553	0.0827517	0.0934438	0.0956824	0.123542	0.148692	0.157559	0.171004	0.178239	0.178916	0.222202	0.246094	0.249081	0.246094	0.267231	0.314652	0.348029	0.377618	0.386172	0.468731	0.522839	0.523429	0.542739	0.756763	1.23047	2.16331	9.02904
0	0.020918	0.052462	0.0666046	0.086077	0.0934892	0.0974653	0.12358	0.155053	0.158023	0.172035	0.182531	0.18167	0.225923	0.246094	0.255805	0.246094	0.281375	0.31898	0.348029	0.397096	0.395394	0.477053	0.524321	0.528897	0.552708	0.805567	1.25484	2.31202	9.61027
0	0.0210223	0.052802	0.0668733	0.0864158	0.0937465	0.09946	0.126329	0.157524	0.158608	0.172697	0.194356	0.18231	0.228596	0.246094	0.259004	0.246094	0.285631	0.329118	0.348029	0.399715	0.403335	0.481837	0.524826	0.550282	0.5536	0.869972	1.25484	2.32016	9.92036
0	0.0227027	0.0547792	0.0677081	0.0865852	0.0945369	0.102147	0.126789	0.15821	0.161797	0.174998	0.195211	0.18582	0.229128	0.246094	0.262342	0.246094	0.285692	0.3315	0.349076	0.400434	0.415286	0.492188	0.529788	0.554301	0.557425	0.96179	1.30781	2.35318	10.5849
0	0.0232663	0.0562565	0.0691072	0.0895387	0.0947365	0.102195	0.128586	0.159769	0.163115	0.180036	0.196458	0.187359	0.2297	0.246094	0.267875	0.246094	0.294956	0.340683	0.362101	0.415217	0.415343	0.492188	0.530873	0.562113	0.572359	0.968463	1.37601	2.38502	10.7309
0	0.0258448	0.0579082	0.0709898	0.0899401	0.0954791	0.104057	0.128875	0.162878	0.163124	0.183451	0.199868	0.188071	0.23193	0.247972	0.269324	0.246094	0.296398	0.348029	0.387824	0.417051	0.425679	0.492188	0.531222	0.570046	0.594891	0.992466	1.39212	2.41214	11.1424
0	0.0268005	0.0615314	0.0716401	0.0900422	0.0956431	0.104336	0.129406	0.165622	0.16636	0.185757	0.199934	0.190156	0.237403	0.249208	0.27028	0.248752	0.296937	0.348029	0.394812	0.421161	0.426215	0.492188	0.542558	0.570226	0.650713	1.00133	1.40012	2.46094	11.7354
0	0.0268482	0.0616309	0.0738717	0.0907606	0.0975352	0.106989	0.130096	0.166759	0.16966	0.186183	0.201144	0.19377	0.237438	0.250131	0.271111	0.250646	0.302507	0.348029	0.402593	0.421587	0.427557	0.493347	0.546936	0.570451	0.660721	1.00222	1.42578	2.73194	12.098
0	0.0335828	0.0638793	0.0743872	0.0912673	0.098065	0.107255	0.136684	0.168808	0.170991	0.192364	0.20457	0.198197	0.23758	0.252504	0.273562	0.251041	0.306965	0.348029	0.406262	0.430167	0.433738	0.514872	0.550282	0.578484	0.683084	1.01467	1.46807	2.97356	12.2709
0	0.0339083	0.0650988	0.0758009	0.0915232	0.098444	0.109529	0.13795	0.169343	0.172488	0.1927	0.204634	0.198242	0.244122	0.254343	0.276402	0.25551	0.307816	0.348029	0.414001	0.431813	0.434529	0.521254	0.550282	0.582713	0.69673	1.01467	1.4984	3.19922	12.3047
0	0.0341446	0.0657112	0.0758637	0.0925824	0.0998428	0.110348	0.139341	0.16966	0.17263	0.194134	0.21165	0.200118	0.246094	0.261389	0.278142	0.262768	0.312305	0.348029	0.42246	0.434404	0.435777	0.525158	0.550282	0.593671	0.699316	1.03908	1.50901	3.34724	12.319
0	0.0366196	0.066079	0.0766546	0.0956151	0.100244	0.113503	0.139649	0.172183	0.175936	0.198873	0.214601	0.205156	0.246094	0.261638	0.279122	0.265333	0.316495	0.349038	0.425661	0.436391	0.456503	0.528276	0.55383	0.612333	0.71453	1.09269	1.53928	3.43518	12.5484
0	0.0367317	0.0664459	0.0775146	0.0983566	0.100614	0.116319	0.141248	0.17307	0.17737	0.200742	0.217107	0.207896	0.246094	0.268541	0.282189	0.26864	0.322604	0.360065	0.426079	0.447498	0.457672	0.529795	0.55974	0.612415	0.752777	1.09834	1.55513	3.44531	12.6685
0	0.037476	0.0668208	0.0793095	0.104172	0.101661	0.118211	0.142045	0.174043	0.181856	0.203021	0.217781	0.208416	0.246094	0.276372	0.283727	0.271168	0.329681	0.36109	0.430834	0.450981	0.462515	0.53561	0.571055	0.615074	0.760899	1.10024	1.55643	3.48029	12.7415
0	0.0398879	0.0680133	0.0826598	0.104515	0.103172	0.11874	0.142151	0.17411	0.186895	0.203032	0.218011	0.21608	0.246094	0.27639	0.288858	0.276307	0.331681	0.36218	0.434514	0.451461	0.463364	0.5383	0.573106	0.616713	0.778217	1.13104	1.57403	3.52353	12.8465
0	0.0399781	0.0693786	0.0826908	0.10592	0.104518	0.119111	0.143285	0.175085	0.18727	0.205199	0.21955	0.222012	0.246094	0.277819	0.289945	0.280622	0.336738	0.362656	0.438567	0.46032	0.466113	0.542781	0.584398	0.636823	0.778217	1.15776	1.57666	3.52353	13.2526
0	0.0402038	0.0697527	0.0827303	0.107521	0.104837	0.124749	0.144678	0.175576	0.187282	0.207304	0.219571	0.222318	0.246094	0.27898	0.295114	0.281594	0.337783	0.363012	0.438817	0.462931	0.473308	0.54418	0.588286	0.639207	0.787745	1.1666	1.57883	3.94518	13.5352
0	0.0417131	0.0707104	0.084435	0.109427	0.107995	0.124826	0.146641	0.180085	0.18882	0.209455	0.22019	0.227941	0.246094	0.281246	0.29782	0.28204	0.348611	0.388069	0.443732	0.472287	0.473376	0.549943	0.612474	0.653619	0.845585	1.19497	1.59562	3.94821	13.5519
0	0.0420628	0.0718957	0.084583	0.109763	0.10853	0.125592	0.147526	0.186901	0.189277	0.213083	0.222951	0.228822	0.246094	0.290287	0.300166	0.285518	0.351254	0.390142	0.450925	0.478967	0.476343	0.550282	0.620246	0.657163	0.887304	1.20349	1.59768	4.02804	13.9212
0	0.0435775	0.0726624	0.0855232	0.110545	0.109839	0.130167	0.147841	0.187525	0.189723	0.213911	0.226739	0.231599	0.246094	0.290902	0.302151	0.286267	0.357083	0.39559	0.453066	0.483419	0.477	0.550282	0.623431	0.657384	0.901915	1.2367	1.6025	4.06835	14.0295
0	0.0453135	0.0730996	0.0857668	0.111081	0.110034	0.130502	0.147974	0.193714	0.189893	0.214995	0.231515	0.232338	0.246094	0.291013	0.307496	0.296062	0.358536	0.400813	0.458861	0.489049	0.477841	0.554702	0.626233	0.681834	0.908833	1.24171	1.71156	4.07358	14.3341
0	0.0453915	0.0741282	0.0863584	0.111503	0.111604	0.130808	0.152749	0.196444	0.193588	0.215343	0.232345	0.235073	0.246094	0.291216	0.308514	0.313268	0.35953	0.405011	0.460532	0.489778	0.492188	0.563409	0.630108	0.689253	0.909669	1.25484	1.74015	4.2162	15.4177
0	0.0468102	0.0748728	0.0883735	0.113766	0.112581	0.134613	0.153213	0.19729	0.194662	0.216647	0.232584	0.237652	0.246154	0.291823	0.309141	0.320626	0.36034	0.411672	0.46788	0.492188	0.492188	0.569547	0.647314	0.696058	0.923045	1.28969	1.77295	4.24824	15.7577
0	0.0478591	0.0751987	0.089224	0.115521	0.112592	0.137351	0.156225	0.198901	0.195491	0.218321	0.242392	0.239336	0.246443	0.293535	0.315594	0.323588	0.362022	0.412948	0.472939	0.492188	0.492188	0.583389	0.653905	0.696307	0.923125	1.31009	1.78155	4.41284	15.7577
0	0.0492072	0.076588	0.0900008	0.115566	0.116635	0.137554	0.156724	0.200074	0.198852	0.218538	0.246094	0.240696	0.249157	0.295667	0.316236	0.333221	0.377892	0.424904	0.47364	0.493747	0.501117	0.586724	0.674786	0.706308	0.924821	1.32624	1.78701	4.46404	16.0433
0	0.0496892	0.0766378	0.0905949	0.11651	0.119095	0.139166	0.157144	0.202813	0.199058	0.220501	0.246094	0.246094	0.250135	0.301908	0.318261	0.333892	0.382029	0.430484	0.480843	0.496936	0.504235	0.590752	0.679747	0.738281	0.930284	1.32625	1.82147	4.52994	16.1843
0	0.0504684	0.0791214	0.0907724	0.11833	0.121109	0.139256	0.157667	0.202937	0.199505	0.223706	0.246094	0.246094	0.250958	0.302455	0.318577	0.338156	0.388898	0.431599	0.484584	0.4993	0.521128	0.592596	0.684778	0.756155	0.96278	1.33123	1.96875	4.53821	17.2266
0	0.0508042	0.0798985	0.0914151	0.119772	0.122155	0.140874	0.16096	0.203295	0.199931	0.224307	0.246094	0.246094	0.256231	0.304942	0.319995	0.342697	0.389821	0.432478	0.485404	0.509483	0.527888	0.596813	0.695442	0.766856	0.964813	1.33429	2.13051	4.6263	17.2266
0	0.0519259	0.0801028	0.0917598	0.122015	0.122931	0.142951	0.16287	0.204711	0.201581	0.224932	0.246094	0.246094	0.260738	0.306295	0.321207	0.344499	0.391547	0.439446	0.487443	0.510864	0.528417	0.603232	0.696058	0.778217	0.969588	1.34285	2.14047	4.75286	17.3147
0	0.0520972	0.0819616	0.0925708	0.122029	0.123814	0.143294	0.166835	0.208906	0.202377	0.227046	0.246094	0.246094	0.262072	0.307015	0.324501	0.345249	0.392197	0.441289	0.489344	0.520974	0.529702	0.607669	0.696058	0.778217	1.01467	1.3716	2.21484	4.77828	17.5396
0	0.052215	0.0821284	0.0926197	0.122086	0.124165	0.143787	0.167894	0.211199	0.204147	0.229588	0.246094	0.246094	0.262896	0.307892	0.326298	0.348029	0.402199	0.442379	0.492188	0.521064	0.540209	0.609451	0.700428	0.778217	1.01467	1.38346	2.2954	4.84753	17.6481
0	0.0538875	0.0848885	0.0929342	0.122996	0.124331	0.14699	0.168859	0.213028	0.204663	0.229756	0.246094	0.246094	0.264793	0.308077	0.329275	0.348029	0.402409	0.443391	0.492188	0.52123	0.550282	0.613637	0.700748	0.778217	1.01467	1.39212	2.3643	4.97694	18.4199
0	0.0539462	0.0858026	0.0930042	0.125409	0.12438	0.148757	0.169806	0.213851	0.206483	0.231261	0.246094	0.246094	0.265548	0.308324	0.333729	0.348194	0.403505	0.450313	0.492188	0.52368	0.550282	0.632853	0.725823	0.791769	1.01775	1.42757	2.42374	4.98054	18.7682
0	0.0541603	0.0864523	0.0938022	0.126237	0.127943	0.152994	0.170877	0.21401	0.209387	0.232631	0.246094	0.246094	0.267443	0.309276	0.334277	0.348872	0.404679	0.46372	0.492188	0.52521	0.550282	0.632971	0.72992	0.795638	1.03732	1.4315	2.42892	4.98478	19.2932
0	0.054608	0.0885128	0.0938057	0.128438	0.128114	0.153322	0.174123	0.214905	0.210509	0.232964	0.246094	0.246094	0.269545	0.312512	0.341784	0.356028	0.406442	0.467382	0.492188	0.534725	0.550282	0.634827	0.731477	0.81375	1.08364	1.43496	2.61277	5.2899	19.2952
0	0.054879	0.0891787	0.0942081	0.130554	0.128314	0.153849	0.174585	0.215145	0.210703	0.238278	0.248047	0.246094	0.269954	0.314626	0.343629	0.360134	0.416285	0.479372	0.492188	0.536912	0.553182	0.63716	0.733511	0.814153	1.11499	1.43864	2.70703	5.30522	19.6875
0	0.0560146	0.0895086	0.0961564	0.130716	0.128395	0.156824	0.180274	0.216098	0.211481	0.240934	0.248047	0.248246	0.270907	0.315331	0.348029	0.366959	0.417651	0.481492	0.492188	0.538643	0.55465	0.643334	0.738281	0.819327	1.13935	1.43991	2.72515	5.32065	19.7259
0	0.057754	0.0903471	0.0967641	0.130898	0.128727	0.157121	0.182035	0.216362	0.219027	0.244208	0.248859	0.250431	0.271491	0.318566	0.348029	0.374737	0.41813	0.489956	0.503552	0.540118	0.558164	0.647357	0.738281	0.824068	1.13962	1.46707	2.74271	5.44574	20.4513
0	0.0618163	0.0913901	0.0978018	0.131614	0.130037	0.158151	0.184867	0.216519	0.220056	0.244291	0.251364	0.25227	0.274797	0.320152	0.348029	0.375	0.420454	0.492188	0.517519	0.542327	0.561793	0.648984	0.738281	0.833963	1.15087	1.47656	2.78568	5.46469	20.9541
0	0.0637584	0.0919383	0.0980603	0.136861	0.130386	0.158362	0.185339	0.217348	0.223639	0.246094	0.251395	0.252797	0.286009	0.323054	0.348029	0.375162	0.420657	0.492188	0.53669	0.542511	0.588186	0.655914	0.738281	0.868368	1.1534	1.48005	2.82817	5.58976	21.7692
0	0.0654846	0.0936743	0.0990401	0.13717	0.130926	0.159428	0.186766	0.217982	0.224235	0.246094	0.251988	0.253305	0.287522	0.323302	0.348398	0.38312	0.423307	0.492188	0.541674	0.547159	0.591392	0.664072	0.738567	0.883133	1.16775	1.48133	2.88045	5.6001	22.1826
0	0.0655425	0.0945231	0.0990543	0.137288	0.131057	0.16341	0.193711	0.219184	0.225805	0.246094	0.252439	0.254726	0.288708	0.326873	0.355038	0.390518	0.424861	0.492188	0.546328	0.548044	0.591464	0.670324	0.74027	0.894608	1.18074	1.4888	2.97356	5.61719	22.4539
0	0.0668208	0.0953963	0.0992323	0.137468	0.131565	0.164393	0.19507	0.223091	0.22887	0.246094	0.255018	0.259424	0.289528	0.329084	0.355768	0.392905	0.426028	0.492188	0.548609	0.549176	0.596402	0.691158	0.744704	0.904285	1.1866	1.4893	2.97356	6.00791	22.4616
0	0.067473	0.0958542	0.100215	0.138696	0.134538	0.165294	0.199079	0.224178	0.232113	0.246094	0.255484	0.265837	0.292081	0.3294	0.356765	0.397735	0.431988	0.492188	0.550282	0.550021	0.602822	0.696058	0.7503	0.904567	1.20124	1.4917	2.99386	6.15995	22.7269
0	0.0675499	0.0963548	0.100526	0.139472	0.135703	0.165872	0.199761	0.225341	0.233776	0.246094	0.257259	0.268463	0.296555	0.332769	0.361784	0.398804	0.432427	0.492188	0.550282	0.550282	0.608928	0.696058	0.75224	0.906093	1.21059	1.49565	3.23686	6.52691	23.3465
0	0.0676541	0.0977962	0.102265	0.139542	0.136247	0.168608	0.200527	0.225812	0.234947	0.246094	0.259432	0.270567	0.302764	0.336964	0.366169	0.401878	0.436327	0.493348	0.550282	0.550282	0.615063	0.705845	0.754207	0.908674	1.21071	1.49693	3.23686	6.53493	23.5081
0	0.0677009	0.0978001	0.102927	0.140195	0.137038	0.17023	0.200845	0.227497	0.236902	0.246094	0.268663	0.271994	0.306988	0.340527	0.368614	0.410614	0.441069	0.497133	0.550282	0.550282	0.619146	0.706114	0.765471	0.919933	1.21331	1.55223	3.25965	6.64909	23.5081
0	0.0681281	0.0996866	0.103499	0.14057	0.139199	0.172446	0.201943	0.228787	0.237381	0.246094	0.271782	0.272646	0.307844	0.348029	0.371395	0.418687	0.442474	0.507843	0.550282	0.550282	0.628058	0.713834	0.777268	0.929772	1.23047	1.55643	3.28932	6.64909	24.5169
0	0.0693017	0.100152	0.105055	0.147016	0.139377	0.176213	0.204501	0.228921	0.237684	0.246094	0.273089	0.272919	0.312233	0.348029	0.380592	0.420134	0.445095	0.50837	0.550282	0.550282	0.62861	0.71787	0.778217	0.932391	1.23047	1.59984	3.31743	6.68542	24.7548
0	0.0695385	0.100394	0.106424	0.147597	0.139896	0.176745	0.2049	0.229896	0.238336	0.246094	0.281555	0.27456	0.313337	0.348029	0.382841	0.426489	0.445184	0.510845	0.550282	0.550282	0.630443	0.720144	0.778217	0.932542	1.23047	1.65576	3.45409	6.71705	25.3524
0	0.0703192	0.101081	0.107385	0.147726	0.140354	0.179821	0.205264	0.232453	0.239266	0.246094	0.282043	0.275664	0.321996	0.348029	0.383994	0.430439	0.445936	0.513869	0.553692	0.550282	0.630681	0.723625	0.781128	0.941539	1.23702	1.72266	3.45409	6.7476	25.6929
0	0.0705465	0.101648	0.108105	0.147785	0.141831	0.180254	0.205488	0.233056	0.239978	0.246094	0.285718	0.276738	0.323169	0.348029	0.389108	0.432465	0.44701	0.516256	0.555628	0.550282	0.641042	0.730207	0.785533	0.94684	1.25484	1.72266	3.52353	6.80662	26.1022
0	0.0706636	0.102096	0.108447	0.148246	0.142381	0.180459	0.208106	0.23422	0.24039	0.246094	0.285718	0.277809	0.32368	0.348029	0.395673	0.435616	0.449556	0.519766	0.555727	0.554531	0.648814	0.738281	0.789231	0.953907	1.25484	1.77461	3.54921	6.89502	26.1601
0	0.0718986	0.103031	0.109035	0.148349	0.14356	0.181332	0.209633	0.234657	0.244308	0.246094	0.287188	0.280874	0.325088	0.348029	0.397128	0.439995	0.451248	0.520804	0.558304	0.55465	0.658556	0.738281	0.789645	0.962602	1.2575	1.78877	3.6263	7.01608	26.8304
0	0.0719803	0.104449	0.112218	0.148906	0.146475	0.181876	0.211861	0.238334	0.244536	0.246094	0.296081	0.282649	0.325861	0.348421	0.39725	0.444435	0.453608	0.523554	0.561985	0.556673	0.664253	0.738281	0.793082	0.981707	1.27946	1.91155	3.65845	7.03497	26.9863
0	0.072411	0.105726	0.114079	0.149649	0.152211	0.182465	0.214485	0.238729	0.246094	0.246094	0.298228	0.294529	0.334023	0.349012	0.403877	0.44453	0.458841	0.524461	0.563391	0.558935	0.667446	0.738281	0.804821	0.983648	1.28576	1.96875	3.85198	7.06576	27.2376
0	0.0725623	0.108098	0.114172	0.150886	0.157534	0.182502	0.216041	0.238816	0.246094	0.248047	0.299847	0.295635	0.335035	0.350417	0.409987	0.451529	0.461352	0.524997	0.563597	0.560875	0.667751	0.738281	0.817959	0.984269	1.28863	1.96875	3.98896	7.27896	27.8967
0	0.072705	0.108858	0.115187	0.150905	0.159608	0.182502	0.217513	0.239487	0.246094	0.248071	0.301646	0.296546	0.33506	0.350791	0.412159	0.452559	0.474851	0.528722	0.569851	0.561271	0.668026	0.738433	0.822986	0.984375	1.29963	2.11128	3.99723	7.34168	28.086
0	0.0731313	0.110412	0.115369	0.151187	0.160247	0.184511	0.217976	0.242612	0.246094	0.249046	0.304979	0.308832	0.33905	0.351613	0.413099	0.452938	0.478357	0.531999	0.572512	0.565207	0.669448	0.738569	0.826854	0.984375	1.30854	2.15388	4.08184	7.3746	28.4076
0	0.0737001	0.110558	0.115671	0.153291	0.160275	0.184931	0.219178	0.243335	0.246094	0.254411	0.307224	0.310717	0.347598	0.351954	0.414206	0.455233	0.479612	0.53472	0.574864	0.565875	0.671116	0.758444	0.827281	0.998227	1.31378	2.20113	4.09147	7.37997	28.5523
0	0.0746201	0.111975	0.11576	0.154079	0.160568	0.185186	0.219343	0.243402	0.246094	0.256711	0.308545	0.311364	0.347786	0.356694	0.417092	0.458017	0.479952	0.534779	0.589917	0.572978	0.680634	0.76586	0.830225	1.00853	1.32188	2.22847	4.11097	7.72358	29.2479
0	0.0751035	0.111995	0.115932	0.154941	0.164136	0.185456	0.219988	0.243775	0.246094	0.257471	0.3104	0.316277	0.347948	0.357913	0.417988	0.460185	0.482668	0.539644	0.591662	0.591899	0.682487	0.773454	0.839963	1.01395	1.32518	2.22847	4.12571	7.73075	29.2479
0	0.0751156	0.112171	0.117531	0.154973	0.165111	0.186181	0.221789	0.244964	0.246094	0.261279	0.315738	0.317415	0.348029	0.359281	0.434677	0.463705	0.483916	0.540283	0.591704	0.592866	0.686879	0.774317	0.844468	1.01545	1.33208	2.24645	4.18359	7.78217	29.6515
0	0.0751521	0.112309	0.117667	0.156976	0.1652	0.187295	0.222948	0.246094	0.246094	0.268048	0.316452	0.320974	0.348029	0.359755	0.435882	0.465605	0.484292	0.544493	0.596493	0.595672	0.695837	0.777825	0.851133	1.03719	1.3724	2.36147	4.19034	8.16345	29.6556
0.00520898	0.0765293	0.112561	0.118912	0.15817	0.165839	0.187536	0.224155	0.246094	0.246094	0.269812	0.319214	0.323588	0.348029	0.36655	0.447912	0.473264	0.487537	0.548461	0.614965	0.598691	0.696058	0.778217	0.867314	1.10056	1.39212	2.42374	4.25842	8.4105	30.4401
0.00993637	0.0766598	0.113611	0.119848	0.159916	0.166342	0.190014	0.22432	0.246094	0.246094	0.270732	0.321732	0.325734	0.348029	0.369621	0.450124	0.477363	0.492188	0.550282	0.615013	0.601952	0.701238	0.778217	0.886934	1.10056	1.39318	2.42374	4.29557	8.81139	31.3709
0.0110366	0.077758	0.113894	0.120784	0.160501	0.167076	0.190176	0.226901	0.246094	0.246094	0.273063	0.322994	0.330241	0.348029	0.379268	0.456491	0.478017	0.492188	0.550282	0.6196	0.606335	0.706569	0.778217	0.887304	1.11353	1.41068	2.46094	4.30138	8.87304	32.7106
0.0128347	0.0783171	0.114076	0.120987	0.160833	0.167891	0.191282	0.227548	0.246094	0.246094	0.27716	0.325049	0.330327	0.348029	0.380696	0.458512	0.48184	0.492188	0.550282	0.620609	0.612275	0.719391	0.778217	0.887304	1.11471	1.42966	2.47321	4.303	9.0253	33.279
0.0140415	0.0783925	0.114149	0.122493	0.161156	0.169076	0.191878	0.227744	0.246094	0.246094	0.277948	0.329428	0.331874	0.348029	0.380971	0.459624	0.481965	0.492188	0.550282	0.620623	0.620499	0.72036	0.778217	0.887304	1.11967	1.43496	2.50967	4.38157	9.10879	33.4137
0.0140877	0.0785965	0.114871	0.123643	0.161811	0.171154	0.193485	0.227931	0.246094	0.246094	0.279326	0.329501	0.334233	0.348029	0.381697	0.466582	0.482286	0.492188	0.550282	0.62274	0.630897	0.728255	0.780378	0.891649	1.14427	1.44086	2.53369	4.42969	9.50703	33.5853
0.0161417	0.0788155	0.114967	0.124328	0.162573	0.172251	0.193956	0.230287	0.246094	0.246094	0.279618	0.329741	0.337186	0.348029	0.381835	0.477296	0.484377	0.496094	0.552567	0.623394	0.632257	0.733262	0.788341	0.906227	1.14485	1.47226	2.53369	4.43187	9.52738	34.1213
0.0169018	0.0788347	0.11522	0.12447	0.162748	0.172461	0.19409	0.232958	0.246094	0.246094	0.279916	0.330597	0.337675	0.350529	0.381906	0.478496	0.485946	0.498906	0.559925	0.623524	0.63868	0.738281	0.789907	0.910507	1.1729	1.48156	2.54646	4.44072	9.58503	34.1884
0.0169715	0.0788869	0.116429	0.124952	0.163063	0.173025	0.194745	0.233105	0.246094	0.246531	0.280035	0.334764	0.338756	0.353513	0.383726	0.481521	0.487876	0.501024	0.560097	0.625489	0.659063	0.738281	0.796787	0.913174	1.18425	1.49693	2.58973	4.49079	10.0653	34.321
0.0171035	0.0812069	0.116518	0.127592	0.163249	0.173691	0.195057	0.233853	0.246094	0.246777	0.285455	0.335378	0.348029	0.354556	0.384342	0.484932	0.491535	0.506024	0.578872	0.628791	0.660823	0.738281	0.801803	0.940051	1.21228	1.49693	2.61601	4.52438	10.3476	34.5649
0.0172274	0.0814727	0.116904	0.127607	0.164989	0.173912	0.196596	0.234013	0.246094	0.246996	0.28615	0.337588	0.348029	0.355343	0.384975	0.489593	0.492188	0.507718	0.579128	0.633478	0.663028	0.738558	0.812792	0.947261	1.21621	1.49693	2.71819	4.54783	10.3476	34.7376
0.0174171	0.0823334	0.1174	0.128168	0.165658	0.176984	0.196975	0.234045	0.246094	0.247151	0.287313	0.339482	0.348029	0.357559	0.388007	0.491486	0.492188	0.510096	0.583039	0.639536	0.679594	0.744141	0.815096	0.984375	1.2303	1.49693	2.76384	4.5548	10.3722	34.8052
0.0180141	0.0823441	0.117826	0.129746	0.165666	0.178172	0.199448	0.234967	0.246094	0.252305	0.287528	0.34028	0.348029	0.35823	0.388138	0.492188	0.492188	0.511532	0.586135	0.64287	0.681132	0.747861	0.825536	0.984375	1.23047	1.51576	2.8059	4.72731	10.3821	34.887
0.0182084	0.0824059	0.118716	0.130017	0.169913	0.178333	0.200733	0.23566	0.246094	0.253806	0.289724	0.34084	0.348029	0.358976	0.3883	0.492188	0.492188	0.514197	0.587478	0.645049	0.684193	0.759975	0.83239	0.984375	1.23047	1.53778	2.85342	4.83198	10.8165	34.9765
0.0190822	0.0826774	0.11947	0.130111	0.170118	0.178976	0.201411	0.236124	0.246094	0.256442	0.291209	0.343303	0.349025	0.363053	0.390118	0.492188	0.492188	0.515235	0.594615	0.652947	0.689328	0.761139	0.832897	0.984375	1.23047	1.55966	2.8619	4.83688	10.9751	35.1775
0.0193156	0.0833042	0.120079	0.130534	0.171626	0.179261	0.202223	0.236264	0.246094	0.256476	0.292316	0.348029	0.350573	0.364641	0.393724	0.492188	0.492188	0.519933	0.5959	0.656256	0.691248	0.764163	0.833958	0.984375	1.23047	1.56381	2.90146	4.90338	11.1179	35.5135
0.0198472	0.083342	0.120717	0.131328	0.17237	0.182552	0.205087	0.2374	0.246094	0.257139	0.293308	0.348029	0.351081	0.365344	0.399037	0.492188	0.492188	0.521346	0.601839	0.665406	0.693577	0.769418	0.835788	0.984375	1.23536	1.58492	2.96336	4.9423	11.1433	35.8318
0.021542	0.083375	0.120999	0.131445	0.172618	0.183349	0.205985	0.238687	0.246094	0.259888	0.293347	0.348029	0.351271	0.367807	0.400629	0.492188	0.494425	0.528374	0.60702	0.673135	0.699413	0.77068	0.848041	0.984375	1.24924	1.62383	2.96336	5.05873	11.2935	35.874
0.0221245	0.0846121	0.121816	0.1315	0.174046	0.184507	0.206305	0.238762	0.248047	0.261003	0.294331	0.348029	0.358119	0.367811	0.407176	0.492188	0.498278	0.541544	0.612173	0.674792	0.701077	0.778217	0.860322	0.984375	1.25484	1.6242	2.97356	5.1008	11.3526	36.873
0.0248889	0.0853647	0.122149	0.131727	0.17519	0.184979	0.207635	0.239863	0.248047	0.266325	0.294695	0.348029	0.362393	0.372492	0.407496	0.492188	0.498802	0.550282	0.615945	0.680739	0.705964	0.778217	0.869019	0.984375	1.25484	1.72266	2.99386	5.13859	11.7044	36.9141
0.0256393	0.0862391	0.122662	0.132346	0.175515	0.187475	0.208127	0.241224	0.248287	0.2668	0.299784	0.348029	0.363915	0.375263	0.410259	0.492188	0.500215	0.550282	0.61828	0.682134	0.712723	0.778217	0.879131	0.985326	1.25627	1.74015	3.04484	5.17382	11.7497	37.0165
0.0257028	0.0866657	0.122686	0.134681	0.177555	0.188278	0.210905	0.241644	0.249297	0.267358	0.299916	0.348029	0.364089	0.377107	0.413569	0.493719	0.502016	0.550282	0.618837	0.684423	0.714883	0.778217	0.880037	1.0016	1.29222	1.79911	3.08355	5.18972	11.833	37.1481
0.026909	0.0867877	0.123077	0.135415	0.177681	0.190851	0.212118	0.241823	0.249809	0.26807	0.302206	0.348029	0.365955	0.37932	0.41703	0.493751	0.502647	0.550282	0.622468	0.689584	0.718761	0.783871	0.887304	1.01467	1.31668	1.83449	3.08792	5.19135	11.8355	37.3298
0.0272368	0.0877787	0.123395	0.136811	0.177908	0.19149	0.214163	0.241918	0.249878	0.269558	0.303642	0.348029	0.367721	0.380143	0.418362	0.494566	0.503049	0.550282	0.624638	0.690674	0.719887	0.787519	0.887304	1.01467	1.34086	1.96875	3.17508	5.19135	11.8942	37.3926
0.0275485	0.0894564	0.123629	0.136838	0.178174	0.192323	0.21417	0.243071	0.254128	0.271285	0.306194	0.348029	0.368353	0.382866	0.420961	0.495665	0.504998	0.550282	0.630636	0.691565	0.723399	0.789657	0.887304	1.01467	1.36225	1.98407	3.19148	5.19333	11.9644	37.6451
0.0290101	0.0899415	0.124045	0.137271	0.178765	0.193272	0.214475	0.243332	0.254156	0.271794	0.308186	0.348059	0.371405	0.385309	0.425253	0.503618	0.510003	0.550282	0.631645	0.696058	0.727248	0.790866	0.899095	1.01913	1.363	1.98407	3.20867	5.32358	12.0284	37.6652
0.0292531	0.0902367	0.124428	0.13884	0.179063	0.193869	0.214702	0.244952	0.254259	0.272164	0.309806	0.349366	0.372383	0.389031	0.42784	0.505462	0.517355	0.550282	0.633475	0.696058	0.729835	0.79153	0.91059	1.01932	1.37048	1.98407	3.20867	5.3292	12.2183	37.7792
0.0295118	0.0904936	0.124738	0.139901	0.179842	0.195004	0.215551	0.245095	0.260354	0.274688	0.310084	0.350301	0.373811	0.391283	0.432004	0.506238	0.520639	0.550282	0.639144	0.696058	0.731022	0.794423	0.91794	1.03061	1.3913	2.02012	3.20867	5.48604	12.248	37.7982
0.0302828	0.0905048	0.125466	0.140927	0.180055	0.196166	0.216989	0.246094	0.260641	0.280994	0.310868	0.353089	0.374658	0.396211	0.432648	0.508179	0.520902	0.550282	0.642767	0.700708	0.738281	0.798693	0.919975	1.05818	1.39203	2.02934	3.20867	5.52134	12.3587	38.0054
0.030311	0.0905766	0.125904	0.14095	0.180471	0.196661	0.217899	0.246094	0.261271	0.281003	0.313205	0.354958	0.376916	0.396517	0.437141	0.510518	0.521556	0.569997	0.649465	0.70078	0.738281	0.802482	0.930251	1.05879	1.40155	2.08018	3.2833	5.54309	12.4515	38.5394
0.0305234	0.0907978	0.126087	0.141463	0.181237	0.197295	0.218322	0.246094	0.261551	0.283318	0.31324	0.355636	0.37758	0.398058	0.439326	0.510968	0.524733	0.573261	0.649637	0.703709	0.738281	0.816091	0.961421	1.06906	1.41279	2.11769	3.36013	5.62361	12.4539	38.5394
0.0305407	0.0912568	0.12614	0.142842	0.181949	0.197889	0.218472	0.246094	0.262222	0.287211	0.314858	0.35659	0.378929	0.401198	0.441017	0.511437	0.527286	0.581637	0.651223	0.707684	0.738281	0.816483	0.984375	1.0755	1.41385	2.13181	3.36858	5.79236	12.5024	39.1049
0.0317461	0.0921411	0.126912	0.144327	0.182119	0.198167	0.219419	0.246094	0.262458	0.288018	0.315322	0.357146	0.385704	0.402473	0.444228	0.5118	0.527952	0.582797	0.652065	0.719105	0.748019	0.816864	0.984375	1.08497	1.42997	2.20113	3.38925	5.81532	12.7273	39.2665
0.0317857	0.0923476	0.127179	0.145337	0.182709	0.199139	0.219787	0.246094	0.2631	0.288422	0.316645	0.360069	0.392916	0.40547	0.44625	0.514614	0.531035	0.588979	0.661318	0.733111	0.765136	0.817447	0.984375	1.09704	1.44427	2.20113	3.41884	5.83774	12.7447	39.3173
0.0320803	0.0935176	0.127759	0.147231	0.183269	0.199546	0.221957	0.246094	0.266573	0.291031	0.317341	0.360309	0.396079	0.406715	0.449829	0.517162	0.535972	0.591618	0.666644	0.73386	0.765422	0.840189	0.984375	1.15229	1.4559	2.21484	3.41884	6.05311	12.7447	39.3507
0.032409	0.0937824	0.128028	0.147371	0.184028	0.200005	0.22306	0.246094	0.266825	0.291997	0.321462	0.361166	0.399299	0.411857	0.451568	0.519542	0.536578	0.593046	0.667684	0.738281	0.766064	0.840673	0.984375	1.2081	1.47656	2.21484	3.42769	6.05311	12.7852	39.6814
0.0326074	0.0940098	0.128233	0.149799	0.184527	0.201025	0.223185	0.246094	0.26853	0.292391	0.324179	0.364726	0.400518	0.413926	0.464515	0.520721	0.537954	0.607963	0.672671	0.738281	0.773241	0.853996	0.98924	1.21492	1.47656	2.22847	3.5252	6.08802	12.8706	39.756
0.0327991	0.0940172	0.128386	0.151	0.184802	0.201165	0.223806	0.246094	0.269773	0.29864	0.324617	0.368484	0.407509	0.423261	0.465119	0.527006	0.540864	0.622326	0.674724	0.738281	0.777151	0.857597	0.997243	1.22347	1.47656	2.24299	3.56597	6.09444	12.8935	40.0233
0.0334253	0.094025	0.129231	0.151274	0.18497	0.202001	0.224183	0.246094	0.270772	0.29871	0.327019	0.369951	0.408654	0.423358	0.468094	0.527018	0.544065	0.629869	0.675139	0.745037	0.778217	0.864978	1.00308	1.23034	1.47656	2.26887	3.66515	6.19648	13.0453	40.0801
0.0342985	0.0940685	0.130366	0.151735	0.186667	0.204081	0.224479	0.246094	0.27092	0.299158	0.328625	0.371171	0.409067	0.425701	0.472685	0.531894	0.546496	0.634523	0.688588	0.749303	0.778217	0.87718	1.01467	1.23047	1.48046	2.26887	3.68748	6.27418	13.2982	40.3061
0.0349089	0.0964267	0.131402	0.152297	0.186693	0.205039	0.227031	0.246094	0.274903	0.300446	0.3291	0.3825	0.410676	0.428937	0.476083	0.533553	0.547826	0.634966	0.691032	0.750365	0.778217	0.887304	1.01467	1.23047	1.49693	2.32164	3.6996	6.45016	13.5731	40.4252
0.034936	0.0971959	0.133121	0.152637	0.187339	0.207588	0.227304	0.246094	0.277167	0.300456	0.330979	0.384792	0.411812	0.437789	0.490788	0.535859	0.548461	0.635672	0.691706	0.75057	0.781942	0.887304	1.0172	1.23047	1.53339	2.33465	3.79919	6.45175	13.6988	41.2695
0.0354386	0.0986012	0.133654	0.155302	0.187407	0.210951	0.230872	0.246094	0.278661	0.300715	0.333493	0.385811	0.414808	0.4393	0.492188	0.540226	0.550282	0.635717	0.695518	0.750877	0.782428	0.887304	1.0338	1.23047	1.56135	2.34775	3.82154	6.45967	13.7571	41.6911
0.0357042	0.0991328	0.134159	0.157383	0.188771	0.211778	0.230973	0.249042	0.280831	0.303359	0.334438	0.386938	0.42125	0.445414	0.492188	0.54247	0.550282	0.638481	0.696058	0.758323	0.784393	0.887304	1.04257	1.23047	1.57577	2.38855	3.9494	6.49706	14.036	42.0885
0.0361724	0.0998577	0.134386	0.157461	0.190331	0.21275	0.231608	0.249962	0.280853	0.304409	0.336857	0.386948	0.421445	0.447356	0.492188	0.547731	0.550282	0.639321	0.698622	0.764117	0.791176	0.894346	1.05511	1.25484	1.57577	2.41239	3.96814	6.68824	14.0492	42.3396
0.0363871	0.100048	0.134532	0.159467	0.190768	0.21323	0.23231	0.250178	0.283667	0.305063	0.339485	0.388466	0.422247	0.449808	0.492188	0.550282	0.550282	0.639877	0.699747	0.764219	0.793091	0.909023	1.08749	1.25841	1.57691	2.46094	4.04509	6.69447	14.196	42.4824
0.0367047	0.100057	0.134712	0.159647	0.190998	0.213313	0.232399	0.253256	0.284343	0.30727	0.340545	0.38978	0.42468	0.452767	0.492188	0.550282	0.550282	0.639958	0.703627	0.765168	0.796507	0.909393	1.09179	1.25999	1.58506	2.50967	4.04959	6.82258	14.5948	45.6624
0.0367564	0.101169	0.135441	0.160089	0.193177	0.213505	0.233315	0.255267	0.284692	0.310227	0.344428	0.390355	0.425449	0.454187	0.492188	0.550282	0.550282	0.641679	0.704759	0.776077	0.803229	0.912068	1.09622	1.27832	1.72266	2.53369	4.08439	6.84814	14.6545	46.1221
0.0371239	0.102153	0.13756	0.160667	0.19324	0.214849	0.234479	0.25716	0.286248	0.311011	0.348029	0.392412	0.42903	0.45531	0.492188	0.550282	0.550778	0.644064	0.706524	0.778217	0.813396	0.927308	1.09636	1.27927	1.72266	2.53825	4.0936	6.85001	14.6772	46.7578
0.0377287	0.102205	0.138081	0.16117	0.19433	0.215437	0.235656	0.2581	0.288785	0.311087	0.348029	0.393236	0.429531	0.456782	0.492188	0.550282	0.55465	0.64662	0.716627	0.778217	0.815712	0.931403	1.09854	1.28812	1.72266	2.66573	4.10943	6.88658	14.7061	47.1608
0.0377586	0.102243	0.138876	0.161192	0.196348	0.217605	0.236132	0.25813	0.290062	0.312321	0.348029	0.397419	0.432184	0.459366	0.492188	0.550282	0.55465	0.647282	0.717579	0.778217	0.818525	0.931897	1.10272	1.29283	1.74015	2.70703	4.11101	6.94124	15.058	48.13
0.0382155	0.102244	0.13933	0.162274	0.196978	0.218136	0.238158	0.259909	0.290404	0.314765	0.348029	0.397885	0.436566	0.461749	0.492188	0.550282	0.566945	0.655823	0.724916	0.778217	0.820329	0.933014	1.12638	1.31034	1.76402	2.71819	4.11326	7.15367	15.4118	48.3862
0.0383932	0.10305	0.139464	0.164108	0.197289	0.218757	0.239008	0.261165	0.290521	0.317153	0.348029	0.398808	0.437242	0.465723	0.492188	0.550282	0.573793	0.663968	0.731955	0.778217	0.820783	0.984375	1.12701	1.31543	1.77461	2.72857	4.18359	7.1748	15.5117	48.5756
0.038538	0.103234	0.140728	0.164461	0.199303	0.221875	0.240017	0.262692	0.292419	0.324011	0.348029	0.400724	0.443407	0.468459	0.49338	0.550282	0.57659	0.678589	0.734905	0.785527	0.822864	0.984375	1.23047	1.34308	1.77461	2.75141	4.18791	7.1748	15.6594	49.4053
0.039071	0.104827	0.141185	0.165432	0.2006	0.221951	0.241524	0.262825	0.297602	0.324184	0.348029	0.403779	0.448845	0.470532	0.493486	0.550282	0.580959	0.682478	0.737166	0.78818	0.844331	0.984375	1.23047	1.35462	1.79159	2.78423	4.26577	7.22323	15.9411	49.5254
0.0391446	0.10502	0.142125	0.166079	0.201502	0.223936	0.241785	0.265493	0.303047	0.324598	0.348029	0.404309	0.458532	0.47542	0.495118	0.550282	0.582132	0.686029	0.738281	0.789423	0.852213	0.984375	1.23047	1.35566	1.79159	2.78423	4.28913	7.23783	16.0698	49.5407
0.0391848	0.105799	0.142171	0.166678	0.20198	0.225509	0.242431	0.26613	0.304326	0.324952	0.348029	0.404641	0.459957	0.480271	0.495805	0.550282	0.585038	0.68691	0.738281	0.793997	0.872727	0.986346	1.23047	1.35668	1.79159	2.8059	4.33742	7.26137	16.2887	49.6018
0.0392296	0.105858	0.143174	0.166803	0.202463	0.225581	0.244331	0.268424	0.307747	0.327743	0.348029	0.405487	0.46004	0.480746	0.503579	0.550282	0.600867	0.68759	0.738281	0.798033	0.884766	0.989761	1.23047	1.39212	1.81827	2.86705	4.34426	7.52905	16.321	50.4225
0.0392805	0.106739	0.143336	0.167084	0.202511	0.225783	0.245506	0.270361	0.308577	0.332143	0.348029	0.405607	0.463547	0.485426	0.517731	0.552228	0.60588	0.69178	0.738281	0.800647	0.887304	0.992964	1.23047	1.40834	1.8632	2.86992	4.3701	7.5491	16.412	50.4642
0.0407961	0.106906	0.143574	0.168095	0.202659	0.226306	0.245675	0.271255	0.308767	0.332883	0.348029	0.406137	0.469891	0.489911	0.517839	0.55465	0.606321	0.694235	0.738281	0.808556	0.887304	1.01467	1.23047	1.41397	1.87419	2.86992	4.39526	7.6287	16.5706	50.4642
0.0411597	0.107752	0.146632	0.168121	0.20393	0.22636	0.246094	0.271824	0.310489	0.333463	0.348029	0.407404	0.474481	0.491316	0.519262	0.555327	0.611383	0.696058	0.738578	0.809137	0.898331	1.01467	1.23047	1.41669	1.92205	2.88045	4.3954	7.82098	16.6654	50.8175
0.041439	0.107848	0.146712	0.168932	0.204818	0.227547	0.246094	0.271876	0.310528	0.335301	0.348029	0.411097	0.475356	0.492188	0.522451	0.560544	0.61583	0.696058	0.748161	0.824197	0.904842	1.01467	1.2403	1.42504	1.97865	2.88854	4.50332	7.85488	16.738	51.6943
0.0417377	0.107896	0.148379	0.169541	0.204893	0.229751	0.246094	0.274229	0.311317	0.337172	0.348029	0.413757	0.476068	0.492188	0.5236	0.561243	0.616842	0.699722	0.755605	0.832472	0.910654	1.02749	1.24469	1.43496	1.98407	2.90241	4.51308	7.89037	17.0215	51.8271
0.0420414	0.108125	0.148934	0.170854	0.205242	0.229945	0.246094	0.275311	0.312524	0.341596	0.348029	0.413878	0.480028	0.492188	0.528206	0.562073	0.618715	0.704316	0.764251	0.835746	0.931199	1.0286	1.25484	1.43551	1.98407	2.93884	4.56502	7.96694	17.0854	51.9393
0.0436818	0.109189	0.149242	0.173331	0.206641	0.23044	0.246094	0.277269	0.312562	0.343789	0.348982	0.41511	0.480314	0.492188	0.536464	0.56854	0.640005	0.70852	0.771167	0.837016	0.934735	1.03699	1.25484	1.47002	1.98407	2.99887	4.59346	8.01223	17.4468	52.2814
0.0439017	0.109444	0.149264	0.173463	0.207502	0.230929	0.246094	0.277571	0.314516	0.344146	0.3491	0.415862	0.481958	0.492188	0.537116	0.572729	0.6438	0.709821	0.771917	0.837102	0.940327	1.04409	1.25896	1.47656	2.02934	3.00396	4.62368	8.01223	17.4793	53.1742
0.0441841	0.110203	0.150084	0.173469	0.208745	0.231477	0.246094	0.279831	0.316066	0.34462	0.350557	0.417459	0.489683	0.492188	0.537499	0.582953	0.644596	0.712505	0.778217	0.844598	0.945719	1.08245	1.2648	1.47656	2.03367	3.02305	4.69586	8.08952	17.6585	53.8181
0.0443059	0.110502	0.150106	0.173553	0.209829	0.232068	0.246094	0.2802	0.316149	0.346387	0.350791	0.421743	0.491947	0.492188	0.539645	0.583937	0.651072	0.71421	0.778217	0.848392	0.954778	1.10056	1.26633	1.49693	2.07901	3.10421	4.84748	8.18054	17.7001	53.9726
0.044494	0.11061	0.150589	0.176106	0.210526	0.232496	0.246094	0.280541	0.316348	0.348029	0.350791	0.425983	0.492188	0.492188	0.544787	0.586449	0.656451	0.724109	0.778217	0.850665	0.963468	1.10056	1.27047	1.49693	2.09256	3.14304	4.86879	8.53204	17.731	54.2595
0.0446051	0.110663	0.15151	0.176232	0.211728	0.23371	0.246094	0.280583	0.317224	0.348029	0.350931	0.427151	0.492188	0.492188	0.547959	0.58917	0.658569	0.724301	0.783077	0.85642	0.971699	1.12835	1.27345	1.50447	2.10263	3.18002	4.92964	8.61328	17.8731	54.4752
0.0452332	0.110674	0.15199	0.176468	0.214369	0.234441	0.246094	0.282681	0.318093	0.348029	0.351736	0.427706	0.492188	0.499124	0.54871	0.594186	0.664541	0.728531	0.787957	0.861069	0.98041	1.12937	1.27587	1.55064	2.10263	3.19922	5.02257	8.66935	17.9635	54.4891
0.0454336	0.1113	0.152346	0.176804	0.21456	0.236101	0.246094	0.283326	0.320815	0.348029	0.354317	0.428114	0.492188	0.500337	0.550282	0.597512	0.666604	0.729743	0.788183	0.86595	0.984375	1.1324	1.29256	1.55562	2.10592	3.20867	5.10323	8.70073	18.5358	54.8685
0.0456877	0.11239	0.153324	0.177223	0.214671	0.237784	0.246094	0.284257	0.322169	0.348029	0.357541	0.430617	0.492188	0.502629	0.550282	0.598638	0.673918	0.738281	0.790399	0.865964	0.995809	1.13631	1.29605	1.55643	2.11698	3.32967	5.1768	8.76315	18.7018	55.4385
0.0461975	0.113599	0.153442	0.177938	0.216377	0.238716	0.246094	0.28458	0.323682	0.348029	0.357568	0.435539	0.492188	0.505278	0.550282	0.599938	0.678484	0.738281	0.801082	0.867424	1.00609	1.14177	1.30465	1.55643	2.13848	3.34724	5.19867	8.87304	19.102	55.465
0.04629	0.114446	0.153806	0.177939	0.220362	0.238806	0.246094	0.28936	0.329136	0.348029	0.362124	0.43634	0.492188	0.505517	0.550282	0.604892	0.684304	0.738281	0.801332	0.870803	1.0101	1.15525	1.31118	1.55643	2.14508	3.42899	5.22044	8.95795	19.343	55.8105
0.046343	0.114632	0.154506	0.178069	0.221537	0.239026	0.246094	0.29267	0.329304	0.348029	0.367461	0.44668	0.492188	0.513222	0.550282	0.605507	0.694255	0.738281	0.805145	0.871727	1.01467	1.15999	1.31379	1.57287	2.20083	3.43917	5.26088	8.95795	19.5176	56.037
0.0463627	0.114693	0.156349	0.180528	0.223054	0.241074	0.246094	0.292976	0.331263	0.348029	0.369062	0.448479	0.492188	0.517987	0.550282	0.608214	0.694562	0.738479	0.806549	0.872038	1.01467	1.1617	1.32526	1.57577	2.21484	3.47988	5.28594	9.03536	19.9627	56.2039
0.0468047	0.114739	0.156403	0.180714	0.224458	0.241124	0.246094	0.293649	0.333	0.348029	0.36944	0.448723	0.492188	0.519211	0.550282	0.610406	0.696058	0.739173	0.810587	0.882977	1.01467	1.20076	1.32526	1.58785	2.21859	3.52353	5.36944	9.12057	20.1166	56.3469
0.0470169	0.114777	0.157798	0.18094	0.2246	0.242103	0.246094	0.29715	0.333056	0.348029	0.370752	0.449314	0.49399	0.52163	0.550282	0.611882	0.696058	0.740615	0.818347	0.883533	1.02798	1.21571	1.32526	1.61428	2.22847	3.54921	5.41611	9.41932	20.2735	56.9502
0.0476306	0.114949	0.158416	0.181798	0.224969	0.244686	0.246094	0.298125	0.335201	0.348029	0.376136	0.450708	0.495229	0.527006	0.550282	0.615279	0.696058	0.740929	0.819369	0.887304	1.02933	1.23047	1.3291	1.72266	2.22941	3.56016	5.41743	9.51461	20.3483	57.4169
0.0483192	0.115134	0.159383	0.182637	0.226354	0.245223	0.246094	0.299428	0.335646	0.348029	0.37741	0.452275	0.495502	0.531496	0.550282	0.616418	0.696058	0.742899	0.819393	0.887304	1.04409	1.23047	1.33897	1.72266	2.24809	3.57481	5.41856	9.76913	20.3503	57.6091
0.0484631	0.116003	0.159495	0.183259	0.227991	0.246094	0.246094	0.302877	0.336524	0.348029	0.379974	0.45448	0.495715	0.538924	0.550282	0.618356	0.696058	0.744809	0.821361	0.888793	1.05237	1.23843	1.38426	1.77461	2.32164	3.59468	5.41965	9.79464	20.4258	58.0293
0.0486722	0.116634	0.159708	0.183276	0.228411	0.246094	0.246094	0.304247	0.339321	0.349911	0.381571	0.456604	0.497402	0.544985	0.550282	0.619389	0.698991	0.751573	0.833811	0.89255	1.05421	1.25484	1.39033	1.77461	2.33465	3.72758	5.45162	9.85605	20.646	58.3533
0.050264	0.119167	0.159732	0.184268	0.228705	0.246094	0.246094	0.307843	0.339508	0.350385	0.384086	0.457228	0.497425	0.548461	0.550282	0.619911	0.699111	0.756621	0.837102	0.897298	1.05922	1.25484	1.39212	1.79159	2.42374	3.72935	5.50542	9.89897	20.726	59.9277
0.0512236	0.119461	0.161111	0.184384	0.231615	0.246094	0.246094	0.3083	0.341539	0.350791	0.3877	0.457386	0.49985	0.549356	0.558365	0.623352	0.699954	0.757231	0.843279	0.900587	1.05963	1.25484	1.3955	1.80126	2.46094	3.73035	5.53223	9.92036	21.0924	60.0035
0.0519196	0.119543	0.161422	0.184997	0.231715	0.246094	0.246094	0.308662	0.341687	0.353859	0.389108	0.459622	0.505141	0.550282	0.55924	0.625836	0.700521	0.761051	0.848447	0.905083	1.06198	1.25484	1.39756	1.80378	2.46094	3.74436	5.54662	9.98678	21.2234	60.0917
0.0519421	0.119622	0.161777	0.185023	0.232559	0.246094	0.246094	0.31703	0.343153	0.354886	0.389596	0.46062	0.507821	0.550282	0.560556	0.627439	0.701971	0.76465	0.850313	0.915453	1.09038	1.26151	1.40292	1.8245	2.47321	3.75489	5.61641	10.1412	21.2754	60.7125
0.0519755	0.120212	0.162939	0.185303	0.233822	0.246094	0.246472	0.317119	0.347497	0.355318	0.39199	0.462067	0.51078	0.550282	0.566298	0.632162	0.706166	0.765651	0.856967	0.920716	1.09601	1.2616	1.40922	1.85112	2.5048	3.75646	5.62258	10.1503	21.5469	60.9299
0.0527056	0.120335	0.163732	0.186216	0.23401	0.246094	0.248047	0.318435	0.347566	0.356318	0.392227	0.462193	0.510858	0.550282	0.571419	0.638542	0.707019	0.767329	0.862122	0.923105	1.09607	1.28232	1.40982	1.87419	2.53126	3.83837	5.65109	10.2615	21.6031	61.4372
0.052706	0.121493	0.164976	0.186443	0.235053	0.246094	0.248047	0.319199	0.348029	0.35919	0.396138	0.462228	0.512038	0.550282	0.577042	0.638876	0.707591	0.771336	0.868946	0.933729	1.10056	1.28757	1.41815	1.88232	2.53313	3.84051	5.72997	10.305	21.7083	62.1475
0.0527115	0.122286	0.165296	0.186467	0.236354	0.246094	0.248047	0.320082	0.348029	0.361247	0.399523	0.466958	0.517698	0.550282	0.582099	0.64233	0.715565	0.771561	0.874531	0.938814	1.10056	1.28929	1.43211	1.89401	2.53369	3.85722	5.77542	10.4929	21.7859	62.2645
0.0529051	0.123047	0.165791	0.186604	0.236601	0.246094	0.248198	0.320461	0.348029	0.361715	0.400093	0.468008	0.518451	0.550282	0.594062	0.646074	0.71589	0.772745	0.875636	0.947081	1.10056	1.29163	1.43496	1.91191	2.56805	3.86048	5.80357	10.7953	21.8246	62.5808
0.0529172	0.123269	0.165869	0.186644	0.237311	0.246094	0.248312	0.320812	0.348029	0.36312	0.403855	0.470312	0.519349	0.550282	0.594751	0.64721	0.718874	0.776155	0.880879	0.96343	1.10398	1.29256	1.43496	1.92205	2.65802	3.89108	6.03306	10.916	22.025	62.8335
0.0533548	0.125117	0.166673	0.186988	0.237531	0.246094	0.250465	0.323065	0.348029	0.364112	0.404016	0.470481	0.520523	0.550282	0.600687	0.648423	0.72306	0.778217	0.882598	0.984375	1.16671	1.30373	1.4411	1.92205	2.70659	3.94518	6.05761	10.9253	22.2535	63.0788
0.0535388	0.125118	0.166998	0.188406	0.237998	0.246094	0.253324	0.325497	0.348029	0.364227	0.407581	0.474103	0.523732	0.551334	0.606774	0.651657	0.723421	0.778217	0.886497	0.984375	1.16982	1.31622	1.4471	1.95179	2.71819	3.94518	6.12376	10.9734	22.2847	64.8906
0.0536484	0.125277	0.167331	0.1885	0.238473	0.246094	0.253478	0.325531	0.348029	0.364276	0.411594	0.476555	0.525838	0.55167	0.608999	0.658918	0.731236	0.778217	0.887304	0.984375	1.17697	1.31776	1.45527	1.95291	2.71819	3.96814	6.15234	10.9891	22.4647	65.666
0.0548078	0.125455	0.167709	0.188735	0.239352	0.246094	0.254136	0.327774	0.348029	0.368045	0.414271	0.480304	0.527006	0.552335	0.611798	0.660086	0.732271	0.778217	0.887304	0.984375	1.18682	1.32526	1.47656	1.96875	2.75141	3.96814	6.172	11.0194	22.6016	65.7697
0.0558401	0.126026	0.167913	0.189034	0.24003	0.246094	0.254236	0.329915	0.348029	0.370524	0.415168	0.480927	0.527207	0.552443	0.61269	0.668058	0.733977	0.780479	0.887304	0.984375	1.2062	1.32526	1.47656	1.96875	2.75141	4.00612	6.20729	11.0605	22.6887	65.8157
0.056283	0.126792	0.168153	0.189187	0.240123	0.246094	0.254593	0.331466	0.348029	0.371248	0.415291	0.484388	0.52871	0.55465	0.61375	0.668348	0.734141	0.785727	0.887304	0.984375	1.22007	1.34174	1.47656	1.98407	2.8059	4.03791	6.33221	11.2908	22.7091	66.5933
0.0567218	0.127268	0.170356	0.190957	0.241809	0.246094	0.256489	0.333298	0.348029	0.372595	0.415884	0.487194	0.531037	0.560643	0.622712	0.669567	0.734512	0.792893	0.898514	0.986163	1.23047	1.3519	1.4783	1.98407	2.8059	4.0453	6.41734	11.3171	23.1825	66.6955
0.0572468	0.127879	0.171425	0.192049	0.241877	0.246094	0.257391	0.336015	0.348029	0.37377	0.416371	0.487938	0.536469	0.561292	0.627418	0.675307	0.738281	0.797445	0.905098	0.992188	1.23047	1.35901	1.48986	1.98407	2.82522	4.0662	6.44089	11.3174	23.5274	67.317
0.0574123	0.127965	0.17151	0.192447	0.243943	0.246094	0.257987	0.337877	0.348029	0.374532	0.416469	0.490314	0.537136	0.564024	0.632594	0.675515	0.738281	0.798611	0.908541	0.992188	1.23047	1.36716	1.49693	1.98407	2.82656	4.09088	6.51568	11.331	23.5801	67.7093
0.0575104	0.128029	0.171909	0.192573	0.245345	0.246094	0.262588	0.338512	0.348029	0.375178	0.417056	0.492188	0.538013	0.575235	0.634516	0.677464	0.738281	0.79908	0.915862	0.992599	1.23047	1.37007	1.52348	1.99921	2.86156	4.1275	6.54403	11.4401	23.7388	67.7205
0.0575229	0.12834	0.172708	0.195176	0.246094	0.246094	0.263702	0.338742	0.348477	0.376831	0.41747	0.492188	0.538929	0.580681	0.634967	0.678415	0.738281	0.800067	0.922909	0.993993	1.23047	1.37349	1.54998	2.01289	2.88045	4.1409	6.71705	11.6055	23.8749	68.3433
0.057534	0.129491	0.173883	0.195548	0.246094	0.246094	0.263907	0.341701	0.350595	0.37731	0.419994	0.492188	0.541119	0.585623	0.638432	0.680792	0.738281	0.80178	0.923138	1.01343	1.23047	1.38206	1.55589	2.02934	2.88189	4.15628	6.7517	11.696	23.8825	69.0226
0.0593955	0.129547	0.173994	0.195624	0.246094	0.246094	0.264148	0.342532	0.354774	0.380167	0.423574	0.492188	0.543625	0.585684	0.63933	0.681536	0.742523	0.802931	0.923562	1.01467	1.23047	1.39024	1.55643	2.02934	2.91835	4.18257	6.7575	11.715	23.8863	69.1804
0.059513	0.130546	0.17483	0.195892	0.246094	0.246094	0.264353	0.342686	0.356841	0.389759	0.423893	0.492188	0.544238	0.585883	0.640062	0.68398	0.743246	0.805962	0.934923	1.01467	1.24471	1.39212	1.56078	2.04989	2.96336	4.18384	6.77022	11.7328	23.9938	69.2679
0.0595701	0.131396	0.174941	0.196109	0.246094	0.246094	0.264416	0.343059	0.357579	0.391439	0.429894	0.492188	0.550282	0.592644	0.642766	0.685066	0.748006	0.806689	0.945354	1.01467	1.25484	1.39212	1.56721	2.09519	2.96336	4.20357	6.77945	11.7534	23.9963	69.2788
0.0597462	0.132046	0.1759	0.196456	0.246094	0.246094	0.264457	0.344263	0.35782	0.39163	0.429945	0.492188	0.550282	0.59382	0.644362	0.686405	0.751192	0.807009	0.957231	1.01467	1.25484	1.40128	1.57577	2.10263	2.97023	4.28114	6.85538	11.8227	24.0165	69.3006
0.0598418	0.133409	0.176438	0.196512	0.246094	0.246094	0.265426	0.345427	0.357859	0.393599	0.432757	0.492188	0.550282	0.595033	0.646107	0.689968	0.75555	0.81716	0.958739	1.01797	1.25484	1.41185	1.57577	2.11166	2.97356	4.35109	6.99963	11.8227	24.3952	69.4752
0.0599668	0.133475	0.178301	0.196594	0.246094	0.246094	0.2657	0.347283	0.358206	0.397446	0.434344	0.492188	0.550282	0.595238	0.648184	0.690371	0.760519	0.821243	0.959468	1.02135	1.25484	1.429	1.57945	2.11348	2.97653	4.36294	7.00803	11.8602	24.4388	69.6058
0.0600117	0.133558	0.178754	0.197091	0.246094	0.246094	0.266296	0.348029	0.358587	0.398074	0.443683	0.493054	0.550282	0.596246	0.648279	0.692299	0.763819	0.824904	0.966097	1.02416	1.27847	1.43006	1.60457	2.12999	2.98738	4.36335	7.05135	11.8866	24.441	71.0276
0.0601139	0.134669	0.179229	0.197415	0.246094	0.246094	0.267764	0.348029	0.358805	0.399217	0.444208	0.493553	0.550282	0.598077	0.648484	0.692349	0.775448	0.825051	0.983367	1.03418	1.29129	1.43496	1.61096	2.13234	3.00909	4.46934	7.09843	11.8942	24.4706	72.5035
0.0602214	0.135272	0.179877	0.200401	0.246094	0.246094	0.269024	0.348029	0.36064	0.400829	0.445695	0.495586	0.550282	0.599308	0.653719	0.695793	0.778217	0.839333	0.984375	1.04153	1.29418	1.43496	1.65085	2.20867	3.07017	4.49408	7.10147	12.0007	24.875	72.8787
0.060299	0.135991	0.179975	0.201687	0.246094	0.246094	0.269785	0.348029	0.361145	0.401213	0.446931	0.496094	0.550282	0.60022	0.657812	0.696058	0.778217	0.849598	0.984375	1.04409	1.29558	1.43496	1.65688	2.26887	3.09626	4.53182	7.14577	12.0284	25.0627	73.0965
0.0605142	0.136397	0.18103	0.204558	0.246094	0.246257	0.27061	0.348029	0.363071	0.404635	0.448507	0.496808	0.550282	0.609406	0.658216	0.696058	0.778217	0.859028	0.984375	1.04409	1.30435	1.43517	1.65734	2.26887	3.20539	4.63656	7.28044	12.1332	25.2615	73.1068
0.0605302	0.137131	0.181147	0.204835	0.246094	0.246281	0.273369	0.348029	0.365455	0.406291	0.449723	0.498382	0.550282	0.614056	0.658415	0.696058	0.778217	0.861938	0.984375	1.05126	1.31728	1.43909	1.72266	2.27641	3.20575	4.64568	7.28787	12.176	25.7035	74.1433
0.0608367	0.138322	0.182004	0.205289	0.246094	0.246619	0.274217	0.348029	0.365811	0.407959	0.451113	0.498889	0.550282	0.624505	0.661662	0.696058	0.778217	0.86374	0.984375	1.05341	1.32526	1.45895	1.72266	2.29563	3.24085	4.70161	7.28787	12.3071	25.7553	74.5729
0.0609102	0.138376	0.182322	0.205939	0.246094	0.248047	0.275775	0.348029	0.366052	0.410355	0.451768	0.502148	0.550282	0.624514	0.662138	0.696058	0.778217	0.86411	0.985212	1.0675	1.32526	1.47656	1.74015	2.4036	3.30801	4.75286	7.3746	12.393	25.7871	75.071
0.0609113	0.138733	0.183046	0.206066	0.246094	0.248611	0.279817	0.348029	0.367164	0.41163	0.453705	0.503157	0.550282	0.626681	0.663804	0.696058	0.778217	0.865512	0.990782	1.08567	1.32526	1.47656	1.74015	2.42374	3.3279	4.7811	7.41963	12.5024	25.7871	75.4201
0.0609203	0.13895	0.183105	0.207083	0.246094	0.24879	0.28088	0.348029	0.368633	0.411848	0.456691	0.512111	0.550282	0.631907	0.665956	0.696058	0.782952	0.868305	0.993544	1.10056	1.3449	1.47656	1.74125	2.4362	3.36592	4.78954	7.4725	12.6022	25.9334	76.1176
0.0609385	0.139664	0.183497	0.207492	0.246094	0.249703	0.284603	0.348029	0.370279	0.412278	0.457187	0.51581	0.550282	0.638182	0.666468	0.696214	0.784393	0.875928	0.997448	1.1093	1.35518	1.47656	1.74777	2.44594	3.42489	4.83075	7.48465	12.6082	25.936	76.5614
0.0609776	0.13985	0.185075	0.208741	0.246094	0.254354	0.2881	0.348029	0.373552	0.415373	0.45768	0.523557	0.552233	0.64311	0.668423	0.696718	0.788786	0.886234	1.01467	1.1135	1.36026	1.48904	1.77461	2.46094	3.45409	4.83624	7.53304	12.7708	26.2955	76.7343
0.0610238	0.140036	0.185664	0.209059	0.246094	0.255274	0.289226	0.348029	0.377622	0.415485	0.459812	0.525626	0.55465	0.645228	0.668847	0.699566	0.795303	0.887304	1.01467	1.11422	1.36858	1.49693	1.77461	2.46094	3.46696	4.87335	7.63287	12.8182	26.4009	77.0592
0.0615225	0.140394	0.185895	0.209726	0.246094	0.25639	0.291618	0.348029	0.379345	0.418305	0.460521	0.527089	0.55674	0.646675	0.673362	0.702179	0.797129	0.887304	1.01467	1.13316	1.3767	1.49693	1.79159	2.52003	3.48225	4.90599	7.66455	12.9941	26.6243	77.2946
0.0617594	0.141553	0.185903	0.210115	0.246094	0.256432	0.292162	0.348029	0.381508	0.419791	0.462204	0.52848	0.558167	0.648307	0.675093	0.703148	0.80277	0.887304	1.01467	1.13399	1.38604	1.50409	1.80581	2.52959	3.49637	4.9423	7.69215	13.0523	26.7396	77.8703
0.0619161	0.141597	0.186723	0.210251	0.246094	0.256443	0.295237	0.348029	0.381538	0.420247	0.46304	0.529007	0.558364	0.648979	0.677931	0.705988	0.80732	0.887304	1.01467	1.14004	1.39212	1.50641	1.84154	2.53876	3.53657	4.95471	7.70145	13.153	26.7428	78.1446
0.0620363	0.141677	0.188197	0.211726	0.246094	0.256615	0.295297	0.348029	0.381765	0.42069	0.465681	0.532696	0.562571	0.649372	0.679048	0.709683	0.813067	0.887304	1.01467	1.14662	1.39212	1.51087	1.84215	2.54101	3.55706	4.96973	7.73107	13.2631	26.8242	78.4804
0.0620431	0.142536	0.188354	0.212676	0.246094	0.258605	0.296733	0.349666	0.382215	0.424539	0.466698	0.533689	0.564727	0.650063	0.68301	0.71157	0.813592	0.887304	1.02089	1.15504	1.39488	1.51972	1.84677	2.5571	3.56552	4.98302	7.80781	13.3652	26.8287	78.5052
0.0621936	0.142879	0.188655	0.213424	0.246094	0.25904	0.297717	0.349961	0.384836	0.430313	0.467163	0.534344	0.566062	0.650964	0.684648	0.715707	0.822533	0.887304	1.02965	1.15909	1.41764	1.52803	1.86037	2.59824	3.65845	4.99457	7.91224	13.4093	26.9107	78.5189
0.062904	0.143111	0.188925	0.215261	0.246094	0.259138	0.298489	0.350791	0.385156	0.431202	0.470769	0.538114	0.576854	0.656835	0.684775	0.715725	0.823338	0.887948	1.03519	1.16529	1.4184	1.54166	1.86521	2.6574	3.68003	5.05964	8.01223	13.5066	27.0983	78.7709
0.0635308	0.143799	0.189251	0.217682	0.246094	0.259635	0.299111	0.351817	0.385922	0.435545	0.470972	0.538276	0.577251	0.6591	0.689326	0.716424	0.828111	0.889819	1.03749	1.19256	1.42356	1.54612	1.8786	2.71819	3.69141	5.07018	8.02297	13.5709	27.1574	78.8108
0.0651309	0.145272	0.189479	0.219031	0.246094	0.25969	0.301376	0.352434	0.386796	0.436847	0.471191	0.539884	0.578296	0.666624	0.696058	0.728927	0.829746	0.890401	1.03915	1.20678	1.43496	1.55631	1.88179	2.72264	3.6996	5.17937	8.02697	13.591	27.4033	78.9133
0.0654371	0.145305	0.189539	0.219074	0.246094	0.26095	0.304982	0.352806	0.387609	0.43839	0.47174	0.550282	0.579041	0.671724	0.696058	0.735705	0.832864	0.896848	1.04409	1.21036	1.43496	1.57004	1.92205	2.74295	3.722	5.19728	8.18054	13.591	27.7203	79.0953
0.0655324	0.14534	0.189682	0.22105	0.246094	0.261147	0.305229	0.354105	0.387907	0.440308	0.4719	0.550282	0.579351	0.674327	0.696058	0.738281	0.834287	0.902323	1.04849	1.21716	1.44121	1.5757	1.93048	2.7537	3.7521	5.20205	8.1893	14.2819	27.9476	79.1814
0.0656432	0.14622	0.189817	0.221712	0.246094	0.261303	0.307161	0.35507	0.388567	0.441326	0.472023	0.550282	0.580092	0.676006	0.697052	0.738281	0.836358	0.904103	1.05036	1.22794	1.44933	1.57577	1.93433	2.7645	3.76451	5.23871	8.19163	14.4945	27.9563	79.296
0.0656454	0.147306	0.19166	0.221939	0.246094	0.262476	0.307758	0.355144	0.391837	0.443374	0.473994	0.550282	0.580828	0.676815	0.700723	0.738281	0.838995	0.918259	1.05346	1.23047	1.4584	1.60171	1.96875	2.78892	3.77689	5.53007	8.21762	14.7333	28.3521	79.9852
0.0657334	0.147327	0.192188	0.221973	0.246094	0.262763	0.308615	0.35527	0.399013	0.444476	0.478312	0.550282	0.58421	0.678907	0.701583	0.738281	0.841335	0.930047	1.07227	1.23047	1.47656	1.60825	1.97403	2.8059	3.78409	5.54247	8.22483	14.9014	28.5875	80.0696
0.0662556	0.147335	0.194667	0.22286	0.246094	0.264759	0.311531	0.35582	0.399066	0.445669	0.481038	0.550282	0.584546	0.679134	0.703974	0.738281	0.842938	0.946916	1.08267	1.23047	1.47656	1.612	1.97928	2.86992	3.89625	5.54574	8.25424	14.9015	28.6168	80.4388
0.0662573	0.147996	0.195679	0.223496	0.246094	0.267108	0.312169	0.35817	0.399462	0.44787	0.481137	0.550282	0.584873	0.67922	0.705928	0.738281	0.846499	0.95225	1.08329	1.23047	1.47656	1.62232	1.98407	2.87663	3.94303	5.57373	8.30179	14.9632	28.7171	80.5464
0.066682	0.148583	0.196292	0.226509	0.246709	0.268018	0.312349	0.358804	0.399733	0.44796	0.487601	0.550282	0.594834	0.681026	0.70604	0.738281	0.847021	0.959868	1.09309	1.25421	1.49047	1.63093	1.98407	2.88894	3.96649	5.62105	8.30179	14.9693	29.1026	80.6121
0.0669159	0.149313	0.196295	0.227633	0.247025	0.268149	0.313655	0.361816	0.39989	0.449721	0.490002	0.550282	0.595574	0.682451	0.707788	0.738281	0.848313	0.966039	1.09627	1.25484	1.49693	1.63866	1.98407	2.89011	3.989	5.64624	8.38165	15.2484	29.1276	80.6215
0.0677667	0.15082	0.196653	0.2285	0.247362	0.268248	0.314231	0.363218	0.401924	0.45191	0.490449	0.550282	0.599896	0.682662	0.711974	0.740797	0.854625	0.974193	1.10056	1.25484	1.49693	1.6402	1.98407	2.94243	4.00344	5.66016	8.61328	15.3764	29.2365	81.2948
0.0681974	0.151663	0.197206	0.228682	0.248255	0.271908	0.316032	0.367601	0.401999	0.453276	0.492188	0.550282	0.601096	0.683078	0.713574	0.741455	0.861984	0.976061	1.10056	1.25484	1.5171	1.64273	2.02345	2.96408	4.0213	5.68144	8.79419	15.6191	29.751	81.4808
0.0682289	0.152578	0.198121	0.228991	0.248271	0.273098	0.316658	0.368789	0.403504	0.454093	0.492188	0.550282	0.60473	0.688755	0.71724	0.749073	0.869619	0.97652	1.10056	1.25484	1.52235	1.64877	2.02934	2.96513	4.0286	5.68392	8.82941	15.6613	29.7895	82.2418
0.0686197	0.152579	0.198874	0.229086	0.248804	0.273286	0.317302	0.369417	0.403734	0.455156	0.492188	0.550282	0.604868	0.689057	0.719087	0.75763	0.871748	0.976553	1.10056	1.25484	1.54633	1.65085	2.02934	2.97023	4.03305	5.7421	9.02866	15.7678	29.7965	82.7256
0.0686254	0.153215	0.200184	0.231986	0.253904	0.273642	0.318906	0.369973	0.406085	0.456161	0.492188	0.550282	0.60797	0.68944	0.72374	0.762625	0.876745	0.977648	1.10398	1.25484	1.55494	1.65085	2.06731	2.99386	4.11032	5.79236	9.09098	15.8433	30.0849	83.7081
0.0690297	0.153915	0.200199	0.232642	0.256909	0.274265	0.319423	0.37096	0.406725	0.456247	0.492188	0.550282	0.608309	0.693954	0.729517	0.76749	0.887296	0.984375	1.11757	1.25484	1.55598	1.65085	2.06734	2.99386	4.17635	5.79299	9.10707	15.8472	30.3854	85.6215
0.0694198	0.154674	0.202942	0.233376	0.260035	0.27475	0.319875	0.371011	0.411006	0.4563	0.492188	0.550282	0.611689	0.694287	0.732896	0.774311	0.887304	0.984375	1.12354	1.26297	1.55643	1.6584	2.0786	3.0311	4.20251	5.79798	9.31588	15.9126	30.6343	85.7099
0.0695594	0.155166	0.204486	0.233947	0.2601	0.274981	0.323462	0.372845	0.411399	0.45944	0.492188	0.550282	0.613013	0.696058	0.733393	0.775711	0.887304	0.990615	1.13485	1.2681	1.55643	1.66769	2.08817	3.03984	4.20947	5.80053	9.3386	16.0245	30.6937	86.4827
0.0702786	0.155719	0.204993	0.236748	0.260538	0.276563	0.324185	0.373375	0.414294	0.463692	0.492188	0.550282	0.625428	0.696058	0.738281	0.776189	0.887304	0.992079	1.14109	1.27664	1.56361	1.6687	2.10263	3.04163	4.2167	5.84857	9.42465	16.1599	30.7425	86.5624
0.0708059	0.155745	0.205221	0.236878	0.261262	0.278257	0.324342	0.374708	0.414427	0.464421	0.492188	0.550282	0.628336	0.696058	0.738281	0.778217	0.887304	0.997918	1.15825	1.27902	1.56968	1.69398	2.10263	3.06781	4.2251	5.88033	9.49935	16.2096	31.1695	86.9153
0.0709043	0.156019	0.205295	0.237465	0.262024	0.27842	0.325501	0.376973	0.418125	0.464572	0.492188	0.550282	0.628536	0.696058	0.738281	0.778217	0.887304	1.00534	1.16051	1.29478	1.57513	1.69837	2.15678	3.10469	4.23863	5.89601	9.57238	16.2887	31.9199	89.5353
0.0710877	0.157507	0.205364	0.237665	0.263385	0.2792	0.329408	0.377124	0.419197	0.466624	0.492188	0.550282	0.637399	0.696058	0.738281	0.778217	0.887304	1.01253	1.16212	1.31291	1.57577	1.72266	2.19802	3.11287	4.25428	5.94295	9.69809	16.3579	32.0206	89.959
0.0714683	0.15879	0.205621	0.241034	0.263439	0.280844	0.329987	0.37793	0.419986	0.466985	0.492188	0.552283	0.638489	0.6977	0.738281	0.778217	0.887304	1.01467	1.16231	1.31694	1.57577	1.74015	2.22847	3.20867	4.30511	5.99131	9.71057	16.5076	32.0348	90.1187
0.071692	0.158919	0.205695	0.241523	0.263639	0.28188	0.330504	0.379422	0.423844	0.466993	0.492188	0.552581	0.639171	0.701583	0.738281	0.778217	0.887304	1.01467	1.16461	1.32208	1.5762	1.74015	2.23371	3.23686	4.32477	5.99277	9.90814	16.5321	32.2922	90.2866
0.0722323	0.159365	0.20654	0.241808	0.263719	0.28386	0.333417	0.379668	0.426157	0.468503	0.492188	0.552641	0.640192	0.706175	0.738281	0.778217	0.887304	1.01467	1.16529	1.32488	1.58323	1.74015	2.23478	3.23686	4.33638	5.99277	9.9314	16.5396	32.5179	90.5043
0.0729719	0.160028	0.206839	0.242093	0.264598	0.285829	0.334684	0.38029	0.427418	0.468797	0.49344	0.552654	0.644245	0.708961	0.738747	0.778217	0.893583	1.01467	1.17406	1.32526	1.5838	1.76081	2.26887	3.25507	4.38157	6.00688	9.95388	16.5618	32.7522	92.1477
0.0736253	0.160121	0.206955	0.242259	0.266517	0.287212	0.334766	0.382099	0.428038	0.471027	0.494438	0.55397	0.644857	0.709394	0.744141	0.782235	0.893602	1.01467	1.17418	1.32526	1.58826	1.77461	2.26887	3.27004	4.39672	6.00773	9.98678	16.665	32.7785	92.2195
0.0740053	0.160713	0.207882	0.24239	0.267109	0.287423	0.336829	0.385474	0.43003	0.471334	0.496094	0.55465	0.645706	0.7132	0.745913	0.78431	0.900807	1.01467	1.17976	1.32526	1.58827	1.77734	2.26887	3.27855	4.41576	6.14373	10.0288	16.738	32.9073	92.6372
0.0740135	0.160909	0.207968	0.243865	0.267903	0.287714	0.345106	0.38567	0.430557	0.471993	0.496094	0.55465	0.649133	0.727032	0.748402	0.785581	0.901653	1.01467	1.18916	1.32526	1.58916	1.77862	2.26887	3.36582	4.4454	6.15234	10.1168	16.7723	32.9472	93.2725
0.0743884	0.163075	0.208117	0.244837	0.268249	0.288602	0.345707	0.386153	0.431517	0.475626	0.496297	0.559719	0.651782	0.732016	0.748438	0.786151	0.906959	1.01467	1.19299	1.37377	1.58953	1.78496	2.28854	3.37742	4.45695	6.172	10.1467	16.8428	33.0513	93.5452
0.0744942	0.164155	0.208213	0.245119	0.26909	0.293892	0.348029	0.387233	0.43363	0.480191	0.497924	0.563831	0.657644	0.73646	0.751914	0.78738	0.91015	1.01467	1.21198	1.39212	1.59019	1.79159	2.29166	3.38212	4.46891	6.21113	10.1973	16.9519	33.2154	93.9679
0.0745913	0.164537	0.209235	0.245957	0.269275	0.294645	0.348029	0.390403	0.435835	0.482431	0.500149	0.566781	0.658006	0.737275	0.755491	0.788248	0.916585	1.01855	1.22892	1.39212	1.6106	1.81795	2.32164	3.40097	4.47141	6.21923	10.2204	16.952	33.2276	94.9935
0.0752162	0.164633	0.20945	0.246094	0.270178	0.295656	0.348029	0.391026	0.437733	0.48258	0.503608	0.567922	0.661911	0.737504	0.764099	0.793812	0.926584	1.01937	1.23047	1.39833	1.63075	1.86583	2.32164	3.40316	4.50613	6.38897	10.3617	17.1075	33.2836	95.3276
0.0752536	0.164684	0.210435	0.246094	0.27195	0.296227	0.348029	0.391303	0.438499	0.483323	0.504273	0.570426	0.669155	0.738281	0.766662	0.800416	0.9314	1.0408	1.23047	1.41438	1.63261	1.89729	2.32292	3.44261	4.53774	6.45967	10.4719	17.1102	33.3091	95.6992
0.0760653	0.165352	0.210984	0.246094	0.272117	0.296492	0.348029	0.391985	0.439418	0.485042	0.504427	0.575836	0.669296	0.738281	0.770809	0.800735	0.932663	1.04409	1.23047	1.4238	1.64175	1.8994	2.39412	3.44531	4.55992	6.47372	10.5196	17.2705	33.4961	96.7699
0.0762135	0.165365	0.211196	0.246094	0.273933	0.296577	0.348029	0.392382	0.443441	0.485055	0.5072	0.578793	0.670242	0.738281	0.771336	0.804751	0.93342	1.04409	1.24366	1.43496	1.64998	1.90882	2.42207	3.48029	4.57048	6.49706	10.5814	17.4183	33.6348	96.8638
0.0764289	0.165674	0.212382	0.246094	0.274183	0.297082	0.348029	0.392407	0.445213	0.492188	0.50756	0.578875	0.671908	0.738281	0.771336	0.806107	0.933809	1.04409	1.24766	1.43496	1.65085	1.92205	2.46094	3.48029	4.58218	6.5666	10.6476	17.431	33.6387	97.8358
0.0769267	0.166557	0.213346	0.246094	0.274235	0.29713	0.348029	0.393283	0.453166	0.492188	0.507887	0.578933	0.671994	0.738281	0.776207	0.811122	0.937097	1.04693	1.25022	1.43496	1.65085	1.92205	2.4667	3.49662	4.58437	6.57922	10.6678	17.4353	33.783	98.076
0.0770377	0.167122	0.213764	0.246094	0.274747	0.297543	0.348029	0.393587	0.454167	0.492188	0.508002	0.580343	0.677758	0.738281	0.778217	0.820042	0.960739	1.05534	1.25484	1.43496	1.65406	1.96332	2.47814	3.51057	4.63894	6.60073	10.676	17.5927	33.8225	98.6296
0.077175	0.167224	0.214745	0.246094	0.275723	0.298033	0.348029	0.394282	0.454949	0.492188	0.517203	0.585305	0.678229	0.738281	0.778217	0.822126	0.961075	1.07288	1.25484	1.44824	1.66395	1.96365	2.48429	3.52745	4.6508	6.65496	10.6846	17.6454	33.8572	98.6669
0.0778214	0.167539	0.214905	0.246094	0.277372	0.299354	0.348029	0.395374	0.455828	0.492188	0.517616	0.587851	0.683756	0.738281	0.778217	0.824383	0.967417	1.09359	1.25484	1.4725	1.66601	1.96875	2.49284	3.53549	4.70567	6.69447	10.7213	17.911	33.9462	101.713
0.0778786	0.16778	0.216803	0.246094	0.280886	0.300039	0.348029	0.396543	0.458146	0.492188	0.521177	0.591402	0.685983	0.738281	0.778217	0.824626	0.972391	1.09786	1.25484	1.47656	1.67194	1.96875	2.59192	3.54418	4.74916	6.70918	10.7439	17.98	34.092	102.366
0.0784298	0.168117	0.218146	0.246094	0.281039	0.302766	0.348029	0.401071	0.458225	0.492188	0.52238	0.5915	0.690798	0.738281	0.778217	0.827283	0.974789	1.10056	1.25484	1.47656	1.68486	1.96875	2.62145	3.55149	4.75286	6.72156	10.895	17.9856	34.2203	104.423
0.0786563	0.168263	0.218497	0.246094	0.281331	0.302918	0.348029	0.401215	0.458948	0.492188	0.52285	0.592239	0.696058	0.738281	0.778217	0.828231	0.977564	1.10056	1.25605	1.47656	1.68848	1.98407	2.66191	3.55313	4.7947	6.82439	10.9012	18.0099	34.2678	104.99
0.0786959	0.168369	0.218656	0.246094	0.283397	0.304799	0.348029	0.401348	0.459277	0.492188	0.524183	0.59676	0.696058	0.741187	0.778217	0.831244	0.984375	1.10056	1.2648	1.48077	1.69917	2.02934	2.6627	3.60916	4.84321	6.94862	10.9209	18.0254	34.3448	105.059
0.0792966	0.168548	0.218876	0.246094	0.284029	0.307674	0.348029	0.402296	0.461014	0.492188	0.524444	0.599633	0.696058	0.743071	0.778217	0.832679	0.989911	1.10056	1.2648	1.48462	1.70297	2.02934	2.66695	3.63782	4.84443	6.96058	10.9371	18.3385	34.4236	105.706
0.0796299	0.168686	0.219026	0.246094	0.284366	0.30917	0.348029	0.402781	0.462756	0.492188	0.526551	0.601237	0.696058	0.749215	0.778875	0.833199	0.99082	1.10056	1.27621	1.48534	1.7172	2.03778	2.68304	3.65845	4.89003	6.96058	10.9864	18.7533	34.4399	107.213
0.0802455	0.169622	0.219125	0.246094	0.284445	0.3108	0.348029	0.403043	0.464655	0.492188	0.527006	0.606003	0.696058	0.750807	0.779798	0.838627	0.996234	1.10056	1.2769	1.49017	1.72266	2.03819	2.69678	3.65845	4.92057	6.99618	11.0605	18.8065	34.5795	108.568
0.0806876	0.170628	0.219456	0.246094	0.284555	0.314632	0.348029	0.404177	0.465134	0.492188	0.532785	0.606196	0.696058	0.753393	0.783548	0.840181	1.01467	1.10056	1.29629	1.496	1.72266	2.10263	2.73912	3.68593	5.01151	7.00395	11.2283	18.8392	34.7071	110.103
0.0810148	0.170928	0.219481	0.246094	0.285344	0.316472	0.348029	0.408537	0.465302	0.492188	0.533271	0.609393	0.700529	0.757268	0.786151	0.840594	1.01467	1.10897	1.30159	1.49693	1.72266	2.10263	2.75866	3.69141	5.01634	7.11914	11.2908	18.8574	34.7071	110.51
0.0812956	0.171556	0.219758	0.246094	0.285879	0.316532	0.349524	0.409206	0.465895	0.492188	0.533545	0.609724	0.701583	0.757492	0.788724	0.846692	1.01467	1.1093	1.32158	1.49912	1.72266	2.11372	2.78274	3.8207	5.04358	7.18745	11.3239	18.9748	35.2372	110.776
0.0813727	0.171674	0.221073	0.246094	0.286192	0.317574	0.349594	0.409418	0.466664	0.492188	0.533752	0.610966	0.701583	0.75858	0.7954	0.849856	1.01467	1.1093	1.32526	1.50154	1.73524	2.11698	2.79317	3.83327	5.05483	7.23156	11.3444	19.0639	35.2567	111.267
0.0816539	0.171934	0.221554	0.246094	0.28628	0.317955	0.349704	0.410247	0.467138	0.492268	0.536369	0.611167	0.701971	0.759176	0.79569	0.850317	1.01467	1.11086	1.32526	1.50376	1.74015	2.11698	2.80747	3.84358	5.0895	7.23783	11.3504	19.102	35.3288	112.405
0.0824345	0.171973	0.221679	0.246094	0.287798	0.318068	0.350169	0.4109	0.470244	0.496094	0.536412	0.615634	0.706076	0.76481	0.79594	0.854211	1.01467	1.11963	1.32526	1.50385	1.75008	2.11698	2.81956	3.88214	5.09233	7.25333	11.5352	19.1646	35.4409	112.62
0.0827527	0.172923	0.223248	0.246094	0.288143	0.318495	0.350298	0.415649	0.471257	0.496094	0.537403	0.617143	0.710189	0.766185	0.807159	0.874437	1.01467	1.12117	1.33146	1.50669	1.76965	2.11698	2.84213	3.89108	5.13859	7.28787	11.5559	19.2787	35.495	114.009
0.0832104	0.173256	0.223373	0.246094	0.288209	0.320698	0.350791	0.416033	0.472651	0.503594	0.539834	0.618051	0.718788	0.770571	0.812879	0.878899	1.01467	1.14192	1.34554	1.53588	1.78188	2.12082	2.85688	3.92951	5.21463	7.41963	11.569	19.3983	35.6462	114.599
0.0832446	0.173606	0.223494	0.246094	0.288353	0.321001	0.350791	0.416973	0.473377	0.504323	0.540626	0.621978	0.723879	0.771336	0.81428	0.882015	1.01467	1.14311	1.35964	1.53831	1.78352	2.12146	2.88045	3.94518	5.23255	7.41963	11.6082	19.5545	35.659	114.856
0.083286	0.174316	0.224221	0.246094	0.288462	0.321133	0.350791	0.420741	0.474962	0.505312	0.540865	0.621997	0.727119	0.771875	0.81541	0.885577	1.01567	1.15618	1.36558	1.55191	1.78793	2.13818	2.9041	3.96451	5.26664	7.42668	11.6082	19.6135	35.7482	119.374
0.0838443	0.174391	0.224823	0.246094	0.289237	0.321472	0.353314	0.420787	0.476974	0.507078	0.542036	0.623602	0.738281	0.775813	0.822185	0.887304	1.01652	1.16752	1.36617	1.5545	1.78887	2.16908	2.93136	4.07358	5.28366	7.44815	11.6395	19.7839	35.7684	120.624
0.0842036	0.174748	0.22551	0.246094	0.289415	0.322418	0.354516	0.423003	0.481006	0.507357	0.542432	0.627418	0.738281	0.775993	0.826769	0.887304	1.01872	1.17491	1.38235	1.55643	1.82706	2.21459	2.95136	4.09416	5.3479	7.5228	11.6681	19.8361	35.7694	123.201
0.0847496	0.17665	0.226549	0.246094	0.290078	0.322554	0.357025	0.424961	0.483317	0.508259	0.545126	0.62804	0.738281	0.776365	0.831453	0.887304	1.02848	1.18519	1.39058	1.55643	1.83919	2.2157	2.97356	4.09722	5.34906	7.52902	11.7588	19.8635	35.8799	127.447
0.0847767	0.176813	0.226862	0.246094	0.290154	0.324832	0.357244	0.425617	0.486799	0.510325	0.547396	0.631876	0.738281	0.778217	0.834019	0.887304	1.03383	1.1967	1.39116	1.55643	1.85802	2.22333	2.99033	4.16538	5.3546	7.59283	11.7766	19.9351	36.1153	127.992
0.084815	0.177238	0.228017	0.246094	0.290589	0.325668	0.357542	0.427915	0.48736	0.510641	0.550282	0.63231	0.738281	0.778217	0.838871	0.889879	1.03492	1.20476	1.39212	1.57577	1.87322	2.2538	3.00396	4.17635	5.37477	7.6408	11.8176	20.0668	36.6615	128.777
0.0850004	0.177626	0.228886	0.246094	0.292074	0.326539	0.357916	0.433084	0.487883	0.51341	0.550282	0.632905	0.738281	0.778217	0.844819	0.894346	1.03962	1.20545	1.39971	1.57577	1.87419	2.25426	3.02617	4.19045	5.41302	7.70145	11.9754	20.1733	36.7875	133.708
0.0852122	0.178703	0.228915	0.246094	0.292427	0.326739	0.359222	0.433296	0.490193	0.51486	0.550282	0.634651	0.738281	0.778217	0.845542	0.897431	1.04251	1.21942	1.41084	1.59332	1.88558	2.26887	3.03537	4.2425	5.41743	7.79897	11.99	20.2606	36.8016	134.578
0.0853325	0.179602	0.229265	0.246094	0.29252	0.3283	0.359338	0.436072	0.491951	0.516759	0.550282	0.634702	0.742243	0.778217	0.84649	0.901048	1.0433	1.21957	1.42807	1.60436	1.90685	2.26887	3.04059	4.29542	5.46417	7.86136	12.0007	20.3679	36.8163	138.164
0.0854857	0.179617	0.231716	0.246094	0.293652	0.328516	0.359689	0.436694	0.492188	0.517358	0.550282	0.636207	0.745232	0.778217	0.855881	0.906423	1.04409	1.23047	1.43496	1.61054	1.92109	2.26887	3.08168	4.29706	5.48002	7.875	12.0586	20.3961	36.9714	138.558
0.0855813	0.179736	0.232244	0.246094	0.293679	0.329906	0.360688	0.437283	0.492188	0.518651	0.550282	0.63724	0.746805	0.778217	0.857101	0.910367	1.04409	1.23047	1.43496	1.61585	1.92205	2.26887	3.09895	4.33195	5.52917	7.87884	12.0661	20.5367	36.9895	138.787
0.0860664	0.17974	0.232739	0.246094	0.294802	0.331326	0.360883	0.439539	0.492188	0.518669	0.550282	0.639051	0.747938	0.778217	0.857188	0.914132	1.04409	1.24712	1.43496	1.64836	1.92205	2.26887	3.11287	4.33706	5.55213	7.88114	12.0812	20.5455	37.0717	138.885
0.086073	0.180806	0.233836	0.246094	0.29482	0.331477	0.361311	0.440612	0.492188	0.522044	0.550282	0.645886	0.750277	0.778217	0.860519	0.928145	1.06308	1.24756	1.43496	1.6493	1.92849	2.27817	3.13226	4.33905	5.58523	7.89961	12.1187	20.5586	37.121	141.638
0.0868418	0.180997	0.234454	0.246094	0.294953	0.333934	0.36242	0.441154	0.492188	0.522277	0.550282	0.647327	0.755061	0.778217	0.869673	0.928596	1.07363	1.25484	1.46342	1.65085	1.9431	2.34698	3.13574	4.34404	5.64916	7.93628	12.1845	20.6733	37.1567	144.023
0.0870073	0.181114	0.234548	0.246094	0.29529	0.33474	0.362449	0.441887	0.492188	0.523035	0.550282	0.64823	0.757206	0.778217	0.872261	0.930012	1.07778	1.25502	1.46461	1.65536	1.96875	2.36117	3.14515	4.35091	5.65634	8.06121	12.186	20.8777	37.1707	148.398
0.0870229	0.181409	0.234817	0.246094	0.296301	0.334769	0.365225	0.442508	0.492188	0.526588	0.550282	0.653004	0.757738	0.779976	0.873643	0.932896	1.08596	1.26067	1.46761	1.65619	1.96875	2.36187	3.18011	4.3655	5.68319	8.06121	12.2375	20.8933	37.2049	149.693
0.0870603	0.181524	0.235846	0.246094	0.296864	0.334906	0.365275	0.443322	0.492188	0.528914	0.550282	0.653938	0.759393	0.782122	0.880059	0.937426	1.09568	1.26335	1.47656	1.69464	1.96875	2.3782	3.20867	4.3711	5.78588	8.11736	12.2566	21.3138	37.2123	154.05
0.0871274	0.182828	0.236053	0.246094	0.298698	0.335486	0.371103	0.443715	0.492188	0.529541	0.550282	0.654476	0.759565	0.782132	0.885079	0.938893	1.10056	1.26704	1.47838	1.69579	1.97685	2.39216	3.23686	4.37411	5.79453	8.13654	12.3071	21.3322	37.3269	154.118
0.0873388	0.184294	0.236681	0.246094	0.299224	0.335955	0.372915	0.446588	0.492188	0.532773	0.550282	0.657908	0.763244	0.784393	0.885634	0.942861	1.10056	1.27921	1.48035	1.71244	1.98407	2.44448	3.2488	4.39081	5.80802	8.15458	12.6373	21.56	37.4017	159.762
0.0879506	0.184299	0.236689	0.246094	0.299285	0.336315	0.375734	0.447303	0.492188	0.53588	0.551923	0.662892	0.767267	0.78499	0.887304	0.956924	1.11264	1.28174	1.48904	1.71636	1.98407	2.44991	3.34724	4.40638	5.81351	8.18054	12.6565	21.7679	37.433	161.684
0.0879523	0.184377	0.236888	0.246094	0.299861	0.337292	0.376034	0.448533	0.492188	0.539685	0.552136	0.663844	0.769919	0.797159	0.887304	0.96595	1.11301	1.29008	1.49693	1.71964	1.98407	2.45554	3.35028	4.41527	5.83175	8.19163	12.8147	21.8081	37.4459	162.664
0.0880417	0.184664	0.236898	0.246094	0.300857	0.337323	0.378873	0.450187	0.492188	0.548203	0.553047	0.664099	0.773882	0.804148	0.887304	0.967755	1.12081	1.32526	1.49693	1.72266	2.00693	2.46094	3.35298	4.41635	5.85179	8.21185	12.8563	21.8456	37.4795	163.763
0.088249	0.185903	0.237587	0.246094	0.301087	0.341219	0.381036	0.45586	0.492188	0.549017	0.553513	0.666428	0.775356	0.812997	0.887304	0.982451	1.12146	1.32526	1.49693	1.72266	2.01636	2.46094	3.36951	4.4391	5.89601	8.25057	12.8959	21.8758	37.5565	164.832
0.0885316	0.186033	0.238144	0.246094	0.303227	0.342966	0.381091	0.459116	0.492188	0.549266	0.55465	0.66803	0.777051	0.813395	0.887304	0.984375	1.12538	1.32526	1.49693	1.72835	2.02746	2.47321	3.41871	4.45695	5.93441	8.25057	13.1009	21.9148	37.5816	166.709
0.0885911	0.186802	0.238149	0.246094	0.305807	0.343254	0.383266	0.460421	0.492188	0.550282	0.55465	0.672328	0.778217	0.813672	0.887304	0.984375	1.12596	1.32526	1.50114	1.73245	2.02934	2.47321	3.44531	4.45877	5.95221	8.4105	13.2148	21.9303	37.6001	167.294
0.0886389	0.187	0.239482	0.246094	0.306188	0.343605	0.383501	0.460862	0.492188	0.550282	0.556899	0.674758	0.778217	0.825776	0.887304	0.984375	1.13922	1.32742	1.52223	1.7362	2.02934	2.5013	3.45607	4.4595	5.9573	8.54268	13.2434	22.1826	37.6724	169.809
0.0887374	0.187161	0.239721	0.246094	0.307053	0.34427	0.384629	0.462543	0.492188	0.550282	0.557448	0.675236	0.778217	0.826682	0.887304	0.988956	1.14476	1.33439	1.53194	1.74015	2.04783	2.50967	3.48932	4.47615	5.96865	8.61328	13.2457	22.2847	37.8321	171.106
0.088939	0.187621	0.239783	0.246094	0.308264	0.34505	0.389769	0.463831	0.492188	0.550282	0.562103	0.677052	0.778217	0.832129	0.887304	0.995683	1.14997	1.34067	1.5463	1.74015	2.09605	2.52029	3.51229	4.48595	5.99277	8.6445	13.2929	22.4283	37.8473	203.894
0.0892989	0.189389	0.239871	0.246094	0.308806	0.348029	0.391111	0.464871	0.492188	0.550282	0.562465	0.677146	0.778217	0.839632	0.887304	1.01467	1.16686	1.34763	1.55643	1.74015	2.10263	2.56041	3.52353	4.49924	6.00944	8.65307	13.3209	22.524	38.0228
0.0897112	0.189515	0.240281	0.246094	0.308808	0.348029	0.391395	0.465034	0.492188	0.550282	0.568972	0.67785	0.778217	0.854568	0.887304	1.01467	1.17376	1.35692	1.55643	1.74015	2.10263	2.56929	3.56341	4.54838	6.02441	8.70074	13.3822	22.6366	38.1128
0.0903177	0.189525	0.24069	0.246094	0.309477	0.348029	0.392678	0.465069	0.492188	0.550282	0.570484	0.677995	0.778217	0.854917	0.890953	1.01467	1.19235	1.36503	1.55643	1.74015	2.10263	2.56929	3.56779	4.56532	6.07807	8.72902	13.3983	22.6727	38.2965
0.0908327	0.189792	0.240887	0.246094	0.30992	0.348029	0.393817	0.467933	0.492188	0.550282	0.574568	0.678754	0.778217	0.855011	0.898968	1.01467	1.20661	1.38136	1.55643	1.74015	2.10263	2.61601	3.57896	4.61227	6.10476	8.84267	13.4273	22.7913	38.4161
0.090867	0.1898	0.240996	0.246094	0.310634	0.348029	0.394182	0.468509	0.49239	0.550282	0.575077	0.686541	0.778217	0.85777	0.903603	1.01467	1.22804	1.38203	1.55643	1.74629	2.10874	2.64054	3.58318	4.62894	6.14794	8.9478	14.0182	22.8488	38.4324
0.0909956	0.189993	0.241129	0.246094	0.311081	0.348029	0.398321	0.474326	0.493306	0.550282	0.581034	0.686564	0.778217	0.86516	0.903958	1.01652	1.23047	1.38544	1.55789	1.74664	2.11698	2.6411	3.59152	4.63317	6.17385	9.04876	14.0468	23.0121	38.4694
0.0913572	0.190082	0.24115	0.246195	0.311508	0.348029	0.398418	0.474547	0.501016	0.550282	0.585731	0.689585	0.778217	0.870073	0.904124	1.01728	1.23047	1.38966	1.5596	1.76319	2.11698	2.65598	3.5952	4.63424	6.20381	9.09322	14.0618	23.0336	38.5355
0.091588	0.190161	0.241339	0.24645	0.313395	0.348029	0.401626	0.474654	0.501441	0.550282	0.586308	0.68977	0.778217	0.87591	0.914903	1.02357	1.23047	1.39212	1.56475	1.76351	2.11698	2.65781	3.6996	4.64329	6.224	9.21456	14.0755	23.0357	38.5422
0.0922622	0.190331	0.242058	0.246875	0.313567	0.348029	0.401641	0.475218	0.503233	0.550282	0.586596	0.696058	0.778217	0.880716	0.915836	1.04409	1.23047	1.40402	1.57252	1.76585	2.11698	2.71819	3.7041	4.6693	6.22573	9.2621	14.2234	23.136	38.5457
0.092356	0.190987	0.242939	0.247228	0.314836	0.348029	0.402544	0.482749	0.5052	0.550282	0.588177	0.696058	0.778217	0.883209	0.918503	1.04409	1.23047	1.40979	1.57577	1.76683	2.11764	2.74976	3.76981	4.68225	6.2306	9.30515	14.2819	23.1921	38.5645
0.0924225	0.191071	0.243074	0.247693	0.31531	0.348029	0.403073	0.484841	0.507461	0.550282	0.590801	0.696058	0.778217	0.885299	0.921329	1.04409	1.23047	1.41033	1.57592	1.76806	2.1229	2.75141	3.83259	4.71609	6.26699	9.37097	14.377	23.3828	38.74
0.0927128	0.191526	0.243472	0.248047	0.31701	0.348029	0.403854	0.486724	0.511288	0.550282	0.593206	0.696058	0.778217	0.885875	0.923616	1.04426	1.23047	1.41447	1.58451	1.77105	2.13402	2.75141	3.87372	4.75143	6.27418	9.44534	14.609	23.6877	38.8111
0.0928042	0.191674	0.245568	0.249599	0.318126	0.348029	0.4049	0.487088	0.511556	0.550282	0.598143	0.696058	0.778217	0.886556	0.928759	1.04871	1.23047	1.42498	1.58704	1.77259	2.16627	2.75141	3.89108	4.75393	6.28865	9.46742	14.6214	23.7388	38.8221
0.0929444	0.191867	0.246094	0.252302	0.318709	0.348029	0.410114	0.490957	0.511914	0.550282	0.599767	0.696058	0.778217	0.887304	0.929148	1.05205	1.23047	1.43496	1.58779	1.77461	2.17187	2.75951	3.89108	4.76841	6.30308	9.64835	14.7697	23.8317	39.0886
0.093043	0.192417	0.246094	0.252563	0.319649	0.348029	0.410153	0.492188	0.514182	0.550282	0.600244	0.696058	0.778217	0.887304	0.932727	1.05417	1.24535	1.43496	1.60564	1.77461	2.19866	2.77325	3.89108	4.77828	6.32705	9.73549	14.8168	23.8406	39.2386
0.0933621	0.193528	0.246094	0.25291	0.320113	0.348029	0.411776	0.492188	0.515306	0.550282	0.601503	0.696058	0.778217	0.887304	0.934081	1.05826	1.25484	1.43496	1.60795	1.77461	2.20113	2.79191	3.89396	4.77828	6.32705	9.79588	14.9129	23.8488	39.4953
0.0933705	0.193643	0.246094	0.253787	0.321086	0.348029	0.413558	0.492188	0.515448	0.550282	0.60211	0.696058	0.778217	0.887304	0.938106	1.06197	1.25484	1.47656	1.61269	1.77461	2.21484	2.79893	3.93078	4.7868	6.38897	9.7975	15.1957	23.9257	39.6303
0.093399	0.194371	0.246094	0.254229	0.321179	0.348029	0.414346	0.492188	0.516137	0.550282	0.611151	0.696058	0.779219	0.887304	0.941232	1.06809	1.25484	1.49693	1.61893	1.79159	2.22847	2.85495	3.936	4.78929	6.38897	9.84375	15.2537	23.9597	39.8765
0.0934681	0.194591	0.246094	0.254408	0.321954	0.348029	0.415639	0.492188	0.517175	0.550282	0.612099	0.696706	0.779929	0.887304	0.942739	1.07018	1.25484	1.49693	1.62466	1.79679	2.22847	2.8628	3.9375	4.83498	6.38897	9.88366	15.2598	23.9736	40.3241
0.0937745	0.195145	0.246094	0.254989	0.322282	0.348029	0.41954	0.492188	0.519973	0.551117	0.61364	0.698352	0.781916	0.887304	0.953626	1.07351	1.25484	1.49693	1.6369	1.8223	2.22847	2.87147	3.9943	4.84657	6.41502	9.92036	15.2617	24.0568	40.4231
0.093779	0.195562	0.246094	0.255034	0.323856	0.348029	0.420466	0.492188	0.522178	0.55465	0.616059	0.701184	0.784393	0.887304	0.955083	1.07685	1.25484	1.49693	1.64261	1.82698	2.24698	2.88045	3.99452	4.87745	6.44089	10.1018	15.2877	24.0727	40.4748
0.0940585	0.195676	0.246094	0.255846	0.325317	0.348029	0.42293	0.492188	0.525761	0.55465	0.616846	0.701583	0.784393	0.887304	0.955848	1.08837	1.25484	1.49693	1.65085	1.83456	2.25825	2.89464	4.02788	4.93619	6.44089	10.1887	15.4177	24.0833	40.7097
0.0946807	0.195699	0.246094	0.25716	0.326901	0.348029	0.423632	0.492188	0.528914	0.558162	0.618514	0.702135	0.785677	0.888551	0.978806	1.09218	1.25484	1.49926	1.65085	1.84364	2.26887	2.95049	4.06507	4.94642	6.45299	10.1973	15.455	24.1175	40.9093
0.0947641	0.195724	0.246094	0.257423	0.328662	0.348428	0.423739	0.492188	0.531975	0.561908	0.621008	0.705614	0.786455	0.889238	0.980246	1.09473	1.25733	1.49972	1.65085	1.84858	2.26887	2.95312	4.0669	4.95267	6.47406	10.2298	15.5744	24.1844	40.9699
0.0948439	0.196028	0.246094	0.258526	0.329135	0.350791	0.424445	0.492188	0.532022	0.564308	0.622082	0.70641	0.787998	0.89032	0.980276	1.10056	1.25779	1.50145	1.65912	1.86581	2.26887	2.96336	4.07657	4.96894	6.49031	10.2831	15.6891	24.2424	41.0527
0.0954473	0.196059	0.246094	0.258747	0.331216	0.350791	0.42592	0.492188	0.533451	0.564645	0.625809	0.709125	0.788206	0.893227	0.984375	1.10056	1.26165	1.50153	1.67134	1.8672	2.26887	2.97089	4.09555	4.98785	6.49201	10.4713	15.7057	24.2636	41.1455
0.0955111	0.196148	0.246094	0.258926	0.332009	0.350791	0.428696	0.492188	0.535844	0.565554	0.627742	0.711341	0.788281	0.897787	0.984375	1.10056	1.26228	1.50483	1.68965	1.88907	2.26887	2.97356	4.12562	5.01113	6.49706	10.5415	15.7268	24.3285	41.4473
0.0960404	0.196165	0.246094	0.259267	0.332772	0.351574	0.428731	0.492188	0.537491	0.565695	0.6288	0.714825	0.789798	0.901969	0.984375	1.10056	1.26695	1.51877	1.72266	1.89074	2.26887	2.99219	4.12597	5.01935	6.5666	10.5677	15.7798	24.4365	41.5017
0.0962558	0.196399	0.246094	0.260107	0.332898	0.352312	0.429506	0.492188	0.537613	0.566991	0.628825	0.715246	0.79042	0.902112	0.984375	1.10056	1.26896	1.5213	1.72266	1.9083	2.26887	3.00094	4.15458	5.02439	6.62628	10.5849	15.7882	24.4625	42.4778
0.0963611	0.196598	0.246094	0.261579	0.332977	0.357001	0.429569	0.492188	0.537722	0.571293	0.634794	0.716469	0.799496	0.919372	0.984375	1.11319	1.27235	1.5263	1.73913	1.91008	2.31993	3.01882	4.15914	5.06731	6.62628	10.5849	15.9126	24.511	43.0937
0.0963811	0.196807	0.246094	0.262058	0.333164	0.358699	0.429879	0.492188	0.538262	0.572117	0.637086	0.718778	0.800516	0.92002	0.984375	1.11417	1.27349	1.52678	1.74015	1.92205	2.32164	3.02805	4.17066	5.07335	6.62746	10.6024	16.0226	24.5579	43.1282
0.0965925	0.197364	0.246094	0.262495	0.333352	0.360704	0.429932	0.492188	0.539101	0.575195	0.642001	0.721795	0.802195	0.922753	0.986198	1.11441	1.2774	1.52965	1.74015	1.92841	2.32496	3.04401	4.17298	5.07335	6.64154	10.6072	16.0433	24.5663	43.157
0.0973564	0.197887	0.246094	0.262828	0.33756	0.360918	0.430008	0.492188	0.540322	0.575305	0.643461	0.724316	0.814024	0.924784	0.998463	1.12097	1.28521	1.53262	1.74015	1.9563	2.36985	3.04401	4.18359	5.10279	6.67483	10.7213	16.1344	24.5909	43.378
0.0976999	0.198278	0.246094	0.263944	0.33766	0.361843	0.430352	0.492188	0.542537	0.57966	0.645591	0.726203	0.815712	0.926071	1.00147	1.12573	1.29052	1.55278	1.74015	1.95853	2.38047	3.05691	4.2095	5.11771	6.69447	10.7941	16.1908	24.7019	43.5384
0.0977852	0.198524	0.246094	0.265783	0.337971	0.361889	0.431044	0.492188	0.548499	0.580358	0.64752	0.726624	0.816055	0.932063	1.00838	1.13573	1.29477	1.55643	1.74618	1.96875	2.41179	3.05955	4.21245	5.12025	6.77093	10.7943	16.2314	24.7174	43.5871
0.0990699	0.198905	0.246094	0.265838	0.338763	0.362392	0.432012	0.492455	0.549963	0.580514	0.651302	0.72872	0.816136	0.934222	1.00997	1.15856	1.29624	1.55643	1.75401	1.97006	2.42322	3.06537	4.26918	5.12088	6.8022	10.8309	16.373	24.7725	44.1136
0.0990753	0.200219	0.246094	0.266658	0.340053	0.362438	0.432185	0.492749	0.550282	0.583414	0.653661	0.729433	0.820044	0.939196	1.01084	1.16212	1.30218	1.55643	1.77461	1.98041	2.42374	3.08	4.28064	5.22044	6.84268	10.8644	16.4294	24.796	44.5363
0.0990805	0.200309	0.246094	0.268215	0.340852	0.363558	0.432568	0.494647	0.550282	0.585328	0.65638	0.731686	0.822007	0.945086	1.01259	1.18813	1.3083	1.55744	1.77461	1.98407	2.4309	3.08355	4.29784	5.22044	6.86417	10.8929	16.5048	24.8262	45.0395
0.0993709	0.200592	0.246094	0.269756	0.340918	0.364425	0.43379	0.49603	0.550282	0.587306	0.656844	0.733994	0.82338	0.949481	1.01393	1.1897	1.32526	1.55857	1.78969	1.98407	2.43796	3.13226	4.30488	5.28029	6.86421	10.9436	16.5176	24.8357	45.3611
0.0996461	0.200629	0.246094	0.271424	0.343269	0.367657	0.433865	0.496094	0.550282	0.590545	0.660973	0.738197	0.82617	0.954516	1.01467	1.19388	1.32526	1.563	1.78977	1.98407	2.45711	3.15287	4.35017	5.28555	6.90818	11.0056	16.5543	24.8674	45.4364
0.0997376	0.201404	0.246094	0.272975	0.34613	0.36806	0.434411	0.499172	0.550282	0.592983	0.661335	0.738281	0.828224	0.95485	1.01467	1.19893	1.32526	1.57577	1.79126	1.98407	2.48047	3.20867	4.35674	5.31243	6.94752	11.0056	16.5908	24.9576	45.4481
0.101034	0.201576	0.246094	0.273315	0.347926	0.368735	0.437853	0.499269	0.550282	0.595311	0.662473	0.738281	0.830067	0.961954	1.01467	1.23047	1.32526	1.57577	1.79159	1.98407	2.48258	3.23613	4.41239	5.34331	7.05197	11.1422	16.6321	25.0269	45.5599
0.101302	0.201666	0.246094	0.27406	0.348029	0.368793	0.439085	0.499887	0.550282	0.596556	0.66356	0.738281	0.83049	0.970265	1.01467	1.23047	1.32526	1.57577	1.79159	1.98407	2.50967	3.2455	4.41521	5.3546	7.15367	11.1424	16.7199	25.3668	45.6768
0.101308	0.202253	0.246094	0.278777	0.348029	0.369438	0.444569	0.500658	0.550282	0.598128	0.680715	0.738281	0.834466	0.970601	1.01467	1.23047	1.32526	1.57694	1.79159	1.98996	2.51333	3.28628	4.41982	5.3546	7.15906	11.1727	16.7633	25.4621	45.9214
0.101735	0.202584	0.246094	0.28105	0.348029	0.369696	0.444607	0.501757	0.550282	0.602212	0.681549	0.738281	0.84077	0.974121	1.02659	1.23047	1.32526	1.57847	1.81196	2.00017	2.51645	3.28698	4.42243	5.37477	7.16636	11.227	16.7658	25.5476	46.1693
0.10208	0.202879	0.246094	0.282963	0.348029	0.372519	0.445165	0.502824	0.550282	0.602486	0.681597	0.738281	0.841011	0.984375	1.02787	1.23047	1.32598	1.5857	1.83381	2.02934	2.52635	3.30169	4.42279	5.40112	7.18612	11.2344	16.9018	25.6658	46.7189
0.10215	0.203008	0.246094	0.283412	0.348029	0.373771	0.447597	0.502931	0.550282	0.605288	0.683067	0.738281	0.846454	0.984375	1.04036	1.23047	1.3514	1.60587	1.83805	2.04043	2.53067	3.34407	4.42904	5.43639	7.20429	11.2344	16.9018	25.9042	46.7585
0.10252	0.203033	0.246094	0.284302	0.348029	0.374449	0.447686	0.504398	0.550282	0.605572	0.683191	0.73904	0.848049	0.984375	1.04247	1.23047	1.37143	1.61172	1.85298	2.06355	2.53369	3.34707	4.42947	5.45328	7.23783	11.2344	16.9233	26.1045	46.7919
0.102579	0.203113	0.246094	0.284679	0.348029	0.377118	0.449622	0.504592	0.550282	0.606185	0.683935	0.743305	0.857985	0.984375	1.04409	1.23047	1.37405	1.6235	1.86947	2.0862	2.53369	3.34724	4.43652	5.46589	7.26706	11.287	16.9253	26.2846	46.9833
0.102916	0.20325	0.246094	0.288277	0.348029	0.378811	0.45014	0.504746	0.550282	0.606373	0.687272	0.746836	0.858261	0.984375	1.07888	1.23047	1.38203	1.63595	1.87231	2.08817	2.53369	3.34724	4.43652	5.46964	7.27787	11.2908	16.9388	26.3056	47.3485
0.103275	0.203338	0.246094	0.289084	0.348029	0.379873	0.450556	0.509168	0.550282	0.608404	0.690812	0.75217	0.870073	0.984375	1.08567	1.23047	1.39131	1.63715	1.87419	2.10263	2.54356	3.40274	4.45695	5.47152	7.28787	11.3203	17.0255	26.3456	47.376
0.103417	0.203371	0.246094	0.291097	0.348029	0.380268	0.451402	0.512536	0.550282	0.609178	0.691903	0.759068	0.874212	0.984375	1.08752	1.23047	1.39212	1.64657	1.87419	2.10263	2.56929	3.42087	4.45695	5.52439	7.29627	11.323	17.0668	26.4708	47.6361
0.103473	0.204633	0.246094	0.291424	0.348029	0.381293	0.452539	0.514583	0.550282	0.609528	0.695528	0.767864	0.876932	0.992718	1.09117	1.23047	1.39375	1.65085	1.87419	2.10263	2.58693	3.42769	4.45695	5.53027	7.31926	11.3364	17.0676	26.5063	47.68
0.103536	0.205296	0.246094	0.294157	0.348029	0.383035	0.456482	0.516015	0.550282	0.609883	0.696058	0.768612	0.87867	0.995086	1.09688	1.23047	1.39493	1.65085	1.87419	2.11698	2.60161	3.43286	4.47285	5.57202	7.41146	11.355	17.0676	26.5143	47.7022
0.103738	0.205533	0.246094	0.294646	0.348029	0.384414	0.456723	0.51622	0.550282	0.612524	0.696058	0.769043	0.884774	1.00081	1.09732	1.23047	1.39842	1.65085	1.87419	2.11698	2.61601	3.43602	4.5044	5.58993	7.41963	11.4003	17.2387	26.5895	47.7523
0.103761	0.206618	0.246094	0.295293	0.348029	0.386494	0.45826	0.516879	0.550282	0.613013	0.696058	0.769333	0.887304	1.00184	1.10056	1.23047	1.40018	1.66543	1.87439	2.13485	2.63206	3.52505	4.51663	5.59315	7.42822	11.4003	17.2897	26.6339	47.8474
0.104179	0.207952	0.246094	0.29533	0.348029	0.386739	0.459045	0.5227	0.550282	0.614458	0.696058	0.776137	0.887304	1.00329	1.10056	1.23047	1.40317	1.67403	1.88451	2.14383	2.65051	3.56444	4.5342	5.61015	7.44554	11.5583	17.2971	26.6782	47.9283
0.10429	0.20824	0.246094	0.29739	0.348029	0.38784	0.462357	0.523039	0.550282	0.618597	0.696058	0.777071	0.887304	1.00364	1.10056	1.23047	1.41257	1.68342	1.89111	2.17571	2.65051	3.56942	4.53774	5.70196	7.52902	11.5847	17.3575	26.6805	48.0076
0.104357	0.208959	0.246094	0.298854	0.348029	0.38961	0.462471	0.525296	0.550282	0.621318	0.696058	0.778217	0.887304	1.01467	1.10056	1.23047	1.43046	1.70365	1.89901	2.17703	2.65659	3.58318	4.53774	5.7081	7.68044	11.6082	17.3965	26.9425	48.2951
0.104359	0.209473	0.246094	0.299559	0.348029	0.391624	0.462972	0.526508	0.550282	0.621667	0.696058	0.778217	0.887304	1.01467	1.10056	1.23047	1.43496	1.70653	1.91296	2.17823	2.72546	3.58318	4.54221	5.7178	7.73205	11.6356	17.4049	27.137	48.5298
0.104497	0.209769	0.246094	0.300234	0.348029	0.392126	0.463682	0.527781	0.550282	0.623056	0.696058	0.778217	0.887304	1.01467	1.10464	1.23583	1.43496	1.70905	1.91916	2.18195	2.75141	3.59795	4.55352	5.73984	7.78136	11.647	17.431	27.2809	48.9011
0.104829	0.209852	0.246094	0.300956	0.348029	0.392676	0.463774	0.528673	0.550282	0.629933	0.697065	0.778217	0.887304	1.01467	1.10651	1.24023	1.44556	1.71314	1.92205	2.18412	2.75141	3.60398	4.56726	5.7447	7.85189	11.6681	17.5207	27.6349	49.1707
0.105034	0.209935	0.246094	0.302308	0.348029	0.393421	0.466853	0.530182	0.551902	0.634478	0.697686	0.778217	0.887304	1.01467	1.11611	1.25484	1.44568	1.74015	1.92205	2.20113	2.75141	3.60918	4.62724	5.74499	7.87884	11.7328	17.5349	27.6721	49.1819
0.105059	0.210936	0.246094	0.302343	0.348029	0.394439	0.471174	0.534793	0.55229	0.635909	0.69892	0.778769	0.887304	1.01467	1.12199	1.25484	1.44683	1.74015	1.93731	2.20113	2.78423	3.62999	4.62901	5.79236	7.93628	11.7405	17.5793	27.6732	49.2182
0.105205	0.211125	0.246094	0.303821	0.348029	0.395016	0.471946	0.535699	0.55465	0.636843	0.701583	0.77894	0.888122	1.01467	1.13791	1.25484	1.45009	1.74015	1.94239	2.20113	2.79656	3.63228	4.64605	5.84958	7.97055	11.8176	17.5987	27.7137	49.349
0.10532	0.212495	0.246094	0.304156	0.348029	0.396622	0.475231	0.537824	0.556213	0.637586	0.702211	0.784393	0.901951	1.01467	1.14909	1.25484	1.45239	1.74015	1.95145	2.20113	2.79742	3.65845	4.6693	5.86037	7.97055	11.879	17.6541	27.7673	49.504
0.105806	0.212924	0.246094	0.304954	0.348029	0.397316	0.475913	0.539285	0.556439	0.638524	0.702468	0.78933	0.910665	1.01467	1.14943	1.25484	1.45917	1.74015	1.96875	2.21484	2.8059	3.69141	4.67578	5.87175	7.99449	11.9044	17.7205	27.9335	49.5958
0.107033	0.213234	0.246094	0.307409	0.348029	0.39831	0.477808	0.540919	0.557381	0.639131	0.710401	0.800307	0.913006	1.01467	1.15491	1.25484	1.47269	1.74534	1.98407	2.21484	2.8059	3.69396	4.67604	5.89601	8.01601	11.9374	17.8176	27.9355	49.6597
0.10804	0.213841	0.246094	0.308607	0.348029	0.400199	0.478169	0.541893	0.558042	0.646514	0.719518	0.80059	0.914222	1.01467	1.16907	1.25484	1.47419	1.7464	1.98407	2.21661	2.81265	3.7118	4.6835	5.89653	8.22205	12.0007	17.8563	28.0512	49.9342
0.108541	0.213898	0.246094	0.308792	0.348029	0.401004	0.478215	0.54321	0.558839	0.647686	0.722145	0.801087	0.914225	1.01738	1.17531	1.28568	1.47656	1.76609	1.98407	2.2186	2.81835	3.71406	4.71901	5.90449	8.25424	12.0385	17.9159	28.4076	49.954
0.108762	0.214081	0.246094	0.308893	0.348029	0.401314	0.478346	0.54455	0.560347	0.648688	0.722543	0.802266	0.919988	1.02272	1.18082	1.28755	1.47656	1.76917	1.98407	2.22847	2.83176	3.76451	4.72513	5.9165	8.30179	12.0593	18.0388	28.4832	49.977
0.109351	0.215512	0.246094	0.309405	0.348099	0.403237	0.48017	0.546361	0.562344	0.64978	0.738281	0.80233	0.926891	1.02279	1.18436	1.29679	1.47656	1.77461	1.98648	2.22847	2.84717	3.80799	4.72731	5.95221	8.35073	12.0613	18.0543	28.5055	50.1879
0.109489	0.216047	0.246094	0.309722	0.34859	0.403606	0.480393	0.550282	0.56972	0.653172	0.738281	0.810727	0.92943	1.02303	1.19797	1.29902	1.47656	1.77461	2.00409	2.24596	2.87442	3.91115	4.75038	6.00791	8.37471	12.1163	18.059	28.531	50.2622
0.109663	0.216373	0.246094	0.310493	0.348988	0.403821	0.482948	0.550282	0.569902	0.653477	0.738281	0.816789	0.933582	1.03116	1.19865	1.30183	1.47905	1.77461	2.01766	2.24897	2.87764	3.94653	4.75148	6.00791	8.38043	12.1187	18.2059	28.734	50.3039
0.10974	0.216412	0.246094	0.311063	0.350423	0.404273	0.484335	0.550282	0.571743	0.65526	0.738281	0.818912	0.934215	1.03357	1.21197	1.31173	1.49693	1.77461	2.02934	2.26887	2.87967	3.94848	4.75333	6.05311	8.3997	12.1487	18.5679	28.7355	51.082
0.110056	0.216754	0.246094	0.311935	0.351858	0.405797	0.484483	0.550282	0.572833	0.659781	0.738281	0.82145	0.93722	1.0364	1.22327	1.3187	1.49693	1.77461	2.02934	2.26887	2.88045	3.96159	4.80344	6.07156	8.4177	12.1754	18.5894	28.7751	51.2947
0.110306	0.217284	0.246094	0.311961	0.352144	0.408798	0.488064	0.550282	0.575741	0.663788	0.738281	0.827106	0.939777	1.03938	1.23047	1.32399	1.49693	1.77461	2.02934	2.26887	2.88045	3.97443	4.80816	6.07614	8.47506	12.2183	18.6057	28.8171	51.3812
0.110417	0.217866	0.246094	0.313265	0.353124	0.412049	0.490441	0.550282	0.576332	0.667158	0.738281	0.832472	0.949705	1.04319	1.23047	1.32526	1.49693	1.78869	2.02934	2.27235	2.88712	4.00612	4.8162	6.07807	8.58725	12.3016	18.6269	28.9702	51.5424
0.11059	0.218359	0.246094	0.313698	0.353854	0.414415	0.49108	0.550282	0.577984	0.668581	0.738281	0.843943	0.953194	1.04409	1.23047	1.32526	1.50198	1.79159	2.04111	2.27236	2.89156	4.00612	4.8162	6.11284	8.71988	12.3071	18.6932	29.0735	51.617
0.111099	0.219886	0.246094	0.315983	0.354949	0.414601	0.492188	0.550282	0.579746	0.671584	0.742815	0.845276	0.953462	1.04409	1.23047	1.32526	1.51863	1.79159	2.05685	2.31206	2.90591	4.03791	4.83216	6.13634	8.84296	12.3661	18.7813	29.1515	51.807
0.111351	0.221215	0.246094	0.31611	0.355213	0.415037	0.492188	0.550282	0.583375	0.672581	0.744141	0.846431	0.954478	1.04409	1.23047	1.33001	1.53978	1.79159	2.07492	2.32164	2.92183	4.07358	4.83498	6.15234	8.90554	12.4046	18.93	29.1857	51.9264
0.111359	0.221449	0.246094	0.316712	0.356437	0.415908	0.492188	0.550282	0.583842	0.678411	0.747945	0.848924	0.957656	1.05066	1.23047	1.3358	1.54945	1.81401	2.0792	2.32164	2.96336	4.08024	4.83651	6.15234	8.95795	12.5532	18.9812	29.2614	52.0603
0.111586	0.221662	0.246094	0.317257	0.356575	0.417289	0.492188	0.550282	0.587286	0.679024	0.749237	0.849422	0.958025	1.05251	1.23047	1.34236	1.56203	1.82813	2.08086	2.33465	2.96598	4.0827	4.8447	6.20501	9.04876	12.6373	18.9875	29.311	52.5051
0.111822	0.2217	0.246094	0.319475	0.356664	0.417711	0.492188	0.550282	0.588581	0.679041	0.750553	0.851414	0.958856	1.0559	1.23047	1.34509	1.57577	1.82889	2.09071	2.33465	2.97209	4.08498	4.85435	6.22573	9.07883	12.6723	19.0321	29.484	52.5449
0.111933	0.221703	0.246094	0.320743	0.357686	0.418477	0.492188	0.550282	0.589643	0.680834	0.751383	0.853263	0.968277	1.06558	1.23047	1.3527	1.57577	1.83138	2.09752	2.33465	2.97356	4.09899	4.86008	6.27418	9.10547	12.7138	19.1555	29.9528	52.5477
0.112098	0.221958	0.246532	0.321555	0.359401	0.420617	0.492188	0.550282	0.594037	0.680909	0.753252	0.864274	0.969492	1.0704	1.23047	1.35584	1.57577	1.85936	2.10095	2.33557	2.99353	4.11534	4.86082	6.30788	9.20946	12.7328	19.1701	29.9584	52.7543
0.11313	0.222248	0.246727	0.322107	0.360148	0.421062	0.492188	0.550282	0.594215	0.681842	0.763879	0.866352	0.978584	1.07613	1.23047	1.3572	1.57577	1.86935	2.10263	2.34646	2.99386	4.17128	4.88208	6.34263	9.22441	13.0411	19.1795	30.1743	52.9267
0.113539	0.223125	0.247573	0.323199	0.361761	0.423563	0.492188	0.550282	0.596746	0.682146	0.765064	0.868335	0.980323	1.07781	1.23047	1.35848	1.57577	1.87343	2.10474	2.35912	3.00396	4.17452	4.92802	6.35094	9.26608	13.0615	19.2153	30.457	53.0512
0.11417	0.223855	0.248047	0.32348	0.36195	0.42405	0.492188	0.550282	0.598356	0.686792	0.765696	0.875559	0.984375	1.07784	1.23047	1.36082	1.5956	1.87419	2.10625	2.39558	3.04401	4.18257	4.92802	6.38422	9.28658	13.0801	19.2205	30.5127	53.0565
0.114203	0.223875	0.248047	0.324401	0.362069	0.425244	0.492188	0.550282	0.601965	0.695476	0.771059	0.877998	0.984375	1.09638	1.23047	1.36883	1.60085	1.87419	2.111	2.40536	3.07164	4.19083	4.93569	6.41734	9.37097	13.1179	19.2536	30.6325	53.2496
0.114437	0.22425	0.248047	0.324908	0.365337	0.42792	0.492188	0.550282	0.602081	0.696058	0.772368	0.878432	0.984375	1.09722	1.23047	1.37068	1.60444	1.89892	2.11698	2.40994	3.08355	4.19174	4.96018	6.47441	9.49731	13.2297	19.3164	30.676	53.2933
0.115267	0.224318	0.248084	0.32504	0.366105	0.428771	0.492188	0.550282	0.602731	0.696058	0.77572	0.881519	0.984375	1.10056	1.23653	1.38278	1.62007	1.90415	2.12226	2.42169	3.08355	4.19265	4.9622	6.50172	9.6427	13.2663	19.4004	30.7275	53.3177
0.115419	0.225202	0.248121	0.325108	0.366844	0.428802	0.492188	0.550282	0.603807	0.696058	0.777877	0.88164	0.984375	1.10056	1.23998	1.38505	1.6207	1.90731	2.12655	2.42374	3.11287	4.20469	4.97477	6.50172	9.65114	13.5118	19.5263	30.9824	53.5761
0.115535	0.225454	0.248445	0.326498	0.367795	0.428973	0.492188	0.550282	0.605529	0.696058	0.778217	0.887304	0.984375	1.10056	1.25161	1.39168	1.62416	1.90909	2.13704	2.42374	3.12264	4.22409	4.99563	6.51711	9.66481	13.5374	19.6413	31.0164	53.6183
0.115583	0.225533	0.248592	0.327291	0.368598	0.432415	0.492188	0.550282	0.606722	0.696058	0.778217	0.887304	0.984375	1.10056	1.25484	1.39212	1.62878	1.91214	2.15953	2.42374	3.13992	4.22807	5.01019	6.55901	9.68559	13.591	19.6829	31.2345	53.706
0.115751	0.225861	0.248636	0.327371	0.368787	0.432572	0.492188	0.550282	0.612267	0.696058	0.778217	0.887304	0.988988	1.10056	1.25484	1.39212	1.64403	1.91292	2.17621	2.4362	3.15154	4.27747	5.01608	6.56887	9.73549	13.6118	19.8377	31.2781	53.9228
0.115838	0.226419	0.248737	0.328032	0.368883	0.436878	0.492188	0.550282	0.617756	0.696058	0.778217	0.887304	0.990562	1.10056	1.25484	1.39212	1.65085	1.91393	2.19214	2.4362	3.16496	4.28195	5.03415	6.61872	9.75103	13.6337	19.8651	31.3823	54.1546
0.115981	0.226519	0.248967	0.328124	0.369395	0.439684	0.492188	0.550282	0.618076	0.696058	0.778217	0.887304	0.990735	1.10056	1.25484	1.39212	1.65085	1.91467	2.20113	2.45522	3.18952	4.28195	5.053	6.61872	9.8193	13.8361	19.9177	31.4232	54.3026
0.116043	0.227227	0.249537	0.328836	0.369479	0.442034	0.492188	0.550282	0.618322	0.696058	0.778217	0.887304	1.00458	1.10959	1.25484	1.40204	1.65085	1.92205	2.20113	2.46094	3.19922	4.2899	5.06738	6.62428	9.82528	13.9255	20.0076	31.6042	54.4374
0.116118	0.227774	0.250119	0.329096	0.369683	0.442352	0.492188	0.550282	0.61879	0.698926	0.778217	0.887304	1.01052	1.11914	1.25484	1.41139	1.666	1.92205	2.20113	2.47321	3.20867	4.29592	5.06738	6.63073	9.84951	14.0103	20.0849	31.6228	54.5515
0.116373	0.228536	0.250428	0.329731	0.369964	0.445157	0.492188	0.550282	0.620849	0.699367	0.778217	0.887304	1.01348	1.12676	1.25484	1.41383	1.67004	1.94143	2.20113	2.49045	3.22419	4.30302	5.07335	6.63263	9.88366	14.036	20.0895	31.6812	54.5624
0.116389	0.229891	0.251913	0.330043	0.371612	0.446725	0.49239	0.550282	0.622326	0.701202	0.778217	0.887304	1.01467	1.12757	1.25484	1.41994	1.67076	1.95311	2.20113	2.50967	3.28864	4.33149	5.07898	6.64453	9.88366	14.0962	20.0907	31.8061	54.5703
0.116537	0.231421	0.252688	0.331018	0.373595	0.448652	0.49274	0.550282	0.624149	0.701583	0.780186	0.887304	1.01467	1.13708	1.25941	1.4208	1.67466	1.96827	2.20939	2.51418	3.30169	4.35384	5.09834	6.67426	9.94706	14.1138	20.1572	31.8437	54.6531
0.11663	0.231447	0.252876	0.331157	0.375388	0.450499	0.492793	0.550282	0.627182	0.706179	0.783912	0.887304	1.01467	1.14388	1.26415	1.43236	1.67652	1.96875	2.21484	2.53242	3.33138	4.35504	5.12404	6.68542	10.1478	14.2227	20.3047	31.858	54.7115
0.116681	0.232712	0.252902	0.33314	0.377297	0.450531	0.493879	0.550282	0.627219	0.710114	0.784358	0.887304	1.01467	1.14597	1.27173	1.43496	1.69135	1.98407	2.21484	2.53369	3.34366	4.38157	5.16797	6.71705	10.1768	14.2756	20.3604	31.8725	54.8216
0.11686	0.233532	0.254622	0.333576	0.378001	0.451384	0.49467	0.550282	0.627255	0.714281	0.789107	0.887304	1.01467	1.15952	1.29147	1.43496	1.72098	1.98407	2.22847	2.53369	3.3685	4.3931	5.18988	6.71822	10.1893	14.3252	20.726	31.8794	54.8702
0.116873	0.234178	0.254956	0.335283	0.380219	0.454237	0.494776	0.550282	0.634037	0.718634	0.794936	0.887304	1.01467	1.1622	1.30333	1.43496	1.72266	1.98407	2.24616	2.53685	3.39902	4.40823	5.26088	6.72156	10.1947	14.4109	20.7435	32.6081	54.927
0.117196	0.234188	0.256255	0.335435	0.381017	0.454253	0.495707	0.550282	0.634888	0.720776	0.795592	0.887304	1.01467	1.16411	1.30381	1.43496	1.72266	1.98407	2.25303	2.54625	3.41884	4.42021	5.26781	6.77093	10.2358	14.4981	21.0597	32.6252	54.9575
0.117277	0.234335	0.258012	0.336482	0.381364	0.454533	0.495799	0.550282	0.636322	0.720914	0.797231	0.88931	1.01467	1.1662	1.30714	1.43496	1.7247	1.98407	2.25688	2.55606	3.42297	4.43523	5.27147	6.79379	10.2831	14.5569	21.1698	32.7092	54.9909
0.11739	0.234422	0.258473	0.336657	0.381987	0.454975	0.497104	0.550282	0.639339	0.721382	0.801246	0.894346	1.01467	1.17747	1.31534	1.458	1.73051	2.02558	2.25989	2.56312	3.42769	4.43796	5.29281	6.81893	10.3066	14.5579	21.2298	32.7684	55.0821
0.117419	0.234706	0.260079	0.338553	0.388471	0.455055	0.497698	0.554282	0.639698	0.728983	0.801947	0.895067	1.02266	1.18037	1.31853	1.46687	1.74015	2.02934	2.26641	2.56929	3.4294	4.4417	5.30102	6.85538	10.3417	14.7923	21.3281	32.833	55.0855
0.117769	0.235184	0.260646	0.338848	0.389297	0.455415	0.499863	0.55465	0.646413	0.73106	0.802394	0.896515	1.02612	1.18398	1.3225	1.47656	1.74015	2.02934	2.26887	2.60541	3.42944	4.45695	5.31243	6.86815	10.4467	14.9521	21.3322	32.8444	55.0939
0.118576	0.238786	0.261582	0.342428	0.390419	0.458957	0.504294	0.556729	0.649219	0.73141	0.803766	0.897272	1.02965	1.1965	1.32331	1.47656	1.74015	2.02934	2.26887	2.6068	3.45409	4.4573	5.32382	6.89502	10.4467	14.9653	21.3691	32.9809	55.0986
0.118724	0.238929	0.261736	0.343771	0.391365	0.459826	0.504776	0.557696	0.650969	0.733006	0.804204	0.897497	1.03904	1.2059	1.32493	1.49216	1.74015	2.02934	2.26887	2.62789	3.45657	4.46067	5.32382	6.89502	10.4698	15.0198	21.4132	33.0261	55.1634
0.118807	0.239455	0.262931	0.344205	0.392305	0.460104	0.506956	0.560667	0.651377	0.733957	0.81252	0.903491	1.04409	1.2131	1.32526	1.49443	1.74015	2.03347	2.26887	2.64636	3.48029	4.46956	5.3537	6.93006	10.545	15.1483	21.4328	33.0842	55.3122
0.119138	0.239982	0.263453	0.344394	0.392925	0.461898	0.508856	0.560748	0.653223	0.735697	0.813186	0.903795	1.04409	1.21542	1.32526	1.49693	1.75474	2.05572	2.2781	2.65051	3.48029	4.49666	5.36079	6.97645	10.6533	15.1568	21.461	33.0971	55.3709
0.119138	0.240204	0.263662	0.344684	0.392946	0.462468	0.514835	0.564821	0.654184	0.738281	0.81482	0.907066	1.04409	1.2249	1.32526	1.49693	1.76757	2.07469	2.2793	2.66646	3.48596	4.51768	5.40286	7.05597	10.676	15.2826	21.568	33.136	55.4751
0.119232	0.240447	0.263756	0.344799	0.393328	0.465601	0.516785	0.564828	0.656492	0.738281	0.822174	0.915903	1.04409	1.23047	1.32526	1.49693	1.76887	2.10386	2.28584	2.68304	3.50041	4.51949	5.41904	7.06169	10.7618	15.2994	21.804	33.2525	55.4842
0.120147	0.240773	0.264288	0.345151	0.395019	0.466319	0.517937	0.566116	0.656742	0.738281	0.824343	0.916039	1.04409	1.23047	1.32536	1.49693	1.7722	2.11173	2.28688	2.71663	3.54695	4.53774	5.43319	7.21057	10.7861	15.3102	21.821	33.3028	55.6607
0.120163	0.241365	0.264416	0.345519	0.395347	0.466433	0.519189	0.573243	0.657231	0.738281	0.826205	0.917341	1.04455	1.23047	1.33577	1.49693	1.77461	2.11632	2.28968	2.73698	3.58318	4.53834	5.45809	7.21888	10.7861	15.3232	21.8248	33.3691	55.7987
0.121389	0.241484	0.266526	0.34727	0.395536	0.46777	0.521438	0.573489	0.657737	0.74898	0.829143	0.918604	1.04478	1.23047	1.33777	1.49693	1.77461	2.11698	2.29559	2.74814	3.58318	4.5727	5.4957	7.40329	10.7945	15.3626	21.8386	33.3836	56.1456
0.121468	0.241558	0.267414	0.347567	0.399985	0.470047	0.521628	0.575868	0.658256	0.754573	0.829436	0.928149	1.04517	1.23047	1.34087	1.49693	1.77461	2.11698	2.32122	2.75141	3.60937	4.61691	5.50186	7.41963	10.8197	15.3945	21.8756	33.4561	56.2091
0.121468	0.242048	0.268058	0.348029	0.40014	0.471126	0.522828	0.576513	0.660248	0.755335	0.832835	0.928704	1.04536	1.23047	1.34474	1.49758	1.78134	2.11698	2.32164	2.82817	3.61779	4.63928	5.53027	7.43414	10.8339	15.4177	21.9507	33.5926	56.3103
0.121991	0.242664	0.268156	0.348029	0.400304	0.472715	0.524327	0.580072	0.662405	0.755682	0.833524	0.93536	1.05	1.23047	1.35753	1.50011	1.79456	2.11872	2.32164	2.86992	3.63086	4.64329	5.55063	7.44001	10.8908	15.4472	21.9686	33.625	56.5871
0.122368	0.244442	0.269997	0.348029	0.400722	0.474543	0.524737	0.580647	0.663963	0.769308	0.834356	0.938019	1.05011	1.23047	1.37375	1.50171	1.79614	2.1221	2.32164	2.88045	3.63353	4.65349	5.6118	7.45893	10.8955	15.4589	22.0298	33.6645	57.0476
0.122422	0.244665	0.270073	0.348029	0.401642	0.477008	0.524861	0.582885	0.665029	0.769757	0.834628	0.950744	1.0645	1.23047	1.3744	1.50213	1.80627	2.12756	2.33465	2.88718	3.66192	4.65718	5.61764	7.4856	10.9006	15.5351	22.1005	33.6766	57.4332
0.122602	0.244751	0.271989	0.348029	0.401858	0.478534	0.52605	0.583809	0.667093	0.770079	0.837286	0.952094	1.06485	1.23047	1.37586	1.5043	1.81859	2.14143	2.33465	2.92786	3.6773	4.6693	5.62258	7.5094	10.9006	15.6042	22.1005	33.6769	57.8278
0.122792	0.244801	0.272579	0.348029	0.402122	0.48256	0.531203	0.585788	0.667746	0.770262	0.840963	0.958755	1.07107	1.23047	1.39168	1.50629	1.82826	2.15196	2.38667	2.93658	3.69023	4.6693	5.68152	7.51099	10.9753	15.7698	22.1676	33.7135	57.8516
0.122962	0.246092	0.273265	0.348029	0.403543	0.483963	0.532589	0.588687	0.668391	0.773792	0.842267	0.966691	1.08036	1.23047	1.39212	1.50881	1.83185	2.15265	2.39259	2.95981	3.69699	4.67578	5.68865	7.52902	10.9871	15.8191	22.4472	33.8382	57.911
0.123222	0.246094	0.273822	0.348029	0.40548	0.484344	0.532648	0.589383	0.668514	0.775318	0.84289	0.969307	1.08076	1.23047	1.39975	1.52375	1.83641	2.15497	2.39361	2.96194	3.69868	4.70448	5.73468	7.53243	11.0056	15.8726	22.4917	33.8547	57.98
0.123863	0.246094	0.274703	0.348029	0.407145	0.484432	0.534216	0.589608	0.668569	0.775926	0.845416	0.969486	1.08087	1.23047	1.40241	1.5267	1.8495	2.16567	2.42329	2.96336	3.69964	4.71944	5.78699	7.59565	11.0165	15.9069	22.5429	33.9453	59.0724
0.123963	0.246094	0.275366	0.348029	0.408574	0.484893	0.534841	0.592019	0.669392	0.778217	0.846331	0.971301	1.08088	1.2309	1.41316	1.52777	1.86304	2.19185	2.42374	2.96336	3.704	4.7284	5.802	7.59697	11.0194	15.9126	22.5991	34.0188	59.501
0.123998	0.246094	0.276822	0.348029	0.408977	0.485035	0.535104	0.592175	0.669845	0.778217	0.848844	0.976486	1.08363	1.24023	1.41853	1.53615	1.87419	2.20113	2.42374	2.96336	3.72407	4.73325	5.80802	7.66455	11.0194	15.9506	22.643	34.0865	60.0453
0.124051	0.246094	0.27752	0.348029	0.409977	0.485098	0.53561	0.593237	0.672372	0.778217	0.849662	0.980176	1.09119	1.24023	1.43154	1.53891	1.88142	2.20113	2.42453	2.97356	3.73137	4.73371	5.81914	7.70395	11.0523	15.9666	22.7287	34.137	60.1033
0.124856	0.246094	0.278419	0.348029	0.410173	0.490063	0.537515	0.594428	0.672519	0.778217	0.854196	0.984375	1.09888	1.24147	1.43404	1.53958	1.88674	2.20269	2.4362	2.99386	3.74714	4.73794	5.87025	7.82098	11.0551	15.9961	22.8006	34.1681	60.4861
0.12494	0.246094	0.278496	0.348029	0.411588	0.491617	0.537848	0.59807	0.673094	0.778217	0.854303	0.984375	1.10056	1.24519	1.43408	1.55643	1.894	2.20729	2.46094	2.99386	3.74839	4.74144	5.87025	7.85189	11.106	16.1334	22.8324	34.2203	60.5044
0.125008	0.246094	0.282501	0.348029	0.412166	0.492188	0.53848	0.599938	0.674046	0.778217	0.855281	0.984375	1.10056	1.25484	1.43496	1.55643	1.89655	2.21484	2.46094	2.99716	3.74839	4.77828	5.89601	7.93628	11.1288	16.2315	22.8655	34.2387	60.6061
0.125153	0.246094	0.282851	0.348029	0.413572	0.492188	0.539711	0.600354	0.677927	0.778217	0.864952	0.984375	1.10056	1.25484	1.43496	1.55643	1.9177	2.21484	2.46556	3.04401	3.74839	4.78182	5.93335	7.95756	11.1858	16.2449	22.8655	34.3519	60.6998
0.125282	0.246094	0.283044	0.348029	0.414441	0.492188	0.544973	0.601041	0.682383	0.778217	0.868204	0.984375	1.10056	1.25484	1.43496	1.55643	1.92205	2.22373	2.46612	3.04401	3.74924	4.78398	5.94712	8.03698	11.1939	16.2731	22.888	34.3519	60.7109
0.125936	0.246094	0.283662	0.348029	0.414686	0.492188	0.545099	0.607628	0.686882	0.778217	0.873679	0.984375	1.10056	1.25484	1.43496	1.55643	1.92205	2.22847	2.47321	3.0458	3.75363	4.80073	5.95221	8.09495	11.2344	16.2959	22.892	34.4662	61.1839
0.126006	0.246094	0.283693	0.348029	0.415849	0.492188	0.546079	0.608948	0.688901	0.778217	0.877021	0.984375	1.10056	1.25484	1.43496	1.56572	1.92205	2.24112	2.48677	3.0502	3.75363	4.80892	5.95221	8.10852	11.2694	16.3407	22.9936	34.5111	61.2701
0.126335	0.246094	0.283762	0.348029	0.41666	0.492188	0.550282	0.614936	0.690257	0.778217	0.879456	0.984375	1.10056	1.25484	1.4369	1.56976	1.92617	2.24863	2.49564	3.11156	3.76451	4.81249	5.96759	8.14715	11.3123	16.4025	23.0143	34.5488	61.5397
0.126408	0.246094	0.2839	0.348029	0.418122	0.492188	0.550282	0.616533	0.69304	0.778217	0.881209	0.985162	1.10056	1.25484	1.43887	1.57436	1.93696	2.25361	2.50967	3.12435	3.76903	4.82625	6.00612	8.25424	11.3444	16.4555	23.0704	34.5663	62.1098
0.12674	0.246094	0.285498	0.348029	0.42343	0.492188	0.550282	0.616791	0.693133	0.778217	0.88375	0.991675	1.10056	1.25484	1.44649	1.57577	1.94054	2.25362	2.50967	3.12963	3.8204	4.83807	6.03758	8.30179	11.355	16.5762	23.1498	34.6013	62.1639
0.126982	0.246094	0.286473	0.348029	0.423806	0.492188	0.550282	0.618326	0.696058	0.778217	0.88637	1.00982	1.1093	1.25484	1.44829	1.57577	1.94653	2.25366	2.51476	3.13226	3.8444	4.83914	6.03915	8.34025	11.4718	16.6191	23.1655	34.7071	62.188
0.127085	0.246094	0.286941	0.348029	0.42471	0.492188	0.550282	0.618714	0.696058	0.784393	0.887304	1.01467	1.11435	1.25484	1.45033	1.57577	1.96223	2.25654	2.53787	3.13698	3.85198	4.84911	6.07807	8.36768	11.4797	16.6418	23.1825	34.8538	62.547
0.127689	0.246094	0.288538	0.348029	0.427743	0.492188	0.550282	0.619755	0.696058	0.784393	0.887304	1.01467	1.1173	1.25484	1.45598	1.57577	1.96863	2.25699	2.54388	3.14289	3.93003	4.85373	6.07807	8.39666	11.5271	16.7199	23.1969	34.9132	62.5627
0.128	0.246094	0.289381	0.348029	0.428272	0.492188	0.550282	0.625111	0.696058	0.784393	0.887304	1.01467	1.11856	1.25484	1.45654	1.57577	1.96875	2.2615	2.55586	3.15517	3.93342	4.90924	6.08094	8.3997	11.5349	16.7507	23.2659	35.1432	62.582
0.128111	0.246094	0.2898	0.348029	0.432445	0.492188	0.550282	0.626173	0.696058	0.784393	0.887304	1.01467	1.11997	1.25888	1.45962	1.57577	1.96875	2.26887	2.56929	3.15868	4.00612	4.91529	6.08802	8.42489	11.5812	16.7958	23.3019	35.1578	62.7632
0.128568	0.246094	0.289802	0.348029	0.433349	0.492188	0.550282	0.62798	0.69798	0.78566	0.887304	1.01467	1.13614	1.25985	1.46422	1.57854	1.96875	2.26887	2.59041	3.15905	4.01332	4.92072	6.11563	8.48577	11.5847	16.821	23.3355	35.2299	62.8068
0.128604	0.246094	0.28985	0.348029	0.433972	0.492188	0.550282	0.628192	0.698977	0.78595	0.887304	1.01467	1.15075	1.2648	1.46966	1.59347	1.96875	2.26887	2.5956	3.19286	4.01856	4.93022	6.119	8.60976	11.5888	16.8803	23.3595	35.3391	62.9303
0.128719	0.246094	0.290029	0.348029	0.435092	0.492188	0.550282	0.628872	0.700539	0.786151	0.887304	1.01612	1.15598	1.2661	1.47539	1.5942	1.97942	2.26887	2.62509	3.19922	4.04592	4.94468	6.15234	8.72853	11.6317	16.8851	23.4174	35.3979	63.0563
0.128936	0.246094	0.29149	0.348029	0.435467	0.492188	0.550282	0.628923	0.701583	0.786393	0.887304	1.01967	1.1573	1.26769	1.47656	1.60206	1.98407	2.26887	2.64796	3.20867	4.0539	4.96749	6.15234	8.73893	11.6703	16.9018	23.4307	35.5188	63.0812
0.128954	0.246094	0.292405	0.348029	0.436639	0.492188	0.550282	0.630839	0.701619	0.787662	0.887304	1.02272	1.16775	1.26829	1.47656	1.60215	1.98407	2.26887	2.65051	3.21371	4.05868	4.99035	6.18281	8.76315	11.6992	16.9233	23.5245	35.5748	63.1124
0.129289	0.246094	0.2925	0.348029	0.437252	0.492188	0.550282	0.632737	0.705295	0.788401	0.887304	1.02721	1.17016	1.27601	1.49421	1.62596	1.98407	2.26887	2.66191	3.23414	4.06251	4.99283	6.22098	8.80299	11.6992	16.9389	23.552	35.6052	63.1346
0.12957	0.246094	0.292529	0.348029	0.437382	0.492188	0.550282	0.635139	0.708308	0.789714	0.887304	1.03941	1.17249	1.28712	1.49693	1.63139	2.02934	2.27055	2.69721	3.23478	4.07358	5.0147	6.26452	8.83467	11.8151	16.9803	23.5531	35.685	63.2748
0.129742	0.246094	0.292608	0.348029	0.440435	0.492188	0.550282	0.639403	0.712123	0.790093	0.887304	1.04161	1.17576	1.29255	1.49693	1.65085	2.02934	2.29471	2.69776	3.23507	4.09947	5.04378	6.27418	8.85124	11.8352	16.9876	23.5627	35.8495	63.3339
0.130146	0.246094	0.293323	0.348029	0.440799	0.492188	0.550282	0.642934	0.714484	0.793412	0.89023	1.04182	1.17905	1.29549	1.49693	1.65391	2.02934	2.30347	2.71819	3.25044	4.11362	5.04888	6.30788	8.87304	11.8468	17.057	23.616	35.906	63.4927
0.130155	0.246094	0.293581	0.348029	0.441111	0.492188	0.550282	0.644012	0.71748	0.7935	0.891334	1.04409	1.18436	1.30383	1.49693	1.65797	2.04937	2.32164	2.71884	3.25441	4.12528	5.04942	6.33649	8.89349	11.879	17.057	23.6224	35.929	63.8328
0.130202	0.246094	0.293747	0.348029	0.441123	0.492188	0.550282	0.644676	0.719049	0.795807	0.893913	1.04409	1.189	1.31059	1.52445	1.67043	2.0618	2.33142	2.7227	3.2833	4.19083	5.05337	6.34023	8.92513	11.8866	17.0676	23.6739	36.09	63.8897
0.131489	0.246094	0.293952	0.348029	0.441151	0.492188	0.550282	0.645835	0.72226	0.79799	0.894346	1.04409	1.18923	1.31677	1.52604	1.67107	2.06834	2.33281	2.73977	3.29263	4.19083	5.06829	6.37111	8.92772	11.9374	17.0676	23.6946	36.1395	63.9787
0.131588	0.246094	0.294285	0.348029	0.441186	0.492188	0.550282	0.650099	0.726723	0.799097	0.894346	1.04409	1.19124	1.31793	1.5267	1.67136	2.07625	2.33465	2.74319	3.30854	4.19083	5.07335	6.43785	8.9478	11.9374	17.0729	23.746	36.195	64.1281
0.131817	0.246094	0.294512	0.348552	0.441639	0.492188	0.550282	0.650219	0.72732	0.80675	0.909442	1.04409	1.19403	1.32526	1.53864	1.67426	2.08104	2.33465	2.7452	3.32146	4.19093	5.07335	6.47806	8.95174	12.0447	17.0761	23.7643	36.2285	64.2837
0.131994	0.246094	0.294587	0.350216	0.442189	0.492188	0.550282	0.652971	0.73306	0.807771	0.912426	1.04409	1.20029	1.32526	1.53889	1.68823	2.09229	2.33465	2.75077	3.36396	4.1992	5.10894	6.47924	9.15088	12.0909	17.1028	23.8152	36.2368	64.2837
0.132163	0.246094	0.295295	0.350791	0.443996	0.492188	0.550282	0.65354	0.735518	0.808855	0.914573	1.04409	1.20803	1.32526	1.54262	1.69856	2.1017	2.34007	2.75141	3.37099	4.19966	5.12088	6.49706	9.24736	12.1113	17.2373	23.8914	36.2498	64.5484
0.1326	0.246094	0.295396	0.350791	0.444632	0.492188	0.550282	0.653813	0.73599	0.810408	0.915848	1.04409	1.21003	1.32526	1.54295	1.69997	2.10263	2.3473	2.75141	3.39836	4.20525	5.14687	6.53887	9.26372	12.3145	17.2548	23.9189	36.2552	64.7792
0.134841	0.246094	0.297159	0.350899	0.446828	0.492188	0.550282	0.656373	0.73699	0.811447	0.918467	1.04409	1.21056	1.32526	1.54818	1.72266	2.10263	2.34889	2.75141	3.39902	4.22409	5.15418	6.53887	9.27679	12.3288	17.2696	23.9976	36.362	65.2413
0.135168	0.246094	0.297703	0.351178	0.447021	0.493394	0.550282	0.657338	0.737444	0.814296	0.918717	1.04409	1.21404	1.32526	1.54931	1.72266	2.10263	2.37414	2.79266	3.41691	4.24305	5.15681	6.54753	9.27679	12.393	17.2705	24.0543	36.3903	65.3498
0.135186	0.246094	0.297827	0.352395	0.448725	0.493667	0.550282	0.657836	0.738281	0.814711	0.923811	1.04409	1.21762	1.32526	1.54957	1.72266	2.11698	2.37477	2.79341	3.42263	4.25497	5.19302	6.61872	9.328	12.393	17.3223	24.0682	36.4302	65.4454
0.136227	0.246094	0.299381	0.354186	0.448888	0.494503	0.550282	0.658058	0.738281	0.815976	0.928091	1.04411	1.224	1.32919	1.55643	1.74015	2.11698	2.3791	2.8059	3.42769	4.28692	5.22044	6.61924	9.40323	12.5411	17.4049	24.141	36.4767	65.9173
0.136397	0.246094	0.299435	0.354195	0.450249	0.495222	0.550282	0.660238	0.738281	0.817493	0.928135	1.04793	1.23047	1.33442	1.55643	1.74015	2.12049	2.41337	2.8059	3.42769	4.29445	5.23202	6.62628	9.41932	12.5725	17.431	24.1937	36.5497	65.9187
0.138057	0.246094	0.300348	0.354323	0.452541	0.496094	0.550282	0.661823	0.738281	0.817512	0.931111	1.05217	1.23047	1.33577	1.55643	1.74015	2.13195	2.4159	2.84309	3.42769	4.29524	5.24355	6.62924	9.43217	12.7043	17.438	24.2374	36.5541	66.0311
0.138639	0.246094	0.300943	0.355906	0.4528	0.496382	0.550282	0.661969	0.738281	0.819084	0.933033	1.05593	1.23047	1.34532	1.55643	1.74015	2.14078	2.42374	2.84496	3.43637	4.2961	5.247	6.65173	9.45461	12.7062	17.4513	24.362	36.6622	66.5714
0.138773	0.246094	0.301047	0.357619	0.45323	0.497605	0.550282	0.661991	0.738281	0.820737	0.935312	1.06723	1.23047	1.34823	1.55643	1.74015	2.1413	2.42374	2.84854	3.43694	4.29784	5.26664	6.66274	9.48241	12.7138	17.521	24.4241	36.7133	66.651
0.138803	0.246094	0.3016	0.358155	0.453518	0.498552	0.550282	0.667379	0.738281	0.825075	0.941074	1.07978	1.23047	1.35149	1.55643	1.74015	2.15422	2.42374	2.85018	3.46654	4.30112	5.27329	6.70186	9.48429	12.8427	17.5263	24.5115	36.8373	67.115
0.138876	0.246094	0.302897	0.358318	0.454226	0.498948	0.550282	0.667643	0.738281	0.825411	0.942169	1.0818	1.23047	1.35688	1.55744	1.74015	2.15658	2.42374	2.88045	3.47252	4.30202	5.29904	6.7476	9.49616	12.8559	17.5315	24.5995	36.8582	67.1777
0.13904	0.246094	0.303032	0.359445	0.456519	0.499991	0.551194	0.668555	0.738281	0.826877	0.945736	1.08481	1.23047	1.36271	1.55959	1.76282	2.15688	2.4283	2.88045	3.48029	4.30241	5.32254	6.79678	9.50572	12.9123	17.6688	24.7174	36.9141	67.4626
0.139422	0.246094	0.304662	0.3607	0.456587	0.500825	0.551507	0.669304	0.738281	0.827002	0.959055	1.08618	1.23047	1.37285	1.56298	1.76865	2.15927	2.45086	2.88045	3.51105	4.32191	5.3423	6.82439	9.52965	12.9193	17.7461	24.7786	37.0561	67.5032
0.139858	0.246094	0.304695	0.361652	0.456995	0.50102	0.553511	0.672042	0.738281	0.82762	0.961799	1.09211	1.23047	1.37396	1.56369	1.76934	2.1734	2.46094	2.93119	3.52353	4.36147	5.3546	6.83769	9.58503	12.9414	17.815	24.8197	37.0622	67.5397
0.140252	0.246094	0.305167	0.362695	0.457205	0.50115	0.553907	0.673702	0.738281	0.830499	0.963409	1.09352	1.23047	1.38547	1.57134	1.77461	2.20113	2.4678	2.93143	3.52491	4.36823	5.37494	6.84002	9.58503	13.0314	17.8227	24.8902	37.0696	67.575
0.140501	0.246094	0.306323	0.364395	0.461224	0.501634	0.553992	0.67692	0.739156	0.831425	0.970917	1.0936	1.2315	1.3902	1.57501	1.78083	2.20113	2.47321	2.94352	3.52815	4.37116	5.39284	6.86064	9.72458	13.1078	17.8409	24.9336	37.0949	67.9384
0.140816	0.246094	0.306558	0.365353	0.464249	0.50205	0.55465	0.680308	0.739424	0.835982	0.974981	1.09856	1.23332	1.3906	1.57577	1.78869	2.20113	2.49197	2.9471	3.52913	4.38781	5.39629	6.86277	9.73549	13.1915	17.8566	25.1064	37.1054	68.3933
0.140889	0.246094	0.30669	0.367388	0.465295	0.503984	0.55465	0.680944	0.74263	0.838529	0.975715	1.09906	1.23375	1.39143	1.57577	1.79159	2.20113	2.49284	2.95312	3.53361	4.3954	5.39726	6.89845	9.74482	13.2891	17.9159	25.1991	37.1569	68.4499
0.141046	0.246094	0.30691	0.370004	0.465622	0.505626	0.555475	0.683118	0.743902	0.850764	0.984375	1.10056	1.24023	1.39212	1.57577	1.79159	2.20113	2.50583	2.95653	3.58318	4.40406	5.40877	6.90818	9.75103	13.3822	17.9281	25.2202	37.2074	68.4709
0.141258	0.246094	0.307292	0.370173	0.466795	0.510758	0.561495	0.694304	0.744141	0.852471	0.984375	1.10056	1.25181	1.39212	1.57577	1.80065	2.20472	2.50967	2.96336	3.61725	4.41979	5.40932	6.9953	9.77538	13.4023	17.9791	25.2375	37.2203	68.6651
0.141468	0.246094	0.30821	0.370229	0.467184	0.510842	0.561552	0.695684	0.756283	0.85619	0.984375	1.10056	1.25212	1.39212	1.57577	1.80852	2.21124	2.51481	2.96336	3.62373	4.42321	5.42504	7.00395	9.80677	13.4539	18.0237	25.3082	37.2986	68.6897
0.141597	0.246094	0.30911	0.370395	0.467556	0.514039	0.561657	0.696058	0.763959	0.862723	0.984375	1.10056	1.25257	1.39431	1.57941	1.81249	2.21484	2.53369	2.96336	3.63284	4.43552	5.42893	7.10298	9.83452	13.4602	18.0992	25.4051	37.309	68.9682
0.142089	0.246094	0.309224	0.370565	0.467867	0.515432	0.563101	0.696058	0.765242	0.865526	0.984375	1.10056	1.25329	1.39432	1.58306	1.81478	2.22356	2.56034	2.9676	3.68984	4.45544	5.44532	7.15367	9.89285	13.4902	18.3196	25.4383	37.3625	69.5543
0.142129	0.246094	0.31105	0.373767	0.469021	0.516251	0.563329	0.696058	0.767175	0.867176	0.984375	1.10056	1.25484	1.4133	1.5891	1.81602	2.22847	2.56929	2.97356	3.6996	4.45695	5.46417	7.15367	9.92036	13.562	18.3351	25.4478	37.3625	69.81
0.142258	0.246094	0.311367	0.373846	0.471064	0.516777	0.565003	0.696058	0.768452	0.871236	0.987194	1.10056	1.25484	1.41463	1.58913	1.82206	2.22847	2.58672	2.97415	3.70057	4.46649	5.46901	7.16636	9.96604	13.6025	18.3798	25.4633	37.3749	69.8252
0.14304	0.246094	0.31183	0.374022	0.47264	0.517111	0.567388	0.696058	0.771336	0.878988	0.991605	1.10056	1.25484	1.41796	1.59816	1.8309	2.23242	2.60451	2.98204	3.72729	4.50047	5.4993	7.18693	9.97211	13.7488	18.4131	25.5707	37.4071	70.3711
0.143474	0.246094	0.312217	0.375816	0.472652	0.518478	0.568255	0.696058	0.771568	0.880929	0.995637	1.10056	1.25484	1.41882	1.61222	1.83582	2.23863	2.61601	2.99386	3.74154	4.51075	5.50282	7.19209	10.0176	13.7571	18.4833	25.6769	37.4459	70.6713
0.143697	0.246094	0.313014	0.375926	0.475638	0.518575	0.570849	0.696058	0.772828	0.883387	1.01021	1.10114	1.25484	1.42456	1.61908	1.86413	2.23996	2.61977	2.99386	3.75363	4.51701	5.50282	7.22351	10.0447	13.7834	18.498	25.8092	37.4811	70.6872
0.14371	0.246094	0.315349	0.376148	0.475771	0.520626	0.571678	0.696058	0.778217	0.884883	1.01467	1.1074	1.25484	1.4256	1.62163	1.87419	2.24671	2.64699	2.99386	3.75779	4.52438	5.53434	7.23738	10.0701	13.79	18.498	25.8445	37.5976	70.7491
0.14378	0.246094	0.315527	0.37673	0.47698	0.520838	0.573133	0.696058	0.778217	0.887304	1.01467	1.10855	1.25484	1.43222	1.63131	1.87433	2.26887	2.65029	3.04401	3.76451	4.53774	5.5465	7.23783	10.1168	13.8853	18.5274	25.8488	37.6234	70.8094
0.144661	0.246094	0.315578	0.377026	0.477327	0.520849	0.573884	0.696058	0.778217	0.887304	1.01467	1.12748	1.25484	1.43496	1.63622	1.87772	2.26887	2.65051	3.04401	3.79039	4.53774	5.55424	7.26762	10.1168	13.9988	18.5628	25.8601	37.6408	71.0909
0.1449	0.246094	0.317147	0.377249	0.478275	0.521661	0.577498	0.696058	0.778217	0.887304	1.01467	1.13604	1.25484	1.43496	1.644	1.88908	2.26887	2.65051	3.04401	3.8204	4.54543	5.57933	7.38691	10.142	14.0941	18.6399	25.9428	38.0054	71.8838
0.145646	0.246094	0.317547	0.377477	0.48124	0.523397	0.582369	0.69609	0.778217	0.887304	1.01467	1.14591	1.25484	1.43496	1.65085	1.89962	2.26887	2.65051	3.04898	3.84401	4.55233	5.6118	7.40329	10.1509	14.1632	18.6545	26.1022	38.189	71.9672
0.14571	0.246094	0.318151	0.378181	0.482387	0.525056	0.587173	0.698928	0.778217	0.887304	1.01467	1.14708	1.2648	1.43496	1.65085	1.92205	2.26887	2.65051	3.05788	3.85198	4.56262	5.61795	7.45066	10.1738	14.2692	18.7419	26.1022	38.204	71.9823
0.146106	0.246094	0.318939	0.378612	0.482778	0.525581	0.587819	0.699792	0.778217	0.887304	1.01467	1.14721	1.26535	1.43496	1.65085	1.92205	2.27116	2.66191	3.08355	3.87028	4.57376	5.64879	7.48484	10.1973	14.2858	18.8659	26.2122	38.2219	72.0113
0.14674	0.246094	0.319575	0.378857	0.482804	0.526504	0.587881	0.701583	0.778217	0.887304	1.01467	1.15419	1.27548	1.43496	1.65085	1.92863	2.29026	2.66429	3.08429	3.89221	4.58964	5.66016	7.52902	10.3037	14.4085	18.867	26.226	38.3188	72.6308
0.146782	0.246094	0.321102	0.378881	0.484324	0.526525	0.588729	0.705541	0.778217	0.887304	1.01467	1.15896	1.27605	1.43496	1.65688	1.95693	2.29031	2.66603	3.10483	3.90597	4.6038	5.68152	7.52902	10.3476	14.4443	18.874	26.2967	38.3382	72.7208
0.147532	0.246094	0.321518	0.379885	0.488223	0.53007	0.588797	0.708027	0.778217	0.887304	1.01652	1.16407	1.27626	1.43496	1.665	1.96186	2.29178	2.69666	3.13757	3.94518	4.60789	5.68152	7.52956	10.3506	14.4694	18.9665	26.4222	38.4084	72.7643
0.148473	0.246094	0.323201	0.381333	0.492188	0.531632	0.588837	0.708693	0.778217	0.887304	1.02174	1.16887	1.27984	1.43496	1.66589	1.96875	2.31267	2.69879	3.15102	3.97412	4.60914	5.68152	7.57396	10.3506	14.5383	18.9748	26.5642	38.5072	72.8142
0.14848	0.246094	0.325166	0.382602	0.492188	0.532047	0.592707	0.711164	0.778217	0.887304	1.02423	1.17954	1.28723	1.43496	1.67389	1.96875	2.31383	2.70703	3.15154	3.9778	4.61438	5.69168	7.71595	10.3617	14.6203	18.9987	26.5895	38.5182	72.9331
0.148869	0.246094	0.326566	0.382656	0.492188	0.532558	0.596439	0.712597	0.778217	0.887304	1.03581	1.18743	1.30032	1.43496	1.68356	1.97191	2.31552	2.70703	3.15846	3.97936	4.62186	5.69991	7.76201	10.3827	14.6214	19.0703	26.6918	38.5268	73.1379
0.149282	0.246094	0.329515	0.383437	0.492188	0.532616	0.596817	0.712816	0.778217	0.887304	1.03839	1.19226	1.31316	1.43875	1.72071	1.98398	2.32164	2.71038	3.16694	3.98093	4.62684	5.74512	7.77049	10.3887	14.7266	19.1653	26.6929	38.7439	73.1392
0.149338	0.246094	0.330389	0.383615	0.492188	0.535787	0.597733	0.713643	0.778217	0.887304	1.04011	1.19374	1.31318	1.44335	1.72266	1.98407	2.32164	2.71819	3.17182	4.00111	4.62865	5.74512	7.78217	10.4535	14.743	19.2095	26.7462	38.8454	73.2079
0.149427	0.246094	0.33264	0.383733	0.492188	0.537152	0.600486	0.714075	0.778217	0.887304	1.04057	1.19688	1.31789	1.446	1.72266	1.98407	2.3253	2.73753	3.19922	4.00612	4.66608	5.80802	7.78217	10.4826	14.7516	19.2205	26.8453	38.8898	73.7705
0.150575	0.246094	0.336334	0.385321	0.492188	0.53934	0.601671	0.714785	0.778217	0.888322	1.04409	1.19705	1.31974	1.44658	1.72906	1.98407	2.33465	2.74008	3.19922	4.01482	4.66922	5.84958	7.79907	10.4982	14.8658	19.2552	26.8513	38.8969	73.8264
0.150718	0.246094	0.336944	0.385762	0.492188	0.539344	0.605191	0.715854	0.778217	0.889024	1.04409	1.19846	1.32049	1.45098	1.7352	1.98407	2.33465	2.74567	3.20867	4.01572	4.67578	5.84958	7.83216	10.5677	14.8983	19.3317	26.9863	38.9078	73.8618
0.151119	0.246094	0.336946	0.388228	0.492188	0.540213	0.608547	0.717709	0.778217	0.88965	1.04409	1.19854	1.32526	1.45477	1.74015	1.98407	2.33465	2.75141	3.21478	4.02258	4.68119	5.84958	7.83333	10.5706	14.9031	19.3853	27.0412	38.9925	74.1068
0.151195	0.246094	0.336988	0.388447	0.492188	0.542882	0.608779	0.719356	0.778217	0.894346	1.05034	1.20361	1.32526	1.46703	1.74015	1.98407	2.33465	2.75141	3.22409	4.04806	4.68309	5.89601	7.875	10.5849	14.945	19.4476	27.1106	39.0137	74.3207
0.151259	0.246094	0.339148	0.392439	0.492188	0.544445	0.609383	0.722119	0.778217	0.897935	1.05252	1.21659	1.32526	1.46739	1.74015	1.98407	2.33465	2.76848	3.23414	4.10618	4.68394	5.90625	7.87884	10.5849	15.0553	19.5408	27.1117	39.0511	74.3701
0.151488	0.246094	0.340197	0.393967	0.492188	0.544647	0.611433	0.730315	0.778217	0.903431	1.06201	1.21691	1.32526	1.47656	1.74015	1.98407	2.33609	2.78269	3.25436	4.11332	4.71589	5.91137	7.90442	10.5935	15.0636	19.5672	27.1767	39.0855	74.4034
0.151575	0.246094	0.341048	0.393998	0.492188	0.545907	0.612167	0.732859	0.778217	0.906423	1.06356	1.21738	1.32526	1.47656	1.74015	2.01572	2.33753	2.78444	3.25897	4.12528	4.72145	5.9165	7.93353	10.5957	15.1102	19.569	27.312	39.1035	74.529
0.151623	0.246094	0.34106	0.394215	0.492188	0.547249	0.61309	0.733193	0.778217	0.910414	1.06829	1.2221	1.33123	1.47656	1.75362	2.02934	2.34011	2.78993	3.27501	4.15206	4.72731	5.92063	7.93628	10.6249	15.1403	19.5744	27.3507	39.1049	74.6389
0.151721	0.246094	0.341614	0.394507	0.492188	0.547781	0.61422	0.734263	0.779725	0.915086	1.06914	1.22256	1.33339	1.4793	1.77461	2.02934	2.34085	2.79509	3.2833	4.1525	4.73302	5.94712	7.93628	10.6575	15.1483	19.6256	27.3873	39.1235	75.0457
0.151874	0.246094	0.341908	0.394834	0.492188	0.54992	0.615589	0.735118	0.779933	0.916278	1.07128	1.22488	1.33696	1.48162	1.77461	2.02934	2.35437	2.79647	3.2833	4.15802	4.74715	5.94712	7.93628	10.676	15.1563	19.7013	27.5207	39.1372	75.2922
0.152605	0.246094	0.342246	0.394918	0.492188	0.550282	0.619775	0.7364	0.781057	0.919479	1.07131	1.22604	1.34511	1.48397	1.77461	2.04185	2.36258	2.8059	3.31569	4.17145	4.77121	5.95221	7.98573	10.6846	15.1623	19.729	27.5706	39.4257	76.0923
0.152947	0.246094	0.342247	0.395797	0.492188	0.550282	0.621174	0.736599	0.783835	0.924393	1.07209	1.23047	1.34547	1.48459	1.77461	2.05453	2.36262	2.8059	3.32127	4.17236	4.77828	5.95221	8.01601	10.6846	15.1997	19.7566	27.7731	39.4682	76.2852
0.153081	0.246094	0.342261	0.396936	0.492188	0.550282	0.622493	0.737556	0.784393	0.925437	1.08036	1.23047	1.3484	1.4846	1.77461	2.05818	2.39018	2.8059	3.3279	4.18742	4.8162	5.95444	8.04936	10.7213	15.2895	19.9867	27.777	39.5323	76.3962
0.153283	0.246094	0.342366	0.398347	0.492188	0.550282	0.625165	0.738281	0.788997	0.926041	1.08177	1.23047	1.34922	1.49226	1.77461	2.09051	2.41407	2.8059	3.33213	4.21429	4.81852	5.98772	8.06121	10.8197	15.3133	20.0003	27.8162	39.6547	76.4176
0.153375	0.246094	0.344232	0.398526	0.492188	0.550282	0.627093	0.738281	0.789617	0.926151	1.08195	1.23047	1.35169	1.49447	1.77461	2.10162	2.41849	2.8059	3.34568	4.24824	4.81926	5.99277	8.09495	10.8305	15.3172	20.0306	27.8782	40.0377	76.532
0.153391	0.246094	0.344574	0.399346	0.492188	0.550282	0.635561	0.738281	0.790768	0.937237	1.10056	1.23047	1.35254	1.49672	1.77461	2.10263	2.42374	2.81265	3.3569	4.24824	4.81991	6.03306	8.10061	10.8309	15.3453	20.0729	27.9563	40.0702	76.5511
0.153639	0.246094	0.344924	0.39967	0.492188	0.550282	0.638838	0.738281	0.792022	0.942088	1.10056	1.23047	1.35409	1.49693	1.77736	2.10263	2.42374	2.82651	3.44598	4.2516	4.82616	6.04627	8.13599	10.8398	15.421	20.0822	28.0626	40.0746	76.5779
0.154452	0.246094	0.346083	0.400009	0.492188	0.550282	0.64252	0.738281	0.795513	0.947524	1.10056	1.23047	1.3546	1.49693	1.78225	2.10263	2.42374	2.8344	3.45489	4.26656	4.84052	6.07807	8.25424	10.8728	15.4256	20.1647	28.1906	40.4436	76.5822
0.154991	0.246094	0.348029	0.400111	0.492188	0.550282	0.643253	0.738281	0.801953	0.947863	1.10056	1.23047	1.35519	1.49693	1.78869	2.10263	2.4362	2.84576	3.45678	4.2717	4.90641	6.07807	8.25424	10.8978	15.4279	20.2104	28.2333	40.8026	76.617
0.15511	0.246094	0.348029	0.40112	0.492188	0.550282	0.644435	0.738281	0.80612	0.951923	1.10056	1.23047	1.35621	1.49693	1.79159	2.10263	2.45348	2.85072	3.46329	4.27275	4.92215	6.14103	8.36719	10.9006	15.5215	20.4273	28.2408	40.9695	76.6336
0.155466	0.246094	0.348029	0.402379	0.492188	0.550282	0.645706	0.738281	0.806318	0.952459	1.10056	1.23093	1.36306	1.49719	1.79159	2.10263	2.45365	2.85198	3.48029	4.28195	4.93894	6.15234	8.37481	10.9006	15.5878	20.4317	28.2494	41.409	76.8447
0.155674	0.246094	0.348029	0.40262	0.492188	0.550282	0.64806	0.738281	0.809745	0.953281	1.10056	1.23227	1.36361	1.50528	1.80201	2.11621	2.46039	2.8682	3.48029	4.2874	4.94195	6.16709	8.42489	10.9283	15.7807	20.438	28.2622	41.4768	76.8712
0.156067	0.246094	0.348029	0.404429	0.492188	0.550282	0.648125	0.738281	0.811329	0.956758	1.10056	1.23415	1.36992	1.51531	1.80312	2.11698	2.46066	2.86992	3.49354	4.28857	4.94642	6.172	8.48577	10.9753	15.8295	20.4567	28.4086	41.5056	76.9711
0.156391	0.246094	0.348029	0.406203	0.492188	0.550282	0.648579	0.738281	0.813288	0.962354	1.10056	1.24767	1.38416	1.5262	1.8077	2.13654	2.46094	2.86992	3.50791	4.29784	4.97627	6.17595	8.49647	10.9864	15.8439	20.4894	28.62	41.6393	76.9739
0.157028	0.246094	0.348029	0.406471	0.492188	0.550282	0.649173	0.738281	0.813417	0.96393	1.10056	1.24959	1.38716	1.52744	1.81282	2.14483	2.46774	2.88045	3.51144	4.29784	5.01759	6.21113	8.50004	11.0056	15.8731	20.5455	28.633	41.7229	77.0085
0.157054	0.246094	0.348029	0.407033	0.492188	0.550282	0.649326	0.738281	0.81511	0.974856	1.10056	1.25227	1.38966	1.52834	1.82387	2.15749	2.49048	2.88045	3.51433	4.29784	5.01795	6.22573	8.58511	11.0194	15.8821	20.5455	28.8348	41.8801	77.1946
0.157463	0.246094	0.348029	0.407518	0.492188	0.550282	0.64947	0.738281	0.81703	0.977848	1.10056	1.25301	1.39195	1.52987	1.82991	2.16998	2.50878	2.88823	3.53024	4.30391	5.03001	6.23216	8.58511	11.0194	15.9394	20.6088	28.877	42.2176	77.2315
0.157703	0.246094	0.348029	0.408551	0.495756	0.550282	0.650741	0.738281	0.817555	0.982131	1.10056	1.25419	1.39212	1.54346	1.83247	2.17693	2.50967	2.89086	3.53124	4.30716	5.04716	6.25397	8.59569	11.0304	15.9549	20.6396	29.0484	42.5749	77.4367
0.158305	0.246094	0.348029	0.408766	0.496094	0.550282	0.654651	0.738281	0.8275	0.982563	1.11224	1.25451	1.39212	1.54975	1.85552	2.18383	2.50967	2.9001	3.54341	4.3081	5.07335	6.26124	8.60976	11.0485	15.9961	20.6909	29.1098	42.7717	77.527
0.158421	0.246094	0.348029	0.410162	0.496094	0.550282	0.655838	0.738281	0.829679	0.98264	1.1157	1.25484	1.39212	1.553	1.86841	2.18629	2.50967	2.90982	3.54963	4.31355	5.07335	6.27418	8.6168	11.0523	15.9961	20.7917	29.2479	43.0347	77.7303
0.158789	0.246094	0.348029	0.410375	0.496094	0.550282	0.656618	0.738281	0.831021	0.984375	1.12273	1.25484	1.39212	1.55643	1.87419	2.18865	2.51128	2.93432	3.56864	4.31737	5.07335	6.33966	8.65537	11.0605	16.0037	20.8484	29.3089	43.1682	77.7847
0.158794	0.246094	0.348029	0.411676	0.496094	0.550282	0.66186	0.738281	0.835689	0.984375	1.12307	1.25484	1.39677	1.55643	1.87419	2.18866	2.53369	2.95825	3.58266	4.34145	5.10958	6.34923	8.68491	11.1424	16.0197	20.9238	29.375	43.2065	77.7875
0.158986	0.246094	0.348029	0.411843	0.498493	0.550282	0.667413	0.740501	0.835968	0.984375	1.12432	1.25484	1.40051	1.55643	1.87419	2.19494	2.53369	2.96336	3.58318	4.35014	5.12996	6.38422	8.69725	11.1424	16.0698	20.9281	29.4532	43.3975	77.8275
0.159107	0.24676	0.348029	0.411973	0.498806	0.550282	0.667435	0.743458	0.846005	0.984375	1.12691	1.25484	1.40712	1.56084	1.87419	2.20113	2.54055	2.97356	3.58789	4.35332	5.15506	6.38422	8.72158	11.1939	16.1664	20.9411	29.5312	43.7718	78.1489
0.159225	0.247539	0.348029	0.412977	0.501548	0.550282	0.66751	0.751133	0.848374	0.984375	1.1274	1.25484	1.4144	1.57577	1.87419	2.20113	2.54459	2.97356	3.6106	4.36092	5.17257	6.38897	8.72853	11.2344	16.2496	20.9541	29.6222	43.7826	78.1761
0.159398	0.248047	0.348029	0.414399	0.501693	0.550282	0.668866	0.751178	0.851693	0.984375	1.12786	1.25484	1.41882	1.57577	1.87419	2.20113	2.56929	2.97598	3.61499	4.367	5.1876	6.40835	8.78386	11.3077	16.2962	20.9585	29.6336	43.9539	78.2835
0.159861	0.248047	0.348029	0.415774	0.50727	0.550282	0.67217	0.751304	0.857871	0.985477	1.13057	1.25484	1.42155	1.57577	1.87419	2.20757	2.56929	2.99152	3.63911	4.38157	5.20325	6.41734	8.81139	11.3444	16.3711	20.9684	29.8172	44.061	78.4596
0.160839	0.248047	0.348029	0.415774	0.509157	0.550282	0.672227	0.752928	0.858049	0.986781	1.13071	1.25484	1.42659	1.57577	1.87419	2.21484	2.56929	2.99386	3.6481	4.38889	5.2129	6.41734	8.85933	11.355	16.4607	20.9784	29.8863	44.2905	78.529
0.160915	0.248047	0.348029	0.416146	0.509916	0.550282	0.672708	0.753496	0.859977	0.992197	1.13294	1.25484	1.42752	1.57577	1.87419	2.21484	2.58442	2.99413	3.64844	4.39296	5.21463	6.41734	8.86672	11.363	16.474	20.9859	29.9244	44.5164	78.5594
0.160965	0.248047	0.348029	0.416472	0.509949	0.5513	0.676508	0.754699	0.860165	0.992284	1.13365	1.25927	1.43068	1.57577	1.87419	2.21987	2.58513	3.00974	3.65845	4.40226	5.21546	6.45967	8.87304	11.363	16.5176	21.0119	29.9948	44.6888	78.5722
0.160991	0.248047	0.348029	0.416582	0.510231	0.554277	0.676544	0.758999	0.863514	1.00311	1.13564	1.2648	1.43496	1.57918	1.88898	2.22847	2.58773	3.01756	3.65845	4.41467	5.21772	6.48546	8.87304	11.3911	16.5341	21.0988	30.0244	44.7146	78.7596
0.160994	0.24894	0.348029	0.417953	0.511379	0.554597	0.679241	0.76014	0.870849	1.00423	1.13756	1.2778	1.43496	1.59095	1.89484	2.22889	2.60493	3.03466	3.67259	4.43599	5.21956	6.53887	8.87304	11.4412	16.6054	21.1254	30.0879	44.7167	78.8365
0.161491	0.249184	0.348029	0.419205	0.515699	0.55465	0.679788	0.775547	0.872782	1.00468	1.148	1.27821	1.43496	1.59819	1.89541	2.23558	2.61601	3.03624	3.6996	4.43652	5.22044	6.56118	8.89008	11.4612	16.6079	21.1726	30.1422	44.7564	79.3485
0.161539	0.249863	0.348029	0.421129	0.516485	0.55465	0.683666	0.776652	0.87775	1.00814	1.16085	1.28451	1.43496	1.60123	1.9004	2.23632	2.61601	3.03769	3.72407	4.43903	5.27914	6.56435	8.89008	11.5271	16.621	21.4455	30.1965	44.9214	79.619
0.161593	0.250793	0.348029	0.422108	0.516836	0.55465	0.684584	0.778217	0.887304	1.01467	1.17	1.28802	1.43496	1.61367	1.92027	2.24898	2.61601	3.04401	3.72407	4.45695	5.29375	6.57196	8.90308	11.569	16.6755	21.4892	30.2254	44.9227	79.7439
0.161657	0.250911	0.348029	0.42489	0.518917	0.55465	0.685869	0.778217	0.887304	1.01467	1.17579	1.28939	1.43496	1.62323	1.92146	2.25688	2.62544	3.08355	3.7353	4.46888	5.29771	6.57617	8.91729	11.7027	16.6975	21.523	30.2391	45.0287	79.783
0.161694	0.250971	0.348029	0.425345	0.519049	0.554959	0.687571	0.778217	0.887304	1.01467	1.18414	1.29013	1.43496	1.6235	1.92205	2.26887	2.62759	3.08355	3.73693	4.49079	5.30048	6.58323	8.92069	11.7224	16.7126	21.6227	30.3982	45.0701	80.3337
0.16216	0.251027	0.348029	0.426572	0.521606	0.55537	0.689946	0.778217	0.887304	1.01467	1.1848	1.30443	1.43496	1.63553	1.92205	2.26887	2.63677	3.08355	3.74933	4.51603	5.30457	6.61872	8.9478	11.7231	16.7344	21.6367	30.4038	45.1077	80.5689
0.163121	0.251441	0.348029	0.426757	0.525725	0.556647	0.690769	0.778217	0.887304	1.01467	1.18587	1.30573	1.44676	1.64465	1.92205	2.2733	2.66191	3.08715	3.75363	4.52692	5.33912	6.63871	8.9478	11.7578	16.7362	21.7065	30.4172	45.1155	81.389
0.163134	0.251543	0.348029	0.42707	0.5263	0.557513	0.690867	0.778217	0.887304	1.01467	1.19023	1.31619	1.45398	1.65081	1.92205	2.27366	2.66191	3.11287	3.76621	4.53774	5.35821	6.64565	8.95795	11.7637	16.794	21.7135	30.7095	45.1507	81.5328
0.163506	0.251737	0.348029	0.42721	0.52689	0.558221	0.696058	0.778217	0.887304	1.01467	1.19202	1.31703	1.456	1.65085	1.93713	2.28851	2.67831	3.12574	3.76892	4.53774	5.37753	6.64787	8.95795	11.7761	16.8144	21.7247	30.7617	45.204	81.5358
0.163881	0.25285	0.348029	0.429261	0.527006	0.5602	0.696058	0.778217	0.887304	1.01467	1.19285	1.31983	1.45728	1.65085	1.94437	2.30234	2.689	3.13226	3.77239	4.53774	5.43604	6.66488	9.02866	11.8224	16.8454	21.7247	30.8649	45.3268	81.7524
0.16427	0.25327	0.348029	0.429356	0.527062	0.563602	0.696058	0.778217	0.887304	1.01467	1.1929	1.32066	1.45844	1.65085	1.96857	2.30638	2.71819	3.13226	3.78898	4.56773	5.44752	6.71705	9.07405	11.9374	16.8709	21.7456	30.8943	45.3738	81.7909
0.165062	0.253394	0.348029	0.429435	0.527634	0.564574	0.696058	0.778217	0.887304	1.01467	1.20417	1.32224	1.46012	1.65085	1.96875	2.3111	2.71819	3.13401	3.8204	4.57371	5.45092	6.74951	9.12678	12.0686	16.8803	21.7604	30.921	45.4813	82.0116
0.165067	0.253905	0.348029	0.43174	0.527763	0.565629	0.696058	0.778217	0.887304	1.01467	1.20577	1.32526	1.46101	1.65085	1.96875	2.31742	2.71819	3.15388	3.8204	4.59634	5.46417	6.77093	9.13535	12.1212	16.8875	21.8248	31.0054	45.512	82.0211
0.165279	0.254025	0.348029	0.433265	0.52777	0.566969	0.696058	0.778217	0.887304	1.01467	1.21327	1.32526	1.46414	1.65085	1.96875	2.31868	2.72285	3.16361	3.8204	4.59971	5.48679	6.78234	9.15852	12.2982	16.8875	21.9791	31.0517	45.625	82.8426
0.165737	0.254054	0.348029	0.433765	0.530755	0.567466	0.696058	0.778217	0.887304	1.01467	1.22299	1.32526	1.47656	1.65085	1.96875	2.32164	2.75141	3.20867	3.8225	4.60251	5.48781	6.7888	9.16887	12.4149	16.9012	22.0301	31.1278	45.6508	83.7979
0.16592	0.254084	0.348029	0.434106	0.531234	0.568959	0.696058	0.778217	0.887924	1.01781	1.23047	1.32526	1.47656	1.65303	1.96875	2.32164	2.75141	3.20867	3.83354	4.60796	5.49387	6.79927	9.19075	12.4758	16.9876	22.1333	31.2163	45.6936	83.9411
0.166208	0.254646	0.348029	0.435747	0.532518	0.570962	0.696058	0.778217	0.888097	1.0197	1.23047	1.32526	1.47656	1.65982	1.97932	2.32164	2.75141	3.22323	3.83535	4.61703	5.49544	6.85538	9.24736	12.5484	17.0081	22.141	31.2381	45.7245	84.3251
0.166481	0.254683	0.348029	0.435861	0.534517	0.572044	0.700215	0.778217	0.888424	1.02489	1.23047	1.32526	1.47656	1.6611	1.98407	2.33066	2.75141	3.22422	3.85698	4.62666	5.50823	6.85538	9.26372	12.6594	17.0303	22.143	31.269	45.898	85.4098
0.166508	0.25653	0.348029	0.437876	0.534678	0.581052	0.701207	0.778217	0.894346	1.0288	1.23047	1.32526	1.47656	1.66395	1.98407	2.33465	2.75141	3.22936	3.89108	4.62722	5.52977	6.898	9.27217	12.7043	17.0534	22.1511	31.3584	45.9148	85.8105
0.166655	0.257977	0.348029	0.438157	0.534928	0.581165	0.70313	0.778217	0.894346	1.03703	1.23047	1.32526	1.47656	1.66648	1.98407	2.33465	2.75141	3.23686	3.89736	4.65394	5.53027	6.94256	9.32611	12.7043	17.0534	22.2535	31.3923	45.9642	85.854
0.167089	0.258578	0.348029	0.440153	0.536229	0.5812	0.703782	0.778217	0.898584	1.03746	1.23047	1.32526	1.47656	1.66845	1.98407	2.33465	2.75744	3.23686	3.9091	4.6693	5.5465	6.96928	9.43889	12.747	17.057	22.3455	31.5081	46.071	86.1374
0.168238	0.259304	0.348029	0.440731	0.536476	0.582554	0.704151	0.778217	0.900757	1.0409	1.23047	1.32526	1.47656	1.6694	1.98407	2.34454	2.76337	3.23686	3.91863	4.67674	5.55213	6.99559	9.47061	12.7613	17.057	22.3783	31.5908	46.0728	86.227
0.168423	0.259428	0.348029	0.441923	0.537118	0.582831	0.704606	0.778217	0.903745	1.04409	1.23047	1.32526	1.48334	1.67759	1.98407	2.35318	2.77164	3.23686	3.9243	4.68374	5.55213	7.05082	9.58503	12.8718	17.1102	22.4486	31.5925	46.1975	86.4486
0.168537	0.26313	0.348029	0.442609	0.538585	0.583469	0.704861	0.778217	0.906081	1.04409	1.23047	1.32526	1.48777	1.68428	1.98407	2.3688	2.77325	3.24162	3.94963	4.68497	5.55387	7.08562	9.61321	12.8818	17.142	22.5387	31.5931	46.2663	86.4658
0.168793	0.264075	0.348029	0.442872	0.539031	0.58385	0.713226	0.778217	0.907298	1.04409	1.23047	1.33082	1.49663	1.68587	1.98438	2.37326	2.7757	3.26713	3.9663	4.68507	5.59419	7.11905	9.69497	12.8876	17.1808	22.5401	31.6371	46.4133	86.4802
0.169128	0.265563	0.348029	0.443383	0.53909	0.584739	0.714287	0.778217	0.907784	1.05062	1.23047	1.33738	1.49693	1.68636	1.98482	2.39758	2.78959	3.2833	3.96814	4.70161	5.61719	7.13672	9.70745	12.9941	17.1808	22.5759	31.7756	46.4883	87.1853
0.169293	0.26581	0.348029	0.443672	0.540166	0.585009	0.714762	0.778217	0.907826	1.05103	1.23047	1.34469	1.49693	1.69597	1.98724	2.39981	2.8059	3.28918	3.96814	4.70161	5.68152	7.15367	9.73549	13.043	17.2002	22.6219	31.9021	46.6358	87.7795
0.169898	0.266454	0.348029	0.445953	0.543423	0.586066	0.715837	0.778666	0.91855	1.05206	1.23047	1.34554	1.49693	1.69829	1.99982	2.41869	2.8059	3.30741	3.97577	4.71338	5.68896	7.16636	9.75103	13.0505	17.2266	22.6473	31.948	46.7759	87.8062
0.170016	0.266499	0.348029	0.447209	0.54385	0.587291	0.721169	0.779907	0.919815	1.05353	1.23047	1.3466	1.49693	1.70808	2.01301	2.42374	2.8059	3.31621	3.97852	4.71395	5.72399	7.23453	9.77612	13.0516	17.2353	22.662	31.9922	46.7906	88.2036
0.170178	0.266599	0.348029	0.451331	0.545369	0.588823	0.722935	0.782547	0.919876	1.05373	1.23047	1.35267	1.49693	1.71157	2.01831	2.42374	2.8059	3.33949	3.98392	4.71961	5.72399	7.26706	9.79374	13.0523	17.2647	22.7539	32.1483	46.7972	88.2461
0.170256	0.266911	0.34851	0.451664	0.546422	0.594656	0.723178	0.782905	0.922691	1.05781	1.23277	1.37224	1.49693	1.71387	2.02232	2.42374	2.8059	3.34724	3.99845	4.72679	5.73984	7.2774	9.7975	13.0549	17.286	22.7844	32.1518	46.9405	88.2873
0.170344	0.267057	0.349926	0.451786	0.546711	0.594733	0.72345	0.783429	0.922746	1.05804	1.23503	1.37644	1.49693	1.71733	2.02934	2.42374	2.80707	3.34724	4.00612	4.73483	5.74512	7.30861	9.80059	13.2093	17.2915	22.8148	32.2589	46.9736	89.439
0.170355	0.267061	0.35031	0.453194	0.549636	0.601858	0.72528	0.784393	0.924393	1.06603	1.23749	1.38203	1.49693	1.72169	2.02934	2.4362	2.82818	3.35989	4.0082	4.75286	5.76616	7.30861	9.80677	13.2783	17.2915	22.8761	32.4117	47.0152	89.8023
0.170436	0.267929	0.350791	0.454357	0.550282	0.607353	0.727934	0.784393	0.925446	1.08076	1.23924	1.38663	1.49716	1.72266	2.02934	2.43851	2.82828	3.37508	4.02685	4.76951	5.77024	7.34571	9.85987	13.2876	17.2962	22.888	32.432	47.0811	90.0632
0.171054	0.26825	0.351228	0.458879	0.550282	0.608873	0.73039	0.784393	0.926827	1.08673	1.24712	1.39212	1.49743	1.72266	2.02934	2.43947	2.83596	3.38616	4.03059	4.77117	5.77701	7.39206	9.86569	13.3143	17.3214	22.9812	32.4667	47.1608	90.253
0.171422	0.268602	0.351878	0.459076	0.550282	0.609001	0.734948	0.784393	0.932303	1.0912	1.24826	1.39225	1.51192	1.73908	2.02934	2.44518	2.86957	3.42769	4.03916	4.77806	5.77981	7.40035	9.87837	13.3255	17.3322	23.0375	32.4695	47.1851	90.3831
0.172467	0.269431	0.353538	0.459521	0.550282	0.609256	0.738281	0.79505	0.934665	1.0915	1.25484	1.40005	1.51217	1.74015	2.0404	2.45479	2.86992	3.42769	4.0568	4.78049	5.84958	7.40329	9.90814	13.3391	17.3921	23.0847	32.53	47.2872	90.4876
0.172932	0.269628	0.353682	0.466089	0.550282	0.611282	0.738281	0.795621	0.940152	1.09597	1.25484	1.40849	1.51545	1.74015	2.0436	2.45515	2.87014	3.43087	4.06033	4.79785	5.84958	7.46811	9.96753	13.3889	17.4015	23.0988	32.544	47.3249	90.5204
0.173051	0.269713	0.354168	0.466615	0.550282	0.611405	0.738281	0.799222	0.941971	1.09894	1.25484	1.41012	1.51779	1.74015	2.05726	2.45561	2.87486	3.4331	4.06591	4.82234	5.86915	7.4725	9.99728	13.4273	17.476	23.1446	32.6903	47.7504	90.6043
0.173105	0.270126	0.35448	0.467094	0.550282	0.612381	0.738281	0.800081	0.945499	1.09902	1.25484	1.41344	1.52203	1.74015	2.06112	2.46094	2.87715	3.44191	4.0665	4.83124	5.9165	7.48465	10.0417	13.553	17.487	23.1694	32.7249	47.7828	91.0297
0.173232	0.270274	0.355157	0.468798	0.550282	0.613227	0.738281	0.802739	0.949453	1.09911	1.25484	1.41962	1.52364	1.74015	2.06629	2.46094	2.88045	3.44829	4.07358	4.83498	5.94438	7.48754	10.0417	13.5887	17.5322	23.1838	32.7386	47.9127	91.0525
0.174121	0.271862	0.356861	0.469334	0.550282	0.615234	0.738281	0.804084	0.949636	1.0996	1.25484	1.43496	1.52673	1.74015	2.07273	2.46094	2.88045	3.45409	4.07373	4.83728	5.94712	7.52902	10.0534	13.6253	17.597	23.251	32.7675	47.9933	91.0936
0.174162	0.271946	0.357961	0.47205	0.550282	0.623007	0.738281	0.805688	0.950424	1.10007	1.25484	1.43496	1.52938	1.74015	2.07479	2.46598	2.89423	3.45966	4.08426	4.84699	5.9847	7.53304	10.0538	13.6689	17.6176	23.2633	32.7758	48.0513	91.1507
0.174415	0.272428	0.358236	0.472429	0.550282	0.623251	0.738281	0.811154	0.957058	1.10056	1.25484	1.43496	1.53696	1.74015	2.08563	2.47321	2.89671	3.48029	4.08882	4.84748	5.98941	7.58113	10.0928	13.6975	17.6186	23.2659	32.8118	48.069	91.6675
0.174691	0.273155	0.359218	0.473554	0.550282	0.624166	0.738281	0.813607	0.958004	1.10056	1.25484	1.43496	1.54111	1.74015	2.10263	2.47321	2.91285	3.48029	4.08904	4.85734	5.99288	7.58113	10.0988	13.7922	17.6317	23.2973	32.8755	48.3343	91.684
0.175318	0.274343	0.359219	0.474007	0.550282	0.625998	0.738281	0.818865	0.960231	1.10056	1.25484	1.43496	1.54535	1.74015	2.1161	2.47321	2.91626	3.48029	4.0909	4.87335	6.06766	7.58878	10.1168	13.7947	17.7396	23.3412	32.9297	48.6767	91.7575
0.175333	0.275196	0.359551	0.47656	0.550282	0.633522	0.738281	0.819632	0.965038	1.10056	1.25484	1.43603	1.54694	1.74292	2.11698	2.47321	2.92465	3.48029	4.09874	4.88788	6.07583	7.60186	10.1168	13.8196	17.7682	23.3634	32.9472	48.7042	92.4558
0.175359	0.275908	0.360047	0.479626	0.550282	0.63355	0.738281	0.819863	0.965727	1.10056	1.25484	1.43673	1.54834	1.74453	2.11698	2.47321	2.94575	3.48029	4.09903	4.89871	6.07807	7.63287	10.1178	14.0209	17.7852	23.3976	32.9665	48.8377	92.5381
0.175518	0.276439	0.362922	0.479997	0.550282	0.633914	0.738281	0.821516	0.966562	1.10056	1.25536	1.43892	1.55198	1.75396	2.11757	2.47671	2.94614	3.52353	4.11698	4.92188	6.07807	7.63527	10.1258	14.0446	17.8566	23.4908	33.0064	48.9504	92.5744
0.176189	0.276447	0.363375	0.480405	0.550282	0.634519	0.738281	0.821952	0.980191	1.10056	1.25574	1.44114	1.55643	1.76546	2.14744	2.47992	2.95312	3.52353	4.12069	4.92654	6.08094	7.69258	10.1325	14.1969	17.8669	23.5274	33.0215	48.9918	92.5813
0.176731	0.276578	0.363793	0.481502	0.550282	0.634989	0.738281	0.822977	0.984375	1.10056	1.25625	1.4413	1.55643	1.77461	2.15409	2.49401	2.95882	3.52353	4.12528	4.93374	6.09929	7.77049	10.1348	14.199	17.8768	23.5274	33.0773	49.077	92.7855
0.176905	0.277147	0.365896	0.481538	0.550282	0.637758	0.738281	0.823017	0.984375	1.10056	1.25683	1.44337	1.55643	1.77461	2.1571	2.49484	2.95887	3.52353	4.13549	4.95254	6.10318	7.81711	10.1348	14.2692	17.8838	23.5274	33.3028	49.1233	93.061
0.177286	0.27719	0.36661	0.482229	0.550282	0.639884	0.738281	0.829635	0.984375	1.10056	1.25894	1.44816	1.55643	1.77461	2.1641	2.49594	2.96217	3.52736	4.1389	4.95254	6.10911	7.83216	10.1467	14.3073	17.9918	23.5493	33.3091	49.3475	93.1512
0.178151	0.277729	0.367137	0.483449	0.550282	0.640791	0.738281	0.829806	0.984375	1.10056	1.25905	1.45517	1.55721	1.77461	2.17062	2.50967	2.9623	3.54921	4.17529	4.97407	6.15234	7.83726	10.1646	14.3741	18.0657	23.5497	33.3649	49.3777	93.5059
0.178439	0.278764	0.367814	0.483824	0.550282	0.642208	0.738281	0.831114	0.984375	1.1093	1.26034	1.45952	1.57259	1.77461	2.17722	2.50967	2.97356	3.54921	4.18359	4.97694	6.2126	7.89037	10.2358	14.4023	18.0875	23.5904	33.3759	49.4642	93.6441
0.17845	0.278771	0.368404	0.484021	0.550282	0.642525	0.738281	0.831879	0.984375	1.11498	1.27385	1.461	1.57577	1.77487	2.18097	2.50967	2.97356	3.55149	4.21245	5.00815	6.21971	7.95153	10.3301	14.6524	18.1059	23.5971	33.5038	49.4658	93.7996
0.179323	0.278973	0.368566	0.484097	0.550282	0.643997	0.738731	0.83619	0.984375	1.11904	1.28031	1.46517	1.57577	1.7749	2.18845	2.51002	2.97706	3.56089	4.21895	5.01443	6.24777	7.95153	10.3476	14.6545	18.1091	23.6349	33.5047	49.5376	94.0194
0.179432	0.27906	0.369462	0.484272	0.550282	0.646679	0.738877	0.839584	0.984375	1.12341	1.28115	1.46553	1.57577	1.78524	2.18967	2.512	2.98043	3.56855	4.22956	5.01822	6.25035	7.95153	10.3881	14.6833	18.151	23.6663	33.5203	49.5482	94.363
0.179477	0.279503	0.370525	0.484365	0.550282	0.647151	0.741783	0.839627	0.984375	1.12813	1.28171	1.4683	1.57577	1.78714	2.19252	2.51934	2.99386	3.58019	4.24824	5.01935	6.26452	7.95299	10.4554	14.7093	18.3468	23.6685	33.6467	49.5774	95.6734
0.180782	0.280216	0.370632	0.485032	0.550282	0.649569	0.745794	0.845978	0.985534	1.13052	1.28871	1.47388	1.57577	1.79159	2.19976	2.52003	2.99428	3.58318	4.24824	5.01935	6.28865	8.04617	10.4698	14.7301	18.3649	23.7503	33.678	49.675	95.7964
0.181139	0.280288	0.37146	0.485385	0.550282	0.650927	0.748293	0.848053	0.988399	1.13095	1.29861	1.47416	1.57577	1.79159	2.20113	2.53339	2.99447	3.60087	4.24824	5.02043	6.30788	8.11736	10.4721	14.7328	18.3666	23.8152	33.7041	49.7606	95.9251
0.181301	0.281593	0.37205	0.485421	0.550282	0.652646	0.749044	0.849432	0.988438	1.13854	1.30324	1.47656	1.57577	1.79159	2.20113	2.53369	3.00396	3.62324	4.24824	5.0298	6.32373	8.12723	10.5677	14.743	18.3982	23.8749	33.7292	49.7846	97.0612
0.181708	0.281603	0.373141	0.490706	0.550282	0.652898	0.749679	0.851088	0.992608	1.15763	1.31167	1.47656	1.57577	1.79588	2.20113	2.53369	3.00396	3.62471	4.24824	5.04825	6.3295	8.14715	10.5849	14.7432	18.4061	23.8914	33.7959	49.8134	97.0752
0.181716	0.28181	0.374769	0.490817	0.550282	0.654406	0.749948	0.853119	0.997197	1.1704	1.31312	1.47656	1.57577	1.80756	2.20113	2.55635	3.00396	3.63353	4.26342	5.06262	6.33804	8.18054	10.5935	14.8413	18.4439	23.9137	33.8192	49.9764	97.746
0.181726	0.282379	0.374915	0.490852	0.550282	0.669314	0.750215	0.853291	1.00072	1.17402	1.31398	1.47656	1.58446	1.80839	2.20113	2.56326	3.00396	3.63353	4.26878	5.07659	6.34663	8.18054	10.6249	14.881	18.4439	24.0014	33.8332	50.0515	98.1695
0.181787	0.282698	0.375881	0.491995	0.550282	0.673898	0.750582	0.854641	1.00349	1.17657	1.32063	1.47656	1.5869	1.82318	2.21484	2.56929	3.00792	3.63486	4.27708	5.09739	6.35094	8.22766	10.6314	14.9308	18.5002	24.0095	33.8336	50.0878	98.3033
0.181955	0.283427	0.376514	0.492188	0.550282	0.67407	0.751285	0.8576	1.00827	1.1801	1.32404	1.47901	1.58844	1.83539	2.2186	2.56929	3.02497	3.64143	4.28195	5.10051	6.37727	8.25424	10.6846	15.0198	18.515	24.0127	33.8382	50.2327	98.5005
0.182877	0.284181	0.37662	0.492188	0.550282	0.675175	0.751906	0.85936	1.013	1.18614	1.32501	1.4824	1.58965	1.83877	2.22847	2.56929	3.03369	3.64178	4.29745	5.11648	6.39775	8.25424	10.6846	15.0243	18.5617	24.1046	33.9377	50.2712	99.1135
0.183216	0.284672	0.377293	0.492188	0.550282	0.675281	0.753602	0.864709	1.01467	1.18805	1.32526	1.48419	1.58978	1.8539	2.22847	2.57131	3.04705	3.64254	4.29784	5.13859	6.40317	8.32728	10.6846	15.0661	18.6399	24.1372	34.0331	50.2774	100.674
0.183821	0.285998	0.378167	0.492188	0.550282	0.680101	0.756079	0.86526	1.01467	1.1899	1.32526	1.48869	1.59061	1.85782	2.22847	2.57951	3.05198	3.65658	4.29784	5.14683	6.45967	8.34046	10.6893	15.1102	18.6458	24.1725	34.0607	50.3324	100.739
0.184374	0.28691	0.378448	0.492188	0.550813	0.682923	0.760413	0.866804	1.01467	1.19906	1.32526	1.49109	1.59648	1.86513	2.22847	2.60045	3.05662	3.65844	4.29784	5.1473	6.47903	8.39497	10.6959	15.1623	18.7419	24.1919	34.0731	50.3462	100.946
0.185239	0.28768	0.378528	0.492188	0.551604	0.68305	0.763263	0.867442	1.01467	1.20814	1.32526	1.49417	1.60467	1.86704	2.22847	2.61601	3.07532	3.65845	4.29784	5.14773	6.55649	8.4105	10.7636	15.1642	18.7591	24.2936	34.1033	50.5316	102.075
0.18548	0.287887	0.378564	0.492188	0.551801	0.684098	0.76528	0.868539	1.01467	1.21611	1.32526	1.49693	1.61261	1.87419	2.25572	2.61601	3.07647	3.69488	4.3139	5.15244	6.62628	8.4177	10.8057	15.1882	18.8065	24.5663	34.1574	50.5613	102.262
0.185702	0.288153	0.380845	0.492188	0.553124	0.685977	0.765531	0.869141	1.01467	1.21816	1.32526	1.49693	1.62001	1.87419	2.26887	2.61601	3.10252	3.6996	4.33784	5.16684	6.62671	8.47506	10.8057	15.2121	18.93	24.5761	34.2474	50.6678	102.53
0.185768	0.289441	0.381832	0.492188	0.553218	0.687412	0.768813	0.870073	1.01467	1.21866	1.32526	1.49693	1.63013	1.87419	2.26887	2.61601	3.12006	3.70247	4.34741	5.16815	6.64909	8.48577	10.8151	15.2267	18.9875	24.6179	34.3519	50.6936	103.196
0.186307	0.289825	0.384244	0.492188	0.553958	0.690151	0.769219	0.870801	1.01467	1.22422	1.32526	1.49693	1.6337	1.87419	2.26887	2.61601	3.15154	3.72144	4.35384	5.17382	6.67887	8.50004	10.8197	15.3073	19.0354	24.6647	34.3701	50.8676	103.617
0.186659	0.290201	0.384763	0.492188	0.55465	0.696058	0.77149	0.870948	1.01559	1.22674	1.32526	1.49693	1.64574	1.87419	2.26887	2.62793	3.15154	3.72378	4.37759	5.17382	6.70097	8.50448	10.8291	15.3101	19.0373	24.6969	34.3967	50.9658	104.021
0.187429	0.290316	0.384772	0.492188	0.55465	0.696058	0.77183	0.874783	1.01667	1.22742	1.32526	1.49693	1.65085	1.87419	2.26887	2.62801	3.17978	3.72407	4.38157	5.17704	6.72156	8.56038	10.8309	15.3406	19.0512	24.7321	34.3998	51.0908	104.597
0.187532	0.290819	0.385818	0.492188	0.55465	0.696058	0.775265	0.881838	1.02026	1.23047	1.32526	1.49707	1.65085	1.89894	2.26887	2.63651	3.1832	3.74839	4.38974	5.19985	6.72156	8.57099	10.8783	15.3869	19.1416	24.7627	34.4558	51.1786	105.324
0.187608	0.291628	0.386362	0.492188	0.55465	0.696058	0.777198	0.883104	1.02272	1.23047	1.32526	1.49773	1.65673	1.90101	2.27372	2.65617	3.19604	3.74839	4.40438	5.21463	6.75774	8.58511	10.9228	15.455	19.3227	24.8603	34.4619	51.324	106.114
0.187774	0.292319	0.386611	0.492188	0.55465	0.696058	0.778217	0.885167	1.02272	1.23047	1.3319	1.50321	1.65684	1.9082	2.28524	2.66191	3.20867	3.75363	4.41393	5.22044	6.77093	8.59569	10.9228	15.4866	19.354	24.8844	34.4751	51.3623	106.117
0.187985	0.292805	0.386634	0.492188	0.555221	0.696058	0.778217	0.885445	1.0236	1.23047	1.33437	1.5047	1.66395	1.91143	2.29492	2.66493	3.20867	3.75363	4.41817	5.23628	6.77093	8.6168	11.0194	15.4883	19.3899	25.0224	34.5293	51.4616	107.053
0.188255	0.293123	0.386724	0.492188	0.555903	0.696058	0.778217	0.885841	1.02677	1.23047	1.33577	1.50921	1.67141	1.9206	2.30108	2.68174	3.20867	3.75363	4.42969	5.25431	6.77093	8.64486	11.0304	15.4961	19.4912	25.0605	34.5575	51.617	107.321
0.188866	0.293411	0.386805	0.492188	0.556715	0.697094	0.778217	0.887032	1.04409	1.23047	1.33891	1.52016	1.67231	1.92205	2.30718	2.69044	3.20883	3.75646	4.43652	5.26187	6.80662	8.68629	11.0523	15.4961	19.5021	25.2039	34.573	51.6359	107.492
0.189175	0.293478	0.388621	0.492188	0.557117	0.701583	0.778217	0.887304	1.04409	1.23047	1.33957	1.53481	1.69112	1.92205	2.33465	2.69739	3.21061	3.76451	4.43652	5.27002	6.85538	8.70073	11.0547	15.5059	19.5176	25.2059	34.7869	51.6586	107.705
0.189526	0.293567	0.38946	0.492188	0.560913	0.702866	0.778217	0.887304	1.04409	1.23047	1.34465	1.53619	1.69525	1.92205	2.33465	2.70883	3.22877	3.76451	4.43652	5.2825	6.89502	8.70073	11.0605	15.5345	19.5807	25.4085	34.8196	52.2034	107.774
0.189759	0.294047	0.389632	0.492188	0.56237	0.703697	0.778217	0.887304	1.04534	1.23047	1.3513	1.55562	1.70454	1.92205	2.33465	2.71102	3.23605	3.77475	4.44156	5.28386	6.93443	8.70073	11.1043	15.7038	19.6345	25.4442	34.841	52.2334	108.508
0.191644	0.294596	0.38969	0.492188	0.567407	0.70395	0.778217	0.887304	1.04864	1.23047	1.35513	1.55643	1.70685	1.92205	2.33606	2.71819	3.23686	3.78159	4.45695	5.31243	6.96928	8.71044	11.136	15.7519	19.6644	25.5315	34.8481	52.3078	108.702
0.191714	0.294792	0.389764	0.492188	0.568808	0.704091	0.778217	0.887304	1.05394	1.23047	1.37117	1.55643	1.70801	1.92648	2.34262	2.72387	3.24568	3.78197	4.46271	5.32382	6.99153	8.72853	11.1424	15.7591	19.7029	25.628	34.9462	52.3413	108.921
0.191921	0.295226	0.390161	0.492188	0.568941	0.70917	0.778217	0.887304	1.05552	1.23047	1.37676	1.55643	1.72013	1.92893	2.35318	2.73758	3.2469	3.79899	4.47842	5.34566	6.99963	8.79419	11.1424	15.7673	19.7707	25.6788	34.9505	52.3751	108.989
0.192104	0.296026	0.39163	0.492188	0.570429	0.712725	0.778217	0.887304	1.06084	1.23047	1.37759	1.55643	1.72266	1.93172	2.35994	2.75141	3.27279	3.80283	4.48466	5.37477	7.00395	8.8217	11.1666	15.8257	19.7888	25.7365	35.0462	52.4035	108.996
0.192221	0.296117	0.391981	0.492188	0.571041	0.714345	0.778217	0.887304	1.063	1.23487	1.38049	1.55643	1.72495	1.9433	2.36841	2.75141	3.27421	3.80491	4.49293	5.37477	7.02563	8.8217	11.208	15.8446	19.7888	25.7459	35.0543	52.422	109.258
0.192364	0.297235	0.392549	0.492188	0.57157	0.717378	0.778217	0.887304	1.06378	1.23494	1.38449	1.55643	1.73323	1.94955	2.37045	2.75141	3.2833	3.81493	4.51003	5.38436	7.04491	8.82467	11.2317	15.8497	19.8138	25.7621	35.0742	52.6002	110.542
0.192376	0.297656	0.393671	0.492188	0.574032	0.719316	0.778217	0.887304	1.06646	1.23807	1.38781	1.56459	1.74015	1.95158	2.37326	2.77325	3.2833	3.8204	4.51273	5.3866	7.07483	8.84328	11.363	15.9031	19.8438	25.7683	35.1325	52.6826	110.786
0.192553	0.298209	0.395153	0.492188	0.575459	0.726428	0.778217	0.887304	1.0673	1.24879	1.39079	1.57435	1.74015	1.95882	2.37537	2.78226	3.28773	3.8204	4.51418	5.39726	7.13395	8.86852	11.379	15.9809	19.9321	25.8983	35.1534	52.7127	111.366
0.192622	0.298385	0.396287	0.492188	0.576426	0.731433	0.778217	0.887304	1.06868	1.25484	1.39212	1.57577	1.74024	1.96059	2.37583	2.79437	3.29316	3.84097	4.53774	5.41406	7.13672	8.91729	11.4326	16.0037	19.9715	25.9088	35.1783	52.7133	111.691
0.193378	0.298473	0.396594	0.492188	0.57735	0.731997	0.778217	0.887304	1.07149	1.25484	1.39212	1.57577	1.75018	1.96875	2.37594	2.79993	3.30169	3.86432	4.53852	5.41965	7.13672	8.92737	11.4607	16.0131	20.0003	25.9568	35.3288	52.7758	113.308
0.193786	0.298692	0.396811	0.493106	0.579865	0.732126	0.778217	0.887304	1.07445	1.25484	1.3923	1.57577	1.75396	1.97327	2.40611	2.8059	3.3043	3.87221	4.58078	5.42105	7.14096	8.9478	11.4612	16.0269	20.0979	26.008	35.3544	52.842	113.598
0.193862	0.298845	0.398973	0.495711	0.582483	0.73348	0.778217	0.887304	1.07869	1.25484	1.39434	1.57577	1.7672	1.97767	2.41515	2.8059	3.31085	3.89108	4.59741	5.42416	7.14508	8.95664	11.4797	16.049	20.1064	26.0721	35.3809	52.9626	115.45
0.194133	0.298909	0.400825	0.495931	0.583233	0.73522	0.778217	0.887304	1.08193	1.25484	1.39649	1.57577	1.77298	1.98407	2.41985	2.8059	3.31785	3.91748	4.59741	5.47453	7.15854	9.0253	11.4797	16.145	20.1512	26.0836	35.4589	52.9702	116.037
0.195704	0.29943	0.401116	0.496012	0.585329	0.738281	0.778217	0.887304	1.08197	1.25484	1.39996	1.57577	1.77461	1.98407	2.42185	2.8059	3.34724	3.92197	4.61796	5.48524	7.16636	9.03536	11.5271	16.1581	20.1572	26.1045	35.5416	53.0062	116.914
0.195924	0.300779	0.401737	0.496242	0.586073	0.738281	0.778217	0.887304	1.08629	1.25484	1.40134	1.57577	1.77461	1.98407	2.42374	2.8059	3.34724	3.9342	4.62368	5.50282	7.16636	9.03536	11.5323	16.1625	20.2172	26.2921	35.6462	53.0131	118.292
0.196192	0.301034	0.402558	0.497002	0.587319	0.738281	0.778217	0.887304	1.08887	1.25484	1.40323	1.57577	1.77461	1.98407	2.42374	2.82811	3.34724	3.93448	4.62633	5.50292	7.16636	9.04876	11.569	16.3833	20.2367	26.4435	35.6729	53.0959	119.022
0.196875	0.302179	0.402658	0.498387	0.587982	0.738281	0.778217	0.887304	1.09571	1.25484	1.40669	1.58439	1.77461	1.98407	2.42374	2.82855	3.34724	3.94043	4.63847	5.50396	7.1748	9.07549	11.5814	16.4559	20.3679	26.4525	35.7367	53.1654	122.387
0.197543	0.302423	0.403681	0.498906	0.591217	0.738281	0.778217	0.889487	1.09986	1.25484	1.41509	1.58553	1.77461	1.98407	2.42374	2.83083	3.34868	3.94518	4.64231	5.53027	7.20429	9.10879	11.5899	16.4662	20.3779	26.4525	35.8393	53.2894	122.612
0.197562	0.30467	0.40494	0.498954	0.591733	0.738281	0.778217	0.890594	1.10056	1.25484	1.42887	1.589	1.78349	1.98635	2.42374	2.83137	3.35229	3.95876	4.64329	5.5465	7.2335	9.11923	11.6082	16.4901	20.3961	26.4708	36.0464	53.3324	123.787
0.19772	0.305436	0.405466	0.499171	0.595223	0.738281	0.778217	0.891036	1.10056	1.25788	1.43239	1.59573	1.79159	1.99218	2.4317	2.83305	3.3738	3.97372	4.65322	5.59011	7.23783	9.13535	11.6296	16.5176	20.4073	26.5051	36.0718	53.4885	124.062
0.197833	0.305481	0.405959	0.499366	0.595647	0.738281	0.778217	0.891501	1.10056	1.2605	1.43496	1.6072	1.79159	1.99416	2.44695	2.84136	3.38984	3.97577	4.65666	5.6118	7.24202	9.27239	11.6317	16.5341	20.4315	26.5257	36.12	53.5488	124.254
0.198149	0.30619	0.406223	0.500937	0.595745	0.738281	0.784393	0.891568	1.10056	1.2648	1.43496	1.61325	1.79159	2.02612	2.46094	2.84402	3.41755	3.97577	4.65964	5.6655	7.26706	9.30162	11.6395	16.5762	20.4317	26.6202	36.2316	53.7175	125.027
0.198159	0.30654	0.407215	0.501494	0.597522	0.738281	0.787532	0.893856	1.10056	1.26529	1.43496	1.61372	1.79159	2.02934	2.46094	2.85726	3.41884	3.98008	4.66847	5.67435	7.28787	9.31632	11.6734	16.6546	20.4628	26.6202	36.2828	53.7285	125.154
0.198354	0.307612	0.407421	0.501642	0.598748	0.738281	0.788117	0.894346	1.10056	1.26861	1.43496	1.63544	1.79159	2.02934	2.46094	2.86748	3.42291	3.99496	4.67578	5.67825	7.31689	9.33975	11.7685	16.6854	20.4892	26.633	36.3128	53.7364	128.953
0.198545	0.307665	0.409509	0.50182	0.599481	0.738281	0.79204	0.897217	1.10056	1.27116	1.43496	1.64203	1.79159	2.02934	2.46094	2.86763	3.42805	3.99579	4.68481	5.68152	7.31689	9.34314	11.7789	16.6903	20.5131	26.6605	36.3544	53.7953	129.427
0.198598	0.308297	0.410433	0.502488	0.599934	0.738281	0.796366	0.898375	1.10056	1.27647	1.43531	1.65085	1.80554	2.02934	2.46845	2.86992	3.43405	3.99823	4.69214	5.68152	7.31689	9.37097	11.8881	16.7233	20.5199	26.7117	36.4136	53.875	130.633
0.199187	0.308883	0.4109	0.503671	0.601038	0.738281	0.797005	0.901595	1.10056	1.27899	1.4374	1.65085	1.80564	2.02934	2.47321	2.86992	3.43521	3.99964	4.70161	5.6909	7.38942	9.37097	11.8942	16.738	20.5337	26.7462	36.4235	53.8968	130.912
0.199592	0.309588	0.412223	0.506476	0.602704	0.738281	0.799515	0.903871	1.10208	1.27981	1.44127	1.65085	1.81181	2.02949	2.47321	2.86992	3.44669	4.01743	4.70161	5.69522	7.40041	9.37097	12.1062	16.7595	20.5523	26.7779	36.4759	53.9478	132.214
0.199769	0.309846	0.412377	0.51004	0.603963	0.738281	0.804185	0.90553	1.1036	1.28701	1.44729	1.65085	1.82367	2.03149	2.47321	2.87133	3.44674	4.02374	4.71699	5.69738	7.40329	9.40571	12.2183	16.7609	20.5809	26.7881	36.4967	53.9653	132.482
0.200102	0.310145	0.412807	0.512791	0.606151	0.738281	0.827119	0.917931	1.10446	1.28842	1.45079	1.65085	1.83219	2.0657	2.47321	2.8829	3.45409	4.03076	4.72145	5.7081	7.40329	9.41932	12.2603	16.7633	20.5912	26.8005	36.5389	54.0029	133.368
0.200345	0.310983	0.413734	0.51345	0.606184	0.738281	0.82782	0.923916	1.11529	1.28954	1.45904	1.65085	1.83959	2.07045	2.48055	2.89648	3.46656	4.0444	4.72769	5.7351	7.40329	9.41932	12.2762	16.7958	20.6161	26.8016	36.5831	54.0163	133.587
0.200862	0.311122	0.414742	0.51375	0.610123	0.738281	0.828255	0.937179	1.11548	1.29294	1.45928	1.65085	1.84998	2.07942	2.48182	2.91465	3.47416	4.05775	4.72924	5.80802	7.4323	9.42253	12.3837	16.8238	20.6342	27.03	36.6118	54.1645	135.023
0.201239	0.311486	0.415706	0.515648	0.61603	0.738281	0.829193	0.938696	1.12158	1.29352	1.46117	1.65085	1.8651	2.09103	2.48687	2.91531	3.48322	4.0654	4.73064	5.8296	7.44815	9.43217	12.4149	16.8299	20.6558	27.0412	36.6506	54.1869	135.152
0.201449	0.312186	0.418514	0.517764	0.616867	0.738281	0.831638	0.939419	1.12534	1.29672	1.46337	1.65323	1.86796	2.10263	2.48929	2.93143	3.48556	4.0667	4.73371	5.83123	7.45962	9.44043	12.5115	16.8506	20.6851	27.0412	36.6779	54.2476	135.301
0.202123	0.312687	0.419504	0.517835	0.618739	0.738281	0.832229	0.939424	1.12572	1.30653	1.47136	1.66006	1.87419	2.10263	2.49005	2.94451	3.48679	4.07358	4.76174	5.87025	7.48465	9.44534	12.5484	16.8594	20.6909	27.124	36.6977	54.3026	138.302
0.202169	0.313363	0.420008	0.518455	0.619401	0.738281	0.83483	0.942541	1.12804	1.31548	1.47656	1.66596	1.87419	2.10263	2.49453	2.96199	3.49342	4.07782	4.77828	5.91038	7.5104	9.46937	12.5532	16.8607	20.7245	27.1611	36.7081	54.4668	138.942
0.202283	0.313725	0.421329	0.518642	0.620607	0.738281	0.841325	0.942812	1.13889	1.32348	1.47656	1.66664	1.87419	2.10263	2.50967	2.96336	3.49747	4.07855	4.79427	5.91137	7.52902	9.47061	12.5893	16.8821	20.8426	27.2887	36.7204	54.4891	140.042
0.20249	0.31456	0.422058	0.519559	0.621462	0.738281	0.841979	0.951963	1.13967	1.32509	1.47656	1.67312	1.88272	2.10392	2.50967	2.97356	3.49765	4.09215	4.79848	5.9165	7.58878	9.50572	12.639	16.8875	20.8484	27.302	36.8043	54.7899	142.882
0.202663	0.314832	0.422592	0.519771	0.625108	0.738281	0.843338	0.954654	1.15158	1.32526	1.47656	1.67688	1.88907	2.11698	2.51762	2.98907	3.49874	4.09581	4.80529	5.9165	7.63287	9.58503	12.6493	16.9018	20.8846	27.3552	36.8591	54.835	144.377
0.202834	0.315538	0.423565	0.527268	0.628248	0.738281	0.845693	0.956678	1.15561	1.32526	1.47656	1.67804	1.89843	2.13706	2.52966	2.99386	3.51148	4.09644	4.82431	5.95312	7.63287	9.59165	12.668	16.9519	20.918	27.4061	36.8767	54.8657	144.616
0.203141	0.315603	0.423948	0.529545	0.629036	0.738441	0.848433	0.968765	1.15624	1.32526	1.47656	1.69783	1.90166	2.14117	2.53369	2.99572	3.52353	4.09688	4.83498	5.99277	7.639	9.61694	12.6685	17.0293	20.9766	27.4149	36.8788	54.867	144.75
0.20353	0.315982	0.424112	0.530025	0.629059	0.740196	0.848938	0.973053	1.15914	1.32526	1.49532	1.70502	1.90322	2.14521	2.54267	3.00396	3.52353	4.09699	4.83498	6.06408	7.68821	9.6326	12.7427	17.0303	21.0104	27.5031	36.8937	54.8828	147.709
0.20374	0.316046	0.426398	0.530654	0.633117	0.742759	0.85817	0.97344	1.15997	1.32526	1.49552	1.70662	1.90916	2.14988	2.54841	3.00396	3.52353	4.09799	4.84995	6.0705	7.69215	9.65114	12.7755	17.0534	21.1534	27.5647	36.9837	54.8843	148.691
0.20386	0.316253	0.426543	0.530665	0.633344	0.743445	0.860161	0.975125	1.16076	1.32526	1.49693	1.71331	1.91308	2.15692	2.55781	3.00396	3.52353	4.10423	4.85373	6.07807	7.72358	9.65927	12.8714	17.057	21.1951	27.6275	37.0761	54.9444	148.8
0.204174	0.317001	0.428024	0.530711	0.634556	0.744141	0.860344	0.978976	1.16216	1.32526	1.49693	1.71378	1.91769	2.15791	2.567	3.0119	3.5389	4.10591	4.86619	6.08094	7.72538	9.67621	12.8871	17.0942	21.2412	27.6349	37.0762	54.948	149.262
0.204318	0.317004	0.428163	0.531234	0.640184	0.750092	0.8779	0.982427	1.16647	1.32526	1.49693	1.71459	1.92095	2.18314	2.56784	3.02183	3.54399	4.11745	4.8701	6.08919	7.7275	9.67621	12.9334	17.142	21.277	27.6689	37.1317	54.9633	149.479
0.204525	0.317699	0.428593	0.532324	0.642098	0.753127	0.886133	0.983068	1.16819	1.32526	1.49693	1.72266	1.92153	2.21486	2.56841	3.04401	3.54704	4.13444	4.87661	6.12961	7.7275	9.71806	12.9941	17.1484	21.2796	27.6816	37.1895	55.1701	150.778
0.204606	0.317738	0.432678	0.533842	0.645226	0.75453	0.887304	0.983487	1.17681	1.32526	1.49693	1.72266	1.92205	2.21847	2.56929	3.04977	3.55045	4.13533	4.87851	6.14342	7.81786	9.73139	13.0069	17.1579	21.2853	27.7595	37.231	55.5063	153.768
0.204751	0.319676	0.434736	0.533866	0.645326	0.755829	0.887304	0.984375	1.17752	1.32526	1.49693	1.72266	1.92205	2.22699	2.56929	3.05401	3.58318	4.13962	4.8797	6.15234	7.82098	9.88366	13.0204	17.1949	21.4045	27.7746	37.237	55.5851	154.7
0.204826	0.320196	0.435664	0.534362	0.648582	0.763325	0.887304	0.984375	1.17979	1.32526	1.49943	1.72266	1.92205	2.22847	2.56929	3.05433	3.6005	4.15928	4.88164	6.15279	7.82098	9.88366	13.0453	17.2379	21.4793	27.8097	37.3283	55.6108	155.035
0.205028	0.320235	0.435726	0.536026	0.650842	0.763772	0.887304	0.984375	1.18026	1.32526	1.51338	1.72684	1.92205	2.22847	2.56929	3.05806	3.60581	4.17323	4.90338	6.19648	7.83216	9.90814	13.0779	17.2705	21.5469	27.8603	37.3455	55.6852	156.429
0.205081	0.322637	0.435989	0.537268	0.651921	0.763822	0.887304	0.984375	1.18207	1.32526	1.51516	1.73125	1.92937	2.22847	2.59022	3.05945	3.63353	4.18359	4.90416	6.21563	7.8622	9.92036	13.0977	17.2716	21.5778	27.8782	37.4759	55.9299	157.331
0.205213	0.323304	0.436214	0.537976	0.6521	0.768794	0.887304	0.984375	1.1863	1.32526	1.52175	1.74015	1.94199	2.22847	2.59033	3.07654	3.63353	4.18359	4.90446	6.22109	7.86346	9.92036	13.1888	17.278	21.6073	28.0007	37.5073	55.9504	157.356
0.205479	0.323715	0.438143	0.539126	0.652209	0.769026	0.887304	0.984375	1.18645	1.32526	1.5267	1.74015	1.94578	2.22847	2.59539	3.07703	3.63784	4.18778	4.92188	6.22573	7.87571	9.97211	13.2457	17.3053	21.6115	28.007	37.5307	55.9867	157.946
0.205641	0.324229	0.439668	0.5406	0.652522	0.775873	0.887304	0.984375	1.19145	1.32676	1.53418	1.74015	1.94617	2.22847	2.61463	3.08675	3.64556	4.20192	4.92802	6.26452	7.90953	9.99335	13.3822	17.3387	21.6367	28.1129	37.6105	56.0532	158.594
0.205791	0.32466	0.439884	0.543902	0.654642	0.776468	0.887304	0.984375	1.20282	1.32748	1.53713	1.74015	1.95419	2.23482	2.61601	3.09311	3.64644	4.20245	4.92845	6.27418	7.92483	9.99335	13.3935	17.3478	21.6856	28.1129	37.6202	56.1599	158.94
0.205841	0.326977	0.440338	0.544116	0.654774	0.778217	0.887304	0.984375	1.21285	1.32805	1.53994	1.74015	1.96875	2.24094	2.62892	3.09849	3.65845	4.21245	4.93089	6.30242	7.95153	10.0116	13.5344	17.3497	21.6879	28.1248	37.6467	56.2866	159.203
0.205956	0.32744	0.441005	0.54698	0.655537	0.778217	0.887304	0.988628	1.21591	1.33061	1.54149	1.74015	1.96875	2.26887	2.63528	3.10256	3.65845	4.22959	4.95096	6.30308	8.01223	10.0176	13.5374	17.3753	21.7135	28.1662	37.6531	56.3904	160.616
0.206762	0.327515	0.441393	0.547982	0.657692	0.778217	0.887304	0.991163	1.21809	1.34723	1.54364	1.74015	1.96875	2.26887	2.65051	3.10368	3.69141	4.23396	4.95204	6.32705	8.03488	10.0206	13.5553	17.3753	21.7247	28.2097	37.6912	56.4862	162.52
0.206969	0.327788	0.444143	0.548764	0.657787	0.778217	0.887304	0.992655	1.21854	1.35275	1.55643	1.74015	1.96875	2.26887	2.65379	3.11287	3.69141	4.23396	4.98302	6.32705	8.04617	10.0417	13.6132	17.4015	21.7949	28.2174	37.7319	56.5016	164.165
0.207149	0.328187	0.44422	0.549741	0.658555	0.778217	0.887304	0.996897	1.22626	1.35283	1.55643	1.75241	1.97093	2.26887	2.65771	3.12249	3.6996	4.23863	5.00401	6.35852	8.06111	10.0651	13.6443	17.4015	21.8531	28.2365	37.7808	56.8982	165.147
0.207401	0.328708	0.44427	0.550282	0.659959	0.778217	0.887304	1.00084	1.22975	1.36172	1.55643	1.75245	1.97174	2.26887	2.65937	3.12618	3.6996	4.24053	5.01644	6.38422	8.06916	10.1348	13.6488	17.4049	21.9189	28.2933	37.8709	57.2066	165.471
0.207426	0.329835	0.446761	0.550282	0.660257	0.778217	0.887304	1.00104	1.23047	1.36339	1.55643	1.75396	1.97535	2.26887	2.66191	3.12798	3.70244	4.24824	5.02942	6.39125	8.12109	10.1348	13.7109	17.431	21.9682	28.3788	37.875	57.2532	166.236
0.207428	0.332377	0.44812	0.550282	0.664468	0.778217	0.887824	1.00156	1.23047	1.36446	1.56613	1.75396	1.98407	2.26887	2.67758	3.13492	3.72407	4.24824	5.04816	6.41734	8.12482	10.1888	13.7213	17.438	22.0402	28.481	38.0754	57.3064	166.87
0.207602	0.332485	0.448687	0.550282	0.669377	0.778217	0.888376	1.00158	1.23047	1.37721	1.57577	1.75646	1.98407	2.27127	2.68862	3.13878	3.73368	4.27019	5.04942	6.43479	8.14851	10.2358	13.7681	17.4464	22.1101	28.5638	38.1477	57.3905	166.917
0.208624	0.33258	0.448724	0.550282	0.671036	0.778217	0.893199	1.0065	1.23047	1.37878	1.57577	1.75743	1.98407	2.27526	2.68888	3.13969	3.73787	4.28592	5.05802	6.47317	8.15087	10.239	13.886	17.464	22.2317	28.5739	38.2341	57.5053	197.6
0.209219	0.333756	0.450067	0.550282	0.671773	0.778217	0.893361	1.01467	1.23047	1.37958	1.57577	1.76589	1.98407	2.28002	2.69412	3.1402	3.7411	4.29673	5.06165	6.50567	8.18054	10.2565	13.9386	17.5021	22.2356	28.6769	38.3306	58.1391	197.669
0.209608	0.334097	0.450431	0.550282	0.674225	0.778217	0.894346	1.01467	1.23047	1.38825	1.57577	1.767	1.98407	2.28451	2.69673	3.14536	3.74384	4.31843	5.07335	6.54937	8.19533	10.2772	13.985	17.5056	22.3444	28.7029	38.5046	58.8068
0.210615	0.334761	0.450446	0.550282	0.676891	0.778217	0.894346	1.01467	1.23047	1.39538	1.57577	1.7731	1.98499	2.28688	2.70703	3.15154	3.74839	4.32057	5.07341	6.55106	8.20348	10.2801	14.0369	17.5132	22.3586	28.7606	38.5301	58.9481
0.210813	0.334951	0.452659	0.550282	0.679838	0.778217	0.896983	1.01467	1.23047	1.40368	1.57577	1.77461	1.99137	2.28809	2.70703	3.15154	3.74839	4.32275	5.08247	6.5666	8.21736	10.3037	14.0673	17.5211	22.3634	28.7779	38.5367	59.0446
0.211052	0.335961	0.454486	0.550282	0.680648	0.778217	0.903796	1.01467	1.23047	1.40492	1.57577	1.77461	1.99157	2.31017	2.71819	3.16737	3.74882	4.34155	5.10724	6.6841	8.25057	10.3301	14.122	17.5384	22.3692	28.7795	38.5708	59.0758
0.211221	0.336642	0.457194	0.550282	0.683973	0.778217	0.907919	1.01467	1.23047	1.40628	1.57811	1.77461	1.99166	2.32164	2.71819	3.17946	3.75363	4.38157	5.11429	6.68542	8.25424	10.3506	14.2011	17.6176	22.3878	28.9801	38.5991	59.1122
0.211554	0.336697	0.457545	0.550282	0.68605	0.778217	0.918074	1.01467	1.23047	1.40685	1.5815	1.77461	1.99542	2.32164	2.71819	3.18251	3.75363	4.39759	5.11597	6.69365	8.27256	10.3506	14.2819	17.6228	22.3988	29.0703	38.6375	59.1306
0.212218	0.337675	0.457906	0.550282	0.686727	0.778217	0.924233	1.01467	1.23047	1.41325	1.58656	1.77461	1.99704	2.33059	2.71819	3.18956	3.75646	4.40381	5.12466	6.75244	8.27256	10.3506	14.2862	17.6434	22.4288	29.1259	38.6375	59.1496
0.212248	0.33782	0.458091	0.550282	0.686776	0.778217	0.924328	1.01467	1.23047	1.41555	1.58913	1.77461	2.00033	2.34492	2.72614	3.19922	3.76007	4.40754	5.15292	6.7575	8.27256	10.3506	14.2862	17.6811	22.5063	29.1339	38.7048	59.5084
0.212386	0.33833	0.458173	0.550282	0.686986	0.778217	0.924724	1.01467	1.23047	1.4222	1.59347	1.77461	2.02934	2.34631	2.72852	3.20867	3.76451	4.41069	5.17284	6.7575	8.35024	10.3827	14.3369	17.6811	22.5191	29.1732	38.7189	59.5699
0.212496	0.339006	0.458193	0.550282	0.696058	0.778217	0.933601	1.01467	1.23047	1.42417	1.61945	1.78218	2.02934	2.374	2.73732	3.21456	3.76457	4.41635	5.18703	6.77093	8.36719	10.4041	14.4156	17.7205	22.5286	29.1868	38.7705	59.6055
0.212746	0.340429	0.458331	0.550282	0.696058	0.778217	0.935682	1.01467	1.23047	1.42449	1.62956	1.78496	2.02934	2.37727	2.74247	3.21734	3.78016	4.43583	5.19135	6.80662	8.36768	10.4089	14.5589	17.7222	22.5293	29.2065	38.8775	59.7299
0.212931	0.341044	0.460067	0.550282	0.696058	0.778217	0.937294	1.01467	1.23047	1.43445	1.62957	1.79159	2.02934	2.37905	2.74295	3.22063	3.7857	4.43652	5.2398	6.83123	8.37081	10.448	14.5688	17.7495	22.5558	29.3211	39.0237	60.2301
0.213115	0.341225	0.460126	0.550282	0.696058	0.778217	0.938051	1.01467	1.23047	1.43496	1.63043	1.79159	2.03293	2.39339	2.75141	3.23414	3.78841	4.43652	5.27874	6.84211	8.37081	10.4729	14.6144	17.8023	22.5812	29.3513	39.1722	60.5791
0.213135	0.341336	0.462429	0.550282	0.696058	0.778902	0.939762	1.01467	1.23047	1.43496	1.64194	1.79159	2.03349	2.39402	2.75771	3.25395	3.78967	4.43652	5.28386	6.85065	8.40162	10.5014	14.6441	17.8103	22.5878	29.3906	39.2224	60.6168
0.213378	0.341469	0.462732	0.550282	0.696058	0.778979	0.951599	1.01467	1.23047	1.43496	1.64239	1.79159	2.05318	2.3974	2.76479	3.28073	3.80306	4.45695	5.28939	6.8513	8.4105	10.5123	14.6712	17.8434	22.5991	29.4271	39.3481	60.8887
0.214159	0.341828	0.466019	0.550282	0.696058	0.782895	0.955916	1.01467	1.23047	1.4352	1.64779	1.79159	2.06199	2.41509	2.76607	3.2833	3.8204	4.4675	5.3546	6.86064	8.4105	10.5131	14.7266	17.8566	22.6406	29.4953	39.3521	61.0511
0.214514	0.34207	0.466997	0.550282	0.696058	0.783145	0.957486	1.01467	1.23047	1.44696	1.65085	1.7919	2.06678	2.41532	2.77334	3.2833	3.82114	4.48791	5.37477	6.9032	8.46313	10.5471	14.7353	17.867	22.6593	29.6982	39.4057	61.2617
0.214632	0.342295	0.467612	0.550282	0.696058	0.784393	0.957987	1.01467	1.23047	1.4475	1.65085	1.79607	2.07063	2.41902	2.77961	3.2833	3.83617	4.49079	5.37477	6.93006	8.47506	10.5706	14.7394	17.868	22.6821	29.7099	39.4372	61.3083
0.214915	0.342915	0.468226	0.550282	0.696058	0.786151	0.964747	1.01467	1.23047	1.45741	1.65085	1.81285	2.08817	2.42135	2.78457	3.29367	3.87764	4.49079	5.39726	6.94752	8.50004	10.5935	14.7756	17.8719	22.6901	29.7294	39.5017	61.4096
0.215043	0.343421	0.46913	0.550282	0.696058	0.79573	0.967725	1.01467	1.23047	1.46836	1.65085	1.81399	2.08843	2.43535	2.79912	3.30313	3.88057	4.49079	5.39726	6.95889	8.52849	10.5992	14.8004	17.9178	22.758	29.7478	39.5031	61.4175
0.215558	0.344925	0.470385	0.550282	0.698671	0.796028	0.968766	1.01741	1.23047	1.47656	1.65085	1.81887	2.09162	2.4362	2.8059	3.30457	3.88583	4.49079	5.39726	6.96058	8.53204	10.6408	14.8168	18.0331	22.782	29.8024	39.5911	61.5574
0.216696	0.344962	0.470492	0.550282	0.701217	0.79635	0.969221	1.02083	1.2345	1.47656	1.65892	1.82518	2.09285	2.43932	2.8059	3.30473	3.89108	4.49079	5.40567	6.96493	8.58511	10.6505	14.8576	18.0657	22.8125	29.8596	39.8596	61.7303
0.218125	0.345829	0.470613	0.550282	0.701583	0.802047	0.9716	1.02159	1.24023	1.47656	1.66304	1.84023	2.10125	2.44157	2.80937	3.31365	3.89108	4.49232	5.42549	7.00395	8.58511	10.676	14.8678	18.1059	22.8178	29.9426	39.8679	61.7746
0.218132	0.346065	0.47214	0.550282	0.701583	0.802343	0.976735	1.02306	1.2488	1.47656	1.66395	1.84364	2.10263	2.44408	2.82678	3.31707	3.89108	4.50265	5.43639	7.00986	8.58511	10.7172	14.942	18.1326	22.8284	29.976	40.0223	61.7774
0.218237	0.346218	0.472301	0.550282	0.701888	0.808108	0.980499	1.026	1.25484	1.47656	1.67344	1.85633	2.10263	2.45205	2.82779	3.33892	3.89847	4.50499	5.43639	7.05518	8.59185	10.7298	14.9693	18.146	22.8324	30.0345	40.071	61.8684
0.218363	0.346865	0.474401	0.550282	0.702851	0.808305	0.981392	1.0278	1.25484	1.47675	1.68377	1.87419	2.10263	2.45935	2.82817	3.34724	3.91914	4.51098	5.43722	7.07637	8.60976	10.7439	14.9814	18.151	22.8469	30.0391	40.1706	61.9531
0.21861	0.348029	0.475662	0.550282	0.706171	0.810052	0.981748	1.0324	1.25484	1.48188	1.68786	1.87419	2.10263	2.46094	2.83066	3.34724	3.92197	4.52667	5.46417	7.08562	8.64136	10.7495	15.0198	18.155	22.8679	30.1469	40.3061	61.9711
0.218864	0.348029	0.476006	0.550282	0.709831	0.810583	0.983407	1.0408	1.25484	1.48337	1.69127	1.87419	2.10263	2.46094	2.83128	3.34724	3.93122	4.53774	5.49571	7.10269	8.64757	10.7945	15.0212	18.3138	22.9289	30.1976	40.5667	62.0832
0.220571	0.348029	0.476178	0.550282	0.714243	0.810657	0.984375	1.04409	1.25484	1.48584	1.71174	1.87419	2.10263	2.46094	2.8398	3.34907	3.94518	4.53774	5.49656	7.12355	8.65699	10.8069	15.044	18.3666	22.9396	30.2014	40.5869	62.185
0.220584	0.348029	0.476214	0.550282	0.716431	0.810733	0.984375	1.04409	1.25484	1.49182	1.71518	1.88984	2.11698	2.46094	2.8444	3.35615	3.94813	4.53774	5.50012	7.13672	8.66935	10.8309	15.1792	18.3834	22.9805	30.2014	40.7102	62.1861
0.220914	0.348029	0.476944	0.550282	0.717769	0.811001	0.984375	1.04409	1.25484	1.49693	1.72266	1.89594	2.11698	2.46094	2.84524	3.3635	3.94939	4.55983	5.50282	7.16636	8.69725	10.8533	15.1892	18.4348	22.9871	30.2525	40.7651	62.215
0.22191	0.348029	0.477987	0.550282	0.717902	0.811626	0.984375	1.04409	1.25484	1.49693	1.72266	1.90145	2.11698	2.46094	2.84807	3.36942	3.95066	4.57804	5.50658	7.1748	8.70073	10.8862	15.2021	18.516	23.0134	30.2788	40.8521	62.2544
0.22389	0.348029	0.479228	0.550282	0.718427	0.813573	0.984375	1.04409	1.25484	1.49693	1.7264	1.90684	2.11698	2.46094	2.85071	3.3738	3.95545	4.58105	5.52028	7.1748	8.72853	10.8887	15.2195	18.5894	23.0186	30.3245	40.9908	62.2593
0.224693	0.348029	0.481555	0.550282	0.719663	0.814721	0.984375	1.04409	1.25484	1.49693	1.73084	1.90948	2.13292	2.46094	2.85533	3.37418	3.96814	4.59221	5.54624	7.1748	8.77188	10.895	15.2895	18.5903	23.0381	30.3764	41.0409	62.2768
0.22561	0.348029	0.482418	0.550282	0.721022	0.81575	0.984375	1.04409	1.25484	1.50405	1.74015	1.92037	2.13579	2.46772	2.86484	3.38107	3.98241	4.59879	5.56847	7.1748	8.77223	10.9228	15.3014	18.5944	23.0398	30.6028	41.186	62.286
0.225625	0.348029	0.482513	0.550282	0.721251	0.822806	0.984375	1.0445	1.25484	1.51524	1.74015	1.92205	2.1653	2.47321	2.86847	3.38324	3.99399	4.61108	5.60023	7.1859	8.80452	10.9228	15.3073	18.704	23.0463	30.645	41.3243	62.3515
0.226003	0.348029	0.482709	0.550282	0.721714	0.826181	0.984375	1.04565	1.25484	1.5163	1.74015	1.92205	2.17862	2.47321	2.86992	3.38811	4.00612	4.62368	5.6118	7.27123	8.81139	10.9228	15.4515	18.7673	23.1119	30.7016	41.3298	62.3609
0.226247	0.348029	0.483979	0.551219	0.722287	0.826614	0.984375	1.04922	1.25484	1.5196	1.74015	1.92205	2.1812	2.47321	2.87881	3.39735	4.01104	4.62482	5.61719	7.28425	8.81263	10.9505	15.4961	18.7968	23.1339	30.7387	41.3531	62.3737
0.226596	0.348029	0.485072	0.552688	0.723174	0.829213	0.984375	1.05231	1.25484	1.54239	1.74219	1.92205	2.19649	2.47321	2.87908	3.40096	4.01415	4.63289	5.62629	7.28787	8.86129	11.0276	15.5061	18.8451	23.1342	30.8355	41.651	62.5841
0.226952	0.348029	0.487137	0.552866	0.725456	0.829851	0.989268	1.05874	1.25484	1.55634	1.7444	1.92205	2.20113	2.47321	2.88045	3.40126	4.0154	4.63383	5.64177	7.29447	8.89349	11.0347	15.5195	18.898	23.1521	30.8743	41.8896	62.6501
0.22699	0.348029	0.48741	0.554217	0.727254	0.83283	0.989366	1.06336	1.25484	1.55643	1.74658	1.92205	2.20113	2.47321	2.88226	3.40399	4.04481	4.64021	5.66824	7.30294	8.89349	11.0551	15.6333	18.9127	23.353	30.8894	42.0217	62.8831
0.228138	0.348029	0.488133	0.55465	0.733112	0.835959	0.994073	1.06387	1.25958	1.55643	1.74682	1.92205	2.21484	2.47561	2.89133	3.41443	4.04765	4.65495	5.68152	7.31689	8.91729	11.1369	15.7365	18.9236	23.4113	30.9346	42.0739	63.0538
0.228848	0.348029	0.489715	0.55465	0.734911	0.836681	1.0003	1.0642	1.27215	1.55643	1.75447	1.92702	2.2198	2.47711	2.8921	3.41937	4.04801	4.6693	5.72399	7.31689	8.91729	11.1614	15.8259	19.183	23.4617	30.9432	42.2508	63.0623
0.228994	0.348029	0.490358	0.55465	0.738281	0.836755	1.0013	1.06691	1.27334	1.55643	1.75872	1.92751	2.22847	2.49724	2.89345	3.42769	4.04805	4.6693	5.74512	7.31689	8.91729	11.2694	15.8363	19.2552	23.4875	30.9632	42.2814	63.2925
0.229527	0.348029	0.491532	0.55465	0.738281	0.841828	1.00341	1.0694	1.28307	1.55777	1.75944	1.93005	2.22847	2.49774	2.89506	3.42769	4.05284	4.68225	5.76563	7.31689	8.92069	11.2935	15.8497	19.2938	23.5968	30.9922	42.3736	63.3028
0.229708	0.348029	0.492188	0.55465	0.738281	0.842346	1.00672	1.07523	1.28976	1.5637	1.76252	1.93317	2.22847	2.49788	2.89929	3.44598	4.05868	4.70829	5.76616	7.31689	8.95017	11.3123	15.8516	19.3712	23.616	31.0608	42.391	63.466
0.229966	0.348029	0.492188	0.555677	0.738281	0.843378	1.01189	1.07552	1.29429	1.56631	1.76303	1.96875	2.22847	2.50511	2.90057	3.44747	4.06541	4.71459	5.78393	7.32928	8.95795	11.4162	15.9373	19.443	23.6555	31.2229	42.4121	63.6301
0.230932	0.348029	0.492188	0.556416	0.738281	0.844209	1.01467	1.08176	1.29503	1.56763	1.77196	1.97842	2.22847	2.50592	2.91264	3.44843	4.0695	4.7213	5.80802	7.3746	8.95795	11.4189	15.9411	19.4912	23.6877	31.2888	42.4892	63.6855
0.231045	0.348029	0.492188	0.556434	0.738281	0.845429	1.01467	1.08208	1.29513	1.56976	1.77461	1.98147	2.22847	2.50621	2.91752	3.45409	4.07358	4.74329	5.82345	7.38281	9.03513	11.509	15.9506	19.4996	23.6877	31.3091	42.5478	63.8882
0.231069	0.348029	0.492188	0.558269	0.738281	0.846581	1.01467	1.08774	1.29657	1.57577	1.77461	1.98407	2.22847	2.50953	2.92033	3.45409	4.0792	4.74727	5.8253	7.38281	9.08908	11.5978	15.9809	19.5021	23.7026	31.3188	42.6765	64.0261
0.231345	0.348029	0.492188	0.560801	0.738281	0.846879	1.01467	1.08826	1.30558	1.57577	1.77461	1.98407	2.22881	2.50967	2.92446	3.46003	4.09382	4.75181	5.84489	7.38281	9.09313	11.6082	15.9961	19.5234	23.7388	31.3236	42.6935	64.1097
0.231497	0.348029	0.492188	0.56319	0.738281	0.848726	1.01467	1.09689	1.31074	1.57577	1.77461	1.98407	2.22901	2.50967	2.92707	3.47484	4.09428	4.75286	5.84958	7.3992	9.11556	11.6317	15.9961	19.5408	23.7418	31.3438	42.8465	64.1168
0.231998	0.348029	0.492188	0.563744	0.738281	0.849705	1.01467	1.10056	1.31118	1.57577	1.77461	1.98407	2.24043	2.51469	2.92751	3.47927	4.12406	4.753	5.85647	7.41077	9.15852	11.6873	16.0245	19.5523	23.7643	31.4187	42.8511	64.1281
0.23232	0.348029	0.492188	0.564456	0.738281	0.857467	1.01467	1.10056	1.31972	1.57577	1.77461	1.98407	2.26014	2.5155	2.9466	3.48027	4.12528	4.75385	5.86	7.41963	9.18823	11.7755	16.0245	19.5904	23.7643	31.4201	42.9376	64.2324
0.232483	0.348029	0.492188	0.564501	0.738281	0.85824	1.01467	1.10056	1.32105	1.57577	1.77461	1.98407	2.26627	2.5193	2.95918	3.4815	4.15877	4.77209	5.9165	7.42204	9.18823	11.7861	16.0245	19.6099	23.7687	31.4432	42.9713	64.2606
0.232864	0.348029	0.492188	0.567465	0.738281	0.859622	1.01467	1.10056	1.32526	1.57577	1.78244	1.98407	2.26887	2.53369	2.96183	3.49765	4.17468	4.77828	5.9165	7.44001	9.19247	11.7986	16.049	19.6151	23.7732	31.5709	42.9784	64.3663
0.232992	0.348029	0.492188	0.570039	0.738281	0.861057	1.01467	1.10056	1.32526	1.57577	1.78509	1.98407	2.26887	2.53857	2.96336	3.50114	4.17678	4.77828	5.95221	7.4725	9.19482	12.0236	16.0641	19.6343	23.8152	31.7229	43.0101	64.5019
0.233806	0.348029	0.492188	0.571473	0.738281	0.874196	1.01467	1.10056	1.32526	1.57577	1.78952	1.98407	2.26887	2.55776	2.96336	3.50216	4.18359	4.78393	5.98772	7.48465	9.21813	12.0424	16.123	19.6703	23.868	31.7279	43.204	64.5277
0.23405	0.348029	0.492188	0.572059	0.738281	0.87459	1.01467	1.10056	1.32526	1.57577	1.79159	1.99982	2.26887	2.56929	2.96336	3.52225	4.18359	4.78816	5.98794	7.48465	9.25658	12.0655	16.1487	19.7029	23.8724	31.8156	43.3126	64.6833
0.23416	0.348029	0.492188	0.574464	0.738281	0.887304	1.01467	1.10056	1.32526	1.57577	1.79159	2.02026	2.26887	2.56981	2.96884	3.52353	4.1847	4.81039	5.99277	7.49678	9.26372	12.0686	16.1918	19.7167	23.8749	31.8565	43.3467	64.8236
0.234496	0.348029	0.492188	0.577051	0.738281	0.887304	1.01467	1.10056	1.32526	1.57698	1.79159	2.02271	2.26887	2.57813	2.96937	3.52353	4.18582	4.81451	6.00147	7.49678	9.26372	12.1561	16.1936	19.7259	23.9529	31.9553	43.3583	65.088
0.234831	0.348029	0.492188	0.577133	0.738281	0.887304	1.01467	1.10592	1.32526	1.58445	1.79159	2.02463	2.26887	2.58109	2.97356	3.52353	4.19083	4.81515	6.00625	7.52902	9.28342	12.1586	16.2664	19.7566	23.9885	32.0185	43.3921	65.1308
0.234831	0.348029	0.492188	0.577666	0.738281	0.887304	1.01467	1.10783	1.32526	1.58536	1.79159	2.02934	2.27502	2.5894	2.97356	3.52353	4.20525	4.8162	6.00791	7.55724	9.30536	12.1586	16.2664	19.7933	23.997	32.0385	43.4895	65.5266
0.235225	0.348029	0.492188	0.57774	0.738281	0.887304	1.01467	1.10819	1.32724	1.59058	1.79159	2.02934	2.2827	2.61601	2.97569	3.52353	4.20525	4.8329	6.03306	7.5696	9.32391	12.2603	16.2664	19.816	24.1065	32.0584	43.5036	65.5631
0.235303	0.348029	0.492188	0.577825	0.742258	0.887304	1.01467	1.1093	1.33189	1.59288	1.79236	2.03237	2.28688	2.61601	2.98414	3.54437	4.20554	4.83498	6.09573	7.59645	9.3386	12.2874	16.2758	19.8407	24.1133	32.1547	43.5975	65.7175
0.235818	0.348029	0.492188	0.579681	0.742266	0.887304	1.01467	1.1093	1.33306	1.59592	1.80051	2.03352	2.28688	2.61601	2.98994	3.54898	4.20712	4.83498	6.13017	7.59709	9.3548	12.2998	16.3715	19.8685	24.123	32.1575	43.6423	65.774
0.236047	0.348029	0.492188	0.579866	0.744486	0.887304	1.01467	1.11373	1.34538	1.59655	1.80751	2.03434	2.3047	2.6289	2.99386	3.54939	4.21683	4.84778	6.15097	7.59709	9.38066	12.4102	16.5171	19.8788	24.1486	32.1593	43.684	65.852
0.236746	0.348029	0.492188	0.583741	0.746314	0.887304	1.01467	1.12119	1.34724	1.59707	1.81605	2.04129	2.30606	2.64952	2.99386	3.55197	4.22367	4.84891	6.15234	7.63287	9.41932	12.5024	16.5176	19.9467	24.2349	32.194	43.7722	65.9329
0.237105	0.348029	0.492188	0.590217	0.746618	0.887304	1.01467	1.12461	1.36214	1.61115	1.84282	2.0426	2.30829	2.65051	2.99386	3.56023	4.23244	4.84896	6.15726	7.6423	9.43217	12.5484	16.5378	19.9473	24.2958	32.2507	43.8137	65.99
0.237323	0.348029	0.492188	0.590286	0.746797	0.887304	1.01467	1.12825	1.36377	1.61347	1.85296	2.04501	2.31052	2.65051	2.99386	3.56047	4.24824	4.86389	6.16136	7.68821	9.49935	12.5604	16.5467	20.0306	24.3633	32.2789	43.8157	66.1484
0.237376	0.348029	0.492188	0.590482	0.747264	0.887304	1.01467	1.13209	1.36467	1.62265	1.85799	2.06163	2.31074	2.65051	2.99386	3.56169	4.24996	4.87425	6.16709	7.68821	9.49935	12.5604	16.5543	20.1512	24.3732	32.3536	43.9384	66.313
0.238639	0.348029	0.492188	0.595207	0.749672	0.887304	1.01467	1.13479	1.36938	1.62313	1.86113	2.06466	2.32164	2.65051	3.00326	3.56644	4.26718	4.88696	6.17133	7.70395	9.54558	12.5725	16.5571	20.1887	24.4129	32.3675	43.9476	66.3272
0.238844	0.348029	0.492188	0.597529	0.750861	0.887304	1.01803	1.14634	1.37058	1.62977	1.87419	2.06906	2.32164	2.65051	3.00396	3.56933	4.26765	4.89084	6.19041	7.70395	9.57238	12.6541	16.5762	20.2246	24.4625	32.4415	43.9548	66.6083
0.23906	0.348029	0.492188	0.600102	0.75921	0.887304	1.02077	1.1541	1.37101	1.65083	1.87419	2.07619	2.33465	2.65051	3.00396	3.57254	4.27257	4.89137	6.20369	7.71845	9.57238	12.7019	16.5908	20.2934	24.5143	32.4427	43.9909	66.6525
0.239255	0.348029	0.492188	0.605398	0.760945	0.887304	1.02272	1.15731	1.37132	1.65085	1.87419	2.08817	2.33465	2.65051	3.02038	3.59384	4.28195	4.91226	6.20903	7.72358	9.61027	12.7138	16.5908	20.3111	24.5341	32.4494	44.0632	66.6701
0.239723	0.348029	0.492188	0.605938	0.763284	0.887304	1.02658	1.15806	1.37495	1.65085	1.87419	2.08817	2.34348	2.65183	3.02778	3.59531	4.28195	4.92699	6.2306	7.72358	9.61027	12.7748	16.6218	20.3188	24.5416	32.6142	44.0691	66.7382
0.240209	0.348029	0.492188	0.606179	0.763638	0.887304	1.02771	1.16462	1.37631	1.65085	1.87419	2.08817	2.3441	2.65344	3.02983	3.59826	4.28928	4.92802	6.31778	7.72358	9.63866	12.8559	16.6287	20.3468	24.5773	32.6749	44.1004	67.1056
0.240268	0.348029	0.492188	0.606972	0.766088	0.887304	1.02854	1.16634	1.37973	1.65085	1.88364	2.08817	2.35555	2.65946	3.0442	3.61254	4.29349	4.93978	6.32691	7.72358	9.67621	12.8959	16.6418	20.3604	24.586	32.7214	44.1668	67.5952
0.240457	0.348029	0.492188	0.607737	0.766853	0.887304	1.03669	1.16775	1.3843	1.65085	1.88409	2.08976	2.37438	2.66302	3.06095	3.6408	4.29456	4.94459	6.38422	7.73277	9.70241	12.8959	16.6854	20.3604	24.6037	32.9002	44.1927	67.7098
0.240459	0.348029	0.492188	0.608305	0.771492	0.887304	1.03769	1.16911	1.38928	1.65241	1.88747	2.10263	2.37468	2.67184	3.06613	3.65348	4.29784	4.95143	6.39844	7.81711	9.71275	12.9029	16.7086	20.3604	24.6143	32.903	44.1982	67.7263
0.240546	0.348029	0.492188	0.608733	0.772263	0.887304	1.04039	1.17109	1.38986	1.65578	1.90012	2.10263	2.40602	2.67241	3.08355	3.65955	4.29784	4.95254	6.41734	7.81711	9.75103	12.9116	16.709	20.3604	24.6794	32.9802	44.2508	67.9437
0.241464	0.348029	0.492188	0.611752	0.773576	0.887304	1.0417	1.17517	1.39065	1.65704	1.90223	2.10263	2.4101	2.68665	3.08373	3.65957	4.30488	4.95254	6.41903	7.82098	9.75103	12.9193	16.709	20.3647	24.6794	33.0215	44.2777	68.0933
0.241683	0.348029	0.492188	0.613232	0.774335	0.887304	1.04242	1.17855	1.39212	1.66906	1.91514	2.10263	2.41493	2.68751	3.10867	3.66431	4.30488	4.97994	6.44089	7.82098	9.79274	12.9847	16.7199	20.3839	24.7713	33.0323	44.3448	68.1524
0.241905	0.348029	0.492188	0.613622	0.774438	0.887304	1.04409	1.18199	1.39212	1.67593	1.92205	2.10263	2.4164	2.69181	3.11287	3.69141	4.30488	5.01297	6.45651	7.82098	9.7975	13.0017	16.7507	20.3902	24.7725	33.0728	44.3578	68.2077
0.242361	0.348029	0.492188	0.614603	0.775335	0.887304	1.04409	1.18778	1.39365	1.67919	1.92205	2.11103	2.42374	2.69747	3.11287	3.6996	4.32728	5.01319	6.45967	7.83216	9.80059	13.0824	16.7605	20.3946	24.7859	33.1798	44.3652	68.2218
0.242778	0.348029	0.492188	0.617324	0.778217	0.887304	1.04409	1.20171	1.40438	1.68452	1.92205	2.11698	2.42374	2.698	3.11287	3.70861	4.34399	5.01644	6.46285	7.85189	9.80677	13.1188	16.7633	20.4495	24.7981	33.3309	44.3988	68.2602
0.242853	0.348029	0.492188	0.619478	0.778217	0.887304	1.04409	1.21335	1.40781	1.68905	1.92205	2.11698	2.42374	2.69832	3.11339	3.72407	4.34966	5.01935	6.49706	7.86346	9.84375	13.1393	16.7704	20.5455	24.827	33.3446	44.4674	68.3291
0.243684	0.348029	0.492188	0.619807	0.778217	0.894346	1.04409	1.21695	1.41427	1.68947	1.92205	2.11698	2.42962	2.70021	3.11973	3.72461	4.36735	5.04081	6.51176	7.875	9.87837	13.1439	16.7958	20.5544	24.9049	33.3687	44.5865	68.3308
0.243696	0.348029	0.492188	0.624801	0.778217	0.894346	1.04409	1.22806	1.41484	1.69176	1.92205	2.11744	2.4362	2.70274	3.12123	3.74083	4.40226	5.04942	6.52509	7.87884	9.92036	13.1994	16.8078	20.5787	24.9151	33.3906	44.6	68.5401
0.243916	0.348029	0.492188	0.626087	0.778217	0.901971	1.05094	1.23047	1.42147	1.69216	1.92205	2.13402	2.4362	2.70703	3.12461	3.74889	4.40226	5.07335	6.53683	7.90953	9.92036	13.2486	16.8567	20.6044	25.0121	33.4199	44.7546	68.549
0.245045	0.348029	0.492188	0.626137	0.778217	0.905638	1.05133	1.23047	1.42982	1.69389	1.92416	2.13553	2.4451	2.70703	3.13123	3.75259	4.43021	5.0912	6.53887	7.92483	9.95419	13.3096	16.8695	20.6382	25.0257	33.421	44.8526	68.7201
0.245154	0.348029	0.492188	0.626138	0.778217	0.905804	1.05237	1.23047	1.43273	1.69697	1.92435	2.13762	2.44615	2.71006	3.1422	3.75646	4.43072	5.12088	6.55151	7.93628	9.96604	13.3255	16.8821	20.6558	25.0593	33.4658	44.9328	68.732
0.245213	0.348029	0.492188	0.62741	0.778217	0.908658	1.0557	1.23047	1.43496	1.71119	1.92747	2.14835	2.46094	2.71678	3.14633	3.75646	4.43652	5.13006	6.57735	7.94391	9.97211	13.3347	16.8875	20.661	25.0967	33.4877	45.0379	68.7589
0.246086	0.348029	0.492188	0.631134	0.778217	0.909522	1.0609	1.23047	1.43496	1.71806	1.93248	2.15973	2.46094	2.71819	3.14653	3.76451	4.43652	5.13859	6.60134	7.94556	10.0176	13.4634	16.8875	20.6909	25.0967	33.6567	45.1509	69.2027
0.246094	0.348029	0.492188	0.631523	0.778217	0.91201	1.06711	1.23047	1.43496	1.71981	1.94017	2.1717	2.46094	2.71819	3.16427	3.7714	4.43652	5.13859	6.61872	7.97769	10.0176	13.4661	16.9305	20.6997	25.1462	33.678	45.1691	69.6295
0.246094	0.348029	0.492188	0.631661	0.778217	0.914399	1.06752	1.23047	1.43496	1.72023	1.94538	2.1922	2.46094	2.71819	3.169	3.78146	4.43652	5.13859	6.62628	7.98573	10.0214	13.576	16.939	20.7245	25.1787	33.6974	45.2327	69.6689
0.246094	0.348029	0.492188	0.63226	0.778217	0.914553	1.06977	1.23047	1.43496	1.72266	1.94716	2.197	2.46094	2.71913	3.17278	3.78489	4.43652	5.1543	6.66274	8.01223	10.0417	13.6283	16.9519	20.7435	25.1984	33.7316	45.3658	69.7273
0.246094	0.348029	0.492188	0.636703	0.778217	0.914967	1.07301	1.23047	1.43496	1.72266	1.95772	2.1986	2.46094	2.72138	3.17562	3.79071	4.45686	5.16957	6.66274	8.01601	10.0417	13.6443	16.9577	20.7442	25.2914	33.739	45.3788	69.8038
0.246094	0.348029	0.492188	0.642242	0.778217	0.919336	1.08262	1.23047	1.43496	1.72266	1.95809	2.20047	2.46094	2.72525	3.18779	3.79869	4.49079	5.19722	6.67482	8.03488	10.055	13.6443	17.036	20.8484	25.3369	33.7472	45.4055	69.8568
0.246094	0.348029	0.492188	0.642576	0.778217	0.920237	1.08913	1.23047	1.43496	1.72266	1.96875	2.20072	2.46418	2.73141	3.1989	3.81337	4.49232	5.20562	6.69447	8.04617	10.1035	13.7222	17.0588	20.8817	25.3381	33.752	45.4555	69.891
0.246094	0.348029	0.492188	0.643939	0.778217	0.921292	1.09571	1.23047	1.43496	1.72266	1.96875	2.20113	2.46457	2.7334	3.19922	3.8204	4.49292	5.22044	6.70186	8.04617	10.1134	13.7263	17.0676	20.9411	25.3668	33.7909	45.5406	70.0784
0.246094	0.348029	0.492188	0.64693	0.778217	0.92267	1.09988	1.23047	1.43496	1.72266	1.96875	2.20113	2.47321	2.73993	3.20045	3.85082	4.50669	5.22044	6.72156	8.06121	10.1348	13.7571	17.0735	20.9541	25.387	33.7929	45.5433	70.2036
0.246094	0.348029	0.492188	0.646936	0.778217	0.926217	1.10056	1.23047	1.43496	1.72266	1.96875	2.20113	2.47321	2.74026	3.20145	3.85198	4.50856	5.22741	6.72471	8.09495	10.1735	13.8148	17.0942	20.983	25.4162	33.8019	45.544	70.5161
0.246094	0.348029	0.492188	0.650821	0.778217	0.926334	1.10056	1.23047	1.43496	1.72266	1.96875	2.20113	2.47321	2.74731	3.20637	3.85485	4.50948	5.22942	6.77093	8.09495	10.1771	13.8689	17.1384	20.9853	25.4383	33.8081	45.5976	70.5586
0.246094	0.348029	0.492188	0.657159	0.778217	0.93001	1.10056	1.23047	1.43957	1.72385	1.96875	2.20113	2.47321	2.75127	3.20843	3.86203	4.51768	5.23239	6.77093	8.09495	10.2209	13.9407	17.1763	21.0263	25.4442	33.8225	45.6095	70.7561
0.246094	0.348029	0.492188	0.657519	0.778217	0.930886	1.10056	1.23047	1.44366	1.72913	1.96875	2.20181	2.47321	2.75141	3.20867	3.88492	4.52438	5.26088	6.79129	8.10782	10.2248	13.9603	17.2195	21.0823	25.4668	33.8332	45.6342	70.9289
0.246094	0.348029	0.492188	0.658935	0.778217	0.931761	1.10056	1.23047	1.458	1.73129	1.97177	2.21484	2.47321	2.75141	3.20867	3.89108	4.53316	5.26664	6.85345	8.11736	10.2565	13.9748	17.2266	21.154	25.4709	33.8336	45.7615	71.1744
0.246094	0.348029	0.492947	0.659012	0.778217	0.932215	1.10056	1.23047	1.46879	1.74015	1.97415	2.21484	2.47868	2.75141	3.20867	3.89108	4.53774	5.28386	6.85538	8.12482	10.2772	14.0446	17.2283	21.1726	25.5523	33.9412	45.7771	71.1905
0.246094	0.348029	0.493536	0.660034	0.778217	0.933385	1.10056	1.23047	1.47656	1.74015	1.97417	2.21484	2.48482	2.76117	3.20867	3.90922	4.53774	5.28759	6.85538	8.14715	10.2801	14.1408	17.2705	21.2455	25.5985	33.9495	45.9089	71.4724
0.246094	0.348029	0.495291	0.660569	0.778217	0.934083	1.10056	1.23047	1.47656	1.74015	1.97877	2.21484	2.50455	2.7629	3.22611	3.92474	4.53774	5.32214	6.86064	8.18054	10.293	14.199	17.2903	21.272	25.6233	33.9674	45.9609	71.4861
0.246094	0.348029	0.495299	0.661587	0.778217	0.935785	1.10056	1.23047	1.47656	1.74015	1.98407	2.21484	2.50652	2.77046	3.23454	3.92628	4.54492	5.32382	6.86421	8.19512	10.3066	14.2221	17.2985	21.3138	25.6812	33.9815	46.1377	71.622
0.246094	0.348029	0.495662	0.663685	0.778217	0.937682	1.10056	1.23699	1.47656	1.74015	1.98407	2.21484	2.50967	2.77075	3.23686	3.92959	4.55354	5.33649	6.88006	8.24954	10.3066	14.32	17.2985	21.3206	25.7318	34.033	46.2113	71.6806
0.246094	0.348029	0.495669	0.665897	0.778217	0.944155	1.10056	1.23816	1.47656	1.74015	1.98407	2.21804	2.50967	2.77269	3.24022	3.93997	4.5713	5.3546	6.89502	8.25424	10.3313	14.3327	17.4061	21.3535	25.7565	34.0588	46.227	71.8834
0.246094	0.348029	0.495779	0.666101	0.778217	0.945835	1.10056	1.24023	1.48228	1.74015	1.98407	2.21848	2.51488	2.77916	3.26107	3.94518	4.58335	5.36039	6.89779	8.32726	10.3476	14.3363	17.4328	21.3551	25.9194	34.0713	46.2617	71.9569
0.246094	0.348029	0.495967	0.666252	0.778217	0.945866	1.10056	1.24023	1.4836	1.74015	1.98407	2.2201	2.51838	2.77924	3.27101	3.94947	4.59741	5.37477	6.91722	8.33821	10.3697	14.3369	17.4571	21.3778	25.9719	34.1353	46.2951	72.0429
0.246094	0.348029	0.496094	0.666263	0.778217	0.948749	1.10056	1.24514	1.48402	1.74015	1.98407	2.2225	2.5212	2.79207	3.27663	3.95755	4.59741	5.37477	6.93006	8.34268	10.374	14.3415	17.4779	21.4045	25.9719	34.1938	46.3186	72.1101
0.246094	0.348029	0.496094	0.667008	0.778217	0.950165	1.10056	1.25484	1.48658	1.74015	1.98407	2.22847	2.52169	2.79831	3.2833	3.96814	4.60372	5.44752	6.93006	8.35995	10.3893	14.3655	17.4882	21.4045	25.9754	34.2265	46.3519	72.1764
0.246094	0.348029	0.496094	0.667463	0.778217	0.953402	1.10056	1.25484	1.48742	1.74015	1.98407	2.22847	2.52306	2.8059	3.2833	3.97454	4.60404	5.45596	6.94752	8.36719	10.5131	14.3709	17.4923	21.4056	26.008	34.2734	46.3859	72.233
0.246094	0.348029	0.499602	0.668017	0.778217	0.956401	1.10056	1.25484	1.49357	1.74015	1.98407	2.23077	2.53341	2.8059	3.2833	3.97577	4.61716	5.46417	6.94752	8.37081	10.5131	14.3717	17.5004	21.4328	26.0627	34.3362	46.4622	72.2915
0.246094	0.348726	0.501	0.670852	0.778217	0.959181	1.10056	1.25484	1.49689	1.74015	1.98407	2.23455	2.53369	2.80671	3.29677	3.97998	4.62334	5.47094	6.94974	8.3816	10.5333	14.3732	17.5202	21.4384	26.065	34.3504	46.4907	72.3271
0.246094	0.350251	0.501591	0.671295	0.779987	0.960045	1.10056	1.25484	1.49693	1.74015	1.98407	2.23588	2.54438	2.80738	3.29766	3.9803	4.6339	5.50714	6.96493	8.38165	10.5444	14.3875	17.5211	21.4878	26.1103	34.4	46.5904	72.347
0.246094	0.350261	0.502072	0.672455	0.781086	0.964015	1.10056	1.25484	1.49693	1.74015	1.987	2.2363	2.55742	2.80813	3.30173	3.98415	4.63459	5.51359	6.96493	8.4105	10.5706	14.4023	17.5832	21.5244	26.211	34.4269	46.6417	72.4824
0.246094	0.350391	0.503648	0.67346	0.784393	0.967609	1.10056	1.25484	1.49693	1.74974	1.99048	2.24067	2.56122	2.80864	3.30411	3.99648	4.64416	5.55213	6.96928	8.4177	10.5849	14.4041	17.5895	21.5244	26.3035	34.4751	46.6703	72.5891
0.246094	0.350791	0.507134	0.674325	0.784437	0.973094	1.10056	1.25484	1.49693	1.75178	1.99093	2.24486	2.56165	2.8204	3.3063	4.005	4.6549	5.55997	6.99963	8.4177	10.5849	14.4154	17.5912	21.5872	26.3228	34.5111	46.7615	72.5989
0.246094	0.351455	0.507212	0.67475	0.78626	0.973367	1.10191	1.25484	1.49693	1.75197	2.00005	2.25271	2.56253	2.83031	3.31085	4.01068	4.66038	5.6118	6.99963	8.4177	10.5935	14.4191	17.6228	21.6029	26.3668	34.5637	46.7711	72.7056
0.246094	0.352308	0.509628	0.676188	0.786887	0.974381	1.1093	1.25484	1.49693	1.7536	2.00014	2.25996	2.56752	2.84345	3.31194	4.01714	4.6693	5.6118	7.00395	8.46791	10.6078	14.4191	17.6309	21.6227	26.4009	34.5672	46.8297	72.7581
0.246094	0.352471	0.512532	0.678827	0.792332	0.975624	1.11028	1.25484	1.49693	1.75781	2.01221	2.26887	2.56929	2.84675	3.3181	4.02597	4.68225	5.6118	7.01592	8.48577	10.6201	14.4931	17.6811	21.6786	26.46	34.7037	46.9955	72.8413
0.246094	0.353317	0.514621	0.680104	0.795569	0.978304	1.11387	1.25484	1.49693	1.75845	2.01691	2.26887	2.57631	2.8469	3.34724	4.07358	4.68556	5.62258	7.04705	8.51049	10.676	14.513	17.701	21.6912	26.4836	34.7157	47.0271	73.0523
0.246094	0.35666	0.515185	0.68029	0.797737	0.980234	1.11424	1.25484	1.49693	1.7595	2.02934	2.26887	2.57931	2.84868	3.34724	4.07826	4.6865	5.62258	7.04705	8.53042	10.7213	14.5612	17.7205	21.7065	26.5368	34.789	47.0368	73.1525
0.246094	0.35703	0.517679	0.684628	0.803765	0.980361	1.11457	1.25484	1.51242	1.75986	2.02934	2.26887	2.58444	2.8512	3.34724	4.08137	4.70826	5.63956	7.04705	8.56997	10.7463	14.5673	17.7205	21.7149	26.5565	34.8047	47.2103	73.1755
0.246094	0.357883	0.518543	0.684834	0.804278	0.984375	1.11693	1.25484	1.51281	1.7659	2.02934	2.26887	2.59768	2.8522	3.34724	4.10999	4.71299	5.65635	7.04705	8.59618	10.7495	14.6545	17.7802	21.7567	26.5929	34.8116	47.2558	73.1839
0.246094	0.358712	0.518956	0.686897	0.806095	0.984375	1.12109	1.25484	1.51541	1.76797	2.02934	2.26887	2.61501	2.85447	3.34724	4.12888	4.73371	5.71218	7.08562	8.59874	10.7945	14.6805	17.7802	21.7817	26.6809	34.877	47.311	73.2242
0.246094	0.35959	0.519602	0.690838	0.806245	0.984375	1.12353	1.25484	1.52936	1.77461	2.02934	2.26887	2.62438	2.85498	3.34724	4.13053	4.73371	5.74033	7.08562	8.60059	10.7945	14.7204	17.787	21.8567	26.7147	34.8803	47.3761	73.404
0.246094	0.360745	0.520281	0.692233	0.806424	0.984375	1.12463	1.25484	1.53495	1.77461	2.03125	2.26887	2.63407	2.85971	3.34724	4.15218	4.74123	5.74127	7.10269	8.63654	10.8878	14.743	17.7917	21.8763	26.7881	34.9506	47.5273	73.4983
0.246094	0.36076	0.52063	0.692582	0.814066	0.984375	1.12606	1.25763	1.54741	1.77461	2.06308	2.27527	2.6418	2.86127	3.35939	4.16406	4.74257	5.74207	7.10269	8.64136	10.8989	14.743	17.8023	21.8913	26.8005	34.9878	47.6414	73.5227
0.246094	0.361539	0.52317	0.696058	0.815124	0.984375	1.12706	1.26281	1.54988	1.77461	2.06626	2.2784	2.65051	2.8665	3.37292	4.16437	4.74434	5.74787	7.10658	8.69109	10.9228	14.7677	17.804	21.9007	26.9268	35.14	47.6463	73.6324
0.246094	0.361751	0.524316	0.696058	0.817896	0.984375	1.13062	1.26735	1.55474	1.77461	2.07359	2.28257	2.65051	2.86992	3.37507	4.16463	4.75203	5.7999	7.13297	8.7354	10.9643	14.7697	17.8414	21.9036	27.1117	35.1578	47.6809	73.6746
0.246094	0.362528	0.525376	0.696058	0.820257	0.984375	1.13075	1.26987	1.55643	1.77461	2.08142	2.28411	2.65051	2.86992	3.42043	4.18359	4.76799	5.80802	7.13672	8.75609	10.9974	14.8066	17.9076	21.9343	27.1494	35.2426	47.7593	73.6988
0.246094	0.362531	0.525643	0.696058	0.821568	0.984375	1.13285	1.27116	1.55643	1.77461	2.08817	2.28622	2.65051	2.88045	3.4254	4.18359	4.77828	5.83403	7.13672	8.76648	11.0056	14.8168	17.9243	21.9369	27.1652	35.2773	47.9263	73.7896
0.246094	0.36339	0.526897	0.696058	0.824901	0.984375	1.13422	1.27596	1.55643	1.77461	2.09609	2.28685	2.65051	2.88045	3.42687	4.18359	4.79349	5.91137	7.14096	8.79419	11.0742	14.8678	17.9665	21.9568	27.1882	35.316	47.9687	74.1004
0.246094	0.364041	0.529859	0.696058	0.825642	0.984375	1.13475	1.27979	1.55643	1.77868	2.09947	2.28937	2.65425	2.89477	3.45409	4.18359	4.79584	5.91137	7.14096	8.82403	11.0999	14.8739	17.9761	22.0294	27.2276	35.3434	47.9883	74.1331
0.246094	0.364301	0.532793	0.696058	0.829166	0.984375	1.14082	1.28106	1.55643	1.77967	2.09986	2.30002	2.65928	2.89651	3.45409	4.19083	4.80877	5.9165	7.15367	8.90554	11.1179	14.9227	17.9918	22.0388	27.2487	35.5007	48.1804	74.1702
0.246094	0.365538	0.533035	0.696058	0.829878	0.984375	1.14263	1.28454	1.55643	1.78321	2.10263	2.32164	2.66191	2.90331	3.45409	4.19083	4.8162	5.92107	7.15367	8.90698	11.1424	14.9814	17.9918	22.1238	27.2696	35.5135	48.1854	74.1865
0.246094	0.366088	0.533121	0.696058	0.832372	0.984375	1.14282	1.28765	1.55643	1.78386	2.10263	2.3276	2.66191	2.90386	3.45502	4.19083	4.82289	5.92672	7.1748	8.92904	11.1505	14.9814	18.0519	22.1258	27.2883	35.528	48.3037	74.2575
0.246094	0.366493	0.533302	0.696058	0.832527	0.984375	1.14439	1.2896	1.55643	1.79093	2.10263	2.32955	2.66191	2.92367	3.4556	4.19557	4.84748	5.92672	7.17855	8.9478	11.158	15.0117	18.1059	22.1278	27.3474	35.5531	48.3811	74.335
0.246094	0.367627	0.533708	0.696058	0.833808	0.984557	1.15826	1.29646	1.55643	1.79159	2.10263	2.33465	2.66191	2.94635	3.48029	4.19764	4.84748	5.93216	7.21257	8.94833	11.1988	15.1623	18.1074	22.2099	27.3982	35.5603	48.4061	74.394
0.246094	0.367629	0.535748	0.696058	0.834186	0.987663	1.15882	1.29755	1.56226	1.79159	2.10263	2.33465	2.66438	2.95312	3.48029	4.20971	4.84781	5.94712	7.2372	8.94833	11.355	15.1623	18.1602	22.2352	27.493	35.5646	48.5339	74.6378
0.246094	0.367756	0.53591	0.696058	0.834796	0.992188	1.15936	1.30343	1.5651	1.79159	2.10329	2.33465	2.67359	2.95312	3.48645	4.21245	4.8577	5.9477	7.27123	8.95795	11.3888	15.2308	18.1635	22.2358	27.6645	35.5893	48.6424	74.8011
0.246094	0.367774	0.536039	0.696058	0.836134	0.993071	1.16037	1.31292	1.56796	1.79159	2.11334	2.33465	2.68078	2.9534	3.49458	4.23396	4.86088	5.95221	7.28787	8.95795	11.4021	15.236	18.1756	22.2643	27.6824	35.6063	48.7562	74.8263
0.246094	0.368002	0.536199	0.696058	0.837205	0.993133	1.16473	1.31473	1.56879	1.79159	2.11612	2.35686	2.70148	2.95925	3.49765	4.23446	4.88482	5.95221	7.29528	8.95795	11.4506	15.2994	18.2176	22.2766	27.6838	35.6485	48.9114	74.929
0.246094	0.368878	0.53649	0.696058	0.842811	0.997882	1.18558	1.31963	1.56879	1.79159	2.11698	2.36559	2.70703	2.96262	3.49765	4.24037	4.88482	5.95221	7.29949	8.98158	11.4718	15.3148	18.3118	22.2766	27.7563	35.6875	48.9139	75.0808
0.246094	0.36917	0.537064	0.696058	0.842859	0.999609	1.18689	1.32526	1.57133	1.79159	2.11698	2.37314	2.70703	2.96336	3.49765	4.24401	4.90338	5.97852	7.34168	9.02866	11.5422	15.3172	18.3571	22.2778	27.8197	35.7057	49.0394	75.0828
0.246094	0.370016	0.538114	0.696058	0.844617	1.00323	1.19455	1.32526	1.57312	1.79159	2.11698	2.37363	2.71819	2.96336	3.51079	4.24824	4.90338	5.98021	7.3746	9.04876	11.5544	15.3624	18.457	22.297	27.8304	35.7853	49.0832	75.2681
0.246094	0.370377	0.538125	0.696058	0.845107	1.00993	1.19799	1.32526	1.57577	1.79785	2.11698	2.37738	2.71819	2.96336	3.51217	4.24824	4.91744	5.99945	7.38691	9.05286	11.5899	15.3681	18.5069	22.3006	27.8869	35.8487	49.1014	75.2958
0.246094	0.37047	0.538387	0.696058	0.855736	1.01467	1.19861	1.32526	1.57577	1.80625	2.11698	2.38703	2.71819	2.97273	3.51463	4.27901	4.91866	6.02872	7.44001	9.05937	11.6348	15.4054	18.5274	22.307	27.8901	35.8571	49.1014	75.5351
0.246094	0.372007	0.538812	0.696058	0.858458	1.01467	1.19883	1.32526	1.57577	1.81241	2.11698	2.38908	2.71819	2.97356	3.51981	4.28195	4.92802	6.03306	7.4725	9.05943	11.6707	15.424	18.5523	22.3675	27.9149	35.8901	49.2415	75.6325
0.246094	0.372258	0.541065	0.696058	0.859449	1.01467	1.20589	1.32526	1.57577	1.82902	2.11698	2.38929	2.71819	2.97356	3.52178	4.282	4.92894	6.07807	7.4725	9.07549	11.6733	15.4846	18.5732	22.4185	27.94	35.9204	49.2777	75.846
0.246094	0.372973	0.542486	0.696058	0.861878	1.01467	1.20655	1.32526	1.57577	1.83686	2.11831	2.39032	2.71819	2.97356	3.52235	4.28733	4.93095	6.08802	7.47997	9.10547	11.6733	15.4961	18.6025	22.4241	27.9476	35.9434	49.4348	75.856
0.246094	0.380237	0.544296	0.696058	0.863398	1.01467	1.20845	1.32526	1.57577	1.84392	2.12133	2.40271	2.71819	2.98086	3.53463	4.29529	4.94114	6.10392	7.50081	9.10828	11.6733	15.4961	18.6545	22.4607	27.9812	35.9525	49.4581	76.0541
0.246094	0.38112	0.544853	0.696058	0.863935	1.01467	1.21075	1.32526	1.57577	1.85433	2.12766	2.40984	2.71819	2.98624	3.53501	4.29784	4.94642	6.12609	7.5029	9.10879	11.6914	15.5663	18.6918	22.4856	28.0297	35.9874	49.4728	76.4289
0.246094	0.383317	0.545892	0.698172	0.864559	1.01467	1.21237	1.32847	1.57577	1.85666	2.12769	2.4182	2.71859	2.98811	3.53619	4.29784	4.95254	6.15234	7.52531	9.13203	11.7224	15.6025	18.7436	22.4917	28.037	35.994	49.4918	76.5747
0.246094	0.383401	0.546444	0.699625	0.866449	1.01467	1.21419	1.33061	1.57577	1.85677	2.13053	2.42374	2.72754	3.0027	3.56578	4.29784	4.95254	6.15726	7.5491	9.13203	11.7319	15.6284	18.8217	22.5038	28.0411	36.0325	49.5425	76.6854
0.246094	0.3844	0.54726	0.701042	0.866998	1.01467	1.21431	1.33321	1.57577	1.86776	2.13141	2.42374	2.73162	3.00396	3.58318	4.29784	4.95254	6.16282	7.6408	9.15522	11.7562	15.6303	18.9185	22.5575	28.0892	36.1046	49.5993	76.7564
0.246094	0.384941	0.550282	0.701152	0.86971	1.01467	1.21902	1.33417	1.57577	1.87419	2.14007	2.43129	2.73977	3.00421	3.59473	4.29784	4.96427	6.19158	7.6408	9.15852	11.8027	15.6439	18.9627	22.5741	28.1118	36.159	49.6096	77.0095
0.246094	0.385041	0.550282	0.701583	0.871415	1.01467	1.22279	1.33577	1.57694	1.87419	2.14844	2.43763	2.73994	3.00551	3.60695	4.29842	4.97694	6.21975	7.66455	9.19482	11.8586	15.6801	18.9889	22.5768	28.1377	36.1984	49.6522	77.0428
0.246094	0.386962	0.550282	0.701583	0.8726	1.01467	1.2234	1.33577	1.58589	1.8762	2.15667	2.44028	2.74278	3.03075	3.62306	4.30082	4.97985	6.22573	7.66455	9.22441	11.9091	15.698	19.0275	22.6664	28.2247	36.2024	49.6568	77.129
0.246094	0.388396	0.550282	0.701583	0.875075	1.01467	1.22347	1.34345	1.58786	1.89113	2.15712	2.44042	2.74494	3.03247	3.63327	4.30488	4.98052	6.22573	7.66455	9.26372	11.9754	15.7057	19.1123	22.7287	28.2365	36.2386	49.662	77.1986
0.246094	0.388762	0.550282	0.702378	0.882828	1.01467	1.22821	1.35261	1.59626	1.89312	2.161	2.44684	2.75141	3.04068	3.64217	4.30488	4.99597	6.2792	7.66455	9.30601	12.0012	15.7269	19.1148	22.7409	28.31	36.3561	49.6707	77.4386
0.246094	0.38926	0.550282	0.703828	0.887304	1.01467	1.23047	1.35578	1.59725	1.89313	2.16167	2.4494	2.75141	3.04401	3.64422	4.30639	5.00592	6.30308	7.66455	9.31057	12.0083	15.7385	19.1311	22.8125	28.3574	36.3778	49.7718	77.4449
0.246094	0.389501	0.550282	0.704405	0.887304	1.01467	1.23047	1.35589	1.60715	1.89439	2.20113	2.45308	2.75612	3.04525	3.65745	4.34747	5.00631	6.30913	7.68821	9.31588	12.0352	15.8133	19.1416	22.8284	28.4228	36.3903	49.9091	77.4811
0.246094	0.389684	0.550282	0.706323	0.887304	1.01467	1.23047	1.35703	1.6109	1.89744	2.20113	2.45484	2.76007	3.07038	3.65845	4.35304	5.00683	6.32398	7.70395	9.37097	12.1326	15.8141	19.1798	22.8496	28.428	36.4239	50.0051	77.7259
0.246094	0.390962	0.550282	0.711112	0.887304	1.01467	1.23047	1.36628	1.61334	1.91002	2.20113	2.46094	2.76322	3.08167	3.66048	4.35384	5.00988	6.39844	7.70395	9.38198	12.2183	15.8821	19.1969	22.8496	28.4799	36.4767	50.0612	77.7376
0.246094	0.391111	0.550282	0.712389	0.887304	1.01467	1.23047	1.36809	1.61986	1.92165	2.20113	2.46094	2.76344	3.09826	3.67998	4.36079	5.0204	6.39844	7.70788	9.38767	12.2183	15.9031	19.2536	22.8586	28.5055	36.4933	50.0664	77.7726
0.246094	0.391498	0.550282	0.71292	0.887304	1.01467	1.23047	1.36984	1.62071	1.92205	2.20666	2.46094	2.76603	3.11287	3.69141	4.36181	5.02257	6.39844	7.72358	9.41932	12.2276	15.905	19.2677	22.8655	28.5255	36.6381	50.07	77.7863
0.246094	0.391724	0.550282	0.715764	0.887304	1.01467	1.23047	1.37482	1.62178	1.92205	2.21221	2.46094	2.7677	3.11949	3.69342	4.36772	5.0523	6.40317	7.7275	9.46742	12.3071	15.905	19.2677	22.892	28.5405	36.6397	50.1023	77.7999
0.246094	0.393245	0.550282	0.716201	0.887304	1.01467	1.23047	1.37977	1.63138	1.92205	2.21484	2.47321	2.76884	3.12429	3.69709	4.42862	5.05995	6.41734	7.77049	9.49026	12.3071	15.9677	19.2769	22.9033	28.5734	36.6548	50.1606	77.8193
0.246094	0.39392	0.550282	0.716306	0.887304	1.01467	1.23047	1.3843	1.63682	1.92205	2.21484	2.47321	2.76997	3.12803	3.69787	4.42969	5.06535	6.44742	7.78217	9.49935	12.3071	15.9961	19.3631	22.9158	28.62	36.7175	50.2049	77.8547
0.246094	0.394681	0.550282	0.716622	0.887304	1.01467	1.23047	1.38774	1.64093	1.92205	2.21496	2.48024	2.77314	3.15114	3.69883	4.43038	5.06738	6.45967	7.82098	9.49935	12.4223	16.0351	19.3728	22.9217	28.6559	36.7246	50.2417	77.9232
0.246094	0.397454	0.550282	0.71748	0.887304	1.01467	1.23047	1.39062	1.6415	1.92205	2.21675	2.48393	2.78064	3.19384	3.6996	4.43652	5.07281	6.45967	7.82098	9.50572	12.4287	16.0433	19.379	22.9224	28.7171	36.7299	50.2624	77.9565
0.246094	0.398777	0.550282	0.718673	0.887304	1.01467	1.23047	1.39212	1.65045	1.92205	2.21992	2.49314	2.79861	3.19589	3.70343	4.43652	5.07335	6.47372	7.83259	9.57238	12.4539	16.049	19.4211	22.9607	28.754	36.7308	50.264	78.2768
0.246094	0.399272	0.550282	0.720347	0.887304	1.01467	1.23047	1.39212	1.65085	1.92342	2.22226	2.50859	2.8059	3.19777	3.71978	4.43652	5.09705	6.49706	7.84764	9.58503	12.4539	16.049	19.4414	22.9805	28.7939	36.7348	50.2923	78.3711
0.246094	0.399509	0.550282	0.721301	0.887304	1.01467	1.23047	1.39535	1.65085	1.93379	2.22847	2.50967	2.8059	3.19922	3.72136	4.43652	5.10241	6.52052	7.85904	9.61027	12.5725	16.1093	19.4492	23.0541	28.8424	36.7362	50.3547	78.6215
0.246094	0.399535	0.550282	0.721408	0.887304	1.01467	1.23047	1.39558	1.65085	1.93821	2.2315	2.50967	2.8059	3.19922	3.72407	4.45733	5.11362	6.5666	7.86163	9.62601	12.5773	16.1168	19.4927	23.0681	28.9482	36.8068	50.3785	78.7688
0.246094	0.400192	0.550282	0.7231	0.887304	1.01614	1.23047	1.39572	1.65085	1.94004	2.23897	2.51266	2.8059	3.19922	3.72718	4.48158	5.12088	6.5666	7.87255	9.648	12.611	16.1936	19.5088	23.0765	28.9576	36.8853	50.396	78.7883
0.246094	0.401362	0.550282	0.726637	0.887304	1.01638	1.23047	1.40099	1.65085	1.94591	2.24572	2.51536	2.80625	3.19922	3.73967	4.4871	5.12407	6.56737	7.87996	9.68559	12.6158	16.1936	19.5094	23.0863	28.9764	36.9714	50.543	78.8134
0.246094	0.4016	0.550282	0.730547	0.887304	1.01936	1.23047	1.40207	1.65085	1.94799	2.25457	2.51685	2.81563	3.20087	3.74839	4.49079	5.13859	6.59077	7.88583	9.69432	12.7779	16.2235	19.5668	23.1069	28.9803	36.996	50.6503	78.8288
0.246094	0.404383	0.550282	0.731229	0.887304	1.02272	1.23047	1.40317	1.65085	1.94958	2.25482	2.52456	2.81565	3.20241	3.74839	4.49154	5.15954	6.59692	7.88789	9.69809	12.8003	16.2235	19.5904	23.1446	29.085	37.1602	50.6763	79.2139
0.246094	0.405004	0.550282	0.73363	0.887304	1.02272	1.23047	1.40684	1.65085	1.95946	2.25644	2.52509	2.8185	3.20867	3.74839	4.51459	5.16103	6.61179	7.90606	9.70745	12.8465	16.2365	19.5919	23.1695	29.1351	37.1895	50.7363	79.2456
0.246094	0.405125	0.550282	0.738195	0.887304	1.02272	1.23047	1.40853	1.65085	1.96765	2.26586	2.53369	2.82162	3.2169	3.74839	4.51768	5.17382	6.61255	7.90644	9.73549	12.865	16.2496	19.5925	23.1707	29.1857	37.2448	50.755	80.1284
0.246094	0.405927	0.550282	0.738281	0.887304	1.02338	1.23047	1.4096	1.65085	1.96875	2.26632	2.53369	2.82445	3.22461	3.74839	4.52161	5.17382	6.62628	7.90953	9.73549	12.8959	16.259	19.6189	23.1945	29.2148	37.261	50.8186	80.2741
0.246094	0.406126	0.550282	0.738281	0.887304	1.02451	1.23047	1.41067	1.65085	1.96875	2.26887	2.53369	2.8359	3.23123	3.75363	4.52438	5.18421	6.62628	7.90953	9.7577	12.9123	16.2631	19.6644	23.2172	29.2552	37.3625	50.823	80.2906
0.246094	0.406312	0.550282	0.738281	0.887304	1.0249	1.23047	1.41277	1.65337	1.97769	2.26887	2.53413	2.83681	3.23414	3.75875	4.52438	5.19239	6.62628	7.92483	9.76034	12.9193	16.2943	19.6937	23.2243	29.4131	37.4743	50.8248	80.3714
0.246094	0.406491	0.550282	0.738281	0.887304	1.02502	1.23047	1.41431	1.65635	1.97885	2.26887	2.53766	2.85836	3.23686	3.76451	4.52438	5.20014	6.62628	7.93005	9.80029	12.9685	16.3222	19.7013	23.2321	29.4254	37.4912	51.0103	80.5543
0.246094	0.407105	0.550282	0.738281	0.887304	1.02565	1.23047	1.41757	1.6625	1.9798	2.26887	2.56306	2.85862	3.25314	3.76451	4.53104	5.21053	6.62628	7.98573	9.80059	13.0523	16.3333	19.7075	23.2972	29.5105	37.5364	51.1226	80.8881
0.246094	0.408281	0.550282	0.738281	0.887304	1.02704	1.23047	1.42316	1.66395	1.98407	2.26887	2.56929	2.86083	3.26117	3.7754	4.53774	5.23202	6.62628	7.98573	9.82528	13.0665	16.3407	19.8639	23.3115	29.5375	37.542	51.1881	81.2124
0.246094	0.408698	0.550282	0.738281	0.887304	1.02816	1.23047	1.42316	1.66395	1.98407	2.26887	2.56929	2.8687	3.27458	3.80489	4.53774	5.23255	6.62628	8.00017	9.82528	13.1009	16.3611	19.9138	23.3322	29.5395	37.6451	51.3729	81.2695
0.246094	0.408823	0.550282	0.738281	0.887304	1.02976	1.23047	1.43139	1.66513	1.98407	2.26887	2.56929	2.87565	3.2833	3.80969	4.53774	5.24134	6.62628	8.00135	9.84179	13.1539	16.3833	19.9179	23.3346	29.5669	37.6708	51.3824	81.7657
0.246094	0.409026	0.550282	0.738281	0.887304	1.03361	1.23047	1.43257	1.67297	1.98407	2.28688	2.56929	2.88045	3.28906	3.8204	4.54329	5.32406	6.6297	8.01601	9.84683	13.1577	16.392	19.9397	23.3374	29.6377	37.7053	51.3918	81.8368
0.246094	0.40906	0.550282	0.738281	0.887304	1.0377	1.23047	1.43496	1.68388	1.98407	2.28899	2.57423	2.88142	3.29447	3.82105	4.57376	5.3311	6.64453	8.06121	9.87595	13.1746	16.4497	19.9442	23.3413	29.6397	37.7584	51.4159	82.1835
0.246094	0.409098	0.550282	0.738281	0.890106	1.0391	1.23225	1.43496	1.6893	1.98407	2.29813	2.57473	2.89271	3.30169	3.82855	4.5798	5.36036	6.64706	8.12232	9.96604	13.1907	16.4672	20.0702	23.4629	29.6538	37.8072	51.4406	82.1946
0.246094	0.409971	0.550282	0.738281	0.893885	1.04409	1.23243	1.43496	1.68968	1.98407	2.30346	2.57644	2.89501	3.30251	3.83132	4.59103	5.37477	6.64909	8.12482	10.009	13.2278	16.4722	20.0979	23.4714	29.6773	37.8601	51.4609	82.2483
0.246094	0.410271	0.550282	0.738281	0.894346	1.04409	1.23302	1.43496	1.69235	1.98407	2.30553	2.57674	2.89569	3.3029	3.8435	4.59415	5.37948	6.66643	8.13338	10.0101	13.2297	16.4949	20.1572	23.5367	29.6836	37.9209	51.4812	82.2929
0.246094	0.410418	0.550282	0.738281	0.894346	1.04409	1.23435	1.43496	1.71138	1.98407	2.31709	2.5827	2.89905	3.31085	3.84411	4.59588	5.39186	6.67879	8.14715	10.0176	13.2526	16.4956	20.1829	23.5801	29.7198	37.9974	51.5735	82.382
0.246094	0.410856	0.550282	0.738281	0.894346	1.04409	1.23489	1.43496	1.71347	1.98407	2.32164	2.58525	2.9017	3.31085	3.8462	4.60611	5.39726	6.6879	8.15087	10.0538	13.2731	16.5085	20.1992	23.6877	29.7221	38.0313	51.6546	82.4855
0.246094	0.411261	0.550282	0.738281	0.89592	1.04409	1.23569	1.43496	1.7139	1.98407	2.32164	2.59268	2.91055	3.32404	3.86227	4.61651	5.40286	6.69447	8.17278	10.1018	13.2982	16.5171	20.2486	23.7082	29.8383	38.1279	51.6676	82.6014
0.246094	0.411919	0.550282	0.738281	0.897432	1.04409	1.23645	1.43496	1.7187	1.98407	2.32164	2.59807	2.91552	3.33016	3.86797	4.62368	5.4277	6.69447	8.18054	10.1258	13.3111	16.5176	20.2516	23.791	29.8454	38.1341	51.682	82.7789
0.246094	0.412347	0.550282	0.738281	0.901709	1.04409	1.24207	1.43496	1.71986	1.99696	2.32606	2.6057	2.92239	3.33799	3.87934	4.62368	5.47953	6.69551	8.18054	10.1334	13.3209	16.5176	20.2725	23.8241	29.8804	38.1644	51.694	83.4113
0.246094	0.412733	0.550282	0.738281	0.904973	1.04409	1.24292	1.43496	1.72266	2.00171	2.33188	2.60588	2.93668	3.34724	3.87961	4.62368	5.48381	6.71705	8.18054	10.137	13.3731	16.5323	20.2725	23.8749	29.9973	38.4009	51.7265	83.5364
0.246094	0.413345	0.550282	0.738281	0.906967	1.04409	1.24314	1.43496	1.72266	2.01277	2.3343	2.60777	2.93789	3.34802	3.88151	4.6693	5.50282	6.71705	8.19163	10.1735	13.3889	16.6364	20.2934	23.8825	30.0913	38.4032	51.7716	83.7363
0.246094	0.413663	0.550282	0.738281	0.90789	1.04991	1.25484	1.44036	1.72266	2.01721	2.33465	2.61601	2.94238	3.34937	3.89787	4.6693	5.53027	6.71705	8.19533	10.1973	13.4428	16.6477	20.311	23.8952	30.0998	38.4216	51.7827	83.8024
0.246094	0.414772	0.550282	0.738281	0.909823	1.05668	1.25484	1.44308	1.73292	2.02287	2.33465	2.61601	2.94328	3.35065	3.91282	4.68225	5.53027	6.71955	8.21178	10.1973	13.4634	16.6488	20.3366	23.9015	30.1171	38.4348	51.8084	83.8891
0.246094	0.415457	0.550282	0.738281	0.914224	1.05951	1.25484	1.44635	1.73498	2.02813	2.33465	2.61601	2.95038	3.35447	3.91324	4.68225	5.53512	6.72156	8.21378	10.1973	13.487	16.6764	20.3604	23.9015	30.1342	38.4608	51.833	83.9472
0.246094	0.415728	0.550282	0.738281	0.917085	1.06215	1.25484	1.44635	1.73567	2.02934	2.33465	2.61961	2.95312	3.36773	3.9153	4.68899	5.59905	6.74231	8.25057	10.1973	13.5181	16.6921	20.3604	23.9776	30.153	38.4671	51.9033	84.195
0.246094	0.41594	0.550282	0.738281	0.91822	1.06716	1.25484	1.44637	1.74015	2.02934	2.33465	2.62602	2.95312	3.38752	3.93123	4.70161	5.62258	6.75689	8.2689	10.2418	13.5337	16.709	20.3604	23.9926	30.2102	38.4961	52.0321	84.2421
0.246094	0.41675	0.550282	0.738281	0.921039	1.07696	1.25484	1.45007	1.74015	2.03354	2.33476	2.63209	2.95893	3.39521	3.94438	4.72168	5.63631	6.7575	8.27256	10.2423	13.5506	16.7235	20.4273	24.0228	30.3797	38.5237	52.0795	84.2726
0.246094	0.417051	0.550282	0.73865	0.923325	1.08078	1.25484	1.45618	1.74015	2.03567	2.33901	2.64371	2.96056	3.39579	3.94518	4.75176	5.64832	6.7575	8.27256	10.2772	13.5553	16.738	20.4943	24.0367	30.3883	38.5355	52.2177	84.4277
0.246094	0.418456	0.550282	0.738694	0.923463	1.0866	1.25484	1.45647	1.74015	2.04625	2.3394	2.64926	2.96336	3.40004	3.96814	4.77397	5.66306	6.77036	8.29707	10.2831	13.5586	16.752	20.522	24.0417	30.3904	38.5457	52.2457	84.6337
0.246094	0.421461	0.550282	0.741927	0.923686	1.08718	1.25484	1.457	1.74015	2.04692	2.34063	2.65051	2.96336	3.40086	3.96814	4.77492	5.6655	6.80653	8.32728	10.3478	13.5666	16.802	20.5455	24.0833	30.4093	38.5991	52.3526	84.6906
0.246094	0.42352	0.550282	0.742675	0.924077	1.089	1.25484	1.46626	1.74015	2.04813	2.34301	2.65051	2.96336	3.40176	3.96814	4.77828	5.6655	6.80662	8.3316	10.3506	13.6195	16.8042	20.5662	24.0846	30.4292	38.61	52.357	84.7596
0.246094	0.424604	0.550282	0.744233	0.924985	1.09369	1.25484	1.47267	1.74015	2.04974	2.34504	2.65503	2.96586	3.41884	3.97577	4.79495	5.68152	6.80662	8.34092	10.3524	13.6344	16.8803	20.5853	24.1322	30.4401	38.8368	52.3584	84.9054
0.246094	0.425273	0.550282	0.746727	0.932175	1.09407	1.25484	1.47545	1.74015	2.05667	2.34545	2.65763	2.96665	3.41884	3.97577	4.80316	5.68152	6.85538	8.3492	10.374	13.6687	16.8803	20.6073	24.1744	30.454	38.8423	52.3717	84.9223
0.246094	0.425776	0.550282	0.748369	0.932864	1.10056	1.25484	1.47656	1.74015	2.06989	2.34875	2.66191	2.9701	3.42769	3.97577	4.81608	5.68152	6.86421	8.35632	10.3853	13.7152	16.8875	20.6382	24.1749	30.5882	38.9458	52.381	84.9266
0.246094	0.425816	0.550282	0.750036	0.937097	1.10056	1.25484	1.47656	1.74015	2.07253	2.36337	2.66191	2.97356	3.42769	3.97968	4.8162	5.68152	6.90392	8.36719	10.464	13.7284	16.8875	20.6558	24.1937	30.6179	38.9932	52.3873	85.1445
0.246094	0.425865	0.550282	0.751643	0.938499	1.10056	1.25484	1.47656	1.74015	2.07501	2.3675	2.66191	2.98958	3.42769	3.9807	4.8162	5.73984	6.91869	8.36719	10.4929	13.7559	16.8964	20.6558	24.2037	30.7144	38.9995	52.4018	85.1648
0.246094	0.426155	0.550282	0.755429	0.943445	1.10056	1.25484	1.47656	1.74015	2.07621	2.36892	2.66432	2.99107	3.44909	3.98311	4.8288	5.73984	6.93006	8.38165	10.5131	13.7571	16.9179	20.6558	24.2337	30.7863	39.1078	52.4038	85.3633
0.246094	0.426269	0.550282	0.756525	0.943597	1.10056	1.25484	1.47656	1.74015	2.08817	2.37375	2.66629	2.99386	3.45354	3.98327	4.83245	5.74512	6.93006	8.3997	10.5131	13.801	16.9519	20.6583	24.2349	30.8732	39.1516	52.452	85.4268
0.246094	0.426506	0.550282	0.760057	0.944169	1.10056	1.25484	1.47656	1.74015	2.08817	2.37972	2.6742	2.99386	3.45409	3.99007	4.84388	5.74512	6.93006	8.4177	10.5849	13.8626	16.9519	20.6733	24.2389	30.8776	39.19	52.5812	85.7664
0.246094	0.427117	0.550282	0.762285	0.94462	1.10056	1.25484	1.48132	1.74082	2.09862	2.38018	2.67672	2.99494	3.48029	4.00612	4.84748	5.74972	6.93268	8.4177	10.5849	13.8823	16.9519	20.7181	24.2786	30.9748	39.2039	52.6623	85.8599
0.246094	0.427176	0.550282	0.766594	0.948055	1.10056	1.25484	1.48163	1.74793	2.10007	2.38076	2.68406	3.00105	3.48826	4.01031	4.84748	5.76091	6.94974	8.42175	10.5849	13.9081	16.9555	20.7785	24.2786	30.9999	39.2471	52.6737	85.9812
0.246094	0.429518	0.550282	0.766616	0.950783	1.10056	1.25768	1.4823	1.75396	2.10263	2.38596	2.68583	3.00396	3.49341	4.03624	4.8478	5.76455	6.94974	8.42489	10.5935	13.932	17.025	20.8118	24.2786	31.0556	39.3519	52.7084	86.1497
0.246094	0.430153	0.550282	0.770563	0.958203	1.10056	1.26054	1.48265	1.75587	2.10263	2.38985	2.69918	3.00399	3.49765	4.03624	4.85357	5.76616	6.95452	8.4492	10.6277	13.9993	17.0517	20.8413	24.2786	31.0621	39.3921	52.7267	86.1964
0.246094	0.430706	0.550282	0.771429	0.963958	1.10056	1.26893	1.49219	1.76611	2.10263	2.39528	2.70556	3.00512	3.50233	4.03624	4.86216	5.76645	6.96058	8.47506	10.6277	14.0079	17.0676	20.8505	24.3247	31.1841	39.4027	52.8376	86.3256
0.246094	0.430848	0.550282	0.775963	0.966825	1.10056	1.27007	1.49693	1.76714	2.10263	2.39708	2.70703	3.02058	3.50572	4.04574	4.87488	5.79071	6.96608	8.48577	10.6335	14.0122	17.0854	20.9006	24.3832	31.2013	39.4057	52.8639	86.8376
0.246094	0.430902	0.550282	0.778137	0.972225	1.10056	1.27253	1.49693	1.77179	2.11271	2.40816	2.70703	3.04401	3.51876	4.05101	4.89225	5.80265	6.9685	8.48577	10.676	14.0295	17.1219	20.9021	24.3943	31.2346	39.4411	52.8814	86.854
0.246094	0.432486	0.550282	0.778217	0.972356	1.10056	1.27499	1.49693	1.77461	2.11698	2.4226	2.71117	3.04401	3.51963	4.05459	4.89778	5.80786	6.97312	8.48611	10.676	14.0877	17.1278	20.907	24.4241	31.2627	39.5109	52.907	86.9105
0.246094	0.433295	0.550282	0.778217	0.973484	1.10056	1.28278	1.49693	1.77461	2.11698	2.42374	2.71819	3.04401	3.52169	4.05868	4.90353	5.80802	6.9993	8.52693	10.676	14.1477	17.1744	20.9411	24.4427	31.3033	39.6604	52.9187	86.9467
0.246094	0.433467	0.550282	0.778217	0.975488	1.10056	1.28299	1.49693	1.77461	2.11698	2.42374	2.71819	3.04775	3.52353	4.05868	4.9145	5.81544	7.10269	8.54268	10.6775	14.1969	17.1917	20.9611	24.4511	31.3226	39.7235	52.9736	87.1283
0.246094	0.435777	0.550282	0.778217	0.976374	1.10056	1.2854	1.49693	1.77461	2.11698	2.42374	2.71819	3.05908	3.52353	4.05868	4.92188	5.82185	7.14096	8.57903	10.6846	14.2627	17.2353	20.97	24.4835	31.3256	39.8234	53.1007	87.2821
0.246094	0.436229	0.550282	0.778217	0.976632	1.10056	1.28824	1.49693	1.77461	2.11698	2.42461	2.71819	3.07849	3.52353	4.05868	4.92188	5.84958	7.15367	8.59569	10.6951	14.2772	17.2705	20.97	24.5169	31.34	39.8972	53.2255	87.4049
0.246094	0.437898	0.550282	0.778217	0.979822	1.10056	1.2893	1.49693	1.77709	2.12193	2.43288	2.71997	3.08262	3.53989	4.05868	4.92802	5.84958	7.1748	8.59569	10.7111	14.2862	17.2792	20.9859	24.5654	31.3679	39.9613	53.3564	87.9726
0.246094	0.437918	0.550282	0.778217	0.982461	1.10056	1.29464	1.49693	1.78869	2.12609	2.4362	2.72749	3.08355	3.5401	4.07288	4.92802	5.87025	7.1748	8.61307	10.7368	14.2862	17.2915	21.0263	24.5663	31.3783	40.027	53.3615	88.2736
0.246094	0.439227	0.551933	0.778217	0.984375	1.10056	1.29481	1.49693	1.79159	2.15331	2.4362	2.72784	3.08355	3.56476	4.07979	4.95254	5.90625	7.1748	8.62086	10.7945	14.2925	17.2985	21.0854	24.5663	31.396	40.0643	53.4069	88.2997
0.246094	0.439661	0.554287	0.778217	0.984375	1.10056	1.29596	1.49693	1.79159	2.15631	2.45059	2.732	3.08355	3.56705	4.08177	4.95423	5.90625	7.1748	8.64136	10.8113	14.2986	17.4571	21.091	24.6401	31.4485	40.0959	53.4409	88.4549
0.246094	0.441122	0.554428	0.778217	0.984375	1.10056	1.30141	1.49693	1.79159	2.15862	2.46094	2.73734	3.08639	3.56981	4.08917	4.97694	5.9165	7.18745	8.6436	10.8533	14.3369	17.4571	21.1698	24.6647	31.4856	40.1608	53.5202	88.5972
0.246094	0.442164	0.554542	0.778217	0.984375	1.10056	1.30788	1.49693	1.79159	2.17704	2.46094	2.7416	3.08938	3.57738	4.09582	4.97694	5.92672	7.18917	8.65537	10.8618	14.3496	17.5574	21.1698	24.7963	31.55	40.2038	53.7049	88.8102
0.246094	0.442252	0.554641	0.778217	0.984375	1.10056	1.31182	1.50139	1.79159	2.17785	2.46094	2.74173	3.09109	3.58435	4.09582	4.97832	5.92895	7.20851	8.65537	10.8783	14.3748	17.5712	21.1726	24.8168	31.5886	40.2378	53.7531	88.9791
0.246094	0.442301	0.55465	0.778217	0.984375	1.10056	1.31925	1.50305	1.79159	2.17898	2.46094	2.74182	3.09645	3.58831	4.12339	4.98003	5.93504	7.23783	8.67518	10.8978	14.3901	17.597	21.1998	24.8299	31.5925	40.2429	54.1518	89.2589
0.246094	0.442589	0.554932	0.778217	0.984375	1.10302	1.32526	1.50379	1.79159	2.18199	2.46155	2.74249	3.10984	3.59034	4.13987	5.00162	5.94176	7.26333	8.70073	10.9014	14.4212	17.5997	21.2169	24.8896	31.6735	40.2903	54.3639	89.2832
0.246094	0.442743	0.555784	0.778217	0.984375	1.10635	1.32526	1.51097	1.79159	2.18276	2.46156	2.74255	3.11287	3.60185	4.15771	5.01644	5.9573	7.26706	8.72158	10.9283	14.4458	17.6023	21.2298	24.8993	31.7012	40.3033	54.4068	89.2996
0.246094	0.443307	0.558083	0.778217	0.984375	1.1093	1.32526	1.52415	1.79652	2.1829	2.46588	2.74799	3.11821	3.60737	4.16369	5.01935	5.99277	7.26706	8.8217	10.9311	14.467	17.6176	21.2412	24.9151	31.7621	40.3802	54.8546	89.3141
0.246094	0.44331	0.559226	0.778217	0.984375	1.11123	1.32526	1.52525	1.79712	2.20113	2.46723	2.74941	3.12234	3.6137	4.16878	5.04942	5.99277	7.30447	8.8217	10.9411	14.5216	17.6176	21.303	24.9333	31.7645	40.486	54.9423	89.7647
0.246094	0.443391	0.559598	0.778217	0.984375	1.12109	1.32526	1.52625	1.80581	2.20113	2.47231	2.74944	3.12367	3.61962	4.1713	5.05234	5.99277	7.30861	8.8459	10.9506	14.5556	17.6434	21.3206	24.9818	31.7957	40.5009	55.0581	89.9076
0.246094	0.443523	0.563838	0.778217	0.984375	1.12456	1.32526	1.52932	1.80618	2.20113	2.47321	2.75141	3.13465	3.6224	4.17949	5.07335	6.03306	7.31689	8.87304	10.9643	14.5695	17.6451	21.3237	25.054	31.8185	40.6122	55.0697	90.0731
0.246094	0.44373	0.564097	0.778217	0.984375	1.12475	1.32526	1.53191	1.80815	2.20113	2.47321	2.75141	3.13498	3.6253	4.18438	5.07335	6.05311	7.31689	8.87304	10.9851	14.5757	17.6496	21.3643	25.0563	31.8468	40.6152	55.3229	90.0733
0.246094	0.444142	0.565031	0.778217	0.984375	1.12742	1.32526	1.53329	1.80893	2.20113	2.47321	2.75141	3.15154	3.62895	4.19083	5.07958	6.05311	7.3373	8.88215	10.9907	14.5757	17.6787	21.3691	25.0678	31.8489	40.6181	55.3459	90.4615
0.246094	0.444423	0.565801	0.778217	0.984375	1.13599	1.32526	1.53892	1.81675	2.20381	2.47321	2.75141	3.15154	3.63353	4.19083	5.08642	6.06144	7.36323	8.91045	11.0008	14.5777	17.7243	21.4455	25.0823	31.8765	40.791	55.3762	90.523
0.246094	0.446484	0.565843	0.778217	0.984375	1.13674	1.32526	1.53941	1.81845	2.2061	2.47321	2.75141	3.16236	3.63422	4.19083	5.11617	6.07807	7.38281	8.91899	11.077	14.5778	17.7341	21.461	25.151	31.883	40.8582	55.441	90.6494
0.246094	0.446737	0.567023	0.778217	0.984375	1.14325	1.32526	1.5402	1.82273	2.21017	2.47321	2.75141	3.16365	3.64177	4.19275	5.12738	6.07807	7.38691	8.9478	11.0852	14.5944	17.7352	21.4772	25.151	31.9164	40.8731	55.4542	90.6791
0.246094	0.447426	0.567519	0.778217	0.984397	1.14934	1.32526	1.54188	1.82337	2.21484	2.47583	2.75141	3.19153	3.65845	4.19484	5.13859	6.08802	7.40329	8.95795	11.0988	14.5973	17.7682	21.5253	25.2183	31.9884	41.0613	55.4765	91.0806
0.246094	0.447466	0.572781	0.778217	0.988734	1.15339	1.32667	1.54362	1.82383	2.21484	2.47697	2.75141	3.19922	3.65845	4.20142	5.14422	6.09299	7.40598	8.98158	11.1225	14.6338	17.8506	21.568	25.2454	31.9922	41.2124	55.4869	91.4231
0.246094	0.447865	0.574599	0.778217	0.989547	1.15344	1.32692	1.5476	1.83712	2.21973	2.48969	2.75141	3.19922	3.65966	4.20525	5.15673	6.11284	7.45387	9.01187	11.1345	14.6338	17.8563	21.5785	25.387	32.0007	41.2528	55.603	91.9541
0.246094	0.448068	0.57563	0.778217	0.992188	1.15722	1.33577	1.54763	1.83714	2.22346	2.49022	2.75141	3.19922	3.66606	4.20525	5.16797	6.15709	7.46058	9.02691	11.1631	14.7184	17.8719	21.5905	25.4221	32.0581	41.2983	55.8324	92.3721
0.246094	0.449182	0.576202	0.778217	0.992188	1.15759	1.33577	1.55028	1.83926	2.22847	2.49122	2.76002	3.19922	3.67052	4.21245	5.17382	6.15726	7.46998	9.02866	11.1722	14.7211	17.8956	21.6031	25.4247	32.1772	41.3572	56.0764	92.4196
0.246094	0.451045	0.577806	0.778217	0.993774	1.16044	1.33577	1.55643	1.84169	2.22847	2.49757	2.76136	3.19979	3.6719	4.22161	5.17382	6.16709	7.4731	9.02866	11.2822	14.7266	17.9446	21.6115	25.4894	32.187	41.3621	56.1056	92.5873
0.246094	0.451111	0.577841	0.778217	0.995848	1.16136	1.33957	1.55643	1.84627	2.22847	2.50122	2.76305	3.20867	3.67623	4.23396	5.17382	6.172	7.47877	9.04876	11.2908	14.7513	17.9632	21.6135	25.4954	32.283	41.3746	56.2151	92.7766
0.246094	0.452422	0.578576	0.778217	0.995939	1.16198	1.34051	1.55643	1.84798	2.22887	2.50663	2.76598	3.20867	3.69141	4.24588	5.17382	6.17322	7.50081	9.09083	11.379	14.8188	17.9665	21.619	25.5191	32.3027	41.3845	56.2183	92.8374
0.246094	0.452523	0.579918	0.778217	1.00082	1.16246	1.34267	1.55643	1.85088	2.23218	2.50967	2.76796	3.20867	3.6996	4.25349	5.19056	6.18887	7.5491	9.10547	11.4003	14.8658	18.0065	21.6367	25.5405	32.3733	41.3978	56.3619	93.0797
0.246094	0.452855	0.580503	0.778217	1.00397	1.16265	1.34693	1.55643	1.85154	2.23315	2.50967	2.77666	3.20931	3.71614	4.29784	5.19135	6.19648	7.60368	9.10879	11.4044	14.9308	18.0254	21.6367	25.5476	32.3882	41.433	56.3818	93.9746
0.246094	0.45466	0.580986	0.778217	1.0045	1.16355	1.34746	1.55643	1.86562	2.2347	2.50967	2.78655	3.22653	3.72046	4.29784	5.20448	6.20029	7.6408	9.13203	11.4401	14.9632	18.0308	21.6395	25.5807	32.4304	41.4627	56.4816	94.1128
0.246094	0.455103	0.581445	0.778217	1.00486	1.16458	1.35066	1.55643	1.86684	2.24118	2.52502	2.79584	3.22654	3.73345	4.29784	5.21463	6.21113	7.65664	9.13535	11.4612	14.9671	18.0992	21.6405	25.5807	32.498	41.4773	56.5683	94.197
0.246094	0.455381	0.582134	0.778217	1.00487	1.16502	1.35323	1.55643	1.86903	2.24997	2.52913	2.79839	3.23414	3.74839	4.30418	5.21489	6.21604	7.67901	9.16676	11.4718	14.9713	18.0992	21.6479	25.5864	32.5055	41.4871	56.6299	94.2423
0.246094	0.45631	0.582296	0.778217	1.0088	1.16529	1.3541	1.55675	1.86916	2.25024	2.52959	2.79969	3.2349	3.74839	4.31609	5.21489	6.22573	7.67931	9.18823	11.5218	14.9814	18.1783	21.6565	25.6135	32.524	41.5222	56.647	95.1583
0.246094	0.45647	0.583779	0.778217	1.01001	1.16604	1.36101	1.56108	1.87177	2.25532	2.53223	2.80087	3.23686	3.75363	4.32418	5.21852	6.22573	7.68524	9.19143	11.5899	14.9875	18.2059	21.6591	25.6233	32.5533	41.6013	56.7042	95.2609
0.246094	0.458087	0.584607	0.778217	1.01119	1.16705	1.36521	1.56517	1.87419	2.26887	2.53369	2.80304	3.23686	3.75646	4.33849	5.22044	6.2306	7.69215	9.19482	11.5978	14.9875	18.2173	21.6698	25.6634	32.5598	41.6364	56.7757	95.4321
0.246094	0.459712	0.584645	0.778217	1.01218	1.16797	1.36852	1.56871	1.87419	2.26887	2.53369	2.8059	3.24055	3.75646	4.34066	5.22044	6.2393	7.69222	9.20107	11.6082	15.0137	18.2699	21.6704	25.6814	32.5648	41.7127	56.7944	95.9725
0.246094	0.460295	0.585832	0.778217	1.01368	1.17759	1.37572	1.57577	1.87419	2.26887	2.53812	2.8059	3.24822	3.76379	4.34393	5.22123	6.24566	7.69799	9.20451	11.634	15.0299	18.2732	21.6912	25.7636	32.5933	41.7873	57.2559	96.1411
0.246094	0.460771	0.58613	0.778217	1.01467	1.17779	1.37579	1.57577	1.87419	2.26887	2.54291	2.80738	3.24842	3.76451	4.35276	5.26187	6.27418	7.70395	9.25064	11.6681	15.1082	18.2928	21.7247	25.8359	32.6081	41.8808	57.4474	96.2538
0.246094	0.461341	0.586132	0.778217	1.01467	1.17808	1.37696	1.57577	1.87419	2.26887	2.55278	2.81763	3.25147	3.76451	4.35384	5.26664	6.27418	7.70788	9.26372	11.6983	15.1802	18.2971	21.7302	25.841	32.6287	42.018	57.4812	96.2926
0.246094	0.462267	0.587292	0.778854	1.01467	1.17825	1.37992	1.57577	1.87687	2.26887	2.55755	2.82896	3.26142	3.76451	4.38157	5.26664	6.27418	7.70788	9.26372	11.7721	15.1802	18.31	21.7525	25.8773	32.6944	42.0525	57.6353	96.589
0.246094	0.462607	0.588303	0.778987	1.01467	1.17995	1.38552	1.57577	1.87792	2.26887	2.55772	2.83025	3.27389	3.76451	4.38404	5.27876	6.27418	7.72358	9.28653	11.7766	15.1916	18.3104	21.7692	26.0592	32.7453	42.0715	57.6898	96.6196
0.246094	0.463828	0.589499	0.780521	1.01467	1.1801	1.3891	1.57577	1.88133	2.26887	2.55958	2.8461	3.27417	3.76955	4.39501	5.30102	6.2748	7.77049	9.28658	11.8227	15.2121	18.3765	21.7901	26.0732	32.7891	42.1006	57.9236	96.7148
0.246094	0.467237	0.590356	0.780596	1.01467	1.18215	1.39212	1.57577	1.88314	2.26887	2.55963	2.85202	3.28175	3.77465	4.40226	5.30102	6.28865	7.77887	9.33724	11.8227	15.2201	18.4061	21.8305	26.0744	32.797	42.133	58.1516	97.1799
0.246094	0.467416	0.590741	0.782196	1.01467	1.18912	1.39223	1.57577	1.88379	2.26887	2.56014	2.86128	3.2833	3.78496	4.43652	5.32873	6.30227	7.78217	9.3386	11.8403	15.2604	18.411	21.8567	26.0906	32.8192	42.1388	58.457	97.5578
0.246094	0.467931	0.593646	0.782853	1.01467	1.18912	1.39708	1.57577	1.88792	2.26887	2.56045	2.86258	3.28467	3.80529	4.47397	5.355	6.30308	7.80295	9.34544	11.879	15.2643	18.4587	21.8622	26.1231	32.9174	42.1396	58.5227	97.7748
0.246094	0.46871	0.594714	0.783531	1.01467	1.19384	1.40317	1.57577	1.88961	2.2696	2.56789	2.8665	3.29511	3.8204	4.50342	5.37477	6.30788	7.81711	9.3548	11.8866	15.3073	18.4642	21.8878	26.2041	32.9452	42.1588	58.5227	98.2296
0.246094	0.47111	0.594771	0.784393	1.01467	1.19407	1.41068	1.57581	1.90806	2.27065	2.56929	2.86992	3.30169	3.82832	4.50513	5.37477	6.32398	7.82098	9.3548	11.907	15.3395	18.4718	21.8961	26.2367	33.0203	42.2084	58.532	98.3666
0.246094	0.47155	0.594948	0.784393	1.01467	1.19517	1.41092	1.58052	1.92205	2.27763	2.56929	2.86992	3.30183	3.83139	4.52643	5.37477	6.32705	7.82098	9.35871	11.907	15.3413	18.5903	21.9148	26.2664	33.0215	42.2494	58.577	98.3741
0.246094	0.471636	0.595295	0.784393	1.01467	1.19593	1.42368	1.58082	1.92205	2.2828	2.56929	2.86992	3.30459	3.8366	4.52807	5.38302	6.34179	7.83038	9.37097	11.9855	15.3548	18.5958	21.9628	26.2676	33.0624	42.2709	58.6803	98.4575
0.246094	0.472815	0.59551	0.785213	1.01467	1.19911	1.42655	1.58418	1.92205	2.29097	2.58709	2.87065	3.30607	3.84411	4.52993	5.39726	6.38121	7.83259	9.37097	11.9855	15.3616	18.603	21.9774	26.2709	33.0683	42.45	58.6881	99.382
0.246094	0.472986	0.598026	0.786346	1.01467	1.20215	1.42816	1.58443	1.92205	2.29766	2.59884	2.88045	3.30687	3.84699	4.53774	5.40296	6.38422	7.84804	9.43217	12.0007	15.4168	18.6269	21.9906	26.2745	33.0742	42.4603	58.7979	99.4324
0.246094	0.473269	0.598984	0.786687	1.01467	1.20587	1.42847	1.58638	1.92205	2.3049	2.615	2.88045	3.31085	3.85601	4.53774	5.41406	6.38897	7.86346	9.44993	12.0007	15.455	18.6712	21.9932	26.2768	33.1277	42.4821	58.9172	99.6148
0.246094	0.473805	0.600245	0.790501	1.01467	1.20725	1.43249	1.59094	1.92205	2.30532	2.61601	2.88565	3.32577	3.86283	4.57761	5.41743	6.39844	7.86346	9.45461	12.0007	15.4961	18.7177	22.0263	26.3018	33.217	42.5059	59.0076	100.026
0.246094	0.474795	0.602765	0.792342	1.01467	1.20983	1.43496	1.5957	1.92205	2.30716	2.61601	2.89484	3.33788	3.87197	4.57914	5.41865	6.41734	7.86351	9.46742	12.0083	15.5117	18.7322	22.0268	26.3332	33.2355	42.5998	59.3336	100.082
0.246094	0.475179	0.603263	0.794981	1.01467	1.21075	1.43496	1.59709	1.92205	2.30855	2.61601	2.89676	3.34716	3.88869	4.59741	5.41965	6.42475	7.87486	9.4938	12.0421	15.5371	18.7613	22.0316	26.3474	33.2591	42.6197	59.3841	100.293
0.246094	0.476377	0.606114	0.795338	1.01467	1.21166	1.43496	1.5973	1.92205	2.31348	2.61615	2.89742	3.34724	3.89108	4.59741	5.41965	6.44922	7.875	9.49616	12.1137	15.541	18.7747	22.0889	26.3493	33.2796	42.6235	59.4636	100.469
0.246094	0.476542	0.606584	0.797151	1.01467	1.21825	1.43496	1.59863	1.92205	2.31665	2.61711	2.90265	3.34724	3.90736	4.61012	5.43464	6.45295	7.87884	9.49935	12.2207	15.541	18.7823	22.1005	26.4147	33.2836	42.6282	59.4804	100.823
0.246094	0.476664	0.610836	0.797414	1.01467	1.21848	1.43496	1.60194	1.92437	2.32164	2.61987	2.90331	3.35039	3.90834	4.6166	5.43639	6.45379	7.87884	9.53466	12.248	15.5423	18.8016	22.1019	26.5382	33.2908	42.6452	59.5279	101.568
0.246094	0.479353	0.610909	0.799761	1.01467	1.22137	1.43496	1.63128	1.94269	2.32164	2.62605	2.90415	3.35649	3.91169	4.64021	5.43639	6.45967	7.8794	9.54758	12.2603	15.5793	18.8659	22.1019	26.5382	33.3137	42.6764	59.5577	101.835
0.246094	0.481218	0.611568	0.8027	1.01467	1.22703	1.43496	1.63787	1.94274	2.32164	2.62892	2.91066	3.36548	3.92009	4.64329	5.44752	6.45967	7.89264	9.55655	12.3566	15.6191	18.8911	22.1334	26.553	33.3763	42.6765	59.7608	102.534
0.246094	0.482759	0.611771	0.803062	1.01467	1.22783	1.43496	1.64336	1.94581	2.32201	2.64152	2.91406	3.37294	3.93199	4.66038	5.46417	6.45967	7.92292	9.57037	12.3587	15.6284	18.9139	22.1457	26.5607	33.3863	42.821	59.8959	103.037
0.246094	0.486027	0.613647	0.805155	1.01467	1.22865	1.43496	1.65029	1.95196	2.32326	2.64558	2.91562	3.37436	3.94518	4.66726	5.46417	6.4751	7.92483	9.57555	12.3855	15.6284	18.9252	22.1498	26.5622	33.3894	42.8698	59.9016	103.581
0.246094	0.486197	0.61485	0.805562	1.01467	1.22918	1.43496	1.65085	1.95999	2.32441	2.64956	2.9226	3.37525	3.94518	4.6693	5.46417	6.48287	7.93628	9.61027	12.4275	15.6426	18.9348	22.1751	26.592	33.3906	42.9281	60.0857	103.648
0.246094	0.490093	0.615628	0.808474	1.01467	1.23047	1.43496	1.65085	1.96875	2.32621	2.65051	2.93271	3.37786	3.94518	4.6693	5.47378	6.48841	7.93628	9.62601	12.4515	15.6492	18.9487	22.1826	26.6191	33.4658	42.9722	60.1436	103.712
0.246094	0.491222	0.618507	0.810851	1.01467	1.23047	1.43496	1.65085	1.96875	2.33181	2.65051	2.93411	3.38309	3.94924	4.6693	5.47953	6.49706	7.93628	9.648	12.4515	15.6801	18.9606	22.2099	26.6244	33.5501	42.9954	60.1924	103.804
0.246094	0.491685	0.619862	0.811531	1.01467	1.23047	1.43496	1.65085	1.96875	2.33209	2.65051	2.9344	3.38599	3.94934	4.6693	5.48148	6.5027	7.97055	9.65114	12.4758	15.6961	18.9622	22.2332	26.641	33.5889	42.9981	60.2182	103.91
0.246094	0.492188	0.624028	0.816018	1.01467	1.23047	1.43496	1.65085	1.96875	2.33465	2.65051	2.93544	3.40872	3.94998	4.67578	5.48756	6.51568	7.98573	9.67999	12.4952	15.7519	18.9824	22.2358	26.6441	33.6294	43.0247	60.2466	104.346
0.246094	0.492188	0.624359	0.817128	1.01571	1.23047	1.43496	1.65085	1.96875	2.34249	2.65051	2.94996	3.41007	3.95841	4.67699	5.49075	6.52707	7.99294	9.69497	12.5484	15.7577	18.9841	22.2535	26.702	33.6892	43.0727	60.2642	104.399
0.246094	0.492188	0.627127	0.81854	1.0159	1.23047	1.43496	1.65091	1.97156	2.34791	2.65051	2.95312	3.41884	3.96814	4.68225	5.4951	6.55341	8.01223	9.69497	12.6685	15.7827	18.9926	22.2773	26.7711	33.7234	43.1349	60.2726	104.634
0.246094	0.492188	0.6278	0.819935	1.01698	1.23047	1.43641	1.65734	1.98014	2.35055	2.66191	2.96336	3.41884	3.96814	4.68458	5.50282	6.60339	8.01223	9.72458	12.7043	15.7846	19.035	22.301	26.7769	33.7404	43.1696	60.3472	105.052
0.246094	0.492188	0.627965	0.823596	1.01764	1.23047	1.43654	1.661	1.98407	2.35371	2.66191	2.96336	3.41884	3.96814	4.69636	5.50282	6.60886	8.03488	9.75103	12.7613	15.8191	19.0568	22.3056	26.8193	33.7723	43.2243	60.3592	105.067
0.246094	0.492188	0.628199	0.827666	1.01931	1.23047	1.44276	1.67934	1.98407	2.35605	2.66191	2.96336	3.42202	3.96814	4.70161	5.53027	6.62628	8.03488	9.84233	12.7637	15.832	19.0782	22.3133	26.8315	33.7744	43.2544	60.4059	105.225
0.246094	0.492188	0.632637	0.828232	1.01996	1.23047	1.44339	1.68308	1.98407	2.3674	2.66994	2.98233	3.42769	3.96814	4.72322	5.53027	6.62628	8.04617	9.88366	12.7816	15.8497	19.0782	22.3133	26.8344	33.7836	43.2572	60.4337	105.261
0.246094	0.492188	0.632638	0.82983	1.02453	1.23047	1.44635	1.68515	1.98407	2.36888	2.67018	2.98561	3.42769	3.97577	4.72719	5.53027	6.62628	8.06121	9.88366	12.7992	15.8497	19.0782	22.3417	26.8432	33.9038	43.288	60.466	105.335
0.246094	0.492188	0.63558	0.829852	1.02794	1.23047	1.44657	1.69205	1.98407	2.37153	2.67042	2.99386	3.42769	3.97577	4.72731	5.53027	6.68837	8.10761	9.88366	12.7992	15.8636	19.0805	22.3444	26.8682	33.9629	43.4298	60.5155	105.467
0.246094	0.492188	0.637148	0.83535	1.02856	1.23047	1.44918	1.69389	1.98407	2.37966	2.67961	2.99386	3.42804	3.97875	4.72731	5.53569	6.69447	8.11353	9.88631	12.8347	15.9677	19.0967	22.3842	26.8964	34.0188	43.4383	60.5581	105.802
0.246094	0.492188	0.637894	0.83613	1.03071	1.23047	1.45099	1.6947	1.98407	2.38311	2.68368	2.99386	3.42891	3.97979	4.73371	5.5359	6.71166	8.11736	9.93786	12.8559	15.9961	19.1969	22.3945	26.9195	34.0323	43.4639	60.627	105.847
0.246094	0.492188	0.638065	0.836376	1.03516	1.23047	1.45402	1.70089	1.98764	2.39588	2.68908	3.00154	3.44157	3.99098	4.73371	5.5465	6.71705	8.11736	9.96604	12.8704	15.9961	19.2536	22.4307	26.9256	34.0957	43.4774	60.642	106.154
0.246094	0.492188	0.638463	0.836429	1.04194	1.23047	1.45476	1.70229	1.99138	2.41527	2.69283	3.00583	3.4614	4.01477	4.73893	5.55213	6.71705	8.11736	9.96604	12.8959	15.9961	19.2536	22.5132	26.9396	34.1102	43.5236	60.6874	106.679
0.246094	0.492188	0.643473	0.840269	1.0439	1.23047	1.45828	1.70251	1.99471	2.42374	2.70042	3.01399	3.46197	4.02516	4.74905	5.56218	6.72156	8.11736	9.96772	12.9517	16.0131	19.2677	22.5132	26.9613	34.1116	43.6672	60.7268	107.324
0.246094	0.492188	0.64421	0.840287	1.04409	1.23047	1.45981	1.71014	2.00608	2.42374	2.70703	3.01978	3.47048	4.02596	4.75286	5.57416	6.73854	8.12482	9.98884	12.9521	16.0245	19.2856	22.5575	26.9638	34.124	43.6926	60.7883	107.632
0.246094	0.492188	0.645911	0.84159	1.04409	1.23047	1.46711	1.7132	2.0085	2.42374	2.70804	3.02711	3.47968	4.03624	4.75766	5.58302	6.7575	8.12482	10.0206	12.9999	16.0264	19.2913	22.5683	26.9807	34.1787	43.8026	61.0923	107.901
0.246094	0.492188	0.647972	0.843785	1.04409	1.23047	1.47212	1.72099	2.01267	2.42374	2.70968	3.02723	3.49765	4.03781	4.77828	5.6118	6.77093	8.13198	10.0538	13.0314	16.0312	19.3054	22.5817	27.0742	34.1809	43.8088	61.0947	109.293
0.246094	0.492188	0.648027	0.845413	1.04409	1.23047	1.47414	1.72266	2.01806	2.42374	2.71819	3.02903	3.50532	4.05257	4.77828	5.6118	6.7888	8.13719	10.0538	13.043	16.032	19.3305	22.5985	27.0748	34.1893	43.8321	61.1839	109.343
0.246094	0.492188	0.648911	0.848714	1.04409	1.23047	1.47535	1.72266	2.02019	2.42374	2.71819	3.03586	3.50684	4.05868	4.7899	5.6118	6.79862	8.14156	10.06	13.0471	16.0433	19.3382	22.6219	27.1119	34.2138	43.8827	61.2991	109.647
0.246094	0.492188	0.651895	0.849298	1.04409	1.23047	1.4757	1.72266	2.02299	2.42556	2.71819	3.03955	3.50977	4.06205	4.80221	5.619	6.80662	8.14576	10.077	13.0638	16.1036	19.3712	22.6219	27.1741	34.2636	43.962	61.4988	110.184
0.246094	0.492188	0.6521	0.850413	1.04409	1.23047	1.47656	1.72266	2.02639	2.4262	2.72428	3.04133	3.52353	4.07301	4.80988	5.62745	6.81206	8.15087	10.0928	13.0824	16.134	19.379	22.6219	27.1775	34.2769	44.0226	61.5884	110.315
0.246094	0.492188	0.657397	0.851706	1.04409	1.23047	1.47656	1.72266	2.02934	2.42807	2.73074	3.04401	3.52353	4.07358	4.83402	5.6596	6.82439	8.18054	10.1018	13.1504	16.151	19.4149	22.658	27.1775	34.2963	44.0531	61.6093	110.871
0.246094	0.492188	0.661441	0.857621	1.04409	1.23047	1.47656	1.72584	2.02934	2.43089	2.73143	3.04401	3.52353	4.07358	4.83498	5.6655	6.84211	8.18054	10.1467	13.1539	16.1859	19.415	22.6847	27.2005	34.3202	44.0535	61.659	111.105
0.246094	0.492188	0.662763	0.862305	1.04409	1.23047	1.47656	1.73054	2.02934	2.43537	2.73286	3.05646	3.52353	4.07358	4.83901	5.6655	6.84865	8.21378	10.1467	13.1907	16.2235	19.4414	22.6947	27.2332	34.3221	44.0838	61.6733	111.923
0.246094	0.492188	0.664354	0.862382	1.04409	1.23047	1.47656	1.7332	2.02934	2.44294	2.73418	3.06434	3.52353	4.08493	4.84086	5.68152	6.85538	8.21378	10.1486	13.21	16.2347	19.558	22.7167	27.2376	34.3329	44.1674	61.7386	113.698
0.246094	0.492188	0.66529	0.86334	1.04409	1.23047	1.47656	1.73472	2.02934	2.44298	2.73809	3.07326	3.54427	4.09582	4.85373	5.68152	6.86421	8.22483	10.2079	13.2543	16.2496	19.5643	22.782	27.2376	34.3653	44.1826	61.7436	114.643
0.246094	0.492188	0.665649	0.864909	1.05237	1.23047	1.47656	1.73537	2.02934	2.45647	2.74001	3.07509	3.54921	4.09582	4.88315	5.68152	6.86421	8.24815	10.2092	13.268	16.2515	19.6397	22.7966	27.3794	34.4004	44.2346	61.7813	115.336
0.246094	0.492188	0.665725	0.865721	1.05237	1.23211	1.48345	1.7382	2.02934	2.46094	2.74202	3.07528	3.54921	4.09692	4.88744	5.7081	6.86421	8.25057	10.2092	13.2891	16.259	19.6637	22.8217	27.427	34.542	44.2593	61.9903	115.723
0.246094	0.492188	0.671558	0.867219	1.05237	1.24023	1.48828	1.7393	2.03306	2.46094	2.75141	3.08355	3.54921	4.10059	4.90338	5.72399	6.87412	8.25424	10.2358	13.3114	16.259	19.6706	22.8284	27.4436	34.5672	44.2695	62.0649	116.603
0.246094	0.492188	0.671974	0.867754	1.05476	1.24023	1.49391	1.74015	2.03586	2.46094	2.75141	3.08355	3.54921	4.10108	4.90338	5.72628	6.89062	8.26351	10.2447	13.3187	16.259	19.6902	22.8801	27.4571	34.6199	44.2868	62.0747	117.328
0.246094	0.492188	0.672367	0.8694	1.05495	1.24466	1.49693	1.74015	2.03826	2.46094	2.75141	3.08566	3.55628	4.11089	4.91882	5.72661	6.89502	8.27089	10.2772	13.3719	16.3925	19.7085	22.8801	27.5012	34.6229	44.3549	62.1035	117.843
0.246094	0.492188	0.67423	0.86997	1.05698	1.24704	1.49693	1.74015	2.04073	2.46094	2.75141	3.08789	3.56355	4.11842	4.92188	5.72974	6.89502	8.27256	10.2831	13.3935	16.422	19.7334	22.9013	27.5196	34.6293	44.4123	62.1779	118.439
0.246094	0.492188	0.674508	0.871022	1.05715	1.24817	1.49693	1.74015	2.04087	2.46094	2.75141	3.10167	3.57187	4.12099	4.92188	5.73984	6.90524	8.27256	10.3326	13.4273	16.4276	19.7566	22.9254	27.5327	34.7027	44.5865	62.2592	118.806
0.246094	0.492188	0.674731	0.871277	1.06186	1.25484	1.49693	1.74015	2.04455	2.46094	2.75141	3.11137	3.57738	4.12464	4.92802	5.74512	6.93443	8.28631	10.3363	13.4476	16.4366	19.7627	22.9298	27.5919	34.7152	44.6218	62.4304	119.203
0.246094	0.492188	0.67554	0.874129	1.0626	1.25484	1.49693	1.74015	2.05009	2.46094	2.75141	3.11287	3.57741	4.12528	4.92802	5.75404	6.93443	8.3205	10.342	13.4779	16.4497	19.8021	22.9871	27.6236	34.716	44.6489	62.4633	119.606
0.246094	0.492188	0.676711	0.876709	1.06713	1.25484	1.49693	1.74015	2.05264	2.47321	2.75141	3.11287	3.58307	4.14304	4.92802	5.76091	6.95644	8.35995	10.3435	13.5232	16.459	19.8296	23.0239	27.6447	34.7572	44.6577	62.4928	120.832
0.246094	0.492188	0.67684	0.877628	1.06896	1.25484	1.49693	1.74015	2.05456	2.47321	2.75141	3.11287	3.58318	4.14494	4.9423	5.76091	6.96928	8.36719	10.3436	13.5441	16.4611	19.8763	23.0357	27.6875	34.7734	44.7119	62.534	120.943
0.246094	0.492188	0.6772	0.879567	1.07138	1.25484	1.49693	1.74015	2.05983	2.47321	2.75141	3.1146	3.58583	4.15275	4.94642	5.76616	6.99963	8.36768	10.3462	13.553	16.4932	19.9224	23.0646	27.6951	34.7892	44.7119	62.5543	121.212
0.246094	0.492188	0.678533	0.880732	1.07238	1.25484	1.49693	1.74015	2.06974	2.47872	2.75212	3.12123	3.58726	4.16146	4.94642	5.77415	7.01754	8.40486	10.3506	13.554	16.505	19.9351	23.0735	27.7308	34.7977	44.7498	62.6306	121.316
0.246094	0.492188	0.679661	0.881407	1.07558	1.25484	1.49693	1.74738	2.07686	2.48402	2.75319	3.1323	3.59315	4.17523	4.95254	5.78201	7.03966	8.42489	10.374	13.5617	16.5341	19.9835	23.0765	27.888	34.9427	44.7897	62.6578	121.574
0.246094	0.492188	0.680144	0.883192	1.07706	1.25484	1.49693	1.74928	2.08817	2.4867	2.7557	3.13774	3.59358	4.18359	4.95554	5.78395	7.04705	8.47506	10.374	13.562	16.5379	20.0653	23.0923	27.8967	34.9877	44.8418	62.6994	123.503
0.246094	0.492188	0.682589	0.886324	1.07889	1.25484	1.49693	1.75794	2.08901	2.48749	2.76314	3.14072	3.63353	4.18444	4.95924	5.79236	7.05135	8.48577	10.3856	13.5709	16.578	20.0668	23.1289	27.9048	35.0203	44.8863	62.7539	124.007
0.246094	0.492188	0.683206	0.887304	1.08147	1.25484	1.49693	1.75803	2.10263	2.50967	2.76732	3.14765	3.63353	4.19083	4.97694	5.79236	7.06221	8.48577	10.4167	13.5731	16.591	20.0729	23.138	27.9145	35.0624	44.9079	62.7541	124.7
0.246094	0.492188	0.685115	0.887304	1.08243	1.25484	1.49693	1.76749	2.10263	2.50967	2.76854	3.15154	3.63353	4.19083	4.97694	5.8122	7.06297	8.48577	10.4328	13.5731	16.6012	20.0834	23.1446	27.9563	35.1444	44.9314	62.9577	126.595
0.246094	0.492188	0.688462	0.887304	1.08356	1.25484	1.49894	1.76843	2.10263	2.50967	2.76975	3.17002	3.63353	4.20401	4.97811	5.8232	7.08101	8.54268	10.4698	13.5915	16.6042	20.1518	23.1446	27.9623	35.1611	44.9336	63.0108	126.71
0.246094	0.492188	0.689356	0.887304	1.08512	1.25484	1.50433	1.76984	2.10587	2.51429	2.77119	3.17018	3.63896	4.20525	4.98302	5.83403	7.087	8.59569	10.5131	13.6132	16.6054	20.1769	23.1825	27.965	35.3254	44.9517	63.0124	127.459
0.246094	0.492188	0.691266	0.887304	1.08544	1.25484	1.50717	1.77058	2.11119	2.51952	2.77697	3.17297	3.64034	4.20525	4.99061	5.8597	7.08964	8.6035	10.5559	13.6244	16.6103	20.1857	23.1825	27.9985	35.3768	44.9658	63.1587	127.859
0.246094	0.492188	0.691402	0.887304	1.09014	1.25484	1.51412	1.77461	2.11698	2.52002	2.78412	3.18322	3.64442	4.21245	4.99185	5.8702	7.09843	8.61328	10.5677	13.625	16.6845	20.1879	23.1825	28.0019	35.3908	45.1392	63.3045	128.184
0.246094	0.492188	0.691497	0.887304	1.09486	1.25484	1.52055	1.77461	2.11698	2.53369	2.78423	3.19465	3.64587	4.23938	5.01027	5.87025	7.10269	8.65537	10.5935	13.6316	16.7115	20.1932	23.2164	28.0169	35.3973	45.1675	63.4022	128.998
0.246094	0.492188	0.693704	0.887304	1.10056	1.25484	1.52114	1.77461	2.13081	2.53369	2.78861	3.19922	3.65845	4.24824	5.01761	5.87025	7.10269	8.65537	10.602	13.6687	16.7362	20.1977	23.217	28.0266	35.4103	45.179	63.4347	129.044
0.246094	0.492188	0.696058	0.887304	1.10056	1.25484	1.5254	1.77461	2.13526	2.53369	2.7965	3.19922	3.65845	4.26669	5.03288	5.87685	7.10269	8.72853	10.6078	13.6988	16.7507	20.1992	23.223	28.071	35.444	45.1828	63.6282	129.67
0.246094	0.492188	0.696058	0.887304	1.10056	1.25484	1.52631	1.78044	2.13687	2.53914	2.80471	3.19922	3.65845	4.28874	5.05541	5.9165	7.13672	8.73893	10.676	13.7483	16.7855	20.2037	23.2482	28.0946	35.499	45.215	63.7364	130.537
0.246094	0.492188	0.696058	0.887304	1.10056	1.25484	1.52825	1.79159	2.14961	2.5403	2.8059	3.20759	3.67149	4.29784	5.07335	5.9165	7.13672	8.75337	10.676	13.7571	16.7994	20.2181	23.2702	28.0987	35.562	45.2337	63.7459	130.695
0.246094	0.492188	0.696058	0.887304	1.10056	1.25484	1.53281	1.79159	2.15555	2.5413	2.8059	3.20817	3.68152	4.30488	5.07335	5.9165	7.14968	8.77059	10.676	13.7571	16.8983	20.2291	23.279	28.1265	35.5887	45.306	63.8541	130.719
0.246094	0.492188	0.696058	0.887304	1.10056	1.25484	1.53434	1.79159	2.16171	2.54189	2.8059	3.20867	3.6961	4.31445	5.07335	5.9165	7.15367	8.80056	10.676	13.7647	16.9233	20.2336	23.2907	28.3264	35.6167	45.322	63.8899	131.6
0.246094	0.492188	0.696058	0.887304	1.10056	1.25484	1.53819	1.79159	2.17021	2.55105	2.8059	3.20867	3.69642	4.31929	5.10363	5.92672	7.15367	8.80452	10.6775	13.7792	16.9519	20.2531	23.3374	28.3581	35.659	45.3774	63.9464	131.916
0.246094	0.492188	0.696058	0.887304	1.10056	1.25484	1.54405	1.79159	2.17111	2.55188	2.8059	3.20867	3.69822	4.33367	5.11362	5.92672	7.16636	8.81139	10.7133	13.8425	16.9597	20.2542	23.3789	28.3649	35.6997	45.3809	63.9924	133.384
0.246094	0.492188	0.696058	0.887304	1.10056	1.25484	1.54491	1.79159	2.17179	2.55519	2.8059	3.20867	3.6996	4.35375	5.12088	5.92925	7.16636	8.82163	10.7213	13.8682	16.9715	20.3322	23.3789	28.4076	35.7446	45.4333	64.3079	135.953
0.246094	0.492188	0.696058	0.887304	1.10056	1.25484	1.54512	1.79159	2.17221	2.55575	2.8059	3.20867	3.70223	4.36079	5.12088	5.94073	7.16636	8.8217	10.727	13.9081	17.057	20.4047	23.3841	28.5111	35.7913	45.462	64.4698	138.198
0.246094	0.492188	0.696058	0.887304	1.10056	1.25484	1.54591	1.79159	2.17242	2.5646	2.8059	3.20867	3.70501	4.38157	5.12088	5.94712	7.1748	8.8217	10.7439	13.932	17.057	20.4258	23.4629	28.531	35.8132	45.5728	64.6107	138.392
0.246094	0.492188	0.696058	0.887304	1.10056	1.25484	1.54832	1.79159	2.17691	2.56491	2.81142	3.20867	3.70692	4.38157	5.13859	5.94712	7.20971	8.8217	10.7766	13.9575	17.0657	20.4334	23.4926	28.5575	35.8194	45.7821	64.6411	138.856
0.246094	0.492188	0.696058	0.887304	1.10056	1.25504	1.54849	1.79159	2.18064	2.56929	2.81211	3.21287	3.70955	4.40027	5.13859	5.95221	7.22083	8.87304	10.8057	13.9668	17.0854	20.4495	23.4978	28.6974	35.8384	45.79	64.7022	139.662
0.246094	0.492188	0.696058	0.887304	1.10056	1.2561	1.55158	1.79159	2.18705	2.56929	2.82864	3.23686	3.7207	4.41237	5.17153	5.95221	7.23783	8.87645	10.8057	14.0079	17.1102	20.4512	23.5081	28.7657	35.8413	45.8481	64.7493	139.683
0.246094	0.492188	0.696058	0.887304	1.10056	1.26151	1.55544	1.79159	2.19201	2.56929	2.83592	3.24831	3.72116	4.42969	5.17289	5.95221	7.24202	8.89008	10.8197	14.0317	17.1384	20.4686	23.5351	28.8045	35.9286	45.8983	64.7989	140.003
0.246094	0.492188	0.696058	0.887304	1.10056	1.26198	1.55643	1.80355	2.19262	2.56929	2.8362	3.26724	3.72407	4.42969	5.17382	5.95221	7.25692	8.89349	10.8393	14.0941	17.1861	20.4969	23.5398	28.8728	35.9575	45.9609	64.9184	140.15
0.246094	0.492188	0.696058	0.887304	1.101	1.26302	1.55643	1.80417	2.19659	2.56929	2.84759	3.27109	3.72995	4.42969	5.17382	5.9573	7.26118	8.9085	10.8533	14.1048	17.1861	20.5263	23.5642	28.9332	36.0105	46.0752	64.9293	140.259
0.246094	0.492188	0.696058	0.887304	1.10349	1.2648	1.55643	1.80581	2.20113	2.56929	2.85929	3.2833	3.73335	4.43523	5.19135	5.97397	7.28772	8.91729	10.8533	14.1587	17.1995	20.5367	23.6014	28.9702	36.0853	46.1221	65.127	141.081
0.246094	0.492188	0.696058	0.887304	1.10454	1.2648	1.55643	1.81137	2.20113	2.56929	2.85929	3.2833	3.73923	4.43652	5.19135	5.98772	7.28901	8.91729	10.9283	14.2011	17.2283	20.5735	23.6166	28.9702	36.1012	46.1245	65.3169	142.124
0.246094	0.492188	0.696058	0.887304	1.10482	1.2703	1.55643	1.81723	2.20113	2.5738	2.85935	3.2833	3.74232	4.43652	5.20341	5.99277	7.29196	8.92069	10.9643	14.2018	17.2299	20.5811	23.6711	29.0119	36.1188	46.1309	65.3526	143.972
0.246094	0.492188	0.696058	0.887304	1.10519	1.27402	1.55643	1.81781	2.20113	2.58135	2.8627	3.28495	3.74735	4.43652	5.2054	5.99277	7.29528	8.92574	10.9705	14.2772	17.2353	20.5853	23.6877	29.0331	36.1188	46.1816	65.3702	144.155
0.246094	0.492188	0.696058	0.887304	1.10831	1.27432	1.55643	1.8197	2.20113	2.59385	2.87737	3.29404	3.74839	4.43652	5.21463	5.99432	7.31689	8.92701	10.9753	14.3073	17.2494	20.5926	23.7503	29.0988	36.1297	46.2049	65.3781	144.469
0.246094	0.492188	0.696058	0.891295	1.10854	1.27514	1.55643	1.82301	2.20113	2.6016	2.87811	3.29651	3.74879	4.43652	5.21463	6.00044	7.34168	8.92969	11.0398	14.3073	17.2663	20.5961	23.7528	29.1188	36.1322	46.2442	65.5589	144.8
0.246094	0.492188	0.696058	0.891522	1.1093	1.27589	1.55643	1.82542	2.20113	2.61248	2.88045	3.30169	3.75	4.43772	5.21463	6.00765	7.34168	8.9478	11.0407	14.3179	17.3013	20.6044	23.7634	29.1566	36.1749	46.2565	65.6037	144.9
0.246094	0.492188	0.696058	0.892203	1.1093	1.2939	1.55643	1.82597	2.20113	2.61266	2.88045	3.30532	3.76778	4.44198	5.22044	6.00791	7.34168	8.95251	11.0781	14.3348	17.304	20.6132	23.7828	29.165	36.1936	46.3118	65.718	145.972
0.246094	0.492188	0.696058	0.894346	1.11289	1.2939	1.55643	1.83328	2.20113	2.61601	2.88045	3.30718	3.7864	4.45695	5.2243	6.00839	7.36105	8.95795	11.0852	14.3348	17.3261	20.6203	23.7949	29.1832	36.2101	46.4459	65.7918	147.215
0.246094	0.492188	0.696058	0.900142	1.11828	1.299	1.5629	1.83799	2.20113	2.61601	2.88198	3.31085	3.78678	4.45695	5.23635	6.01044	7.36855	8.96953	11.1102	14.3496	17.3379	20.6252	23.8292	29.2614	36.2427	46.4459	65.9418	147.549
0.246094	0.492188	0.697178	0.905302	1.12519	1.308	1.56786	1.83946	2.20458	2.61601	2.886	3.31085	3.81181	4.46258	5.24803	6.05311	7.3746	8.97456	11.1453	14.3539	17.3651	20.6366	23.8457	29.281	36.2435	46.4553	65.9979	148.364
0.246094	0.492188	0.701369	0.905372	1.12591	1.30984	1.56879	1.84532	2.20706	2.61601	2.89005	3.31085	3.81364	4.46587	5.25499	6.05311	7.38691	8.9963	11.1505	14.377	17.3684	20.6367	23.8724	29.2999	36.2494	46.4635	66.0613	148.545
0.246094	0.492188	0.703204	0.907121	1.12951	1.31518	1.57077	1.85268	2.21093	2.61601	2.89309	3.31085	3.8204	4.46815	5.26088	6.07807	7.38787	9.00983	11.1621	14.4248	17.3753	20.6521	23.9028	29.3435	36.3053	46.4744	66.0898	148.924
0.246094	0.492188	0.704634	0.908657	1.12995	1.31543	1.57577	1.85869	2.21129	2.6165	2.90179	3.31085	3.8204	4.46921	5.26088	6.07807	7.40266	9.0154	11.1722	14.4443	17.38	20.6733	23.9433	29.344	36.3066	46.486	66.1077	149.04
0.246094	0.492188	0.705955	0.910807	1.13032	1.31947	1.57577	1.86652	2.21238	2.61682	2.90922	3.31928	3.8204	4.46943	5.26088	6.09387	7.40329	9.0215	11.1858	14.463	17.3981	20.6733	23.9433	29.3513	36.3853	46.523	66.1924	149.724
0.246094	0.492188	0.706699	0.91167	1.13475	1.31998	1.57577	1.87375	2.21431	2.61688	2.91021	3.32692	3.8204	4.48316	5.29113	6.11284	7.40544	9.02866	11.2908	14.4882	17.4198	20.6953	23.9433	29.4024	36.4235	46.6069	66.1982	150.016
0.246326	0.492188	0.706931	0.912329	1.13823	1.32123	1.57577	1.87419	2.21484	2.61869	2.91886	3.32972	3.82832	4.49079	5.30091	6.13856	7.41963	9.03536	11.3203	14.5049	17.4571	20.6953	23.9711	29.4337	36.4767	46.7093	66.2376	150.355
0.246853	0.492188	0.708533	0.912341	1.13903	1.32339	1.57577	1.87419	2.21484	2.62408	2.9231	3.33384	3.82832	4.49079	5.30102	6.14534	7.44014	9.07549	11.3203	14.5216	17.4571	20.7012	23.9827	29.4579	36.4876	46.7702	66.2651	151.271
0.246859	0.492188	0.710037	0.912881	1.13953	1.32346	1.57577	1.87574	2.21537	2.6302	2.92613	3.33994	3.82977	4.49559	5.30102	6.15234	7.4458	9.07549	11.3225	14.5262	17.4622	20.7067	23.9945	29.5036	36.6073	46.7746	66.3632	151.625
0.246955	0.492188	0.713639	0.916572	1.14152	1.32368	1.57577	1.88166	2.2186	2.64103	2.95312	3.34724	3.83159	4.5061	5.31361	6.15234	7.45179	9.07883	11.427	14.5279	17.4632	20.7071	24.0513	29.5229	36.6556	46.8127	66.4075	153.468
0.246961	0.492188	0.714631	0.916586	1.14409	1.32453	1.57577	1.88384	2.22242	2.64249	2.96336	3.34724	3.83325	4.51768	5.32579	6.172	7.48465	9.10547	11.4612	14.5425	17.4752	20.7216	24.0682	29.5825	36.746	46.818	66.4148	153.533
0.24719	0.492188	0.717098	0.919099	1.14775	1.32526	1.57577	1.88577	2.22283	2.64492	2.96336	3.34724	3.84905	4.52438	5.39276	6.20989	7.48465	9.10879	11.4612	14.5447	17.4779	20.7712	24.0682	29.5836	36.765	46.8379	66.4326	153.572
0.247525	0.492188	0.718202	0.922801	1.15288	1.32526	1.57577	1.91147	2.22335	2.65051	2.96336	3.34724	3.85198	4.52438	5.39726	6.2306	7.48465	9.11876	11.4902	14.5552	17.5008	20.7785	24.0833	29.7342	36.9025	46.8546	66.5572	154.394
0.247951	0.492188	0.720736	0.923573	1.16045	1.32526	1.57591	1.91522	2.22476	2.65051	2.97062	3.3604	3.85487	4.53636	5.39726	6.26114	7.48465	9.13416	11.5218	14.5944	17.5396	20.7791	24.1034	29.8271	36.9033	46.8867	66.6955	154.664
0.248047	0.492188	0.721501	0.930295	1.16117	1.32526	1.57779	1.91682	2.22847	2.65051	2.97258	3.36111	3.85804	4.53774	5.40286	6.27418	7.48465	9.13789	11.5218	14.5944	17.584	20.8041	24.1245	29.8333	36.9346	46.9132	66.7186	155.091
0.248047	0.492188	0.721789	0.932471	1.16186	1.32526	1.57793	1.92205	2.22847	2.65051	2.97356	3.36292	3.8609	4.53774	5.40286	6.27902	7.50081	9.15522	11.5349	14.6214	17.5983	20.8785	24.1373	29.8705	36.9831	46.9214	66.7369	155.538
0.248047	0.492188	0.722097	0.937957	1.16574	1.32526	1.58827	1.92205	2.22847	2.65103	2.97356	3.36808	3.86823	4.53774	5.41965	6.2798	7.51292	9.17316	11.569	14.6287	17.6011	20.9078	24.1448	29.9875	37.0026	47.0552	66.7412	156.417
0.248047	0.492188	0.72388	0.938719	1.1675	1.32526	1.58827	1.92205	2.22847	2.66191	2.97356	3.37279	3.89108	4.53774	5.41965	6.29261	7.53181	9.19482	11.627	14.6524	17.6176	20.918	24.1749	29.9981	37.0058	47.0892	66.9833	156.771
0.248047	0.492188	0.725498	0.941683	1.1694	1.32526	1.58881	1.92205	2.22847	2.66191	2.98306	3.38577	3.89108	4.53774	5.41965	6.29688	7.53304	9.21456	11.6318	14.6524	17.6176	20.9205	24.2548	30.0295	37.0982	47.1043	66.9996	157.569
0.248047	0.492188	0.728593	0.943807	1.16977	1.32526	1.59161	1.92384	2.23362	2.66191	2.99386	3.39132	3.89108	4.53774	5.41984	6.36747	7.5491	9.23753	11.6733	14.6921	17.6228	20.9541	24.2613	30.0299	37.2115	47.2276	67.0284	157.827
0.248047	0.492188	0.72939	0.944037	1.17055	1.32526	1.59438	1.92835	2.23362	2.66191	2.99386	3.39356	3.89108	4.53774	5.42185	6.38185	7.5491	9.24736	11.6767	14.7047	17.6811	20.962	24.2636	30.0527	37.2188	47.2455	67.0915	159.339
0.248047	0.492188	0.729474	0.945657	1.17923	1.32581	1.59451	1.92844	2.23511	2.66191	2.99386	3.4049	3.89108	4.57761	5.43639	6.39844	7.58113	9.26372	11.6914	14.7677	17.7205	20.97	24.2809	30.102	37.2578	47.266	67.1474	159.345
0.248047	0.492188	0.73336	0.947283	1.18111	1.33024	1.59546	1.93636	2.24645	2.66769	2.99386	3.40631	3.89236	4.57761	5.43801	6.39844	7.58113	9.26372	11.701	14.8105	17.7461	21.0119	24.3151	30.1171	37.26	47.2993	67.2034	160.255
0.248047	0.492188	0.734467	0.94904	1.18491	1.33119	1.59912	1.94321	2.25078	2.66797	2.99386	3.40777	3.89969	4.57761	5.46417	6.39844	7.58695	9.28264	11.7534	14.8393	17.7631	21.0404	24.3384	30.1646	37.2902	47.3281	67.2178	161.126
0.248047	0.492188	0.734561	0.950511	1.18504	1.3352	1.60006	1.94666	2.25889	2.67155	2.99397	3.40992	3.91047	4.57961	5.46667	6.39844	7.61425	9.30277	11.758	14.8678	17.7639	21.0924	24.3844	30.2525	37.2903	47.3685	67.4086	162.218
0.248047	0.492188	0.735588	0.951686	1.18528	1.34492	1.60233	1.94667	2.26887	2.67155	2.99571	3.41091	3.91087	4.5913	5.49138	6.41734	7.6408	9.30286	11.7768	14.88	17.7649	21.1412	24.4648	30.3439	37.2942	47.3965	67.4601	163.187
0.248047	0.492188	0.735654	0.954062	1.18676	1.3457	1.60632	1.94875	2.26887	2.67288	2.99657	3.41884	3.9113	4.59741	5.49674	6.42487	7.6408	9.30286	11.7852	14.897	17.7768	21.1951	24.5248	30.3455	37.3031	47.4175	67.5644	163.912
0.248047	0.492188	0.738115	0.95517	1.18908	1.35437	1.61804	1.94939	2.26887	2.67539	2.99832	3.42369	3.9238	4.59741	5.50282	6.42545	7.6408	9.31588	11.8151	14.9489	17.804	21.1998	24.533	30.4292	37.3187	47.4776	67.5795	169.276
0.248088	0.492188	0.738281	0.957983	1.19089	1.35564	1.61992	1.94999	2.26887	2.6765	2.99926	3.42769	3.9375	4.59741	5.50282	6.43489	7.6408	9.32353	11.8227	14.9693	17.8575	21.2041	24.5663	30.4645	37.3431	47.5318	67.6984	191.364
0.24884	0.492188	0.738281	0.962955	1.19283	1.35758	1.62633	1.95231	2.26887	2.67874	3.00057	3.42769	3.9375	4.60669	5.50282	6.44089	7.64477	9.3386	11.8355	14.9814	17.8888	21.2155	24.595	30.4779	37.3431	47.5875	68.0003	191.548
0.249018	0.492188	0.738281	0.963537	1.19291	1.35905	1.62651	1.95334	2.26887	2.68005	3.00396	3.42769	3.9375	4.61394	5.50448	6.45967	7.64477	9.3548	11.8534	15.0137	17.9159	21.2353	24.636	30.4795	37.4014	47.7612	68.2279	191.677
0.249475	0.492188	0.738281	0.966058	1.19486	1.36419	1.63408	1.95576	2.26887	2.68155	3.00396	3.42769	3.93824	4.61504	5.52208	6.45967	7.64477	9.35532	11.9044	15.0198	17.9161	21.2497	24.6725	30.4914	37.4071	47.7901	68.262
0.249538	0.492188	0.738281	0.9674	1.19874	1.36459	1.63422	1.96633	2.26887	2.68672	3.00632	3.44531	3.94209	4.63759	5.53027	6.45967	7.66455	9.37097	11.907	15.0198	18.0141	21.2578	24.6745	30.5097	37.4232	47.8011	68.465
0.249839	0.492188	0.738281	0.968854	1.19989	1.36593	1.63812	1.96672	2.26887	2.68762	3.00658	3.44598	3.94518	4.64887	5.53027	6.45967	7.68521	9.37097	11.907	15.0359	18.0219	21.2626	24.6778	30.5097	37.4726	47.8341	68.5935
0.250258	0.493539	0.738281	0.969338	1.20083	1.36669	1.64231	1.96875	2.26887	2.68845	3.01307	3.44621	3.94518	4.66415	5.53027	6.51568	7.68821	9.37097	11.918	15.0359	18.0254	21.2853	24.6794	30.5583	37.5041	47.9058	68.6037
0.250492	0.495334	0.738281	0.970009	1.20492	1.37454	1.64829	1.96875	2.26887	2.69625	3.01529	3.44812	3.94518	4.66477	5.53682	6.51568	7.70395	9.37485	11.9982	15.044	18.0523	21.3322	24.688	30.5642	37.5265	47.9927	68.6959
0.250563	0.495548	0.738281	0.97075	1.20527	1.37534	1.65085	1.96875	2.27272	2.70204	3.02422	3.45239	3.94518	4.6693	5.5465	6.51568	7.70788	9.40323	12.0074	15.058	18.0736	21.3322	24.7981	30.5642	37.5686	48.0635	68.7677
0.25061	0.495913	0.738281	0.972141	1.20546	1.37752	1.65085	1.96875	2.27925	2.7029	3.02569	3.45405	3.94922	4.6693	5.5465	6.53238	7.72358	9.41932	12.0083	15.0842	18.0785	21.3322	24.8262	30.742	37.5888	48.099	68.8073
0.251519	0.496094	0.738281	0.976853	1.20657	1.3834	1.65085	1.96875	2.28688	2.70311	3.02576	3.45409	3.96208	4.6693	5.54828	6.55275	7.73038	9.41932	12.0209	15.1002	18.0872	21.3691	24.8795	30.7788	37.6035	48.1254	68.8621
0.251586	0.496094	0.738281	0.979093	1.21102	1.39006	1.65085	1.97522	2.28988	2.70703	3.03172	3.46943	3.96814	4.6693	5.56847	6.55275	7.78631	9.46742	12.0521	15.1102	18.1013	21.3791	24.9078	30.8224	37.6147	48.1505	68.8821
0.251999	0.496094	0.738281	0.979507	1.21158	1.39182	1.65085	1.97617	2.29185	2.70846	3.03801	3.47454	3.96814	4.6693	5.57416	6.56722	7.78868	9.49935	12.0686	15.1623	18.1235	21.4184	24.9139	30.8404	37.6773	48.2435	68.9752
0.252159	0.496162	0.738281	0.980987	1.21228	1.39212	1.65085	1.97712	2.29586	2.71162	3.04401	3.48029	3.96814	4.6693	5.58527	6.57839	7.83356	9.51659	12.1087	15.1942	18.2109	21.4342	24.9592	30.86	37.6829	48.2557	68.9759
0.252227	0.497078	0.738281	0.983097	1.21587	1.39212	1.65085	1.98407	2.29664	2.71819	3.04401	3.48029	3.96814	4.6693	5.58623	6.60339	7.84688	9.52154	12.1187	15.2077	18.2475	21.4427	24.9753	30.8745	37.7102	48.2971	69.0517
0.252674	0.497865	0.738281	0.983443	1.21735	1.39212	1.65085	1.98407	2.2997	2.71819	3.04401	3.49117	3.97577	4.6693	5.59619	6.60785	7.87884	9.55655	12.2183	15.2286	18.2707	21.461	25.0024	30.8852	37.8393	48.3182	69.0897
0.253004	0.497882	0.738281	0.984276	1.21996	1.39212	1.65085	1.98407	2.30717	2.71819	3.04502	3.49133	3.97712	4.69065	5.6118	6.62628	7.89456	9.57238	12.2551	15.2657	18.3411	21.4892	25.0049	30.9538	37.8417	48.3685	69.2263
0.253039	0.499258	0.738281	0.984375	1.22009	1.39212	1.65218	1.98407	2.31007	2.71819	3.05075	3.4934	3.97761	4.69372	5.6118	6.62628	7.92483	9.57474	12.2689	15.2895	18.3715	21.5005	25.0687	30.9922	37.9567	48.3685	69.4407
0.253691	0.499516	0.738281	0.984375	1.22101	1.39212	1.65688	1.98407	2.31056	2.71819	3.05682	3.50052	3.97998	4.70161	5.6118	6.64696	7.92483	9.58503	12.2998	15.3073	18.3913	21.5005	25.1221	31.0205	38.0133	48.3911	69.4464
0.254405	0.499566	0.738281	0.984375	1.22303	1.39212	1.65727	1.98407	2.31973	2.71819	3.05907	3.50694	3.98069	4.70161	5.6118	6.67426	7.93221	9.59123	12.2998	15.3073	18.4304	21.5266	25.1385	31.0376	38.106	48.4176	69.4687
0.254478	0.500308	0.738281	0.984375	1.22521	1.39577	1.65752	1.98407	2.32164	2.71819	3.07747	3.50791	3.98078	4.70371	5.61719	6.68188	7.9366	9.65114	12.3071	15.3244	18.4374	21.5567	25.1462	31.0786	38.1572	48.556	69.5226
0.254745	0.500872	0.738281	0.984375	1.22881	1.3959	1.66137	1.98407	2.32164	2.71819	3.07971	3.52049	3.99065	4.71039	5.61719	6.68704	7.95153	9.66812	12.3202	15.3291	18.4439	21.5736	25.2519	31.1287	38.1572	48.7297	69.5366
0.254918	0.501528	0.738281	0.984375	1.23047	1.3967	1.66281	1.98407	2.32164	2.72316	3.07971	3.52353	4.00008	4.71956	5.62258	6.69103	7.95153	9.68164	12.3661	15.3291	18.498	21.6029	25.2667	31.1326	38.3125	48.7368	69.544
0.254954	0.504023	0.738281	0.984375	1.23047	1.40295	1.66395	1.98407	2.32336	2.7359	3.08355	3.52353	4.00612	4.72731	5.62258	6.69447	7.97055	9.68559	12.393	15.335	18.5013	21.6185	25.3381	31.1898	38.3733	48.8077	69.5906
0.255303	0.504987	0.738281	0.984375	1.23047	1.40317	1.6673	1.98407	2.32383	2.73668	3.08355	3.52353	4.00612	4.73031	5.62899	6.69447	8.01223	9.7285	12.4048	15.3451	18.5634	21.6185	25.364	31.2065	38.4991	48.8112	69.6199
0.255492	0.505941	0.738281	0.984375	1.23047	1.4061	1.67331	1.98407	2.33465	2.74471	3.08355	3.52353	4.04392	4.73371	5.66016	6.69447	8.04617	9.73549	12.529	15.353	18.5634	21.6367	25.3826	31.2161	38.5014	48.8389	69.6276
0.255616	0.507422	0.738281	0.984375	1.23047	1.40838	1.67557	1.98407	2.33465	2.74474	3.08355	3.52523	4.04477	4.73371	5.66016	6.7084	8.06121	9.75103	12.5484	15.3913	18.6025	21.6395	25.3864	31.2549	38.5225	48.9157	69.6659
0.256569	0.508345	0.738281	0.984375	1.23047	1.40892	1.67931	1.9878	2.33465	2.75141	3.08355	3.53016	4.04796	4.73371	5.66256	6.71705	8.06121	9.75103	12.5484	15.4118	18.6275	21.6576	25.4229	31.2626	38.6312	49.0029	69.9649
0.257369	0.511344	0.738281	0.984375	1.23047	1.41525	1.68004	1.9924	2.3359	2.75141	3.0954	3.53802	4.05342	4.73893	5.66571	6.72156	8.08019	9.75103	12.5573	15.4158	18.6318	21.6814	25.4539	31.286	38.6441	49.01	70.1367
0.258563	0.512491	0.738281	0.984375	1.23047	1.42324	1.6823	1.99456	2.33808	2.75141	3.10175	3.54192	4.05425	4.75286	5.67779	6.728	8.11736	9.76964	12.5893	15.4164	18.6486	21.6814	25.4573	31.3323	38.6677	49.1246	70.1445
0.258655	0.513203	0.738281	0.984375	1.23047	1.42595	1.69215	1.99828	2.34256	2.75141	3.10336	3.54921	4.05504	4.75286	5.67798	6.7575	8.11736	9.78047	12.611	15.4177	18.6741	21.7124	25.4621	31.3585	38.6775	49.1412	70.3092
0.258703	0.514379	0.738281	0.984375	1.23047	1.42783	1.69538	1.99982	2.34825	2.75141	3.10571	3.55028	4.06244	4.75286	5.68152	6.7575	8.11736	9.82528	12.6158	15.4687	18.7143	21.7158	25.5078	31.3709	38.7048	49.1469	70.3716
0.259324	0.515206	0.738281	0.984375	1.23047	1.42913	1.69892	1.99982	2.35677	2.75459	3.11017	3.55149	4.07358	4.76477	5.68329	6.7575	8.12109	9.82528	12.6233	15.4705	18.729	21.7525	25.519	31.3709	38.7369	49.1855	70.4383
0.259648	0.515619	0.738281	0.984375	1.23047	1.42946	1.70575	2.00265	2.36578	2.75807	3.11199	3.55278	4.07358	4.77465	5.70975	6.7575	8.12482	9.83452	12.6351	15.5046	18.7419	21.7535	25.5191	31.4176	38.7418	49.2559	70.4499
0.259754	0.516526	0.738281	0.984375	1.23047	1.42969	1.70645	2.00468	2.36789	2.75813	3.11287	3.57016	4.08023	4.77828	5.72399	6.76073	8.12519	9.84086	12.6612	15.5351	18.8451	21.7692	25.5476	31.4244	38.753	49.3545	70.5032
0.260401	0.517275	0.738281	0.984375	1.23047	1.43496	1.70646	2.00839	2.37482	2.76133	3.11287	3.5728	4.09582	4.77828	5.72399	6.80662	8.14462	9.84375	12.7043	15.5371	18.9508	21.7901	25.5681	31.4821	38.8056	49.4557	70.5221
0.260418	0.518685	0.738281	0.984375	1.23047	1.43496	1.71603	2.01595	2.38463	2.76265	3.11287	3.57357	4.09705	4.77828	5.72661	6.80662	8.15087	9.84683	12.7043	15.5643	19.015	21.7956	25.5807	31.5173	38.8102	49.5922	70.5522
0.261052	0.519451	0.738281	0.984375	1.23047	1.43496	1.71745	2.01703	2.38913	2.76467	3.11287	3.58318	4.09806	4.80239	5.73984	6.81159	8.15458	9.8499	12.7637	15.6051	19.0411	21.804	25.5961	31.5909	38.8769	49.6018	70.6508
0.261101	0.519973	0.738281	0.984375	1.23047	1.43496	1.72266	2.02306	2.39237	2.76743	3.11287	3.58318	4.12528	4.81312	5.74512	6.81864	8.18054	9.85975	12.7708	15.6284	19.0439	21.8248	25.6182	31.6238	38.9011	49.6349	70.7211
0.261219	0.52021	0.738281	0.984375	1.23047	1.43496	1.72266	2.02934	2.39492	2.78191	3.11298	3.58367	4.12955	4.8162	5.75964	6.82439	8.18054	9.88366	12.7723	15.6439	19.0512	21.8518	25.628	31.6297	38.9521	49.6522	70.7551
0.261294	0.522034	0.738281	0.984375	1.23047	1.43496	1.72266	2.02934	2.39768	2.78423	3.12067	3.5871	4.13545	4.83498	5.76091	6.83596	8.18555	9.89589	12.7756	15.6613	19.0544	21.9023	25.6294	31.684	39.0352	49.6628	70.7842
0.261415	0.522788	0.738281	0.986725	1.23047	1.43496	1.72266	2.02934	2.40104	2.78423	3.14521	3.5898	4.13993	4.83498	5.76277	6.83769	8.19278	9.90814	12.7969	15.7385	19.0611	21.9079	25.6434	31.6899	39.0488	49.7056	70.9157
0.261662	0.522946	0.738281	0.987112	1.23047	1.43496	1.72266	2.02934	2.40369	2.78423	3.15154	3.59604	4.15802	4.83498	5.76842	6.85538	8.20582	9.90814	12.7992	15.7442	19.0688	21.9079	25.6469	31.7364	39.0719	49.7189	70.9245
0.261667	0.523782	0.740059	0.988679	1.23047	1.43496	1.7259	2.02934	2.40706	2.78423	3.15755	3.60571	4.18311	4.83553	5.76925	6.86421	8.21378	9.90814	12.8347	15.7661	19.102	21.9286	25.6658	31.7652	39.0731	49.8465	71.0009
0.261997	0.523796	0.741147	0.992188	1.23047	1.43496	1.73552	2.02934	2.41813	2.7895	3.15979	3.63353	4.18359	4.84249	5.78452	6.86421	8.25424	9.92036	12.8347	15.7666	19.1084	21.9479	25.6764	31.7898	39.1046	49.9576	71.0533
0.262015	0.524501	0.744141	0.992188	1.23047	1.43496	1.73795	2.02934	2.42043	2.80547	3.16292	3.6343	4.18702	4.85373	5.79071	6.86421	8.25424	9.92036	12.8465	15.7673	19.1131	21.9727	25.6894	31.7928	39.1629	49.9788	71.142
0.26207	0.526001	0.744141	0.992298	1.23047	1.43716	1.74015	2.02934	2.42374	2.8059	3.1784	3.65431	4.19083	4.85373	5.79236	6.86937	8.25941	9.92036	12.8771	15.792	19.1543	21.9727	25.7094	31.8438	39.1784	50.0404	71.1433
0.262275	0.52791	0.744141	0.994109	1.23047	1.44223	1.74015	2.03762	2.42374	2.8059	3.18294	3.65845	4.19083	4.86482	5.81096	6.89314	8.2689	9.94644	12.8818	15.8592	19.1784	22.025	25.736	31.8537	39.2879	50.0848	71.1722
0.262485	0.529627	0.744141	0.994219	1.23047	1.4465	1.74015	2.04467	2.42374	2.8059	3.19013	3.65845	4.19083	4.8733	5.82474	6.89859	8.28973	9.95419	12.8935	15.9031	19.2162	22.0251	25.7565	31.8794	39.2926	50.1168	71.3494
0.262621	0.529706	0.744141	0.99508	1.23047	1.44812	1.74015	2.06171	2.42374	2.8059	3.1902	3.65895	4.20525	4.88482	5.83403	6.94752	8.30179	9.96604	12.9068	15.9031	19.2346	22.0402	25.76	31.9619	39.3358	50.1858	71.3643
0.262652	0.529748	0.747815	0.997001	1.23047	1.44818	1.74015	2.06698	2.42374	2.8059	3.19243	3.67292	4.20525	4.90134	5.83403	6.94752	8.30179	9.97211	12.9123	15.9035	19.2507	22.0625	25.7634	31.9619	39.3817	50.2495	71.4413
0.262773	0.531697	0.747961	0.997559	1.23047	1.44914	1.74015	2.07409	2.42436	2.8059	3.19922	3.67557	4.20525	4.90338	5.83403	6.96058	8.32509	9.99335	12.9123	15.9069	19.2683	22.0731	25.7749	32.0537	39.4499	50.252	71.467
0.262924	0.532007	0.749568	1.00706	1.23047	1.45042	1.74015	2.07552	2.43507	2.8059	3.19922	3.69141	4.20525	4.92188	5.83403	6.96058	8.35162	10.0421	12.9193	15.9268	19.2725	22.0731	25.7859	32.0846	39.4722	50.2767	71.6847
0.263	0.532481	0.750992	1.00778	1.23047	1.45198	1.74015	2.07575	2.4362	2.8059	3.19922	3.69141	4.20525	4.92188	5.84958	6.96058	8.3527	10.0447	12.9334	15.9291	19.3107	22.0731	25.8045	32.0867	39.4984	50.289	71.7244
0.263036	0.532495	0.753128	1.00824	1.23047	1.45349	1.74015	2.0818	2.4362	2.81443	3.19922	3.69141	4.20525	4.92188	5.85412	6.96218	8.3582	10.0643	12.9521	15.9373	19.3279	22.0841	25.8398	32.1395	39.5162	50.2929	71.7784
0.263526	0.5326	0.754568	1.00964	1.23047	1.46209	1.74015	2.08457	2.4362	2.81539	3.19922	3.69853	4.21245	4.94642	5.85963	6.96493	8.37081	10.0712	12.9965	15.9961	19.3305	22.1019	25.841	32.1475	39.5477	50.3428	71.9289
0.263564	0.533945	0.754759	1.01084	1.23047	1.46234	1.74015	2.08817	2.43647	2.81572	3.20867	3.6996	4.21245	4.94642	5.87025	6.97112	8.38402	10.1258	12.9965	15.9961	19.3305	22.1389	25.8441	32.1881	39.5722	50.4069	71.9597
0.264187	0.534272	0.756602	1.01167	1.23047	1.46274	1.74015	2.08817	2.43698	2.8186	3.20867	3.6996	4.21245	4.94642	5.87025	7.00395	8.4105	10.1262	13.0404	16.0264	19.354	22.2657	25.8867	32.2104	39.6356	50.4196	71.973
0.264235	0.536346	0.759095	1.01408	1.23047	1.4677	1.74015	2.08817	2.44289	2.82263	3.20867	3.70321	4.21245	4.94642	5.87025	7.04705	8.4105	10.1377	13.0523	16.0433	19.3728	22.2766	25.9586	32.2843	39.655	50.4548	72.1403
0.264434	0.53718	0.759261	1.01467	1.23047	1.47656	1.74015	2.09224	2.44556	2.82777	3.20867	3.70395	4.21245	4.97694	5.88626	7.05135	8.41721	10.1467	13.0534	16.059	19.3731	22.2843	25.9793	32.3798	39.6871	50.5074	72.2213
0.264544	0.537278	0.760578	1.01467	1.23047	1.47656	1.74015	2.09334	2.44673	2.82817	3.20867	3.71385	4.21365	4.97694	5.9165	7.05135	8.4177	10.1893	13.0777	16.0716	19.3731	22.3025	25.9893	32.4135	39.6943	50.5506	72.2242
0.264914	0.537923	0.761675	1.01467	1.23047	1.47656	1.74015	2.10263	2.44904	2.83206	3.20867	3.71399	4.2147	4.97694	5.92917	7.05135	8.41868	10.1971	13.1194	16.0716	19.379	22.3118	26.0092	32.4713	39.72	50.593	72.2632
0.265643	0.538605	0.761948	1.01467	1.23047	1.47656	1.74388	2.10263	2.45597	2.83699	3.22052	3.71971	4.22856	4.98302	5.94896	7.05518	8.42101	10.1973	13.1332	16.1243	19.3863	22.3417	26.0267	32.4771	39.798	50.6977	72.454
0.265781	0.539031	0.763847	1.01467	1.23047	1.47656	1.74537	2.10263	2.4592	2.8444	3.22185	3.72273	4.22884	4.98302	5.94913	7.05636	8.44629	10.2092	13.2118	16.1293	19.4149	22.3634	26.0302	32.5055	39.8414	50.817	72.4724
0.266284	0.53947	0.765517	1.01467	1.23163	1.47656	1.7489	2.10263	2.46094	2.85008	3.22188	3.72407	4.23396	4.99185	5.95221	7.0692	8.45763	10.2358	13.2182	16.1918	19.4476	22.3715	26.0371	32.5229	39.8679	50.9344	72.7056
0.266737	0.539714	0.765869	1.01467	1.23647	1.47656	1.74947	2.10263	2.46094	2.85406	3.22611	3.72407	4.23396	5.00153	5.95221	7.08562	8.4593	10.2447	13.2526	16.1992	19.4803	22.3837	26.0522	32.5323	39.8679	50.9836	72.7914
0.268255	0.542069	0.766204	1.01467	1.24023	1.47656	1.7506	2.10263	2.46094	2.85428	3.22757	3.72407	4.23863	5.0162	5.9573	7.10269	8.47458	10.2565	13.2538	16.2016	19.501	22.4148	26.1251	32.5502	39.8764	51.0975	72.9017
0.268329	0.542809	0.768044	1.01467	1.24023	1.47656	1.75396	2.10263	2.46094	2.85575	3.22891	3.72407	4.24824	5.01935	5.95763	7.10269	8.47506	10.3366	13.2891	16.2057	19.5035	22.4148	26.1343	32.5533	39.8793	51.1927	72.9372
0.268837	0.543223	0.768411	1.01467	1.24102	1.47868	1.75429	2.10263	2.46094	2.85818	3.23686	3.72407	4.24824	5.02257	5.96345	7.11079	8.47506	10.3476	13.3187	16.2086	19.517	22.4148	26.1485	32.5533	39.9287	51.2785	73.1689
0.269045	0.543529	0.768544	1.01467	1.24267	1.47993	1.75976	2.10263	2.46094	2.86019	3.23686	3.72407	4.25464	5.04177	5.98772	7.14096	8.48577	10.3623	13.3255	16.2152	19.5176	22.4304	26.211	32.5533	39.9527	51.2846	73.2684
0.269423	0.54468	0.76894	1.01467	1.24394	1.48199	1.7613	2.11372	2.47036	2.86292	3.23686	3.73378	4.29784	5.04942	5.99277	7.14114	8.5354	10.3827	13.3822	16.2291	19.6151	22.4456	26.2214	32.5767	39.9893	51.3156	73.3998
0.270681	0.544894	0.770267	1.01467	1.24772	1.48362	1.76196	2.11394	2.47321	2.86394	3.24338	3.74079	4.29784	5.05982	5.99945	7.15367	8.54268	10.3911	13.3889	16.2316	19.6151	22.4486	26.2526	32.5823	39.9971	51.384	73.4106
0.271429	0.545521	0.771119	1.01467	1.24803	1.4852	1.76268	2.11698	2.47321	2.86631	3.24627	3.74251	4.29784	5.06153	6.02222	7.15367	8.54268	10.4045	13.3903	16.2496	19.6156	22.4539	26.2877	32.5858	40.0249	51.4474	73.4424
0.271504	0.54719	0.771566	1.01467	1.24875	1.48651	1.76312	2.11698	2.47321	2.86943	3.25048	3.74839	4.29784	5.06918	6.04591	7.16636	8.54268	10.4089	13.4273	16.259	19.6265	22.4645	26.2941	32.6081	40.0586	51.4624	73.4742
0.27222	0.547218	0.771568	1.01467	1.25484	1.48828	1.7662	2.11698	2.47321	2.86992	3.26378	3.74839	4.29784	5.07335	6.04974	7.16636	8.58511	10.4409	13.4364	16.259	19.629	22.4647	26.2952	32.6081	40.0861	51.4669	73.8224
0.272244	0.54793	0.772002	1.01467	1.25484	1.48864	1.76799	2.11698	2.47358	2.86992	3.26937	3.75363	4.29784	5.07366	6.05311	7.1748	8.59406	10.468	13.4379	16.259	19.6583	22.4999	26.3332	32.6118	40.114	51.476	73.9285
0.272538	0.547975	0.772421	1.01467	1.25484	1.49135	1.77289	2.11698	2.48391	2.86992	3.27518	3.75646	4.30488	5.07952	6.05311	7.1748	8.59569	10.4759	13.4544	16.272	19.6637	22.5024	26.3366	32.623	40.1404	51.5095	74.0354
0.27261	0.548832	0.773126	1.01467	1.25484	1.49196	1.77326	2.11698	2.48401	2.86992	3.27725	3.7623	4.30569	5.13859	6.07606	7.17546	8.59569	10.4929	13.4634	16.2962	19.667	22.5139	26.3445	32.6666	40.27	51.5456	74.0808
0.273107	0.5499	0.773633	1.01467	1.25484	1.49334	1.77432	2.11698	2.49185	2.86992	3.28208	3.76451	4.33905	5.13897	6.07807	7.18018	8.60976	10.5131	13.515	16.2962	19.6725	22.5661	26.3504	32.6944	40.2903	51.5518	74.084
0.273224	0.550282	0.774544	1.01467	1.25484	1.49693	1.77461	2.11698	2.49921	2.87346	3.2833	3.76451	4.34035	5.15767	6.07807	7.20429	8.61328	10.5677	13.5258	16.2983	19.689	22.5723	26.3922	32.7092	40.3121	51.5901	74.1596
0.27341	0.550282	0.778217	1.01467	1.25484	1.49693	1.77461	2.11873	2.50092	2.87829	3.2833	3.76451	4.34489	5.17382	6.07807	7.20674	8.6168	10.5677	13.5365	16.3247	19.6901	22.5816	26.4016	32.7748	40.3391	51.6052	74.1837
0.273848	0.550282	0.778217	1.01467	1.25484	1.49693	1.77461	2.11977	2.50202	2.87994	3.2833	3.76451	4.35259	5.17382	6.08603	7.23783	8.62069	10.5849	13.5391	16.3354	19.6957	22.6278	26.4497	32.7778	40.355	51.6686	74.3293
0.274024	0.550282	0.778217	1.01467	1.25484	1.49693	1.77461	2.12003	2.50348	2.87995	3.30029	3.76866	4.36079	5.18757	6.08767	7.23783	8.62462	10.5849	13.553	16.3743	19.7013	22.6366	26.4594	32.8653	40.3631	51.7564	74.3316
0.274151	0.550282	0.778217	1.01467	1.25484	1.49693	1.77461	2.12414	2.50967	2.88045	3.30169	3.77035	4.36079	5.19114	6.11201	7.24202	8.63505	10.6249	13.5776	16.418	19.7035	22.6967	26.4834	32.8867	40.4089	51.788	74.3862
0.274157	0.550282	0.778217	1.01467	1.25484	1.49693	1.77461	2.12569	2.50967	2.88045	3.30169	3.7783	4.36079	5.19135	6.11284	7.24377	8.64136	10.6249	13.591	16.4607	19.7299	22.6967	26.5074	32.8892	40.4473	51.833	74.5242
0.274438	0.550282	0.778217	1.01467	1.25484	1.49693	1.77461	2.12704	2.50967	2.88045	3.30236	3.77865	4.36232	5.19135	6.12631	7.25312	8.64469	10.6277	13.6201	16.4664	19.8205	22.7381	26.5565	32.9306	40.471	51.8594	74.5404
0.27492	0.550282	0.778217	1.01467	1.25484	1.49693	1.77461	2.13976	2.50967	2.88587	3.31085	3.78512	4.36779	5.207	6.13104	7.25447	8.64486	10.6468	13.6687	16.4901	19.835	22.782	26.6001	32.938	40.4756	51.8698	74.5441
0.275032	0.550282	0.778217	1.01467	1.25484	1.49693	1.77461	2.1399	2.50967	2.88628	3.31085	3.79438	4.37557	5.21463	6.13243	7.2638	8.66935	10.6959	13.6776	16.4901	19.8727	22.7897	26.6127	32.9595	40.4871	51.9141	74.5595
0.275141	0.550282	0.778217	1.01467	1.25484	1.49693	1.77461	2.14022	2.50967	2.89111	3.31085	3.82034	4.3812	5.21463	6.1435	7.27123	8.66935	10.6959	13.6937	16.5007	19.8953	22.799	26.6191	33.0601	40.5129	51.9398	74.8323
0.275321	0.550282	0.778217	1.01467	1.25484	1.49693	1.77461	2.14767	2.50967	2.8927	3.31085	3.8204	4.38157	5.21463	6.14871	7.27123	8.66935	10.7945	13.6967	16.5085	19.9453	22.8138	26.6248	33.0765	40.5301	52.0446	75.0025
0.275391	0.550282	0.778217	1.01467	1.25484	1.49693	1.77727	2.15306	2.50988	2.89561	3.31085	3.8204	4.38601	5.21463	6.15234	7.29378	8.66935	10.7945	13.7152	16.5323	19.9551	22.8284	26.6787	33.1085	40.5546	52.0846	75.107
0.276061	0.550282	0.778217	1.01467	1.25484	1.49693	1.7778	2.15674	2.51114	2.91328	3.316	3.8204	4.40226	5.22044	6.15234	7.3141	8.69725	10.8057	13.7152	16.5341	20.0124	22.8324	26.7058	33.2	40.6017	52.0847	75.3935
0.276098	0.550282	0.778217	1.01467	1.25539	1.49693	1.78243	2.1596	2.51496	2.92208	3.32017	3.8204	4.40226	5.23202	6.15234	7.31689	8.69725	10.8281	13.7295	16.5393	20.02	22.8496	26.7439	33.2169	40.7097	52.108	75.7969
0.276344	0.550282	0.778217	1.01467	1.25612	1.49693	1.78642	2.16001	2.53369	2.92723	3.32126	3.83388	4.42282	5.23202	6.15234	7.33866	8.69725	10.8393	13.7328	16.5396	20.0264	22.8986	26.7981	33.2372	40.7176	52.1369	75.8831
0.276539	0.550282	0.778217	1.01467	1.25663	1.49693	1.78869	2.16024	2.53369	2.93527	3.3244	3.84411	4.43192	5.23877	6.15764	7.34168	8.70073	10.8411	13.7747	16.5443	20.0306	22.9132	26.9003	33.2413	40.7313	52.2334	76.0605
0.276577	0.550282	0.778217	1.01467	1.26016	1.49693	1.79159	2.16025	2.53369	2.93562	3.3279	3.84772	4.43282	5.27129	6.16709	7.34753	8.70073	10.8533	13.7812	16.5451	20.0373	22.9198	26.9189	33.26	40.7425	52.3222	76.088
0.276861	0.550282	0.778217	1.01467	1.26278	1.49693	1.79159	2.16033	2.53369	2.93569	3.33363	3.85072	4.43652	5.28386	6.19648	7.35807	8.73708	10.8892	13.801	16.5457	20.0729	22.9289	26.9367	33.279	40.7959	52.5011	76.1747
0.27769	0.550282	0.778217	1.01467	1.26385	1.49693	1.79159	2.16092	2.53369	2.93621	3.33436	3.85198	4.43652	5.30102	6.21113	7.3746	8.73893	10.8978	13.801	16.5521	20.0773	22.9396	26.9425	33.279	40.8309	52.5559	76.3034
0.278886	0.550282	0.778217	1.01467	1.26663	1.49693	1.79159	2.16124	2.53369	2.94183	3.3368	3.85198	4.43652	5.30264	6.21113	7.37496	8.76141	10.8978	13.8164	16.6036	20.0834	22.9515	27.0703	33.3417	40.8382	52.6761	76.3581
0.278945	0.550282	0.778217	1.02272	1.26685	1.49693	1.79159	2.16161	2.54177	2.95695	3.34089	3.85498	4.43652	5.31298	6.22573	7.37718	8.78386	10.8978	13.824	16.6364	20.1406	22.9684	27.0846	33.3623	40.8558	52.8002	76.4722
0.279132	0.550282	0.778217	1.02272	1.26685	1.49693	1.79159	2.16251	2.54323	2.96289	3.34692	3.8592	4.43652	5.32298	6.22573	7.38281	8.78799	10.8978	13.8329	16.6367	20.1767	22.9987	27.0983	33.3791	40.9238	52.8386	76.5387
0.279201	0.550282	0.778217	1.02272	1.26982	1.50202	1.79159	2.16775	2.55014	2.96291	3.34724	3.8709	4.43652	5.32382	6.24572	7.38691	8.79419	10.8978	13.9004	16.6805	20.1767	23.0239	27.1038	33.3846	40.9786	52.8781	76.545
0.279985	0.550282	0.778217	1.02277	1.27235	1.51979	1.79159	2.17171	2.55967	2.96336	3.34724	3.87865	4.43652	5.32502	6.25383	7.38691	8.79419	10.9006	13.9526	16.7344	20.1797	23.0697	27.2376	33.4334	41.0534	52.9674	76.5605
0.280117	0.550282	0.778217	1.02433	1.27598	1.5208	1.79159	2.19176	2.56007	2.96336	3.34724	3.88892	4.43652	5.33131	6.26659	7.3969	8.80452	10.9129	13.9581	16.738	20.1812	23.0778	27.3009	33.4457	41.091	53.0567	76.617
0.280545	0.550282	0.778217	1.03048	1.27646	1.5221	1.79159	2.19583	2.56229	2.96336	3.34724	3.89108	4.43652	5.34309	6.27418	7.40329	8.81139	10.9134	13.9581	16.812	20.2022	23.1163	27.4503	33.4633	41.098	53.0705	76.6929
0.280789	0.550282	0.778217	1.03052	1.27894	1.52217	1.79271	2.20113	2.56344	2.96336	3.34724	3.89108	4.43652	5.36659	6.27418	7.41963	8.83542	10.953	13.9592	16.8259	20.2172	23.1446	27.5031	33.4995	41.1284	53.0907	76.7592
0.280992	0.550282	0.778217	1.03286	1.27998	1.52338	1.79973	2.20113	2.56929	2.96336	3.34724	3.89108	4.43652	5.36849	6.27418	7.43301	8.86012	10.9643	13.9928	16.8384	20.2291	23.1629	27.5064	33.5266	41.1573	53.1498	76.7872
0.281528	0.550282	0.778217	1.0421	1.28206	1.52856	1.81279	2.20113	2.56929	2.96336	3.34724	3.89108	4.45695	5.37477	6.27418	7.43646	8.90309	10.9753	14.0079	16.839	20.2695	23.1655	27.5141	33.5379	41.1601	53.3002	76.7967
0.281976	0.550282	0.778217	1.04409	1.28664	1.52907	1.82202	2.20113	2.56929	2.96336	3.34877	3.89108	4.45695	5.37477	6.28005	7.43969	8.9478	10.9794	14.0295	16.8498	20.2695	23.2164	27.5559	33.5841	41.1683	53.3121	76.9503
0.282693	0.550282	0.778217	1.04409	1.29081	1.53139	1.82508	2.20172	2.56929	2.96336	3.35358	3.89611	4.45695	5.3856	6.28335	7.44001	8.95795	11.0551	14.0295	16.8708	20.2892	23.2243	27.5827	33.6057	41.1772	53.3836	77.071
0.28316	0.550282	0.778217	1.04409	1.29206	1.53411	1.82569	2.20211	2.56929	2.97356	3.35603	3.92197	4.45695	5.39726	6.28865	7.44997	8.95795	11.0639	14.0295	16.9018	20.2934	23.2243	27.6557	33.6588	41.2002	53.4131	77.2946
0.284348	0.550282	0.778217	1.04409	1.29249	1.53624	1.82966	2.20259	2.57215	2.97356	3.37368	3.94518	4.47636	5.39726	6.28865	7.46595	8.98464	11.0663	14.0739	16.9031	20.3128	23.2347	27.7071	33.7248	41.2438	53.5586	77.3537
0.284675	0.550282	0.778217	1.04409	1.29358	1.5402	1.83345	2.20279	2.58305	2.97515	3.37876	3.94518	4.48992	5.40286	6.28865	7.47852	9.0253	11.0803	14.0812	16.909	20.3288	23.2659	27.7426	33.7622	41.2455	53.5857	77.493
0.284937	0.550282	0.778217	1.04409	1.29368	1.54156	1.83768	2.20745	2.5862	2.98138	3.38462	3.95093	4.49079	5.40286	6.29696	7.48465	9.0253	11.1179	14.1032	16.9112	20.3443	23.2699	27.7574	33.7685	41.2631	53.7323	77.7717
0.285541	0.550282	0.778217	1.04409	1.29578	1.54172	1.83989	2.20948	2.59615	2.98409	3.39085	3.95987	4.49079	5.40286	6.30308	7.48465	9.0253	11.1179	14.122	16.9631	20.3545	23.3115	27.7574	33.775	41.2919	53.7753	77.81
0.285666	0.550282	0.778217	1.04409	1.29636	1.54539	1.84071	2.21068	2.59861	2.98424	3.39371	3.96814	4.49079	5.4167	6.30308	7.48883	9.02866	11.1424	14.1327	16.9909	20.3545	23.3206	27.7907	33.783	41.3269	53.8107	77.8256
0.285803	0.550282	0.778217	1.04409	1.29678	1.55011	1.84119	2.21459	2.59894	2.98665	3.39884	3.96814	4.49079	5.43351	6.31327	7.49423	9.03536	11.1424	14.1477	17.0001	20.3604	23.3789	27.801	33.8684	41.3628	54.0532	77.8372
0.286553	0.550282	0.778217	1.04409	1.30183	1.55012	1.84433	2.21484	2.60833	2.98839	3.40767	3.96814	4.49204	5.44096	6.31622	7.49678	9.03536	11.1692	14.1488	17.0428	20.3961	23.439	27.8304	33.9038	41.3664	54.0645	78.0804
0.286801	0.550282	0.778217	1.04409	1.30625	1.55473	1.84605	2.21484	2.6098	2.98933	3.41533	3.96814	4.50185	5.44752	6.32705	7.50009	9.05242	11.2263	14.2182	17.0486	20.4199	23.4592	27.8652	33.9083	41.4023	54.1159	78.156
0.286989	0.550282	0.778217	1.04409	1.31042	1.55643	1.84771	2.21484	2.60996	2.99386	3.41884	3.96814	4.51768	5.46417	6.32705	7.50081	9.05545	11.2263	14.2182	17.0537	20.4273	23.5351	27.9403	33.9283	41.403	54.3148	78.1945
0.287136	0.550282	0.778217	1.04409	1.31251	1.55643	1.85302	2.21797	2.6231	2.99386	3.41884	3.96814	4.51768	5.46417	6.33769	7.51292	9.05685	11.2344	14.2246	17.0579	20.4317	23.5441	27.9909	34.0153	41.4734	54.3956	78.3189
0.287199	0.550282	0.778217	1.04409	1.31547	1.55643	1.85931	2.2199	2.62453	2.99386	3.42156	3.96814	4.51768	5.47743	6.34092	7.52902	9.07549	11.2721	14.2586	17.0942	20.4391	23.5698	27.9959	34.0873	41.5089	54.4668	78.3603
0.287473	0.550282	0.778217	1.04409	1.31937	1.55643	1.86623	2.22058	2.62713	2.99386	3.42962	3.96814	4.52438	5.48463	6.37859	7.54769	9.07883	11.363	14.2925	17.1798	20.4672	23.5762	28.0082	34.1032	41.5928	54.479	78.5135
0.287726	0.550282	0.778217	1.04409	1.32175	1.55643	1.87419	2.22415	2.63081	2.99647	3.44531	3.96814	4.52438	5.4855	6.38897	7.5491	9.07883	11.3717	14.3073	17.187	20.4717	23.6365	28.0428	34.137	41.6191	54.5151	78.5189
0.288148	0.550282	0.778217	1.04409	1.325	1.55643	1.87419	2.22847	2.63501	2.99678	3.44531	3.97305	4.52438	5.48846	6.39844	7.5491	9.07883	11.379	14.3217	17.2283	20.4785	23.6506	28.044	34.1512	41.6328	54.609	78.5224
0.288263	0.550282	0.778217	1.04409	1.32526	1.55643	1.87419	2.22847	2.64175	3.00095	3.4467	3.97577	4.52643	5.49075	6.40317	7.55361	9.09693	11.379	14.339	17.2494	20.4791	23.6762	28.0525	34.17	41.6667	54.6583	78.6211
0.288634	0.550282	0.778217	1.04409	1.32526	1.55643	1.87419	2.22847	2.6455	3.00396	3.45171	3.97577	4.53273	5.49733	6.40317	7.5679	9.11204	11.4188	14.5216	17.2547	20.485	23.6877	28.0609	34.1885	41.6792	54.6949	78.6842
0.288854	0.550282	0.778217	1.04422	1.32526	1.55643	1.87419	2.22847	2.64576	3.00646	3.45409	3.97577	4.53774	5.50282	6.40632	7.57585	9.12146	11.4774	14.5216	17.2575	20.4948	23.689	28.0644	34.2413	41.7011	54.7618	78.8411
0.289432	0.550282	0.778217	1.04454	1.32526	1.55643	1.87419	2.22847	2.64929	3.01571	3.45409	3.97577	4.53774	5.50282	6.41492	7.58113	9.13203	11.4797	14.5383	17.2665	20.5216	23.7069	28.0941	34.2672	41.7332	54.7823	78.8683
0.289941	0.550282	0.778217	1.04727	1.32526	1.55643	1.87419	2.22847	2.64951	3.02388	3.45409	3.97601	4.53774	5.50282	6.42503	7.58113	9.15852	11.485	14.5529	17.3082	20.5503	23.7082	28.0989	34.3168	41.7791	54.7922	78.9685
0.290213	0.550282	0.778217	1.04879	1.32526	1.56118	1.87419	2.22847	2.65051	3.02397	3.45409	3.97813	4.5556	5.50435	6.42675	7.58113	9.15852	11.5279	14.5529	17.3107	20.5656	23.7235	28.1075	34.321	41.8251	54.8044	79.0589
0.29069	0.550282	0.778217	1.04989	1.32526	1.56128	1.87419	2.22847	2.65051	3.04071	3.45409	3.99205	4.59741	5.53027	6.43613	7.58113	9.15852	11.569	14.5582	17.3387	20.5773	23.7949	28.1248	34.3343	41.854	54.9511	79.0674
0.291683	0.550282	0.778217	1.05219	1.32526	1.56318	1.87419	2.22847	2.65051	3.04095	3.45893	4.00612	4.60507	5.53027	6.45099	7.59709	9.16549	11.569	14.5716	17.3753	20.5853	23.829	28.1377	34.3442	41.854	55.097	79.1321
0.291976	0.550282	0.778217	1.05354	1.32526	1.56503	1.87419	2.22847	2.65051	3.04269	3.46332	4.00612	4.61866	5.53027	6.45967	7.60107	9.17122	11.5899	14.6495	17.4412	20.5912	23.8724	28.1377	34.3776	41.8675	55.0997	79.2426
0.292797	0.550282	0.778217	1.05728	1.32526	1.56558	1.87419	2.22847	2.65051	3.04401	3.4678	4.00612	4.6239	5.5465	6.45967	7.61221	9.18823	11.6185	14.6567	17.466	20.6132	23.8762	28.1377	34.3965	41.8964	55.1217	79.3036
0.293321	0.550282	0.778217	1.05849	1.32526	1.56581	1.87419	2.22847	2.65888	3.04401	3.47791	4.0149	4.64329	5.54809	6.47372	7.62891	9.18823	11.6914	14.6622	17.4744	20.6264	23.8914	28.1377	34.4083	41.8983	55.1744	79.3876
0.293744	0.550282	0.778217	1.06138	1.32526	1.56738	1.87419	2.22876	2.66191	3.04401	3.47974	4.02846	4.6693	5.55213	6.47372	7.6408	9.2378	11.6914	14.7015	17.5655	20.6321	23.9319	28.1495	34.4275	41.9205	55.1789	79.4927
0.294314	0.550282	0.778217	1.06141	1.32526	1.56803	1.87419	2.23683	2.66191	3.04401	3.48029	4.03345	4.6693	5.56746	6.49706	7.6408	9.24076	11.6992	14.7203	17.5712	20.6403	23.937	28.1753	34.4392	41.9473	55.2589	79.5351
0.294799	0.550282	0.778217	1.06182	1.32526	1.56975	1.87419	2.23812	2.66191	3.04401	3.48029	4.03624	4.67959	5.57416	6.49983	7.64477	9.24736	11.8253	14.7317	17.5763	20.6471	23.9433	28.1925	34.4948	41.9963	55.3359	79.6219
0.294817	0.550282	0.778217	1.06273	1.32526	1.57577	1.87677	2.26087	2.66191	3.04401	3.48029	4.03624	4.68093	5.6118	6.50172	7.64477	9.25064	11.8381	14.7513	17.5796	20.6909	23.9434	28.4076	34.583	42.0424	55.3667	79.6865
0.295145	0.550282	0.778217	1.06413	1.32526	1.57577	1.87725	2.26381	2.66191	3.04401	3.48029	4.03646	4.69177	5.6126	6.50172	7.66455	9.27679	11.879	14.7625	17.5927	20.7022	23.9465	28.4842	34.6068	42.1137	55.441	79.7211
0.295315	0.550282	0.77936	1.06524	1.32526	1.57577	1.88035	2.26878	2.66191	3.04401	3.48029	4.04859	4.70161	5.61719	6.53887	7.68821	9.28148	11.8866	14.7738	17.6125	20.7085	23.962	28.5146	34.6328	42.1625	55.4782	79.7909
0.296074	0.550282	0.782252	1.06964	1.32526	1.57577	1.88108	2.26887	2.66386	3.04401	3.48029	4.05868	4.70161	5.61719	6.53887	7.69215	9.28658	11.8942	14.7738	17.7457	20.7143	23.9636	28.5182	34.6834	42.1805	55.4913	79.8452
0.296076	0.550282	0.784393	1.07144	1.32526	1.57577	1.8824	2.26887	2.66681	3.04401	3.48029	4.05868	4.70161	5.61719	6.54589	7.69443	9.31588	12.0083	14.7738	17.763	20.7232	23.9825	28.5341	34.7429	42.2246	55.4913	79.9229
0.297388	0.550282	0.784393	1.07249	1.32526	1.57577	1.8829	2.26887	2.6676	3.04401	3.48029	4.05868	4.70161	5.62258	6.55002	7.70394	9.33885	12.0158	14.7738	17.7768	20.7479	23.9938	28.5678	34.7492	42.2387	55.5802	80.0013
0.297698	0.550282	0.784393	1.0732	1.32526	1.57577	1.89196	2.26887	2.67177	3.05334	3.48455	4.05868	4.7029	5.62258	6.55275	7.70963	9.34539	12.0183	14.7784	17.7802	20.7654	23.9941	28.5959	34.7494	42.24	55.6199	80.1563
0.297716	0.550282	0.784393	1.07474	1.32526	1.57577	1.89582	2.26887	2.6756	3.05528	3.48588	4.06264	4.70645	5.62707	6.55275	7.71674	9.3548	12.0611	14.7841	17.7802	20.7995	24.0151	28.601	34.8025	42.2519	55.7594	80.409
0.298177	0.550282	0.787265	1.0768	1.32526	1.57577	1.90509	2.26887	2.68643	3.05736	3.49765	4.06621	4.71006	5.64511	6.5666	7.72358	9.36451	12.0686	14.8066	17.804	20.8018	24.0228	28.6992	34.8029	42.2742	55.8025	80.6384
0.298284	0.550282	0.792948	1.07923	1.32526	1.57577	1.90591	2.26887	2.6883	3.05879	3.49765	4.07202	4.72731	5.64928	6.5666	7.7275	9.37097	12.118	14.8095	17.8992	20.8178	24.0241	28.7719	34.8548	42.2843	56.0538	80.9323
0.29844	0.550282	0.79334	1.08028	1.32526	1.57577	1.9077	2.26887	2.69765	3.06295	3.49765	4.0723	4.72731	5.6655	6.5666	7.7275	9.43737	12.1187	14.8168	17.9311	20.8215	24.048	28.8361	34.8894	42.2988	56.201	80.9458
0.298482	0.550282	0.796535	1.0817	1.32526	1.57577	1.91479	2.26887	2.69852	3.06642	3.50154	4.07358	4.72731	5.66721	6.60339	7.7275	9.44152	12.1194	14.8371	17.9376	20.8241	24.0833	28.8602	34.9097	42.4085	56.3039	80.9719
0.298505	0.550282	0.799802	1.08284	1.32526	1.57577	1.91518	2.26887	2.69949	3.06817	3.50558	4.07358	4.72748	5.66798	6.61255	7.77049	9.46888	12.1586	14.8576	17.9421	20.8539	24.0931	28.9105	34.9299	42.4238	56.3963	81.0908
0.299136	0.550282	0.800703	1.08357	1.32526	1.57577	1.9184	2.26887	2.70324	3.07955	3.50592	4.0766	4.72813	5.68002	6.62628	7.77049	9.49616	12.181	14.8576	17.9446	20.8846	24.1117	28.9173	34.9462	42.435	56.4328	81.1039
0.301614	0.550282	0.801623	1.0856	1.32775	1.57577	1.91933	2.26887	2.70347	3.08355	3.50637	4.07728	4.73371	5.68152	6.62628	7.77049	9.50572	12.2074	14.8739	17.9648	20.8948	24.141	28.9673	35.0194	42.4671	56.4719	81.1666
0.301653	0.550282	0.806562	1.08929	1.32846	1.57577	1.92205	2.26887	2.70703	3.08355	3.51613	4.07929	4.73371	5.68152	6.62628	7.78217	9.5089	12.2183	14.8911	17.9665	20.918	24.2087	28.989	35.0364	42.5002	56.5063	81.1811
0.302183	0.550282	0.807044	1.09107	1.33747	1.57577	1.92205	2.26887	2.70703	3.08355	3.52251	4.09582	4.74823	5.68152	6.62628	7.78217	9.51102	12.2405	14.9715	18.0053	20.97	24.2387	29.0228	35.05	42.5002	56.5957	81.2143
0.302433	0.550282	0.807343	1.0922	1.34156	1.57577	1.92205	2.26887	2.70703	3.08355	3.52331	4.09582	4.75286	5.69427	6.62628	7.78217	9.52542	12.2603	14.9785	18.0119	20.9759	24.2387	29.0331	35.101	42.5717	56.7062	81.3158
0.302514	0.550282	0.809121	1.09452	1.35281	1.57577	1.92205	2.26887	2.71098	3.08355	3.52353	4.10402	4.75286	5.69524	6.62633	7.80152	9.57238	12.2998	15.0198	18.0254	21.0104	24.2474	29.0651	35.1509	42.6645	56.8152	81.3425
0.304034	0.550282	0.809551	1.10056	1.36335	1.57577	1.92205	2.26956	2.71544	3.09165	3.52353	4.11563	4.77828	5.70324	6.64048	7.81394	9.58503	12.3163	15.0258	18.0401	21.0104	24.2686	29.0774	35.1724	42.6759	56.9435	81.386
0.305403	0.550282	0.809952	1.10056	1.36468	1.57883	1.92205	2.27468	2.71819	3.10009	3.52353	4.11655	4.77828	5.70702	6.64909	7.82098	9.61027	12.344	15.0359	18.0707	21.0104	24.2849	29.1057	35.2224	42.7021	57.0879	81.4436
0.305625	0.550282	0.81213	1.10056	1.36703	1.58603	1.92456	2.27532	2.71819	3.10066	3.52353	4.12528	4.77828	5.7081	6.66274	7.82098	9.62601	12.3661	15.044	18.0833	21.0164	24.3139	29.1163	35.2371	42.7055	57.0985	81.5862
0.305829	0.550282	0.814973	1.10056	1.36868	1.58827	1.92666	2.27794	2.71819	3.11246	3.52353	4.12528	4.77828	5.71458	6.67583	7.83259	9.64835	12.4048	15.0562	18.0952	21.0392	24.3943	29.1224	35.2636	42.7963	57.1833	81.6534
0.30618	0.550282	0.820121	1.10056	1.37693	1.58827	1.92666	2.28608	2.71819	3.11287	3.52353	4.12528	4.79058	5.71757	6.68542	7.84393	9.65114	12.4185	15.0781	18.1224	21.0392	24.4298	29.2006	35.283	42.8804	57.1918	81.6664
0.30633	0.550282	0.820361	1.10056	1.37705	1.59394	1.92936	2.29326	2.71971	3.11287	3.52353	4.13582	4.79058	5.72399	6.69447	7.8667	9.65114	12.4228	15.0842	18.1276	21.0565	24.4365	29.2116	35.3347	42.9312	57.2496	81.7661
0.308259	0.550282	0.820384	1.10056	1.37755	1.596	1.93576	2.29509	2.72961	3.11287	3.54921	4.13801	4.79087	5.72399	6.69447	7.875	9.6699	12.4246	15.0856	18.1326	21.0694	24.4427	29.2441	35.4561	42.9361	57.3589	81.7876
0.308449	0.550282	0.820673	1.10056	1.37913	1.60249	1.93731	2.29751	2.73395	3.11287	3.54921	4.15708	4.8122	5.73984	6.69447	7.8762	9.68559	12.4767	15.0891	18.1433	21.0724	24.4472	29.2714	35.4872	43.0045	57.4038	82.1378
0.308593	0.550282	0.821517	1.10056	1.38265	1.60297	1.94037	2.32164	2.73763	3.11287	3.54921	4.17635	4.83202	5.73984	6.69447	7.87884	9.69165	12.4952	15.1102	18.1453	21.091	24.4676	29.311	35.5135	43.0167	57.4812	82.1776
0.309284	0.550282	0.822843	1.10056	1.38449	1.61536	1.94577	2.32164	2.73859	3.1263	3.55149	4.18106	4.83498	5.73984	6.70375	7.87884	9.70745	12.4952	15.1329	18.1553	21.091	24.4761	29.3383	35.5242	43.0945	57.4923	82.3727
0.310674	0.550282	0.824987	1.10056	1.39026	1.6186	1.94673	2.32164	2.73932	3.13156	3.57283	4.18359	4.85373	5.74512	6.71705	7.89037	9.73549	12.5315	15.1742	18.1577	21.091	24.5136	29.3389	35.6046	43.1001	57.5428	82.4341
0.311287	0.550282	0.825632	1.10056	1.39212	1.62023	1.94829	2.32164	2.74016	3.13226	3.58318	4.19083	4.85373	5.74512	6.71705	7.89037	9.73549	12.5315	15.1802	18.1593	21.1354	24.5454	29.375	35.6136	43.2842	57.5507	82.4359
0.311472	0.550282	0.828754	1.10056	1.39212	1.62172	1.96792	2.32164	2.74109	3.13377	3.58318	4.19083	4.87677	5.74512	6.72156	7.89627	9.73549	12.5343	15.2207	18.1831	21.1426	24.5655	29.3843	35.6562	43.3463	57.669	82.4858
0.312584	0.550282	0.829382	1.10056	1.39212	1.62605	1.96875	2.32164	2.74805	3.14443	3.58318	4.19083	4.88482	5.74512	6.72156	7.90953	9.75103	12.5484	15.2671	18.2209	21.1955	24.6101	29.4368	35.6584	43.347	57.7796	82.524
0.31266	0.550282	0.837521	1.10056	1.39212	1.62803	1.96875	2.32164	2.74958	3.14655	3.58318	4.19083	4.88751	5.76091	6.72156	7.90953	9.75103	12.5512	15.2696	18.2368	21.1998	24.6408	29.4378	35.6591	43.4493	57.7804	82.6116
0.312918	0.550282	0.837796	1.10056	1.39212	1.63247	1.96875	2.32494	2.75109	3.14999	3.58356	4.19764	4.89493	5.76091	6.73578	7.93628	9.76571	12.6062	15.3073	18.2375	21.2036	24.6415	29.4467	35.687	43.5436	57.8116	82.6615
0.312983	0.550282	0.838621	1.10056	1.39212	1.63316	1.96875	2.32805	2.75141	3.15154	3.59152	4.20464	4.90338	5.76091	6.74779	7.95153	9.76964	12.6103	15.3172	18.2501	21.2155	24.6536	29.4594	35.7321	43.5593	57.9331	82.8339
0.313282	0.550282	0.841514	1.10056	1.39217	1.63428	1.96875	2.33261	2.75141	3.1562	3.59524	4.20464	4.90338	5.77815	6.7575	7.95538	9.77898	12.6158	15.3232	18.2848	21.2626	24.6716	29.4835	35.7853	43.5836	57.9785	82.9055
0.313393	0.550282	0.841678	1.10056	1.39837	1.63502	1.96875	2.33414	2.75141	3.15712	3.60267	4.20525	4.91059	5.79236	6.7575	7.96999	9.82528	12.648	15.3291	18.2907	21.2626	24.6794	29.4953	35.8461	43.6024	57.9785	82.9073
0.313863	0.550282	0.842674	1.10056	1.3994	1.64152	1.96875	2.33462	2.75141	3.15948	3.60527	4.20525	4.92692	5.79236	6.7575	7.97055	9.83452	12.6852	15.3291	18.3191	21.264	24.688	29.5001	35.874	43.6192	58.1407	83.3237
0.314364	0.550282	0.843183	1.10056	1.39955	1.64538	1.96875	2.33465	2.75141	3.16829	3.62322	4.20525	4.92802	5.79236	6.7575	7.97261	9.83452	12.7212	15.3333	18.3231	21.264	24.7137	29.5221	35.9263	43.6201	58.1723	83.372
0.314904	0.550282	0.84338	1.10056	1.40314	1.64913	1.97298	2.33465	2.75141	3.17039	3.63138	4.21245	4.93725	5.80802	6.7888	7.98573	9.842	12.7578	15.3356	18.3235	21.3322	24.7389	29.5241	35.9751	43.7085	58.1769	83.6809
0.315179	0.550282	0.84705	1.10056	1.40915	1.65065	1.97341	2.33465	2.75141	3.17045	3.63353	4.21245	4.93767	5.83279	6.80662	8.01722	9.84375	12.7686	15.3714	18.3253	21.3365	24.7517	29.5297	35.9979	43.7162	58.2549	83.7533
0.31642	0.550282	0.848561	1.10056	1.4124	1.65085	1.97609	2.33465	2.75927	3.17831	3.63353	4.21245	4.93979	5.83403	6.80662	8.01962	9.87646	12.7779	15.3896	18.3264	21.3548	24.7725	29.5424	36.0214	43.8424	58.3179	84.2867
0.318636	0.550282	0.848921	1.10056	1.41739	1.65085	1.97819	2.33465	2.76638	3.18147	3.63353	4.2168	4.94642	5.83833	6.80662	8.02543	9.90508	12.7898	15.402	18.3596	21.3983	24.7857	29.5497	36.0282	43.9474	58.4736	84.3316
0.319082	0.550282	0.84922	1.10056	1.42345	1.65085	1.98017	2.33465	2.76783	3.18524	3.63905	4.2329	4.94642	5.84958	6.83951	8.03187	9.92036	12.79	15.4177	18.3655	21.4102	24.8079	29.5637	36.0508	43.9524	58.5103	84.4618
0.319908	0.550282	0.852446	1.10056	1.42404	1.65085	1.98026	2.33465	2.76968	3.18571	3.64524	4.2339	4.94642	5.84958	6.85481	8.03381	9.92036	12.8051	15.4284	18.3715	21.4328	24.8483	29.5725	36.0581	43.9524	58.5584	84.4822
0.319991	0.550282	0.852596	1.10056	1.42719	1.65085	1.98407	2.33465	2.77325	3.18928	3.65345	4.23396	4.94904	5.85122	6.85538	8.03488	9.92036	12.8086	15.4448	18.3839	21.461	24.8604	29.7049	36.0895	43.962	58.696	84.7453
0.32022	0.550282	0.854689	1.10056	1.42774	1.65085	1.98407	2.33465	2.77517	3.19773	3.65845	4.23396	4.95254	5.8673	6.89088	8.03488	9.92036	12.818	15.5059	18.4061	21.4782	24.9042	29.7132	36.092	44.057	58.7025	84.7656
0.320543	0.550282	0.857871	1.10056	1.43324	1.65085	1.98407	2.33465	2.77815	3.19922	3.65845	4.23396	4.95254	5.87025	6.89502	8.04281	9.92036	12.8347	15.51	18.411	21.4793	24.9139	29.7266	36.1498	44.0651	58.7721	84.9119
0.321535	0.550282	0.860477	1.10056	1.43496	1.65085	1.98407	2.33479	2.78121	3.19922	3.65845	4.23863	4.95254	5.87805	6.90748	8.04617	9.92036	12.8401	15.526	18.4293	21.4892	24.9151	29.7601	36.2251	44.0868	58.9974	85.1932
0.32177	0.550282	0.861252	1.10056	1.43496	1.65085	1.98407	2.33865	2.78423	3.19922	3.66237	4.23987	4.96285	5.88929	6.91551	8.06121	9.95692	12.8465	15.5351	18.4439	21.5005	24.9544	29.8575	36.3353	44.0941	59.2102	85.2867
0.322339	0.550282	0.862755	1.10056	1.43496	1.65085	1.98407	2.34734	2.78687	3.19922	3.66237	4.24326	4.97694	5.89477	6.93006	8.06121	9.97211	12.8666	15.5353	18.4636	21.5005	25.0024	29.891	36.3395	44.1229	59.2693	85.4163
0.323063	0.550282	0.864379	1.10056	1.43496	1.65085	1.98407	2.35318	2.78738	3.19922	3.66869	4.24824	4.97694	5.9072	6.93006	8.06121	9.97211	12.8818	15.5409	18.5095	21.523	25.0024	29.8991	36.3738	44.2011	59.3591	85.4215
0.323077	0.550282	0.865449	1.10056	1.43496	1.65085	1.98407	2.35318	2.79285	3.19922	3.6688	4.24824	4.97694	5.92252	6.93006	8.07366	9.99335	12.8818	15.5527	18.5105	21.5272	25.0055	29.9076	36.3889	44.2052	59.38	85.6668
0.323378	0.550282	0.865643	1.10056	1.43496	1.65085	1.98407	2.35318	2.79304	3.19922	3.67534	4.24824	4.98302	5.92672	6.94655	8.09803	10.0176	12.9146	15.5838	18.516	21.568	25.069	29.934	36.4265	44.2161	59.3838	86.1434
0.323427	0.550282	0.865647	1.10056	1.43496	1.65085	1.98407	2.3599	2.80182	3.19949	3.68908	4.24824	4.98302	5.93587	6.96058	8.11736	10.0176	12.9193	15.5896	18.5274	21.568	25.0951	29.9639	36.4348	44.3341	59.3848	86.2147
0.323459	0.550282	0.867108	1.10056	1.43496	1.65085	1.98407	2.36258	2.8059	3.19981	3.69141	4.24824	4.98555	5.94356	6.97845	8.12109	10.0176	12.9474	15.6223	18.6591	21.5736	25.1028	29.9639	36.4531	44.3697	59.3923	86.3367
0.323769	0.550282	0.869909	1.10221	1.43496	1.65085	1.98407	2.37256	2.8059	3.20542	3.69141	4.24824	5.00771	5.94712	6.98634	8.12144	10.0176	12.969	15.6284	18.6946	21.5736	25.1462	29.9707	36.4759	44.537	59.4957	86.3803
0.324859	0.550282	0.870432	1.10357	1.43496	1.65085	1.98407	2.37304	2.8059	3.20867	3.69141	4.24824	5.0098	5.95221	6.99028	8.12482	10.0417	13.0026	15.6503	18.7096	21.5806	25.1462	30.0014	36.5098	44.5532	59.5349	86.3856
0.325671	0.550282	0.872189	1.10568	1.43496	1.65085	1.98407	2.37676	2.8059	3.20867	3.69141	4.27645	5.01935	5.95221	6.9953	8.12482	10.0447	13.0801	15.6961	18.7347	21.589	25.151	30.0295	36.519	44.5769	59.5496	86.4854
0.325872	0.550282	0.872721	1.10577	1.43496	1.65085	1.98407	2.3831	2.8059	3.20867	3.69741	4.27791	5.01935	5.97714	6.9953	8.12482	10.0928	13.0801	15.7038	18.7362	21.589	25.1689	30.0325	36.5787	44.6044	59.6766	86.491
0.327124	0.550282	0.87498	1.10616	1.43496	1.65312	1.98407	2.3867	2.8059	3.20867	3.6996	4.2822	5.04789	5.98772	7.00395	8.12482	10.1018	13.0824	15.7231	18.7419	21.602	25.1785	30.0405	36.5845	44.6552	59.7233	86.639
0.327159	0.550282	0.875881	1.10764	1.43496	1.65368	1.98407	2.39157	2.8059	3.20867	3.6996	4.29784	5.04932	5.98772	7.00395	8.14715	10.1258	13.1203	15.7519	18.8386	21.6031	25.1799	30.0456	36.6242	44.7119	59.7378	86.7107
0.327194	0.550987	0.876656	1.1093	1.43496	1.66395	1.98407	2.39471	2.8059	3.20867	3.69975	4.29784	5.04942	5.99277	7.0053	8.16106	10.1348	13.1263	15.7673	18.8581	21.6541	25.1799	30.0622	36.6627	44.7157	59.829	86.8304
0.32731	0.552185	0.877348	1.1093	1.43496	1.66395	1.98407	2.39739	2.8059	3.22185	3.71824	4.29784	5.06738	5.99277	7.01583	8.18054	10.1377	13.1263	15.8363	18.8643	21.6562	25.1961	30.0699	36.668	44.723	59.912	86.8432
0.327983	0.552843	0.880779	1.1093	1.43496	1.66395	1.98407	2.39826	2.8059	3.23139	3.72407	4.29784	5.06954	5.99277	7.04355	8.19163	10.1467	13.1468	15.8668	18.8659	21.6744	25.2082	30.0925	36.6726	44.736	59.9197	86.854
0.32854	0.554066	0.881915	1.1093	1.43496	1.67126	1.98895	2.39893	2.8059	3.23414	3.72407	4.29784	5.07335	5.99432	7.04705	8.24246	10.1467	13.1565	15.9069	18.874	21.6856	25.2123	30.105	36.6754	44.7544	59.9429	87.0636
0.329794	0.55465	0.883708	1.11038	1.43496	1.67589	1.99374	2.40117	2.8059	3.23686	3.7347	4.29784	5.07335	6.00791	7.05135	8.24522	10.1527	13.1631	15.9233	18.8797	21.6856	25.2147	30.1506	36.6754	44.7674	59.9565	87.7134
0.330604	0.55465	0.884452	1.11039	1.43496	1.68188	1.99404	2.40664	2.8059	3.23686	3.74839	4.29887	5.07335	6.02063	7.05135	8.25424	10.1998	13.1631	15.9244	18.8829	21.6887	25.2747	30.201	36.7274	44.8384	60.0649	88.0648
0.330722	0.55465	0.885848	1.11387	1.43496	1.6831	1.99576	2.40842	2.8067	3.23686	3.74839	4.30102	5.07335	6.03306	7.05727	8.27256	10.2031	13.1681	15.9792	18.9108	21.7065	25.2789	30.2232	36.7603	44.8806	60.0953	88.1706
0.331401	0.55465	0.887304	1.11513	1.43496	1.68365	1.99641	2.41408	2.80897	3.23686	3.74839	4.30488	5.08598	6.03306	7.07708	8.27256	10.2279	13.2066	15.983	18.9168	21.7235	25.2848	30.2251	36.7809	44.9262	60.1602	88.1885
0.332066	0.55465	0.887304	1.11787	1.43496	1.68406	1.99982	2.41461	2.81079	3.23686	3.74839	4.30488	5.1066	6.03306	7.08128	8.27256	10.2295	13.2182	15.986	18.9556	21.7897	25.3238	30.2615	36.7867	44.9941	60.299	88.217
0.332214	0.55465	0.887304	1.12012	1.43496	1.68528	2.00077	2.41997	2.8153	3.2467	3.75299	4.3158	5.10954	6.03585	7.11808	8.32728	10.2772	13.2284	15.9928	18.9719	21.7923	25.3369	30.2624	36.8262	45.0073	60.3497	88.2367
0.332355	0.55465	0.887304	1.12067	1.43496	1.6859	2.00364	2.42178	2.82395	3.24739	3.75646	4.32405	5.12088	6.03907	7.14185	8.32728	10.2801	13.2297	15.9961	18.9812	21.7943	25.3369	30.2696	36.8596	45.0076	60.3584	88.3806
0.332665	0.55465	0.887304	1.12317	1.43496	1.69316	2.0048	2.42337	2.82696	3.2626	3.75646	4.32899	5.1339	6.0499	7.14478	8.32728	10.2801	13.2297	16.0131	18.9883	21.8044	25.3815	30.2735	36.9123	45.0106	60.467	88.398
0.332681	0.55465	0.887304	1.12417	1.43496	1.70307	2.00505	2.42374	2.82712	3.2833	3.75646	4.3407	5.13859	6.07216	7.15367	8.33347	10.2801	13.2637	16.028	18.9891	21.8151	25.409	30.2895	36.9346	45.062	60.5461	88.4056
0.332984	0.55532	0.887304	1.12582	1.43496	1.71234	2.00595	2.42374	2.82774	3.2833	3.75646	4.34071	5.14117	6.07807	7.15367	8.3527	10.2801	13.2891	16.0389	18.9923	21.8248	25.445	30.2945	36.9518	45.0896	60.671	88.4223
0.333787	0.55535	0.887304	1.12902	1.4371	1.71272	2.00792	2.42374	2.83263	3.2833	3.75772	4.34086	5.17382	6.07807	7.15367	8.35843	10.3066	13.292	16.0433	19.0028	21.8248	25.4621	30.3571	36.987	45.1114	60.6997	88.4952
0.333823	0.5554	0.887304	1.13352	1.44098	1.7128	2.01798	2.42374	2.84406	3.2833	3.76154	4.34447	5.17382	6.07807	7.15367	8.35995	10.3476	13.3096	16.0584	19.0238	21.9686	25.4656	30.3764	36.996	45.1741	60.7149	88.7336
0.334175	0.555634	0.887304	1.13447	1.44282	1.71407	2.01858	2.42374	2.84846	3.2833	3.76445	4.34939	5.17382	6.09267	7.16274	8.3997	10.3617	13.3209	16.0867	19.0386	21.9906	25.4818	30.399	37.0026	45.207	60.7673	88.8759
0.334448	0.557233	0.887304	1.13485	1.44354	1.71468	2.02183	2.42374	2.8506	3.2942	3.76451	4.36079	5.17382	6.09299	7.1748	8.3997	10.3744	13.3255	16.0894	19.0434	22.0388	25.4918	30.4451	37.0208	45.2558	60.958	88.8899
0.334634	0.559395	0.887304	1.13679	1.44354	1.7173	2.02878	2.42374	2.85154	3.29974	3.76451	4.36079	5.18774	6.09299	7.1748	8.3997	10.3884	13.37	16.0922	19.0655	22.0731	25.5298	30.5097	37.0244	45.2583	60.9621	88.9829
0.335181	0.559587	0.887304	1.14213	1.44635	1.72171	2.02934	2.42374	2.85272	3.30011	3.76451	4.37367	5.19135	6.09299	7.1748	8.3997	10.4461	13.4003	16.0923	19.0655	22.0887	25.5333	30.5575	37.0486	45.2772	61.0536	89.4729
0.335635	0.560234	0.887304	1.14397	1.45005	1.72266	2.02934	2.42374	2.86355	3.30169	3.76617	4.37679	5.21598	6.11284	7.19724	8.4105	10.4753	13.4544	16.1152	19.0734	22.0985	25.5698	30.5642	37.0622	45.3749	61.082	89.8387
0.336454	0.560439	0.887304	1.14417	1.45184	1.72266	2.02934	2.42374	2.86431	3.30169	3.77444	4.3827	5.22044	6.11676	7.21665	8.41142	10.4759	13.4592	16.1318	19.0754	22.1082	25.5832	30.6463	37.0928	45.3785	61.1725	90.1688
0.336706	0.56198	0.887304	1.14743	1.4527	1.72266	2.02934	2.4362	2.8697	3.30169	3.81453	4.38281	5.22902	6.12497	7.23783	8.42489	10.5333	13.4789	16.1487	19.0857	22.126	25.5881	30.6582	37.1109	45.4448	61.2722	90.255
0.336731	0.563767	0.887304	1.14841	1.45284	1.72266	2.02934	2.43771	2.86992	3.30331	3.8204	4.38641	5.23202	6.13634	7.24202	8.46257	10.5677	13.515	16.1506	19.1122	22.1291	25.6296	30.6681	37.121	45.4555	61.2733	90.3923
0.3369	0.565025	0.887304	1.14906	1.4556	1.72266	2.02934	2.44084	2.87092	3.30535	3.8226	4.39737	5.26088	6.15234	7.25554	8.46824	10.5849	13.5537	16.1843	19.1416	22.1341	25.6434	30.6888	37.2139	45.4618	61.3269	90.4266
0.337368	0.565651	0.887304	1.14956	1.45571	1.72266	2.02934	2.44389	2.8725	3.30584	3.82359	4.40025	5.26088	6.15234	7.26706	8.47506	10.5935	13.5553	16.1843	19.1463	22.1348	25.6728	30.7594	37.2459	45.4684	61.3585	91.2911
0.33827	0.566549	0.887304	1.14976	1.45777	1.72266	2.02934	2.44791	2.87309	3.31085	3.82543	4.42849	5.26187	6.15234	7.26859	8.47919	10.616	13.5709	16.2067	19.1543	22.1389	25.6929	30.7788	37.2578	45.4714	61.455	91.4718
0.33894	0.566708	0.887304	1.15009	1.46169	1.72266	2.02934	2.44848	2.88045	3.31085	3.82832	4.42969	5.26664	6.172	7.27123	8.48577	10.6277	13.5731	16.2291	19.1701	22.1443	25.7253	30.7863	37.3881	45.4761	61.5021	91.69
0.339152	0.567011	0.887304	1.15082	1.46253	1.72266	2.02934	2.44866	2.88045	3.31085	3.83216	4.42969	5.26664	6.172	7.27123	8.50004	10.6634	13.6063	16.2394	19.178	22.2003	25.7471	30.8397	37.3949	45.5014	61.5397	92.0512
0.339256	0.567794	0.887304	1.15159	1.46363	1.72266	2.03273	2.4503	2.88045	3.31647	3.84411	4.43652	5.27374	6.17783	7.28787	8.51658	10.6846	13.6155	16.2422	19.1953	22.2118	25.7471	30.86	37.4218	45.509	61.7126	92.1486
0.339984	0.567887	0.887304	1.15259	1.46488	1.72787	2.0383	2.45262	2.88045	3.33237	3.84411	4.43652	5.27393	6.20319	7.28901	8.54268	10.6846	13.6542	16.2422	19.2193	22.2412	25.7472	30.8922	37.4718	45.5273	61.7766	92.1861
0.340203	0.569153	0.887304	1.15328	1.46526	1.7332	2.04545	2.45768	2.88045	3.33486	3.85198	4.43652	5.28386	6.22573	7.29528	8.56038	10.7861	13.7152	16.2962	19.2241	22.2535	25.7553	30.9055	37.4839	45.5672	61.8732	92.2245
0.340506	0.569161	0.887304	1.15863	1.46807	1.73589	2.04545	2.46039	2.88045	3.3372	3.85198	4.43652	5.28386	6.22692	7.30447	8.56038	10.7861	13.7235	16.3017	19.2467	22.2535	25.76	30.9355	37.4839	45.6038	61.8839	92.2988
0.340888	0.569541	0.887304	1.16869	1.46847	1.73682	2.04698	2.46094	2.88806	3.34117	3.88239	4.43652	5.28386	6.2306	7.30447	8.56038	10.8045	13.769	16.3304	19.3023	22.2901	25.7871	30.9384	37.4855	45.6038	61.8949	92.5064
0.341191	0.57125	0.887304	1.16926	1.46898	1.73774	2.04824	2.46094	2.8927	3.3437	3.88767	4.43652	5.29274	6.2306	7.30447	8.57099	10.8055	13.7781	16.3441	19.4149	22.301	25.8023	30.9384	37.5005	45.6138	61.9241	92.8913
0.341407	0.573098	0.887304	1.17259	1.46913	1.73777	2.05017	2.46094	2.89628	3.34724	3.89108	4.43652	5.30102	6.23171	7.30861	8.58153	10.8232	13.7863	16.3485	19.4227	22.3133	25.8058	30.9589	37.5073	45.6714	61.9455	92.8918
0.342064	0.573889	0.887304	1.1734	1.47002	1.74015	2.05113	2.46094	2.90139	3.34724	3.89108	4.43652	5.30102	6.24566	7.34168	8.59569	10.8393	13.801	16.3589	19.4278	22.335	25.8124	31.111	37.5307	45.6768	61.9499	93.7178
0.342696	0.573901	0.887304	1.18396	1.47137	1.74015	2.07154	2.46094	2.90331	3.34724	3.89108	4.45695	5.30102	6.24566	7.34168	8.64136	10.8959	13.8164	16.3747	19.4431	22.336	25.8773	31.1538	37.5871	45.6873	62.0337	93.7446
0.342913	0.575674	0.887304	1.18418	1.47468	1.74015	2.07364	2.46094	2.90532	3.34724	3.89108	4.45695	5.31171	6.2623	7.34168	8.64505	10.8971	13.8164	16.3749	19.4476	22.3417	25.9045	31.1595	37.6202	45.909	62.1059	93.8473
0.344012	0.577032	0.887304	1.18843	1.47525	1.74015	2.07378	2.46094	2.9073	3.34724	3.89108	4.48614	5.31477	6.27049	7.36816	8.65537	10.9643	13.8193	16.3767	19.4476	22.3458	25.9169	31.2074	37.6234	45.9187	62.1142	94.0937
0.344096	0.577397	0.887304	1.18961	1.47622	1.74015	2.07605	2.46379	2.90861	3.37444	3.92197	4.49079	5.31778	6.27418	7.38691	8.66107	10.9682	13.8477	16.3925	19.4476	22.3476	25.9334	31.2352	37.6744	45.9388	62.1347	94.1305
0.344259	0.577861	0.887304	1.19179	1.47656	1.74015	2.08385	2.46623	2.91201	3.38916	3.92815	4.5001	5.3186	6.28865	7.38691	8.69725	10.9753	13.8536	16.4165	19.4529	22.4148	25.9474	31.2425	37.6917	46.0188	62.143	94.1366
0.344385	0.578461	0.887304	1.19211	1.47656	1.74015	2.08745	2.46811	2.91836	3.3932	3.92836	4.50197	5.32253	6.28865	7.3992	8.70073	10.9753	13.8843	16.4165	19.4554	22.4162	25.9987	31.3709	37.7062	46.0833	62.1989	94.3127
0.344608	0.581566	0.887304	1.19235	1.47656	1.74015	2.08817	2.46905	2.92761	3.39513	3.9375	4.51477	5.32382	6.3184	7.3992	8.72158	11.0194	13.9212	16.4225	19.4927	22.4529	26.008	31.4047	37.707	46.0984	62.2109	94.3926
0.344643	0.583289	0.887304	1.19246	1.47656	1.74015	2.08817	2.47321	2.93536	3.39658	3.94518	4.51492	5.32708	6.32705	7.41374	8.72853	11.0257	13.922	16.423	19.595	22.4647	26.0258	31.4779	37.7503	46.1006	62.2169	94.9037
0.346911	0.583633	0.887304	1.19308	1.47656	1.74015	2.08817	2.47321	2.94894	3.40224	3.94518	4.51768	5.36169	6.32705	7.41963	8.72853	11.0742	13.932	16.4541	19.6012	22.4809	26.0343	31.5202	37.7724	46.1201	62.2831	94.9223
0.347857	0.584393	0.887304	1.20682	1.47656	1.74015	2.08817	2.47321	2.95312	3.40607	3.96675	4.51768	5.37477	6.32705	7.43313	8.73893	11.1043	13.942	16.4928	19.6145	22.4917	26.0361	31.5259	37.7865	46.1483	62.3162	95.3247
0.347883	0.584531	0.887304	1.20683	1.47656	1.74015	2.08991	2.47321	2.95312	3.41884	3.96712	4.52438	5.37477	6.32705	7.43313	8.75475	11.1158	13.9662	16.5176	19.629	22.5038	26.0458	31.5527	37.7931	46.1693	62.3788	95.4063
0.348029	0.585453	0.887304	1.2084	1.47656	1.74015	2.09317	2.47321	2.95312	3.41884	3.96814	4.52438	5.38206	6.3366	7.44001	8.78386	11.1288	13.9835	16.5176	19.6413	22.5038	26.1052	31.5753	37.8	46.2419	62.4192	95.6139
0.348029	0.58604	0.887304	1.20887	1.47656	1.74015	2.0945	2.47321	2.95523	3.41884	3.96814	4.52438	5.38361	6.33842	7.44785	8.8217	11.1288	13.9841	16.5849	19.7013	22.5293	26.1685	31.6475	37.8169	46.2479	62.4322	95.8533
0.348029	0.587259	0.887304	1.21394	1.47656	1.7438	2.09537	2.47321	2.95548	3.41884	3.96814	4.53774	5.39726	6.35094	7.44815	8.82463	11.1635	13.9925	16.5926	19.7121	22.5575	26.1763	31.6592	37.8185	46.308	62.4363	95.8986
0.348029	0.587537	0.887304	1.21448	1.47764	1.74426	2.09832	2.47735	2.96221	3.42769	3.9717	4.53774	5.39726	6.35581	7.44815	8.84433	11.1722	13.9928	16.6218	19.7428	22.5845	26.1839	31.6749	37.8466	46.331	62.469	95.9016
0.348029	0.588022	0.887304	1.22151	1.47767	1.7463	2.10263	2.48047	2.96336	3.42769	3.97577	4.53774	5.40286	6.35743	7.45217	8.87304	11.1939	14.036	16.6882	19.7505	22.5872	26.1933	31.6949	37.8649	46.3715	62.5434	95.9918
0.348029	0.59015	0.887304	1.2239	1.47888	1.74747	2.10263	2.48892	2.96336	3.43761	3.97577	4.56305	5.40286	6.37772	7.45281	8.87304	11.2386	14.0508	16.6892	19.752	22.6062	26.226	31.7305	37.8781	46.4244	62.7545	96.0029
0.348029	0.59134	0.887304	1.22924	1.48206	1.75	2.10263	2.49307	2.96336	3.44246	3.97577	4.57761	5.40286	6.38897	7.45354	8.87645	11.2935	14.0618	16.6924	19.7566	22.6727	26.2779	31.7614	37.8841	46.4984	62.7578	96.1295
0.348029	0.592434	0.887304	1.23047	1.48341	1.75043	2.10263	2.4969	2.96336	3.44531	3.97577	4.57761	5.40286	6.38897	7.47024	8.87645	11.2935	14.0963	16.7268	19.8178	22.6887	26.3044	31.7652	37.8962	46.5319	62.8217	96.2881
0.348029	0.594199	0.887304	1.23047	1.48828	1.75382	2.10263	2.50967	2.96467	3.44531	3.97577	4.57761	5.40286	6.39332	7.47645	8.89349	11.3116	14.0963	16.7344	19.8194	22.6887	26.3424	31.7747	37.9056	46.5501	62.9455	96.6484
0.348029	0.594253	0.887353	1.23047	1.48828	1.75396	2.10263	2.50967	2.96855	3.44531	4.00118	4.58787	5.41406	6.39568	7.48327	8.91389	11.331	14.0994	16.7416	19.8236	22.6961	26.3458	31.8013	37.9195	46.584	62.9479	96.7755
0.348029	0.594412	0.887516	1.23047	1.49196	1.75541	2.10263	2.50967	2.97356	3.44531	4.00612	4.59091	5.41965	6.40028	7.48465	8.91389	11.331	14.1019	16.7416	19.8377	22.7258	26.3504	31.8236	37.9577	46.61	63.117	96.9638
0.348029	0.595749	0.888728	1.23047	1.4941	1.7645	2.10263	2.50967	2.97356	3.44531	4.00612	4.59741	5.42544	6.41734	7.48465	8.94346	11.363	14.1212	16.7507	19.8407	22.726	26.3516	31.9227	37.9744	46.6499	63.1229	97.0174
0.348029	0.598119	0.891924	1.23047	1.49693	1.76483	2.10263	2.51634	2.97356	3.44611	4.00612	4.62368	5.43074	6.41734	7.48465	8.95795	11.363	14.1408	16.7622	19.8499	22.7261	26.3602	31.9524	38.0085	46.6703	63.1608	97.0745
0.348029	0.59834	0.893271	1.23047	1.49693	1.76972	2.10263	2.51697	2.97356	3.45409	4.00612	4.62368	5.43482	6.43489	7.49678	8.97493	11.363	14.1428	16.7747	19.8525	22.7487	26.378	31.9805	38.0587	46.6839	63.2375	97.126
0.348029	0.599147	0.893953	1.23047	1.49693	1.77144	2.10263	2.5174	2.98026	3.45409	4.00612	4.65659	5.43639	6.43535	7.50081	9.01034	11.4003	14.1819	16.7774	19.8788	22.75	26.3789	31.989	38.0802	46.706	63.2533	97.1669
0.348029	0.599944	0.894346	1.23047	1.49693	1.77169	2.10263	2.52209	2.99386	3.45409	4.00612	4.6693	5.43639	6.44089	7.50428	9.0253	11.4209	14.1925	16.7867	19.8849	22.7645	26.3814	31.9918	38.0873	46.8014	63.3093	97.4226
0.348029	0.605301	0.894346	1.23047	1.49693	1.77412	2.10715	2.52902	2.99386	3.47005	4.00612	4.67135	5.44574	6.44089	7.51292	9.02866	11.4297	14.2182	16.8821	19.923	22.782	26.3814	32.0584	38.1137	46.8611	63.4235	98.5095
0.348029	0.605702	0.896504	1.23047	1.49693	1.77461	2.11142	2.53369	2.99386	3.47614	4.01977	4.67289	5.44752	6.44776	7.51292	9.04876	11.4401	14.2182	16.8846	19.9281	22.782	26.3943	32.0867	38.1191	46.9033	63.5804	98.6627
0.348029	0.606107	0.903529	1.23047	1.49693	1.77461	2.11158	2.53369	2.99386	3.47692	4.02681	4.67772	5.44752	6.44922	7.53644	9.04876	11.448	14.2246	16.8875	19.9321	22.8019	26.5033	32.0867	38.1279	46.9265	63.6688	98.6983
0.348029	0.606584	0.906878	1.23047	1.49693	1.77461	2.11475	2.53369	3.00396	3.47927	4.02912	4.68225	5.45557	6.45967	7.54791	9.05286	11.4506	14.2246	16.8875	19.9336	22.8019	26.5416	32.0952	38.1445	46.9382	63.7955	98.9594
0.348029	0.610722	0.906937	1.23047	1.49693	1.77461	2.11491	2.53369	3.00649	3.48029	4.03146	4.68225	5.46417	6.45967	7.5491	9.0923	11.4885	14.2416	16.8889	19.9579	22.8496	26.5514	32.1518	38.1514	46.98	63.8422	98.9854
0.348029	0.610915	0.907459	1.23047	1.49693	1.77461	2.11698	2.53369	3.01154	3.48029	4.03624	4.68327	5.46417	6.46054	7.55964	9.10707	11.4902	14.2477	16.8964	19.9819	22.859	26.5963	32.1814	38.1736	46.9825	63.8901	99.0245
0.348029	0.611363	0.907744	1.23047	1.49693	1.77461	2.11698	2.53369	3.01662	3.48029	4.03624	4.68752	5.47086	6.48148	7.57254	9.11381	11.4902	14.2692	16.9183	20.0003	22.8602	26.6339	32.2172	38.2257	46.9962	63.9203	99.6391
0.348029	0.612258	0.908195	1.23047	1.49693	1.77461	2.11698	2.53369	3.01765	3.48029	4.03791	4.70161	5.47318	6.48314	7.57344	9.13203	11.4917	14.2756	16.9233	20.0117	22.8761	26.6419	32.2572	38.2302	47.0508	63.9437	99.7685
0.348029	0.613822	0.908839	1.23047	1.49693	1.77461	2.11698	2.53369	3.02221	3.48029	4.03791	4.70161	5.47668	6.48635	7.58091	9.15522	11.5271	14.2756	16.9305	20.0344	22.8983	26.6929	32.2646	38.2654	47.1446	63.9787	99.7954
0.348029	0.614746	0.911687	1.23047	1.49693	1.77461	2.11698	2.54359	3.02699	3.48029	4.04452	4.70161	5.4841	6.49706	7.58113	9.15852	11.5559	14.2862	16.9358	20.0575	22.8986	26.6929	32.3403	38.2671	47.1602	63.9793	99.7967
0.348029	0.61645	0.913553	1.23047	1.49693	1.77461	2.11698	2.54507	3.0275	3.48126	4.0471	4.70161	5.49716	6.51094	7.58113	9.17428	11.569	14.2862	16.9519	20.071	22.9107	26.7223	32.3742	38.2761	47.1885	63.9916	99.8019
0.348029	0.616556	0.916371	1.23047	1.49693	1.77669	2.11698	2.54651	3.03906	3.49765	4.0473	4.70382	5.49924	6.51568	7.58113	9.18823	11.569	14.2925	16.9519	20.0738	22.9594	26.7417	32.3984	38.2777	47.2506	64.0538	100.483
0.348029	0.618144	0.918181	1.23047	1.49693	1.77784	2.11698	2.55125	3.04401	3.49765	4.05868	4.70636	5.50282	6.52509	7.59285	9.18823	11.5769	14.3073	16.9781	20.0804	23.0042	26.7643	32.434	38.3379	47.2993	64.0662	100.581
0.348029	0.618148	0.919613	1.23047	1.49693	1.78869	2.11698	2.55436	3.04401	3.49765	4.05868	4.73371	5.50282	6.52509	7.60107	9.18823	11.5847	14.3073	16.9949	20.0816	23.0198	26.7881	32.4402	38.3613	47.3257	64.0771	101.315
0.348029	0.618302	0.919647	1.23047	1.49693	1.78869	2.11698	2.55722	3.04798	3.49765	4.05868	4.73371	5.50338	6.52837	7.6014	9.18823	11.6025	14.3073	17.0185	20.0979	23.0341	26.7903	32.4555	38.3796	47.3501	64.1168	101.477
0.348029	0.618616	0.919821	1.23047	1.49693	1.79159	2.11795	2.55733	3.04819	3.52353	4.05868	4.73371	5.50705	6.5383	7.62489	9.18823	11.6082	14.321	17.0676	20.1391	23.0345	26.8272	32.4695	38.3977	47.4963	64.1814	101.49
0.348029	0.619512	0.923744	1.23047	1.50175	1.79159	2.11915	2.5641	3.05561	3.52353	4.05868	4.74343	5.51499	6.53887	7.63287	9.19089	11.6082	14.3327	17.0729	20.1463	23.0541	26.8522	32.4838	38.3977	47.5004	64.3044	101.504
0.348029	0.619654	0.924076	1.23047	1.50233	1.79159	2.1238	2.56448	3.05688	3.52353	4.06316	4.75286	5.51708	6.5485	7.63287	9.19482	11.6284	14.3327	17.1026	20.1812	23.0541	26.8741	32.4863	38.4064	47.5343	64.3609	101.753
0.348029	0.62042	0.925858	1.23047	1.50286	1.79159	2.1281	2.56929	3.05698	3.52353	4.07358	4.77128	5.52148	6.55249	7.64415	9.20998	11.6874	14.34	17.1299	20.1867	23.083	26.9234	32.5179	38.4741	47.542	64.4634	101.769
0.348029	0.622509	0.926869	1.23047	1.50686	1.79159	2.1298	2.56929	3.07794	3.52353	4.07358	4.77828	5.53027	6.55609	7.64477	9.25064	11.7319	14.3705	17.1384	20.1887	23.0883	26.9322	32.5449	38.4741	47.5849	64.51	101.839
0.348029	0.623572	0.929617	1.23047	1.50723	1.79159	2.13369	2.56929	3.08053	3.52526	4.08781	4.77828	5.53027	6.5666	7.64477	9.27925	11.7328	14.377	17.1436	20.1971	23.1092	26.9863	32.6177	38.4891	47.6119	64.5221	101.979
0.348029	0.623848	0.929707	1.23047	1.50881	1.79159	2.13643	2.56929	3.08355	3.53277	4.09582	4.77828	5.53027	6.5666	7.64566	9.29983	11.7504	14.4209	17.172	20.2037	23.1119	27.0412	32.6193	38.4921	47.659	64.5221	102.002
0.348029	0.624895	0.930118	1.23047	1.50881	1.79159	2.13693	2.56929	3.08355	3.5383	4.09582	4.78506	5.53708	6.59077	7.64994	9.30925	11.7534	14.438	17.172	20.2086	23.1132	27.0828	32.6258	38.4954	47.8459	64.5399	102.342
0.348029	0.625323	0.931747	1.23047	1.5109	1.79159	2.1404	2.56929	3.08355	3.54921	4.09582	4.80101	5.5465	6.61255	7.68889	9.33279	11.7534	14.4948	17.177	20.2355	23.1289	27.086	32.6467	38.5237	47.8543	64.5442	102.38
0.348029	0.626158	0.932179	1.23047	1.51211	1.79159	2.14705	2.56929	3.08355	3.54921	4.10559	4.80508	5.5465	6.61349	7.70788	9.35253	11.8253	14.4989	17.2029	20.2746	23.1328	27.086	32.6702	38.5268	47.8847	64.5631	102.687
0.348029	0.62658	0.93698	1.23047	1.51576	1.79211	2.14997	2.57094	3.0871	3.54921	4.11715	4.82203	5.55213	6.62268	7.70788	9.37097	11.8381	14.5112	17.2336	20.2755	23.138	27.0983	32.7083	38.6304	47.9023	64.5817	102.94
0.348029	0.626853	0.942817	1.23047	1.51585	1.79304	2.15335	2.573	3.09002	3.54921	4.11988	4.83498	5.57416	6.62628	7.72358	9.38066	11.8866	14.5195	17.2336	20.2972	23.1603	27.124	32.7527	38.6304	47.9976	64.5948	103.017
0.348029	0.62784	0.944953	1.23047	1.51725	1.79571	2.15457	2.57782	3.0964	3.54921	4.12528	4.83498	5.57933	6.62628	7.7275	9.38066	11.907	14.5279	17.2459	20.3188	23.1694	27.1364	32.7933	38.6375	48.0513	64.7697	103.019
0.348029	0.628895	0.9456	1.23047	1.52269	1.80037	2.16015	2.5858	3.10049	3.55149	4.12528	4.83498	5.57933	6.62628	7.7275	9.38321	11.9789	14.5301	17.3244	20.3426	23.1694	27.1385	32.799	38.7236	48.0767	64.8371	103.606
0.348029	0.629428	0.946119	1.23047	1.52465	1.80433	2.16188	2.58767	3.10276	3.55645	4.12528	4.8442	5.57933	6.62628	7.7275	9.41272	12.0007	14.5383	17.3265	20.3426	23.1694	27.1563	32.836	38.7588	48.1087	65.028	103.627
0.348029	0.629962	0.947138	1.23047	1.52492	1.80697	2.16462	2.58889	3.10408	3.56227	4.12528	4.84463	5.58665	6.64879	7.7275	9.41932	12.0083	14.5392	17.3581	20.3517	23.1956	27.1875	32.8671	38.7792	48.1303	65.0884	103.859
0.348029	0.630415	0.947599	1.23047	1.54201	1.81185	2.16866	2.59206	3.10877	3.58318	4.12528	4.84748	5.60292	6.64909	7.7275	9.41932	12.0183	14.5425	17.3893	20.3679	23.2152	27.2053	32.9464	38.7891	48.147	65.1475	103.99
0.348029	0.631072	0.94778	1.23047	1.54208	1.81334	2.17647	2.59318	3.1119	3.58318	4.12528	4.84748	5.6118	6.64909	7.73243	9.45601	12.0284	14.6089	17.3893	20.3783	23.2225	27.21	32.9928	38.7948	48.1502	65.2037	104.276
0.348029	0.631949	0.949963	1.23047	1.54329	1.81412	2.18111	2.603	3.11287	3.58318	4.12772	4.84748	5.6118	6.64909	7.73946	9.46944	12.0686	14.6604	17.3986	20.3872	23.2243	27.2276	33.0019	38.8439	48.1974	65.2213	104.673
0.348029	0.632938	0.951546	1.23047	1.54472	1.81468	2.18457	2.61519	3.11287	3.58318	4.14178	4.8485	5.6118	6.65731	7.78217	9.48122	12.0987	14.6749	17.4015	20.4273	23.2321	27.2331	33.0074	38.8452	48.2651	65.258	105.025
0.348029	0.632941	0.952596	1.23047	1.55074	1.82246	2.19569	2.61601	3.11341	3.58389	4.15539	4.86167	5.65528	6.66274	7.78217	9.57238	12.1096	14.6834	17.4042	20.4495	23.253	27.2578	33.0125	38.9054	48.2908	65.2879	105.277
0.348029	0.637821	0.952813	1.23047	1.55354	1.82354	2.20113	2.61601	3.11564	3.58779	4.15802	4.86581	5.65641	6.67031	7.78217	9.58503	12.1187	14.6875	17.4075	20.4495	23.2659	27.282	33.0573	38.9202	48.3059	65.3581	106.149
0.348029	0.640468	0.953097	1.23047	1.55643	1.82724	2.20113	2.61601	3.11703	3.59105	4.15828	4.86586	5.66039	6.68182	7.79882	9.58503	12.1187	14.7122	17.4112	20.4611	23.2868	27.282	33.1067	38.9485	48.3265	65.4165	106.249
0.348029	0.640983	0.954882	1.23047	1.55643	1.82939	2.20113	2.61601	3.11767	3.59425	4.1648	4.88482	5.66232	6.68345	7.81217	9.59766	12.1268	14.7421	17.4241	20.4628	23.2993	27.3253	33.1366	38.9654	48.3498	65.4484	106.56
0.348029	0.641501	0.958467	1.23047	1.55643	1.82983	2.20113	2.61601	3.13226	3.6206	4.18057	4.89248	5.66321	6.69447	7.82636	9.60081	12.133	14.7513	17.4241	20.4672	23.3115	27.3264	33.1704	38.9701	48.3818	65.5444	106.961
0.348029	0.642218	0.958585	1.23511	1.55643	1.83028	2.20113	2.61601	3.13226	3.63353	4.18084	4.89776	5.6655	6.69447	7.82844	9.65114	12.1332	14.7677	17.4328	20.4791	23.3115	27.3311	33.1759	39.0491	48.4073	65.6037	107.651
0.348029	0.64314	0.959082	1.2391	1.55643	1.83155	2.20113	2.61755	3.1364	3.63353	4.18359	4.89985	5.67212	6.69447	7.84393	9.65114	12.1553	14.7677	17.4368	20.4835	23.3115	27.3489	33.2129	39.0515	48.4211	65.6247	107.776
0.348029	0.643813	0.959116	1.24023	1.55643	1.83335	2.20113	2.61776	3.13757	3.63353	4.19083	4.90338	5.68152	6.70511	7.84804	9.66995	12.1561	14.7989	17.4477	20.485	23.3595	27.4328	33.2288	39.0843	48.5129	65.6314	107.84
0.348029	0.645308	0.960334	1.24023	1.55643	1.83531	2.20113	2.63264	3.14423	3.63353	4.19083	4.9205	5.68152	6.71705	7.85189	9.67621	12.2381	14.8168	17.4605	20.5204	23.3784	27.4534	33.2372	39.0855	48.526	65.6554	108.428
0.348029	0.646166	0.962615	1.24023	1.55643	1.83945	2.20443	2.63279	3.15154	3.6499	4.19083	4.92188	5.68152	6.71705	7.85189	9.70745	12.2603	14.8168	17.4744	20.5204	23.3839	27.4568	33.2858	39.0928	48.5642	65.6646	109.018
0.348029	0.646586	0.967997	1.24631	1.55643	1.84682	2.20605	2.63764	3.15154	3.654	4.19083	4.92188	5.70477	6.71705	7.86346	9.73351	12.2603	14.8179	17.5004	20.5263	23.4073	27.4844	33.3195	39.1111	48.5653	65.6677	109.578
0.348029	0.64667	0.969394	1.24641	1.55643	1.84721	2.2064	2.64037	3.15567	3.65845	4.19083	4.92802	5.71672	6.71911	7.87361	9.73549	12.2874	14.8194	17.508	20.5602	23.4449	27.5031	33.4026	39.1931	48.5778	65.7186	111.13
0.348029	0.647349	0.970336	1.2473	1.55643	1.85039	2.20919	2.6454	3.17472	3.65845	4.19083	4.92802	5.72399	6.72156	7.87884	9.7372	12.2998	14.8678	17.5142	20.5725	23.4629	27.5141	33.4339	39.2247	48.6202	65.7495	111.624
0.348029	0.649068	0.973006	1.25031	1.55643	1.85118	2.21302	2.65051	3.17481	3.65845	4.20181	4.92802	5.72399	6.74518	7.88035	9.74482	12.2998	14.8678	17.5395	20.5853	23.4629	27.5141	33.4479	39.2618	48.6774	65.8226	111.688
0.348029	0.651544	0.977629	1.25317	1.55643	1.85553	2.21484	2.65051	3.17685	3.65845	4.20525	4.93908	5.74512	6.7575	7.89037	9.75103	12.3413	14.8683	17.5832	20.6342	23.4866	27.5174	33.4688	39.3166	48.8854	65.8807	111.696
0.348029	0.651848	0.97921	1.25484	1.55643	1.85971	2.21484	2.65224	3.18272	3.66137	4.20525	4.94642	5.74512	6.7575	7.89037	9.76034	12.3471	14.8864	17.597	20.6416	23.5081	27.5196	33.483	39.3633	48.957	65.9187	111.752
0.348029	0.653777	0.979295	1.25484	1.55643	1.86413	2.21484	2.6561	3.18313	3.66237	4.20525	4.94642	5.74512	6.7575	7.90479	9.82528	12.3563	14.9176	17.6125	20.6558	23.5557	27.5207	33.5047	39.3663	48.9737	66.0441	112.666
0.348029	0.654978	0.979911	1.25484	1.55643	1.86466	2.21657	2.65879	3.18344	3.67264	4.20525	4.94642	5.7589	6.7575	7.91143	9.82528	12.3576	14.9227	17.6407	20.6953	23.5658	27.602	33.5127	39.3827	48.9999	66.0521	113.154
0.348029	0.655594	0.980158	1.25484	1.55643	1.86832	2.218	2.65888	3.18374	3.68576	4.21029	4.94715	5.76091	6.7575	7.92483	9.85605	12.4247	14.9491	17.6451	20.7086	23.5762	27.6064	33.5353	39.3911	49.0097	66.0912	114.136
0.348029	0.658941	0.9835	1.25484	1.55643	1.86856	2.2186	2.66056	3.18869	3.68606	4.21245	4.94836	5.76091	6.7888	7.92483	9.89165	12.4328	14.9632	17.6451	20.7216	23.6455	27.6557	33.5447	39.4537	49.0474	66.1187	114.154
0.348029	0.659028	0.984328	1.25484	1.55867	1.86948	2.21909	2.66191	3.18893	3.6867	4.21245	4.95254	5.76616	6.7888	7.92483	9.90508	12.4336	14.9692	17.6588	20.7216	23.6877	27.6951	33.589	39.4856	49.0524	66.1457	114.757
0.348029	0.659575	0.984375	1.25484	1.55874	1.87419	2.22502	2.66191	3.19099	3.69141	4.2168	4.95269	5.76766	6.7888	7.93628	9.90508	12.4498	15.0055	17.6908	20.7216	23.6877	27.7115	33.6183	39.5378	49.077	66.1736	114.911
0.348029	0.659636	0.984375	1.25484	1.5646	1.87419	2.22533	2.66191	3.19375	3.69141	4.22241	4.9563	5.78258	6.78884	7.93628	9.90936	12.4568	15.0289	17.7256	20.726	23.7197	27.7203	33.6323	39.5737	49.1412	66.1772	115.647
0.348029	0.660465	0.984375	1.25484	1.56643	1.87419	2.22626	2.66191	3.19922	3.69141	4.23387	4.97694	5.79236	6.80662	7.93628	9.92036	12.4608	15.0299	17.7523	20.726	23.7634	27.7301	33.6712	39.6667	49.156	66.2132	115.681
0.348029	0.66078	0.984375	1.25484	1.56879	1.87419	2.22824	2.66268	3.19922	3.69141	4.23396	4.97694	5.79236	6.80662	7.93628	9.92036	12.4612	15.0299	17.7768	20.7435	23.7643	27.8184	33.678	39.7371	49.1648	66.2628	115.902
0.348029	0.662423	0.984375	1.25484	1.56879	1.87419	2.22847	2.6629	3.19922	3.69141	4.23594	4.98302	5.79236	6.80662	7.94638	9.92036	12.4643	15.0299	17.7768	20.7932	23.7863	27.8246	33.7072	39.74	49.2212	66.2705	116.661
0.348029	0.664332	0.984375	1.25484	1.56906	1.87419	2.22847	2.67659	3.19922	3.69141	4.23616	4.98302	5.79236	6.81113	7.95153	9.92036	12.501	15.0359	17.8023	20.799	23.8292	27.8478	33.7299	39.7523	49.3519	66.4148	117.15
0.348029	0.664725	0.984375	1.25484	1.57129	1.87419	2.22847	2.67815	3.19922	3.69221	4.23729	4.98468	5.80802	6.84211	7.97257	9.93256	12.5464	15.0359	17.8259	20.8357	23.8457	27.9107	33.7355	39.7531	49.4805	66.7181	117.296
0.348029	0.664906	0.984375	1.25484	1.57446	1.87419	2.22847	2.68001	3.19979	3.69836	4.24824	4.98616	5.80802	6.84211	7.98573	9.93256	12.5527	15.044	17.8278	20.8389	23.8546	27.9335	33.7364	39.7577	49.4869	66.8818	117.387
0.348029	0.665	0.984375	1.25484	1.57577	1.87419	2.22847	2.68939	3.20028	3.6996	4.24824	4.99067	5.83014	6.84677	8.03488	10.0162	12.5694	15.044	17.8278	20.8484	23.8624	27.9335	33.7707	39.7779	49.5194	66.9312	117.389
0.348029	0.666345	0.984375	1.25484	1.57577	1.87419	2.22847	2.69869	3.20226	3.6996	4.25292	4.99185	5.83833	6.85899	8.03488	10.0176	12.5701	15.0609	17.8294	20.8484	23.8724	27.9682	33.775	39.7971	49.5425	66.9321	117.654
0.348029	0.666661	0.984375	1.25484	1.57577	1.87419	2.23025	2.70331	3.20417	3.70734	4.25503	5.00325	5.84958	6.88434	8.03488	10.0206	12.611	15.0661	17.8361	20.8484	23.8724	28.0007	33.787	39.8725	49.5963	67.0464	117.733
0.348029	0.667286	0.984375	1.25484	1.57577	1.87419	2.2355	2.70696	3.20685	3.71076	4.25616	5.00354	5.84958	6.88575	8.04911	10.0239	12.611	15.0741	17.8583	20.8614	23.8914	28.0082	33.8036	39.8793	49.6456	67.1006	118.843
0.348029	0.66811	0.984375	1.25484	1.57577	1.87419	2.24042	2.70703	3.20867	3.72407	4.26436	5.00619	5.84958	6.89502	8.05534	10.0417	12.6158	15.0813	17.8721	20.8717	23.9382	28.1044	33.8081	39.9888	49.7628	67.1218	119.061
0.348029	0.669251	0.984375	1.25484	1.57577	1.87419	2.24179	2.70733	3.20867	3.72407	4.27642	5.00791	5.84958	6.90818	8.0565	10.0417	12.6158	15.0842	17.8838	20.8846	23.9441	28.1116	33.8301	39.9953	49.8278	67.1856	119.432
0.348029	0.669689	0.984375	1.25484	1.57577	1.8746	2.25199	2.70967	3.20867	3.72715	4.28195	5.00791	5.8529	6.93006	8.07248	10.0417	12.636	15.0922	17.8849	20.8879	24.0014	28.139	33.8326	40.0135	49.8606	67.1858	120.68
0.348029	0.671731	0.984375	1.25484	1.57577	1.87759	2.25381	2.713	3.20867	3.74054	4.28462	5.04942	5.87025	6.93006	8.10613	10.0479	12.6373	15.1102	17.8917	20.9174	24.0163	28.2353	33.8623	40.0158	49.8609	67.1908	120.965
0.348029	0.67579	0.984375	1.25484	1.57577	1.88397	2.25762	2.71607	3.20867	3.74527	4.28752	5.05918	5.87025	6.94593	8.11848	10.0917	12.6373	15.1375	17.8938	20.918	24.0203	28.244	33.9083	40.0249	49.8711	67.2449	122.436
0.348029	0.675995	0.984375	1.25484	1.57577	1.89052	2.26125	2.71819	3.20867	3.74839	4.2945	5.06738	5.89374	6.96058	8.14715	10.0987	12.6398	15.1466	17.899	20.9228	24.0228	28.2503	33.9174	40.1337	49.877	67.3183	122.513
0.348029	0.677108	0.984375	1.25484	1.57577	1.89235	2.26158	2.71819	3.20867	3.74839	4.29495	5.06738	5.89558	6.96493	8.15256	10.1168	12.6493	15.1624	17.9108	20.9351	24.0317	28.2622	33.936	40.1737	49.977	67.3708	123.195
0.348029	0.678716	0.984375	1.25484	1.57577	1.89278	2.26375	2.71819	3.21116	3.74839	4.29784	5.07029	5.9165	6.98947	8.15283	10.1168	12.6858	15.1742	17.9243	20.9397	24.0682	28.2622	33.9747	40.2597	50.0042	67.4876	123.362
0.348029	0.680346	0.984375	1.25694	1.57577	1.89604	2.26644	2.72852	3.21958	3.74839	4.29784	5.07335	5.9165	7.00296	8.18054	10.1182	12.7008	15.1802	17.9243	20.9397	24.077	28.3264	33.9943	40.3481	50.0442	67.5916	123.477
0.348029	0.680373	0.984375	1.26112	1.57577	1.9083	2.26887	2.72974	3.21977	3.74839	4.29791	5.07335	5.9165	7.00395	8.18054	10.1244	12.7019	15.1974	17.9311	20.9758	24.1184	28.3275	34.1021	40.3631	50.054	67.5944	124.256
0.348029	0.681917	0.984375	1.2648	1.57577	1.90849	2.26887	2.74065	3.23414	3.74845	4.30208	5.07335	5.9165	7.01583	8.18748	10.1348	12.738	15.2578	17.9514	20.9775	24.1373	28.3322	34.1144	40.3857	50.0937	67.618	124.33
0.348029	0.684992	0.984375	1.26563	1.57577	1.90858	2.26887	2.74394	3.23686	3.75646	4.30488	5.07335	5.91877	7.03845	8.19163	10.1377	12.739	15.2657	17.9648	21.0202	24.1385	28.3773	34.1162	40.4021	50.1279	67.6359	124.788
0.348029	0.685873	0.984375	1.27088	1.57577	1.91297	2.26887	2.7483	3.23686	3.75646	4.30488	5.07335	5.92672	7.03845	8.21479	10.1467	12.7763	15.2895	17.9648	21.0263	24.1714	28.3788	34.1219	40.4074	50.1668	67.6846	125.397
0.348029	0.685958	0.984375	1.27431	1.57577	1.91382	2.26887	2.7495	3.23686	3.75721	4.30604	5.07335	5.92672	7.05135	8.22483	10.1467	12.7779	15.2994	17.9665	21.0263	24.1736	28.4491	34.1345	40.4143	50.2037	67.6883	125.965
0.348029	0.686574	0.984375	1.28886	1.57577	1.91382	2.26887	2.75141	3.23686	3.76451	4.30866	5.07335	5.93222	7.0608	8.25424	10.1699	12.813	15.2994	17.9665	21.0349	24.1917	28.4659	34.1459	40.4253	50.2941	67.7005	127.265
0.348029	0.687508	0.984375	1.28928	1.57577	1.91629	2.26887	2.75141	3.23686	3.76451	4.31366	5.07335	5.94712	7.09208	8.27256	10.1735	12.8347	15.3216	17.9665	21.0392	24.1974	28.4722	34.1707	40.5129	50.3771	67.7049	127.713
0.348029	0.688986	0.984375	1.29231	1.58253	1.9209	2.26887	2.75141	3.23686	3.76451	4.31421	5.07541	5.95221	7.09321	8.32728	10.2382	12.8587	15.3275	17.98	21.0392	24.2037	28.5065	34.186	40.5637	50.4226	67.9541	127.813
0.348029	0.690987	0.984375	1.2946	1.58267	1.92205	2.26887	2.75141	3.23686	3.76451	4.31678	5.09408	5.95221	7.09843	8.32728	10.2447	12.8818	15.3487	18.0001	21.0592	24.2193	28.5141	34.1941	40.5719	50.4246	67.9736	128.142
0.348029	0.693427	0.985165	1.29487	1.58645	1.92205	2.26887	2.75141	3.23853	3.77152	4.32999	5.09829	5.96345	7.09843	8.3539	10.2565	12.8832	15.3548	18.0254	21.0694	24.2267	28.5267	34.195	40.5868	50.4708	68.0188	128.905
0.348029	0.694029	0.986038	1.29514	1.58758	1.92205	2.26887	2.75141	3.24362	3.78627	4.333	5.1147	5.97009	7.09843	8.3997	10.2772	12.8914	15.3798	18.0356	21.091	24.2374	28.5384	34.2008	40.6182	50.5329	68.0946	128.953
0.348029	0.694464	0.98755	1.29636	1.591	1.92205	2.26887	2.75141	3.24448	3.79343	4.35384	5.12088	5.98772	7.10269	8.3997	10.2831	12.8959	15.3906	18.0432	21.1233	24.2561	28.5558	34.2055	40.6323	50.538	68.1025	130.637
0.348029	0.694766	0.987764	1.29939	1.59243	1.92205	2.26887	2.76882	3.24547	3.80554	4.36079	5.12088	5.98772	7.13672	8.40554	10.2831	12.9305	15.402	18.0472	21.1426	24.3247	28.6328	34.215	40.6623	50.55	68.1298	131.585
0.348029	0.695071	0.988156	1.30533	1.59949	1.92205	2.27622	2.7715	3.28201	3.81024	4.36079	5.13859	5.99277	7.15367	8.40751	10.3145	12.9496	15.4158	18.0724	21.155	24.3347	28.6935	34.2296	40.6896	50.5667	68.1976	131.853
0.348029	0.695346	0.989349	1.30589	1.60118	1.92205	2.28249	2.77645	3.2833	3.81387	4.36079	5.14238	5.99497	7.15367	8.4177	10.315	12.9685	15.4177	18.1059	21.1998	24.362	28.7214	34.2752	40.6931	50.6066	68.3384	132.801
0.348029	0.696058	0.990034	1.307	1.60415	1.92205	2.28438	2.77714	3.28601	3.81879	4.36079	5.14287	6.02028	7.15367	8.42271	10.3341	12.9941	15.4808	18.1358	21.1998	24.4365	28.746	34.284	40.7328	50.6185	68.3933	133.277
0.348029	0.696058	0.991008	1.30737	1.60434	1.92205	2.28802	2.78423	3.28785	3.8204	4.38157	5.14301	6.02397	7.15367	8.44766	10.3407	12.9959	15.4883	18.1372	21.2169	24.4497	28.7498	34.3563	40.7789	50.6251	68.4583	134.532
0.348029	0.696058	0.991773	1.30761	1.6045	1.92205	2.28886	2.78932	3.2881	3.8204	4.38157	5.1546	6.02554	7.15367	8.46791	10.3453	13.0044	15.5059	18.1448	21.2428	24.4625	28.7717	34.3723	40.9027	50.6444	68.4617	134.712
0.348029	0.696058	0.992188	1.31109	1.60912	1.92205	2.29195	2.79887	3.29249	3.82832	4.39078	5.17905	6.02624	7.15367	8.47506	10.3506	13.0151	15.5246	18.1482	21.2626	24.4811	28.877	34.3998	40.9076	50.7535	68.4928	134.722
0.348029	0.696058	0.995321	1.31559	1.61029	1.92205	2.29646	2.79982	3.29284	3.82832	4.40226	5.17937	6.03306	7.15367	8.48848	10.374	13.0172	15.5371	18.1556	21.2807	24.4873	28.878	34.4341	40.9286	50.8956	68.5059	135.151
0.348029	0.696058	1.00149	1.31623	1.61083	1.92205	2.29942	2.80566	3.30169	3.84411	4.40226	5.18098	6.05311	7.16422	8.52607	10.3856	13.0314	15.5498	18.1687	21.2931	24.4959	28.8885	34.4531	40.9922	51.0079	68.5136	135.706
0.348029	0.696058	1.0031	1.32199	1.615	1.92205	2.30313	2.8059	3.30169	3.84411	4.40226	5.18362	6.05311	7.16631	8.52849	10.3856	13.04	15.5663	18.2064	21.3089	24.5132	28.8896	34.477	40.9966	51.0459	68.5737	135.79
0.348029	0.696058	1.0037	1.32419	1.61547	1.92221	2.3057	2.8059	3.30169	3.84411	4.40597	5.19135	6.05311	7.16636	8.52849	10.3856	13.043	15.5814	18.2176	21.3211	24.5168	28.9021	34.5117	41.0003	51.0548	68.5826	136.207
0.348029	0.696058	1.00577	1.32441	1.61688	1.92605	2.31698	2.8059	3.30169	3.84411	4.40682	5.19135	6.06192	7.16823	8.53204	10.4303	13.0615	15.5921	18.2724	21.3637	24.5515	28.9273	34.5328	41.1097	51.136	68.6975	136.945
0.348029	0.696058	1.00897	1.32526	1.6194	1.92761	2.32164	2.8059	3.30169	3.84411	4.42969	5.19135	6.06216	7.17175	8.54268	10.4554	13.0712	15.6229	18.2922	21.3691	24.5921	28.9393	34.5335	41.1635	51.1554	68.7226	138.057
0.348029	0.696058	1.01078	1.32526	1.62161	1.9369	2.32164	2.8059	3.31085	3.85072	4.42969	5.19461	6.07807	7.1748	8.59569	10.4991	13.0801	15.6303	18.317	21.3896	24.6052	28.944	34.5443	41.1683	51.1831	68.7377	138.157
0.348029	0.696058	1.01226	1.32526	1.62976	1.93731	2.32887	2.8059	3.31085	3.85198	4.43449	5.21463	6.07807	7.1748	8.59666	10.5706	13.1009	15.6342	18.3184	21.4045	24.6057	29.0331	34.5859	41.2213	51.2236	68.773	138.551
0.348029	0.696058	1.01342	1.32526	1.63039	1.93902	2.33078	2.8059	3.31085	3.85198	4.43652	5.21463	6.07807	7.18745	8.61048	10.5706	13.1078	15.6418	18.3204	21.4045	24.6585	29.0403	34.6527	41.2694	51.2511	68.8555	139.309
0.348029	0.696058	1.01467	1.32526	1.63076	1.9426	2.33426	2.8059	3.31085	3.85198	4.43652	5.21463	6.08802	7.18745	8.61257	10.5706	13.1134	15.6516	18.3601	21.4045	24.688	29.0557	34.6625	41.28	51.4477	68.9106	139.7
0.348029	0.696058	1.01467	1.32526	1.63511	1.94429	2.33465	2.8059	3.31085	3.85198	4.43652	5.22044	6.08802	7.21908	8.61328	10.6163	13.1195	15.6584	18.3649	21.4158	24.6941	29.061	34.6757	41.3621	51.4687	68.9383	140.09
0.348029	0.696058	1.01467	1.32526	1.63755	1.94468	2.33465	2.8059	3.33991	3.85198	4.43652	5.22044	6.11284	7.22032	8.61328	10.6249	13.1203	15.6611	18.3896	21.4384	24.7174	29.0667	34.7133	41.3826	51.4759	69.0134	140.562
0.348029	0.696058	1.01467	1.32526	1.63815	1.94591	2.33465	2.8059	3.34266	3.85198	4.43652	5.22743	6.11996	7.23783	8.61677	10.6476	13.1336	15.6748	18.3932	21.4878	24.7243	29.112	34.755	41.4096	51.4927	69.0914	140.894
0.348029	0.696058	1.01467	1.32526	1.63908	1.9467	2.33465	2.8059	3.34724	3.85759	4.44861	5.23202	6.13415	7.24202	8.65537	10.674	13.1447	15.6768	18.4222	21.4991	24.738	29.1153	34.7697	41.4565	51.6738	69.1103	141.072
0.348029	0.696058	1.01467	1.32526	1.64117	1.94801	2.33465	2.8059	3.34724	3.85853	4.44933	5.23202	6.15234	7.24313	8.65537	10.676	13.1447	15.6787	18.4439	21.5005	24.8294	29.1868	34.7829	41.4657	51.7393	69.1471	141.163
0.348029	0.696058	1.01467	1.32526	1.64302	1.94891	2.33465	2.8059	3.34724	3.86019	4.45695	5.24659	6.15234	7.26194	8.69721	10.6846	13.1618	15.7231	18.4734	21.5244	24.833	29.2148	34.8029	41.4818	51.8388	69.1853	142.043
0.348029	0.696058	1.01467	1.32526	1.65029	1.96185	2.33465	2.8059	3.34724	3.8687	4.45695	5.25602	6.15726	7.28257	8.70073	10.6846	13.1631	15.7544	18.4947	21.5244	24.8603	29.271	34.8307	41.4856	51.9957	69.2294	142.214
0.348029	0.696058	1.01467	1.32526	1.6508	1.96315	2.33465	2.80761	3.34724	3.87794	4.45695	5.26088	6.15726	7.28787	8.70073	10.6952	13.1829	15.7594	18.498	21.6129	24.8698	29.3183	34.8339	41.4871	52.1051	69.3006	142.386
0.348029	0.696058	1.01467	1.32526	1.65085	1.96441	2.33465	2.80762	3.34724	3.89108	4.45695	5.26088	6.16709	7.29843	8.70073	10.6959	13.2303	15.773	18.5013	21.6367	24.9083	29.3349	34.8453	41.4928	52.126	69.3019	142.617
0.348029	0.696058	1.01467	1.32526	1.65085	1.96875	2.33815	2.81358	3.34724	3.89108	4.46316	5.26088	6.172	7.30447	8.70073	10.7889	13.2325	15.7827	18.5274	21.6814	24.9659	29.4033	34.8863	41.5481	52.1448	69.429	142.734
0.348029	0.696058	1.01467	1.32526	1.65085	1.96875	2.34007	2.81488	3.34724	3.89108	4.46359	5.26088	6.172	7.30447	8.72158	10.7894	13.2467	15.7846	18.5499	21.6856	24.9982	29.4203	34.8881	41.5897	52.1672	69.538	142.901
0.348029	0.696058	1.01467	1.32526	1.65085	1.96875	2.34477	2.81877	3.34724	3.89108	4.49291	5.26122	6.17759	7.30861	8.72158	10.7945	13.2703	15.821	18.5618	21.7065	25.0012	29.4536	34.8898	41.7693	52.2189	69.5574	143.633
0.348029	0.696058	1.01467	1.32526	1.65085	1.96875	2.34479	2.82302	3.34724	3.89108	4.5007	5.26332	6.1776	7.30861	8.72653	10.8221	13.2932	15.821	18.624	21.7149	25.0269	29.4953	34.9468	41.7777	52.2281	69.7818	143.813
0.348029	0.696058	1.01467	1.32526	1.65085	1.96875	2.34496	2.82328	3.34724	3.89108	4.50501	5.26664	6.19648	7.34168	8.72853	10.8303	13.3089	15.8363	18.6448	21.7261	25.0303	29.5073	35.0367	41.7881	52.2334	69.7978	144.021
0.348029	0.696058	1.01467	1.32526	1.65085	1.96875	2.34613	2.82531	3.34724	3.89108	4.51768	5.26664	6.20048	7.34168	8.73893	10.8628	13.3096	15.8363	18.6467	21.7304	25.0967	29.5082	35.0463	41.7883	52.2606	69.8188	144.145
0.348029	0.696058	1.01467	1.32526	1.65085	1.97127	2.34622	2.82776	3.34724	3.90038	4.52024	5.27154	6.20117	7.361	8.73893	10.8783	13.3209	15.8363	18.6545	21.7525	25.0969	29.5438	35.0742	41.799	52.2842	69.8299	144.569
0.348029	0.696058	1.01467	1.32526	1.65085	1.97913	2.35318	2.8282	3.34724	3.91157	4.52438	5.27356	6.21926	7.36327	8.76315	10.895	13.3481	15.8363	18.6545	21.7692	25.1235	29.5497	35.1122	41.8038	52.3395	69.9339	144.599
0.348029	0.696058	1.01467	1.32526	1.65085	1.98262	2.35421	2.83186	3.34724	3.91263	4.52438	5.28386	6.22098	7.36631	8.77505	10.9006	13.3537	15.8878	18.7047	21.7748	25.1364	29.5569	35.2106	41.8171	52.3463	69.9801	144.935
0.348029	0.696058	1.01467	1.32526	1.65085	1.98407	2.3588	2.8351	3.34724	3.91658	4.52438	5.28386	6.22573	7.38281	8.78386	10.9135	13.3571	15.8944	18.7429	21.7975	25.1531	29.607	35.2224	41.8399	52.3492	70.0404	146.816
0.348029	0.696058	1.01467	1.32526	1.65085	1.98407	2.36602	2.84386	3.34724	3.92885	4.52438	5.28386	6.22724	7.38281	8.8217	10.9283	13.4003	15.8983	18.7638	21.804	25.1546	29.6335	35.2238	41.8855	52.381	70.0459	146.935
0.348029	0.696058	1.01467	1.32693	1.65085	1.98407	2.36745	2.84634	3.34724	3.9375	4.52438	5.28386	6.2306	7.38426	8.8453	10.9643	13.4167	15.9031	18.7695	21.804	25.1799	29.6753	35.2469	41.9209	52.5311	70.2765	147.096
0.348029	0.696058	1.01467	1.33066	1.65085	1.98407	2.37062	2.85374	3.34724	3.9375	4.53774	5.29141	6.2306	7.38691	8.86399	10.9753	13.4341	15.9788	18.8226	21.804	25.1979	29.712	35.2715	41.9496	52.5328	70.3096	147.204
0.348029	0.696058	1.01467	1.33198	1.65085	1.98407	2.37262	2.86094	3.34724	3.9375	4.53774	5.30102	6.2306	7.40329	8.87304	10.9793	13.5165	15.9961	18.8386	21.8137	25.2147	29.7177	35.2876	41.9982	52.5847	70.3557	148.532
0.348029	0.696058	1.01467	1.33473	1.65085	1.98407	2.37801	2.86107	3.34932	3.9375	4.53774	5.30775	6.2306	7.40393	8.87645	10.983	13.5352	15.9961	18.8531	21.8197	25.2183	29.7315	35.3141	42.0446	52.6664	70.5706	149.515
0.348029	0.696058	1.01467	1.33577	1.65259	1.98407	2.38149	2.86794	3.35695	3.94377	4.53774	5.31195	6.24566	7.41578	8.8793	11.0304	13.5374	15.9961	18.8659	21.8197	25.2435	29.7651	35.3142	42.1388	52.7383	70.6037	149.572
0.348029	0.696058	1.01467	1.33577	1.65331	1.98407	2.38752	2.86992	3.37796	3.94518	4.54038	5.31243	6.25219	7.41963	8.89008	11.0467	13.5553	16.0433	18.9092	21.8691	25.2555	29.8015	35.3302	42.1417	52.756	70.6729	150.088
0.348029	0.696058	1.01467	1.33797	1.65388	1.98407	2.40101	2.86992	3.38054	3.94518	4.56893	5.31243	6.25364	7.41963	8.89008	11.0523	13.5731	16.0433	18.9092	21.8691	25.2561	29.8069	35.3365	42.1539	52.7778	70.7056	150.178
0.348029	0.696058	1.01467	1.33939	1.66395	1.98407	2.41961	2.86992	3.38612	3.94717	4.56971	5.31243	6.26452	7.42222	8.89008	11.0551	13.5882	16.0557	18.9236	21.8747	25.2723	29.8454	35.346	42.1579	52.7818	70.742	150.504
0.348029	0.696058	1.01467	1.3411	1.66488	1.98407	2.42374	2.86992	3.40647	3.95353	4.57376	5.31243	6.26984	7.44001	8.89349	11.0605	13.5885	16.0605	18.9412	21.902	25.2948	29.8669	35.3602	42.1674	52.8575	70.7865	150.635
0.348029	0.696058	1.01467	1.34222	1.66713	1.98407	2.42374	2.87106	3.41731	3.96814	4.57761	5.31243	6.27418	7.44001	8.89349	11.0731	13.5979	16.0641	18.9549	21.9023	25.2974	29.8839	35.3727	42.1848	53.0207	70.9369	150.704
0.348029	0.696058	1.01467	1.34476	1.6674	1.98407	2.42374	2.87603	3.41884	3.96814	4.57761	5.31243	6.28865	7.44001	8.89349	11.0742	13.6063	16.0698	18.9556	21.9079	25.3285	29.9009	35.4043	42.1977	53.0936	70.9664	150.759
0.348029	0.696058	1.01467	1.34671	1.67238	1.98407	2.42374	2.87766	3.41884	3.96814	4.57761	5.31243	6.29707	7.4434	8.8943	11.0742	13.6074	16.0923	18.9719	21.9245	25.3297	29.9119	35.4154	42.2485	53.1181	71.0056	151.353
0.348029	0.696058	1.01467	1.35014	1.67519	1.98407	2.42374	2.88045	3.42769	3.96814	4.58579	5.31577	6.29941	7.44528	8.90177	11.1467	13.6443	16.1093	18.9748	21.9342	25.3775	29.9517	35.4452	42.2859	53.1437	71.0227	151.677
0.348029	0.696058	1.01467	1.35019	1.68416	1.98407	2.42374	2.88045	3.42769	3.96814	4.59416	5.34309	6.30308	7.44554	8.9244	11.1722	13.651	16.1224	18.9833	21.9373	25.3906	29.9661	35.4541	42.3036	53.1521	71.0632	151.716
0.348029	0.696058	1.01467	1.35089	1.68604	1.98407	2.42374	2.88045	3.42769	3.96814	4.59741	5.37477	6.30308	7.44815	8.94562	11.1858	13.6687	16.1402	18.9875	21.9415	25.4037	29.9778	35.4646	42.3374	53.1614	71.1534	152.801
0.348029	0.696058	1.01467	1.35466	1.68665	1.98407	2.42374	2.8885	3.42769	3.96814	4.59741	5.37477	6.30788	7.44815	8.95795	11.2059	13.6687	16.1487	19.0703	21.9507	25.4848	30.0062	35.487	42.4774	53.2524	71.1892	153.971
0.348029	0.696058	1.01467	1.35524	1.68736	1.98407	2.42374	2.88915	3.42887	3.97415	4.59741	5.39579	6.3173	7.4555	8.95795	11.2074	13.6776	16.1563	19.0723	22.014	25.5274	30.0244	35.5416	42.5023	53.3673	71.2196	154.281
0.348029	0.696058	1.01467	1.35676	1.68781	1.98407	2.42374	2.8927	3.43112	3.97577	4.59741	5.39726	6.31906	7.4725	8.95795	11.2236	13.6855	16.17	19.102	22.014	25.5333	30.0278	35.5416	42.5232	53.3923	71.3638	155.211
0.348029	0.696058	1.01467	1.36405	1.69393	1.98407	2.42374	2.89355	3.43922	3.97577	4.59741	5.39726	6.32228	7.47816	8.99852	11.2246	13.6975	16.1843	19.106	22.025	25.5476	30.0499	35.5705	42.5465	53.4228	71.3689	155.634
0.348029	0.696058	1.01467	1.36594	1.69445	1.98407	2.42374	2.90557	3.44531	3.97577	4.60278	5.39973	6.32705	7.48465	9.01187	11.2344	13.7045	16.1843	19.1969	22.025	25.566	30.083	35.608	42.5657	53.4261	71.4541	155.989
0.348029	0.696058	1.01467	1.36795	1.69844	1.98407	2.42376	2.91115	3.44531	3.97577	4.61124	5.39994	6.32705	7.48465	9.01187	11.256	13.7585	16.1936	19.2205	22.0402	25.5682	30.0954	35.6292	42.5796	53.4296	71.7788	157.339
0.348029	0.696058	1.01467	1.36802	1.69981	1.98407	2.42664	2.91462	3.44531	3.97577	4.61236	5.40286	6.3294	7.48465	9.02293	11.2694	13.7599	16.2067	19.2523	22.0493	25.5772	30.104	35.6454	42.6034	53.4443	71.7936	158.54
0.348029	0.696274	1.01865	1.36827	1.70181	1.99323	2.43142	2.91464	3.45032	3.97701	4.61394	5.41406	6.33771	7.49304	9.02866	11.2908	13.7747	16.2422	19.2536	22.0841	25.6044	30.1292	35.6692	42.6412	53.4681	71.8632	159.501
0.348029	0.697185	1.01877	1.37152	1.70218	1.9935	2.43371	2.92141	3.45409	3.97805	4.62368	5.41965	6.35094	7.49678	9.03669	11.2969	13.7834	16.2496	19.2677	22.094	25.6233	30.1292	35.6734	42.6616	53.5422	71.9074	159.716
0.348029	0.697646	1.01878	1.37163	1.70474	1.99353	2.4362	2.92381	3.45409	3.98624	4.62368	5.41965	6.36146	7.49678	9.04876	11.323	13.7922	16.2496	19.2856	22.0976	25.6294	30.1378	35.7209	42.6645	53.6067	71.9815	161.301
0.348029	0.698085	1.01987	1.37443	1.71792	1.99636	2.4362	2.92934	3.45409	4.00529	4.62368	5.41965	6.36427	7.51863	9.04876	11.3444	13.8164	16.2887	19.2913	22.1005	25.6517	30.1563	35.7345	42.7644	53.6157	72.0868	161.637
0.348029	0.698518	1.02004	1.37526	1.7192	1.99982	2.4362	2.93971	3.45409	4.00612	4.62368	5.42191	6.36874	7.52418	9.05286	11.3847	13.831	16.3007	19.296	22.1211	25.6894	30.17	35.7391	42.7644	53.6603	72.1214	169.066
0.348029	0.69886	1.02189	1.37727	1.72266	1.99982	2.4362	2.9426	3.45409	4.00612	4.62442	5.43456	6.38897	7.52902	9.05545	11.3967	13.8361	16.3017	19.3292	22.1348	25.7131	30.2379	35.7523	42.7793	54.0029	72.1999	185.302
0.348029	0.699711	1.02272	1.37773	1.72266	2.00725	2.4368	2.94298	3.45489	4.00612	4.627	5.43639	6.41734	7.52902	9.07549	11.4003	13.8558	16.3165	19.3305	22.1676	25.7609	30.2594	35.7538	42.8268	54.1658	72.2144	185.372
0.348029	0.699922	1.02272	1.38055	1.72266	2.00882	2.44298	2.94399	3.46481	4.00612	4.63469	5.44752	6.4251	7.53304	9.07549	11.4402	13.8601	16.3184	19.3317	22.1676	25.7787	30.2655	35.7588	42.9227	54.3652	72.3532	185.528
0.348029	0.70002	1.02272	1.38222	1.72266	2.01156	2.4447	2.9527	3.47594	4.00612	4.64279	5.44752	6.43489	7.54549	9.07549	11.4481	13.8734	16.3333	19.3324	22.1703	25.7929	30.2805	35.7675	42.9256	54.3839	72.6577	185.654
0.348029	0.700116	1.02616	1.38429	1.72266	2.01425	2.44519	2.95312	3.47978	4.00612	4.64329	5.44752	6.44089	7.5491	9.10526	11.4612	13.8798	16.3477	19.354	22.1717	25.7969	30.2965	35.7684	42.9636	54.4005	72.716
0.348029	0.700398	1.02756	1.38507	1.72266	2.01569	2.44612	2.95342	3.48029	4.00612	4.65524	5.45065	6.44424	7.55389	9.10879	11.4902	13.8798	16.3611	19.3712	22.1777	25.8023	30.3125	35.7853	43.0101	54.4273	72.7387
0.348029	0.701583	1.02851	1.38602	1.72266	2.01601	2.44743	2.95737	3.48029	4.00612	4.65916	5.46417	6.45967	7.55887	9.13535	11.506	13.8798	16.373	19.3769	22.2014	25.8058	30.3241	35.7861	43.0326	54.5118	72.7456
0.348029	0.701583	1.02882	1.38636	1.72266	2.01664	2.44857	2.95793	3.48029	4.00612	4.66689	5.46417	6.45967	7.58144	9.14529	11.5271	13.8896	16.3907	19.3957	22.2112	25.8087	30.3668	35.7961	43.0333	54.569	72.9052
0.348029	0.702835	1.0303	1.39212	1.72266	2.02543	2.44889	2.96336	3.48029	4.00612	4.6693	5.46417	6.4702	7.58323	9.14529	11.5271	13.895	16.42	19.3962	22.2358	25.8153	30.3903	35.8132	43.071	54.5774	72.9688
0.348029	0.703488	1.03109	1.39212	1.72266	2.02579	2.45554	2.96336	3.48029	4.01297	4.6693	5.47187	6.47372	7.59709	9.15852	11.5271	13.9019	16.4399	19.4339	22.2535	25.8185	30.3961	35.817	43.0917	54.7026	72.997
0.348029	0.70476	1.03279	1.39212	1.72266	2.02764	2.46094	2.96336	3.49109	4.01775	4.67615	5.49429	6.47559	7.59709	9.15852	11.5323	13.926	16.4423	19.4361	22.2535	25.8241	30.4172	35.8428	43.0945	54.7041	72.9982
0.348029	0.705062	1.03334	1.39212	1.72266	2.02888	2.46094	2.96336	3.49765	4.02591	4.67783	5.50282	6.47631	7.59757	9.16514	11.5426	13.9346	16.4494	19.4414	22.262	25.8387	30.4237	35.847	43.1001	54.7303	73.0478
0.348029	0.705903	1.03674	1.39212	1.72338	2.02934	2.46094	2.96336	3.49765	4.02804	4.68225	5.50282	6.49201	7.60107	9.18725	11.5603	13.9386	16.4515	19.443	22.2748	25.8398	30.4347	35.9001	43.1423	54.8044	73.0965
0.348029	0.707244	1.03839	1.39343	1.72705	2.02934	2.46094	2.96336	3.49765	4.02843	4.68516	5.51229	6.49374	7.60107	9.18823	11.569	13.9776	16.4583	19.4476	22.2847	25.8457	30.4401	35.9373	43.1591	54.8352	73.1002
0.348029	0.708399	1.03844	1.39468	1.7286	2.02934	2.46094	2.96336	3.49765	4.03439	4.68672	5.51323	6.49706	7.62909	9.18975	11.5847	13.98	16.4614	19.4499	22.2969	25.8586	30.4801	35.938	43.1781	54.8717	73.1772
0.348029	0.709157	1.03844	1.39591	1.72991	2.02934	2.46094	2.96336	3.50437	4.03791	4.69015	5.52197	6.49706	7.6308	9.19482	11.5978	13.9976	16.4633	19.4811	22.3133	25.8586	30.5246	35.971	43.1851	54.8839	73.1863
0.348029	0.709269	1.0429	1.39596	1.73126	2.02934	2.46094	2.96336	3.52353	4.04911	4.70161	5.52342	6.49706	7.63287	9.19482	11.6082	14.0147	16.4723	19.4896	22.32	25.8691	30.5365	36.0076	43.1928	54.9841	73.3558
0.348029	0.711177	1.04409	1.39672	1.73387	2.02934	2.46094	2.96336	3.52353	4.05868	4.70161	5.53027	6.50172	7.63287	9.19819	11.6082	14.0217	16.4881	19.4974	22.3295	25.8691	30.655	36.0214	43.2348	55.0414	73.4007
0.348029	0.711566	1.04409	1.39686	1.73533	2.02934	2.46094	2.96336	3.52353	4.05868	4.70161	5.53027	6.50172	7.63287	9.22441	11.6138	14.0295	16.4897	19.5157	22.3328	25.9369	30.6582	36.0503	43.2348	55.1124	73.5528
0.348029	0.712162	1.04409	1.39709	1.7371	2.02934	2.46094	2.96336	3.52353	4.05868	4.72731	5.5424	6.50413	7.64477	9.26372	11.616	14.0295	16.4901	19.5904	22.3512	25.9474	30.6817	36.0508	43.2844	55.1299	73.587
0.348029	0.712345	1.04409	1.39787	1.73924	2.02934	2.46094	2.96336	3.52353	4.06958	4.72731	5.55213	6.51094	7.64477	9.26372	11.6186	14.036	16.4901	19.595	22.3514	25.9693	30.7042	36.0566	43.2936	55.1437	73.7809
0.348029	0.712566	1.04409	1.3997	1.74015	2.02934	2.46094	2.97356	3.52353	4.07358	4.72731	5.55213	6.51568	7.64591	9.27398	11.6603	14.0618	16.4903	19.595	22.3999	25.9754	30.7249	36.1188	43.3237	55.1536	73.8597
0.348029	0.712567	1.04409	1.40171	1.74015	2.02934	2.46094	2.97356	3.52353	4.07358	4.7304	5.56681	6.51942	7.65664	9.29762	11.6603	14.0941	16.5176	19.6531	22.4044	26.008	30.7332	36.1724	43.3251	55.2704	73.8691
0.348029	0.712636	1.04409	1.40477	1.74015	2.03175	2.46094	2.97356	3.52353	4.07358	4.73371	5.58452	6.52996	7.66332	9.30821	11.6641	14.0963	16.5176	19.6583	22.4098	26.0188	30.7461	36.2327	43.3484	55.2752	74.0541
0.348029	0.713025	1.04409	1.40607	1.74015	2.03433	2.4626	2.98069	3.52353	4.07358	4.73371	5.59929	6.53375	7.66455	9.3386	11.6672	14.1027	16.5192	19.669	22.4108	26.036	30.7627	36.2327	43.3551	55.4913	74.131
0.348029	0.713735	1.04409	1.4081	1.74015	2.0408	2.46776	2.98108	3.52353	4.07358	4.73371	5.60747	6.5666	7.66455	9.34283	11.6707	14.12	16.5378	19.676	22.4148	26.0371	30.7724	36.3053	43.3827	55.6221	74.1837
0.348029	0.714515	1.04409	1.40857	1.74015	2.04251	2.46783	2.98223	3.52353	4.07358	4.73371	5.60803	6.56915	7.67784	9.3548	11.6707	14.13	16.5762	19.7013	22.452	26.0526	30.8307	36.3128	43.3865	55.6433	74.3391
0.348029	0.715754	1.04409	1.41372	1.74015	2.04283	2.46858	2.98376	3.52353	4.07358	4.73371	5.6087	6.59758	7.69376	9.3548	11.6809	14.1327	16.5822	19.7029	22.4607	26.065	30.8315	36.3128	43.4375	55.6685	74.4141
0.348029	0.715912	1.04409	1.4169	1.74015	2.04296	2.47245	2.98411	3.52353	4.07358	4.73371	5.6118	6.59993	7.70544	9.36451	11.6865	14.1392	16.5885	19.7086	22.4647	26.0732	30.8835	36.329	43.4521	55.7091	74.4429
0.348029	0.716457	1.04409	1.41778	1.74015	2.05727	2.47321	2.98688	3.5329	4.09582	4.74528	5.6118	6.62171	7.72358	9.36451	11.6914	14.1477	16.5908	19.7225	22.4809	26.0836	30.911	36.3303	43.4716	56.1163	74.4429
0.348029	0.71748	1.04409	1.41905	1.74015	2.06251	2.47321	2.99386	3.54444	4.09582	4.75286	5.6118	6.62628	7.7275	9.37097	11.7102	14.1477	16.6054	19.7259	22.4903	26.1477	30.932	36.3428	43.4911	56.1747	74.5729
0.348029	0.717659	1.04409	1.41905	1.74015	2.07005	2.47321	2.99386	3.54828	4.09582	4.75286	5.6118	6.62628	7.74536	9.40323	11.7328	14.1856	16.6176	19.7428	22.493	26.1485	30.9384	36.3503	43.4982	56.2292	74.6184
0.348029	0.720316	1.04409	1.4219	1.74015	2.07163	2.47321	2.99386	3.54921	4.104	4.75286	5.6118	6.63561	7.74875	9.40687	11.7328	14.1969	16.6418	19.7673	22.4971	26.1648	30.988	36.362	43.5112	56.2431	74.6378
0.348029	0.721092	1.04409	1.42318	1.74015	2.07264	2.47321	2.99386	3.54921	4.11221	4.75286	5.6118	6.63679	7.77061	9.41932	11.7637	14.213	16.6546	19.7848	22.4971	26.1671	30.9922	36.3969	43.5147	56.3781	74.7193
0.348029	0.72207	1.04409	1.42602	1.74015	2.07638	2.48047	2.99386	3.54921	4.11879	4.75955	5.61719	6.64208	7.78034	9.41932	11.7843	14.2211	16.6654	19.7888	22.5441	26.1825	31.0112	36.4227	43.5469	56.3825	74.761
0.348029	0.72301	1.04585	1.42625	1.74015	2.07899	2.4901	2.99386	3.5606	4.12528	4.76262	5.61719	6.64909	7.78669	9.46742	11.8148	14.2226	16.6765	19.8178	22.5566	26.1937	31.0149	36.4251	43.5621	56.4027	74.8695
0.348029	0.723095	1.04712	1.42694	1.74015	2.0808	2.49556	3.00396	3.56102	4.12528	4.76862	5.61822	6.66274	7.79998	9.47358	11.8151	14.2246	16.7289	19.8205	22.5616	26.1971	31.0595	36.4294	43.5666	56.4049	75.0102
0.348029	0.723815	1.04956	1.43043	1.74015	2.08244	2.49902	3.00396	3.57079	4.12528	4.76905	5.6501	6.67887	7.81711	9.47718	11.8381	14.2586	16.738	19.8621	22.5683	26.215	31.116	36.4626	43.6614	56.4328	75.0598
0.348029	0.724257	1.05204	1.4314	1.74015	2.08357	2.50147	3.00396	3.57812	4.12528	4.77533	5.65634	6.67887	7.82098	9.49616	11.8681	14.2734	16.7507	19.8727	22.5683	26.226	31.1174	36.4626	43.6641	56.5738	75.1699
0.348029	0.726529	1.05237	1.43496	1.74015	2.08362	2.50217	3.00921	3.58318	4.12528	4.77828	5.66178	6.68542	7.82098	9.49716	11.87	14.2836	16.7579	19.8859	22.6158	26.2353	31.1258	36.4626	43.6667	56.5978	75.1844
0.348029	0.727307	1.05427	1.43496	1.74466	2.08704	2.50838	3.01027	3.58318	4.12528	4.77828	5.6655	6.69447	7.82098	9.49935	11.9044	14.2925	16.7633	19.9214	22.6527	26.2595	31.1384	36.4626	43.6909	56.6239	75.2016
0.348029	0.727844	1.05591	1.43496	1.74492	2.08817	2.50967	3.01792	3.58318	4.12605	4.77828	5.6655	6.69447	7.83201	9.57238	11.9374	14.3073	16.7723	19.923	22.662	26.2662	31.2161	36.4767	43.6912	56.6406	75.2423
0.348029	0.728048	1.05618	1.43496	1.74492	2.08817	2.50967	3.02536	3.58318	4.13782	4.77828	5.6655	6.69629	7.8327	9.57238	11.9374	14.3117	16.794	19.9329	22.6647	26.3382	31.2268	36.4973	43.7092	56.6561	75.2717
0.348029	0.728276	1.05641	1.43496	1.74815	2.08817	2.50967	3.0272	3.58429	4.14074	4.77828	5.6655	6.70311	7.84804	9.57238	11.9476	14.3137	16.7958	19.9397	22.6684	26.3522	31.2323	36.5165	43.7535	56.7049	75.3036
0.348029	0.729576	1.05849	1.43496	1.75099	2.08817	2.50967	3.04044	3.60524	4.14282	4.79058	5.6655	6.71705	7.8576	9.58503	11.9603	14.3179	16.7974	19.9397	22.6687	26.3671	31.2668	36.5223	43.7637	56.7198	75.3111
0.348029	0.734483	1.05972	1.43496	1.75262	2.09683	2.50967	3.04401	3.61162	4.14287	4.82692	5.68074	6.71705	7.86202	9.58503	11.9754	14.32	16.8552	19.9437	22.6824	26.37	31.2757	36.5389	43.8192	56.7624	75.3373
0.348029	0.735065	1.06155	1.43496	1.75396	2.09929	2.50967	3.04401	3.6126	4.1499	4.83022	5.68152	6.72156	7.86346	9.59766	11.9754	14.3348	16.8588	19.9442	22.6887	26.3732	31.2924	36.5389	43.8441	56.8461	75.3389
0.348029	0.736084	1.06174	1.43496	1.75622	2.10263	2.50967	3.04401	3.61411	4.15112	4.83498	5.68152	6.72156	7.87884	9.61027	11.9855	14.3348	16.8599	19.9769	22.6967	26.3814	31.3205	36.6556	43.8474	56.8903	75.3389
0.348029	0.736775	1.0625	1.43496	1.75686	2.10263	2.50967	3.04401	3.63123	4.1518	4.83498	5.70181	6.7575	7.89037	9.62486	11.9971	14.3348	16.869	20.0124	22.7261	26.4113	31.33	36.668	43.8586	56.8936	75.4497
0.348029	0.737121	1.06345	1.43496	1.75691	2.10263	2.51386	3.04401	3.63353	4.16463	4.83498	5.7081	6.77036	7.89037	9.62601	11.9982	14.3369	16.8803	20.0305	22.7487	26.4136	31.3794	36.7001	43.8606	56.895	75.4609
0.348029	0.737659	1.06411	1.43496	1.75727	2.10263	2.51727	3.05133	3.63353	4.17215	4.84748	5.72399	6.77036	7.9001	9.71057	12.0007	14.3875	16.8821	20.0321	22.758	26.425	31.432	36.7056	43.8844	56.9731	75.5039
0.348435	0.737754	1.06518	1.43496	1.76001	2.10263	2.51742	3.05779	3.63353	4.17635	4.8562	5.72399	6.78639	7.90953	9.74482	12.0007	14.3995	16.8875	20.0443	22.7913	26.4468	31.4548	36.7305	43.8917	57.0014	75.5635
0.348624	0.738281	1.06576	1.43496	1.76366	2.10263	2.52019	3.06308	3.64126	4.17924	4.87106	5.72399	6.78648	7.93628	9.76964	12.0083	14.4023	16.9104	20.0471	22.8138	26.4651	31.5225	36.7363	43.8965	57.3447	75.7253
0.34869	0.738281	1.06598	1.43496	1.76524	2.10263	2.5333	3.06506	3.64277	4.18289	4.87798	5.72443	6.80662	7.95481	9.7975	12.0413	14.4443	16.9152	20.049	22.8337	26.4834	31.5409	36.7529	43.9131	57.4659	75.7293
0.348884	0.738281	1.06663	1.43496	1.76936	2.10263	2.53369	3.07215	3.64608	4.18359	4.88596	5.73984	6.80662	7.97003	9.80677	12.0429	14.459	16.9455	20.0895	22.8761	26.4854	31.566	36.7595	43.9351	57.4728	75.7907
0.348952	0.738281	1.06776	1.43496	1.76962	2.10263	2.53369	3.07235	3.65788	4.18359	4.88733	5.74512	6.81113	7.97055	9.80677	12.0901	14.4778	16.9519	20.0895	22.8867	26.5296	31.5691	36.7654	43.9413	57.5053	75.8113
0.34946	0.738281	1.0681	1.43496	1.77041	2.10263	2.53369	3.07302	3.65845	4.18359	4.88806	5.74512	6.81946	8.00467	9.83101	12.0925	14.4945	16.9823	20.1004	22.9013	26.5374	31.5864	36.7678	43.9426	57.5081	75.8465
0.350562	0.738281	1.07139	1.43643	1.77461	2.10263	2.53369	3.07747	3.65845	4.18359	4.89138	5.74512	6.82467	8.01601	9.83637	12.1062	14.4957	17.025	20.1512	22.9077	26.5468	31.6353	36.8097	43.971	57.5084	75.8616
0.350791	0.738281	1.07187	1.43867	1.77461	2.10475	2.53369	3.08262	3.65845	4.19083	4.89225	5.74512	6.84211	8.01857	9.8454	12.1249	14.5279	17.0534	20.1896	22.9515	26.5793	31.6618	36.873	44.0143	57.5723	75.8692
0.350791	0.738281	1.07316	1.4406	1.77461	2.10569	2.53369	3.08355	3.65845	4.19083	4.90338	5.74512	6.84482	8.03312	9.92725	12.1361	14.5551	17.0641	20.2037	22.9515	26.5813	31.6758	36.873	44.0845	57.6189	76.4437
0.350791	0.738281	1.0748	1.44094	1.77461	2.10744	2.53369	3.08355	3.65845	4.19083	4.90338	5.74512	6.84684	8.03406	9.93256	12.1488	14.5716	17.0681	20.2336	22.9607	26.622	31.7014	36.8788	44.1009	57.6196	76.4797
0.350791	0.738281	1.0789	1.44154	1.77461	2.10962	2.53369	3.08355	3.65845	4.19468	4.91524	5.76091	6.85079	8.03488	9.93256	12.1528	14.6089	17.0718	20.2336	22.9829	26.6362	31.7873	36.8927	44.1197	57.6343	76.5018
0.350791	0.738281	1.07995	1.4456	1.77461	2.11209	2.53369	3.08355	3.65845	4.20525	4.92188	5.76091	6.85611	8.04617	9.95388	12.1561	14.6734	17.0729	20.2367	22.9871	26.6484	31.8165	36.8998	44.1524	57.6432	76.8265
0.350791	0.738281	1.08046	1.44635	1.77461	2.11698	2.53369	3.08849	3.65845	4.20539	4.92188	5.76616	6.86421	8.06121	9.95692	12.1583	14.6915	17.0797	20.2443	22.9871	26.6514	31.8375	36.9141	44.1771	57.6522	76.8621
0.350791	0.738281	1.08086	1.44635	1.77461	2.11698	2.53369	3.08859	3.65845	4.20716	4.92188	5.77209	6.87189	8.06121	9.96241	12.1701	14.7184	17.1208	20.2486	22.9936	26.6521	31.8746	36.9319	44.1798	57.7204	76.9388
0.351073	0.738281	1.08207	1.44635	1.77461	2.11698	2.53369	3.09283	3.65845	4.20863	4.92802	5.78738	6.89062	8.07248	9.96505	12.2009	14.7266	17.1311	20.2691	23.0042	26.6538	31.8963	36.9384	44.2777	57.7225	77.0207
0.351293	0.738281	1.08364	1.44783	1.77461	2.11698	2.54041	3.0972	3.65845	4.21245	4.92802	5.79071	6.89062	8.07453	9.99909	12.2048	14.743	17.172	20.2934	23.0147	26.7079	31.9054	36.9714	44.2894	57.7398	77.0435
0.351305	0.738281	1.08366	1.44856	1.77461	2.11698	2.54338	3.10205	3.65845	4.21245	4.94287	5.79236	6.89159	8.10688	10.0417	12.2157	14.743	17.221	20.2934	23.0699	26.8016	31.9249	36.9801	44.2914	57.8509	77.0474
0.351649	0.738281	1.0846	1.45213	1.77461	2.11698	2.54362	3.10208	3.65845	4.21405	4.94642	5.79236	6.89247	8.11736	10.0417	12.2183	14.743	17.2266	20.3009	23.0699	26.8558	31.948	37.0582	44.3097	57.9095	77.0728
0.351878	0.738281	1.08537	1.45619	1.77461	2.11698	2.54575	3.10228	3.65845	4.22048	4.94642	5.79236	6.89502	8.11736	10.0417	12.2191	14.7513	17.2353	20.3161	23.0955	26.8592	31.9509	37.0622	44.314	57.9163	77.0898
0.35211	0.738281	1.09352	1.45675	1.77461	2.11698	2.55132	3.10802	3.65845	4.22391	4.94642	5.79558	6.89502	8.12482	10.0498	12.2347	14.7707	17.2603	20.3292	23.0988	26.8648	31.9745	37.0666	44.3183	57.9764	77.142
0.352362	0.738281	1.09363	1.45889	1.77628	2.11698	2.5538	3.11287	3.65845	4.22988	4.94642	5.8009	6.89502	8.12482	10.0898	12.261	14.7861	17.2827	20.3545	23.1017	26.8839	31.996	37.0915	44.3631	58.0625	77.1629
0.352473	0.738281	1.09397	1.45923	1.77886	2.11698	2.55567	3.11287	3.66566	4.23396	4.95254	5.80802	6.89502	8.12482	10.0928	12.2735	14.8004	17.2827	20.3664	23.138	26.9014	32.0661	37.1241	44.4032	58.1136	77.2127
0.354294	0.738281	1.09403	1.45989	1.78155	2.11779	2.55606	3.11287	3.66911	4.23396	4.95254	5.80802	6.89502	8.13974	10.0928	12.2874	14.8066	17.2887	20.3808	23.1655	26.9048	32.067	37.1267	44.5457	58.2203	77.277
0.356174	0.738281	1.09453	1.46589	1.78205	2.11931	2.55646	3.11287	3.67114	4.23443	4.97694	5.81297	6.90979	8.14715	10.0971	12.3047	14.8094	17.3684	20.3961	23.1825	26.9086	32.0688	37.1408	44.5457	58.2302	77.3502
0.356563	0.738281	1.09548	1.46862	1.78356	2.13185	2.55686	3.11287	3.6776	4.24588	4.97694	5.84958	6.9155	8.14715	10.0988	12.322	14.8576	17.411	20.3961	23.2217	26.9335	32.0857	37.2017	44.5919	58.3143	77.5211
0.356819	0.738281	1.09852	1.46976	1.78814	2.14192	2.56125	3.11287	3.67889	4.24817	4.98022	5.84958	6.93006	8.14715	10.1018	12.3232	14.8658	17.4571	20.408	23.2321	26.9566	32.1282	37.2017	44.5961	58.364	77.6074
0.356874	0.738281	1.0989	1.4709	1.78869	2.14536	2.56198	3.11379	3.68534	4.24824	4.98302	5.85337	6.93006	8.14834	10.1377	12.3337	14.8774	17.4882	20.435	23.3789	26.9819	32.1414	37.2077	44.5973	58.4502	77.7672
0.357131	0.738281	1.10056	1.47251	1.79089	2.15091	2.5624	3.11649	3.68576	4.24941	4.98302	5.8609	6.93735	8.15087	10.1467	12.3352	14.88	17.5021	20.4557	23.3996	26.9863	32.1522	37.2448	44.6034	58.4678	77.8754
0.357318	0.738281	1.10056	1.47253	1.79159	2.15139	2.56245	3.127	3.69141	4.26175	4.98302	5.87025	6.96058	8.18054	10.1467	12.3369	14.8818	17.5759	20.485	23.4407	27.0233	32.1983	37.3098	44.6435	58.4823	77.8812
0.357363	0.738281	1.10056	1.47583	1.79159	2.15483	2.56262	3.13161	3.69141	4.26785	4.98302	5.87025	6.96493	8.18054	10.1467	12.3576	14.8983	17.5884	20.5191	23.4589	27.03	32.2063	37.3171	44.657	58.5786	78.061
0.35797	0.738281	1.10056	1.47656	1.79159	2.15489	2.56591	3.13757	3.696	4.27614	4.98302	5.87135	6.96493	8.18054	10.1735	12.3661	14.9098	17.6125	20.5455	23.481	27.0535	32.3526	37.356	44.678	58.668	78.1256
0.358	0.738281	1.10056	1.47656	1.79159	2.15761	2.56929	3.14641	3.6962	4.27685	4.98302	5.91137	6.96493	8.18054	10.1806	12.3661	14.9187	17.6176	20.5455	23.4836	27.0703	32.3742	37.3616	44.6822	58.7133	78.1324
0.35809	0.738281	1.10056	1.47656	1.79159	2.16618	2.56929	3.14719	3.69647	4.28195	4.98302	5.91137	6.96928	8.21378	10.1973	12.3662	14.9693	17.6176	20.558	23.4836	27.1114	32.3798	37.4218	44.701	58.7376	78.235
0.358793	0.738281	1.10056	1.47656	1.79159	2.17651	2.56929	3.15154	3.6996	4.28567	4.98302	5.91443	6.97559	8.22483	10.1973	12.3689	14.9814	17.6241	20.5661	23.5544	27.1439	32.3868	37.4354	44.7118	58.7685	78.2539
0.358987	0.738281	1.10056	1.47656	1.79159	2.17996	2.56929	3.15154	3.6996	4.29395	4.98316	5.9165	6.98506	8.25424	10.1973	12.3714	14.9814	17.6374	20.5735	23.5557	27.1879	32.4051	37.4354	44.7302	58.825	78.3135
0.359559	0.738281	1.10056	1.47656	1.79159	2.18404	2.56929	3.15154	3.70621	4.29784	4.98545	5.9165	7.00696	8.27256	10.2041	12.376	14.9814	17.6393	20.5912	23.5575	27.192	32.4478	37.4505	44.8499	58.8273	78.3197
0.359594	0.738281	1.10056	1.47656	1.79159	2.1843	2.56929	3.15154	3.71234	4.29784	5.00616	5.91776	7.00909	8.29926	10.2092	12.38	14.9936	17.6723	20.5912	23.5909	27.2276	32.5524	37.4839	44.9052	58.8477	78.3696
0.359918	0.738281	1.10056	1.47656	1.79159	2.18442	2.56929	3.15598	3.72407	4.29784	5.01462	5.92672	7.011	8.31636	10.2111	12.385	15.0117	17.7007	20.5961	23.6021	27.2409	32.5886	37.4965	44.9121	58.8581	78.3943
0.359944	0.738281	1.10056	1.47656	1.79159	2.18482	2.56929	3.15712	3.72407	4.29784	5.01935	5.92672	7.03845	8.32728	10.2358	12.4075	15.0137	17.7341	20.6044	23.658	27.2596	32.5933	37.5073	44.9162	58.9565	78.4456
0.360362	0.738281	1.10056	1.47656	1.79159	2.18486	2.56929	3.15787	3.72896	4.29784	5.01935	5.92672	7.03845	8.32728	10.2545	12.4321	15.0299	17.7461	20.6132	23.6634	27.3102	32.6035	37.5281	44.984	58.9747	78.4581
0.360495	0.738281	1.10056	1.47679	1.79159	2.18703	2.56929	3.158	3.73028	4.29784	5.01935	5.93861	7.04705	8.32728	10.2707	12.4333	15.0321	17.7461	20.6132	23.6669	27.3241	32.6143	37.5389	44.9982	59.0057	78.4765
0.360573	0.738281	1.10056	1.48073	1.79159	2.18935	2.56929	3.16041	3.73524	4.29784	5.04141	5.94712	7.05135	8.33493	10.304	12.4369	15.0359	17.7614	20.6132	23.67	27.3264	32.6151	37.5565	45.0106	59.0499	78.5008
0.361585	0.738281	1.10056	1.48269	1.79159	2.19044	2.56929	3.16416	3.74388	4.29784	5.04255	5.94712	7.05518	8.35995	10.3623	12.442	15.044	17.7755	20.6132	23.6704	27.3563	32.6258	37.5888	45.0325	59.1184	78.6303
0.361614	0.738281	1.10056	1.48765	1.79159	2.19447	2.56929	3.17482	3.74839	4.29784	5.04489	5.95221	7.07052	8.35995	10.3654	12.4442	15.044	17.7818	20.6275	23.6888	27.4502	32.6304	37.5903	45.0728	59.1445	78.7304
0.361765	0.738281	1.10056	1.48779	1.79159	2.19516	2.57495	3.17684	3.74839	4.29784	5.04942	5.95221	7.08704	8.36012	10.4293	12.481	15.0519	17.8065	20.6572	23.6946	27.456	32.6368	37.6033	45.0802	59.2133	78.7596
0.362464	0.738281	1.10056	1.48893	1.79159	2.19954	2.57791	3.18638	3.74839	4.29784	5.04942	5.95221	7.09843	8.36719	10.4327	12.5049	15.0679	17.8414	20.6812	23.6992	27.4683	32.6401	37.6588	45.0802	59.2596	78.7654
0.363021	0.738281	1.10056	1.48997	1.79159	2.20043	2.5781	3.19776	3.74839	4.30032	5.06738	5.9573	7.09843	8.3997	10.4409	12.5094	15.082	17.8956	20.6851	23.75	27.4752	32.6452	37.6637	45.2724	59.2846	78.7784
0.363363	0.738281	1.10056	1.49091	1.79159	2.20113	2.58975	3.19922	3.74839	4.30041	5.06738	5.96551	7.13672	8.4177	10.4438	12.5275	15.1102	17.9041	20.6953	23.7843	27.4756	32.6874	37.7062	45.3027	59.296	78.8657
0.364521	0.738281	1.10056	1.49235	1.79159	2.20113	2.59169	3.19922	3.74839	4.30488	5.07335	5.98772	7.13983	8.43724	10.4438	12.5484	15.1263	17.9311	20.6953	23.8317	27.4965	32.7078	37.7287	45.3307	59.3426	78.8718
0.364689	0.738281	1.10056	1.49387	1.79263	2.20113	2.59176	3.19922	3.74839	4.30488	5.07335	5.98772	7.14096	8.44713	10.4467	12.5503	15.1304	17.9326	20.7012	23.8478	27.498	32.7238	37.7287	45.3412	59.3591	78.9113
0.364797	0.738281	1.10056	1.49693	1.7933	2.20113	2.59257	3.19922	3.74839	4.30488	5.07335	5.99801	7.15367	8.45909	10.4467	12.5525	15.1403	17.9665	20.7143	23.8749	27.519	32.7527	37.7327	45.3481	59.3663	79.1783
0.365354	0.738281	1.10056	1.49693	1.79421	2.20113	2.59949	3.19922	3.74878	4.31322	5.08592	6.03306	7.15367	8.46791	10.4554	12.5625	15.1623	17.9665	20.7245	23.8914	27.5282	32.7683	37.8107	45.3541	59.4853	79.1952
0.365572	0.738281	1.10056	1.49693	1.79599	2.20113	2.60141	3.19922	3.75478	4.3217	5.08813	6.0382	7.15692	8.47824	10.4576	12.6009	15.1882	17.9665	20.7435	23.8914	27.5328	32.7726	37.8577	45.3781	59.5333	79.3152
0.365598	0.738281	1.10056	1.49693	1.79878	2.20113	2.60265	3.19922	3.75646	4.32231	5.08835	6.04698	7.1748	8.48294	10.4698	12.611	15.1991	17.9679	20.7541	23.8914	27.5636	32.8201	37.8601	45.3913	59.5455	79.3156
0.365853	0.738281	1.10056	1.49693	1.79879	2.20113	2.61386	3.19922	3.75646	4.3229	5.10225	6.04706	7.1748	8.48577	10.4785	12.652	15.2161	17.9761	20.7902	23.9167	27.6064	32.8899	37.8616	45.3915	59.6162	79.4124
0.366594	0.738281	1.10056	1.49693	1.80074	2.20113	2.61413	3.19922	3.75646	4.33195	5.10364	6.07807	7.17916	8.52849	10.4908	12.6627	15.2212	17.9778	20.8149	23.924	27.6294	32.8985	37.91	45.5449	59.6189	79.4429
0.367007	0.738281	1.10056	1.49693	1.80273	2.20113	2.61601	3.20192	3.76451	4.33633	5.11539	6.07807	7.18745	8.52849	10.5124	12.6685	15.2463	17.9783	20.8426	23.9521	27.6349	32.9061	37.928	45.5946	59.6461	79.5294
0.368169	0.738281	1.10056	1.49693	1.80282	2.20113	2.61601	3.20867	3.76451	4.33905	5.1189	6.07807	7.18745	8.54268	10.5131	12.6685	15.2486	17.9905	20.8484	23.9572	27.6349	32.9299	37.9297	45.6078	59.669	79.5629
0.368943	0.738411	1.10056	1.49693	1.80324	2.20113	2.61601	3.20867	3.76451	4.35384	5.12088	6.07974	7.23783	8.59569	10.5131	12.689	15.2604	17.9942	20.8484	23.9713	27.6423	32.9492	37.9475	45.6551	59.6954	79.5853
0.369752	0.738875	1.10056	1.49693	1.80431	2.20113	2.61601	3.20867	3.76451	4.35776	5.12471	6.08802	7.23783	8.59569	10.5214	12.7009	15.2816	18.0506	20.8492	23.9976	27.705	32.9527	38.0415	45.658	59.7052	79.588
0.370494	0.739725	1.10056	1.49693	1.80581	2.20113	2.61601	3.20867	3.76451	4.36079	5.13859	6.09299	7.23941	8.59569	10.5333	12.7019	15.2895	18.0523	20.8498	24.0228	27.7137	32.9547	38.0571	45.6814	59.7395	79.6032
0.37107	0.740642	1.10056	1.49693	1.81772	2.20254	2.61652	3.20867	3.76451	4.36079	5.13859	6.11004	7.24202	8.61328	10.5333	12.7138	15.2994	18.0819	20.8498	24.0241	27.7203	32.9725	38.0759	45.7052	59.8813	79.7903
0.37159	0.74119	1.10056	1.49693	1.82483	2.21155	2.61875	3.20867	3.76451	4.36287	5.13859	6.11284	7.25149	8.65078	10.5438	12.7397	15.2994	18.1314	20.8671	24.0279	27.7213	32.9756	38.1128	45.7423	59.9808	79.8634
0.371764	0.741532	1.10056	1.49693	1.82727	2.21446	2.62038	3.20867	3.77022	4.37682	5.13859	6.11284	7.26781	8.65134	10.5703	12.7613	15.3073	18.1685	20.8859	24.0367	27.7301	32.9922	38.1274	45.7464	59.9907	80.0214
0.371899	0.741988	1.10056	1.49693	1.82952	2.21484	2.62079	3.21008	3.77111	4.37863	5.16797	6.11284	7.28357	8.6653	10.5706	12.7779	15.3172	18.1685	20.9006	24.0367	27.7475	33.0096	38.1477	45.7615	59.9909	80.0656
0.372087	0.743151	1.10056	1.49693	1.83196	2.21484	2.62659	3.21762	3.77454	4.38157	5.16797	6.11284	7.28787	8.66935	10.5935	12.7779	15.3469	18.2208	20.9078	24.0543	27.777	33.0115	38.1985	45.7947	60.0912	80.103
0.372132	0.744141	1.10056	1.49693	1.83658	2.21484	2.62852	3.22017	3.78779	4.38157	5.16797	6.11284	7.29684	8.67245	10.602	12.7992	15.3469	18.2259	20.918	24.1095	27.7998	33.021	38.2313	45.8058	60.111	80.3079
0.372516	0.744141	1.10056	1.49693	1.84109	2.21484	2.63306	3.23686	3.79439	4.40226	5.16797	6.11721	7.30447	8.68164	10.6098	12.8212	15.3488	18.2525	20.918	24.1184	27.801	33.0246	38.2583	45.8058	60.2186	80.5283
0.372725	0.744141	1.10056	1.49693	1.84727	2.21484	2.63483	3.23686	3.80168	4.40226	5.16797	6.15234	7.30447	8.70073	10.6846	12.8347	15.3713	18.2568	20.931	24.1222	27.8636	33.0353	38.267	45.8579	60.2251	80.682
0.373044	0.744141	1.10276	1.49693	1.85132	2.21484	2.63973	3.23686	3.81351	4.404	5.16873	6.15234	7.31689	8.7156	10.7636	12.8469	15.3749	18.3007	20.9541	24.1295	27.9241	33.0435	38.2825	45.8851	60.2437	80.6955
0.373361	0.744141	1.10497	1.49693	1.85238	2.21484	2.64497	3.23686	3.8204	4.42117	5.17382	6.15717	7.31689	8.72158	10.7796	12.8559	15.3764	18.3104	20.9888	24.1385	27.9458	33.1373	38.2945	45.9115	60.2444	80.8814
0.373651	0.744141	1.10524	1.49693	1.85478	2.21484	2.64965	3.23969	3.8204	4.43096	5.17382	6.16709	7.3291	8.72158	10.7861	12.8698	15.3808	18.317	20.9989	24.1623	28.0007	33.1749	38.3472	45.9289	60.2643	80.9166
0.373939	0.745219	1.10548	1.49693	1.85558	2.21484	2.65051	3.24021	3.8204	4.4327	5.17382	6.172	7.33075	8.72853	10.8113	12.8786	15.4452	18.3171	21.0219	24.1683	28.0525	33.2108	38.3562	45.9642	60.3291	81.1143
0.374015	0.746374	1.10909	1.49693	1.85966	2.21484	2.65051	3.25422	3.82053	4.43652	5.17382	6.172	7.33648	8.74355	10.8214	12.8818	15.4742	18.3896	21.0234	24.1736	28.1129	33.2332	38.401	45.9728	60.3517	81.2307
0.374158	0.746777	1.1093	1.49693	1.86256	2.21509	2.65051	3.25673	3.82832	4.43652	5.17382	6.172	7.33765	8.76326	10.8218	12.8818	15.5059	18.4193	21.0234	24.1749	28.1129	33.2518	38.4319	45.9869	60.3537	81.3123
0.37496	0.747452	1.1093	1.49693	1.86627	2.2186	2.65051	3.25757	3.82832	4.43652	5.19135	6.172	7.34168	8.77038	10.8307	12.8895	15.5215	18.4302	21.0263	24.1749	28.1377	33.297	38.4348	46.0545	60.37	81.702
0.375085	0.747672	1.1093	1.49693	1.86627	2.22139	2.65051	3.26454	3.83296	4.43652	5.19135	6.18293	7.34168	8.78386	10.8468	12.8935	15.535	18.4313	21.0342	24.2048	28.1803	33.4344	38.5198	46.0833	60.5118	81.715
0.375193	0.749066	1.1093	1.49693	1.86894	2.22556	2.66191	3.26948	3.83597	4.43652	5.20189	6.18836	7.35626	8.7908	10.8482	12.9123	15.5717	18.4365	21.0622	24.2116	28.2161	33.4371	38.5705	46.1504	60.5155	81.748
0.375238	0.749263	1.1093	1.49693	1.86928	2.2261	2.66191	3.27214	3.842	4.43652	5.20515	6.21113	7.35769	8.79652	10.8578	12.9193	15.573	18.4378	21.0694	24.2387	28.2365	33.4442	38.6181	46.2177	60.5364	81.758
0.375485	0.749362	1.1093	1.49971	1.87373	2.22847	2.66191	3.2744	3.84411	4.43652	5.21463	6.22098	7.3746	8.80524	10.8644	12.9271	15.5741	18.4439	21.0852	24.2469	28.2408	33.4933	38.6331	46.2493	60.5711	81.816
0.375513	0.749618	1.1094	1.50026	1.87419	2.22847	2.66191	3.27531	3.84411	4.43849	5.22044	6.22098	7.38691	8.80782	10.8978	12.9892	15.581	18.457	21.091	24.2538	28.2484	33.4946	38.6358	46.2617	60.6031	81.8353
0.375677	0.75506	1.10962	1.50521	1.87419	2.22847	2.66191	3.27575	3.84411	4.4458	5.22044	6.22508	7.3992	8.80842	10.9006	12.9932	15.5838	18.457	21.1117	24.2636	28.2819	33.4983	38.6375	46.2879	60.611	82.1504
0.375743	0.75944	1.11824	1.50589	1.87419	2.22847	2.66191	3.27736	3.84411	4.44657	5.22044	6.22573	7.41396	8.81139	10.9228	12.9941	15.5838	18.4624	21.1254	24.2884	28.301	33.5071	38.6453	46.2919	60.639	82.1942
0.375766	0.759453	1.11829	1.50649	1.87419	2.22847	2.66191	3.27894	3.8493	4.45272	5.23202	6.22573	7.42674	8.83542	10.9228	13.0003	15.5896	18.4718	21.1291	24.2936	28.3275	33.5129	38.6493	46.293	60.6985	82.6267
0.377016	0.760635	1.11842	1.5081	1.87419	2.22847	2.66191	3.28109	3.84967	4.45695	5.23202	6.2306	7.43303	8.86279	10.9311	13.0178	15.5993	18.4718	21.1698	24.3182	28.43	33.5133	38.7001	46.3055	60.922	82.6707
0.377032	0.760931	1.12009	1.50864	1.87419	2.22847	2.66243	3.2833	3.85198	4.45695	5.23469	6.26452	7.44815	8.86805	10.9424	13.029	15.6284	18.4898	21.2169	24.3247	28.498	33.5493	38.7116	46.3186	60.9449	82.9424
0.377143	0.762193	1.12034	1.50881	1.87419	2.22847	2.664	3.2833	3.85198	4.47685	5.24364	6.2654	7.4725	8.87304	10.9502	13.043	15.6584	18.498	21.224	24.3347	28.5061	33.5783	38.7245	46.4614	61.0154	82.9427
0.378056	0.763626	1.1209	1.51236	1.87419	2.22847	2.66805	3.2833	3.85198	4.47898	5.24615	6.27418	7.48465	8.87304	10.958	13.0453	15.698	18.512	21.2326	24.3694	28.5111	33.5803	38.7588	46.472	61.2209	82.9741
0.378617	0.765158	1.12183	1.5153	1.87419	2.23741	2.67155	3.2833	3.85198	4.48422	5.25392	6.27418	7.48465	8.87304	10.9643	13.0801	15.698	18.5223	21.2326	24.37	28.5341	33.588	38.7705	46.4909	61.2231	83.0936
0.379841	0.765247	1.12259	1.51733	1.87419	2.23898	2.67417	3.2833	3.85198	4.49079	5.25805	6.27418	7.49678	8.87645	10.9643	13.0986	15.7385	18.5391	21.233	24.3745	28.5564	33.604	38.7963	46.6053	61.2242	83.2488
0.379877	0.765987	1.12468	1.51763	1.87893	2.23936	2.67619	3.28495	3.85198	4.49079	5.26088	6.27514	7.49678	8.89008	10.9864	13.1055	15.7519	18.5549	21.2351	24.403	28.596	33.6158	38.8417	46.6125	61.2327	83.432
0.380378	0.766353	1.12476	1.51905	1.87989	2.24268	2.68026	3.30169	3.85198	4.49079	5.26088	6.28004	7.49949	8.89008	10.9965	13.1262	15.7673	18.5617	21.2412	24.4088	28.5988	33.637	38.8644	46.6216	61.2785	83.5157
0.381134	0.766593	1.12555	1.52381	1.88426	2.24315	2.68044	3.30169	3.85256	4.49555	5.26664	6.28865	7.51292	8.89171	11.0056	13.1332	15.7846	18.5977	21.2455	24.4236	28.6018	33.6406	38.9614	46.6729	61.3174	83.6344
0.381156	0.76697	1.12711	1.53006	1.88796	2.24625	2.68156	3.30169	3.85401	4.49878	5.26664	6.28865	7.51292	8.92069	11.0194	13.1746	15.8191	18.5978	21.2626	24.4478	28.6046	33.6642	38.9676	46.7082	61.3519	83.7966
0.382733	0.768035	1.12731	1.53298	1.88907	2.25147	2.68251	3.30169	3.86904	4.5084	5.26664	6.29626	7.52902	8.95795	11.0202	13.1907	15.821	18.6545	21.2626	24.4959	28.6083	33.6775	38.9731	46.7126	61.4504	83.8737
0.38404	0.770371	1.12885	1.53331	1.8892	2.25223	2.68304	3.30169	3.87148	4.51192	5.27365	6.29706	7.52902	8.99149	11.0221	13.2068	15.8226	18.6853	21.2626	24.5132	28.6316	33.6861	39.0049	46.7198	61.4543	83.9593
0.384042	0.770699	1.1316	1.53443	1.88946	2.25268	2.68436	3.30169	3.88255	4.51768	5.2766	6.30308	7.52902	9.0154	11.0296	13.2068	15.8439	18.7177	21.2953	24.5262	28.6992	33.6861	39.0519	46.827	61.4924	83.9616
0.38468	0.771692	1.13368	1.53536	1.89097	2.25556	2.69139	3.30169	3.88808	4.51768	5.28386	6.30546	7.54031	9.0253	11.0852	13.2251	15.8439	18.7322	21.2953	24.5465	28.7053	33.707	39.0818	46.8904	61.5574	84.114
0.385858	0.772021	1.13654	1.5374	1.89253	2.25719	2.69168	3.30169	3.88946	4.51784	5.28386	6.3062	7.54405	9.0253	11.092	13.2457	15.8516	18.7682	21.2966	24.5515	28.7098	33.7606	39.0855	46.8913	61.5761	84.1215
0.385933	0.772527	1.13873	1.53941	1.89255	2.2583	2.69698	3.30169	3.89108	4.5187	5.2953	6.30788	7.54405	9.02866	11.0955	13.2816	15.8668	18.7823	21.3148	24.5515	28.7171	33.7771	39.1235	47.0013	61.6097	84.295
0.386252	0.772801	1.14198	1.53971	1.89496	2.26073	2.70037	3.30169	3.89108	4.52438	5.30102	6.3121	7.54441	9.02866	11.0988	13.2861	15.8827	18.799	21.3322	24.5626	28.7256	33.7875	39.1343	47.0046	61.6894	84.5858
[truncated: 12,962 more rows]
