# Supplementary material for: Long-term intravital imaging of the multicolor-coded tumor microenvironment during combination immunotherapy
Source: eLife. 2016 Nov 18;5:e14756. doi: 10.7554/eLife.14756 (PMC5173323; doi:10.7554/eLife.14756)
Supplement: Figure 3—source data 4. — DOI: http://dx.doi.org/10.7554/eLife.14756.019 [file elife-14756-fig3-data4.xls]

## Sheet: displacement(um)
0	0	0	0	0.0289241	0.0363262	0.021942	0.00975379	0.0610096	0.0888287	0.0372091	0.0405228	0.0692656	0.0116622	0.0676792	0.0271682	0.0334121	0.138929	0.073019	0.100584	0.225115	0.203436	0.258323	0.327648	0.302686	0.254296	0.146544	0.353421	0.584295	0.809277
0	0.0118239	0.0142756	0	0.032428	0.0399381	0.0303941	0.0592279	0.0737265	0.115363	0.147774	0.198685	0.176672	0.0955802	0.0810482	0.0544574	0.0341553	0.17943	0.291407	0.32238	0.245839	0.269378	0.28248	0.36377	0.340459	0.301005	0.508696	0.727099	0.940475	1.17633
0	0.025838	0.0206759	0.0165026	0.0504509	0.0500054	0.0811007	0.0751079	0.110498	0.141161	0.183688	0.217401	0.177082	0.0971022	0.114755	0.129622	0.112043	0.190394	0.308814	0.327149	0.298608	0.277938	0.325423	0.370709	0.391666	0.603839	0.789274	0.826303	0.957149	1.23047
0	0.0339752	0.0408807	0.0205243	0.0626908	0.0535465	0.104861	0.117135	0.115507	0.141283	0.192653	0.224565	0.194884	0.112021	0.115935	0.144157	0.124743	0.24262	0.365794	0.437782	0.372083	0.318953	0.359827	0.395962	0.513826	0.740838	0.819499	0.939675	1.15713	2.00498
0	0.0366325	0.0526844	0.0295217	0.0690449	0.0809907	0.115195	0.136472	0.124952	0.153026	0.219831	0.232214	0.195245	0.198312	0.160607	0.147253	0.178051	0.245276	0.390263	0.446935	0.403818	0.419649	0.362545	0.40322	0.553563	0.748707	0.836705	1.02881	1.32526	2.12045
0	0.0433401	0.0526895	0.0445415	0.0709314	0.098236	0.129647	0.144862	0.134464	0.16782	0.220148	0.233031	0.209153	0.204187	0.167043	0.151251	0.218486	0.293052	0.397303	0.452288	0.424071	0.42686	0.38958	0.434196	0.588478	0.788236	0.932427	1.24226	1.85063	2.39248
0	0.0515675	0.0557615	0.0558753	0.0710819	0.110316	0.130151	0.146372	0.141663	0.206878	0.232313	0.253657	0.243951	0.207012	0.167474	0.173164	0.289909	0.348029	0.445666	0.480675	0.492188	0.450024	0.419732	0.462388	0.642699	0.883778	1.03679	1.39212	1.86546	2.51429
0	0.0568759	0.0618459	0.0564519	0.0783846	0.112762	0.138256	0.152152	0.150496	0.212487	0.23729	0.259339	0.261148	0.242075	0.197089	0.194282	0.332101	0.363396	0.481725	0.534669	0.524628	0.462863	0.469901	0.778217	0.874882	0.960506	1.2458	1.73	2.10263	2.60786
0	0.058149	0.0671531	0.0600464	0.0874232	0.117027	0.14071	0.162003	0.169616	0.228944	0.247838	0.284283	0.269065	0.274058	0.203895	0.299533	0.368749	0.45209	0.519505	0.550282	0.562413	0.565025	0.835245	0.849525	0.892597	1.01925	1.39212	1.80585	2.18071	2.91763
0	0.0582496	0.0677402	0.0630416	0.0897043	0.120176	0.150686	0.162395	0.186768	0.229366	0.258079	0.313473	0.282703	0.287915	0.271516	0.333378	0.403449	0.45353	0.519789	0.615394	0.602033	0.696058	0.841089	0.881756	0.91974	1.04487	1.67406	1.99459	2.21475	3.19459
0	0.0584583	0.0715219	0.0665027	0.0929243	0.124597	0.159275	0.162919	0.19762	0.237519	0.284636	0.339819	0.290777	0.314814	0.307177	0.378726	0.445728	0.496439	0.520844	0.631144	0.613161	0.845928	0.858818	0.908304	0.941187	1.20912	1.77443	2.06524	2.4008	3.54769
0	0.0594363	0.0792649	0.0699572	0.118291	0.125426	0.166306	0.185543	0.198827	0.246094	0.302086	0.340059	0.34076	0.340454	0.325796	0.378862	0.456555	0.517687	0.521023	0.659911	0.678477	0.857451	0.988306	0.95345	1.00263	1.23047	1.94646	2.21372	2.42504	4.24375
0	0.0600176	0.0856111	0.0703968	0.118376	0.130011	0.181203	0.21024	0.259723	0.248674	0.33417	0.352089	0.351329	0.352384	0.334705	0.417762	0.545803	0.547303	0.540986	0.665033	0.737927	0.922905	0.994849	0.995604	1.10717	1.30427	1.97713	2.26367	2.46455	4.46887
0	0.0606601	0.0870939	0.0710819	0.123259	0.134377	0.181263	0.210745	0.274727	0.293279	0.347401	0.354164	0.356862	0.378588	0.412947	0.421319	0.550282	0.570914	0.545667	0.673046	0.77784	0.958663	1.00654	1.00206	1.15936	1.51432	1.99404	2.31622	2.68022	4.75283
0	0.0611135	0.0921768	0.0717449	0.129361	0.134584	0.18381	0.221771	0.277797	0.300465	0.355783	0.355712	0.357619	0.400408	0.45572	0.481566	0.55822	0.573818	0.567022	0.67611	0.823824	0.968788	1.13171	1.00943	1.22664	1.87852	2.0983	2.33595	2.75707	5.00869
0.00490638	0.0612064	0.0928873	0.0739248	0.13042	0.145453	0.191986	0.229347	0.283345	0.303174	0.359138	0.356357	0.365777	0.409728	0.473712	0.497828	0.574983	0.579353	0.604409	0.690645	0.846322	1.04325	1.13716	1.06445	1.25484	1.91249	2.11102	2.3962	2.79416	5.07335
0.014765	0.0627423	0.0969908	0.0862266	0.135718	0.160017	0.194837	0.240745	0.297873	0.311662	0.367136	0.3594	0.367082	0.414363	0.475262	0.522927	0.576876	0.634811	0.638007	0.708068	0.887859	1.05442	1.14329	1.21361	1.48598	1.91583	2.11393	2.46458	2.79801	5.16774
0.0155782	0.0667837	0.0996594	0.0862799	0.135932	0.165655	0.1954	0.246094	0.305127	0.313203	0.376616	0.361181	0.378162	0.424857	0.491665	0.527327	0.578449	0.678777	0.669931	0.727683	0.988932	1.05718	1.19505	1.25962	1.72874	1.92498	2.15252	2.47321	2.88729	5.23432
0.0213929	0.0710195	0.102733	0.0914086	0.143691	0.170501	0.196334	0.246094	0.321409	0.321355	0.379228	0.36746	0.379047	0.439766	0.507744	0.557873	0.598421	0.6875	0.677849	0.781329	1.04892	1.13809	1.21217	1.26357	1.77532	1.94031	2.17631	2.48765	2.95312	6.62628
0.0214618	0.0712055	0.105385	0.0924354	0.15679	0.179672	0.201116	0.246943	0.328241	0.344117	0.391391	0.37112	0.388477	0.441503	0.52451	0.563581	0.602786	0.687586	0.705374	0.859132	1.10479	1.19071	1.26001	1.35367	1.78496	2.0254	2.17853	2.53643	2.98606	8.07926
0.023707	0.0719837	0.106638	0.104011	0.156802	0.186668	0.203265	0.252604	0.329844	0.350333	0.392698	0.38669	0.391171	0.446612	0.5336	0.567905	0.614089	0.737276	0.738281	0.926001	1.12073	1.20218	1.36013	1.50614	1.83642	2.03036	2.19308	2.56929	2.98751	8.70073
0.0268868	0.0742034	0.107497	0.112748	0.158403	0.187991	0.206292	0.262815	0.339134	0.368223	0.408154	0.392899	0.391243	0.455326	0.536333	0.596423	0.635465	0.754511	0.748576	0.969852	1.12504	1.21483	1.41122	1.57436	1.96128	2.04345	2.27656	2.64134	3.318	8.79456
0.0294184	0.0744828	0.10845	0.113199	0.162372	0.188172	0.233116	0.265169	0.348559	0.379649	0.41427	0.396335	0.411022	0.473019	0.557298	0.614089	0.643571	0.756608	0.778217	0.977764	1.13104	1.25602	1.41864	1.67011	1.96729	2.0656	2.32281	2.65146	3.44104	10.2949
0.0304505	0.0805465	0.125667	0.113587	0.165334	0.200304	0.238292	0.267155	0.355959	0.387011	0.415773	0.397305	0.417277	0.50666	0.565863	0.650017	0.648937	0.758377	0.872023	1.00293	1.1546	1.27465	1.42622	1.67887	1.99788	2.09752	2.33507	2.66008	3.75102	11.1826
0.030718	0.0829331	0.12687	0.118367	0.169468	0.205437	0.239277	0.272994	0.359191	0.387701	0.425633	0.398277	0.424601	0.5389	0.573312	0.650531	0.660151	0.759836	0.872024	1.01174	1.18394	1.27485	1.46074	1.68021	2.0012	2.1509	2.3394	2.75251	3.86022	12.3661
0.0313936	0.0832486	0.127021	0.125736	0.170792	0.212779	0.248047	0.273236	0.363615	0.38891	0.429068	0.404154	0.464094	0.545812	0.576506	0.653147	0.678777	0.765873	0.890092	1.02531	1.21635	1.28654	1.49693	1.80204	2.01122	2.18309	2.40823	2.77507	3.8894	16.236
0.031998	0.0841253	0.130681	0.127547	0.171815	0.222847	0.248047	0.27646	0.392733	0.393867	0.439717	0.412498	0.467173	0.553773	0.615596	0.671307	0.738281	0.791766	0.892247	1.03099	1.23047	1.33483	1.558	1.86141	2.01715	2.18653	2.44672	2.89421	4.02419	16.5228
0.033416	0.0848999	0.133612	0.130567	0.172779	0.2234	0.248901	0.279214	0.394248	0.396431	0.441314	0.432832	0.480305	0.613186	0.66593	0.679968	0.756579	0.808976	0.899893	1.03509	1.2404	1.36044	1.57345	1.86803	2.04173	2.19667	2.46109	2.90058	4.10375	17.9669
0.0390581	0.0854954	0.134738	0.132915	0.177882	0.227201	0.259943	0.283884	0.39429	0.418178	0.445463	0.457929	0.481794	0.636168	0.672834	0.697174	0.761689	0.845676	0.904951	1.04444	1.27233	1.36294	1.57766	1.87746	2.08113	2.28358	2.49456	2.91399	4.14012	19.0151
0.039336	0.0856773	0.139815	0.13785	0.182665	0.231819	0.261713	0.289961	0.396881	0.428166	0.446564	0.458014	0.537844	0.637376	0.682752	0.739633	0.780683	0.854483	0.911767	1.10056	1.28028	1.40925	1.59821	1.89839	2.09552	2.30879	2.52125	2.99835	4.20982	21.013
0.0393887	0.0870254	0.14085	0.14768	0.185809	0.235734	0.270704	0.295615	0.39818	0.436951	0.449813	0.460355	0.550282	0.649862	0.739633	0.748577	0.788236	0.892071	0.992019	1.13332	1.31677	1.45588	1.67069	1.92366	2.10092	2.31071	2.57894	3.12071	5.11795	21.336
0.0398862	0.0894941	0.1456	0.147853	0.186019	0.256248	0.289537	0.297192	0.398231	0.446553	0.451891	0.481622	0.551817	0.666908	0.742128	0.768146	0.789796	0.893843	1.02678	1.15833	1.35123	1.46903	1.74015	1.94631	2.12408	2.35807	2.58651	3.16886	5.13859	23.5081
0.0413742	0.0937999	0.147889	0.15454	0.199086	0.263774	0.290901	0.302815	0.409901	0.448164	0.464105	0.492188	0.581631	0.68393	0.749111	0.778217	0.8093	0.904324	1.04115	1.1953	1.3782	1.50926	1.7578	1.96098	2.12466	2.39275	2.59785	3.24933	5.22044	23.7643
0.0431602	0.100804	0.156044	0.154796	0.201341	0.264725	0.293966	0.31204	0.416565	0.450992	0.467812	0.504396	0.586615	0.702032	0.783622	0.779879	0.861134	0.92525	1.04161	1.20698	1.40918	1.57227	1.76557	1.96332	2.13018	2.39606	2.62828	3.38538	5.41384	24.5671
0.0461854	0.102141	0.159882	0.155029	0.207389	0.265633	0.294289	0.323382	0.416992	0.45335	0.473495	0.506477	0.596686	0.714306	0.793704	0.783581	0.871573	0.951677	1.0463	1.20947	1.41757	1.61234	1.79799	1.99692	2.14395	2.42438	2.72789	3.41765	5.50226	26.0171
0.0469839	0.102255	0.160446	0.161798	0.208847	0.266075	0.306538	0.32958	0.417714	0.462087	0.476005	0.512184	0.636583	0.717814	0.796847	0.784504	0.917227	0.974374	1.05039	1.2377	1.42133	1.62213	1.81515	2.03259	2.19939	2.43009	2.94953	3.48435	6.57412	26.6756
0.0499142	0.103455	0.162804	0.173436	0.210142	0.271242	0.309509	0.341318	0.421609	0.468916	0.489285	0.542844	0.641544	0.721486	0.821132	0.792478	0.92792	0.984375	1.07562	1.24345	1.43551	1.64174	1.84221	2.04017	2.22107	2.43767	2.97414	3.56126	6.988	26.8447
0.050691	0.104686	0.163665	0.178505	0.21381	0.274342	0.337139	0.344429	0.42946	0.469101	0.495977	0.550282	0.678685	0.725431	0.828773	0.81037	0.955437	0.990537	1.09425	1.25149	1.43902	1.64672	1.85229	2.06318	2.27375	2.44622	2.99016	3.56246	7.13542	27.9034
0.0508752	0.10502	0.168702	0.179015	0.214066	0.276643	0.339605	0.360964	0.430393	0.478091	0.497347	0.565387	0.714274	0.738518	0.844457	0.871247	0.956161	0.992019	1.09974	1.25484	1.45595	1.64686	1.85745	2.08373	2.27632	2.45595	2.99386	3.60133	7.72013	28.7256
0.0510556	0.106665	0.170741	0.184491	0.220349	0.280625	0.342204	0.369663	0.437561	0.483418	0.501395	0.569432	0.715926	0.743387	0.862613	0.879338	0.982097	1.03663	1.12342	1.25576	1.45973	1.67883	1.91201	2.09752	2.28601	2.4569	3.08841	3.63036	7.90676	28.8045
0.0511825	0.112562	0.171511	0.194367	0.230273	0.28515	0.344485	0.370587	0.444334	0.484122	0.516686	0.577173	0.71809	0.763899	0.872659	0.886281	1.00014	1.05887	1.13272	1.2753	1.47735	1.69748	1.92366	2.10088	2.28691	2.49204	3.12722	3.69141	8.3527	29.0331
0.0526187	0.114025	0.172621	0.194391	0.230734	0.285863	0.348029	0.378584	0.452483	0.495865	0.521767	0.577783	0.71828	0.782216	0.884751	0.887304	1.0198	1.07694	1.15671	1.28967	1.48476	1.71259	1.93083	2.15248	2.32462	2.56061	3.15151	3.86786	8.84696	29.9063
0.0530765	0.114181	0.173588	0.195156	0.232422	0.29217	0.348029	0.387605	0.45386	0.498647	0.531835	0.582454	0.734682	0.819621	0.898168	0.889005	1.0472	1.08247	1.16087	1.29116	1.48593	1.72558	1.95313	2.18986	2.34825	2.60663	3.22649	3.93622	9.22441	30.0396
0.0533206	0.115038	0.176978	0.203153	0.234168	0.296955	0.348029	0.396767	0.456585	0.50349	0.539112	0.612347	0.735255	0.82304	0.899901	0.90462	1.0587	1.13002	1.16668	1.30345	1.49842	1.74657	1.96192	2.20905	2.35224	2.68814	3.2874	4.02815	10.5319	30.5535
0.0541982	0.11969	0.177133	0.20523	0.23797	0.299912	0.362391	0.39795	0.461183	0.527136	0.542465	0.615257	0.738281	0.861782	0.900273	0.912241	1.095	1.13183	1.16764	1.38562	1.52619	1.78098	1.97558	2.20939	2.3786	2.73204	3.34648	4.25154	10.5849	30.6233
0.0571366	0.120993	0.17754	0.208772	0.238336	0.30719	0.369759	0.400761	0.463558	0.529434	0.548305	0.618901	0.740194	0.864421	0.904216	0.989094	1.13116	1.13596	1.2754	1.40905	1.56893	1.79164	1.97562	2.25008	2.39731	2.73563	3.41416	5.26088	10.6184	32.5784
0.0578429	0.124685	0.178373	0.210106	0.246094	0.317461	0.37369	0.407774	0.481652	0.530263	0.55044	0.621311	0.743385	0.871202	0.904829	0.999233	1.13749	1.15688	1.28059	1.41485	1.58814	1.8237	2.00967	2.25052	2.42071	2.80273	3.42285	5.30102	11.0196	33.5671
0.0580074	0.125939	0.184521	0.214377	0.246094	0.321937	0.374633	0.41024	0.485252	0.538206	0.55276	0.63202	0.766157	0.877244	0.923349	1.02172	1.17967	1.16351	1.31292	1.43242	1.59444	1.83094	2.01432	2.2661	2.42333	2.80765	3.42833	5.40974	11.1414	34.0557
0.0586915	0.128412	0.184575	0.217984	0.25329	0.322873	0.374858	0.410952	0.486639	0.539487	0.55465	0.634159	0.778217	0.886902	0.925548	1.02349	1.18455	1.17021	1.31488	1.5062	1.62656	1.86604	2.06203	2.27224	2.44298	2.9013	3.43429	5.58328	12.4268	35.5816
0.0600727	0.130265	0.185336	0.219635	0.253325	0.336762	0.382873	0.412679	0.490179	0.560744	0.560561	0.665302	0.791978	0.887304	0.939364	1.03057	1.20066	1.1803	1.3214	1.5072	1.65345	1.86789	2.06789	2.28125	2.45668	2.90927	3.44917	5.66553	12.5646	35.6696
0.0601975	0.131547	0.188816	0.220408	0.259715	0.338539	0.384468	0.414244	0.496094	0.567907	0.564077	0.691469	0.814696	0.923349	0.984922	1.05059	1.20089	1.24923	1.32228	1.51462	1.66499	1.86948	2.06877	2.30127	2.48462	2.94729	3.51408	5.67513	13.0638	36.7843
0.0601994	0.132284	0.19033	0.223096	0.260303	0.344121	0.393167	0.425618	0.498246	0.577054	0.565657	0.692263	0.821526	0.929373	0.99957	1.09725	1.20633	1.26209	1.32526	1.52058	1.68932	1.90021	2.07173	2.31452	2.501	2.99386	3.6282	5.7081	13.6776	37.7176
0.0614477	0.134224	0.197156	0.225079	0.263741	0.34788	0.395998	0.425711	0.498632	0.582317	0.576051	0.715268	0.831643	0.93265	1.01081	1.10229	1.20969	1.26809	1.36298	1.56562	1.71253	1.92027	2.08841	2.31517	2.55921	3.11754	3.65002	5.87281	16.168	37.8102
0.0629879	0.134873	0.199357	0.229177	0.268696	0.348029	0.397239	0.43956	0.501335	0.582415	0.609618	0.740553	0.835816	0.933204	1.01427	1.10536	1.21062	1.2722	1.37701	1.56577	1.71804	1.92863	2.12278	2.33391	2.57103	3.13655	3.83368	6.93006	16.1742	38.0936
0.0632398	0.135253	0.199516	0.229633	0.272077	0.348029	0.404658	0.44091	0.511132	0.583582	0.622763	0.7439	0.836223	0.936333	1.03066	1.11852	1.21099	1.28155	1.48626	1.57832	1.72164	1.93477	2.14028	2.33514	2.59993	3.17969	3.84409	7.21357	16.272	38.1644
0.0643801	0.138216	0.206449	0.231256	0.273393	0.349754	0.41039	0.45061	0.513151	0.596593	0.62597	0.748418	0.836339	0.94221	1.04409	1.12275	1.2249	1.28208	1.5072	1.61257	1.7495	1.93898	2.16622	2.3397	2.66799	3.20803	4.07358	7.44186	17.9786	38.8524
0.064417	0.140082	0.208675	0.23367	0.278507	0.350142	0.411822	0.451897	0.513545	0.597401	0.628431	0.776541	0.857706	0.950505	1.05073	1.1338	1.24674	1.30244	1.5449	1.61821	1.77939	1.94341	2.17286	2.34366	2.67201	3.25482	4.18359	7.54733	18.2504	38.9163
0.0646333	0.141772	0.208772	0.238168	0.282792	0.350791	0.4125	0.452943	0.515599	0.603014	0.632996	0.778465	0.859067	0.955275	1.05966	1.13641	1.25484	1.32526	1.55124	1.62016	1.79098	1.94854	2.17716	2.3554	2.75619	3.26567	4.39076	7.57552	18.2793	39.5711
0.0649307	0.142745	0.209696	0.23839	0.284518	0.350791	0.412664	0.455132	0.515978	0.616933	0.644115	0.779618	0.88581	0.974193	1.07911	1.16473	1.25792	1.32599	1.57898	1.64906	1.79533	1.94862	2.18314	2.37979	2.76496	3.28798	4.55703	7.66455	18.7486	40.3299
0.0650192	0.143123	0.210463	0.239147	0.288995	0.352281	0.412788	0.472014	0.527815	0.620827	0.69217	0.781439	0.889898	0.996178	1.08826	1.21577	1.26829	1.36549	1.58138	1.65055	1.79831	1.94904	2.19361	2.41624	2.80354	3.29669	4.88709	7.77048	20.8193	40.796
0.0665377	0.144032	0.215077	0.24046	0.293126	0.352371	0.416215	0.475653	0.531449	0.623411	0.702043	0.783805	0.891213	0.998565	1.10056	1.23047	1.27996	1.39028	1.58401	1.65519	1.81217	1.95538	2.20332	2.44298	2.85237	3.32422	5.30102	7.87839	20.8908	42.0522
0.0670014	0.146987	0.215685	0.242105	0.296955	0.352855	0.421384	0.482537	0.534883	0.634858	0.705494	0.785473	0.902175	0.999011	1.10056	1.24936	1.32276	1.39241	1.59506	1.67723	1.82007	1.97207	2.21671	2.45084	2.86598	3.58091	5.37477	8.75436	21.1976	43.5575
0.069001	0.14978	0.21585	0.248047	0.302969	0.356392	0.426493	0.492188	0.535078	0.645757	0.712016	0.792634	0.90809	0.999808	1.10616	1.25125	1.32402	1.40399	1.59889	1.69006	1.82401	1.99495	2.22332	2.48988	2.89103	3.64117	5.5434	8.87645	22.3016	44.8906
0.0691415	0.150934	0.216795	0.248047	0.308828	0.35726	0.426606	0.492835	0.540144	0.64679	0.713432	0.794328	0.911232	1.02614	1.11723	1.25484	1.33717	1.40451	1.59949	1.6902	1.83849	2.00114	2.23957	2.50538	2.93977	3.74384	5.61016	8.90593	22.4178	46.3186
0.0692185	0.151327	0.218912	0.251024	0.316061	0.360074	0.426844	0.498998	0.541611	0.648285	0.720185	0.795627	0.912817	1.02908	1.12347	1.25913	1.33815	1.41089	1.61933	1.69169	1.84778	2.00439	2.26998	2.53373	2.96336	3.79391	5.73573	9.5565	22.892	47.4039
0.0692722	0.151466	0.218977	0.252597	0.321342	0.369165	0.430753	0.501958	0.546472	0.656128	0.723658	0.797238	0.913852	1.04395	1.13254	1.26059	1.35004	1.43666	1.63332	1.69409	1.85463	2.02028	2.27479	2.56201	2.9639	3.80126	5.74512	9.74482	23.0239	50.747
0.0703903	0.152315	0.220357	0.25405	0.322217	0.369471	0.434204	0.511763	0.546912	0.662996	0.724963	0.805181	0.916576	1.0533	1.13963	1.26336	1.35777	1.43759	1.63397	1.69754	1.86214	2.03945	2.28125	2.63183	2.96922	3.80269	5.74512	9.96835	23.205	51.9763
0.0712436	0.152451	0.222319	0.25481	0.324695	0.373151	0.434488	0.515769	0.565973	0.664478	0.731516	0.805652	0.91931	1.05418	1.14495	1.27997	1.37543	1.46027	1.63431	1.71671	1.88984	2.05514	2.31195	2.68157	3.06272	3.94518	5.86388	10.0231	23.3063	52.2915
0.0713799	0.152748	0.227995	0.258501	0.325939	0.374292	0.435013	0.518153	0.56637	0.670373	0.73852	0.816065	0.920603	1.0558	1.14563	1.28666	1.39265	1.49693	1.63548	1.72763	1.89558	2.06789	2.32996	2.73147	3.14884	4.02537	5.91982	10.4584	24.0137	54.4752
0.0715614	0.153612	0.228558	0.263558	0.331314	0.374339	0.450615	0.534199	0.582033	0.67264	0.749842	0.820384	0.926573	1.06372	1.17037	1.29193	1.39511	1.51076	1.63649	1.73688	1.90754	2.07038	2.35318	2.74686	3.23824	4.07023	5.95221	10.6662	24.1832	54.9215
0.0717384	0.153802	0.230065	0.267853	0.337767	0.375797	0.450957	0.539339	0.582577	0.674629	0.761074	0.835829	0.938754	1.06686	1.18265	1.29377	1.40546	1.51617	1.63812	1.74015	1.91096	2.08503	2.37169	2.75193	3.24516	4.20951	5.9573	10.6789	25.5462	55.0157
0.0726631	0.154651	0.230571	0.267869	0.342388	0.376467	0.452445	0.539352	0.588285	0.677631	0.763204	0.840208	0.990099	1.06759	1.18588	1.30357	1.41051	1.5163	1.64051	1.74835	1.94854	2.09908	2.38539	2.76935	3.2869	4.39656	5.98264	11.3995	25.5876	55.6453
0.0733489	0.155357	0.232021	0.269914	0.342648	0.386132	0.456043	0.545364	0.589049	0.681419	0.77581	0.84101	0.994804	1.07304	1.18796	1.30709	1.41517	1.52819	1.64079	1.76061	1.95376	2.10394	2.44326	2.77443	3.292	4.39661	6.33892	11.8375	25.7636	58.4958
0.0737048	0.155548	0.232352	0.271547	0.344933	0.387775	0.459289	0.547225	0.61295	0.687652	0.777833	0.859315	0.99483	1.07908	1.1935	1.317	1.41694	1.53629	1.64735	1.76065	1.95886	2.10764	2.45042	2.7807	3.47266	4.68225	6.64378	12.074	25.9147	58.7319
0.0737048	0.156613	0.232445	0.272552	0.346477	0.396823	0.461624	0.548019	0.626681	0.687667	0.781395	0.86223	0.996372	1.09287	1.19393	1.31761	1.42805	1.54269	1.65647	1.79113	1.97099	2.16501	2.46617	2.79724	3.47301	4.77088	6.7888	12.4954	25.9241	59.3528
0.074247	0.157136	0.23701	0.278974	0.346481	0.397131	0.463734	0.55465	0.628577	0.689399	0.781512	0.870277	1.00563	1.09398	1.1977	1.32462	1.43385	1.54423	1.67175	1.81776	1.97234	2.18443	2.47268	2.80355	3.47395	4.98302	7.1675	12.7992	26.5234	60.4059
0.074368	0.162223	0.23761	0.285565	0.350791	0.401798	0.464365	0.55465	0.632146	0.694294	0.78357	0.88576	1.00621	1.11355	1.20424	1.32491	1.44057	1.54586	1.67345	1.81835	1.97519	2.18664	2.47886	2.83824	3.52079	5.02798	7.27037	14.168	26.7202	60.4935
0.075198	0.162236	0.239641	0.288814	0.352531	0.40297	0.465918	0.555014	0.633906	0.695087	0.790544	0.887737	1.00636	1.12442	1.20628	1.32522	1.44389	1.57952	1.6756	1.82007	1.98485	2.21124	2.52959	2.94539	3.52452	5.28901	7.30477	14.3496	26.9471	64.3854
0.0755523	0.163736	0.240513	0.291386	0.352946	0.40389	0.468063	0.559048	0.639836	0.699299	0.793227	0.890835	1.01453	1.12466	1.22325	1.32526	1.45856	1.58795	1.67902	1.84497	1.98853	2.23317	2.54187	2.97304	3.74748	5.34623	7.41096	14.8066	27.1587	69.2679
0.0755988	0.164083	0.242191	0.295545	0.353597	0.407958	0.468229	0.560214	0.646042	0.703691	0.812464	0.891556	1.02245	1.12523	1.22919	1.34401	1.46444	1.58917	1.68718	1.84705	2.01574	2.26887	2.55487	2.98688	3.93797	5.37477	7.61331	15.7827	27.4965	71.6713
0.0766479	0.165635	0.244058	0.297333	0.35565	0.414293	0.478614	0.565358	0.647827	0.713635	0.815211	0.894793	1.0254	1.13696	1.23047	1.3509	1.46687	1.59246	1.68828	1.8545	2.01819	2.27685	2.57638	3.03501	3.97334	5.43639	8.18054	15.8297	27.5085	72.0999
0.0766722	0.16656	0.244311	0.298626	0.357631	0.417079	0.481726	0.57047	0.649728	0.724908	0.817229	0.918726	1.02616	1.13701	1.23148	1.3672	1.46866	1.59569	1.70812	1.85497	2.04073	2.29893	2.59867	3.0615	4.02653	5.57676	8.29116	15.8558	28.6901	72.3783
0.0777391	0.167309	0.244482	0.299344	0.358658	0.420664	0.487653	0.57101	0.652718	0.726551	0.822459	0.923363	1.02701	1.14792	1.23486	1.36844	1.47649	1.59992	1.72763	1.86429	2.0553	2.30465	2.65299	3.07894	4.25315	5.69348	8.40241	16.127	28.9142	73.33
0.0787076	0.167682	0.245048	0.30113	0.360236	0.42117	0.491065	0.574861	0.658877	0.727181	0.82456	0.929443	1.0283	1.14955	1.23977	1.38075	1.47656	1.60692	1.72903	1.86589	2.05586	2.32551	2.66577	3.12471	4.26574	5.76247	8.80481	16.588	29.7472	76.7442
0.0788427	0.167819	0.245064	0.301658	0.367793	0.428042	0.492072	0.577375	0.661429	0.727331	0.826394	0.931065	1.03112	1.1552	1.24506	1.38126	1.47957	1.6182	1.7322	1.86985	2.08946	2.32952	2.66845	3.13226	4.29814	5.84958	9.04434	17.5998	29.9716	77.0788
0.0809216	0.168515	0.245602	0.303063	0.367912	0.430176	0.492188	0.578344	0.661794	0.741397	0.832901	0.938366	1.0336	1.172	1.25502	1.38739	1.48139	1.61864	1.7336	1.87556	2.09215	2.34708	2.70059	3.1826	4.37044	5.9165	9.32942	17.9874	30.1034	80.2167
0.082836	0.168675	0.246094	0.304013	0.369755	0.430405	0.493989	0.588606	0.666235	0.748918	0.835559	0.943527	1.03448	1.17733	1.27184	1.39373	1.48354	1.61964	1.73896	1.88146	2.10137	2.36092	2.71819	3.20867	4.37742	5.98519	9.39679	18.1967	30.4394	81.8783
0.0828912	0.168917	0.248047	0.305025	0.371705	0.432074	0.50202	0.588816	0.670749	0.75081	0.840082	0.950852	1.03983	1.17844	1.28173	1.39426	1.49052	1.62153	1.74469	1.88197	2.12744	2.37342	2.76967	3.21032	4.43652	5.98772	9.48316	18.4278	30.441	83.0216
0.0832405	0.168946	0.249882	0.305048	0.371752	0.432933	0.50309	0.59106	0.68124	0.75298	0.843968	0.953769	1.04543	1.18344	1.28977	1.39427	1.49405	1.63182	1.75353	1.88352	2.15284	2.4326	2.80207	3.38514	4.46532	6.00933	9.87163	18.4691	30.7826	84.8577
0.0834094	0.170896	0.249913	0.309195	0.373214	0.436453	0.505863	0.596142	0.68503	0.760522	0.844172	0.955418	1.05195	1.18501	1.29696	1.41568	1.49836	1.63199	1.76841	1.8863	2.16359	2.43684	2.88095	3.45382	4.52438	6.1126	10.0133	18.6025	30.8355	87.7588
0.0834568	0.172103	0.249921	0.309824	0.374331	0.439216	0.509484	0.596735	0.691974	0.761297	0.853174	0.958896	1.0533	1.19299	1.29716	1.42493	1.50277	1.63313	1.76928	1.90605	2.1894	2.44321	2.90918	3.51551	4.68225	6.11893	10.1075	19.4908	31.5763	87.7869
0.0838231	0.172417	0.25285	0.310657	0.375359	0.444281	0.510383	0.598261	0.700324	0.774764	0.854499	0.959965	1.05649	1.19659	1.32481	1.43189	1.50506	1.63384	1.78692	1.91413	2.22488	2.5213	2.91547	3.64481	4.70109	6.2306	10.252	20.3292	32.0144	87.9161
0.0845346	0.172456	0.255783	0.310803	0.376669	0.44805	0.51315	0.604632	0.702482	0.77629	0.858407	0.961367	1.07206	1.19812	1.32645	1.4385	1.50953	1.63431	1.7901	1.9208	2.22665	2.54567	2.93598	3.70373	4.73927	6.56062	10.2683	20.3573	32.164	89.2493
0.0846404	0.17452	0.256904	0.324957	0.376749	0.448648	0.5142	0.605829	0.702909	0.778217	0.873761	0.962591	1.07897	1.21594	1.33127	1.44855	1.51762	1.64265	1.80148	1.95148	2.23235	2.57715	2.94613	3.72929	4.90784	6.90724	10.4804	20.3751	33.9083	89.7568
0.0855616	0.17547	0.257525	0.325625	0.379918	0.448659	0.518453	0.605956	0.706098	0.778398	0.881827	0.969252	1.09021	1.23047	1.33221	1.44889	1.52192	1.64579	1.80468	1.9522	2.23638	2.58969	2.96885	3.74227	5.07335	6.99675	11.1722	20.3797	34.0866	90.8424
0.0862498	0.177535	0.261947	0.32613	0.382736	0.451754	0.524271	0.611004	0.71915	0.781651	0.882502	0.97161	1.09047	1.23047	1.34628	1.45212	1.53185	1.65521	1.82334	1.95745	2.23901	2.59668	2.99419	3.94443	5.0895	7.08475	11.5707	20.4273	34.3895	91.9235
0.0865826	0.177738	0.26258	0.326712	0.383016	0.456171	0.526208	0.612898	0.720384	0.78532	0.882546	0.979359	1.0957	1.23047	1.3565	1.45448	1.53412	1.65929	1.8336	1.95762	2.25186	2.62224	3.03434	4.0004	5.19559	7.1349	11.7155	20.7623	34.4751	93.6612
0.0883466	0.180702	0.264439	0.327583	0.383068	0.456282	0.536179	0.61957	0.72162	0.792366	0.885736	0.981008	1.10141	1.23131	1.36615	1.47691	1.53676	1.66126	1.83608	1.98823	2.25998	2.62988	3.06972	4.15635	5.38285	7.25379	12.0536	20.7663	34.9488	101.661
0.0886581	0.181248	0.264517	0.328522	0.383375	0.478856	0.538745	0.620433	0.724741	0.798482	0.887304	0.981043	1.1027	1.24112	1.37258	1.47698	1.53686	1.66688	1.83765	1.99444	2.26012	2.65313	3.10723	4.19102	5.43639	7.30861	12.0611	20.9916	35.4131	104.698
0.0886831	0.181327	0.264844	0.330286	0.384606	0.479001	0.541394	0.628409	0.72723	0.800047	0.887304	0.983295	1.11233	1.25435	1.38362	1.48065	1.54046	1.69665	1.84136	2.00984	2.28177	2.65414	3.13791	4.20525	5.44668	7.4485	12.1111	21.3316	35.4253	105.296
0.0887439	0.181821	0.267901	0.331145	0.385721	0.481641	0.542096	0.629439	0.728066	0.805196	0.888899	0.988721	1.11791	1.25905	1.38639	1.4924	1.5679	1.69826	1.84219	2.03828	2.29175	2.709	3.15686	4.33437	5.46084	7.78217	12.3704	21.941	35.4869	107.371
0.0902477	0.184415	0.267996	0.331496	0.38622	0.483569	0.546534	0.630623	0.73316	0.805457	0.892243	1.00086	1.12313	1.25908	1.38686	1.49587	1.57679	1.71101	1.84265	2.04581	2.3431	2.72787	3.28092	4.38889	5.46417	7.93628	12.4527	22.1348	35.7201	110.125
0.0922161	0.184418	0.268652	0.331861	0.387813	0.484814	0.552906	0.632177	0.733363	0.808062	0.894439	1.00416	1.13128	1.2707	1.40285	1.49968	1.57845	1.72285	1.85184	2.04924	2.40108	2.78052	3.42751	4.43273	5.46417	8.0315	12.7019	22.1706	35.7329	110.192
0.0922575	0.185494	0.269737	0.33805	0.389925	0.487315	0.554019	0.635158	0.739288	0.810497	0.895423	1.02773	1.13643	1.27562	1.40697	1.50012	1.58332	1.72449	1.87068	2.05474	2.4011	2.86943	3.54004	4.53446	5.63875	8.59384	13.8739	22.6669	35.8492	112.09
0.0922685	0.186019	0.270898	0.339151	0.389992	0.48735	0.555122	0.639944	0.741501	0.815395	0.903158	1.02873	1.15202	1.28269	1.40802	1.51245	1.58647	1.73161	1.87202	2.0553	2.41577	2.92228	3.55668	4.53774	5.84958	8.70769	14.0618	23.1126	36.7211	112.243
0.0939513	0.186446	0.272812	0.341234	0.392924	0.490608	0.560342	0.641873	0.74621	0.819484	0.922231	1.0303	1.15458	1.28606	1.41767	1.53093	1.5903	1.74728	1.88111	2.06867	2.41857	2.93297	3.65845	4.54164	5.9419	9.03685	14.4023	23.1136	36.8835	116.992
0.0943985	0.186764	0.273934	0.342948	0.393418	0.493385	0.560773	0.645808	0.748221	0.82123	0.928994	1.03361	1.18695	1.30169	1.43282	1.53787	1.60572	1.7542	1.90188	2.07307	2.43362	2.95165	3.65845	4.56269	6.03074	9.18247	14.4771	23.2659	37.0461	119.457
0.0948597	0.18886	0.275308	0.343738	0.399428	0.493831	0.564724	0.649139	0.748335	0.835435	0.936044	1.03877	1.20111	1.30485	1.44337	1.53933	1.64735	1.76637	1.9073	2.07964	2.43589	2.96073	3.70646	4.57711	6.08802	9.29254	15.6606	23.6991	37.7875	122.585
0.0952687	0.190094	0.276223	0.346394	0.400149	0.494756	0.566043	0.651654	0.749616	0.847225	0.952819	1.03955	1.2047	1.31744	1.44646	1.55488	1.65175	1.76838	1.92005	2.08464	2.45812	2.9795	3.72139	4.61286	6.17985	9.43243	15.7519	23.7547	37.913	125.079
0.0970711	0.193211	0.276907	0.346773	0.405755	0.495817	0.567209	0.660841	0.755668	0.850804	0.954193	1.03983	1.20852	1.32194	1.4491	1.55546	1.65776	1.78083	1.92396	2.09046	2.48773	2.99723	3.80544	4.70161	6.19068	9.48183	16.1043	25.0731	37.9515	127.268
0.0983815	0.193774	0.279851	0.347488	0.409309	0.497468	0.568162	0.661179	0.765805	0.873779	0.955713	1.04294	1.20946	1.32329	1.46697	1.5601	1.6627	1.79845	1.9366	2.11904	2.4879	3.00657	3.85158	4.71648	6.26107	9.49065	16.1141	25.1016	38.0146	135.402
0.0983958	0.195244	0.282406	0.348029	0.41774	0.497747	0.569085	0.66582	0.772378	0.893266	0.956723	1.04513	1.20971	1.32526	1.46901	1.56352	1.67087	1.80202	1.93682	2.16181	2.49989	3.03826	3.86242	4.72114	6.44089	9.52732	16.2257	25.2396	38.0936	135.804
0.0992105	0.196468	0.283306	0.348029	0.418399	0.500321	0.569086	0.668319	0.78279	0.895523	0.969092	1.0456	1.21064	1.32526	1.4763	1.57158	1.67097	1.80228	1.94022	2.17261	2.50771	3.11287	3.86659	4.77341	6.48953	9.57238	16.4276	25.5582	38.3688	137.152
0.0994371	0.196582	0.285126	0.350928	0.419944	0.500952	0.574001	0.670031	0.784692	0.897713	0.979663	1.04578	1.21133	1.32688	1.47725	1.57847	1.67609	1.81547	1.95301	2.19082	2.53626	3.11694	3.91376	4.98714	6.54794	9.7882	16.7843	26.0092	38.4569	138.536
0.100674	0.19659	0.2866	0.356031	0.420845	0.508188	0.575637	0.676959	0.788673	0.911232	0.988906	1.04959	1.21572	1.3288	1.48034	1.58419	1.68293	1.82624	1.9561	2.21049	2.55401	3.12868	3.94244	5.04942	6.60339	9.92036	16.9662	26.0772	38.8524	162.427
0.101214	0.196659	0.287172	0.360475	0.425373	0.509828	0.584891	0.691815	0.789962	0.911665	0.990508	1.05673	1.22	1.33108	1.48363	1.60044	1.68428	1.82705	2.01118	2.23397	2.55668	3.19922	3.94982	5.07157	6.7575	9.92463	16.982	26.1045	39.2291	164.446
0.102044	0.199599	0.289343	0.367093	0.425425	0.514364	0.586578	0.69834	0.794403	0.913142	0.993972	1.05856	1.22126	1.33548	1.48547	1.60117	1.68558	1.83375	2.01257	2.23954	2.56294	3.2372	3.95046	5.07701	6.86183	10.2204	17.3381	26.4708	39.3965	178.723
0.102272	0.200626	0.290172	0.368675	0.426768	0.517856	0.590988	0.699959	0.79467	0.914608	0.994438	1.06523	1.22523	1.33818	1.48822	1.6028	1.68776	1.83854	2.0136	2.27362	2.58817	3.3579	3.99965	5.31243	6.91184	10.2916	17.3771	26.9863	39.4195	180.992
0.103437	0.201199	0.290239	0.369465	0.434026	0.518062	0.594647	0.703164	0.797261	0.91461	1.00016	1.07469	1.22873	1.34079	1.48844	1.61048	1.68864	1.84403	2.01519	2.28167	2.58969	3.45409	4.1311	5.34687	6.97885	10.7945	17.6691	27.0293	39.695	194.962
0.103811	0.202116	0.292608	0.371717	0.441147	0.519696	0.595945	0.709085	0.823883	0.916081	1.00571	1.08067	1.23047	1.34928	1.49035	1.61587	1.69808	1.8489	2.03493	2.28582	2.60198	3.49373	4.28802	5.42859	7.00973	10.9283	17.8295	27.3032	39.8028	196.02
0.104007	0.203647	0.293357	0.37327	0.442909	0.52049	0.599783	0.717873	0.829156	0.916553	1.0139	1.09095	1.2318	1.35674	1.4986	1.61903	1.70007	1.86979	2.03862	2.32289	2.60349	3.61128	4.29784	5.46417	7.5236	11.1179	18.1343	27.3508	40.2304	209.197
0.104799	0.204055	0.297478	0.374613	0.444109	0.52482	0.610422	0.731395	0.834198	0.92377	1.01467	1.10056	1.23394	1.36163	1.51222	1.62815	1.70201	1.89388	2.10318	2.33281	2.6082	3.63038	4.30533	5.47504	7.68766	11.1446	18.3336	27.7203	40.2754
0.105481	0.204545	0.298078	0.376997	0.451901	0.526113	0.615915	0.731459	0.843876	0.926962	1.02264	1.10056	1.23417	1.36606	1.5144	1.63069	1.7062	1.9067	2.11058	2.34751	2.67249	3.64187	4.33176	5.55213	7.77481	11.5337	18.4865	27.805	41.5193
0.105692	0.205448	0.298299	0.37756	0.456649	0.532104	0.625632	0.734151	0.849505	0.930735	1.03345	1.10878	1.23505	1.37974	1.51448	1.63186	1.71211	1.90864	2.12022	2.36038	2.75478	3.64525	4.40201	5.55213	7.83259	11.616	18.8643	28.0518	42.5458
0.105754	0.206676	0.298667	0.378181	0.45824	0.532681	0.634049	0.739007	0.85015	0.940048	1.03479	1.1184	1.23876	1.38433	1.53054	1.63851	1.71959	1.91844	2.12785	2.37634	2.76071	3.68142	4.41142	5.65394	7.83561	11.7116	19.0858	28.0699	42.5683
0.105826	0.209148	0.300336	0.38457	0.459109	0.542562	0.634349	0.739887	0.853944	0.944432	1.04268	1.12162	1.24863	1.38506	1.53409	1.6497	1.73643	1.92745	2.13214	2.37664	2.76093	3.70099	4.45303	5.69877	8.19533	12.3005	19.349	28.4726	43.8023
0.106079	0.210212	0.301168	0.387632	0.461969	0.543579	0.635521	0.741466	0.856462	0.949368	1.04344	1.13945	1.25484	1.39151	1.54616	1.65412	1.74246	1.92939	2.13975	2.37938	2.78423	3.76451	4.57714	5.7081	8.25057	12.3074	19.368	28.7551	44.8311
0.106176	0.211005	0.307512	0.388696	0.463013	0.550282	0.639909	0.744141	0.857196	0.953783	1.05856	1.1441	1.25628	1.40266	1.54721	1.65525	1.76425	1.93294	2.16529	2.37963	2.85792	3.79769	4.61768	5.82128	8.46142	12.4297	19.5628	29.3932	46.9674
0.106735	0.211316	0.308368	0.389592	0.465855	0.550282	0.64294	0.745048	0.858916	0.96739	1.06013	1.14771	1.25963	1.40316	1.55188	1.6706	1.76511	1.94118	2.19094	2.38256	2.92532	3.79774	4.66916	5.87568	8.65593	12.4388	19.5666	29.4443	47.8595
0.108237	0.211428	0.309422	0.39103	0.467347	0.55465	0.643434	0.749071	0.860424	0.971492	1.06112	1.14882	1.26184	1.40961	1.55325	1.67949	1.7688	1.9415	2.20023	2.38399	2.93411	3.8219	4.71473	6.08802	8.70769	12.6562	19.6999	29.6993	49.2893
0.108864	0.211524	0.311388	0.39537	0.470125	0.561004	0.643734	0.749382	0.86565	0.971687	1.06201	1.14897	1.26191	1.40972	1.55771	1.67952	1.77052	1.94891	2.20586	2.40457	2.96376	3.85772	4.71496	6.11126	8.8421	12.7069	19.7946	29.7491	49.7113
0.109035	0.211602	0.313965	0.396221	0.478872	0.561565	0.650262	0.74975	0.866368	0.977361	1.06951	1.15018	1.26241	1.41228	1.55812	1.6825	1.78668	1.97044	2.21045	2.43523	2.986	3.94702	4.7414	6.14868	9.22441	13.2982	19.8644	29.9748	50.0735
0.110559	0.214486	0.316054	0.396528	0.479205	0.563197	0.66472	0.752509	0.874487	0.985973	1.07104	1.17096	1.26298	1.41393	1.56008	1.69151	1.78915	1.9838	2.21514	2.43734	3.03197	4.00361	4.92764	6.15234	9.27222	13.3889	19.9148	30.0488	50.3266
0.110582	0.215137	0.31621	0.39757	0.48639	0.566483	0.668273	0.753396	0.875261	0.986892	1.07822	1.17115	1.26762	1.41979	1.56135	1.70371	1.83854	1.99431	2.22313	2.48051	3.08318	4.03526	4.93262	6.27033	9.35162	13.5655	20.1227	30.1762	50.8746
0.110855	0.216474	0.316387	0.402011	0.491221	0.568706	0.671492	0.75543	0.881812	0.989466	1.08179	1.18068	1.27823	1.42245	1.56325	1.7121	1.84488	1.99579	2.24518	2.48395	3.1234	4.08266	4.96057	6.45604	9.41324	14.1407	20.2977	30.8553	51.063
0.111436	0.216826	0.316485	0.403709	0.492188	0.574472	0.671669	0.758266	0.887304	0.99094	1.08221	1.19051	1.28134	1.42446	1.56376	1.71402	1.85258	2.01911	2.257	2.4936	3.1419	4.12498	5.01935	6.48666	9.46742	14.5747	20.3008	31.5166	51.1259
0.111449	0.219041	0.318033	0.406058	0.492188	0.575029	0.684598	0.768308	0.88852	0.992188	1.08822	1.19099	1.29029	1.43496	1.56526	1.71911	1.85357	2.02045	2.25875	2.49571	3.19922	4.12692	5.01935	6.50172	9.57555	14.6728	20.9194	31.6706	52.5882
0.112872	0.219772	0.319319	0.40623	0.492188	0.579319	0.685509	0.770472	0.890468	0.993412	1.09912	1.19701	1.29821	1.43697	1.56928	1.72251	1.86218	2.05249	2.26887	2.49692	3.2803	4.14968	5.22044	6.64488	9.58217	15.2121	21.0204	32.0841	52.8433
0.114351	0.2216	0.31934	0.406651	0.496094	0.579859	0.687432	0.782198	0.897204	0.994511	1.10116	1.19812	1.30162	1.44019	1.5713	1.72462	1.86487	2.06082	2.29475	2.52934	3.2833	4.17635	5.27161	6.7065	9.58503	15.4883	21.2406	32.164	53.8023
0.11456	0.222809	0.321138	0.408861	0.496778	0.585252	0.696809	0.784128	0.900013	1.00245	1.10885	1.20128	1.31999	1.44396	1.58282	1.72646	1.87419	2.081	2.29915	2.54969	3.36131	4.17908	5.31589	6.7575	9.64705	15.5966	21.4217	32.3777	54.3976
0.114679	0.223002	0.323104	0.413129	0.498123	0.586097	0.697825	0.784393	0.901759	1.00484	1.11033	1.2025	1.32526	1.4466	1.59653	1.729	1.87805	2.09147	2.32508	2.59376	3.46665	4.18316	5.33443	6.7756	9.73489	16.1168	21.4328	33.0558	54.5093
0.115371	0.223346	0.325702	0.413227	0.500011	0.590496	0.698435	0.790961	0.914384	1.01455	1.11265	1.2044	1.32561	1.45039	1.60499	1.73595	1.88818	2.10495	2.32751	2.60034	3.61453	4.20969	5.39998	6.83708	9.8921	16.1279	21.6576	33.1515	55.132
0.115535	0.224758	0.326475	0.414808	0.502769	0.593568	0.705259	0.791641	0.915063	1.01605	1.11877	1.21114	1.3263	1.45479	1.60555	1.74945	1.90327	2.10893	2.33458	2.63677	3.61551	4.26249	5.40286	6.88057	10.0194	16.2421	21.7437	33.7389	56.118
0.115954	0.225789	0.32725	0.415415	0.505602	0.594696	0.707363	0.791866	0.926798	1.02272	1.12412	1.21291	1.32852	1.46003	1.6081	1.75495	1.92176	2.11277	2.3363	2.72311	3.64219	4.36029	5.54178	6.93333	10.1931	16.2881	22.8337	33.739	56.154
0.116298	0.226001	0.328858	0.415454	0.50949	0.598108	0.711967	0.795756	0.951204	1.02502	1.12452	1.21703	1.32991	1.47208	1.61292	1.75676	1.92489	2.1234	2.36727	2.73352	3.67795	4.39105	5.55213	6.96058	10.3692	16.3371	23.183	33.8085	56.7549
0.116591	0.22886	0.329758	0.416532	0.50981	0.601004	0.712152	0.800014	0.953106	1.02612	1.12616	1.21835	1.33206	1.48387	1.61648	1.76689	1.92607	2.12937	2.37263	2.77344	3.71106	4.40785	5.55213	7.6503	10.4467	16.7217	23.4075	33.8462	56.7576
0.116725	0.229391	0.330295	0.420028	0.518554	0.601253	0.714719	0.805369	0.956733	1.03812	1.13679	1.22806	1.33302	1.49209	1.61692	1.77028	1.93019	2.13399	2.39004	2.79543	3.81609	4.43345	5.55619	7.68675	10.7114	16.7723	23.7275	34.0053	56.982
0.116929	0.230175	0.331909	0.420358	0.522024	0.604418	0.715455	0.807802	0.959056	1.04643	1.13759	1.23047	1.34037	1.49693	1.61882	1.77886	1.9317	2.1391	2.39851	2.82817	3.82151	4.45064	5.56847	7.74588	11.0812	16.805	23.8245	34.1375	57.6747
0.117036	0.230767	0.335973	0.424058	0.524642	0.612701	0.716063	0.813966	0.959719	1.05349	1.1385	1.2378	1.34517	1.50168	1.63584	1.80381	1.9623	2.14442	2.41085	2.9065	3.83844	4.46791	5.59452	7.83259	11.323	17.0208	24.1749	34.3528	57.9243
0.117113	0.231043	0.33621	0.424776	0.525003	0.614924	0.720811	0.839065	0.960278	1.05672	1.14498	1.24096	1.35458	1.50782	1.65072	1.80549	1.96673	2.1593	2.41322	2.98308	3.87784	4.53774	5.73683	7.90795	11.4584	17.2428	24.1937	34.3903	58.4357
0.11761	0.234765	0.336987	0.425968	0.528719	0.615552	0.727082	0.845775	0.960931	1.06527	1.14634	1.24777	1.3644	1.51099	1.65479	1.80784	1.97206	2.1712	2.43012	3.004	3.90422	4.60423	5.74512	7.94391	11.8125	17.3684	24.2686	34.9929	60.4379
0.117867	0.235525	0.338092	0.426654	0.529328	0.615911	0.732153	0.855641	0.964447	1.07333	1.15066	1.25782	1.37216	1.51232	1.66581	1.81406	1.97723	2.18454	2.44683	3.01418	3.94717	4.64106	5.79236	7.97533	11.8754	17.3777	24.7747	35.2567	60.8971
0.117946	0.236586	0.341445	0.428459	0.536711	0.617015	0.732547	0.858317	0.964913	1.07496	1.15076	1.26156	1.37245	1.52844	1.66793	1.82221	1.97971	2.19044	2.45306	3.03498	3.96144	4.73204	5.90089	8.13286	11.9846	17.5391	24.943	35.2581	61.664
0.118389	0.237078	0.341848	0.433774	0.536985	0.620232	0.734469	0.859656	0.972278	1.07516	1.15735	1.26185	1.37507	1.53058	1.67981	1.82509	1.98043	2.20503	2.45632	3.04899	4.00679	4.77828	5.92092	8.27401	12.3071	17.5464	25.1206	35.3496	62.02
0.118571	0.238643	0.342962	0.434608	0.541854	0.621422	0.749093	0.861584	0.97326	1.07947	1.158	1.26333	1.37522	1.53575	1.69124	1.82797	1.9972	2.22132	2.46479	3.05021	4.02535	4.83166	5.94919	8.3527	12.3101	17.6179	25.5632	35.4015	63.2849
0.121276	0.239093	0.343034	0.4371	0.547164	0.626982	0.752343	0.870915	0.976231	1.08427	1.16795	1.2685	1.37656	1.53911	1.69244	1.83862	1.99933	2.23229	2.53149	3.08362	4.03159	4.91153	5.95221	8.65537	12.452	17.6228	25.9226	35.5259	65.2385
0.121298	0.245876	0.345208	0.446101	0.547568	0.638156	0.765446	0.871979	0.988795	1.08446	1.17063	1.26988	1.378	1.54471	1.69424	1.84015	2.00099	2.27105	2.55978	3.08599	4.05017	4.92802	5.99635	8.67099	12.4641	17.7473	25.9882	36.2652	65.7149
0.12216	0.246094	0.348029	0.458237	0.549763	0.64669	0.765968	0.873114	0.993432	1.0936	1.17149	1.2738	1.37812	1.54588	1.71185	1.86306	2.02335	2.28553	2.6583	3.08734	4.15489	4.93421	6.07119	8.79419	12.5297	17.7584	26.4708	36.5544	67.1915
0.12231	0.246094	0.348029	0.458317	0.550282	0.648501	0.770385	0.874464	0.995989	1.09859	1.19247	1.28118	1.38497	1.54727	1.71687	1.86693	2.03178	2.30734	2.66364	3.17622	4.15645	4.99718	6.13363	9.15972	12.5725	18.0053	26.7692	36.6029	69.0279
0.122608	0.246094	0.348029	0.458897	0.550282	0.654718	0.774571	0.879498	0.998899	1.10056	1.19702	1.3183	1.3855	1.57544	1.72417	1.86705	2.03788	2.30829	2.6769	3.19922	4.15791	5.00094	6.44378	9.30286	12.8601	18.115	26.8147	36.635	69.9136
0.122913	0.246094	0.348029	0.460145	0.553825	0.655524	0.775958	0.880809	1.00289	1.10428	1.20022	1.3244	1.39146	1.57708	1.72959	1.87206	2.0606	2.32502	2.70552	3.2833	4.17987	5.02714	6.61877	9.41975	12.9986	18.1675	26.9026	37.0845	70.4348
0.125306	0.247437	0.348029	0.462041	0.55465	0.655605	0.77656	0.88155	1.00451	1.10577	1.21051	1.33082	1.40267	1.58176	1.73649	1.88202	2.06304	2.34057	2.72398	3.31085	4.19206	5.12088	6.64909	9.51772	13.6278	18.256	27.0703	37.1303	71.5304
0.12652	0.248047	0.348029	0.462387	0.557796	0.656481	0.778217	0.883945	1.00687	1.10628	1.21177	1.33388	1.42036	1.58318	1.74565	1.89084	2.07889	2.34737	2.76721	3.45919	4.24398	5.19675	6.70103	9.54297	13.7747	18.3913	27.1934	37.1682	71.7109
0.126535	0.248047	0.348029	0.462543	0.559197	0.656495	0.781089	0.886678	1.0124	1.11099	1.21321	1.33442	1.42876	1.58648	1.75673	1.90006	2.08951	2.34989	2.79419	3.46084	4.24824	5.24338	6.75637	9.63668	14.0659	18.4097	27.375	37.481	71.7485
0.127402	0.248047	0.348809	0.470629	0.560443	0.670907	0.782753	0.888714	1.01465	1.11205	1.21515	1.3376	1.43496	1.58668	1.75676	1.9057	2.09342	2.35785	2.83909	3.57133	4.34726	5.26088	6.75798	9.66289	14.2756	18.8175	27.645	37.5281	72.4464
0.1275	0.248047	0.350791	0.472799	0.562027	0.67105	0.784393	0.89246	1.01467	1.11627	1.2204	1.34196	1.43671	1.5881	1.76433	1.91034	2.10079	2.40628	2.88437	3.5734	4.3511	5.26088	6.7691	9.74482	14.2781	19.1183	27.789	37.6508	75.088
0.127581	0.248047	0.350791	0.473367	0.563804	0.672015	0.784393	0.897952	1.01704	1.11718	1.22844	1.35453	1.46573	1.60089	1.77676	1.92126	2.11052	2.4089	2.93309	3.58142	4.42319	5.26683	6.80662	9.924	14.4882	19.137	27.9094	37.8286	75.6505
0.127888	0.250199	0.352744	0.474225	0.565897	0.675894	0.786298	0.902554	1.01924	1.12709	1.23021	1.35696	1.47647	1.61404	1.78661	1.93785	2.11343	2.41868	2.959	3.61233	4.42969	5.5028	6.80662	9.93423	14.6945	19.1634	28.2169	37.9157	75.9999
0.127992	0.251449	0.354204	0.478299	0.565991	0.685841	0.793933	0.905869	1.01994	1.12725	1.23047	1.36985	1.47656	1.63011	1.79159	1.93917	2.12904	2.47647	2.99182	3.6221	4.49133	5.52494	6.85538	10.0206	14.8983	19.2176	28.3447	38.1129	77.5914
0.128075	0.254801	0.359552	0.48011	0.56767	0.690031	0.800297	0.916901	1.02272	1.13054	1.23303	1.37403	1.49032	1.64072	1.79159	1.945	2.13786	2.47761	3.00848	3.66427	4.54897	5.5292	6.91119	10.0249	15.2172	19.259	28.7073	38.1289	77.6007
0.128131	0.25532	0.359834	0.480801	0.568159	0.692365	0.804466	0.918834	1.02756	1.13759	1.23309	1.38206	1.49465	1.64166	1.82397	1.94687	2.15379	2.48787	3.06647	3.66703	4.59798	5.55213	6.98043	10.169	15.251	19.2792	28.9659	38.2911	78.3314
0.128148	0.256667	0.359874	0.482841	0.570539	0.694053	0.808119	0.920732	1.03141	1.14149	1.24136	1.38277	1.50557	1.65705	1.82679	1.96201	2.16795	2.49061	3.07968	3.72149	4.67994	5.57798	7.3291	10.6078	15.27	19.4047	29.0636	38.386	79.3521
0.129107	0.257461	0.36037	0.483088	0.572132	0.694893	0.808169	0.923721	1.03526	1.14222	1.24529	1.38513	1.50939	1.65866	1.83992	1.96721	2.17778	2.50804	3.08355	3.74808	4.70161	5.66752	7.35784	10.676	15.3291	19.6167	29.1868	38.4039	79.9383
0.130597	0.259279	0.361736	0.487437	0.575255	0.697271	0.811955	0.924008	1.03608	1.14573	1.25765	1.3859	1.51425	1.67974	1.84372	1.98799	2.21746	2.52854	3.08745	3.76372	4.73371	5.69735	7.48465	10.7861	15.4006	19.6186	29.1888	38.4087	80.1352
0.131444	0.262507	0.366058	0.490752	0.576392	0.697418	0.813735	0.927113	1.03966	1.14817	1.27671	1.39205	1.51795	1.6818	1.86227	1.99021	2.22512	2.56204	3.1154	3.76451	4.79394	5.70108	7.66455	10.9753	15.4413	19.698	29.1902	38.4152	80.2791
0.131511	0.264403	0.370457	0.493185	0.584491	0.700147	0.815479	0.928001	1.0403	1.15028	1.282	1.39212	1.5217	1.69282	1.86955	2.00024	2.22639	2.56841	3.13047	3.7684	4.82415	5.70376	7.70045	11.0904	15.4799	20.3783	29.3488	38.4174	81.5328
0.132457	0.265216	0.372689	0.494031	0.591726	0.701583	0.817775	0.93003	1.042	1.15106	1.28793	1.39286	1.53727	1.69904	1.87629	2.0178	2.22656	2.65754	3.23576	3.86611	4.85373	5.7792	7.79929	11.1489	15.5766	21.2041	29.6099	38.5594	81.5763
0.132858	0.267705	0.374038	0.500498	0.598366	0.706143	0.818311	0.930321	1.04619	1.15844	1.28865	1.41569	1.53818	1.70067	1.88025	2.03746	2.2345	2.6609	3.2833	3.90234	4.85457	5.81729	7.97435	11.1787	15.7329	21.3979	29.6492	38.6823	82.3135
0.132872	0.268652	0.374472	0.500628	0.598485	0.706253	0.818377	0.938232	1.05257	1.16058	1.32223	1.41714	1.54139	1.70262	1.8823	2.05755	2.26647	2.70852	3.28572	3.92559	4.92074	5.83047	8.03606	11.4277	15.7523	21.6576	29.7443	38.7565	84.0804
0.133175	0.268958	0.375553	0.502416	0.601881	0.708955	0.820814	0.939303	1.05271	1.1612	1.33163	1.41744	1.55228	1.71754	1.89088	2.06074	2.26812	2.70978	3.40505	3.95098	4.94642	5.84958	8.12038	11.8376	16.0572	21.6632	29.858	38.8778	84.9654
0.133748	0.270261	0.379459	0.504305	0.603136	0.709183	0.822177	0.945171	1.07506	1.16201	1.3371	1.44784	1.55954	1.71896	1.91427	2.06694	2.26919	2.76265	3.40879	3.98195	4.98425	5.91246	8.25424	11.8381	16.0775	21.9369	29.8888	38.9148	85.046
0.13487	0.270405	0.380171	0.506897	0.609837	0.712941	0.825824	0.961078	1.0785	1.16527	1.34384	1.45371	1.55996	1.72879	1.92778	2.09119	2.28617	2.78922	3.45394	4.07429	5.01935	5.98772	8.35385	11.9779	16.0862	22.2535	30.1579	39.1343	85.4073
0.135306	0.270592	0.381365	0.509104	0.613772	0.719487	0.830531	0.964002	1.0824	1.18335	1.34663	1.46024	1.56014	1.72955	1.93867	2.11343	2.29454	2.8059	3.46167	4.08336	5.01935	5.98772	8.47779	12.1217	16.3034	22.3018	30.7495	39.2902	86.1068
0.136361	0.271745	0.382269	0.511137	0.620232	0.730361	0.836722	0.96509	1.08439	1.18546	1.34784	1.47676	1.56882	1.72988	1.93875	2.12663	2.31262	2.81506	3.46295	4.10739	5.172	6.01238	8.75308	12.3813	16.3362	22.5817	30.8353	40.4044	86.3803
0.136811	0.272488	0.384984	0.512886	0.626231	0.730712	0.844928	0.967972	1.08442	1.18568	1.34921	1.48712	1.57577	1.74015	1.9421	2.12686	2.36942	2.82932	3.4878	4.16989	5.17879	6.09299	8.79419	12.436	16.3779	22.8019	31.68	40.5182	86.5111
0.1374	0.273129	0.385634	0.513361	0.626443	0.733094	0.85205	0.971918	1.08911	1.19016	1.35905	1.49693	1.57577	1.74302	1.97415	2.13529	2.37222	2.83509	3.51108	4.29842	5.18546	6.172	8.87645	12.473	16.4055	22.9434	31.7194	40.8131	86.6145
0.137511	0.273209	0.386811	0.513503	0.629631	0.733628	0.854691	0.972769	1.09584	1.20161	1.37569	1.50012	1.59461	1.748	1.97578	2.13849	2.39503	2.85278	3.54382	4.34509	5.18653	6.21891	8.98158	12.5384	16.5763	23.3317	31.9275	42.5247	86.832
0.137803	0.274831	0.389648	0.514698	0.630016	0.737659	0.861845	0.973975	1.10056	1.20204	1.3881	1.50755	1.61946	1.77199	1.99064	2.1492	2.40374	2.86591	3.6864	4.36088	5.19437	6.35195	9.06228	12.5604	16.7302	23.3391	32.0276	42.7029	87.0647
0.13784	0.277221	0.389889	0.516429	0.631228	0.737764	0.866045	0.978301	1.11301	1.20594	1.38995	1.50913	1.62283	1.77461	1.99375	2.15743	2.44699	2.86992	3.71774	4.40162	5.25758	6.44	9.13005	12.5993	16.9225	23.3864	32.2708	43.9183	88.4991
0.138328	0.277643	0.392129	0.5174	0.634441	0.738281	0.868161	0.980434	1.11367	1.20679	1.4013	1.50965	1.62499	1.78923	1.99665	2.17323	2.447	2.88447	3.71942	4.40787	5.26088	6.53887	9.34371	12.7898	16.9921	23.4629	32.3171	44.0808	88.8807
0.138442	0.278806	0.394354	0.518157	0.634946	0.738281	0.869797	0.981711	1.11588	1.22417	1.40174	1.52049	1.63382	1.79688	2.00601	2.18734	2.47149	2.88952	3.74485	4.4547	5.26088	6.54444	9.37513	12.8233	17.242	23.5955	32.3595	44.6796	88.9516
0.138906	0.281562	0.39458	0.51868	0.635434	0.738281	0.870655	0.991552	1.12315	1.2243	1.40817	1.52521	1.64592	1.80194	2.01472	2.18846	2.50754	2.91734	3.76451	4.49079	5.43635	6.61762	9.68017	13.0753	17.3684	23.895	32.3614	45.041	89.2113
0.138924	0.281588	0.395102	0.519122	0.637372	0.738281	0.871264	0.991897	1.1233	1.23047	1.40859	1.53433	1.65236	1.80216	2.01633	2.19339	2.52967	2.93302	3.78386	4.49079	5.44177	6.7984	9.74853	13.2096	17.4896	24.0724	32.632	46.5169	89.2832
0.139792	0.281673	0.39511	0.52095	0.640222	0.73884	0.873553	0.992723	1.13054	1.23047	1.40862	1.53957	1.66442	1.80453	2.03964	2.23045	2.57807	3.02114	3.79319	4.56908	5.44848	6.80542	9.92827	13.4015	17.5081	24.1332	32.8109	47.0676	90.183
0.140756	0.285289	0.396589	0.522072	0.640363	0.742913	0.876455	0.992769	1.13165	1.2322	1.4181	1.54664	1.67023	1.82503	2.04979	2.23449	2.63717	3.07307	3.80035	4.64894	5.47751	7.04834	10.1123	13.4869	17.5169	24.2174	33.2443	47.1806	94.1256
0.140926	0.285313	0.396613	0.523002	0.643974	0.749219	0.881075	0.998823	1.13559	1.23281	1.41936	1.54877	1.6716	1.82661	2.06103	2.25476	2.64968	3.11287	3.84411	4.73371	5.50041	7.04857	10.1779	13.5957	17.6811	24.5734	33.3125	47.2737	95.6849
0.141607	0.285391	0.397606	0.526721	0.644926	0.751829	0.887304	0.999138	1.13812	1.23526	1.42189	1.54899	1.67194	1.83035	2.06817	2.27245	2.65722	3.12598	3.86412	4.73991	5.57058	7.15822	10.2278	13.6767	17.7453	24.988	33.3277	48.4697	99.4
0.142191	0.286346	0.398026	0.528517	0.647074	0.757227	0.888895	1.00778	1.13994	1.23534	1.43085	1.55183	1.67531	1.85652	2.07338	2.29271	2.65873	3.16977	3.89223	4.79996	5.73166	7.16636	10.254	13.707	18.0265	25.0448	33.3897	48.8674	100.042
0.142497	0.287818	0.400388	0.529816	0.652845	0.769758	0.888993	1.01467	1.15602	1.23718	1.44938	1.55881	1.6763	1.86247	2.10263	2.31066	2.68528	3.22966	3.91169	4.83864	5.7781	7.17892	10.2683	14.2052	18.0472	25.6999	33.445	49.415	103.843
0.143073	0.288061	0.40524	0.537241	0.654726	0.770861	0.891287	1.01467	1.15731	1.25484	1.45205	1.55943	1.68229	1.86911	2.10517	2.3368	2.71792	3.23415	3.92992	4.92802	5.82111	7.23859	10.5706	14.2925	18.3812	25.9502	33.4949	49.4845	104.456
0.14312	0.28918	0.40765	0.538689	0.659639	0.773338	0.900484	1.01467	1.15835	1.25484	1.4537	1.56068	1.68948	1.8796	2.10663	2.35708	2.74713	3.33446	3.95237	5.0146	5.83756	7.69215	10.6121	14.3292	18.3913	26.008	33.8826	49.8719	105.876
0.143655	0.28992	0.408672	0.541702	0.663611	0.774775	0.900534	1.02318	1.16442	1.25889	1.45474	1.57203	1.69454	1.89457	2.11629	2.38067	2.76384	3.37793	3.96814	5.01935	5.84264	7.71592	11.1055	14.4666	18.6139	26.226	33.9765	50.0569	106.103
0.144173	0.290018	0.414164	0.543984	0.666497	0.778217	0.90283	1.02733	1.16504	1.26145	1.4591	1.58454	1.69579	1.92261	2.11698	2.39891	2.79925	3.39105	4.00612	5.05864	5.84958	7.77804	11.1939	14.4882	18.6272	26.2925	34.2355	50.6144	106.691
0.144436	0.290415	0.415088	0.544807	0.668982	0.778217	0.908725	1.02775	1.16594	1.26426	1.46827	1.58904	1.69947	1.93712	2.12096	2.40424	2.8259	3.43122	4.00782	5.05909	5.88168	7.79886	11.2037	14.5425	18.6775	26.4708	34.3542	51.1213	107.294
0.144606	0.291128	0.416293	0.546597	0.671785	0.785257	0.909169	1.03165	1.17262	1.26885	1.47861	1.59515	1.71553	1.94416	2.15122	2.42374	2.82926	3.4799	4.08163	5.10557	5.94857	7.82098	11.2702	14.7053	18.7013	26.5549	34.5406	51.4833	107.769
0.145404	0.291394	0.417503	0.550282	0.682774	0.788716	0.911385	1.03267	1.18329	1.28652	1.48132	1.59782	1.71591	1.98206	2.16969	2.43467	2.86992	3.48029	4.12627	5.11127	5.99945	8.01223	11.3444	14.913	18.7495	26.653	34.5999	51.693	108.308
0.145479	0.291853	0.417996	0.550282	0.690615	0.789638	0.91158	1.04508	1.19117	1.28755	1.48231	1.60353	1.71726	1.99454	2.17662	2.44882	2.87136	3.56509	4.16682	5.17317	6.03306	8.10494	11.4432	14.9146	18.8193	26.6845	34.8469	53.2426	108.785
0.145514	0.292098	0.421234	0.550282	0.691139	0.791891	0.911697	1.0456	1.1913	1.29772	1.48338	1.61023	1.72372	2.00564	2.18729	2.4573	2.88045	3.57659	4.18742	5.17515	6.04997	8.18418	11.4784	15.0216	18.8724	26.7089	34.9392	53.3952	109.523
0.145524	0.292508	0.423744	0.550282	0.694905	0.793132	0.912906	1.04866	1.19618	1.3027	1.48405	1.61657	1.74015	2.04714	2.19859	2.46094	2.89482	3.58259	4.18807	5.23202	6.08802	8.38088	11.4902	15.166	19.0178	27.2437	35.0991	53.493	113.36
0.145589	0.292545	0.424195	0.550282	0.696058	0.79933	0.914023	1.05271	1.20116	1.30337	1.49693	1.61776	1.74093	2.04947	2.1999	2.51006	2.92979	3.64403	4.28774	5.24057	6.11284	8.42146	11.4902	15.2805	19.0884	27.2805	35.2353	54.0776	113.567
0.145796	0.293633	0.424382	0.550282	0.704955	0.800658	0.920187	1.05736	1.20377	1.30965	1.49693	1.61849	1.75601	2.06212	2.22847	2.51352	2.94428	3.6765	4.31562	5.29045	6.28273	8.47506	11.6439	15.3291	19.3164	27.3865	35.3064	54.138	114.069
0.146312	0.294103	0.425551	0.553218	0.706322	0.802083	0.922715	1.07431	1.20654	1.3136	1.50045	1.63463	1.75832	2.0623	2.23936	2.5194	2.98362	3.70195	4.32369	5.2923	6.29411	8.72853	11.833	15.4896	19.354	27.4602	35.4212	54.1496	115.523
0.146462	0.295037	0.42843	0.55465	0.706988	0.806555	0.928001	1.07635	1.20716	1.32218	1.50159	1.64649	1.76425	2.07786	2.2483	2.52099	2.98893	3.76451	4.37507	5.29287	6.29447	8.79436	11.8355	15.4912	19.3541	27.5961	35.4584	54.6145	116.165
0.147419	0.295105	0.42851	0.55465	0.708721	0.807017	0.929127	1.07842	1.20908	1.33695	1.5157	1.67988	1.76613	2.09	2.25947	2.5212	2.99688	3.77154	4.44292	5.35528	6.32705	8.87304	11.8381	15.4941	19.4255	27.6253	36.0315	54.6583	116.774
0.147555	0.296274	0.430862	0.55465	0.710723	0.808217	0.929893	1.08482	1.21088	1.33794	1.51881	1.6924	1.76761	2.09855	2.27869	2.54694	3.04065	3.80097	4.4708	5.4556	6.45797	9.02866	11.9313	15.5921	19.7647	27.6268	36.684	54.6998	118.522
0.147725	0.298603	0.431338	0.55481	0.71105	0.815479	0.931641	1.089	1.21889	1.33894	1.52643	1.69651	1.76898	2.10263	2.30394	2.54909	3.07033	3.80099	4.49079	5.48511	6.62171	9.0466	12.169	15.7618	19.9867	27.7175	36.7744	55.0338	119.402
0.14837	0.299711	0.432376	0.555532	0.713124	0.819568	0.93961	1.08992	1.21972	1.36346	1.53125	1.69838	1.7692	2.10263	2.3052	2.55189	3.0759	3.81099	4.50711	5.55213	6.64909	9.28793	12.181	15.96	20.4255	28.2374	36.8222	55.1119	119.902
0.148828	0.29975	0.434113	0.5579	0.713854	0.819671	0.944245	1.09169	1.22025	1.36747	1.54428	1.70017	1.77217	2.10829	2.32283	2.59767	3.07941	3.85903	4.57548	5.72908	6.65646	9.37103	12.2303	16.0049	20.6784	28.5469	36.8489	55.1914	122.048
0.148961	0.302056	0.43511	0.560855	0.71523	0.830211	0.944861	1.09251	1.23695	1.37714	1.54513	1.72261	1.79268	2.11698	2.32615	2.60701	3.16356	3.9084	4.58762	5.75791	6.69447	9.37397	12.2391	16.0348	20.918	28.618	36.8997	55.2156	123.896
0.148989	0.303015	0.436121	0.561751	0.717532	0.835172	0.952347	1.10033	1.24193	1.37968	1.55193	1.72266	1.80341	2.12865	2.32728	2.6338	3.20339	3.92335	4.72898	5.75939	6.71037	9.40323	12.2668	16.0433	20.9352	28.6847	36.9731	55.4638	124.093
0.149618	0.30546	0.43892	0.562036	0.725003	0.840321	0.953422	1.10056	1.25484	1.37968	1.55643	1.73453	1.83994	2.13285	2.33019	2.64626	3.23547	3.9332	4.73662	5.80529	6.7141	9.43217	12.3297	16.1158	20.9838	28.703	37.2847	57.0316	129.671
0.150557	0.306339	0.440176	0.562112	0.736227	0.842613	0.968417	1.10056	1.25484	1.38842	1.55994	1.73956	1.84537	2.14808	2.33341	2.65912	3.25805	3.95005	4.98075	5.87044	6.85366	9.45255	12.5532	16.2189	21.0566	28.7468	37.3711	57.0582	130.274
0.15099	0.306847	0.441179	0.562656	0.737311	0.845749	0.971361	1.10132	1.25484	1.38907	1.57253	1.74118	1.85584	2.18817	2.36368	2.66191	3.30054	3.96814	5.01935	6.0647	6.97146	9.72869	12.5604	16.3452	21.1698	28.9888	37.4369	57.3605	130.857
0.151311	0.307536	0.44921	0.56291	0.738281	0.847687	0.971866	1.10872	1.25484	1.39135	1.57577	1.74398	1.87377	2.1927	2.36992	2.68739	3.32657	3.99076	5.04088	6.08802	6.98081	9.73726	12.7861	16.3477	21.4026	29.2472	37.4488	57.7034	131.57
0.151714	0.308135	0.449542	0.563951	0.738385	0.853167	0.973792	1.10989	1.25484	1.39644	1.57577	1.76408	1.88554	2.20113	2.38021	2.68797	3.34681	4.00612	5.05448	6.09539	7.09951	9.85705	12.9362	16.477	21.7037	29.3256	37.5429	57.7041	133.288
0.151843	0.308624	0.451596	0.565563	0.745718	0.855068	0.982448	1.11254	1.25637	1.39853	1.58405	1.76583	1.89248	2.20113	2.40623	2.73723	3.34724	4.03779	5.06738	6.12571	7.23783	9.94453	13.0369	16.4874	21.7658	29.3696	37.5467	58.3533	134.431
0.152086	0.309119	0.454441	0.566801	0.746571	0.857652	0.983556	1.1133	1.25783	1.39875	1.59215	1.76941	1.90466	2.21691	2.42374	2.75048	3.38099	4.05557	5.09511	6.15234	7.28787	10.2795	13.0422	16.4944	21.7783	29.3757	37.6135	58.7015	134.598
0.152466	0.309582	0.456185	0.572614	0.747783	0.859632	0.984375	1.11666	1.25929	1.40351	1.60898	1.77589	1.91179	2.23704	2.44362	2.75977	3.3821	4.0934	5.13495	6.21421	7.33174	10.4555	13.2348	16.6036	22.2425	29.3994	37.6329	60.4555	135.84
0.153186	0.310025	0.458019	0.574339	0.749162	0.862639	0.987218	1.11761	1.25983	1.40624	1.60942	1.77694	1.92114	2.25017	2.44633	2.77762	3.38939	4.09582	5.15504	6.22573	7.52902	10.5706	13.2431	16.7796	22.9429	29.5758	37.8874	61.3485	157.519
0.153194	0.311571	0.459067	0.580039	0.752457	0.867459	0.990323	1.11999	1.2648	1.42194	1.61099	1.78142	1.93879	2.25825	2.4573	2.82101	3.41996	4.17371	5.1898	6.22998	7.56192	10.6758	13.3142	16.7842	23.1132	29.9487	37.9131	61.5225	158.587
0.153442	0.3121	0.460435	0.581594	0.755483	0.869343	0.992112	1.14053	1.26692	1.42236	1.61802	1.78938	1.96665	2.25997	2.48887	2.82779	3.48029	4.22182	5.20353	6.23163	7.6408	10.7733	13.4634	16.7958	23.1453	29.9629	37.9854	61.8988	159.436
0.153849	0.312463	0.460881	0.581752	0.758735	0.871253	0.995132	1.14891	1.27232	1.42616	1.62334	1.79661	1.96875	2.26007	2.49732	2.88045	3.48029	4.24294	5.24386	6.2565	7.68272	10.7889	13.6819	16.8498	23.2137	30.0474	38.0626	62.3215	160.239
0.153881	0.313829	0.462136	0.589555	0.758808	0.871264	1.00127	1.15139	1.27435	1.42854	1.6319	1.80121	1.97806	2.26375	2.52292	2.8807	3.49932	4.37254	5.31493	6.35094	7.70257	10.7889	13.8185	16.8803	23.3299	30.1368	38.2861	62.3861	170.805
0.154288	0.314204	0.462788	0.590824	0.759788	0.871461	1.00634	1.15298	1.28105	1.45066	1.63881	1.81249	1.97849	2.28005	2.52338	2.9006	3.55562	4.38157	5.37374	6.38897	7.76875	10.8393	13.8363	17.2539	23.5246	30.3141	38.3421	62.5098	175.392
0.155284	0.314377	0.462861	0.592374	0.762316	0.878112	1.007	1.15301	1.2844	1.45893	1.64247	1.8289	1.9861	2.28269	2.54272	2.94083	3.56352	4.38726	5.40289	6.43993	7.8777	10.9433	13.8446	17.3335	23.7643	30.6525	38.4139	62.5482	176.695
0.155824	0.314438	0.468282	0.595475	0.762514	0.879265	1.01335	1.15337	1.28542	1.46698	1.64336	1.83614	2.03735	2.29316	2.58033	2.94263	3.58318	4.39249	5.40355	6.45785	8.05468	11.1939	13.9407	17.4035	24.0018	30.6562	38.4245	65.4484	178.295
0.1571	0.316685	0.468917	0.596209	0.766843	0.883146	1.01467	1.15466	1.29159	1.47969	1.64398	1.84342	2.04102	2.29419	2.61757	2.94376	3.60116	4.45137	5.52372	6.45967	8.10909	11.3384	14.1254	17.4867	24.1664	31.2363	38.4277	66.3484	187.33
0.158377	0.31674	0.469308	0.600085	0.767051	0.884279	1.01956	1.1551	1.29706	1.49323	1.64622	1.8454	2.04166	2.30545	2.62319	3.01416	3.6264	4.4519	5.5618	6.49314	8.21395	11.3505	14.1648	17.4929	24.3844	31.2561	38.734	66.397	188.209
0.158593	0.317002	0.470186	0.601699	0.767297	0.885227	1.02059	1.1733	1.30691	1.50176	1.64788	1.87419	2.05634	2.32164	2.63074	3.03048	3.70822	4.47636	5.62258	6.64909	8.54268	11.363	14.2386	17.8006	24.5777	31.2781	38.8555	66.9393	188.798
0.159037	0.317639	0.47121	0.602114	0.769324	0.886046	1.02272	1.17369	1.30695	1.51991	1.65085	1.87419	2.08112	2.33168	2.63801	3.05533	3.71918	4.56443	5.70243	6.65056	8.57854	11.4724	14.417	17.8889	25.0967	31.5181	38.8664	67.0355	192.458
0.159786	0.323068	0.471359	0.604971	0.771572	0.886529	1.02309	1.17885	1.31396	1.52352	1.66475	1.87721	2.08729	2.34321	2.63868	3.06985	3.7657	4.6072	5.74132	6.82655	8.79483	11.5529	14.4212	17.9401	25.1365	31.6161	39.1049	67.5433	204.182
0.16016	0.324247	0.471414	0.606837	0.772886	0.887304	1.02544	1.18244	1.31799	1.52694	1.67684	1.88566	2.09008	2.35311	2.6732	3.07852	3.84024	4.62259	5.74972	6.88668	8.87163	11.5968	14.5014	18.0113	25.2822	31.6812	39.1537	67.7894	206.631
0.160846	0.324916	0.476119	0.608681	0.773801	0.887304	1.02663	1.18633	1.32237	1.54511	1.69448	1.88575	2.09677	2.35566	2.6763	3.12137	3.86006	4.6263	5.76091	6.96058	9.17943	11.6811	14.5039	18.0969	25.2923	31.745	39.1962	67.8621
0.162147	0.328188	0.480456	0.611951	0.77552	0.888002	1.0268	1.18636	1.32776	1.54591	1.70028	1.90085	2.10263	2.36777	2.68203	3.1644	3.89603	4.70868	5.76616	6.96246	9.22441	11.7224	14.5757	18.164	25.3532	31.836	39.4594	71.3616
0.164002	0.32867	0.481145	0.616277	0.776763	0.891524	1.0291	1.1912	1.32842	1.55343	1.7056	1.91242	2.10703	2.37091	2.71001	3.16783	3.89613	4.77828	5.79236	7.03845	9.22653	11.7405	14.6834	18.1682	25.387	32.0313	39.6022	71.6443
0.165612	0.329311	0.481586	0.620071	0.77687	0.892698	1.0331	1.19933	1.33802	1.55356	1.7061	1.91571	2.10813	2.37533	2.73759	3.18908	3.90843	4.93768	5.80543	7.0602	9.27679	11.7504	14.7219	18.2402	25.5365	32.1649	40.1045	71.7516
0.165731	0.330165	0.4821	0.622373	0.778217	0.901531	1.03679	1.20036	1.3404	1.55373	1.70651	1.92205	2.11641	2.37685	2.74125	3.19544	3.96296	4.98091	5.82985	7.10269	9.28658	11.7916	14.7677	18.523	25.5488	32.279	40.3757	72.7622
0.165866	0.330774	0.482919	0.624272	0.778217	0.906138	1.03806	1.20316	1.34167	1.5546	1.72244	1.92205	2.11698	2.37991	2.75173	3.2018	3.99868	4.99279	5.94712	7.14254	9.59947	11.833	14.8606	18.5521	25.6658	32.3955	40.6307	73.0782
0.166229	0.331062	0.485974	0.632093	0.778217	0.908312	1.0393	1.20364	1.3473	1.5641	1.74215	1.92205	2.1381	2.38876	2.75785	3.20564	4.00612	5.00032	5.97821	7.15367	9.62601	11.833	15.0172	18.6918	25.7631	32.4255	41.0335	73.14
0.166637	0.331909	0.486865	0.634892	0.779052	0.909724	1.04107	1.20875	1.352	1.56818	1.7462	1.92205	2.14213	2.39812	2.78454	3.2278	4.02237	5.06738	6.00202	7.18745	9.70184	11.9476	15.1389	18.6977	25.8846	32.5981	41.2369	73.8284
0.167973	0.331928	0.486872	0.635726	0.781242	0.913225	1.04147	1.20939	1.35754	1.57355	1.7473	1.93746	2.15915	2.39978	2.79656	3.34724	4.05227	5.09701	6.01902	7.26574	9.71389	11.9907	15.1746	18.7198	26.0232	32.6067	41.7818	73.8548
0.168025	0.332109	0.487068	0.640222	0.784393	0.913722	1.04409	1.21064	1.35891	1.57577	1.74909	1.95111	2.18149	2.4286	2.79872	3.40441	4.12436	5.17267	6.05059	7.27512	9.73296	12.008	15.2023	18.8933	26.067	32.6258	43.0848	74.242
0.170713	0.332331	0.487525	0.640509	0.784563	0.926354	1.04539	1.22628	1.37674	1.58313	1.78295	1.96875	2.19803	2.43662	2.81876	3.44546	4.12528	5.21463	6.15234	7.32971	9.73869	12.0158	15.2049	19.0178	26.4125	32.6283	43.1674	74.3338
0.171167	0.332969	0.492188	0.644783	0.786684	0.931511	1.05334	1.22967	1.38716	1.58421	1.79008	1.98003	2.23961	2.44193	2.83576	3.47881	4.17077	5.2491	6.26846	7.40082	9.89783	12.1412	15.4726	19.485	26.5101	32.6422	43.1682	74.3696
0.171293	0.333477	0.492188	0.64493	0.791667	0.93159	1.05579	1.23047	1.39212	1.59829	1.79023	1.99278	2.24183	2.44604	2.83824	3.48029	4.24748	5.26088	6.30788	7.40329	9.92036	12.2009	15.5618	19.5207	26.6019	32.652	43.7309	74.6588
0.171489	0.335429	0.495663	0.646678	0.806578	0.934417	1.0676	1.23047	1.3965	1.6072	1.79418	2.0027	2.26887	2.45308	2.84836	3.48029	4.24824	5.28449	6.32132	7.56156	9.99076	12.2257	15.6041	19.5394	26.8177	32.9026	43.9934	76.1003
0.171534	0.34159	0.495828	0.650609	0.816364	0.939466	1.07227	1.24107	1.39818	1.60834	1.79687	2.00331	2.26911	2.45924	2.86992	3.52769	4.29084	5.29652	6.36704	7.7468	10.1884	12.2704	15.6219	19.7413	26.9728	33.0478	44.2058	76.4264
0.172038	0.342286	0.496094	0.652446	0.818318	0.946798	1.07564	1.25484	1.40596	1.62389	1.7978	2.01018	2.27758	2.47321	2.88045	3.54612	4.29982	5.31077	6.40794	7.76264	10.3624	12.3047	15.698	19.9235	27.0142	33.4523	44.6351	77.489
0.172483	0.344128	0.498144	0.652448	0.81919	0.950099	1.08106	1.27559	1.40959	1.6286	1.80113	2.02385	2.28321	2.48044	2.88753	3.57234	4.30609	5.33973	6.44089	7.83166	10.4199	12.3347	15.7314	19.9397	27.1151	33.5478	45.315	77.5529
0.172551	0.345769	0.499016	0.659992	0.8237	0.954849	1.08314	1.27793	1.41091	1.63284	1.80814	2.02962	2.28615	2.4875	2.88782	3.61084	4.33884	5.38417	6.50064	7.87884	10.4438	12.4755	15.8191	19.9405	27.1771	33.6923	45.8343	77.6803
0.172607	0.347762	0.499265	0.662018	0.826364	0.958575	1.08567	1.28396	1.4119	1.63942	1.8089	2.03041	2.28723	2.50518	2.90742	3.61278	4.36079	5.49363	6.52227	7.9346	10.4467	12.5339	15.8408	20.0015	27.2592	33.7338	46.0065	78.1145
0.173075	0.348029	0.500113	0.664468	0.830072	0.961649	1.09024	1.28432	1.41346	1.64877	1.82096	2.03108	2.29704	2.52212	2.95141	3.6143	4.44508	5.49502	6.53887	8.09946	10.676	12.6137	15.9243	20.2365	27.4404	33.813	46.5163	78.235
0.173232	0.348029	0.500424	0.667384	0.830194	0.962575	1.09071	1.2844	1.42554	1.65085	1.83971	2.03216	2.31793	2.52423	2.95312	3.72687	4.50686	5.5587	6.59855	8.11241	10.7251	12.6423	15.9448	20.5893	27.447	34.0906	46.5542	78.3282
0.173421	0.348029	0.500655	0.670383	0.831526	0.964585	1.09582	1.28938	1.42802	1.65085	1.85102	2.03357	2.3574	2.54985	2.95758	3.76451	4.55814	5.5889	6.65391	8.2689	10.8978	12.752	16.0303	20.6851	27.5057	34.3175	46.7574	78.3388
0.174157	0.348029	0.503075	0.677533	0.843002	0.965599	1.09874	1.29487	1.43258	1.66194	1.85962	2.04175	2.3577	2.56613	2.96336	3.76451	4.62507	5.66016	6.65978	8.3997	10.9228	12.8649	16.049	20.7494	27.5125	34.922	46.9544	79.7359
0.174529	0.348029	0.504154	0.681385	0.843391	0.966219	1.10056	1.30044	1.43496	1.66353	1.86873	2.05252	2.38727	2.56767	2.97868	3.8143	4.6312	5.71048	6.69447	8.51474	10.9283	13.1607	16.1199	21.3691	27.5447	34.9781	47.2686	80.7443
0.175536	0.348029	0.506741	0.685306	0.844984	0.966981	1.10056	1.30072	1.43496	1.66495	1.87411	2.05676	2.39367	2.57932	3.00687	3.8204	4.64057	5.76976	6.78889	8.56038	10.9311	13.2838	16.1883	21.5029	27.6951	35.0272	47.5143	80.9977
0.176424	0.348029	0.50808	0.689051	0.846644	0.96905	1.10056	1.30118	1.43496	1.66606	1.89111	2.07441	2.39385	2.60095	3.03803	3.84411	4.71651	5.82446	6.85345	8.56823	10.9393	13.3887	16.3333	21.5191	27.8967	35.0739	48.2397	81.2472
0.177917	0.348029	0.510587	0.689673	0.847327	0.970033	1.10188	1.3018	1.43613	1.67237	1.89286	2.07508	2.41402	2.62646	3.04982	3.85746	4.73269	5.83403	6.96493	8.60193	11.0266	13.3935	16.5198	21.7838	28.0372	35.7419	48.9126	81.778
0.177975	0.348389	0.511856	0.690475	0.848121	0.972488	1.10407	1.30248	1.43738	1.68154	1.90239	2.08034	2.41553	2.63818	3.07485	3.87767	4.73371	5.84958	6.97951	8.67743	11.1165	13.4789	16.5524	21.8178	28.0739	35.7448	50.0918	81.9921
0.178086	0.348965	0.512029	0.69354	0.848434	0.972912	1.10578	1.30385	1.44122	1.68973	1.90743	2.082	2.41746	2.63894	3.09821	3.88363	4.75277	5.84958	6.99609	8.7672	11.1313	13.6132	16.5566	21.823	28.2422	35.9058	50.2534	82.0585
0.180224	0.349214	0.513079	0.693581	0.848779	0.973932	1.10627	1.30409	1.44355	1.69818	1.91076	2.08387	2.42326	2.64473	3.14797	3.8853	4.88482	5.87533	7.10314	8.8217	11.1424	13.6738	16.5994	21.8409	28.3778	35.9788	50.7116	82.1799
0.180756	0.350791	0.516186	0.695584	0.849352	0.976124	1.1116	1.31877	1.44793	1.71062	1.91424	2.09272	2.43306	2.64967	3.16067	3.98372	5.01935	5.90693	7.11067	8.91389	11.1424	13.9355	16.6479	21.8983	28.4127	36.0127	50.823	82.2447
0.181172	0.350791	0.516616	0.696058	0.850799	0.977804	1.11262	1.32467	1.44983	1.72175	1.92205	2.09611	2.43755	2.66748	3.17846	3.98416	5.04764	5.9165	7.23783	9.0253	11.1939	13.9909	16.7639	21.9507	28.5071	36.0582	51.1792	82.3249
0.181998	0.350791	0.520913	0.700515	0.851168	0.980556	1.11878	1.32526	1.4527	1.72245	1.93073	2.10806	2.44228	2.67539	3.18451	4.00155	5.10744	5.94395	7.28617	9.05545	11.2273	14.0098	16.839	22.1703	28.6224	36.0929	51.2924	82.3929
0.182438	0.351218	0.521164	0.701527	0.853073	0.983094	1.1288	1.32526	1.46048	1.72864	1.93941	2.13861	2.44545	2.69114	3.19922	4.00612	5.16045	5.94524	7.34168	9.17661	11.3123	14.0468	16.945	22.4181	29.0217	36.3336	51.8345	82.7864
0.182999	0.3517	0.522228	0.703646	0.858447	0.984375	1.13155	1.32543	1.46557	1.74015	1.94151	2.21484	2.46094	2.6981	3.2833	4.0472	5.1979	5.98327	7.412	9.29339	11.3993	14.0618	17.0507	22.4472	29.0663	36.3488	51.9963	83.046
0.183443	0.354703	0.522989	0.70372	0.867172	0.985349	1.13243	1.32715	1.47567	1.74079	1.94917	2.22847	2.47321	2.70082	3.3024	4.04762	5.23628	6.01208	7.41963	9.36451	11.4398	14.0635	17.2353	22.5805	29.1676	36.5445	52.1355	83.1141
0.183815	0.356086	0.525037	0.704377	0.867954	0.992299	1.13537	1.33431	1.49173	1.7481	1.95166	2.233	2.48065	2.71001	3.34724	4.13008	5.24818	6.11284	7.50081	9.40148	11.4627	14.0663	17.2514	22.6887	29.2628	36.5762	52.3193	83.1469
0.18431	0.356513	0.526992	0.710407	0.870943	0.994087	1.13779	1.33514	1.49452	1.75627	1.95527	2.25018	2.48225	2.71824	3.36028	4.1346	5.26664	6.22953	7.55609	9.40589	11.4639	14.0735	17.3707	23.5598	29.2825	36.6119	52.6301	83.5056
0.184339	0.358398	0.527119	0.713611	0.875027	0.999013	1.14676	1.33532	1.50725	1.75642	1.95645	2.25035	2.49189	2.73232	3.48029	4.155	5.28502	6.27418	7.66455	9.49077	11.4718	14.1011	17.4306	23.6449	29.2862	36.6277	52.9965	83.9887
0.184529	0.35921	0.533307	0.71637	0.87508	1.00513	1.14695	1.34082	1.51789	1.75813	1.97454	2.25352	2.49195	2.76359	3.5032	4.16743	5.30102	6.27418	7.81567	9.55287	11.5284	14.1729	17.5826	23.6557	29.4383	37.1549	53.1761	84.4801
0.184534	0.360917	0.537037	0.720175	0.880523	1.00519	1.15257	1.34086	1.5371	1.76023	1.9903	2.25499	2.49419	2.76853	3.5265	4.19083	5.31243	6.33377	7.91579	9.57238	11.6149	14.199	17.5837	23.6758	29.5503	37.1692	53.2687	84.9922
0.184669	0.361386	0.537571	0.724568	0.881313	1.01033	1.15392	1.34281	1.53849	1.76189	2.01013	2.25975	2.51927	2.79294	3.55924	4.19287	5.34306	6.39603	7.91877	9.78197	11.7405	14.2968	17.6185	23.8354	29.8124	37.2607	53.3578	85.1314
0.186838	0.362166	0.538005	0.7268	0.881647	1.0115	1.15535	1.34607	1.54545	1.77663	2.03365	2.26117	2.52633	2.81406	3.56608	4.22603	5.37105	6.43254	7.97055	9.8499	11.7552	14.3647	17.6345	23.9211	29.8275	37.3118	53.4117	85.5608
0.18696	0.363014	0.53855	0.728528	0.882523	1.01193	1.15541	1.34747	1.55643	1.79159	2.03618	2.26887	2.5316	2.82352	3.58262	4.36082	5.50454	6.49706	8.12961	9.855	11.7857	14.4021	17.6625	23.9788	29.9049	37.48	53.5476	85.7346
0.186984	0.365667	0.541304	0.731161	0.88389	1.01203	1.1617	1.35594	1.57027	1.79159	2.03901	2.29605	2.53877	2.84658	3.58318	4.38952	5.62656	6.53887	8.14907	9.89363	11.7945	14.4356	17.7205	24.2757	29.92	37.5061	53.752	85.8522
0.188212	0.367054	0.541588	0.731511	0.887304	1.01467	1.16392	1.35823	1.57031	1.79666	2.04245	2.29811	2.54928	2.85151	3.61439	4.43346	5.68152	6.61326	8.23614	9.89897	11.817	14.4576	17.8888	24.4774	30.2205	37.7687	54.0383	87.6322
0.188396	0.367789	0.541704	0.733019	0.887304	1.01467	1.16432	1.36066	1.5711	1.81016	2.0499	2.30772	2.55599	2.85272	3.6247	4.43652	5.70113	6.61485	8.24619	9.95954	11.8534	14.4976	17.9968	24.5664	30.3125	37.7814	54.3338	88.1294
0.189582	0.367871	0.542488	0.737967	0.887304	1.01467	1.1697	1.36142	1.5741	1.81406	2.05565	2.32164	2.556	2.8603	3.62979	4.46116	5.72969	6.65081	8.26581	9.98723	11.855	14.6993	18.1511	24.7227	30.4711	37.8068	54.6467	89.4354
0.189802	0.371037	0.543683	0.738281	0.887304	1.01467	1.17264	1.366	1.57926	1.81531	2.07427	2.33216	2.55933	2.88045	3.64187	4.46126	5.74512	6.65603	8.30179	10.0417	11.8821	14.8847	18.1977	24.7294	30.4768	37.8115	54.7264	89.5892
0.191736	0.374443	0.544834	0.738281	0.888842	1.01828	1.17378	1.36714	1.57943	1.82695	2.08753	2.3377	2.56555	2.90815	3.67085	4.49079	5.74891	6.67382	8.30179	10.2029	11.89	14.8906	18.2969	24.9399	30.5197	37.818	54.8203	89.7271
0.193919	0.374635	0.548407	0.73829	0.891595	1.02145	1.18547	1.36805	1.58733	1.82799	2.0945	2.35083	2.56929	2.91016	3.69347	4.49544	5.82773	6.698	8.47506	10.2314	11.9146	15.0858	18.3556	24.9867	30.6421	37.818	54.9313	89.7657
0.194198	0.375421	0.548706	0.741353	0.893717	1.02617	1.18843	1.36993	1.59138	1.83274	2.09773	2.35961	2.56929	2.94511	3.71691	4.71866	5.83403	6.75816	8.4768	10.2683	12.045	15.0887	18.6918	25.0654	30.7577	37.9854	55.2894	90.1096
0.195132	0.375537	0.549052	0.741411	0.894346	1.03099	1.19774	1.37111	1.59254	1.83482	2.10878	2.3609	2.5758	2.95758	3.71803	4.72905	5.84191	6.78247	8.60266	10.2754	12.0519	15.1671	18.8077	25.4831	30.7635	38.0805	56.0439	90.2131
0.195149	0.37583	0.550282	0.743014	0.897559	1.03461	1.19856	1.37421	1.5931	1.83676	2.11698	2.36543	2.59841	2.96336	3.74857	4.75286	5.84958	6.81789	8.63106	10.3002	12.2531	15.206	18.8315	25.5007	30.8412	38.1223	56.1932	93.6163
0.19698	0.377476	0.550282	0.745151	0.898708	1.03512	1.20431	1.37438	1.61335	1.83799	2.12187	2.37034	2.6243	3.04401	3.75792	4.80158	5.88586	6.82751	8.70073	10.3306	12.2603	15.2121	19.0855	25.5488	31.2781	38.1376	56.3444	95.4353
0.197903	0.377522	0.550282	0.746849	0.898771	1.03695	1.20609	1.37671	1.62466	1.84021	2.1346	2.38507	2.63367	3.06239	3.76451	4.83566	5.90182	6.85538	8.73893	10.3777	12.3071	15.2274	19.3373	25.9199	31.3483	38.3339	56.3736	97.9468
0.198636	0.379248	0.550282	0.750877	0.901923	1.04171	1.21138	1.37833	1.63305	1.84067	2.14808	2.39695	2.65051	3.07739	3.77881	4.8454	5.92743	6.92419	8.73916	10.4043	12.3223	15.3126	19.347	26.0092	31.3855	38.399	57.1627	100.446
0.199201	0.381517	0.550282	0.753457	0.90507	1.04269	1.23034	1.38495	1.63674	1.84199	2.16138	2.40427	2.67464	3.07868	3.7791	4.91855	6.03881	6.94622	8.91278	10.4077	12.3404	15.3579	19.3772	26.1193	31.5059	38.9031	57.2272	101.81
0.199423	0.382449	0.550282	0.757271	0.907516	1.0434	1.23047	1.38614	1.64067	1.8493	2.17438	2.41048	2.6941	3.08116	3.8204	4.93207	6.05311	7.10486	8.92178	10.5392	12.3755	15.384	19.4417	26.2285	31.5094	39.0391	57.7204	101.857
0.200573	0.383304	0.550282	0.757659	0.910364	1.04442	1.23047	1.39071	1.65073	1.86076	2.17912	2.41179	2.69818	3.08355	3.84497	4.98393	6.05811	7.12178	8.92344	10.5849	12.6182	15.4348	19.5017	26.2468	31.5837	39.1537	57.8487	102.634
0.200705	0.385797	0.551545	0.759204	0.915027	1.04471	1.23344	1.40972	1.65085	1.87419	2.19108	2.41634	2.7042	3.11114	3.87071	5.0279	6.08802	7.21673	8.97107	10.6187	12.7779	15.5532	19.7013	26.3502	31.6371	39.2622	58.2406	103.009
0.200711	0.386685	0.554366	0.767815	0.916191	1.04875	1.23774	1.41419	1.65523	1.88039	2.19906	2.41711	2.71504	3.12522	3.8747	5.0596	6.09133	7.38333	9.10092	10.7213	12.9619	15.6016	19.8483	26.5071	31.8575	39.3273	58.2989	103.848
0.200797	0.387284	0.55465	0.76806	0.917896	1.05139	1.24023	1.42309	1.66369	1.88333	2.19997	2.41854	2.73877	3.15154	3.89108	5.07335	6.10045	7.40862	9.11713	10.7945	13.2434	15.7412	20.0695	26.5093	31.8834	39.3685	59.169	104.473
0.201139	0.388955	0.55465	0.76837	0.918264	1.05221	1.24029	1.43051	1.68056	1.89122	2.20113	2.41945	2.74246	3.16983	3.8992	5.08022	6.10115	7.56084	9.1522	10.8644	13.2926	15.9344	20.083	26.6643	31.9248	39.4967	59.2371	104.932
0.201199	0.390352	0.555108	0.769308	0.92523	1.05411	1.25484	1.43496	1.70595	1.8962	2.21484	2.4201	2.74314	3.2079	3.90526	5.08253	6.11035	7.6408	9.2117	10.874	13.3429	16.0128	20.1147	26.8344	32.1596	39.5115	59.8757	105.013
0.201847	0.39147	0.556125	0.770288	0.925598	1.05654	1.25551	1.43867	1.70882	1.89983	2.21993	2.4531	2.77892	3.20867	3.95562	5.22044	6.15723	7.73394	9.25764	10.9125	13.3524	16.1552	20.2291	26.8486	32.4728	39.5666	60.0454	105.172
0.202162	0.392247	0.556552	0.772165	0.928723	1.05711	1.26078	1.43952	1.70916	1.90811	2.22847	2.46094	2.78261	3.22711	3.99578	5.22219	6.15726	7.77741	9.26372	10.9228	13.3935	16.2528	20.2692	26.9852	32.4778	39.6405	60.5661	106.213
0.202509	0.393065	0.563376	0.772275	0.929052	1.06826	1.26449	1.44014	1.71653	1.91984	2.22847	2.46094	2.79429	3.22875	4.00612	5.26243	6.20862	7.80254	9.31663	10.9414	13.4267	16.3333	20.4495	27.0132	32.5048	39.6807	61.168	106.675
0.202958	0.393229	0.565634	0.772868	0.933867	1.07303	1.28921	1.45983	1.71677	1.92098	2.23587	2.46298	2.8059	3.24032	4.00966	5.26571	6.22573	7.82666	9.36186	11.0742	13.6468	16.5409	20.6851	27.0562	33.0441	39.8793	61.3371	107.209
0.204215	0.393522	0.569293	0.774943	0.934686	1.07561	1.29154	1.46322	1.72733	1.92763	2.25787	2.47261	2.85033	3.24432	4.04374	5.28251	6.22998	7.87525	9.36514	11.0872	13.6975	16.5933	20.7064	27.1558	33.1729	40.0763	61.5692	107.324
0.204678	0.393681	0.574935	0.778217	0.936211	1.07624	1.29729	1.46373	1.74015	1.93146	2.26191	2.47321	2.86867	3.26406	4.0499	5.32382	6.28865	7.87571	9.37685	11.1179	13.7255	16.6186	20.7583	27.1875	33.1994	40.5376	62.9044	109.399
0.204904	0.39592	0.576586	0.778217	0.941191	1.08136	1.3028	1.47656	1.74808	1.95049	2.26426	2.48029	2.88795	3.27389	4.09945	5.35281	6.3618	7.89037	9.39679	11.1858	13.8077	16.6574	21.5057	27.2649	33.2837	40.6838	62.9663	109.506
0.206409	0.395969	0.576741	0.778217	0.944348	1.08284	1.30731	1.48339	1.75403	1.95196	2.2663	2.48068	2.89922	3.2833	4.11188	5.35772	6.38345	7.90539	9.43341	11.1858	13.8232	16.6832	21.6712	27.3668	33.3833	40.8003	63.012	110.831
0.206471	0.396012	0.581215	0.778667	0.947775	1.08566	1.31503	1.48962	1.75901	1.96875	2.26887	2.48494	2.92516	3.29714	4.17635	5.39424	6.4188	7.92179	9.44544	11.2365	13.9782	16.7332	21.7282	27.631	33.4655	40.9297	63.304	111.696
0.206674	0.396089	0.582489	0.778899	0.949318	1.08847	1.31675	1.49591	1.76089	1.97224	2.26887	2.53082	2.93372	3.30167	4.18359	5.40386	6.45634	7.93593	9.48059	11.2574	14.0213	16.7339	21.7561	27.6847	33.7333	41.9282	63.488	112.602
0.206798	0.398262	0.584557	0.780092	0.951181	1.09233	1.31839	1.50202	1.76176	1.98315	2.26887	2.54959	2.95312	3.3366	4.21448	5.46442	6.48639	8.00467	9.49213	11.3203	14.0549	16.7862	21.9785	27.8909	33.8109	41.9386	63.5132	112.841
0.208167	0.399648	0.585626	0.780595	0.951954	1.10201	1.32526	1.50231	1.76186	1.98407	2.26887	2.56929	2.95312	3.42909	4.22391	5.50264	6.49706	8.01223	9.50572	11.331	14.1309	16.794	22.0087	27.8917	33.8395	42.2484	63.8769	113.122
0.210681	0.399768	0.587814	0.784393	0.958484	1.10562	1.32526	1.50337	1.77015	1.98407	2.28025	2.56987	2.95758	3.48032	4.27013	5.50282	6.52083	8.07314	9.56838	11.3311	14.1391	16.8228	22.0178	28.0378	33.8972	42.3107	64.4105	113.571
0.211711	0.401146	0.588789	0.784393	0.961597	1.11145	1.32906	1.52045	1.77624	1.98407	2.28123	2.65083	2.97526	3.49131	4.28875	5.50987	6.54432	8.16454	9.65636	11.4116	14.2204	16.8451	22.0542	28.0971	33.9832	42.3933	65.1661	113.849
0.211876	0.401442	0.589893	0.787455	0.961649	1.12631	1.35213	1.52324	1.77926	1.99237	2.2926	2.65927	2.97597	3.50829	4.29321	5.53328	6.61255	8.17757	9.73757	11.4709	14.2233	16.9067	22.0676	28.1759	34.0368	42.4082	65.3593	114.793
0.212337	0.402646	0.589943	0.792224	0.964272	1.13413	1.36449	1.5345	1.79405	2.00291	2.29546	2.66104	2.98309	3.52389	4.29784	5.55213	6.6244	8.23051	9.8123	11.4718	14.2416	16.9144	22.1826	28.1821	34.1228	43.0101	67.8679	115.337
0.21234	0.40423	0.591171	0.794137	0.966033	1.14169	1.37125	1.53608	1.79762	2.05043	2.32529	2.66191	3.02466	3.55092	4.31703	5.58414	6.64302	8.3114	9.88103	11.569	14.2614	16.9769	22.2446	28.2096	34.1459	43.211	67.9156	115.362
0.212758	0.405654	0.591482	0.797035	0.966727	1.14837	1.37158	1.53967	1.8252	2.05851	2.33261	2.66246	3.04401	3.58318	4.41325	5.61483	6.69354	8.36719	9.98557	11.6118	14.2671	16.9911	22.2902	28.2801	34.3864	43.3209	69.3277	115.784
0.214317	0.406533	0.592853	0.798687	0.96691	1.14927	1.37293	1.54687	1.83229	2.06101	2.33465	2.69504	3.04401	3.6807	4.42033	5.66054	6.77465	8.48008	10.0928	11.6707	14.4084	17.0022	22.3742	28.2875	34.4907	43.4169	69.4965	116.835
0.216591	0.408421	0.593604	0.798716	0.97092	1.15552	1.37976	1.55285	1.85421	2.0681	2.33465	2.71819	3.04525	3.68744	4.42382	5.68152	6.85954	8.5178	10.0988	11.6739	14.425	17.3107	22.381	28.3968	34.5783	44.6424	70.1499	116.969
0.217554	0.408633	0.596495	0.800153	0.971665	1.16285	1.38122	1.55884	1.86461	2.10263	2.34915	2.72291	3.07685	3.69141	4.49063	5.76616	6.92012	8.5359	10.1168	11.7278	14.481	17.3541	22.41	28.4076	34.6744	44.7633	70.3845	117.17
0.217666	0.410062	0.59811	0.8012	0.979394	1.17574	1.38897	1.56806	1.86677	2.10925	2.34927	2.72747	3.08713	3.73774	4.49079	5.79779	6.95757	8.54669	10.1342	11.8764	14.5003	17.3638	22.7049	28.4715	34.8722	44.9789	70.6488	118.414
0.219174	0.411019	0.601788	0.801301	0.979866	1.18015	1.39212	1.58304	1.8707	2.11235	2.35669	2.73559	3.11287	3.76451	4.49253	5.80294	6.99081	8.80943	10.1467	11.907	14.5848	17.4346	22.782	28.642	34.8937	45.0974	70.6628	118.676
0.219992	0.413606	0.603677	0.803077	0.984375	1.1836	1.39706	1.59549	1.87327	2.13868	2.38385	2.75627	3.12529	3.77532	4.53344	5.83174	7.00395	8.8217	10.1546	11.9385	14.5887	17.438	22.8688	28.7198	34.978	45.6258	71.227	119.676
0.220815	0.414692	0.60911	0.803433	0.988848	1.18466	1.40242	1.61141	1.88392	2.14122	2.39118	2.80173	3.15154	3.78564	4.53736	5.84958	7.03471	8.86279	10.2418	12.1128	14.6524	17.4693	23.0463	28.7498	35.0235	46.0103	71.3289	122.935
0.220829	0.417316	0.609238	0.804483	0.989879	1.19821	1.40308	1.61167	1.88725	2.14574	2.42374	2.8059	3.206	3.80631	4.53774	5.85057	7.06161	8.86514	10.2565	12.158	14.6666	17.4882	23.2596	28.7835	35.0831	46.154	71.4763	123.047
0.222539	0.418144	0.614032	0.806841	0.992188	1.19958	1.40345	1.61861	1.89048	2.16046	2.43316	2.82638	3.20739	3.81402	4.55976	5.9165	7.07575	9.01077	10.3037	12.2603	14.7709	17.7508	23.5665	28.9381	35.1179	46.3959	71.6506	124.822
0.223415	0.419879	0.614659	0.807057	0.992358	1.20164	1.41419	1.64103	1.89078	2.16094	2.4362	2.82817	3.22653	3.81643	4.62368	5.9703	7.07984	9.0152	10.3301	12.3053	14.7888	17.8888	23.7507	28.9795	35.1785	47.5598	71.7296	126.066
0.225142	0.420143	0.615444	0.809294	0.996582	1.21075	1.42503	1.65618	1.89405	2.16262	2.43861	2.82899	3.2833	3.85257	4.77054	5.98772	7.10269	9.0253	10.3389	12.4113	14.7941	17.8951	23.7781	29.0583	35.2603	47.7901	72.267	127.101
0.225699	0.421719	0.618938	0.81024	0.999909	1.21575	1.42572	1.66853	1.92205	2.16333	2.4559	2.85033	3.30195	3.96532	4.79977	5.98772	7.22214	9.14612	10.3389	12.5241	14.7984	17.9793	24.1448	29.1234	35.4384	47.8421	72.4574	127.965
0.22596	0.423164	0.620071	0.815746	1.00005	1.22532	1.4301	1.69604	1.9223	2.1648	2.46094	2.85254	3.33277	3.97577	4.83506	5.99277	7.2259	9.20057	10.3799	12.5893	14.8168	18.2707	24.2964	29.1336	35.4464	48.1213	72.6027	128.319
0.226055	0.424676	0.621881	0.818004	1.00085	1.22757	1.43164	1.70281	1.94039	2.17135	2.46094	2.86875	3.34379	3.97625	4.94642	6.05311	7.23878	9.39618	10.3843	12.5992	14.8407	18.3174	24.3286	29.1413	35.8469	48.428	72.7177	128.536
0.227958	0.425652	0.625008	0.819046	1.0067	1.23047	1.43496	1.71266	1.96875	2.17448	2.46867	2.89688	3.34444	3.97852	5.06918	6.08587	7.40356	9.42253	10.4874	12.6373	14.8485	18.3371	24.357	29.2035	35.9822	48.5163	72.9006	129.029
0.228911	0.425684	0.626351	0.822632	1.00697	1.23047	1.4371	1.72148	1.97754	2.17455	2.46921	2.914	3.35742	3.98577	5.1172	6.1329	7.44321	9.43856	10.5131	12.6846	14.8963	18.4455	24.4495	29.3389	35.9879	48.8107	73.7928	129.268
0.229903	0.426085	0.627093	0.826271	1.01467	1.23047	1.43734	1.72266	1.97888	2.18091	2.49183	2.91509	3.38146	3.9899	5.16788	6.172	7.48924	9.44125	10.5394	12.7043	14.9271	18.6208	24.4959	29.3798	36.1326	49.1601	74.0088	130.657
0.229971	0.426395	0.627197	0.830428	1.01467	1.23047	1.43818	1.72266	1.98062	2.18283	2.50967	2.91539	3.38466	3.99902	5.17382	6.20459	7.54678	9.44171	10.5612	12.7402	14.99	18.7646	24.7775	29.5354	36.2182	49.2931	74.2053	132.473
0.230523	0.432001	0.627534	0.83146	1.01467	1.23047	1.44263	1.72266	1.98407	2.1841	2.50967	2.92111	3.41811	3.99952	5.22829	6.22646	7.58698	9.4807	10.5849	12.7667	15.0434	18.8784	24.7859	29.7517	36.2609	49.4955	74.3364	133.9
0.233155	0.43204	0.629789	0.84027	1.01467	1.23419	1.45508	1.72266	1.98407	2.19989	2.54305	2.92663	3.43293	4.00347	5.23715	6.2783	7.67617	9.50572	10.6277	12.7969	15.0621	18.9256	24.8445	29.8715	36.524	49.7554	74.6051	152.504
0.234989	0.432262	0.631704	0.840658	1.02025	1.24023	1.45536	1.73485	1.98407	2.20141	2.55029	2.94142	3.44069	4.00612	5.26664	6.28865	7.68051	9.54154	10.6846	12.919	15.1448	19.2691	25.1799	29.913	36.6791	50.1321	74.819	152.642
0.235949	0.435924	0.633135	0.84649	1.02805	1.24228	1.46223	1.74015	1.98407	2.209	2.55836	2.9423	3.45409	4.05868	5.26664	6.31838	7.78217	9.56043	10.7843	12.9341	15.1739	19.3742	25.2813	29.9143	36.7669	50.5307	74.9811	153.54
0.236051	0.439215	0.633763	0.850376	1.03015	1.25067	1.46791	1.74788	1.98407	2.21484	2.56929	2.95777	3.47369	4.09582	5.36893	6.36801	7.78657	9.59989	10.7945	13.0187	15.2944	19.3874	25.3882	30.0245	36.8418	50.7434	75.0073	154.25
0.237545	0.440452	0.635502	0.852511	1.03184	1.26217	1.47613	1.75355	1.98877	2.21665	2.56929	2.97356	3.47683	4.0999	5.44752	6.39844	8.01223	9.66982	10.8309	13.0511	15.4566	19.5594	25.6236	30.0342	36.889	50.817	75.5483	155.348
0.240433	0.441161	0.63621	0.853946	1.03207	1.2648	1.47656	1.75511	1.99952	2.22335	2.57671	2.97719	3.48029	4.12377	5.44752	6.4321	8.03488	9.68271	10.9283	13.075	15.5319	19.85	25.6894	30.1291	37.2123	50.8516	75.8692	157.815
0.240558	0.442451	0.638006	0.858046	1.03324	1.26622	1.47656	1.75987	2.01649	2.22847	2.59234	2.99266	3.51301	4.22463	5.45162	6.44446	8.06869	9.70288	10.9876	13.0872	15.5351	19.9058	25.7186	30.1655	37.2693	50.9034	75.9529	163.005
0.241436	0.443869	0.638058	0.858516	1.03503	1.27594	1.47656	1.76176	2.02248	2.26044	2.62136	2.99386	3.51721	4.23396	5.46417	6.47132	8.08285	9.70837	10.9891	13.1294	15.5684	19.9397	25.758	30.4938	37.4062	51.1003	76.1162	167.494
0.243136	0.443908	0.644174	0.858584	1.04228	1.28576	1.49275	1.76444	2.02986	2.26386	2.63008	3.04175	3.52523	4.2759	5.48787	6.57268	8.09495	9.72829	11.0304	13.2045	15.6284	19.9601	25.796	30.5077	37.6394	51.584	76.8116	172.095
0.243748	0.450484	0.644677	0.86245	1.04325	1.29138	1.49693	1.76977	2.03162	2.26508	2.65051	3.04294	3.52641	4.35757	5.50282	6.64797	8.11736	9.73446	11.0605	13.2982	15.6446	19.9936	25.8254	30.5197	37.6716	51.5911	77.0572	172.326
0.244243	0.450701	0.64493	0.86466	1.04398	1.29269	1.50635	1.77036	2.03746	2.26887	2.65051	3.04401	3.58318	4.39655	5.54913	6.64909	8.15163	9.80677	11.08	13.3731	15.6831	20.0124	25.9648	30.6112	37.6964	51.8631	77.1503	174.051
0.244514	0.45212	0.645972	0.87073	1.04673	1.30439	1.51243	1.77636	2.05806	2.26887	2.65154	3.04401	3.58318	4.40869	5.56554	6.71221	8.1879	9.82292	11.1424	13.4884	15.79	20.0751	26.0685	30.7082	37.7294	51.9486	77.1876	175.384
0.246094	0.45393	0.649415	0.875271	1.05237	1.30496	1.52508	1.7804	2.08746	2.30612	2.65649	3.04568	3.62522	4.4328	5.59037	6.80653	8.30912	9.84683	11.323	13.591	15.8284	20.1224	26.1951	30.8627	37.7327	52.0242	77.4355	179.005
0.246094	0.45512	0.654493	0.878203	1.05407	1.30683	1.52634	1.78915	2.10263	2.32021	2.66348	3.04693	3.62622	4.49079	5.6196	6.86096	8.32183	9.90677	11.345	13.6611	15.8674	20.1441	26.2184	31.1563	37.7814	52.2501	77.5352	179.915
0.246094	0.456684	0.655349	0.881958	1.05457	1.3108	1.53257	1.79159	2.10925	2.32405	2.71819	3.07402	3.63699	4.54466	5.62258	6.86379	8.34518	9.95388	11.407	13.7722	15.9555	20.2481	26.2628	31.1675	37.7901	52.5075	77.5898	181.169
0.246094	0.458939	0.658077	0.884128	1.06055	1.3112	1.53334	1.79793	2.11471	2.32566	2.72747	3.10098	3.66779	4.55537	5.63434	6.86421	8.36166	10.0095	11.5089	13.7796	15.9771	20.2512	26.2671	31.2514	37.8729	52.5931	77.8884	182.259
0.246094	0.459258	0.659767	0.886447	1.06116	1.3114	1.53579	1.804	2.11698	2.33237	2.73649	3.10842	3.69141	4.62368	5.63464	6.88456	8.3751	10.0404	11.5352	13.8478	16.0699	20.3273	26.385	31.322	37.9764	52.7172	77.9138	184.648
0.246094	0.460601	0.663853	0.88714	1.06567	1.31398	1.55278	1.81136	2.12201	2.34687	2.73758	3.13226	3.6996	4.66322	5.64509	7.04705	8.3856	10.0417	11.5776	13.9212	16.0749	20.8484	26.4009	31.3323	38.0493	53.4483	78.028	188.209
0.246094	0.461978	0.66472	0.887304	1.06971	1.32377	1.55643	1.81925	2.12473	2.35654	2.74196	3.14457	3.70797	4.70516	5.66016	7.05462	8.58511	10.0988	11.6254	13.9597	16.1168	20.8588	26.7847	31.3716	38.2565	53.4924	79.013	198.854
0.246094	0.463071	0.664762	0.887304	1.07176	1.32431	1.55643	1.82071	2.13055	2.40069	2.75378	3.15994	3.75655	4.77961	5.68059	7.11909	8.79794	10.1168	11.6707	13.9962	16.2475	20.9881	26.7926	31.4366	38.2907	53.5993	79.0398	201.605
0.246094	0.463991	0.668208	0.887304	1.07501	1.32526	1.56531	1.82978	2.13106	2.4015	2.75667	3.22881	3.76567	4.79703	5.7081	7.18745	8.84188	10.1168	11.6815	14.0052	16.2649	21.0579	26.8005	31.4877	38.4277	53.8013	79.5344	203.622
0.246094	0.468318	0.674068	0.887304	1.07552	1.32839	1.5675	1.83905	2.1556	2.40813	2.763	3.23075	3.81759	4.83325	5.72399	7.18998	8.88881	10.2092	11.7362	14.0233	16.2692	21.6092	26.8568	31.6842	38.5961	54.2104	79.7587
0.246094	0.468771	0.67703	0.887304	1.07809	1.33589	1.57692	1.84535	2.15766	2.43316	2.78423	3.24187	3.82537	4.87241	5.76639	7.2329	8.91457	10.2565	11.7422	14.0941	16.2949	21.7005	26.9112	31.963	38.6737	54.2335	79.9324
0.246094	0.468983	0.681471	0.887704	1.09005	1.33647	1.59236	1.84545	2.16319	2.46094	2.78635	3.24664	3.85065	4.88482	5.88263	7.23594	8.9304	10.2686	11.7612	14.1048	16.379	21.7138	27.0624	32.0241	38.7885	54.4218	80.0497
0.246094	0.475798	0.683017	0.890955	1.09175	1.34312	1.59505	1.8542	2.18778	2.47321	2.79815	3.25629	3.86192	4.89038	5.94765	7.2506	8.93296	10.3506	11.8316	14.1101	16.3953	21.7787	27.1033	32.2636	38.8783	54.7413	80.3898
0.246094	0.47585	0.686804	0.891892	1.09422	1.34905	1.59653	1.87419	2.19868	2.49313	2.80397	3.2833	3.89471	4.89441	5.98772	7.30099	8.98759	10.3678	11.865	14.1286	16.6792	21.7923	27.1908	32.3261	38.8955	55.1217	80.4015
0.246094	0.476922	0.688688	0.894018	1.09562	1.35135	1.60218	1.88331	2.2	2.50817	2.8059	3.32304	3.90053	4.90338	6.05802	7.34509	9.0087	10.3827	11.8871	14.176	16.7422	21.804	27.2457	32.352	39.0601	55.3823	80.5174
0.246094	0.481211	0.693762	0.894346	1.10056	1.36043	1.61878	1.89003	2.2	2.50967	2.80958	3.34724	3.91809	4.93515	6.06785	7.39313	9.13144	10.4827	11.907	14.1896	16.817	21.9148	27.2626	32.3826	39.3618	55.393	80.6287
0.246094	0.481664	0.695623	0.895106	1.10056	1.36325	1.63064	1.89059	2.21447	2.50967	2.82324	3.34724	3.94807	4.95254	6.08802	7.40839	9.15247	10.4929	12.0611	14.2026	16.8228	22.0884	27.411	32.53	39.5466	55.509	80.7384
0.246573	0.482104	0.696058	0.901472	1.10338	1.38797	1.635	1.89934	2.21484	2.50967	2.86992	3.34889	3.96524	4.98251	6.12341	7.45351	9.15522	10.504	12.2072	14.2397	16.8414	22.1014	27.4426	32.5488	39.6473	55.5343	80.8481
0.246953	0.483254	0.696058	0.901927	1.10838	1.38896	1.63806	1.90667	2.21484	2.51194	2.88045	3.35146	3.96548	5.00608	6.2358	7.50086	9.26187	10.5054	12.2184	14.2787	16.9257	22.1162	27.5141	32.698	39.6891	55.9295	81.4864
0.247183	0.484217	0.696058	0.902554	1.10884	1.39212	1.64361	1.91638	2.22719	2.5178	2.88272	3.35177	3.97577	5.06738	6.25395	7.5915	9.30416	10.517	12.2207	14.2811	17.1367	22.2529	27.5709	32.7666	39.7751	56.2361	81.5195
0.247921	0.486695	0.696058	0.908201	1.1093	1.39212	1.64706	1.92205	2.22847	2.52318	2.8926	3.35224	4.00612	5.07335	6.30366	7.59181	9.31588	10.5333	12.3353	14.2958	17.4387	22.3945	27.7076	32.816	39.8499	56.3689	81.5214
0.248047	0.488528	0.700448	0.915607	1.11742	1.39663	1.65085	1.92358	2.22847	2.53464	2.89646	3.3596	4.00735	5.08692	6.3914	7.59805	9.35394	10.5935	12.3587	14.3164	17.5904	22.5218	27.7466	32.9465	39.8521	56.5079	81.6086
0.248047	0.489404	0.701327	0.919199	1.12036	1.40195	1.65085	1.93514	2.23025	2.56929	2.97356	3.36074	4.01695	5.12088	6.39363	7.61453	9.37137	10.5935	12.3642	14.3386	17.6445	22.5483	27.7529	33.0573	40.1621	56.806	81.6946
0.248047	0.491402	0.701583	0.924495	1.12391	1.40317	1.65085	1.94513	2.2381	2.56929	2.97448	3.36585	4.05868	5.16069	6.41734	7.63287	9.39671	10.6277	12.3647	14.3497	17.9041	22.8033	27.787	33.0799	40.3041	56.8098	81.852
0.248047	0.492188	0.701583	0.924972	1.1297	1.41035	1.68277	1.95656	2.2418	2.58159	2.98249	3.40949	4.07358	5.17382	6.4245	7.64653	9.44542	10.6533	12.4149	14.3605	17.9147	23.1094	27.8085	33.0999	40.3931	57.3055	82.2748
0.248047	0.492188	0.701583	0.928227	1.13162	1.41368	1.6853	1.96875	2.2443	2.58202	2.99102	3.41402	4.10656	5.17382	6.49325	7.70224	9.48367	10.6619	12.445	14.3938	17.9407	23.4084	27.8487	33.1207	40.4932	58.2089	82.3856
0.248047	0.492188	0.705424	0.929181	1.13269	1.41882	1.69095	1.96875	2.25185	2.59912	2.99323	3.4448	4.13412	5.21635	6.49729	7.78217	9.49616	10.6846	12.4634	14.463	17.9851	23.4689	27.8714	33.1751	40.8304	58.2209	82.3856
0.248047	0.492188	0.709211	0.934317	1.13736	1.41902	1.71074	1.96875	2.26887	2.61601	2.99386	3.44647	4.19083	5.23409	6.50172	7.79705	9.50572	10.7439	12.466	14.6183	17.9915	23.5253	28.1898	33.2058	41.1985	58.6839	82.6586
0.248047	0.492188	0.719193	0.935634	1.14344	1.42933	1.71214	1.97888	2.26939	2.64459	2.99386	3.45409	4.20814	5.24272	6.50623	7.86534	9.50572	10.803	12.4758	14.6425	18.0635	23.5319	28.2119	33.3384	41.504	58.9564	82.9073
0.248047	0.492586	0.719489	0.944444	1.14628	1.44041	1.71463	1.98094	2.27871	2.65051	3.01195	3.47653	4.23287	5.25067	6.51568	7.93167	9.56248	10.8057	12.4787	14.7609	18.086	23.6684	28.3794	33.3648	42.0298	59.1552	85.2592
0.248047	0.493291	0.72382	0.949903	1.14801	1.44226	1.72266	1.98407	2.28744	2.65051	3.01261	3.47928	4.23988	5.28003	6.5557	7.98145	9.57238	10.8281	12.611	14.7829	18.2142	23.6793	28.4649	33.6778	42.1897	59.2478	85.7156
0.248047	0.493665	0.724522	0.959396	1.15099	1.45791	1.72465	1.98407	2.30509	2.66191	3.04401	3.49774	4.25714	5.31859	6.56025	8.06919	9.61027	10.8632	12.7469	14.8168	18.2664	23.7597	28.5465	33.8022	42.2402	59.9429	86.6365
0.248047	0.493693	0.726664	0.960509	1.16182	1.4582	1.73449	1.98407	2.31407	2.66191	3.05903	3.49816	4.26577	5.32703	6.60339	8.07762	9.61528	10.8942	12.7684	14.9308	18.498	23.8572	28.559	34.039	42.6602	59.9682	87.7136
0.248047	0.496094	0.727765	0.961081	1.16222	1.45908	1.73566	1.98412	2.32404	2.66368	3.06183	3.51083	4.27196	5.39726	6.60393	8.17104	9.717	10.9545	12.8104	15.0594	18.5456	23.9437	28.6327	34.0846	42.7835	59.9833	88.5222
0.248047	0.496563	0.727979	0.961512	1.16905	1.46519	1.73765	1.98713	2.32743	2.66902	3.06367	3.5446	4.29784	5.41481	6.67475	8.18891	9.73309	10.9809	12.8432	15.0621	18.6467	23.9919	28.6992	34.1597	42.8098	60.6779	88.702
0.248047	0.497193	0.728943	0.964277	1.17004	1.46748	1.73918	2.02552	2.32953	2.68282	3.07238	3.58318	4.31596	5.44983	6.68962	8.19533	9.7353	10.9842	13.0314	15.0621	18.8395	23.9968	28.7841	34.3322	42.8502	60.8847	88.8974
0.248047	0.497395	0.729258	0.96835	1.17039	1.47656	1.74015	2.02934	2.33465	2.69382	3.08161	3.5935	4.43652	5.46877	6.69229	8.19851	9.73549	11.1369	13.0638	15.0842	18.8907	24.0241	28.7959	34.3395	42.8714	61.3741	90.2094
0.249065	0.497816	0.73051	0.974505	1.17777	1.47656	1.74205	2.03508	2.33832	2.69541	3.09031	3.61105	4.53774	5.49443	6.71273	8.30188	9.74384	11.206	13.0759	15.1026	19.0321	24.1046	28.8168	34.3474	43.0141	61.5531	90.5825
0.249421	0.498151	0.733343	0.978844	1.18574	1.47656	1.74409	2.03785	2.34867	2.70571	3.11287	3.61675	4.57454	5.56609	6.80304	8.34475	9.77498	11.2316	13.1263	15.1864	19.1466	24.1539	28.9164	34.4062	43.5288	62.0004	90.8266
0.249609	0.500078	0.733802	0.979933	1.20131	1.48494	1.76345	2.05489	2.35983	2.71649	3.12336	3.65845	4.57761	5.66016	6.95663	8.3997	9.78258	11.2922	13.1964	15.1922	19.1716	24.3278	28.9864	34.4513	43.5469	62.2301	91.0191
0.249862	0.5016	0.73687	0.981072	1.2051	1.48537	1.76691	2.06535	2.36595	2.71819	3.17675	3.69483	4.57824	5.7132	6.95759	8.44635	9.8499	11.323	13.2561	15.2712	19.1969	24.431	29.0171	34.5412	43.6024	62.2695	91.0337
0.250714	0.503395	0.738281	0.982514	1.2144	1.49693	1.76977	2.07278	2.36919	2.71819	3.18982	3.72165	4.62368	5.80251	6.97561	8.57478	9.85781	11.3364	13.2982	15.3759	19.2027	24.4328	29.0515	34.8295	43.8026	63.0173	92.1667
0.250982	0.503837	0.738281	0.984375	1.21578	1.49693	1.77129	2.08712	2.3859	2.7263	3.25232	3.74839	4.64972	5.83328	6.99963	8.58511	9.90504	11.3763	13.3096	15.3874	19.2202	24.4637	29.1379	35.0942	44.026	63.2365	95.0333
0.251043	0.505149	0.738281	0.989395	1.21962	1.51048	1.77461	2.09207	2.39555	2.72768	3.26013	3.76451	4.6693	5.84958	7.02598	8.60976	9.9771	11.4957	13.3306	15.61	19.225	24.6934	29.4188	35.2661	44.1732	63.4354	96.7383
0.251217	0.506903	0.73855	0.992197	1.23047	1.5112	1.77461	2.09351	2.39838	2.74657	3.26071	3.76941	4.68204	5.86353	7.07329	8.62318	9.98229	11.5664	13.4426	15.6107	19.2684	24.7115	29.4285	35.3621	44.7733	63.5213	97.0908
0.251537	0.507587	0.740582	0.992337	1.23047	1.51423	1.77636	2.10208	2.40054	2.74823	3.26255	3.7762	4.73371	5.90244	7.11683	8.62733	10.0206	11.5769	13.4549	15.6139	19.6239	24.8506	29.4479	35.6938	45.4116	63.622	99.0827
0.251754	0.510921	0.741222	0.99447	1.23047	1.51493	1.78318	2.10263	2.4077	2.75395	3.27541	3.78306	4.80311	5.9064	7.17781	8.65537	10.0447	11.6802	13.4624	15.6583	19.6847	24.8712	29.4931	35.7342	45.6083	64.5765	100.418
0.252116	0.512668	0.744141	0.994934	1.23047	1.51805	1.78602	2.10319	2.41169	2.78284	3.28679	3.8204	4.82387	5.93144	7.22428	8.70887	10.0894	11.7001	13.5185	15.6658	19.8449	24.9446	29.6231	36.0939	45.611	64.6557	100.689
0.253117	0.515033	0.744366	0.99503	1.23047	1.5219	1.78729	2.11698	2.41683	2.78423	3.28797	3.85265	4.8375	5.94712	7.24921	8.73609	10.1168	11.7644	13.5188	15.7922	19.8993	25.013	29.6839	36.1799	45.6575	65.0365	101.022
0.255586	0.515079	0.746046	0.995593	1.23047	1.53426	1.79664	2.11698	2.42374	2.8059	3.28828	3.85669	4.84748	6.08663	7.26706	8.76315	10.1258	11.8031	13.5338	15.8248	20.2395	25.1448	29.7377	36.2182	46.0294	65.2204	101.25
0.255669	0.519164	0.750501	0.996036	1.23105	1.55399	1.80553	2.1451	2.43446	2.80952	3.29501	3.90399	4.85415	6.15234	7.31339	8.77074	10.2286	11.8142	13.5398	16.115	20.3164	25.1687	29.7865	36.2385	46.2629	65.818	101.345
0.256547	0.519231	0.750931	0.997062	1.2314	1.55643	1.80948	2.15009	2.44084	2.81471	3.30572	3.94518	4.85606	6.19648	7.31702	8.79063	10.2358	11.8227	13.5896	16.214	20.3347	25.5975	29.9455	36.3537	46.3343	66.3819	101.481
0.256714	0.523513	0.751551	0.999268	1.23192	1.56384	1.82834	2.16022	2.44734	2.84729	3.34434	3.9542	4.8645	6.2306	7.33033	8.8876	10.2418	11.8309	13.5901	16.2441	20.3679	25.6468	30.0597	36.4393	46.9684	67.2134	101.534
0.259317	0.524678	0.753472	1.00485	1.23219	1.5675	1.84046	2.16439	2.46094	2.85993	3.34724	3.95981	4.90338	6.23364	7.37499	8.92586	10.2565	11.8381	13.5951	16.2534	20.4894	25.7788	30.0911	36.495	46.9942	68.0145	101.973
0.259497	0.52477	0.757455	1.01467	1.23478	1.56753	1.84095	2.18784	2.47452	2.87455	3.36106	3.95982	4.90753	6.25621	7.41963	8.92775	10.2683	11.8381	13.6636	16.2559	20.7353	25.8668	30.2462	36.6447	47.2239	68.6121	102.076
0.260129	0.527726	0.757977	1.01467	1.23754	1.56879	1.84293	2.20113	2.50195	2.88045	3.36372	3.99402	4.92566	6.2733	7.45456	8.97753	10.2939	11.8456	13.7215	16.261	20.7835	25.8773	30.3461	36.6636	47.5732	69.0933	102.352
0.261438	0.528666	0.761999	1.01467	1.23955	1.56891	1.86105	2.20195	2.50967	2.88045	3.37038	3.99892	4.92903	6.28973	7.49219	9.03536	10.3389	11.8534	13.7398	16.4059	20.8995	25.9997	30.4298	36.6771	47.7455	69.6286	103.348
0.262618	0.529293	0.770153	1.01467	1.24023	1.56905	1.87419	2.20555	2.50967	2.88045	3.39564	4.00612	4.94277	6.31635	7.58443	9.04074	10.3389	11.9597	13.7761	16.406	20.9239	26.0635	30.4381	36.6988	48.2854	69.8703	104.004
0.262834	0.531978	0.773959	1.01551	1.24679	1.57104	1.87856	2.21225	2.50967	2.88797	3.39571	4.05868	4.95254	6.39711	7.62832	9.10547	10.3889	11.9603	13.8823	16.5908	21.0675	26.1828	30.5816	36.7194	48.655	69.8945	104.409
0.263033	0.533445	0.778217	1.019	1.24868	1.57568	1.88072	2.22847	2.53369	2.89224	3.40661	4.07151	4.9942	6.40317	7.62891	9.11876	10.4324	12.0175	13.9212	16.6072	21.1931	26.2071	30.606	36.8678	48.7731	70.1829	104.886
0.263153	0.535963	0.778217	1.02015	1.24882	1.57577	1.88351	2.2399	2.5463	2.91982	3.41572	4.15139	5.11413	6.40746	7.64871	9.11899	10.4923	12.0611	13.9422	16.7483	21.3322	26.3121	30.6351	37.2124	48.8135	70.5826	105
0.263765	0.537276	0.778217	1.02035	1.25484	1.57577	1.92033	2.24715	2.56384	2.94204	3.46411	4.15744	5.17937	6.50667	7.66206	9.14529	10.4929	12.0696	13.9603	16.7886	21.374	26.5339	30.6476	37.283	48.9964	70.5846	105.015
0.2638	0.537367	0.778217	1.02224	1.25484	1.57578	1.94013	2.25008	2.56929	2.96138	3.46962	4.18165	5.19265	6.52689	7.68161	9.14803	10.5824	12.0812	14.1712	16.8273	21.4141	26.5592	30.6681	37.4724	49.0067	70.6122	105.384
0.264343	0.538007	0.778217	1.0234	1.25484	1.5849	1.94538	2.26194	2.56929	2.96415	3.48029	4.18359	5.23251	6.56396	7.7759	9.17391	10.6163	12.0812	14.1958	16.8416	21.5058	26.6214	30.7228	37.4875	49.0128	70.6389	106.56
0.264801	0.538413	0.778591	1.02452	1.25651	1.58561	1.94542	2.26556	2.58521	2.97356	3.49527	4.2084	5.25881	6.62629	7.86134	9.24736	10.6267	12.1062	14.198	16.9049	21.5387	26.7523	30.8011	37.5254	49.2291	70.8258	108.147
0.26497	0.539052	0.781377	1.02734	1.26106	1.59066	1.96134	2.26724	2.59703	2.98194	3.49953	4.22003	5.31795	6.62676	7.91924	9.3548	10.7167	12.1187	14.2841	16.9323	21.5966	26.7585	30.9614	37.6159	49.3226	70.8788	108.372
0.266685	0.540547	0.78282	1.02775	1.26248	1.60254	1.9775	2.26787	2.60462	2.98797	3.50767	4.23424	5.33486	6.64909	7.92483	9.36685	10.7213	12.2183	14.2961	16.9328	21.6181	26.7646	31.0671	37.6225	49.4348	70.9898	108.377
0.267068	0.541021	0.784185	1.02872	1.26566	1.60847	1.98382	2.26887	2.62066	2.99386	3.51368	4.40226	5.37477	6.65599	7.97635	9.37097	10.7391	12.231	14.3203	16.9381	21.6924	26.7736	31.1399	37.629	49.4869	71.0269	108.924
0.267691	0.542238	0.784393	1.02878	1.26988	1.60985	1.98407	2.26887	2.62816	3.01828	3.52353	4.40226	5.41406	6.65916	7.99732	9.38066	10.7586	12.307	14.3253	17.2079	21.8179	26.8164	31.1567	37.6844	49.719	71.1947	109.21
0.26879	0.542495	0.784463	1.03479	1.27917	1.62495	1.98407	2.28202	2.6286	3.03685	3.52572	4.40226	5.41965	6.65972	8.00039	9.43946	10.9294	12.3643	14.341	17.2506	21.9448	26.8293	31.1762	37.7692	49.8681	71.2941	109.399
0.270007	0.542606	0.784653	1.03547	1.28986	1.6269	1.98407	2.28435	2.63884	3.0625	3.53444	4.43149	5.48303	6.66274	8.08887	9.46209	11.0056	12.3697	14.3448	17.4196	21.9704	26.8361	31.283	37.7889	50.0109	71.4575	109.917
0.270588	0.544164	0.792026	1.03965	1.31934	1.62913	1.98676	2.29079	2.64862	3.08206	3.53465	4.43652	5.49015	6.67413	8.12308	9.47766	11.0149	12.4758	14.377	17.5418	22.1006	26.9091	31.3189	38.0669	50.1386	71.5171	110.696
0.270625	0.54484	0.793292	1.04074	1.31978	1.62965	1.98729	2.29392	2.65051	3.09128	3.58318	4.43817	5.49214	6.68714	8.13599	9.47902	11.1088	12.477	14.4547	17.6289	22.3816	26.9328	31.3682	38.1874	50.2843	71.5773	111.541
0.272974	0.546762	0.796535	1.04409	1.32084	1.65279	1.99077	2.29921	2.65336	3.12709	3.59141	4.45373	5.49525	6.69702	8.14715	9.51556	11.1424	12.5332	14.4813	17.8278	22.4221	26.9677	31.461	38.195	50.5362	71.587	111.624
0.27371	0.547219	0.807247	1.04409	1.32526	1.65355	1.99551	2.30128	2.66191	3.13027	3.60104	4.45695	5.55165	6.7096	8.14827	9.55188	11.1457	12.5565	14.547	17.9175	22.4598	27.0416	31.5043	38.3808	50.6463	71.6856	112.015
0.273769	0.548453	0.808131	1.04409	1.33006	1.6653	1.99782	2.30746	2.66489	3.13226	3.60296	4.49758	5.57933	6.74668	8.17086	9.55633	11.1611	12.5658	14.5835	17.9446	22.6007	27.0446	31.5045	38.4833	50.6989	72.0042	112.04
0.275549	0.549349	0.808592	1.0449	1.33231	1.66532	2.00721	2.32164	2.66815	3.13457	3.62231	4.50586	5.57933	6.76831	8.23692	9.64101	11.177	12.6033	14.6198	17.9514	22.6527	27.0979	31.5868	38.5915	50.8579	72.0298	112.129
0.277072	0.550282	0.812987	1.04678	1.34708	1.67888	2.014	2.34007	2.67377	3.13649	3.62437	4.53636	5.66016	6.83691	8.30179	9.66555	11.2074	12.611	14.7266	17.9675	22.6847	27.1277	31.8483	38.636	50.8717	72.344	112.45
0.278005	0.550282	0.818708	1.0504	1.34713	1.67912	2.01805	2.3402	2.68872	3.15593	3.64285	4.53774	5.6655	6.8844	8.31577	9.68559	11.2236	12.6254	14.7677	18.0065	22.8986	27.2074	32.1503	38.7025	51.611	72.3959	112.987
0.278255	0.550282	0.819405	1.05149	1.34762	1.68631	2.01813	2.36987	2.70117	3.18521	3.66005	4.55308	5.6907	6.96928	8.34077	9.69247	11.2847	12.6438	14.7701	18.2967	22.9662	27.2558	32.1984	38.7527	51.6785	72.4824	113.596
0.281139	0.550282	0.81985	1.05289	1.34776	1.68956	2.02072	2.38791	2.71334	3.19174	3.68024	4.60922	5.76198	6.99635	8.35995	9.70745	11.2935	12.7134	14.8062	18.3375	22.9871	27.3924	32.2064	38.8738	51.7117	72.5246	114.424
0.282745	0.550282	0.82236	1.05488	1.3516	1.69455	2.02934	2.40617	2.71895	3.20867	3.68328	4.61789	5.78988	6.99963	8.36073	9.71148	11.3203	12.7723	14.8923	18.3418	23.037	27.4502	32.2481	38.8769	52.04	72.7393	114.454
0.282803	0.550282	0.829026	1.08813	1.35584	1.69926	2.05128	2.4098	2.75141	3.20917	3.7147	4.67578	5.86971	7.01733	8.42032	9.76034	11.431	12.8107	14.8942	18.3489	23.0761	27.4687	32.2899	39.1379	52.2334	72.8491	114.48
0.283086	0.550282	0.832929	1.08909	1.35823	1.70862	2.05512	2.41711	2.77405	3.2179	3.74839	4.67578	5.9165	7.05135	8.42489	9.7975	11.4902	12.9193	14.9293	18.4027	23.0765	27.6327	32.4209	39.1409	52.5836	72.8604	114.915
0.283491	0.550282	0.834496	1.0905	1.36874	1.71072	2.0592	2.42374	2.78127	3.22203	3.76219	4.72872	5.93345	7.05905	8.47506	9.8079	11.569	12.9449	14.9327	18.4833	23.3359	27.6981	32.4265	39.2028	52.9355	73.0048	115.344
0.283688	0.550282	0.835522	1.094	1.36962	1.71266	2.06123	2.42374	2.78423	3.23414	3.7894	4.73371	5.93892	7.12361	8.49291	9.8499	11.6317	12.9457	14.9514	18.6069	23.3372	27.7137	32.4707	39.2422	53.3257	73.1616	116.556
0.283767	0.550282	0.835552	1.09666	1.37075	1.71831	2.06202	2.44298	2.79081	3.2748	3.85198	4.73371	5.94368	7.15367	8.50853	9.86792	11.6631	12.9481	14.9693	18.6122	23.3792	27.7773	32.4881	39.3292	53.4597	73.4702	117.138
0.286087	0.550282	0.837298	1.09762	1.37621	1.72466	2.07303	2.44363	2.80412	3.32436	3.8579	4.77828	6.03495	7.1748	8.56409	9.90677	11.7	12.9579	15.0283	18.7096	23.4338	27.8411	32.5103	39.3362	53.5422	73.533	117.367
0.28657	0.550282	0.841663	1.10056	1.38134	1.72897	2.08518	2.44438	2.80582	3.34526	3.89108	4.79606	6.03587	7.18677	8.57495	9.91722	11.7181	12.9744	15.1182	18.9492	23.5351	27.9733	32.6702	39.4156	53.8115	73.8056	117.986
0.286909	0.550282	0.845618	1.10056	1.38153	1.73002	2.08648	2.46094	2.8059	3.34724	3.89108	4.80698	6.10657	7.18757	8.61328	9.94782	11.7271	12.984	15.1372	19.006	23.5557	27.9947	32.887	39.586	53.8116	73.9371	120.592
0.287144	0.550282	0.845863	1.10056	1.38514	1.74119	2.08817	2.46094	2.8059	3.35433	3.89282	4.88225	6.12308	7.18981	8.61714	10.0231	11.7569	12.9993	15.1381	19.059	23.5698	27.9985	33.1697	39.7228	54.3215	73.983	121.541
0.287464	0.550282	0.84961	1.10056	1.38601	1.74537	2.08817	2.47081	2.8059	3.36045	3.89379	4.88675	6.14242	7.23605	8.63917	10.0406	11.7945	13.0621	15.2994	19.0951	23.7405	28.2299	33.1775	39.7746	54.4985	74.1335	121.988
0.287626	0.554604	0.8547	1.10056	1.39212	1.75517	2.0902	2.47321	2.82817	3.3708	3.92509	4.98486	6.15234	7.24537	8.70323	10.0538	11.8227	13.1443	15.3599	19.1149	23.7528	28.2436	33.279	39.8034	54.5315	74.2681	122.364
0.287769	0.55465	0.860873	1.10149	1.39734	1.7688	2.09428	2.47603	2.82829	3.37663	3.92715	4.98842	6.16402	7.28111	8.72158	10.0699	11.8319	13.1523	15.5235	19.2998	23.877	28.4336	33.4263	40.0444	54.6091	74.2897	122.644
0.288159	0.55465	0.862109	1.10492	1.39828	1.77061	2.10035	2.48233	2.83911	3.3767	3.9375	5.0153	6.1728	7.30338	8.72853	10.0898	11.865	13.1534	15.563	19.3114	23.9797	28.5588	33.4316	40.3263	54.8532	74.4998	123.522
0.288434	0.55465	0.864924	1.10506	1.40917	1.77241	2.10263	2.50193	2.84944	3.38913	3.94033	5.07335	6.20072	7.33695	8.74874	10.1258	11.879	13.2966	15.7133	19.4398	24.1799	28.6318	33.5672	40.5346	55.1075	74.7562	123.544
0.2888	0.55465	0.866538	1.10703	1.41218	1.77461	2.10263	2.50343	2.86992	3.3919	3.96814	5.12883	6.20948	7.34597	8.76315	10.1467	11.9249	13.2973	15.7238	19.5193	24.2385	28.7109	33.5817	40.5659	55.1272	75.059	123.844
0.289792	0.55465	0.866874	1.1093	1.41572	1.77461	2.10263	2.50967	2.86992	3.40198	3.97822	5.15955	6.22573	7.38195	8.76499	10.1973	11.9374	13.4564	15.7336	19.6459	24.4683	28.7315	33.5927	40.6347	55.5416	75.291	124.438
0.290481	0.55465	0.872259	1.1093	1.42676	1.77558	2.10475	2.50967	2.88046	3.40563	4.00612	5.17382	6.24302	7.38504	8.79355	10.21	12.0007	13.4903	15.911	19.6802	24.4846	28.7909	33.6166	40.642	55.689	75.5043	124.6
0.291843	0.55465	0.874196	1.1093	1.43083	1.7859	2.11643	2.51166	2.89934	3.41515	4.03091	5.18622	6.31115	7.48465	8.80452	10.254	12.0377	13.5441	16.0438	19.6869	24.5169	28.8602	33.6411	40.7363	55.8866	75.6377	125.192
0.292329	0.555887	0.87454	1.11046	1.43496	1.79159	2.11698	2.51203	2.89973	3.416	4.05249	5.19867	6.36745	7.50081	8.80452	10.2728	12.0611	13.6221	16.0505	19.6998	24.5516	28.9015	33.6778	40.9455	56.0829	75.6655	125.547
0.292563	0.556259	0.88053	1.11152	1.43496	1.79159	2.12725	2.51798	2.902	3.41884	4.09197	5.23582	6.41734	7.54157	8.83542	10.2831	12.0812	13.6271	16.0676	19.746	24.5772	28.9053	33.7502	41.5427	56.383	75.8735	126.345
0.293128	0.557722	0.887304	1.12741	1.43641	1.79159	2.12736	2.52154	2.92439	3.41884	4.15605	5.2804	6.42346	7.55556	8.83666	10.2868	12.0917	13.6743	16.1147	19.8023	24.6552	28.9494	33.8417	42.0964	56.5014	75.9138	126.834
0.293531	0.557928	0.887304	1.12856	1.44578	1.79159	2.13003	2.53029	2.9323	3.42073	4.15798	5.29788	6.42528	7.63845	8.87264	10.3066	12.0997	13.7407	16.1648	19.8846	24.7987	28.9552	33.9969	42.1709	56.5251	76.1007	126.865
0.29432	0.56364	0.887304	1.13269	1.44635	1.79159	2.13973	2.53369	2.95578	3.43045	4.17083	5.30017	6.43961	7.69031	8.92752	10.3071	12.1187	13.7498	16.1859	20.0646	24.8297	29.0363	34.3257	42.37	56.9088	76.4259	126.954
0.294843	0.564741	0.887304	1.13336	1.44718	1.79572	2.14246	2.54441	2.96336	3.44531	4.19083	5.37477	6.44629	7.70614	8.94739	10.3389	12.1633	13.7681	16.2013	20.0804	24.9029	29.1645	34.3348	42.4064	57.4332	76.6494	130.431
0.295075	0.56717	0.887304	1.13473	1.45006	1.79575	2.14688	2.54955	2.96336	3.44962	4.20705	5.3897	6.4573	7.72358	8.99737	10.4491	12.2936	13.7694	16.22	20.1024	24.9401	29.1682	34.399	42.7047	57.7193	76.7347	131.801
0.29524	0.567529	0.887304	1.13782	1.45908	1.79627	2.16324	2.55812	2.97111	3.45409	4.21245	5.41406	6.45967	7.72696	9.00392	10.5172	12.3047	13.8057	16.2587	20.1887	24.9734	29.1685	34.521	42.717	58.1043	76.8116	146.478
0.29525	0.567913	0.888938	1.13796	1.46836	1.80424	2.16356	2.56929	2.97356	3.46478	4.21743	5.41406	6.47514	7.75865	9.01187	10.582	12.306	13.8771	16.6386	20.2443	25.0166	29.2549	34.7039	42.7839	58.1516	76.9577	147.303
0.295301	0.56945	0.890074	1.14662	1.4759	1.80494	2.1694	2.57553	2.97356	3.46735	4.24691	5.41434	6.48074	7.78174	9.10879	10.6163	12.3316	13.932	16.6671	20.2464	25.2774	29.2672	34.7656	42.835	58.4962	77.0321	147.437
0.295767	0.574271	0.894346	1.15836	1.47656	1.80528	2.17692	2.57967	2.98029	3.4749	4.26417	5.44568	6.5229	7.81432	9.13034	10.7566	12.3354	13.9906	16.7184	20.3999	25.387	29.2769	34.8561	43.2523	58.5476	77.0474	148.332
0.29607	0.577271	0.894346	1.15856	1.49213	1.82192	2.17991	2.59363	2.98831	3.48047	4.29237	5.46417	6.52333	7.81971	9.13535	10.7889	12.3357	14.0051	16.7416	20.4391	25.4252	29.2837	35.1354	43.3467	58.7553	77.1244	148.941
0.298189	0.577862	0.902904	1.16818	1.51469	1.82701	2.18024	2.61344	2.99245	3.50011	4.29784	5.49686	6.54299	7.84393	9.14552	10.8002	12.3396	14.0423	16.9346	20.4512	25.4837	29.3596	35.2583	43.7535	58.7832	77.3684	150.499
0.298495	0.577924	0.906734	1.17161	1.5166	1.83124	2.18156	2.61601	2.99386	3.51079	4.30118	5.50215	6.55231	7.85324	9.19272	10.8644	12.3417	14.0957	16.9385	20.563	25.4975	29.4518	35.2861	43.8883	59.2003	77.4414	152.938
0.29891	0.578841	0.907545	1.17337	1.5179	1.83976	2.18467	2.65023	2.99386	3.5268	4.31307	5.52873	6.62628	7.86386	9.24105	10.886	12.3431	14.1181	17.0167	20.7292	25.5296	29.4532	35.3057	43.9216	59.3708	77.5051	155.142
0.300566	0.581895	0.911849	1.17511	1.53088	1.84964	2.18952	2.6585	3.00071	3.52694	4.3406	5.55213	6.62628	7.92483	9.30708	10.9006	12.3563	14.1462	17.081	20.7812	25.6054	29.5786	35.4785	44.5641	60.2837	77.5449	155.154
0.305716	0.582108	0.913778	1.17763	1.53182	1.86511	2.19192	2.66268	3.00189	3.52962	4.35384	5.57097	6.62689	7.92483	9.37097	10.9354	12.359	14.2246	17.0835	20.828	25.6294	29.6399	35.5767	44.5865	60.6735	78.0982	159.717
0.30609	0.582116	0.915169	1.18558	1.54499	1.86665	2.1933	2.67004	3.01252	3.54025	4.35637	5.57671	6.64909	8.00177	9.37097	10.9662	12.3856	14.2491	17.0968	20.8464	25.6706	29.687	35.7666	44.6167	60.7149	78.8842	164.211
0.306732	0.584931	0.915309	1.18923	1.54624	1.87419	2.19995	2.67027	3.01766	3.56561	4.37546	5.59619	6.66782	8.0091	9.3899	10.9753	12.4083	14.2915	17.1121	21.027	25.702	29.7235	35.8347	44.7268	60.7493	79.1447	167.663
0.3073	0.584956	0.920721	1.1942	1.55062	1.8749	2.20113	2.67729	3.0342	3.57703	4.40226	5.6118	6.68166	8.01685	9.41932	11.0462	12.4188	14.2918	17.1723	21.1471	25.7163	29.8424	36.0587	44.7647	60.8221	79.1508	168.771
0.308724	0.586276	0.920955	1.20506	1.5554	1.88146	2.20346	2.6793	3.05189	3.57984	4.4173	5.63315	6.68356	8.03488	9.45773	11.0499	12.4219	14.3697	17.3294	21.2582	25.7534	30.0396	36.0693	44.8364	61.1284	79.8062	169.723
0.309616	0.58633	0.921877	1.20595	1.55643	1.88907	2.21342	2.69901	3.06859	3.58318	4.43652	5.65209	6.69795	8.06121	9.48079	11.0605	12.4668	14.4032	17.3753	21.3848	25.832	30.0486	36.1204	44.9679	61.1789	80.9295	171.199
0.309977	0.589835	0.923553	1.20731	1.55643	1.89291	2.21484	2.70148	3.09342	3.60193	4.45695	5.65623	6.74688	8.11042	9.48848	11.0849	12.4758	14.4348	17.4571	21.4384	25.8601	30.1405	36.149	45.1694	61.2101	81.1352	171.449
0.310988	0.590944	0.924667	1.2173	1.55695	1.92205	2.21484	2.70269	3.09874	3.60692	4.47167	5.6729	6.7575	8.11415	9.5574	11.1116	12.4893	14.4443	17.4863	21.4892	25.8764	30.1582	36.1655	45.5589	61.3634	81.61	171.858
0.311182	0.592367	0.925208	1.21985	1.55709	1.92205	2.21484	2.71373	3.11287	3.64214	4.49079	5.73984	6.8056	8.16409	9.57555	11.1476	12.501	14.4776	17.4944	21.5279	26.0206	30.1586	36.4169	45.6972	61.9321	82.0142	172.231
0.311597	0.592409	0.927947	1.22616	1.55766	1.92205	2.21769	2.73525	3.11477	3.64688	4.49555	5.75302	6.82439	8.17346	9.62996	11.2935	12.5484	14.5279	17.5021	21.5665	26.0628	30.2511	36.4671	45.6973	61.9736	82.0657	172.843
0.312469	0.595357	0.930639	1.22661	1.56952	1.92205	2.23447	2.74773	3.1163	3.65845	4.51847	5.78198	6.84066	8.21309	9.66364	11.3425	12.5604	14.5566	17.6108	21.5736	26.0928	30.2627	36.4997	45.8085	62.0239	82.2399	174.634
0.315884	0.601114	0.932597	1.23047	1.57577	1.92217	2.24858	2.74935	3.11654	3.6996	4.53774	5.84452	6.86421	8.25424	9.69809	11.3444	12.5673	14.6214	17.6972	21.6008	26.0964	30.2752	36.818	45.8937	62.2227	82.3753	175.571
0.318745	0.601568	0.933467	1.23047	1.57577	1.9346	2.25351	2.76519	3.12865	3.74776	4.54072	5.84958	6.86667	8.25424	9.72537	11.3952	12.6017	14.7871	17.8183	21.8773	26.0978	30.3	36.8314	45.9668	62.8311	83.1249	176.355
0.321998	0.606887	0.934003	1.23047	1.581	1.9467	2.25511	2.78423	3.1322	3.84146	4.55926	5.86677	6.8809	8.2689	9.83452	11.4387	12.6073	14.825	17.8341	21.9148	26.1601	30.3221	36.9152	46.2772	62.882	84.1936	180.4
0.32288	0.610894	0.937424	1.23047	1.58251	1.95382	2.26887	2.78869	3.1695	3.85324	4.59989	5.86989	6.89502	8.31392	9.84277	11.4497	12.6493	14.8352	17.9453	21.9252	26.1688	30.3735	36.919	46.9039	63.0043	85.3289	183.317
0.325455	0.612502	0.939733	1.23047	1.59509	1.95467	2.28092	2.79405	3.17893	3.87802	4.62388	5.89783	6.99344	8.32712	9.8499	11.4938	12.6541	14.9301	18.0254	22.1771	26.2462	30.5098	37.0263	46.95	63.39	85.6452	193.303
0.325941	0.616018	0.940028	1.23047	1.59529	1.96419	2.28593	2.8059	3.19896	3.87863	4.64397	5.91137	7.02888	8.34254	9.85269	11.5266	12.6605	14.9344	18.1117	22.1976	26.2965	30.6058	37.1263	46.9807	63.5446	85.8924	196.268
0.326401	0.619576	0.944666	1.23047	1.59825	1.96875	2.32164	2.81428	3.21145	3.89486	4.64663	5.91194	7.06492	8.39314	9.90889	11.5872	12.7216	14.9692	18.1278	22.2211	26.3035	30.7228	37.3556	47.0556	64.571	86.2466	198.583
0.326685	0.620517	0.945223	1.23047	1.60903	1.97781	2.32492	2.82425	3.23026	3.91703	4.72731	5.92706	7.08034	8.4177	9.95388	11.6195	12.828	14.9814	18.247	22.524	26.3224	30.7449	37.3617	47.1147	64.9487	86.2718	199.297
0.326816	0.623453	0.946036	1.24023	1.61936	1.98407	2.33546	2.82757	3.23686	3.9375	4.77292	5.93412	7.08562	8.42232	9.99335	11.6547	12.8559	14.9814	18.2876	22.5409	26.451	30.8699	37.3886	47.3341	65.9628	87.224
0.329286	0.632441	0.947518	1.24023	1.63342	1.98407	2.33892	2.84039	3.24898	3.9443	4.79407	5.94355	7.09197	8.42489	10.0155	11.6756	12.8664	15.0482	18.3451	22.5735	26.4708	30.9031	37.4139	47.5496	66.0192	87.3127
0.329908	0.634968	0.951136	1.24023	1.64288	1.99505	2.37078	2.85772	3.27493	3.95895	4.825	5.95221	7.09222	8.4405	10.0387	11.6915	12.8995	15.1003	18.4061	22.7142	26.8543	30.9109	37.4945	47.621	66.1333	88.3682
0.333864	0.638342	0.953179	1.25484	1.65032	2.00175	2.41323	2.88045	3.27546	3.96814	4.83395	5.96154	7.14396	8.46462	10.0994	11.695	13.0031	15.145	18.4077	22.7214	26.8812	30.9186	37.5175	47.7831	66.4294	90.1792
0.335115	0.639794	0.955656	1.25484	1.65085	2.00201	2.41804	2.8809	3.28164	3.96814	4.83498	5.96554	7.15235	8.50885	10.1168	11.7022	13.0201	15.1483	18.52	22.7249	26.9991	30.9512	37.5935	47.7963	66.4731	90.255
0.335771	0.640296	0.958085	1.25484	1.65085	2.00322	2.42374	2.88915	3.2833	3.98237	4.84748	6.00332	7.1748	8.50887	10.1671	11.7224	13.0646	15.3146	18.5961	22.7499	27.0785	31.0546	37.6711	48.1535	66.8003	90.9625
0.335956	0.643525	0.961649	1.25709	1.65085	2.00681	2.42809	2.90046	3.32686	4.00913	4.88265	6.00635	7.22207	8.5136	10.1892	11.7532	13.1071	15.4291	18.6099	22.7587	27.1153	31.2345	37.8145	48.3159	66.8149	91.0959
0.336474	0.645994	0.962	1.25838	1.65085	2.00692	2.46034	2.9072	3.33227	4.01253	4.90338	6.07807	7.24202	8.67286	10.1973	11.7665	13.1518	15.4297	18.6966	22.8032	27.1706	31.2868	37.8651	48.485	67.3138	91.3749
0.337819	0.646608	0.962051	1.26551	1.65085	2.0193	2.46094	2.90913	3.35667	4.03624	4.91464	6.09815	7.24719	8.67554	10.1973	11.7867	13.2068	15.4598	18.7047	22.888	27.197	31.3832	37.9495	48.4902	67.3596	91.3886
0.340307	0.649216	0.962156	1.26674	1.65284	2.02034	2.46456	2.91794	3.36118	4.0422	4.91708	6.1117	7.28068	8.68542	10.2358	11.7979	13.2468	15.5815	18.7419	23.0271	27.2187	31.3834	37.9788	48.5809	67.64	91.8246
0.340615	0.655285	0.965516	1.26881	1.65347	2.02491	2.46542	2.93218	3.39796	4.07574	4.92206	6.12158	7.31693	8.70449	10.2418	11.8242	13.2514	15.5861	18.8052	23.059	27.2571	31.4424	38.0114	48.8642	67.7205	92.2987
0.340912	0.657461	0.966895	1.27017	1.66053	2.02726	2.47321	2.93232	3.41203	4.0802	4.93051	6.14903	7.3746	8.72158	10.3794	11.8253	13.3334	15.6274	18.8459	23.1049	27.2919	31.4739	38.2354	48.8877	67.826	95.3539
0.341645	0.660645	0.970167	1.271	1.66067	2.02771	2.47599	2.96242	3.41225	4.09582	4.94338	6.16748	7.41222	8.81139	10.3827	11.8489	13.3397	15.6807	18.874	23.1741	27.3133	31.6035	38.2521	48.9519	67.9206	96.0989
0.341682	0.665117	0.973586	1.29139	1.67062	2.02934	2.4829	2.96336	3.41884	4.14947	4.94572	6.16835	7.4395	8.8217	10.3881	11.8808	13.3731	15.7915	19.0004	23.2275	27.4056	31.6159	38.3937	49.1784	67.9668	96.2291
0.341788	0.667334	0.975798	1.29417	1.67193	2.02934	2.49316	2.96336	3.42631	4.15079	5.00407	6.25066	7.46701	8.8217	10.4062	11.9039	13.3829	15.8092	19.0083	23.2535	27.4287	31.693	38.421	49.3392	68.0163	96.7436
0.342327	0.669042	0.980913	1.29705	1.68799	2.03384	2.49769	2.96434	3.42769	4.18415	5.01326	6.27069	7.53015	8.87304	10.4388	11.9057	13.4048	15.8228	19.03	23.3008	27.64	31.7005	38.4519	49.9616	68.0546	97.1533
0.343189	0.670758	0.984375	1.30738	1.69786	2.04071	2.50238	2.96605	3.45409	4.20904	5.0834	6.27416	7.53405	8.87645	10.4438	11.9694	13.4578	15.8655	19.1653	23.3299	27.6981	32.1505	38.4717	50.1404	68.1218	97.3278
0.343632	0.673739	0.986692	1.31882	1.69796	2.04597	2.50321	2.97175	3.45767	4.29784	5.11938	6.27418	7.53989	8.94442	10.4467	11.9911	13.5203	15.8686	19.1784	23.4836	27.7137	32.2392	38.6076	50.2192	68.43	97.4482
0.344625	0.6777	0.992188	1.31946	1.6992	2.05563	2.50967	2.97356	3.50119	4.30931	5.17131	6.27578	7.58707	8.96862	10.4509	12.0083	13.5646	15.9305	19.2322	23.4863	27.7147	32.3033	38.7239	50.463	68.5666	97.762
0.345436	0.679998	0.994183	1.32064	1.70279	2.06416	2.5116	2.97356	3.51543	4.31391	5.17382	6.32783	7.59361	9.02263	10.5	12.0158	13.5957	15.9458	19.2388	23.6264	27.7198	32.3297	38.918	50.7579	68.6324	97.8935
0.346077	0.683235	1.00304	1.32526	1.70571	2.08056	2.51391	2.97568	3.5184	4.36079	5.22044	6.35094	7.5938	9.0466	10.5012	12.0163	13.6032	15.9502	19.2529	23.6364	27.7571	32.3315	38.9966	50.8885	68.6994	98.4798
0.346144	0.684632	1.00305	1.32992	1.70611	2.0834	2.52226	2.99363	3.52353	4.38232	5.36122	6.36871	7.60316	9.06816	10.5094	12.054	13.6155	15.9582	19.354	23.7197	27.7847	32.5086	39.0093	50.9568	68.8997	98.7582
0.3464	0.68604	1.00386	1.33227	1.70704	2.08797	2.53369	2.99386	3.52353	4.40226	5.3933	6.37466	7.60647	9.08623	10.5475	12.0661	13.6155	15.9618	19.3625	23.7369	27.8278	32.5238	39.0658	51.447	68.9735	99.2775
0.347728	0.686916	1.0103	1.33577	1.72052	2.08817	2.53663	3.00396	3.55388	4.43401	5.39539	6.38211	7.65662	9.08867	10.5644	12.0987	13.6329	16.0139	19.4991	23.8041	27.8929	32.6151	39.0976	51.4812	68.9879	99.3515
0.348029	0.690064	1.01429	1.33577	1.72102	2.09254	2.5538	3.00396	3.5591	4.43652	5.41965	6.38453	7.6864	9.09691	10.7423	12.0995	13.6333	16.0312	19.5285	23.8427	27.9149	32.6536	39.2351	51.5546	69.1033	99.5039
0.348029	0.690203	1.01467	1.33756	1.72266	2.09895	2.55886	3.00541	3.58185	4.43652	5.45952	6.39819	7.69908	9.10879	10.7688	12.1072	13.7125	16.2251	19.5672	23.956	27.9162	32.8326	39.3696	51.624	69.1418	99.7005
0.348029	0.690898	1.01467	1.33759	1.72266	2.10263	2.56708	3.0065	3.59254	4.43652	5.45953	6.43878	7.71502	9.10879	10.7996	12.114	13.7544	16.2335	19.6083	23.9623	27.9224	32.8892	39.3702	51.7019	69.2679	99.9263
0.348029	0.692276	1.01467	1.34697	1.72266	2.10263	2.56782	3.02911	3.59487	4.4685	5.49232	6.48782	7.72135	9.14911	10.8174	12.1198	13.7647	16.2436	19.627	23.9934	27.939	33.0684	39.5405	51.9222	69.2928	100.028
0.348029	0.693182	1.01467	1.34699	1.72428	2.10591	2.56929	3.03076	3.60095	4.51704	5.54587	6.52886	7.72358	9.18475	10.8292	12.1719	13.79	16.2662	19.7121	24.02	27.9905	33.1688	39.5794	52.6692	69.5233	100.13
0.348029	0.693692	1.01467	1.35569	1.74015	2.10816	2.56929	3.04401	3.60152	4.57955	5.5465	6.55016	7.73503	9.18485	10.8385	12.1843	13.7945	16.3611	19.7192	24.0358	28.107	33.1965	39.6203	52.9004	69.6763	100.171
0.348029	0.694135	1.01467	1.3724	1.74015	2.11385	2.56929	3.04401	3.62198	4.60278	5.6052	6.58128	7.74405	9.28796	10.8398	12.2552	13.8143	16.371	19.7558	24.0378	28.172	33.2015	39.6455	53.061	69.8438	100.475
0.348029	0.69455	1.01614	1.37452	1.74606	2.12294	2.57993	3.04401	3.63353	4.60733	5.66284	6.59513	7.75084	9.28915	10.8508	12.2603	13.8601	16.3887	19.7566	24.0469	28.1915	33.4633	40.0612	53.0657	69.8462	101.49
0.348029	0.696058	1.01942	1.37877	1.75396	2.1239	2.58301	3.06961	3.64202	4.62388	5.66435	6.59831	7.76175	9.29929	10.8533	12.2735	13.8742	16.5616	19.8178	24.2909	28.2355	33.4731	40.0862	53.167	69.9215	101.669
0.348029	0.696058	1.02742	1.37976	1.75396	2.12561	2.58971	3.07493	3.6486	4.65195	5.71041	6.68542	7.76841	9.30817	10.888	12.2983	13.8858	16.6325	19.8813	24.3349	28.2959	33.5563	40.1588	53.3836	69.9865	102.697
0.348029	0.696058	1.02958	1.38354	1.75396	2.12666	2.59806	3.08409	3.65374	4.65994	5.72399	6.74744	7.78217	9.31061	10.9081	12.379	13.9001	16.6564	19.8917	24.3745	28.2989	33.5817	40.2038	53.5111	70.0096	102.875
0.348029	0.696058	1.03494	1.39212	1.75396	2.14274	2.6041	3.10133	3.65845	4.66018	5.7269	6.75939	7.81631	9.3548	10.9152	12.4101	14.0359	16.7289	20.0565	24.4829	28.3249	33.7472	40.2546	53.6133	70.0969	103.04
0.348029	0.699698	1.0409	1.39327	1.75439	2.15183	2.61601	3.11072	3.69141	4.66866	5.75505	6.77481	7.84644	9.42791	10.941	12.5069	14.1748	16.7505	20.1553	24.5516	28.3968	34.006	40.7897	53.8616	70.2058	103.529
0.348029	0.701516	1.0424	1.39529	1.768	2.17747	2.61601	3.1153	3.69534	4.67747	5.76616	6.838	7.85393	9.43747	10.9445	12.5144	14.1842	16.7747	20.3614	24.5553	28.4479	34.06	41.4763	54.143	70.2128	103.566
0.348029	0.701534	1.04409	1.39839	1.76874	2.18642	2.62742	3.11991	3.69963	4.70922	5.77075	6.8416	7.87884	9.45914	10.9753	12.559	14.1977	16.8381	20.4524	24.5645	28.5504	34.0982	41.6261	54.1556	70.2614	103.839
0.348029	0.701583	1.05145	1.40321	1.77085	2.19453	2.62883	3.12381	3.7212	4.73022	5.79623	6.84244	7.90478	9.46742	11.0348	12.5688	14.2013	16.8617	20.6461	24.6076	28.5547	34.1297	41.647	54.2133	70.4214	104.151
0.34852	0.701583	1.05276	1.4041	1.77461	2.19913	2.6451	3.12446	3.76474	4.74123	5.81489	6.87018	7.93628	9.49616	11.0556	12.5725	14.2043	16.8666	20.6714	24.8177	28.6545	34.3518	41.6851	54.4285	70.4705	105.221
0.348965	0.701583	1.05384	1.40867	1.78372	2.21405	2.65941	3.18433	3.76887	4.7615	5.82419	6.87931	8.00769	9.53424	11.0585	12.5725	14.3181	17.0012	20.7118	24.8474	28.7322	34.3775	41.7511	54.7376	70.5015	105.38
0.34926	0.701884	1.05699	1.41006	1.79151	2.21484	2.66041	3.19922	3.82061	4.77228	5.83249	6.89062	8.085	9.61027	11.069	12.6402	14.3387	17.0139	20.8211	24.9731	28.8098	34.3779	41.7961	55.1761	70.5221	105.57
0.34931	0.702105	1.05901	1.42029	1.79159	2.21484	2.68864	3.19922	3.84193	4.82247	5.83653	6.90556	8.09546	9.63026	11.0828	12.6491	14.4365	17.0149	20.9868	24.9899	29.0434	34.5696	41.8251	55.3157	70.5517	106.042
0.349409	0.70347	1.06228	1.42424	1.80251	2.21484	2.69042	3.22259	3.85198	4.8453	5.89787	6.93304	8.12482	9.63313	11.0924	12.6789	14.4375	17.1362	21.027	25.0791	29.0766	34.7537	42.1539	55.4989	70.6825	106.766
0.350002	0.704225	1.06462	1.43112	1.81515	2.21555	2.69082	3.24332	3.85473	4.86061	5.92672	7.02482	8.14534	9.648	11.0988	12.6832	14.4443	17.1861	21.0501	25.0906	29.1702	34.7903	42.3031	55.6697	70.9776	106.946
0.350024	0.708389	1.0661	1.43358	1.81615	2.21785	2.70804	3.2698	3.85766	4.90338	5.92738	7.05135	8.15756	9.66755	11.1049	12.7007	14.545	17.2724	21.084	25.1056	29.2674	34.8153	42.3741	55.7173	71.0546	107.209
0.350791	0.70924	1.06857	1.43496	1.82126	2.22019	2.71819	3.27386	3.88521	4.93564	5.92753	7.05889	8.17911	9.75135	11.1304	12.7371	14.5695	17.3474	21.1071	25.1287	29.566	34.8892	42.4671	55.7448	71.1364	107.796
0.350791	0.710095	1.07166	1.43591	1.83287	2.22847	2.72852	3.28623	3.89108	4.95054	6.00163	7.08786	8.18054	9.78695	11.1585	12.7463	14.6318	17.3972	21.1809	25.1676	29.5755	35.1676	42.8267	56.0374	71.2578	107.946
0.350791	0.713402	1.0798	1.43949	1.85574	2.23127	2.73104	3.28808	3.89108	4.95939	6.01874	7.09054	8.21018	9.8714	11.2117	12.7682	14.6702	17.4796	21.1869	25.1945	29.5776	35.1991	42.9902	56.2247	71.3494	108.727
0.350791	0.713979	1.08292	1.44578	1.86908	2.25098	2.74171	3.30169	3.8987	4.96138	6.02631	7.0921	8.24546	9.87225	11.2535	12.7698	14.7175	17.4882	21.2269	25.3587	29.6351	35.3569	43.4208	56.2591	71.3595	108.876
0.350791	0.715341	1.08833	1.44665	1.87419	2.26105	2.74502	3.31085	3.9361	4.98302	6.03507	7.13987	8.25424	9.87938	11.2665	12.8283	14.7738	17.5987	21.2624	25.5439	29.6561	35.4681	43.4862	56.4505	71.5811	109.076
0.350791	0.716019	1.0908	1.44818	1.88314	2.26887	2.75141	3.31085	3.96814	5.03126	6.03651	7.14096	8.28772	9.9352	11.2737	12.8284	14.7799	17.6353	21.3413	25.5818	29.6827	35.4848	43.5148	56.655	71.867	109.175
0.352637	0.716695	1.09458	1.45248	1.89204	2.26887	2.75141	3.31856	3.9896	5.03753	6.05938	7.16636	8.32728	9.9373	11.2917	12.8559	14.8066	17.66	21.4304	25.5868	29.7711	35.587	43.5162	56.7042	72.0369	109.251
0.353258	0.718372	1.09559	1.45265	1.89666	2.26887	2.75141	3.32334	4.03192	5.04238	6.06825	7.1748	8.38341	9.96783	11.3195	12.8567	14.8168	17.7166	21.6479	25.5949	29.8312	35.6608	43.6149	56.7474	72.1361	109.371
0.353409	0.719872	1.09812	1.453	1.90759	2.26887	2.75799	3.32464	4.03232	5.05058	6.10555	7.1748	8.38838	9.98938	11.3249	12.8761	14.8451	17.7522	21.6502	25.6781	29.9165	35.6828	44.0364	56.8016	72.2883	109.69
0.353688	0.721819	1.10056	1.45632	1.90765	2.26887	2.77237	3.32666	4.03761	5.06102	6.10916	7.19645	8.46221	9.99352	11.3891	12.8956	14.8869	17.7802	21.7026	25.8286	30.0331	35.7185	44.4329	56.8578	72.3788	110.243
0.353904	0.72325	1.10056	1.46675	1.91049	2.27278	2.78047	3.32719	4.03791	5.06556	6.1304	7.20525	8.52427	9.99697	11.3986	12.8959	14.895	17.8888	21.7581	25.8822	30.133	35.744	44.451	57.1548	72.5104	110.454
0.354266	0.72677	1.10056	1.47197	1.912	2.28531	2.8059	3.34724	4.05868	5.06861	6.13575	7.23471	8.52969	10.0206	11.416	12.9182	14.9043	18.0315	21.8397	25.9882	30.1424	35.8597	44.4674	57.3423	72.6623	111.079
0.358461	0.728481	1.10056	1.47814	1.91538	2.28688	2.80595	3.34724	4.07358	5.08916	6.1666	7.24041	8.57099	10.0293	11.4797	13.0151	14.9241	18.038	21.8993	25.9929	30.1545	35.9291	44.5184	57.7361	72.7726	111.218
0.358829	0.731167	1.10056	1.48253	1.92205	2.28705	2.82664	3.36955	4.07508	5.1422	6.16709	7.25243	8.60051	10.0423	11.5467	13.0517	14.9376	18.065	21.8995	26.0723	30.1786	36.0303	44.9113	57.7561	72.9509	111.472
0.359197	0.73372	1.10056	1.48595	1.92614	2.30089	2.83289	3.37392	4.10054	5.16797	6.2211	7.31302	8.67057	10.1168	11.5724	13.0523	15.004	18.0814	21.9064	26.1384	30.2126	36.2961	44.9293	58.4351	73.0074	111.619
0.359269	0.734745	1.10056	1.49213	1.92916	2.308	2.83818	3.37688	4.10912	5.17937	6.22573	7.39911	8.68158	10.1258	11.6516	13.0774	15.1228	18.1278	21.9662	26.1722	30.3185	36.3073	44.9916	58.515	73.2776	111.842
0.359531	0.734848	1.10183	1.49693	1.93352	2.31132	2.84108	3.3953	4.12479	5.19135	6.2306	7.4059	8.71087	10.1416	11.6526	13.1078	15.1823	18.1346	22.0355	26.1879	30.3694	36.3295	45.0245	58.7076	73.4848	114.347
0.359926	0.735581	1.10477	1.49693	1.93731	2.33962	2.85522	3.41763	4.12528	5.20655	6.23577	7.45792	8.71347	10.1598	11.6612	13.1332	15.2524	18.181	22.0863	26.1913	30.3734	36.3792	45.0834	58.7567	73.5657	114.662
0.360162	0.738244	1.10477	1.49693	1.93936	2.34007	2.85716	3.41884	4.15728	5.22782	6.2554	7.45842	8.73893	10.1735	11.6707	13.1537	15.3378	18.2342	22.0935	26.2881	30.3839	36.4367	45.229	58.9015	73.6857	115.103
0.360783	0.738281	1.10622	1.49693	1.94601	2.34678	2.863	3.42109	4.16945	5.23041	6.26828	7.48972	8.742	10.1817	11.7738	13.1618	15.368	18.3765	22.173	26.5263	30.5021	36.4749	45.3566	59.5123	73.8351	115.317
0.36145	0.738281	1.1093	1.50002	1.94992	2.35078	2.86438	3.42769	4.18359	5.2525	6.30136	7.54666	8.75212	10.2358	11.8355	13.2214	15.3913	18.386	22.2358	26.5272	30.5791	36.4786	45.3702	59.573	73.8519	116.595
0.364632	0.738281	1.1093	1.51308	1.96441	2.35081	2.86992	3.43655	4.21407	5.26664	6.30392	7.55967	8.78042	10.302	11.8395	13.2659	15.4115	18.4719	22.2589	26.6	30.6315	36.5022	45.5657	59.7978	74.0746	116.964
0.364769	0.738281	1.11175	1.53634	1.96716	2.36397	2.88045	3.45073	4.24824	5.28595	6.31417	7.58408	8.78386	10.3023	11.8563	13.2663	15.4335	18.5894	22.3219	26.6191	30.7108	36.5721	45.5699	60.2406	74.1139	117.54
0.367356	0.738281	1.11819	1.53995	1.96875	2.36672	2.89351	3.45425	4.24824	5.30102	6.35879	7.63278	8.7979	10.3476	11.8625	13.2697	15.4953	18.6364	22.3533	26.6714	30.8716	36.6167	45.6131	60.3688	74.324	117.769
0.367994	0.738281	1.11955	1.54637	1.99027	2.37184	2.89574	3.48071	4.28109	5.30102	6.40346	7.63973	8.8217	10.3506	11.9116	13.3187	15.6008	18.7553	22.5124	26.6739	31.0568	36.7395	45.6569	61.0045	74.4855	118.327
0.369139	0.74079	1.1198	1.54998	1.9931	2.38862	2.89906	3.48214	4.29784	5.31909	6.40644	7.6434	8.86267	10.3506	11.9135	13.3255	15.688	18.7689	22.5528	26.7457	31.1729	36.7578	45.7192	61.0972	74.5668	118.843
0.369829	0.740931	1.12028	1.55114	1.99677	2.39761	2.92184	3.49091	4.30199	5.32273	6.45777	7.67545	8.89008	10.3821	11.942	13.3391	15.7059	18.7747	22.5641	26.773	31.1986	36.8489	45.7221	61.168	74.9742	119.199
0.370561	0.742281	1.12145	1.55507	2.01215	2.3989	2.92354	3.49548	4.30488	5.33448	6.47166	7.67927	8.89565	10.3968	11.9788	13.4341	15.7197	18.7837	22.5794	27.0606	31.2936	36.9512	45.737	61.3134	75.0596	119.533
0.374675	0.744141	1.1223	1.55703	2.02186	2.41034	2.92442	3.53478	4.30894	5.35511	6.52837	7.69038	8.91304	10.4195	11.9943	13.4869	15.7807	19.0113	22.646	27.0728	31.3002	37.0039	45.7721	61.3243	75.2005	119.623
0.374813	0.744141	1.12658	1.55784	2.02188	2.4218	2.92519	3.54921	4.33939	5.35737	6.53059	7.69215	8.95795	10.4281	11.997	13.5143	15.8808	19.0533	22.6595	27.1076	31.334	37.0615	45.8282	61.3339	75.6533	120.201
0.375284	0.744141	1.12792	1.5648	2.02278	2.42374	2.95485	3.58453	4.34248	5.40286	6.55382	7.70075	9.0253	10.4298	12.0972	13.5328	15.9582	19.0655	22.6667	27.1659	31.3934	37.2362	45.8979	61.4988	76.4809	120.397
0.376264	0.749167	1.12884	1.56879	2.02753	2.44298	2.96336	3.60019	4.36079	5.42857	6.55774	7.70788	9.03794	10.433	12.14	13.5618	15.9673	19.102	22.7308	27.1691	31.4845	37.2442	46.0611	61.6994	76.7315	120.517
0.377099	0.750806	1.13314	1.57114	2.02934	2.44897	2.96932	3.61619	4.37823	5.4351	6.5666	7.73222	9.04637	10.4409	12.1784	13.586	16.0139	19.1189	22.75	27.1968	31.498	37.4356	46.1148	61.9736	76.7748	120.58
0.377788	0.751478	1.13421	1.57386	2.02934	2.45562	2.97964	3.64494	4.39044	5.43639	6.62628	7.75796	9.09873	10.4875	12.1974	13.651	16.0458	19.1969	22.845	27.2869	31.5794	37.4393	46.16	61.9932	76.816	120.742
0.379154	0.757306	1.13737	1.57529	2.03571	2.45577	2.99386	3.68529	4.39406	5.48744	6.63545	7.76756	9.12589	10.4922	12.1996	13.6935	16.1168	19.2217	22.8986	27.3071	31.593	37.6572	46.2686	62.2855	77.3649	120.935
0.379432	0.758034	1.13809	1.57577	2.04435	2.46085	3.00404	3.69141	4.4084	5.53027	6.69447	7.7701	9.13395	10.5199	12.2397	13.7328	16.1224	19.252	22.9078	27.3175	31.6487	37.663	46.3702	62.3709	77.8003	121.303
0.379901	0.758697	1.13928	1.57577	2.04545	2.46094	3.03192	3.69317	4.41525	5.54151	6.69704	7.78217	9.13433	10.5351	12.2422	13.7899	16.1409	19.2661	22.9971	27.3379	31.7097	37.6831	46.3972	62.7056	77.8754	121.343
0.38077	0.762078	1.14037	1.57584	2.06114	2.46094	3.03394	3.69781	4.46628	5.54418	6.71705	7.78364	9.1391	10.5463	12.2538	13.79	16.167	19.3768	23.0144	27.364	31.7547	37.7405	46.8984	62.7558	78.8518	121.866
0.381361	0.765234	1.14942	1.57779	2.07641	2.46094	3.05908	3.6996	4.47083	5.55093	6.72275	7.82331	9.15046	10.5893	12.2714	13.8361	16.1786	19.3919	23.0653	27.3707	31.8332	37.7451	47.467	62.8711	79.4563	122.716
0.382073	0.767243	1.1522	1.58274	2.07886	2.47321	3.06817	3.6996	4.51768	5.57295	6.73019	7.85189	9.16291	10.5924	12.3065	13.8685	16.2067	19.4664	23.0831	27.3709	31.8515	37.8455	47.8258	62.8715	79.8653	122.88
0.382281	0.767786	1.16869	1.58281	2.08817	2.47321	3.07977	3.70611	4.52438	5.58102	6.7575	7.88049	9.18721	10.6233	12.3093	13.9172	16.2099	19.4789	23.1207	27.3961	31.927	37.9176	47.8746	63.2035	80.4234	123.323
0.382738	0.769467	1.17046	1.58827	2.08817	2.47321	3.08015	3.73048	4.52438	5.61584	6.77093	7.90475	9.22333	10.6241	12.3145	13.9735	16.2441	19.4919	23.2137	27.3977	31.9986	37.9886	48.1194	63.3423	80.5031	123.935
0.383431	0.773999	1.17103	1.58827	2.08885	2.47816	3.08355	3.74106	4.56427	5.61719	6.80662	7.91198	9.23596	10.6247	12.3909	14.0246	16.3407	19.5341	23.2582	27.475	32.0584	38.0133	48.2487	63.3456	80.6335	124.216
0.384303	0.777776	1.17326	1.59056	2.09071	2.484	3.09925	3.77202	4.56984	5.62517	6.81388	7.94674	9.2594	10.6259	12.3974	14.0269	16.3636	19.5421	23.3785	27.5421	32.102	38.0356	48.2867	63.3838	80.9155	124.781
0.385321	0.778217	1.17666	1.59649	2.09474	2.48408	3.11287	3.77496	4.58604	5.68152	6.84475	7.95153	9.26372	10.6672	12.4026	14.0514	16.4901	19.5807	23.4342	27.6146	32.1164	38.047	48.3811	63.4774	81.029	127.523
0.386015	0.778217	1.17948	1.60116	2.10263	2.50759	3.12421	3.8147	4.64096	5.74512	6.85089	7.95153	9.26699	10.6676	12.4246	14.1247	16.522	19.6656	23.5305	27.6252	32.2224	38.1267	48.6151	64.0121	81.4927	129.548
0.386035	0.778217	1.19386	1.60996	2.10263	2.52384	3.13226	3.83147	4.66038	5.75215	6.87143	7.95173	9.30217	10.7048	12.4277	14.1249	16.5226	19.7708	23.5724	27.6456	32.2883	38.3686	48.8656	64.2005	81.6175	140.444
0.386695	0.778217	1.20453	1.61419	2.10272	2.52915	3.15455	3.8468	4.67486	5.753	6.89502	8.01415	9.37243	10.7122	12.4442	14.1327	16.5821	19.8339	23.5837	27.6707	32.2983	38.5409	48.9275	64.4418	81.7461	141.407
0.388194	0.778217	1.20506	1.61904	2.10355	2.53369	3.15801	3.85198	4.68804	5.76091	6.90625	8.03203	9.40251	10.7201	12.4576	14.1408	16.6418	19.9279	23.584	27.6938	32.3347	38.592	49.5255	64.4899	82.6527	141.997
0.388606	0.778217	1.20883	1.63117	2.11187	2.53766	3.17608	3.86057	4.69472	5.7788	6.91555	8.03488	9.40795	10.7452	12.4678	14.1467	16.7635	19.93	23.6151	27.7206	32.3574	38.7705	49.5826	64.9333	82.6908	142.218
0.389137	0.778217	1.20939	1.6326	2.11784	2.53973	3.18634	3.87327	4.71938	5.78005	6.94167	8.09339	9.42511	10.7616	12.4709	14.26	16.8192	19.9347	23.7579	27.7391	32.6331	39.0194	49.8205	64.9468	82.8974	143.021
0.390115	0.778217	1.21202	1.64651	2.11931	2.54418	3.21127	3.8849	4.73029	5.79236	6.94974	8.1027	9.49616	10.7622	12.4809	14.3853	16.8482	19.9757	23.8564	27.7462	32.6344	39.0358	49.8593	65.0479	83.6357	143.107
0.391092	0.778217	1.21624	1.64872	2.1216	2.5538	3.21673	3.88606	4.74191	5.79403	6.96493	8.1219	9.51691	10.7712	12.4829	14.4792	16.8597	20.0306	23.9129	27.8544	32.771	39.0805	50.0907	65.193	85.0768	145.191
0.393257	0.778217	1.21742	1.65085	2.12416	2.55673	3.23686	3.89108	4.74459	5.80802	6.98997	8.14621	9.52111	10.792	12.5332	14.5695	16.9443	20.0766	24.0946	27.9162	32.8369	39.1111	50.0932	65.2175	85.2455	147.416
0.394288	0.778217	1.22371	1.65289	2.12899	2.56929	3.23686	3.89108	4.74866	5.87804	6.9965	8.15458	9.52457	10.8076	12.5339	14.6214	16.9519	20.0854	24.2143	27.9372	32.8981	39.1674	50.4596	65.3415	85.6187	148.112
0.395759	0.778217	1.22373	1.65339	2.1292	2.56929	3.28189	3.89125	4.84725	5.89937	7.02603	8.18179	9.54049	10.8537	12.5801	14.6282	17.0043	20.0881	24.3012	27.9639	32.9674	39.2526	50.5342	65.3739	85.7686	150.275
0.396192	0.780017	1.22767	1.65913	2.14771	2.57028	3.2833	3.91153	4.88092	5.91137	7.02984	8.20612	9.55655	10.8562	12.5888	14.6432	17.08	20.1887	24.3441	27.9834	33.0069	39.2806	50.6508	65.4595	86.883	151.493
0.39782	0.789438	1.23047	1.66291	2.15464	2.57313	3.28755	3.92843	4.90818	5.93749	7.0551	8.24724	9.59324	10.9643	12.7282	14.6441	17.1062	20.2725	24.3774	28.086	33.3943	39.3019	50.823	65.5487	87.1259	151.882
0.398615	0.792421	1.23047	1.66395	2.15486	2.57717	3.28947	3.93433	4.90907	5.95498	7.06768	8.26909	9.60241	10.9811	12.7487	14.6587	17.117	20.2889	24.4222	28.0946	33.524	39.3724	50.8785	65.8005	87.1453	156.452
0.399122	0.793932	1.23047	1.67172	2.15652	2.59492	3.29371	3.96993	4.91423	5.97143	7.08961	8.27256	9.60447	11.0037	12.785	14.7704	17.1727	20.4955	24.4431	28.1421	33.6078	39.9628	51.3983	65.9903	87.9846	160.909
0.400541	0.795179	1.23047	1.684	2.16174	2.59539	3.30169	3.98049	4.91559	5.97376	7.11975	8.28127	9.62601	11.0284	12.7968	14.8076	17.1861	20.5809	24.4751	28.2075	33.6947	40.0377	51.5506	66.3005	87.9974	162.688
0.400732	0.796041	1.23047	1.68731	2.1662	2.5991	3.30169	3.98259	4.92188	5.98033	7.1328	8.35185	9.69357	11.0304	12.8193	14.8671	17.2151	20.6184	24.5275	28.2108	33.695	40.0589	51.9709	66.3145	89.2235	163.819
0.401054	0.799582	1.23047	1.6974	2.16795	2.60247	3.30169	4.00612	4.93239	5.99749	7.15447	8.35995	9.69809	11.0532	12.8283	14.8749	17.2547	20.6562	24.5419	28.2655	33.7279	40.2116	51.9855	66.32	89.581	165.006
0.401583	0.806899	1.23047	1.701	2.17456	2.60759	3.31085	4.03011	4.93374	6.01988	7.21234	8.35995	9.71856	11.1662	12.8413	14.907	17.3073	20.6643	24.7588	28.4363	33.8357	40.2309	51.9963	66.3235	90.7883	165.08
0.401967	0.808662	1.23178	1.71214	2.18013	2.61011	3.31149	4.0517	4.95618	6.02552	7.22552	8.39804	9.78726	11.1845	12.8502	14.9241	17.3684	20.7248	24.761	28.4491	33.8669	40.5258	52.1028	66.3596	90.9555	165.293
0.40203	0.809238	1.23571	1.72006	2.20113	2.61507	3.3138	4.05868	4.97694	6.03554	7.25194	8.43503	9.79052	11.2171	12.8776	14.9572	17.3816	20.7283	24.9078	28.4736	33.8734	40.6822	52.3272	66.4257	91.326	165.479
0.402148	0.812547	1.24023	1.72185	2.20982	2.61601	3.3279	4.07048	5.00092	6.06653	7.25262	8.44329	9.80059	11.2205	12.8818	14.9767	17.4446	20.7566	24.9419	28.5939	33.9098	40.8196	52.4601	66.4909	91.885	166.307
0.40412	0.813418	1.24023	1.72266	2.2115	2.62065	3.33684	4.07358	5.01557	6.06748	7.25386	8.45222	9.88027	11.2497	12.948	15.0108	17.5511	20.787	24.9662	28.6298	33.9707	40.9088	52.607	66.5864	92.0812	166.918
0.40482	0.819405	1.24023	1.72266	2.21215	2.62347	3.34005	4.07358	5.02784	6.07891	7.30273	8.48577	9.89886	11.254	13.013	15.0289	17.6434	20.8184	24.985	28.6909	34.0557	40.9533	52.6564	66.7363	92.4124	167.7
0.407977	0.821338	1.24023	1.72937	2.22847	2.63106	3.34724	4.07358	5.0305	6.09763	7.34685	8.54268	9.9289	11.2583	13.0352	15.044	17.7587	20.879	25.0487	28.7781	34.3791	41.0358	52.7106	66.7681	92.471	167.731
0.408431	0.822114	1.24211	1.72971	2.23171	2.63487	3.35255	4.09089	5.0361	6.11284	7.3623	8.57764	9.92961	11.323	13.0574	15.0781	17.7674	20.9552	25.0886	28.815	34.4072	41.154	52.9119	67.0612	92.6078	167.95
0.409096	0.82271	1.24263	1.73633	2.23857	2.63677	3.37462	4.09582	5.07018	6.11706	7.37949	8.58091	9.94903	11.3613	13.1055	15.0886	17.8284	20.9825	25.1093	28.8308	34.4363	41.2036	53.0197	67.0783	92.8738	168.674
0.409867	0.822804	1.25484	1.73664	2.24319	2.63677	3.38536	4.09582	5.07676	6.13809	7.39113	8.58612	9.98381	11.3971	13.1263	15.104	17.8346	20.9847	25.1145	28.9951	34.4459	41.3368	53.4277	67.0866	92.8918	169.298
0.410601	0.823314	1.25484	1.73836	2.25061	2.64272	3.4	4.1245	5.11506	6.15425	7.39144	8.5864	9.9947	11.5112	13.1332	15.1079	17.8876	21.0059	25.1708	29.0219	34.5781	41.3825	53.4573	67.115	93.0159	172.107
0.410958	0.825142	1.25484	1.73845	2.25271	2.65402	3.40061	4.12528	5.13054	6.16653	7.40994	8.5909	10.0112	11.6184	13.1539	15.1624	18.0581	21.0532	25.3105	29.2862	34.6048	41.4334	53.5668	67.1302	93.6069	172.283
0.412944	0.835773	1.25484	1.74015	2.25587	2.67137	3.41661	4.1253	5.16797	6.22072	7.42342	8.61328	10.0306	11.6322	13.1907	15.1742	18.0705	21.078	25.3212	29.2883	34.6653	41.6185	53.9066	67.1633	94.0307	175.506
0.413211	0.836059	1.262	1.74015	2.26285	2.69344	3.42664	4.14532	5.16955	6.2306	7.45748	8.66928	10.0557	11.6641	13.2572	15.2057	18.1874	21.1612	25.3369	29.2945	34.7247	41.6776	54.0071	67.1941	94.3624	177.301
0.416379	0.836948	1.26202	1.74015	2.26436	2.702	3.43712	4.14565	5.17942	6.24949	7.46281	8.70143	10.0578	11.689	13.2647	15.2549	18.2342	21.1738	25.3527	29.3587	34.7768	41.9602	54.0608	67.2575	94.5498	187.566
0.417254	0.838043	1.2627	1.74015	2.26438	2.71644	3.44186	4.14962	5.19018	6.26843	7.46332	8.7335	10.0593	11.7637	13.2953	15.2703	18.2864	21.2725	25.53	29.4605	34.823	42.1848	54.0794	67.3457	94.7311	190.708
0.418868	0.843245	1.26614	1.74015	2.26784	2.71819	3.44395	4.15467	5.19701	6.28956	7.4725	8.73993	10.063	11.7922	13.3544	15.3548	18.3104	21.3127	25.5333	29.7028	34.9382	42.3134	54.0891	67.7093	94.9925	193.235
0.420011	0.84383	1.27075	1.74015	2.26887	2.75113	3.47206	4.15508	5.22044	6.29274	7.48465	8.7414	10.0746	11.8096	13.4273	15.3749	18.3612	21.3365	25.5725	29.7293	34.9555	42.3405	54.1531	67.7826	94.9985	193.57
0.420825	0.847295	1.27171	1.74015	2.26887	2.75193	3.47307	4.16257	5.22164	6.32705	7.48515	8.81557	10.0773	11.8548	13.521	15.4258	18.3764	21.3459	25.6517	29.8138	34.9765	42.4934	54.2348	68.1897	95.3852	194.237
0.420974	0.849905	1.2732	1.74015	2.26887	2.75687	3.48029	4.22269	5.26519	6.32883	7.50081	8.8205	10.1043	11.8702	13.5374	15.5073	18.3815	21.511	25.6676	29.826	35.2829	42.6888	54.2769	68.1971	95.7238
0.422554	0.854667	1.27954	1.74947	2.26887	2.76869	3.48029	4.22409	5.27712	6.33402	7.51418	8.82317	10.1316	11.8763	13.5697	15.5598	18.3822	21.5358	25.675	29.8997	35.3027	42.8267	54.3207	68.2572	95.8856
0.423006	0.857342	1.28366	1.75061	2.26935	2.77098	3.4806	4.23417	5.27736	6.33845	7.51686	8.87717	10.1348	11.8866	13.5707	15.6584	18.4129	21.5538	25.6876	29.9183	35.376	42.8514	54.5407	68.3707	96.5213
0.427058	0.861633	1.29412	1.75371	2.27395	2.77675	3.48578	4.23519	5.28386	6.35425	7.52862	8.90812	10.1754	11.8924	13.591	15.6704	18.457	21.6055	25.7497	29.9944	35.4467	42.9478	54.5579	68.3897	96.9855
0.428469	0.868164	1.29553	1.75396	2.27468	2.7809	3.50027	4.24824	5.28529	6.3587	7.56124	8.91389	10.1992	11.8942	13.6587	15.7559	18.4785	21.6521	25.7626	30.0405	35.4887	43.0945	54.564	68.4127	97.473
0.428512	0.872142	1.29661	1.75885	2.29447	2.82817	3.50791	4.24824	5.29689	6.38297	7.56869	8.94554	10.2027	11.9613	13.7241	15.7843	18.4954	21.8981	25.8027	30.0787	35.5081	43.1205	54.5906	68.4145	97.5007
0.430637	0.873736	1.29856	1.7608	2.30101	2.82817	3.51582	4.30488	5.33528	6.38347	7.573	8.9478	10.2224	11.9833	13.79	15.798	18.4969	22.0453	25.856	30.1244	35.5709	43.1781	54.8176	68.5008	97.5036
0.431761	0.874309	1.30048	1.76372	2.30303	2.84563	3.52353	4.33616	5.34659	6.38422	7.5739	8.95087	10.2765	12.0183	13.8558	15.8661	18.5214	22.0738	25.9364	30.161	35.5928	43.1956	54.9847	68.6445	97.7782
0.432311	0.876081	1.30822	1.77197	2.32164	2.88045	3.52731	4.33905	5.35917	6.39844	7.58675	8.95729	10.2801	12.0721	13.9407	15.9031	18.5342	22.0773	25.9428	30.3549	35.6167	43.3517	55.17	68.6672	97.9387
0.434399	0.876254	1.3094	1.77461	2.32164	2.88213	3.52865	4.34053	5.37477	6.41654	7.59573	8.96873	10.2801	12.1033	13.9957	15.9465	18.6616	22.1307	26.1096	30.3633	35.7849	43.3921	55.3733	69.1169	98.0831
0.435289	0.877403	1.31091	1.77516	2.32857	2.89263	3.53859	4.353	5.40124	6.41734	7.60107	8.97583	10.3047	12.1137	13.9984	15.9961	18.6934	22.193	26.1115	30.4209	35.7953	43.4361	55.4381	69.1869	98.1966
0.437225	0.877824	1.31106	1.78004	2.33465	2.8927	3.54401	4.36198	5.40431	6.41734	7.63497	8.97583	10.3476	12.1249	14.0351	16.0584	18.7112	22.275	26.1198	30.4543	35.9156	43.5998	55.6765	69.3224	98.3689
0.437855	0.88095	1.31226	1.79159	2.33862	2.91121	3.55618	4.36456	5.40653	6.44854	7.64765	8.99011	10.3476	12.1566	14.0659	16.1465	18.7123	22.3149	26.1951	30.4605	35.9979	43.6281	55.8015	69.4373	98.6032
0.438519	0.882268	1.31384	1.79159	2.34324	2.92122	3.55658	4.36917	5.41965	6.48254	7.66192	9.00038	10.3566	12.2095	14.0718	16.1732	18.8104	22.3765	26.2223	30.4678	36.0317	43.6402	56.037	69.6276	98.6046
0.439088	0.883453	1.31644	1.7931	2.34389	2.92555	3.55968	4.38157	5.42018	6.48764	7.67628	9.00709	10.3644	12.2223	14.0739	16.1965	18.9698	22.4058	26.2309	30.5299	36.1341	43.6566	56.0802	69.6796	98.9393
0.443326	0.887304	1.32022	1.80091	2.34534	2.93398	3.55991	4.38157	5.43714	6.49215	7.70374	9.0253	10.3661	12.2257	14.0776	16.2025	19.0245	22.4067	26.2739	30.5697	36.2368	43.9283	56.2549	69.9006	99.6897
0.443961	0.887304	1.32526	1.81524	2.36006	2.94162	3.57084	4.39465	5.46417	6.49499	7.70561	9.04876	10.4514	12.248	14.1408	16.2163	19.0528	22.5098	26.3366	30.5959	36.2523	44.0488	56.5245	70.0404	99.7664
0.444748	0.887304	1.3319	1.81585	2.37432	2.94212	3.57134	4.39526	5.47216	6.49992	7.7138	9.05474	10.4678	12.3039	14.2022	16.2314	19.0576	22.5257	26.4067	30.6276	36.4116	44.0673	56.6171	70.1835	100.091
0.445296	0.887304	1.33244	1.81941	2.38502	2.95202	3.57738	4.39678	5.49025	6.50949	7.7275	9.10624	10.4759	12.3271	14.2246	16.2441	19.0686	22.5994	26.5534	30.8392	36.4369	44.2597	56.741	70.3303	100.626
0.44589	0.887304	1.33348	1.82302	2.39226	2.96336	3.58318	4.40352	5.50198	6.51568	7.74158	9.1091	10.521	12.344	14.2311	16.3416	19.1055	22.6579	26.5624	30.8835	36.5079	44.2831	56.7458	70.6318	100.749
0.446832	0.887304	1.33384	1.8281	2.39326	2.96336	3.63353	4.41635	5.51287	6.52305	7.74912	9.11573	10.523	12.3449	14.2336	16.3556	19.1084	22.6865	26.7711	30.9195	36.6236	44.4632	56.8881	70.6323	101.241
0.448404	0.887304	1.33577	1.83312	2.42374	2.96336	3.63612	4.41711	5.51824	6.5642	7.77049	9.12075	10.5677	12.3518	14.2415	16.3665	19.1361	22.7536	26.8159	30.9291	36.742	44.9159	57.2558	70.6396	101.947
0.451019	0.887304	1.33577	1.83974	2.42374	2.96987	3.64109	4.42434	5.52142	6.5666	7.77049	9.12423	10.5856	12.3845	14.3082	16.4646	19.1591	22.7652	26.8186	31.0166	36.7677	45.2772	57.5765	70.6872	102.068
0.451047	0.887304	1.33643	1.83998	2.42772	2.97356	3.64577	4.4415	5.54959	6.59757	7.83259	9.15136	10.6076	12.42	14.3264	16.4774	19.2282	22.7836	26.8407	31.1156	36.8458	45.3307	57.7971	70.7613	102.201
0.452818	0.891244	1.33712	1.86012	2.42777	2.97356	3.64678	4.44301	5.5578	6.60032	7.83267	9.19924	10.6125	12.4367	14.3505	16.4909	19.2364	22.7926	26.8499	31.1721	36.9804	45.4116	57.957	70.8553	103.146
0.453851	0.892056	1.3425	1.87419	2.42872	2.98618	3.65734	4.44652	5.55993	6.60339	7.84393	9.20151	10.6533	12.4636	14.3552	16.5584	19.2842	22.8883	26.8624	31.2568	37.0066	45.6038	58.0235	70.9433	103.669
0.456459	0.89207	1.35995	1.87419	2.4293	3.00996	3.65845	4.47469	5.56028	6.62171	7.86057	9.20345	10.6616	12.466	14.4191	16.5676	19.3116	22.9273	26.8638	31.2888	37.1589	45.7455	58.0625	70.9476	103.868
0.457713	0.894346	1.36027	1.87419	2.4362	3.0278	3.69141	4.5039	5.5625	6.62628	7.87884	9.23753	10.6681	12.4981	14.4308	16.5913	19.3541	22.9718	26.8733	31.5087	37.277	45.7663	58.0719	71.1317	104.02
0.457852	0.894346	1.36398	1.87761	2.4362	3.0309	3.6984	4.50533	5.56659	6.63353	7.87884	9.24094	10.7298	12.5443	14.4337	16.5926	19.3719	22.9726	26.8819	31.5673	37.2884	45.8402	58.1641	71.4541	104.089
0.458051	0.894346	1.36615	1.88142	2.44298	3.03143	3.71419	4.51713	5.57291	6.63676	7.87884	9.24736	10.7298	12.5464	14.4341	16.5934	19.4074	23.0257	27.0277	31.7161	37.3071	45.9352	58.4736	71.5541	104.143
0.458476	0.894346	1.36954	1.88338	2.44298	3.03923	3.7207	4.52792	5.57933	6.6516	7.89287	9.25328	10.7953	12.5874	14.4443	16.7078	19.4705	23.0463	27.0759	31.7829	37.3101	45.9741	58.6663	71.6469	104.521
0.459173	0.896326	1.37595	1.88395	2.44646	3.04601	3.72407	4.54948	5.58736	6.66809	7.89423	9.25715	10.8393	12.5881	14.4467	16.7199	19.4723	23.056	27.1001	31.8116	37.4312	46.0195	59.0881	71.8095	104.573
0.459281	0.898199	1.38214	1.89729	2.44954	3.04797	3.74501	4.59761	5.63149	6.69028	7.91032	9.29823	10.8533	12.6091	14.4644	16.7931	19.476	23.2806	27.1223	31.8137	37.4891	46.1035	59.1496	71.8935	104.602
0.460105	0.898366	1.38987	1.89983	2.45554	3.05585	3.746	4.60935	5.64745	6.69447	7.93628	9.3	10.8613	12.6685	14.4895	16.8383	19.5325	23.3135	27.1495	31.8229	37.5675	46.1168	59.1905	72.0084	104.64
0.460552	0.900243	1.39081	1.90101	2.45962	3.06817	3.74809	4.62146	5.65214	6.69727	7.95869	9.30091	10.871	12.7027	14.5242	16.8785	19.5467	23.4858	27.1914	31.9219	37.6639	46.1326	59.2194	72.22	104.847
0.461951	0.900511	1.403	1.90623	2.46094	3.07119	3.75276	4.62976	5.6627	6.71497	7.97985	9.30389	10.9431	12.759	14.5297	16.899	19.5492	23.5351	27.2005	32.0682	37.6819	46.2271	59.6954	72.2953	105.121
0.465224	0.901672	1.40317	1.90716	2.47321	3.08355	3.75646	4.64272	5.66395	6.71705	7.98573	9.34232	10.9643	12.7745	14.5944	16.9125	19.6154	23.5676	27.2887	32.1228	37.6976	46.4173	59.8256	72.4436	105.847
0.465346	0.902935	1.40869	1.90749	2.47495	3.09245	3.76459	4.67785	5.6655	6.71705	7.99061	9.35729	10.9686	12.7749	14.6058	16.9545	19.7356	23.5968	27.3479	32.1413	37.7616	46.5143	60.0279	72.4724	105.994
0.465726	0.903306	1.41124	1.91195	2.47743	3.09512	3.78017	4.68014	5.68152	6.7575	8.01206	9.37097	10.9753	12.8051	14.6214	17.0138	19.7584	23.6248	27.353	32.1745	37.7885	47.0653	60.1234	72.5977	106.163
0.466071	0.909619	1.41613	1.9128	2.48047	3.101	3.79424	4.68225	5.68719	6.7575	8.01579	9.37321	11.0245	12.8472	14.6214	17.032	19.8693	23.64	27.4375	32.2001	37.8167	47.4291	60.4308	72.6845	106.249
0.467304	0.910333	1.41902	1.91346	2.49403	3.11275	3.79999	4.68245	5.69661	6.7575	8.03488	9.40323	11.072	12.8559	14.6337	17.0676	19.8978	23.7069	27.45	32.3727	37.8282	47.6788	60.6289	72.8375	106.397
0.470159	0.915669	1.42819	1.92128	2.50967	3.1153	3.81312	4.68938	5.69721	6.77025	8.03488	9.40997	11.1072	12.8771	14.671	17.093	19.9416	23.813	27.4538	32.5858	37.9368	47.7801	60.6823	72.9501	106.859
0.47131	0.921866	1.42935	1.92205	2.50967	3.11844	3.81818	4.69486	5.72399	6.79501	8.03732	9.43138	11.1136	12.8883	14.6875	17.0942	20.1159	23.821	27.5207	32.6564	38.081	47.8277	60.7592	72.9599	106.933
0.472597	0.921973	1.43496	1.92205	2.52017	3.12354	3.8204	4.70161	5.73526	6.79628	8.04617	9.44712	11.1208	12.9193	14.6935	17.1066	20.13	23.915	27.5441	32.6611	38.1827	47.8453	60.9293	73.5435	107.903
0.475691	0.931079	1.43496	1.93473	2.54038	3.12737	3.8204	4.70161	5.75648	6.79993	8.06121	9.44947	11.1288	12.938	14.7437	17.1797	20.1406	24.0127	27.6013	32.7506	38.2262	48.1203	61.3682	73.7917	108.053
0.477764	0.942893	1.43496	1.93731	2.54077	3.14191	3.8328	4.75278	5.76091	6.80552	8.07424	9.45155	11.1428	12.9474	14.7492	17.278	20.1898	24.0381	27.6325	32.8444	38.3141	48.137	61.8758	74.0133	108.936
0.477969	0.944389	1.43496	1.93896	2.54106	3.14552	3.8394	4.77128	5.79045	6.84211	8.08089	9.45461	11.1438	12.9751	14.8601	17.3197	20.2934	24.1316	27.6921	32.9071	38.3787	48.1656	61.8768	75.1473	109.176
0.478035	0.945852	1.43496	1.94518	2.54476	3.15154	3.85191	4.77488	5.80605	6.84268	8.1414	9.45461	11.1541	13.0403	14.8963	17.4015	20.3118	24.2033	27.6936	32.994	38.5826	48.2418	61.9502	75.3091	110.674
0.479111	0.946113	1.43496	1.95194	2.56929	3.15154	3.85295	4.77643	5.81192	6.84989	8.14562	9.46171	11.1544	13.1141	14.9146	17.4996	20.3416	24.2217	27.7701	33.0261	38.5866	48.2489	62.1051	75.6441	111.806
0.48456	0.946943	1.43496	1.95224	2.58549	3.16397	3.85385	4.78628	5.82048	6.85344	8.16747	9.49935	11.2015	13.1343	14.9218	17.5004	20.35	24.2537	27.8129	33.0683	38.6165	48.3399	62.1176	75.7092	111.886
0.485271	0.94946	1.43937	1.95417	2.58591	3.16408	3.89108	4.79624	5.82387	6.85716	8.21284	9.51709	11.2171	13.1907	15.0686	17.5211	20.3679	24.2559	27.8752	33.0818	38.6572	48.443	62.1916	76.0684	112.56
0.486993	0.953744	1.44635	1.95501	2.59596	3.16956	3.89108	4.83505	5.83403	6.86934	8.22041	9.52965	11.2386	13.2182	15.2281	17.5321	20.4026	24.2852	27.8849	33.2142	38.7466	48.4778	62.2126	76.2042	112.571
0.487598	0.957717	1.44635	1.96159	2.60532	3.17278	3.98337	4.84748	5.83574	6.86995	8.22043	9.54489	11.2452	13.2182	15.2297	17.5398	20.4217	24.298	27.9829	33.2233	38.7627	48.7391	62.2734	76.6249	112.753
0.488064	0.958236	1.44635	1.96401	2.61264	3.17632	3.99346	4.85233	5.84419	6.91541	8.22483	9.57504	11.2452	13.2225	15.2302	17.5431	20.4342	24.3047	28.0147	33.271	38.9023	48.7496	62.3434	76.9837	113.041
0.488442	0.962976	1.45081	1.96448	2.6145	3.2033	3.99676	4.85245	5.85412	6.93909	8.24064	9.58926	11.2489	13.2297	15.2323	17.6391	20.485	24.3092	28.0888	33.3789	38.9772	48.7775	62.5156	77.4805	114.263
0.488936	0.966068	1.45086	1.96872	2.61601	3.20867	4.00526	4.85276	5.86254	6.9397	8.26914	9.61179	11.2759	13.2364	15.2464	17.6496	20.5719	24.3288	28.1526	33.4496	39.1049	48.8656	62.5806	77.7982	114.358
0.490937	0.966234	1.45459	1.96879	2.61601	3.2164	4.00612	4.86917	5.86713	6.94368	8.27256	9.61363	11.3064	13.4139	15.2857	17.6823	20.6222	24.3288	28.1753	33.4561	39.1065	49.0731	62.598	78.5714	114.458
0.491489	0.966979	1.45874	1.97213	2.61601	3.21674	4.01153	4.88763	5.87979	6.96058	8.31605	9.6162	11.3539	13.4186	15.3184	17.6862	20.6941	24.3449	28.185	33.4769	39.132	49.2397	62.7539	78.6026	114.832
0.491969	0.967586	1.45947	1.9772	2.62001	3.22225	4.03791	4.90082	5.8873	7.00942	8.31979	9.62601	11.3762	13.4437	15.3328	17.6929	20.7322	24.4041	28.2765	33.5286	39.2479	49.3251	62.7574	78.99	114.945
0.492188	0.970459	1.46029	1.97832	2.62701	3.22515	4.0475	4.90338	5.89005	7.01606	8.3527	9.69175	11.4138	13.4476	15.3469	17.7614	20.7508	24.4085	28.2925	33.5704	39.2507	49.5376	62.8773	79.0271	115.501
0.492188	0.971107	1.46182	1.98144	2.62743	3.23306	4.05043	4.90626	5.89962	7.02271	8.35973	9.76034	11.4613	13.4627	15.3603	17.7646	20.7961	24.4196	28.3273	33.5866	39.4614	49.6938	62.924	79.1187	115.993
0.492188	0.973174	1.46359	1.98212	2.62757	3.2384	4.05763	4.91033	5.91436	7.02889	8.37697	9.76884	11.4622	13.4696	15.3843	17.8023	20.8197	24.5749	28.4012	33.6999	39.4861	49.7078	62.9669	79.4498	116.021
0.492188	0.9764	1.46517	1.98268	2.6446	3.26611	4.06546	4.91219	5.93997	7.03747	8.3997	9.77291	11.5323	13.481	15.4177	17.804	20.8694	24.6418	28.4622	33.777	39.628	49.8994	63.0048	80.0319	116.04
0.492188	0.984375	1.46657	1.98407	2.6483	3.27759	4.06612	4.92188	5.94814	7.04892	8.46383	9.77687	11.5599	13.5523	15.4279	17.8361	20.9237	24.6532	28.6373	33.7929	39.6281	49.9096	63.0634	80.3096	116.401
0.492188	0.984375	1.47412	1.98407	2.65051	3.2833	4.07162	4.92759	5.95221	7.07516	8.47506	9.85162	11.616	13.5626	15.4508	17.8424	20.9398	24.7289	28.7961	33.8109	39.6541	50.1135	63.1388	80.3254	116.486
0.492188	0.984375	1.47656	1.98407	2.65223	3.2833	4.0789	4.92802	5.9527	7.08082	8.51383	9.85605	11.6707	13.6187	15.5632	17.8869	20.9466	24.8507	28.8229	34.072	39.896	50.2526	63.1636	80.5689	116.882
0.492188	0.984375	1.48026	1.98407	2.65317	3.28419	4.08882	4.93269	5.95303	7.1328	8.53204	9.85936	11.7302	13.6443	15.5741	17.9178	20.9603	24.8599	28.8695	34.1007	40.1299	50.5021	63.2607	80.6805	116.941
0.492188	0.985349	1.48081	1.98407	2.65928	3.30169	4.09468	4.94162	5.95829	7.15071	8.53291	9.8626	11.7364	13.6988	15.5901	17.9188	20.9674	24.86	28.8859	34.138	40.3055	50.6055	63.3674	80.7609	116.969
0.492188	0.992188	1.48252	1.98407	2.66191	3.30169	4.09582	4.97196	5.96761	7.15378	8.55862	9.8714	11.7376	13.7328	15.5991	17.9279	21.1408	24.9184	28.9895	34.1867	40.8196	50.7559	63.5156	80.9484	117.2
0.492188	0.992942	1.48828	1.98407	2.66191	3.30401	4.11478	4.97797	5.98996	7.19336	8.56038	9.87731	11.7992	13.7363	15.6484	17.9281	21.2412	24.9403	29.0735	34.2545	40.8841	50.7795	63.5276	81.4016	117.28
0.492188	0.992959	1.48834	1.99559	2.66415	3.31941	4.12528	4.98115	5.99277	7.19672	8.57286	9.88366	11.8025	13.7946	15.6613	17.9332	21.3164	24.9576	29.1253	34.2848	40.9093	51.0975	63.6161	81.4455	117.293
0.492188	0.997656	1.48871	1.99599	2.66744	3.33252	4.12528	4.9927	6.03306	7.22756	8.5969	9.92036	11.8274	13.8012	15.6769	17.9481	21.3194	24.9839	29.3678	34.2876	41.083	51.1073	63.7745	82.0171	117.373
0.492188	0.998398	1.48882	1.99982	2.67246	3.33813	4.12846	4.99506	6.04616	7.24909	8.61871	9.93278	11.836	13.8092	15.698	18.0873	21.3291	25.0458	29.3771	34.3605	41.2748	51.1526	63.8655	83.4261	117.645
0.492188	0.999428	1.49095	1.99982	2.68304	3.34724	4.12936	4.99984	6.0694	7.25212	8.64486	9.94137	11.8681	13.8885	15.7039	18.0975	21.3335	25.1721	29.5569	34.3811	41.4285	51.2286	63.9014	83.6187	118.12
0.492188	1.00523	1.49493	2.00237	2.68357	3.34724	4.1526	5.00336	6.07939	7.27471	8.69369	9.94648	11.8942	13.8885	15.7075	18.2627	21.3521	25.1996	29.5797	34.5095	41.4654	51.3071	63.9389	83.701	118.453
0.492188	1.0075	1.4969	2.00889	2.70094	3.34724	4.16514	5.00721	6.09299	7.28616	8.69393	9.95692	11.9374	13.893	15.7519	18.2922	21.416	25.2188	29.5878	34.5631	41.5008	51.5095	63.9678	83.9194	118.509
0.492188	1.00862	1.49693	2.0099	2.70656	3.34948	4.17978	5.01023	6.0978	7.31097	8.69831	10.0146	11.9374	13.9445	15.7806	18.317	21.4596	25.229	29.7532	34.6845	41.7014	51.6098	64.0427	84.105	118.764
0.492188	1.00879	1.49693	2.01057	2.71819	3.35489	4.18142	5.02257	6.10172	7.32894	8.69905	10.1168	11.9596	13.9573	15.7856	18.3237	21.5593	25.3575	29.7789	34.8205	41.7191	51.8704	64.0979	84.1659	119.159
0.493654	1.01	1.49693	2.03259	2.72302	3.3642	4.18703	5.02723	6.19921	7.33932	8.69922	10.1348	11.9735	13.9773	15.8226	18.3408	21.6586	25.4347	29.7915	34.8688	41.8359	51.9911	64.4145	84.4145	120.627
0.496094	1.01016	1.49693	2.03575	2.7275	3.38563	4.19083	5.05918	6.20085	7.37676	8.7044	10.1884	12.0055	14.0547	15.8256	18.354	21.6602	25.5245	29.8173	35.2177	41.8695	51.9957	64.4996	85.1132	121.619
0.496094	1.01136	1.49693	2.04642	2.73525	3.41884	4.19083	5.05947	6.20613	7.37814	8.71666	10.1972	12.0205	14.0776	15.8759	18.3761	21.6607	25.6518	29.9617	35.3269	41.9454	52.1637	64.5667	85.3051	121.837
0.496094	1.01433	1.50053	2.05034	2.73775	3.42276	4.21245	5.08222	6.2152	7.37919	8.72853	10.2332	12.0686	14.0776	15.8827	18.4061	21.6744	25.6879	29.9973	35.3843	41.9663	52.1928	64.6819	86.0783	121.937
0.496094	1.01467	1.50321	2.05121	2.73977	3.42438	4.21245	5.09124	6.21604	7.38691	8.73893	10.3037	12.0748	14.0986	15.8862	18.4563	21.682	25.7517	30.0134	35.4117	41.9867	52.1992	64.7002	86.6673	122.29
0.496094	1.01467	1.51491	2.06028	2.74077	3.42762	4.23396	5.10091	6.22098	7.41457	8.74245	10.3291	12.1048	14.1477	15.999	18.4703	21.7063	25.8552	30.0597	35.4387	41.9929	52.2818	64.7379	86.8212	123.352
0.499562	1.01467	1.5179	2.06679	2.74411	3.42769	4.25366	5.10502	6.30325	7.42579	8.74745	10.3414	12.1187	14.167	16.0287	18.498	21.9207	25.9014	30.173	35.4449	42.0416	52.3075	64.9263	87.8386	124.035
0.502695	1.01467	1.53012	2.07127	2.7504	3.43066	4.25531	5.1076	6.31424	7.47962	8.75642	10.3422	12.1269	14.1761	16.1021	18.5076	21.9775	26.0101	30.1873	35.4677	42.148	52.3666	64.9436	87.9051	127.478
0.503997	1.01467	1.53221	2.08854	2.75141	3.44531	4.25572	5.13217	6.32588	7.48837	8.76761	10.366	12.1277	14.1875	16.1082	18.5732	22.0384	26.022	30.2017	35.4793	42.1709	52.457	65.1405	87.9056	134.065
0.504146	1.01467	1.53753	2.0954	2.76654	3.45316	4.26166	5.15754	6.32705	7.49155	8.76982	10.3825	12.1765	14.199	16.1226	18.5894	22.1221	26.1601	30.2737	35.6682	42.1804	52.6664	65.1568	88.259	135.39
0.504798	1.01467	1.5376	2.0985	2.77007	3.45864	4.26502	5.17382	6.3553	7.49678	8.77126	10.3919	12.2011	14.2054	16.1622	18.6428	22.1764	26.178	30.5258	35.6901	42.2864	52.6885	65.2265	88.3513	136.186
0.505865	1.01467	1.54356	2.10263	2.78086	3.46957	4.28656	5.18252	6.38144	7.51292	8.79614	10.41	12.2141	14.2584	16.1843	18.6582	22.2072	26.2041	30.5731	35.7073	42.6103	52.7401	65.3596	88.7237	136.765
0.50679	1.01467	1.55643	2.11687	2.78423	3.47806	4.29438	5.19152	6.38897	7.6229	8.79782	10.4293	12.3312	14.2626	16.1904	18.7137	22.2421	26.2387	30.6355	35.7342	42.6341	52.8007	65.57	88.8966	136.906
0.506926	1.01467	1.55643	2.11698	2.8059	3.48975	4.2979	5.19167	6.39503	7.65237	8.81139	10.4427	12.3337	14.2687	16.2178	18.8725	22.2463	26.3187	30.7348	35.7496	42.7134	52.8162	65.6079	88.9252	137.2
0.512483	1.01467	1.55643	2.11698	2.8059	3.49409	4.30488	5.23045	6.39844	7.65664	8.82428	10.4667	12.3396	14.2772	16.3479	18.9178	22.2535	26.3304	30.7627	35.8397	42.8267	53.0268	65.6355	89.4797	137.521
0.515668	1.01467	1.55643	2.11698	2.80997	3.52353	4.30488	5.23886	6.40317	7.66455	8.83276	10.474	12.3661	14.2837	16.3759	18.9345	22.3648	26.336	30.7628	35.8664	42.9792	53.0506	65.9955	89.9913	139.917
0.51573	1.01613	1.55953	2.11986	2.81468	3.53005	4.32453	5.26187	6.43596	7.67828	8.88529	10.5372	12.4053	14.2865	16.42	18.9367	22.4108	26.3553	30.8387	35.9344	43.0392	53.2232	66.0018	90.1882	139.989
0.516226	1.02218	1.56213	2.1318	2.84461	3.53583	4.33195	5.26203	6.46314	7.72358	8.88928	10.5587	12.4087	14.3178	16.422	18.9735	22.4432	26.3558	30.91	35.9574	43.0523	53.4614	66.1264	90.268	142.828
0.516472	1.02272	1.56461	2.13315	2.84705	3.54079	4.33905	5.26402	6.47596	7.73376	8.89008	10.5706	12.4096	14.3196	16.4492	19.0804	22.5334	26.37	30.9528	35.9795	43.1922	53.5287	66.1956	90.5789	144.154
0.517386	1.02757	1.5652	2.14462	2.85159	3.54921	4.34694	5.28342	6.48114	7.73957	8.89194	10.5849	12.4758	14.3369	16.4588	19.0974	22.5401	26.4594	30.9621	36.0122	43.3691	53.6067	66.2778	90.8383	145.465
0.518523	1.0318	1.57195	2.145	2.85311	3.54958	4.35154	5.28716	6.48406	7.75497	8.91866	10.6277	12.5772	14.3436	16.4937	19.1257	22.6433	26.5061	31.0505	36.0155	43.5958	53.7843	66.3381	91.0005	146.637
0.519964	1.03825	1.57577	2.14851	2.86753	3.55149	4.35384	5.31553	6.48411	7.75534	8.92973	10.6476	12.6685	14.3546	16.5654	19.1573	22.6996	26.5538	31.0653	36.1498	43.7535	53.8353	66.8384	91.1046	147.337
0.521024	1.04406	1.57577	2.15244	2.869	3.56986	4.36079	5.31867	6.49706	7.81711	8.94442	10.67	12.6835	14.425	16.578	19.1751	22.7163	26.6694	31.2188	36.3248	43.8137	53.867	66.8581	91.3235	148.63
0.521846	1.04409	1.57577	2.16954	2.8806	3.56993	4.36079	5.34546	6.49816	7.84485	8.95803	10.6742	12.801	14.4316	16.6004	19.3305	22.7332	26.6951	31.2756	36.3639	43.8579	53.8677	67.0668	91.8607	153.173
0.527394	1.04409	1.57577	2.19536	2.88312	3.5783	4.37678	5.38117	6.50871	7.85536	8.96805	10.7168	12.8051	14.4556	16.6464	19.3438	22.9633	26.7332	31.2893	36.4433	43.9027	54.2818	67.1777	91.8823	155.956
0.527766	1.04409	1.57577	2.20113	2.8927	3.58958	4.38891	5.38961	6.56766	7.87157	8.96872	10.7363	12.8635	14.4626	16.6487	19.347	23.0858	26.8074	31.2902	36.4825	43.9396	54.5135	67.4152	92.095	157.228
0.531139	1.04409	1.57577	2.21484	2.89743	3.59033	4.39321	5.39691	6.62979	7.87359	9.03207	10.8281	12.8662	14.5051	16.68	19.3569	23.1482	26.8281	31.301	36.509	44.0343	54.5719	67.4783	92.2855	157.633
0.531313	1.04409	1.57577	2.23946	2.89901	3.59536	4.3954	5.41965	6.64166	7.88777	9.04864	10.8292	12.8836	14.5589	16.7054	19.379	23.1556	26.8499	31.3532	36.607	44.0535	55.067	67.5042	92.3793	157.668
0.533736	1.04594	1.58812	2.25691	2.90365	3.62782	4.39798	5.43839	6.65524	7.89475	9.06339	10.8515	12.8959	14.5906	16.8176	19.5012	23.2001	26.8513	31.4433	36.7708	44.2422	55.4323	67.6758	92.4751	158.145
0.534674	1.04844	1.59833	2.25707	2.9049	3.63353	4.39982	5.44009	6.6558	7.89661	9.07104	10.8524	12.9193	14.5912	16.821	19.5374	23.2285	26.8969	31.4586	36.7946	44.2921	55.4881	67.9081	92.7078	158.764
0.535061	1.04871	1.60581	2.26335	2.90824	3.64177	4.40157	5.45486	6.66162	7.90808	9.07883	10.8524	12.9648	14.6276	16.8227	19.6135	23.2321	26.9492	31.6345	36.8205	44.2955	55.5087	67.9346	92.716	159.622
0.535102	1.04945	1.61198	2.26887	2.91459	3.65426	4.40226	5.45989	6.67531	7.91421	9.10523	10.853	12.9864	14.6684	16.8338	19.7377	23.2382	27.0177	31.7012	36.8738	44.5865	55.6324	67.9664	92.8364	160.103
0.543035	1.04976	1.6125	2.26887	2.91689	3.65559	4.41478	5.46475	6.69447	7.92483	9.13535	10.8728	13.0638	14.6914	16.8398	19.8197	23.2448	27.0314	31.7719	36.9404	44.5933	55.6439	67.9905	93.1999	161.453
0.544628	1.05076	1.62141	2.26887	2.91763	3.65732	4.41822	5.46782	6.70186	7.92483	9.15822	10.8733	13.0669	14.7178	16.8524	19.8825	23.2947	27.1424	31.8114	37.071	44.6519	55.8047	68.0417	93.2011	161.684
0.546785	1.05108	1.62263	2.26887	2.9207	3.65845	4.44966	5.47612	6.70281	7.94122	9.20407	10.8902	13.0858	14.7396	16.8573	19.8912	23.3452	27.1792	31.8537	37.0978	45.0462	55.8638	68.5943	93.3254	162.189
0.548184	1.05237	1.63767	2.27168	2.92226	3.66272	4.4524	5.50282	6.70997	7.94958	9.20583	10.891	13.1071	14.7437	16.864	19.9398	23.3691	27.1875	31.8643	37.1722	45.0613	55.9914	68.6041	93.547	162.217
0.548482	1.05237	1.64195	2.27326	2.92305	3.66893	4.46185	5.51321	6.7135	7.97055	9.22788	10.9006	13.1194	14.7738	16.869	19.9525	23.4022	27.2943	31.8863	37.2011	45.1111	56.118	68.6884	94.1511	162.299
0.549432	1.05463	1.64766	2.27854	2.92682	3.67746	4.46602	5.52347	6.72315	7.98224	9.27141	10.9843	13.1539	14.8658	16.8794	19.9803	23.4083	27.301	31.9049	37.3267	45.2365	56.3563	68.6922	94.532	163.495
0.550282	1.05542	1.64888	2.28996	2.93555	3.69141	4.47173	5.54426	6.72843	7.98416	9.28327	10.9987	13.1655	14.8678	16.9054	19.9992	23.4139	27.3819	31.9249	37.3429	45.3093	56.7474	68.8953	94.6431	163.63
0.550282	1.06079	1.64988	2.29061	2.93869	3.69141	4.47173	5.54456	6.74916	7.98573	9.33724	11.0175	13.1889	14.8678	17.0217	20.0366	23.5535	27.3999	32.0667	37.3688	45.4337	56.9121	69.02	94.6562	163.833
0.550282	1.066	1.65085	2.29148	2.9504	3.70385	4.47253	5.55833	6.7575	8.00033	9.3554	11.1483	13.2122	14.8739	17.0358	20.0702	23.5819	27.4887	32.0855	37.3861	45.4468	57.2405	69.0578	94.9785	163.93
0.550282	1.07331	1.65085	2.30083	2.95515	3.72407	4.4759	5.58181	6.7575	8.01223	9.41932	11.2306	13.218	14.9116	17.0374	20.0811	23.7141	27.5141	32.1034	37.3998	45.5639	57.2797	69.2154	95.165	164.426
0.550282	1.07541	1.65085	2.32196	2.96336	3.73853	4.49019	5.58379	6.76132	8.01223	9.46209	11.2329	13.2526	14.9353	17.0491	20.136	23.74	27.64	32.2044	37.4839	45.5895	57.6012	69.5122	95.6954	164.949
0.550282	1.07719	1.65522	2.32401	2.97017	3.74661	4.49813	5.59756	6.77036	8.01307	9.48432	11.2539	13.2676	14.9557	17.1062	20.1398	23.7453	27.6703	32.2085	37.6973	45.6137	57.6235	69.5345	95.773	167.211
0.550282	1.07767	1.66395	2.3326	2.97781	3.76375	4.50454	5.61273	6.78137	8.01464	9.50386	11.2804	13.2792	14.9693	17.1384	20.1572	23.8601	27.6836	32.2451	37.7179	45.7327	57.6459	69.6222	96.2739	169.488
0.550282	1.07933	1.67697	2.33443	2.97816	3.77645	4.51816	5.61955	6.80664	8.03488	9.54332	11.2848	13.3083	15.0299	17.1818	20.1767	23.9188	27.738	32.4069	37.7224	46.1326	58.0453	69.6663	96.6071	169.557
0.550282	1.07954	1.68634	2.33465	2.99386	3.77928	4.52835	5.62617	6.84231	8.04793	9.5695	11.3123	13.3183	15.1082	17.2178	20.1859	23.9926	27.7528	32.4335	37.7246	46.1831	58.0562	69.7284	96.6318	181.452
0.550282	1.08303	1.68794	2.33465	2.99386	3.78453	4.53064	5.62694	6.85487	8.07249	9.57949	11.331	13.3209	15.1144	17.2397	20.2139	24.0165	27.8203	32.4787	37.7375	46.2576	58.4866	69.7853	96.8838	184.966
0.550282	1.0835	1.68865	2.33872	2.99551	3.78627	4.57041	5.63868	6.85538	8.081	9.58503	11.341	13.3509	15.139	17.2606	20.2328	24.0799	27.8376	32.5524	37.7385	46.4361	58.4948	69.953	96.9319	187.297
0.550282	1.08844	1.69475	2.33885	3.00193	3.79764	4.57225	5.64843	6.8835	8.08591	9.5929	11.355	13.3577	15.2039	17.2845	20.2448	24.081	27.8546	32.5643	37.7529	46.612	58.6865	70.1022	97.222	187.665
0.550282	1.09312	1.69889	2.34116	3.00396	3.79801	4.58844	5.66016	6.89502	8.11321	9.59585	11.363	13.366	15.2281	17.3278	20.2556	24.082	27.8619	32.6912	37.7816	46.7817	58.7327	70.1219	97.3269	188.492
0.550282	1.0939	1.70193	2.34203	3.00396	3.80021	4.60049	5.6655	6.90173	8.12109	9.59766	11.3846	13.4341	15.234	17.3612	20.2662	24.1027	27.8918	32.7785	37.7968	46.8199	59.0237	70.1281	97.872	188.872
0.550282	1.09698	1.70217	2.36608	3.01845	3.81018	4.63138	5.6655	6.90818	8.12482	9.60081	11.4209	13.4385	15.2495	17.3976	20.3543	24.1184	27.895	32.8252	37.9845	46.8283	59.1204	70.1384	98.2666
0.550282	1.09735	1.70345	2.37251	3.02825	3.81497	4.65613	5.69966	6.90979	8.12984	9.61027	11.516	13.4437	15.2581	17.4272	20.368	24.1546	27.9968	32.8588	38.1167	46.8835	59.1582	70.3897	98.2885
0.550282	1.10056	1.70809	2.38729	3.03735	3.82451	4.66038	5.70323	6.91547	8.13123	9.67184	11.5217	13.4649	15.2598	17.507	20.3922	24.2083	28.0005	32.8918	38.3401	46.9566	59.2596	70.3916	98.4281
0.550282	1.10056	1.7114	2.39278	3.04401	3.82713	4.67759	5.70596	6.92762	8.14007	9.68559	11.5622	13.477	15.2961	17.5159	20.4346	24.2306	28.0547	32.9591	38.3725	47.0079	59.2693	70.4447	98.8312
0.550282	1.10056	1.71145	2.39463	3.04433	3.83441	4.6966	5.7081	6.93006	8.14715	9.68559	11.569	13.5092	15.3091	17.5463	20.522	24.2837	28.059	33.0096	38.3756	47.0606	59.3973	70.4555	98.921
0.550282	1.10056	1.72985	2.40326	3.04911	3.83564	4.69665	5.72264	6.93443	8.15486	9.68911	11.5768	13.5231	15.3548	17.595	20.5276	24.307	28.0688	33.0155	38.3798	47.0811	59.5126	70.6216	99.1694
0.550282	1.10056	1.73011	2.41125	3.04957	3.845	4.7	5.72781	6.93647	8.16518	9.72144	11.588	13.5374	15.3604	17.6587	20.5346	24.3177	28.1193	33.0664	38.3937	47.1035	59.557	70.769	99.1921
0.550282	1.10056	1.73569	2.4173	3.06071	3.85161	4.72213	5.74176	6.98947	8.18816	9.7322	11.6236	13.5374	15.3737	17.7367	20.5396	24.3492	28.1715	33.0884	38.5237	47.1054	59.6147	71.2844	100.037
0.550282	1.10056	1.73917	2.41881	3.06817	3.85204	4.73039	5.75193	6.99931	8.19163	9.74211	11.6707	13.5542	15.4539	17.7907	20.5604	24.355	28.1743	33.1286	38.7119	47.164	59.6542	71.5045	100.072
0.550282	1.10056	1.74015	2.42374	3.06828	3.85224	4.73411	5.76091	7.01583	8.20046	9.74973	11.6879	13.5776	15.455	17.8105	20.6629	24.3711	28.1782	33.1579	38.7618	47.1692	59.6872	71.6199	100.34
0.550282	1.10056	1.74015	2.4362	3.08157	3.85598	4.7344	5.7854	7.01772	8.20057	9.7975	11.69	13.5887	15.5111	17.8375	20.6782	24.6177	28.2177	33.2937	38.79	47.2463	59.8023	71.8935	100.43
0.550282	1.10056	1.74015	2.43903	3.08355	3.85763	4.73706	5.79175	7.03306	8.20293	9.81001	11.7224	13.6132	15.5342	17.8487	20.7613	24.6512	28.2502	33.3292	38.8454	47.3619	59.8468	71.9871	100.715
0.550282	1.10056	1.74015	2.4447	3.08355	3.86059	4.73821	5.79764	7.03845	8.21933	9.81083	11.7319	13.6223	15.5987	17.8876	20.7932	24.7113	28.3169	33.3865	38.8978	47.3946	59.8477	72.2946	100.716
0.550282	1.10056	1.74015	2.45009	3.10802	3.86235	4.75405	5.81033	7.03845	8.2318	9.81275	11.735	13.6629	15.6357	17.8888	20.8176	24.7115	28.3349	33.4995	39.0658	47.4799	59.8651	72.5188	100.716
0.550282	1.10056	1.74015	2.45266	3.10802	3.86901	4.77259	5.83148	7.04044	8.24474	9.82609	11.7411	13.7182	15.6592	17.9299	20.8221	24.759	28.456	33.5735	39.0698	47.5159	59.8772	72.9136	101.634
0.550282	1.10222	1.74182	2.45782	3.11528	3.88108	4.77695	5.83276	7.05097	8.24546	9.83605	11.7625	13.7213	15.6656	17.9514	20.9758	24.7996	28.7113	33.5811	39.2747	47.6895	60.0601	73.1197	101.677
0.550282	1.10344	1.74433	2.45837	3.12105	3.89108	4.78348	5.84958	7.06926	8.24751	9.8714	11.7633	13.7571	15.6707	17.9648	21.0331	24.8283	28.7312	33.5995	39.3684	47.7795	60.2251	73.5059	102.214
0.550282	1.10356	1.74948	2.45843	3.1285	3.90672	4.78532	5.84958	7.08097	8.25437	9.87837	11.77	13.7615	15.6992	18.0069	21.1328	24.8883	28.7449	33.6388	39.4203	47.7828	60.3306	73.6988	103.035
0.550282	1.10903	1.75037	2.46005	3.13763	3.91529	4.79058	5.87025	7.09523	8.2583	9.8874	11.7963	13.7681	15.7385	18.0581	21.1763	24.8933	28.8098	33.6538	39.5462	48.0387	60.3497	74.0534	103.037
0.550282	1.1093	1.75083	2.47321	3.14352	3.91802	4.8166	5.90625	7.09663	8.28978	9.89897	11.8052	13.7715	15.752	18.0707	21.2643	24.9776	28.8258	33.745	39.5714	48.0387	60.3762	74.1366	103.057
0.550282	1.1093	1.7571	2.47722	3.15154	3.91816	4.82721	5.93715	7.09831	8.29342	9.93256	11.8517	13.8374	15.7577	18.1051	21.3151	24.9981	28.8471	33.7723	39.5799	48.1049	60.514	74.1433	103.081
0.550282	1.1093	1.76545	2.48047	3.15777	3.92746	4.83498	5.95221	7.10773	8.29735	9.93256	11.8765	13.8747	15.7661	18.1092	21.3322	25.0049	28.9464	33.794	39.6445	48.2016	60.621	74.4141	103.126
0.550282	1.1093	1.76992	2.48128	3.17154	3.92871	4.83595	5.9573	7.11413	8.31592	9.93507	11.8866	13.9473	15.8133	18.1199	21.4229	25.0468	28.9621	33.9118	39.7685	48.3153	60.6555	74.889	103.272
0.550388	1.11012	1.77461	2.48661	3.18148	3.93897	4.84239	5.96164	7.12653	8.31975	9.97211	11.9044	13.9621	15.821	18.2922	21.4576	25.0896	29.2945	34.0731	39.7839	48.402	60.8409	74.9678	103.298
0.553295	1.11453	1.78171	2.49284	3.18428	3.94599	4.85373	5.96757	7.12719	8.32128	9.98458	11.9227	13.9635	15.8226	18.3688	21.6227	25.0983	29.3462	34.15	39.8801	48.483	60.889	75.1493	103.573
0.553301	1.11479	1.78237	2.49671	3.19402	3.97609	4.85378	5.98511	7.15145	8.37081	9.98724	11.9269	13.9653	15.8226	18.3765	21.7681	25.1325	29.3559	34.2575	39.9431	48.5895	61.0035	75.2134	103.575
0.55465	1.1199	1.79159	2.4997	3.19443	3.99932	4.87063	5.99945	7.15606	8.3997	9.99165	11.9273	14.0062	15.8363	18.3893	21.7692	25.1597	29.3668	34.2661	39.9751	48.8882	61.062	75.9669	104.109
0.55465	1.12639	1.79159	2.49988	3.19548	4.00732	4.87248	6.00486	7.16851	8.4177	9.99321	11.9476	14.0103	15.8706	18.4545	21.8247	25.2381	29.4174	34.3599	39.9828	48.9132	61.2066	76.2545	104.117
0.55465	1.13304	1.79159	2.50967	3.19922	4.02908	4.87357	6.00791	7.1748	8.44205	10.0538	11.9827	14.0151	15.8712	18.6209	21.9065	25.2466	29.5082	34.3684	40.0653	48.9135	61.3134	76.4037	104.854
0.55465	1.13594	1.79463	2.52339	3.20816	4.03624	4.87891	6.01731	7.1748	8.45718	10.0787	12.0007	14.0185	15.8871	18.6384	21.9525	25.2914	29.5338	34.4509	40.0967	48.9949	61.5928	76.4211	105.988
0.55465	1.13749	1.80356	2.53369	3.20867	4.0376	4.89127	6.05272	7.19685	8.4615	10.0928	12.0183	14.0295	15.9411	18.6481	21.9595	25.2959	29.5742	34.452	40.1728	49.1309	61.6365	76.8773	106.816
0.55465	1.13867	1.80411	2.53369	3.21074	4.03941	4.89225	6.08035	7.19994	8.46725	10.1336	12.1041	14.0295	15.9473	18.6731	22.0023	25.336	29.5815	34.5167	40.3007	49.3281	61.6577	76.8979	107.77
0.55465	1.13916	1.80581	2.53369	3.21376	4.04236	4.90995	6.08481	7.20429	8.48577	10.1337	12.1187	14.0331	15.9519	18.7107	22.0178	25.3489	29.5825	34.5812	40.4091	49.3489	61.7872	77.1234	108.036
0.55465	1.14291	1.80622	2.54473	3.22461	4.04762	4.92384	6.08802	7.20991	8.4948	10.1377	12.1321	14.0514	15.9643	18.7813	22.1478	25.5274	29.6081	34.6199	40.6643	49.6565	61.7891	77.5976	108.205
0.55465	1.14425	1.80679	2.5538	3.23568	4.05868	4.92426	6.09299	7.21045	8.51236	10.1457	12.1568	14.0534	15.9795	18.8068	22.159	25.5344	29.7552	34.6741	40.668	49.7391	61.9114	78.0012	108.376
0.55465	1.14858	1.81011	2.55468	3.23686	4.08139	4.94642	6.12631	7.23783	8.54268	10.1729	12.1624	14.0603	16.0066	18.8119	22.2011	25.5369	29.7599	34.7298	40.7491	50.1259	61.9134	78.0812	108.454
0.55465	1.15969	1.81559	2.56669	3.23916	4.08215	4.95094	6.13019	7.25818	8.58271	10.1964	12.1875	14.0776	16.0115	18.8209	22.2085	25.687	29.7642	34.7486	40.8738	50.2279	62.0298	78.8054	108.591
0.55465	1.15993	1.81779	2.56929	3.24132	4.09024	4.96678	6.15234	7.28989	8.60484	10.2079	12.2709	14.0876	16.0237	18.8555	22.2151	25.7414	29.8375	34.7519	41.0426	50.5332	62.0898	78.8703	109.828
0.55465	1.16074	1.81798	2.57176	3.26271	4.09089	4.98302	6.15278	7.30861	8.62148	10.2756	12.2818	14.0948	16.0584	18.8627	22.2199	25.7981	29.9398	34.7629	41.1683	50.7465	62.1254	78.99	109.904
0.556013	1.16114	1.83867	2.58491	3.27284	4.10494	4.9846	6.18372	7.32388	8.62654	10.3148	12.3047	14.1561	16.0584	18.8763	22.285	25.8114	29.9511	34.957	41.2066	50.8766	62.2111	79.1998	110.288
0.561315	1.16424	1.84691	2.58721	3.27731	4.14428	4.99346	6.20117	7.33803	8.63291	10.326	12.3089	14.2609	16.0767	18.9045	22.298	25.8387	29.9629	34.9764	41.2227	50.9757	62.2695	79.3087	110.83
0.561827	1.17555	1.84755	2.58816	3.2833	4.21245	4.99777	6.23642	7.33891	8.6781	10.3414	12.3145	14.2676	16.1843	18.9152	22.3032	25.9571	29.9961	35.0651	41.3555	51.1792	62.3278	79.7587	110.91
0.561849	1.18302	1.8515	2.5891	3.29001	4.2168	5.00054	6.23732	7.34168	8.72406	10.3506	12.3661	14.3073	16.1843	18.9686	22.3104	25.9728	29.9962	35.1018	41.4602	51.1859	62.3337	79.9445	111.063
0.563952	1.18314	1.85274	2.59015	3.29179	4.21997	5.00416	6.24436	7.34168	8.73735	10.374	12.3778	14.308	16.1843	18.9874	22.3134	26.0228	30.0295	35.1372	41.4624	51.2188	62.3605	80.1654	111.331
0.568251	1.18597	1.85352	2.59238	3.29273	4.22771	5.0043	6.2582	7.3776	8.74247	10.3805	12.3856	14.3086	16.2067	18.9891	22.3159	26.0732	30.0751	35.158	41.4958	51.3945	62.4908	80.2326	111.706
0.568988	1.18773	1.86324	2.59719	3.30053	4.24423	5.01214	6.26042	7.40656	8.79419	10.4052	12.3877	14.3131	16.2185	19.0176	22.3466	26.1036	30.2214	35.1947	41.5804	51.5991	62.5098	80.3039	111.733
0.570148	1.18948	1.87152	2.60865	3.30169	4.26756	5.02081	6.26117	7.41468	8.79563	10.464	12.393	14.3341	16.2425	19.0427	22.3747	26.1487	30.2495	35.2182	41.6696	51.8064	62.5806	80.5885	111.996
0.570222	1.19195	1.87419	2.61207	3.30274	4.27409	5.04193	6.26141	7.42041	8.79803	10.4929	12.4442	14.3649	16.2514	19.0639	22.433	26.1498	30.2753	35.2335	41.8031	51.8892	62.6027	81.1409	112.056
0.574109	1.1975	1.87419	2.61468	3.31085	4.30906	5.04942	6.26941	7.42042	8.80452	10.5021	12.4642	14.3749	16.2536	19.1179	22.449	26.2158	30.3105	35.2456	41.8325	51.9384	62.796	81.2614	112.52
0.577849	1.20062	1.87419	2.61987	3.31282	4.30966	5.08498	6.27418	7.42474	8.84427	10.5655	12.4676	14.3917	16.2968	19.126	22.4775	26.2768	30.3105	35.2551	42.1745	51.9566	62.8214	81.3559	112.83
0.577882	1.20178	1.87419	2.62672	3.33055	4.3114	5.09074	6.27418	7.43329	8.86108	10.5668	12.505	14.4001	16.3547	19.1542	22.4813	26.3006	30.3571	35.2656	42.1888	51.9685	62.8624	81.5406	112.84
0.578029	1.2094	1.87419	2.62987	3.33395	4.32853	5.11362	6.27513	7.4374	8.88418	10.602	12.5094	14.4086	16.399	19.1955	22.6396	26.3081	30.4055	35.2741	42.4146	52.005	63.0788	82.2064	112.879
0.579561	1.2096	1.87895	2.63677	3.34724	4.33195	5.15287	6.30788	7.45263	8.88641	10.6163	12.5484	14.4651	16.4107	19.1969	22.6887	26.3304	30.465	35.3021	42.5251	52.0585	63.1733	82.3818	113.049
0.581544	1.21537	1.88079	2.64775	3.34724	4.35363	5.16872	6.31733	7.48465	8.89349	10.6172	12.5484	14.4682	16.4119	19.1993	22.689	26.3582	30.4715	35.3836	42.5883	52.381	63.1867	83.1382	113.085
0.581685	1.21612	1.88255	2.64928	3.3484	4.35384	5.1764	6.322	7.49898	8.90756	10.6476	12.5649	14.4882	16.4429	19.2173	22.6907	26.3734	30.6345	35.4681	42.5958	52.5984	63.2461	83.1841	113.227
0.582428	1.22204	1.88314	2.65051	3.35601	4.35573	5.18555	6.32398	7.5013	8.95478	10.6508	12.5808	14.5017	16.4873	19.3305	22.7261	26.3883	30.7432	35.609	42.6696	52.6077	63.2863	83.2437	113.343
0.584469	1.2225	1.88599	2.65051	3.36171	4.36071	5.2188	6.35136	7.51001	8.95795	10.6545	12.648	14.5185	16.5069	19.3476	22.8256	26.3934	30.9431	35.6115	42.6829	52.7611	63.3899	83.251	113.408
0.585647	1.22326	1.8864	2.66041	3.38449	4.36755	5.22138	6.3631	7.51797	8.96064	10.6619	12.6627	14.5279	16.5599	19.3504	22.8308	26.395	30.9484	35.7137	42.7154	52.8427	63.3934	83.507	113.611
0.586778	1.22427	1.89179	2.66646	3.41231	4.36834	5.22592	6.37727	7.56749	8.99756	10.6968	12.6755	14.5383	16.5821	19.3853	22.8316	26.4713	30.9925	35.7209	42.8032	52.885	63.4552	83.557	113.81
0.587842	1.22674	1.89927	2.67155	3.41804	4.36864	5.22992	6.39078	7.57688	9.00779	10.7429	12.6834	14.5589	16.6638	19.3872	22.898	26.5317	31.099	35.7958	42.8867	52.9096	63.8825	83.8338	113.968
0.591621	1.23047	1.90248	2.67155	3.4183	4.37848	5.25826	6.40297	7.58113	9.03826	10.7642	12.6906	14.559	16.669	19.3978	22.9594	26.6678	31.1277	36.0361	42.9339	53.1694	63.9105	84.6652	114.337
0.591717	1.23047	1.90324	2.67155	3.42769	4.3884	5.27355	6.404	7.62012	9.0596	10.7654	12.711	14.5695	16.709	19.4149	22.9737	26.6809	31.1476	36.0681	43.0448	53.9776	63.9323	84.8577	114.626
0.591751	1.23047	1.90973	2.67155	3.42769	4.39214	5.30325	6.42118	7.63287	9.10879	10.8456	12.7162	14.6127	16.7298	19.4149	22.9842	26.6918	31.178	36.1204	43.0523	54.0516	63.94	84.9305	115.065
0.592989	1.23047	1.92205	2.67416	3.43052	4.39303	5.30609	6.42866	7.64782	9.16241	10.8599	12.7497	14.6875	16.7331	19.4601	23.0475	26.7016	31.181	36.1454	43.1001	54.0736	63.9564	84.9374	115.156
0.593739	1.23047	1.92205	2.682	3.43234	4.42647	5.31309	6.43396	7.69826	9.16282	10.8728	12.7637	14.7143	16.748	19.5631	23.0562	26.7428	31.1981	36.1748	43.1705	54.1039	64.5556	85.2894	116.157
0.594324	1.23114	1.92205	2.69962	3.44654	4.42845	5.31415	6.49739	7.70395	9.21787	10.8802	12.7888	14.7226	16.7871	19.5632	23.0699	26.7556	31.2612	36.2353	43.3712	54.1772	64.6271	85.4587	116.166
0.596147	1.23742	1.92268	2.70552	3.45409	4.43228	5.34116	6.50559	7.70642	9.21788	10.9394	12.7898	14.7324	16.8032	19.6151	23.0857	26.8451	31.2667	36.274	43.4229	54.3305	64.629	85.7682	116.895
0.596405	1.24022	1.92943	2.70652	3.45489	4.43652	5.34659	6.51502	7.72358	9.23654	10.9938	12.8014	14.7698	16.8077	19.6544	23.087	26.9757	31.4212	36.4202	43.4577	54.3355	64.6782	85.8963	117.672
0.597619	1.24023	1.93173	2.70703	3.45647	4.43652	5.37004	6.51907	7.73869	9.25094	11.0194	12.8051	14.7862	16.81	19.6829	23.189	27.0127	31.467	36.6861	43.6035	54.476	64.7269	85.9008	117.7
0.598392	1.24023	1.93485	2.70703	3.4801	4.45127	5.37751	6.53519	7.78493	9.2589	11.0381	12.869	14.8269	16.8617	19.7198	23.2029	27.082	31.5235	36.7262	43.6946	54.537	65.0342	86.0202	118.312
0.605262	1.24657	1.95641	2.70974	3.48339	4.45263	5.39127	6.55422	7.79779	9.28466	11.1318	12.8716	14.8601	16.881	19.7707	23.2499	27.1502	31.5246	36.7602	43.6974	54.8948	65.1181	86.832	118.846
0.605971	1.24902	1.96642	2.7222	3.48403	4.4563	5.39525	6.55444	7.83621	9.29888	11.1483	12.8935	14.8802	16.8964	19.7708	23.2553	27.1944	31.576	36.8438	43.7535	54.9721	65.1744	86.9213	119.85
0.606323	1.25366	1.9676	2.72524	3.48849	4.45911	5.41217	6.5684	7.83912	9.30738	11.1638	12.9066	14.8963	16.9153	19.785	23.2868	27.2478	31.593	36.9214	43.7777	55.071	65.2455	86.9375	120.559
0.609231	1.25484	1.97194	2.72596	3.50825	4.46485	5.4128	6.57738	7.859	9.36451	11.1715	12.9138	14.9014	16.9328	19.8438	23.377	27.2873	31.642	37.0493	43.8001	55.0753	65.6314	87.6222	120.993
0.611226	1.25484	1.97786	2.73014	3.52238	4.46844	5.42372	6.59397	7.86346	9.40323	11.1764	12.9182	14.9146	16.9965	19.964	23.3797	27.3001	31.7117	37.0549	44.3857	55.0976	65.7886	87.647	122.407
0.612189	1.25484	1.97936	2.7402	3.52541	4.49079	5.50282	6.59422	7.87884	9.40985	11.1794	12.968	14.9227	17.0862	20.0385	23.4255	27.4792	31.7913	37.1049	44.3947	55.1717	65.8543	87.7773	122.428
0.616015	1.26006	1.98407	2.74151	3.52606	4.49079	5.5218	6.59637	7.89037	9.41932	11.1937	13.036	14.945	17.1111	20.0536	23.4836	27.5219	31.8451	37.1158	44.533	55.1832	65.9697	87.8641	123.825
0.616403	1.26022	1.98407	2.74474	3.52954	4.49975	5.52735	6.62841	7.89849	9.41932	11.2089	13.043	14.9693	17.2002	20.0869	23.5889	27.5287	31.858	37.1309	44.5491	55.35	65.9848	87.933	125.045
0.620105	1.2648	1.98407	2.7453	3.53651	4.50214	5.53027	6.63504	7.9011	9.44609	11.2301	13.0736	14.9718	17.219	20.0986	23.6117	27.5433	31.9684	37.161	44.5966	55.4534	66.0615	87.9924	127.165
0.620117	1.2648	1.98407	2.74635	3.54271	4.51768	5.53199	6.64264	7.90775	9.46577	11.2472	13.1465	14.9951	17.2674	20.1087	23.6349	27.5615	32.081	37.1943	44.6065	55.4842	66.1565	88.5941	129.064
0.620117	1.26774	1.985	2.75141	3.54373	4.52438	5.54205	6.65679	7.92483	9.49935	11.2473	13.1539	15.0049	17.2792	20.1204	23.6425	27.5678	32.1312	37.1992	44.6891	55.6896	66.2338	88.657	130.182
0.621135	1.27479	1.99601	2.75141	3.55546	4.53187	5.58537	6.68828	7.92483	9.50782	11.331	13.1562	15.0067	17.3214	20.1406	23.7197	27.6054	32.1363	37.2277	44.7483	55.8025	66.2376	88.7605	130.297
0.621155	1.27594	1.99822	2.77325	3.5719	4.53929	5.58643	6.69883	7.92483	9.51055	11.3632	13.1577	15.0834	17.3335	20.2079	23.7417	27.6614	32.177	37.247	44.7895	55.8454	66.2573	88.9788	130.874
0.622787	1.27746	1.99982	2.77374	3.57263	4.56029	5.60081	6.70185	7.93628	9.55655	11.379	13.1688	15.0896	17.3523	20.2407	23.8098	27.7421	32.2857	37.2537	44.8011	55.872	66.313	89.088	131.092
0.623044	1.27825	1.99982	2.78274	3.58256	4.56029	5.60663	6.7254	7.94137	9.55655	11.3823	13.2014	15.1406	17.3771	20.2428	23.8495	27.763	32.2983	37.2582	44.8189	55.9673	66.4822	89.2869	131.627
0.623395	1.27945	2.00611	2.78423	3.58318	4.56379	5.61113	6.72933	7.98106	9.56262	11.39	13.2347	15.1563	17.4214	20.2472	23.8564	27.8457	32.305	37.3137	44.8221	56.024	66.5431	89.3224	132.578
0.623857	1.28005	2.01303	2.78423	3.58679	4.59919	5.6118	6.74126	8.00095	9.57522	11.4003	13.2437	15.1693	17.4659	20.283	23.8914	27.8478	32.3355	37.4291	44.8438	56.0384	66.6946	89.3303	133.011
0.624448	1.28155	2.01468	2.78423	3.59189	4.6042	5.62661	6.74204	8.01223	9.58503	11.407	13.2524	15.1802	17.516	20.3459	23.895	27.8766	32.4172	37.4957	44.8698	56.1407	67.0174	89.3351	134.73
0.625002	1.28162	2.01868	2.78423	3.6165	4.63014	5.62826	6.7575	8.04286	9.59335	11.4088	13.2526	15.2538	17.5487	20.348	23.9089	27.888	32.4228	37.5528	45.0882	56.2234	67.0993	89.6007	136.732
0.626574	1.28515	2.02868	2.78646	3.62156	4.63059	5.62972	6.76697	8.06988	9.59766	11.4162	13.2633	15.305	17.5674	20.3756	23.9429	27.896	32.4422	37.6326	45.0958	56.422	67.5176	89.7326	137.582
0.627643	1.28585	2.03008	2.78866	3.62541	4.63351	5.63368	6.77396	8.07248	9.64382	11.4415	13.3459	15.3073	17.5711	20.462	23.9736	27.8977	32.4588	37.6454	45.1129	56.5014	67.5307	90.068	140.2
0.629329	1.29066	2.03316	2.79164	3.63353	4.6339	5.64616	6.77819	8.07248	9.65154	11.4872	13.3644	15.3161	17.5912	20.5643	24.0088	27.9227	32.4629	37.7171	45.1916	56.5919	67.7295	90.0777	140.911
0.630149	1.29606	2.0373	2.79244	3.63755	4.63499	5.6554	6.78908	8.11694	9.68522	11.4902	13.3681	15.3425	17.6412	20.566	24.0626	27.9372	32.5357	37.7775	45.2814	56.6532	67.7978	90.0805	141.846
0.631365	1.29808	2.04533	2.80009	3.6376	4.64131	5.66016	6.79062	8.14715	9.69809	11.4904	13.3784	15.3544	17.7561	20.64	24.1218	27.9391	32.549	37.7933	45.4038	56.6835	68.0213	90.2109	142.488
0.632262	1.30163	2.04787	2.8059	3.64494	4.64451	5.6655	6.81123	8.18054	9.71458	11.493	13.3889	15.3809	17.7575	20.7012	24.2571	27.9579	32.641	37.7936	45.4102	56.8311	68.172	90.4079	142.889
0.634284	1.30471	2.05939	2.8059	3.65326	4.66873	5.6699	6.84185	8.18054	9.74482	11.5048	13.4172	15.4095	17.7768	20.7827	24.2973	27.992	32.6666	37.9577	45.4191	56.8455	68.2124	91.1166	145.371
0.634943	1.30966	2.06041	2.8059	3.65652	4.6693	5.68018	6.84623	8.19202	9.75103	11.5218	13.4245	15.4177	17.8056	20.8551	24.298	28.0133	32.67	38.0054	45.4535	56.9089	68.3171	91.3271	148.018
0.637522	1.31056	2.06247	2.81027	3.65845	4.68014	5.68152	6.89613	8.20379	9.75759	11.5351	13.4266	15.4467	17.8304	20.9157	24.3244	28.027	32.6849	38.0893	45.5825	56.9604	68.6193	91.3568	149.811
0.63815	1.31169	2.0635	2.81468	3.65845	4.68225	5.68484	6.90979	8.20993	9.77049	11.5448	13.515	15.455	17.8698	20.9172	24.4457	28.0567	32.7092	38.1436	45.8663	57.2539	68.6278	91.9851	149.917
0.638539	1.31242	2.06378	2.82478	3.65845	4.68225	5.68624	6.94116	8.21833	9.81979	11.5847	13.518	15.4934	17.9356	20.9945	24.5579	28.059	32.7278	38.1707	46.0274	57.5523	68.8089	92.1165	150.802
0.643387	1.31832	2.06418	2.82576	3.65936	4.68863	5.68652	6.96475	8.25276	9.83713	11.5865	13.5294	15.5214	18.0519	21.0153	24.6366	28.1043	32.7463	38.1858	46.2307	57.6663	68.8403	92.3941	151.143
0.644935	1.31896	2.06939	2.83261	3.66237	4.70415	5.69894	6.97783	8.25989	9.85521	11.6082	13.5498	15.5224	18.0581	21.036	24.6455	28.1167	32.8023	38.2116	46.3456	57.7608	68.9423	92.6823	151.526
0.645759	1.32393	2.08201	2.84091	3.69141	4.70604	5.69905	6.97866	8.27011	9.87526	11.6603	13.5553	15.5381	18.0797	21.0622	24.6949	28.1771	32.8088	38.2724	46.4363	57.7668	69.1062	92.951	152.084
0.650415	1.32445	2.08548	2.84242	3.69823	4.70646	5.70156	6.9953	8.27897	9.91371	11.6797	13.5594	15.5394	18.0817	21.0733	24.7321	28.1902	32.8448	38.3403	46.608	57.8141	69.2246	93.0153	153.358
0.653571	1.32526	2.09172	2.85417	3.6996	4.71817	5.70184	7.05135	8.30179	9.96604	11.6914	13.6007	15.5509	18.096	21.1249	24.7612	28.1994	32.9113	38.3512	46.6703	57.8718	69.3022	93.2326	154.361
0.654341	1.32611	2.10242	2.86166	3.70116	4.72731	5.70788	7.06813	8.30429	9.97213	11.7868	13.6123	15.5666	18.1346	21.1769	24.8449	28.2207	32.9113	38.3938	46.8186	58.0626	69.4983	93.3085	154.595
0.65521	1.33047	2.10246	2.86358	3.70948	4.73451	5.72399	7.12617	8.3351	9.98369	11.7889	13.6132	15.5777	18.1457	21.1843	24.8468	28.2214	32.9587	38.4009	46.889	58.1187	69.5993	93.4401	154.64
0.655247	1.33053	2.10263	2.86448	3.71306	4.75189	5.72399	7.13015	8.336	9.99756	11.8155	13.6352	15.6263	18.2188	21.2157	24.8474	28.3989	32.9609	38.5099	46.9601	58.1192	69.6658	93.702	154.856
0.656255	1.33206	2.10263	2.86518	3.71588	4.75211	5.72461	7.13455	8.33809	9.99909	11.8381	13.7108	15.6939	18.3136	21.2442	24.8703	28.4093	32.9665	38.6049	47.266	58.2208	69.8425	93.9275	156.184
0.657824	1.33369	2.10263	2.89396	3.728	4.75401	5.73819	7.15367	8.33821	10.0602	11.87	13.7268	15.7094	18.317	21.3158	24.9679	28.412	32.9665	38.6808	47.3243	58.3014	70.2885	94.203	156.228
0.658607	1.33518	2.10263	2.90193	3.73485	4.7746	5.74092	7.17291	8.39359	10.0884	11.873	13.7361	15.7144	18.3381	21.3406	24.9987	28.4558	33.0265	38.7857	47.3932	58.3574	70.3264	94.3791	156.609
0.659283	1.33577	2.10523	2.90331	3.74462	4.77828	5.74512	7.1748	8.40045	10.0898	11.8786	13.7592	15.7353	18.3555	21.3629	25.018	28.4898	33.0379	38.8127	47.7701	58.6026	70.5723	94.4324	157.206
0.659321	1.33801	2.11698	2.90716	3.74839	4.7889	5.76322	7.1748	8.41379	10.0951	11.8957	13.7747	15.7662	18.3835	21.365	25.024	28.6147	33.1579	38.8454	47.903	58.6556	70.6203	94.6193	157.323
0.665801	1.3511	2.11931	2.90762	3.75664	4.79819	5.76616	7.18745	8.41775	10.1329	11.9163	13.7894	15.8478	18.399	21.4056	25.0605	28.6177	33.2108	38.8888	48.235	58.701	70.7037	94.9017	157.927
0.666361	1.35175	2.11931	2.91047	3.76176	4.80016	5.76716	7.21747	8.42264	10.1441	11.92	13.7946	15.8643	18.4002	21.4213	25.1285	28.7674	33.2638	38.9202	48.3247	58.7706	70.9181	94.9236	158.132
0.666848	1.37068	2.12274	2.91259	3.76284	4.80424	5.76942	7.23783	8.44674	10.1883	11.9205	13.7998	15.8926	18.4689	21.4263	25.1324	28.8263	33.4049	39.0352	48.3673	58.785	71.0559	95.128	158.191
0.670448	1.3708	2.12496	2.91445	3.76451	4.80731	5.77815	7.27686	8.47832	10.2084	11.9274	13.8012	15.8961	18.4826	21.4771	25.152	28.9053	33.6438	39.1072	48.4801	58.7876	71.3655	95.4178	158.902
0.674146	1.37151	2.12929	2.91463	3.80067	4.80911	5.7799	7.30447	8.48577	10.2453	11.9387	13.8224	15.9069	18.5095	21.5024	25.1531	28.9629	33.7848	39.1953	48.5479	58.8905	71.3672	95.5608	158.955
0.674179	1.37556	2.13378	2.91752	3.81359	4.81134	5.7854	7.30604	8.50446	10.2717	11.9516	13.8558	15.9581	18.5107	21.513	25.1973	28.9702	33.8661	39.3091	48.6118	58.8905	71.5943	95.8503	159.439
0.675519	1.37769	2.13378	2.92114	3.81824	4.8145	5.78672	7.31168	8.53216	10.2801	12.0333	13.868	15.9582	18.5594	21.5185	25.2857	29.0401	33.9034	39.3288	48.6245	59.0553	71.6408	95.9807	159.527
0.676389	1.38613	2.13378	2.9352	3.822	4.81534	5.80802	7.34106	8.54268	10.2817	12.1056	13.8689	15.9686	18.7305	21.5266	25.319	29.0479	33.9606	39.3665	48.6509	59.1368	71.7569	96.0147	161.191
0.677545	1.39212	2.14054	2.93628	3.82437	4.81671	5.83403	7.34286	8.54268	10.3013	12.1121	13.9128	15.9706	18.7419	21.588	25.325	29.0557	34.2283	39.3849	48.7942	59.3168	71.7873	96.4804	161.73
0.677679	1.39717	2.14271	2.95705	3.83232	4.81994	5.83403	7.37073	8.55566	10.3261	12.1225	13.9128	16.0285	18.7993	21.6479	25.331	29.0691	34.2886	39.438	48.7998	59.3532	71.8353	96.9263	161.741
0.679593	1.39939	2.14629	2.95798	3.85004	4.82905	5.87965	7.38281	8.5757	10.3748	12.127	13.9642	16.029	18.8354	21.6885	25.3718	29.1315	34.314	39.4401	48.8951	59.4636	71.8783	96.9686	175.139
0.681532	1.40395	2.15485	2.95921	3.85072	4.83498	5.89774	7.38691	8.60144	10.3827	12.1607	14.0258	16.0641	18.8662	21.7057	25.3736	29.165	34.3396	39.5702	48.9999	59.4973	72.6137	97.0599	178.846
0.684667	1.40425	2.15642	2.95953	3.8793	4.84926	5.9165	7.38691	8.60853	10.3869	12.181	14.0446	16.0944	18.8779	21.7716	25.4029	29.1756	34.3426	39.5722	49.4798	59.6933	72.7754	97.2802	180.504
0.688888	1.40545	2.15726	2.96172	3.88212	4.85158	5.92224	7.3922	8.61171	10.3904	12.2183	14.0613	16.1411	18.8853	21.7783	25.4173	29.1857	34.3883	39.657	49.6037	59.8492	72.8142	97.7513	181.919
0.688989	1.40756	2.16456	2.96212	3.89846	4.85373	5.93128	7.40329	8.65325	10.4089	12.2206	14.0837	16.1708	18.8881	21.804	25.5069	29.2644	34.3981	39.6944	49.6831	59.895	72.9654	97.8119	182.208
0.689246	1.41971	2.16927	2.96336	3.89871	4.88738	5.93519	7.44001	8.6546	10.4256	12.248	14.0877	16.248	18.9867	21.9086	25.5182	29.2976	34.4172	39.8254	49.8885	59.9303	73.0894	98.0583	183.113
0.690392	1.42028	2.17022	2.96336	3.90924	4.88831	5.93732	7.44116	8.65537	10.4347	12.248	14.1186	16.2664	19.0512	21.9138	25.5247	29.4907	34.4208	39.9916	49.8988	60.0655	73.7317	98.4572	183.286
0.691376	1.42218	2.17128	2.96415	3.90933	4.89103	5.95221	7.45072	8.67063	10.4409	12.2591	14.1523	16.2887	19.0632	21.9433	25.5333	29.5287	34.4252	40.0657	49.9031	60.0834	73.9122	98.714
0.691899	1.42577	2.1716	2.96478	3.94606	4.90537	5.96393	7.45113	8.67801	10.4438	12.2607	14.2246	16.311	19.0636	22.0122	25.6059	29.6456	34.4381	40.2038	50.0004	60.1194	74.1369	98.965
0.692974	1.42714	2.17194	2.97958	3.95418	4.91613	5.97411	7.46205	8.70073	10.4467	12.2637	14.2321	16.3129	19.0773	22.0584	25.6102	29.6998	34.5144	40.6024	50.0956	60.3231	74.7299	99.5205
0.696058	1.42769	2.17585	2.97967	3.95815	4.94225	5.98164	7.48041	8.72534	10.4558	12.273	14.2416	16.3372	19.0782	22.0895	25.6223	29.7599	34.5242	40.7116	50.1456	60.3739	74.8178	99.6692
0.696058	1.42843	2.18169	2.98627	3.96118	4.9438	5.99298	7.48465	8.75363	10.4753	12.2982	14.2721	16.3786	19.0858	22.1652	25.6294	29.7673	34.7132	40.8027	50.3199	60.4254	74.8384	99.6756
0.696058	1.43225	2.18698	2.98905	3.96709	4.95254	6.02546	7.50081	8.76841	10.4929	12.3268	14.3073	16.381	19.0916	22.1671	25.6363	29.8227	34.8053	40.8563	50.3486	60.5333	75.0013	100.039
0.696058	1.43236	2.19609	3.00396	3.96814	4.97225	6.03329	7.50738	8.79391	10.5218	12.3641	14.3107	16.3925	19.0954	22.1762	25.638	29.8484	34.8279	40.93	50.672	60.5396	75.3352	100.154
0.696058	1.43468	2.19898	3.00531	3.97129	4.98168	6.04034	7.52603	8.87645	10.5401	12.4104	14.3245	16.3983	19.143	22.2137	25.6684	29.9326	34.8507	41.0984	50.6807	60.6061	75.4204	100.255
0.696058	1.43489	2.19959	3.01098	3.97577	4.99664	6.0522	7.53582	8.87645	10.5513	12.4324	14.3567	16.423	19.1761	22.3458	25.6856	29.9881	34.8602	41.1013	50.9695	60.6555	75.6665	100.414
0.696058	1.43496	2.20113	3.031	3.98913	4.99984	6.05282	7.5491	8.90728	10.5567	12.4952	14.3917	16.4294	19.2016	22.3715	25.6929	30.005	34.9765	41.2455	51.165	60.7149	75.8009	100.499
0.696058	1.43496	2.20848	3.04401	3.99343	5.00764	6.06317	7.55687	8.91729	10.557	12.5135	14.429	16.5017	19.2106	22.3948	25.6941	30.0688	35.0646	41.4878	51.316	61.0238	75.8065	100.677
0.697044	1.43496	2.21029	3.05213	3.99517	5.01335	6.08802	7.57529	8.94346	10.6132	12.5866	14.4397	16.5048	19.2111	22.3998	25.7012	30.1565	35.0663	41.4958	51.3487	61.1839	75.9541	101.186
0.69736	1.43496	2.21247	3.06976	4.0047	5.0242	6.11967	7.58113	8.9654	10.6273	12.5893	14.4402	16.5085	19.2391	22.4238	25.7477	30.2495	35.0975	41.511	51.4565	61.1923	76.1798	101.408
0.700194	1.43617	2.21272	3.07202	4.00612	5.0307	6.13748	7.58378	9.02412	10.63	12.6017	14.4638	16.5281	19.2676	22.4743	25.8093	30.3145	35.1147	41.5214	51.5012	61.2635	76.3287	101.429
0.701583	1.43655	2.21484	3.08355	4.00612	5.03217	6.16354	7.58408	9.02866	10.655	12.6034	14.4662	16.5301	19.2857	22.5261	25.8124	30.3162	35.131	41.5765	51.5106	61.2635	76.6079	102.336
0.701583	1.44093	2.21484	3.08708	4.00612	5.05512	6.20117	7.60107	9.04876	10.676	12.611	14.4911	16.5821	19.3031	22.5265	25.8355	30.3739	35.2095	41.6329	51.6422	61.2832	76.7656	102.364
0.701583	1.44154	2.2186	3.10802	4.00732	5.06754	6.21304	7.62003	9.05545	10.6846	12.6161	14.4977	16.593	19.3261	22.5444	25.8469	30.4007	35.2445	41.7184	51.6665	61.3037	76.782	102.409
0.701583	1.44495	2.2186	3.11287	4.01917	5.07335	6.22573	7.66036	9.06518	10.753	12.6186	14.5017	16.6546	19.3376	22.6217	25.8792	30.5551	35.2544	41.7851	51.816	61.3258	76.9144	103.149
0.702404	1.44635	2.22186	3.11287	4.03039	5.07335	6.2272	7.69919	9.07328	10.7563	12.6267	14.5017	16.6709	19.3612	22.7611	25.9491	30.5877	35.3024	41.8945	51.8376	61.3519	76.9705	103.385
0.70249	1.4483	2.22833	3.11514	4.05174	5.07335	6.24566	7.72567	9.07549	10.7945	12.7238	14.5216	16.709	19.4763	22.7779	26.0732	30.6117	35.3254	42.0063	51.9011	61.4016	77.1609	104.089
0.706049	1.45578	2.23443	3.11582	4.05813	5.08053	6.24994	7.73782	9.09682	10.8113	12.7301	14.5588	16.7244	19.5021	22.7805	26.0826	30.643	35.3673	42.4653	51.9474	61.484	77.7905	104.354
0.706596	1.46096	2.25086	3.1204	4.06349	5.09008	6.28759	7.75956	9.10547	10.8533	12.7402	14.5851	16.7701	19.5314	22.8424	26.0834	30.6788	35.3952	42.4749	51.9478	61.5062	77.9865	104.386
0.707369	1.4652	2.25406	3.13433	4.06934	5.12088	6.30412	7.7651	9.18823	10.8694	12.7527	14.599	16.7851	19.5363	22.854	26.1628	30.7706	35.4641	42.5593	52.0745	61.6794	78.0691	104.549
0.707477	1.46562	2.26526	3.13641	4.07358	5.18896	6.31307	7.78217	9.23606	10.8747	12.7549	14.6184	16.7929	19.5391	22.9633	26.1816	30.7971	35.4931	42.6756	52.0796	61.7271	78.111	104.998
0.710327	1.46757	2.26602	3.13852	4.08508	5.19338	6.33349	7.78488	9.26469	10.9056	12.7963	14.7182	16.8113	19.5471	22.9712	26.1937	30.8991	35.5263	42.7306	52.119	61.7318	78.2662	105.163
0.712634	1.46958	2.26887	3.14395	4.09435	5.21252	6.34871	7.81612	9.30854	10.9225	12.818	14.7326	16.8374	19.595	23.0765	26.2039	30.9002	35.5354	42.7729	52.2258	61.77	78.4045	105.716
0.714642	1.4704	2.27029	3.15573	4.09985	5.21489	6.41734	7.82098	9.30888	10.9228	12.8646	14.7492	16.9456	19.6019	23.1436	26.2122	30.9387	35.5407	42.7757	52.3255	61.846	78.5725	106.184
0.715388	1.47604	2.27671	3.15672	4.10349	5.21604	6.41734	7.83542	9.31215	10.9248	12.8974	14.7604	16.9582	19.6706	23.1441	26.2854	30.9653	35.6478	42.7786	52.3492	61.8518	78.6899	106.525
0.716059	1.47656	2.27713	3.15717	4.10738	5.23202	6.43499	7.84804	9.31588	10.9792	12.9123	14.7611	16.9853	19.7443	23.1553	26.2952	31.0166	35.6705	42.7941	52.4744	61.975	79.5595	106.58
0.721252	1.48278	2.28152	3.16579	4.12386	5.26722	6.44753	7.85858	9.31979	11.0095	12.9158	14.7696	16.9914	19.7708	23.1969	26.3153	31.0301	35.7168	42.8729	52.5247	62.0234	79.6365	106.909
0.722041	1.48654	2.28891	3.16869	4.12687	5.2724	6.44922	7.86066	9.3386	11.0172	12.9321	14.7697	17.0847	19.7845	23.2386	26.3504	31.0308	35.7248	42.9107	52.7399	62.0254	80.0452	107.184
0.727594	1.48696	2.29067	3.16942	4.13609	5.30102	6.45143	7.86187	9.36728	11.0551	13.0496	14.7892	17.1184	19.8153	23.3115	26.445	31.0322	35.8007	42.9601	52.8781	62.0747	80.0727	107.519
0.727806	1.49393	2.29376	3.16997	4.14549	5.30107	6.45301	7.87884	9.37097	11.0572	13.0615	14.8024	17.1426	19.8272	23.3465	26.4651	31.0543	35.8013	43.204	52.9056	62.2242	80.5903	107.982
0.728035	1.4968	2.31086	3.17386	4.14675	5.30889	6.45967	7.87884	9.40082	11.0587	13.0745	14.8352	17.1767	19.8749	23.3754	26.4696	31.0589	35.8489	43.218	52.9675	62.3006	80.6205	108.146
0.729139	1.49693	2.31174	3.1813	4.15293	5.31281	6.45967	7.87884	9.40323	11.0742	13.0828	14.8373	17.1888	19.9982	23.377	26.5473	31.0655	35.8841	43.2402	53.0787	62.3011	80.9571	108.188
0.729428	1.49693	2.3123	3.18564	4.1605	5.31316	6.49706	7.88305	9.40876	11.1424	13.1099	14.879	17.1949	20.0197	23.4073	26.6463	31.0705	35.948	43.2791	53.0832	62.4021	80.9652	108.47
0.730053	1.49784	2.31393	3.18818	4.16896	5.32382	6.49706	7.8852	9.41196	11.2278	13.1194	14.9308	17.1949	20.0239	23.4083	26.6463	31.0792	36.0282	43.3167	53.2338	62.4659	81.0631	108.497
0.730089	1.50802	2.3142	3.19424	4.1736	5.32435	6.50605	7.89037	9.4359	11.2344	13.1963	14.9449	17.2344	20.1087	23.4255	26.668	31.0863	36.0803	43.3364	53.2843	62.4736	81.3599	108.764
0.73049	1.51707	2.31652	3.20581	4.17635	5.32678	6.50707	7.90112	9.44169	11.2392	13.2025	14.9898	17.2353	20.1169	23.441	26.7071	31.1384	36.102	43.3449	53.3002	62.5163	81.5827	109.176
0.731055	1.51856	2.32483	3.209	4.19083	5.32844	6.5209	7.90602	9.46203	11.2536	13.2025	14.993	17.2688	20.1647	23.4413	26.77	31.1715	36.1736	43.3847	53.4615	62.6167	81.6623	109.228
0.733956	1.52124	2.33175	3.2127	4.19414	5.33345	6.60108	7.95153	9.47786	11.2685	13.2036	14.9985	17.2745	20.1893	23.4475	26.8579	31.1996	36.2278	43.3921	53.4965	62.6182	81.6794	109.35
0.734578	1.52642	2.3319	3.21495	4.20302	5.34622	6.60339	7.96821	9.49223	11.2714	13.2237	15.0038	17.2792	20.2516	23.4598	26.9237	31.2268	36.2603	43.4782	53.6106	62.7983	81.7468	109.421
0.735938	1.53084	2.33465	3.23544	4.20525	5.37477	6.61744	7.96878	9.51923	11.2908	13.2291	15.0191	17.3241	20.2934	23.4792	26.9642	31.2345	36.2622	43.4862	53.736	62.8402	81.8531	109.589
0.737562	1.53848	2.33465	3.23686	4.21245	5.37477	6.61754	7.98573	9.57296	11.3006	13.2296	15.0345	17.3732	20.3102	23.4866	27.0759	31.3137	36.2961	43.5207	53.8164	62.9902	82.1102	109.674
0.73796	1.5401	2.33741	3.23686	4.21796	5.40445	6.61859	7.99574	9.57759	11.3027	13.2305	15.0757	17.3759	20.3194	23.5065	27.0882	31.3246	36.3194	43.5508	53.8627	63.1079	82.6714	109.674
0.738059	1.54327	2.34007	3.23686	4.26326	5.41339	6.61993	8.00006	9.57776	11.3118	13.2326	15.1064	17.3908	20.3471	23.5259	27.1418	31.3321	36.3819	43.5537	53.8945	63.1733	82.7936	109.838
0.738082	1.54622	2.34905	3.24053	4.27187	5.41743	6.62628	8.00467	9.59841	11.3203	13.2407	15.1351	17.4015	20.3489	23.5781	27.2309	31.3953	36.4115	43.8849	53.9763	63.7388	82.8457	109.89
0.738281	1.5513	2.35004	3.24827	4.27506	5.41965	6.63188	8.00645	9.59848	11.3421	13.2552	15.1623	17.4049	20.3679	23.666	27.3507	31.397	36.4823	44.3122	53.9933	63.92	82.9427	110.043
0.738281	1.55238	2.35115	3.25921	4.28195	5.43639	6.63591	8.03488	9.61006	11.457	13.2679	15.1816	17.4124	20.3955	23.7549	27.3707	31.4201	36.5124	44.5865	53.9995	63.9605	82.9892	110.287
0.738281	1.55452	2.3519	3.26173	4.28573	5.43715	6.63656	8.04058	9.61027	11.4593	13.2682	15.1946	17.4383	20.4106	23.7932	27.3873	31.4538	36.6134	44.9228	54.3317	63.9891	83.3575	110.5
0.738281	1.55643	2.35199	3.26629	4.29452	5.43981	6.63787	8.04617	9.61027	11.4657	13.2721	15.1978	17.5142	20.4273	23.8074	27.4991	31.4649	36.6447	45.1309	54.3713	64.0723	83.7026	111.223
0.738281	1.55643	2.35318	3.27948	4.29784	5.44405	6.64453	8.05837	9.6123	11.4666	13.3096	15.2174	17.5695	20.4425	23.8186	27.5053	31.5059	36.6779	45.2341	54.4273	64.0771	83.8736	111.383
0.738281	1.55643	2.35318	3.29023	4.29784	5.44832	6.645	8.07582	9.61655	11.5053	13.3105	15.2257	17.5956	20.485	23.857	27.5141	31.5492	36.7195	45.3033	54.4891	64.1253	84.2	111.513
0.738281	1.55643	2.36778	3.30169	4.3108	5.47365	6.64909	8.11049	9.62181	11.5077	13.3116	15.2578	17.5956	20.5012	23.8654	27.5257	31.5626	36.7215	45.322	54.8115	64.8092	84.299	111.986
0.738281	1.55643	2.37488	3.30169	4.3175	5.50282	6.64909	8.11254	9.6242	11.5107	13.3317	15.2604	17.6077	20.549	23.8686	27.602	31.8918	36.761	45.3277	54.9316	64.8964	84.5019	112.237
0.738281	1.55643	2.37785	3.30478	4.33195	5.50282	6.6558	8.11289	9.62601	11.5415	13.3347	15.2824	17.6179	20.5829	23.877	27.6772	31.9325	36.7767	45.3541	54.9394	65.2162	84.6745	112.572
0.740693	1.55643	2.37882	3.30565	4.33576	5.51341	6.68017	8.12109	9.63892	11.5467	13.338	15.3007	17.6189	20.6868	23.9004	27.7115	31.9818	36.8911	45.4269	55.2243	65.2446	84.6791	112.961
0.741844	1.56189	2.39734	3.31028	4.3366	5.51572	6.69471	8.12116	9.71057	11.5548	13.3412	15.346	17.6213	20.6936	23.9443	27.7642	32.0073	36.9113	45.6011	55.3011	65.6605	84.9056	113.514
0.744141	1.5638	2.40853	3.31085	4.33809	5.51906	6.72156	8.12707	9.72277	11.5607	13.3577	15.3481	17.6343	20.6991	23.9632	27.7785	32.0867	36.9658	45.6363	55.3317	66.0948	85.0609	114.003
0.744141	1.56879	2.41014	3.33436	4.34299	5.54364	6.7575	8.13599	9.74482	11.5814	13.3638	15.3668	17.6631	20.7227	23.9926	27.7814	32.176	36.9673	45.6762	55.3465	66.1187	85.3871	114.571
0.744141	1.57227	2.41124	3.33964	4.34462	5.5474	6.82467	8.14556	9.75997	11.5896	13.3935	15.4288	17.6784	20.7402	24.0352	27.7857	32.1782	37.0165	45.8483	55.3541	66.2392	85.56	115.237
0.744171	1.57577	2.41138	3.34378	4.34517	5.5494	6.82558	8.16627	9.76702	11.5899	13.407	15.469	17.6785	20.7902	24.0682	27.8358	32.2612	37.0925	45.9093	55.4394	66.2598	85.5728	115.654
0.74429	1.57577	2.42007	3.34422	4.37003	5.56202	6.84427	8.17314	9.76758	11.5971	13.4083	15.4708	17.7013	20.8242	24.0925	27.8709	32.3328	37.1308	45.9741	55.494	66.5318	85.717	116.309
0.744623	1.57577	2.42094	3.34724	4.38157	5.56847	6.85389	8.19163	9.78652	11.608	13.4216	15.5149	17.7079	20.8859	24.1291	27.8759	32.3686	37.1781	46.2303	55.5698	66.5358	85.8035	117.077
0.744786	1.57577	2.42374	3.35177	4.38702	5.57416	6.86366	8.21028	9.7975	11.6173	13.4247	15.5242	17.8838	20.9541	24.2237	27.9889	32.3902	37.2448	46.3186	55.689	66.6946	85.8695	117.413
0.745058	1.57577	2.4269	3.35896	4.3954	5.57933	6.88209	8.21295	9.7975	11.6374	13.4266	15.5429	17.8971	20.9721	24.2349	28.0604	32.4853	37.2701	46.3378	55.7091	66.695	85.8924	118.1
0.745299	1.57973	2.4299	3.3738	4.39917	5.60785	6.88963	8.24622	9.8146	11.6725	13.4758	15.548	17.9632	20.9826	24.2349	28.0817	32.6188	37.4362	46.3727	55.8671	66.6969	85.9174	118.145
0.747984	1.58008	2.43299	3.37877	4.40226	5.60989	6.89149	8.25424	9.82842	11.6799	13.5339	15.548	17.971	20.9859	24.241	28.086	32.6517	37.4556	46.4614	55.9629	66.7295	85.943	119.801
0.751506	1.58489	2.4362	3.38137	4.43652	5.61227	6.89502	8.26367	9.82995	11.6936	13.553	15.5565	18.1073	20.9868	24.2424	28.1087	32.6946	37.4592	46.5199	56.1364	66.9661	85.9981	120.333
0.751546	1.58573	2.4362	3.39183	4.43652	5.6161	6.89642	8.27256	9.8417	11.7157	13.5612	15.5698	18.1109	20.9888	24.2832	28.1457	32.6986	37.6278	46.5534	56.284	67.1705	86.0009	120.727
0.753217	1.58827	2.4528	3.3942	4.43652	5.62378	6.89693	8.27452	9.88123	11.7328	13.591	15.5838	18.1251	21.0108	24.2838	28.1559	32.7026	37.6419	46.5701	56.4341	67.198	86.1455	121.102
0.753662	1.58827	2.45378	3.40175	4.43749	5.627	6.90815	8.27651	9.89174	11.7637	13.5982	15.5994	18.1839	21.084	24.291	28.1592	32.7684	37.7064	46.6729	56.5614	67.2138	86.3214	122.202
0.753953	1.58885	2.45517	3.40546	4.44597	5.62821	6.93128	8.29567	9.90033	11.764	13.6071	15.6051	18.3434	21.1029	24.2928	28.1721	32.8289	37.7936	46.9323	56.5828	67.4247	86.6687	122.674
0.755095	1.59157	2.46151	3.40721	4.45695	5.64058	6.94391	8.29752	9.90257	11.7904	13.6223	15.622	18.3744	21.1245	24.2959	28.2752	32.8334	37.9772	47.2731	56.8498	67.5055	86.7131	123.221
0.755308	1.59366	2.4658	3.40856	4.46597	5.6474	6.9522	8.30161	9.95567	11.792	13.6288	15.6345	18.4411	21.1412	24.3288	28.3019	32.8588	38.222	47.3758	56.8525	67.5732	87.7894	123.892
0.765226	1.59554	2.46656	3.41046	4.47173	5.65308	6.96058	8.33347	9.97153	11.7935	13.6352	15.6748	18.4558	21.1577	24.3419	28.383	32.8634	38.284	47.46	57.0254	67.5876	87.8702	124.13
0.768872	1.59585	2.46804	3.41288	4.47252	5.66016	6.96493	8.35995	9.97899	11.8259	13.6675	15.6768	18.457	21.1595	24.431	28.4289	32.8947	38.307	47.5737	57.3573	67.6597	88.0059	124.87
0.768945	1.60532	2.4718	3.41798	4.47585	5.67441	6.97321	8.37081	9.99909	11.8365	13.6809	15.7212	18.4587	21.1652	24.4328	28.481	32.9461	38.3088	47.6796	57.3573	67.8675	88.2871	124.988
0.770295	1.60556	2.47321	3.42195	4.49347	5.67763	6.99828	8.39202	10.0329	11.8381	13.6842	15.7474	18.4673	21.1745	24.4637	28.531	32.9688	38.3491	47.697	57.3699	67.8728	88.4354	125.061
0.771447	1.60666	2.48027	3.42253	4.50269	5.68562	7.063	8.4105	10.0383	11.8396	13.6883	15.7498	18.5029	21.2653	24.4668	28.607	33.0188	38.3895	47.7179	57.4093	67.9441	88.7429	125.526
0.773367	1.60744	2.48047	3.42419	4.52761	5.69566	7.0643	8.45229	10.0416	11.8686	13.7315	15.7524	18.5353	21.2967	24.4811	28.6401	33.0449	38.4029	47.9248	57.4538	67.9562	88.9441	126.552
0.773581	1.61938	2.48047	3.43271	4.55356	5.7081	7.06876	8.45815	10.0481	11.8764	13.7328	15.8754	18.5421	21.3778	24.5263	28.6579	33.1314	38.4182	47.9378	57.4923	68.0025	89.0363	127.135
0.776707	1.62477	2.48257	3.43273	4.55661	5.73685	7.09545	8.49095	10.0698	11.8866	13.7565	15.8794	18.561	21.3827	24.5761	28.6816	33.2092	38.5464	48.0608	57.5344	68.1054	89.1063	128.301
0.776839	1.6255	2.49267	3.43812	4.56103	5.76144	7.10269	8.55519	10.0751	11.9374	13.7576	15.9106	18.5903	21.4312	24.5954	28.7126	33.2392	38.5659	48.173	57.5502	68.1436	89.5229	128.528
0.777202	1.62653	2.4945	3.44531	4.56109	5.76616	7.11886	8.59569	10.0832	11.9564	13.7623	15.959	18.6056	21.4516	24.6777	28.7572	33.241	38.5785	48.4132	57.588	68.2815	89.67	129.323
0.778217	1.6305	2.49458	3.4491	4.57207	5.76961	7.12676	8.60976	10.1103	11.9568	13.7962	15.9638	18.6204	21.4576	24.6941	28.8258	33.242	38.79	48.5841	57.7903	68.5504	89.855	132.432
0.778217	1.63105	2.49679	3.45342	4.57559	5.77942	7.13094	8.62652	10.138	11.9586	13.801	15.9755	18.6725	21.4786	24.7856	28.9095	33.3261	39.0758	48.6118	57.8847	68.5631	90.1322	133.493
0.778217	1.63379	2.4997	3.45344	4.5766	5.79236	7.13821	8.62832	10.1467	11.9614	13.8661	15.9809	18.6791	21.4909	24.7869	28.9269	33.334	39.1343	48.7054	57.8856	68.5843	90.1446	134.975
0.778217	1.63726	2.5036	3.45489	4.59769	5.80802	7.13859	8.64136	10.2	11.9702	13.8662	16.032	18.6834	21.5269	24.805	28.9342	33.3354	39.1828	48.7194	57.9374	68.6994	90.2131	136.602
0.778217	1.63773	2.50967	3.47375	4.61159	5.80802	7.15367	8.65299	10.2772	11.9841	13.8773	16.062	18.6912	21.5449	24.833	28.9488	33.36	39.345	48.7464	57.9497	68.8811	90.2236	137.663
0.778217	1.64146	2.50967	3.4751	4.61695	5.81301	7.1541	8.6639	10.2928	11.9888	13.8832	16.0727	18.7015	21.5555	24.8914	28.9744	33.4164	39.4356	48.7598	57.9868	68.931	90.2392	137.709
0.778217	1.65009	2.50967	3.47538	4.61998	5.83166	7.15413	8.69546	10.3078	12.152	13.8981	16.1015	18.7153	21.5851	24.902	29.0177	33.4535	39.438	48.8711	57.9995	69.2206	90.492	138.037
0.778217	1.65065	2.50967	3.48029	4.62368	5.84969	7.17441	8.69597	10.3379	12.1771	13.9193	16.1054	18.7419	21.6367	24.9105	29.1454	33.5347	39.6293	48.9302	58.0411	69.7492	90.5428	138.453
0.778217	1.65085	2.50967	3.48441	4.65053	5.87783	7.1748	8.70769	10.3736	12.181	13.9232	16.1348	18.7738	21.6367	24.9592	29.1489	33.5916	39.67	49.107	58.1099	70.4899	90.9312	138.912
0.778217	1.65085	2.50967	3.49663	4.66038	5.89121	7.1748	8.72853	10.3934	12.1826	14.0021	16.2371	18.7823	21.6618	24.9661	29.2401	33.6837	39.7889	49.1118	58.1168	70.5534	91.0243	140.18
0.778217	1.65085	2.53341	3.49765	4.66038	5.90183	7.18095	8.72853	10.4089	12.2023	14.006	16.3129	18.7839	21.6632	25.0736	29.2488	33.7344	39.8612	49.1726	58.3005	70.661	91.2169	141.887
0.778217	1.65085	2.53369	3.50791	4.67801	5.90946	7.20429	8.72876	10.4221	12.2038	14.0272	16.3542	18.7878	21.6786	25.1055	29.2893	33.8239	39.9324	49.2415	58.3014	70.6863	91.2375	142.129
0.778217	1.65085	2.53369	3.52893	4.67985	5.92377	7.22295	8.7335	10.4257	12.2061	14.036	16.3657	18.8812	21.6918	25.2072	29.376	33.8676	39.956	49.3478	58.3036	70.694	91.257	143.293
0.778217	1.65154	2.53369	3.53036	4.68015	5.92966	7.23175	8.73761	10.4276	12.2138	14.0755	16.368	18.9028	21.7525	25.2375	29.3999	33.9228	40.1563	49.4057	58.3388	70.7048	91.3127	144.443
0.778217	1.65196	2.53738	3.54419	4.69073	5.95367	7.23176	8.73893	10.4293	12.2138	14.122	16.388	18.9703	21.756	25.2863	29.4532	33.9673	40.175	49.433	58.359	70.7116	91.6001	144.467
0.780201	1.66395	2.53752	3.55149	4.69439	5.99647	7.24956	8.74539	10.4327	12.2183	14.1995	16.4124	19.0753	21.8422	25.2959	29.4802	33.9872	40.2113	49.4928	58.3926	70.8464	91.6959	145.695
0.780354	1.66395	2.53789	3.5547	4.69806	6.07776	7.28837	8.76627	10.4409	12.2453	14.2011	16.418	19.0851	21.8456	25.3046	29.5197	34.0787	40.2561	49.5529	58.4958	71.4638	92.2114	145.832
0.784393	1.66395	2.53968	3.57417	4.70083	6.07807	7.29337	8.77223	10.4467	12.2639	14.2011	16.4204	19.1006	21.8858	25.3107	29.5472	34.0838	40.3413	49.6189	58.5103	71.5033	92.6951	146.043
0.784393	1.66395	2.54058	3.58318	4.70161	6.07868	7.30884	8.7759	10.4554	12.298	14.2416	16.4475	19.1077	21.9051	25.3445	29.63	34.1036	40.3933	49.6695	58.5191	71.6319	92.7096	146.665
0.784393	1.66491	2.54154	3.58338	4.70942	6.09193	7.32678	8.78488	10.4563	12.3152	14.2577	16.4662	19.1519	21.9512	25.3668	29.6319	34.1414	40.7432	49.7456	58.575	71.7214	92.7835	147.256
0.784393	1.66528	2.54531	3.59435	4.73371	6.09299	7.34168	8.80562	10.4659	12.3268	14.2885	16.4739	19.1826	21.9705	25.4015	29.6949	34.1442	40.8077	49.7667	58.6034	71.7354	92.8216	147.56
0.785659	1.66584	2.5538	3.59895	4.73371	6.11113	7.34168	8.81212	10.4698	12.3386	14.3707	16.4772	19.2673	21.9742	25.4677	29.7033	34.1455	40.9471	49.9788	58.6464	71.8139	93.008	147.905
0.789545	1.675	2.55689	3.60328	4.73893	6.11195	7.37496	8.82523	10.4744	12.3508	14.3717	16.543	19.3021	22.0427	25.6462	29.7451	34.1938	41.0602	50.0316	58.6638	72.4975	93.0514	148.933
0.789787	1.6802	2.5581	3.61374	4.7416	6.12317	7.39149	8.8327	10.5227	12.3601	14.3749	16.5451	19.3054	22.0705	25.6594	29.7478	34.2145	41.4276	50.0952	58.7298	72.5246	93.0927	149.552
0.7905	1.68029	2.56187	3.646	4.74419	6.13733	7.39889	8.83359	10.5499	12.3661	14.3889	16.6364	19.3748	22.0987	25.6614	29.7647	34.3235	41.4567	50.1262	58.7685	72.6845	93.3526	149.807
0.790696	1.68337	2.56307	3.65624	4.74842	6.15234	7.40441	8.8532	10.5663	12.3764	14.3952	16.6392	19.3853	22.1693	25.6678	29.779	34.3397	41.4789	50.2688	58.8308	72.9783	93.5965	150.325
0.79182	1.68438	2.56443	3.65687	4.75137	6.15234	7.44001	8.86399	10.6037	12.3794	14.3995	16.6564	19.3882	22.1826	25.6894	29.888	34.4211	41.5303	50.2847	59.0404	73.3694	93.6028	150.349
0.794649	1.69157	2.56929	3.65778	4.75154	6.15263	7.44001	8.89008	10.6078	12.3999	14.4331	16.6564	19.4148	22.2104	25.7555	29.9012	34.612	41.8799	50.3525	59.0481	73.409	93.666	151.131
0.79921	1.69621	2.56929	3.65845	4.75286	6.17004	7.45789	8.89596	10.6166	12.4169	14.4384	16.6638	19.4414	22.2398	25.7568	29.9032	34.6188	41.9731	50.3537	59.0965	73.5824	93.7493	151.739
0.801014	1.69955	2.5794	3.65845	4.76532	6.17702	7.46205	8.89973	10.6373	12.4426	14.4486	16.685	19.443	22.2535	25.8274	29.9097	34.6425	42.0208	50.478	59.1302	73.6877	94.788	151.859
0.80317	1.71341	2.58088	3.65845	4.76594	6.17797	7.46865	8.90513	10.6505	12.4568	14.4507	16.7082	19.4758	22.3594	25.8398	29.9316	34.6748	42.1008	50.5364	59.1634	73.8075	94.8113	152.175
0.803828	1.71488	2.58969	3.67467	4.79804	6.17853	7.46972	8.91174	10.6846	12.4571	14.4793	16.7137	19.4759	22.3657	25.8563	29.9708	34.7227	42.1657	50.5553	59.1905	73.8585	94.9963	152.302
0.805679	1.71562	2.59315	3.67873	4.82426	6.186	7.48465	8.91693	10.6846	12.4637	14.484	16.7303	19.4772	22.4533	25.9049	30.0751	34.742	42.2035	50.6385	59.306	74.2215	95.7555	152.858
0.806024	1.72062	2.59663	3.68716	4.8254	6.20117	7.48851	8.92236	10.6987	12.464	14.5049	16.7391	19.485	22.4809	25.9754	30.0806	34.7558	42.2207	50.6533	59.4004	74.2956	96.2658	153.442
0.807804	1.7217	2.59714	3.68831	4.82572	6.20117	7.49678	8.93128	10.7608	12.5024	14.5052	16.7416	19.5119	22.4835	25.9882	30.1177	34.766	42.3081	50.8134	59.4305	74.3045	96.289	153.496
0.807901	1.72219	2.59802	3.69141	4.83576	6.2155	7.51292	8.96064	10.7859	12.5097	14.5126	16.7469	19.5391	22.5518	26.0538	30.1292	34.8003	42.3238	50.8244	59.4315	74.4244	96.3472	153.911
0.808259	1.7224	2.60737	3.69141	4.84152	6.22098	7.5207	8.98857	10.8236	12.5135	14.5279	16.7796	19.5551	22.5567	26.0744	30.1799	34.9664	42.3453	50.8251	59.5002	74.4526	96.3595	153.93
0.809761	1.72266	2.60843	3.69141	4.88482	6.223	7.54854	9.00264	10.8267	12.5209	14.567	16.8355	19.5748	22.6034	26.1816	30.2527	35.0071	42.3926	50.8531	59.6055	74.4789	96.5854	154.035
0.811684	1.73633	2.61601	3.69949	4.88482	6.22573	7.5595	9.00693	10.8276	12.5434	14.6066	16.8444	19.5821	22.6116	26.1941	30.2749	35.0117	42.554	50.9856	59.6583	74.9455	96.7202	154.872
0.815938	1.73633	2.61917	3.6996	4.8857	6.22573	7.58986	9.0253	10.8349	12.5527	14.628	16.9132	19.5904	22.6274	26.2424	30.2805	35.0344	42.592	51.0317	59.738	75.0118	96.7762	155.035
0.816498	1.74015	2.63544	3.72407	4.90388	6.2306	7.59881	9.0253	10.8689	12.5604	14.6369	16.9187	19.5972	22.663	26.2676	30.3083	35.0369	42.7325	51.3246	59.8019	75.1944	96.81	155.888
0.82095	1.74015	2.64178	3.74187	4.90431	6.23211	7.60623	9.03444	10.8696	12.5787	14.6441	16.9259	19.6135	22.6715	26.2768	30.3105	35.0528	42.7459	51.3889	59.8418	75.3326	96.8888	168.656
0.824972	1.74499	2.64326	3.74839	4.92074	6.23636	7.63527	9.05224	10.8998	12.6017	14.6772	16.9402	19.6459	22.7167	26.3547	30.3404	35.087	42.8549	51.4142	60.0509	75.3887	97.0474	172.121
0.82831	1.7463	2.64669	3.74839	4.92802	6.23787	7.6408	9.05545	10.9006	12.6118	14.6885	16.9585	19.6644	22.7433	26.3734	30.5012	35.1054	42.9988	51.4501	60.2228	75.4507	97.0532	172.528
0.828635	1.74746	2.65051	3.75363	4.93788	6.24045	7.65664	9.05545	10.9253	12.6228	14.7536	16.9846	19.6998	22.7435	26.4509	30.542	35.1432	43.0012	51.4721	60.3306	75.4507	97.1619	175.407
0.829902	1.74786	2.65051	3.75363	4.93908	6.24118	7.66623	9.05545	10.9571	12.6502	14.7656	17.0242	19.7386	22.8605	26.5102	30.6217	35.1665	43.0186	51.5471	60.3793	75.7973	97.3014	175.793
0.829908	1.74817	2.65162	3.75513	4.93989	6.24677	7.70203	9.06768	10.9595	12.6557	14.7734	17.032	19.7671	22.9134	26.5255	30.6506	35.2277	43.0673	51.6193	60.4735	75.9138	97.3443	176.819
0.830675	1.74853	2.66191	3.75684	4.94352	6.26042	7.7275	9.07549	10.9815	12.6678	14.7893	17.0401	19.7724	22.9692	26.5257	30.6671	35.3183	43.2243	51.6497	60.5536	75.9439	97.3639	177.513
0.833256	1.74883	2.66787	3.76119	4.94642	6.26452	7.7275	9.09271	10.991	12.6852	14.8529	17.0841	19.7819	22.9712	26.6143	30.7009	35.3289	43.3787	51.6655	60.8125	76.2372	97.8516	177.532
0.834714	1.75322	2.66974	3.76864	4.96342	6.26922	7.7351	9.10547	11.0269	12.7043	14.861	17.0854	19.784	22.9874	26.6156	30.7144	35.3587	43.5038	51.6695	60.8648	76.4724	98.2198
0.835048	1.75396	2.68178	3.76942	4.96546	6.27418	7.73545	9.10879	11.0282	12.7138	14.9097	17.1166	19.7974	23.0101	26.6202	30.7341	35.48	43.5857	51.6967	61.1472	76.679	98.4353
0.835473	1.75396	2.68179	3.77814	4.97694	6.27418	7.74081	9.11365	11.0523	12.7328	14.9241	17.1384	19.8242	23.0381	26.6567	30.7351	35.5135	43.5913	51.7482	61.4308	76.7379	98.9731
0.837746	1.75439	2.68304	3.77946	4.97716	6.27418	7.75547	9.11876	11.0533	12.7362	14.9488	17.1384	19.8302	23.0723	26.6611	30.8092	35.5613	43.8385	51.9264	61.4371	76.9802	99.1437
0.838814	1.75452	2.68355	3.78817	4.97817	6.27559	7.7651	9.14378	11.0877	12.7424	14.9636	17.1655	19.8501	23.083	26.6918	30.8158	35.5871	43.9909	52.013	61.5239	77.0212	100.037
0.84193	1.75576	2.68437	3.7978	5.00083	6.28495	7.77049	9.15317	11.109	12.758	14.9825	17.172	19.9548	23.0912	26.7517	30.8427	35.6409	44.0691	52.1637	61.5613	77.0466	100.634
0.842383	1.77331	2.68529	3.81411	5.00406	6.29186	7.78217	9.19482	11.1424	12.7641	15.0072	17.185	19.9566	23.1108	26.8123	30.8491	35.6912	44.103	52.2258	61.6655	77.1232	100.731
0.847875	1.77461	2.69353	3.81862	5.01108	6.29225	7.79007	9.20402	11.1428	12.7675	15.0249	17.1914	19.9733	23.1191	26.8194	30.8605	35.7196	44.1171	52.3202	61.6709	77.175	100.824
0.850302	1.77461	2.6986	3.81891	5.01644	6.30788	7.80256	9.21314	11.1948	12.7969	15.0493	17.1914	19.9849	23.1289	26.8495	30.8763	35.774	44.2568	52.3975	61.7386	77.3291	101.315
0.854533	1.77461	2.71819	3.82832	5.01907	6.32398	7.8226	9.23659	11.2061	12.8293	15.058	17.1949	19.9882	23.1353	26.8513	30.8814	35.8066	44.475	52.4272	61.7813	77.8672	101.316
0.85636	1.77852	2.72055	3.83379	5.02956	6.3252	7.82393	9.25416	11.2171	12.8679	15.0636	17.1949	20.008	23.1385	26.8682	30.9261	35.9633	44.5186	52.4764	61.8768	77.8939	101.367
0.857834	1.78557	2.72607	3.8338	5.03207	6.33437	7.84804	9.26046	11.2171	12.8727	15.0691	17.2002	20.0364	23.1694	26.9863	30.9384	35.9898	44.6124	52.7162	61.8768	78.061	101.381
0.858652	1.786	2.72664	3.83468	5.04458	6.35697	7.84804	9.26219	11.2236	12.8841	15.0986	17.212	20.0397	23.271	27.003	30.9501	36.0416	44.6448	52.8271	62.0439	78.1096	101.89
0.861565	1.78869	2.73977	3.84395	5.05708	6.35794	7.87293	9.2678	11.2247	12.8952	15.1101	17.2122	20.0409	23.2751	27.0143	30.9501	36.0688	44.657	52.8346	62.0587	78.3014	102.132
0.867716	1.79132	2.74314	3.84519	5.05918	6.36295	7.87884	9.28189	11.2263	12.9008	15.2121	17.234	20.0926	23.2821	27.1796	31.0361	36.2802	44.6956	53.2475	62.1804	78.3108	102.182
0.868408	1.79159	2.74918	3.84527	5.06662	6.36515	7.87896	9.30336	11.239	12.9079	15.2227	17.2894	20.1119	23.294	27.1972	31.1372	36.2919	44.8661	53.253	62.1819	78.6935	102.662
0.868665	1.79159	2.75193	3.86467	5.06738	6.36596	7.87915	9.35156	11.2489	12.9155	15.2557	17.3072	20.1363	23.3017	27.2187	31.1839	36.3218	44.9053	53.4023	62.3084	78.7527	102.687
0.871489	1.79159	2.75277	3.87094	5.07275	6.37989	7.89037	9.35279	11.3154	12.9941	15.2565	17.3616	20.1992	23.347	27.2437	31.3691	36.3302	44.9704	53.4027	62.3711	78.9301	102.867
0.873349	1.79159	2.76479	3.87616	5.07335	6.38422	7.89364	9.35429	11.3169	12.9959	15.2615	17.5361	20.2197	23.4146	27.2551	31.3943	36.3443	44.984	53.4879	62.623	79.6922	102.984
0.874076	1.79159	2.76522	3.88255	5.09529	6.38766	7.89407	9.3548	11.3216	12.9982	15.2967	17.5401	20.2925	23.4225	27.2864	31.4401	36.3894	45.093	53.5149	62.6501	79.877	103.222
0.878447	1.79359	2.76967	3.88628	5.1035	6.42142	7.9151	9.3548	11.323	13.0151	15.3149	17.5677	20.3215	23.4287	27.3095	31.5049	36.4089	45.1507	53.5422	62.6582	79.9421	103.596
0.881475	1.794	2.77259	3.89108	5.10608	6.46827	7.92339	9.36028	11.3364	13.0204	15.3233	17.5916	20.3292	23.4752	27.3264	31.6726	36.5544	45.2017	53.6067	62.6648	80.1707	103.7
0.882474	1.7948	2.77325	3.89108	5.13859	6.47372	7.92961	9.36451	11.3403	13.0219	15.358	17.6145	20.3545	23.4754	27.3341	31.6928	36.6828	45.264	53.7218	62.7056	80.2375	103.712
0.884161	1.79493	2.77627	3.90437	5.16152	6.49956	7.9398	9.37247	11.3428	13.104	15.3952	17.6859	20.3616	23.5698	27.4303	31.7253	36.7175	45.3033	53.813	62.7621	80.4218	104.6
0.885547	1.80135	2.78423	3.92172	5.16328	6.50278	7.95153	9.39152	11.3444	13.1116	15.4168	17.7495	20.4281	23.6711	27.4706	31.7284	36.7441	45.3627	53.8788	62.8033	80.5373	104.604
0.887304	1.80158	2.78609	3.92197	5.17644	6.50377	7.9564	9.41791	11.3697	13.1608	15.4177	17.7547	20.528	23.6948	27.5387	31.8052	36.79	45.4355	53.9192	62.9659	80.9663	104.796
0.887304	1.80373	2.79615	3.92244	5.17937	6.50763	7.96483	9.42677	11.4371	13.1862	15.4229	17.7632	20.554	23.7037	27.5768	31.8071	36.8069	45.4363	53.926	63.0005	81.2307	104.826
0.887304	1.80577	2.8059	3.9229	5.18437	6.51094	7.96997	9.43643	11.4441	13.2066	15.4272	17.7852	20.5894	23.7569	27.6064	31.9288	37.2369	45.4579	53.9372	63.3499	81.2348	105.065
0.887304	1.80581	2.8059	3.94336	5.20159	6.51275	8.00638	9.44534	11.4506	13.3301	15.4272	17.8173	20.6038	23.7628	27.6329	31.936	37.2612	45.548	54.0725	63.5094	81.3606	105.085
0.887304	1.80581	2.81846	3.95478	5.21463	6.51568	8.01474	9.5316	11.4626	13.3685	15.4322	17.8376	20.6071	23.849	27.6625	31.9443	37.2832	45.5984	54.1418	63.5213	81.4693	105.333
0.887304	1.8112	2.82817	3.95882	5.21463	6.54863	8.01601	9.53306	11.4643	13.3784	15.4749	17.8711	20.6558	23.9799	27.7139	31.9702	37.3729	45.6204	54.1546	63.5407	81.5299	105.849
0.887304	1.81188	2.83997	3.95962	5.21743	6.54981	8.01601	9.57238	11.5004	13.3994	15.5105	17.9091	20.6786	24.0098	27.7619	31.9817	37.4108	45.6366	54.2175	63.6013	81.7031	106.163
0.887304	1.81836	2.84936	3.96777	5.22044	6.56261	8.03283	9.5752	11.5163	13.4003	15.5145	17.9514	20.6953	24.0198	27.773	31.985	37.4847	45.676	54.302	63.9167	81.7165	106.199
0.887304	1.82419	2.86119	3.96814	5.23013	6.5666	8.03488	9.58503	11.5169	13.4003	15.5461	17.9608	20.7005	24.0452	27.7901	32.0577	37.7936	45.7017	54.3639	64.0411	81.7757	106.326
0.887304	1.82703	2.86727	3.97577	5.23259	6.5819	8.03488	9.60425	11.5691	13.4093	15.548	17.9918	20.7085	24.1046	27.8223	32.0592	37.8308	45.8806	54.4328	64.4117	82.0142	106.406
0.889678	1.83487	2.86963	3.97577	5.24705	6.58311	8.03488	9.61027	11.5706	13.4164	15.5643	18.0646	20.7316	24.1218	27.8469	32.1601	37.9406	45.9273	54.5174	64.4456	82.2315	106.568
0.890318	1.83883	2.86992	3.97634	5.25499	6.59094	8.0401	9.68345	11.5814	13.445	15.5663	18.082	20.83	24.1929	27.8503	32.2097	38.0033	45.9301	54.5767	64.4672	82.3061	106.909
0.892604	1.83989	2.86992	3.98097	5.25788	6.61255	8.05286	9.69979	11.5832	13.445	15.6289	18.117	20.9397	24.2122	27.852	32.2432	38.0168	46.0925	54.7087	64.7072	82.3311	107.525
0.892783	1.84407	2.86992	3.98306	5.26333	6.62628	8.07582	9.70226	11.5871	13.4486	15.6516	18.1232	20.9397	24.2374	27.8618	32.2877	38.0529	46.2334	54.7202	64.7153	82.3519	107.754
0.893041	1.84781	2.86992	3.98501	5.27829	6.62628	8.07963	9.7055	11.5992	13.4499	15.6795	18.1248	20.9554	24.2681	27.9089	32.3069	38.1024	46.3039	54.8591	64.7977	82.3965	107.803
0.894346	1.85325	2.87329	3.98614	5.30195	6.62628	8.08643	9.73066	11.6082	13.515	15.698	18.1839	20.9887	24.2681	27.9521	32.3356	38.1831	46.4329	55.0156	65.1009	82.5526	107.83
0.894346	1.85646	2.87444	3.99607	5.30326	6.64909	8.11848	9.7469	11.6142	13.6058	15.7237	18.2059	21.0479	24.3235	27.9559	32.3583	38.2054	46.438	55.053	65.3415	82.7318	107.979
0.894346	1.86168	2.88045	4.00488	5.30561	6.64909	8.1216	9.76667	11.616	13.6111	15.7585	18.2257	21.0499	24.3958	27.9573	32.4471	38.2832	46.47	55.3122	65.5678	82.7827	108.306
0.894346	1.86276	2.89031	4.01799	5.30769	6.64909	8.12519	9.76771	11.6366	13.6276	15.7846	18.317	21.081	24.4325	27.9632	32.5019	38.3708	46.6025	55.3361	65.7708	82.8196	108.667
0.894346	1.86635	2.90405	4.02551	5.30843	6.65484	8.15337	9.79431	11.6486	13.6516	15.8119	18.3711	21.0967	24.4744	28.0406	32.5212	38.5645	46.6216	55.441	65.8171	83.0468	109.113
0.894346	1.86728	2.91418	4.03791	5.31232	6.65951	8.16799	9.79624	11.6587	13.6714	15.8941	18.411	21.1354	24.5551	28.0519	32.5419	38.7238	46.6262	55.5785	65.8759	83.0518	109.441
0.894346	1.86883	2.91632	4.03791	5.31243	6.6596	8.17098	9.82528	11.6991	13.6776	15.9117	18.4132	21.2229	24.5674	28.0525	32.5887	38.7647	46.6781	55.5894	65.904	83.1899	110.518
0.894346	1.87317	2.92444	4.04069	5.31714	6.67564	8.21378	9.8378	11.7081	13.6789	15.9316	18.4374	21.3139	24.6154	28.1012	32.6255	38.8898	46.6826	55.7238	66.0552	83.2092	110.629
0.898338	1.87419	2.92794	4.06974	5.32984	6.67801	8.26477	9.84238	11.7129	13.6809	15.9425	18.474	21.314	24.6401	28.1129	32.6451	39.0693	46.7006	55.8438	66.5004	83.2732	110.648
0.898503	1.87419	2.92943	4.07219	5.34169	6.67887	8.27031	9.84718	11.7496	13.685	15.9656	18.5522	21.3145	24.6696	28.1725	32.6611	39.2618	46.7656	55.8893	66.558	83.4563	110.995
0.900682	1.87419	2.93934	4.0725	5.34309	6.67887	8.29215	9.86537	11.7585	13.6977	15.9706	18.5654	21.3847	24.7675	28.2325	32.6987	39.3286	47.2506	55.9543	66.7762	83.7565	111.301
0.9013	1.87489	2.93999	4.07358	5.37633	6.68908	8.29886	9.86716	11.8237	13.7209	15.9994	18.5699	21.3914	24.8357	28.2379	32.8862	39.3942	47.3019	56.1384	66.7899	83.7752	111.856
0.902324	1.87608	2.94515	4.07415	5.38195	6.6919	8.30179	9.87216	11.8571	13.7397	16.0131	18.5861	21.4013	24.8364	28.2981	32.9549	39.5201	47.3139	56.2091	66.8027	84.1095	111.909
0.907812	1.87807	2.94676	4.07818	5.41355	6.71705	8.32728	9.88644	11.8701	13.762	16.0482	18.5888	21.4183	24.8878	28.3082	32.9591	39.6311	47.3531	56.349	66.8368	84.1936	112.756
0.907841	1.8797	2.95827	4.08219	5.42379	6.7575	8.35632	9.89884	11.8949	13.7659	16.0675	18.6568	21.4725	24.9031	28.3469	33.139	39.6317	47.4042	56.3722	67.1167	84.199	112.942
0.90843	1.88042	2.95917	4.08765	5.43639	6.77036	8.36719	9.90814	11.8991	13.7861	16.0698	18.7164	21.4793	24.9279	28.3884	33.251	39.6753	47.5226	56.4092	67.2755	84.9618	114.485
0.909529	1.88217	2.95967	4.09582	5.43821	6.77436	8.36768	9.92036	11.9012	13.7914	16.0751	18.7176	21.5005	24.9379	28.3885	33.3176	39.7157	47.5649	56.5057	67.3938	85.1484	114.715
0.910186	1.88394	2.96336	4.10459	5.44142	6.78058	8.37538	9.94231	11.9169	13.8154	16.1243	18.7415	21.5581	24.9543	28.3996	33.3295	39.7671	47.5732	56.5566	67.4101	85.2636	114.983
0.910707	1.88804	2.97033	4.10591	5.44987	6.7838	8.38165	9.98678	11.9374	13.824	16.1337	18.7486	21.5624	24.9592	28.5493	33.3914	39.8618	47.6667	56.5759	67.4805	85.2948	115.042
0.911101	1.88907	2.97682	4.11219	5.4502	6.79179	8.38626	10.015	11.9476	13.8278	16.145	18.7579	21.5687	24.9654	28.6422	33.4513	39.9431	47.8429	56.5909	67.601	85.386	115.276
0.91318	1.88907	2.98	4.11559	5.46323	6.80895	8.39337	10.0329	11.9636	13.8749	16.1811	18.7995	21.6129	25.0158	28.674	33.4516	39.9521	47.8576	56.6037	67.6467	85.9746	115.406
0.91321	1.88907	2.98368	4.12528	5.4985	6.81113	8.39798	10.0615	11.9642	13.8783	16.1882	18.8039	21.6946	25.0356	28.7166	33.4816	40.0801	48.0898	56.6149	67.6668	86.0361	116.486
0.915822	1.88907	2.99159	4.14391	5.50282	6.82439	8.40826	10.113	11.9666	13.8964	16.2044	18.8242	21.6978	25.0371	28.8045	33.5194	40.1857	48.1386	56.6513	67.7728	86.0847	117.003
0.917512	1.88978	2.99207	4.15802	5.52816	6.84192	8.40894	10.124	11.9754	13.9017	16.2201	18.83	21.7282	25.0701	28.8177	33.659	40.3425	48.162	56.6679	68.0323	86.2888	117.056
0.919911	1.89048	2.99716	4.17188	5.54846	6.84211	8.4105	10.1364	12.0082	13.9212	16.307	18.8514	21.752	25.0895	28.9021	33.6976	40.4192	48.1992	56.7175	68.1044	86.6743	118.116
0.920942	1.89329	2.99716	4.17347	5.54974	6.84853	8.4263	10.1467	12.0289	13.9701	16.3127	18.8643	21.778	25.1221	28.9135	33.7231	40.4272	48.3103	56.7393	68.1871	86.7673	118.45
0.922402	1.89541	2.99982	4.17649	5.57364	6.85546	8.44817	10.2062	12.0308	13.9855	16.3219	18.8944	21.7787	25.1308	28.9199	33.7586	40.4798	48.3374	56.7746	68.54	86.8068	118.543
0.922471	1.89617	3.01074	4.19083	5.57416	6.86144	8.46069	10.2092	12.0337	14.0489	16.3333	18.9002	21.7797	25.1312	28.9515	33.7597	40.4856	48.3378	56.8434	68.6959	87.1125	118.584
0.922793	1.89777	3.01357	4.21245	5.57416	6.86315	8.48147	10.2157	12.0387	14.0582	16.3352	18.901	21.8002	25.1401	29.0215	33.783	40.5843	48.3828	56.8823	69.1751	87.2132	119.049
0.926987	1.90177	3.01643	4.21683	5.57416	6.88507	8.49313	10.2413	12.0424	14.0768	16.3875	18.9242	21.8127	25.1557	29.1151	33.9038	40.6241	48.3934	56.895	69.3312	87.2234	119.496
0.927438	1.90222	3.01762	4.22409	5.57933	6.89502	8.51338	10.2479	12.0656	14.0789	16.3919	18.9274	21.8197	25.231	29.1224	33.9616	40.6323	48.4248	56.9207	69.3703	87.2402	119.786
0.929914	1.90902	3.02524	4.23863	5.57957	6.89931	8.5147	10.2661	12.0817	14.1038	16.4044	18.9492	21.8807	25.2348	29.1737	33.9909	40.7552	48.4374	56.9282	69.4198	87.3827	121.044
0.932222	1.91476	3.0291	4.24824	5.58779	6.90608	8.53338	10.2693	12.0947	14.1201	16.4165	18.9941	21.8868	25.2914	29.1917	34.0041	40.7609	48.6612	56.9376	69.4338	87.4586	121.242
0.933133	1.92205	3.03343	4.25837	5.61725	6.90836	8.538	10.2726	12.1212	14.1464	16.4165	19.0156	21.9674	25.295	29.2207	34.0687	40.8068	48.7755	56.9405	69.9222	87.5796	121.726
0.934237	1.92383	3.0401	4.27534	5.62103	6.93006	8.55312	10.3036	12.1242	14.1557	16.4662	19.0916	21.9906	25.3389	29.2732	34.0976	41.0887	49.035	56.9502	69.9607	87.599	122.132
0.934322	1.9332	3.04203	4.29233	5.62258	6.93443	8.59576	10.3171	12.1644	14.1968	16.4935	19.0968	22.0113	25.3483	29.2947	34.1509	41.1343	49.0468	56.9961	69.9919	87.6062	122.657
0.937128	1.93748	3.04401	4.29701	5.62258	6.94382	8.62318	10.3359	12.1674	14.2756	16.5048	19.1158	22.0323	25.3703	29.3838	34.1611	41.3269	49.0468	57.0704	70.153	87.7304	122.729
0.940136	1.93984	3.05162	4.30488	5.62889	6.94974	8.62733	10.3376	12.2102	14.3198	16.5174	19.1556	22.0467	25.3734	29.4614	34.1878	41.3357	49.1018	57.1584	70.167	88.0325	123.727
0.941597	1.94652	3.08442	4.30488	5.65634	6.95233	8.62835	10.3854	12.2149	14.3219	16.5341	19.1605	22.0817	25.4112	29.5134	34.1936	41.403	49.1681	57.2294	70.1764	88.1302	123.976
0.942201	1.95109	3.08763	4.30488	5.66016	6.9583	8.64486	10.3869	12.2657	14.3546	16.578	19.1914	22.0841	25.4513	29.5306	34.3301	41.4222	49.2464	57.2431	70.2257	88.4418	126.035
0.942517	1.95527	3.08935	4.31006	5.6655	6.96323	8.66216	10.3992	12.2658	14.3559	16.5802	19.2723	22.148	25.6197	29.5569	34.337	41.429	49.2609	57.2532	70.4928	88.5787	126.087
0.942777	1.95868	3.09365	4.3103	5.6655	6.96928	8.6639	10.4006	12.2738	14.3824	16.6042	19.2787	22.1826	25.6233	29.5923	34.3695	41.4505	49.2686	57.2653	70.6731	88.8681	129.853
0.944186	1.9668	3.09428	4.31052	5.6655	6.96928	8.6781	10.4089	12.2912	14.3875	16.6054	19.3054	22.1826	25.6233	29.6157	34.4547	41.5502	49.3963	57.306	70.7248	89.2208	130.251
0.944291	1.96875	3.09462	4.32509	5.67673	6.97267	8.69656	10.4119	12.3052	14.3995	16.6116	19.3623	22.1875	25.6249	29.6444	34.4619	41.5567	49.3995	57.3661	71.2079	89.2832	130.422
0.948086	1.97415	3.1038	4.33195	5.68152	6.99946	8.70073	10.4214	12.3088	14.4	16.6505	19.3671	22.2298	25.6962	29.7208	34.5475	41.5794	49.455	57.3725	71.2201	89.3644	131.4
0.955189	1.97559	3.10802	4.3341	5.68152	6.99963	8.72406	10.4245	12.3152	14.4379	16.6751	19.3712	22.2592	25.755	29.7251	34.6125	41.7758	49.4623	57.6012	71.2312	89.6001	132.479
0.959876	1.97706	3.11006	4.33905	5.69183	7.00092	8.72832	10.4395	12.3319	14.4401	16.6928	19.3762	22.2609	25.7647	29.7356	34.6245	41.7867	49.4801	57.6825	71.3778	89.8647	132.61
0.962029	1.98407	3.11279	4.33905	5.69955	7.01339	8.73893	10.4416	12.3347	14.4659	16.7791	19.4074	22.3499	25.7752	29.7653	34.6419	41.8133	49.4988	57.9785	71.5304	89.9051	133.022
0.962852	1.98407	3.11871	4.34031	5.70643	7.01363	8.76315	10.4487	12.3563	14.469	16.8293	19.4207	22.3507	25.7788	29.7906	34.7383	41.9345	49.6018	58.0218	71.5371	90.0881	133.255
0.965857	1.98407	3.12838	4.35446	5.71591	7.02104	8.76484	10.4671	12.3576	14.4827	16.8387	19.4294	22.3595	25.8418	29.8023	34.8682	42.023	49.6572	58.0703	71.794	90.1467	133.601
0.968408	1.98407	3.13451	4.37023	5.72006	7.02459	8.77377	10.497	12.3661	14.5029	16.8417	19.447	22.3625	25.8731	29.8984	34.8698	42.0355	49.6756	58.1349	71.8477	90.2352	134.08
0.972296	1.98407	3.13757	4.38297	5.72496	7.03845	8.77679	10.507	12.3784	14.5279	16.8444	19.4574	22.3959	25.9264	30.1151	34.9153	42.2279	49.6856	58.1611	71.87	90.4474	134.432
0.974446	1.9915	3.1466	4.39018	5.72611	7.04705	8.78205	10.5296	12.3872	14.5335	16.8462	19.4711	22.4132	25.9443	30.3041	34.9164	42.2406	49.8027	58.1817	71.9352	90.5412	135.381
0.975979	1.99237	3.14932	4.3954	5.74259	7.05384	8.78942	10.5696	12.393	14.6273	16.8625	19.4768	22.4204	25.9568	30.3369	34.9616	42.3403	49.8641	58.1906	71.976	90.5545	135.414
0.977433	1.99982	3.15154	4.40634	5.74512	7.07634	8.79073	10.5706	12.4007	14.6274	16.8812	19.4927	22.4205	25.9754	30.3409	35.0385	42.3827	49.9525	58.2125	72.0702	90.5846	135.471
0.978006	2.00112	3.15577	4.43054	5.7534	7.08562	8.79159	10.5717	12.409	14.6276	16.912	19.547	22.4334	25.9941	30.3642	35.0656	42.4192	49.9661	58.3247	72.3909	90.6407	136.622
0.978276	2.00389	3.1745	4.43652	5.76616	7.10269	8.80473	10.6056	12.4149	14.6495	16.9125	19.5693	22.4594	26.0263	30.3683	35.0984	42.474	49.9722	58.4233	72.4223	91.0168	137.082
0.980488	2.0046	3.17925	4.43652	5.76616	7.12732	8.8166	10.6214	12.4247	14.6517	16.932	19.6317	22.5037	26.0364	30.4292	35.122	42.5048	49.988	58.7025	72.4475	91.0697	137.727
0.980635	2.01201	3.18029	4.43652	5.77933	7.13672	8.85032	10.6533	12.442	14.6545	16.9333	19.6405	22.5077	26.0533	30.4453	35.1572	42.5203	50.0486	58.8132	72.5258	91.1624	137.739
0.984375	2.01466	3.18387	4.44596	5.78905	7.15367	8.85083	10.6842	12.4443	14.6705	16.9705	19.7039	22.5202	26.0627	30.4815	35.202	42.5319	50.2248	58.9131	72.5413	91.4563	138.226
0.984375	2.02236	3.19382	4.45241	5.80231	7.15367	8.85816	10.6862	12.4595	14.6875	16.971	19.717	22.5683	26.0899	30.5285	35.2096	42.6187	50.2688	59.0241	72.5977	91.6824	138.774
0.984375	2.02599	3.19546	4.45695	5.82228	7.15903	8.86777	10.6982	12.4642	14.7418	16.9775	19.7272	22.5723	26.1045	30.5455	35.2206	42.7293	50.2814	59.1777	72.6457	92.4736	138.893
0.984375	2.02762	3.19922	4.45695	5.82354	7.1748	8.91471	10.7018	12.4799	14.744	16.9981	19.7736	22.6167	26.1428	30.5464	35.2902	42.798	50.3928	59.3392	72.7614	92.4884	139.664
0.984375	2.02934	3.20079	4.45964	5.83403	7.18565	8.91729	10.7092	12.4955	14.7691	16.9993	19.8178	22.6393	26.1601	30.5832	35.2912	42.898	50.4642	59.3663	72.9372	92.8869	140.394
0.984375	2.02934	3.20533	4.47053	5.83833	7.19864	8.94746	10.7151	12.5024	14.7861	17.0246	19.8567	22.6887	26.2092	30.6014	35.3978	43.0498	50.5883	59.4589	73.1082	92.9498	140.783
0.985516	2.03935	3.20702	4.47781	5.83833	7.20079	8.95795	10.7213	12.5039	14.7982	17.0867	19.9243	22.7406	26.2589	30.6345	35.3982	43.1438	50.607	59.6543	73.6073	93.0628	140.9
0.985813	2.04545	3.20867	4.50199	5.84303	7.21862	8.96085	10.7213	12.5135	14.8102	17.1013	19.9289	22.8337	26.2814	30.6681	35.4097	43.2061	50.7241	59.8291	74.046	93.1217	142.002
0.988	2.04545	3.23686	4.51054	5.84958	7.22097	8.96504	10.7501	12.5248	14.8154	17.1286	19.938	22.8801	26.3572	30.6829	35.4529	43.3698	50.7335	59.8878	74.088	93.1627	143.011
0.992188	2.05728	3.24216	4.51768	5.87515	7.23175	8.9669	10.7693	12.5315	14.8245	17.1367	19.9384	22.9068	26.365	30.7942	35.4819	43.4716	50.8123	60.1376	74.1984	93.2552	143.067
0.992188	2.06285	3.24593	4.52864	5.8764	7.23868	8.97645	10.8052	12.5339	14.8337	17.1914	19.9397	22.9503	26.3745	30.8063	35.5816	43.5906	50.8766	60.1965	74.2257	93.2929	143.114
0.992188	2.06546	3.25949	4.53774	5.88718	7.25677	8.98158	10.8113	12.5471	14.8393	17.2124	19.9634	22.9603	26.4193	30.8247	35.602	43.6293	50.8956	60.2105	74.2327	93.7733	143.417
0.99333	2.07092	3.26216	4.53774	5.9165	7.26668	8.98472	10.8371	12.5503	14.8686	17.2195	19.9809	22.9689	26.541	30.8763	35.6118	43.6912	50.8962	60.3336	74.4412	93.7979	143.443
1.00026	2.07633	3.26255	4.54237	5.92034	7.26706	8.98651	10.8632	12.5532	14.9245	17.2266	19.9936	23.0081	26.5675	30.8789	35.6432	43.7829	50.9176	60.3432	74.5611	93.8405	145.255
1.00039	2.07884	3.26723	4.56029	5.92672	7.30151	8.98874	10.8743	12.5601	14.9396	17.2792	20.01	23.0575	26.6191	30.8943	35.6912	43.8129	51.0364	60.642	74.6959	93.984	145.287
1.00183	2.08599	3.26928	4.56029	5.92672	7.31689	9.00052	10.8903	12.5606	14.9429	17.3195	20.0185	23.087	26.646	30.9199	35.7532	43.8842	51.0429	60.7333	75.1131	94.2928	145.441
1.00357	2.08691	3.27868	4.56029	5.92672	7.31733	9.00664	10.9166	12.5725	14.9487	17.3387	20.0188	23.1568	26.6622	30.9478	35.7641	43.8883	51.053	60.7408	75.4019	94.4631	145.535
1.0084	2.08817	3.28021	4.57376	5.92672	7.32065	9.00846	10.917	12.5748	14.9491	17.3503	20.027	23.1715	26.6955	31.0196	35.7686	43.8952	51.4636	60.7852	75.443	94.6313	145.61
1.0096	2.08817	3.2833	4.58066	5.9291	7.32474	9.02372	10.9283	12.5803	14.9606	17.3522	20.0313	23.2292	26.6967	31.1221	35.8469	43.9176	51.5941	60.8031	75.4834	94.7253	145.738
1.00996	2.09071	3.28692	4.59741	5.95221	7.33422	9.0253	10.9394	12.6017	14.9764	17.3684	20.1224	23.2371	26.7867	31.206	35.8493	43.9599	51.7008	61.0124	75.5201	95.1467	146.151
1.01157	2.09166	3.29518	4.59812	5.98904	7.34168	9.0253	10.9413	12.6103	14.9858	17.3806	20.1444	23.2397	26.8513	31.2074	36.3969	44.0123	51.706	61.0124	75.5351	95.2586	146.259
1.01314	2.0932	3.30169	4.63336	5.99277	7.35107	9.027	10.9891	12.6145	15.0738	17.4049	20.1533	23.246	26.8556	31.2549	36.4219	44.057	51.8744	61.0734	75.8245	95.3095	147.214
1.01445	2.09482	3.30169	4.64192	5.99413	7.3695	9.03966	10.9891	12.6373	15.0874	17.4077	20.1987	23.2758	26.8738	31.2705	36.4227	44.1274	51.8954	61.122	76.0362	95.3606	148.035
1.01467	2.09524	3.30936	4.65869	5.99621	7.3746	9.04311	10.9944	12.6412	15.0936	17.4384	20.2172	23.3504	26.8837	31.272	36.5803	44.1798	51.9294	61.1284	76.0665	95.4038	148.09
1.01467	2.10046	3.31085	4.65944	6.00791	7.38418	9.05274	11.0052	12.648	15.1101	17.5322	20.2255	23.353	26.8862	31.3149	36.7193	44.2449	51.9361	61.2027	76.1649	95.5042	148.166
1.01467	2.10263	3.31085	4.66038	6.0185	7.38691	9.07549	11.0194	12.6685	15.1227	17.5499	20.2351	23.3736	26.8952	31.3188	36.7529	44.2982	51.998	61.2028	76.1894	96.2036	148.445
1.01467	2.10263	3.31386	4.6663	6.01985	7.39995	9.08376	11.0195	12.7043	15.1426	17.567	20.2531	23.3793	26.9704	31.3497	36.763	44.314	52.1144	61.3239	76.2418	96.7145	148.468
1.01467	2.10263	3.31808	4.66811	6.02707	7.40329	9.09693	11.0537	12.7222	15.1781	17.5714	20.2626	23.4206	27.0473	31.3855	36.7963	44.4504	52.1372	61.3761	76.9144	96.8653	149.491
1.01467	2.10263	3.32465	4.6693	6.03125	7.41899	9.0977	11.0624	12.7237	15.1802	17.6109	20.3208	23.439	27.1595	31.5361	36.8399	44.5283	52.1516	61.5372	77.0336	97.1036	149.905
1.01467	2.10488	3.3279	4.70148	6.03623	7.47718	9.10879	11.0833	12.728	15.2121	17.6434	20.3471	23.4755	27.176	31.5457	36.9059	44.5527	52.1545	61.8484	77.1263	97.2397	152.825
1.01467	2.10551	3.33353	4.70161	6.06531	7.48465	9.1091	11.0842	12.7447	15.2139	17.645	20.3807	23.5174	27.1819	31.6024	36.9135	44.56	52.1589	61.9332	77.1954	97.4994	162.543
1.01467	2.11175	3.33871	4.70187	6.06761	7.49169	9.12197	11.1043	12.7969	15.2413	17.6602	20.3984	23.541	27.2769	31.6183	36.9152	44.6919	52.1928	61.9653	77.2252	97.5233	164.481
1.01467	2.11276	3.34724	4.70878	6.07807	7.50081	9.13203	11.1262	12.847	15.2575	17.7405	20.4939	23.5971	27.281	31.6199	37.0757	44.7638	52.2815	62.0322	77.3994	97.5243	166.035
1.01474	2.11578	3.34724	4.7108	6.07942	7.51936	9.13535	11.1468	12.8642	15.2686	17.741	20.5687	23.6248	27.281	31.6588	37.0892	44.8296	52.3432	62.0513	77.4226	97.6332	167.017
1.01702	2.11698	3.38498	4.71308	6.08668	7.54406	9.15394	11.1587	12.9641	15.2993	17.7461	20.5745	23.6372	27.2906	31.6738	37.0918	44.8904	52.4928	62.0898	77.5883	98.0751	169.468
1.01744	2.11698	3.39568	4.72731	6.09299	7.5491	9.15522	11.1614	12.9749	15.3202	17.7652	20.6759	23.6596	27.2959	31.728	37.1423	44.9005	52.5535	62.0954	77.8903	98.237	170.013
1.01858	2.11698	3.41256	4.73371	6.09299	7.5706	9.17083	11.165	13.1179	15.3932	17.811	20.6909	23.6957	27.3253	31.7933	37.1463	44.9513	52.7726	62.2321	77.9539	98.2592	171.212
1.01872	2.11931	3.41884	4.73371	6.09427	7.58113	9.20785	11.1806	13.1655	15.4118	17.8608	20.6967	23.782	27.3685	31.8085	37.2456	44.9598	52.814	62.3432	78.0214	98.2999	171.395
1.02233	2.12557	3.41884	4.74038	6.10115	7.62129	9.21411	11.1891	13.1891	15.4151	17.8956	20.7086	23.8162	27.455	31.8343	37.3369	45.0702	52.9711	62.4937	78.1711	98.3048	171.753
1.02272	2.1301	3.42769	4.75286	6.11192	7.62592	9.21477	11.1932	13.1899	15.4265	17.9213	20.7646	23.8522	27.4928	31.9211	37.533	45.0842	53.3246	62.6385	78.2713	98.578
1.02272	2.13021	3.43228	4.75286	6.1212	7.63354	9.22765	11.196	13.1907	15.4589	17.9213	20.8033	23.8609	27.5186	31.9653	37.6783	45.2257	53.351	62.7088	78.3476	98.8982
1.02272	2.13184	3.4332	4.76365	6.12631	7.66348	9.25788	11.2061	13.2046	15.5351	17.9466	20.812	23.8749	27.5369	31.9696	37.8841	45.2412	53.4517	62.8624	78.365	98.9395
1.02272	2.13378	3.43793	4.775	6.13634	7.693	9.27112	11.2066	13.277	15.5532	17.961	20.8933	23.8749	27.5814	32.0985	37.9056	45.3814	53.4766	63.0625	78.4333	98.9903
1.02272	2.13537	3.44531	4.77828	6.15649	7.70145	9.3386	11.2079	13.2778	15.6248	17.9641	20.9264	23.8757	27.605	32.1532	37.9969	45.4627	53.4885	63.2762	78.68	99.159
1.02272	2.13926	3.44598	4.77828	6.16136	7.70218	9.36746	11.2089	13.2954	15.6287	17.9827	20.9541	23.8997	27.6349	32.3575	38.1073	45.5418	53.5761	63.3093	78.6899	99.3999
1.02272	2.14197	3.44834	4.77828	6.16709	7.70395	9.39679	11.2236	13.2972	15.729	18.0047	20.9643	23.9211	27.6382	32.3795	38.1581	45.6078	53.6264	63.3399	78.7535	99.7141
1.02272	2.14256	3.45409	4.78756	6.18535	7.70544	9.41746	11.2243	13.3031	15.7419	18.0112	20.9888	23.9465	27.6602	32.4569	38.1724	45.6855	53.6383	63.5689	78.8054	99.8101
1.03218	2.14755	3.45409	4.79488	6.19276	7.7275	9.42253	11.2263	13.3209	15.7534	18.0258	20.9889	24.0474	27.7101	32.4758	38.2523	45.8937	53.7725	63.7587	78.8252	99.9444
1.03311	2.14785	3.45489	4.79721	6.22573	7.73092	9.42513	11.2339	13.3386	15.7588	18.0882	21.0061	24.0619	27.7243	32.5639	38.3218	45.9074	53.9209	63.7955	78.9037	100.255
1.03544	2.14898	3.45489	4.81668	6.24005	7.73725	9.43004	11.2545	13.3429	15.8502	18.096	21.0234	24.0746	27.8641	32.5921	38.5722	45.9412	53.9456	64.0714	79.0034	100.369
1.03583	2.15504	3.45489	4.81671	6.25591	7.75283	9.45328	11.3158	13.3868	15.9126	18.1326	21.0277	24.1065	27.8918	32.6618	38.5916	45.9442	53.9498	64.2083	79.0057	100.473
1.04024	2.15647	3.45855	4.83597	6.25606	7.75951	9.47061	11.3309	13.4037	15.9394	18.1526	21.0284	24.1167	27.8964	32.7232	38.7025	46.0286	54.0449	64.2135	79.1472	100.528
1.0418	2.16405	3.46346	4.84662	6.26464	7.78268	9.47387	11.3444	13.4244	15.9411	18.1617	21.0333	24.1379	27.9543	32.7518	38.8769	46.0382	54.1096	64.4418	79.3022	101.363
1.04409	2.16633	3.4694	4.84748	6.27418	7.78883	9.48929	11.3453	13.4266	15.9428	18.181	21.0473	24.1886	27.9689	32.7518	38.9373	46.052	54.1457	64.477	79.3327	101.973
1.04409	2.17881	3.47192	4.84748	6.27418	7.7977	9.49296	11.3517	13.4397	15.9582	18.2019	21.1033	24.2452	27.9909	32.7747	38.9524	46.0592	54.2925	64.4922	79.3668	102.205
1.04409	2.18327	3.48029	4.85475	6.27418	7.8063	9.49616	11.3805	13.4419	15.9646	18.2027	21.1396	24.2471	28.0428	32.7836	38.9769	46.1306	54.307	64.4972	79.4391	102.542
1.04409	2.18918	3.4815	4.85673	6.27418	7.84626	9.51701	11.4003	13.4815	15.9802	18.2696	21.1655	24.2686	28.083	32.8365	39.1023	46.165	54.3934	64.5303	79.5431	102.728
1.04409	2.19524	3.48854	4.85765	6.27514	7.85832	9.53367	11.4048	13.4884	15.9845	18.2964	21.2815	24.3288	28.0956	32.8459	39.1049	46.31	54.4579	64.629	79.5811	102.771
1.04668	2.19742	3.49006	4.85846	6.27711	7.87964	9.56935	11.4414	13.4974	16.005	18.3238	21.2883	24.3424	28.1069	32.9409	39.1241	46.4967	54.4735	65.0358	79.7724	102.997
1.04726	2.201	3.49051	4.86013	6.28355	7.88382	9.57373	11.4732	13.5013	16.0355	18.3451	21.3037	24.3868	28.1181	32.9582	39.2804	46.528	54.5002	65.2495	80.0263	103.542
1.05237	2.20113	3.49139	4.86275	6.28865	7.88464	9.57474	11.5343	13.5282	16.0389	18.3465	21.3104	24.5044	28.1431	32.9929	39.3556	46.5904	54.6239	65.3331	80.0331	103.862
1.05272	2.20113	3.49418	4.87401	6.29692	7.89736	9.57724	11.5349	13.5351	16.049	18.4038	21.3167	24.5169	28.1702	33.0826	39.4649	46.6125	54.6805	65.5511	80.2802	104.116
1.05319	2.20113	3.4959	4.87716	6.29937	7.92483	9.59254	11.5415	13.5553	16.0893	18.411	21.3567	24.5611	28.3558	33.1616	39.5406	46.6216	54.7465	65.7199	80.3231	104.224
1.05329	2.20113	3.49765	4.88415	6.30844	7.93599	9.61027	11.569	13.6132	16.091	18.4148	21.3691	24.5663	28.3788	33.1716	39.6604	46.6651	54.7495	65.8106	80.6949	104.365
1.05451	2.20401	3.49765	4.88482	6.32407	7.93628	9.64396	11.569	13.6809	16.0991	18.4162	21.3908	24.5679	28.4114	33.1852	39.6966	46.7853	54.7811	65.931	81.3295	104.389
1.05485	2.2074	3.49861	4.88482	6.32705	7.93628	9.647	11.5799	13.7467	16.1224	18.4209	21.3933	24.6367	28.4188	33.2281	39.6975	46.8254	54.9682	66.0406	81.3416	104.54
1.05569	2.20817	3.49992	4.89031	6.35094	7.9538	9.65114	11.5823	13.7526	16.1377	18.4433	21.4098	24.6447	28.4447	33.246	39.712	46.8846	54.9853	66.1044	81.3912	105.215
1.06262	2.20862	3.50173	4.90233	6.36031	7.96436	9.6603	11.5892	13.7526	16.1559	18.498	21.4991	24.6454	28.4487	33.2591	39.7609	46.9086	55.0375	66.2085	81.4135	105.299
1.06424	2.21211	3.50497	4.91318	6.36512	7.96747	9.68258	11.6062	13.7861	16.1824	18.5242	21.5387	24.6684	28.4491	33.4516	39.9347	46.9573	55.0625	66.3705	81.4436	105.402
1.06968	2.21738	3.52541	4.91538	6.36538	7.9927	9.68507	11.6082	13.787	16.2496	18.5455	21.6065	24.6895	28.4575	33.497	39.9615	46.991	55.0794	66.4626	81.4892	105.462
1.07065	2.21816	3.53276	4.92188	6.37083	7.99405	9.68654	11.6102	13.7907	16.2551	18.5953	21.6083	24.7235	28.4654	33.568	39.9755	46.9948	55.2753	66.4627	81.5486	105.535
1.07356	2.2186	3.53787	4.92273	6.37547	8.00916	9.72601	11.6186	13.8558	16.2652	18.6011	21.6689	24.7872	28.5076	33.5756	40.0286	47.0097	55.3585	66.4659	81.9478	106.121
1.07564	2.2186	3.54001	4.92802	6.38897	8.01004	9.73084	11.6238	13.8559	16.2821	18.634	21.6702	24.8245	28.5405	33.5928	40.1022	47.0547	55.4211	66.54	81.9507	106.395
1.07809	2.22243	3.54921	4.92802	6.39688	8.0309	9.75103	11.6339	13.8574	16.2926	18.6445	21.675	24.8505	28.576	33.6069	40.1416	47.0629	55.4277	66.5705	82.2152	106.951
1.0798	2.22638	3.55149	4.95961	6.40644	8.03381	9.76034	11.6489	13.8885	16.2943	18.7047	21.685	24.8859	28.5771	33.6393	40.2129	47.094	55.4765	66.6866	82.2936	107.118
1.08187	2.22847	3.55149	4.96085	6.41652	8.05519	9.76701	11.6843	13.8885	16.2954	18.7346	21.7053	24.9258	28.6168	33.6412	40.3095	47.2666	55.5669	66.7581	82.3017	107.433
1.08235	2.22847	3.56168	4.96094	6.41734	8.05536	9.78494	11.6844	13.9405	16.2962	18.8215	21.7065	24.9297	28.6277	33.7073	40.3624	47.3754	55.5682	66.8356	82.6538	107.524
1.08295	2.22847	3.5629	4.96871	6.42081	8.05631	9.84718	11.6914	13.9753	16.3017	18.8226	21.8568	24.9515	28.6803	33.7184	40.3781	47.4048	55.5841	66.932	83.0172	108.147
1.08862	2.22903	3.57144	4.97072	6.43124	8.07298	9.85605	11.694	13.9789	16.3092	18.8451	21.8636	25.0024	28.7128	33.9753	40.4089	47.4138	55.6177	67.0025	83.3357	108.217
1.08872	2.23332	3.57809	4.97909	6.43462	8.09397	9.87526	11.7359	13.9821	16.3523	18.8471	21.8672	25.0121	28.7312	33.9773	40.4753	47.523	55.6195	67.2226	83.449	108.467
1.08909	2.23881	3.58052	4.98216	6.43967	8.09495	9.87796	11.7525	14.0182	16.3611	18.8635	21.9159	25.0579	28.8419	34.0697	40.492	47.5344	55.689	67.2287	83.4737	109.196
1.0908	2.26159	3.58118	4.98302	6.44089	8.09951	9.88119	11.7742	14.0541	16.4011	18.9024	21.92	25.1558	28.9599	34.0781	40.4949	47.5369	55.7004	67.3666	83.4783	109.322
1.09446	2.26887	3.58318	4.98584	6.44922	8.09991	9.90549	11.7766	14.0737	16.4171	18.912	21.9653	25.1924	29.0214	34.0929	40.5263	47.549	55.7118	67.4	83.5388	109.582
1.09496	2.26887	3.58621	4.98688	6.45145	8.10917	9.93657	11.7922	14.0835	16.4261	18.9756	22.0179	25.2167	29.0734	34.1033	40.5547	47.6526	55.8069	67.4768	83.5881	109.643
1.09589	2.26887	3.58786	4.9908	6.45399	8.12482	9.94014	11.8122	14.1186	16.4407	18.9794	22.0561	25.2183	29.0734	34.1234	40.5866	47.6743	55.9722	67.5916	83.8092	109.965
1.09927	2.26887	3.60213	5.00572	6.45967	8.13486	9.96647	11.8289	14.1484	16.4554	19.0384	22.069	25.2262	29.2131	34.1376	40.7008	47.7037	55.984	67.7813	83.8718	110.287
1.09933	2.26887	3.60553	5.00638	6.48319	8.13725	9.96812	11.8696	14.1624	16.457	19.0601	22.075	25.2557	29.2902	34.1602	40.7512	47.7544	56.0975	68.0221	84.3728	110.845
1.09986	2.27248	3.6134	5.01363	6.49117	8.14597	9.98245	11.8743	14.1933	16.4971	19.1079	22.0864	25.2594	29.3275	34.2579	40.7789	47.7612	56.3215	68.258	84.3998	111.752
1.10056	2.28224	3.61545	5.02166	6.50357	8.15087	9.99909	11.9023	14.1976	16.5298	19.1131	22.1221	25.3137	29.3365	34.279	40.7922	47.7847	56.3265	68.3281	84.5738	112.155
1.10056	2.28688	3.62285	5.04065	6.53687	8.15087	9.99909	11.9378	14.2054	16.5407	19.1393	22.1826	25.3472	29.5329	34.3131	40.844	47.7881	56.3469	68.3459	84.6165	112.16
1.10056	2.28688	3.63353	5.04942	6.54	8.1592	9.99992	11.9475	14.2054	16.5438	19.1394	22.1976	25.3489	29.5694	34.3302	41.0472	47.7904	56.3469	68.3459	84.6454	112.418
1.10056	2.28688	3.63353	5.04991	6.57959	8.16558	10.0513	11.9732	14.2388	16.5513	19.1511	22.2037	25.387	29.6118	34.3634	41.082	47.8139	56.4176	68.4375	84.6627	112.743
1.10056	2.28688	3.65408	5.064	6.59077	8.18054	10.0822	12.0058	14.2734	16.5524	19.184	22.2439	25.4785	29.6235	34.3678	41.091	47.8474	56.4816	68.6907	84.7435	112.887
1.10056	2.28688	3.65473	5.06738	6.59384	8.18993	10.0823	12.0344	14.2837	16.5561	19.1945	22.2664	25.4844	29.7002	34.4037	41.1749	47.8685	56.5226	68.7989	84.929	113.477
1.10056	2.28743	3.65845	5.07122	6.59877	8.19665	10.0928	12.0765	14.3315	16.607	19.2216	22.2863	25.5488	29.7033	34.4479	41.2709	47.9251	56.6256	69.1427	85.0876	113.722
1.10056	2.30529	3.65845	5.07335	6.60188	8.22121	10.0988	12.1168	14.3496	16.6343	19.2221	22.2945	25.5572	29.7391	34.454	41.2747	47.9501	56.8056	69.2381	85.3832	114.498
1.10056	2.3111	3.6605	5.09668	6.61872	8.22543	10.1001	12.1187	14.3667	16.6564	19.2384	22.3147	25.5795	29.7865	34.4594	41.324	48.069	56.8578	69.2888	85.4711	114.74
1.10056	2.31506	3.66973	5.10045	6.62253	8.22847	10.1018	12.1375	14.3757	16.6631	19.264	22.3156	25.6179	29.8038	34.4774	41.3906	48.1269	57.0179	69.3832	85.5667	115.017
1.10092	2.3173	3.68567	5.10829	6.62628	8.25086	10.1168	12.1487	14.3763	16.6808	19.2649	22.3333	25.6486	29.8688	34.5409	41.4987	48.235	57.0603	69.4141	85.5954	115.534
1.10236	2.32135	3.68736	5.11362	6.63641	8.26273	10.1168	12.153	14.3838	16.7059	19.2857	22.3574	25.6894	29.9163	34.6312	41.6139	48.3103	57.0959	69.4693	85.6209	116.569
1.10436	2.32164	3.68748	5.11362	6.64595	8.27256	10.1467	12.1543	14.4054	16.709	19.3164	22.3672	25.6929	29.9643	34.7016	41.7184	48.3234	57.3404	69.5016	85.6342	116.811
1.10813	2.33079	3.69141	5.11468	6.64909	8.27426	10.1508	12.1561	14.4382	16.7229	19.3229	22.3767	25.7542	29.9712	34.742	41.7486	48.3394	57.3462	69.5641	85.9982	116.833
1.1085	2.33465	3.69757	5.13194	6.6521	8.30976	10.1571	12.1742	14.4567	16.7235	19.3345	22.3999	25.7865	29.9728	34.7433	41.7652	48.3508	57.3657	69.6276	86.0154	117.132
1.1093	2.33465	3.70151	5.13859	6.66457	8.31975	10.1702	12.181	14.4573	16.7668	19.4075	22.4108	25.7999	29.9934	34.7706	41.8359	48.3718	57.3699	69.8035	86.1538	118.047
1.1093	2.34007	3.70619	5.15158	6.71293	8.32728	10.1786	12.1849	14.484	16.7696	19.4127	22.4148	25.8057	29.9962	34.789	41.8793	48.4073	57.4484	69.8096	86.3701	118.121
1.1093	2.34792	3.71121	5.15982	6.71705	8.33	10.1973	12.2437	14.5019	16.7732	19.4211	22.4214	25.8246	30.0424	34.8648	41.9076	48.4957	57.4791	69.93	86.5061	118.484
1.1093	2.34873	3.72407	5.16013	6.71705	8.3686	10.2072	12.2493	14.5185	16.7796	19.4226	22.4572	25.8504	30.0537	34.875	41.9286	48.5872	57.5381	70.2196	86.861	118.993
1.1093	2.34932	3.72943	5.16152	6.71705	8.3743	10.2073	12.2599	14.5208	16.8102	19.4492	22.4771	25.8719	30.0788	34.8881	42.0075	48.7726	57.5823	70.2592	87.0887	119.613
1.1093	2.35318	3.73535	5.16268	6.73752	8.38794	10.2073	12.2661	14.5279	16.8124	19.4848	22.5068	25.9147	30.2427	35.0468	42.0698	49.1449	57.6117	70.357	87.0938	122.849
1.1093	2.35828	3.74341	5.17382	6.75171	8.40469	10.2152	12.2777	14.5321	16.8228	19.5413	22.5686	25.9718	30.2709	35.0707	42.0982	49.1667	57.7041	70.6924	87.1241	122.855
1.10941	2.36025	3.74839	5.17382	6.7625	8.41305	10.2252	12.2929	14.5383	16.8444	19.5442	22.5845	26.0064	30.2732	35.142	42.1286	49.3429	57.8964	70.7946	87.2749	123.482
1.10943	2.36482	3.75073	5.17491	6.76288	8.41899	10.2586	12.2977	14.5895	16.8649	19.569	22.617	26.0328	30.2855	35.1432	42.1307	49.3726	58.0617	70.8806	87.427	124.162
1.11337	2.37235	3.75646	5.18928	6.77205	8.43259	10.2697	12.3152	14.6024	16.8732	19.5849	22.6288	26.0558	30.4381	35.2377	42.1855	49.653	58.0964	71.0136	87.6757	125.913
1.11664	2.37662	3.76451	5.18997	6.78482	8.43354	10.2772	12.3152	14.6136	16.9305	19.5928	22.6727	26.1041	30.5212	35.3099	42.2423	49.6652	58.1515	71.0397	87.8356	126.266
1.12277	2.37739	3.76613	5.19135	6.7887	8.44581	10.2782	12.3167	14.6282	16.9425	19.6042	22.674	26.1078	30.5246	35.3133	42.3582	49.6652	58.2099	71.1071	87.9523	126.31
1.12341	2.37795	3.7706	5.20512	6.7888	8.46636	10.2832	12.3199	14.6378	16.9522	19.6065	22.6743	26.1498	30.5606	35.4631	42.5502	49.675	58.3263	71.1824	88.0522	126.543
1.12659	2.3794	3.77643	5.22044	6.7888	8.46655	10.2941	12.3275	14.6432	16.9929	19.6396	22.7261	26.2247	30.6879	35.5122	42.6019	49.9667	58.367	71.3155	88.0954	127.025
1.12792	2.38114	3.77814	5.22345	6.79273	8.46795	10.2961	12.344	14.648	17.0045	19.6459	22.7474	26.3125	30.6973	35.5582	42.6234	50.1101	58.3717	71.3965	88.1916	127.08
1.12848	2.38195	3.77952	5.23255	6.79443	8.46913	10.3048	12.3454	14.6532	17.0093	19.6495	22.7677	26.3504	30.7452	35.6308	42.6431	50.121	58.4409	71.6627	88.5202	127.295
1.13418	2.38222	3.78627	5.23255	6.79458	8.47725	10.346	12.3903	14.6647	17.0171	19.6724	22.8803	26.4193	30.7853	35.6853	42.6765	50.179	58.4943	71.9377	89.02	127.602
1.13688	2.38407	3.78731	5.25391	6.80048	8.4831	10.3617	12.4142	14.6766	17.0445	19.7354	22.9401	26.4425	30.83	35.6912	42.6803	50.2311	58.6741	71.9861	89.0292	128.023
1.13796	2.39062	3.79439	5.26088	6.80476	8.48451	10.3646	12.4247	14.6985	17.1163	19.7672	22.9735	26.5131	30.8427	35.836	42.7246	50.252	58.718	72.2127	89.3405	128.168
1.13845	2.3941	3.80989	5.26399	6.80662	8.52608	10.387	12.442	14.7274	17.1348	19.7798	22.9989	26.5622	30.8589	35.8395	42.7361	50.4078	58.7731	72.2293	89.4553	128.472
1.14615	2.39686	3.81819	5.2846	6.81649	8.55617	10.3881	12.4507	14.733	17.1598	19.7904	23.0147	26.5865	30.8678	35.874	42.7811	50.4516	58.9463	72.2885	89.5795	128.721
1.14736	2.39756	3.8204	5.29372	6.83769	8.56247	10.3986	12.4539	14.7782	17.1599	19.8291	23.0433	26.592	30.8943	36.0459	42.79	50.629	59.081	72.3934	89.5903	128.819
1.14831	2.39915	3.8204	5.30409	6.85959	8.56879	10.4236	12.4612	14.8352	17.162	19.8378	23.1054	26.6106	30.9127	36.1121	42.9256	50.6379	59.0836	72.6914	89.8812	130.394
1.14888	2.40113	3.82344	5.30843	6.86421	8.58511	10.4237	12.4691	14.8729	17.2095	19.8407	23.1897	26.6191	30.9429	36.1162	43.0201	50.694	59.2366	72.9704	89.8849	130.502
1.15165	2.41213	3.82737	5.31061	6.86949	8.61228	10.4298	12.4722	14.9116	17.2156	19.8788	23.2048	26.6294	30.998	36.1892	43.1124	50.7371	59.433	73.3483	89.9012	130.83
1.1548	2.42374	3.82832	5.31243	6.87855	8.61328	10.4369	12.4913	14.9263	17.2211	19.8864	23.2164	26.7169	31.0188	36.2012	43.1219	50.7991	59.6116	73.3615	89.9412	131.181
1.15718	2.42374	3.83365	5.31308	6.88097	8.61669	10.4467	12.5484	14.9468	17.2516	19.9115	23.2633	26.7527	31.0649	36.2023	43.2321	50.8405	59.6766	73.5265	90.1096	131.207
1.15886	2.43044	3.83676	5.31435	6.89177	8.62227	10.4651	12.5815	14.9569	17.267	19.9208	23.2821	26.7732	31.085	36.2059	43.481	50.8423	59.8716	73.533	90.1422	131.385
1.16704	2.43254	3.83839	5.31614	6.89195	8.62832	10.4655	12.5888	14.9651	17.2727	19.9579	23.319	26.8152	31.1199	36.2393	43.5533	50.8986	59.8716	73.608	90.2198	131.469
1.16762	2.43382	3.84218	5.31643	6.89502	8.64064	10.5058	12.5917	14.9693	17.2933	19.9956	23.337	26.8176	31.1384	36.2828	43.5816	50.8992	59.8959	73.7329	90.2463	131.95
1.16991	2.4362	3.84596	5.33363	6.89566	8.65325	10.5363	12.6095	15.0117	17.3151	19.9982	23.3478	26.8827	31.171	36.3153	43.6081	50.9265	59.9429	73.7809	90.2684	131.951
1.16993	2.43894	3.85198	5.3388	6.89678	8.65494	10.5467	12.6157	15.0286	17.3236	20.0037	23.3595	26.8964	31.185	36.3894	43.6426	50.9843	59.9808	73.8519	90.3754	132.028
1.16999	2.44298	3.85198	5.34309	6.89803	8.6639	10.5496	12.6344	15.0479	17.3513	20.0178	23.4255	26.9097	31.4166	36.4418	43.7057	51.0797	60.059	73.8872	90.7576	132.71
1.17151	2.44406	3.86204	5.34525	6.90643	8.6639	10.5539	12.6371	15.0745	17.3542	20.0306	23.4373	26.9114	31.438	36.4823	43.7777	51.1154	60.0597	73.9077	90.8215	132.801
1.17184	2.45414	3.86253	5.34977	6.91174	8.68983	10.5572	12.6392	15.1213	17.3684	20.0556	23.4484	26.9679	31.4484	36.4876	43.795	51.2088	60.0689	73.9171	90.9316	133.35
1.17415	2.45797	3.88163	5.3525	6.91866	8.69162	10.5595	12.6429	15.1643	17.3703	20.0779	23.4926	26.9875	31.5166	36.5773	43.8011	51.2579	60.3371	73.9868	91.3883	134.184
1.17666	2.46094	3.88312	5.3546	6.93006	8.69199	10.5639	12.6892	15.1717	17.3764	20.0993	23.5042	27.0217	31.5202	36.6613	43.8543	51.4642	60.3793	74.0611	91.4398	134.397
1.17916	2.46173	3.88501	5.36303	6.94752	8.69725	10.5753	12.6936	15.1815	17.4015	20.1106	23.5352	27.0401	31.6228	36.899	43.8772	51.6381	60.4269	74.1444	91.5422	134.495
1.18623	2.46365	3.88615	5.36488	6.9521	8.69902	10.5849	12.7158	15.187	17.4075	20.1713	23.5369	27.0644	31.6345	36.915	43.88	51.6773	60.4502	74.1641	91.5472	135.678
1.19462	2.46551	3.89108	5.36492	6.95279	8.71347	10.602	12.7376	15.2175	17.4078	20.2171	23.5383	27.0943	31.6872	37.0093	43.8958	51.7482	60.7976	74.5297	91.7692	136.184
1.19835	2.46875	3.90085	5.36978	6.95365	8.71791	10.614	12.7421	15.2257	17.4154	20.2312	23.5955	27.0955	31.688	37.0843	43.9138	51.8137	60.8663	74.5416	91.8645	136.657
1.20165	2.46894	3.90606	5.37259	6.95564	8.72916	10.6249	12.7456	15.2302	17.4552	20.2588	23.6163	27.0974	31.7539	37.1903	43.9801	51.875	60.9247	74.7297	92.2172	136.932
1.20333	2.46949	3.9064	5.38912	6.95783	8.73429	10.6545	12.769	15.2564	17.4921	20.3163	23.6281	27.1428	31.7547	37.2017	44.0508	51.875	60.9299	74.7935	92.3721	136.956
1.21303	2.47321	3.91083	5.39726	6.95922	8.73765	10.6627	12.7746	15.2598	17.4953	20.3686	23.6301	27.1507	31.7683	37.4017	44.0535	51.9275	61.0519	74.876	92.8322	137.091
1.21854	2.47374	3.91124	5.39726	6.96058	8.73859	10.6681	12.8019	15.2629	17.5487	20.4505	23.6309	27.1965	31.8089	37.4815	44.0755	51.9695	61.1826	74.9112	92.9238	137.889
1.2199	2.47883	3.92519	5.39738	6.96493	8.74234	10.7284	12.8256	15.2657	17.5746	20.4758	23.6339	27.2361	31.8133	37.496	44.0759	51.998	61.22	74.9811	93.261	138.1
1.22264	2.48047	3.93184	5.43287	6.98506	8.75092	10.7409	12.8435	15.3076	17.6157	20.5104	23.6621	27.2651	31.8263	37.5073	44.0907	51.9998	61.22	75.059	93.5266	138.486
1.22527	2.48047	3.9375	5.43404	6.98506	8.77444	10.7439	12.8455	15.3088	17.6337	20.516	23.67	27.2776	31.8385	37.6556	44.1142	52.0097	61.3361	75.0602	93.5535	138.913
1.22812	2.48047	3.94297	5.44574	6.98767	8.77679	10.7439	12.8512	15.3098	17.6434	20.528	23.6829	27.2795	31.8559	37.6615	44.1252	52.0137	61.3924	75.1156	93.9849	139.014
1.22847	2.49003	3.94518	5.46417	6.99161	8.80452	10.7798	12.8795	15.356	17.6892	20.5718	23.7197	27.2966	31.8794	37.7565	44.2052	52.109	61.6493	75.1427	94.1462	139.391
1.22859	2.49284	3.94774	5.46431	6.99774	8.80491	10.8113	12.8903	15.3781	17.6936	20.5853	23.7503	27.2976	31.9191	37.7829	44.2401	52.131	61.7358	75.1894	94.1462	139.598
1.23047	2.50423	3.96321	5.46452	7.00266	8.84483	10.8717	12.8935	15.4287	17.7228	20.602	23.7828	27.312	31.9922	37.8376	44.2502	52.1359	61.7421	75.2729	94.3063	140.35
1.23047	2.50549	3.96814	5.51999	7.00375	8.86268	10.878	12.902	15.4417	17.7261	20.6558	23.7879	27.3239	32.0919	37.8802	44.402	52.2008	62.0241	75.467	94.4131	140.431
1.23047	2.50659	3.96814	5.52207	7.00429	8.86399	10.8835	12.9045	15.4933	17.7341	20.6871	23.791	27.3257	32.1155	37.9544	44.402	52.3202	62.1845	75.5239	94.4705	140.559
1.23047	2.50837	3.97577	5.53027	7.00713	8.87304	10.9056	12.9085	15.4985	17.7615	20.7059	23.8106	27.3493	32.1367	38.0462	44.445	52.4689	62.2306	75.5608	94.5006	140.628
1.23047	2.51025	3.97737	5.53561	7.015	8.88189	10.9169	12.9193	15.4986	17.7659	20.7085	23.8139	27.4352	32.1715	38.0523	44.4469	52.4715	62.7327	75.5832	94.526	141.39
1.23047	2.51094	3.98482	5.54392	7.01566	8.88942	10.9356	12.965	15.5117	17.7668	20.7167	23.8241	27.4382	32.1745	38.083	44.4838	52.6353	62.7672	75.607	94.8486	142.313
1.23047	2.51104	3.99127	5.5465	7.01943	8.89008	10.9592	12.9682	15.5354	17.8263	20.726	23.8399	27.4712	32.1898	38.1056	44.4873	52.7381	62.9052	75.6185	94.8571	142.762
1.23047	2.52505	3.99498	5.5465	7.02021	8.89349	10.9643	12.9871	15.547	17.8278	20.7388	23.8406	27.4896	32.25	38.1228	44.5022	52.799	62.9731	75.7957	94.8662	142.911
1.23047	2.52896	3.99964	5.55213	7.02459	8.89349	10.9814	12.9991	15.5527	17.8285	20.7788	23.9015	27.5507	32.3135	38.1323	44.6489	52.8346	63.0658	75.8113	94.8748	143.5
1.23047	2.53248	3.99964	5.56479	7.03443	8.90229	10.9881	13.0019	15.5578	17.8462	20.7902	23.9066	27.5592	32.336	38.2966	44.7835	52.8781	63.0897	75.9135	95.2767	144.449
1.23047	2.53269	3.99964	5.56506	7.03718	8.91729	11.0194	13.0071	15.5665	17.8578	20.8033	23.9659	27.5825	32.4013	38.3298	44.7951	52.9016	63.2257	76.2418	95.5864	144.53
1.2319	2.53369	4.00036	5.56673	7.03813	8.91729	11.0304	13.0146	15.5726	17.8808	20.8034	23.985	27.6419	32.4053	38.3472	44.9598	52.9245	63.2951	76.336	95.6352	145.054
1.23865	2.53967	4.00047	5.56847	7.03845	8.93313	11.0397	13.0151	15.5792	17.8937	20.8444	24.039	27.6437	32.4415	38.4411	44.9679	52.9376	63.3093	76.3424	95.6517	149.768
1.23985	2.54345	4.00087	5.56982	7.06325	8.93824	11.049	13.0412	15.5911	17.9105	20.8532	24.0418	27.6836	32.4578	38.4752	44.9729	52.9674	63.4259	76.5569	95.7137	156.02
1.24023	2.54364	4.00244	5.5709	7.07703	8.94205	11.0624	13.0436	15.5947	17.9473	20.8756	24.077	27.7464	32.5214	38.6311	45.0728	53.0114	63.5066	76.9334	95.7997	156.538
1.24023	2.54609	4.00444	5.57224	7.08294	8.94396	11.0765	13.0549	15.6298	17.959	20.9302	24.081	27.7824	32.6624	38.6378	45.1372	53.0268	63.7497	77.0592	95.8768	159.379
1.24023	2.5489	4.0058	5.573	7.08492	8.94517	11.0852	13.0851	15.6478	17.9918	20.9353	24.1009	27.7968	32.666	38.8155	45.1446	53.089	63.7504	77.0666	95.928	159.914
1.24023	2.54987	4.00612	5.57359	7.09106	8.9469	11.0881	13.144	15.6586	18.0523	20.9697	24.1065	27.8379	32.7092	38.8826	45.2683	53.1386	63.9004	77.175	96.9131	161.618
1.24023	2.55037	4.00612	5.57933	7.09667	8.95521	11.1424	13.2095	15.6961	18.1103	21.0383	24.2374	27.9775	32.7221	38.8834	45.4868	53.1568	63.9242	77.2299	97.1216	162.964
1.24023	2.55268	4.00732	5.59024	7.10676	8.96012	11.1428	13.2305	15.698	18.1106	21.0552	24.2592	28.0892	32.7848	38.9017	45.4996	53.1882	63.9475	77.2656	97.3891	164.4
1.2434	2.5538	4.01077	5.59408	7.11153	8.96416	11.1555	13.2336	15.7133	18.1305	21.091	24.2636	28.1388	32.8441	38.9315	45.5406	53.2666	64.0874	77.3302	97.4559	165.061
1.24517	2.5538	4.01594	5.60185	7.1268	8.96852	11.1805	13.2502	15.7646	18.151	21.1278	24.3075	28.1601	32.8819	38.9406	45.5513	53.2684	64.2135	77.3502	98.0148	165.449
1.24773	2.56929	4.01652	5.61156	7.14096	8.96905	11.1825	13.2526	15.7673	18.2061	21.2497	24.3383	28.2031	32.903	38.949	45.5555	53.2837	64.2281	77.5335	98.0247	165.609
1.24929	2.56929	4.01863	5.6118	7.15367	9.03328	11.1833	13.2529	15.7827	18.2117	21.2497	24.3798	28.244	32.9184	39.0414	45.6078	53.3891	64.2512	77.8703	98.1047
1.25484	2.56929	4.02894	5.61634	7.15367	9.03883	11.2236	13.2913	15.7917	18.2651	21.2988	24.5472	28.2676	32.938	39.0631	45.745	53.4228	64.2606	78.1029	98.6136
1.25484	2.57179	4.03068	5.61804	7.16636	9.06249	11.2253	13.3067	15.7919	18.2906	21.3067	24.5613	28.3359	32.9581	39.0693	45.7943	53.4301	64.2738	78.2921	99.1492
1.25484	2.58563	4.03624	5.61977	7.18326	9.07883	11.2263	13.3116	15.8128	18.3347	21.359	24.5679	28.3788	33.0454	39.0739	45.8483	53.4454	64.3779	78.3791	99.2954
1.25484	2.58969	4.03791	5.62322	7.20528	9.11359	11.2308	13.3231	15.8165	18.3463	21.3698	24.609	28.4606	33.0683	39.0833	45.8937	53.4709	64.5289	78.5394	99.7248
1.25484	2.59214	4.03941	5.63024	7.21446	9.11876	11.2461	13.3347	15.8214	18.3666	21.3853	24.6281	28.4715	33.1474	39.1297	45.9226	53.527	64.6665	78.658	99.8913
1.25484	2.59524	4.04497	5.63135	7.25582	9.12057	11.2535	13.3347	15.8227	18.4374	21.4232	24.6427	28.4804	33.2163	39.1667	46.1354	53.5994	64.7245	78.7723	100.254
1.25484	2.59838	4.0483	5.63205	7.25708	9.12756	11.281	13.3525	15.842	18.4439	21.4257	24.6505	28.5378	33.3206	39.1797	46.1975	53.6688	64.7671	78.8219	100.334
1.25484	2.59868	4.05838	5.65968	7.26146	9.12965	11.2869	13.3644	15.8515	18.4721	21.4836	24.6599	28.5581	33.3584	39.2035	46.215	53.728	65.0439	78.8719	100.447
1.25484	2.60652	4.05868	5.6655	7.26706	9.16303	11.2931	13.3776	15.859	18.4777	21.5035	24.6623	28.5734	33.3848	39.2595	46.3047	53.7843	65.2324	79.013	100.528
1.25484	2.60988	4.05868	5.66721	7.29204	9.16406	11.2936	13.3994	15.8743	18.498	21.5387	24.6744	28.6552	33.3901	39.3238	46.3075	54.0153	65.3868	79.0792	100.685
1.25484	2.61142	4.06403	5.67666	7.32242	9.16582	11.2963	13.4003	15.8801	18.516	21.5401	24.7303	28.7475	33.4179	39.3519	46.329	54.0936	65.4012	79.2445	100.689
1.25484	2.61247	4.07227	5.68152	7.32894	9.16602	11.3007	13.4106	15.8827	18.5198	21.5469	24.7365	28.7552	33.4274	39.5132	46.3559	54.114	65.4461	79.34	100.75
1.25484	2.61524	4.0763	5.6868	7.34168	9.16614	11.303	13.4123	15.8947	18.5274	21.568	24.7688	28.7761	33.4917	39.5884	46.365	54.307	65.628	79.3934	100.751
1.25484	2.62479	4.08538	5.70508	7.34168	9.19165	11.3219	13.4265	15.917	18.5359	21.5981	24.7713	28.7959	33.5047	39.6891	46.506	54.365	65.8267	79.406	100.871
1.25899	2.62529	4.08688	5.71047	7.36512	9.19401	11.332	13.4429	15.9356	18.5506	21.6856	24.7872	28.7966	33.5113	39.7051	46.538	54.4935	65.8364	79.4837	101.159
1.25948	2.62544	4.09089	5.72399	7.36969	9.23121	11.363	13.4531	15.9476	18.5562	21.6884	24.818	28.8183	33.5875	39.7455	46.5586	54.5779	65.8594	79.5401	101.315
1.26075	2.62582	4.09089	5.72834	7.38966	9.24531	11.3692	13.4607	15.9582	18.5618	21.6932	24.8313	28.835	33.5988	39.807	46.6256	54.662	65.8819	79.7704	101.477
1.26121	2.63677	4.09582	5.73201	7.39337	9.25064	11.3711	13.4855	15.9582	18.5649	21.7262	24.8342	28.8703	33.6065	39.9325	46.9884	54.733	66.0803	79.8137	102.022
1.26265	2.63682	4.10591	5.73825	7.3938	9.26305	11.3957	13.4957	15.9758	18.589	21.7586	24.8388	28.9026	33.6888	39.9422	47.0245	54.7823	66.1168	79.8839	102.057
1.26301	2.65051	4.10591	5.73984	7.39696	9.2634	11.4003	13.509	16.0042	18.5944	21.7619	24.8732	28.9242	33.6982	39.9697	47.0271	54.8176	66.3565	80.0337	102.225
1.2648	2.65654	4.12273	5.74921	7.3992	9.26372	11.4202	13.515	16.0139	18.6205	21.8137	24.9151	28.9427	33.7033	40.0612	47.047	55.2173	66.5219	80.1744	103.043
1.2648	2.65884	4.12832	5.75104	7.39995	9.28118	11.4209	13.5341	16.0181	18.6318	21.8291	24.923	28.9618	33.7292	40.1337	47.0687	55.2885	66.5928	80.4318	103.365
1.2648	2.66191	4.13385	5.7535	7.40729	9.33757	11.4313	13.5362	16.0245	18.6548	21.8913	24.9348	28.979	33.8922	40.1749	47.1178	55.3122	66.6284	80.579	103.722
1.2648	2.66191	4.1414	5.76358	7.40826	9.34054	11.4532	13.5709	16.0264	18.6649	21.8984	24.9679	28.9822	34.1086	40.2764	47.164	55.3137	66.813	80.9001	103.89
1.2648	2.66191	4.15327	5.77252	7.41622	9.35033	11.462	13.5884	16.049	18.6855	21.8988	24.9773	29.067	34.137	40.3061	47.1897	55.3339	66.813	80.9214	103.901
1.26506	2.66191	4.1722	5.79071	7.41963	9.35148	11.4677	13.591	16.079	18.7107	21.9079	25.0012	29.0933	34.1636	40.3147	47.2154	55.3711	66.9529	80.9589	104.539
1.26918	2.66548	4.17635	5.79236	7.42409	9.36274	11.4718	13.5955	16.0848	18.7177	21.9134	25.0107	29.1354	34.1707	40.3403	47.2429	55.3786	66.9887	81.2084	104.584
1.26963	2.66665	4.18359	5.80166	7.43202	9.38167	11.4719	13.6027	16.102	18.7351	21.9602	25.0169	29.2116	34.1884	40.353	47.3179	55.4214	67.0013	81.6794	104.904
1.27176	2.6667	4.18359	5.8039	7.45471	9.39161	11.4773	13.6298	16.1086	18.7565	21.977	25.0236	29.2897	34.2339	40.3714	47.3771	55.5894	67.0025	81.9256	104.933
1.27301	2.67155	4.19083	5.8096	7.46319	9.40296	11.4774	13.6568	16.1106	18.7639	21.9833	25.0303	29.3115	34.278	40.4169	47.4042	55.6681	67.0683	81.9396	104.988
1.27342	2.67383	4.19521	5.81952	7.46398	9.40323	11.4779	13.6574	16.1154	18.8245	21.998	25.0576	29.3334	34.2876	40.4501	47.429	55.6847	67.0938	81.9496	105.262
1.27837	2.67653	4.20902	5.82369	7.49215	9.40323	11.4788	13.7016	16.1224	18.8582	22.0116	25.0638	29.3623	34.3404	40.4686	47.4375	55.7091	67.1367	82.0157	105.283
1.27886	2.68123	4.21952	5.82479	7.50245	9.41299	11.4849	13.7152	16.1243	18.8617	22.0334	25.1312	29.375	34.3879	40.4797	47.4808	55.7857	67.1696	82.122	105.528
1.28005	2.68537	4.22409	5.82642	7.51554	9.42253	11.4993	13.7204	16.1256	18.8824	22.0566	25.1473	29.4337	34.5137	40.6599	47.6318	55.8264	67.1845	82.1378	105.604
1.28268	2.68873	4.22756	5.82874	7.51576	9.42498	11.5078	13.7204	16.172	18.8847	22.0931	25.1985	29.5025	34.5385	40.6797	47.6361	55.8779	67.2015	82.3001	105.898
1.28381	2.69815	4.2346	5.84054	7.51716	9.43667	11.5178	13.7747	16.1787	18.8991	22.106	25.2033	29.5088	34.5593	40.7097	47.6698	56.0797	67.2827	82.39	106.753
1.28462	2.70444	4.23603	5.84712	7.52092	9.46742	11.5601	13.8032	16.2026	18.9252	22.1211	25.2084	29.5569	34.5934	40.8256	47.6741	56.2237	67.4247	82.4194	107.15
1.28638	2.70703	4.24588	5.84958	7.52199	9.48105	11.5647	13.819	16.2075	18.9406	22.1524	25.2484	29.6351	34.6134	40.8315	47.7523	56.349	67.4584	82.4281	107.184
1.28793	2.70703	4.24824	5.87025	7.52991	9.49259	11.5696	13.8316	16.2111	18.9493	22.1607	25.2923	29.6356	34.6643	40.9826	47.7859	56.6256	67.4584	82.5717	107.681
1.28829	2.71024	4.25194	5.87154	7.53304	9.50703	11.5983	13.8582	16.2509	18.9601	22.1631	25.2957	29.6836	34.6768	40.9855	47.8056	56.6522	67.4742	82.6615	108.049
1.28964	2.71478	4.25379	5.87699	7.53836	9.51932	11.6124	13.8885	16.2664	18.9666	22.174	25.3506	29.704	34.6791	41.008	47.8262	56.8033	67.584	82.7625	108.988
1.29063	2.71568	4.2605	5.88895	7.5491	9.55853	11.625	13.9128	16.2668	19.0067	22.1757	25.3524	29.7201	34.789	41.0371	47.9144	56.8137	67.8166	82.7972	109.179
1.29244	2.72365	4.27464	5.89361	7.56281	9.57076	11.6402	13.9212	16.272	19.0141	22.2085	25.3668	29.7304	34.8754	41.2146	48.0018	56.8455	68.06	82.861	109.405
1.29311	2.73192	4.27528	5.89601	7.59748	9.59227	11.6685	13.9428	16.2962	19.0219	22.2358	25.4061	29.7619	34.9493	41.2748	48.049	56.8695	68.2031	82.9347	109.406
1.29425	2.73297	4.28969	5.92382	7.60348	9.59766	11.6733	13.9596	16.3237	19.0234	22.2698	25.4559	29.7832	34.9656	41.3319	48.1217	57.0499	68.2226	83.1207	110.296
1.30077	2.73739	4.29603	5.93108	7.61418	9.60212	11.6766	13.9671	16.3518	19.0358	22.2773	25.4616	29.7976	35.0409	41.3349	48.4518	57.1579	68.2518	83.2936	110.465
1.30109	2.74019	4.30003	5.93198	7.61872	9.61027	11.7003	13.9908	16.353	19.0401	22.2847	25.4771	29.8271	35.0765	41.3387	48.4773	57.2003	68.2816	83.4084	110.542
1.30411	2.75012	4.3006	5.93255	7.63367	9.64835	11.7102	13.9976	16.3734	19.0958	22.2925	25.6056	29.8499	35.1319	41.3532	48.5304	57.2884	68.3764	83.7316	110.855
1.30752	2.75141	4.30168	5.93604	7.64477	9.65114	11.7111	14.0295	16.3999	19.1322	22.3458	25.6304	29.9865	35.1516	41.3738	48.5429	57.3482	68.4322	83.7815	111.699
1.30798	2.75141	4.30488	5.93889	7.64886	9.65132	11.7251	14.0296	16.4081	19.1373	22.3586	25.6524	30.0269	35.1923	41.4038	48.551	57.3589	68.6703	83.9462	111.729
1.30814	2.75141	4.30488	5.94582	7.65212	9.65839	11.7318	14.0629	16.4152	19.16	22.424	25.6699	30.0275	35.2831	41.4169	48.7365	57.3905	68.7835	83.9757	111.756
1.30915	2.75152	4.31165	5.94854	7.66162	9.67383	11.7407	14.0812	16.4158	19.17	22.4362	25.6929	30.0486	35.3195	41.47	48.8389	57.4933	68.8483	83.9959	112.044
1.32401	2.75599	4.31865	5.95221	7.66455	9.6785	11.7528	14.0877	16.4311	19.1857	22.4432	25.786	30.1407	35.3417	41.4703	48.8467	57.6579	68.9081	84.0263	112.243
1.32526	2.77298	4.31879	5.95264	7.66455	9.68384	11.7607	14.0892	16.5048	19.2057	22.4518	25.7871	30.2705	35.4027	41.5802	48.9782	57.7361	68.9805	84.1374	113.546
1.32526	2.77325	4.32097	5.95283	7.68821	9.68654	11.7742	14.1029	16.5207	19.2221	22.4739	25.7909	30.2775	35.5559	41.5852	49.0067	57.7796	69.4878	84.2043	113.79
1.32526	2.77325	4.32117	5.95312	7.69345	9.68654	11.7868	14.1048	16.5302	19.2259	22.4944	25.8505	30.2895	35.6741	41.5906	49.0338	57.7896	69.8256	84.314	115.239
1.32526	2.77325	4.32133	5.9573	7.69345	9.69497	11.8016	14.1123	16.5312	19.2386	22.4971	25.8749	30.3055	35.6783	41.8617	49.1307	57.9168	69.8425	84.4562	115.475
1.32526	2.77757	4.32957	5.96345	7.69345	9.71057	11.8151	14.1556	16.578	19.241	22.5038	25.9033	30.3224	35.7073	41.8707	49.1325	58.0181	69.8559	84.6112	116.453
1.32526	2.78006	4.33024	5.96472	7.70145	9.71101	11.8198	14.1618	16.6064	19.2685	22.525	25.9115	30.344	35.9204	41.8855	49.2068	58.0958	69.8945	84.666	117.174
1.32526	2.78365	4.33195	5.97424	7.71265	9.71838	11.8198	14.1798	16.6207	19.2983	22.5394	25.9378	30.3455	35.971	42.0118	49.2194	58.3396	70.0432	84.9565	118.437
1.32526	2.78423	4.34695	5.98672	7.72538	9.73366	11.8283	14.2006	16.6555	19.3137	22.5517	25.9735	30.3876	35.9771	42.1313	49.2833	58.4038	70.1194	85.1321	118.948
1.32526	2.78423	4.35049	5.99073	7.72538	9.73641	11.8372	14.2204	16.668	19.3703	22.5614	25.9854	30.4737	36.0036	42.1819	49.3367	58.4295	70.2147	85.5819	119.627
1.32526	2.78423	4.35056	5.99256	7.74578	9.73907	11.8494	14.2246	16.677	19.3899	22.5614	26.0127	30.5061	36.0626	42.3224	49.3713	58.4703	70.3264	85.6378	119.97
1.32989	2.78423	4.35495	5.99277	7.75526	9.79108	11.8582	14.2259	16.6791	19.3993	22.5657	26.0371	30.5259	36.113	42.3328	49.4207	58.5191	70.3861	85.6922	120.098
1.33577	2.78423	4.36405	6.00748	7.75949	9.79756	11.8693	14.2447	16.6856	19.4225	22.5702	26.0446	30.5365	36.1341	42.4995	49.4404	58.623	70.4039	85.7201	120.245
1.33577	2.78635	4.36922	6.00916	7.78466	9.80454	11.8804	14.2545	16.7126	19.4356	22.5794	26.0467	30.6046	36.1408	42.5486	49.5254	58.734	70.4663	85.7936	120.503
1.33577	2.78662	4.37904	6.01207	7.79567	9.82842	11.9273	14.2623	16.7344	19.4444	22.6048	26.0877	30.6132	36.2193	42.6765	49.5407	58.934	70.4795	85.8027	120.827
1.33577	2.79644	4.38157	6.02006	7.8203	9.83398	11.9374	14.2756	16.7362	19.4596	22.6267	26.1062	30.6463	36.2768	42.7247	49.5774	59.0235	70.5191	85.9361	120.899
1.33577	2.79763	4.3848	6.02377	7.82098	9.84921	11.9475	14.2933	16.7367	19.6067	22.6454	26.1421	30.659	36.2975	42.7616	49.6366	59.0815	70.5774	85.9463	120.965
1.33577	2.80451	4.3884	6.03524	7.82779	9.85605	11.9732	14.2966	16.738	19.6725	22.6527	26.1606	30.6876	36.332	42.7729	49.6549	59.0988	70.5804	86.1659	121.134
1.33577	2.80471	4.39894	6.04034	7.83122	9.8714	11.9819	14.3021	16.7478	19.7051	22.6771	26.1687	30.7231	36.3353	42.78	49.6744	59.165	70.5895	86.368	121.273
1.33926	2.80473	4.41013	6.04606	7.83216	9.874	11.9937	14.3227	16.7537	19.7075	22.7327	26.2431	30.8011	36.3353	42.8203	49.7115	59.2187	70.6135	86.4055	122.217
1.34835	2.8059	4.41619	6.0543	7.84305	9.8846	11.9982	14.3264	16.7693	19.7259	22.7434	26.2814	30.8176	36.3379	42.9376	49.7603	59.2371	70.9431	86.5456	122.229
1.34916	2.80633	4.41635	6.06725	7.84393	9.88679	12.0007	14.3398	16.8235	19.7545	22.7604	26.3093	30.9541	36.3395	43.0813	49.7724	59.3331	71.0525	86.6323	122.519
1.3557	2.80864	4.41635	6.07002	7.84481	9.89091	12.0125	14.3638	16.8247	19.7673	22.7798	26.34	30.9894	36.3428	43.1078	49.8876	59.46	71.2167	86.7663	122.838
1.35577	2.82635	4.41662	6.07559	7.84743	9.89897	12.0322	14.3795	16.8332	19.7888	22.8032	26.3608	31.0024	36.3826	43.1105	49.9031	59.5777	71.4541	87.0782	123.383
1.3596	2.82762	4.41665	6.07807	7.85228	9.90814	12.0582	14.3849	16.8372	19.8106	22.8041	26.4185	31.0059	36.3853	43.1135	50.0013	59.6567	71.4996	87.1175	123.589
1.3661	2.82817	4.42969	6.07807	7.85884	9.94648	12.0772	14.4108	16.8444	19.8267	22.8124	26.4493	31.0595	36.4692	43.1275	50.0176	59.6593	71.5303	87.355	123.789
1.36817	2.82817	4.43558	6.07807	7.86013	9.94974	12.0826	14.4397	16.8963	19.885	22.8217	26.5563	31.0707	36.5004	43.3523	50.0296	59.8757	71.6171	87.409	123.805
1.36934	2.82924	4.43652	6.08094	7.86346	9.95201	12.0959	14.4419	16.8964	19.9473	22.8688	26.5565	31.0872	36.5109	43.4141	50.0606	59.8879	71.6585	87.4312	123.807
1.36939	2.83256	4.43765	6.08094	7.86836	9.95692	12.1163	14.4767	16.9563	19.9943	22.9137	26.5674	31.2578	36.6209	43.4256	50.1267	59.952	71.6991	87.4464	123.991
1.37146	2.83482	4.45239	6.09299	7.93716	9.96202	12.1255	14.5086	16.9577	19.9961	22.9175	26.6232	31.262	36.6288	43.4422	50.2929	59.9682	71.7084	87.662	124.986
1.37171	2.83684	4.45387	6.0935	7.94137	9.97955	12.1566	14.5223	16.9646	20.0306	22.9204	26.6404	31.2645	36.6754	43.514	50.2959	59.9682	71.8594	87.8744	125.648
1.37223	2.83738	4.45988	6.10691	7.94391	9.98691	12.1723	14.5229	16.9866	20.0321	23.0081	26.6449	31.2768	36.7207	43.5141	50.3001	60.0221	71.8594	88.172	125.927
1.37415	2.84347	4.46431	6.1119	7.95614	9.99263	12.1747	14.5306	16.9876	20.0381	23.0988	26.6521	31.3634	36.7505	43.5219	50.4229	60.0279	71.8632	88.397	126.005
1.37547	2.8845	4.46484	6.11284	7.97231	9.99939	12.1779	14.5529	17.0077	20.0412	23.1119	26.7639	31.3689	36.8097	43.5614	50.475	60.0917	71.88	88.6761	126.281
1.3784	2.88838	4.47172	6.11284	7.97634	10.0025	12.181	14.5696	17.015	20.0719	23.1236	26.7848	31.4638	36.813	43.5871	50.5302	60.3336	71.8935	88.6856	126.283
1.38152	2.89242	4.47237	6.11284	7.98573	10.0061	12.2257	14.5716	17.0306	20.0729	23.127	26.7877	31.4761	36.8613	43.6377	50.7705	60.4588	71.976	88.9965	126.77
1.38156	2.89536	4.47594	6.13836	7.98731	10.0114	12.2444	14.5879	17.0393	20.0849	23.1299	26.8178	31.4824	37.0024	43.639	50.7866	60.6535	72.0183	89.0207	126.905
1.38529	2.89646	4.4857	6.14551	8.00313	10.032	12.2452	14.6379	17.0676	20.1512	23.1655	26.8922	31.4987	37.0897	43.6982	50.8075	60.6834	72.045	89.2998	127.28
1.38772	2.89849	4.49079	6.15726	8.00385	10.0698	12.2541	14.6457	17.0714	20.1757	23.1705	26.9008	31.5154	37.1145	43.8586	51.1349	60.7241	72.0876	89.3537	127.287
1.3891	2.90331	4.49079	6.15846	8.01223	10.0772	12.2603	14.6514	17.0731	20.1917	23.1707	26.9205	31.7184	37.207	43.8607	51.2183	60.7857	72.2449	89.4117	127.644
1.39212	2.90345	4.5044	6.16878	8.01464	10.0878	12.2828	14.6546	17.08	20.2139	23.2136	26.9238	31.7355	37.2194	43.8641	51.2592	60.8369	72.4235	89.4472	127.907
1.39212	2.9097	4.50676	6.17354	8.01601	10.0971	12.293	14.6684	17.1044	20.2934	23.2391	26.9694	31.7729	37.2448	43.9351	51.2661	60.9243	72.6043	89.5088	127.922
1.39212	2.91086	4.50778	6.17551	8.03488	10.1087	12.2977	14.6695	17.1284	20.299	23.2445	26.992	31.792	37.2741	43.9792	51.3033	60.9404	72.6127	89.5247	127.997
1.39212	2.91553	4.52264	6.18156	8.03999	10.1168	12.2989	14.6709	17.1367	20.299	23.2468	27.0143	31.8457	37.2772	44.0185	51.4483	60.9662	72.8587	89.5325	128.129
1.39248	2.92199	4.52438	6.18793	8.05698	10.1184	12.3054	14.6834	17.1379	20.3398	23.2777	27.03	31.8983	37.2775	44.0315	51.4713	60.9995	72.9924	89.5501	129.423
1.39305	2.92269	4.52438	6.19648	8.06121	10.1372	12.3155	14.6903	17.1483	20.3398	23.2886	27.0535	31.9186	37.356	44.0352	51.4713	61.111	73.0493	89.6636	129.871
1.39323	2.92273	4.52643	6.19971	8.06424	10.1646	12.3268	14.7437	17.1516	20.3459	23.3217	27.0655	31.9506	37.3799	44.0515	51.4736	61.1705	73.0779	90.2236	129.941
1.3936	2.9263	4.52643	6.20613	8.06666	10.1678	12.3384	14.7841	17.1549	20.3595	23.3247	27.1117	32.0001	37.482	44.0535	51.4756	61.4372	73.1684	90.3536	130.615
1.39497	2.93705	4.52643	6.2106	8.08045	10.1971	12.3472	14.7999	17.1615	20.3731	23.3575	27.2007	32.0017	37.5194	44.0625	51.4954	61.4741	73.3578	90.4022	130.79
1.39649	2.93921	4.52776	6.21954	8.08614	10.2092	12.3831	14.8147	17.1689	20.3872	23.3722	27.2844	32.0476	37.5815	44.125	51.5348	61.4944	73.5528	90.4802	131.168
1.39854	2.94357	4.52988	6.22098	8.09975	10.2182	12.4391	14.8168	17.187	20.3942	23.3972	27.2891	32.0489	37.6381	44.1558	51.5471	61.72	74.1073	90.4946	131.26
1.40317	2.95312	4.53774	6.22206	8.10984	10.2492	12.442	14.8393	17.1907	20.3961	23.493	27.3618	32.0601	37.6531	44.2216	51.5741	61.7465	74.1237	90.7352	131.61
1.40317	2.95616	4.53774	6.23711	8.11736	10.2761	12.4446	14.84	17.1914	20.408	23.497	27.3784	32.0876	37.7287	44.2364	51.615	61.7975	74.2445	90.8459	131.743
1.40446	2.96018	4.54953	6.24163	8.12519	10.2772	12.4539	14.8678	17.2072	20.4132	23.5042	27.3943	32.1157	37.7447	44.2577	51.6287	62.0332	74.2738	91.0617	132.043
1.4054	2.96318	4.54979	6.24218	8.12519	10.2801	12.4612	14.887	17.2353	20.4184	23.5299	27.4061	32.1438	37.7698	44.2835	51.7008	62.1059	74.3391	91.083	132.081
1.40572	2.96336	4.5509	6.24566	8.13421	10.2939	12.4612	14.8983	17.2515	20.4434	23.6318	27.4149	32.1518	37.771	44.3038	51.7856	62.1191	74.3391	91.3206	132.235
1.40588	2.96336	4.56029	6.24712	8.13455	10.323	12.4913	14.8984	17.2741	20.4735	23.6721	27.4221	32.3165	37.8096	44.3167	51.8768	62.2209	74.3913	91.6446	132.336
1.41388	2.96454	4.56029	6.25106	8.14982	10.374	12.5095	14.9007	17.2761	20.485	23.6877	27.4657	32.3496	37.8273	44.3406	51.8896	62.2624	74.5416	91.7111	132.653
1.41396	2.96908	4.56029	6.26782	8.15156	10.3751	12.5181	14.9047	17.3592	20.4894	23.7455	27.5536	32.3985	37.899	44.3857	51.8931	62.5524	74.5679	91.9314	132.689
1.41544	2.97356	4.56279	6.26851	8.18252	10.3856	12.5265	14.938	17.3633	20.5108	23.7736	27.5822	32.5337	37.9756	44.4674	51.987	62.6311	74.8841	92.0443	133.662
1.41701	2.97356	4.56589	6.27418	8.19137	10.3886	12.5524	14.9457	17.3684	20.5204	23.791	27.6334	32.537	37.9783	44.7492	52.0425	62.6573	74.9434	92.1988	134.339
1.41746	2.97356	4.56769	6.27418	8.19163	10.3915	12.5748	14.9814	17.4227	20.522	23.8079	27.6875	32.5566	38.0447	44.7678	52.094	62.7014	74.9536	92.2865	134.505
1.41965	2.97356	4.57211	6.27514	8.19769	10.4123	12.5796	14.9829	17.4641	20.54	23.8551	27.705	32.5859	38.093	44.8222	52.2606	62.7476	75.0856	92.2966	134.843
1.42611	2.97656	4.57376	6.29944	8.22828	10.4209	12.5818	14.9831	17.515	20.6393	23.8835	27.7085	32.6415	38.1259	44.8438	52.3415	62.7664	75.1105	92.3301	135.297
1.42762	2.97656	4.57378	6.30308	8.23355	10.425	12.5825	14.985	17.5211	20.6731	23.9203	27.7377	32.6897	38.1331	44.8472	52.4477	62.7956	75.2258	92.335	136.815
1.43094	2.97656	4.59197	6.31787	8.24181	10.4298	12.6341	14.9875	17.5557	20.6748	23.9471	27.8071	32.7574	38.2674	44.9024	52.6301	62.8195	75.2584	93.0967	136.853
1.43496	2.98558	4.59741	6.32398	8.24546	10.4409	12.6366	14.9981	17.566	20.6784	23.9484	27.8086	32.8023	38.4773	44.9079	52.6346	62.8195	75.4124	93.2306	136.982
1.43496	2.98688	4.59795	6.32398	8.24546	10.4426	12.6466	15.0031	17.5832	20.6926	23.9529	27.8123	32.8192	38.4793	45.0006	52.8084	62.8932	75.4487	93.6518	137.427
1.43496	2.98688	4.61696	6.32648	8.24546	10.4445	12.6541	15.026	17.6125	20.7216	23.9734	27.8183	32.8286	38.5622	45.1095	52.85	63.0517	75.5376	94.4853	137.764
1.43522	2.98934	4.62368	6.33741	8.24546	10.4467	12.6852	15.0359	17.6279	20.7216	24.072	27.8304	32.8557	38.6438	45.1098	52.8575	63.0812	75.6293	94.5439	138.543
1.43659	2.99386	4.63903	6.35581	8.25806	10.4785	12.7274	15.0494	17.6555	20.7443	24.0906	27.831	32.9342	38.7189	45.1452	52.8782	63.1138	75.6325	95.0546	138.747
1.43769	2.99386	4.63989	6.39256	8.26307	10.4929	12.7436	15.0894	17.662	20.7475	24.0953	27.8478	32.9422	38.8794	45.1674	52.9668	63.1483	75.6805	95.1263	139.079
1.44052	2.99386	4.6429	6.40084	8.26666	10.4929	12.7447	15.0932	17.6811	20.7692	24.1315	27.88	32.9913	38.882	45.1813	53.0252	63.369	75.8009	95.1521	142.027
1.44304	2.99703	4.64329	6.40088	8.2697	10.5055	12.7473	15.13	17.6925	20.8091	24.1371	27.9095	33.0509	38.8898	45.1942	53.212	63.406	75.8735	95.2463	146.451
1.4441	3.00029	4.64623	6.4074	8.2786	10.512	12.7563	15.151	17.7158	20.8234	24.1395	27.9563	33.0628	38.949	45.2873	53.3042	63.4623	75.9703	95.2723	147.894
1.44503	3.0035	4.67143	6.41535	8.28401	10.5157	12.7637	15.1546	17.7284	20.8359	24.1448	27.9879	33.1091	38.9824	45.3307	53.3303	63.5074	75.9794	95.3514	150.045
1.44635	3.00396	4.67514	6.41734	8.29505	10.5305	12.769	15.1635	17.7461	20.8817	24.1713	28.0688	33.1652	39.0144	45.3621	53.4321	63.845	76.0366	95.6659	151.44
1.44635	3.00396	4.67653	6.41734	8.33719	10.5357	12.7823	15.1642	17.7505	20.8833	24.2037	28.1075	33.2309	39.0297	45.3935	53.4929	63.892	76.1007	95.8771	153.379
1.44635	3.01269	4.67809	6.41876	8.36685	10.549	12.818	15.1742	17.9116	20.8948	24.2196	28.1181	33.3173	39.0699	45.5433	53.4947	63.9603	76.1629	95.9516	153.982
1.44635	3.01307	4.6807	6.42162	8.37074	10.55	12.8221	15.1942	17.9177	20.918	24.2572	28.1195	33.3596	39.0863	45.5812	53.6473	63.9704	76.4049	96.0573	156.002
1.44819	3.0151	4.69355	6.43965	8.37943	10.5529	12.8276	15.2052	17.9243	20.9397	24.2973	28.1338	33.3943	39.1792	45.5825	53.6513	64.0411	76.4912	96.2302	156.835
1.45215	3.01745	4.69408	6.44089	8.38773	10.5539	12.8516	15.2219	17.9296	20.9541	24.3123	28.2003	33.5106	39.1972	45.623	53.7837	64.172	76.6834	96.4518	158.54
1.45862	3.01762	4.70161	6.44942	8.39048	10.5554	12.8713	15.2373	17.9453	20.9591	24.3442	28.2075	33.5456	39.2163	45.7311	53.8781	64.2877	76.7592	96.48	158.634
1.45948	3.02698	4.70161	6.45255	8.39743	10.5591	12.8793	15.2416	17.9508	20.9758	24.3667	28.3198	33.5564	39.3544	45.7549	54.0763	64.328	76.9235	96.7227	159.268
1.45996	3.02725	4.70161	6.46827	8.41132	10.5827	12.8818	15.2539	17.9641	21.0411	24.3737	28.398	33.5648	39.3791	45.7972	54.1758	64.387	76.9863	97.0398	159.3
1.46789	3.03865	4.70161	6.4743	8.41899	10.6007	12.8841	15.2657	17.98	21.053	24.4147	28.4608	33.5717	39.4242	45.8058	54.3585	64.4105	76.9975	97.349
1.46844	3.03886	4.705	6.49444	8.42699	10.6163	12.8939	15.2693	18.009	21.084	24.4298	28.4866	33.6023	39.5193	46.036	54.3594	64.438	77.2797	97.5901
1.47099	3.04392	4.70836	6.49599	8.44817	10.6249	12.9188	15.2826	18.0108	21.0952	24.4562	28.501	33.6108	39.6018	46.0925	54.3655	64.5613	77.3134	97.5904
1.47609	3.04401	4.71784	6.51094	8.45614	10.6542	12.9334	15.2994	18.0803	21.1039	24.4811	28.515	33.6193	39.6021	46.118	54.5118	64.6459	77.4851	98.3072
1.47656	3.04683	4.71797	6.51794	8.52884	10.664	12.9474	15.3022	18.087	21.1167	24.4835	28.5564	33.7799	39.6555	46.1772	54.6328	64.6808	77.623	98.411
1.47656	3.05098	4.71842	6.51833	8.54268	10.6654	12.9771	15.3063	18.1009	21.1364	24.4873	28.5638	33.8609	39.67	46.2113	54.7121	64.7071	77.8013	98.5863
1.47889	3.05612	4.71979	6.5384	8.56037	10.676	12.9831	15.3155	18.1109	21.1525	24.5035	28.691	33.9562	39.6814	46.227	54.7131	64.7147	77.9228	98.7084
1.47902	3.05853	4.72118	6.53887	8.57693	10.697	13.0034	15.3235	18.1276	21.1655	24.538	28.7816	33.9592	39.6972	46.2322	54.748	64.8006	78.0749	98.7339
1.48088	3.06687	4.72542	6.54147	8.6292	10.7092	13.026	15.336	18.1482	21.1772	24.5517	28.7838	33.9734	39.871	46.3186	54.9803	64.8812	78.235	98.8136
1.48724	3.06817	4.72682	6.54641	8.63186	10.7176	13.0266	15.3521	18.1634	21.1844	24.5834	28.8191	33.993	39.8793	46.3785	55.0062	64.8913	78.2888	98.8492
1.48828	3.06817	4.72731	6.54918	8.64486	10.7374	13.0314	15.4072	18.1668	21.1967	24.6467	28.8631	34.0402	39.9531	46.47	55.0133	64.9356	78.4499	98.8994
1.48828	3.06817	4.73019	6.55076	8.65669	10.7693	13.0346	15.4202	18.2293	21.233	24.6512	28.8881	34.0537	40.0045	46.485	55.0997	64.9468	78.4715	98.9438
1.48828	3.06817	4.74475	6.55275	8.66935	10.7811	13.043	15.4324	18.2342	21.2424	24.6536	28.8948	34.1091	40.0215	46.5319	55.1626	64.9706	78.653	99.0777
1.48828	3.07134	4.75286	6.56553	8.66939	10.7861	13.0453	15.4529	18.2411	21.2853	24.6647	28.9618	34.129	40.0371	46.554	55.1805	65.0656	78.7583	99.122
1.49104	3.07753	4.75366	6.56739	8.68164	10.8018	13.0523	15.4706	18.2428	21.2853	24.6696	28.9643	34.1408	40.0801	46.6202	55.2255	65.1847	78.838	99.2036
1.49344	3.08104	4.75688	6.57066	8.68516	10.8056	13.0523	15.4706	18.2542	21.2967	24.6881	28.9889	34.2048	40.1353	46.6288	55.2616	65.2474	78.8523	99.2978
1.49647	3.08355	4.76294	6.59077	8.69022	10.8533	13.0777	15.4866	18.2542	21.297	24.6901	29.0448	34.2389	40.2071	46.6391	55.277	65.4503	79.0184	99.4575
1.49693	3.08355	4.7645	6.59599	8.69138	10.8644	13.0801	15.4964	18.2745	21.3691	24.6956	29.0842	34.2404	40.3549	46.6956	55.3864	65.5275	79.1312	100.292
1.49693	3.08559	4.7666	6.60785	8.70459	10.8765	13.0824	15.4986	18.279	21.4428	24.6987	29.1273	34.251	40.3601	46.738	55.5016	65.8102	79.2361	100.689
1.49693	3.08604	4.77492	6.62628	8.70676	10.881	13.1249	15.5206	18.3253	21.4829	24.7078	29.1888	34.2996	40.4074	46.8051	55.5851	66.0563	79.2964	101.317
1.49693	3.08606	4.77828	6.62628	8.70769	10.895	13.1323	15.5221	18.3253	21.5132	24.719	29.1991	34.314	40.471	47.0006	55.6286	66.1255	79.3344	101.622
1.49693	3.0899	4.77828	6.62628	8.72853	10.8978	13.1406	15.5309	18.3257	21.5469	24.7272	29.2223	34.321	40.4748	47.0992	55.7048	66.1498	79.4872	102.286
1.49858	3.09868	4.77828	6.62683	8.73602	10.911	13.1465	15.5447	18.3266	21.5576	24.7777	29.2578	34.3414	40.6017	47.1223	55.7933	66.2216	79.5566	102.633
1.50078	3.10538	4.77829	6.63734	8.77679	10.9162	13.1488	15.5753	18.3415	21.5702	24.7982	29.2772	34.3801	40.6062	47.1386	55.9531	66.2765	79.6086	102.723
1.50091	3.11171	4.78857	6.63847	8.78386	10.9169	13.1498	15.5777	18.3907	21.5921	24.81	29.2863	34.403	40.622	47.2122	56.017	66.3084	79.808	102.728
1.50164	3.11287	4.79058	6.64909	8.79419	10.9209	13.1539	15.5788	18.4299	21.5987	24.8445	29.342	34.4261	40.6343	47.2371	56.0655	66.3819	79.9138	103.188
1.50667	3.11287	4.79654	6.66543	8.7978	10.9276	13.1631	15.5906	18.4374	21.6337	24.9078	29.3546	34.4549	40.6579	47.2513	56.1118	66.4048	79.959	103.343
1.50686	3.11475	4.79816	6.67426	8.81139	10.934	13.1795	15.6191	18.4751	21.6515	24.912	29.3805	34.5272	40.6898	47.2539	56.3216	66.407	80.0304	103.736
1.50777	3.11736	4.79855	6.71191	8.82154	10.9394	13.2002	15.6191	18.498	21.6664	24.9224	29.4613	34.5376	40.8516	47.3371	56.3469	66.4292	80.0637	104.154
1.50803	3.11978	4.80115	6.71561	8.8217	10.9442	13.2095	15.6622	18.5242	21.6777	24.9304	29.4758	34.6027	40.899	47.3923	56.4843	66.6614	80.0985	104.345
1.50881	3.1268	4.80249	6.72991	8.84885	10.9519	13.2457	15.6848	18.5507	21.7027	24.9576	29.4904	34.6164	40.9093	47.4374	56.4988	66.7241	80.2801	104.511
1.50881	3.12692	4.81701	6.73379	8.84958	10.9738	13.2928	15.6931	18.6008	21.7214	25.1171	29.6288	34.8297	41.0446	47.598	56.5293	66.7282	80.3401	104.895
1.50881	3.12949	4.81784	6.7575	8.86399	11.0052	13.342	15.696	18.615	21.7448	25.1462	29.6346	34.89	41.0689	47.6438	56.5978	66.8492	80.4618	104.912
1.50881	3.13226	4.82059	6.76498	8.8724	11.0056	13.3485	15.7019	18.618	21.7493	25.1813	29.6561	34.9266	41.1683	47.6647	56.7134	66.9786	80.5689	105.062
1.50881	3.13573	4.83379	6.76893	8.87291	11.0074	13.3811	15.7057	18.6526	21.7692	25.1996	29.6826	34.9323	41.2555	47.8267	56.8578	67.0205	80.7571	105.201
1.51273	3.13757	4.83936	6.77093	8.87304	11.0145	13.389	15.7147	18.6918	21.873	25.2895	29.7195	34.9544	41.2652	47.8676	56.8695	67.0722	80.8342	105.492
1.51488	3.13757	4.84097	6.77711	8.87304	11.0513	13.4015	15.7269	18.7823	21.8736	25.3238	29.7517	34.9644	41.272	47.9378	56.9243	67.1998	80.9808	105.592
1.5169	3.13757	4.84299	6.7888	8.88127	11.0526	13.4151	15.735	18.7971	21.8817	25.3871	29.7518	35.0154	41.2985	47.9403	56.9831	67.2444	81.2762	105.913
1.51786	3.13867	4.84725	6.7974	8.88192	11.0527	13.4266	15.7524	18.8023	21.8844	25.3882	29.8047	35.0842	41.3115	47.9858	57.0375	67.3169	81.4706	106.02
1.5198	3.14051	4.84748	6.7985	8.88531	11.0667	13.4273	15.7623	18.8185	21.9004	25.4028	29.8596	35.1323	41.3122	48.0342	57.1022	67.3761	81.5443	106.136
1.52023	3.14919	4.84748	6.80171	8.89124	11.077	13.4341	15.7673	18.8191	21.9079	25.4061	29.9032	35.1826	41.3503	48.0948	57.4037	67.3798	81.6327	106.743
1.52125	3.15153	4.85181	6.80662	8.89292	11.0776	13.4497	15.776	18.83	21.9079	25.4573	29.9425	35.1923	41.4199	48.1335	57.4267	67.3821	81.7876	106.873
1.52135	3.15436	4.86001	6.80662	8.90229	11.0802	13.4504	15.7948	18.8532	21.9809	25.5308	30.06	35.2224	41.4243	48.1401	57.4291	67.4216	81.8757	107.2
1.52301	3.16135	4.86313	6.81478	8.90761	11.0829	13.4526	15.798	18.8788	21.9864	25.6057	30.0617	35.2273	41.4697	48.366	57.4788	67.5189	82.0294	107.732
1.527	3.16306	4.86926	6.82467	8.91319	11.0852	13.472	15.8248	18.9282	21.9882	25.6241	30.0796	35.2868	41.5425	48.4047	57.5007	67.5324	82.0969	109.091
1.52976	3.17012	4.86939	6.82516	8.91964	11.0853	13.4779	15.8267	18.9298	22.04	25.628	30.1257	35.3084	41.5576	48.54	57.508	67.6472	82.2086	109.7
1.53464	3.17371	4.87189	6.83769	8.93292	11.0898	13.4917	15.8634	18.9627	22.0961	25.6375	30.1392	35.3482	41.5578	48.5429	57.6763	67.8043	82.2134	109.702
1.53507	3.19105	4.87335	6.85538	8.93313	11.1147	13.5055	15.8668	18.9631	22.1019	25.7342	30.1538	35.4143	41.5811	48.5683	57.6884	67.8648	82.2215	110.341
1.53527	3.19211	4.88482	6.85852	8.94346	11.124	13.5185	15.8827	18.9719	22.1263	25.7553	30.1614	35.4255	41.6015	48.5859	57.7304	67.9183	82.3041	110.694
1.54063	3.19922	4.90044	6.86175	8.94514	11.1288	13.5231	15.8924	19.0027	22.143	25.7836	30.2855	35.4581	41.616	48.5946	57.7843	67.9209	82.4341	110.881
1.54242	3.19922	4.90338	6.86875	8.95795	11.1483	13.5303	15.9069	19.0178	22.1555	25.7838	30.2902	35.4785	41.6386	48.6301	57.8216	67.9223	82.4634	111.784
1.54913	3.20405	4.90338	6.88125	8.96407	11.1746	13.5554	15.9273	19.0274	22.1661	25.8076	30.2988	35.5135	41.6779	48.6451	57.8776	68.1498	82.4954	112.012
1.54927	3.20815	4.91345	6.88506	8.96643	11.1998	13.5686	15.9466	19.0322	22.1717	25.8101	30.3817	35.5629	41.68	48.6905	57.9521	68.1551	82.5035	112.899
1.54979	3.20867	4.92188	6.88612	8.98806	11.202	13.5709	16.0312	19.0512	22.1826	25.8504	30.3878	35.5964	41.6812	48.7353	57.9967	68.1946	82.7181	112.958
1.55032	3.20867	4.9423	6.88654	8.9897	11.2061	13.5859	16.061	19.0655	22.2003	25.8598	30.3955	35.6139	41.7911	48.7645	58.1515	68.2816	82.8046	113.488
1.55207	3.20867	4.9423	6.89062	8.99047	11.2072	13.6016	16.0698	19.1053	22.2099	25.8691	30.4381	35.6301	41.8598	48.8079	58.1698	68.2891	82.8061	113.844
1.55281	3.21483	4.9423	6.89986	8.99581	11.2074	13.6054	16.0698	19.1131	22.219	25.9202	30.4627	35.6556	41.9408	48.9999	58.1906	68.3188	82.84	114.406
1.55472	3.21841	4.94333	6.90053	9.02104	11.2137	13.6122	16.074	19.121	22.2408	25.9647	30.485	35.6993	41.9943	49.0401	58.2208	68.3755	82.8883	114.604
1.5563	3.222	4.94611	6.90979	9.02203	11.2236	13.6244	16.1516	19.1237	22.318	25.996	30.4928	35.9263	42.0271	49.0616	58.3388	68.5612	83.1351	114.813
1.55643	3.22461	4.94642	6.91869	9.03536	11.2344	13.6501	16.1629	19.1463	22.3191	26.0622	30.5014	35.9631	42.0289	49.1707	58.3772	68.5759	83.1801	114.813
1.55643	3.22461	4.94642	6.93006	9.04657	11.239	13.651	16.1674	19.1515	22.3412	26.065	30.5066	35.9649	42.0346	49.1775	58.3948	68.609	83.2412	114.97
1.5593	3.22879	4.94879	6.94653	9.04876	11.2452	13.653	16.1904	19.1607	22.3833	26.0883	30.5178	35.9702	42.1286	49.1871	58.4031	68.9067	83.3008	115.218
1.56093	3.22994	4.97408	6.94752	9.05562	11.2472	13.6575	16.1936	19.1623	22.3836	26.1048	30.5582	36.0107	42.1539	49.214	58.4404	68.9067	83.3019	115.394
1.56139	3.23686	4.97483	6.94974	9.06327	11.2597	13.6725	16.3001	19.1846	22.3837	26.1085	30.5934	36.0334	42.1999	49.2186	58.4451	68.9612	83.3702	115.913
1.56596	3.23686	4.97953	6.96058	9.06813	11.264	13.6757	16.3098	19.2552	22.4015	26.1116	30.6117	36.0382	42.2897	49.3367	58.4855	69.1344	83.3837	116.26
1.56687	3.23686	4.98302	6.96301	9.0955	11.2694	13.6809	16.3184	19.2983	22.4121	26.2329	30.6791	36.0718	42.3708	49.3686	58.622	69.305	83.4145	116.412
1.56879	3.23686	4.99463	6.97549	9.09772	11.2935	13.6849	16.3203	19.3243	22.4301	26.2334	30.7617	36.1825	42.4146	49.3883	58.6635	69.4054	83.4621	117.141
1.56879	3.2489	5.0144	6.99963	9.13944	11.3104	13.6905	16.3222	19.3305	22.4472	26.2353	30.8011	36.2594	42.4592	49.4306	58.6974	69.5459	83.9324	117.335
1.56879	3.25463	5.01441	7.0002	9.14503	11.3204	13.7186	16.3235	19.365	22.4607	26.3044	30.8405	36.3159	42.4831	49.433	58.734	69.5536	83.954	117.418
1.56879	3.26234	5.01951	7.04338	9.1612	11.323	13.7353	16.3333	19.379	22.4607	26.3175	30.8906	36.3175	42.5625	49.433	58.804	69.6484	83.963	117.422
1.56879	3.26255	5.01972	7.04705	9.1631	11.3364	13.7571	16.3465	19.3906	22.4852	26.322	30.9071	36.3355	42.6169	49.5334	58.9111	69.65	84.2263	117.774
1.56879	3.2735	5.02069	7.04705	9.1636	11.3558	13.7964	16.3611	19.405	22.4891	26.3424	30.9281	36.3894	42.6354	49.5405	59.0091	69.7294	84.2852	118.139
1.56879	3.28137	5.02257	7.05082	9.18823	11.4366	13.8164	16.3628	19.4102	22.5184	26.4365	30.9824	36.4218	42.7113	49.8332	59.022	69.8924	84.3639	118.153
1.56879	3.2833	5.02794	7.0846	9.18912	11.4453	13.8164	16.3918	19.4368	22.5231	26.4409	31.1053	36.4422	42.8359	49.9426	59.0471	70.245	84.413	118.312
1.57577	3.28743	5.04942	7.08562	9.19482	11.4555	13.8176	16.4193	19.4554	22.5387	26.453	31.1064	36.4792	42.8917	50.121	59.0572	70.2774	84.607	118.409
1.57577	3.29042	5.05781	7.12424	9.21456	11.4672	13.8263	16.5226	19.4564	22.5884	26.5234	31.2204	36.5124	42.8939	50.1404	59.2672	70.4039	84.8767	119.093
1.57577	3.30169	5.05918	7.14185	9.22964	11.4718	13.8323	16.5543	19.4627	22.6254	26.5382	31.2694	36.5513	42.922	50.1404	59.2688	70.4142	84.9031	119.157
1.57577	3.30528	5.05918	7.14185	9.25064	11.4902	13.8465	16.5981	19.4663	22.6301	26.5891	31.3168	36.5845	42.9988	50.2472	59.4942	70.7694	84.9052	120.021
1.57577	3.30721	5.06326	7.14306	9.28574	11.4931	13.8557	16.6112	19.4912	22.6715	26.5896	31.3188	36.6548	43.001	50.317	59.5552	70.8184	84.9502	120.072
1.57577	3.30936	5.06327	7.15367	9.29762	11.5005	13.871	16.62	19.5176	22.7434	26.5989	31.3662	36.7059	43.0757	50.3791	59.6603	70.9886	84.9565	120.265
1.57577	3.30936	5.06738	7.15367	9.30286	11.5116	13.8773	16.6609	19.547	22.7756	26.6478	31.3709	36.8073	43.1023	50.4057	59.6845	71.1228	85.0933	120.364
1.57577	3.31085	5.06738	7.15367	9.30698	11.5323	13.8885	16.662	19.5919	22.7889	26.6514	31.3963	36.8619	43.2068	50.4529	59.6887	71.1483	85.24	120.547
1.57577	3.31619	5.07335	7.15367	9.32254	11.5335	13.9016	16.6679	19.6058	22.8006	26.6906	31.4568	36.9277	43.2086	50.578	59.7608	71.1824	85.4268	120.598
1.57577	3.31755	5.07335	7.16124	9.32406	11.5401	13.9062	16.6992	19.629	22.8366	26.7068	31.4769	36.9542	43.3865	50.5851	59.816	71.1899	85.5702	120.755
1.57691	3.3232	5.07335	7.1644	9.32406	11.5495	13.9105	16.7126	19.6413	22.9478	26.7439	31.501	37.0165	43.4556	50.617	59.9016	71.6161	85.6495	121.754
1.58134	3.3279	5.07466	7.16636	9.33699	11.5525	13.9152	16.7723	19.6875	22.9607	26.7473	31.6002	37.0189	43.5593	50.6551	60.0684	71.6563	85.682	121.832
1.5823	3.32822	5.10279	7.1748	9.3548	11.5529	13.9271	16.794	19.6881	22.9726	26.7935	31.6133	37.068	43.5767	50.7371	60.077	71.6644	85.7099	121.931
1.58827	3.33713	5.10403	7.17976	9.37097	11.5559	13.9299	16.839	19.7013	23.0081	26.8253	31.6173	37.1014	43.5913	50.7532	60.1972	71.7016	85.7682	122.217
1.58827	3.33927	5.11362	7.18745	9.37097	11.5569	13.932	16.8483	19.7152	23.0985	26.9075	31.6298	37.1041	43.5925	50.8099	60.3537	71.7556	85.8723	122.385
1.58893	3.33999	5.11628	7.18934	9.37277	11.569	13.932	16.8526	19.7649	23.1175	26.9229	31.6803	37.1805	43.678	50.8353	60.3859	71.7784	85.9132	122.574
1.58925	3.34155	5.12101	7.18966	9.37431	11.569	13.9332	16.8618	19.7821	23.1449	26.9642	31.6812	37.2115	43.7244	50.8605	60.4409	71.9823	86.0276	122.629
1.58966	3.34266	5.15635	7.19336	9.38066	11.569	13.9373	16.8672	19.7888	23.1603	26.9728	31.7029	37.2944	43.7383	50.8962	60.4535	72.0567	86.2052	123.043
1.58969	3.34488	5.15902	7.19763	9.38066	11.5727	13.9386	16.869	19.8222	23.1756	26.9982	31.7107	37.3112	43.7471	50.9485	60.5044	72.1596	86.8798	123.156
1.59159	3.34724	5.15967	7.20069	9.38066	11.5847	13.9407	16.8776	19.8519	23.194	27.03	31.7194	37.3366	43.7756	50.9889	60.658	72.2242	87.0188	123.274
1.59255	3.34724	5.17382	7.21546	9.38078	11.5978	13.9603	16.8789	19.8561	23.2374	27.0401	31.7297	37.3431	43.8075	51.0133	60.7194	72.2531	87.1217	123.589
1.59591	3.34749	5.18769	7.22038	9.38981	11.6214	13.9701	16.8803	19.8763	23.2457	27.0627	31.9332	37.356	43.8296	51.1123	60.7792	72.3081	87.13	123.726
1.59658	3.35301	5.20898	7.23175	9.38981	11.6238	13.9928	16.8803	19.8825	23.2578	27.0665	31.9334	37.3872	43.884	51.2029	60.8155	72.3701	87.1447	123.856
1.59991	3.35339	5.21465	7.23744	9.40041	11.6314	14.0295	16.896	19.8913	23.2594	27.0739	31.9365	37.4287	43.9196	51.2407	60.8955	72.4457	87.517	124.254
1.60505	3.35972	5.21489	7.24017	9.40323	11.6591	14.0618	16.9304	19.9131	23.3066	27.0815	31.9856	37.6428	43.9572	51.3075	60.9519	72.4824	88.5842	124.57
1.60727	3.36155	5.21489	7.24202	9.41861	11.6763	14.0708	16.9315	19.9536	23.3217	27.1132	32.013	37.6648	43.9909	51.3187	60.9901	72.5025	88.8003	124.722
1.61043	3.36228	5.21899	7.25052	9.42904	11.6829	14.0715	16.9346	19.9936	23.3275	27.1775	32.0598	37.6836	44.0473	51.4654	61.0015	72.7643	88.9444	124.734
1.61068	3.36239	5.2255	7.25512	9.42904	11.6992	14.0835	16.9392	19.9998	23.3639	27.2075	32.0659	37.7339	44.1394	51.4942	61.0447	72.818	88.9475	125.024
1.61089	3.36354	5.22791	7.25906	9.43217	11.7019	14.0854	16.9458	20.0054	23.3721	27.312	32.1141	37.8239	44.2401	51.5377	61.0604	72.8316	89.412	125.027
1.6119	3.3738	5.23202	7.26314	9.43883	11.7088	14.0948	16.9562	20.0185	23.3943	27.3253	32.1534	37.851	44.2577	51.6316	61.063	72.894	89.4269	125.316
1.61195	3.38522	5.23552	7.27403	9.44534	11.7196	14.102	16.9662	20.0243	23.3952	27.5328	32.23	37.9344	44.2757	51.6926	61.1071	72.9217	89.6542	125.676
1.61453	3.38767	5.2513	7.27554	9.44534	11.7237	14.1191	16.9864	20.0351	23.4222	27.5879	32.2728	38.0443	44.2996	51.752	61.115	72.9296	90.0394	125.709
1.61611	3.39318	5.25713	7.29012	9.44621	11.7778	14.1261	16.9872	20.0427	23.4349	27.5897	32.3321	38.069	44.3201	51.7581	61.3208	72.9887	90.0992	126.227
1.61903	3.39635	5.26187	7.29402	9.44814	11.7899	14.1442	17	20.0548	23.481	27.6897	32.545	38.0969	44.3857	51.8462	61.4633	73.1424	90.2531	126.971
1.6199	3.39833	5.26664	7.31689	9.45511	11.7945	14.1725	17.0018	20.0979	23.4935	27.7391	32.5886	38.1406	44.5151	51.8931	61.487	73.2421	90.3285	127.488
1.62102	3.40155	5.26664	7.32066	9.46742	11.7983	14.1738	17.0668	20.1138	23.507	27.7407	32.6113	38.1477	44.5542	51.9141	61.4886	73.4562	90.6537	127.872
1.62122	3.40347	5.2676	7.32734	9.47327	11.8034	14.179	17.128	20.181	23.5174	27.7606	32.6381	38.1573	44.5817	52.2226	61.5239	73.58	90.7369	128.022
1.62138	3.40396	5.27552	7.33345	9.49091	11.8079	14.199	17.1702	20.259	23.5542	27.7835	32.6897	38.3227	44.6577	52.311	61.5494	73.6548	90.9848	128.056
1.62681	3.40448	5.27724	7.34168	9.49803	11.8087	14.206	17.2156	20.2725	23.5559	27.8097	32.7221	38.3267	44.7681	52.3112	61.7283	73.6697	91.044	129.193
1.62996	3.4077	5.28205	7.34571	9.50436	11.8112	14.2153	17.2242	20.2839	23.5677	27.8124	32.9219	38.3906	44.7785	52.6261	61.77	73.714	91.1534	129.71
1.63256	3.40938	5.28386	7.34673	9.53769	11.8151	14.2168	17.2265	20.3009	23.6486	27.8129	32.9443	38.4752	44.7897	52.6351	61.7833	73.7173	91.5591	129.972
1.6331	3.41153	5.28855	7.35872	9.55404	11.8155	14.2475	17.2352	20.3154	23.6685	27.8211	32.9848	38.4899	44.8093	52.7175	61.8797	73.7465	91.7058	130.185
1.63576	3.41886	5.30035	7.36071	9.55534	11.8227	14.2565	17.2353	20.3154	23.6943	27.8304	32.9968	38.6004	44.8276	52.9245	62.0117	73.7518	91.7521	130.291
1.63595	3.42247	5.30102	7.37462	9.57555	11.8227	14.2626	17.2424	20.3192	23.7122	27.8439	33.1053	38.6179	44.8389	52.9245	62.0469	73.8093	92.1578	130.986
1.63649	3.42769	5.30319	7.38382	9.58503	11.8254	14.2756	17.2472	20.3462	23.7403	27.8499	33.1286	38.6841	44.8602	53.1614	62.0772	73.9515	92.3249	131.288
1.63681	3.42769	5.30408	7.38691	9.58738	11.8259	14.2925	17.2494	20.3471	23.7885	27.8521	33.1491	38.7223	44.9814	53.2216	62.1843	74.131	92.3852	131.895
1.63737	3.42769	5.30667	7.3894	9.59766	11.8305	14.305	17.2985	20.3604	23.7959	27.8719	33.1503	38.758	45.0502	53.2317	62.2323	74.3175	92.4294	132.142
1.63837	3.43528	5.30843	7.39354	9.60029	11.8571	14.3073	17.3107	20.3679	23.8287	27.9003	33.1858	38.7588	45.0546	53.5345	62.3439	74.3533	92.5579	132.991
1.64064	3.44292	5.30902	7.39995	9.61027	11.8614	14.3414	17.313	20.3726	23.8357	27.9059	33.2409	38.8041	45.0949	53.5524	62.3672	74.3745	92.5674	133.096
1.6426	3.44531	5.31165	7.41104	9.62679	11.864	14.3597	17.3399	20.3942	23.8519	27.9233	33.2555	38.8326	45.1916	53.6987	62.3999	74.3985	92.647	133.384
1.6467	3.44925	5.31243	7.41929	9.648	11.8698	14.3842	17.3423	20.4273	23.8564	27.931	33.2737	38.8999	45.2612	53.7095	62.4299	74.4294	92.6755	134.432
1.65085	3.45157	5.32579	7.42439	9.65141	11.8939	14.3889	17.3426	20.4343	23.8709	27.9629	33.3175	38.9661	45.3009	53.8067	62.4724	74.5245	92.73	138.461
1.65085	3.45409	5.33373	7.42668	9.67793	11.9269	14.4199	17.3474	20.4653	23.8718	27.9855	33.3418	38.9979	45.3093	53.8378	62.5593	74.5632	92.9747	138.747
1.65085	3.45409	5.33837	7.42864	9.6783	11.9278	14.433	17.3494	20.4739	23.9647	28.0169	33.3757	38.9995	45.3323	53.9058	62.623	74.6654	93.0628	142.109
1.65085	3.45489	5.3546	7.43741	9.68294	11.9338	14.4558	17.3753	20.4948	23.9737	28.0719	33.3763	39.0214	45.3549	53.926	62.7534	74.7786	93.4119	142.79
1.65085	3.45489	5.36192	7.44554	9.68594	11.945	14.4578	17.3914	20.5131	24.0122	28.1237	33.4117	39.064	45.3621	53.9995	62.7582	74.8586	93.468	142.84
1.65085	3.45489	5.36605	7.44554	9.6949	11.958	14.4635	17.4015	20.5601	24.0183	28.1405	33.416	39.1002	45.4019	54.0824	62.7621	74.8651	93.5043	146.046
1.65128	3.46573	5.36605	7.45549	9.70745	11.9603	14.4797	17.4106	20.581	24.0412	28.1686	33.4374	39.1049	45.514	54.097	62.8503	74.9556	93.6557	147.388
1.65297	3.46916	5.37425	7.45792	9.70789	11.9619	14.4911	17.4339	20.5958	24.0417	28.1695	33.4633	39.1049	45.5273	54.1456	62.8621	75.0743	93.762	148.368
1.65355	3.47266	5.38144	7.45899	9.71057	11.9732	14.4945	17.4727	20.6276	24.0468	28.1732	33.4799	39.132	45.5513	54.1457	62.9832	75.5351	93.7876	150.235
1.65369	3.47699	5.3832	7.46618	9.72078	11.9869	14.5089	17.4763	20.6382	24.0504	28.1882	33.4917	39.1506	45.6926	54.1518	63.0337	75.5572	94.1305	150.287
1.65399	3.47765	5.39023	7.47591	9.73549	11.989	14.5338	17.479	20.6852	24.0568	28.2032	33.5043	39.2149	45.7741	54.2233	63.0692	75.7237	94.2745	152.397
1.6552	3.47946	5.39359	7.47601	9.73729	11.9926	14.5454	17.4865	20.6865	24.0682	28.2308	33.5131	39.2224	45.7867	54.4176	63.1229	75.7237	94.3169	152.482
1.65608	3.48029	5.39726	7.47814	9.73878	12.0015	14.5456	17.4882	20.7143	24.0708	28.3307	33.5626	39.2579	45.8475	54.4187	63.1378	75.7957	94.517	152.733
1.65795	3.48029	5.39726	7.48336	9.74482	12.0062	14.5615	17.4918	20.7363	24.0885	28.4044	33.578	39.4679	45.8534	54.4374	63.2288	75.9709	94.5525	152.954
1.66126	3.4815	5.39768	7.48385	9.7467	12.0092	14.5929	17.5349	20.7749	24.1046	28.4092	33.5836	39.5048	45.9115	54.4815	63.2581	76.0039	95.2418
1.66165	3.4815	5.40419	7.48465	9.75301	12.0096	14.5936	17.5431	20.7833	24.1312	28.5523	33.633	39.6219	45.922	54.6068	63.3093	76.0366	95.6111
1.66395	3.4815	5.41791	7.48465	9.75416	12.0385	14.6032	17.5712	20.7926	24.1373	28.5968	33.6794	39.6643	45.9648	54.6379	63.3329	76.2509	95.7561
1.66395	3.4815	5.41986	7.48659	9.77013	12.0462	14.6119	17.5818	20.8022	24.2124	28.604	33.6996	39.6967	45.9659	54.6688	63.3724	76.4081	96.0365
1.66395	3.48236	5.44146	7.49678	9.78479	12.0611	14.6344	17.5987	20.8058	24.3086	28.6894	33.7027	39.731	46.0097	54.7397	63.4714	76.4223	96.5055
1.66395	3.49212	5.44752	7.49678	9.78764	12.0783	14.6375	17.6	20.8193	24.3247	28.7142	33.775	39.7455	46.0359	54.7469	63.6747	76.5303	96.6206
1.66487	3.49765	5.44752	7.5127	9.78896	12.1016	14.6958	17.6176	20.8197	24.336	28.7242	33.7929	39.75	46.0717	54.8757	63.8185	76.5738	96.655
1.66812	3.49765	5.45281	7.52902	9.792	12.1026	14.7738	17.6532	20.8374	24.3645	28.7467	33.8342	39.7673	46.1295	54.8767	63.9059	76.7636	97.4273
1.67683	3.49945	5.4572	7.53304	9.79968	12.1137	14.7754	17.6549	20.8795	24.3912	28.7656	33.9815	39.8048	46.1877	54.9252	63.9389	76.7856	97.4683
1.68029	3.50573	5.46043	7.5502	9.80069	12.1174	14.7803	17.6602	20.889	24.4046	28.7772	33.993	39.8116	46.2303	54.9665	63.9489	76.8151	97.7076
1.68363	3.50791	5.46267	7.55569	9.80441	12.1214	14.8413	17.6811	20.8948	24.4198	28.814	34.0188	39.8582	46.2977	54.9723	64.0257	76.8637	98.0111
1.68476	3.50791	5.46267	7.57411	9.818	12.1233	14.8413	17.6862	20.9228	24.4328	28.8258	34.0728	39.9248	46.3839	55.0266	64.0511	76.9105	98.1495
1.68493	3.52353	5.46417	7.57487	9.83753	12.1511	14.8435	17.7575	20.9353	24.4365	28.877	34.2259	39.9381	46.3839	55.1166	64.0563	76.9719	98.2974
1.68494	3.52353	5.47442	7.59283	9.84651	12.1586	14.8886	17.7682	20.9361	24.4415	28.8774	34.2283	39.9818	46.3896	55.1437	64.0979	76.9782	98.3233
1.68583	3.52541	5.47953	7.60015	9.84683	12.1619	14.9308	17.787	20.9657	24.552	28.8864	34.2414	40.0068	46.4029	55.1695	64.1419	77.432	98.5666
1.68852	3.52809	5.48885	7.60902	9.85049	12.1644	14.9546	17.7917	20.97	24.5624	28.9026	34.2493	40.0947	46.4779	55.2046	64.1734	77.556	99.0181
1.68868	3.52885	5.48887	7.61602	9.85251	12.1698	14.9607	17.8346	20.9832	24.5721	28.9511	34.2721	40.1042	46.5352	55.2507	64.2536	77.5867	99.494
1.68874	3.53023	5.49075	7.63473	9.88743	12.181	14.9693	17.8566	20.9832	24.6057	29.0717	34.2771	40.115	46.556	55.257	64.3924	77.6756	99.6148
1.6933	3.54551	5.51006	7.64129	9.89124	12.1841	15.0122	17.8645	21.0104	24.6756	29.0769	34.2915	40.3061	46.566	55.3366	64.4065	77.6854	99.6193
1.69457	3.54921	5.51738	7.65738	9.89285	12.186	15.0208	17.8795	21.0138	24.7174	29.093	34.4083	40.3128	46.6097	55.3367	64.4168	77.7333	99.7308
1.69521	3.54921	5.51756	7.67805	9.89849	12.186	15.045	17.8945	21.0138	24.7364	29.1609	34.4178	40.4141	46.7351	55.3902	64.6546	77.7582	99.7976
1.7009	3.54921	5.52332	7.68125	9.90485	12.2051	15.0719	17.9007	21.0226	24.7603	29.1878	34.4197	40.477	46.8145	55.4503	64.667	77.8217	99.918
1.7021	3.55108	5.52521	7.68817	9.90814	12.2182	15.0895	17.9041	21.0336	24.7785	29.2852	34.4197	40.5009	46.9465	55.4913	65.0107	77.8366	99.9813
1.70471	3.55149	5.52939	7.69215	9.92036	12.2411	15.1327	17.9159	21.043	24.7872	29.3358	34.4309	40.5278	46.9841	55.542	65.0172	77.8625	100.148
1.70837	3.56209	5.53027	7.69981	9.92184	12.258	15.1339	17.9377	21.1083	24.7981	29.3688	34.4619	40.5667	46.9914	55.5592	65.0186	77.9616	100.732
1.71343	3.56314	5.54561	7.70122	9.92479	12.2603	15.139	17.9632	21.144	24.8138	29.3917	34.4928	40.6539	47.0178	55.6029	65.1798	78.0257	100.746
1.71399	3.58531	5.55517	7.70395	9.93256	12.2703	15.1403	18.013	21.154	24.8245	29.4115	34.5202	40.6896	47.0966	55.8378	65.2246	78.0866	101.458
1.71496	3.58724	5.57416	7.70544	9.94184	12.3137	15.1403	18.0542	21.1564	24.8501	29.4343	34.5641	40.75	47.3032	55.9283	65.297	78.2396	101.716
1.71749	3.58908	5.57416	7.72092	9.94454	12.3177	15.1458	18.0645	21.1718	24.8839	29.4712	34.5952	40.8137	47.3946	55.935	65.4961	78.3259	101.726
1.7175	3.59117	5.57933	7.72358	9.94974	12.3255	15.1491	18.088	21.1869	24.8897	29.4906	34.762	40.8545	47.3997	55.9384	65.5492	78.3962	101.892
1.72012	3.5933	5.59053	7.72358	9.94981	12.3493	15.1539	18.0992	21.1946	24.9161	29.4953	34.8759	40.9027	47.4578	56.02	65.6383	78.5342	102.356
1.72266	3.59541	5.59106	7.72478	9.95692	12.3506	15.1653	18.1023	21.2066	24.9228	29.5204	34.9153	40.9027	47.5655	56.0278	65.6702	78.7077	102.413
1.72266	3.59844	5.59406	7.72538	9.96006	12.3574	15.1742	18.1225	21.2521	24.954	29.5569	34.9219	40.9659	47.5746	56.031	65.6738	78.7515	102.669
1.72266	3.6011	5.59619	7.7275	9.96756	12.3616	15.1771	18.1559	21.2988	24.9915	29.5937	34.9371	41.002	47.7003	56.0656	65.8511	78.7823	102.87
1.72459	3.60732	5.60681	7.74127	9.97211	12.3709	15.1978	18.1577	21.3061	24.9971	29.5998	34.9374	41.021	47.7003	56.2754	65.9536	78.9424	103.191
1.72763	3.61525	5.6118	7.74923	9.97267	12.4082	15.2201	18.1669	21.3317	25.0063	29.6174	34.9808	41.0532	47.7092	56.3184	65.955	79.1034	103.675
1.73279	3.62148	5.63168	7.74966	9.97364	12.4181	15.232	18.1677	21.3912	25.039	29.6393	35.0128	41.0652	47.7428	56.5469	65.9805	79.155	103.901
1.73349	3.62387	5.63996	7.75133	9.9777	12.4233	15.2349	18.1677	21.4091	25.0733	29.7814	35.0135	41.1683	47.7828	56.5828	66.1228	79.1596	103.957
1.73525	3.62552	5.65788	7.75767	9.99335	12.4263	15.24	18.2136	21.4235	25.0838	29.8605	35.0547	41.1699	47.8285	56.6422	66.3856	79.3052	104.327
1.73633	3.62954	5.66016	7.77049	9.99335	12.4281	15.264	18.2341	21.461	25.1124	29.875	35.0791	41.235	47.8821	56.6628	66.4526	79.3525	104.982
1.74015	3.63353	5.66928	7.77521	10.0044	12.4321	15.2662	18.288	21.4681	25.1546	29.8914	35.1119	41.2439	47.9018	56.6756	66.4567	79.3636	105.156
1.74015	3.63353	5.68152	7.77956	10.026	12.442	15.2685	18.2922	21.4892	25.1849	29.9487	35.162	41.2528	47.9144	56.7101	66.477	79.3689	105.917
1.74015	3.63557	5.68152	7.78217	10.0312	12.4612	15.2983	18.3031	21.5292	25.1991	30.0285	35.172	41.3122	47.9649	56.7743	66.5064	79.3975	106.202
1.74015	3.65053	5.69113	7.78217	10.0313	12.4612	15.2988	18.317	21.5633	25.2219	30.0456	35.1935	41.3628	48.011	56.7945	66.5972	79.4998	107.216
1.7444	3.65343	5.70878	7.78883	10.0435	12.4977	15.2994	18.3555	21.5694	25.2315	30.0597	35.2155	41.3906	48.0212	56.8152	66.6987	79.5595	107.272
1.74644	3.65714	5.71047	7.79503	10.0435	12.5129	15.3199	18.3705	21.5848	25.3117	30.0698	35.2932	41.3972	48.0898	56.837	66.8994	79.6821	107.395
1.75396	3.65845	5.71381	7.79716	10.0447	12.5189	15.3232	18.4105	21.5858	25.319	30.077	35.411	41.403	48.1314	56.8903	66.9671	79.7283	107.789
1.75396	3.65845	5.7173	7.80505	10.0641	12.523	15.3764	18.411	21.6031	25.3275	30.1613	35.4281	41.5571	48.2093	56.9221	66.9674	79.7348	108.245
1.75396	3.65845	5.71943	7.81792	10.086	12.5315	15.3771	18.4188	21.6285	25.3692	30.1841	35.4512	41.5578	48.361	57.0094	67.1586	79.7534	108.307
1.75396	3.66055	5.72006	7.82098	10.0939	12.532	15.4065	18.4291	21.6298	25.3961	30.1934	35.4546	41.6139	48.5023	57.0103	67.1908	79.7955	108.419
1.75396	3.66346	5.72142	7.82101	10.0981	12.5484	15.4079	18.4406	21.6516	25.4037	30.1956	35.4567	41.617	48.5697	57.0534	67.2732	79.8722	108.791
1.75396	3.66363	5.72457	7.83549	10.1018	12.5496	15.4288	18.4669	21.6786	25.5191	30.2204	35.4569	41.6183	48.5722	57.0633	67.4409	80.0183	108.807
1.75396	3.66708	5.72661	7.83625	10.1058	12.5775	15.4472	18.5095	21.6814	25.5274	30.2314	35.4921	41.7028	48.6178	57.1197	67.4611	80.0202	108.915
1.75985	3.67083	5.72661	7.84763	10.1168	12.5914	15.4472	18.5135	21.6839	25.6044	30.2785	35.5083	41.7533	48.674	57.1741	67.4791	80.0734	108.924
1.75995	3.67261	5.73984	7.85773	10.1348	12.6106	15.4507	18.5228	21.6984	25.6434	30.3262	35.5135	41.7816	48.7551	57.2177	67.4943	80.1382	109.361
1.76023	3.67575	5.74512	7.87239	10.1567	12.6149	15.4836	18.5373	21.7748	25.6498	30.3457	35.6269	41.8164	48.799	57.2405	67.5644	80.3039	109.494
1.76176	3.68748	5.76091	7.87315	10.1712	12.6283	15.5059	18.5399	21.7748	25.6929	30.4132	35.6912	41.8174	48.9386	57.2468	67.644	80.3488	109.605
1.76194	3.68748	5.76442	7.87884	10.1729	12.6496	15.5117	18.5497	21.7763	25.7158	30.4242	35.7093	41.8866	49.0264	57.397	67.7331	80.3714	110.093
1.76454	3.68748	5.76616	7.89037	10.1735	12.6534	15.512	18.5524	21.7939	25.8129	30.4361	35.7726	41.9138	49.0468	57.399	67.7455	80.5806	110.912
1.76637	3.6996	5.76942	7.89572	10.1791	12.6541	15.5135	18.5629	21.8361	25.8191	30.4532	35.841	42.1496	49.1103	57.4222	67.7612	80.6061	111.179
1.76773	3.6996	5.77379	7.89939	10.181	12.657	15.5263	18.6207	21.842	25.8914	30.5097	35.8487	42.2623	49.1381	57.4585	67.8156	80.6121	111.256
1.76885	3.7025	5.7777	7.90725	10.1882	12.6601	15.539	18.7047	21.8858	25.9241	30.5523	35.854	42.283	49.143	57.5736	67.9379	80.7188	111.448
1.76987	3.7123	5.7844	7.92971	10.197	12.6665	15.5583	18.7077	21.8938	26.008	30.5555	35.8655	42.2833	49.2017	57.6285	68.0221	80.7403	111.461
1.77272	3.72068	5.78713	7.93576	10.1994	12.6673	15.5676	18.7177	21.8945	26.008	30.585	35.9464	42.3374	49.2464	57.7285	68.0542	80.8631	112.181
1.77461	3.7207	5.79071	7.93628	10.2134	12.6723	15.5773	18.7223	21.9134	26.0601	30.5989	35.983	42.366	49.2536	57.7354	68.1218	80.9495	112.501
1.77461	3.7207	5.79496	7.93641	10.2172	12.6817	15.5777	18.7476	21.9479	26.0861	30.6279	36.0021	42.386	49.2538	57.7755	68.2217	80.9682	112.631
1.77461	3.72896	5.79767	7.9367	10.2322	12.6908	15.5878	18.7629	21.9566	26.0906	30.6523	36.0353	42.4681	49.4985	57.8278	68.3786	81.1736	112.804
1.77461	3.73219	5.80634	7.9375	10.247	12.7043	15.5897	18.7747	21.9719	26.111	30.7391	36.0559	42.4897	49.5645	57.9572	68.4353	81.5666	112.974
1.77461	3.7381	5.80663	7.9425	10.2802	12.7106	15.5906	18.7813	22.0301	26.1277	30.767	36.1148	42.5326	49.6388	57.9779	68.4676	81.5774	113.207
1.77461	3.7391	5.80802	7.95286	10.288	12.7291	15.6278	18.7948	22.0314	26.1601	30.91	36.159	42.5465	49.6713	58.0102	68.609	82.0345	113.353
1.77461	3.74012	5.80802	7.96318	10.3199	12.7423	15.6342	18.8209	22.0482	26.1937	30.9139	36.2227	42.6063	49.6738	58.0163	68.7202	82.129	113.444
1.77575	3.74512	5.82964	7.96322	10.3225	12.752	15.6447	18.8354	22.0731	26.2078	31.0361	36.2556	42.673	49.7202	58.0786	69.0092	82.619	113.795
1.77741	3.74839	5.82996	7.96484	10.3271	12.7708	15.6447	18.8386	22.0776	26.2664	31.0637	36.2894	42.6829	49.7207	58.0828	69.0173	82.6707	113.848
1.77803	3.74839	5.83403	7.97333	10.3301	12.7898	15.6613	18.8386	22.1659	26.2783	31.1417	36.2961	42.7224	49.7207	58.0828	69.0274	82.6981	113.965
1.77902	3.75224	5.83403	7.97881	10.3366	12.8347	15.7057	18.8581	22.1826	26.2906	31.1834	36.3757	42.7729	49.731	58.0875	69.0502	83.1975	114.02
1.77973	3.75363	5.8347	7.99927	10.3389	12.8529	15.7197	18.9051	22.186	26.2944	31.1931	36.3943	42.8655	49.812	58.1115	69.0577	83.325	114.235
1.78171	3.75487	5.83793	7.99965	10.3464	12.853	15.7231	18.9217	22.2009	26.2988	31.2514	36.3993	42.9344	49.8454	58.2013	69.0881	83.3546	114.762
1.78176	3.75574	5.84942	8.00467	10.3476	12.8559	15.7231	18.9227	22.2255	26.3228	31.2578	36.5431	42.9379	49.9637	58.2286	69.1015	83.4254	114.948
1.78869	3.75646	5.86567	8.00499	10.3506	12.8771	15.7269	18.932	22.2288	26.3568	31.2694	36.6067	42.9405	49.9788	58.2536	69.2679	83.4871	114.965
1.78992	3.75646	5.86776	8.01223	10.3523	12.8848	15.7441	18.9412	22.2294	26.3722	31.3575	36.7571	42.9528	50.2206	58.2707	69.3465	83.797	115.846
1.79159	3.75646	5.87025	8.01223	10.358	12.8984	15.7759	18.9636	22.2333	26.3814	31.3909	36.7616	43.0692	50.4246	58.3031	69.4612	84.118	115.981
1.79159	3.75646	5.88474	8.01464	10.3658	12.9008	15.7898	18.9834	22.2452	26.4447	31.5013	36.7721	43.0727	50.4353	58.4262	69.4948	84.2378	116.023
1.79159	3.76262	5.89601	8.01601	10.3884	12.9607	15.8191	18.9923	22.2983	26.4594	31.5517	36.8388	43.084	50.4516	58.5062	69.5087	84.2985	116.26
1.79159	3.76436	5.90995	8.02462	10.3937	12.9775	15.822	19.0027	22.3047	26.4708	31.5777	36.8623	43.1001	50.4516	58.6225	69.5728	84.5019	116.357
1.79159	3.76451	5.91137	8.03265	10.3957	12.984	15.8253	19.0285	22.3104	26.4834	31.5864	36.9606	43.1979	50.4642	58.6716	69.6197	84.9142	116.409
1.79159	3.76451	5.91137	8.03488	10.4104	12.9959	15.8497	19.0449	22.338	26.5245	31.621	37.0466	43.2572	50.5236	58.7184	69.7423	85.0876	116.438
1.79589	3.76451	5.91137	8.04413	10.4213	12.9982	15.8497	19.0512	22.3706	26.5423	31.685	37.0599	43.2691	50.5457	58.7442	69.8252	85.126	116.594
1.80078	3.76539	5.91197	8.04617	10.4277	12.9988	15.8516	19.0531	22.4117	26.5544	31.7273	37.0696	43.2691	50.5841	58.7685	70.0296	85.6357	116.947
1.80277	3.77402	5.91467	8.04749	10.4467	13.0003	15.8764	19.0655	22.4287	26.5606	31.7396	37.1235	43.2768	50.7715	58.7766	70.0575	85.6509	117.127
1.80581	3.77635	5.9165	8.04911	10.4563	13.0406	15.8821	19.0689	22.4486	26.5978	31.7655	37.2583	43.2789	51.0103	58.8436	70.0743	85.8976	117.224
1.80581	3.77814	5.9165	8.05419	10.4596	13.043	15.8878	19.0851	22.4607	26.6293	31.8252	37.2644	43.3237	51.1526	58.8452	70.0931	86.0505	117.634
1.80581	3.78089	5.9165	8.05804	10.4651	13.0453	15.8899	19.0907	22.4971	26.6396	31.8739	37.2888	43.3467	51.1801	58.8596	70.1337	86.1824	117.854
1.80581	3.78378	5.92014	8.07248	10.4698	13.055	15.9068	19.1105	22.5132	26.6509	31.9164	37.2916	43.427	51.1828	59.0482	70.1484	86.2789	117.878
1.80581	3.79439	5.92672	8.07285	10.4785	13.0735	15.9126	19.121	22.5521	26.6782	31.9431	37.3622	43.4301	51.207	59.0602	70.2838	86.2961	118.13
1.80633	3.79439	5.93903	8.07582	10.5071	13.0926	15.9416	19.1214	22.5683	26.7007	31.9767	37.4038	43.5092	51.2594	59.1245	70.5976	86.4697	118.237
1.80713	3.79476	5.94476	8.07582	10.5101	13.1066	15.962	19.1448	22.5683	26.7554	32.0109	37.4058	43.5141	51.2868	59.2018	70.61	86.7647	118.327
1.81072	3.7988	5.94712	8.07709	10.5131	13.1194	15.9639	19.1511	22.5708	26.8109	32.0451	37.4232	43.537	51.3086	59.2693	70.6285	86.794	118.407
1.81221	3.8025	5.94712	8.07891	10.5267	13.1332	15.9643	19.1575	22.5763	26.8184	32.1096	37.4556	43.6301	51.3261	59.2879	70.647	86.8735	118.45
1.81487	3.8204	5.95152	8.08638	10.5333	13.1568	15.9732	19.1735	22.5777	26.8547	32.1395	37.4607	43.6946	51.3812	59.3122	70.7287	87.1304	118.945
1.81786	3.8204	5.95221	8.09347	10.5377	13.2049	16.0131	19.2049	22.6789	26.8706	32.1518	37.4839	43.722	51.4053	59.3142	70.8238	87.409	118.959
1.81834	3.8204	5.95312	8.13544	10.5413	13.2068	16.0245	19.2072	22.6966	26.8928	32.171	37.5428	43.7684	51.4071	59.3501	70.8344	87.4314	118.96
1.82397	3.8204	5.95312	8.13594	10.5471	13.2254	16.0433	19.2074	22.7324	26.9447	32.1745	37.6033	43.7901	51.5118	59.3596	71.0968	87.4353	119.135
1.82796	3.8204	5.9573	8.14715	10.5488	13.2297	16.0582	19.2506	22.7527	26.9615	32.1748	37.6451	43.8524	51.5371	59.3948	71.159	87.5665	119.205
1.82984	3.82626	5.9573	8.15051	10.5508	13.2457	16.0641	19.2599	22.774	27.0168	32.1833	37.6805	43.8594	51.631	59.5116	71.2092	87.7399	119.447
1.83315	3.82729	5.95829	8.15087	10.5706	13.2507	16.0656	19.2731	22.7805	27.0356	32.1868	37.7285	43.9771	51.6334	59.5338	71.3167	87.763	120.844
1.83368	3.82832	5.96098	8.15458	10.5716	13.2664	16.0698	19.2817	22.7869	27.0714	32.187	37.7287	44.103	51.6545	59.5442	71.3509	87.7731	120.866
1.83453	3.82832	5.96345	8.15458	10.5966	13.296	16.1093	19.2891	22.8375	27.0748	32.2242	37.8577	44.1332	51.6826	59.6344	71.4094	87.8693	121.457
1.83614	3.83251	5.96614	8.18054	10.602	13.3311	16.1318	19.2999	22.8602	27.1357	32.242	37.8625	44.1335	51.7529	59.8064	71.5134	88.1102	121.715
1.83616	3.83624	5.97405	8.18054	10.6169	13.3391	16.1375	19.3007	22.8655	27.1663	32.2585	37.8914	44.156	51.7569	59.8777	71.5257	88.1586	122.023
1.83899	3.83726	5.98435	8.19163	10.6277	13.3434	16.1548	19.3302	22.9301	27.1786	32.2729	37.9056	44.1606	51.7581	59.8863	71.5896	88.3766	122.063
1.84134	3.83835	5.98772	8.19348	10.6385	13.3453	16.1774	19.354	22.9386	27.2187	32.3321	37.9112	44.1669	51.8002	59.9277	71.7957	88.5449	122.463
1.84276	3.84026	5.99277	8.19533	10.6398	13.357	16.1833	19.354	22.9687	27.2265	32.3551	37.9344	44.2011	51.8388	60.2031	71.9943	88.6354	123.299
1.84374	3.84408	5.99277	8.20057	10.6436	13.3652	16.2163	19.3574	22.9719	27.2309	32.366	37.9926	44.2011	51.9492	60.2854	71.9949	88.9383	123.666
1.84593	3.84411	5.99288	8.2063	10.6476	13.3889	16.2268	19.3618	23.0042	27.2445	32.3769	38.0176	44.2052	51.9997	60.308	72.1252	88.9516	124.364
1.84634	3.84411	5.99431	8.21181	10.6505	13.4152	16.259	19.409	23.0225	27.2587	32.5186	38.0546	44.2086	52.0252	60.5311	72.1626	89.1135	124.727
1.84664	3.85198	5.99863	8.21673	10.6549	13.4222	16.2653	19.4098	23.0586	27.2887	32.5202	38.0587	44.2208	52.0353	60.5529	72.1798	89.1841	125.329
1.84934	3.85198	6.00458	8.22483	10.6781	13.4634	16.2712	19.4156	23.0687	27.3022	32.5206	38.0886	44.249	52.1396	60.5646	72.3666	89.2503	125.455
1.84951	3.85198	6.00612	8.22483	10.7057	13.4753	16.2887	19.4492	23.083	27.3175	32.5468	38.098	44.3678	52.1672	60.6031	72.5092	89.2503	125.52
1.85057	3.85423	6.02173	8.22483	10.7298	13.5009	16.2941	19.4516	23.0956	27.3763	32.5547	38.1748	44.4504	52.2212	60.622	72.5313	89.2871	125.616
1.85083	3.85485	6.0267	8.25424	10.7495	13.5407	16.3168	19.4554	23.1087	27.4322	32.5547	38.2097	44.5436	52.238	60.7107	72.5313	89.3141	126.448
1.85118	3.85841	6.03524	8.2689	10.7498	13.5407	16.3523	19.4912	23.1092	27.4347	32.6121	38.2895	44.5695	52.3026	60.7333	72.6405	89.3297	126.742
1.85438	3.86026	6.03731	8.2689	10.7802	13.5441	16.3523	19.4927	23.1289	27.4544	32.6369	38.3125	44.6346	52.3185	60.7807	72.7527	89.4543	126.747
1.85906	3.86369	6.04034	8.27009	10.7886	13.5731	16.3611	19.5408	23.1446	27.4553	32.6434	38.3574	44.6455	52.3375	60.8852	72.8379	89.6167	127.014
1.86328	3.86618	6.04697	8.28718	10.8064	13.583	16.3611	19.568	23.1464	27.4869	32.6671	38.4048	44.665	52.4185	60.9384	72.8703	89.7841	127.404
1.87063	3.86879	6.05348	8.29991	10.8094	13.5887	16.3739	19.578	23.1537	27.4885	32.6749	38.4111	44.7061	52.448	60.9762	72.9289	90.2362	127.65
1.87419	3.87087	6.05821	8.30179	10.8273	13.591	16.4069	19.5964	23.1707	27.5743	32.6911	38.4198	44.7241	52.4561	61.0166	73.1036	90.4598	129.994
1.87419	3.87809	6.06463	8.3032	10.833	13.6239	16.407	19.6274	23.1943	27.6721	32.721	38.4419	44.739	52.4946	61.0716	73.2142	90.7562	131.196
1.87419	3.88739	6.0711	8.30638	10.8333	13.6322	16.4165	19.66	23.1989	27.709	32.7217	38.4985	44.8134	52.4988	61.0833	73.2222	91.0258	133.358
1.87419	3.89108	6.07807	8.30996	10.8533	13.6443	16.422	19.6672	23.2659	27.8211	32.7221	38.5123	44.8323	52.5967	61.1967	73.2439	91.2689	134.467
1.87419	3.89108	6.07807	8.31051	10.8541	13.6516	16.4407	19.6709	23.2953	27.8251	32.7314	38.5826	44.8526	52.6002	61.2676	73.2663	91.3111	134.746
1.87419	3.89108	6.07807	8.31167	10.8605	13.6649	16.4607	19.7075	23.2958	27.8388	32.7882	38.5999	44.8554	52.6129	61.3355	73.295	91.7626	136.608
1.87419	3.89108	6.07807	8.31487	10.8777	13.6754	16.4704	19.708	23.3441	27.8713	32.8422	38.6399	44.8782	52.6449	61.4806	73.3593	91.9653	137.394
1.87419	3.89488	6.08094	8.3153	10.8783	13.6758	16.5423	19.73	23.448	27.9142	32.9159	38.7314	45.0358	52.6462	61.5184	73.4416	91.9917	140.178
1.87574	3.89632	6.08094	8.33145	10.8802	13.6828	16.5926	19.7443	23.4716	27.9618	32.9441	38.7588	45.1875	52.7933	61.5236	73.4453	92.3494	140.436
1.88384	3.90397	6.08195	8.35044	10.8978	13.691	16.6386	19.7496	23.4939	27.9936	32.9472	38.8501	45.2009	52.8497	61.5613	73.5475	93.0853	142.602
1.88653	3.90854	6.08683	8.37081	10.905	13.6959	16.644	19.7554	23.4974	27.9974	32.9629	38.8563	45.2032	52.8936	61.6206	73.6515	93.302	144.081
1.88681	3.91133	6.08802	8.37576	10.9067	13.6974	16.6546	19.7567	23.512	28.0319	33.0509	38.8574	45.2092	53.0587	61.6341	73.698	93.4499	144.277
1.88907	3.91319	6.09139	8.3899	10.9077	13.7033	16.6654	19.7857	23.5205	28.059	33.0683	39.0018	45.2242	53.0672	61.8303	73.76	93.5159	145.828
1.88907	3.91336	6.09156	8.3905	10.9236	13.7108	16.6709	19.7972	23.5527	28.1377	33.0767	39.0506	45.2438	53.1226	61.9348	73.8531	93.5933	146.135
1.88907	3.91354	6.09299	8.39136	10.9283	13.7213	16.68	19.7975	23.5557	28.2412	33.0849	39.0855	45.2612	53.3479	62.0176	73.9662	93.5946	146.411
1.88907	3.92061	6.09299	8.39588	10.9283	13.7322	16.6805	19.7979	23.5698	28.273	33.0875	39.1188	45.3488	53.3739	62.0781	73.9995	93.7986	146.578
1.88907	3.92197	6.09556	8.40045	10.9394	13.7477	16.7191	19.8072	23.5762	28.2847	33.1256	39.1877	45.3514	53.3887	62.1035	74.0149	93.9247
1.88907	3.92197	6.10077	8.41272	10.9449	13.7483	16.7296	19.8119	23.5767	28.3291	33.1417	39.2163	45.4321	53.4069	62.1103	74.0795	94.3262
1.88907	3.92275	6.10404	8.4177	10.9532	13.7681	16.7315	19.8483	23.5801	28.3846	33.1554	39.3156	45.5644	53.412	62.1877	74.1776	94.4596
1.88907	3.9241	6.11145	8.4263	10.9753	13.7747	16.7362	19.869	23.6314	28.4116	33.1835	39.3204	45.5752	53.4273	62.2622	74.183	94.4747
1.8969	3.92715	6.12158	8.4277	10.9762	13.7794	16.7362	19.8826	23.6353	28.4448	33.1842	39.3265	45.6011	53.5298	62.2695	74.1976	94.5628
1.89986	3.94518	6.12631	8.43359	11.0103	13.7999	16.738	19.8864	23.6775	28.4844	33.2227	39.3519	45.6993	53.5677	62.2739	74.4022	94.9456
1.90105	3.94518	6.13019	8.43424	11.0363	13.8164	16.7507	19.9134	23.6946	28.4846	33.303	39.3942	45.7602	53.5993	62.3942	74.5014	95.0527
1.90215	3.94518	6.13251	8.43724	11.0605	13.8327	16.7519	19.9432	23.8073	28.5405	33.3691	39.4631	45.8897	53.5993	62.4385	74.5343	95.055
1.90809	3.94622	6.14244	8.44817	11.0621	13.8348	16.794	19.944	23.8263	28.5674	33.4008	39.504	45.9105	53.8023	62.4715	74.5439	95.2561
1.91183	3.95583	6.15065	8.45176	11.0702	13.8418	16.8069	19.9708	23.8914	28.6422	33.426	39.6126	45.922	53.8137	62.5319	74.5546	95.2586
1.91295	3.95979	6.15234	8.45247	11.0739	13.8706	16.8258	19.9958	23.932	28.6623	33.4479	39.683	45.9752	53.8349	62.5495	74.6135	95.5833
1.91929	3.96123	6.15234	8.46644	11.0829	13.8994	16.8291	20.0215	23.9433	28.697	33.466	39.7038	46.0286	53.9035	62.6521	74.7323	95.6643
1.92042	3.96492	6.15522	8.46791	11.093	13.8995	16.8524	20.0306	23.9471	28.6992	33.4703	39.7218	46.1199	53.9176	62.8426	74.8028	96.1484
1.92205	3.96814	6.15596	8.49838	11.102	13.9081	16.8632	20.0368	23.9521	28.7154	33.4914	39.8916	46.1529	53.94	62.8889	74.9621	96.2104
1.92205	3.96814	6.16399	8.51921	11.1118	13.9081	16.869	20.13	23.9963	28.7214	33.5293	39.8995	46.1719	54.034	62.9582	75.0602	96.268
1.92205	3.96814	6.16465	8.52265	11.1214	13.9127	16.8696	20.1431	24.0027	28.7259	33.6557	39.9051	46.227	54.0382	63.0295	75.0912	96.5255
1.92205	3.96875	6.172	8.52849	11.1288	13.9255	16.8836	20.1452	24.0054	28.794	33.6861	39.9113	46.331	54.0547	63.1124	75.1052	96.582
1.92205	3.97515	6.172	8.52849	11.1369	13.9508	16.8963	20.159	24.0129	28.8098	33.6972	39.9916	46.4133	54.097	63.1473	75.1844	97.1057
1.92859	3.97577	6.18176	8.55613	11.1466	13.9763	16.8963	20.1624	24.0196	28.8227	33.7298	40.0158	46.4642	54.1965	63.1483	75.2138	97.1425
1.92999	3.97649	6.18243	8.55807	11.1621	13.978	16.9144	20.187	24.0367	28.8308	33.7606	40.037	46.5024	54.2292	63.1546	75.215	97.1743
1.93079	3.97649	6.18826	8.56038	11.1629	13.9906	16.9269	20.1896	24.0402	28.8418	33.8045	40.068	46.5872	54.2351	63.1555	75.3051	97.3838
1.93529	3.97649	6.19953	8.56232	11.1869	13.9906	16.9382	20.2125	24.0626	28.8703	33.8663	40.071	46.6368	54.2729	63.2389	75.3244	97.5103
1.93567	3.98527	6.20197	8.56996	11.1932	13.9906	16.9633	20.2503	24.1749	28.9792	33.8663	40.1125	46.6372	54.3225	63.5094	75.5412	97.6732
1.93731	3.98608	6.20348	8.57099	11.1939	13.9928	16.9759	20.2548	24.1937	29.0432	33.9116	40.1404	46.6729	54.3332	63.5213	75.5424	98.0457
1.94238	3.98615	6.20813	8.57378	11.1958	13.9992	16.9853	20.3679	24.1937	29.061	33.9136	40.1699	46.6995	54.3639	63.531	75.5523	98.5162
1.94393	3.98723	6.214	8.59645	11.2022	14.0067	16.9876	20.3961	24.2087	29.0874	33.9163	40.1925	46.7513	54.4009	63.5469	75.5796	98.8099
1.94679	3.98834	6.21604	8.6126	11.2061	14.0069	16.9972	20.3976	24.222	29.09	33.933	40.2448	46.887	54.4157	63.6603	75.6533	98.8458
1.95041	3.98983	6.21604	8.61328	11.2061	14.0126	17.0438	20.4334	24.2428	29.1276	34.0091	40.261	46.9317	54.4445	63.7717	75.78	98.997
1.95089	3.99165	6.22573	8.61328	11.2093	14.0214	17.0486	20.4491	24.2686	29.1409	34.0135	40.27	46.9432	54.4857	63.9048	75.8021	99.9762
1.9519	3.9971	6.22814	8.61443	11.2097	14.0346	17.0901	20.4732	24.3248	29.1486	34.0188	40.3188	46.9484	54.5352	64.0014	76.0366	100.252
1.95459	3.99964	6.23766	8.61446	11.2194	14.0618	17.1208	20.504	24.3658	29.165	34.0873	40.3338	47.0451	54.5468	64.1404	76.1961	100.662
1.95468	3.99964	6.25287	8.61649	11.2236	14.0769	17.1306	20.5087	24.3683	29.2065	34.1867	40.3546	47.0606	54.5474	64.1607	76.2184	100.72
1.95525	4.00612	6.25556	8.62197	11.2237	14.0774	17.154	20.5131	24.3754	29.2148	34.2389	40.3792	47.1172	54.564	64.2041	76.5189	101.018
1.95878	4.00732	6.26452	8.64136	11.2263	14.0784	17.1579	20.5621	24.3816	29.2302	34.2841	40.3954	47.1228	54.6134	64.2338	76.545	101.258
1.96122	4.00732	6.28005	8.64293	11.2263	14.0915	17.172	20.5663	24.3943	29.2512	34.3044	40.3961	47.1608	54.6755	64.3609	76.5494	101.722
1.96321	4.00806	6.28865	8.64486	11.2721	14.0941	17.1727	20.57	24.45	29.2883	34.312	40.4321	47.1674	54.6784	64.4089	76.5747	101.856
1.96357	4.01017	6.29451	8.6497	11.2721	14.0953	17.1798	20.5809	24.4987	29.2933	34.3378	40.459	47.2228	54.6988	64.5244	76.5791	102.144
1.96875	4.01046	6.30308	8.65537	11.3079	14.102	17.2207	20.5894	24.5044	29.4337	34.3404	40.4695	47.2462	54.7153	64.6534	76.6816	102.158
1.96875	4.01688	6.30511	8.6639	11.3127	14.1126	17.2227	20.6153	24.533	29.4397	34.4062	40.4817	47.2731	54.7264	64.7224	76.698	102.372
1.96875	4.01906	6.30801	8.67472	11.3237	14.1526	17.2299	20.6403	24.5557	29.456	34.4197	40.5164	47.2812	54.771	64.7379	76.8601	102.952
1.96875	4.02679	6.30859	8.67502	11.331	14.1545	17.2353	20.6716	24.5686	29.4953	34.4619	40.5166	47.2993	54.8016	64.9389	76.8712	103.057
1.96875	4.02872	6.32398	8.68045	11.3364	14.1603	17.2468	20.6733	24.6567	29.5469	34.4885	40.5346	47.3684	54.8414	64.9916	76.9333	103.402
1.97058	4.03419	6.32705	8.68646	11.3371	14.1681	17.2671	20.6792	24.7136	29.5717	34.5031	40.5653	47.5732	54.8927	65.0214	77.3087	103.52
1.9713	4.03624	6.32879	8.6904	11.3437	14.1789	17.2792	20.6797	24.7688	29.5987	34.5315	40.6145	47.5887	54.8991	65.1814	77.3674	103.627
1.97182	4.03624	6.33389	8.70752	11.3538	14.1819	17.2845	20.7002	24.8281	29.5987	34.5326	40.626	47.6075	54.9423	65.2153	77.646	103.926
1.97616	4.03624	6.37052	8.70769	11.3615	14.2011	17.2948	20.7216	24.8445	29.6051	34.5489	40.6293	47.6274	55.0686	65.3002	77.6667	103.974
1.97743	4.03741	6.38164	8.71347	11.363	14.2246	17.3163	20.7455	24.8603	29.704	34.7585	40.7379	47.6773	55.1228	65.4443	77.9516	104.272
1.97762	4.03781	6.38268	8.72406	11.402	14.2629	17.3329	20.7479	24.8606	29.7151	34.7864	40.7763	47.6813	55.1504	65.4461	78.0525	104.467
1.98407	4.03791	6.38703	8.72853	11.4042	14.2704	17.3598	20.7569	24.8859	29.7211	34.8003	40.7789	47.7982	55.1651	65.4854	78.5413	104.516
1.98407	4.03791	6.38897	8.73446	11.4227	14.2733	17.3631	20.7721	24.9241	29.7573	34.8029	40.7893	47.8056	55.1728	65.5945	78.5795	104.719
1.98407	4.03791	6.39112	8.73893	11.4229	14.3062	17.3651	20.8092	24.9279	29.8482	34.8137	40.8397	47.8258	55.1966	65.7236	78.7273	105.189
1.98407	4.04259	6.40495	8.75243	11.4344	14.3103	17.4049	20.8178	24.9591	29.8619	34.8464	40.8582	47.8866	55.2209	65.7287	78.8461	105.277
1.98407	4.05868	6.4095	8.75299	11.448	14.3133	17.4113	20.8498	25.0012	29.8748	34.8811	40.8731	47.9251	55.2365	65.8594	78.9113	105.585
1.98407	4.05965	6.41097	8.75368	11.4532	14.3369	17.4199	20.91	25.0158	29.8839	34.8881	40.9412	47.9251	55.2578	66.0802	78.9712	106.183
1.98407	4.06648	6.41942	8.75656	11.4612	14.3611	17.4283	20.914	25.0303	29.9453	34.9139	40.9885	47.9422	55.2646	66.1969	79.2655	106.191
1.98407	4.07358	6.41975	8.76017	11.467	14.3848	17.4656	20.918	25.103	29.9655	34.916	41.044	47.9933	55.3361	66.2267	79.3781	106.192
1.98407	4.07412	6.42969	8.76315	11.4692	14.4023	17.4791	20.9265	25.1317	29.9713	34.9505	41.0741	47.9984	55.4099	66.2395	79.5728	106.334
1.98407	4.10591	6.44089	8.77537	11.4775	14.4028	17.482	20.9831	25.2147	30.029	34.9808	41.229	48.0324	55.4145	66.2449	79.7192	106.705
1.98407	4.10591	6.44089	8.7908	11.4816	14.4086	17.5117	21.0189	25.2471	30.0528	34.995	41.234	48.0394	55.4913	66.4202	79.8148	106.994
1.98407	4.10673	6.44399	8.8217	11.484	14.4091	17.5418	21.0475	25.2524	30.0853	35.0051	41.2682	48.0462	55.5059	66.4433	79.9013	107.051
1.98407	4.1112	6.44449	8.82465	11.4877	14.4098	17.5521	21.067	25.295	30.1404	35.0604	41.2763	48.0835	55.5066	66.4815	80.0138	107.218
1.98407	4.11146	6.44653	8.82652	11.4976	14.4191	17.5615	21.091	25.3714	30.1573	35.0841	41.3332	48.1316	55.5599	66.5514	80.2767	107.473
1.98419	4.1175	6.44922	8.8327	11.5078	14.4209	17.5712	21.1039	25.4383	30.1653	35.1053	41.3445	48.1502	55.6422	66.5769	80.3717	107.648
1.98438	4.1189	6.4503	8.84142	11.5415	14.4303	17.5755	21.1612	25.4442	30.1708	35.1279	41.3445	48.2268	55.72	66.5828	80.3898	107.924
1.98438	4.12273	6.45399	8.84469	11.569	14.4316	17.6002	21.1888	25.4617	30.2655	35.1722	41.3628	48.24	55.8143	66.5864	80.4316	108.002
1.98438	4.12528	6.45967	8.87304	11.569	14.438	17.6125	21.1998	25.4918	30.2705	35.2462	41.406	48.2501	55.8161	66.6409	80.5012	108.191
1.98438	4.13138	6.45967	8.87304	11.569	14.4567	17.6141	21.2113	25.5155	30.271	35.2567	41.4364	48.2552	55.9531	66.9125	80.5704	108.584
1.98438	4.13905	6.45967	8.87304	11.5788	14.4778	17.6228	21.2626	25.5199	30.2855	35.3528	41.4527	48.2557	55.9932	66.9904	80.6061	108.611
1.98762	4.14013	6.45994	8.87839	11.5873	14.4967	17.6281	21.2803	25.5311	30.3106	35.3934	41.4586	48.3087	56.0258	67.0013	80.6803	108.786
1.98771	4.14435	6.46135	8.89959	11.5879	14.5383	17.6763	21.3535	25.5331	30.3135	35.4776	41.4901	48.3098	56.1134	67.0722	80.7941	108.884
1.99234	4.15113	6.47372	8.91389	11.6054	14.5673	17.7205	21.3599	25.5474	30.3286	35.5642	41.5089	48.3504	56.1396	67.0988	81.0997	109.096
1.99758	4.15548	6.47391	8.9255	11.6067	14.5695	17.7205	21.3632	25.5476	30.3383	35.5642	41.5308	48.3604	56.2285	67.1237	81.4957	109.283
1.99982	4.15802	6.47505	8.92969	11.6082	14.5757	17.7464	21.3843	25.628	30.3505	35.5677	41.6017	48.4581	56.2476	67.2237	81.5458	109.311
1.99982	4.1619	6.47871	8.93055	11.616	14.5828	17.7482	21.4045	25.6294	30.3839	35.6339	41.619	48.4773	56.3232	67.2467	81.6208	109.553
1.99982	4.17191	6.47953	8.95617	11.6238	14.5888	17.7523	21.4045	25.6658	30.4043	35.6454	41.6778	48.5573	56.4328	67.2921	81.662	109.559
1.99982	4.17519	6.48674	8.95654	11.6395	14.6067	17.7682	21.4098	25.7319	30.4411	35.6462	41.6887	48.5678	56.4762	67.3376	81.9112	109.74
1.99982	4.17602	6.49703	8.95708	11.6445	14.6089	17.7688	21.4328	25.7907	30.4563	35.7209	41.6946	48.6259	56.5323	67.387	81.9143	109.775
1.99982	4.18011	6.49706	8.98158	11.6584	14.6118	17.7735	21.4328	25.8246	30.5127	35.7209	41.7207	48.6727	56.5547	67.4247	81.9566	109.964
1.99982	4.1807	6.49706	8.98324	11.6694	14.6328	17.7768	21.4328	25.9056	30.5144	35.798	41.8905	48.7464	56.5547	67.4247	82.2366	110.066
1.99982	4.18192	6.49706	9.01373	11.6707	14.6379	17.7806	21.4328	25.9242	30.5619	35.8547	41.9277	48.7698	56.5614	67.4517	82.4546	110.25
1.99982	4.18359	6.49986	9.0154	11.6898	14.6465	17.8015	21.5056	25.9346	30.6155	36.0319	41.9574	48.7713	56.6101	67.4943	82.5717	110.301
2.00602	4.18359	6.50143	9.03376	11.7003	14.6524	17.8465	21.5157	25.9369	30.6265	36.0492	41.9841	48.8488	56.6243	67.5982	82.6355	110.315
2.0069	4.19029	6.51759	9.03579	11.7023	14.6684	17.8499	21.5192	25.9443	30.6546	36.0718	42.087	48.8885	56.903	67.6932	82.7947	110.855
2.00867	4.19083	6.51976	9.05545	11.7224	14.6772	17.8698	21.5387	25.9738	30.6746	36.102	42.0885	48.9077	57.0624	67.7205	82.8046	111.002
2.01472	4.19083	6.53447	9.05545	11.7328	14.6794	17.8825	21.5387	25.982	30.7067	36.1314	42.1487	48.9133	57.1446	67.7978	82.9088	111.079
2.01625	4.19083	6.53509	9.06559	11.7393	14.7108	17.8909	21.5806	26.0288	30.7144	36.1423	42.1625	49.0277	57.2844	67.9017	83.039	111.108
2.01653	4.19083	6.53887	9.07549	11.7679	14.7353	17.8943	21.6157	26.0357	30.7154	36.154	42.2327	49.0715	57.3241	67.9905	83.1855	111.161
2.01826	4.19083	6.54514	9.09919	11.8051	14.7463	17.8967	21.6259	26.0437	30.7154	36.1825	42.2723	49.1412	57.3416	68.1642	83.2746	111.744
2.02598	4.19083	6.54722	9.10803	11.8256	14.7602	17.9108	21.6562	26.0723	30.7775	36.2435	42.3296	49.1449	57.3699	68.2905	83.2848	111.843
2.02634	4.1975	6.54863	9.10879	11.829	14.7687	17.9159	21.6618	26.1045	30.7828	36.2617	42.3346	49.1465	57.468	68.3769	83.327	112.066
2.02929	4.20525	6.55204	9.11867	11.8467	14.7938	17.9504	21.6782	26.1216	30.804	36.3128	42.346	49.151	57.5062	68.4038	83.5016	112.316
2.02934	4.20525	6.55275	9.12057	11.8502	14.794	17.9535	21.7006	26.1404	30.8387	36.3408	42.4175	49.1604	57.5081	68.4234	83.789	112.492
2.02934	4.20525	6.55348	9.12759	11.8534	14.8302	18.0053	21.7134	26.1838	30.8713	36.3795	42.4403	49.1843	57.5975	68.4614	83.9836	112.907
2.02934	4.21067	6.56473	9.13203	11.8607	14.8739	18.0506	21.7174	26.185	30.8748	36.407	42.4766	49.1971	57.6115	68.5666	84.0849	113.102
2.02934	4.21245	6.56932	9.13203	11.8739	14.8928	18.0657	21.7266	26.2018	30.8887	36.4119	42.5087	49.2987	57.6678	68.5831	84.1576	113.329
2.02934	4.21245	6.58479	9.13576	11.9068	14.9035	18.1009	21.8402	26.2594	30.9065	36.4252	42.5251	49.3392	57.7987	68.5878	84.2346	113.68
2.02934	4.21245	6.5987	9.13765	11.907	14.9227	18.1091	21.8745	26.279	30.9355	36.4499	42.5856	49.4844	57.821	68.5943	84.422	113.893
2.02934	4.21245	6.60308	9.14638	11.9239	14.9334	18.1161	21.8747	26.3355	30.9386	36.4616	42.6275	49.4925	57.8326	68.6879	84.446	113.933
2.02934	4.21275	6.60339	9.14752	11.9292	14.9365	18.121	21.8788	26.3516	30.9578	36.4626	42.6368	49.5144	57.8631	68.6959	84.4622	114.037
2.03915	4.21326	6.60339	9.15552	11.9374	14.9508	18.1291	21.8977	26.3734	30.9824	36.4767	42.6765	49.5285	57.8954	68.7443	84.468	114.364
2.04292	4.2168	6.60339	9.1667	11.9475	14.957	18.1369	21.9148	26.5348	31.0234	36.6779	42.7023	49.5389	57.911	68.8338	84.6541	114.682
2.04545	4.22366	6.60451	9.18368	11.9603	14.9693	18.1526	21.951	26.5428	31.0384	36.7584	42.7128	49.5993	57.9529	68.8403	84.6781	114.682
2.04545	4.22409	6.62171	9.18823	11.9968	14.9814	18.1926	21.9727	26.5463	31.0415	36.7826	42.714	49.6853	58.0124	68.984	84.7067	115.19
2.04545	4.22409	6.62171	9.18823	12.0007	14.9981	18.1937	21.9742	26.6895	31.0425	36.827	42.7771	49.7603	58.1256	69.0577	85.0823	115.338
2.04545	4.22587	6.62171	9.19954	12.0095	15.0133	18.2048	22.0113	26.7338	31.0595	36.9109	42.9646	49.777	58.1391	69.0734	85.5646	115.439
2.04999	4.22909	6.62628	9.20694	12.0153	15.0145	18.2417	22.0198	26.7439	31.0851	36.9141	43.001	49.9661	58.1584	69.1186	85.7355	116.128
2.05562	4.23396	6.63359	9.22441	12.0183	15.0466	18.2435	22.0237	26.7621	31.1008	36.9346	43.0101	49.9861	58.2967	69.3378	85.9294	116.212
2.05588	4.23396	6.63729	9.23395	12.0355	15.0472	18.2475	22.0262	26.7799	31.1119	36.9804	43.0165	50.0315	58.3337	69.3485	86.0178	116.859
2.06375	4.23396	6.6377	9.23603	12.0385	15.0813	18.2507	22.0302	26.8005	31.1481	36.9837	43.0327	50.0497	58.345	69.3622	86.0248	117.834
2.06656	4.23423	6.63857	9.24573	12.0416	15.0837	18.2717	22.0566	26.8287	31.1785	36.996	43.0664	50.0684	58.3497	69.514	86.1743	117.848
2.07706	4.23863	6.64345	9.26372	12.0466	15.0842	18.2862	22.1102	26.8533	31.259	37.0582	43.0777	50.0932	58.3702	69.7188	86.24	118.331
2.07716	4.24588	6.64909	9.27038	12.0686	15.0881	18.2922	22.1397	26.8648	31.2607	37.0619	43.1135	50.0932	58.4919	69.7818	86.3523	118.626
2.079	4.26045	6.64909	9.27488	12.1054	15.0916	18.3104	22.1456	26.8728	31.2878	37.0655	43.3027	50.119	58.5005	69.8495	86.4013	118.721
2.07903	4.26663	6.65179	9.2757	12.1099	15.0996	18.3118	22.1607	26.8731	31.32	37.0801	43.3124	50.2532	58.5559	70.0123	86.6977	119.113
2.07907	4.26756	6.6558	9.27925	12.1137	15.1102	18.3336	22.1631	26.9055	31.3244	37.1563	43.3523	50.264	58.5817	70.1384	86.7008	119.158
2.08572	4.27238	6.66363	9.28021	12.1175	15.1491	18.337	22.219	26.9189	31.3355	37.159	43.3876	50.43	58.5916	70.1989	86.7319	119.877
2.08817	4.2855	6.67557	9.28658	12.1187	15.1642	18.3453	22.2535	26.9425	31.3854	37.1675	43.4131	50.4402	58.6122	70.2557	87.2856	119.921
2.08817	4.29373	6.67821	9.28666	12.1199	15.1656	18.3705	22.2594	26.9447	31.3917	37.1789	43.4382	50.4438	58.6685	70.351	87.2888	120.637
2.08817	4.29784	6.67887	9.29645	12.1399	15.1736	18.3765	22.2598	26.9459	31.4865	37.1861	43.505	50.4516	58.9064	70.3664	87.7213	120.756
2.08817	4.30252	6.68235	9.30281	12.15	15.178	18.4374	22.2713	26.9638	31.5154	37.2261	43.5092	50.4853	58.9378	70.4246	87.763	120.783
2.0933	4.30488	6.68498	9.31117	12.1543	15.1802	18.4624	22.2847	26.9863	31.58	37.2635	43.5384	50.5613	58.959	70.5736	87.7896	120.834
2.09352	4.31441	6.68542	9.31588	12.1997	15.1802	18.4718	22.2966	27.0042	31.5864	37.2773	43.6426	50.6379	59.0671	70.6257	87.8972	121.68
2.10263	4.32011	6.68542	9.31927	12.2007	15.1817	18.4947	22.3478	27.0215	31.596	37.2806	43.6808	50.7246	59.1107	70.6298	88.36	121.691
2.10263	4.32321	6.68823	9.32535	12.2009	15.1882	18.5374	22.3631	27.029	31.5984	37.479	43.6844	50.7605	59.2228	70.6443	88.6382	122.065
2.10263	4.32459	6.6896	9.33912	12.2149	15.1942	18.5536	22.4416	27.03	31.6353	37.5622	43.7556	50.7817	59.2309	70.6602	88.646	123.54
2.10263	4.32867	6.69028	9.34674	12.2174	15.1978	18.5754	22.4526	27.0515	31.6543	37.6552	43.7805	50.817	59.2672	70.7386	88.834	124.894
2.10263	4.33195	6.69447	9.36451	12.2381	15.2136	18.5939	22.4603	27.0703	31.7194	37.7285	43.7805	50.9176	59.3918	70.8652	88.9349	125.857
2.10263	4.33195	6.69447	9.37097	12.2405	15.2339	18.5991	22.4647	27.0748	31.7912	37.7319	43.8109	50.9222	59.4758	70.8771	89.2347	126.985
2.10263	4.33195	6.7006	9.40323	12.2405	15.2419	18.6214	22.4917	27.0983	31.8493	37.7347	43.8109	50.9524	59.5731	70.8788	89.373	127.962
2.10263	4.33613	6.70186	9.40323	12.2526	15.2573	18.6382	22.4928	27.1038	31.8782	37.8329	43.8385	51.0002	59.6279	70.9122	89.413	129.006
2.10263	4.34019	6.71705	9.41246	12.2532	15.2657	18.6965	22.5024	27.1087	31.8969	37.8473	43.8594	51.0222	59.8332	70.9138	89.6096	130.913
2.10263	4.35129	6.72156	9.41467	12.2943	15.2657	18.7049	22.5616	27.1262	31.9164	37.8558	43.9218	51.0382	59.8473	71.1621	89.7564	131.781
2.10263	4.3533	6.72156	9.41588	12.2962	15.2668	18.7319	22.5817	27.2005	31.9706	37.8603	43.9524	51.0405	59.8959	71.1739	89.8131	132.086
2.10263	4.35384	6.72156	9.41932	12.3071	15.2838	18.7419	22.5895	27.2012	31.9986	37.8609	43.994	51.1615	59.9034	71.1807	89.8916	134.672
2.10475	4.35384	6.72203	9.42764	12.309	15.2901	18.771	22.6647	27.202	32.0243	37.9112	43.9948	51.2411	59.9158	71.2021	89.9051	136.45
2.10633	4.35417	6.73848	9.47786	12.3212	15.2994	18.7831	22.7167	27.2109	32.1	37.9495	44.0005	51.2792	59.9429	71.2984	89.9431	137.061
2.1106	4.35433	6.73927	9.47815	12.3235	15.2994	18.8307	22.774	27.2221	32.1167	37.9495	44.0095	51.2945	60.0237	71.3934	89.9667	137.732
2.11188	4.36079	6.7476	9.47975	12.3319	15.3014	18.8462	22.8006	27.282	32.1339	37.962	44.057	51.3086	60.1119	71.4138	90.0105	139.587
2.11698	4.36746	6.74988	9.4841	12.3321	15.3026	18.8551	22.8178	27.3268	32.1395	37.9925	44.1844	51.3649	60.2436	71.4647	90.075	139.788
2.11698	4.37473	6.75121	9.49407	12.3342	15.3172	18.8593	22.8337	27.3341	32.1518	37.9974	44.2034	51.3882	60.2869	71.5896	90.244	139.993
2.11698	4.37847	6.77093	9.49935	12.3502	15.3512	18.9001	22.918	27.3346	32.1748	38.0181	44.2586	51.3947	60.3463	71.6636	90.3013	140.25
2.11698	4.37886	6.77093	9.49935	12.3506	15.3563	18.921	22.9698	27.3825	32.1753	38.0491	44.2691	51.4319	60.3652	71.6741	90.3676
2.11698	4.38296	6.79309	9.49935	12.3789	15.3572	18.9508	22.9831	27.3826	32.2308	38.0552	44.2894	51.443	60.5741	71.6915	90.3861
2.11698	4.3954	6.80662	9.50703	12.387	15.3749	18.9849	22.9873	27.41	32.2843	38.0641	44.303	51.4624	60.5936	71.7016	90.8836
2.11698	4.39901	6.80682	9.5089	12.393	15.3809	18.9923	23.0397	27.4182	32.2899	38.069	44.3164	51.4708	60.6056	71.7046	90.9858
2.11698	4.42404	6.80746	9.51008	12.4048	15.3843	19.0274	23.1446	27.427	32.3397	38.0778	44.3652	51.483	60.6686	71.7624	91.3618
2.11698	4.42561	6.82126	9.52935	12.4369	15.3921	19.0456	23.1497	27.427	32.3882	38.0969	44.3741	51.518	60.6702	71.8332	91.608
2.11698	4.42969	6.82439	9.53542	12.442	15.4118	19.0655	23.1603	27.4279	32.4471	38.1287	44.5802	51.5675	60.6969	72.0144	91.7217
2.11739	4.42969	6.83769	9.57474	12.4515	15.4177	19.0666	23.1632	27.435	32.4579	38.1564	44.6438	51.5991	60.8887	72.3888	91.7877
2.11922	4.43324	6.83843	9.57474	12.4589	15.4472	19.0788	23.1718	27.4633	32.4796	38.1644	44.6916	51.7158	61.0124	72.4503	91.9037
2.11931	4.43512	6.84211	9.58503	12.4612	15.4478	19.081	23.2066	27.5072	32.5086	38.1689	44.7345	51.7581	61.0913	72.5342	92.1515
2.11931	4.43652	6.85517	9.59547	12.5024	15.455	19.095	23.223	27.5196	32.5328	38.1826	44.7431	51.8496	61.121	72.5342	92.2747
2.11931	4.43652	6.8583	9.59669	12.505	15.4581	19.102	23.223	27.5196	32.5784	38.284	44.7492	51.8655	61.1839	72.6106	92.6219
2.12135	4.43652	6.87855	9.60081	12.5236	15.5351	19.121	23.2324	27.5212	32.5836	38.2933	44.7492	51.9346	61.4998	72.7114	92.9078
2.12699	4.43652	6.87855	9.61206	12.5255	15.541	19.1463	23.2371	27.6733	32.5953	38.3256	44.7774	51.958	61.5512	72.8059	93.0173
2.13378	4.43652	6.89502	9.61496	12.5339	15.5537	19.1495	23.2659	27.6753	32.6118	38.3567	44.9032	52.0206	61.5726	72.9036	93.1067
2.13378	4.43652	6.90089	9.61928	12.5508	15.5544	19.2168	23.2751	27.7064	32.6174	38.4422	44.9065	52.0512	61.6169	73.1159	93.9488
2.13722	4.43652	6.91216	9.6255	12.5695	15.5941	19.224	23.2972	27.7279	32.633	38.4671	44.9328	52.1248	61.8832	73.1391	94.1883
2.14061	4.43652	6.92147	9.62601	12.57	15.5976	19.2263	23.3019	27.7388	32.6944	38.5394	44.946	52.1637	61.9003	73.3508	94.3014
2.14252	4.4372	6.92316	9.62601	12.5709	15.6179	19.2682	23.3063	27.7934	32.7013	38.5849	44.9598	52.2229	61.9632	73.3615	94.574
2.14314	4.45087	6.92321	9.65477	12.572	15.6289	19.2913	23.3374	27.799	32.7274	38.6179	44.9807	52.2699	62.0181	73.3694	94.7921
2.14647	4.45474	6.92538	9.65927	12.5752	15.6349	19.3023	23.3441	27.8521	32.7387	38.7249	44.984	52.2838	62.0469	73.6877	95.1899
2.1534	4.46306	6.93006	9.67383	12.5893	15.6445	19.3079	23.3828	27.8598	32.7638	38.747	44.9982	52.3089	62.0668	73.7986	95.3959
2.15389	4.47173	6.93006	9.68654	12.5917	15.692	19.3168	23.4015	27.888	32.833	38.7747	45.0782	52.3402	62.0781	73.8696	95.7491
2.15423	4.47234	6.93006	9.68744	12.5961	15.7075	19.354	23.4015	27.89	32.8908	38.7799	45.1366	52.381	62.1059	73.8847	95.8598
2.15557	4.48652	6.93443	9.68911	12.6003	15.7103	19.3676	23.4477	27.9314	32.8938	38.7877	45.137	52.3925	62.1804	73.9204	95.9904
2.15953	4.48698	6.93493	9.69809	12.6211	15.7338	19.3788	23.4513	28.0244	32.9033	38.8462	45.1655	52.4295	62.3084	74.084	96.0954
2.1625	4.4873	6.93885	9.70048	12.6364	15.8024	19.3851	23.4602	28.0266	32.9656	38.8524	45.1739	52.5051	62.3788	74.0942	96.301
2.1663	4.49079	6.9431	9.70464	12.6541	15.8433	19.3853	23.4718	28.0278	32.9674	38.8898	45.1916	52.6146	62.3861	74.1331	96.3764
2.16958	4.49089	6.94974	9.71501	12.6681	15.8769	19.3985	23.5442	28.03	33.0532	38.9162	45.1969	52.6351	62.4704	74.1335	96.6193
2.18011	4.50173	6.95085	9.72899	12.6685	15.8769	19.4048	23.5855	28.037	33.0742	38.9202	45.2548	52.6847	62.526	74.2065	97.0636
2.18908	4.50372	6.96928	9.73336	12.6757	15.9069	19.4055	23.5868	28.0644	33.0922	38.9676	45.2551	52.7744	62.5645	74.5485	97.3891
2.18933	4.50388	6.9746	9.73549	12.6776	15.9146	19.4554	23.625	28.0644	33.1252	38.9905	45.2564	52.7868	62.5806	74.9678	97.5056
2.19068	4.50483	6.97593	9.74345	12.6907	15.926	19.4685	23.6264	28.0859	33.128	39.0261	45.324	52.85	62.5993	75.0453	97.569
2.19088	4.50801	6.9923	9.74482	12.6915	15.9502	19.4908	23.6365	28.086	33.1579	39.132	45.3264	52.8575	62.6371	75.1063	97.7094
2.1918	4.51245	7.00395	9.7556	12.7138	15.9648	19.4944	23.6503	28.1032	33.2072	39.1413	45.3827	52.8827	62.6975	75.2445	97.8256
2.19469	4.52438	7.00395	9.77551	12.7215	15.9677	19.5594	23.6877	28.1087	33.2372	39.1568	45.4315	52.9736	62.7264	75.6008	98.5264
2.19625	4.52438	7.01421	9.78513	12.7329	15.9774	19.5879	23.7277	28.1216	33.2518	39.1877	45.5001	53.0268	62.7274	75.6529	98.5371
2.19823	4.52438	7.01583	9.7975	12.7372	15.9852	19.6098	23.7503	28.1222	33.2829	39.1915	45.514	53.099	62.844	75.6953	98.5559
2.19825	4.52643	7.01844	9.79808	12.7444	15.986	19.6145	23.7577	28.1382	33.3064	39.1962	45.6038	53.1019	62.9423	75.7013	99.1058
2.19836	4.53011	7.02295	9.80059	12.7462	15.986	19.6459	23.7664	28.1991	33.3196	39.2247	45.6147	53.1104	62.9731	75.8212	99.2048
2.20103	4.53053	7.0274	9.82221	12.76	15.9961	19.6895	23.7847	28.2021	33.3422	39.2332	45.6602	53.1415	63.0235	75.9262	99.4657
2.20113	4.53576	7.02838	9.82311	12.769	16.0099	19.6937	23.7949	28.2217	33.3536	39.2402	45.6709	53.1619	63.0769	75.9828	99.7141
2.20113	4.53774	7.02906	9.83035	12.7716	16.0131	19.7075	23.8457	28.2382	33.3713	39.3026	45.7052	53.3223	63.1611	76.027	99.7849
2.20113	4.53774	7.03153	9.83452	12.7749	16.0293	19.7096	23.847	28.2579	33.4371	39.3221	45.7311	53.3303	63.1728	76.2914	100.013
2.20113	4.53774	7.04705	9.8379	12.7779	16.0342	19.7121	23.874	28.2954	33.447	39.3758	45.7423	53.3387	63.2322	76.3418	100.019
2.20113	4.53774	7.04859	9.84375	12.7792	16.0398	19.7152	23.9117	28.3528	33.4697	39.3819	45.7549	53.3726	63.304	76.3636	100.063
2.20113	4.53774	7.05082	9.84819	12.7898	16.0564	19.7397	23.9121	28.3558	33.4832	39.3819	45.7662	53.39	63.3181	76.4655	100.69
2.20498	4.53774	7.05518	9.85605	12.7943	16.0641	19.7474	23.9126	28.3849	33.4962	39.4342	45.7749	53.3923	63.3537	76.6221	100.988
2.20963	4.54334	7.0711	9.86451	12.7969	16.0716	19.7517	23.9128	28.4688	33.542	39.5041	45.8103	53.3998	63.3557	76.6427	101.139
2.21484	4.5438	7.07832	9.8714	12.7992	16.0867	19.7566	23.9167	28.4872	33.5672	39.5722	45.9412	53.4165	63.3986	76.7296	101.205
2.21484	4.54635	7.08052	9.87526	12.7992	16.0944	19.7786	23.9332	28.4872	33.6069	39.6119	45.9741	53.4335	63.4235	76.9719	101.264
2.21484	4.55354	7.08306	9.87902	12.7992	16.0952	19.7816	23.9332	28.5734	33.6718	39.6394	46.0265	53.493	63.4418	77.0886	101.31
2.21484	4.56092	7.08479	9.88534	12.8023	16.1239	19.8353	23.9509	28.5734	33.7292	39.6486	46.0393	53.5586	63.443	77.1044	101.467
2.21548	4.56161	7.10301	9.89285	12.8182	16.1243	19.8763	23.9529	28.5988	33.775	39.6656	46.0393	53.5677	63.4849	77.1106	101.631
2.21643	4.56576	7.10731	9.91944	12.8394	16.1261	19.8788	23.9825	28.633	33.7875	39.6891	46.0873	53.6246	63.4939	77.1122	101.694
2.2186	4.57372	7.10731	9.92036	12.8502	16.1423	19.9078	24.0531	28.6668	33.8466	39.6945	46.1002	53.6507	63.5608	77.1279	101.835
2.2186	4.57511	7.126	9.92498	12.8612	16.145	19.9101	24.0759	28.6707	33.8547	39.6963	46.1247	53.6856	63.5942	77.2875	101.938
2.2186	4.57761	7.13144	9.92861	12.8722	16.1487	19.923	24.0833	28.6992	33.9431	39.7533	46.1673	53.7142	63.6261	77.2907	102.048
2.2186	4.58086	7.13672	9.93141	12.8783	16.15	19.923	24.1053	28.7114	33.9761	39.7744	46.1795	53.7325	63.6527	77.4042	102.096
2.21922	4.58467	7.14631	9.93427	12.8818	16.1535	19.9243	24.1219	28.7617	33.993	39.8414	46.2355	53.7691	63.7022	77.4629	102.129
2.22453	4.58517	7.15367	9.94386	12.8959	16.1787	19.9717	24.1231	28.7688	34.0375	39.8669	46.2368	53.8039	63.8237	77.4848	102.205
2.22519	4.59299	7.15367	9.94709	12.9123	16.2033	19.9742	24.1786	28.7967	34.0514	39.8679	46.2898	53.8484	63.8297	77.518	102.286
2.22753	4.60237	7.15367	9.9567	12.9193	16.2099	19.995	24.187	28.8002	34.1015	39.9325	46.329	53.9614	63.856	78.0583	102.469
2.22784	4.60449	7.16647	9.96604	12.933	16.259	20.0185	24.1927	28.8032	34.1219	39.956	46.3448	54.121	63.9886	78.099	102.621
2.22847	4.60825	7.1748	9.96604	12.9413	16.2659	20.0506	24.2087	28.8253	34.1414	39.9984	46.429	54.121	64.0454	78.2179	102.681
2.22847	4.6086	7.1748	9.97136	12.9446	16.2887	20.0774	24.2121	28.8351	34.1681	40.0112	46.4881	54.1546	64.1488	78.2547	102.804
2.22847	4.60888	7.17901	9.97136	12.9685	16.2943	20.1777	24.2478	28.8586	34.2527	40.1193	46.4967	54.1608	64.1607	78.3123	102.9
2.23061	4.62116	7.18745	9.97753	12.9799	16.3052	20.2139	24.2744	28.877	34.2787	40.1744	46.5397	54.3979	64.1932	78.3232	102.986
2.23176	4.63038	7.1877	9.98419	12.9828	16.3523	20.2315	24.2849	28.9452	34.2852	40.2045	46.5534	54.4009	64.2272	78.4622	103.138
2.23242	4.63074	7.20429	9.9847	12.9837	16.3581	20.2317	24.3091	28.9513	34.3166	40.2173	46.6262	54.4038	64.2647	78.5101	103.148
2.23415	4.6339	7.20718	9.99335	12.9917	16.3629	20.2486	24.3162	28.9688	34.3312	40.2333	46.6625	54.4268	64.3327	78.5135	103.248
2.23893	4.6339	7.21045	9.99335	12.9941	16.385	20.249	24.3435	28.9888	34.3351	40.2407	46.7222	54.4579	64.383	78.643	103.41
2.24469	4.63525	7.21283	9.99335	12.9941	16.422	20.2503	24.3521	29.0391	34.344	40.2906	46.7979	54.467	64.4676	78.695	103.425
2.24616	4.64329	7.2227	9.99909	12.9949	16.4266	20.2525	24.3856	29.0568	34.4197	40.3006	46.8613	54.4857	64.4991	78.7262	103.664
2.24777	4.64329	7.22977	10.0027	13.0034	16.4294	20.2531	24.4018	29.061	34.4566	40.326	46.8859	54.5774	64.6107	78.7627	104.015
2.24841	4.66558	7.2649	10.0206	13.012	16.4386	20.2579	24.4129	29.0682	34.5067	40.3931	46.9169	54.5785	64.7208	78.9359	104.149
2.25088	4.6693	7.2876	10.0417	13.0244	16.4394	20.272	24.4162	29.0722	34.5409	40.4029	46.9311	54.6998	64.7694	79.137	104.272
2.25232	4.6693	7.29528	10.0451	13.0314	16.4515	20.2832	24.4365	29.1033	34.5593	40.5232	46.9378	54.7944	64.8054	79.2517	104.51
2.25676	4.67247	7.29528	10.0519	13.0523	16.4544	20.3066	24.4562	29.1499	34.5744	40.551	46.963	54.8044	65.0768	79.8759	104.637
2.25875	4.67841	7.29949	10.0538	13.0638	16.4629	20.3287	24.4914	29.1752	34.6302	40.5995	46.9672	54.843	65.1447	79.8805	104.948
2.2619	4.68092	7.30433	10.0727	13.0801	16.4662	20.3498	24.4956	29.183	34.6302	40.6241	46.9916	54.8524	65.1717	80.1847	105.039
2.26887	4.68122	7.30824	10.0892	13.1066	16.5291	20.3768	24.5219	29.1917	34.6503	40.6382	47.0182	54.8717	65.2153	80.2967	105.32
2.26887	4.68225	7.31689	10.0898	13.1396	16.5322	20.3815	24.5292	29.342	34.6734	40.6532	47.0561	54.8877	65.2682	80.409	105.586
2.26887	4.68225	7.31689	10.0898	13.1483	16.5351	20.385	24.5522	29.3513	34.7001	40.6956	47.0976	55.031	65.3707	80.5012	105.715
2.26887	4.68289	7.32419	10.0928	13.1655	16.5583	20.3917	24.5683	29.3585	34.7062	40.7425	47.0992	55.1739	65.4717	80.5268	106.23
2.26887	4.68755	7.3255	10.1135	13.1762	16.5762	20.3941	24.6057	29.4154	34.7133	40.7439	47.1922	55.2649	65.5414	80.5464	106.262
2.26887	4.6912	7.32894	10.1168	13.1907	16.5762	20.3946	24.6322	29.4198	34.7368	40.8123	47.2573	55.266	65.5883	80.9394	106.543
2.26887	4.69783	7.34168	10.1168	13.2251	16.5768	20.4184	24.6354	29.4203	34.7652	40.8367	47.2609	55.301	65.6481	80.9834	107.092
2.26887	4.70161	7.34168	10.1168	13.2297	16.5885	20.4304	24.6507	29.4213	34.7864	40.8738	47.266	55.3817	65.7881	81.0187	107.27
2.26887	4.70161	7.35681	10.127	13.2305	16.6379	20.4317	24.6697	29.4555	34.789	40.9104	47.3281	55.5393	66.0178	81.1337	107.307
2.26887	4.70161	7.36328	10.1377	13.2321	16.6487	20.4453	24.688	29.4647	34.7933	40.9517	47.3761	55.591	66.0342	81.2035	107.437
2.26887	4.70161	7.36444	10.1654	13.249	16.6493	20.4495	24.7364	29.5118	34.8158	40.9922	47.3828	55.7987	66.109	81.4208	107.683
2.26887	4.70252	7.37449	10.1735	13.2526	16.6547	20.4628	24.7517	29.58	34.8173	41.1256	47.3893	55.8264	66.1553	81.4808	107.801
2.26887	4.70721	7.38281	10.1735	13.2526	16.6748	20.4746	24.7578	29.5824	34.8247	41.147	47.3914	55.8779	66.1673	81.5105	107.82
2.26887	4.71289	7.38281	10.1811	13.2526	16.7019	20.522	24.7861	29.5961	34.8594	41.1713	47.394	55.9288	66.1699	81.5977	107.963
2.27184	4.71904	7.38691	10.1952	13.2583	16.7078	20.5455	24.8177	29.6035	34.9253	41.1867	47.4081	56.037	66.1718	81.6809	108.347
2.2812	4.71941	7.38725	10.1993	13.28	16.7416	20.5558	24.8883	29.6431	34.9773	41.2088	47.4508	56.1112	66.2614	81.9463	108.623
2.28688	4.71941	7.38975	10.2025	13.3047	16.7512	20.5559	24.8993	29.651	35.0198	41.2273	47.6353	56.118	66.3924	82.0438	108.627
2.28688	4.72731	7.39995	10.2062	13.3096	16.7523	20.5602	24.9077	29.7315	35.0284	41.2477	47.6813	56.1315	66.397	82.3091	108.879
2.28688	4.72839	7.40329	10.212	13.3235	16.7711	20.5661	24.9568	29.7814	35.0524	41.2477	47.803	56.1682	66.4822	82.3094	109.463
2.28688	4.72923	7.40674	10.2322	13.356	16.8102	20.5939	24.9742	29.8184	35.0814	41.2594	47.8233	56.3096	66.5255	82.4535	109.507
2.28688	4.73181	7.40994	10.2419	13.3615	16.8102	20.6371	25.0121	29.8261	35.1974	41.2854	47.9018	56.3248	66.5623	82.5383	109.626
2.28688	4.73371	7.44001	10.2543	13.3905	16.8444	20.6382	25.042	29.8271	35.1991	41.31	47.9199	56.336	66.7067	82.5717	109.734
2.28688	4.73371	7.4408	10.2565	13.3968	16.8628	20.6733	25.0605	29.8545	35.2353	41.3371	47.9472	56.3877	66.7503	82.7109	110.071
2.28688	4.73371	7.44246	10.2583	13.3968	16.8677	20.6905	25.1156	29.8746	35.2602	41.3376	47.9604	56.5234	66.8485	82.7256	111.013
2.28688	4.73672	7.44554	10.2623	13.3978	16.868	20.726	25.1288	29.9028	35.2769	41.3818	47.9655	56.57	66.8728	82.7256	111.392
2.28688	4.73893	7.44871	10.2679	13.4003	16.8938	20.7336	25.166	29.91	35.3357	41.4491	47.9674	56.6256	67.1148	82.957	111.498
2.28966	4.74505	7.44907	10.2687	13.4273	16.909	20.7358	25.2435	29.9181	35.4921	41.4505	47.9851	56.6614	67.1227	83.1214	111.599
2.29213	4.75286	7.45331	10.2782	13.4282	16.9144	20.7479	25.2555	29.9325	35.5055	41.4527	48.0084	56.694	67.1691	83.2721	111.744
2.29215	4.75709	7.45773	10.2782	13.4301	16.9243	20.765	25.2848	30.0396	35.5643	41.5447	48.0236	56.8049	67.2186	83.3891	111.886
2.29497	4.76121	7.45792	10.3058	13.4544	16.9305	20.7901	25.313	30.0857	35.5688	41.5524	48.0584	56.8375	67.2525	83.4341	111.939
2.29527	4.76376	7.46967	10.307	13.4605	16.9318	20.7902	25.319	30.0879	35.5743	41.5673	48.0948	56.9009	67.2628	83.4457	112.276
2.29669	4.76482	7.4725	10.3153	13.4884	16.9506	20.8018	25.3268	30.0935	35.6097	41.5898	48.1257	56.9158	67.3065	83.6929	112.458
2.29676	4.77017	7.48465	10.323	13.4884	16.9715	20.8063	25.3536	30.105	35.62	41.6028	48.137	56.9243	67.356	83.7026	112.874
2.2971	4.77506	7.48465	10.3257	13.4952	16.9781	20.8178	25.3594	30.1088	35.6301	41.6255	48.1441	56.9456	67.5284	83.8866	113.63
2.29758	4.77828	7.48465	10.3262	13.4998	17.0021	20.8614	25.3691	30.1141	35.6556	41.6335	48.1656	56.9654	67.64	83.9483	114.18
2.2976	4.79057	7.49128	10.3294	13.5074	17.0161	20.8759	25.3718	30.1251	35.659	41.6722	48.2023	57.02	67.7044	83.9887	114.436
2.30233	4.8022	7.49576	10.3303	13.5089	17.0307	20.8831	25.4085	30.1452	35.6859	41.6875	48.2645	57.0985	67.8076	84.0045	114.807
2.30981	4.80548	7.50726	10.3476	13.5109	17.0445	20.9019	25.4085	30.1653	35.7438	41.7171	48.2879	57.1812	67.917	84.0867	115.031
2.31585	4.80762	7.50767	10.3557	13.515	17.057	20.918	25.5054	30.1871	35.7827	41.7727	48.3227	57.2408	67.9277	84.3355	115.485
2.32164	4.81349	7.50856	10.3661	13.515	17.0588	20.9411	25.5434	30.2205	35.7914	41.8164	48.3247	57.2502	67.9348	84.3503	115.546
2.32164	4.81415	7.51638	10.3688	13.5312	17.0641	20.9541	25.5618	30.2495	35.7954	41.8945	48.3479	57.4581	67.9906	84.4589	115.731
2.32164	4.8162	7.51949	10.374	13.5407	17.0996	20.9634	25.5681	30.2628	35.8056	41.9083	48.4748	57.4812	68.1897	84.6437	115.936
2.32164	4.82047	7.52143	10.3827	13.5835	17.1208	20.9669	25.5771	30.2735	35.8082	41.9386	48.4773	57.5003	68.3242	84.8827	116.166
2.32164	4.83152	7.52869	10.3937	13.5991	17.1224	20.988	25.6078	30.28	35.812	41.9408	48.4812	57.5128	68.3414	85.0046	116.446
2.32443	4.83195	7.52902	10.4302	13.6244	17.1367	21.0104	25.6102	30.2855	35.836	41.9493	48.5054	57.5933	68.3742	85.0929	117.014
2.32555	4.83498	7.5457	10.4322	13.6443	17.1451	21.0263	25.6112	30.3824	35.9475	41.9667	48.5246	57.6035	68.4424	85.1189	119.386
2.32898	4.84403	7.54577	10.4409	13.6448	17.1658	21.0278	25.6233	30.3854	35.9886	42.002	48.5273	57.6163	68.5894	85.2767	119.502
2.32911	4.84748	7.55088	10.4445	13.6488	17.2211	21.0622	25.7871	30.3904	36.0088	42.095	48.5647	57.6237	68.8099	85.6028	121.574
2.33364	4.85373	7.55892	10.4503	13.6842	17.2494	21.0767	25.7929	30.4172	36.0088	42.1539	48.6937	57.6649	69.0085	85.8342	122.351
2.33387	4.86294	7.57013	10.4539	13.6877	17.2494	21.0924	25.8023	30.4209	36.0105	42.1928	48.7148	57.777	69.2333	86.1945	123.205
2.33465	4.86673	7.57197	10.4554	13.6975	17.2632	21.154	25.841	30.4269	36.0685	42.1977	48.7645	57.8153	69.2486	86.2003	123.328
2.33465	4.87335	7.58113	10.4651	13.723	17.2705	21.1726	25.8504	30.5836	36.0731	42.2035	48.8389	57.821	69.3465	86.3119	125.205
2.33465	4.87734	7.58113	10.4668	13.7284	17.2735	21.1821	25.8598	30.5989	36.092	42.2092	48.8676	57.8697	69.4839	86.5054	126.016
2.33465	4.88482	7.58891	10.468	13.731	17.2827	21.1869	25.8691	30.6476	36.1102	42.2456	48.8746	57.8781	69.5188	86.5145	128.523
2.3392	4.88482	7.58936	10.4753	13.757	17.2827	21.1998	25.8869	30.6937	36.1892	42.2572	48.881	57.9471	69.6197	86.5362	128.972
2.33923	4.91612	7.61783	10.4942	13.7593	17.287	21.2155	25.8969	30.7012	36.2017	42.2572	48.8885	57.9671	69.7942	86.861	130.103
2.34007	4.92051	7.61976	10.5131	13.7611	17.2915	21.2887	25.9186	30.7068	36.2301	42.2579	48.898	57.9785	69.8425	86.9422	131.181
2.34007	4.92188	7.62887	10.5131	13.7772	17.3226	21.3081	25.9754	30.7084	36.302	42.2589	48.8984	58.0035	69.895	86.9881	132.562
2.34007	4.92188	7.63565	10.5218	13.7772	17.3335	21.3081	26.0389	30.7154	36.3128	42.2888	48.9009	58.0583	69.9205	87.3227	133.422
2.34007	4.92728	7.6408	10.5657	13.7807	17.3771	21.3322	26.0421	30.7253	36.3648	42.3288	48.9162	58.1302	70.0157	87.8682	133.656
2.34166	4.92802	7.65147	10.5677	13.801	17.382	21.3365	26.0488	30.7348	36.4324	42.331	48.9787	58.292	70.0404	87.9419	133.929
2.34332	4.93997	7.65645	10.5771	13.8292	17.3893	21.3406	26.0859	30.7391	36.4368	42.3396	49.0565	58.3325	70.1086	88.008
2.34534	4.94051	7.65664	10.5833	13.8352	17.4075	21.3511	26.1045	30.7644	36.4373	42.3396	49.0764	58.3761	70.1194	88.117
2.34645	4.94828	7.65804	10.5838	13.8388	17.4375	21.3826	26.1088	30.7671	36.4767	42.3632	49.0951	58.3793	70.1384	88.3425
2.34678	4.95254	7.66001	10.5849	13.8558	17.464	21.3861	26.1115	30.7696	36.5494	42.3982	49.0995	58.3803	70.2036	88.5616
2.34859	4.95926	7.66455	10.5894	13.871	17.4673	21.3863	26.226	30.8113	36.5529	42.3996	49.219	58.4068	70.2036	89.2327
2.35261	4.96593	7.67098	10.5935	13.8748	17.4882	21.3918	26.2297	30.8207	36.5588	42.4079	49.3545	58.4855	70.3678	89.411
2.35318	4.96713	7.70145	10.5966	13.8798	17.4882	21.3955	26.2453	30.8334	36.5707	42.4794	49.3987	58.5212	70.5221	89.478
2.35318	4.97236	7.70395	10.5966	13.907	17.5004	21.4011	26.2466	30.8404	36.5845	42.4952	49.451	58.5765	70.7553	89.6501
2.35318	4.97694	7.70395	10.602	13.9128	17.5036	21.4141	26.2642	30.9071	36.6049	42.5002	49.4918	58.5816	70.8241	89.892
[truncated: 2,179 more rows]
