# Supplementary material for: Long-term intravital imaging of the multicolor-coded tumor microenvironment during combination immunotherapy
Source: eLife. 2016 Nov 18;5:e14756. doi: 10.7554/eLife.14756 (PMC5173323; doi:10.7554/eLife.14756)
Supplement: Figure 3—source data 5. — DOI: http://dx.doi.org/10.7554/eLife.14756.020 [file elife-14756-fig3-data5.xls]

## Sheet: displacement（um）
0	0	0	0	0	0	0	0	0	0	0	0	0	0	0	0	0	0	0	0
0	0	0	0	0	0	0	0	0	0	0	0	0	0	0	0	0	0	0	0
0	0	0	0	0	0	0	0	0	0	0	0	0	0	0	0	0	0	0	0
0	0	0	0	0	0	0	0	0	0	0	0	0	0	0	0	0	0	0	0
0	0	0	0	0	0	0	0	0	0	0	0	0	0	0	0	0	0	0	0
0	0	0	0	0	0	0	0	0	0	0	0	0	0	0	0	0	0	0	0
0	0	0	0	0	0	0	0	0	0	0	0	0	0	0	0	0	0	0	0
0	0	0	0	0	0	0	0	0	0	0	0	0	0	0	0	0	0	0.0800336	0
0	0	0	0	0	0	0	0	0	0	0	0	0	0	0	0	0	0	0.180181	0
0	0	0	0	0	0	0	0	0	0	0	0	0	0	0	0	0	0	0.22746	0.338525
0	0	0	0	0	0	0	0	0	0	0	0	0	0	0	0	0	0	0.241955	0.367496
0	0	0	0	0	0	0	0	0	0	0	0	0	0	0	0	0	0	0.246094	0.408641
0	0	0	0	0	0	0	0	0	0	0	0	0	0	0	0	0	0	0.246094	0.53739
0	0	0	0	0	0	0	0	0	0	0	0	0	0	0	0	0	0	0.246094	0.715499
0	0	0	0	0	0	0	0	0	0	0	0	0	0	0	0	0	0	0.246094	0.939383
0	0	0	0	0	0	0	0	0	0	0	0	0	0	0	0	0	0	0.246094	0.992036
0	0	0	0	0	0	0	0	0	0	0	0	0	0	0	0	0	0	0.246094	1.01865
0	0	0	0	0	0	0	0	0	0	0	0	0	0	0	0	0	0	0.246094	1.06042
0	0	0	0	0	0	0	0	0	0	0	0	0	0	0	0	0	0	0.246094	1.094
0	0	0	0	0	0	0	0	0	0	0	0	0	0	0	0	0	0	0.246094	1.14594
0	0	0	0	0	0	0	0	0	0	0	0	0	0	0	0	0	0	0.246094	1.23047
0	0	0	0	0	0	0	0	0	0	0	0	0	0	0	0	0.00839699	0.0786348	0.246094	1.23047
0	0	0	0	0	0	0	0	0	0	0	0	0	0	0	0	0.0695338	0.0896572	0.246094	1.23047
0	0	0	0	0	0	0	0	0	0	0	0	0	0	0	0	0.0801742	0.100839	0.246094	1.23047
0	0	0	0	0	0	0	0	0	0	0	0	0	0	0	0	0.090932	0.101885	0.246094	1.23047
0	0	0	0	0	0	0	0	0	0	0	0	0	0	0	0	0.102806	0.15338	0.246094	1.23047
0	0	0	0	0	0	0	0	0	0	0	0	0	0	0	0	0.104609	0.214117	0.246094	1.23047
0	0	0	0	0	0	0	0	0	0	0	0	0	0	0	0	0.129133	0.214975	0.246094	1.23047
0	0	0	0	0	0	0	0	0	0	0	0	0	0	0	0	0.130072	0.22746	0.246094	1.23047
0	0	0	0	0	0	0	0	0	0	0	0	0	0	0	0	0.156906	0.240125	0.246094	1.23047
0	0	0	0	0	0	0	0	0	0	0	0	0	0	0	0	0.168412	0.241955	0.246094	1.23047
0	0	0	0	0	0	0	0	0	0	0	0	0	0	0	0	0.17864	0.246094	0.246094	1.23047
0	0	0	0	0	0	0	0	0	0	0	0	0	0	0	0	0.190347	0.246094	0.246094	1.23047
0	0	0	0	0	0	0	0	0	0	0	0	0	0	0	0	0.200296	0.246094	0.246094	1.23047
0	0	0	0	0	0	0	0	0	0	0	0	0	0	0	0	0.215484	0.246094	0.260248	1.23047
0	0	0	0	0	0	0	0	0	0	0	0	0	0	0	0.0455002	0.222339	0.246094	0.285811	1.23047
0	0	0	0	0	0	0	0	0	0	0	0	0	0	0	0.0530475	0.22746	0.246094	0.313454	1.23047
0	0	0	0	0	0	0	0	0	0	0	0	0	0	0	0.069451	0.235807	0.246094	0.340692	1.23047
0	0	0	0	0	0	0	0	0	0	0	0	0	0	0	0.0809167	0.240058	0.246094	0.348029	1.23852
0	0	0	0	0	0	0	0	0	0	0	0	0	0	0	0.082949	0.243936	0.246094	0.348029	1.32795
0	0	0	0	0	0	0	0	0	0	0	0	0	0	0	0.0871923	0.246094	0.246094	0.348029	1.49489
0	0	0	0	0	0	0	0	0	0	0	0	0	0	0	0.112162	0.246094	0.246094	0.348029	1.74015
0	0	0	0	0	0	0	0	0	0	0	0	0	0	0	0.120886	0.246094	0.246094	0.348029	1.74015
0	0	0	0	0	0	0	0	0	0	0	0	0	0	0	0.13042	0.246094	0.246094	0.348029	1.74015
0	0	0	0	0	0	0	0	0	0	0	0	0	0	0	0.136845	0.246094	0.246094	0.348029	1.74015
0	0	0	0	0	0	0	0	0	0	0	0	0	0	0	0.163794	0.246094	0.246094	0.348029	1.79907
0	0	0	0	0	0	0	0	0	0	0	0	0	0	0	0.167902	0.246094	0.246094	0.348029	2.01631
0	0	0	0	0	0	0	0	0	0	0	0	0	0	0	0.170474	0.246094	0.246094	0.357903	2.02647
0	0	0	0	0	0	0	0	0	0	0	0	0	0	0	0.172025	0.246094	0.246094	0.369092	2.08552
0	0	0	0	0	0	0	0	0	0	0	0	0	0	0	0.175699	0.246094	0.246094	0.377378	2.14686
0	0	0	0	0	0	0	0	0	0	0	0	0	0	0	0.1801	0.246094	0.246094	0.397093	2.19565
0	0	0	0	0	0	0	0	0	0	0	0	0	0	0	0.192188	0.246094	0.246094	0.436568	2.46094
0	0	0	0	0	0	0	0	0	0	0	0	0	0	0	0.194224	0.246094	0.246094	0.472307	2.51913
0	0	0	0	0	0	0	0	0	0	0	0	0	0	0	0.197354	0.246094	0.246094	0.474363	2.61094
0	0	0	0	0	0	0	0	0	0	0	0	0	0	0	0.208771	0.246094	0.246094	0.492188	2.72404
0	0	0	0	0	0	0	0	0	0	0	0	0	0	0	0.215796	0.246094	0.246094	0.492188	2.75141
0	0	0	0	0	0	0	0	0	0	0	0	0	0	0	0.224139	0.246094	0.246094	0.492188	2.75141
0	0	0	0	0	0	0	0	0	0	0	0	0	0	0.0678313	0.225034	0.246094	0.246094	0.492188	2.75141
0	0	0	0	0	0	0	0	0	0	0	0	0	0	0.0682512	0.228423	0.246094	0.246094	0.492188	2.75141
0	0	0	0	0	0	0	0	0	0	0	0	0	0	0.069451	0.23175	0.246094	0.246094	0.496537	2.75141
0	0	0	0	0	0	0	0	0	0	0	0	0	0	0.0757238	0.23865	0.246094	0.246094	0.507772	2.75141
0	0	0	0	0	0	0	0	0	0	0	0	0	0	0.0764628	0.239924	0.246094	0.246094	0.508499	2.90401
0	0	0	0	0	0	0	0	0	0	0	0	0	0	0.0766108	0.23993	0.246094	0.246094	0.509845	2.90905
0	0	0	0	0	0	0	0	0	0	0	0	0	0	0.0910655	0.240378	0.246094	0.246094	0.550282	2.94727
0	0	0	0	0	0	0	0	0	0	0	0	0	0	0.0929102	0.243773	0.246094	0.246094	0.550282	3.01231
0	0	0	0	0	0	0	0	0	0	0	0	0	0	0.100217	0.245937	0.246094	0.246094	0.553469	3.40333
0	0	0	0	0	0	0	0	0	0	0	0	0	0.0398281	0.103891	0.246094	0.246094	0.246094	0.559542	3.46004
0	0	0	0	0	0	0	0	0	0	0	0	0	0.0829344	0.109988	0.246094	0.246094	0.246094	0.565773	3.48029
0	0	0	0	0	0	0	0	0	0	0	0	0	0.093855	0.112603	0.246094	0.246094	0.246094	0.56988	3.48029
0	0	0	0	0	0	0	0	0	0	0	0	0.0169166	0.0978008	0.130847	0.246094	0.246094	0.24663	0.575564	3.48029
0	0	0	0	0	0	0	0	0	0	0	0	0.0423717	0.100682	0.133615	0.246094	0.246094	0.25206	0.581826	3.59683
0	0	0	0	0	0	0	0	0	0	0	0.0110585	0.0829344	0.109988	0.138567	0.246094	0.246094	0.253782	0.595893	3.67013
0	0	0	0	0	0	0	0	0	0	0	0.0222184	0.0836673	0.115825	0.147939	0.246094	0.246094	0.25982	0.652769	3.69059
0	0	0	0	0	0	0	0	0	0	0	0.0261094	0.0850115	0.123569	0.150894	0.246094	0.246094	0.263627	0.653588	3.69141
0	0	0	0	0	0	0	0	0	0	0	0.0266671	0.0871549	0.129703	0.151744	0.246094	0.246094	0.271274	0.696058	3.8099
0	0	0	0	0	0	0	0	0	0	0	0.0520106	0.0880232	0.130741	0.164939	0.246094	0.246094	0.283011	0.696058	3.83646
0	0	0	0	0	0	0	0	0	0	0	0.0659242	0.0889934	0.136689	0.168077	0.246094	0.246094	0.295365	0.696058	3.89108
0	0	0	0	0	0	0	0	0	0	0	0.0691681	0.100682	0.150894	0.169735	0.246094	0.246094	0.298621	0.696058	3.89108
0	0	0	0	0	0	0	0	0	0	0	0.0828668	0.100994	0.156247	0.173636	0.246094	0.246094	0.308478	0.696058	3.90282
0	0	0	0	0	0	0	0	0	0	0	0.0829344	0.108057	0.165531	0.176661	0.246094	0.246094	0.31556	0.699551	3.938
0	0	0	0	0	0	0	0	0	0	0	0.0849495	0.113382	0.169622	0.184651	0.246094	0.246094	0.31559	0.713994	4.04157
0	0	0	0	0	0	0	0	0	0	0	0.0850115	0.11967	0.173047	0.191949	0.246094	0.246094	0.328215	0.738281	4.08072
0	0	0	0	0	0	0	0	0	0	0	0.0902269	0.123778	0.173636	0.195096	0.246094	0.246094	0.329814	0.738281	4.43652
0	0	0	0	0	0	0	0	0	0	0	0.0907289	0.124971	0.174026	0.197492	0.246094	0.246094	0.337461	0.738281	4.43652
0	0	0	0	0	0	0	0	0	0	0	0.100682	0.129871	0.179468	0.20388	0.246094	0.246094	0.342752	0.738281	4.43652
0	0	0	0	0	0	0	0	0	0	0	0.104325	0.134006	0.181538	0.206335	0.246094	0.246094	0.346683	0.738281	4.43652
0	0	0	0	0	0	0	0	0	0	0	0.116835	0.134465	0.183646	0.21702	0.246094	0.246094	0.348029	0.738281	4.43652
0	0	0	0	0	0	0	0	0	0	0	0.120916	0.134924	0.186229	0.218074	0.246094	0.246094	0.348029	0.738281	4.43652
0	0	0	0	0	0	0	0	0	0	0	0.121123	0.146172	0.189701	0.218257	0.246094	0.246094	0.348029	0.738281	4.43652
0	0	0	0	0	0	0	0	0	0	0	0.123083	0.151544	0.192654	0.222374	0.246094	0.246688	0.348029	0.738281	4.6583
0	0	0	0	0	0	0	0	0	0	0	0.125007	0.154554	0.197909	0.226076	0.246094	0.248249	0.348029	0.738281	4.92188
0	0	0	0	0	0	0	0	0	0	0	0.125164	0.155418	0.20174	0.228917	0.246094	0.250796	0.348029	0.738281	4.92188
0	0	0	0	0	0	0	0	0	0	0	0.135207	0.163835	0.207483	0.234802	0.246094	0.253309	0.348029	0.738281	5.12807
0	0	0	0	0	0	0	0	0	0	0	0.135739	0.165609	0.21012	0.23812	0.246094	0.260446	0.348029	0.738281	5.15956
0	0	0	0	0	0	0	0	0	0	0	0.136674	0.16739	0.210187	0.23984	0.246094	0.261215	0.348029	0.738281	5.4767
0	0	0	0	0	0	0	0	0	0	0	0.140703	0.171457	0.210659	0.246094	0.246094	0.263627	0.348029	0.775454	5.50282
0	0	0	0	0	0	0	0	0	0	0	0.141758	0.17249	0.214158	0.246094	0.246094	0.26596	0.348029	0.778217	5.55683
0	0	0	0	0	0	0	0	0	0	0	0.146406	0.173636	0.214166	0.246094	0.246094	0.271346	0.348029	0.778217	5.62668
0	0	0	0	0	0	0	0	0	0	0	0.148347	0.175599	0.215169	0.246094	0.246094	0.27492	0.348029	0.778217	6.14855
0	0	0	0	0	0	0	0	0	0	0	0.151368	0.176624	0.218159	0.246094	0.246094	0.276931	0.348029	0.778217	6.15234
0	0	0	0	0	0	0	0	0	0	0	0.153502	0.176953	0.220479	0.246094	0.246094	0.278883	0.348029	0.778217	6.15234
0	0	0	0	0	0	0	0	0	0	0	0.154282	0.179468	0.221084	0.246094	0.246094	0.280878	0.348029	0.778217	6.62628
0	0	0	0	0	0	0	0	0	0	0	0.155413	0.180221	0.225434	0.246094	0.246094	0.282963	0.348029	0.778217	6.62628
0	0	0	0	0	0	0	0	0	0	0	0.155706	0.181665	0.226076	0.246094	0.246094	0.284609	0.353259	0.778217	6.62628
0	0	0	0	0	0	0	0	0	0	0	0.156185	0.181717	0.229024	0.246094	0.246094	0.292598	0.37752	0.784883	6.66492
0	0	0	0	0	0	0	0	0	0	0	0.156605	0.183227	0.232647	0.246094	0.246094	0.296233	0.378708	0.804284	8.25424
0	0	0	0	0	0	0	0	0	0	0	0.159852	0.188197	0.237321	0.246094	0.246094	0.31559	0.381428	0.847235	11.6082
0	0	0	0	0	0	0	0	0	0	0	0.160338	0.195606	0.238209	0.246094	0.246094	0.317667	0.381664	0.871538
0	0	0	0	0	0	0	0	0	0	0	0.161961	0.20174	0.238768	0.246094	0.246094	0.317711	0.383239	0.875082
0	0	0	0	0	0	0	0	0	0	0	0.165609	0.202499	0.240694	0.246094	0.246094	0.324584	0.401667	0.885285
0	0	0	0	0	0	0	0	0	0	0	0.170564	0.205149	0.241822	0.246094	0.246094	0.328215	0.421071	0.887304
0	0	0	0	0	0	0	0	0	0	0	0.175599	0.20549	0.242632	0.246094	0.246094	0.330943	0.423628	0.887304
0	0	0	0	0	0	0	0	0	0	0	0.175956	0.205703	0.245412	0.246094	0.246094	0.332492	0.488741	0.887304
0	0	0	0	0	0	0	0	0	0	0	0.179446	0.208879	0.246094	0.246094	0.246094	0.336088	0.492188	0.887304
0	0	0	0	0	0	0	0	0	0	0	0.181131	0.214689	0.246094	0.246094	0.246094	0.346689	0.492188	0.891126
0	0	0	0	0	0	0	0	0	0	0	0.186342	0.214994	0.246094	0.246094	0.246094	0.348029	0.492188	0.903061
0	0	0	0	0	0	0	0	0	0	0	0.192964	0.217403	0.246094	0.246094	0.246094	0.348029	0.492188	0.950417
0	0	0	0	0	0	0	0	0	0	0	0.197234	0.217758	0.246094	0.246094	0.246094	0.348029	0.492188	0.984375
0	0	0	0	0	0	0	0	0	0	0	0.197326	0.221933	0.246094	0.246094	0.246094	0.348029	0.492188	0.984375
0	0	0	0	0	0	0	0	0	0.0109124	0.0140946	0.202101	0.224658	0.246094	0.246094	0.246094	0.348029	0.492188	0.984375
0	0	0	0	0	0	0	0	0	0.0222184	0.0222184	0.204683	0.224901	0.246094	0.246094	0.246094	0.348029	0.492188	0.984375
0	0	0	0	0	0	0	0	0	0.0260025	0.0372996	0.205149	0.226076	0.246094	0.246094	0.246094	0.348029	0.492188	0.984375
0	0	0	0	0	0	0	0	0	0.0342329	0.0455948	0.206101	0.234546	0.246094	0.246094	0.246094	0.348029	0.492188	0.986017
0	0	0	0	0	0	0	0	0	0.035411	0.04923	0.206259	0.237734	0.246094	0.246094	0.246094	0.348029	0.492188	0.997204
0	0	0	0	0	0	0	0	0	0.047502	0.0555874	0.208545	0.238089	0.246094	0.246094	0.246094	0.348029	0.492188	1.01467
0	0	0	0	0	0	0	0	0	0.04923	0.056255	0.210167	0.23836	0.246094	0.246094	0.246094	0.348029	0.492188	1.01467
0	0	0	0	0	0	0	0	0	0.0502202	0.0597609	0.211942	0.240149	0.246094	0.246094	0.246094	0.348029	0.492188	1.01467
0	0	0	0	0	0	0	0	0	0.051176	0.0624642	0.217965	0.243013	0.246094	0.246094	0.246094	0.348029	0.492188	1.01467
0	0	0	0	0	0	0	0	0	0.0522364	0.0702885	0.219872	0.246094	0.246094	0.246094	0.246094	0.348029	0.492188	1.01467
0	0	0	0	0	0	0	0	0	0.0530565	0.0717354	0.221537	0.246094	0.246094	0.246094	0.246094	0.348029	0.498366	1.04409
0	0	0	0	0	0	0	0	0	0.0549525	0.0775586	0.224439	0.246094	0.246094	0.246094	0.246094	0.348029	0.529765	1.08038
0	0	0	0	0	0	0	0	0	0.0563234	0.0804886	0.224776	0.246094	0.246094	0.246094	0.246688	0.348029	0.530585	1.10056
0	0	0	0	0	0	0	0	0	0.0623629	0.0825603	0.228325	0.246094	0.246094	0.246094	0.252418	0.348029	0.537563	1.10961
0	0	0	0	0	0	0	0	0	0.0628625	0.0854544	0.228604	0.246094	0.246094	0.246094	0.25747	0.348029	0.53904	1.16638
0	0	0	0	0	0	0	0	0	0.063966	0.0880972	0.228947	0.246094	0.246094	0.246094	0.262634	0.348029	0.543922	1.23047
0	0	0	0	0	0	0	0	0.0149744	0.0736101	0.0883336	0.232126	0.246094	0.246094	0.246094	0.263627	0.348029	0.54659	1.23047
0	0	0	0	0	0	0	0	0.0218099	0.0786022	0.0902759	0.232383	0.246094	0.246094	0.246094	0.264403	0.348029	0.547084	1.23047
0	0	0	0	0	0	0	0	0.0228168	0.0795463	0.0903865	0.23461	0.246094	0.246094	0.246094	0.266218	0.348029	0.550282	1.23047
0	0	0	0	0	0	0.0104929	0	0.0281479	0.0844009	0.0908597	0.239711	0.246094	0.246094	0.246094	0.26699	0.348029	0.550282	1.23047
0	0	0	0	0	0	0.0247899	0	0.0340402	0.0913755	0.0923082	0.240255	0.246094	0.246094	0.246094	0.27885	0.348029	0.550282	1.23047
0	0	0	0	0	0	0.0293528	0	0.0469959	0.0917336	0.0923692	0.240592	0.246094	0.246094	0.246094	0.282963	0.348029	0.550282	1.25484
0	0	0	0	0	0	0.035141	0	0.0513225	0.0925497	0.0964921	0.240938	0.246094	0.246094	0.246094	0.284609	0.353161	0.550282	1.25484
0	0	0	0	0	0	0.0403363	0	0.0566926	0.0926372	0.0985067	0.241871	0.246094	0.246094	0.246094	0.296482	0.355065	0.550282	1.25484
0	0	0	0	0	0	0.0501822	0	0.0588452	0.0957052	0.0995057	0.246094	0.246094	0.246094	0.246094	0.299079	0.371132	0.550282	1.25484
0	0	0	0	0	0	0.0514259	0	0.0623084	0.0994366	0.100566	0.246094	0.246094	0.246094	0.246094	0.3005	0.377506	0.550282	1.25484
0	0	0	0	0	0	0.0544881	0.00898242	0.0671968	0.100779	0.109736	0.246094	0.246094	0.246094	0.246094	0.301483	0.380322	0.550282	1.25484
0	0	0	0	0	0	0.0545266	0.0134127	0.0696833	0.102683	0.110315	0.246094	0.246094	0.246094	0.246094	0.304941	0.381256	0.550282	1.25484
0	0	0	0	0	0	0.0561808	0.0177503	0.0758751	0.10396	0.118414	0.246094	0.246094	0.246094	0.246094	0.311872	0.408188	0.550282	1.25484
0	0	0	0	0	0	0.0586954	0.0288814	0.0779427	0.108207	0.121173	0.246094	0.246094	0.246094	0.246094	0.31559	0.427498	0.550282	1.26521
0	0	0	0	0	0	0.0589239	0.0290062	0.0799076	0.12108	0.125007	0.246094	0.246094	0.246094	0.246094	0.316525	0.431945	0.553166	1.26815
0	0	0	0	0	0	0.059033	0.0297728	0.0809032	0.121708	0.135207	0.246094	0.246094	0.246094	0.246094	0.319124	0.440448	0.555761	1.27876
0	0	0	0	0	0	0.061822	0.0366027	0.0841516	0.125007	0.135444	0.246094	0.246094	0.246094	0.246094	0.321425	0.449876	0.55784	1.32526
0	0	0	0	0	0	0.0628434	0.0398081	0.0851908	0.12616	0.135936	0.246094	0.246094	0.246094	0.246094	0.339956	0.451366	0.560912	1.32526
0	0	0	0	0	0	0.0636433	0.039941	0.0862337	0.127017	0.142293	0.246094	0.246094	0.246094	0.246094	0.341012	0.462663	0.564145	1.32526
0	0	0	0	0	0	0.0641227	0.0407419	0.0863367	0.127329	0.143459	0.246094	0.246094	0.246094	0.246094	0.343517	0.463164	0.589858	1.32526
0	0	0	0	0	0	0.0682477	0.0409866	0.0903829	0.12851	0.145564	0.246094	0.246094	0.246094	0.246094	0.348029	0.464277	0.622863	1.32526
0	0	0	0	0	0	0.0693367	0.0411545	0.091969	0.129378	0.145777	0.246094	0.246094	0.246094	0.246094	0.348029	0.473988	0.646321	1.32526
0	0	0	0	0	0	0.0743273	0.0417653	0.0925055	0.131116	0.14901	0.246094	0.246094	0.246094	0.246094	0.348029	0.47878	0.677733	1.33617
0	0	0	0	0	0	0.0773966	0.0422078	0.0926948	0.131185	0.154466	0.246094	0.246094	0.246094	0.246094	0.348029	0.483023	0.683932	1.34844
0	0	0	0	0	0	0.0794744	0.0451433	0.0932988	0.132231	0.156605	0.246094	0.246094	0.246094	0.246094	0.348029	0.484546	0.696058	1.37944
0	0	0	0	0	0	0.0818317	0.0519277	0.0940091	0.132706	0.159291	0.246094	0.246094	0.246094	0.246094	0.348029	0.492188	0.696058	1.42636
0	0	0	0	0	0	0.0853244	0.0520779	0.0952384	0.133696	0.159622	0.246094	0.246094	0.246094	0.246094	0.348029	0.492188	0.696058	1.43316
0	0	0	0	0	0	0.0857899	0.061359	0.0955498	0.134292	0.159715	0.246094	0.246094	0.246094	0.246094	0.348029	0.492188	0.738281	1.43496
0	0	0	0	0	0	0.0884597	0.0621632	0.0957052	0.1387	0.16344	0.246094	0.246094	0.246094	0.246094	0.348029	0.492188	0.738281	1.43496
0	0	0	0	0	0	0.0890779	0.0656155	0.105463	0.139368	0.164086	0.246094	0.246094	0.246094	0.247076	0.348029	0.492188	0.738281	1.45175
0	0	0	0	0	0	0.0938848	0.0739122	0.108064	0.139614	0.165609	0.246094	0.246094	0.246094	0.24948	0.348029	0.492188	0.738281	1.45928
0	0	0	0	0	0	0.0943888	0.075487	0.108836	0.139739	0.171971	0.246094	0.246094	0.246094	0.249948	0.348029	0.492188	0.738281	1.47481
0	0	0	0	0	0	0.0955101	0.0765951	0.109277	0.142208	0.172745	0.246094	0.246094	0.246094	0.25424	0.348029	0.492188	0.738281	1.47656
0	0	0	0	0	0	0.0964751	0.0774717	0.109606	0.14477	0.17457	0.246094	0.246094	0.246094	0.254532	0.348029	0.492188	0.738281	1.49693
0	0	0	0	0	0	0.099029	0.0813711	0.110119	0.144868	0.175599	0.246094	0.246094	0.246094	0.25747	0.348029	0.492188	0.738281	1.57577
0	0	0	0	0	0	0.0991536	0.0868744	0.110683	0.145991	0.178743	0.246094	0.246094	0.246094	0.260045	0.348029	0.492188	0.738281	1.5868
0	0	0	0	0	0	0.100049	0.0872631	0.111532	0.147387	0.179659	0.246094	0.246094	0.246094	0.262387	0.348029	0.492188	0.738281	1.65085
0	0	0	0	0	0	0.100235	0.0887171	0.112864	0.161921	0.180837	0.246094	0.246094	0.246094	0.262634	0.348029	0.492188	0.742795	1.69596
0	0	0	0	0	0	0.10042	0.0905093	0.113132	0.162505	0.181025	0.246094	0.246094	0.246094	0.263947	0.348029	0.492188	0.751838	1.72266
0	0	0	0	0	0	0.100422	0.0909077	0.114676	0.164341	0.182333	0.246094	0.246094	0.246094	0.264403	0.348029	0.492188	0.760044	1.74015
0	0	0	0	0	0	0.10133	0.0913526	0.115093	0.164362	0.182532	0.246094	0.246094	0.246094	0.26646	0.348029	0.492188	0.775138	1.77461
0	0	0	0	0	0	0.101676	0.092256	0.115316	0.165728	0.183186	0.246094	0.246094	0.246094	0.276755	0.348029	0.492188	0.778217	1.79159
0	0	0	0	0	0	0.103564	0.0957052	0.119229	0.167799	0.186442	0.246094	0.246094	0.246094	0.278348	0.348029	0.492188	0.778217	1.79159
0	0	0	0	0	0	0.104991	0.0958507	0.119431	0.170338	0.187198	0.246094	0.246094	0.246094	0.282963	0.348029	0.492188	0.778217	1.83962
0	0	0	0	0	0	0.105877	0.100486	0.12124	0.171316	0.189864	0.246094	0.246094	0.246094	0.284609	0.348029	0.492188	0.778217	1.87419
0	0	0	0	0	0	0.106219	0.102073	0.122709	0.176213	0.190129	0.246094	0.246094	0.246094	0.284919	0.348029	0.492188	0.778217	1.88696
0	0	0	0	0	0	0.106933	0.104203	0.123893	0.178313	0.192863	0.246094	0.246094	0.246094	0.289242	0.359176	0.492188	0.778217	1.92181
0	0	0	0	0	0	0.107261	0.10527	0.127086	0.179297	0.193756	0.246094	0.246094	0.246094	0.289756	0.359464	0.492188	0.778217	1.98407
0	0	0	0	0	0	0.107808	0.105729	0.127224	0.179766	0.194169	0.246094	0.246094	0.246094	0.290607	0.362815	0.492188	0.778217	2.02561
0	0	0	0	0	0	0.112808	0.107545	0.129922	0.180716	0.195429	0.246094	0.246094	0.246094	0.292502	0.369033	0.510454	0.778217	2.10598
0	0	0	0	0	0.0074084	0.117622	0.107767	0.130761	0.180806	0.195804	0.246094	0.246094	0.246094	0.298355	0.37323	0.527006	0.778217	2.11698
0	0	0	0	0	0.0184673	0.117676	0.108708	0.133887	0.181234	0.196195	0.246094	0.246094	0.246094	0.300786	0.377318	0.550282	0.779409	2.17612
0	0	0	0	0.00444674	0.0271209	0.117984	0.111382	0.1347	0.184673	0.197394	0.246094	0.246094	0.246094	0.301609	0.382249	0.550282	0.781899	2.22408
0	0	0	0	0.00960475	0.0308355	0.118782	0.112588	0.134705	0.187479	0.198456	0.246094	0.246094	0.246094	0.304372	0.401482	0.550282	0.793329	2.26887
0	0	0	0	0.0146508	0.0324853	0.118886	0.11329	0.134814	0.187587	0.200671	0.246094	0.246094	0.246094	0.305093	0.402651	0.550282	0.801255	2.26887
0	0	0	0	0.0146694	0.0344788	0.11899	0.113423	0.135727	0.188273	0.207524	0.246094	0.246094	0.246094	0.312725	0.405387	0.550282	0.804202	2.28223
0	0	0	0	0.0177567	0.0366742	0.120555	0.116715	0.137844	0.188758	0.209167	0.246094	0.246094	0.246094	0.316273	0.408571	0.550282	0.816813	2.28731
0	0	0	0	0.0193512	0.0396854	0.121985	0.119552	0.138241	0.188899	0.212334	0.246094	0.246094	0.246094	0.320021	0.418516	0.550282	0.818518	2.29496
0	0	0	0	0.0206851	0.0422273	0.122183	0.119884	0.138534	0.189929	0.21302	0.246094	0.246094	0.246094	0.326128	0.421387	0.550282	0.835593	2.32164
0	0	0	0	0.021183	0.043758	0.122741	0.127437	0.138842	0.190791	0.218736	0.246094	0.246094	0.246094	0.329569	0.423559	0.550282	0.846282	2.32164
0	0	0	0	0.0251028	0.0439215	0.123491	0.127784	0.140021	0.19389	0.224352	0.246094	0.246094	0.246094	0.332768	0.429387	0.550282	0.850695	2.32164
0	0	0	0	0.0269124	0.0440312	0.123948	0.128886	0.140103	0.195832	0.226834	0.246094	0.246094	0.246094	0.333832	0.445503	0.550282	0.852197	2.33874
0	0	0	0	0.0274965	0.0472809	0.125233	0.128912	0.141653	0.197872	0.228159	0.246094	0.246094	0.246094	0.348029	0.450159	0.550282	0.879045	2.35463
0	0	0	0	0.0292844	0.0510136	0.12524	0.129129	0.142208	0.199323	0.229689	0.246094	0.246094	0.246094	0.348029	0.450668	0.550282	0.880752	2.36209
0	0	0	0	0.030817	0.0521463	0.126033	0.131222	0.143994	0.199757	0.231596	0.246094	0.246094	0.246094	0.348029	0.457744	0.550282	0.882945	2.43162
0	0	0	0	0.0312345	0.0548245	0.126453	0.132535	0.144258	0.208046	0.235154	0.246094	0.246094	0.246094	0.348029	0.465278	0.550282	0.887304	2.43191
0	0	0	0	0.0338594	0.0554292	0.126682	0.133129	0.146131	0.208266	0.236204	0.246094	0.246094	0.246094	0.348029	0.47596	0.550282	0.887304	2.46094
0	0	0	0	0.035673	0.0572697	0.127767	0.134584	0.1467	0.212219	0.236685	0.246094	0.246094	0.246094	0.348029	0.476605	0.550282	0.887304	2.47321
0	0	0	0	0.0359375	0.0574701	0.129179	0.135839	0.14705	0.212398	0.24092	0.246094	0.246094	0.246094	0.348029	0.477498	0.550282	0.887304	2.49664
0	0	0	0	0.0361366	0.0598485	0.130537	0.13655	0.147677	0.212991	0.241792	0.246094	0.246094	0.246094	0.348029	0.48066	0.550282	0.887304	2.50967
0	0	0	0	0.0362155	0.0608838	0.131352	0.137173	0.153951	0.213103	0.243425	0.246094	0.246094	0.246094	0.348029	0.485129	0.550282	0.887304	2.53369
0	0	0	0	0.0362679	0.0611304	0.131794	0.137587	0.155811	0.213274	0.246094	0.246094	0.246094	0.246094	0.348029	0.485477	0.550282	0.898685	2.5443
0	0	0	0	0.0379272	0.0617795	0.132111	0.138056	0.160283	0.213639	0.246094	0.246094	0.246094	0.246094	0.348029	0.485507	0.550282	0.906461	2.55697
0	0	0	0	0.0383906	0.0630598	0.132957	0.138309	0.16039	0.214305	0.246094	0.246094	0.246094	0.246094	0.348029	0.489881	0.550357	0.915187	2.56929
0	0	0	0	0.0403748	0.0649671	0.132965	0.140788	0.163372	0.214813	0.246094	0.246094	0.246094	0.246094	0.348029	0.492188	0.567536	0.940658	2.58385
0	0	0	0	0.0428205	0.0682319	0.133609	0.145053	0.163479	0.216766	0.246094	0.246094	0.246094	0.246094	0.348029	0.492188	0.568166	0.942457	2.58497
0	0	0	0	0.0444765	0.0691165	0.133761	0.145849	0.16365	0.21964	0.246094	0.246094	0.246094	0.246094	0.348029	0.492188	0.599072	0.984375	2.59316
0	0	0	0	0.0446036	0.0692662	0.134847	0.146674	0.164961	0.220612	0.246094	0.246094	0.246094	0.246094	0.348029	0.492188	0.612941	0.984375	2.61323
0	0	0	0	0.045405	0.0710451	0.135041	0.147366	0.168898	0.222261	0.246094	0.246094	0.246094	0.246094	0.348029	0.492188	0.615283	0.984375	2.64183
0	0	0	0	0.0495407	0.0711994	0.135261	0.149118	0.169557	0.222507	0.246094	0.246094	0.246094	0.246094	0.348029	0.492188	0.617975	0.984375	2.65051
0	0	0	0	0.0496597	0.0733327	0.13538	0.150186	0.170371	0.224841	0.246094	0.246094	0.246094	0.246094	0.348029	0.492188	0.623701	0.984375	2.70703
0	0	0	0	0.0497214	0.0740465	0.13651	0.151174	0.170863	0.22538	0.246094	0.246094	0.246094	0.24632	0.348029	0.492188	0.628873	0.984375	2.70703
0	0	0	0	0.0501562	0.0744287	0.136951	0.152886	0.172015	0.225939	0.246094	0.246094	0.246094	0.24797	0.348029	0.492188	0.645044	0.984375	2.71186
0	0	0	0	0.0528135	0.0764259	0.137279	0.153284	0.175034	0.227222	0.246094	0.246094	0.246094	0.250386	0.348029	0.492188	0.661617	1.01467	2.71781
0	0	0	0	0.0534546	0.0768816	0.137662	0.153768	0.176425	0.227323	0.246094	0.246094	0.246094	0.255275	0.348029	0.492188	0.6721	1.01467	2.71819
0	0	0	0	0.0540567	0.0770207	0.139797	0.156028	0.177888	0.22777	0.246094	0.246094	0.246094	0.25747	0.348029	0.492188	0.673427	1.01467	2.73454
0	0	0	0	0.0559288	0.0771343	0.139859	0.156246	0.178587	0.230851	0.246094	0.246094	0.246094	0.25953	0.348029	0.492188	0.674697	1.01467	2.74509
0	0	0	0	0.0571416	0.0775929	0.140057	0.156406	0.179345	0.232697	0.246094	0.246094	0.246094	0.260833	0.348029	0.492188	0.678372	1.01467	2.75141
0	0	0	0	0.0579399	0.0788647	0.140671	0.156803	0.179503	0.233119	0.246094	0.246094	0.246094	0.26196	0.348029	0.492188	0.692487	1.01467	2.75141
0	0	0	0	0.0597671	0.0791727	0.140765	0.157287	0.18026	0.233519	0.246094	0.246094	0.246094	0.262634	0.348029	0.492188	0.696058	1.01467	2.77707
0	0	0	0	0.0605367	0.0796403	0.140873	0.159469	0.180444	0.234537	0.246094	0.246094	0.246094	0.265255	0.348029	0.492188	0.696058	1.01467	2.78013
0	0	0	0	0.060835	0.0806107	0.141958	0.160621	0.181587	0.236409	0.246094	0.246094	0.246094	0.265483	0.348029	0.492188	0.696058	1.01467	2.8059
0	0	0	0	0.061365	0.0807837	0.143583	0.160965	0.184292	0.237111	0.246094	0.246094	0.246094	0.26863	0.348029	0.492188	0.696058	1.01467	2.81739
0	0	0	0	0.0617386	0.0813485	0.143926	0.163199	0.184695	0.237592	0.246094	0.246094	0.246094	0.269606	0.348029	0.492188	0.696058	1.01467	2.93637
0	0	0	0	0.062808	0.082759	0.144516	0.163204	0.184744	0.241083	0.246094	0.246094	0.246094	0.270134	0.348029	0.492188	0.696058	1.01467	2.95411
0	0	0	0.00811177	0.063339	0.0850019	0.144899	0.163508	0.185461	0.241932	0.246094	0.246094	0.246094	0.27016	0.35884	0.492188	0.696058	1.04409	2.96577
0	0	0	0.0084195	0.064629	0.0854467	0.145376	0.166341	0.186228	0.246094	0.246094	0.246094	0.246094	0.270317	0.359054	0.492188	0.696058	1.04418	2.97356
0	0	0	0.00854711	0.0648311	0.0857397	0.145567	0.166665	0.187515	0.246094	0.246094	0.246094	0.246094	0.270999	0.362569	0.492188	0.698684	1.04972	2.97356
0	0	0	0.00958345	0.0651299	0.0863584	0.145568	0.166929	0.188823	0.246094	0.246094	0.246094	0.246094	0.27988	0.364843	0.492188	0.716468	1.06016	2.97569
0	0	0	0.0111424	0.0669312	0.0872971	0.146417	0.167871	0.189022	0.246094	0.246094	0.246094	0.246094	0.280126	0.365514	0.492188	0.723621	1.08685	2.97903
0	0	0	0.0131936	0.0678239	0.0878373	0.147037	0.168986	0.189154	0.246094	0.246094	0.246094	0.246094	0.280487	0.373043	0.492188	0.738281	1.0995	2.99386
0	0	0	0.0132645	0.067897	0.0892564	0.147986	0.169822	0.189692	0.246094	0.246094	0.246094	0.246094	0.281386	0.374173	0.492188	0.738281	1.10056	3.08355
0	0	0	0.0139434	0.0681871	0.0900532	0.148966	0.170126	0.190852	0.246094	0.246094	0.246094	0.246094	0.282615	0.385027	0.492188	0.738281	1.10056	3.08383
0	0	0	0.0140214	0.0701074	0.0903708	0.149335	0.171161	0.191424	0.246094	0.246094	0.246094	0.246094	0.28451	0.388728	0.50027	0.738281	1.10056	3.0869
0	0	0	0.0151428	0.0715773	0.0906879	0.149613	0.171421	0.193066	0.246094	0.246094	0.246094	0.246094	0.285872	0.389876	0.501704	0.738281	1.10056	3.1045
0	0	0	0.0163842	0.0722129	0.090766	0.150517	0.175598	0.193379	0.246094	0.246094	0.246094	0.246094	0.287254	0.398368	0.504443	0.738281	1.10056	3.11099
0	0	0	0.0188615	0.0725079	0.0928479	0.150709	0.175978	0.19395	0.246094	0.246094	0.246094	0.246094	0.293846	0.400064	0.514023	0.738281	1.10056	3.12723
0	0	0	0.0191483	0.072671	0.0935266	0.152317	0.176104	0.196752	0.246094	0.246094	0.246094	0.246094	0.296384	0.403373	0.52426	0.738281	1.10056	3.15154
0	0	0	0.0198178	0.0728896	0.094577	0.152462	0.178682	0.198204	0.246094	0.246094	0.246094	0.246094	0.305879	0.41151	0.535617	0.738281	1.10056	3.15154
0	0	0	0.0212073	0.0738095	0.0947481	0.153602	0.179888	0.198225	0.246094	0.246094	0.246094	0.246094	0.307761	0.412129	0.550282	0.738281	1.12351	3.17544
0	0	0	0.0214924	0.0741658	0.0967265	0.153723	0.180254	0.198803	0.246094	0.246094	0.246094	0.246094	0.307791	0.41617	0.550282	0.738281	1.1261	3.17783
0	0	0	0.0215272	0.074212	0.0979386	0.154224	0.180548	0.199528	0.246094	0.246094	0.246094	0.246094	0.311212	0.417659	0.550282	0.738281	1.18801	3.1932
0	0	0	0.0241749	0.0754417	0.100787	0.156741	0.181066	0.201423	0.246094	0.246094	0.246094	0.246094	0.312678	0.417676	0.550282	0.738281	1.21235	3.20025
0	0	0	0.0255893	0.0757894	0.102588	0.156795	0.181582	0.202603	0.246094	0.246094	0.246094	0.246094	0.327543	0.422247	0.550282	0.738281	1.22776	3.20867
0	0	0	0.0265716	0.0762631	0.102946	0.157633	0.181849	0.203465	0.246094	0.246094	0.246094	0.246094	0.332891	0.432333	0.550282	0.738281	1.23047	3.20867
0	0	0	0.0306436	0.0779929	0.103008	0.158135	0.181991	0.205332	0.246094	0.246094	0.246094	0.246094	0.334647	0.439898	0.550282	0.738281	1.23047	3.20867
0	0	0	0.0306634	0.0786263	0.103237	0.158697	0.182415	0.205366	0.246094	0.246094	0.246094	0.246094	0.338522	0.440206	0.550282	0.739532	1.23047	3.20867
0	0	0	0.0323129	0.0789157	0.103702	0.161684	0.183837	0.205578	0.246094	0.246094	0.246094	0.246094	0.339629	0.451422	0.550282	0.75015	1.23047	3.20867
0	0	0	0.0339647	0.0792483	0.103917	0.162324	0.187679	0.206165	0.246094	0.246094	0.246094	0.246094	0.345742	0.451488	0.550282	0.750432	1.23047	3.21136
0	0	0	0.0362019	0.0796865	0.104723	0.162954	0.188566	0.207163	0.246094	0.246094	0.246094	0.246094	0.34721	0.454287	0.550282	0.754532	1.23047	3.26287
0	0	0	0.0363757	0.0800877	0.105029	0.163349	0.189022	0.208271	0.246094	0.246094	0.246094	0.247833	0.348029	0.456423	0.550282	0.761392	1.23047	3.2686
0	0	0	0.0364227	0.0800895	0.105133	0.163941	0.190913	0.210597	0.246094	0.246094	0.246094	0.259739	0.348029	0.467052	0.550282	0.778217	1.23047	3.29394
0	0	0	0.0382684	0.0805605	0.108733	0.164616	0.191299	0.210713	0.246094	0.246094	0.246094	0.262603	0.348029	0.469782	0.550282	0.778217	1.23047	3.29877
0	0	0	0.0403492	0.0851344	0.109758	0.164921	0.191473	0.212219	0.246094	0.246094	0.246094	0.264067	0.348029	0.471963	0.550282	0.778217	1.23379	3.30016
0	0	0	0.0403849	0.0856929	0.110512	0.164937	0.192013	0.214572	0.246094	0.246094	0.246094	0.266593	0.348029	0.472118	0.550282	0.778217	1.25484	3.30817
0	0	0	0.0410691	0.0863751	0.110907	0.165072	0.192098	0.21483	0.246094	0.246094	0.246094	0.26723	0.348029	0.475355	0.550282	0.778217	1.25484	3.31085
0	0	0	0.0412682	0.0868269	0.112024	0.165218	0.192405	0.214903	0.246094	0.246094	0.246094	0.268117	0.348029	0.476474	0.550282	0.778217	1.25484	3.32323
0	0	0	0.0428359	0.0869798	0.112104	0.166114	0.193458	0.215862	0.246094	0.246094	0.246094	0.273395	0.348029	0.481137	0.550282	0.778217	1.25484	3.32401
0	0	0	0.0428587	0.0873465	0.112644	0.167088	0.194151	0.217426	0.246094	0.246094	0.246094	0.274962	0.348029	0.483823	0.550282	0.778217	1.25484	3.32608
0	0	0	0.0431845	0.0884313	0.112926	0.16768	0.1952	0.217886	0.246094	0.246094	0.246094	0.275873	0.348029	0.485299	0.550282	0.778217	1.25484	3.32628
0	0	0	0.0434551	0.088639	0.113865	0.167716	0.195345	0.219901	0.246094	0.246094	0.246094	0.277878	0.348029	0.485551	0.550282	0.778217	1.25484	3.33314
0	0	0	0.0434911	0.0896205	0.114024	0.171487	0.195653	0.220243	0.246094	0.246094	0.246094	0.277917	0.348029	0.487816	0.550282	0.778217	1.25484	3.35884
0	0	0	0.0449005	0.0897393	0.114521	0.171626	0.196752	0.220779	0.246094	0.246094	0.246094	0.278335	0.348029	0.491492	0.550282	0.778217	1.25484	3.36322
0	0	0	0.0456822	0.0900212	0.114689	0.173978	0.19747	0.220992	0.246094	0.246094	0.246094	0.278397	0.348029	0.492188	0.550282	0.778217	1.25484	3.36717
0	0	0	0.0470253	0.0901128	0.114988	0.175262	0.197586	0.222222	0.246094	0.246094	0.246094	0.282853	0.348029	0.492188	0.550282	0.778217	1.29541	3.40064
0	0	0	0.0497969	0.0901259	0.118217	0.175331	0.197716	0.223123	0.246094	0.246094	0.246094	0.283705	0.348029	0.492188	0.550282	0.778217	1.32526	3.41173
0	0	0	0.0498022	0.0903869	0.118349	0.176121	0.199044	0.223848	0.246094	0.246094	0.246094	0.284771	0.348029	0.492188	0.550282	0.78436	1.32526	3.4432
0	0	0	0.0500125	0.0905148	0.119152	0.176367	0.199402	0.225648	0.246094	0.246094	0.246094	0.28684	0.348029	0.492188	0.550282	0.785907	1.32526	3.45409
0	0	0	0.0503359	0.0909632	0.119306	0.17685	0.199687	0.225877	0.246094	0.246094	0.246094	0.288763	0.348029	0.492188	0.550282	0.790606	1.32526	3.47158
0	0	0	0.0507564	0.0909669	0.119851	0.177877	0.200158	0.226986	0.246094	0.246094	0.246094	0.290445	0.348029	0.492188	0.553349	0.791441	1.32526	3.48029
0	0	0	0.0513131	0.0914259	0.120326	0.178923	0.200603	0.227027	0.246094	0.246094	0.246094	0.293898	0.348029	0.492188	0.554709	0.792741	1.35083	3.48029
0	0	0	0.0514808	0.0921752	0.121081	0.179398	0.20161	0.230294	0.246094	0.246094	0.246094	0.297828	0.348029	0.492188	0.560149	0.801768	1.3571	3.49011
0	0	0	0.0526475	0.092549	0.121112	0.180108	0.202271	0.230981	0.246094	0.246094	0.246094	0.298991	0.348029	0.492188	0.560859	0.805472	1.39212	3.51117
0	0	0	0.0528346	0.092827	0.121205	0.18036	0.204211	0.23111	0.246094	0.246094	0.246094	0.299035	0.348029	0.492188	0.566574	0.810053	1.39212	3.52353
0	0	0	0.0529674	0.0929244	0.121501	0.180389	0.204472	0.231364	0.246094	0.246094	0.246094	0.300766	0.348029	0.492188	0.569447	0.810359	1.41287	3.53206
0	0	0	0.0532715	0.0936117	0.123057	0.180782	0.205886	0.232954	0.246094	0.246094	0.246094	0.300832	0.348029	0.492188	0.578901	0.821954	1.43496	3.60032
0	0	0	0.0537512	0.0936329	0.123135	0.181384	0.205936	0.233864	0.246094	0.246094	0.246094	0.302115	0.348029	0.492188	0.584143	0.836649	1.43496	3.61559
0	0	0	0.0537805	0.094526	0.123659	0.182118	0.207367	0.234256	0.246094	0.246094	0.246094	0.303533	0.348029	0.492188	0.59029	0.839198	1.43496	3.65694
0	0	0	0.0546396	0.0949093	0.124265	0.18282	0.207554	0.234389	0.246094	0.246094	0.246094	0.305212	0.348029	0.492188	0.591689	0.846955	1.47656	3.65845
0	0	0	0.0552272	0.0949811	0.124482	0.183602	0.208152	0.235227	0.246094	0.246094	0.246094	0.315785	0.348029	0.492188	0.594964	0.879641	1.47656	3.65845
0	0	0	0.0554069	0.0958917	0.125174	0.184061	0.208318	0.236132	0.246094	0.246094	0.246094	0.321622	0.348029	0.492188	0.599726	0.887304	1.47656	3.65845
0	0	0	0.0557343	0.0961525	0.125567	0.184864	0.210739	0.237111	0.246094	0.246094	0.246094	0.323576	0.348029	0.492188	0.600316	0.887304	1.47656	3.67511
0	0	0	0.0560048	0.0973515	0.125644	0.185268	0.212031	0.237456	0.246094	0.246094	0.246094	0.324492	0.348029	0.492188	0.60328	0.887304	1.47656	3.68197
0	0	0	0.0560716	0.0984902	0.125783	0.185604	0.212219	0.238259	0.246094	0.246094	0.246094	0.332212	0.348029	0.492188	0.611854	0.887304	1.49693	3.68224
0	0	0	0.0570624	0.0987256	0.126012	0.186749	0.213089	0.239156	0.246094	0.246094	0.246094	0.333666	0.348029	0.492188	0.621159	0.887304	1.51713	3.69141
0	0	0	0.0584659	0.0989738	0.126555	0.186896	0.215118	0.23919	0.246094	0.246094	0.246094	0.337373	0.348029	0.492188	0.631007	0.887304	1.57577	3.69141
0	0	0	0.059621	0.0992127	0.126557	0.186957	0.215417	0.239882	0.246094	0.246094	0.246094	0.337461	0.348029	0.492188	0.633454	0.892232	1.57577	3.6996
0	0	0	0.0598707	0.0994174	0.128717	0.186988	0.216286	0.240023	0.246094	0.246094	0.246094	0.342694	0.348029	0.492188	0.651525	0.903903	1.57577	3.70323
0	0	0	0.0602795	0.0995014	0.128857	0.187035	0.216833	0.240088	0.246094	0.246094	0.246094	0.346047	0.348029	0.492188	0.66405	0.930965	1.62936	3.71972
0	0	0	0.0613569	0.100081	0.130953	0.187429	0.218533	0.241221	0.246094	0.246094	0.246094	0.348029	0.348029	0.492188	0.66443	0.932181	1.64331	3.72407
0	0	0.0046335	0.0615574	0.100197	0.130985	0.187804	0.219168	0.246029	0.246094	0.246094	0.246094	0.348029	0.359303	0.492188	0.667088	0.93647	1.68186	3.72796
0	0	0.0058457	0.0620333	0.101442	0.131425	0.18819	0.219267	0.246094	0.246094	0.246094	0.246094	0.348029	0.367689	0.492188	0.669381	0.943062	1.6971	3.7494
0	0	0.0073262	0.0624352	0.10161	0.13172	0.189489	0.219395	0.246094	0.246094	0.246094	0.246094	0.348029	0.375694	0.492188	0.671291	0.984375	1.71481	3.75629
0	0	0.00879419	0.0626899	0.101949	0.131768	0.189496	0.219977	0.246094	0.246094	0.246094	0.247181	0.348029	0.379545	0.492188	0.673333	0.984375	1.72266	3.75646
0	0	0.00917009	0.0627371	0.102073	0.133858	0.190555	0.220527	0.246094	0.246094	0.246094	0.250702	0.348029	0.385054	0.492188	0.681143	0.984375	1.74015	3.80106
0	0	0.011375	0.062766	0.102628	0.135665	0.1911	0.220779	0.246094	0.246094	0.246094	0.25373	0.348029	0.386292	0.492188	0.687001	0.984375	1.74015	3.8204
0	0	0.0114142	0.0637279	0.102698	0.136367	0.191138	0.22131	0.246094	0.246094	0.246094	0.254421	0.348029	0.393725	0.492188	0.689577	0.984375	1.74015	3.82681
0	0	0.0130801	0.0643101	0.102736	0.13668	0.191849	0.22146	0.246094	0.246094	0.246094	0.255319	0.348029	0.395102	0.492188	0.696058	0.984375	1.74015	3.84411
0	0	0.0138558	0.0645765	0.10312	0.137274	0.192016	0.225454	0.246094	0.246094	0.246094	0.257204	0.348029	0.40245	0.492188	0.696058	0.984375	1.74015	3.84411
0	0	0.0139309	0.0655053	0.103181	0.137724	0.193496	0.225531	0.246094	0.246094	0.246094	0.257518	0.348029	0.407754	0.492188	0.696058	0.984375	1.75431	3.84411
0	0	0.0158363	0.0658692	0.104571	0.137939	0.193813	0.225603	0.246094	0.246094	0.246094	0.258857	0.348029	0.408757	0.492188	0.696058	0.984375	1.76026	3.85198
0	0	0.0176438	0.0661577	0.104862	0.14001	0.194451	0.225966	0.246094	0.246094	0.246094	0.261415	0.348029	0.408801	0.492188	0.696058	0.984375	1.77461	3.85198
0	0	0.0192371	0.0665148	0.104902	0.141699	0.194733	0.226408	0.246094	0.246094	0.246094	0.262731	0.348029	0.409646	0.492188	0.696058	0.98631	1.77461	3.89108
0	0	0.0194184	0.0668733	0.104904	0.143061	0.195209	0.227213	0.246094	0.246094	0.246094	0.2628	0.348029	0.410766	0.492188	0.696058	0.993764	1.79182	3.90816
0	0	0.0211655	0.0668741	0.105098	0.143179	0.196024	0.227495	0.246094	0.246094	0.246094	0.263738	0.348029	0.414431	0.492188	0.696058	0.995898	1.80241	3.9375
0	0	0.0212412	0.0676173	0.105453	0.143291	0.196383	0.228698	0.246094	0.246094	0.246094	0.265835	0.348029	0.415041	0.492188	0.699983	1.00452	1.83207	3.95351
0	0	0.0218456	0.0677724	0.105758	0.143402	0.19673	0.229549	0.246094	0.246094	0.246094	0.265988	0.348029	0.418646	0.492188	0.707873	1.01467	1.83932	3.97376
0	0	0.0238104	0.0678106	0.106083	0.144726	0.196752	0.229904	0.246094	0.246094	0.246094	0.269991	0.348029	0.420893	0.493979	0.710501	1.01467	1.87419	3.97577
0	0	0.02502	0.0691485	0.106329	0.14524	0.19804	0.230681	0.246094	0.246094	0.246094	0.272853	0.348029	0.426074	0.49977	0.714902	1.01467	1.92205	3.97577
0	0	0.0260302	0.0692403	0.10633	0.146787	0.198441	0.230808	0.246094	0.246094	0.246094	0.273123	0.348029	0.43261	0.500326	0.720325	1.01467	1.92205	3.99966
0	0	0.0266194	0.0693786	0.106333	0.146951	0.199239	0.232046	0.246094	0.246094	0.246094	0.27839	0.348029	0.436147	0.500919	0.725143	1.01467	1.92205	4.00669
0	0	0.0271867	0.0697346	0.10634	0.147499	0.199329	0.232318	0.246094	0.246094	0.246094	0.283422	0.348029	0.439193	0.503786	0.725164	1.01467	1.92731	4.01507
0	0	0.0273089	0.0702521	0.106699	0.147605	0.200164	0.232705	0.246094	0.246094	0.246094	0.284798	0.348029	0.441727	0.511209	0.728	1.01467	1.93642	4.03624
0	0	0.028018	0.0715809	0.106722	0.147976	0.200523	0.233839	0.246094	0.246094	0.246094	0.28853	0.348029	0.442118	0.519038	0.738281	1.01467	1.96875	4.04468
0	0	0.0288948	0.0719009	0.107264	0.148249	0.201027	0.233912	0.246094	0.246094	0.246094	0.288606	0.348029	0.443091	0.520593	0.738281	1.01467	1.97758	4.05872
0	0	0.0322291	0.0722513	0.107365	0.149996	0.201994	0.234525	0.246094	0.246094	0.246094	0.290517	0.348029	0.445726	0.530058	0.738281	1.01467	1.98407	4.06867
0	0	0.0326763	0.0723702	0.107928	0.15084	0.202493	0.235837	0.246094	0.246094	0.246094	0.29127	0.348029	0.44729	0.535603	0.738281	1.01467	2.02934	4.07358
0	0	0.0353693	0.0725978	0.107979	0.150979	0.202549	0.236	0.246094	0.246094	0.246094	0.293393	0.348029	0.448601	0.535924	0.738281	1.01467	2.08588	4.07358
0	0	0.0366376	0.0726958	0.108147	0.1514	0.203052	0.236726	0.246094	0.246094	0.246094	0.294443	0.348029	0.456159	0.540505	0.738281	1.01467	2.08817	4.10835
0	0	0.0387512	0.0728189	0.108445	0.151537	0.203734	0.237456	0.246094	0.246094	0.246094	0.297711	0.348029	0.459054	0.550282	0.738281	1.01997	2.09391	4.12528
0	0	0.0390788	0.073706	0.108697	0.151999	0.20388	0.237881	0.246094	0.246094	0.246094	0.298774	0.348029	0.469284	0.550282	0.738281	1.0206	2.11199	4.16208
0	0	0.0402783	0.0738941	0.108975	0.152121	0.204001	0.239514	0.246094	0.246094	0.246094	0.301304	0.348029	0.473077	0.550282	0.738281	1.03222	2.11698	4.18284
0	0	0.0405064	0.0739037	0.109129	0.152189	0.205753	0.239616	0.246094	0.246094	0.246094	0.301979	0.348029	0.47597	0.550282	0.738281	1.04409	2.11698	4.18359
0	0	0.0413632	0.0740657	0.111189	0.15236	0.205893	0.240057	0.246094	0.246094	0.246094	0.309493	0.348029	0.479017	0.550282	0.738281	1.04409	2.11698	4.18359
0	0	0.0420419	0.074096	0.112381	0.152411	0.206453	0.240543	0.246094	0.246094	0.246094	0.310588	0.348029	0.492188	0.550282	0.738281	1.04409	2.11825	4.19559
0	0	0.0439167	0.074554	0.112417	0.15256	0.206539	0.241624	0.246094	0.246094	0.246094	0.311236	0.348029	0.492188	0.550282	0.738281	1.04409	2.12154	4.19727
0	0	0.0443693	0.0747179	0.112978	0.153163	0.206552	0.241646	0.246094	0.246094	0.246094	0.31846	0.348029	0.492188	0.550282	0.738281	1.04409	2.12771	4.20593
0	0	0.0452766	0.0748566	0.113114	0.154744	0.207251	0.242256	0.246094	0.246094	0.246094	0.319609	0.348029	0.492188	0.550282	0.738281	1.04445	2.14003	4.22705
0	0	0.0453416	0.0762926	0.11363	0.15528	0.207794	0.242531	0.246094	0.246094	0.246094	0.320531	0.348029	0.492188	0.550282	0.738281	1.06793	2.20113	4.23396
0	0	0.046227	0.0765003	0.113931	0.155766	0.208318	0.242783	0.246094	0.246094	0.246094	0.320684	0.348029	0.492188	0.550282	0.738281	1.07155	2.24295	4.23396
0	0	0.0462725	0.0767262	0.114175	0.156439	0.209044	0.242806	0.246094	0.246094	0.246094	0.321329	0.348029	0.492188	0.550282	0.738281	1.08392	2.26887	4.23396
0	0	0.0467236	0.078343	0.1154	0.157019	0.209213	0.243538	0.246094	0.246094	0.246094	0.321389	0.348029	0.492188	0.550282	0.738281	1.10056	2.26887	4.24016
0	0	0.048483	0.0786874	0.116542	0.157656	0.20923	0.243895	0.246094	0.246094	0.246094	0.322648	0.348029	0.492188	0.550282	0.746216	1.10056	2.26887	4.30488
0	0	0.0490971	0.0789382	0.116805	0.158336	0.210352	0.244295	0.246094	0.246094	0.246094	0.323674	0.348029	0.492188	0.550282	0.750266	1.10056	2.32164	4.31884
0	0	0.049283	0.0806092	0.11797	0.159585	0.210709	0.244622	0.246094	0.246094	0.246094	0.324111	0.348029	0.492188	0.550282	0.75395	1.10056	2.32164	4.32555
0	0	0.0512398	0.0819604	0.118624	0.159807	0.211083	0.244716	0.246094	0.246094	0.246094	0.325278	0.348029	0.492188	0.550282	0.769701	1.10056	2.36672	4.33032
0	0	0.0516803	0.0820689	0.118683	0.160296	0.211291	0.245822	0.246094	0.246094	0.246094	0.325574	0.348029	0.492188	0.550282	0.778217	1.10558	2.38523	4.33098
0	0	0.0519281	0.0823685	0.119316	0.160357	0.211478	0.246094	0.246094	0.246094	0.246094	0.33282	0.348029	0.492188	0.550282	0.778217	1.1067	2.39912	4.337
0	0	0.0530246	0.0831557	0.119439	0.160972	0.211795	0.246094	0.246094	0.246094	0.246094	0.335212	0.348029	0.492188	0.550282	0.778217	1.11618	2.42268	4.38157
0	0	0.0535757	0.0854092	0.119776	0.161582	0.21227	0.246094	0.246094	0.246094	0.246094	0.336368	0.348029	0.492188	0.550282	0.778217	1.13131	2.44221	4.39314
0	0	0.0537911	0.0864838	0.121079	0.161755	0.212369	0.246094	0.246094	0.246094	0.246094	0.336842	0.348636	0.492188	0.550282	0.778217	1.13195	2.46005	4.40226
0	0	0.0544369	0.087048	0.122786	0.161953	0.213611	0.246094	0.246094	0.246094	0.246094	0.341893	0.348937	0.492188	0.550282	0.778217	1.1687	2.46094	4.41638
0	0	0.0544376	0.0872329	0.122825	0.163359	0.2139	0.246094	0.246094	0.246094	0.246094	0.343133	0.351247	0.492188	0.550282	0.778217	1.17423	2.46094	4.43652
0	0	0.0544892	0.0879909	0.123135	0.16404	0.214062	0.246094	0.246094	0.246094	0.246094	0.343688	0.351906	0.492188	0.550282	0.778217	1.18486	2.46094	4.43652
0	0	0.0547066	0.0882181	0.123479	0.164629	0.214274	0.246094	0.246094	0.246094	0.246094	0.344023	0.35272	0.492188	0.550282	0.778217	1.20362	2.46094	4.43652
0	0	0.0547958	0.0890449	0.124587	0.166424	0.217779	0.246094	0.246094	0.246094	0.246094	0.345706	0.353186	0.492188	0.550282	0.778217	1.21908	2.46094	4.43652
0	0	0.0549425	0.0895749	0.125239	0.166489	0.218683	0.246094	0.246094	0.246094	0.246094	0.348029	0.353882	0.492188	0.550282	0.778217	1.23047	2.46221	4.44295
0	0	0.0550838	0.0906765	0.126451	0.166739	0.219107	0.246094	0.246094	0.246094	0.246094	0.348029	0.35421	0.492188	0.550282	0.778217	1.23047	2.47321	4.52907
0	0	0.0553958	0.0908454	0.126603	0.168223	0.22043	0.246094	0.246094	0.246094	0.246094	0.348029	0.356363	0.492188	0.550282	0.778217	1.23047	2.49795	4.5359
0	0	0.057124	0.0923279	0.127025	0.16839	0.223573	0.246094	0.246094	0.246094	0.246094	0.348029	0.357154	0.492188	0.550282	0.778217	1.23047	2.514	4.57761
0	0	0.0573521	0.0924908	0.127161	0.168404	0.224564	0.246094	0.246094	0.246094	0.246094	0.348029	0.3572	0.492188	0.550282	0.778217	1.23047	2.53369	4.57761
0	0	0.0575266	0.0925406	0.12734	0.168439	0.225056	0.246094	0.246094	0.246094	0.246094	0.348029	0.358737	0.492188	0.550282	0.778217	1.23047	2.53369	4.60307
0	0	0.0577803	0.093029	0.128003	0.169021	0.225527	0.246094	0.246094	0.246094	0.246094	0.348029	0.362129	0.492188	0.550282	0.778217	1.23047	2.56682	4.60632
0	0.00307863	0.0580554	0.0931273	0.128074	0.169953	0.225682	0.246094	0.246094	0.246094	0.246094	0.348029	0.362461	0.492188	0.550282	0.778217	1.23047	2.56929	4.64329
0	0.00379854	0.05882	0.0934213	0.129319	0.170455	0.22614	0.246094	0.246094	0.246094	0.246094	0.348029	0.365673	0.492188	0.550282	0.778217	1.23047	2.56929	4.64329
0	0.00451265	0.0591963	0.0938925	0.130022	0.170728	0.227169	0.246094	0.246094	0.246094	0.246094	0.348029	0.368131	0.492188	0.550282	0.778217	1.23047	2.56929	4.65854
0	0.0062766	0.0596625	0.0943262	0.130913	0.171227	0.227502	0.246094	0.246094	0.246094	0.246094	0.348029	0.368325	0.492188	0.550282	0.778217	1.23047	2.57306	4.66847
0	0.00724202	0.0600373	0.0943469	0.131403	0.171379	0.227611	0.246094	0.246094	0.246094	0.246094	0.348029	0.370187	0.492188	0.550282	0.778217	1.23047	2.57508	4.67484
0	0.00749375	0.0600571	0.0949101	0.133429	0.172514	0.229213	0.246094	0.246094	0.246094	0.246094	0.348029	0.370486	0.492188	0.550282	0.778217	1.25484	2.58093	4.67578
0	0.00936451	0.0610878	0.0949241	0.133685	0.172785	0.229266	0.246094	0.246094	0.246094	0.246094	0.348029	0.381532	0.492188	0.576253	0.778217	1.25484	2.59619	4.68225
0	0.0105827	0.0615629	0.0949458	0.134339	0.172875	0.229574	0.246094	0.246094	0.246094	0.246094	0.348029	0.381701	0.492188	0.576585	0.778217	1.25484	2.59986	4.70184
0	0.0109456	0.0621971	0.0949703	0.134807	0.173755	0.230886	0.246094	0.246094	0.246094	0.248105	0.348029	0.382102	0.492188	0.577518	0.778217	1.25484	2.60312	4.85373
0	0.0145513	0.06359	0.0960436	0.134925	0.174185	0.231262	0.246094	0.246094	0.246094	0.250434	0.348029	0.385741	0.492188	0.57985	0.778217	1.25484	2.61391	4.85373
0	0.0149819	0.063966	0.0964475	0.135508	0.174263	0.232677	0.246094	0.246094	0.246094	0.25051	0.348029	0.385753	0.492188	0.582003	0.785368	1.25484	2.61601	4.8792
0	0.0155643	0.0641018	0.096582	0.136119	0.174634	0.233175	0.246094	0.246094	0.246094	0.251433	0.348029	0.395022	0.492188	0.583302	0.785585	1.25484	2.61601	4.90338
0	0.0155765	0.0641952	0.0966382	0.136575	0.175599	0.234001	0.246094	0.246094	0.246094	0.251995	0.348029	0.395036	0.492188	0.585994	0.809453	1.25484	2.64043	4.90365
0	0.0163426	0.0642189	0.0979077	0.136941	0.175846	0.234525	0.246094	0.246094	0.246094	0.259368	0.348029	0.395293	0.492188	0.587802	0.819007	1.25541	2.64752	4.92188
0	0.0178418	0.0647125	0.0981258	0.137227	0.176183	0.234584	0.246094	0.246094	0.246094	0.260798	0.348029	0.398885	0.492188	0.590607	0.826564	1.28711	2.65051	4.92802
0	0.0215079	0.0652434	0.0985645	0.138406	0.178585	0.235406	0.246094	0.246094	0.246094	0.262057	0.348029	0.399571	0.492188	0.597345	0.827463	1.32526	2.67743	4.92802
0	0.0223908	0.0652636	0.0989154	0.138477	0.178848	0.235989	0.246094	0.246094	0.246094	0.263166	0.348029	0.399579	0.492361	0.601269	0.834895	1.32526	2.70703	4.94642
0	0.0225351	0.065387	0.0991481	0.138516	0.179409	0.236433	0.246094	0.246094	0.246094	0.266353	0.348029	0.401023	0.494918	0.603869	0.839951	1.32526	2.70703	4.98302
0	0.0236676	0.0658559	0.100366	0.138648	0.179691	0.237381	0.246094	0.246094	0.246094	0.267812	0.348029	0.404416	0.497009	0.607906	0.873983	1.32526	2.71819	4.98818
0	0.0239515	0.0669674	0.100658	0.140008	0.181167	0.237456	0.246094	0.246094	0.246094	0.271862	0.348029	0.404585	0.497091	0.617927	0.876423	1.32526	2.7308	5.00093
0	0.0244371	0.0669886	0.101364	0.14004	0.181279	0.238382	0.246094	0.246094	0.246094	0.27545	0.348029	0.406734	0.504606	0.620545	0.876953	1.32526	2.73721	5.04345
0	0.0246696	0.067619	0.101629	0.140599	0.181497	0.238768	0.246094	0.246094	0.246094	0.278225	0.348029	0.409388	0.504621	0.625271	0.884064	1.32526	2.74202	5.07335
0	0.0256413	0.0677295	0.101678	0.140835	0.181857	0.24021	0.246094	0.246094	0.246094	0.278349	0.348029	0.411407	0.509116	0.636033	0.887304	1.32526	2.74422	5.15776
0	0.0265065	0.0679223	0.101929	0.140902	0.182068	0.24046	0.246094	0.246094	0.246094	0.278624	0.348029	0.417667	0.509745	0.636924	0.887304	1.32526	2.74984	5.19135
0	0.0283345	0.0684211	0.102631	0.141196	0.182547	0.241694	0.246094	0.246094	0.246094	0.279733	0.348029	0.424683	0.510274	0.652165	0.887304	1.32526	2.75008	5.19929
0	0.0289163	0.0693553	0.102825	0.142017	0.182932	0.241708	0.246094	0.246094	0.246094	0.280976	0.348029	0.424912	0.510663	0.652317	0.887304	1.33782	2.75141	5.21463
0	0.0301344	0.0699695	0.103248	0.143119	0.184845	0.242108	0.246094	0.246094	0.246094	0.281017	0.348029	0.428826	0.511599	0.662512	0.887304	1.35152	2.75141	5.2464
0	0.0301866	0.0701799	0.103361	0.143651	0.185578	0.242291	0.246094	0.246094	0.246094	0.281304	0.348029	0.431251	0.511732	0.677912	0.887304	1.38049	2.76413	5.28386
0	0.0303716	0.0703618	0.103611	0.143707	0.186539	0.243494	0.246094	0.246094	0.246094	0.28344	0.348029	0.431724	0.515141	0.686621	0.887304	1.39027	2.7703	5.2983
0	0.0303988	0.0705135	0.10491	0.143941	0.187392	0.243684	0.246094	0.246094	0.246094	0.284067	0.348029	0.433138	0.518917	0.687909	0.887304	1.39212	2.77301	5.30102
0	0.0305919	0.0709699	0.105108	0.144312	0.187794	0.244199	0.246094	0.246094	0.246094	0.284162	0.348029	0.436219	0.520075	0.692118	0.887304	1.40434	2.79077	5.30102
0	0.0307403	0.0720305	0.10515	0.14439	0.18832	0.244261	0.246094	0.246094	0.246094	0.285833	0.348029	0.444078	0.520245	0.694722	0.887304	1.43496	2.79156	5.39726
0	0.0316233	0.0721673	0.106355	0.144745	0.188471	0.244379	0.246094	0.246094	0.246094	0.286553	0.348029	0.444803	0.52128	0.696058	0.887304	1.43496	2.79917	5.39726
0	0.031872	0.0725649	0.106436	0.144794	0.190326	0.244864	0.246094	0.246094	0.246094	0.289862	0.348029	0.451289	0.524691	0.696058	0.887304	1.43496	2.79982	5.39726
0	0.0320435	0.0727777	0.106667	0.145932	0.190376	0.244964	0.246094	0.246094	0.246094	0.292912	0.348029	0.453414	0.526226	0.696058	0.887304	1.43496	2.80421	5.40286
0	0.0322498	0.0729734	0.106773	0.146797	0.191642	0.245376	0.246094	0.246094	0.246094	0.293359	0.348029	0.454293	0.527915	0.696058	0.893899	1.43496	2.8059	5.50282
0	0.0326707	0.073279	0.10736	0.146894	0.191696	0.245898	0.246094	0.246094	0.246094	0.295351	0.348029	0.455511	0.529437	0.696058	0.899364	1.43496	2.8059	5.50282
0	0.0332074	0.0740329	0.108456	0.147145	0.191701	0.246007	0.246094	0.246094	0.246094	0.299617	0.348029	0.459587	0.530454	0.696058	0.90706	1.43496	2.83009	5.50282
0	0.0333148	0.0745876	0.108533	0.147805	0.191769	0.246094	0.246094	0.246094	0.246094	0.303155	0.348029	0.461788	0.532232	0.696058	0.920215	1.43496	2.84161	5.54944
0	0.0336683	0.0747908	0.109089	0.148037	0.192954	0.246094	0.246094	0.246094	0.246094	0.304963	0.348029	0.464666	0.53444	0.696058	0.936692	1.43496	2.8567	5.61719
0	0.033811	0.0748392	0.109806	0.148146	0.19408	0.246094	0.246094	0.246094	0.246094	0.306688	0.348029	0.469422	0.535703	0.696058	0.951085	1.43496	2.86357	5.62258
0	0.0339139	0.0757477	0.110518	0.148875	0.194576	0.246094	0.246094	0.246094	0.246094	0.30798	0.348029	0.475131	0.537585	0.696058	0.954144	1.43496	2.86363	5.67
0	0.0342267	0.0757718	0.110914	0.149073	0.195252	0.246094	0.246094	0.246094	0.246094	0.312522	0.348029	0.479054	0.537916	0.696058	0.964658	1.43496	2.86409	5.68694
0	0.034764	0.0759639	0.111565	0.149361	0.196201	0.246094	0.246094	0.246094	0.246094	0.316432	0.348029	0.481177	0.541529	0.696058	0.984375	1.43496	2.88552	5.72399
0	0.0350882	0.0764465	0.112022	0.149774	0.196807	0.246094	0.246094	0.246094	0.246094	0.318973	0.348029	0.481214	0.541768	0.696058	0.984375	1.47656	2.88802	5.72399
0	0.0353254	0.0766503	0.112549	0.150004	0.197448	0.246094	0.246094	0.246094	0.246094	0.320547	0.348029	0.487892	0.549701	0.698834	0.984375	1.47656	2.89693	5.72399
0	0.036998	0.078117	0.114703	0.150533	0.198844	0.246094	0.246094	0.246094	0.246094	0.321581	0.350546	0.489106	0.550282	0.703427	0.984375	1.47656	2.89861	5.77899
0	0.0374265	0.078249	0.114956	0.15151	0.19889	0.246094	0.246094	0.246094	0.246094	0.321887	0.355062	0.490596	0.550282	0.71051	0.984375	1.47656	2.94065	5.84958
0	0.0382143	0.0782858	0.114987	0.151629	0.199002	0.246094	0.246094	0.246094	0.246094	0.323822	0.356091	0.4907	0.550282	0.711709	0.984375	1.49693	2.94794	5.84958
0	0.0386661	0.0783557	0.115829	0.152494	0.199012	0.246094	0.246094	0.246094	0.246094	0.324838	0.361074	0.491289	0.550282	0.711962	0.984375	1.49693	2.96106	5.87025
0	0.0391568	0.0786153	0.117547	0.153019	0.199037	0.246094	0.246094	0.246094	0.246094	0.325177	0.361641	0.492188	0.550282	0.716998	0.984375	1.49693	2.96336	6.03306
0	0.0393692	0.0788089	0.117956	0.153125	0.199268	0.246094	0.246094	0.246094	0.246094	0.32552	0.36458	0.492188	0.550282	0.720948	0.984375	1.51608	2.97356	6.05311
0	0.0395565	0.0789973	0.118145	0.153763	0.199436	0.246094	0.246094	0.246094	0.246094	0.326744	0.366386	0.492188	0.550282	0.722952	0.984375	1.54293	2.97356	6.06424
0	0.0397672	0.0794944	0.118567	0.153782	0.199954	0.246094	0.246094	0.246094	0.246094	0.328485	0.368847	0.492188	0.550282	0.724527	0.984375	1.55643	2.97356	6.09497
0	0.0406852	0.0814472	0.11883	0.153836	0.200405	0.246094	0.246094	0.246094	0.246094	0.329365	0.37147	0.492188	0.550282	0.726497	0.984375	1.55643	2.97356	6.15234
0	0.0408184	0.081691	0.118928	0.15589	0.200601	0.246094	0.246094	0.246094	0.246094	0.329917	0.371594	0.492188	0.550282	0.738281	0.984375	1.56445	2.97356	6.21043
0	0.0412748	0.0819925	0.119483	0.156211	0.200756	0.246094	0.246094	0.246094	0.246094	0.332807	0.371882	0.492188	0.550282	0.738281	0.984375	1.57341	2.97495	6.21113
0	0.0413133	0.0822624	0.119568	0.158032	0.20076	0.246094	0.246094	0.246094	0.246094	0.333306	0.372685	0.492188	0.550282	0.738281	0.984375	1.57577	2.9907	6.30308
0	0.0416331	0.0827581	0.119641	0.15825	0.200856	0.246094	0.246094	0.246094	0.246094	0.335326	0.376661	0.492188	0.550282	0.738281	1.00383	1.57577	2.99297	6.41888
0	0.041854	0.0828094	0.120177	0.158623	0.200941	0.246094	0.246094	0.246094	0.246094	0.3367	0.376969	0.492188	0.550282	0.738281	1.0051	1.57577	2.99464	6.49706
0	0.0431895	0.0836176	0.120704	0.1592	0.201188	0.246094	0.246094	0.246094	0.246094	0.338082	0.376998	0.492188	0.550282	0.738281	1.00814	1.57577	3.00396	6.49706
0	0.0438097	0.0842203	0.121665	0.159667	0.201233	0.246094	0.246094	0.246094	0.246094	0.33853	0.377177	0.492188	0.550282	0.738281	1.01083	1.57577	3.00396	6.59948
0	0.04391	0.0842378	0.121836	0.159975	0.202158	0.246094	0.246094	0.246094	0.246094	0.339334	0.37834	0.492188	0.550282	0.738281	1.01467	1.57577	3.02387	8.14715
0	0.0446078	0.0843068	0.122319	0.160427	0.202251	0.246094	0.246094	0.246094	0.246094	0.341038	0.381613	0.492188	0.550282	0.738281	1.01467	1.57577	3.03144	8.14715
0	0.044982	0.0852935	0.122619	0.160815	0.202666	0.246094	0.246094	0.246094	0.246094	0.341886	0.386635	0.492188	0.550282	0.738281	1.01467	1.58385	3.03154	8.14715
0	0.0453676	0.0860925	0.122929	0.160984	0.202962	0.246094	0.246094	0.246094	0.246094	0.341971	0.390053	0.492188	0.550282	0.738281	1.01467	1.65085	3.03496	8.25424
0	0.045405	0.0865145	0.12303	0.161739	0.203297	0.246094	0.246094	0.246094	0.246094	0.346297	0.390687	0.492188	0.550282	0.738281	1.01467	1.65085	3.03755	11.3364
0	0.0455767	0.08711	0.123587	0.162363	0.203705	0.246094	0.246094	0.246094	0.246094	0.346308	0.39071	0.492188	0.550282	0.738281	1.01467	1.65085	3.03758	11.569
0	0.045663	0.0875433	0.123669	0.16262	0.203822	0.246094	0.246094	0.246094	0.247268	0.347518	0.393372	0.492188	0.550282	0.738281	1.01467	1.66852	3.04328	11.9044
0	0.0464396	0.087571	0.124005	0.164218	0.20412	0.246094	0.246094	0.246094	0.24938	0.347855	0.393546	0.492188	0.550282	0.738281	1.01467	1.72266	3.05033	12.2405
0	0.0470509	0.087861	0.124027	0.164288	0.204133	0.246094	0.246094	0.246094	0.249807	0.348029	0.397583	0.492188	0.550282	0.738281	1.01467	1.72266	3.07013
0	0.047833	0.0882558	0.124658	0.164904	0.204212	0.246094	0.246094	0.246094	0.25417	0.348029	0.398731	0.492188	0.550282	0.738281	1.01467	1.72266	3.07292
0	0.0492802	0.08836	0.124737	0.166066	0.205275	0.246094	0.246094	0.246094	0.255115	0.348029	0.402877	0.492188	0.550282	0.738281	1.01467	1.72266	3.07341
0	0.0500197	0.0884256	0.125027	0.166121	0.205408	0.246094	0.246094	0.246094	0.255221	0.348029	0.40513	0.492188	0.550282	0.738281	1.01467	1.72266	3.08149
0	0.0502288	0.0886638	0.126197	0.166145	0.205503	0.246094	0.246094	0.246094	0.257487	0.348029	0.406516	0.492188	0.550282	0.738281	1.01467	1.72266	3.08355
0	0.0505976	0.089328	0.127035	0.166736	0.206257	0.246094	0.246094	0.246094	0.258543	0.348029	0.409513	0.492188	0.550282	0.738281	1.01467	1.72471	3.08371
0	0.0506107	0.0894084	0.127044	0.166778	0.206365	0.246094	0.246094	0.246094	0.262719	0.348029	0.410618	0.492188	0.550282	0.738281	1.03626	1.72628	3.0971
0	0.0507492	0.0894784	0.127109	0.167875	0.206576	0.246094	0.246094	0.246094	0.263192	0.348029	0.412481	0.492188	0.550282	0.741364	1.04164	1.74015	3.10262
0	0.0507657	0.0895569	0.127472	0.168012	0.206796	0.246094	0.246094	0.246094	0.263785	0.348029	0.414507	0.492188	0.550282	0.750743	1.04409	1.74015	3.10334
0	0.0509866	0.0896478	0.127887	0.168945	0.207277	0.246094	0.246094	0.246094	0.264547	0.348029	0.415844	0.492188	0.550282	0.752381	1.04409	1.74015	3.11025
0	0.051473	0.0897565	0.128311	0.168983	0.207986	0.246094	0.246094	0.246094	0.264809	0.348029	0.419489	0.492188	0.550282	0.758738	1.04409	1.74015	3.11287
0	0.0515227	0.090593	0.128485	0.169604	0.208496	0.246094	0.246094	0.246094	0.265952	0.348029	0.423757	0.492188	0.550282	0.770172	1.04409	1.74015	3.15154
0	0.0516504	0.090937	0.129887	0.16996	0.208564	0.246094	0.246094	0.246094	0.26725	0.348029	0.428619	0.492188	0.550282	0.777482	1.04668	1.77461	3.15154
0	0.0518917	0.0909778	0.130198	0.170106	0.208856	0.246094	0.246094	0.246094	0.268615	0.348029	0.435646	0.492188	0.550282	0.778217	1.04864	1.77461	3.16787
0	0.0521383	0.0910252	0.130256	0.170278	0.210551	0.246094	0.246094	0.246094	0.268889	0.348029	0.438931	0.492188	0.550282	0.778217	1.05226	1.77461	3.17108
0	0.0523077	0.091283	0.13162	0.170669	0.21065	0.246094	0.246094	0.246094	0.269196	0.348029	0.442797	0.492188	0.550282	0.778217	1.0573	1.77461	3.17184
0	0.0523927	0.0913218	0.131823	0.170861	0.211054	0.246094	0.246094	0.246094	0.272233	0.348029	0.444794	0.492188	0.550282	0.778217	1.05961	1.77461	3.17819
0	0.0539059	0.091975	0.132105	0.170996	0.21205	0.246094	0.246094	0.246094	0.273586	0.348029	0.447214	0.492188	0.550282	0.778217	1.06596	1.77626	3.1829
0	0.0540473	0.0921187	0.132574	0.171157	0.212479	0.246094	0.246094	0.246094	0.277039	0.348029	0.448976	0.492188	0.550282	0.778217	1.07533	1.78486	3.19922
0	0.0542307	0.0922921	0.132663	0.171379	0.21254	0.246094	0.246094	0.246094	0.278201	0.348029	0.450582	0.492188	0.55068	0.778217	1.08804	1.79159	3.19922
0	0.0544892	0.0923892	0.133044	0.171524	0.212612	0.246094	0.246094	0.246094	0.278402	0.348029	0.452158	0.492188	0.554654	0.778217	1.10023	1.79159	3.19922
0	0.054738	0.0933193	0.133174	0.171778	0.214117	0.246094	0.246094	0.246094	0.278624	0.348029	0.45323	0.492188	0.555621	0.778217	1.10056	1.79159	3.20344
0	0.0555629	0.0948282	0.133203	0.171856	0.214437	0.246094	0.246094	0.246094	0.278824	0.348029	0.453996	0.492188	0.557028	0.778217	1.10056	1.82616	3.20867
0	0.055812	0.0949537	0.133609	0.172328	0.214885	0.246094	0.246094	0.246094	0.284418	0.348029	0.456425	0.492188	0.558981	0.778217	1.10056	1.82739	3.20867
0	0.0561202	0.0950101	0.133646	0.172543	0.215563	0.246094	0.246094	0.246094	0.286461	0.348029	0.459889	0.492188	0.559007	0.778217	1.10056	1.8374	3.21162
0	0.0562879	0.0955101	0.134096	0.172929	0.215973	0.246094	0.246094	0.246094	0.287227	0.348029	0.461019	0.492188	0.563771	0.778217	1.10056	1.83803	3.21324
0	0.0569847	0.0962093	0.134378	0.173229	0.216012	0.246094	0.246094	0.246094	0.288016	0.348029	0.461614	0.492188	0.567171	0.778217	1.10056	1.87349	3.21331
0	0.0571918	0.0963837	0.13529	0.174088	0.216455	0.246094	0.246094	0.246094	0.289862	0.348029	0.463343	0.492188	0.575102	0.778217	1.10978	1.87377	3.22305
0	0.0588037	0.0965255	0.135452	0.174166	0.217173	0.246094	0.246094	0.246094	0.290202	0.348029	0.467862	0.492188	0.57582	0.778217	1.11833	1.91304	3.23576
0	0.0588829	0.0972024	0.136264	0.174445	0.217215	0.246094	0.246094	0.246094	0.29609	0.348029	0.470326	0.492188	0.588527	0.778217	1.12296	1.92205	3.23686
0	0.0593515	0.097261	0.13652	0.174965	0.217752	0.246094	0.246094	0.246094	0.297424	0.348029	0.470798	0.492188	0.60012	0.778217	1.13723	1.92205	3.23791
0	0.0603921	0.0974718	0.136866	0.175811	0.218431	0.246094	0.246094	0.246094	0.297677	0.348029	0.471548	0.492188	0.600716	0.778217	1.13924	1.92205	3.26386
0	0.0604025	0.0976786	0.137193	0.175843	0.219234	0.246094	0.246094	0.246094	0.298149	0.348029	0.474213	0.492188	0.614429	0.778217	1.14751	1.93053	3.26603
0	0.0606641	0.0979496	0.137204	0.175846	0.21978	0.246094	0.246094	0.246094	0.299185	0.348029	0.480271	0.492188	0.616191	0.778217	1.15502	1.96875	3.26812
0	0.0609093	0.0983336	0.13724	0.176348	0.219856	0.246094	0.246094	0.246094	0.301081	0.348029	0.481322	0.492188	0.617648	0.778217	1.15651	1.96875	3.27431
0	0.0612872	0.0983668	0.13744	0.177142	0.221894	0.246094	0.246094	0.246094	0.30139	0.348029	0.481338	0.492312	0.618624	0.778217	1.18364	1.96875	3.2823
0	0.0614881	0.0989163	0.137616	0.177442	0.22203	0.246094	0.246094	0.246094	0.301408	0.348029	0.486255	0.493095	0.625393	0.778217	1.19617	1.96875	3.2877
0	0.0618768	0.0992958	0.137707	0.177857	0.222108	0.246094	0.246094	0.246094	0.306232	0.348029	0.48842	0.495513	0.626038	0.778217	1.20504	1.98407	3.29788
0	0.0622648	0.0993168	0.137805	0.178844	0.222149	0.246094	0.246094	0.246094	0.306901	0.348029	0.488648	0.495664	0.626545	0.778217	1.21128	1.98889	3.30169
0	0.0631307	0.0993906	0.138353	0.179188	0.22325	0.246094	0.246094	0.246094	0.307032	0.348029	0.489777	0.495953	0.62788	0.778217	1.22392	2.01967	3.30991
0	0.0635792	0.0995057	0.138465	0.179413	0.223294	0.246094	0.246094	0.246094	0.307265	0.348029	0.492188	0.499858	0.63105	0.778639	1.23047	2.02934	3.31085
0	0.0637877	0.0995845	0.138724	0.18014	0.223594	0.246094	0.246094	0.246094	0.307278	0.348029	0.492188	0.499895	0.631237	0.785401	1.23047	2.0297	3.31085
0	0.0638381	0.0996558	0.138783	0.18023	0.225296	0.246094	0.246094	0.246094	0.307498	0.348029	0.492188	0.501908	0.634326	0.785631	1.23047	2.02995	3.31085
0	0.0638757	0.0996604	0.138974	0.180616	0.225528	0.246094	0.246094	0.246094	0.307908	0.348029	0.492188	0.505437	0.635835	0.786113	1.23047	2.04949	3.31085
0	0.0638784	0.0996665	0.140471	0.181189	0.226169	0.246094	0.246094	0.246094	0.308263	0.348029	0.492188	0.508001	0.640253	0.801376	1.23047	2.10146	3.31349
0	0.0641376	0.100552	0.140559	0.181857	0.226622	0.246094	0.246094	0.246094	0.309157	0.348029	0.492188	0.517173	0.644194	0.811019	1.23047	2.10263	3.31499
0	0.0642576	0.101035	0.14064	0.182555	0.22703	0.246094	0.246094	0.246094	0.309822	0.348029	0.492188	0.518936	0.651181	0.81303	1.23047	2.10263	3.32187
0	0.0645667	0.101065	0.141782	0.182596	0.227675	0.246094	0.246094	0.246094	0.309969	0.348029	0.492188	0.529539	0.652134	0.817359	1.23047	2.11698	3.329
0	0.0648776	0.101161	0.141825	0.182885	0.229557	0.246094	0.246094	0.246094	0.310658	0.348029	0.492188	0.532226	0.657289	0.840552	1.23047	2.11698	3.32916
0	0.0657868	0.10145	0.141894	0.183109	0.23021	0.246094	0.246094	0.246094	0.310686	0.348029	0.492188	0.532843	0.657845	0.845064	1.23047	2.11698	3.3296
0	0.065844	0.1016	0.14255	0.184252	0.231279	0.246094	0.246094	0.246094	0.314466	0.348029	0.492188	0.535875	0.660906	0.851459	1.23047	2.11983	3.33431
0	0.0660772	0.101622	0.142873	0.184578	0.231954	0.246094	0.246094	0.246094	0.314845	0.348029	0.492188	0.536615	0.666276	0.857659	1.23047	2.1241	3.34836
0	0.0661896	0.10213	0.143289	0.187471	0.232025	0.246094	0.246094	0.246094	0.315907	0.348029	0.492188	0.538044	0.670624	0.876738	1.23047	2.12931	3.35512
0	0.0662081	0.102279	0.143471	0.187785	0.232064	0.246094	0.246094	0.246094	0.316128	0.348029	0.492188	0.541951	0.67257	0.88394	1.23047	2.13361	3.3678
0	0.0665961	0.10258	0.14376	0.187928	0.232537	0.246094	0.246094	0.246094	0.320058	0.348029	0.492188	0.542104	0.673368	0.887304	1.23047	2.15321	3.38915
0	0.066646	0.102592	0.144401	0.188221	0.233365	0.246094	0.246094	0.246094	0.32034	0.348029	0.492188	0.543487	0.674936	0.887304	1.23592	2.17147	3.39077
0	0.0668913	0.102852	0.14448	0.188415	0.23378	0.246094	0.246094	0.246094	0.320499	0.348029	0.492188	0.545496	0.684852	0.887304	1.25484	2.20584	3.40151
0	0.0669447	0.103613	0.144952	0.188681	0.234126	0.246094	0.246094	0.246094	0.320927	0.348029	0.492188	0.547327	0.686173	0.887304	1.25484	2.21484	3.40267
0	0.0669467	0.104048	0.145037	0.190151	0.234522	0.246094	0.246094	0.246094	0.324476	0.348029	0.492188	0.549851	0.693647	0.887304	1.25484	2.22847	3.41481
0	0.0669866	0.104276	0.145251	0.190165	0.234525	0.246094	0.246094	0.246094	0.324491	0.348029	0.492188	0.550282	0.696058	0.887304	1.25484	2.2457	3.41529
0	0.067218	0.104341	0.145661	0.190251	0.234638	0.246094	0.246094	0.246094	0.324524	0.348029	0.492188	0.550282	0.696058	0.887304	1.25484	2.26546	3.42769
0	0.0680302	0.104627	0.145665	0.190593	0.235457	0.246094	0.246094	0.246094	0.326256	0.350002	0.492188	0.550282	0.696058	0.887304	1.25484	2.26887	3.42769
0	0.0680552	0.10481	0.146903	0.192634	0.236034	0.246094	0.246094	0.246094	0.326883	0.350205	0.492188	0.550282	0.696058	0.887304	1.25484	2.28954	3.42769
0	0.0683494	0.105459	0.147204	0.192659	0.236637	0.246094	0.246094	0.246094	0.326997	0.350882	0.492188	0.550282	0.696058	0.887304	1.25484	2.30098	3.42769
0	0.0684099	0.10597	0.147297	0.192749	0.236874	0.246094	0.246094	0.246094	0.327896	0.350927	0.492188	0.550282	0.696058	0.887304	1.25484	2.32164	3.42769
0	0.0684628	0.106357	0.147502	0.192787	0.237922	0.246094	0.246094	0.246094	0.328728	0.351254	0.492188	0.550282	0.696058	0.887304	1.25484	2.32164	3.42769
0	0.0685971	0.106525	0.147573	0.193753	0.239099	0.246094	0.246094	0.246094	0.329317	0.352618	0.492188	0.550282	0.696058	0.887304	1.25484	2.33149	3.42769
0	0.0686356	0.106646	0.147797	0.194053	0.239673	0.246094	0.246094	0.246094	0.329366	0.353395	0.492188	0.550282	0.696058	0.887304	1.25484	2.33465	3.43711
0	0.0690907	0.107462	0.147897	0.195054	0.239803	0.246094	0.246094	0.246094	0.330803	0.353867	0.492188	0.550282	0.696655	0.903839	1.25484	2.34033	3.44333
0	0.070369	0.107525	0.148138	0.196232	0.24077	0.246094	0.246094	0.246094	0.331545	0.355482	0.492188	0.550282	0.704696	0.905894	1.2653	2.34257	3.44797
0	0.0704281	0.107996	0.148276	0.196363	0.241762	0.246094	0.246094	0.246094	0.333685	0.355662	0.492188	0.550282	0.711629	0.907597	1.26783	2.34909	3.45409
0	0.0704925	0.108225	0.149215	0.196634	0.241971	0.246094	0.246094	0.246094	0.338097	0.356113	0.492188	0.550282	0.722325	0.919683	1.2827	2.35058	3.45409
0	0.070602	0.108671	0.149681	0.197142	0.242211	0.246094	0.246094	0.246094	0.338587	0.357287	0.492188	0.550282	0.738281	0.934489	1.32526	2.35916	3.45955
0	0.0707673	0.108688	0.149794	0.197416	0.243065	0.246094	0.246094	0.246094	0.338647	0.360355	0.492188	0.550282	0.738281	0.936989	1.32526	2.37253	3.4775
0	0.0708913	0.108697	0.14993	0.197449	0.243639	0.246094	0.246094	0.246094	0.340004	0.360445	0.492188	0.550282	0.738281	0.937089	1.32526	2.40408	3.48029
0	0.07116	0.108854	0.15048	0.198129	0.244146	0.246094	0.246094	0.246094	0.340241	0.360643	0.492188	0.550282	0.738281	0.937834	1.32526	2.40757	3.48029
0	0.0725548	0.108951	0.150606	0.198137	0.245961	0.246094	0.246094	0.246094	0.340478	0.360781	0.492188	0.550282	0.738281	0.945406	1.32526	2.42374	3.48821
0	0.0727353	0.109164	0.150995	0.198455	0.246094	0.246094	0.246094	0.246094	0.341417	0.361095	0.492188	0.550282	0.738281	0.959202	1.32526	2.42374	3.49765
0	0.0730235	0.109178	0.151561	0.19878	0.246094	0.246094	0.246094	0.246094	0.344763	0.362095	0.492188	0.550282	0.738281	0.961345	1.32526	2.42374	3.49765
0	0.0731326	0.109668	0.151598	0.199221	0.246094	0.246094	0.246094	0.246094	0.345387	0.365695	0.492188	0.550282	0.738281	0.973928	1.32526	2.42796	3.50503
0	0.0731674	0.109671	0.152113	0.199452	0.246094	0.246094	0.246094	0.246094	0.347607	0.367551	0.492188	0.550282	0.738281	0.975438	1.32526	2.4289	3.52353
0	0.0732703	0.109932	0.153594	0.201421	0.246094	0.246094	0.246094	0.246094	0.348029	0.368799	0.492188	0.550282	0.738281	0.9774	1.32627	2.42899	3.52576
0	0.0733551	0.110186	0.1536	0.202365	0.246094	0.246094	0.246094	0.246094	0.348029	0.37398	0.492188	0.550282	0.738281	0.980767	1.34055	2.44288	3.55536
0	0.073461	0.110622	0.154313	0.203136	0.246094	0.246094	0.246094	0.246094	0.348029	0.377909	0.492188	0.550282	0.738281	0.984375	1.36791	2.44979	3.5589
0	0.0735397	0.110629	0.154697	0.203997	0.246094	0.246094	0.246094	0.246094	0.348029	0.379059	0.492188	0.550282	0.738281	0.984375	1.39212	2.4585	3.563
0	0.0737101	0.110917	0.154704	0.204116	0.246094	0.246094	0.246094	0.246094	0.348029	0.382946	0.492188	0.550282	0.738281	0.984375	1.39212	2.46068	3.56369
0	0.0741018	0.111669	0.155719	0.204444	0.246094	0.246094	0.246094	0.246094	0.348029	0.385178	0.492188	0.550282	0.738281	0.984375	1.39212	2.46094	3.57131
0	0.0742716	0.112497	0.155969	0.204752	0.246094	0.246094	0.246094	0.246094	0.348029	0.394467	0.492188	0.550282	0.738281	0.984375	1.41954	2.46094	3.58357
0	0.0745848	0.112557	0.156511	0.20543	0.246094	0.246094	0.246094	0.246094	0.348029	0.394705	0.492188	0.550282	0.738281	0.984375	1.41975	2.47321	3.58987
0	0.0746212	0.112757	0.156908	0.205461	0.246094	0.246094	0.246094	0.246094	0.348029	0.395776	0.492188	0.550282	0.738281	0.984375	1.43496	2.47321	3.6091
0	0.075159	0.112973	0.158253	0.206126	0.246094	0.246094	0.246094	0.246094	0.348029	0.39916	0.492188	0.550282	0.738281	0.984375	1.43496	2.47321	3.61101
0	0.0752349	0.113064	0.158406	0.206893	0.246094	0.246094	0.246094	0.246094	0.348029	0.40121	0.492188	0.550282	0.738281	0.984375	1.43496	2.47321	3.62745
0	0.0752614	0.113162	0.158702	0.207042	0.246094	0.246094	0.246094	0.246094	0.348029	0.401986	0.492188	0.550282	0.738281	0.984375	1.43496	2.47846	3.63299
0	0.0752874	0.113392	0.158739	0.207724	0.246094	0.246094	0.246094	0.246094	0.348029	0.402143	0.492188	0.550282	0.738281	0.984375	1.43496	2.48367	3.6356
0	0.0752947	0.113413	0.159596	0.207892	0.246094	0.246094	0.246094	0.246094	0.348029	0.404215	0.492188	0.550282	0.738281	0.984375	1.43496	2.48839	3.65456
0	0.075841	0.113828	0.160148	0.208189	0.246094	0.246094	0.246094	0.246094	0.348029	0.404225	0.492188	0.550282	0.738281	0.984375	1.43496	2.49653	3.65845
0	0.0759295	0.115465	0.160217	0.208339	0.246094	0.246094	0.246094	0.246094	0.348029	0.405859	0.492188	0.550282	0.738281	0.984375	1.43496	2.50571	3.65845
0	0.0760052	0.115473	0.160337	0.208826	0.246094	0.246094	0.246094	0.246094	0.348029	0.407214	0.492188	0.550282	0.738281	0.984375	1.43496	2.50967	3.65845
0	0.0761669	0.115516	0.161663	0.209562	0.246094	0.246094	0.246094	0.246094	0.348029	0.407759	0.492188	0.550282	0.738281	0.984375	1.43496	2.50967	3.65845
0	0.0763637	0.11643	0.161752	0.209858	0.246094	0.246094	0.246094	0.246094	0.348029	0.41254	0.492188	0.550282	0.738281	0.984991	1.43496	2.50967	3.65845
0	0.0766376	0.116578	0.161878	0.210504	0.246094	0.246094	0.246094	0.247413	0.348029	0.414099	0.492188	0.550282	0.738281	0.986767	1.43496	2.50967	3.65845
0	0.076953	0.116879	0.162301	0.210937	0.246094	0.246094	0.246094	0.24764	0.348029	0.415115	0.492188	0.550282	0.738281	0.987948	1.43496	2.51041	3.65845
0	0.0770974	0.116993	0.163372	0.211386	0.246094	0.246094	0.246094	0.247737	0.348029	0.420208	0.492188	0.550282	0.738281	0.989864	1.43496	2.52916	3.65845
0	0.0775074	0.117105	0.163581	0.211403	0.246094	0.246094	0.246094	0.248011	0.348029	0.420658	0.492188	0.550282	0.738281	0.992768	1.47656	2.53369	3.66763
0	0.0776605	0.117307	0.163703	0.211564	0.246094	0.246094	0.246094	0.249638	0.348029	0.422788	0.492188	0.550282	0.738281	1.00197	1.47656	2.53369	3.69141
0	0.0781217	0.117416	0.163797	0.211783	0.246094	0.246094	0.246094	0.25017	0.348029	0.423142	0.492188	0.550282	0.738281	1.00333	1.47656	2.54791	3.6996
0	0.0782402	0.118337	0.163822	0.212675	0.246094	0.246094	0.246094	0.250568	0.348029	0.424697	0.492188	0.550282	0.739564	1.01467	1.47656	2.55839	3.6996
0	0.0787028	0.11893	0.163955	0.213907	0.246094	0.246094	0.246094	0.251658	0.348029	0.424807	0.492188	0.550282	0.742661	1.01467	1.47656	2.56929	3.70023
0	0.0788869	0.119202	0.164559	0.214185	0.246094	0.246094	0.246094	0.253339	0.348029	0.424972	0.492188	0.550282	0.745003	1.01467	1.47656	2.5698	3.71153
0	0.0789157	0.119253	0.164677	0.214509	0.246094	0.246094	0.246094	0.253503	0.348029	0.426202	0.492188	0.550282	0.756915	1.01467	1.47656	2.57486	3.71326
0	0.0798111	0.119751	0.164694	0.214628	0.246094	0.246094	0.246094	0.254848	0.348029	0.426586	0.492188	0.550282	0.763791	1.01467	1.4888	2.5829	3.72407
0	0.0803194	0.119851	0.16569	0.215227	0.246094	0.246094	0.246094	0.254984	0.348029	0.427144	0.492188	0.550282	0.768752	1.01467	1.48892	2.58446	3.72407
0	0.0805833	0.120551	0.166293	0.215953	0.246094	0.246094	0.246094	0.255188	0.348029	0.429506	0.492188	0.550282	0.776498	1.01467	1.49113	2.58759	3.72693
0	0.0811834	0.120697	0.166342	0.216299	0.246094	0.246094	0.246094	0.255322	0.348029	0.430335	0.492188	0.550282	0.778217	1.01467	1.49693	2.59442	3.73579
0	0.0812721	0.120959	0.166419	0.216852	0.246094	0.246094	0.246094	0.255818	0.348029	0.435002	0.492188	0.550282	0.778217	1.01467	1.49693	2.59865	3.74149
0	0.081372	0.12104	0.167892	0.217549	0.246094	0.246094	0.246094	0.256363	0.348029	0.435101	0.492188	0.550484	0.778217	1.01467	1.49693	2.60067	3.74483
0	0.0818575	0.121235	0.168055	0.21964	0.246094	0.246094	0.246094	0.256407	0.348029	0.438105	0.492188	0.550595	0.778217	1.01467	1.49693	2.60182	3.75646
0	0.0821445	0.121505	0.168086	0.220653	0.246094	0.246094	0.246094	0.258015	0.348029	0.439586	0.492188	0.552665	0.778217	1.01467	1.49693	2.61378	3.77092
0	0.0821454	0.121571	0.168131	0.22095	0.246094	0.246094	0.246094	0.258868	0.348029	0.439882	0.492188	0.553709	0.778217	1.01467	1.49954	2.61393	3.78818
0	0.082153	0.121637	0.168266	0.221659	0.246094	0.246094	0.246094	0.259125	0.348029	0.440532	0.492188	0.555165	0.778217	1.01467	1.5204	2.61601	3.79275
0	0.0822205	0.12203	0.168559	0.221922	0.246094	0.246094	0.246094	0.260781	0.348029	0.442992	0.492188	0.556155	0.778217	1.01467	1.53936	2.62592	3.82868
0	0.0824988	0.122864	0.168734	0.222392	0.246094	0.246094	0.246094	0.261073	0.348029	0.444933	0.492563	0.557091	0.778217	1.01467	1.55643	2.62979	3.82869
0	0.0825093	0.122886	0.170493	0.222929	0.246094	0.246094	0.246094	0.264001	0.348029	0.447304	0.493601	0.557844	0.778217	1.01467	1.55643	2.63409	3.84411
0	0.0825882	0.122941	0.171811	0.22325	0.246094	0.246094	0.246094	0.264113	0.348029	0.447758	0.493955	0.563386	0.778217	1.01467	1.55643	2.64216	3.84411
0	0.0826686	0.123694	0.171967	0.223444	0.246094	0.246094	0.246094	0.265065	0.348029	0.450488	0.496952	0.563611	0.778217	1.02664	1.55643	2.64332	3.84411
0	0.0827524	0.12531	0.172381	0.224326	0.246094	0.246094	0.246094	0.266698	0.348029	0.453725	0.499298	0.564442	0.778217	1.0321	1.55643	2.65051	3.84411
0	0.0830322	0.125865	0.17341	0.224791	0.246094	0.246094	0.246094	0.266701	0.348029	0.454929	0.501819	0.568211	0.778217	1.0368	1.55643	2.65051	3.85023
0	0.083046	0.126242	0.173612	0.224855	0.246094	0.246094	0.246094	0.271485	0.348029	0.455101	0.502302	0.57176	0.778217	1.0426	1.55643	2.65051	3.8503
0	0.0836455	0.126253	0.173618	0.225626	0.246094	0.246094	0.246094	0.27228	0.348029	0.456773	0.502867	0.57867	0.778217	1.0437	1.55643	2.65051	3.85198
0	0.083805	0.126393	0.17364	0.225824	0.246094	0.246094	0.246094	0.272889	0.348029	0.460227	0.504691	0.581337	0.778217	1.04409	1.55643	2.65321	3.869
0	0.0838061	0.126823	0.173655	0.225878	0.246094	0.246094	0.246094	0.27292	0.348029	0.462871	0.504907	0.585482	0.778217	1.04409	1.55643	2.66018	3.89108
0	0.0839789	0.127273	0.174052	0.226331	0.246094	0.246094	0.246094	0.273767	0.348029	0.464809	0.505173	0.585728	0.778217	1.04409	1.56917	2.66191	3.89108
0	0.0840908	0.127366	0.174267	0.226543	0.246094	0.246094	0.246094	0.274773	0.348029	0.465118	0.50804	0.589282	0.778217	1.04409	1.57577	2.66191	3.90586
0	0.0843971	0.127449	0.174278	0.227638	0.246094	0.246094	0.246094	0.275167	0.348029	0.465735	0.50864	0.589556	0.778217	1.04409	1.57577	2.67098	3.92965
0	0.084775	0.127979	0.17455	0.228148	0.246094	0.246094	0.246094	0.276256	0.348029	0.467824	0.510173	0.590907	0.778217	1.04409	1.57577	2.67173	3.9363
0	0.0851811	0.128069	0.17455	0.230762	0.246094	0.246094	0.246094	0.276869	0.348029	0.468209	0.511549	0.591161	0.778217	1.04583	1.57577	2.68282	3.9375
0	0.0853889	0.12849	0.174855	0.231682	0.246094	0.246094	0.246094	0.277811	0.348029	0.470194	0.513073	0.600197	0.778217	1.07024	1.57577	2.68413	3.9375
0	0.085439	0.12894	0.175372	0.232307	0.246094	0.246094	0.246094	0.278624	0.348029	0.47186	0.515615	0.604278	0.778217	1.08135	1.57577	2.68625	3.9375
0	0.0854457	0.12982	0.175514	0.232427	0.246094	0.246094	0.246094	0.279643	0.348029	0.472568	0.517494	0.605957	0.778217	1.08399	1.60501	2.69253	3.94518
0	0.0855283	0.130598	0.175723	0.232539	0.246094	0.246094	0.246094	0.280592	0.348029	0.474441	0.517528	0.607495	0.778217	1.09013	1.65085	2.72997	3.96477
0	0.0858275	0.130599	0.176059	0.233382	0.246094	0.246094	0.246094	0.281039	0.348029	0.475523	0.517886	0.610421	0.778217	1.09267	1.65085	2.7345	3.97577
0	0.0863523	0.13082	0.176395	0.23341	0.246094	0.246094	0.246094	0.28106	0.348029	0.478657	0.522644	0.610498	0.778217	1.09576	1.65626	2.73648	3.97577
0	0.0863678	0.131048	0.17644	0.233511	0.246094	0.246094	0.246094	0.282795	0.348029	0.491991	0.526329	0.618742	0.778217	1.10056	1.66631	2.73846	3.97577
0	0.086539	0.13154	0.176502	0.234068	0.246094	0.246094	0.246094	0.284394	0.348029	0.492188	0.526629	0.622152	0.778217	1.10056	1.69753	2.74001	3.97577
0	0.0866832	0.131629	0.177144	0.235463	0.246094	0.246094	0.246094	0.284417	0.348029	0.492188	0.530271	0.622499	0.778217	1.10056	1.7158	2.75068	4.00565
0	0.0866985	0.131637	0.177306	0.235969	0.246094	0.246094	0.246094	0.28584	0.348029	0.492188	0.531262	0.6249	0.778217	1.10056	1.72266	2.75141	4.00916
0	0.0869524	0.13185	0.177311	0.23618	0.246094	0.246094	0.246094	0.28722	0.348029	0.492188	0.532651	0.636578	0.778217	1.10056	1.72266	2.75141	4.01042
0	0.0869976	0.132796	0.177746	0.236262	0.246094	0.246094	0.246094	0.287248	0.348029	0.492188	0.534206	0.643557	0.778217	1.10056	1.72266	2.75141	4.01548
0	0.0871528	0.132813	0.178291	0.237727	0.246094	0.246094	0.246094	0.287675	0.348029	0.492188	0.536106	0.645197	0.778217	1.10056	1.72266	2.75141	4.02342
0	0.0879816	0.133093	0.178479	0.239302	0.246094	0.246094	0.246094	0.288626	0.348029	0.492188	0.542645	0.652265	0.778217	1.10056	1.72266	2.75141	4.02491
0	0.0883388	0.133552	0.179135	0.240274	0.246094	0.246094	0.246094	0.288887	0.348029	0.492188	0.543948	0.656182	0.778337	1.10056	1.72266	2.75141	4.02766
0	0.0887171	0.133558	0.17927	0.240546	0.246094	0.246094	0.246094	0.288916	0.348029	0.492188	0.546622	0.658378	0.783246	1.10056	1.73291	2.75141	4.03098
0	0.0888956	0.134299	0.179781	0.241238	0.246094	0.246094	0.246094	0.289577	0.348029	0.492188	0.54673	0.663208	0.784135	1.10056	1.7367	2.75141	4.05687
0	0.0893846	0.134578	0.180549	0.242113	0.246094	0.246094	0.246094	0.289842	0.348029	0.492188	0.548486	0.666095	0.786796	1.10056	1.74015	2.75141	4.07358
0	0.0894561	0.134696	0.180559	0.242485	0.246094	0.246094	0.246094	0.290388	0.348029	0.492188	0.550282	0.66722	0.787019	1.10056	1.74015	2.75141	4.07358
0	0.089537	0.134905	0.180669	0.243661	0.246094	0.246094	0.246094	0.291723	0.348029	0.492188	0.550282	0.672366	0.788431	1.10056	1.74015	2.75141	4.07358
0	0.0897201	0.135314	0.180889	0.243963	0.246094	0.246094	0.246094	0.291901	0.348029	0.492188	0.550282	0.678376	0.790605	1.10056	1.74015	2.75141	4.07358
0	0.0901601	0.135578	0.181059	0.244965	0.246094	0.246094	0.246094	0.29336	0.348029	0.492188	0.550282	0.679123	0.800116	1.10056	1.74015	2.75141	4.07595
0	0.0903151	0.135651	0.181371	0.246043	0.246094	0.246094	0.246094	0.29399	0.348029	0.492188	0.550282	0.681041	0.809612	1.10184	1.74015	2.77075	4.09582
0	0.0904636	0.136363	0.181392	0.246094	0.246094	0.246094	0.246094	0.29479	0.348029	0.492188	0.550282	0.684445	0.811581	1.11056	1.74015	2.7918	4.09582
0	0.0908804	0.136578	0.181475	0.246094	0.246094	0.246094	0.246094	0.299251	0.348029	0.492188	0.550282	0.687726	0.813749	1.11415	1.74015	2.79431	4.10506
0	0.0911896	0.136822	0.182231	0.246094	0.246094	0.246094	0.246094	0.303223	0.348029	0.492188	0.550282	0.689628	0.814003	1.14284	1.7438	2.79846	4.10535
0	0.0911918	0.136954	0.183271	0.246094	0.246094	0.246094	0.246094	0.303931	0.348029	0.492188	0.550282	0.6919	0.820459	1.14538	1.7577	2.80166	4.12201
0	0.09128	0.137008	0.183451	0.246094	0.246094	0.246094	0.246094	0.305303	0.348558	0.492188	0.550282	0.696058	0.820843	1.14606	1.76162	2.8031	4.12345
0	0.0913802	0.137247	0.184115	0.246094	0.246094	0.246094	0.246094	0.305516	0.349099	0.492188	0.550282	0.696058	0.825253	1.15189	1.77461	2.8059	4.12528
0	0.0914603	0.13743	0.184298	0.246094	0.246094	0.246094	0.246094	0.306062	0.350927	0.492188	0.550282	0.696058	0.83086	1.16597	1.79159	2.8059	4.12528
0	0.0915795	0.138159	0.185332	0.246094	0.246094	0.246094	0.246094	0.306121	0.350987	0.492188	0.550282	0.696058	0.832543	1.17164	1.79159	2.8059	4.12528
0	0.0916424	0.13847	0.185883	0.246094	0.246094	0.246094	0.246094	0.306792	0.358705	0.492188	0.550282	0.696058	0.848739	1.18048	1.79674	2.80728	4.12528
0	0.0918449	0.138581	0.185993	0.246094	0.246094	0.246094	0.246094	0.307238	0.360162	0.492188	0.550282	0.696058	0.851634	1.18099	1.79752	2.8121	4.17113
0	0.0918812	0.138741	0.186249	0.246094	0.246094	0.246094	0.246094	0.308213	0.360795	0.492188	0.550282	0.696058	0.85165	1.19135	1.7993	2.81802	4.17241
0	0.0927702	0.138833	0.186266	0.246094	0.246094	0.246094	0.246094	0.308409	0.361411	0.492188	0.550282	0.696058	0.856109	1.19473	1.81032	2.82581	4.18067
0	0.0928123	0.13906	0.186704	0.246094	0.246094	0.246094	0.246094	0.308413	0.362595	0.492188	0.550282	0.696058	0.858275	1.20082	1.81078	2.83979	4.18068
0	0.0928189	0.139192	0.186714	0.246094	0.246094	0.246094	0.246094	0.308438	0.364822	0.492188	0.550282	0.696058	0.858864	1.20828	1.8137	2.84469	4.18359
0	0.0932679	0.139376	0.187003	0.246094	0.246094	0.246094	0.246857	0.308528	0.364906	0.492188	0.550282	0.696058	0.872649	1.21526	1.8143	2.85453	4.18359
0	0.0934379	0.139475	0.187418	0.246094	0.246094	0.246094	0.24712	0.308694	0.366263	0.492188	0.550282	0.696058	0.876793	1.23047	1.81629	2.86115	4.18359
0	0.0935176	0.139576	0.187811	0.246094	0.246094	0.246094	0.247924	0.309289	0.366538	0.492188	0.550282	0.696058	0.877624	1.23047	1.85401	2.86553	4.18374
0	0.0935753	0.140125	0.188676	0.246094	0.246094	0.246094	0.24809	0.311163	0.374272	0.492188	0.550282	0.696058	0.879412	1.23047	1.87004	2.86992	4.18716
0	0.0941389	0.140201	0.188825	0.246094	0.246094	0.246094	0.248303	0.311317	0.374289	0.492188	0.550282	0.696058	0.879743	1.23047	1.87155	2.86992	4.19083
0	0.0946768	0.140217	0.189783	0.246094	0.246094	0.246094	0.248358	0.315676	0.375474	0.492188	0.550282	0.696058	0.883276	1.23047	1.87419	2.86992	4.19083
0	0.0951393	0.140688	0.189856	0.246094	0.246094	0.246094	0.248693	0.317602	0.377047	0.492188	0.550282	0.696058	0.885848	1.23047	1.87419	2.87119	4.19083
0	0.0953277	0.1409	0.190409	0.246094	0.246094	0.246094	0.249746	0.318946	0.37781	0.492188	0.550282	0.696058	0.885935	1.23047	1.87419	2.87851	4.194
0	0.0954404	0.140901	0.190454	0.246094	0.246094	0.246094	0.251317	0.320321	0.377839	0.492188	0.550282	0.696058	0.886032	1.23047	1.87419	2.88045	4.19681
0	0.0955707	0.140954	0.190729	0.246094	0.246094	0.246094	0.251744	0.322125	0.380191	0.492188	0.550282	0.69731	0.887304	1.23047	1.88772	2.88045	4.20525
0	0.0956677	0.141745	0.190777	0.246094	0.246094	0.246094	0.252324	0.322287	0.380643	0.492188	0.550282	0.699653	0.887304	1.23047	1.89264	2.88091	4.20525
0	0.0958298	0.142258	0.192114	0.246094	0.246094	0.246094	0.252972	0.324294	0.381489	0.492188	0.550282	0.699928	0.887304	1.23047	1.91828	2.88193	4.21533
0	0.0971171	0.142282	0.192127	0.246094	0.246094	0.246094	0.252976	0.324472	0.383053	0.492188	0.550282	0.716334	0.887304	1.23047	1.92205	2.88694	4.23137
0	0.0971342	0.142301	0.192444	0.246094	0.246094	0.246094	0.253357	0.327569	0.383107	0.492188	0.550282	0.722933	0.887304	1.23047	1.92205	2.89064	4.23396
0	0.097302	0.142339	0.192873	0.246094	0.246094	0.246094	0.253707	0.328464	0.384202	0.492188	0.550282	0.723454	0.887304	1.23047	1.94207	2.89483	4.23396
0	0.0973024	0.142421	0.193164	0.246094	0.246094	0.246094	0.254762	0.329663	0.386395	0.492188	0.550282	0.725233	0.887304	1.23047	1.94837	2.89716	4.23396
0	0.0978532	0.142847	0.193242	0.246094	0.246094	0.246094	0.254766	0.330546	0.391635	0.492188	0.550282	0.726873	0.887304	1.23047	1.96054	2.8996	4.23396
0	0.0980464	0.142974	0.193821	0.246094	0.246094	0.246094	0.255081	0.330691	0.39493	0.492188	0.550282	0.728016	0.887304	1.23047	1.96875	2.90632	4.23396
0	0.0980631	0.143092	0.195314	0.246094	0.246094	0.246094	0.256281	0.333171	0.395489	0.492188	0.550282	0.728876	0.887304	1.23047	1.96875	2.91538	4.23396
0	0.098065	0.143557	0.195883	0.246094	0.246094	0.246094	0.256624	0.333192	0.397435	0.492188	0.550282	0.73392	0.887304	1.23047	1.96875	2.91704	4.25057
0	0.098131	0.143561	0.196114	0.246094	0.246094	0.246094	0.256756	0.337304	0.398863	0.492188	0.550282	0.738281	0.887304	1.23047	1.96875	2.9209	4.25471
0	0.0982306	0.143634	0.196219	0.246094	0.246094	0.246094	0.25694	0.338792	0.40184	0.492188	0.550282	0.738281	0.887304	1.23047	1.96875	2.9235	4.26415
0	0.0985305	0.143891	0.198461	0.246094	0.246094	0.246094	0.259358	0.338972	0.402399	0.492188	0.550282	0.738281	0.887304	1.23047	1.96875	2.93415	4.29784
0	0.0986275	0.144174	0.19847	0.246094	0.246094	0.246094	0.260528	0.340634	0.402833	0.492188	0.550282	0.738281	0.887304	1.23047	1.96908	2.93709	4.29784
0	0.0988773	0.14429	0.198656	0.246094	0.246094	0.246094	0.260529	0.340644	0.403098	0.492188	0.550282	0.738281	0.887304	1.23047	1.97432	2.94243	4.30344
0	0.0988864	0.144304	0.199499	0.246094	0.246094	0.246094	0.262133	0.341762	0.403963	0.492188	0.550282	0.738281	0.887304	1.23047	1.97758	2.95214	4.30488
0	0.0993869	0.145129	0.199703	0.246094	0.246094	0.246094	0.263035	0.342855	0.405861	0.492188	0.550282	0.738281	0.887304	1.23047	1.98407	2.96336	4.30632
0	0.099588	0.145414	0.199905	0.246094	0.246094	0.246094	0.263256	0.344562	0.40725	0.492188	0.550282	0.738281	0.888408	1.24096	1.98407	2.96968	4.32938
0	0.100581	0.145558	0.200036	0.246094	0.246094	0.246094	0.264129	0.344631	0.407521	0.492188	0.550282	0.738281	0.889373	1.25184	1.98407	2.97106	4.3528
0	0.101295	0.145968	0.200318	0.246094	0.246094	0.246094	0.264166	0.345609	0.409905	0.492188	0.550282	0.738281	0.891157	1.25484	1.98407	2.97355	4.35422
0	0.102253	0.146113	0.20048	0.246094	0.246094	0.246094	0.265601	0.346021	0.410528	0.492188	0.550282	0.738281	0.89329	1.25484	2.00811	2.97356	4.36079
0	0.102324	0.146339	0.200549	0.246094	0.246094	0.246094	0.266324	0.346787	0.411428	0.492188	0.550282	0.738281	0.895362	1.25484	2.0124	2.97356	4.36846
0	0.102327	0.146459	0.200647	0.246094	0.246094	0.246094	0.266496	0.348029	0.413084	0.492188	0.550282	0.738281	0.898801	1.25484	2.01746	2.97356	4.38053
0	0.102342	0.146844	0.201541	0.246094	0.246094	0.246094	0.266588	0.348029	0.414402	0.492188	0.550282	0.738281	0.90115	1.25484	2.0246	2.97356	4.38157
0	0.102435	0.146868	0.201802	0.246094	0.246094	0.246094	0.267336	0.348029	0.418789	0.492188	0.550282	0.738281	0.901309	1.25484	2.02934	2.97356	4.38219
0	0.102766	0.146887	0.201828	0.246094	0.246094	0.246094	0.268044	0.348029	0.420324	0.492188	0.550282	0.738281	0.905969	1.25484	2.03732	2.97924	4.39145
0	0.103401	0.14738	0.202141	0.246094	0.246094	0.246094	0.270803	0.348029	0.421285	0.492188	0.550282	0.738281	0.907836	1.25484	2.03945	2.99027	4.39883
0	0.103967	0.147466	0.202204	0.246094	0.246094	0.246094	0.271274	0.348029	0.423127	0.492188	0.550282	0.738281	0.916338	1.25484	2.04592	2.99162	4.40226
0	0.104005	0.148313	0.202735	0.246094	0.246094	0.246094	0.27134	0.348029	0.423148	0.494056	0.550282	0.738281	0.928569	1.25484	2.0465	2.99257	4.40226
0	0.10431	0.148579	0.203018	0.246094	0.246094	0.246094	0.271997	0.348029	0.425468	0.497615	0.550282	0.738281	0.930137	1.25484	2.04997	2.99281	4.40603
0	0.104371	0.148758	0.203742	0.246094	0.246094	0.246094	0.272241	0.348029	0.425865	0.504539	0.550282	0.738281	0.931606	1.25484	2.06591	2.99369	4.43652
0	0.104637	0.148863	0.20396	0.246094	0.246094	0.246094	0.273398	0.348029	0.426052	0.505328	0.550282	0.738281	0.936627	1.25484	2.07841	2.99386	4.43652
0	0.10489	0.149097	0.205265	0.246094	0.246094	0.246094	0.273441	0.348029	0.426125	0.509887	0.550282	0.738281	0.939029	1.25484	2.08817	2.99386	4.43652
0	0.105186	0.149275	0.205414	0.246094	0.246094	0.246094	0.279843	0.348029	0.42679	0.511227	0.550282	0.738281	0.939367	1.25484	2.08817	2.99529	4.43652
0	0.105376	0.149313	0.205576	0.246094	0.246094	0.246094	0.281194	0.348029	0.42856	0.51189	0.550282	0.738281	0.939889	1.25484	2.10263	2.99882	4.43652
0	0.106095	0.149356	0.205585	0.246094	0.246094	0.246094	0.281313	0.348029	0.429736	0.51217	0.550282	0.738281	0.952094	1.25658	2.10263	3.00096	4.43652
0	0.106183	0.149356	0.205803	0.246094	0.246094	0.246094	0.283428	0.348029	0.430063	0.512205	0.550282	0.738281	0.959797	1.2592	2.10526	3.00273	4.45695
0	0.106974	0.149735	0.206115	0.246094	0.246094	0.246094	0.283599	0.348029	0.430579	0.515038	0.550282	0.738281	0.967693	1.26958	2.11698	3.00326	4.54615
0	0.107163	0.149885	0.206126	0.246094	0.246094	0.246094	0.283658	0.348029	0.434488	0.51585	0.550282	0.738281	0.971995	1.27179	2.11698	3.00396	4.55778
0	0.107334	0.150201	0.206361	0.246094	0.246094	0.246094	0.286038	0.348029	0.434575	0.518603	0.550282	0.738281	0.975013	1.27572	2.11698	3.00396	4.57551
0	0.107387	0.15051	0.206409	0.246094	0.246094	0.246094	0.28814	0.348029	0.436311	0.520031	0.550282	0.738281	0.984375	1.28133	2.11698	3.00396	4.58226
0	0.1076	0.150869	0.207091	0.246094	0.246094	0.246094	0.289191	0.348029	0.437947	0.520173	0.550282	0.738281	0.984375	1.29204	2.11698	3.00814	4.58604
0	0.107613	0.15115	0.207096	0.246094	0.246094	0.246094	0.29153	0.348029	0.440785	0.520571	0.55151	0.738281	0.984375	1.29423	2.11698	3.01267	4.59953
0	0.107638	0.151599	0.207638	0.246094	0.246094	0.246094	0.291726	0.348029	0.441134	0.525978	0.552785	0.738281	0.984375	1.29717	2.11698	3.01423	4.62368
0	0.108172	0.1523	0.208801	0.246094	0.246094	0.246094	0.291992	0.348029	0.442705	0.529126	0.557271	0.738281	0.984375	1.30358	2.11698	3.021	4.64329
0	0.108461	0.152971	0.209183	0.246094	0.246094	0.246094	0.292026	0.348029	0.4436	0.529839	0.558568	0.738281	0.984375	1.30384	2.14779	3.02148	4.6693
0	0.108809	0.15356	0.209713	0.246094	0.246094	0.246094	0.292076	0.348029	0.445247	0.530981	0.562054	0.738281	0.984375	1.31119	2.16066	3.03115	4.6693
0	0.10904	0.154028	0.210166	0.246094	0.246094	0.246094	0.294026	0.348029	0.446055	0.533252	0.564075	0.743104	0.984375	1.32409	2.17687	3.03471	4.67578
0	0.109146	0.154085	0.210539	0.246094	0.246094	0.246094	0.294661	0.348029	0.449827	0.535877	0.564262	0.747093	0.984375	1.32526	2.19971	3.03924	4.67578
0	0.109253	0.154751	0.210722	0.246094	0.246094	0.246094	0.295918	0.348029	0.452292	0.53595	0.56678	0.750917	0.984375	1.32526	2.20113	3.04533	4.68225
0	0.109549	0.15497	0.211681	0.246094	0.246094	0.246094	0.297571	0.348029	0.454314	0.536112	0.571873	0.751419	0.984375	1.32526	2.21017	3.04791	4.69418
0	0.10962	0.154974	0.211805	0.246094	0.246094	0.246094	0.297614	0.348029	0.456593	0.537594	0.57278	0.75458	0.984375	1.32526	2.21484	3.06465	4.70161
0	0.109633	0.155911	0.211815	0.246094	0.246094	0.246094	0.299212	0.348029	0.456778	0.53958	0.575085	0.764912	0.984375	1.32526	2.21484	3.07262	4.7198
0	0.109699	0.156031	0.21199	0.246094	0.246094	0.246094	0.299404	0.348029	0.457005	0.541266	0.579063	0.778217	0.984375	1.32526	2.22299	3.07652	4.73371
0	0.109721	0.156141	0.21258	0.246094	0.246094	0.246094	0.299633	0.348029	0.458823	0.541729	0.58524	0.778217	0.984375	1.32526	2.22847	3.08085	4.73371
0	0.109921	0.156976	0.212877	0.246094	0.246094	0.246094	0.300127	0.348029	0.459597	0.54227	0.587429	0.778217	0.984375	1.32526	2.22847	3.08355	4.73371
0	0.110056	0.157424	0.213618	0.246094	0.246094	0.246094	0.300893	0.348029	0.460643	0.542841	0.587826	0.778217	0.984375	1.32526	2.22925	3.08355	4.73371
0	0.110393	0.158942	0.213718	0.246094	0.246094	0.246094	0.301335	0.348029	0.461374	0.54785	0.589282	0.778217	0.984375	1.32526	2.22991	3.08805	4.77542
0	0.110756	0.159559	0.213796	0.246094	0.246094	0.246094	0.302321	0.348029	0.462205	0.548121	0.590684	0.778217	0.984375	1.32526	2.23331	3.08816	4.79321
0	0.111078	0.159595	0.213929	0.246094	0.246094	0.246094	0.302442	0.348029	0.464676	0.549423	0.596391	0.778217	0.984375	1.32526	2.23675	3.09132	4.83498
0	0.111273	0.159757	0.213945	0.246094	0.246094	0.246094	0.303649	0.348029	0.465111	0.549998	0.597657	0.778217	0.984375	1.32526	2.24047	3.09157	4.84748
0	0.111358	0.160111	0.214192	0.246094	0.246094	0.246094	0.303716	0.348029	0.467275	0.550282	0.598856	0.778217	0.984375	1.35862	2.25837	3.09406	4.8859
0	0.111518	0.161408	0.214712	0.246094	0.246094	0.246094	0.303926	0.348029	0.467436	0.550282	0.606456	0.778217	0.984375	1.36371	2.26887	3.09432	4.90338
0	0.111737	0.161729	0.215557	0.246094	0.246094	0.246094	0.304081	0.348029	0.47069	0.550282	0.611317	0.778217	0.984375	1.36501	2.26887	3.09473	4.90338
0	0.112234	0.161884	0.215796	0.246094	0.246094	0.246094	0.308179	0.348029	0.472581	0.550282	0.611487	0.778217	0.984375	1.36901	2.28154	3.09791	4.90338
0	0.112284	0.162592	0.216707	0.246094	0.246094	0.246094	0.310928	0.348029	0.477035	0.550282	0.614713	0.778217	0.986004	1.37133	2.28289	3.11287	4.92106
0	0.112329	0.162942	0.216952	0.246094	0.246094	0.246094	0.312135	0.348029	0.479192	0.550282	0.616165	0.778217	0.986908	1.39212	2.28765	3.11336	4.95254
0	0.112513	0.163078	0.217298	0.246094	0.246094	0.246094	0.314639	0.348029	0.479831	0.550282	0.616255	0.778217	0.990878	1.39212	2.29539	3.11893	4.98302
0	0.11318	0.163387	0.217432	0.246094	0.246094	0.246094	0.317435	0.348029	0.483004	0.550282	0.616353	0.778217	0.991564	1.39212	2.3044	3.12227	4.98302
0	0.113311	0.163576	0.217514	0.246094	0.246094	0.246462	0.318003	0.348029	0.483375	0.550282	0.616471	0.778217	0.998508	1.39212	2.31125	3.13562	5.06738
0	0.113887	0.163933	0.217697	0.246094	0.246094	0.249192	0.318448	0.348029	0.483808	0.550282	0.616656	0.778217	1.00741	1.39212	2.31372	3.14074	5.06738
0	0.114299	0.16419	0.217975	0.246094	0.246094	0.249862	0.319943	0.348029	0.485009	0.550282	0.619201	0.778217	1.01467	1.39396	2.31416	3.14132	5.07335
0	0.11476	0.164361	0.218478	0.246094	0.246094	0.250017	0.320009	0.348029	0.485874	0.550282	0.619545	0.778217	1.01467	1.3949	2.317	3.14406	5.09524
0	0.114872	0.164735	0.218832	0.246094	0.246094	0.250218	0.320018	0.348029	0.492188	0.550282	0.635059	0.778217	1.01467	1.39922	2.32164	3.14429	5.10855
0	0.114886	0.164825	0.218949	0.246094	0.246094	0.250554	0.320708	0.348029	0.492188	0.550282	0.635982	0.778217	1.01467	1.39954	2.32164	3.14588	5.12088
0	0.115017	0.164938	0.220169	0.246094	0.246094	0.252445	0.321977	0.348029	0.492188	0.550282	0.636094	0.778217	1.01467	1.41304	2.32164	3.14589	5.13859
0	0.115609	0.165189	0.22038	0.246094	0.246094	0.252484	0.324039	0.348029	0.492188	0.550282	0.639032	0.778217	1.01467	1.42598	2.32164	3.14719	5.17382
0	0.11633	0.165702	0.221116	0.246094	0.246094	0.254461	0.324213	0.348029	0.492188	0.550282	0.640402	0.778217	1.01467	1.43245	2.32164	3.15062	5.17382
0	0.116663	0.166296	0.221521	0.246094	0.246094	0.255081	0.324848	0.348029	0.492188	0.550282	0.643142	0.778217	1.01467	1.4329	2.32164	3.15154	5.19135
0	0.116985	0.166403	0.222246	0.246094	0.246094	0.255594	0.325102	0.348029	0.492188	0.550282	0.643343	0.778217	1.01467	1.43496	2.32818	3.15154	5.19135
0	0.117501	0.166595	0.222699	0.246094	0.246094	0.25592	0.325461	0.348029	0.492188	0.550282	0.643429	0.778217	1.01467	1.43496	2.32952	3.16237	5.28386
0	0.117855	0.166626	0.222712	0.246094	0.246094	0.256463	0.327003	0.348029	0.492188	0.550282	0.645127	0.778217	1.01467	1.43496	2.33465	3.16497	5.28386
0	0.117995	0.166784	0.223184	0.246094	0.246094	0.258486	0.327911	0.348029	0.492188	0.550282	0.645238	0.778217	1.01467	1.43496	2.33869	3.17008	5.28386
0	0.118118	0.167013	0.22326	0.246094	0.246094	0.258947	0.330401	0.348029	0.492188	0.550282	0.650317	0.778217	1.01467	1.43496	2.33895	3.17604	5.30102
0	0.118295	0.167494	0.223553	0.246094	0.246094	0.259019	0.330464	0.348029	0.492188	0.550282	0.651213	0.778217	1.01467	1.43496	2.35478	3.18513	5.37477
0	0.119049	0.167872	0.223629	0.246094	0.246094	0.259217	0.333339	0.348029	0.492188	0.550282	0.653794	0.783636	1.01467	1.43496	2.3846	3.19382	5.37477
0	0.119104	0.167996	0.223692	0.246094	0.246094	0.259644	0.333409	0.348029	0.492188	0.550282	0.654216	0.785641	1.01467	1.43496	2.38771	3.19922	5.39726
0	0.119372	0.169251	0.223718	0.246094	0.246094	0.260564	0.333553	0.348029	0.492188	0.550282	0.657042	0.786639	1.01467	1.43496	2.38895	3.19922	5.39726
0	0.119761	0.169916	0.224429	0.246094	0.246094	0.26224	0.33461	0.348029	0.492188	0.550282	0.659686	0.790021	1.01467	1.43496	2.40706	3.19922	5.40286
0	0.120168	0.170032	0.224467	0.246094	0.246094	0.263524	0.334913	0.348029	0.492188	0.550282	0.661659	0.793838	1.01467	1.43496	2.4193	3.19922	5.40286
0	0.120182	0.170388	0.224896	0.246094	0.246094	0.264385	0.336297	0.348029	0.492188	0.550282	0.6696	0.798008	1.02	1.43599	2.42374	3.20145	5.40704
0	0.120368	0.170766	0.225411	0.246094	0.246094	0.265148	0.336525	0.348029	0.492188	0.550282	0.671896	0.803022	1.02954	1.45639	2.42374	3.20501	5.40727
0	0.120386	0.170789	0.225579	0.246094	0.246094	0.265748	0.338647	0.348029	0.492188	0.550282	0.678201	0.80849	1.03176	1.4659	2.42374	3.20849	5.46417
0	0.120553	0.171205	0.227201	0.246094	0.246094	0.266523	0.338706	0.348029	0.492188	0.550282	0.67917	0.809568	1.03933	1.47656	2.42431	3.20867	5.50282
0	0.121113	0.171768	0.227582	0.246094	0.246094	0.266716	0.339174	0.348029	0.492188	0.550282	0.682796	0.810067	1.04409	1.47656	2.42945	3.20867	5.50282
0	0.1212	0.17187	0.22761	0.246094	0.246094	0.266983	0.339581	0.348029	0.492188	0.550282	0.686771	0.811395	1.04409	1.47656	2.43156	3.20867	5.50282
0	0.121656	0.172696	0.227818	0.246094	0.246094	0.267341	0.339747	0.348029	0.492188	0.550282	0.695308	0.818531	1.04409	1.47656	2.44011	3.20871	5.50282
0	0.121708	0.17271	0.228462	0.246094	0.246094	0.267943	0.340237	0.348029	0.492188	0.550282	0.696058	0.822845	1.04409	1.47656	2.44049	3.217	5.53538
0	0.122415	0.172933	0.228664	0.246094	0.246094	0.268235	0.34068	0.348029	0.492188	0.550282	0.696058	0.824596	1.04473	1.48324	2.44248	3.23686	5.55213
0	0.12266	0.173016	0.229212	0.246094	0.246094	0.268905	0.341962	0.348029	0.492188	0.550282	0.696058	0.831899	1.04522	1.49693	2.44763	3.23957	5.6118
0	0.122683	0.173189	0.229433	0.246094	0.246094	0.269009	0.342325	0.348029	0.492188	0.550282	0.696058	0.837335	1.06227	1.49693	2.45463	3.24541	5.61719
0	0.122955	0.173331	0.229671	0.246094	0.246094	0.269345	0.343379	0.348029	0.492188	0.550282	0.696058	0.838093	1.06396	1.49693	2.46094	3.24628	5.61846
0	0.123185	0.173612	0.229929	0.246094	0.246094	0.269803	0.343583	0.348029	0.492188	0.550282	0.696058	0.83983	1.06469	1.49693	2.46688	3.25187	5.6655
0	0.123515	0.173672	0.229956	0.246094	0.246094	0.269878	0.343762	0.348029	0.492188	0.550282	0.696058	0.846639	1.0767	1.49693	2.47197	3.25461	5.72399
0	0.123597	0.173895	0.230011	0.246094	0.246094	0.270837	0.344288	0.348029	0.492188	0.550282	0.696058	0.850866	1.08278	1.49693	2.47211	3.26347	5.72681
0	0.123825	0.173923	0.231139	0.246094	0.246094	0.271709	0.344458	0.348029	0.492188	0.550282	0.696058	0.851416	1.08362	1.49693	2.47321	3.26514	5.81422
0	0.123975	0.17426	0.231366	0.246094	0.246094	0.272457	0.345983	0.348029	0.492188	0.550282	0.696058	0.852834	1.09224	1.49693	2.47321	3.27588	5.84958
0	0.124237	0.174272	0.23145	0.246094	0.246094	0.272882	0.347905	0.348029	0.492188	0.550282	0.696058	0.857957	1.09776	1.51048	2.4777	3.28441	5.86448
0	0.125003	0.174285	0.231512	0.246094	0.246094	0.273792	0.348029	0.348029	0.492188	0.550282	0.696058	0.858379	1.0987	1.51812	2.4897	3.28543	5.92429
0	0.125069	0.174337	0.232215	0.246094	0.246094	0.274221	0.348029	0.348029	0.492188	0.550282	0.696058	0.860183	1.10056	1.55236	2.49249	3.29216	5.9573
0	0.125078	0.174492	0.232446	0.246094	0.246094	0.276228	0.348029	0.348029	0.492188	0.550282	0.696058	0.862855	1.10056	1.55643	2.49305	3.29804	5.98647
0	0.125681	0.17488	0.232494	0.246094	0.246094	0.276722	0.348029	0.348029	0.492188	0.550282	0.696058	0.864376	1.10056	1.55643	2.49831	3.30199	5.99899
0.00266191	0.126058	0.175271	0.232658	0.246094	0.246094	0.276908	0.348029	0.348029	0.492188	0.550282	0.696058	0.865062	1.10056	1.55643	2.50034	3.30223	6.00796
0.00391629	0.126177	0.175306	0.232814	0.246094	0.246094	0.277525	0.348029	0.348029	0.492188	0.550282	0.696058	0.873513	1.10056	1.55643	2.50492	3.3061	6.03306
0.00572532	0.126345	0.175704	0.232827	0.246094	0.246094	0.278343	0.348029	0.348029	0.492188	0.550282	0.696058	0.874846	1.10056	1.55643	2.50533	3.31085	6.10905
0.00726081	0.126508	0.175783	0.233268	0.246094	0.246094	0.278814	0.348029	0.348029	0.492188	0.550282	0.696058	0.881381	1.10056	1.55643	2.50751	3.31085	6.15234
0.00737563	0.126542	0.175934	0.233371	0.246094	0.246094	0.279445	0.348029	0.348029	0.492188	0.550282	0.696058	0.885243	1.10056	1.56162	2.50967	3.31085	6.28321
0.00876747	0.126616	0.176144	0.233769	0.246094	0.246094	0.28029	0.348029	0.348029	0.492188	0.550282	0.69626	0.88567	1.10056	1.5634	2.50967	3.31085	6.29119
0.0106846	0.126925	0.176381	0.234506	0.246094	0.246094	0.280399	0.348029	0.348029	0.492188	0.550282	0.696894	0.887304	1.10056	1.57577	2.50967	3.31091	6.35094
0.0108874	0.126978	0.176798	0.234727	0.246094	0.246094	0.282666	0.348029	0.348037	0.492188	0.550282	0.697424	0.887304	1.10056	1.57577	2.50967	3.31198	6.35094
0.010985	0.127039	0.177324	0.234931	0.246094	0.246094	0.283703	0.348029	0.348052	0.492188	0.550282	0.700046	0.887304	1.10056	1.57577	2.51147	3.3134	6.35094
0.0118131	0.127753	0.177338	0.234941	0.246094	0.246094	0.284087	0.348029	0.349456	0.492188	0.550282	0.70028	0.887304	1.10056	1.57577	2.51232	3.31503	6.418
0.012477	0.12776	0.17747	0.23509	0.246094	0.246094	0.28413	0.348029	0.350927	0.492188	0.550282	0.701056	0.887304	1.10056	1.57577	2.51411	3.31991	6.47185
0.0130046	0.127905	0.178684	0.235887	0.246094	0.246094	0.284199	0.348029	0.351225	0.492188	0.550282	0.701255	0.887304	1.10602	1.57577	2.51584	3.32025	6.49706
0.0130435	0.128376	0.17906	0.23591	0.246094	0.246094	0.284503	0.348029	0.352036	0.492188	0.550282	0.70237	0.887304	1.11276	1.57577	2.52398	3.33564	6.67482
0.0138257	0.128385	0.179061	0.235918	0.246094	0.246094	0.286539	0.348029	0.352292	0.492188	0.550282	0.703004	0.887304	1.12069	1.57831	2.52984	3.34317	8.01601
0.0145383	0.12849	0.179198	0.235933	0.246094	0.246094	0.28678	0.348029	0.353401	0.492188	0.550282	0.706663	0.887304	1.12208	1.58197	2.53299	3.3456	8.04617
0.0153814	0.12873	0.179274	0.23662	0.246094	0.246094	0.288604	0.348029	0.35584	0.492188	0.550282	0.707703	0.887304	1.12266	1.59281	2.53369	3.34724	8.09495
0.0160556	0.128748	0.17943	0.236678	0.246094	0.246094	0.28864	0.348029	0.357322	0.492188	0.550282	0.713971	0.887304	1.13237	1.60737	2.53369	3.34724	8.09495
0.0162766	0.129401	0.181005	0.237005	0.246094	0.246094	0.288703	0.348029	0.357465	0.492188	0.550282	0.71699	0.887304	1.13411	1.6118	2.53369	3.34724	8.14715
0.0166314	0.129692	0.181716	0.237065	0.246094	0.246094	0.29064	0.348029	0.358445	0.492188	0.550282	0.719379	0.887304	1.14456	1.62151	2.53369	3.36081	8.14715
0.0168794	0.129901	0.182053	0.237677	0.246094	0.246094	0.29081	0.348029	0.362049	0.492188	0.550282	0.724933	0.887304	1.14513	1.63517	2.53369	3.36328	8.14715
0.0171283	0.129909	0.182244	0.238971	0.246094	0.246094	0.291357	0.348029	0.363354	0.492188	0.550282	0.731992	0.888113	1.14594	1.63572	2.53369	3.3678	11.3444
0.0173514	0.130116	0.182289	0.239738	0.246094	0.246094	0.291724	0.348029	0.36422	0.492188	0.550282	0.733583	0.889768	1.15359	1.65085	2.53369	3.36807	11.3444
0.0175457	0.130285	0.182401	0.239963	0.246094	0.246094	0.2931	0.348029	0.365014	0.492188	0.550282	0.738281	0.891026	1.15435	1.65085	2.53369	3.38873	11.8942
0.018334	0.130401	0.182416	0.240605	0.246094	0.246094	0.293325	0.348029	0.3657	0.492188	0.550282	0.738281	0.892213	1.16215	1.65085	2.54344	3.40082	11.9982
0.0184628	0.130448	0.18248	0.240691	0.246094	0.246094	0.293467	0.348029	0.365904	0.492188	0.550282	0.738281	0.898293	1.16266	1.65085	2.54462	3.40426	12.2183
0.0186545	0.130553	0.182558	0.241013	0.246094	0.246094	0.293571	0.348029	0.367687	0.492188	0.550282	0.738281	0.900457	1.16616	1.65085	2.5448	3.40925	12.3342
0.0194593	0.130565	0.182682	0.241607	0.246094	0.246094	0.293699	0.348029	0.368872	0.492188	0.550282	0.738281	0.901468	1.16902	1.67807	2.54757	3.41255	12.4539
0.0199055	0.130955	0.18274	0.242763	0.246094	0.246094	0.294519	0.348029	0.371118	0.492188	0.550282	0.738281	0.904302	1.17671	1.69227	2.56226	3.41708
0.0200117	0.131059	0.182852	0.243242	0.246094	0.246094	0.294973	0.348029	0.371998	0.492188	0.550282	0.738281	0.904761	1.18173	1.69602	2.56881	3.41836
0.0201564	0.131107	0.183068	0.243444	0.246094	0.246094	0.295721	0.348029	0.372307	0.492188	0.550282	0.738281	0.906521	1.18607	1.70415	2.56916	3.41865
0.0202374	0.131223	0.183207	0.243857	0.246094	0.246094	0.296225	0.348029	0.374866	0.492188	0.550282	0.738281	0.906757	1.19168	1.71528	2.56929	3.41884
0.0202833	0.131324	0.183639	0.244342	0.246094	0.246094	0.296747	0.348029	0.375219	0.492188	0.550282	0.738281	0.907166	1.19171	1.72244	2.57291	3.41884
0.0204558	0.131357	0.183677	0.244471	0.246094	0.246094	0.296815	0.348029	0.3753	0.492188	0.550282	0.738281	0.909138	1.19296	1.72266	2.57415	3.41884
0.0205204	0.131492	0.183838	0.244557	0.246094	0.246094	0.297936	0.348029	0.376161	0.492188	0.550282	0.738281	0.916748	1.19354	1.72266	2.58621	3.42521
0.0209953	0.13155	0.183849	0.245043	0.246094	0.246094	0.298824	0.348029	0.377106	0.492188	0.550282	0.738281	0.919704	1.19796	1.72266	2.58695	3.42769
0.0214349	0.131598	0.184027	0.24519	0.246094	0.246094	0.299469	0.348029	0.377569	0.492188	0.550282	0.738281	0.921964	1.21763	1.72266	2.58739	3.42769
0.0223126	0.131683	0.18409	0.246037	0.246094	0.246094	0.299666	0.348029	0.378528	0.492188	0.550282	0.738281	0.9239	1.22208	1.72266	2.59637	3.42769
0.0225673	0.131696	0.184467	0.246094	0.246094	0.246094	0.300015	0.348029	0.38124	0.492188	0.550282	0.738281	0.926846	1.2231	1.72266	2.59773	3.44531
0.0225834	0.132032	0.184574	0.246094	0.246094	0.246094	0.300127	0.348029	0.382051	0.492188	0.550282	0.738281	0.938944	1.22924	1.72266	2.6018	3.44531
0.0226169	0.132523	0.184769	0.246094	0.246094	0.246094	0.300338	0.348029	0.382066	0.492188	0.550282	0.738281	0.93986	1.23047	1.73362	2.60402	3.44531
0.02274	0.132544	0.184821	0.246094	0.246094	0.246094	0.300598	0.348029	0.383357	0.492188	0.550282	0.738281	0.964137	1.23047	1.73973	2.60752	3.4507
0.0229237	0.132991	0.185038	0.246094	0.246094	0.246094	0.301757	0.348029	0.383607	0.492188	0.550282	0.738281	0.968695	1.23047	1.74015	2.61501	3.45409
0.0230571	0.132996	0.185542	0.246094	0.246094	0.246094	0.302589	0.348029	0.383747	0.492188	0.552184	0.738281	0.969925	1.23047	1.74015	2.61722	3.45409
0.024214	0.133047	0.185778	0.246094	0.246094	0.246094	0.302841	0.348029	0.384018	0.492188	0.553278	0.738281	0.970665	1.23047	1.74015	2.61844	3.45936
0.0242265	0.13308	0.185859	0.246094	0.246094	0.246094	0.303224	0.348029	0.385314	0.492188	0.554945	0.738281	0.972711	1.23047	1.74015	2.62508	3.46999
0.0242786	0.133691	0.18604	0.246094	0.246094	0.246094	0.303527	0.348029	0.387556	0.492188	0.555556	0.738281	0.974601	1.23047	1.74015	2.62915	3.48029
0.0245015	0.133738	0.186089	0.246094	0.246094	0.246094	0.303623	0.348029	0.390342	0.493657	0.556018	0.738281	0.976733	1.23047	1.74015	2.63021	3.48029
0.0246223	0.133763	0.186867	0.246094	0.246094	0.246094	0.304131	0.348029	0.391848	0.494352	0.557314	0.738281	0.979603	1.23047	1.74015	2.63212	3.48029
0.0248445	0.133843	0.186977	0.246094	0.246094	0.246094	0.304728	0.348029	0.395739	0.494579	0.557725	0.738281	0.98197	1.23047	1.74576	2.63318	3.48029
0.024875	0.134242	0.187327	0.246094	0.246094	0.246094	0.305522	0.348029	0.396915	0.495397	0.557971	0.738281	0.984375	1.23047	1.75492	2.63815	3.48029
0.02516	0.134309	0.187479	0.246094	0.246094	0.246094	0.305726	0.348029	0.398528	0.497951	0.558656	0.738281	0.984375	1.23047	1.75986	2.63879	3.48029
0.0252609	0.134501	0.187749	0.246094	0.246094	0.246094	0.306188	0.348029	0.399165	0.498117	0.561187	0.741471	0.984375	1.23047	1.76115	2.63898	3.48029
0.0254148	0.13456	0.188139	0.246094	0.246094	0.246094	0.306189	0.348029	0.399523	0.499457	0.564242	0.747113	0.984375	1.23047	1.7649	2.64249	3.48029
0.0254802	0.134972	0.18833	0.246094	0.246094	0.246094	0.306729	0.348029	0.399781	0.500147	0.56714	0.750908	0.984375	1.23047	1.77338	2.64394	3.48029
0.0255274	0.13503	0.188478	0.246094	0.246094	0.246094	0.307197	0.348029	0.399874	0.500392	0.567609	0.753961	0.984375	1.23047	1.77627	2.65051	3.48029
0.0260432	0.135072	0.18854	0.246094	0.246094	0.246094	0.307369	0.348029	0.400281	0.502635	0.578667	0.755957	0.984375	1.23047	1.77907	2.65271	3.48253
0.0261856	0.135158	0.18856	0.246094	0.246094	0.246094	0.308309	0.348029	0.400288	0.503432	0.580443	0.759758	0.984375	1.23047	1.78613	2.65576	3.48369
0.0271064	0.135776	0.188826	0.246094	0.246094	0.246094	0.308375	0.348029	0.40195	0.503675	0.581303	0.77033	0.984375	1.23047	1.79159	2.66191	3.48739
0.0272737	0.135986	0.188856	0.246094	0.246094	0.246094	0.308818	0.348029	0.405698	0.504824	0.584502	0.771558	0.984375	1.23047	1.79159	2.66191	3.52203
0.0274505	0.136113	0.189067	0.246094	0.246094	0.246094	0.309686	0.348029	0.407681	0.507279	0.584959	0.774631	0.984375	1.23047	1.79159	2.66191	3.52353
0.0277489	0.136127	0.189096	0.246094	0.246094	0.246094	0.312293	0.348029	0.408038	0.508141	0.585157	0.778217	0.984375	1.23047	1.79159	2.66494	3.52813
0.0278619	0.136135	0.189398	0.246094	0.246094	0.246094	0.312865	0.348029	0.412617	0.508551	0.59682	0.778217	0.984375	1.23047	1.79159	2.67158	3.54121
0.0288342	0.13614	0.189533	0.246094	0.246094	0.246094	0.312908	0.348029	0.413733	0.508736	0.597328	0.778217	0.984375	1.23358	1.79377	2.67862	3.54362
0.0289053	0.136488	0.189656	0.246094	0.246094	0.246094	0.313162	0.348029	0.413746	0.508934	0.603743	0.778217	0.984375	1.23618	1.80736	2.69082	3.5495
0.0292106	0.136571	0.189676	0.246094	0.246094	0.246094	0.313638	0.348029	0.41913	0.509391	0.604733	0.778217	0.984375	1.23803	1.8082	2.69118	3.56251
0.0298203	0.136639	0.189678	0.246094	0.246094	0.246094	0.314616	0.348029	0.420799	0.509742	0.605576	0.778217	0.984375	1.23958	1.8419	2.69507	3.5715
0.0299692	0.136754	0.190006	0.246094	0.246094	0.246094	0.315392	0.348029	0.423184	0.51051	0.609691	0.778217	0.984375	1.24234	1.84285	2.69519	3.58929
0.0300358	0.137106	0.190226	0.246094	0.246094	0.246094	0.316657	0.348029	0.423646	0.511669	0.61358	0.778217	0.984375	1.24427	1.8596	2.70856	3.5936
0.0301452	0.137112	0.190246	0.246094	0.246094	0.246094	0.318103	0.348029	0.424383	0.512305	0.617716	0.778217	0.984375	1.24651	1.86113	2.7107	3.60122
0.0302137	0.137408	0.190345	0.246094	0.246094	0.246094	0.318215	0.348029	0.426027	0.512346	0.617891	0.778217	0.984375	1.25095	1.86519	2.71176	3.60443
0.0302277	0.137951	0.190448	0.246094	0.246094	0.246094	0.318248	0.348029	0.426203	0.514638	0.619231	0.778217	0.984375	1.25372	1.87419	2.7118	3.62387
0.0304401	0.138224	0.190729	0.246094	0.246094	0.246094	0.31842	0.348029	0.42633	0.518687	0.619483	0.778217	0.984375	1.25484	1.87419	2.71819	3.6319
0.0305077	0.138341	0.190914	0.246094	0.246094	0.246094	0.31863	0.348029	0.426346	0.519898	0.619809	0.778217	0.984375	1.25484	1.87419	2.7367	3.63353
0.0306582	0.138652	0.191474	0.246094	0.246094	0.246094	0.321654	0.348029	0.427413	0.521109	0.620595	0.778217	0.984375	1.25484	1.87419	2.73893	3.65845
0.0307058	0.138769	0.191702	0.246094	0.246094	0.246094	0.321817	0.348029	0.428992	0.522002	0.621596	0.778217	0.984375	1.25484	1.87679	2.74185	3.65845
0.0308806	0.138868	0.191863	0.246094	0.246094	0.246094	0.324753	0.348029	0.429355	0.524098	0.62308	0.778217	0.984375	1.25484	1.87729	2.74798	3.65845
0.0309934	0.13887	0.192073	0.246094	0.246094	0.246094	0.324827	0.348029	0.429857	0.525229	0.62503	0.778217	0.984375	1.25484	1.87796	2.75141	3.65845
0.0317571	0.139149	0.19244	0.246094	0.246094	0.246094	0.325217	0.348029	0.431137	0.52569	0.628024	0.778217	0.984375	1.25484	1.91792	2.75141	3.65845
0.0318523	0.139174	0.192555	0.246094	0.246094	0.246094	0.327006	0.348029	0.432847	0.527219	0.62852	0.778217	0.985267	1.25484	1.92205	2.75141	3.65845
0.0322611	0.139322	0.192593	0.246094	0.246094	0.246094	0.329743	0.348029	0.432936	0.533075	0.634026	0.778217	0.985459	1.25484	1.92205	2.75141	3.66178
0.0324352	0.139333	0.192622	0.246094	0.246094	0.246094	0.330046	0.348029	0.434567	0.534382	0.634307	0.778217	0.988288	1.25484	1.92205	2.75141	3.66744
0.0325775	0.13939	0.192967	0.246094	0.246094	0.246094	0.330316	0.348029	0.434585	0.535688	0.635795	0.778217	0.991428	1.25484	1.92205	2.75141	3.67196
0.0328892	0.139816	0.193267	0.246094	0.246094	0.246094	0.332427	0.348396	0.435187	0.537635	0.636069	0.778217	0.992173	1.25484	1.92205	2.75141	3.68321
0.033431	0.139871	0.193479	0.246094	0.246094	0.246094	0.333259	0.349584	0.439469	0.538416	0.639008	0.778217	0.996374	1.25484	1.92205	2.75141	3.68658
0.0336717	0.140154	0.193918	0.246094	0.246094	0.246094	0.334297	0.350096	0.439629	0.539678	0.639132	0.778217	0.997497	1.25484	1.92205	2.75141	3.68804
0.0338227	0.140245	0.193953	0.246094	0.246094	0.246094	0.33439	0.350817	0.440144	0.540094	0.639209	0.778217	0.999383	1.25484	1.92205	2.75141	3.69141
0.0338663	0.14026	0.194165	0.246094	0.246094	0.246094	0.336266	0.351414	0.4406	0.540686	0.640472	0.778217	1.01467	1.25484	1.92205	2.75141	3.69141
0.0341275	0.140373	0.194305	0.246094	0.246094	0.246094	0.336939	0.351876	0.44102	0.542117	0.642911	0.778217	1.01467	1.25484	1.92205	2.75141	3.69141
0.0345359	0.140459	0.194335	0.246094	0.246094	0.246094	0.337374	0.352455	0.441632	0.54252	0.645833	0.778217	1.01467	1.25484	1.924	2.75141	3.69141
0.0347422	0.140525	0.194629	0.246094	0.246094	0.246094	0.337708	0.354002	0.443889	0.542719	0.646758	0.778217	1.01467	1.25484	1.92733	2.75141	3.69141
0.0348386	0.140546	0.194764	0.246094	0.246094	0.246094	0.338205	0.354014	0.444382	0.543478	0.649514	0.778217	1.01467	1.25484	1.92767	2.75846	3.6996
0.0348492	0.140805	0.195142	0.246094	0.246094	0.246094	0.339268	0.354246	0.445445	0.543901	0.649957	0.778217	1.01467	1.25484	1.93401	2.76174	3.6996
0.0350837	0.140958	0.19567	0.246094	0.246094	0.246094	0.339414	0.355195	0.446242	0.546158	0.652144	0.778217	1.01467	1.25484	1.93675	2.7635	3.6996
0.0351029	0.141597	0.195713	0.246094	0.246094	0.246094	0.340832	0.355782	0.446296	0.547008	0.65223	0.778217	1.01467	1.25484	1.93897	2.77856	3.71581
0.0354623	0.141612	0.196303	0.246094	0.246094	0.246094	0.340834	0.356292	0.451166	0.548347	0.655683	0.778217	1.01467	1.25484	1.94064	2.77984	3.72407
0.0356269	0.141674	0.196679	0.246094	0.246094	0.246094	0.341737	0.356601	0.452272	0.548426	0.659597	0.778217	1.01467	1.25484	1.94065	2.78423	3.72407
0.0359486	0.141959	0.196854	0.246094	0.246094	0.246094	0.341985	0.357551	0.452459	0.548728	0.659851	0.778217	1.01467	1.2722	1.94319	2.79215	3.72407
0.0360603	0.141977	0.197359	0.246094	0.246094	0.246094	0.345653	0.357842	0.453033	0.549309	0.664233	0.778217	1.01467	1.2784	1.94546	2.79971	3.72407
0.0366378	0.14207	0.197405	0.246094	0.246094	0.246094	0.345961	0.35788	0.453299	0.549583	0.667548	0.778217	1.01467	1.28719	1.95356	2.80156	3.72476
0.0369299	0.142083	0.19745	0.246094	0.246094	0.246094	0.346444	0.358286	0.454054	0.550282	0.669245	0.778217	1.01467	1.29794	1.96546	2.80244	3.74839
0.0370684	0.142857	0.197617	0.246094	0.246094	0.246094	0.347366	0.35855	0.456611	0.550282	0.672036	0.780422	1.01467	1.30292	1.96715	2.80398	3.74839
0.0371367	0.14297	0.197646	0.246094	0.246094	0.246094	0.348029	0.358674	0.458858	0.550282	0.672554	0.782417	1.01467	1.3036	1.96875	2.8059	3.75646
0.03734	0.14313	0.197721	0.246094	0.246094	0.246094	0.348029	0.358899	0.462339	0.550282	0.67406	0.785283	1.01467	1.30725	1.96875	2.8059	3.75646
0.0373433	0.143135	0.198036	0.246094	0.246094	0.246094	0.348029	0.359673	0.462654	0.550282	0.674839	0.78537	1.01467	1.3079	1.96875	2.8059	3.75968
0.0374071	0.143248	0.198152	0.246094	0.246094	0.246094	0.348029	0.36022	0.462659	0.550282	0.680569	0.789655	1.01467	1.30987	1.96875	2.8059	3.75989
0.0374404	0.143359	0.198415	0.246094	0.246094	0.246094	0.348029	0.361228	0.46687	0.550282	0.683323	0.791299	1.01467	1.31581	1.96875	2.8059	3.77128
0.0374954	0.143621	0.198542	0.246094	0.246094	0.246094	0.348029	0.361395	0.467373	0.550282	0.686709	0.793512	1.01467	1.32526	1.96875	2.8059	3.77331
0.0377473	0.144029	0.198616	0.246094	0.246094	0.246094	0.348029	0.362141	0.467494	0.550282	0.686829	0.796486	1.01467	1.32526	1.97354	2.8059	3.77445
0.0381096	0.144042	0.198652	0.246094	0.246094	0.246094	0.348029	0.362938	0.46828	0.550282	0.688208	0.797988	1.01467	1.32526	1.97474	2.80674	3.78307
0.03852	0.144097	0.19897	0.246094	0.246094	0.246094	0.348029	0.363443	0.469384	0.550282	0.689743	0.798871	1.01467	1.32526	1.98036	2.80865	3.79143
0.0385457	0.144687	0.199166	0.246094	0.246094	0.246094	0.348029	0.363977	0.470128	0.550282	0.692286	0.801452	1.01467	1.32526	1.98407	2.8129	3.80273
0.0386894	0.144745	0.199182	0.246094	0.246094	0.246094	0.348029	0.364298	0.471211	0.550282	0.696058	0.802568	1.01467	1.32526	1.98407	2.81304	3.8204
0.0388074	0.144823	0.199427	0.246094	0.246094	0.246094	0.348029	0.36445	0.471988	0.550282	0.696058	0.802887	1.01467	1.32526	1.98407	2.81393	3.84411
0.038883	0.14511	0.199715	0.246094	0.246094	0.246094	0.348029	0.364642	0.4721	0.550282	0.696058	0.8051	1.02099	1.32526	1.98407	2.82609	3.84411
0.0390181	0.145279	0.200012	0.246094	0.246094	0.246094	0.348029	0.366221	0.472752	0.550282	0.696058	0.809373	1.02743	1.32526	1.98407	2.82683	3.84411
0.0390863	0.145477	0.200476	0.246094	0.246094	0.246164	0.348029	0.367148	0.47359	0.550282	0.696058	0.811863	1.03066	1.32526	1.98407	2.82957	3.84788
0.0398142	0.145616	0.200523	0.246094	0.246094	0.247247	0.348029	0.369024	0.47636	0.550282	0.696058	0.814786	1.03239	1.32526	1.98407	2.83052	3.85198
0.0400612	0.145769	0.201006	0.246094	0.246094	0.248071	0.348029	0.369865	0.476438	0.550282	0.696058	0.819899	1.03937	1.32526	1.98952	2.83173	3.85198
0.0401193	0.146057	0.201655	0.246094	0.246094	0.248568	0.348029	0.370035	0.481498	0.550282	0.696058	0.821469	1.041	1.32526	1.99003	2.83391	3.85897
0.0404203	0.146074	0.201679	0.246094	0.246094	0.249561	0.348029	0.370297	0.482367	0.550282	0.696058	0.823129	1.04409	1.32526	1.99776	2.83632	3.86518
0.0404809	0.146412	0.201865	0.246094	0.246094	0.249732	0.348029	0.370324	0.48283	0.550282	0.696058	0.830809	1.04409	1.32526	2.00525	2.84143	3.8737
0.0407493	0.146432	0.202182	0.246094	0.246094	0.250081	0.348029	0.373152	0.483911	0.550282	0.696058	0.83567	1.04409	1.32526	2.00802	2.84774	3.88503
0.0408638	0.146733	0.202876	0.246094	0.246094	0.25027	0.348029	0.37372	0.484977	0.550282	0.696058	0.851891	1.04409	1.32526	2.01961	2.84937	3.89108
0.0418166	0.146825	0.203229	0.246094	0.246094	0.252045	0.348029	0.374231	0.485879	0.550282	0.696058	0.858548	1.04409	1.32526	2.02759	2.84962	3.89108
0.042317	0.146924	0.203459	0.246094	0.246094	0.253103	0.348029	0.374236	0.486915	0.550282	0.696058	0.863538	1.04926	1.32526	2.02934	2.85125	3.89108
0.0423326	0.146976	0.203504	0.246094	0.246094	0.253293	0.348029	0.376952	0.48839	0.550282	0.696058	0.867131	1.05138	1.32526	2.02934	2.85308	3.89108
0.0430912	0.147098	0.20351	0.246094	0.246094	0.253806	0.348029	0.377253	0.488567	0.550282	0.696058	0.8679	1.05321	1.32526	2.03054	2.85332	3.89108
0.043153	0.147107	0.203946	0.246094	0.246094	0.254265	0.348029	0.377271	0.488719	0.550282	0.700565	0.872087	1.06491	1.33246	2.03172	2.85458	3.89108
0.0431644	0.147494	0.203947	0.246094	0.246094	0.254946	0.348029	0.37774	0.489481	0.550282	0.702532	0.87216	1.06708	1.33392	2.0318	2.85551	3.92427
0.0433155	0.147634	0.20403	0.246094	0.246094	0.255036	0.348029	0.379164	0.492188	0.550282	0.704426	0.873186	1.0733	1.33748	2.03807	2.85682	3.93526
0.0438339	0.147641	0.204208	0.246094	0.246094	0.255081	0.348029	0.379653	0.492188	0.550282	0.707071	0.875025	1.07561	1.3415	2.0383	2.86053	3.93717
0.0439665	0.148095	0.204549	0.246094	0.246094	0.256059	0.348029	0.379761	0.492188	0.550282	0.708023	0.877493	1.08433	1.34881	2.0448	2.86563	3.9375
0.0440028	0.148138	0.205544	0.246094	0.246094	0.256208	0.348029	0.380451	0.492188	0.550282	0.712447	0.877967	1.08583	1.35073	2.04678	2.86573	3.9375
0.0440779	0.148275	0.20642	0.246094	0.246094	0.256306	0.348029	0.381248	0.492188	0.550282	0.714415	0.8849	1.08631	1.3629	2.05435	2.86583	3.9375
0.044445	0.148398	0.207187	0.246094	0.246094	0.25645	0.348029	0.382112	0.492188	0.550282	0.715987	0.886727	1.09397	1.36693	2.05596	2.86926	3.9375
0.0446748	0.148899	0.207299	0.246094	0.246094	0.25694	0.348029	0.382561	0.492188	0.550282	0.718701	0.887304	1.09537	1.36732	2.06028	2.86992	3.9375
0.0446748	0.149262	0.207408	0.246094	0.246094	0.257165	0.348029	0.382572	0.492188	0.550282	0.725685	0.887304	1.09562	1.36913	2.07356	2.86992	3.93758
0.0448556	0.149306	0.207464	0.246094	0.246094	0.259103	0.348029	0.383693	0.492188	0.550282	0.728676	0.887304	1.09812	1.38469	2.07885	2.87319	3.9398
0.0448642	0.149363	0.207647	0.246094	0.246094	0.259251	0.348029	0.383947	0.492188	0.550282	0.731028	0.887304	1.09894	1.39115	2.07956	2.87373	3.94144
0.045079	0.149579	0.207831	0.246094	0.246094	0.259937	0.348029	0.384032	0.492188	0.550282	0.732064	0.887304	1.10056	1.39212	2.08817	2.87612	3.94183
0.0451916	0.149595	0.208276	0.246094	0.246094	0.260121	0.348029	0.384865	0.492188	0.550282	0.732561	0.887304	1.10056	1.39212	2.08817	2.8839	3.94257
0.0452187	0.149599	0.208356	0.246094	0.246094	0.261197	0.348029	0.385184	0.492188	0.550282	0.737324	0.887304	1.10056	1.39212	2.08817	2.88435	3.94518
0.0452674	0.149649	0.20845	0.246094	0.246094	0.261577	0.348029	0.385431	0.492188	0.550282	0.738281	0.887304	1.10056	1.39212	2.10263	2.88478	3.94518
0.0452802	0.149822	0.208642	0.246094	0.246094	0.262342	0.348029	0.385928	0.492188	0.550282	0.738281	0.887304	1.10056	1.39212	2.10878	2.88736	3.94518
0.0455084	0.149883	0.208754	0.246094	0.246094	0.262705	0.348029	0.386304	0.492188	0.550282	0.738281	0.887304	1.10056	1.39212	2.11698	2.89285	3.94518
0.0457624	0.150147	0.209407	0.246094	0.246094	0.263723	0.348029	0.389649	0.492188	0.550282	0.738281	0.887304	1.10056	1.39212	2.11698	2.89764	3.95635
0.045792	0.150273	0.209448	0.246094	0.246094	0.263921	0.348029	0.392717	0.492188	0.550282	0.738281	0.887304	1.10056	1.39212	2.11698	2.89943	3.95918
0.0458333	0.150288	0.209511	0.246094	0.246094	0.264672	0.348029	0.393372	0.492188	0.550282	0.738281	0.887304	1.10056	1.39212	2.11698	2.90634	3.96676
0.0458556	0.150634	0.209804	0.246094	0.246094	0.265456	0.348029	0.393797	0.492188	0.550282	0.738281	0.887304	1.10056	1.39693	2.11698	2.9074	3.96814
0.0459481	0.151002	0.209896	0.246094	0.246094	0.265673	0.348029	0.394995	0.492188	0.550282	0.738281	0.887304	1.10056	1.39753	2.11698	2.91104	3.96814
0.0460938	0.151162	0.210871	0.246094	0.246094	0.265834	0.348029	0.395538	0.492188	0.550282	0.738281	0.887304	1.10056	1.40342	2.11698	2.91529	3.96814
0.0464485	0.151437	0.21118	0.246094	0.246094	0.266477	0.348029	0.396116	0.492188	0.550282	0.738281	0.887304	1.10056	1.42276	2.12284	2.9153	3.96814
0.0464671	0.151681	0.211315	0.246094	0.246094	0.268907	0.348029	0.396228	0.492188	0.550282	0.738281	0.887304	1.10056	1.42696	2.12495	2.91621	3.97198
0.0468718	0.151768	0.211343	0.246094	0.246094	0.268931	0.348029	0.397244	0.492188	0.550282	0.738281	0.888346	1.10056	1.42697	2.13962	2.91759	3.97321
0.0469557	0.151882	0.21141	0.246094	0.246094	0.269132	0.348029	0.398006	0.492188	0.550282	0.738281	0.890733	1.10056	1.43496	2.16316	2.9232	3.97577
0.0471284	0.152055	0.211837	0.246094	0.246094	0.270601	0.348029	0.398377	0.492188	0.550282	0.738281	0.89218	1.10056	1.43496	2.16423	2.92725	3.97577
0.0475684	0.152098	0.211963	0.246094	0.246094	0.271194	0.348029	0.398579	0.492188	0.550282	0.738281	0.896241	1.10349	1.43496	2.17367	2.92814	3.97577
0.0476776	0.152111	0.212484	0.246094	0.246094	0.271321	0.348029	0.399703	0.492188	0.550282	0.738281	0.899654	1.10418	1.43496	2.17603	2.93187	3.97577
0.047778	0.152377	0.212509	0.246094	0.246094	0.272192	0.348029	0.399834	0.492188	0.550282	0.738281	0.905098	1.10937	1.43496	2.17772	2.93335	3.97577
0.0479569	0.152416	0.212624	0.246094	0.246094	0.272231	0.348029	0.401975	0.492188	0.550282	0.738281	0.906668	1.11167	1.43801	2.17896	2.93341	3.97577
0.0480761	0.152585	0.212802	0.246094	0.246094	0.272778	0.348029	0.403376	0.492188	0.550282	0.738281	0.915973	1.11664	1.43868	2.18378	2.93517	3.99186
0.0481157	0.152719	0.212864	0.246094	0.246094	0.273478	0.348029	0.40437	0.492188	0.550282	0.738281	0.916576	1.12767	1.44535	2.18552	2.9423	4.00064
0.0483209	0.152762	0.212949	0.246094	0.246094	0.273514	0.348029	0.404384	0.492188	0.550282	0.738281	0.92153	1.13051	1.44605	2.19282	2.95127	4.01087
0.048425	0.152794	0.21313	0.246094	0.246094	0.274986	0.348029	0.404941	0.492188	0.550282	0.738281	0.92502	1.13492	1.45379	2.19289	2.95312	4.01878
0.0484931	0.15295	0.213448	0.246094	0.246094	0.275602	0.348029	0.406664	0.492188	0.550282	0.738281	0.929037	1.13707	1.46089	2.19295	2.95312	4.02227
0.0486079	0.153082	0.213507	0.246094	0.246094	0.277061	0.348029	0.407401	0.492188	0.550282	0.738281	0.931299	1.1492	1.46176	2.20068	2.95312	4.03624
0.0487157	0.153167	0.213678	0.246094	0.246094	0.277114	0.348029	0.408724	0.492188	0.550282	0.738281	0.936612	1.15016	1.47461	2.21274	2.95312	4.03624
0.0489773	0.15319	0.213909	0.246094	0.246094	0.277344	0.348029	0.409677	0.492188	0.550282	0.738281	0.939725	1.15189	1.47656	2.21351	2.9563	4.03624
0.0493432	0.153212	0.214359	0.246094	0.246094	0.278581	0.348029	0.409868	0.492188	0.550282	0.738281	0.94574	1.16679	1.47656	2.21484	2.95942	4.03624
0.0495113	0.153257	0.214773	0.246094	0.246094	0.280856	0.348029	0.410761	0.492188	0.550282	0.738281	0.946435	1.16685	1.47656	2.21484	2.96079	4.04108
0.049526	0.153282	0.21483	0.246094	0.246094	0.281236	0.348029	0.410843	0.492188	0.550282	0.738281	0.953826	1.16719	1.47656	2.21484	2.96306	4.05144
0.0498244	0.153403	0.214989	0.246094	0.246094	0.282029	0.348029	0.412059	0.492188	0.550282	0.738281	0.958897	1.1686	1.47656	2.2262	2.96336	4.06285
0.0498924	0.15344	0.215251	0.246094	0.246094	0.282442	0.348029	0.413306	0.492188	0.550282	0.738281	0.959342	1.17449	1.47656	2.22847	2.96336	4.07358
0.0498971	0.153461	0.215706	0.246094	0.246094	0.283717	0.348029	0.413828	0.492188	0.550282	0.738281	0.96077	1.18816	1.47656	2.24144	2.96336	4.07358
0.050066	0.15358	0.216611	0.246094	0.246094	0.284038	0.348029	0.415381	0.492188	0.550282	0.738281	0.961765	1.18911	1.47656	2.24207	2.96336	4.07358
0.0502123	0.153615	0.216691	0.246094	0.246094	0.284901	0.348029	0.415479	0.492188	0.550282	0.738281	0.963147	1.19063	1.47656	2.25694	2.96336	4.08106
0.0503117	0.153745	0.217146	0.246094	0.246094	0.285587	0.348029	0.416081	0.492188	0.550282	0.738281	0.963335	1.19276	1.47656	2.26341	2.96336	4.09337
0.0503444	0.154119	0.217186	0.246094	0.246094	0.285758	0.348029	0.418874	0.492188	0.550282	0.738281	0.963505	1.19351	1.47656	2.26845	2.96336	4.09582
0.0508075	0.154492	0.217796	0.246094	0.246094	0.286109	0.348029	0.419007	0.492188	0.550282	0.738281	0.964234	1.1999	1.47656	2.26887	2.96336	4.10659
0.0508922	0.155181	0.218138	0.246094	0.246094	0.286161	0.348029	0.420869	0.492188	0.550282	0.738281	0.964371	1.20136	1.47823	2.26887	2.96986	4.108
0.0509802	0.1552	0.218576	0.246094	0.246094	0.286266	0.348029	0.421128	0.492188	0.550282	0.738281	0.967198	1.20232	1.48118	2.26887	2.97297	4.11302
0.0511049	0.155278	0.218787	0.246094	0.246094	0.286603	0.348029	0.422118	0.492188	0.550282	0.738281	0.967445	1.20344	1.48447	2.26887	2.97356	4.11945
0.0511675	0.155315	0.218817	0.246094	0.246094	0.286794	0.348029	0.422167	0.492188	0.550282	0.738281	0.969553	1.20532	1.4908	2.26887	2.97356	4.12498
0.0513377	0.15677	0.219066	0.246094	0.246094	0.288401	0.348029	0.422225	0.492188	0.550282	0.738281	0.974938	1.2144	1.49693	2.26887	2.97356	4.12528
0.0513885	0.156826	0.219819	0.246094	0.246094	0.290768	0.348029	0.423328	0.492188	0.552949	0.740977	0.975584	1.21512	1.49693	2.26887	2.97356	4.12528
0.0514062	0.156885	0.219927	0.246094	0.246094	0.290809	0.348029	0.423493	0.492188	0.553255	0.74452	0.978503	1.21925	1.49693	2.26887	2.97356	4.12528
0.0519616	0.157327	0.220597	0.246094	0.246094	0.29111	0.348029	0.427451	0.492188	0.554724	0.745906	0.981956	1.2234	1.49693	2.26887	2.97356	4.12528
0.0521606	0.157372	0.220598	0.246094	0.246094	0.292031	0.348029	0.427803	0.492188	0.557747	0.747799	0.984375	1.22487	1.49693	2.27291	2.97472	4.12528
0.0522202	0.157483	0.22065	0.246094	0.246094	0.29274	0.348029	0.428075	0.492188	0.557805	0.749869	0.984375	1.22499	1.49693	2.27511	2.97895	4.13854
0.0523888	0.157512	0.221278	0.246094	0.246094	0.293464	0.348029	0.430788	0.492188	0.559322	0.751166	0.984375	1.22513	1.51323	2.28715	2.9807	4.13986
0.0525762	0.157768	0.221322	0.246094	0.246094	0.293548	0.348029	0.432444	0.492188	0.55939	0.759955	0.984375	1.22981	1.51591	2.28847	2.98169	4.14141
0.0528346	0.157984	0.221365	0.246094	0.246094	0.294203	0.348029	0.433812	0.492188	0.561544	0.766575	0.984375	1.23047	1.51598	2.28985	2.98273	4.14537
0.0528605	0.158287	0.221901	0.246094	0.246094	0.2943	0.348029	0.434739	0.492188	0.562795	0.767325	0.984375	1.23047	1.52361	2.29117	2.98811	4.15222
0.0530413	0.158343	0.222397	0.246094	0.246094	0.294527	0.348029	0.435058	0.492188	0.575215	0.767821	0.984375	1.23047	1.52384	2.29757	2.99094	4.15489
0.0530616	0.158651	0.222767	0.246094	0.246094	0.295788	0.348029	0.43532	0.492188	0.581327	0.768424	0.984375	1.23047	1.52441	2.3028	2.99386	4.17929
0.0531201	0.158882	0.222769	0.246094	0.246094	0.296756	0.348029	0.435427	0.492188	0.58424	0.776157	0.984375	1.23047	1.53578	2.30704	2.99386	4.18224
0.0531243	0.159209	0.223455	0.246094	0.246094	0.29687	0.348029	0.435525	0.492188	0.587535	0.776839	0.984375	1.23047	1.53583	2.31173	2.99432	4.18359
0.0531483	0.159479	0.223783	0.246094	0.246094	0.296927	0.348029	0.436002	0.492188	0.588466	0.777749	0.984375	1.23047	1.54056	2.31359	2.99599	4.18359
0.0531649	0.159948	0.224234	0.246094	0.246094	0.296939	0.348029	0.436574	0.492188	0.590995	0.778217	0.984375	1.23047	1.55643	2.31817	3.0033	4.18359
0.0532793	0.160425	0.224238	0.246094	0.246094	0.297102	0.348029	0.436873	0.492188	0.592341	0.778217	0.984375	1.23047	1.55643	2.32164	3.00396	4.18359
0.053373	0.160494	0.224688	0.246094	0.246094	0.29778	0.348029	0.438201	0.492188	0.593522	0.778217	0.984375	1.23047	1.55643	2.32164	3.00396	4.18359
0.0534483	0.160502	0.22551	0.246094	0.246094	0.297869	0.348029	0.442494	0.492188	0.594702	0.778217	0.984375	1.23047	1.55643	2.32164	3.00396	4.19083
0.0535062	0.16055	0.225644	0.246094	0.246094	0.297985	0.348029	0.44441	0.492188	0.599161	0.778217	0.984375	1.23047	1.55643	2.32164	3.00819	4.21104
0.0535819	0.161185	0.226398	0.246094	0.246094	0.300462	0.348029	0.445182	0.492188	0.603096	0.778217	0.984375	1.23047	1.55643	2.32164	3.01272	4.23396
0.0543553	0.161369	0.226445	0.246094	0.246094	0.300881	0.348029	0.44577	0.492188	0.604283	0.778217	0.984375	1.23047	1.55643	2.32535	3.02298	4.23396
0.0544843	0.161436	0.226874	0.246094	0.246094	0.301155	0.348029	0.44751	0.492188	0.605588	0.778217	0.984375	1.23047	1.55643	2.32995	3.02464	4.23396
0.0545474	0.161677	0.227531	0.246094	0.246094	0.301686	0.348029	0.447709	0.492188	0.606249	0.778217	0.984375	1.23047	1.56032	2.33012	3.02823	4.23396
0.0546701	0.16173	0.227565	0.246094	0.246094	0.302408	0.348029	0.448315	0.492188	0.606792	0.778217	0.984375	1.23047	1.56301	2.33103	3.03027	4.23396
0.0547066	0.161871	0.227768	0.246094	0.246094	0.304108	0.348029	0.448374	0.492188	0.610781	0.778217	0.984375	1.23047	1.56618	2.33465	3.03698	4.23396
0.054853	0.162	0.228046	0.246094	0.246094	0.304571	0.348029	0.449543	0.492188	0.614607	0.778217	0.984375	1.23047	1.57068	2.33465	3.04292	4.23396
0.0548879	0.162164	0.228484	0.246094	0.246094	0.305737	0.348029	0.450299	0.492188	0.61897	0.778217	0.984375	1.23047	1.57307	2.33926	3.04401	4.23396
0.0553515	0.162466	0.228868	0.246094	0.246094	0.306108	0.348029	0.451314	0.492188	0.620453	0.778217	0.984375	1.23047	1.57577	2.34313	3.04401	4.23396
0.0557469	0.162699	0.229104	0.246094	0.246094	0.308209	0.348029	0.45411	0.492188	0.624632	0.778217	0.984375	1.23047	1.57577	2.34373	3.04401	4.2342
0.0558454	0.162785	0.229283	0.246094	0.246094	0.308252	0.348388	0.454521	0.492188	0.62632	0.778217	0.984375	1.23047	1.57577	2.34423	3.04603	4.24908
0.0559735	0.163122	0.229789	0.246094	0.246094	0.308693	0.349646	0.454802	0.492188	0.632005	0.778217	0.984375	1.23047	1.57577	2.34448	3.05062	4.29784
0.0559851	0.163204	0.229911	0.246094	0.246094	0.308727	0.351045	0.4552	0.492188	0.632399	0.778217	0.984375	1.23047	1.57577	2.34682	3.05182	4.30108
0.0561488	0.163294	0.230003	0.246094	0.246094	0.309744	0.351184	0.455767	0.492188	0.633499	0.778217	0.984375	1.23047	1.57577	2.36256	3.05573	4.30488
0.0564392	0.163438	0.230369	0.246094	0.246094	0.310301	0.351509	0.456588	0.492188	0.634458	0.778217	0.984375	1.23047	1.57577	2.36303	3.07565	4.30488
0.0566171	0.163536	0.230413	0.246094	0.246094	0.310541	0.351796	0.457239	0.492188	0.635679	0.778217	0.984375	1.23047	1.57577	2.36662	3.08036	4.30488
0.0566278	0.164377	0.230482	0.246094	0.246094	0.310661	0.352391	0.459335	0.492188	0.638869	0.778217	0.984375	1.23047	1.57577	2.37191	3.08355	4.30488
0.0566316	0.164848	0.230505	0.246094	0.246094	0.310814	0.35254	0.459893	0.492188	0.639166	0.778217	0.984375	1.23047	1.57577	2.37222	3.08355	4.30983
0.0566717	0.164967	0.230656	0.246094	0.246094	0.311278	0.352946	0.460116	0.492188	0.639401	0.778217	0.984375	1.23047	1.57577	2.37629	3.08355	4.33682
0.0571332	0.165196	0.230802	0.246094	0.246094	0.311661	0.35388	0.460495	0.492188	0.639672	0.778217	0.984375	1.23047	1.57577	2.37818	3.08355	4.36079
0.0572094	0.1652	0.231333	0.246094	0.246094	0.313213	0.354323	0.461475	0.492188	0.640477	0.778217	0.992446	1.23047	1.57577	2.3818	3.08517	4.36079
0.0573736	0.166557	0.231539	0.246094	0.246094	0.313403	0.355495	0.461826	0.492188	0.64154	0.778217	1.00201	1.23047	1.57577	2.38856	3.08554	4.36079
0.057535	0.166651	0.231544	0.246094	0.246094	0.313536	0.355946	0.462172	0.492188	0.642861	0.778217	1.00245	1.23047	1.57577	2.38893	3.09325	4.37042
0.057895	0.167357	0.23164	0.246094	0.246094	0.314047	0.356593	0.462395	0.492188	0.643486	0.778217	1.00897	1.23047	1.57577	2.38971	3.09403	4.3772
0.0581074	0.167455	0.231864	0.246094	0.246094	0.314317	0.357087	0.463131	0.492188	0.643745	0.778217	1.00948	1.23047	1.57898	2.40006	3.09542	4.38157
0.0583975	0.167612	0.232223	0.246094	0.246094	0.316919	0.357307	0.463557	0.492188	0.647667	0.778217	1.01467	1.23047	1.58953	2.40676	3.10009	4.38157
0.0585044	0.16769	0.232623	0.246094	0.246094	0.317257	0.357334	0.464258	0.492188	0.64816	0.778217	1.01467	1.23047	1.59543	2.41011	3.10034	4.38157
0.0591093	0.168118	0.232647	0.246094	0.246094	0.317356	0.359175	0.464534	0.492188	0.649525	0.778217	1.01467	1.23077	1.60212	2.41265	3.10039	4.40226
0.0596268	0.16853	0.232661	0.246094	0.246094	0.31854	0.361528	0.464606	0.492188	0.651297	0.778217	1.01467	1.23401	1.60882	2.41357	3.1077	4.4069
0.0598582	0.168709	0.233567	0.246094	0.246094	0.318721	0.361766	0.4671	0.492188	0.651876	0.778217	1.01467	1.23709	1.61161	2.42083	3.10832	4.41919
0.0598697	0.168782	0.233648	0.246094	0.246094	0.319363	0.363481	0.469114	0.492834	0.65522	0.778217	1.01467	1.23975	1.61207	2.42292	3.1147	4.42459
0.0598905	0.168872	0.233674	0.246094	0.246094	0.319633	0.364749	0.469272	0.493585	0.656558	0.778217	1.01467	1.24093	1.61338	2.42374	3.11482	4.43143
0.0600441	0.168953	0.233808	0.246094	0.246094	0.320984	0.365183	0.471495	0.494208	0.657756	0.778217	1.01467	1.243	1.61397	2.42374	3.11916	4.43652
0.0600474	0.169196	0.233814	0.246094	0.246094	0.322472	0.367504	0.472245	0.498864	0.659605	0.778217	1.01467	1.24305	1.61549	2.42374	3.11974	4.43652
0.0602022	0.169321	0.234183	0.246094	0.246094	0.324556	0.368277	0.473201	0.499531	0.665554	0.778217	1.01467	1.24337	1.62783	2.42374	3.12575	4.43652
0.0603306	0.169533	0.234715	0.246094	0.246094	0.326211	0.369046	0.473513	0.502884	0.666764	0.778217	1.01467	1.24748	1.63557	2.42374	3.12732	4.43652
0.0603497	0.169683	0.235088	0.246094	0.246094	0.326979	0.369664	0.473588	0.50336	0.670323	0.778217	1.01467	1.24936	1.64901	2.42374	3.13226	4.43652
0.0603627	0.169861	0.235162	0.246094	0.246094	0.327192	0.369799	0.47364	0.503426	0.670806	0.778217	1.01467	1.25391	1.65027	2.42374	3.13437	4.43652
0.0606093	0.170526	0.23552	0.246094	0.246094	0.327235	0.370491	0.474576	0.509014	0.6721	0.779247	1.01467	1.25484	1.65085	2.42374	3.13643	4.43652
0.0606555	0.170573	0.235553	0.246094	0.246094	0.327361	0.371244	0.476553	0.510514	0.67261	0.782708	1.01467	1.25484	1.65085	2.42374	3.14643	4.43652
0.0606791	0.170676	0.235891	0.246094	0.246094	0.327722	0.371338	0.481509	0.510945	0.673795	0.784108	1.01467	1.25484	1.65085	2.42429	3.1488	4.43652
0.0606992	0.170742	0.23628	0.246094	0.246094	0.328055	0.372441	0.48246	0.511542	0.675041	0.785709	1.01467	1.25484	1.65085	2.43443	3.15154	4.43652
0.0608628	0.170853	0.236557	0.246094	0.246094	0.328307	0.37362	0.484404	0.512079	0.677408	0.789026	1.01467	1.25484	1.65085	2.43552	3.15154	4.43652
0.0610831	0.170912	0.236569	0.246094	0.246094	0.328925	0.373798	0.484698	0.51327	0.681844	0.800985	1.01467	1.25484	1.65085	2.4362	3.15154	4.46301
0.061359	0.17126	0.236901	0.246094	0.246094	0.331197	0.373912	0.485636	0.516705	0.68303	0.808893	1.01467	1.25484	1.65801	2.4362	3.15154	4.51768
0.0613726	0.171345	0.237062	0.246094	0.246094	0.332234	0.374877	0.485932	0.520231	0.683492	0.812026	1.01467	1.25484	1.66895	2.4362	3.15154	4.51768
0.0613995	0.171422	0.237811	0.246094	0.246094	0.333363	0.375673	0.485963	0.521088	0.686728	0.818049	1.01467	1.25484	1.6801	2.4362	3.15154	4.52438
0.0617108	0.171498	0.23782	0.246094	0.246094	0.333751	0.37579	0.486248	0.522943	0.689197	0.819568	1.01467	1.25484	1.68031	2.4362	3.15154	4.52736
0.0620283	0.171578	0.238218	0.246094	0.246094	0.333876	0.377087	0.486406	0.523819	0.692464	0.824797	1.01467	1.25484	1.68233	2.44438	3.15154	4.57334
0.0620539	0.171618	0.239135	0.246094	0.246094	0.335513	0.377104	0.48946	0.524294	0.693722	0.830898	1.01467	1.25484	1.68299	2.45973	3.15214	4.59741
0.0621971	0.171883	0.239157	0.246094	0.246094	0.335729	0.378785	0.490199	0.527879	0.695013	0.831112	1.01674	1.25484	1.69179	2.46094	3.16318	4.60225
0.0623373	0.171998	0.23938	0.246094	0.246094	0.336613	0.378918	0.490972	0.528825	0.695219	0.834265	1.01716	1.25484	1.69213	2.46094	3.16631	4.62748
0.0624546	0.172023	0.239623	0.246094	0.246094	0.337	0.382033	0.491075	0.53032	0.696058	0.838052	1.02511	1.25484	1.69567	2.46094	3.17377	4.637
0.062766	0.172266	0.239749	0.246094	0.247237	0.337248	0.38334	0.491351	0.530818	0.696058	0.839698	1.02533	1.25484	1.7056	2.46094	3.19145	4.64329
0.0632001	0.172452	0.240155	0.246094	0.247307	0.337325	0.383481	0.492188	0.532101	0.696058	0.839912	1.02674	1.25484	1.71934	2.46094	3.1928	4.64329
0.0632974	0.172827	0.240188	0.246094	0.247447	0.337374	0.38362	0.492188	0.533152	0.696058	0.840242	1.02851	1.25484	1.72266	2.46094	3.19922	4.65515
0.0633625	0.173216	0.240193	0.246094	0.247468	0.337778	0.384393	0.492188	0.533412	0.696058	0.843291	1.0418	1.25484	1.72266	2.46094	3.19922	4.6693
0.06359	0.173495	0.24033	0.246094	0.24818	0.338037	0.385773	0.492188	0.534679	0.696058	0.843956	1.04409	1.25484	1.72266	2.46094	3.19922	4.6693
0.0637384	0.173521	0.240529	0.246094	0.248338	0.338055	0.385968	0.492188	0.535625	0.696058	0.845258	1.04409	1.25484	1.72266	2.47007	3.19922	4.72731
0.0637778	0.173581	0.240564	0.246094	0.250158	0.338233	0.3864	0.492188	0.535807	0.696058	0.847887	1.04409	1.25484	1.72266	2.47311	3.19922	4.73371
0.0643977	0.174025	0.24075	0.246094	0.250576	0.341078	0.387009	0.492188	0.536658	0.696058	0.848747	1.04409	1.25484	1.72266	2.47321	3.19922	4.73371
0.0646091	0.174181	0.241054	0.246094	0.251998	0.341392	0.387163	0.492188	0.537669	0.696058	0.852477	1.04409	1.25484	1.72266	2.47321	3.20867	4.73371
0.0648598	0.174204	0.241174	0.246094	0.253098	0.341403	0.387319	0.492188	0.539225	0.696058	0.853029	1.04409	1.25484	1.72266	2.47321	3.20867	4.74959
0.0651299	0.174255	0.241488	0.246094	0.254344	0.341539	0.388687	0.492188	0.53972	0.696058	0.858709	1.04409	1.25484	1.72266	2.47441	3.20867	4.75286
0.0653262	0.174939	0.241664	0.246094	0.255292	0.341737	0.389125	0.492188	0.539772	0.696058	0.858966	1.04409	1.25484	1.72369	2.47455	3.20867	4.77179
0.0654583	0.174977	0.2417	0.246094	0.255533	0.34194	0.3894	0.492188	0.540089	0.696058	0.860064	1.04409	1.25484	1.72701	2.4774	3.20867	4.77828
0.0659605	0.174999	0.241722	0.246094	0.257079	0.342964	0.389494	0.492188	0.541407	0.696058	0.861863	1.05364	1.25484	1.73568	2.47905	3.20867	4.77828
0.0660262	0.175029	0.243043	0.246094	0.257238	0.343501	0.390197	0.492188	0.544493	0.696058	0.864661	1.05534	1.25484	1.73873	2.48254	3.2087	4.77828
0.0660546	0.175048	0.243316	0.246094	0.257313	0.343776	0.390229	0.492188	0.547117	0.696058	0.872316	1.05714	1.25484	1.74015	2.48529	3.2119	4.77828
0.0666823	0.175111	0.243393	0.246094	0.258775	0.343983	0.390231	0.492188	0.548154	0.696058	0.873116	1.0572	1.25484	1.74015	2.48667	3.21393	4.83498
0.0667596	0.175549	0.243697	0.246094	0.259198	0.344229	0.390544	0.492188	0.548694	0.696058	0.879481	1.05767	1.25484	1.74015	2.48922	3.21574	4.83498
0.0668367	0.175605	0.243752	0.246094	0.259953	0.344922	0.39161	0.492188	0.550282	0.696058	0.886716	1.06044	1.25484	1.74015	2.49103	3.21704	4.84748
0.0670505	0.175783	0.244649	0.246094	0.261253	0.346511	0.392839	0.492188	0.550282	0.696058	0.887304	1.06522	1.25484	1.74015	2.50055	3.21834	4.85373
0.0670786	0.175837	0.244657	0.246094	0.261427	0.346578	0.394489	0.492188	0.550282	0.696058	0.887304	1.06936	1.25751	1.74015	2.50322	3.22408	4.90338
0.0670867	0.175842	0.244816	0.246094	0.261482	0.347963	0.394558	0.492188	0.550282	0.696058	0.887304	1.07376	1.25884	1.74015	2.50967	3.23622	4.90338
0.0671328	0.175852	0.245242	0.246094	0.26231	0.347996	0.394863	0.492188	0.550282	0.696058	0.887304	1.0786	1.25978	1.74015	2.50967	3.23656	4.90338
0.0671764	0.176101	0.246094	0.246094	0.262584	0.348029	0.395216	0.492188	0.550282	0.696542	0.887304	1.08902	1.26688	1.74015	2.50967	3.23686	4.90338
0.0676405	0.176286	0.246094	0.246094	0.263468	0.348029	0.395467	0.492188	0.550282	0.697058	0.887304	1.09222	1.26971	1.74015	2.50967	3.23686	4.91671
0.067712	0.176311	0.246094	0.246094	0.263801	0.348029	0.396684	0.492188	0.550282	0.702431	0.887304	1.09356	1.27214	1.74015	2.50967	3.23686	4.95254
0.0677658	0.176675	0.246094	0.246094	0.26387	0.348029	0.396979	0.492188	0.550282	0.706374	0.887304	1.09873	1.27861	1.74015	2.51505	3.23686	4.95254
0.067888	0.176749	0.246094	0.246094	0.263978	0.348029	0.397436	0.492188	0.550282	0.707789	0.887304	1.09921	1.28406	1.74015	2.51918	3.23924	4.95254
0.0679772	0.176883	0.246094	0.246094	0.264047	0.348029	0.397756	0.492188	0.550282	0.709932	0.887304	1.09944	1.28583	1.74015	2.53248	3.24255	4.95254
0.0680272	0.177096	0.246094	0.246094	0.26411	0.348029	0.3993	0.492188	0.550282	0.710851	0.887304	1.10056	1.28729	1.74015	2.533	3.24817	4.98302
0.0681348	0.177376	0.246094	0.246094	0.26456	0.348029	0.399451	0.492188	0.550282	0.716317	0.887304	1.10056	1.29052	1.74015	2.53301	3.25759	4.99471
0.0681952	0.177985	0.246094	0.246094	0.26464	0.348029	0.400599	0.492188	0.550282	0.717169	0.887304	1.10056	1.29308	1.74015	2.53369	3.2604	5.06738
0.0685169	0.178013	0.246094	0.246094	0.264974	0.348029	0.400893	0.492188	0.550282	0.719439	0.887304	1.10056	1.29365	1.74015	2.53369	3.26737	5.06738
0.068734	0.178029	0.246094	0.246094	0.266154	0.348029	0.401309	0.492188	0.550282	0.719465	0.887304	1.10056	1.29476	1.74015	2.53369	3.27036	5.06738
0.0687356	0.178252	0.246094	0.246094	0.266615	0.348029	0.401571	0.492188	0.550282	0.720914	0.887304	1.10056	1.29792	1.75218	2.53369	3.27712	5.07335
0.0687863	0.17841	0.246094	0.246094	0.266882	0.348029	0.401731	0.492188	0.550282	0.723427	0.887304	1.10056	1.30074	1.75323	2.53369	3.2833	5.07335
0.0690068	0.178887	0.246094	0.246094	0.267659	0.348029	0.403358	0.492188	0.550282	0.725116	0.887304	1.10056	1.3009	1.75748	2.53369	3.2833	5.17382
0.0690613	0.17921	0.246094	0.246094	0.267706	0.348029	0.403451	0.492188	0.550282	0.72562	0.887304	1.10056	1.31043	1.77014	2.53369	3.28497	5.17382
0.0691142	0.179497	0.246094	0.246094	0.267875	0.348029	0.403859	0.492188	0.550282	0.726822	0.887304	1.10056	1.3109	1.77064	2.53369	3.30169	5.17382
0.069156	0.179701	0.246094	0.246094	0.267919	0.348029	0.404237	0.492188	0.550282	0.726927	0.887304	1.10056	1.32526	1.77112	2.53532	3.30169	5.20291
0.069285	0.179724	0.246094	0.246094	0.26835	0.348029	0.406073	0.492188	0.550282	0.727478	0.887304	1.10056	1.32526	1.77218	2.53539	3.30169	5.24855
0.0693082	0.180162	0.246094	0.246094	0.269711	0.348029	0.406249	0.492188	0.550282	0.728121	0.887304	1.10056	1.32526	1.77328	2.54011	3.30217	5.26664
0.0693548	0.180472	0.246094	0.246094	0.269733	0.348029	0.406331	0.492188	0.550282	0.728218	0.887304	1.10056	1.32526	1.77461	2.54022	3.30328	5.26664
0.0693995	0.180599	0.246094	0.246094	0.270182	0.348029	0.407863	0.492188	0.550282	0.729537	0.887304	1.10056	1.32526	1.77461	2.5408	3.30611	5.28386
0.0694779	0.180602	0.246094	0.246094	0.270448	0.348029	0.408119	0.492188	0.550282	0.735536	0.887304	1.10056	1.32526	1.77461	2.54369	3.31085	5.28386
0.0695885	0.180657	0.246094	0.246094	0.270463	0.348029	0.408178	0.492188	0.550282	0.738281	0.887304	1.10056	1.32526	1.77461	2.54569	3.31085	5.30102
0.0697538	0.181192	0.246094	0.246094	0.27051	0.348029	0.408594	0.492188	0.550282	0.738281	0.887875	1.10056	1.32526	1.77461	2.54792	3.31085	5.31243
0.0699509	0.181311	0.246094	0.246094	0.27076	0.348029	0.409203	0.492188	0.550282	0.738281	0.896703	1.10056	1.32526	1.77461	2.54964	3.31085	5.37477
0.0701679	0.181527	0.246094	0.246094	0.271994	0.348029	0.40994	0.492188	0.550282	0.738281	0.905265	1.10056	1.32526	1.78095	2.5537	3.31085	5.37477
0.0702142	0.181879	0.246094	0.246094	0.272844	0.348029	0.412318	0.492188	0.550282	0.738281	0.907912	1.10056	1.32526	1.78385	2.56331	3.31085	5.39726
0.0702823	0.181981	0.246094	0.246094	0.273329	0.348029	0.414568	0.492188	0.550282	0.738281	0.908355	1.10056	1.32526	1.78768	2.56555	3.31085	5.44293
0.0706673	0.182066	0.246094	0.246094	0.273682	0.348029	0.415064	0.492188	0.550282	0.738281	0.911562	1.10056	1.32526	1.7883	2.56832	3.33892	5.50282
0.0707403	0.182102	0.246094	0.246094	0.274794	0.348029	0.415495	0.492188	0.550282	0.738281	0.915584	1.10056	1.32526	1.78862	2.56929	3.34724	5.50282
0.0714096	0.182292	0.246094	0.246094	0.275348	0.348029	0.41677	0.492188	0.550282	0.738281	0.919487	1.10072	1.32526	1.79159	2.56929	3.34724	5.5238
0.0716511	0.182354	0.246094	0.246094	0.276448	0.348029	0.418616	0.492188	0.550282	0.738281	0.923042	1.10526	1.32526	1.79159	2.56929	3.34724	5.55213
0.0719593	0.182398	0.246094	0.246094	0.276451	0.348029	0.420593	0.492188	0.550282	0.738281	0.923233	1.10548	1.32526	1.79159	2.56929	3.35792	5.57788
0.0723241	0.182574	0.246094	0.246094	0.276453	0.348029	0.420771	0.492188	0.550282	0.738281	0.925898	1.10744	1.32526	1.79159	2.56929	3.36167	5.6118
0.0724875	0.182662	0.246094	0.246094	0.277113	0.348029	0.421334	0.492188	0.550282	0.738281	0.927398	1.11254	1.32526	1.79555	2.56929	3.36955	5.62258
0.0730869	0.182956	0.246094	0.246094	0.277206	0.348029	0.424143	0.492188	0.550282	0.738281	0.927755	1.11833	1.32526	1.79847	2.56929	3.37816	5.6616
0.0733692	0.183121	0.246094	0.246094	0.278299	0.348029	0.424167	0.492188	0.550282	0.738281	0.932012	1.1247	1.32526	1.79926	2.56952	3.37891	5.76312
0.0734421	0.183153	0.246094	0.246094	0.279684	0.348029	0.428798	0.492188	0.550282	0.738281	0.937163	1.12603	1.32932	1.80619	2.57107	3.38339	5.81706
0.0737547	0.183238	0.246094	0.246094	0.27981	0.348029	0.429692	0.492188	0.550282	0.738281	0.939528	1.13364	1.33032	1.81206	2.57835	3.38755	5.84363
0.0739635	0.183519	0.246094	0.246094	0.281259	0.348029	0.430252	0.492188	0.550282	0.738281	0.939895	1.1371	1.33289	1.81617	2.57864	3.39452	5.85505
0.0740288	0.183608	0.246094	0.246094	0.281385	0.348029	0.430762	0.492188	0.550282	0.738281	0.948904	1.13802	1.33405	1.82777	2.57902	3.3985	5.85826
0.0741785	0.183782	0.246094	0.246094	0.281978	0.348029	0.431259	0.492188	0.550282	0.738281	0.95036	1.141	1.33561	1.83402	2.57956	3.40548	5.9573
0.0741998	0.183839	0.246094	0.246094	0.282583	0.348029	0.432314	0.492188	0.550282	0.738281	0.951124	1.14523	1.33742	1.83519	2.5799	3.40549	5.9573
0.0742616	0.183846	0.246094	0.246094	0.284164	0.348029	0.433175	0.492188	0.550282	0.738281	0.951228	1.15315	1.33973	1.83668	2.58114	3.41884	5.96909
0.074851	0.183909	0.246094	0.246094	0.284441	0.348029	0.433179	0.492188	0.550282	0.738281	0.952278	1.15343	1.34535	1.83729	2.58175	3.42242	6.06989
0.0749157	0.183992	0.246094	0.246094	0.284598	0.348029	0.435491	0.492188	0.550282	0.738281	0.95457	1.15778	1.34653	1.84148	2.58201	3.42738	6.16592
0.0749865	0.184664	0.246094	0.246094	0.285759	0.348029	0.440354	0.492188	0.550282	0.738281	0.958886	1.15784	1.35568	1.84854	2.58341	3.42769	6.21113
0.0750074	0.184802	0.246094	0.246094	0.285818	0.348029	0.441	0.492188	0.550282	0.738281	0.961935	1.15908	1.36004	1.85068	2.58673	3.42769	6.21113
0.0750342	0.184871	0.246094	0.246094	0.286234	0.348029	0.44107	0.492188	0.550282	0.738281	0.964317	1.16048	1.36103	1.85112	2.59058	3.42769	6.22437
0.0750519	0.184963	0.246094	0.246094	0.286947	0.348029	0.441249	0.492188	0.550282	0.738281	0.965706	1.16107	1.36289	1.85161	2.59066	3.42769	6.2633
0.0750918	0.185033	0.246094	0.246094	0.287206	0.348029	0.441528	0.492188	0.550282	0.738281	0.967586	1.17462	1.366	1.85675	2.59343	3.42769	6.35094
0.0751877	0.185221	0.246094	0.246094	0.287646	0.348029	0.441897	0.492188	0.550282	0.738281	0.967734	1.17752	1.36835	1.86643	2.59398	3.42769	6.35094
0.0751949	0.185392	0.246094	0.246094	0.288383	0.348029	0.442353	0.492188	0.550282	0.738281	0.968574	1.17855	1.37616	1.86706	2.59606	3.43093	6.42665
0.0751969	0.185559	0.246094	0.246094	0.288524	0.348029	0.44321	0.492188	0.550282	0.738281	0.971436	1.17892	1.37688	1.8685	2.59948	3.44716	6.44327
0.0753194	0.185683	0.246094	0.246094	0.288705	0.348029	0.444655	0.492188	0.550282	0.738281	0.973278	1.18099	1.38009	1.87183	2.60393	3.44828	6.69421
0.075526	0.185956	0.246094	0.246094	0.28893	0.348029	0.444805	0.492188	0.550282	0.738281	0.975018	1.182	1.38046	1.87368	2.60705	3.44834	6.83663
0.0757998	0.186079	0.246094	0.246094	0.289233	0.348029	0.445176	0.492188	0.550282	0.738281	0.975323	1.18296	1.38401	1.87419	2.61601	3.45409	7.08386
0.0759191	0.186165	0.246094	0.246094	0.290537	0.348029	0.445713	0.492188	0.550282	0.738281	0.975748	1.18465	1.38554	1.87419	2.61601	3.45409	7.78217
0.0759435	0.1864	0.246094	0.246094	0.290816	0.348029	0.446906	0.492188	0.550282	0.738281	0.97721	1.18495	1.38742	1.87419	2.61601	3.45409	7.94391
0.0760975	0.186587	0.246094	0.246094	0.291109	0.348029	0.447065	0.492188	0.550282	0.738281	0.9836	1.18558	1.38991	1.87419	2.61871	3.45686	7.94391
0.0762796	0.18677	0.246094	0.246094	0.292171	0.348029	0.447586	0.492188	0.550282	0.738281	0.984375	1.18602	1.39163	1.87419	2.61955	3.46549	8.01601
0.0763085	0.186924	0.246094	0.246094	0.292205	0.348029	0.447752	0.492188	0.550282	0.738281	0.984375	1.18812	1.39212	1.87419	2.62171	3.47399	8.01601
0.0764897	0.18702	0.246094	0.246094	0.293376	0.348029	0.448075	0.492188	0.550282	0.738281	0.984375	1.19009	1.39212	1.87419	2.62393	3.48029	8.04617
0.07655	0.187056	0.246094	0.246094	0.293405	0.348029	0.44826	0.492188	0.550282	0.738281	0.984375	1.19218	1.39212	1.87419	2.6244	3.48029	8.09495
0.0765664	0.18728	0.246094	0.246094	0.293469	0.348029	0.448761	0.492188	0.550282	0.738281	0.984375	1.19247	1.39212	1.87419	2.62445	3.48029	8.14715
0.0766431	0.187539	0.246094	0.246094	0.294031	0.348029	0.449727	0.492188	0.550282	0.738281	0.984375	1.19563	1.39212	1.87419	2.62504	3.48029	8.14715
0.0767877	0.187558	0.246094	0.246094	0.294943	0.348029	0.450034	0.492188	0.550282	0.738281	0.984375	1.19695	1.39212	1.87527	2.62912	3.48029	8.25424
0.0768338	0.187657	0.246094	0.246094	0.294957	0.348029	0.450768	0.492188	0.550282	0.738281	0.984375	1.1971	1.39212	1.88741	2.63138	3.49464	11.448
0.0768406	0.187716	0.246094	0.246094	0.295209	0.348029	0.451923	0.492188	0.550282	0.738281	0.984375	1.19742	1.39212	1.89115	2.63684	3.49663	11.6707
0.0770743	0.187868	0.246094	0.246094	0.295516	0.348029	0.45203	0.492188	0.550282	0.738281	0.984375	1.19986	1.39233	1.89693	2.63922	3.49765	11.7945
0.0771151	0.187942	0.246094	0.246094	0.295957	0.348029	0.452057	0.492188	0.550282	0.738281	0.984375	1.20374	1.3947	1.89772	2.64633	3.49765	11.8176
0.0772721	0.187997	0.246094	0.246094	0.296003	0.348029	0.454127	0.492188	0.550282	0.738281	0.984375	1.20423	1.39939	1.90345	2.64716	3.49765	11.9044
0.0773934	0.188288	0.246094	0.246094	0.296024	0.348029	0.456913	0.492188	0.550282	0.738281	0.984375	1.20884	1.40381	1.90502	2.65051	3.49765	12.0209
0.0774246	0.188463	0.246094	0.246094	0.297102	0.348029	0.457538	0.492188	0.550282	0.738281	0.984375	1.22138	1.4047	1.90572	2.65051	3.49765	12.0209
0.0774414	0.188624	0.246094	0.246094	0.297188	0.348029	0.459525	0.492188	0.550282	0.738281	0.984375	1.22415	1.41194	1.90626	2.65496	3.5049	12.2183
0.0774966	0.188689	0.246094	0.246094	0.297356	0.348029	0.45985	0.492188	0.550282	0.738281	0.984375	1.22815	1.41626	1.90853	2.65847	3.52353	12.2207
0.0775212	0.189135	0.246094	0.246094	0.298775	0.348029	0.460074	0.492188	0.550282	0.738281	0.984375	1.22974	1.41698	1.91404	2.66191	3.52353	12.344
0.0775294	0.189435	0.246094	0.246094	0.298925	0.348029	0.462511	0.492188	0.550282	0.738281	0.984375	1.2298	1.41699	1.91573	2.66191	3.5304
0.0775727	0.189815	0.246094	0.246094	0.299305	0.348029	0.463701	0.492188	0.550282	0.738281	0.984375	1.23047	1.42616	1.92205	2.66191	3.54162
0.077618	0.190176	0.246094	0.246094	0.299353	0.348029	0.464922	0.492188	0.550282	0.738281	0.984375	1.23047	1.43199	1.92205	2.66191	3.5574
0.077621	0.190466	0.246094	0.246094	0.299363	0.348029	0.467826	0.492188	0.550282	0.738281	0.984375	1.23047	1.43206	1.92205	2.66429	3.56109
0.077631	0.190497	0.246094	0.246094	0.299827	0.348029	0.468749	0.492188	0.550282	0.738281	0.984375	1.23047	1.43496	1.92205	2.66513	3.56122
0.0776846	0.190521	0.246094	0.246094	0.299885	0.348029	0.470797	0.492188	0.550282	0.738281	0.984375	1.23047	1.43496	1.92205	2.66564	3.56226
0.0777677	0.190754	0.246094	0.246094	0.300185	0.348029	0.470892	0.492188	0.550282	0.738281	0.984375	1.23047	1.43496	1.92205	2.66738	3.58318
0.0777876	0.190969	0.246094	0.246094	0.30061	0.348029	0.471819	0.492188	0.550282	0.738281	0.984375	1.23047	1.43496	1.92205	2.66857	3.58318
0.0778797	0.191138	0.246094	0.246094	0.300774	0.348029	0.471852	0.492188	0.550282	0.738281	0.984375	1.23047	1.43496	1.92205	2.66974	3.58543
0.0781503	0.191275	0.246094	0.246094	0.300847	0.348029	0.472017	0.492188	0.550282	0.738281	0.984375	1.23047	1.43496	1.92205	2.67	3.58645
0.0781855	0.191573	0.246094	0.246094	0.300958	0.348029	0.47314	0.492188	0.550282	0.738281	0.984375	1.23047	1.43496	1.92205	2.67601	3.58903
0.0784557	0.191574	0.246094	0.246094	0.301037	0.348029	0.475592	0.492188	0.550282	0.738281	0.984375	1.23047	1.43496	1.92205	2.67772	3.59424
0.0786296	0.191924	0.246094	0.246094	0.301481	0.348029	0.475706	0.492188	0.550282	0.738281	0.984375	1.23047	1.43496	1.92205	2.68013	3.60321
0.0786793	0.192265	0.246094	0.246094	0.301787	0.348029	0.477353	0.492188	0.551968	0.738281	0.984375	1.23047	1.43496	1.92205	2.68662	3.60626
0.0787884	0.192424	0.246094	0.246094	0.303268	0.348029	0.477673	0.492188	0.554989	0.738281	0.984375	1.23047	1.43496	1.92205	2.69059	3.61978
0.0788861	0.192567	0.246094	0.246094	0.303745	0.348029	0.478529	0.492188	0.555121	0.738281	0.984375	1.23047	1.43496	1.92205	2.69505	3.62301
0.0790206	0.193107	0.246094	0.246094	0.305187	0.348029	0.48208	0.492188	0.557812	0.738281	0.984375	1.23047	1.43496	1.92205	2.69531	3.62618
0.0792396	0.193244	0.246094	0.246094	0.306739	0.348029	0.482944	0.492188	0.5606	0.741104	0.984375	1.23047	1.43496	1.92205	2.69715	3.63353
0.0792775	0.193718	0.246094	0.246094	0.307802	0.348029	0.483194	0.492188	0.561207	0.742827	0.984375	1.23047	1.43496	1.92205	2.69962	3.63353
0.079329	0.194116	0.246094	0.246094	0.308055	0.348029	0.483232	0.492188	0.565311	0.743783	0.984375	1.23047	1.43496	1.92508	2.70233	3.64249
0.0793953	0.194205	0.246094	0.246094	0.308473	0.348029	0.483692	0.492188	0.566765	0.749098	0.986477	1.23047	1.43496	1.9292	2.70703	3.64478
0.0796418	0.194575	0.246094	0.246094	0.309285	0.348029	0.483802	0.492188	0.567166	0.751016	0.986569	1.23047	1.43496	1.92949	2.70703	3.65266
0.0797317	0.194588	0.246094	0.246094	0.309488	0.348029	0.483931	0.492188	0.568302	0.751071	0.993398	1.23047	1.43496	1.92985	2.70703	3.6578
0.0798573	0.195916	0.246094	0.246094	0.30957	0.348029	0.484162	0.492188	0.568916	0.752129	0.99399	1.23047	1.43496	1.93295	2.71017	3.65845
0.079959	0.195937	0.246094	0.246094	0.309888	0.348029	0.484514	0.492188	0.571261	0.755004	0.995789	1.23047	1.43544	1.94442	2.7104	3.65845
0.0799725	0.196348	0.246094	0.246094	0.310286	0.348029	0.484857	0.492188	0.571417	0.762162	0.996061	1.23047	1.43696	1.94607	2.71411	3.65845
0.0801594	0.196629	0.246094	0.246094	0.310365	0.348029	0.48551	0.492188	0.572287	0.764073	1.00161	1.23047	1.43989	1.95287	2.71615	3.65845
0.0802802	0.196708	0.246094	0.246094	0.310522	0.348029	0.485672	0.492188	0.572355	0.764126	1.0021	1.23047	1.44189	1.95422	2.71683	3.65845
0.0802947	0.196742	0.246094	0.246094	0.310529	0.348029	0.485764	0.492188	0.572884	0.771641	1.00587	1.23047	1.44502	1.95821	2.71819	3.65845
0.0805078	0.196795	0.246094	0.246094	0.31061	0.348029	0.48702	0.492188	0.57319	0.771969	1.00721	1.23047	1.44616	1.96328	2.72246	3.65845
0.0805156	0.197129	0.246094	0.246094	0.310906	0.348029	0.489535	0.492188	0.573597	0.776668	1.00781	1.23047	1.44995	1.96875	2.72351	3.65845
0.0805537	0.197206	0.246094	0.246094	0.311216	0.348029	0.490121	0.492188	0.57381	0.778217	1.00802	1.23047	1.45165	1.96875	2.7239	3.65845
0.0806371	0.197287	0.246094	0.246094	0.311971	0.348029	0.490644	0.492188	0.575175	0.778217	1.00864	1.23047	1.45477	1.96875	2.7256	3.65845
0.0806546	0.197367	0.246094	0.246094	0.312041	0.348029	0.490688	0.492188	0.576453	0.778217	1.01242	1.23047	1.455	1.96875	2.73484	3.65845
0.0808147	0.197379	0.246094	0.246094	0.312341	0.348029	0.492188	0.492188	0.576994	0.778217	1.01467	1.23047	1.46042	1.96875	2.73954	3.65845
0.0809526	0.197508	0.246094	0.246094	0.312738	0.348029	0.492188	0.492188	0.57704	0.778217	1.01467	1.23047	1.46383	1.96875	2.7397	3.65845
0.0810546	0.197681	0.246094	0.246094	0.314031	0.348029	0.492188	0.492188	0.577075	0.778217	1.01467	1.23047	1.46532	1.96875	2.75141	3.65845
0.0811555	0.197961	0.246094	0.246094	0.314297	0.348029	0.492188	0.492188	0.577076	0.778217	1.01467	1.23047	1.47348	1.96875	2.75141	3.66466
0.0811614	0.198314	0.246094	0.246094	0.315173	0.348029	0.492188	0.492188	0.57723	0.778217	1.01467	1.23047	1.47441	1.96875	2.75141	3.67814
0.0812118	0.198413	0.246094	0.246094	0.315188	0.348029	0.492188	0.492188	0.578114	0.778217	1.01467	1.23047	1.47479	1.97399	2.75141	3.68441
0.0812394	0.198813	0.246094	0.246094	0.316059	0.348029	0.492188	0.492188	0.578563	0.778217	1.01467	1.23047	1.47648	1.98407	2.75141	3.68484
0.0813497	0.198949	0.246094	0.246094	0.316267	0.348029	0.492188	0.492188	0.578723	0.778217	1.01467	1.23047	1.47656	1.98407	2.75436	3.68888
0.081353	0.198966	0.246094	0.246094	0.318215	0.348029	0.492188	0.492826	0.579351	0.778217	1.01467	1.23047	1.47656	1.98407	2.75482	3.69141
0.0815262	0.199202	0.246094	0.246094	0.31845	0.348029	0.492188	0.492897	0.579498	0.778217	1.01467	1.23047	1.47656	1.98407	2.77078	3.69141
0.0815328	0.199262	0.246094	0.246094	0.318679	0.348029	0.492188	0.493619	0.580115	0.778217	1.01467	1.23047	1.47656	1.98407	2.77329	3.69141
0.0815958	0.199408	0.246094	0.246094	0.318687	0.348029	0.492188	0.494204	0.580609	0.778217	1.01467	1.23047	1.47656	1.98407	2.77347	3.69141
0.0817268	0.199416	0.246094	0.246094	0.31884	0.348029	0.492188	0.494506	0.584857	0.778217	1.01467	1.23047	1.47656	1.99921	2.77397	3.69141
0.0819496	0.199512	0.246094	0.246094	0.318877	0.348029	0.492188	0.496591	0.585589	0.778217	1.01467	1.23047	1.47656	2.00579	2.77526	3.69328
0.0819644	0.199593	0.246094	0.246094	0.319524	0.348029	0.492188	0.497257	0.58773	0.778217	1.01467	1.23047	1.47656	2.01394	2.77563	3.69675
0.0821044	0.19972	0.246094	0.246094	0.319705	0.348029	0.492188	0.498338	0.590756	0.778217	1.01467	1.23047	1.47656	2.01758	2.78217	3.6996
0.0821559	0.199788	0.246094	0.246094	0.320341	0.348029	0.492188	0.499167	0.591931	0.778217	1.01467	1.23047	1.47656	2.02934	2.78303	3.6996
0.0824804	0.20003	0.246094	0.246094	0.320984	0.348029	0.492188	0.499246	0.59301	0.778217	1.01467	1.23047	1.47656	2.02934	2.78423	3.6996
0.0826714	0.200212	0.246094	0.246094	0.321304	0.348029	0.492188	0.499247	0.596578	0.778217	1.01467	1.23047	1.47803	2.02934	2.78423	3.72224
0.082786	0.200296	0.246094	0.246094	0.321646	0.348029	0.492188	0.503035	0.597234	0.778217	1.01467	1.23047	1.48343	2.02961	2.78423	3.72353
0.0828509	0.200316	0.246094	0.246094	0.322937	0.348029	0.492188	0.50312	0.599797	0.778217	1.01467	1.23047	1.48654	2.03031	2.79598	3.72407
0.0828728	0.200765	0.246094	0.246094	0.325484	0.348029	0.492188	0.504767	0.600006	0.778217	1.01467	1.23047	1.48718	2.03102	2.80059	3.72407
0.0831136	0.200878	0.246094	0.246094	0.325609	0.348029	0.492188	0.505333	0.601594	0.778217	1.01467	1.2315	1.4877	2.03856	2.8059	3.72543
0.0831405	0.201369	0.246094	0.246094	0.325638	0.348029	0.492188	0.506111	0.603142	0.778217	1.01467	1.23554	1.48956	2.03904	2.8059	3.73298
0.0831819	0.201486	0.246094	0.246094	0.326938	0.348029	0.492188	0.507762	0.603153	0.778217	1.01467	1.23601	1.49655	2.04009	2.8059	3.7371
0.0833137	0.201598	0.246094	0.246094	0.32694	0.348029	0.492188	0.511021	0.60445	0.778217	1.01467	1.23707	1.49676	2.04463	2.8059	3.7454
0.0834272	0.202127	0.246094	0.246094	0.327165	0.348029	0.492188	0.514667	0.604929	0.778217	1.01467	1.239	1.49693	2.04561	2.8059	3.74839
0.0836447	0.202224	0.246094	0.246094	0.328516	0.348029	0.492188	0.514863	0.60537	0.778217	1.01467	1.24584	1.49693	2.05568	2.8059	3.74839
0.0836796	0.202564	0.246094	0.246094	0.328521	0.348029	0.492188	0.515096	0.606788	0.778217	1.01467	1.24903	1.49693	2.05768	2.812	3.74865
0.0838245	0.20257	0.246094	0.246094	0.329673	0.348029	0.492188	0.515314	0.608786	0.778217	1.01467	1.24927	1.49693	2.06549	2.81339	3.75248
0.0839185	0.202761	0.246094	0.246094	0.329749	0.348071	0.492188	0.515408	0.61041	0.778217	1.01467	1.25132	1.49693	2.06907	2.81435	3.75646
0.0839289	0.203283	0.246094	0.246094	0.329774	0.349341	0.492188	0.516411	0.61466	0.778217	1.01467	1.25299	1.49693	2.06931	2.81548	3.75737
0.0841713	0.20339	0.246094	0.246094	0.329881	0.350693	0.492188	0.516674	0.614668	0.778217	1.01467	1.25392	1.49693	2.07021	2.82051	3.76451
0.084346	0.203501	0.246094	0.246094	0.330294	0.351834	0.492188	0.516944	0.614981	0.778217	1.01467	1.25484	1.49693	2.0726	2.82806	3.76451
0.0843815	0.203526	0.246094	0.246094	0.330727	0.352358	0.492188	0.518321	0.616368	0.778217	1.01467	1.25484	1.49693	2.07352	2.83239	3.77991
0.0843843	0.203584	0.246094	0.246094	0.331017	0.353199	0.492188	0.518524	0.618758	0.778217	1.01467	1.25484	1.49693	2.07726	2.8331	3.78958
0.0845102	0.203978	0.246094	0.246094	0.331328	0.353346	0.492188	0.519527	0.619995	0.778217	1.015	1.25484	1.49693	2.07875	2.8357	3.80197
0.0845131	0.204122	0.246094	0.246094	0.333225	0.353826	0.492188	0.520758	0.621645	0.778217	1.01538	1.25484	1.49693	2.08168	2.83844	3.8204
0.0846291	0.204179	0.246094	0.246094	0.333305	0.354252	0.492188	0.522195	0.622024	0.778217	1.02152	1.25484	1.4997	2.08498	2.84315	3.8204
0.0850136	0.204275	0.246094	0.246094	0.333341	0.354565	0.492188	0.5248	0.622811	0.778217	1.02265	1.25484	1.5028	2.08612	2.84454	3.8204
0.0851763	0.204339	0.246094	0.246094	0.333346	0.354688	0.492188	0.525938	0.625217	0.778217	1.02543	1.25484	1.50652	2.08817	2.84591	3.82832
0.0851835	0.205761	0.246094	0.246094	0.333349	0.355636	0.492188	0.526164	0.629158	0.778217	1.02829	1.25484	1.50772	2.08817	2.84644	3.83059
0.0852775	0.20582	0.246094	0.246094	0.334398	0.357636	0.492188	0.526712	0.629683	0.778217	1.02934	1.25484	1.5101	2.0932	2.84707	3.83316
0.0855264	0.205981	0.246094	0.246094	0.334582	0.357954	0.492188	0.529163	0.630741	0.778217	1.03106	1.25484	1.51527	2.10263	2.84919	3.83806
0.0855368	0.206003	0.246094	0.246094	0.335186	0.358041	0.492188	0.530291	0.632076	0.778217	1.03107	1.25484	1.51633	2.10263	2.8523	3.84411
0.0856472	0.206034	0.246094	0.246094	0.335609	0.358512	0.492188	0.532691	0.632313	0.778217	1.03337	1.25484	1.51681	2.10263	2.85485	3.84411
0.0857696	0.206036	0.246094	0.246094	0.336022	0.359184	0.492188	0.532915	0.632954	0.778217	1.04027	1.25484	1.52462	2.10263	2.85591	3.84411
0.0859249	0.206302	0.246094	0.246094	0.336318	0.359334	0.492188	0.533988	0.634957	0.778217	1.04373	1.25484	1.52547	2.10263	2.85886	3.84411
0.0860358	0.206808	0.246094	0.246094	0.337159	0.359513	0.492188	0.535253	0.635075	0.778217	1.04409	1.25484	1.52781	2.11444	2.86024	3.84411
0.086185	0.206819	0.246094	0.246094	0.3372	0.359671	0.492188	0.537387	0.638248	0.778217	1.04409	1.25484	1.52832	2.11569	2.86044	3.84411
0.0862123	0.20691	0.246094	0.246094	0.337253	0.359832	0.492188	0.538472	0.639774	0.778217	1.04409	1.25484	1.5429	2.11698	2.8641	3.84411
0.0862307	0.207046	0.246094	0.246094	0.337318	0.360274	0.492188	0.538946	0.640185	0.778625	1.04409	1.25484	1.54501	2.11698	2.8663	3.84411
0.0862445	0.207068	0.246094	0.246094	0.337374	0.360436	0.492188	0.541248	0.640865	0.77883	1.04409	1.25484	1.54774	2.11698	2.86992	3.84411
0.086247	0.207425	0.246094	0.246094	0.337405	0.361553	0.492188	0.542991	0.641618	0.780286	1.04409	1.25484	1.55477	2.11698	2.86992	3.85198
0.0867858	0.207504	0.246094	0.246094	0.337936	0.362014	0.492188	0.543012	0.641727	0.780991	1.04409	1.25484	1.55643	2.11698	2.86992	3.85612
0.0868714	0.208646	0.246094	0.246094	0.338579	0.362387	0.492188	0.543788	0.645397	0.787788	1.04409	1.25484	1.55643	2.11698	2.86992	3.86108
0.0869336	0.208716	0.246094	0.246094	0.339051	0.362483	0.492188	0.54424	0.646511	0.790552	1.04409	1.25484	1.55643	2.11698	2.86992	3.87588
0.0869496	0.209002	0.246094	0.246094	0.339571	0.362572	0.492188	0.544712	0.649466	0.790556	1.04409	1.25484	1.55643	2.11698	2.8749	3.87741
0.0869913	0.209054	0.246094	0.246094	0.339872	0.362619	0.492188	0.548032	0.649473	0.793717	1.04409	1.25484	1.55643	2.11698	2.87907	3.88559
0.0869997	0.209385	0.246094	0.246094	0.339932	0.363089	0.492188	0.548525	0.651078	0.793899	1.04409	1.25484	1.55643	2.11738	2.88045	3.89108
0.0870112	0.209634	0.246094	0.246094	0.340083	0.364386	0.492188	0.548533	0.654388	0.800739	1.04439	1.25484	1.55643	2.12337	2.88045	3.89108
0.0871174	0.210012	0.246094	0.246094	0.340937	0.366845	0.492188	0.549795	0.6549	0.80105	1.04446	1.25484	1.55871	2.12771	2.88045	3.89108
0.0872653	0.210274	0.246094	0.246094	0.34159	0.367067	0.492188	0.550282	0.655818	0.801065	1.04531	1.25484	1.56262	2.1286	2.88045	3.89108
0.0872749	0.210427	0.246094	0.246094	0.342246	0.367242	0.492188	0.550282	0.656135	0.803714	1.04586	1.25605	1.56811	2.13206	2.88045	3.89108
0.0872985	0.210591	0.246094	0.246094	0.342433	0.368565	0.492188	0.550282	0.657452	0.807291	1.04693	1.25888	1.57104	2.13472	2.89698	3.89108
0.0874353	0.211011	0.246094	0.246094	0.342953	0.368778	0.492188	0.550282	0.659969	0.809084	1.04899	1.26003	1.57577	2.14006	2.89714	3.90519
0.0879566	0.211073	0.246094	0.246094	0.343639	0.370237	0.492188	0.550282	0.660245	0.809873	1.05107	1.26818	1.57577	2.14409	2.89754	3.91063
0.0881106	0.211198	0.246094	0.246094	0.343728	0.371317	0.492188	0.550282	0.661684	0.810724	1.05219	1.26975	1.57577	2.14588	2.89794	3.91428
0.088112	0.211316	0.246094	0.246094	0.34418	0.371461	0.492188	0.550282	0.66242	0.811524	1.05261	1.27074	1.57577	2.14843	2.89822	3.91434
0.088208	0.211533	0.246094	0.246094	0.344253	0.371572	0.492188	0.550282	0.664001	0.81958	1.05938	1.27644	1.57577	2.14927	2.89832	3.92077
0.0882716	0.212079	0.246094	0.246094	0.345298	0.372035	0.492188	0.550282	0.666574	0.819602	1.05973	1.2774	1.57577	2.15168	2.89853	3.93327
0.088272	0.212173	0.246094	0.246094	0.345992	0.372816	0.492188	0.550282	0.6719	0.820281	1.06066	1.27782	1.57577	2.15318	2.91116	3.9375
0.0883817	0.212338	0.246094	0.246094	0.346083	0.374211	0.492188	0.550282	0.67834	0.820582	1.06288	1.27796	1.57577	2.16578	2.91708	3.9375
0.0885844	0.213013	0.246094	0.246094	0.347494	0.374443	0.492188	0.550282	0.679354	0.820671	1.06598	1.27942	1.57577	2.16743	2.94796	3.94153
0.0885942	0.21351	0.246094	0.246094	0.348029	0.374541	0.492188	0.550282	0.679997	0.820845	1.067	1.28037	1.57577	2.16988	2.95267	3.94518
0.0887061	0.213557	0.246094	0.246094	0.348029	0.375704	0.492188	0.550282	0.68001	0.821844	1.06828	1.28388	1.57577	2.18804	2.95282	3.94518
0.0887252	0.213717	0.246094	0.246094	0.348029	0.376301	0.492188	0.550282	0.68024	0.826943	1.06855	1.28416	1.57577	2.19134	2.95312	3.94518
0.088984	0.213852	0.246094	0.246094	0.348029	0.376404	0.492188	0.550282	0.681289	0.828887	1.07151	1.28512	1.57577	2.19589	2.95312	3.94844
0.0890187	0.214082	0.246094	0.246094	0.348029	0.376728	0.492188	0.550282	0.682575	0.832997	1.07191	1.28549	1.58161	2.19848	2.95312	3.95797
0.0891556	0.214171	0.246094	0.246094	0.348029	0.376965	0.492188	0.550282	0.693432	0.833405	1.07372	1.28553	1.58301	2.20113	2.95312	3.96814
0.0891784	0.214607	0.246094	0.246094	0.348029	0.379389	0.492188	0.550282	0.694645	0.835136	1.07533	1.28572	1.58384	2.20113	2.95312	3.96814
0.0892086	0.214769	0.246094	0.246094	0.348029	0.37979	0.492188	0.550282	0.694826	0.835285	1.07549	1.28894	1.58492	2.20228	2.95359	3.96814
0.0893271	0.214831	0.246094	0.246094	0.348029	0.380813	0.492188	0.550282	0.695395	0.835493	1.07771	1.28953	1.60007	2.2037	2.95519	3.96814
0.0893392	0.214893	0.246094	0.246094	0.348029	0.381239	0.492188	0.550282	0.696058	0.839456	1.08146	1.29193	1.60244	2.20513	2.96336	3.96884
0.0893599	0.215064	0.246094	0.246094	0.348029	0.381249	0.492188	0.550282	0.696058	0.842979	1.08182	1.29583	1.6046	2.20564	2.96336	3.9734
0.0895529	0.215184	0.246094	0.246094	0.348029	0.382228	0.492188	0.550282	0.696058	0.845929	1.08212	1.29598	1.60535	2.20811	2.96336	3.97571
0.0896324	0.21543	0.246094	0.246094	0.348029	0.382975	0.492188	0.550282	0.696058	0.846077	1.08332	1.30038	1.61088	2.20922	2.96336	3.97577
0.089794	0.215795	0.246094	0.246094	0.348029	0.383035	0.492188	0.550282	0.696058	0.851433	1.08495	1.30191	1.61466	2.21484	2.96336	3.97577
0.0900223	0.216067	0.246094	0.246094	0.348029	0.383793	0.492188	0.550282	0.696058	0.852389	1.08795	1.30381	1.61992	2.21484	2.96336	3.97577
0.0903471	0.216562	0.246094	0.246094	0.348029	0.384655	0.492188	0.550282	0.696058	0.853528	1.09129	1.30502	1.62003	2.21484	2.96434	3.97577
0.0904846	0.216563	0.246094	0.246094	0.348029	0.385854	0.492188	0.550282	0.696058	0.854126	1.09224	1.30647	1.62271	2.21484	2.97356	3.97577
0.0907369	0.216643	0.246094	0.246094	0.348029	0.386077	0.492188	0.550282	0.696058	0.855779	1.09483	1.31092	1.62352	2.21484	2.97356	3.97577
0.0908491	0.216773	0.246094	0.246094	0.348029	0.386583	0.492188	0.550282	0.696058	0.856025	1.09728	1.31319	1.63178	2.21686	2.97356	3.97577
0.0908564	0.216836	0.246094	0.246094	0.348029	0.387628	0.492188	0.550282	0.696058	0.863936	1.09745	1.31368	1.63484	2.21961	2.97356	3.98437
0.0909706	0.216842	0.246094	0.246094	0.348029	0.387891	0.492188	0.550282	0.696058	0.868507	1.10056	1.31853	1.63485	2.22178	2.97356	3.98638
0.0913008	0.217	0.246094	0.246094	0.348029	0.388312	0.492188	0.550282	0.696058	0.869075	1.10056	1.31874	1.63954	2.22637	2.97356	3.99372
0.0913353	0.217041	0.246094	0.246094	0.348029	0.388831	0.492188	0.550282	0.696058	0.870887	1.10056	1.31912	1.64194	2.22765	2.97392	4.00612
0.0913784	0.217069	0.246094	0.246094	0.348029	0.389174	0.492188	0.550282	0.696058	0.874703	1.10056	1.31924	1.64303	2.22847	2.97889	4.01922
0.0915232	0.217088	0.246094	0.246094	0.348029	0.389827	0.492188	0.550282	0.696058	0.876882	1.10056	1.31935	1.64588	2.22847	2.97939	4.02458
0.0915259	0.217533	0.246094	0.246094	0.348029	0.390409	0.492188	0.550282	0.696058	0.877764	1.10056	1.32333	1.65085	2.22847	2.97962	4.03297
0.0915522	0.217656	0.246094	0.246094	0.348029	0.391241	0.492188	0.550282	0.696058	0.878226	1.10056	1.32526	1.65085	2.22847	2.98319	4.03624
0.0915949	0.218027	0.246094	0.246094	0.348029	0.391761	0.492188	0.550282	0.696058	0.882883	1.10056	1.32526	1.65085	2.23168	2.99211	4.03624
0.0918761	0.218106	0.246094	0.246094	0.348029	0.391927	0.492188	0.550282	0.696058	0.883406	1.10056	1.32526	1.65085	2.23804	2.99252	4.03624
0.0920145	0.218161	0.246094	0.246094	0.348029	0.392631	0.492188	0.550282	0.696058	0.884644	1.10056	1.32526	1.65085	2.23863	2.99275	4.03624
0.0921026	0.218366	0.246094	0.246094	0.348029	0.393553	0.492188	0.550282	0.696058	0.887304	1.10056	1.32526	1.65085	2.24118	2.99386	4.03624
0.0922078	0.218614	0.246094	0.246094	0.348029	0.394195	0.492188	0.550282	0.696058	0.887304	1.10056	1.32526	1.65085	2.24932	2.99386	4.03624
0.0922813	0.218983	0.246094	0.246094	0.348029	0.394809	0.492188	0.550282	0.696058	0.887304	1.10056	1.32526	1.65085	2.2502	2.99386	4.03624
0.0924475	0.219191	0.246094	0.246094	0.348029	0.396676	0.492188	0.550282	0.696058	0.887304	1.10056	1.32526	1.65085	2.25458	2.99386	4.03624
0.0929199	0.219648	0.246094	0.246094	0.348029	0.396824	0.492188	0.550282	0.696058	0.887304	1.10056	1.32526	1.65085	2.25566	2.99386	4.03624
0.0929444	0.219725	0.246094	0.246094	0.348029	0.396916	0.492188	0.550282	0.696058	0.887304	1.10056	1.32526	1.65085	2.25572	2.99386	4.04149
0.0929977	0.219914	0.246094	0.246094	0.348029	0.397843	0.492188	0.550282	0.696058	0.887304	1.10084	1.32526	1.65418	2.25874	2.9939	4.04966
0.0930509	0.219996	0.246094	0.246094	0.348029	0.398585	0.492188	0.550282	0.696058	0.887304	1.10173	1.32526	1.65883	2.26887	3.00031	4.05868
0.0931097	0.220015	0.246094	0.246094	0.348029	0.399676	0.492188	0.550282	0.696058	0.887304	1.10785	1.32526	1.66965	2.26887	3.00242	4.05868
0.0931429	0.220172	0.246094	0.246094	0.348029	0.400623	0.492188	0.550282	0.696058	0.887304	1.10949	1.32526	1.67076	2.26887	3.00396	4.06323
0.0932186	0.220249	0.246094	0.246094	0.348029	0.400725	0.492188	0.550282	0.696565	0.887304	1.11424	1.32526	1.67114	2.26887	3.00396	4.06678
0.0932634	0.22063	0.246094	0.246094	0.348029	0.401349	0.492188	0.550282	0.698472	0.887304	1.11459	1.32526	1.675	2.26887	3.00396	4.07358
0.0932929	0.220958	0.246094	0.246094	0.348029	0.402162	0.492188	0.550282	0.700935	0.887304	1.11628	1.32526	1.6763	2.26887	3.00396	4.07358
0.0932968	0.221261	0.246094	0.246094	0.348029	0.403312	0.492188	0.550282	0.701964	0.887304	1.11895	1.32526	1.68731	2.26887	3.00396	4.07358
0.093424	0.221431	0.246094	0.246094	0.348029	0.403472	0.492188	0.550282	0.705207	0.887304	1.11977	1.32526	1.68988	2.26887	3.00396	4.07358
0.0935656	0.221597	0.246094	0.246094	0.348029	0.403911	0.492188	0.550282	0.707014	0.887304	1.1229	1.32526	1.69396	2.26887	3.00407	4.07709
0.0946921	0.221959	0.246094	0.24635	0.348029	0.404005	0.492188	0.550282	0.707995	0.887304	1.12407	1.32526	1.69498	2.26887	3.00442	4.08794
0.0947017	0.222089	0.246094	0.247031	0.348029	0.404555	0.492188	0.550282	0.71	0.887304	1.12609	1.32526	1.69612	2.27168	3.0081	4.09461
0.0947234	0.22231	0.246094	0.24717	0.348029	0.40523	0.492188	0.550282	0.712187	0.887304	1.12667	1.32526	1.69881	2.27827	3.01935	4.10786
0.0949894	0.222367	0.246094	0.247774	0.348029	0.406836	0.492188	0.550282	0.712332	0.887304	1.13071	1.32526	1.70134	2.28167	3.01958	4.12528
0.0950503	0.222472	0.246094	0.247967	0.348029	0.407022	0.492188	0.550282	0.712824	0.887304	1.13313	1.32526	1.70389	2.28663	3.02165	4.12528
0.0951019	0.222518	0.246094	0.248227	0.348029	0.407913	0.492188	0.550282	0.713902	0.887304	1.13353	1.32526	1.70806	2.28994	3.02289	4.12528
0.0952572	0.22258	0.246094	0.24944	0.348029	0.407918	0.492188	0.550282	0.71823	0.887304	1.13362	1.32526	1.70986	2.29561	3.02538	4.12528
0.0953073	0.223007	0.246094	0.249884	0.348029	0.409034	0.492188	0.550282	0.718274	0.887304	1.13387	1.32808	1.71283	2.30107	3.02955	4.14476
0.0953248	0.223777	0.246094	0.25006	0.348029	0.409185	0.492188	0.550282	0.719983	0.887304	1.13415	1.33097	1.71705	2.30713	3.03625	4.15809
0.09535	0.22385	0.246094	0.250245	0.348029	0.409674	0.492188	0.550282	0.720878	0.887304	1.13671	1.33153	1.71897	2.31221	3.04036	4.16375
0.0953918	0.223896	0.246094	0.250447	0.348029	0.410303	0.492188	0.550282	0.7213	0.897831	1.1392	1.33399	1.72059	2.32164	3.04401	4.16499
0.0954712	0.224139	0.246094	0.250648	0.348029	0.410899	0.492188	0.550282	0.730088	0.900047	1.14015	1.33777	1.72105	2.32164	3.0481	4.17574
0.0955651	0.224224	0.246094	0.250774	0.348029	0.4122	0.492188	0.550282	0.730851	0.900307	1.14566	1.34378	1.72266	2.32164	3.05062	4.18359
0.0958233	0.224688	0.246094	0.25103	0.348029	0.412265	0.492188	0.550282	0.7319	0.901815	1.14634	1.3453	1.72266	2.32164	3.05901	4.18359
0.0958917	0.225784	0.246094	0.251217	0.348029	0.412348	0.492188	0.550282	0.732389	0.903001	1.15195	1.35203	1.72266	2.32164	3.06216	4.18359
0.0965223	0.226627	0.246094	0.251336	0.348029	0.412897	0.492188	0.550282	0.732993	0.903226	1.15332	1.35305	1.72266	2.32164	3.08355	4.18359
0.0966846	0.22666	0.246094	0.251343	0.348029	0.41352	0.492188	0.550282	0.735597	0.906878	1.1551	1.35374	1.72266	2.32164	3.08355	4.18359
0.0967481	0.226727	0.246094	0.252331	0.348029	0.414903	0.492188	0.550282	0.735614	0.907763	1.15689	1.35401	1.72266	2.32164	3.08355	4.18884
0.096953	0.22756	0.246094	0.253178	0.348029	0.416036	0.492188	0.550282	0.736812	0.909889	1.15876	1.35413	1.72266	2.32164	3.08355	4.18924
0.0969741	0.227749	0.246094	0.253513	0.348029	0.416786	0.492188	0.550282	0.737775	0.90997	1.15898	1.35418	1.72266	2.32164	3.08715	4.19289
0.0969979	0.227832	0.246094	0.25355	0.348029	0.417552	0.492188	0.550282	0.738281	0.910497	1.16094	1.35557	1.72266	2.32211	3.089	4.20525
0.0970609	0.228024	0.246094	0.254095	0.348029	0.41831	0.492188	0.550282	0.738281	0.911154	1.16189	1.36159	1.72266	2.32349	3.08909	4.20525
0.0973195	0.228272	0.246094	0.254198	0.348029	0.418392	0.492188	0.550282	0.738281	0.911935	1.16245	1.36234	1.74015	2.3241	3.08909	4.22788
0.0975377	0.228408	0.246094	0.25458	0.348029	0.418396	0.492188	0.550282	0.738281	0.911955	1.17084	1.36365	1.74015	2.32895	3.09358	4.23396
0.0976377	0.228618	0.246094	0.254762	0.348029	0.419174	0.492188	0.550282	0.738281	0.914587	1.17114	1.36463	1.74015	2.33465	3.09785	4.23396
0.0977882	0.228752	0.246094	0.25507	0.348029	0.419302	0.492188	0.550282	0.738281	0.915919	1.17121	1.36802	1.74015	2.33465	3.09989	4.23396
0.0978298	0.228982	0.246094	0.255985	0.348029	0.420725	0.492188	0.550282	0.738281	0.920508	1.17167	1.37111	1.74015	2.33465	3.11287	4.23396
0.0978729	0.229156	0.246094	0.25622	0.348029	0.421299	0.492188	0.550282	0.738281	0.92191	1.17262	1.37154	1.74015	2.33465	3.11287	4.23396
0.0980457	0.229803	0.246094	0.256987	0.348029	0.421966	0.492188	0.550282	0.738281	0.92258	1.17814	1.37185	1.74015	2.33465	3.11287	4.23396
0.0981248	0.229849	0.246094	0.257985	0.348029	0.422047	0.492188	0.550282	0.738281	0.923082	1.17921	1.37542	1.74015	2.33465	3.1149	4.23396
0.0982088	0.229912	0.246094	0.258036	0.348029	0.422292	0.492188	0.550282	0.738281	0.925206	1.18682	1.37767	1.74015	2.33465	3.11556	4.23396
0.0982161	0.230099	0.246094	0.25806	0.348029	0.422671	0.492188	0.550282	0.738281	0.925626	1.18686	1.3807	1.74015	2.33686	3.12656	4.23396
0.0982406	0.230398	0.246094	0.258231	0.348029	0.423294	0.492188	0.550282	0.738281	0.926074	1.1888	1.38099	1.74015	2.33785	3.12817	4.23396
0.0983459	0.230536	0.246094	0.258451	0.348029	0.42372	0.492188	0.550282	0.738281	0.926789	1.19	1.38118	1.74015	2.33798	3.12873	4.23396
0.0983794	0.230972	0.246094	0.258771	0.348029	0.423841	0.492188	0.550282	0.738281	0.929144	1.19043	1.38584	1.74015	2.3385	3.1316	4.23396
0.0983933	0.231179	0.246094	0.258789	0.348029	0.426164	0.492188	0.550282	0.738281	0.937469	1.19175	1.38639	1.74015	2.3388	3.13226	4.2463
0.0985609	0.231289	0.246094	0.258836	0.348029	0.426192	0.492188	0.550282	0.738281	0.943478	1.19301	1.38943	1.74015	2.33949	3.13226	4.29784
0.0985621	0.231456	0.246094	0.258935	0.348029	0.426369	0.492188	0.550282	0.738281	0.948084	1.19356	1.39212	1.74015	2.34201	3.13424	4.29784
0.0986554	0.231639	0.246094	0.259833	0.348029	0.427449	0.492188	0.550282	0.738281	0.952753	1.19429	1.39212	1.74015	2.34223	3.14184	4.29784
0.0987886	0.231669	0.246094	0.260389	0.348029	0.427575	0.492188	0.550282	0.738281	0.955291	1.19574	1.39212	1.74015	2.34978	3.14244	4.29784
0.0988229	0.231709	0.246094	0.260936	0.348029	0.427848	0.492188	0.550282	0.738281	0.958076	1.19767	1.39212	1.74015	2.35109	3.14402	4.30488
0.0988694	0.231795	0.246094	0.261003	0.348029	0.428758	0.492188	0.550282	0.738281	0.958147	1.20018	1.39212	1.74015	2.35137	3.14994	4.30488
0.099062	0.231939	0.246094	0.261361	0.348029	0.42929	0.492188	0.550282	0.738281	0.960259	1.20189	1.39212	1.74015	2.35311	3.15154	4.30488
0.099182	0.232202	0.246094	0.261585	0.348029	0.431464	0.492188	0.550282	0.738281	0.963891	1.2023	1.39212	1.74521	2.35358	3.15154	4.30488
0.0992006	0.232572	0.246094	0.262133	0.348029	0.432121	0.492188	0.550282	0.738281	0.964185	1.20349	1.39212	1.74566	2.35964	3.15154	4.30647
0.0993495	0.232866	0.246094	0.262237	0.348029	0.432464	0.492188	0.550282	0.738281	0.964884	1.20572	1.39212	1.7481	2.36239	3.15154	4.3575
0.0993677	0.233464	0.246094	0.263079	0.348029	0.433214	0.492188	0.550282	0.738281	0.965665	1.20725	1.39212	1.75133	2.3676	3.15449	4.36079
0.0994783	0.234252	0.246094	0.265079	0.348029	0.433463	0.492188	0.550282	0.738281	0.966379	1.20986	1.39212	1.75587	2.36877	3.1545	4.37682
0.0997917	0.234387	0.246094	0.265193	0.348029	0.433895	0.492188	0.552935	0.738281	0.96639	1.21171	1.39212	1.75894	2.36887	3.16256	4.38157
0.0999005	0.234484	0.246094	0.265781	0.348029	0.434364	0.492188	0.558092	0.738281	0.966968	1.21292	1.39212	1.77461	2.37233	3.16416	4.38157
0.100004	0.234622	0.246094	0.266388	0.348029	0.43553	0.492188	0.558562	0.738281	0.969944	1.21591	1.39212	1.77461	2.37495	3.16474	4.38157
0.100245	0.234729	0.246094	0.266442	0.348029	0.43585	0.492188	0.562765	0.738281	0.970142	1.21798	1.39245	1.77461	2.37625	3.16819	4.40226
0.10053	0.234806	0.246094	0.266731	0.348029	0.436925	0.494223	0.567091	0.738281	0.972526	1.21813	1.39491	1.77461	2.38006	3.17263	4.40226
0.100561	0.234812	0.246094	0.267042	0.348029	0.437428	0.495039	0.56825	0.738281	0.976292	1.21937	1.39707	1.77461	2.38071	3.17471	4.40226
0.100646	0.23493	0.246094	0.267378	0.348029	0.437657	0.495551	0.568557	0.738281	0.977867	1.22115	1.39715	1.77461	2.38296	3.17609	4.43652
0.100783	0.2351	0.246094	0.267846	0.348029	0.437751	0.496406	0.571779	0.738281	0.977947	1.22156	1.39765	1.77461	2.38537	3.17848	4.43652
0.100884	0.235178	0.246094	0.269575	0.348029	0.437808	0.496436	0.574329	0.738281	0.978725	1.22344	1.40682	1.77461	2.38845	3.17936	4.43652
0.101112	0.235261	0.246094	0.2702	0.348029	0.439382	0.496857	0.575107	0.738281	0.981401	1.22413	1.40809	1.77467	2.38996	3.1858	4.43652
0.101198	0.23544	0.246094	0.270445	0.348029	0.439686	0.497375	0.577835	0.738281	0.981564	1.22519	1.40904	1.77763	2.39208	3.18799	4.43652
0.101583	0.235518	0.246094	0.270829	0.348029	0.439767	0.497455	0.578263	0.738281	0.98214	1.22689	1.41114	1.77779	2.39338	3.18866	4.43652
0.101725	0.235673	0.246094	0.270946	0.348029	0.440409	0.497471	0.579566	0.738281	0.982575	1.22735	1.41182	1.77806	2.39671	3.19603	4.43652
0.101777	0.235682	0.246094	0.271691	0.348029	0.440891	0.497986	0.580049	0.738281	0.982947	1.22904	1.41288	1.77847	2.39709	3.19696	4.43652
0.101904	0.235908	0.246094	0.271929	0.348029	0.441233	0.499476	0.58025	0.738281	0.983218	1.23047	1.41373	1.77899	2.39726	3.19696	4.43652
0.101953	0.23591	0.246094	0.271951	0.348029	0.441404	0.499944	0.580931	0.738281	0.984375	1.23047	1.41407	1.783	2.39876	3.19922	4.43652
0.102246	0.236057	0.246094	0.273408	0.348029	0.44208	0.500266	0.581242	0.738281	0.984375	1.23047	1.41409	1.78739	2.40086	3.19922	4.43652
0.102299	0.23607	0.246094	0.273465	0.348029	0.445383	0.501045	0.581466	0.738281	0.984375	1.23047	1.41901	1.78817	2.41366	3.19922	4.44061
0.102482	0.236129	0.246094	0.273763	0.348029	0.446042	0.501882	0.583548	0.738281	0.984375	1.23047	1.42311	1.79094	2.41631	3.19922	4.46989
0.102593	0.236166	0.246094	0.273799	0.348029	0.446541	0.503353	0.584471	0.738281	0.984375	1.23047	1.42387	1.79159	2.41945	3.19922	4.48604
0.102701	0.236598	0.246094	0.274075	0.348029	0.446915	0.504844	0.586469	0.738281	0.984375	1.23047	1.4239	1.79159	2.42374	3.19922	4.50501
0.102726	0.236748	0.246094	0.274757	0.348029	0.447114	0.509003	0.58671	0.738281	0.984375	1.23047	1.42625	1.79159	2.42374	3.19922	4.51768
0.10277	0.236783	0.246094	0.275482	0.348029	0.449451	0.510302	0.589811	0.738281	0.984375	1.23047	1.43074	1.79159	2.42374	3.19922	4.51768
0.102924	0.236853	0.246094	0.275567	0.348029	0.449966	0.511813	0.590708	0.738281	0.984375	1.23047	1.43078	1.79159	2.42374	3.19922	4.53407
0.103016	0.236925	0.246094	0.275578	0.348029	0.450092	0.512187	0.590799	0.738281	0.984375	1.23047	1.43191	1.79159	2.42374	3.19922	4.57761
0.10306	0.23707	0.246094	0.275806	0.348029	0.450256	0.512742	0.591497	0.738281	0.984375	1.23047	1.43496	1.79159	2.42374	3.20145	4.57761
0.103077	0.237502	0.246094	0.276328	0.348029	0.451563	0.51337	0.592713	0.738281	0.984375	1.23047	1.43496	1.79159	2.42374	3.20867	4.57761
0.103087	0.237531	0.246094	0.276388	0.348029	0.451872	0.514891	0.594136	0.738281	0.984375	1.23047	1.43496	1.79334	2.42416	3.20867	4.59741
0.103208	0.237591	0.246094	0.2777	0.348029	0.452625	0.516168	0.594215	0.738281	0.984375	1.23047	1.43496	1.79568	2.4362	3.20867	4.59741
0.103261	0.237632	0.246094	0.277927	0.348029	0.453395	0.516285	0.59627	0.738281	0.984375	1.23047	1.43496	1.79592	2.4362	3.20867	4.59741
0.103456	0.237668	0.246094	0.278147	0.348029	0.45412	0.517088	0.596689	0.738281	0.984375	1.23047	1.43496	1.7997	2.4381	3.20867	4.59741
0.103581	0.2377	0.246094	0.279356	0.348029	0.454729	0.517203	0.603138	0.738281	0.984375	1.23047	1.43496	1.80025	2.44103	3.21391	4.59741
0.103691	0.237972	0.246094	0.27983	0.348029	0.455363	0.518971	0.604696	0.738281	0.984375	1.23047	1.43496	1.80328	2.44466	3.2226	4.62368
0.103716	0.238539	0.246094	0.280353	0.348029	0.45592	0.522792	0.605703	0.738281	0.984375	1.23047	1.43496	1.80647	2.45405	3.22913	4.62368
0.103787	0.238884	0.246094	0.280699	0.348029	0.45636	0.523472	0.606791	0.738281	0.984375	1.23047	1.43496	1.8081	2.45455	3.23686	4.64329
0.103817	0.238947	0.246094	0.280721	0.348029	0.456435	0.524313	0.608562	0.738281	0.984375	1.23047	1.43496	1.81007	2.45667	3.23686	4.6693
0.103926	0.239242	0.246094	0.280926	0.348029	0.458718	0.525525	0.608617	0.738281	0.984375	1.23047	1.43496	1.81076	2.46094	3.23686	4.6693
0.104153	0.240068	0.246094	0.281905	0.348029	0.458862	0.526077	0.608879	0.738281	0.984375	1.23047	1.43496	1.81654	2.46094	3.2451	4.6693
0.1042	0.240463	0.246094	0.282562	0.348029	0.459123	0.527071	0.609738	0.738281	0.984375	1.23047	1.43496	1.81813	2.46094	3.24685	4.72731
0.104235	0.240529	0.246094	0.28281	0.348029	0.461364	0.529183	0.609952	0.738281	0.984375	1.23047	1.43496	1.81875	2.46094	3.2506	4.73371
0.104433	0.240622	0.246094	0.283285	0.348029	0.462281	0.52927	0.61145	0.738281	0.984375	1.23047	1.43496	1.83179	2.46094	3.25564	4.73371
0.104467	0.24063	0.246094	0.284011	0.348029	0.4624	0.53032	0.614096	0.738281	0.984375	1.23047	1.43496	1.83304	2.46094	3.26587	4.73371
0.104534	0.24076	0.246094	0.284166	0.348029	0.462881	0.530651	0.614735	0.738281	0.984375	1.23047	1.43496	1.83524	2.46094	3.26857	4.74348
0.104541	0.240838	0.246094	0.284207	0.348029	0.465715	0.532426	0.616135	0.738281	0.984375	1.23047	1.43496	1.83702	2.46094	3.27249	4.75286
0.104557	0.241528	0.246094	0.284464	0.348029	0.465768	0.534444	0.616505	0.738281	0.984375	1.23047	1.43496	1.83945	2.46099	3.2833	4.75286
0.104632	0.241557	0.246094	0.284476	0.348029	0.466423	0.535483	0.617122	0.738879	0.984375	1.23047	1.43496	1.84133	2.46173	3.2833	4.77828
0.104755	0.241587	0.246094	0.284498	0.348029	0.468468	0.536122	0.622391	0.739707	0.984375	1.23047	1.43496	1.8424	2.4625	3.2833	4.77828
0.104823	0.241799	0.246094	0.284586	0.348029	0.468494	0.536625	0.622727	0.740169	0.984375	1.23047	1.43496	1.84424	2.46418	3.2833	4.82011
0.104945	0.242023	0.246094	0.284884	0.348029	0.47009	0.538363	0.623529	0.741453	0.984375	1.23047	1.43496	1.85014	2.47233	3.28543	4.82361
0.104989	0.24203	0.246094	0.285131	0.348029	0.470648	0.539345	0.624527	0.741533	0.986207	1.23047	1.43496	1.85241	2.47321	3.28548	4.83498
0.105038	0.242675	0.246094	0.285207	0.348029	0.470801	0.541425	0.62512	0.741881	0.990354	1.23047	1.43496	1.85344	2.47321	3.29417	4.83498
0.105073	0.24333	0.246094	0.287166	0.348029	0.471652	0.54178	0.626191	0.743775	0.991548	1.23047	1.43559	1.86049	2.47321	3.29608	4.84748
0.105249	0.243387	0.246094	0.287362	0.348029	0.473107	0.54324	0.627283	0.745558	0.991787	1.23047	1.43711	1.86543	2.47321	3.3006	4.85373
0.105281	0.243772	0.246094	0.28745	0.348029	0.473731	0.544135	0.627462	0.746014	0.993317	1.23047	1.43892	1.866	2.47321	3.30169	4.85373
0.105535	0.244153	0.246094	0.287487	0.348029	0.473873	0.546568	0.627624	0.748127	0.995632	1.23047	1.44078	1.8661	2.47321	3.30169	4.86645
0.105897	0.244199	0.246094	0.287526	0.348029	0.475094	0.547122	0.630209	0.74883	0.99711	1.23047	1.44479	1.87035	2.47568	3.30169	4.90338
0.106162	0.244228	0.246094	0.287896	0.348029	0.47659	0.547743	0.63144	0.749292	0.997402	1.23047	1.44733	1.87419	2.47596	3.30169	4.90338
0.106207	0.244245	0.246094	0.288458	0.348029	0.477587	0.550238	0.632045	0.750874	1.00146	1.23047	1.44915	1.87419	2.47762	3.30169	4.90338
0.106514	0.244313	0.246094	0.288857	0.348029	0.478069	0.550282	0.635248	0.7539	1.00869	1.23047	1.45028	1.87419	2.47926	3.30354	4.90338
0.106547	0.244427	0.246094	0.28897	0.348029	0.480366	0.550282	0.635907	0.756691	1.01161	1.23047	1.45078	1.87895	2.48463	3.30923	4.92188
0.106728	0.244496	0.246094	0.288991	0.348029	0.480902	0.550282	0.639332	0.761752	1.01181	1.23047	1.45105	1.88164	2.48588	3.30957	4.95254
0.106795	0.244992	0.246094	0.289445	0.348029	0.481289	0.550282	0.639506	0.766373	1.01467	1.23047	1.45122	1.88186	2.48733	3.31085	4.96234
0.107233	0.245033	0.246094	0.290457	0.348029	0.481637	0.550282	0.641926	0.76999	1.01467	1.23047	1.45281	1.88187	2.48841	3.31085	4.973
0.107283	0.245089	0.246094	0.29105	0.348029	0.48189	0.550282	0.64503	0.770705	1.01467	1.23047	1.45294	1.88374	2.4906	3.31085	4.98302
0.107336	0.245255	0.246094	0.291579	0.348029	0.482977	0.550282	0.647317	0.772152	1.01467	1.23047	1.45715	1.88405	2.49281	3.31085	5.03299
0.107337	0.245932	0.246094	0.292087	0.348029	0.483162	0.550282	0.647553	0.776464	1.01467	1.23047	1.45749	1.88657	2.49569	3.31085	5.07335
0.107559	0.246094	0.246094	0.292216	0.348029	0.483232	0.550282	0.650389	0.776583	1.01467	1.23047	1.45759	1.88937	2.49877	3.31085	5.07335
0.107598	0.246094	0.246094	0.292654	0.348029	0.484401	0.550282	0.660639	0.77745	1.01467	1.23047	1.45915	1.8961	2.50139	3.31085	5.09758
0.107604	0.246094	0.246094	0.292656	0.348029	0.485618	0.550282	0.662794	0.778217	1.01467	1.23047	1.46159	1.90051	2.50428	3.31085	5.12088
0.107669	0.246094	0.246094	0.293133	0.348029	0.485658	0.550282	0.664931	0.778217	1.01467	1.23047	1.46795	1.90472	2.50435	3.31085	5.13859
0.107675	0.246094	0.246094	0.294338	0.348029	0.485801	0.550282	0.666614	0.778217	1.01467	1.23047	1.46991	1.90566	2.50496	3.31085	5.18339
0.107886	0.246094	0.246094	0.294577	0.348029	0.485983	0.550282	0.667141	0.778217	1.01467	1.23047	1.47019	1.91162	2.50967	3.31085	5.21463
0.107977	0.246094	0.246094	0.295284	0.348029	0.487843	0.550282	0.670126	0.778217	1.01467	1.23047	1.47229	1.91215	2.50967	3.31085	5.26664
0.108207	0.246094	0.246094	0.295625	0.348029	0.488506	0.550282	0.670751	0.778217	1.01467	1.23047	1.47347	1.91426	2.50967	3.31085	5.28386
0.108234	0.246094	0.246094	0.295728	0.348029	0.491581	0.550282	0.670841	0.778217	1.01467	1.23047	1.47443	1.9152	2.50967	3.31085	5.30102
0.108486	0.246094	0.246094	0.2961	0.348029	0.491863	0.550282	0.671829	0.778217	1.01467	1.23047	1.47527	1.91925	2.50967	3.31097	5.342
0.108627	0.246094	0.246094	0.296392	0.348029	0.492188	0.550282	0.673005	0.778217	1.01467	1.23092	1.47656	1.92205	2.5149	3.31184	5.44966
0.108637	0.246094	0.246094	0.297466	0.348029	0.492188	0.550282	0.674733	0.778217	1.01467	1.23488	1.47656	1.92205	2.51783	3.31501	5.46417
0.108828	0.246094	0.246094	0.297927	0.348029	0.492188	0.550282	0.675074	0.778217	1.01467	1.23501	1.47656	1.92205	2.52349	3.31833	5.47965
0.108846	0.246094	0.246094	0.298435	0.348029	0.492188	0.550282	0.676486	0.778217	1.01467	1.23612	1.47656	1.92205	2.52468	3.33085	5.50917
0.109073	0.246094	0.246094	0.29864	0.348029	0.492188	0.550282	0.679737	0.778217	1.01467	1.23738	1.47656	1.92205	2.52905	3.33843	5.62691
0.109133	0.246094	0.246094	0.29937	0.348029	0.492188	0.550282	0.680202	0.778217	1.01467	1.2378	1.47656	1.92205	2.52921	3.34039	5.6423
0.109185	0.246094	0.246094	0.300096	0.348094	0.492188	0.550282	0.680209	0.778217	1.01467	1.23798	1.47656	1.92205	2.52987	3.34554	5.75577
0.10923	0.246094	0.246094	0.300721	0.348648	0.492188	0.550282	0.681467	0.778217	1.01467	1.23982	1.47656	1.92205	2.53046	3.34724	5.80802
0.109243	0.246094	0.246094	0.300867	0.349375	0.492188	0.550282	0.68364	0.778217	1.01467	1.24228	1.47656	1.92205	2.53369	3.34724	5.85354
0.109563	0.246094	0.246094	0.301033	0.349423	0.492188	0.550282	0.68677	0.778217	1.01467	1.24341	1.47656	1.92205	2.53369	3.34724	5.86803
0.109616	0.246094	0.246094	0.301186	0.350097	0.492188	0.550282	0.688888	0.778217	1.01467	1.24508	1.47656	1.92205	2.53369	3.34724	5.9573
0.109657	0.246094	0.246094	0.301411	0.35028	0.492188	0.550282	0.689668	0.778217	1.01467	1.24685	1.47656	1.92205	2.53369	3.34724	5.95802
0.109676	0.246094	0.246094	0.303667	0.350728	0.492188	0.550282	0.691238	0.778217	1.01467	1.24688	1.47656	1.92205	2.53369	3.34724	5.99147
0.110008	0.246094	0.246094	0.304037	0.351223	0.492188	0.550282	0.691659	0.778217	1.01467	1.24745	1.47656	1.92205	2.53369	3.34935	6.00791
0.110151	0.246094	0.246094	0.304574	0.351417	0.492188	0.550282	0.692163	0.778217	1.01467	1.24774	1.47656	1.92205	2.53369	3.35096	6.02624
0.110258	0.246094	0.246094	0.304897	0.351661	0.492188	0.550282	0.692375	0.778217	1.01467	1.25065	1.47656	1.92205	2.53393	3.36266	6.15234
0.110269	0.246094	0.246094	0.306738	0.352027	0.492188	0.550282	0.694336	0.778217	1.01467	1.25127	1.47679	1.92205	2.5342	3.37424	6.15234
0.110287	0.246094	0.246094	0.306827	0.352124	0.492188	0.550282	0.694727	0.778217	1.01467	1.25304	1.47689	1.92205	2.53784	3.377	6.21113
0.110303	0.246094	0.246094	0.306892	0.352239	0.492188	0.550282	0.696058	0.778217	1.01467	1.25378	1.47771	1.92205	2.54091	3.38017	6.36282
0.110412	0.246094	0.246094	0.307328	0.352387	0.492188	0.550282	0.696058	0.778217	1.01467	1.25484	1.47829	1.92205	2.55246	3.3828	6.38735
0.110501	0.246094	0.246094	0.308042	0.352641	0.492188	0.550282	0.696058	0.778217	1.01467	1.25484	1.47853	1.92357	2.55644	3.38343	6.55195
0.110522	0.246094	0.246094	0.308283	0.353011	0.492188	0.550282	0.696058	0.778217	1.01467	1.25484	1.48073	1.92397	2.55851	3.38471	6.55844
0.110524	0.246094	0.246094	0.310856	0.353412	0.492188	0.550282	0.696058	0.778217	1.01467	1.25484	1.48285	1.92803	2.56361	3.40556	6.59258
0.110608	0.246094	0.246094	0.311058	0.354288	0.492188	0.550282	0.696058	0.778217	1.01467	1.25484	1.48694	1.92848	2.56465	3.40578	6.69447
0.110641	0.246094	0.246094	0.312399	0.354868	0.492188	0.550282	0.696058	0.778217	1.01467	1.25484	1.48778	1.92901	2.56611	3.40746	6.86013
0.110758	0.246094	0.246094	0.312498	0.355539	0.492188	0.550282	0.696058	0.778217	1.01467	1.25484	1.48863	1.92909	2.56929	3.4098	6.87206
0.110907	0.246094	0.246094	0.312814	0.355781	0.492188	0.550282	0.696058	0.778217	1.01467	1.25484	1.48887	1.92924	2.56929	3.41884	6.98914
0.110908	0.246094	0.246094	0.313108	0.356023	0.492188	0.550282	0.696058	0.778217	1.01467	1.25484	1.48897	1.92951	2.56929	3.41884	6.99772
0.110942	0.246094	0.246094	0.313798	0.356454	0.492188	0.550282	0.696058	0.778217	1.01467	1.25484	1.49054	1.93049	2.56929	3.41884	7.23783
0.111087	0.246094	0.246094	0.315869	0.357118	0.492188	0.550282	0.696058	0.778217	1.01467	1.25484	1.49297	1.93176	2.56929	3.42153	7.4725
0.1111	0.246094	0.246094	0.316003	0.357318	0.492188	0.550282	0.696058	0.778217	1.01467	1.25484	1.49341	1.93297	2.56929	3.42185	7.70788
0.111258	0.246094	0.246094	0.317613	0.357414	0.492188	0.550282	0.696058	0.778217	1.01467	1.25484	1.49472	1.93419	2.56929	3.42334	7.94391
0.111281	0.246094	0.246094	0.318164	0.358447	0.492188	0.550282	0.696058	0.778217	1.01569	1.25484	1.49508	1.93842	2.56929	3.42694	7.94391
0.11131	0.246094	0.246094	0.31818	0.359362	0.492188	0.550282	0.696058	0.778217	1.01586	1.25484	1.49693	1.939	2.56929	3.42726	7.94391
0.111521	0.246094	0.246094	0.318729	0.359818	0.492188	0.550282	0.696058	0.778217	1.01812	1.25484	1.49693	1.9408	2.5725	3.42769	8.01601
0.111621	0.246094	0.246094	0.319072	0.359939	0.492188	0.550282	0.696058	0.778217	1.02113	1.25484	1.49693	1.94332	2.5727	3.42769	8.09495
0.111643	0.246094	0.246094	0.319072	0.360153	0.492188	0.550282	0.696058	0.778217	1.02532	1.25484	1.49693	1.9444	2.57464	3.42769	8.14715
0.111871	0.246094	0.246094	0.319494	0.360662	0.492188	0.550282	0.696058	0.778217	1.028	1.25484	1.49693	1.94489	2.57739	3.42769	8.25424
0.111997	0.246094	0.246094	0.320137	0.360785	0.492188	0.550282	0.696058	0.778217	1.02899	1.25484	1.49693	1.94522	2.57902	3.42769	8.25424
0.112129	0.246094	0.246094	0.320277	0.361081	0.492188	0.550282	0.696058	0.778217	1.02965	1.25484	1.49693	1.94788	2.58283	3.42769	8.25424
0.112364	0.246094	0.246094	0.320801	0.362017	0.492188	0.550282	0.696058	0.778217	1.03105	1.25484	1.49693	1.94957	2.5839	3.42769	9.0253
0.112979	0.246094	0.246094	0.321029	0.362307	0.492188	0.550282	0.696058	0.778217	1.03305	1.25484	1.49693	1.95003	2.58393	3.43017	10.3476
0.113022	0.246094	0.246094	0.321443	0.36374	0.492188	0.550282	0.696058	0.778217	1.03318	1.25484	1.49693	1.95062	2.58482	3.43467	11.5559
0.113377	0.246094	0.246094	0.321906	0.364645	0.492188	0.550282	0.696058	0.778217	1.03431	1.25484	1.49693	1.95197	2.59082	3.43652	11.569
0.113404	0.246094	0.246094	0.322073	0.365297	0.492188	0.550282	0.696058	0.778217	1.03589	1.25484	1.49693	1.95308	2.59151	3.44531	11.569
0.113546	0.246094	0.246094	0.322609	0.36531	0.492188	0.550282	0.696058	0.778217	1.03725	1.25484	1.49693	1.95524	2.60084	3.44531	11.6082
0.113705	0.246094	0.246094	0.323264	0.365559	0.492188	0.550282	0.696058	0.778217	1.0378	1.25484	1.49693	1.95559	2.61439	3.45331	11.7405
0.113753	0.246094	0.246094	0.323388	0.365938	0.492188	0.550282	0.696058	0.778217	1.03893	1.25484	1.49693	1.96148	2.6157	3.45335	11.8942
0.113828	0.246094	0.246094	0.323613	0.365939	0.492188	0.550282	0.696058	0.778217	1.03956	1.25484	1.50141	1.96875	2.61601	3.45409	12.0209
0.114105	0.246094	0.246094	0.323707	0.366932	0.492188	0.550282	0.696058	0.778217	1.03957	1.25484	1.50494	1.96875	2.61601	3.45409	12.1187
0.114122	0.246094	0.246094	0.323956	0.367564	0.492188	0.550282	0.696058	0.778217	1.0399	1.25484	1.5099	1.96875	2.61601	3.45409	12.248
0.114142	0.246094	0.246094	0.324042	0.368009	0.492188	0.550282	0.696058	0.778217	1.04238	1.25484	1.51422	1.96875	2.61601	3.46251	12.248
0.114172	0.246094	0.246094	0.324263	0.368239	0.492188	0.550282	0.696788	0.77853	1.04344	1.25484	1.51468	1.96875	2.61601	3.46396	12.344
0.114435	0.246094	0.246094	0.324503	0.368285	0.492188	0.550282	0.696833	0.780386	1.04409	1.25484	1.51667	1.96875	2.61601	3.47893
0.114587	0.246094	0.246094	0.324593	0.369018	0.492188	0.550282	0.69841	0.786115	1.04409	1.25484	1.51896	1.96875	2.61676	3.47917
0.114818	0.246094	0.246094	0.325259	0.369759	0.492188	0.550282	0.70099	0.786263	1.04409	1.25484	1.51897	1.96875	2.61827	3.48029
0.114844	0.246094	0.246094	0.325702	0.370182	0.492188	0.550282	0.702255	0.788577	1.04409	1.25484	1.52573	1.96875	2.61858	3.48029
0.114844	0.246094	0.246094	0.326082	0.370183	0.492188	0.550282	0.704943	0.788973	1.04409	1.25484	1.5328	1.96875	2.62343	3.48029
0.114935	0.246094	0.246094	0.326544	0.370645	0.492188	0.550282	0.706173	0.789125	1.04409	1.25484	1.53479	1.97135	2.62348	3.48029
0.115164	0.246094	0.246094	0.327199	0.37133	0.492188	0.550282	0.706827	0.790787	1.04409	1.25484	1.53966	1.97605	2.62475	3.48624
0.115172	0.246094	0.246094	0.327274	0.372269	0.492188	0.550282	0.708607	0.793543	1.04409	1.25484	1.5479	1.98407	2.62537	3.49765
0.11541	0.246094	0.246094	0.327632	0.372618	0.492188	0.550282	0.714593	0.795526	1.04409	1.25484	1.54794	1.98407	2.62588	3.49765
0.115473	0.246094	0.246094	0.327636	0.372875	0.492188	0.550282	0.714739	0.795743	1.04409	1.25484	1.5483	1.98407	2.62638	3.49765
0.115486	0.246094	0.246094	0.32786	0.372892	0.492188	0.550282	0.715474	0.798401	1.04409	1.25484	1.55269	1.98407	2.62695	3.49765
0.115553	0.246094	0.246094	0.328681	0.373627	0.492188	0.550282	0.718787	0.799286	1.04409	1.25484	1.55643	1.98407	2.6296	3.49765
0.115562	0.246094	0.246094	0.328724	0.373875	0.492188	0.550282	0.720028	0.803655	1.04409	1.25484	1.55643	1.98407	2.63145	3.50872
0.115831	0.246094	0.246094	0.329031	0.374525	0.492188	0.550282	0.720356	0.807789	1.04409	1.25484	1.55643	1.98407	2.63287	3.51025
0.115911	0.246094	0.246094	0.329457	0.376571	0.492188	0.550282	0.723103	0.811195	1.04409	1.25484	1.55643	1.98407	2.639	3.51093
0.11592	0.246094	0.246094	0.329793	0.376936	0.492188	0.550282	0.723613	0.815756	1.04409	1.25558	1.55643	1.98407	2.64943	3.51547
0.115989	0.246094	0.246094	0.33006	0.378404	0.492188	0.550282	0.723857	0.818633	1.04409	1.25584	1.55643	1.98407	2.65051	3.52353
0.115998	0.246094	0.246094	0.330626	0.379213	0.492188	0.550282	0.724541	0.825122	1.04409	1.26011	1.55643	1.98407	2.65051	3.52353
0.116109	0.246094	0.246094	0.330752	0.379282	0.492188	0.550282	0.72532	0.826401	1.04409	1.26146	1.55643	1.98407	2.65051	3.53532
0.116378	0.246094	0.246094	0.331162	0.379414	0.492188	0.550282	0.72555	0.827245	1.04409	1.26475	1.55643	1.98407	2.65051	3.54921
0.116549	0.246094	0.246094	0.331253	0.380699	0.492188	0.550282	0.727024	0.828388	1.04409	1.26488	1.55643	1.98407	2.65051	3.57516
0.116554	0.246094	0.246094	0.331689	0.380897	0.492188	0.550282	0.728177	0.833647	1.04409	1.26927	1.55643	1.98407	2.65655	3.58318
0.116561	0.246094	0.246094	0.331904	0.38118	0.492188	0.550282	0.728322	0.833783	1.04409	1.26967	1.55643	1.98427	2.6592	3.58318
0.116604	0.246094	0.246094	0.332356	0.381242	0.492188	0.550282	0.728414	0.834451	1.04409	1.27044	1.55643	1.98525	2.66007	3.58357
0.11661	0.246094	0.246094	0.332399	0.382007	0.492188	0.550282	0.731211	0.835334	1.04409	1.2712	1.55643	1.98768	2.66191	3.59674
0.116708	0.246094	0.246094	0.333668	0.382388	0.492188	0.550282	0.73147	0.837623	1.04409	1.27509	1.55643	1.99392	2.66191	3.59787
0.116755	0.246094	0.246094	0.33375	0.382567	0.492188	0.550282	0.732524	0.838073	1.04409	1.27531	1.56252	1.9964	2.66306	3.59812
0.116831	0.246094	0.246094	0.333874	0.383707	0.492188	0.550282	0.733469	0.838793	1.04409	1.27633	1.5636	1.99784	2.66676	3.60402
0.117147	0.246094	0.246094	0.334104	0.383954	0.492188	0.550282	0.735219	0.839123	1.04728	1.27745	1.56845	2.00516	2.66832	3.60958
0.117332	0.246094	0.246094	0.334891	0.384274	0.492188	0.550282	0.735291	0.840338	1.04859	1.27752	1.57076	2.00688	2.67285	3.61428
0.117443	0.246094	0.246094	0.334899	0.384453	0.492188	0.550282	0.737214	0.840961	1.0503	1.27932	1.57138	2.01147	2.67397	3.62633
0.117518	0.246094	0.246094	0.336401	0.384872	0.492188	0.550282	0.738207	0.843124	1.05213	1.28027	1.57285	2.01289	2.6806	3.62757
0.117627	0.246094	0.246094	0.337017	0.385375	0.492188	0.550282	0.738281	0.845614	1.05477	1.28342	1.57577	2.0131	2.68297	3.62902
0.117751	0.246094	0.246094	0.337248	0.386081	0.492188	0.550282	0.738281	0.84629	1.05737	1.2858	1.57577	2.01956	2.68548	3.63393
0.118065	0.246094	0.246094	0.337637	0.387719	0.492188	0.550282	0.738281	0.846521	1.05797	1.28622	1.57577	2.02441	2.68611	3.63863
0.118187	0.246094	0.246094	0.338001	0.388987	0.492188	0.550282	0.738281	0.848518	1.05852	1.28863	1.57577	2.02526	2.68685	3.64061
0.118203	0.246094	0.246094	0.338616	0.389513	0.492188	0.550282	0.738281	0.850735	1.06082	1.28864	1.57577	2.02665	2.69035	3.658
0.118312	0.246094	0.246094	0.338946	0.389985	0.492188	0.550282	0.738281	0.851916	1.06505	1.28986	1.57577	2.02934	2.69794	3.65845
0.118368	0.246094	0.246094	0.339019	0.390831	0.492188	0.550282	0.738281	0.852421	1.06787	1.28992	1.57577	2.02934	2.7009	3.65845
0.118394	0.246094	0.246094	0.339441	0.391108	0.492188	0.550282	0.738281	0.852706	1.06794	1.29245	1.57577	2.02934	2.70387	3.65845
0.118505	0.246094	0.246094	0.339921	0.391806	0.492188	0.550282	0.738281	0.852708	1.06925	1.29459	1.57577	2.02934	2.7061	3.65845
0.118531	0.246094	0.246094	0.34145	0.392329	0.492188	0.550282	0.738281	0.85484	1.07043	1.29587	1.57577	2.02934	2.70641	3.65845
0.118866	0.246094	0.246094	0.341555	0.392579	0.492188	0.550282	0.738281	0.859361	1.07321	1.29623	1.57577	2.02934	2.7068	3.65845
0.118974	0.246094	0.246094	0.341782	0.393483	0.492188	0.550282	0.738281	0.861827	1.07471	1.29653	1.57577	2.02934	2.70703	3.65845
0.118977	0.246094	0.246094	0.342113	0.393913	0.492188	0.550282	0.738281	0.863531	1.07493	1.29759	1.57577	2.02934	2.70826	3.65845
0.119124	0.246094	0.246094	0.342856	0.394351	0.492188	0.550282	0.738281	0.864551	1.07502	1.29844	1.57577	2.02934	2.70958	3.65845
0.119234	0.246094	0.246094	0.343922	0.394938	0.492188	0.550282	0.738281	0.872882	1.07706	1.30185	1.57577	2.02934	2.71059	3.65845
0.119241	0.246094	0.246094	0.344091	0.394943	0.492188	0.550282	0.738281	0.876722	1.0781	1.30197	1.57577	2.02934	2.71152	3.65845
0.119259	0.246094	0.246094	0.344212	0.395188	0.492188	0.550282	0.738281	0.882835	1.07813	1.30362	1.57577	2.02934	2.71819	3.65845
0.119272	0.246094	0.246094	0.344687	0.39607	0.492188	0.550282	0.738281	0.887304	1.07887	1.30411	1.57577	2.02934	2.71819	3.65845
0.119312	0.246094	0.246094	0.345375	0.396391	0.492188	0.550282	0.738281	0.887304	1.07971	1.30422	1.57577	2.02934	2.71819	3.65845
0.119344	0.246094	0.246094	0.345387	0.396553	0.492188	0.550282	0.738281	0.887304	1.08005	1.30444	1.57577	2.02934	2.72321	3.65845
0.119389	0.246094	0.246094	0.34576	0.397387	0.492188	0.550282	0.738281	0.887304	1.08132	1.30685	1.57577	2.02934	2.72683	3.65845
0.119458	0.246094	0.246094	0.345767	0.400655	0.492188	0.550282	0.738281	0.887304	1.08202	1.30741	1.57577	2.02934	2.72753	3.65845
0.119521	0.246094	0.246094	0.345897	0.401265	0.492188	0.550282	0.738281	0.887304	1.08234	1.30827	1.5769	2.03575	2.72906	3.65845
0.119802	0.246094	0.246094	0.346055	0.401759	0.492188	0.550282	0.738281	0.887304	1.08237	1.31047	1.57784	2.03637	2.73623	3.65845
0.119907	0.246094	0.246094	0.346733	0.402383	0.492188	0.550282	0.738281	0.887304	1.08345	1.315	1.5797	2.0384	2.74512	3.65845
0.120062	0.246094	0.246094	0.347374	0.403452	0.492188	0.550282	0.738281	0.887304	1.08533	1.31584	1.57982	2.04779	2.75141	3.65845
0.120253	0.246094	0.246094	0.347585	0.403868	0.492188	0.550282	0.738281	0.887304	1.08788	1.31789	1.58233	2.04781	2.75141	3.65845
0.12033	0.246094	0.246094	0.347942	0.404213	0.492188	0.550282	0.738281	0.887304	1.08988	1.31836	1.58415	2.04872	2.75141	3.66509
0.120498	0.246094	0.246094	0.348029	0.409002	0.492188	0.550282	0.738281	0.887304	1.09	1.31862	1.58898	2.04979	2.75141	3.6662
0.120748	0.246094	0.246094	0.348029	0.409271	0.492188	0.550282	0.738281	0.887304	1.09012	1.32019	1.5918	2.05169	2.75141	3.67306
0.120787	0.246094	0.246094	0.348029	0.409637	0.492188	0.550282	0.738281	0.887304	1.09145	1.32231	1.59263	2.0534	2.75141	3.67834
0.120927	0.246094	0.246094	0.348029	0.410337	0.492188	0.550282	0.738281	0.887304	1.09637	1.3246	1.59307	2.0673	2.75141	3.67935
0.120966	0.246094	0.246094	0.348029	0.410367	0.492188	0.550282	0.738281	0.887304	1.1001	1.32526	1.5932	2.06875	2.75141	3.6865
0.121726	0.246094	0.246094	0.348029	0.412776	0.492188	0.550282	0.738281	0.887304	1.10056	1.32526	1.59457	2.06915	2.75141	3.69044
0.121764	0.246094	0.246094	0.348029	0.413404	0.492188	0.550282	0.738281	0.887304	1.10056	1.32526	1.59804	2.07271	2.75141	3.69141
0.121937	0.246094	0.246094	0.348029	0.414255	0.492188	0.550282	0.738281	0.887304	1.10056	1.32526	1.59861	2.07464	2.75141	3.69141
0.122028	0.246094	0.246094	0.348029	0.414825	0.492188	0.550282	0.738281	0.887304	1.10056	1.32526	1.60018	2.07471	2.75141	3.69141
0.122205	0.246094	0.246094	0.348029	0.415039	0.492188	0.550282	0.738281	0.887304	1.10056	1.32526	1.60757	2.08127	2.75141	3.69141
0.122279	0.246094	0.246094	0.348029	0.415427	0.492188	0.550282	0.738281	0.887304	1.10056	1.32526	1.60782	2.08419	2.75141	3.69141
0.122327	0.246094	0.246094	0.348029	0.415586	0.492188	0.550282	0.738281	0.887304	1.10056	1.32526	1.61192	2.08526	2.75141	3.69141
0.122603	0.246094	0.246094	0.348029	0.415926	0.492188	0.550282	0.738281	0.887304	1.10056	1.32526	1.61382	2.08817	2.75141	3.6958
0.122793	0.246094	0.246094	0.348029	0.416012	0.492188	0.550282	0.738281	0.887304	1.10056	1.32526	1.61612	2.08817	2.75141	3.6996
0.122812	0.246094	0.246094	0.348029	0.416059	0.492188	0.550282	0.738281	0.887304	1.10056	1.32526	1.61812	2.08817	2.75141	3.6996
0.122972	0.246094	0.246094	0.348029	0.416318	0.492188	0.551871	0.738281	0.887304	1.10056	1.32526	1.61821	2.08817	2.75558	3.6996
0.123103	0.246094	0.246094	0.348029	0.416403	0.492188	0.55258	0.738281	0.887304	1.10056	1.32526	1.61906	2.09225	2.75878	3.70073
0.12314	0.246094	0.246094	0.348029	0.417212	0.492188	0.552623	0.738281	0.887304	1.10056	1.32526	1.62078	2.09296	2.76394	3.71344
0.123234	0.246094	0.246094	0.348029	0.417304	0.492188	0.553135	0.738281	0.887304	1.10056	1.32526	1.62371	2.10199	2.76945	3.72054
0.12324	0.246094	0.246094	0.348029	0.417426	0.492188	0.553204	0.738281	0.887304	1.10056	1.32526	1.6259	2.10263	2.76958	3.72055
0.123246	0.246094	0.246094	0.348029	0.417513	0.492188	0.556285	0.738281	0.887304	1.10056	1.32526	1.62665	2.10263	2.77167	3.72407
0.12332	0.246094	0.246094	0.348029	0.419016	0.492188	0.556311	0.738281	0.887304	1.10056	1.32526	1.63437	2.10263	2.77397	3.72407
0.123393	0.246094	0.246094	0.348029	0.420352	0.492188	0.556676	0.738281	0.887304	1.10056	1.32526	1.63469	2.10263	2.77449	3.72407
0.12348	0.246094	0.246094	0.348029	0.421002	0.492188	0.556707	0.738281	0.887304	1.10056	1.32526	1.63504	2.10263	2.77557	3.72407
0.123504	0.246094	0.246094	0.348029	0.421185	0.492188	0.557188	0.738281	0.887304	1.10056	1.32526	1.63808	2.10263	2.77604	3.72407
0.123754	0.246094	0.246094	0.348029	0.421297	0.492188	0.557998	0.738281	0.888005	1.10056	1.32526	1.65085	2.10263	2.77765	3.72984
0.123838	0.246094	0.246094	0.348029	0.421513	0.492188	0.558364	0.738281	0.889244	1.10056	1.32526	1.65085	2.10853	2.78103	3.73681
0.124059	0.246094	0.246094	0.348029	0.422687	0.492188	0.560606	0.738281	0.895883	1.10056	1.32526	1.65085	2.11158	2.78587	3.74839
0.124093	0.246094	0.246094	0.348029	0.425052	0.492188	0.560686	0.738281	0.898381	1.10056	1.32526	1.65085	2.11183	2.78636	3.74839
0.124157	0.246094	0.246094	0.348029	0.425776	0.492188	0.562637	0.738281	0.89968	1.10056	1.32526	1.65085	2.11492	2.78706	3.74839
0.124165	0.246094	0.246094	0.348029	0.427456	0.492188	0.564297	0.738281	0.901912	1.10056	1.32526	1.65085	2.11698	2.78709	3.74839
0.124226	0.246094	0.246094	0.348029	0.428873	0.492188	0.564615	0.738281	0.902132	1.10056	1.32526	1.65085	2.11698	2.7887	3.74839
0.124637	0.246094	0.246094	0.348029	0.431357	0.492188	0.564725	0.738281	0.90665	1.10056	1.32526	1.65085	2.11698	2.78976	3.75646
0.124646	0.246094	0.246094	0.348029	0.431618	0.492188	0.564833	0.738281	0.912867	1.10056	1.32526	1.65085	2.11698	2.79632	3.75646
0.124773	0.246094	0.246094	0.348029	0.431976	0.492188	0.565349	0.738281	0.914016	1.10056	1.32526	1.65085	2.11698	2.79859	3.75646
0.124837	0.246094	0.246094	0.348029	0.433103	0.492188	0.567632	0.738281	0.914087	1.10056	1.32526	1.65085	2.11698	2.80308	3.75646
0.124872	0.246094	0.246094	0.348029	0.433119	0.492188	0.56773	0.738281	0.915645	1.10056	1.32526	1.65085	2.11698	2.80324	3.76451
0.124906	0.246094	0.246094	0.348029	0.433121	0.492188	0.568907	0.738281	0.916842	1.10056	1.32526	1.65093	2.11698	2.8059	3.76451
0.124954	0.246094	0.246094	0.348029	0.433384	0.492188	0.570306	0.738281	0.918131	1.10056	1.32526	1.65281	2.11698	2.8059	3.76451
0.124973	0.246094	0.246094	0.348029	0.433833	0.492188	0.572184	0.738281	0.91919	1.10056	1.32526	1.65761	2.11698	2.8059	3.78278
0.125829	0.246094	0.246094	0.348029	0.434573	0.492188	0.573814	0.738281	0.923253	1.10056	1.32526	1.65786	2.11698	2.8059	3.78307
0.125851	0.246094	0.246094	0.348029	0.435184	0.492188	0.574269	0.738281	0.926399	1.10363	1.32526	1.66006	2.11698	2.8059	3.78742
0.12591	0.246094	0.246094	0.348029	0.435459	0.492188	0.57545	0.738281	0.937921	1.10463	1.32526	1.66044	2.11698	2.8059	3.8204
0.125914	0.246094	0.246094	0.348029	0.435574	0.492188	0.575571	0.738281	0.938928	1.10474	1.32526	1.66101	2.11698	2.8059	3.8204
0.125996	0.246094	0.246094	0.348029	0.435741	0.492188	0.581376	0.738281	0.939027	1.10523	1.32526	1.66249	2.11698	2.8059	3.8204
0.126091	0.246094	0.246094	0.348029	0.436624	0.492188	0.581751	0.738281	0.939123	1.10632	1.32526	1.66484	2.11698	2.8059	3.82832
0.126114	0.246094	0.246094	0.348029	0.436674	0.492188	0.582997	0.738281	0.940404	1.10719	1.32841	1.66849	2.11698	2.80694	3.82832
0.126395	0.246094	0.246094	0.348029	0.436902	0.492188	0.583008	0.738281	0.944093	1.11007	1.32937	1.66893	2.11698	2.81049	3.84073
0.126402	0.246094	0.246094	0.348029	0.438915	0.492188	0.586415	0.738281	0.944255	1.1128	1.3331	1.67059	2.11698	2.81389	3.84411
0.126925	0.246094	0.246094	0.348029	0.43935	0.492188	0.58729	0.738281	0.94427	1.11323	1.3338	1.67337	2.11698	2.81702	3.84411
0.126985	0.246094	0.246094	0.348029	0.439767	0.492188	0.588975	0.738281	0.945046	1.11466	1.33415	1.67421	2.11698	2.82065	3.84411
0.126988	0.246094	0.246094	0.348029	0.440464	0.492188	0.589476	0.738281	0.946873	1.11488	1.33839	1.67574	2.12248	2.82135	3.84411
0.127015	0.246094	0.246094	0.348029	0.440856	0.492188	0.590068	0.738281	0.948115	1.11575	1.34034	1.67645	2.12318	2.82434	3.84411
0.127043	0.246094	0.246094	0.348029	0.441504	0.492188	0.590283	0.738281	0.948943	1.11752	1.34142	1.68269	2.1256	2.83075	3.84411
0.127051	0.246094	0.246094	0.348029	0.44205	0.492188	0.591077	0.738281	0.949847	1.11938	1.34241	1.68725	2.1261	2.83108	3.84411
0.127069	0.246094	0.246094	0.348029	0.444761	0.492188	0.59256	0.738281	0.954038	1.12112	1.34268	1.69153	2.12963	2.83392	3.85084
0.127248	0.246094	0.246094	0.348029	0.444912	0.492188	0.592615	0.738281	0.954813	1.12517	1.34313	1.69176	2.13568	2.8414	3.85198
0.127265	0.246094	0.246094	0.348029	0.444962	0.492188	0.594461	0.738281	0.960568	1.13278	1.3437	1.69259	2.13811	2.85337	3.85198
0.127469	0.246094	0.246094	0.348029	0.445398	0.492188	0.595971	0.738281	0.960684	1.13573	1.34418	1.6984	2.14794	2.8542	3.85198
0.127526	0.246094	0.246094	0.348029	0.446455	0.492188	0.596077	0.738281	0.962097	1.13611	1.34431	1.69973	2.14931	2.861	3.85198
0.127736	0.246094	0.246094	0.348029	0.446498	0.492188	0.59615	0.738281	0.962284	1.1368	1.34538	1.70182	2.14946	2.86499	3.85198
0.127806	0.246094	0.246094	0.348029	0.447414	0.492188	0.596664	0.738281	0.962628	1.13753	1.34887	1.70229	2.15001	2.86907	3.86026
0.127881	0.246094	0.246094	0.348029	0.449966	0.492188	0.596723	0.738281	0.962911	1.13863	1.34946	1.70352	2.1519	2.86992	3.86666
0.127908	0.246094	0.246094	0.348029	0.450902	0.492188	0.598335	0.738281	0.963712	1.13878	1.34968	1.70502	2.15352	2.86992	3.8771
0.127988	0.246094	0.246094	0.348029	0.451105	0.492188	0.598967	0.738281	0.965322	1.13965	1.3501	1.70604	2.15695	2.86992	3.89108
0.128142	0.246094	0.246094	0.348029	0.452242	0.492188	0.599997	0.74088	0.969052	1.13999	1.35189	1.70765	2.15891	2.86992	3.89108
0.128338	0.246094	0.246094	0.348029	0.452543	0.492188	0.600098	0.743033	0.972312	1.14163	1.35238	1.70783	2.15894	2.86992	3.89108
0.128387	0.246094	0.246094	0.348029	0.452573	0.492188	0.600498	0.744914	0.978471	1.14216	1.35284	1.71184	2.15934	2.86992	3.89108
0.128658	0.246094	0.246094	0.348029	0.452708	0.49317	0.601596	0.745031	0.978947	1.14372	1.35314	1.71347	2.16011	2.86992	3.89108
0.128675	0.246094	0.246094	0.348029	0.452765	0.493381	0.601704	0.745116	0.980235	1.14614	1.35575	1.7135	2.1662	2.88045	3.89108
0.128678	0.246094	0.246094	0.348029	0.453177	0.493654	0.602237	0.746277	0.984375	1.14623	1.35651	1.71614	2.16652	2.88045	3.89108
0.129022	0.246094	0.246094	0.348029	0.454881	0.493971	0.602874	0.746476	0.984375	1.14736	1.35998	1.71739	2.16696	2.88045	3.89108
0.129081	0.246094	0.246094	0.348029	0.455294	0.494818	0.604605	0.74662	0.984375	1.14787	1.36332	1.71779	2.16778	2.88045	3.89108
0.129248	0.246094	0.246094	0.348029	0.45566	0.495426	0.606052	0.750098	0.984375	1.14881	1.36518	1.7181	2.17334	2.88368	3.89108
0.129252	0.246094	0.246094	0.348029	0.456189	0.495733	0.607124	0.750822	0.984375	1.14883	1.36723	1.71857	2.17974	2.8839	3.89108
0.129297	0.246094	0.246094	0.348029	0.456589	0.497448	0.609055	0.752791	0.984375	1.15518	1.36803	1.71899	2.1808	2.8896	3.89108
0.129317	0.246094	0.246094	0.348029	0.456961	0.497451	0.609102	0.753661	0.984375	1.1582	1.36856	1.72065	2.18383	2.89833	3.91699
0.129417	0.246094	0.246094	0.348029	0.457329	0.497607	0.609116	0.75377	0.984375	1.15879	1.3686	1.72135	2.19164	2.90668	3.9375
0.12955	0.246094	0.246094	0.348029	0.458626	0.499048	0.609116	0.755761	0.984375	1.15921	1.37027	1.72266	2.19619	2.90866	3.9411
0.129573	0.246094	0.246094	0.348029	0.459522	0.499238	0.609261	0.757358	0.984375	1.1617	1.37122	1.72266	2.19749	2.90908	3.94494
0.129574	0.246094	0.246094	0.348029	0.459544	0.501273	0.609698	0.757973	0.984375	1.16175	1.37457	1.72266	2.20113	2.91017	3.96517
0.129824	0.246094	0.246094	0.348029	0.460837	0.501891	0.609834	0.7586	0.984375	1.16564	1.37758	1.72266	2.20113	2.9112	3.96814
0.129985	0.246094	0.246094	0.348029	0.461142	0.502443	0.612847	0.763439	0.984375	1.16643	1.38252	1.72266	2.20896	2.9226	3.96814
0.130076	0.246094	0.246094	0.348029	0.461756	0.502892	0.613493	0.764027	0.984375	1.1678	1.38317	1.72266	2.21484	2.9227	3.96814
0.13031	0.246094	0.246094	0.348029	0.461789	0.504228	0.616094	0.764321	0.984375	1.16807	1.38566	1.72266	2.21484	2.92295	3.97107
0.130395	0.246094	0.246094	0.348029	0.461823	0.504787	0.617565	0.765655	0.984375	1.16914	1.38652	1.72266	2.21484	2.92948	3.97395
0.13044	0.246094	0.246094	0.348029	0.461974	0.504844	0.617925	0.767209	0.984375	1.16966	1.3878	1.72266	2.21498	2.93052	3.97537
0.130697	0.246094	0.246094	0.348029	0.462364	0.505421	0.618661	0.767984	0.984375	1.17114	1.3879	1.72266	2.21741	2.93213	3.97577
0.130716	0.246094	0.246094	0.348029	0.4626	0.505762	0.619348	0.770754	0.984375	1.17118	1.39053	1.72964	2.21746	2.93461	3.97577
0.130786	0.246094	0.246094	0.348029	0.462656	0.507916	0.6218	0.771843	0.984375	1.1726	1.39212	1.73001	2.222	2.93541	3.97577
0.131041	0.246094	0.246094	0.348029	0.463674	0.509013	0.622333	0.773839	0.984375	1.17317	1.39212	1.73033	2.22695	2.93638	3.97577
0.131086	0.246094	0.246094	0.348029	0.465228	0.512782	0.622836	0.775152	0.984375	1.17338	1.39212	1.73241	2.22847	2.9422	3.97577
0.131108	0.246094	0.246094	0.348029	0.465704	0.512913	0.623583	0.777584	0.984375	1.17415	1.39212	1.73374	2.22847	2.94588	3.97577
0.131123	0.246094	0.246094	0.348029	0.465784	0.51343	0.625908	0.778217	0.984375	1.17528	1.39212	1.7359	2.22847	2.94735	3.98802
0.131452	0.246094	0.246094	0.348029	0.46587	0.514948	0.628419	0.778217	0.984375	1.17715	1.39212	1.73863	2.22847	2.95312	3.99382
0.131731	0.246094	0.246094	0.348029	0.466289	0.516238	0.628753	0.778217	0.984375	1.1782	1.39212	1.73873	2.22847	2.95312	4.00368
0.131776	0.246094	0.246094	0.348029	0.467037	0.516662	0.629224	0.778217	0.984375	1.17999	1.39212	1.73989	2.23355	2.95312	4.03624
0.131842	0.246094	0.246094	0.348029	0.468701	0.521379	0.629394	0.778217	0.984375	1.18005	1.39212	1.74015	2.23444	2.95312	4.03624
0.131871	0.246094	0.246094	0.348029	0.46923	0.523773	0.63302	0.778217	0.984375	1.18077	1.39212	1.74015	2.23776	2.95312	4.03624
0.13201	0.246094	0.246094	0.348029	0.469468	0.524386	0.633854	0.778217	0.984375	1.18148	1.39212	1.74015	2.23839	2.96014	4.03624
0.132058	0.246094	0.246094	0.348029	0.469471	0.524458	0.634141	0.778217	0.984375	1.1815	1.39212	1.74015	2.24035	2.96336	4.03624
0.132072	0.246094	0.246094	0.348029	0.470286	0.526049	0.635606	0.778217	0.984375	1.18183	1.39212	1.74015	2.24586	2.96336	4.05428
0.132073	0.246094	0.246094	0.348029	0.471361	0.527597	0.636044	0.778217	0.984375	1.18475	1.39242	1.74015	2.24802	2.96336	4.05868
0.132361	0.246094	0.246094	0.348029	0.471913	0.529363	0.637602	0.778217	0.984375	1.18708	1.39331	1.74015	2.24958	2.96336	4.05868
0.132493	0.246094	0.246094	0.348029	0.474272	0.530678	0.638647	0.778217	0.984375	1.18943	1.39395	1.74015	2.25228	2.96336	4.05868
0.132946	0.246094	0.246094	0.348029	0.475523	0.530973	0.639217	0.778217	0.984375	1.19154	1.39484	1.74015	2.25414	2.96336	4.07358
0.133192	0.246094	0.246094	0.348029	0.475689	0.531196	0.641084	0.778217	0.984375	1.19257	1.39575	1.74015	2.25876	2.96657	4.07358
0.133253	0.246094	0.246094	0.348029	0.475766	0.532588	0.64115	0.778217	0.984375	1.19259	1.39696	1.74015	2.25898	2.96716	4.07358
0.134444	0.246094	0.246094	0.348029	0.47675	0.532972	0.641368	0.778217	0.984375	1.1927	1.39886	1.74015	2.26072	2.97356	4.07358
0.134652	0.246094	0.246094	0.348029	0.477257	0.533838	0.642313	0.778217	0.984375	1.19296	1.40105	1.74015	2.26165	2.97356	4.09582
0.134701	0.246094	0.246094	0.348029	0.477517	0.535708	0.642897	0.778217	0.984375	1.1941	1.40116	1.74015	2.26363	2.97356	4.09582
0.134841	0.246094	0.246094	0.348029	0.478104	0.536577	0.643201	0.778217	0.984375	1.19439	1.40257	1.74015	2.26443	2.97356	4.09582
0.135051	0.246094	0.246094	0.348029	0.478176	0.536851	0.643773	0.778217	0.984375	1.19524	1.40629	1.74015	2.26465	2.97356	4.09582
0.135192	0.246094	0.246094	0.348029	0.478884	0.538343	0.644966	0.778217	0.984375	1.19561	1.40691	1.74015	2.26525	2.97356	4.09847
0.135269	0.246094	0.246094	0.348029	0.479267	0.538704	0.646576	0.778217	0.984375	1.19573	1.40752	1.74015	2.26887	2.97356	4.10073
0.135416	0.246094	0.246094	0.348029	0.480045	0.538738	0.647109	0.778217	0.984375	1.19634	1.40891	1.74015	2.26887	2.97753	4.1076
0.135437	0.246094	0.246094	0.348029	0.481517	0.544364	0.647323	0.778217	0.984375	1.19707	1.41376	1.74015	2.26887	2.97831	4.12411
0.135573	0.246094	0.246094	0.348029	0.481543	0.547405	0.650517	0.778217	0.984375	1.19866	1.41412	1.74015	2.26887	2.98265	4.12509
0.135766	0.246094	0.246094	0.348029	0.481865	0.547571	0.652653	0.778217	0.984375	1.19944	1.41416	1.74015	2.26887	2.98783	4.12528
0.135817	0.246094	0.246094	0.348029	0.482235	0.548373	0.657137	0.778217	0.984375	1.20133	1.41527	1.74015	2.26887	2.98946	4.12528
0.135865	0.246094	0.246094	0.348029	0.482259	0.549216	0.657957	0.778217	0.98505	1.20163	1.41999	1.74015	2.26887	2.99239	4.12528
0.135929	0.246094	0.246094	0.348029	0.482691	0.549729	0.659299	0.778217	0.988848	1.20167	1.42485	1.74015	2.26887	2.99319	4.12528
0.136104	0.246094	0.246094	0.348029	0.482907	0.550249	0.660546	0.778217	0.989405	1.20525	1.42505	1.74015	2.26887	2.99365	4.12528
0.136672	0.246094	0.246094	0.348029	0.483232	0.550282	0.661007	0.778217	0.989634	1.20553	1.42584	1.74015	2.26887	2.99386	4.12859
0.136679	0.246094	0.246094	0.348029	0.484748	0.550282	0.666883	0.778217	0.99491	1.20558	1.42819	1.74015	2.26887	2.99386	4.1324
0.13668	0.246094	0.246094	0.348029	0.487734	0.550282	0.668864	0.778217	0.996825	1.20578	1.42865	1.74015	2.26887	2.99391	4.14969
0.136981	0.246094	0.246094	0.348029	0.48778	0.550282	0.673154	0.778217	0.997125	1.20591	1.42889	1.74015	2.26975	2.99584	4.16143
0.137081	0.246094	0.246094	0.348029	0.488162	0.550282	0.675218	0.778217	0.998767	1.20715	1.43243	1.74015	2.27093	2.99627	4.17635
0.137101	0.246094	0.246094	0.348029	0.488564	0.550282	0.677539	0.778217	0.999497	1.20757	1.433	1.74015	2.27231	2.99661	4.18359
0.137134	0.246094	0.246094	0.348029	0.490479	0.550282	0.679274	0.778217	1.00055	1.21038	1.43426	1.74015	2.27514	2.99754	4.18359
0.137351	0.246094	0.246094	0.348029	0.490997	0.550282	0.681778	0.778217	1.00175	1.21091	1.43456	1.74206	2.27616	2.99808	4.18639
0.137548	0.246094	0.246094	0.348029	0.49169	0.550282	0.681993	0.778217	1.00183	1.21209	1.43496	1.74289	2.27706	3.00037	4.18881
0.137784	0.246094	0.246094	0.348029	0.492188	0.550282	0.686812	0.778217	1.00349	1.21359	1.43496	1.7453	2.27943	3.00396	4.20525
0.137827	0.246094	0.246094	0.348029	0.492188	0.550282	0.686835	0.778217	1.00352	1.21628	1.43496	1.74601	2.28091	3.00396	4.20525
0.137874	0.246094	0.246094	0.348029	0.492188	0.550282	0.687152	0.778217	1.00434	1.21633	1.43496	1.74752	2.28332	3.00396	4.23396
0.137929	0.246094	0.246094	0.348029	0.492188	0.550282	0.687559	0.778217	1.00533	1.2168	1.43496	1.74786	2.28506	3.00396	4.23396
0.138128	0.246094	0.246094	0.348029	0.492188	0.550282	0.688981	0.778217	1.00569	1.21756	1.43496	1.74879	2.28652	3.00396	4.23396
0.138128	0.246094	0.246094	0.348029	0.492188	0.550282	0.689786	0.778217	1.00765	1.22143	1.43496	1.7488	2.29241	3.00396	4.23396
0.13829	0.246094	0.246094	0.348029	0.492188	0.550282	0.690486	0.778217	1.00814	1.22226	1.43496	1.75104	2.29379	3.00396	4.23396
0.138343	0.246094	0.246094	0.348029	0.492188	0.550282	0.690672	0.778217	1.00918	1.22266	1.43496	1.75151	2.2942	3.00396	4.23396
0.138631	0.246094	0.246094	0.348029	0.492188	0.550282	0.691799	0.778217	1.01087	1.22386	1.43496	1.75329	2.29463	3.00594	4.23651
0.138683	0.246094	0.246134	0.348029	0.492188	0.550282	0.693474	0.778217	1.01467	1.22534	1.43496	1.76154	2.29504	3.01433	4.24824
0.138725	0.246094	0.246177	0.348029	0.492188	0.550282	0.694854	0.778217	1.01467	1.22559	1.43496	1.76173	2.29509	3.015	4.29784
0.13903	0.246094	0.246248	0.348029	0.492188	0.550282	0.695809	0.778217	1.01467	1.22587	1.43496	1.76191	2.29924	3.01861	4.29982
0.139074	0.246094	0.246259	0.348029	0.492188	0.550282	0.696058	0.778217	1.01467	1.22593	1.43496	1.76341	2.30038	3.02634	4.30488
0.139089	0.246094	0.246292	0.348029	0.492188	0.550282	0.696058	0.778217	1.01467	1.22992	1.43496	1.76397	2.30059	3.03263	4.30488
0.139367	0.246094	0.247267	0.348029	0.492188	0.550282	0.696058	0.778217	1.01467	1.23047	1.43496	1.764	2.30117	3.03884	4.30488
0.139375	0.246094	0.247414	0.348029	0.492188	0.550282	0.696058	0.778217	1.01467	1.23047	1.43496	1.76407	2.30311	3.04401	4.30488
0.13958	0.246094	0.247945	0.348029	0.492188	0.550282	0.696058	0.778217	1.01467	1.23047	1.43496	1.76496	2.31167	3.04526	4.30488
0.139864	0.246094	0.24824	0.348029	0.492188	0.550282	0.696058	0.778217	1.01467	1.23047	1.43496	1.76536	2.32164	3.04547	4.30488
0.139882	0.246094	0.248739	0.348029	0.492188	0.550282	0.696058	0.778217	1.01467	1.23047	1.43496	1.76611	2.32164	3.05299	4.30488
0.140042	0.246094	0.249036	0.348029	0.492188	0.550282	0.696058	0.778217	1.01467	1.23047	1.43496	1.76712	2.32164	3.05933	4.30488
0.140581	0.246094	0.249112	0.348029	0.492188	0.550282	0.696058	0.778217	1.01467	1.23047	1.43496	1.77192	2.32164	3.06285	4.31193
0.140721	0.246094	0.249339	0.348029	0.492188	0.550282	0.696058	0.778217	1.01467	1.23047	1.43496	1.77431	2.32164	3.06554	4.32959
0.140954	0.246094	0.249437	0.348029	0.492188	0.550282	0.696058	0.778217	1.01467	1.23047	1.43496	1.77461	2.32164	3.06571	4.32973
0.141138	0.246094	0.24945	0.348029	0.492188	0.550282	0.696058	0.778217	1.01467	1.23047	1.43496	1.77461	2.32164	3.07209	4.3441
0.141219	0.246094	0.250036	0.348029	0.492188	0.550282	0.696058	0.778217	1.01467	1.23047	1.43496	1.77461	2.32164	3.07775	4.35463
0.141416	0.246094	0.250121	0.348029	0.492188	0.550282	0.696058	0.778217	1.01467	1.23047	1.43496	1.77461	2.32164	3.07979	4.36079
0.141501	0.246094	0.250494	0.348029	0.492188	0.550282	0.696058	0.778217	1.01467	1.23047	1.43496	1.77461	2.32164	3.08355	4.36079
0.141873	0.246094	0.250721	0.348029	0.492188	0.550282	0.696058	0.778217	1.01467	1.23047	1.43496	1.77461	2.32164	3.08355	4.36079
0.142139	0.246094	0.250732	0.348029	0.492188	0.550282	0.696058	0.778217	1.01467	1.23047	1.43496	1.77461	2.32198	3.08355	4.38157
0.142281	0.246094	0.25077	0.348029	0.492188	0.550282	0.696058	0.778217	1.01467	1.23047	1.43496	1.77461	2.32276	3.08355	4.38157
0.1423	0.246094	0.251173	0.348029	0.492188	0.550282	0.696058	0.778217	1.01467	1.23047	1.43496	1.77461	2.32553	3.08355	4.40226
0.142313	0.246094	0.251447	0.348029	0.492188	0.550282	0.696058	0.778217	1.01467	1.23047	1.43496	1.77461	2.32748	3.08355	4.43652
0.142753	0.246094	0.251537	0.348029	0.492188	0.550282	0.696058	0.778217	1.01467	1.23047	1.43496	1.77461	2.32967	3.08355	4.43652
0.142819	0.246094	0.251618	0.348029	0.492188	0.550282	0.696058	0.778217	1.01467	1.23047	1.43496	1.77569	2.33054	3.08677	4.43652
0.142931	0.246094	0.252595	0.348029	0.492188	0.550282	0.696058	0.778217	1.01467	1.23047	1.43496	1.77627	2.33433	3.08837	4.43652
0.143138	0.246094	0.252705	0.348029	0.492188	0.550282	0.696058	0.778217	1.01467	1.23047	1.43496	1.78115	2.33465	3.09659	4.43652
0.143246	0.246094	0.252756	0.348029	0.492188	0.550282	0.696058	0.778564	1.01467	1.23047	1.43496	1.78134	2.33465	3.10242	4.43652
0.143338	0.246094	0.252853	0.348029	0.492188	0.550282	0.696058	0.782652	1.01467	1.23047	1.43496	1.78357	2.33465	3.10271	4.43652
0.143615	0.246094	0.253339	0.348029	0.492188	0.550282	0.696058	0.783432	1.01467	1.23047	1.43496	1.78901	2.33465	3.10433	4.43652
0.143722	0.246094	0.253357	0.348029	0.492188	0.550282	0.696058	0.784131	1.01467	1.23047	1.43496	1.79159	2.33465	3.1096	4.44087
0.14375	0.246094	0.253734	0.348029	0.492188	0.550282	0.696058	0.784498	1.01467	1.23047	1.43496	1.79159	2.33509	3.11287	4.51768
0.14375	0.246094	0.253754	0.348029	0.492188	0.550282	0.696058	0.786394	1.01467	1.23047	1.43496	1.79159	2.33654	3.11287	4.52438
0.14376	0.246094	0.253893	0.348029	0.492188	0.550282	0.696058	0.790264	1.01467	1.23047	1.43496	1.79159	2.3406	3.11287	4.56913
0.14412	0.246094	0.253958	0.348029	0.492188	0.550282	0.696058	0.793454	1.01467	1.23047	1.43798	1.79159	2.3414	3.11287	4.57761
0.144217	0.246094	0.25448	0.348029	0.492188	0.550282	0.696058	0.793692	1.01467	1.23047	1.43828	1.79159	2.34241	3.11287	4.57761
0.144392	0.246094	0.255036	0.348029	0.492188	0.550282	0.696058	0.79675	1.01467	1.23047	1.43881	1.79159	2.3427	3.11287	4.57761
0.144527	0.246094	0.255582	0.348029	0.492188	0.550282	0.696058	0.798797	1.01467	1.23047	1.43925	1.79159	2.34288	3.12641	4.57761
0.14465	0.246094	0.256032	0.348029	0.492188	0.550282	0.696058	0.805015	1.01467	1.23047	1.4395	1.79329	2.34524	3.13226	4.57761
0.144687	0.246094	0.256038	0.348029	0.492188	0.550282	0.696058	0.808023	1.01467	1.23047	1.44194	1.79384	2.34629	3.13226	4.59741
0.144701	0.246094	0.256064	0.348029	0.492188	0.550282	0.696058	0.809129	1.01467	1.23047	1.44349	1.7957	2.34748	3.13226	4.59741
0.144843	0.246094	0.25648	0.348029	0.492188	0.550282	0.696058	0.809265	1.01467	1.23047	1.44701	1.79575	2.34874	3.13226	4.61756
0.144892	0.246094	0.256738	0.348029	0.492188	0.550282	0.696058	0.817612	1.01467	1.23047	1.4471	1.79752	2.35013	3.13478	4.62368
0.145071	0.246094	0.256764	0.348029	0.492188	0.550282	0.696058	0.818579	1.01467	1.23047	1.44768	1.7978	2.35079	3.13786	4.6264
0.145255	0.246094	0.257107	0.348029	0.492188	0.550282	0.696058	0.820868	1.01467	1.23047	1.4495	1.79948	2.35118	3.14013	4.64329
0.145263	0.246094	0.257711	0.348029	0.492188	0.550282	0.696058	0.822945	1.01467	1.23047	1.44953	1.79953	2.35303	3.15154	4.6693
0.145287	0.246094	0.258079	0.348029	0.492188	0.550282	0.696058	0.823849	1.01467	1.23047	1.4498	1.80162	2.36028	3.15154	4.6693
0.145341	0.246094	0.258482	0.348029	0.492188	0.550282	0.696058	0.825748	1.01641	1.23047	1.4594	1.80205	2.36286	3.15154	4.6693
0.14548	0.246094	0.258711	0.348029	0.492188	0.550282	0.696058	0.826393	1.01688	1.23047	1.46262	1.80416	2.36475	3.15154	4.6693
0.145481	0.246094	0.258733	0.348029	0.492188	0.550282	0.696058	0.826515	1.01937	1.23047	1.46461	1.8043	2.36568	3.15154	4.6693
0.145489	0.246094	0.25883	0.348029	0.492188	0.550282	0.697187	0.826589	1.01989	1.23047	1.46891	1.81346	2.36622	3.15154	4.6693
0.145545	0.246094	0.258998	0.348029	0.492188	0.550282	0.69728	0.827718	1.02072	1.23047	1.46903	1.814	2.37009	3.15154	4.69036
0.145577	0.246094	0.259699	0.348029	0.492188	0.550282	0.698385	0.829473	1.02295	1.23047	1.46935	1.81809	2.37105	3.1553	4.73371
0.145622	0.246094	0.259726	0.348029	0.492188	0.550282	0.701748	0.831089	1.02349	1.23047	1.46956	1.82061	2.37113	3.15569	4.73371
0.145643	0.246094	0.260163	0.348029	0.492188	0.550282	0.702091	0.833655	1.02415	1.23047	1.46977	1.82081	2.37238	3.15954	4.73886
0.145882	0.246094	0.26023	0.348029	0.492188	0.550282	0.704935	0.833732	1.02537	1.23047	1.46989	1.82116	2.37897	3.16159	4.77828
0.14621	0.246094	0.260752	0.348029	0.492188	0.550282	0.705174	0.834071	1.02942	1.23047	1.47149	1.82356	2.38398	3.16274	4.77828
0.14623	0.246094	0.260816	0.348029	0.492188	0.550282	0.705948	0.840019	1.02964	1.23047	1.47192	1.82671	2.38498	3.16529	4.77828
0.146297	0.246094	0.26089	0.348029	0.492188	0.550282	0.707695	0.841623	1.032	1.23047	1.47203	1.82844	2.39108	3.16685	4.80129
0.146326	0.246094	0.260892	0.348029	0.492188	0.550282	0.712959	0.846562	1.03243	1.23047	1.47247	1.82862	2.39274	3.16874	4.83498
0.146364	0.246094	0.261365	0.348029	0.492188	0.550282	0.713326	0.848439	1.03293	1.23047	1.47266	1.82983	2.39405	3.16913	4.83498
0.146467	0.246094	0.261393	0.348029	0.492188	0.550282	0.715313	0.85242	1.03443	1.23047	1.47576	1.83061	2.39672	3.17547	4.84748
0.146515	0.246094	0.26144	0.348029	0.492188	0.550282	0.716005	0.853608	1.03646	1.23047	1.47621	1.83387	2.40208	3.17577	4.85373
0.146657	0.246094	0.26165	0.348029	0.492188	0.550282	0.716096	0.854574	1.03886	1.23047	1.47656	1.83555	2.40409	3.18376	4.86151
0.146728	0.246094	0.262203	0.349221	0.492188	0.550282	0.717135	0.856606	1.04219	1.23047	1.47656	1.83598	2.411	3.18571	4.90467
0.146851	0.246094	0.262649	0.349336	0.492188	0.550282	0.719993	0.856963	1.04374	1.23047	1.47656	1.83638	2.41236	3.19319	4.91167
0.146993	0.246094	0.262664	0.349351	0.492188	0.550282	0.720616	0.857503	1.04409	1.23047	1.47656	1.83726	2.41283	3.19922	4.95254
0.147146	0.246094	0.262691	0.349495	0.492188	0.550282	0.721376	0.857511	1.04409	1.23047	1.47656	1.84084	2.41951	3.19922	5.00142
0.14715	0.246094	0.262779	0.349646	0.492188	0.550282	0.72449	0.86003	1.04409	1.23047	1.47656	1.84784	2.42005	3.19922	5.06738
0.147259	0.246094	0.262951	0.349811	0.492188	0.550282	0.7248	0.8601	1.04409	1.23047	1.47656	1.84846	2.42284	3.19922	5.07335
0.147297	0.246094	0.26305	0.349887	0.492188	0.550282	0.725552	0.863631	1.04409	1.23047	1.47656	1.84859	2.42343	3.19922	5.07335
0.147325	0.246094	0.263514	0.350543	0.492188	0.550282	0.727311	0.865181	1.04409	1.23047	1.47656	1.84922	2.42374	3.19922	5.08873
0.147565	0.246094	0.264162	0.350691	0.492188	0.550282	0.727459	0.866742	1.04409	1.23047	1.47656	1.8512	2.42374	3.19922	5.12088
0.14764	0.246094	0.264522	0.351406	0.492188	0.550282	0.728271	0.867966	1.04409	1.23047	1.47656	1.85134	2.42374	3.19922	5.12088
0.147651	0.246094	0.264874	0.352166	0.492188	0.550282	0.733297	0.869199	1.04409	1.23153	1.47656	1.85234	2.42374	3.19922	5.21463
0.147669	0.246094	0.265101	0.352397	0.492188	0.550282	0.735978	0.869246	1.04409	1.23433	1.47656	1.86014	2.42374	3.19922	5.23386
0.147903	0.246094	0.265942	0.352487	0.492188	0.550282	0.736459	0.875478	1.04409	1.23565	1.47656	1.86093	2.42374	3.19922	5.26664
0.148253	0.246094	0.266236	0.352497	0.492188	0.550282	0.738281	0.876955	1.04409	1.23895	1.47656	1.86419	2.42374	3.19922	5.29007
0.148261	0.246094	0.266663	0.35257	0.492188	0.550282	0.738281	0.878318	1.04409	1.24267	1.47656	1.86604	2.42538	3.19922	5.34965
0.148382	0.246094	0.267314	0.352712	0.492188	0.550282	0.738281	0.881463	1.04409	1.24339	1.47656	1.86719	2.42623	3.19922	5.39668
0.148442	0.246094	0.267659	0.353334	0.492188	0.550282	0.738281	0.883484	1.04409	1.24525	1.47656	1.86863	2.42736	3.19922	5.41026
0.148457	0.246094	0.267674	0.354031	0.492188	0.550282	0.738281	0.883873	1.04409	1.24573	1.47656	1.86989	2.4294	3.19922	5.42744
0.148552	0.246094	0.267891	0.354725	0.492188	0.550282	0.738281	0.887304	1.04409	1.24626	1.47656	1.87115	2.43182	3.20045	5.43346
0.148732	0.246094	0.268111	0.355051	0.492188	0.550282	0.738281	0.887304	1.04409	1.24932	1.47656	1.87259	2.43601	3.203	5.4703
0.148825	0.246094	0.268703	0.35565	0.492188	0.550282	0.738281	0.887304	1.04409	1.24946	1.47656	1.87419	2.44083	3.20867	5.49722
0.148874	0.246094	0.268811	0.356189	0.492188	0.550282	0.738281	0.887304	1.04409	1.24957	1.47656	1.87419	2.44252	3.20867	5.55213
0.148877	0.246094	0.268953	0.356299	0.492188	0.550282	0.738281	0.887304	1.04409	1.25018	1.47725	1.87419	2.44476	3.20867	5.6118
0.148913	0.246094	0.268956	0.356528	0.492188	0.550282	0.738281	0.887304	1.04409	1.2523	1.47793	1.87419	2.44477	3.20867	5.86531
0.149281	0.246094	0.269055	0.356823	0.492188	0.550282	0.738281	0.887304	1.04487	1.25255	1.47862	1.87419	2.44944	3.20867	5.9573
0.14942	0.246094	0.269102	0.356861	0.492188	0.550282	0.738281	0.887304	1.04505	1.25268	1.48001	1.87419	2.45169	3.20867	5.97502
0.149465	0.246094	0.269532	0.357135	0.492188	0.550282	0.738281	0.887304	1.04655	1.25274	1.48066	1.87419	2.45659	3.20867	6.00791
0.149599	0.246094	0.269798	0.357316	0.492188	0.550282	0.738281	0.887304	1.04759	1.25301	1.48184	1.87419	2.46094	3.20867	6.00791
0.149752	0.246094	0.269913	0.357462	0.492188	0.550282	0.738281	0.887304	1.05024	1.25345	1.48247	1.87419	2.46094	3.21352	6.15234
0.149814	0.246094	0.269984	0.358094	0.492188	0.550282	0.738281	0.887304	1.05164	1.2544	1.48705	1.87464	2.46094	3.21658	6.15234
0.150013	0.246094	0.270165	0.358793	0.492188	0.550282	0.738281	0.887304	1.0525	1.25466	1.49064	1.87646	2.46094	3.21758	6.39098
0.150047	0.246094	0.271107	0.359028	0.492188	0.550282	0.738281	0.887304	1.05266	1.25475	1.49491	1.87651	2.46094	3.22877	6.42446
0.15011	0.246094	0.271177	0.359712	0.492188	0.550282	0.738281	0.887304	1.054	1.25484	1.49508	1.87743	2.46094	3.23686	6.43761
0.150255	0.246094	0.27131	0.360067	0.492188	0.550282	0.738281	0.887304	1.05582	1.25484	1.49543	1.87843	2.46094	3.23686	6.5846
0.150283	0.246094	0.271491	0.360141	0.492188	0.550282	0.738281	0.887304	1.05584	1.25484	1.49693	1.88008	2.46094	3.23686	6.62628
0.150317	0.246094	0.271651	0.360637	0.492188	0.550282	0.738281	0.887304	1.05584	1.25484	1.49693	1.88287	2.46094	3.23844	6.70087
0.150436	0.246094	0.271698	0.361116	0.492188	0.550282	0.738281	0.887304	1.06052	1.25484	1.49693	1.88598	2.46094	3.23905	6.71759
0.150494	0.246094	0.271754	0.363802	0.492188	0.550282	0.738281	0.887304	1.06137	1.25484	1.49693	1.88926	2.46094	3.2509	6.72134
0.150576	0.246094	0.272027	0.363837	0.492188	0.550282	0.738281	0.887304	1.06249	1.25484	1.49693	1.89435	2.46094	3.27616	6.74972
0.150693	0.246094	0.272085	0.364512	0.492188	0.550282	0.738281	0.887304	1.06366	1.25484	1.49693	1.89464	2.46127	3.2833	6.77743
0.150828	0.246094	0.272636	0.364973	0.492188	0.550282	0.738281	0.887304	1.06367	1.25484	1.49693	1.89794	2.46153	3.2833	6.7813
0.15113	0.246094	0.272826	0.365268	0.492188	0.550282	0.738281	0.887304	1.06416	1.25484	1.49693	1.90064	2.46192	3.2833	6.97915
0.151282	0.246094	0.27303	0.365899	0.492188	0.550282	0.738281	0.887304	1.06435	1.25484	1.49693	1.90414	2.46199	3.2833	7.16636
0.151428	0.246094	0.27346	0.366069	0.492188	0.550282	0.738281	0.887304	1.0653	1.25484	1.49693	1.90794	2.46581	3.28341	7.4725
0.151497	0.246094	0.273571	0.367525	0.492188	0.550282	0.738281	0.887304	1.06896	1.25484	1.49693	1.90828	2.46594	3.28481	7.59709
0.151593	0.246094	0.273614	0.367678	0.492188	0.550282	0.738281	0.887304	1.07008	1.25484	1.49693	1.90968	2.46752	3.29641	7.70788
0.15187	0.246094	0.273623	0.368404	0.492188	0.550282	0.738281	0.887304	1.07061	1.25484	1.49693	1.91521	2.47321	3.29802	7.81711
0.152445	0.246094	0.274123	0.369244	0.492188	0.550282	0.738281	0.887304	1.07089	1.25484	1.49798	1.91552	2.47321	3.30169	7.81711
0.152562	0.246094	0.274531	0.369608	0.492188	0.550282	0.738281	0.887304	1.07225	1.25484	1.49981	1.91741	2.47321	3.30169	7.94391
0.152604	0.246094	0.27543	0.36966	0.492188	0.550282	0.738281	0.887304	1.07236	1.25484	1.50049	1.92055	2.47321	3.30169	7.94391
0.15275	0.246094	0.27562	0.369959	0.492188	0.550282	0.738281	0.887304	1.07424	1.25484	1.50224	1.92134	2.47602	3.30904	8.01601
0.15287	0.246094	0.275655	0.370104	0.492188	0.550282	0.738281	0.887304	1.07525	1.25484	1.50337	1.92134	2.47644	3.31085	8.03488
0.152941	0.246094	0.275774	0.370311	0.492188	0.550282	0.738281	0.887304	1.07682	1.25484	1.50498	1.92205	2.4803	3.31085	8.09495
0.153061	0.246094	0.275811	0.370495	0.492188	0.550282	0.738281	0.887304	1.07699	1.25484	1.50554	1.92205	2.48108	3.31085	8.14715
0.15339	0.246094	0.276429	0.370515	0.492188	0.550282	0.738281	0.887304	1.079	1.25484	1.50627	1.92205	2.48308	3.31085	8.18054
0.153667	0.246094	0.276563	0.370798	0.492188	0.550282	0.738281	0.887304	1.07953	1.25484	1.50779	1.92205	2.4834	3.31085	9.69497
0.153742	0.246094	0.277711	0.370953	0.492188	0.550282	0.738281	0.887304	1.07956	1.25484	1.51184	1.92205	2.48527	3.31085	11.0194
0.153769	0.246094	0.277785	0.371069	0.492188	0.550282	0.738281	0.887304	1.08479	1.25484	1.51282	1.92205	2.48574	3.31085	11.3444
0.153935	0.246094	0.277929	0.372029	0.492188	0.550282	0.738281	0.887304	1.08627	1.25484	1.51325	1.92205	2.48692	3.31085	11.4506
0.153957	0.246094	0.279192	0.372359	0.492188	0.550282	0.738281	0.887304	1.08632	1.25484	1.51412	1.92205	2.48797	3.31562	11.5559
0.154209	0.246094	0.279247	0.372487	0.492188	0.550282	0.738281	0.887304	1.08774	1.25484	1.5143	1.92205	2.49092	3.32181	11.569
0.15444	0.246094	0.279487	0.372731	0.492188	0.550282	0.738281	0.892969	1.09092	1.25484	1.51438	1.92205	2.49272	3.32928	11.6914
0.154695	0.246094	0.279657	0.37296	0.492188	0.550282	0.738281	0.893067	1.0917	1.25484	1.5157	1.92205	2.49446	3.33056	11.7405
0.154876	0.246094	0.280344	0.373159	0.492188	0.550282	0.738281	0.895022	1.09538	1.25484	1.51682	1.92205	2.4953	3.33166	11.7945
0.155007	0.246094	0.280777	0.3734	0.492188	0.550282	0.738281	0.900568	1.0955	1.25484	1.51905	1.92205	2.49668	3.33733	12.0209
0.155117	0.246094	0.280781	0.373708	0.492188	0.550282	0.738281	0.902059	1.0999	1.25484	1.52121	1.92205	2.50148	3.34435	12.2183
0.15528	0.246094	0.280946	0.374111	0.492188	0.550282	0.738281	0.904426	1.10025	1.25484	1.5226	1.92205	2.50224	3.34724	12.344
0.155411	0.246094	0.281006	0.374265	0.492188	0.550282	0.738281	0.905143	1.10056	1.25484	1.52644	1.92205	2.50288	3.34724	12.344
0.155475	0.246094	0.281419	0.374295	0.492188	0.550282	0.738281	0.908646	1.10056	1.25484	1.53024	1.92205	2.50867	3.34724
0.155585	0.246094	0.281552	0.374435	0.492188	0.550282	0.738281	0.9107	1.10056	1.25484	1.53068	1.92205	2.50967	3.34724
0.155851	0.246094	0.281774	0.374742	0.492188	0.550282	0.738281	0.91075	1.10056	1.25484	1.53113	1.92205	2.50967	3.34724
0.155866	0.246094	0.282438	0.374847	0.492188	0.550282	0.738281	0.911491	1.10056	1.25484	1.53312	1.92205	2.50967	3.34724
0.156074	0.246094	0.282647	0.37552	0.492188	0.550282	0.738281	0.913624	1.10056	1.25484	1.53386	1.92205	2.50967	3.34724
0.156201	0.246094	0.282854	0.376181	0.492188	0.550282	0.738281	0.914642	1.10056	1.25484	1.53402	1.92205	2.51106	3.34724
0.156205	0.246094	0.283196	0.377287	0.492188	0.550282	0.738281	0.916995	1.10056	1.25484	1.53474	1.92655	2.51766	3.35838
0.156421	0.246094	0.283452	0.377938	0.492188	0.550282	0.738281	0.91954	1.10056	1.25484	1.54026	1.92667	2.51832	3.37932
0.156593	0.246094	0.28351	0.378387	0.492188	0.550282	0.738281	0.919847	1.10056	1.25484	1.54248	1.93119	2.51952	3.39924
0.156712	0.246094	0.283572	0.380797	0.492188	0.550282	0.738281	0.923572	1.10056	1.25484	1.54413	1.93437	2.52028	3.39928
0.156798	0.246094	0.284028	0.381015	0.492188	0.550282	0.738281	0.930265	1.10056	1.25484	1.54577	1.93561	2.52064	3.40317
0.157331	0.246094	0.284623	0.381436	0.492188	0.550282	0.738281	0.932283	1.10056	1.25484	1.54816	1.93691	2.52138	3.40684
0.157486	0.246094	0.284812	0.381793	0.492188	0.550289	0.738281	0.932372	1.10056	1.25484	1.54858	1.94079	2.52398	3.41884
0.157748	0.246094	0.286393	0.382501	0.492188	0.550364	0.738281	0.933534	1.10056	1.25999	1.54877	1.94113	2.52452	3.41884
0.157792	0.246094	0.286566	0.383044	0.492188	0.550465	0.738281	0.933944	1.10056	1.26422	1.55034	1.94148	2.52835	3.41884
0.157852	0.246094	0.286831	0.383081	0.492188	0.550692	0.738281	0.934939	1.10056	1.26646	1.55239	1.94168	2.52949	3.42769
0.157867	0.246094	0.286973	0.383104	0.492188	0.551666	0.738281	0.935538	1.10056	1.26682	1.5539	1.94266	2.52986	3.42769
0.157886	0.246094	0.287101	0.383675	0.492188	0.552784	0.738281	0.940126	1.10056	1.26689	1.55562	1.94435	2.52994	3.42769
0.157909	0.246094	0.287373	0.384314	0.492188	0.552943	0.738281	0.946804	1.10056	1.26776	1.55643	1.94556	2.53	3.42769
0.157997	0.246094	0.287472	0.38434	0.492188	0.55416	0.738281	0.950429	1.10056	1.27435	1.55643	1.94789	2.53231	3.42769
0.158014	0.246094	0.288406	0.384598	0.492188	0.55458	0.738281	0.952895	1.10056	1.27865	1.55643	1.94848	2.53369	3.42769
0.15812	0.246094	0.288478	0.385509	0.492188	0.554736	0.738281	0.953161	1.10056	1.28129	1.55643	1.94874	2.53369	3.42769
0.158204	0.246094	0.288516	0.385967	0.492188	0.556432	0.738281	0.955811	1.10056	1.282	1.55643	1.95252	2.53369	3.42769
0.158394	0.246094	0.288604	0.387345	0.492188	0.558953	0.738281	0.956484	1.10056	1.28224	1.55643	1.9567	2.53369	3.43319
0.158441	0.246094	0.290055	0.3876	0.492188	0.561481	0.738281	0.956531	1.10056	1.28292	1.55643	1.95739	2.53369	3.43627
0.158442	0.246094	0.290502	0.387966	0.492188	0.561683	0.738281	0.957831	1.10056	1.28346	1.55643	1.95889	2.53369	3.4367
0.158463	0.246094	0.290585	0.388137	0.492188	0.562177	0.738281	0.958312	1.10056	1.28431	1.55643	1.96047	2.53369	3.43901
0.158488	0.246094	0.290622	0.388164	0.492188	0.56328	0.738281	0.962043	1.10056	1.28446	1.55643	1.96096	2.53369	3.44511
0.158528	0.246094	0.290766	0.388323	0.492188	0.564246	0.738281	0.962812	1.102	1.28602	1.55643	1.96266	2.53369	3.44531
0.158535	0.246094	0.290906	0.388472	0.492188	0.565404	0.738281	0.96301	1.10319	1.28751	1.55643	1.96387	2.53369	3.44531
0.158539	0.246094	0.290923	0.389009	0.492188	0.566589	0.738281	0.964146	1.10473	1.2878	1.55643	1.96875	2.53369	3.45436
0.158582	0.246094	0.291256	0.389339	0.492188	0.569006	0.738281	0.964305	1.10519	1.28901	1.55684	1.96875	2.53942	3.46384
0.158582	0.246094	0.291317	0.389378	0.492188	0.569064	0.738281	0.964368	1.10575	1.29111	1.55824	1.96875	2.54495	3.4653
0.15866	0.246094	0.291369	0.389424	0.492188	0.569929	0.738281	0.965069	1.10671	1.29114	1.55893	1.96875	2.54823	3.46571
0.158677	0.246094	0.291439	0.389691	0.492188	0.570582	0.738307	0.967688	1.10691	1.29224	1.55939	1.96875	2.55241	3.4717
0.158731	0.246094	0.291658	0.389712	0.492188	0.57158	0.739202	0.967719	1.10721	1.29296	1.56154	1.96875	2.55434	3.47763
0.158789	0.246094	0.291687	0.391257	0.492188	0.572574	0.740797	0.968314	1.10773	1.293	1.56436	1.96875	2.55448	3.48029
0.158873	0.246094	0.291729	0.391546	0.492188	0.574306	0.741182	0.968464	1.11007	1.29384	1.56556	1.96875	2.55665	3.48029
0.159028	0.246094	0.291847	0.391751	0.492188	0.57447	0.745471	0.968601	1.11357	1.29407	1.56632	1.96916	2.56222	3.48029
0.159114	0.246094	0.291858	0.392062	0.492188	0.575241	0.747759	0.970578	1.11451	1.29539	1.56762	1.97135	2.56929	3.48029
0.159221	0.246094	0.292181	0.392148	0.492188	0.575787	0.749145	0.971805	1.11932	1.29599	1.56818	1.97486	2.56929	3.48029
0.159244	0.246094	0.292509	0.392367	0.492188	0.576062	0.750726	0.973018	1.11986	1.29689	1.56895	1.97539	2.56929	3.48029
0.159346	0.246094	0.292546	0.392647	0.492188	0.578429	0.751372	0.974962	1.12037	1.2976	1.56913	1.97547	2.56929	3.48029
0.159479	0.246094	0.292766	0.393408	0.492188	0.579708	0.751447	0.974971	1.12135	1.29994	1.57091	1.9781	2.56929	3.48029
0.159618	0.246094	0.293855	0.394638	0.492188	0.579714	0.757104	0.975972	1.12229	1.30024	1.57103	1.97878	2.56929	3.48029
0.159627	0.246094	0.294005	0.395264	0.492188	0.57986	0.757492	0.976234	1.12231	1.30217	1.5717	1.97991	2.56929	3.48029
0.159636	0.246094	0.294333	0.395799	0.492188	0.580154	0.757747	0.97655	1.12449	1.30436	1.57183	1.98265	2.56929	3.49493
0.15969	0.246094	0.294625	0.395913	0.492188	0.580186	0.758328	0.9787	1.12608	1.30538	1.57507	1.98407	2.56929	3.4951
0.15974	0.246094	0.295349	0.396278	0.492188	0.580601	0.759115	0.98042	1.12775	1.30655	1.57577	1.98407	2.56971	3.49765
0.159948	0.246094	0.295574	0.397082	0.492188	0.581097	0.761206	0.982011	1.13118	1.30843	1.57577	1.98407	2.56989	3.49765
0.160044	0.246094	0.295888	0.397135	0.492188	0.58277	0.761325	0.984375	1.13608	1.30905	1.57577	1.98407	2.57875	3.49765
0.160081	0.246094	0.296117	0.39735	0.492188	0.586177	0.762815	0.984375	1.13757	1.31002	1.57577	1.98407	2.58036	3.49765
0.160202	0.246094	0.296373	0.397578	0.492188	0.588708	0.767464	0.984375	1.1389	1.31567	1.57577	1.98407	2.58136	3.49765
0.160262	0.246094	0.296678	0.397759	0.492188	0.591776	0.769275	0.984375	1.13984	1.31605	1.57577	1.98407	2.58986	3.49765
0.160486	0.246094	0.297044	0.397973	0.492188	0.59222	0.770003	0.984375	1.14065	1.3163	1.57577	1.98407	2.59319	3.4996
0.160543	0.246094	0.297483	0.398484	0.492188	0.593841	0.77406	0.984375	1.14086	1.31676	1.57577	1.98407	2.59444	3.51951
0.160655	0.246094	0.297551	0.398954	0.492188	0.595811	0.774188	0.984375	1.14231	1.31773	1.57577	1.98407	2.59466	3.52174
0.160706	0.246094	0.297931	0.399807	0.492188	0.596006	0.775853	0.984375	1.1424	1.32047	1.57577	1.98407	2.59543	3.52353
0.161144	0.246094	0.298205	0.39989	0.492188	0.597774	0.775878	0.984375	1.14439	1.32073	1.57577	1.98407	2.59564	3.52353
0.161155	0.246094	0.298374	0.400645	0.492188	0.599455	0.776505	0.984375	1.14503	1.32106	1.57577	1.98407	2.59606	3.52353
0.161255	0.246094	0.298544	0.401147	0.492188	0.60255	0.778217	0.984375	1.14574	1.32161	1.57577	1.98407	2.59647	3.52353
0.161368	0.246094	0.299044	0.401376	0.492188	0.602765	0.778217	0.984375	1.1459	1.3226	1.57577	1.98553	2.60234	3.52353
0.161573	0.246094	0.299292	0.402846	0.492188	0.60507	0.778217	0.984375	1.14681	1.32343	1.57577	1.98907	2.60738	3.52353
0.161654	0.246094	0.299672	0.403169	0.492188	0.605761	0.778217	0.984375	1.14774	1.32414	1.57577	1.9894	2.60993	3.52353
0.161706	0.246094	0.299693	0.403844	0.492188	0.607556	0.778217	0.984375	1.14905	1.32431	1.57577	1.98943	2.61093	3.52612
0.161753	0.246094	0.300749	0.405055	0.492188	0.608215	0.778217	0.984375	1.15603	1.32487	1.57577	1.98993	2.61601	3.52925
0.161872	0.246094	0.300984	0.405456	0.492188	0.608982	0.778217	0.984375	1.15659	1.32526	1.57577	1.99799	2.61601	3.53756
0.161966	0.246094	0.301203	0.405574	0.492188	0.6096	0.778217	0.984375	1.15761	1.32526	1.57577	2.00047	2.61601	3.53908
0.161977	0.246094	0.301428	0.406113	0.492188	0.610107	0.778217	0.984375	1.15855	1.32526	1.57577	2.00112	2.61601	3.54287
0.162028	0.246094	0.301524	0.40712	0.492188	0.610245	0.778217	0.984375	1.15905	1.32526	1.57577	2.00127	2.61601	3.54356
0.162662	0.246094	0.30178	0.407954	0.492188	0.61085	0.778217	0.984375	1.16014	1.32526	1.57577	2.00131	2.61601	3.54921
0.162746	0.246094	0.301905	0.408087	0.492188	0.610987	0.778217	0.984375	1.1635	1.32526	1.57577	2.00255	2.61713	3.54921
0.162782	0.246094	0.302463	0.408156	0.492188	0.611395	0.778217	0.984375	1.16366	1.32526	1.57577	2.00284	2.61823	3.54921
0.162787	0.246094	0.302797	0.408227	0.492188	0.611627	0.778217	0.984375	1.16739	1.32526	1.57577	2.00306	2.61877	3.54921
0.162814	0.246094	0.303432	0.410232	0.492188	0.611832	0.778217	0.984375	1.16836	1.32526	1.57577	2.00514	2.62344	3.55221
0.162823	0.246094	0.303528	0.410505	0.492188	0.612159	0.778217	0.984375	1.16869	1.32526	1.57577	2.00759	2.62965	3.58318
0.163014	0.246094	0.304261	0.410875	0.492188	0.612988	0.778217	0.984375	1.16996	1.32526	1.57577	2.00859	2.631	3.58318
0.163209	0.246094	0.304353	0.411965	0.492188	0.61401	0.778217	0.984375	1.17018	1.32526	1.57577	2.0086	2.63677	3.58318
0.163414	0.246094	0.304373	0.41198	0.492188	0.614012	0.778217	0.984375	1.17101	1.32526	1.57577	2.00991	2.63692	3.58474
0.163418	0.246094	0.304413	0.411993	0.492188	0.614292	0.778217	0.984375	1.17416	1.32526	1.57577	2.01234	2.63921	3.58552
0.163418	0.246094	0.304803	0.412665	0.492292	0.615613	0.778217	0.984375	1.17572	1.32526	1.57577	2.013	2.64821	3.58983
0.163686	0.246094	0.304818	0.4127	0.494209	0.61798	0.778217	0.984375	1.17577	1.32526	1.57577	2.01559	2.64866	3.59756
0.16376	0.246094	0.304843	0.412855	0.494665	0.618667	0.778217	0.984375	1.17721	1.32526	1.57577	2.01888	2.65051	3.59959
0.163785	0.246094	0.305043	0.413481	0.495318	0.619819	0.778217	0.984375	1.17728	1.32526	1.57577	2.02009	2.65051	3.63324
0.164186	0.246094	0.305113	0.41357	0.496027	0.620739	0.778217	0.984375	1.17952	1.32526	1.57577	2.02203	2.65051	3.63353
0.164493	0.246094	0.305549	0.414016	0.496448	0.620857	0.778217	0.984375	1.18049	1.32526	1.57577	2.02581	2.65051	3.63353
0.164578	0.246094	0.305567	0.414703	0.497647	0.620942	0.778217	0.984375	1.184	1.32526	1.57577	2.02904	2.65051	3.63353
0.164756	0.246094	0.305874	0.415716	0.497856	0.621916	0.778217	0.984375	1.18481	1.32526	1.57577	2.02912	2.65051	3.64248
0.16508	0.246094	0.306248	0.416408	0.498338	0.622618	0.778217	0.984375	1.18595	1.32526	1.57577	2.02934	2.65051	3.64718
0.16525	0.246094	0.306315	0.416619	0.498486	0.624066	0.778217	0.984375	1.18602	1.32526	1.57676	2.02934	2.65051	3.65845
0.165265	0.246094	0.306695	0.417646	0.498545	0.625995	0.778217	0.984375	1.18711	1.32526	1.57679	2.02934	2.65051	3.65845
0.165278	0.246094	0.306718	0.417712	0.498827	0.626413	0.778217	0.984375	1.18968	1.32526	1.57854	2.02934	2.65051	3.65845
0.165497	0.246094	0.306806	0.418556	0.499323	0.629319	0.778217	0.984375	1.19023	1.32526	1.57984	2.02934	2.65051	3.65845
0.165561	0.246094	0.307053	0.419144	0.499647	0.634249	0.778217	0.984375	1.19203	1.32526	1.58034	2.02934	2.65059	3.65845
0.16586	0.246094	0.307103	0.419606	0.500583	0.635159	0.778217	0.984375	1.19458	1.32526	1.58095	2.02934	2.65213	3.65845
0.165917	0.246094	0.307365	0.419715	0.501421	0.635983	0.778217	0.984375	1.19541	1.32526	1.58233	2.02934	2.65565	3.65845
0.166012	0.246094	0.307534	0.419946	0.501452	0.636277	0.778217	0.984375	1.19717	1.32526	1.58487	2.03438	2.66	3.65845
0.166345	0.246094	0.30772	0.420285	0.502382	0.637173	0.778217	0.984375	1.19851	1.32526	1.58666	2.03496	2.66003	3.65845
0.16646	0.246094	0.307841	0.420444	0.503286	0.637435	0.778217	0.984375	1.19884	1.32526	1.58793	2.03556	2.66191	3.65845
0.166514	0.246094	0.307943	0.420466	0.503585	0.639117	0.778217	0.984375	1.20016	1.32526	1.58832	2.03708	2.66191	3.65845
0.166635	0.246094	0.308806	0.420652	0.504427	0.639539	0.778217	0.984375	1.20021	1.32526	1.59056	2.03831	2.66191	3.65845
0.166649	0.246094	0.308831	0.420814	0.504475	0.639544	0.778217	0.984375	1.20022	1.32526	1.59293	2.03931	2.66191	3.65845
0.166652	0.246094	0.3091	0.420875	0.505252	0.640966	0.778217	0.984375	1.20304	1.32526	1.59442	2.04018	2.66191	3.65886
0.166925	0.246094	0.30962	0.421342	0.505837	0.6413	0.778217	0.984375	1.20524	1.32526	1.59524	2.04117	2.66191	3.66826
0.166943	0.246094	0.309821	0.421535	0.506295	0.642465	0.778217	0.984375	1.20622	1.32526	1.59531	2.04157	2.66191	3.67563
0.167002	0.246094	0.310832	0.422176	0.506306	0.644466	0.778217	0.984375	1.20708	1.32526	1.59951	2.04176	2.66191	3.68092
0.167133	0.246094	0.313248	0.423327	0.507135	0.644636	0.778217	0.984375	1.20722	1.32526	1.59987	2.04377	2.66354	3.69141
0.167202	0.246094	0.313528	0.425124	0.507169	0.644943	0.778217	0.984375	1.20795	1.32526	1.60003	2.04405	2.66703	3.69141
0.167278	0.246094	0.314699	0.425743	0.507442	0.646988	0.778217	0.984375	1.20839	1.32526	1.60019	2.04875	2.66852	3.69141
0.16744	0.246094	0.315487	0.425849	0.507734	0.647854	0.778217	0.984375	1.20852	1.32526	1.60226	2.04973	2.66931	3.72392
0.167597	0.246094	0.315527	0.426024	0.509698	0.648291	0.778217	0.984375	1.20963	1.32526	1.60256	2.04991	2.67677	3.72407
0.167729	0.246094	0.316164	0.426397	0.5099	0.648501	0.778217	0.984375	1.20972	1.32526	1.60501	2.0546	2.69122	3.72407
0.167824	0.246094	0.316165	0.426455	0.510241	0.648543	0.778217	0.985648	1.21075	1.32662	1.60521	2.05759	2.69536	3.72407
0.167847	0.246094	0.316983	0.426798	0.511257	0.652931	0.778217	0.986264	1.21077	1.32679	1.60542	2.05878	2.69677	3.72407
0.167912	0.246094	0.317208	0.427371	0.511722	0.653142	0.778217	0.98789	1.21177	1.3288	1.60929	2.06259	2.69717	3.74839
0.16793	0.246094	0.317311	0.427726	0.512885	0.653406	0.778217	0.990817	1.21211	1.3294	1.60939	2.06434	2.69991	3.74839
0.168076	0.246094	0.317793	0.428763	0.513055	0.654647	0.778217	0.99114	1.21402	1.33081	1.61249	2.06578	2.70635	3.74839
0.168212	0.246094	0.317852	0.428968	0.513361	0.655448	0.778217	0.99179	1.21436	1.33163	1.61609	2.06657	2.70703	3.74839
0.168245	0.246094	0.318102	0.428992	0.516605	0.65711	0.778217	0.993476	1.21992	1.33517	1.6169	2.06886	2.70703	3.74839
0.168274	0.246094	0.318277	0.429222	0.517206	0.65941	0.778217	1.00038	1.22001	1.33588	1.6175	2.07343	2.70789	3.74916
0.168404	0.246094	0.318332	0.429591	0.517514	0.66082	0.778217	1.00126	1.22076	1.33857	1.62116	2.07418	2.71237	3.75646
0.168526	0.246094	0.318594	0.430542	0.518448	0.661289	0.778217	1.0052	1.22117	1.33942	1.62254	2.07421	2.71752	3.75646
0.168546	0.246094	0.318893	0.43068	0.518625	0.66445	0.778217	1.0078	1.22359	1.34244	1.62304	2.07452	2.71819	3.75646
0.168607	0.246094	0.319067	0.431095	0.518863	0.664939	0.778217	1.008	1.22661	1.34291	1.62333	2.07541	2.71819	3.76451
0.168615	0.246094	0.319159	0.43194	0.518917	0.665255	0.778217	1.00918	1.22713	1.34322	1.62433	2.07748	2.71819	3.76451
0.168629	0.246094	0.319384	0.432323	0.520743	0.666368	0.778217	1.01062	1.22765	1.34595	1.62452	2.07901	2.71819	3.76451
0.168651	0.246094	0.319818	0.432484	0.520954	0.666706	0.778217	1.01332	1.22773	1.34835	1.62706	2.08741	2.71956	3.76451
0.168895	0.246094	0.321059	0.432499	0.52438	0.669196	0.778217	1.01467	1.2282	1.34878	1.62732	2.08817	2.72384	3.76451
0.16893	0.246094	0.321396	0.432568	0.524864	0.669674	0.778217	1.01467	1.22866	1.34951	1.62806	2.08817	2.73151	3.77607
0.168956	0.246094	0.321774	0.432625	0.527362	0.670518	0.778217	1.01467	1.22925	1.35358	1.62944	2.08817	2.73386	3.79034
0.168976	0.246094	0.322137	0.432855	0.528659	0.671014	0.778217	1.01467	1.22993	1.35372	1.62966	2.08817	2.73633	3.79446
0.169001	0.246094	0.322217	0.433236	0.529177	0.672223	0.778217	1.01467	1.23047	1.35422	1.63159	2.09446	2.73856	3.79925
0.169029	0.246094	0.322261	0.433451	0.53016	0.673807	0.778217	1.01467	1.23047	1.35509	1.63201	2.09493	2.74128	3.80011
0.169083	0.246094	0.322388	0.433707	0.530528	0.673839	0.778217	1.01467	1.23047	1.35969	1.63272	2.09611	2.74148	3.80313
0.169275	0.246094	0.32309	0.435191	0.531163	0.678536	0.778217	1.01467	1.23047	1.3617	1.6333	2.10052	2.74566	3.80895
0.169291	0.246094	0.323159	0.436884	0.531362	0.679017	0.778217	1.01467	1.23047	1.3662	1.63453	2.10249	2.7471	3.81943
0.169291	0.246094	0.323434	0.437573	0.532528	0.679389	0.778217	1.01467	1.23047	1.36998	1.63479	2.10263	2.7501	3.8204
0.16947	0.246094	0.323979	0.438067	0.532924	0.679725	0.778217	1.01467	1.23047	1.37176	1.635	2.10263	2.75141	3.8204
0.169502	0.246094	0.324036	0.438238	0.536776	0.680123	0.778217	1.01467	1.23047	1.37228	1.63625	2.10263	2.75141	3.8204
0.16972	0.246094	0.324196	0.438349	0.537458	0.681277	0.778217	1.01467	1.23047	1.37329	1.63728	2.10263	2.75141	3.8204
0.170081	0.246094	0.324363	0.43879	0.538187	0.683838	0.778217	1.01467	1.23047	1.37519	1.63776	2.10263	2.75141	3.8204
0.170227	0.246094	0.324768	0.439051	0.53888	0.684139	0.778217	1.01467	1.23047	1.37551	1.64002	2.10263	2.75141	3.8204
0.17023	0.246094	0.325707	0.439524	0.53954	0.685927	0.778217	1.01467	1.23047	1.37582	1.64004	2.10263	2.75141	3.8204
0.170399	0.246094	0.326312	0.439538	0.539872	0.686561	0.778217	1.01467	1.23047	1.37634	1.64439	2.10263	2.75141	3.8204
0.170433	0.246094	0.326494	0.439576	0.540105	0.686618	0.778217	1.01467	1.23047	1.37639	1.64618	2.10263	2.75141	3.84411
0.170547	0.246094	0.3268	0.439631	0.540922	0.689986	0.778217	1.01467	1.23047	1.37706	1.64686	2.10343	2.75141	3.84411
0.170583	0.246094	0.327115	0.43973	0.541858	0.691683	0.778217	1.01467	1.23047	1.37848	1.64954	2.10365	2.75141	3.84411
0.170654	0.246094	0.327494	0.439764	0.542181	0.692264	0.778217	1.01467	1.23047	1.37857	1.65085	2.10764	2.75141	3.84411
0.170714	0.246094	0.327813	0.439767	0.542181	0.69486	0.778217	1.01467	1.23047	1.37956	1.65085	2.11442	2.75141	3.84411
0.17085	0.246094	0.327871	0.440011	0.543814	0.696058	0.778217	1.01467	1.23047	1.37966	1.65085	2.11545	2.75141	3.84411
0.171078	0.246094	0.32813	0.441301	0.543863	0.696058	0.778217	1.01467	1.23047	1.38176	1.65085	2.11639	2.75141	3.8475
0.171107	0.246094	0.328498	0.441948	0.544409	0.696058	0.779121	1.01467	1.23047	1.38453	1.65085	2.11674	2.75141	3.84811
0.17112	0.246094	0.329427	0.442261	0.545218	0.696058	0.779838	1.01467	1.23047	1.38566	1.65085	2.11698	2.75141	3.85198
0.171146	0.246094	0.329953	0.442515	0.545471	0.696058	0.781449	1.01467	1.23047	1.38658	1.65085	2.11698	2.75141	3.85198
0.171233	0.246094	0.330233	0.442616	0.545655	0.696058	0.781996	1.01467	1.23047	1.38734	1.65085	2.11698	2.75141	3.85198
0.171249	0.246094	0.330992	0.443085	0.548761	0.696058	0.782277	1.01467	1.23047	1.38791	1.65085	2.11698	2.75141	3.85676
0.171406	0.246094	0.331446	0.443121	0.548813	0.696058	0.782791	1.01467	1.23047	1.39024	1.65085	2.11698	2.75141	3.86415
0.171606	0.246094	0.331727	0.443287	0.54988	0.696058	0.782971	1.01467	1.23047	1.39039	1.65085	2.11698	2.75141	3.89108
0.171622	0.246094	0.332022	0.443464	0.550282	0.696058	0.783161	1.01467	1.23047	1.3915	1.65085	2.11698	2.75141	3.89108
0.171624	0.246094	0.332518	0.443652	0.550282	0.696058	0.784327	1.01467	1.23047	1.39199	1.65085	2.11698	2.75141	3.89108
0.171682	0.246094	0.332646	0.44451	0.550282	0.696058	0.78818	1.01467	1.23047	1.39212	1.65085	2.11698	2.75141	3.89108
0.171863	0.246094	0.332694	0.44464	0.550282	0.696058	0.78862	1.01467	1.23047	1.39212	1.65085	2.11698	2.75141	3.89108
0.172014	0.246094	0.332786	0.444649	0.550282	0.696058	0.792913	1.01467	1.23047	1.39212	1.65085	2.11698	2.75141	3.89108
0.17212	0.246094	0.33309	0.444691	0.550282	0.696058	0.793717	1.01467	1.23047	1.39212	1.6535	2.11698	2.75141	3.89108
0.172571	0.246094	0.334226	0.44494	0.550282	0.696058	0.79431	1.01467	1.23047	1.39212	1.65521	2.11698	2.75561	3.89108
0.172856	0.246094	0.334368	0.445201	0.550282	0.696058	0.794411	1.01467	1.23047	1.39212	1.65755	2.11698	2.75828	3.89108
0.17296	0.246094	0.335147	0.445204	0.550282	0.696058	0.794734	1.01467	1.23047	1.39212	1.65874	2.11698	2.77108	3.89108
0.173001	0.246094	0.335287	0.445505	0.550282	0.696058	0.797261	1.01467	1.23047	1.39212	1.65896	2.11698	2.77288	3.89108
0.173023	0.246094	0.335552	0.446863	0.550282	0.696058	0.798554	1.01467	1.23047	1.39212	1.65993	2.11698	2.77939	3.89108
0.173064	0.246094	0.336247	0.446884	0.550282	0.696058	0.807919	1.01467	1.23047	1.39212	1.66154	2.11698	2.78423	3.89108
0.173207	0.246094	0.336712	0.446955	0.550282	0.696058	0.811212	1.01467	1.23047	1.39212	1.66325	2.11698	2.78423	3.89108
0.173258	0.246094	0.337281	0.447011	0.550282	0.696058	0.8135	1.01467	1.23047	1.39212	1.66476	2.11698	2.78423	3.89108
0.173313	0.246094	0.337356	0.448121	0.550282	0.696058	0.813666	1.01467	1.23047	1.39212	1.66544	2.11698	2.7845	3.89108
0.173358	0.246094	0.337405	0.448434	0.550282	0.696058	0.814406	1.01467	1.23047	1.39223	1.6656	2.11698	2.79046	3.89108
0.173409	0.246094	0.337425	0.448843	0.550282	0.696058	0.815047	1.01467	1.23047	1.39227	1.66622	2.11859	2.79209	3.89453
0.17367	0.246094	0.338136	0.449966	0.550282	0.696058	0.816391	1.01467	1.23047	1.3923	1.66979	2.12036	2.79251	3.89554
0.173941	0.246094	0.338138	0.450304	0.550282	0.696058	0.820694	1.01467	1.23047	1.39468	1.6716	2.1229	2.79717	3.89788
0.174085	0.246094	0.338308	0.450751	0.550282	0.696058	0.823626	1.01467	1.23047	1.39488	1.67167	2.12318	2.8059	3.90266
0.174126	0.246094	0.338821	0.451166	0.550282	0.696058	0.825931	1.01467	1.23047	1.39595	1.67317	2.12482	2.8059	3.90998
0.174635	0.246094	0.339049	0.451227	0.550282	0.696058	0.827678	1.01467	1.23047	1.39654	1.67325	2.126	2.8059	3.9189
0.174661	0.246094	0.339226	0.451812	0.550282	0.696058	0.827875	1.01532	1.23047	1.4032	1.67529	2.12664	2.8059	3.93392
0.174772	0.246094	0.339505	0.452112	0.550282	0.696058	0.828341	1.01657	1.23047	1.40537	1.67609	2.132	2.8059	3.9375
0.174948	0.246094	0.339898	0.452401	0.550282	0.696058	0.829697	1.02005	1.23047	1.40644	1.67679	2.13265	2.8059	3.9375
0.175169	0.246094	0.340705	0.452583	0.550282	0.696058	0.831616	1.02247	1.23047	1.40644	1.67917	2.13464	2.8059	3.96814
0.175186	0.246094	0.340888	0.452717	0.550282	0.696058	0.83264	1.02362	1.23047	1.40724	1.68195	2.13712	2.8059	3.96814
0.175357	0.246094	0.341543	0.453213	0.550282	0.696058	0.836366	1.02371	1.23047	1.40957	1.68665	2.13901	2.81333	3.96814
0.175432	0.246094	0.342486	0.453878	0.550282	0.696058	0.839781	1.0259	1.23047	1.41048	1.68707	2.14053	2.81433	3.96814
0.175459	0.246094	0.342594	0.454121	0.550282	0.696058	0.844476	1.026	1.23047	1.41133	1.6873	2.14379	2.82748	3.97577
0.175559	0.246094	0.342719	0.454283	0.550282	0.696058	0.847075	1.02706	1.23047	1.41273	1.68746	2.1445	2.82876	3.97577
0.175564	0.246094	0.342755	0.454351	0.550282	0.696058	0.849133	1.02846	1.23047	1.41286	1.68924	2.14499	2.83333	3.97577
0.175783	0.246094	0.342912	0.454422	0.550282	0.696058	0.852553	1.03155	1.23047	1.41484	1.68959	2.14614	2.83552	3.97577
0.175896	0.246094	0.343786	0.454756	0.550282	0.696058	0.853965	1.03194	1.23047	1.41514	1.69072	2.14667	2.83829	3.97577
0.175904	0.246094	0.343837	0.456095	0.550282	0.696058	0.857978	1.03296	1.23047	1.41542	1.69118	2.147	2.84017	3.98528
0.176077	0.246094	0.344075	0.456775	0.550282	0.696058	0.859842	1.0336	1.23047	1.41734	1.69498	2.14799	2.85492	4.00612
0.17608	0.246094	0.344213	0.456828	0.550282	0.696058	0.861173	1.03457	1.23047	1.41977	1.69505	2.14808	2.8562	4.01103
0.176138	0.246094	0.344708	0.457152	0.550282	0.696058	0.861722	1.03582	1.23047	1.41987	1.69511	2.15107	2.86013	4.03624
0.176179	0.246094	0.344878	0.457629	0.550282	0.696938	0.863594	1.03695	1.23047	1.42101	1.69753	2.1545	2.86809	4.03624
0.176204	0.246094	0.344965	0.458055	0.550282	0.697973	0.86486	1.03732	1.23047	1.42193	1.69785	2.15457	2.86992	4.03624
0.176359	0.246094	0.345387	0.458173	0.550282	0.698373	0.866666	1.03895	1.23047	1.42292	1.69845	2.15797	2.86992	4.07358
0.176533	0.246094	0.345443	0.458803	0.550282	0.698416	0.868978	1.04015	1.23047	1.42421	1.6991	2.15933	2.86992	4.07432
0.176595	0.246094	0.345444	0.458926	0.550282	0.699142	0.871725	1.04336	1.23047	1.42499	1.69986	2.16069	2.86992	4.08129
0.176599	0.246094	0.345639	0.459288	0.550282	0.699155	0.872303	1.04409	1.23047	1.42517	1.70126	2.16511	2.86992	4.09582
0.17681	0.246094	0.345874	0.459502	0.550282	0.699528	0.872956	1.04409	1.23047	1.42595	1.70372	2.16558	2.86992	4.09582
0.17698	0.246094	0.346106	0.459858	0.550282	0.701567	0.87483	1.04409	1.23047	1.42811	1.7057	2.16784	2.86992	4.09582
0.176996	0.246094	0.346471	0.459967	0.550282	0.701593	0.875021	1.04409	1.23047	1.42896	1.7062	2.1716	2.86992	4.09582
0.177105	0.246094	0.346608	0.460035	0.550282	0.70169	0.875644	1.04409	1.23047	1.43124	1.70661	2.1732	2.86992	4.09582
0.177313	0.246094	0.346674	0.460752	0.550282	0.702133	0.883491	1.04409	1.23047	1.43304	1.70802	2.1755	2.87409	4.09582
0.177517	0.246094	0.346985	0.461033	0.550282	0.703457	0.885411	1.04409	1.23047	1.43496	1.70868	2.17705	2.87683	4.12528
0.177558	0.246094	0.347017	0.461106	0.550282	0.704693	0.887304	1.04409	1.23047	1.43496	1.71257	2.17749	2.88045	4.12528
0.17759	0.246094	0.347053	0.461559	0.550282	0.704972	0.887304	1.04409	1.23267	1.43496	1.71321	2.17917	2.88045	4.12528
0.177812	0.246094	0.347484	0.463732	0.550282	0.708671	0.887304	1.04409	1.23336	1.43496	1.71336	2.18045	2.88045	4.12528
0.178017	0.246094	0.347571	0.464006	0.550282	0.709725	0.887304	1.04409	1.23433	1.43496	1.71548	2.18219	2.88045	4.13526
0.1781	0.246094	0.347786	0.464359	0.550282	0.711018	0.887304	1.04409	1.23481	1.43496	1.71623	2.18462	2.88045	4.1363
0.178251	0.246094	0.347939	0.465174	0.550282	0.712776	0.887304	1.04409	1.23592	1.43496	1.71678	2.18485	2.88045	4.14637
0.178303	0.246094	0.348029	0.465778	0.550282	0.714296	0.887304	1.04409	1.23685	1.43496	1.71827	2.18525	2.88045	4.18119
0.178381	0.246094	0.348029	0.465863	0.550282	0.71451	0.887304	1.04409	1.23697	1.43496	1.71924	2.18734	2.88045	4.18359
0.178594	0.246094	0.348029	0.466307	0.550282	0.715577	0.887304	1.04409	1.23758	1.43496	1.72019	2.18738	2.88045	4.18359
0.17862	0.246094	0.348029	0.467257	0.550282	0.715656	0.887304	1.04409	1.2395	1.43496	1.72039	2.19164	2.88199	4.18359
0.178707	0.246094	0.348029	0.467831	0.550282	0.718684	0.887304	1.04409	1.24043	1.43496	1.72245	2.19564	2.88247	4.18359
0.178712	0.246094	0.348029	0.467947	0.550282	0.718968	0.887304	1.04409	1.24153	1.43496	1.72266	2.20113	2.88476	4.20525
0.17876	0.246094	0.348029	0.468294	0.550282	0.721393	0.887304	1.04409	1.24165	1.43496	1.72266	2.20113	2.8868	4.20525
0.178797	0.246094	0.348029	0.468778	0.550282	0.722781	0.887304	1.04409	1.24339	1.43496	1.72266	2.20113	2.88683	4.20525
0.178929	0.246094	0.348029	0.46923	0.550282	0.722903	0.887304	1.04409	1.24466	1.43496	1.72266	2.20113	2.8976	4.20525
0.178989	0.246094	0.348029	0.469233	0.550282	0.722961	0.887304	1.04409	1.24488	1.43496	1.72266	2.20113	2.90616	4.21245
0.179134	0.246094	0.348029	0.470401	0.550282	0.722987	0.887304	1.04409	1.24558	1.43496	1.72266	2.20113	2.90951	4.23396
0.179302	0.246094	0.348029	0.470512	0.550282	0.725223	0.887304	1.04528	1.25146	1.43496	1.72266	2.21106	2.91737	4.23396
0.179573	0.246094	0.348029	0.470556	0.550282	0.725697	0.887304	1.047	1.25159	1.43496	1.72266	2.21439	2.91985	4.23396
0.179612	0.246094	0.348029	0.471718	0.550282	0.728135	0.887304	1.04736	1.25165	1.43496	1.72266	2.21484	2.91991	4.23396
0.180115	0.246094	0.348029	0.472025	0.550282	0.728478	0.887304	1.05179	1.25441	1.43496	1.72266	2.21484	2.92093	4.25765
0.180291	0.246094	0.348029	0.473431	0.550282	0.728975	0.887304	1.052	1.25472	1.43496	1.72266	2.21484	2.93196	4.29784
0.180406	0.246094	0.348029	0.473536	0.550282	0.730345	0.887304	1.0532	1.25484	1.43496	1.72266	2.21484	2.93452	4.29784
0.180612	0.246094	0.348029	0.473941	0.550282	0.733954	0.887304	1.05371	1.25484	1.43496	1.72301	2.22571	2.94355	4.30488
0.180775	0.246094	0.348029	0.474791	0.550282	0.734636	0.887304	1.0551	1.25484	1.43496	1.72488	2.22691	2.94694	4.30488
0.181028	0.246094	0.348029	0.475888	0.550282	0.736113	0.887304	1.05601	1.25484	1.43496	1.72635	2.22697	2.94704	4.30488
0.181127	0.246094	0.348029	0.475984	0.550282	0.737267	0.887304	1.05745	1.25484	1.43496	1.72651	2.22706	2.95312	4.30488
0.181136	0.246094	0.348029	0.476917	0.550282	0.738281	0.887304	1.05894	1.25484	1.43496	1.73313	2.22787	2.95312	4.30488
0.181211	0.246094	0.348029	0.477269	0.550282	0.738281	0.887304	1.06141	1.25484	1.43496	1.73439	2.22847	2.95312	4.30488
0.181969	0.246094	0.348029	0.477862	0.550282	0.738281	0.887304	1.06176	1.25484	1.43496	1.73534	2.22847	2.96216	4.34218
0.182097	0.246094	0.348029	0.478227	0.550282	0.738281	0.887304	1.06334	1.25484	1.43496	1.73765	2.22847	2.96247	4.35384
0.182161	0.246094	0.348029	0.478338	0.550282	0.738281	0.887304	1.06382	1.25484	1.43496	1.73822	2.22847	2.96336	4.36079
0.182213	0.246094	0.348029	0.478765	0.550282	0.738281	0.887304	1.06707	1.25484	1.43496	1.73945	2.22847	2.96336	4.37827
0.182286	0.246094	0.348029	0.479091	0.550282	0.738281	0.887304	1.07024	1.25484	1.43496	1.74015	2.22847	2.96336	4.38157
0.182367	0.246094	0.348029	0.47914	0.550282	0.738281	0.887304	1.07075	1.25484	1.43496	1.74015	2.23089	2.96336	4.38157
0.182623	0.246094	0.348029	0.479716	0.550282	0.738281	0.887304	1.0741	1.25484	1.43496	1.74015	2.23173	2.96336	4.38157
0.182727	0.246094	0.348029	0.479948	0.550282	0.738281	0.887304	1.07723	1.25484	1.43496	1.74015	2.23468	2.96336	4.38157
0.182748	0.246094	0.348029	0.480844	0.550282	0.738281	0.887304	1.07785	1.25484	1.43496	1.74015	2.23764	2.96336	4.38207
0.183097	0.246094	0.348029	0.481785	0.550282	0.738281	0.887304	1.08012	1.25484	1.43496	1.74015	2.24072	2.96336	4.40226
0.183109	0.246094	0.348029	0.482047	0.550282	0.738281	0.887304	1.08021	1.25484	1.43496	1.74015	2.24409	2.97356	4.43652
0.183474	0.246094	0.348029	0.482086	0.550282	0.738281	0.887304	1.08286	1.25484	1.43496	1.74015	2.24938	2.97356	4.43652
0.183697	0.246094	0.348029	0.484237	0.550282	0.738281	0.887304	1.08509	1.25484	1.43496	1.74015	2.25244	2.97356	4.43652
0.183718	0.246094	0.348029	0.485243	0.550282	0.738281	0.887304	1.08522	1.25484	1.43496	1.74015	2.25325	2.97356	4.43652
0.183749	0.246094	0.348029	0.485588	0.550282	0.738281	0.887304	1.08854	1.25484	1.43496	1.74015	2.25334	2.97356	4.43652
0.183789	0.246094	0.348029	0.485988	0.550282	0.738281	0.887304	1.08954	1.25484	1.43496	1.74015	2.2568	2.97356	4.43652
0.183803	0.246094	0.348029	0.486351	0.550282	0.738281	0.887304	1.09009	1.25484	1.43496	1.74015	2.25746	2.97356	4.43652
0.183835	0.246094	0.348029	0.487145	0.550282	0.738281	0.887304	1.09065	1.25484	1.43496	1.74015	2.26082	2.97356	4.43652
0.183893	0.246094	0.348029	0.488034	0.550282	0.738281	0.887304	1.09347	1.25484	1.43496	1.74015	2.26192	2.97356	4.43652
0.184193	0.246094	0.348029	0.488086	0.550282	0.738281	0.887304	1.09355	1.25484	1.43496	1.74015	2.26527	2.97356	4.43652
[truncated: 4,674 more rows]
