# Supplementary material for: Long-term intravital imaging of the multicolor-coded tumor microenvironment during combination immunotherapy
Source: eLife. 2016 Nov 18;5:e14756. doi: 10.7554/eLife.14756 (PMC5173323; doi:10.7554/eLife.14756)
Supplement: Figure 3—source data 6. — DOI: http://dx.doi.org/10.7554/eLife.14756.021 [file elife-14756-fig3-data6.xls]

## Sheet: displacement（um）
0	0	0	0	0	0	0	0	0	0	0	0	0	0	0.146422	0.0584368	0.0821572	0.0201741	0.110763	0.147506	0.199026	0.231965	0.15027	0.121204	0.15992	0.425019	0.44994	0.722696	0.80371	0.862457
0	0	0	0	0	0	0	0	0	0	0	0	0	0	0.189274	0.210325	0.102222	0.122661	0.153777	0.219408	0.226967	0.242273	0.266786	0.294443	0.406246	0.471453	0.64419	0.745015	1.06851	1.00439
0	0	0	0	0	0	0	0	0	0	0	0	0	0.0868544	0.203066	0.211016	0.216236	0.145185	0.164851	0.231467	0.244641	0.250274	0.269808	0.32589	0.422168	0.523769	0.65469	0.853837	1.1265	1.08971
0	0	0	0	0	0	0	0	0	0	0	0	0	0.115644	0.2091	0.233854	0.219477	0.202175	0.206299	0.232994	0.260866	0.302159	0.368195	0.372122	0.485458	0.601043	0.803599	1.04257	1.25484	1.23047
0	0	0	0	0	0	0	0	0	0	0	0	0	0.163851	0.22275	0.237802	0.237069	0.227787	0.227636	0.237904	0.260955	0.309176	0.370544	0.45212	0.54858	0.625518	0.814744	1.09438	1.27212	1.39776
0	0	0	0	0	0	0	0	0	0	0	0	0	0.169341	0.246094	0.246094	0.246094	0.314837	0.237921	0.237947	0.283974	0.365316	0.448162	0.466775	0.558927	0.638537	0.8718	1.1152	1.39635	1.40862
0	0	0	0	0	0	0	0	0	0	0	0	0	0.17638	0.246094	0.246094	0.246094	0.316681	0.253713	0.336094	0.294495	0.376307	0.484666	0.478043	0.562846	0.650713	0.873083	1.15176	1.42487	1.48351
0	0	0	0	0	0	0	0	0	0	0	0	0	0.199975	0.246094	0.246094	0.260397	0.348029	0.323374	0.350108	0.321732	0.418044	0.485101	0.54209	0.583142	0.677264	0.915992	1.15186	1.45991	1.74015
0	0	0	0	0	0	0	0	0	0	0	0	0	0.223122	0.246094	0.246094	0.271426	0.348029	0.348029	0.350791	0.35337	0.456709	0.490495	0.564946	0.668081	0.718623	0.92825	1.23513	1.47382	1.87597
0	0	0	0	0	0	0	0	0	0	0	0	0.0600189	0.229779	0.246094	0.251533	0.287376	0.350791	0.348548	0.372997	0.373087	0.462297	0.544239	0.609217	0.684412	0.823949	0.994358	1.27367	1.47656	1.89348
0	0	0	0	0	0	0	0	0	0	0	0	0.0659536	0.235253	0.246094	0.28217	0.290617	0.375366	0.350791	0.38246	0.448448	0.513771	0.5555	0.615549	0.696165	0.824861	1.03645	1.3042	1.52708	1.91311
0	0	0	0	0	0	0	0	0	0	0	0	0.104487	0.237949	0.246094	0.285997	0.296564	0.380143	0.373174	0.404069	0.453532	0.530561	0.572939	0.634304	0.717673	0.826691	1.04409	1.36272	1.54933	1.99767
0	0	0	0	0	0	0	0	0	0	0	0	0.109867	0.239557	0.246493	0.286029	0.30255	0.382931	0.374437	0.429131	0.457254	0.536461	0.581543	0.674492	0.724614	0.858669	1.04534	1.37912	1.57577	2.07449
0	0	0	0	0	0	0	0	0	0	0	0	0.121124	0.246094	0.268515	0.292378	0.31533	0.400186	0.378888	0.4347	0.465963	0.544137	0.583053	0.684458	0.730133	0.86927	1.04902	1.39212	1.57577	2.11214
0	0	0	0	0	0	0	0	0	0	0	0	0.138787	0.246094	0.273271	0.297028	0.342827	0.413912	0.40542	0.44902	0.468931	0.548471	0.600605	0.697246	0.74432	0.872501	1.10056	1.40766	1.66265	2.18291
0	0	0	0	0	0	0	0	0	0	0	0.0458133	0.155126	0.246094	0.274962	0.308617	0.348029	0.418223	0.422829	0.466268	0.470658	0.552054	0.611694	0.710053	0.76599	0.911597	1.11026	1.40867	1.70924	2.26701
0	0	0	0	0	0	0	0	0	0	0	0.0532123	0.176828	0.246094	0.277138	0.316197	0.350791	0.428671	0.465204	0.481498	0.484687	0.554308	0.616227	0.71179	0.768929	0.914762	1.13899	1.42369	1.7889	2.35483
0	0	0	0	0	0	0	0	0	0	0	0.06812	0.183591	0.246094	0.277142	0.317847	0.357523	0.430646	0.466127	0.493915	0.508261	0.559973	0.627806	0.724586	0.769568	0.938431	1.19681	1.43496	1.79516	2.46094
0	0	0	0	0	0	0	0	0	0	0.0483413	0.0703441	0.191301	0.246094	0.281729	0.325334	0.384955	0.438796	0.481003	0.49658	0.518355	0.566248	0.62852	0.73316	0.778528	0.95402	1.23047	1.45648	1.84577	2.46094
0	0	0	0	0	0	0	0	0	0	0.0524129	0.0893332	0.194572	0.246094	0.285928	0.335178	0.386362	0.445718	0.486673	0.50413	0.532035	0.566452	0.630142	0.73541	0.782626	0.984375	1.23047	1.47656	1.85744	2.46094
0	0	0	0	0	0	0	0	0	0	0.0609733	0.0927904	0.197747	0.246094	0.286481	0.336872	0.389254	0.455326	0.491673	0.508335	0.542019	0.56797	0.644516	0.738281	0.820893	1.01467	1.24344	1.47656	1.85894	2.46094
0	0	0	0	0	0	0	0	0	0	0.0690767	0.0980974	0.201982	0.246094	0.296569	0.340177	0.400737	0.457375	0.492779	0.52573	0.54978	0.578878	0.657138	0.747108	0.831357	1.04293	1.24675	1.47656	1.89775	2.46094
0	0	0	0	0	0	0	0	0	0	0.0744312	0.108337	0.208125	0.246094	0.305899	0.348029	0.400772	0.464345	0.500294	0.532189	0.552922	0.620244	0.667915	0.748342	0.860217	1.04409	1.25484	1.49693	1.9202	2.55191
0	0	0	0	0	0	0	0	0	0	0.0777466	0.112982	0.21524	0.246094	0.311762	0.348029	0.405731	0.467733	0.506564	0.548105	0.571361	0.632888	0.681268	0.761176	0.883479	1.04409	1.25564	1.49693	1.92199	2.6707
0	0	0	0	0	0	0	0	0	0.030297	0.0800985	0.117793	0.217555	0.246094	0.315572	0.348029	0.407367	0.472486	0.518716	0.548363	0.580336	0.64345	0.685133	0.764285	0.887304	1.04682	1.28252	1.54877	1.96875	2.75141
0	0	0	0	0	0	0	0	0	0.0446321	0.0881693	0.129297	0.219574	0.246094	0.332002	0.348029	0.417171	0.482926	0.529939	0.550282	0.58851	0.645461	0.71286	0.767148	0.892568	1.056	1.34222	1.57577	1.96875	2.75141
0	0	0	0	0	0	0	0	0	0.0451111	0.0905212	0.137132	0.220773	0.246094	0.34647	0.350791	0.417437	0.484456	0.530478	0.550282	0.596328	0.648757	0.738281	0.774218	0.914972	1.09098	1.37004	1.57577	1.96875	2.75141
0	0	0	0	0	0	0	0	0	0.0582033	0.0970398	0.14356	0.223762	0.246094	0.348029	0.353171	0.42156	0.492188	0.539512	0.561964	0.599624	0.65117	0.738281	0.797952	0.959924	1.09625	1.37717	1.61163	1.98407	2.75401
0	0	0	0	0	0	0	0	0	0.0604059	0.103501	0.151978	0.230161	0.248047	0.348029	0.353193	0.43564	0.492188	0.539612	0.563022	0.6	0.684128	0.739764	0.814619	0.981715	1.10056	1.37743	1.62698	2.00031	2.78131
0	0	0	0	0	0	0	0	0.0271872	0.0676021	0.106713	0.153278	0.233205	0.248047	0.348029	0.357481	0.437182	0.492188	0.543405	0.565808	0.610923	0.687587	0.743482	0.829819	0.983152	1.12771	1.39212	1.63019	2.02934	2.79129
0	0	0	0	0	0	0	0	0.0350822	0.0740779	0.107506	0.172316	0.239124	0.249287	0.348029	0.36397	0.441976	0.493913	0.550282	0.576986	0.619022	0.707182	0.753235	0.840792	0.984375	1.14993	1.39212	1.63093	2.07142	2.81237
0	0	0	0	0	0	0	0	0.0470229	0.085278	0.114122	0.175494	0.246094	0.257399	0.350791	0.364485	0.445814	0.497088	0.550282	0.578318	0.636338	0.727388	0.768241	0.843063	0.984375	1.15299	1.40445	1.65085	2.11697	2.86811
0	0	0	0	0	0	0	0	0.0513582	0.0857964	0.118848	0.176131	0.246094	0.27021	0.351691	0.38321	0.449201	0.501029	0.550282	0.594023	0.648781	0.734463	0.771021	0.848502	1.00645	1.16674	1.40482	1.66065	2.1198	2.87079
0	0	0	0	0	0	0	0	0.0608566	0.086903	0.119363	0.17787	0.246094	0.272802	0.355027	0.390605	0.451866	0.501175	0.550282	0.61942	0.660403	0.734711	0.776799	0.861115	1.01467	1.17875	1.41831	1.66246	2.1419	2.90905
0	0	0	0	0	0	0	0	0.0709898	0.0919183	0.129619	0.186913	0.246094	0.276157	0.357546	0.392564	0.45216	0.51115	0.550282	0.621038	0.663644	0.735762	0.777251	0.875776	1.04267	1.18346	1.42499	1.68554	2.14512	2.94679
0	0	0	0	0	0	0	0	0.0837099	0.0967171	0.139176	0.190378	0.246094	0.292391	0.357582	0.395129	0.459277	0.513524	0.555796	0.622995	0.675909	0.73577	0.778217	0.878299	1.04409	1.20917	1.43496	1.70058	2.15895	3.02231
0	0	0	0	0	0	0	0	0.0840483	0.101406	0.145171	0.192539	0.246094	0.292667	0.358227	0.403532	0.459456	0.519401	0.558808	0.624994	0.683507	0.738281	0.778217	0.882529	1.04409	1.2152	1.43496	1.70121	2.17834	3.18093
0	0	0	0	0	0	0	0.0212928	0.0889009	0.107019	0.147057	0.196645	0.246094	0.295642	0.360007	0.407133	0.459874	0.522188	0.56297	0.62708	0.690745	0.738281	0.781777	0.887304	1.04678	1.21588	1.45151	1.74015	2.17875	3.19142
0	0	0	0	0	0	0	0.0223444	0.0927212	0.107203	0.149116	0.197741	0.246094	0.297759	0.367212	0.407578	0.47023	0.525463	0.568897	0.636783	0.695736	0.738281	0.785053	0.891108	1.04686	1.23047	1.45733	1.74015	2.20113	3.2334
0	0	0	0	0	0	0	0.0230364	0.0956638	0.108752	0.152976	0.197854	0.246094	0.298254	0.368923	0.415365	0.472627	0.526395	0.572421	0.637057	0.696058	0.738868	0.786438	0.894982	1.05769	1.23047	1.47656	1.74015	2.20452	3.38744
0	0	0	0	0	0	0	0.0293092	0.0983993	0.121935	0.160378	0.204837	0.246094	0.300323	0.373703	0.419432	0.473708	0.526632	0.57767	0.641584	0.696058	0.741378	0.800695	0.901274	1.05892	1.23047	1.47656	1.74657	2.21086	3.38951
0	0	0	0	0	0	0	0.0338475	0.0990433	0.124554	0.169939	0.208118	0.246094	0.300709	0.373821	0.430397	0.480674	0.531656	0.589183	0.644913	0.703731	0.743936	0.814078	0.912658	1.06255	1.23047	1.47656	1.75495	2.21484	3.53718
0	0	0	0	0	0	0	0.037015	0.113606	0.127708	0.171367	0.214151	0.246094	0.306666	0.377703	0.430509	0.482648	0.533078	0.589266	0.654252	0.704305	0.746227	0.822748	0.921822	1.07027	1.23047	1.49024	1.7684	2.28755	3.81591
0	0	0	0	0	0	0.0145279	0.0376775	0.114824	0.129596	0.177598	0.215537	0.246094	0.309375	0.380229	0.440693	0.488794	0.533152	0.592082	0.654577	0.711599	0.750762	0.828688	0.927489	1.0834	1.23532	1.49693	1.77342	2.29544	3.89108
0	0	0	0	0	0	0.0252714	0.0388448	0.115457	0.132618	0.179438	0.217514	0.246094	0.310231	0.383449	0.44753	0.490411	0.533895	0.601807	0.659951	0.738281	0.752528	0.835515	0.928871	1.08408	1.24024	1.49693	1.77461	2.31095	3.9062
0	0	0	0	0	0	0.0342064	0.0414931	0.120185	0.135513	0.181113	0.221506	0.246094	0.310633	0.38396	0.453274	0.492188	0.539675	0.60445	0.664514	0.738281	0.762795	0.839186	0.93457	1.08556	1.25484	1.52163	1.78383	2.32164	3.92199
0	0	0	0	0	0	0.0364071	0.0627737	0.122376	0.149743	0.18548	0.226127	0.246094	0.314981	0.393861	0.454161	0.492188	0.550282	0.612289	0.668246	0.739207	0.766231	0.840679	0.946877	1.09091	1.26381	1.52636	1.82751	2.3677	5.24145
0	0	0	0	0	0	0.0376724	0.0653711	0.123594	0.150463	0.189067	0.226251	0.246094	0.319648	0.395054	0.456019	0.492188	0.550282	0.613361	0.669172	0.743067	0.778217	0.841052	0.952239	1.09586	1.27666	1.53167	1.88357	2.37494	5.66375
0	0	0	0	0	0	0.0419222	0.0683238	0.123947	0.151365	0.189374	0.229677	0.248047	0.320291	0.402266	0.460737	0.492188	0.550282	0.617601	0.677345	0.743671	0.778217	0.843394	0.956373	1.09602	1.27823	1.53608	1.8958	2.4376	6.15234
0	0	0	0	0	0	0.0427745	0.0715233	0.130287	0.155591	0.194776	0.230101	0.24909	0.323503	0.407633	0.46205	0.494266	0.550282	0.628123	0.67925	0.748956	0.778217	0.846659	0.961631	1.09995	1.28306	1.54555	1.89917	2.44174	6.20117
0	0	0	0	0	0	0.0455315	0.0772559	0.135386	0.164815	0.194881	0.230651	0.249536	0.323696	0.408246	0.469886	0.500891	0.550372	0.632076	0.683041	0.750231	0.778217	0.847953	0.966061	1.10056	1.28608	1.57577	1.93296	2.44996	8.72372
0	0	0	0	0	0	0.0486409	0.0778491	0.138208	0.165314	0.195646	0.231301	0.24983	0.326993	0.408949	0.475064	0.509652	0.551879	0.633399	0.690367	0.750411	0.779167	0.849981	0.975076	1.11335	1.30305	1.57577	1.96875	2.46094	8.85845
0	0	0	0	0	0	0.0488521	0.0791537	0.138215	0.166848	0.197598	0.232584	0.255648	0.333941	0.412158	0.479704	0.518692	0.55239	0.635753	0.695444	0.753109	0.794035	0.858539	0.983621	1.11636	1.30465	1.57577	1.96875	2.46094	10.0045
0	0	0	0	0	0	0.0582793	0.0911818	0.140542	0.167384	0.199731	0.23452	0.263494	0.334766	0.417802	0.483889	0.523926	0.553398	0.636025	0.695949	0.75545	0.798494	0.861324	0.984375	1.12441	1.32526	1.58955	1.96875	2.46094	13.591
0	0	0	0	0	0	0.0588509	0.0974681	0.14073	0.169222	0.203666	0.238413	0.265913	0.336631	0.424674	0.485179	0.528357	0.553418	0.639566	0.696058	0.760839	0.799376	0.87266	0.984375	1.12469	1.32526	1.59264	1.98133	2.46094	13.7188
0	0	0	0	0	0	0.0592624	0.0987338	0.142356	0.169293	0.211362	0.241183	0.272229	0.347429	0.431383	0.489837	0.529171	0.556358	0.64231	0.696058	0.763313	0.804488	0.882451	0.984375	1.16427	1.32754	1.59298	1.99259	2.46094	14.493
0	0	0	0	0	0	0.0620644	0.100559	0.144231	0.171054	0.21245	0.243564	0.272517	0.348029	0.432955	0.490143	0.53111	0.557825	0.644176	0.697781	0.763817	0.808832	0.887304	0.997003	1.19101	1.33198	1.62755	2.00847	2.51871	14.6981
0	0	0	0	0	0.0100786	0.0638618	0.105741	0.144568	0.177659	0.21671	0.245913	0.283821	0.348029	0.435875	0.492188	0.536308	0.568735	0.6498	0.698862	0.764732	0.809183	0.900541	1.00304	1.19979	1.35887	1.63291	2.01252	2.53369	15.0881
0	0	0	0	0	0.0108574	0.0658477	0.111941	0.147853	0.181163	0.220618	0.246094	0.284565	0.348029	0.43995	0.492188	0.538559	0.576766	0.650761	0.700816	0.76507	0.815026	0.902125	1.00924	1.21764	1.36628	1.63702	2.01952	2.53386	17.7124
0	0	0	0	0	0.0118151	0.0668399	0.113041	0.14891	0.185273	0.22323	0.246094	0.289053	0.348319	0.441656	0.492188	0.5411	0.577658	0.652233	0.701074	0.778217	0.819195	0.91292	1.01467	1.22392	1.37328	1.64654	2.02934	2.54314	18.4226
0	0	0	0	0	0.022772	0.0757222	0.113116	0.152594	0.189592	0.233818	0.246094	0.295129	0.353792	0.442969	0.492188	0.543242	0.580239	0.657419	0.702164	0.778217	0.829099	0.914585	1.02116	1.22403	1.39212	1.65085	2.03712	2.54853	20.3129
0	0	0	0	0	0.0265887	0.0790733	0.114241	0.154837	0.189961	0.235169	0.246094	0.295664	0.355817	0.447375	0.492188	0.549078	0.583211	0.658614	0.705322	0.778217	0.831302	0.914722	1.04409	1.23047	1.39212	1.65085	2.03741	2.56793	21.2102
0	0	0	0	0	0.0310868	0.0801323	0.114819	0.156121	0.192926	0.236327	0.246094	0.297607	0.362082	0.449947	0.494471	0.550282	0.583263	0.661345	0.705334	0.778217	0.834313	0.925835	1.04409	1.23047	1.39212	1.65085	2.04395	2.63887	22.3694
0	0	0	0	0	0.0314213	0.0846063	0.116081	0.158806	0.201395	0.238689	0.246094	0.300029	0.368426	0.454339	0.496453	0.550282	0.58362	0.661887	0.713682	0.778217	0.844144	0.927136	1.04981	1.23047	1.39212	1.66539	2.04516	2.66012	23.0508
0	0	0	0	0.0130902	0.0345814	0.0855633	0.120085	0.167271	0.20297	0.240311	0.246094	0.303888	0.373541	0.455931	0.496827	0.550282	0.598125	0.663379	0.713714	0.778217	0.845604	0.932472	1.05341	1.23047	1.40868	1.68458	2.05418	2.67039	23.2164
0	0	0	0	0.022337	0.0351755	0.0867983	0.121694	0.167683	0.203787	0.240361	0.246094	0.304659	0.373794	0.47409	0.500862	0.550282	0.599413	0.663751	0.726795	0.783667	0.852228	0.943572	1.05451	1.23047	1.40941	1.68847	2.05443	2.70687	25.6069
0	0	0	0	0.0275213	0.0412067	0.0878266	0.126257	0.168305	0.204072	0.243231	0.246094	0.306311	0.373851	0.477887	0.507612	0.550282	0.604216	0.668543	0.729464	0.784393	0.854688	0.944853	1.05672	1.23047	1.43496	1.71652	2.07477	2.73221	25.8691
0	0	0	0	0.0292764	0.0494204	0.0902745	0.126621	0.168822	0.204949	0.246094	0.246094	0.310801	0.379254	0.478125	0.508767	0.550282	0.604398	0.670022	0.731349	0.787566	0.857855	0.946905	1.07455	1.23047	1.43496	1.73736	2.07908	2.744	26.5728
0	0	0	0	0.0338045	0.0532076	0.0922274	0.126996	0.170752	0.207285	0.246094	0.246094	0.310943	0.38152	0.478764	0.509464	0.550282	0.608062	0.67406	0.736389	0.789894	0.865479	0.96222	1.07656	1.23702	1.44284	1.74015	2.09587	2.75141	26.9507
0	0	0	0	0.0352331	0.060166	0.0931153	0.131103	0.172515	0.208801	0.246094	0.246094	0.311546	0.391151	0.479174	0.512014	0.550282	0.610838	0.674752	0.738281	0.790235	0.865793	0.970098	1.07662	1.2376	1.47656	1.75256	2.11301	2.75141	27.6504
0	0	0	0	0.0355069	0.0606666	0.0986374	0.132937	0.173212	0.210556	0.246094	0.246094	0.31263	0.392751	0.481779	0.516309	0.552976	0.611548	0.68284	0.740233	0.7937	0.87485	0.978572	1.08241	1.24076	1.47786	1.75533	2.12965	2.79542	30.3931
0	0	0	0	0.0363372	0.068488	0.100771	0.13957	0.174142	0.211369	0.246094	0.246094	0.317072	0.394457	0.482743	0.519287	0.553643	0.619311	0.686411	0.754271	0.799642	0.876766	0.982989	1.09624	1.25352	1.47857	1.76645	2.15979	2.79642	30.4401
0	0	0	0	0.0367373	0.0701761	0.101983	0.141554	0.175982	0.213447	0.246094	0.246094	0.317277	0.401666	0.489039	0.521402	0.553842	0.621506	0.686461	0.756912	0.81232	0.88273	0.984375	1.10056	1.25476	1.47911	1.76721	2.17369	2.83316	30.4481
0	0	0	0	0.0468846	0.0721476	0.102363	0.144454	0.179653	0.215321	0.246094	0.246094	0.319435	0.423472	0.489452	0.527251	0.555806	0.624291	0.686664	0.76528	0.814654	0.887304	0.984375	1.10056	1.25484	1.48112	1.77461	2.20113	2.90146	32.0523
0	0	0	0	0.0518482	0.0742226	0.103638	0.147497	0.186412	0.216052	0.246094	0.246094	0.321661	0.427345	0.49047	0.528642	0.560707	0.625229	0.691704	0.770125	0.816578	0.887304	0.984375	1.10056	1.25484	1.49215	1.77461	2.20113	2.9135	33.1713
0	0	0	0	0.0544529	0.0762926	0.104328	0.14759	0.187646	0.216454	0.246094	0.246094	0.32234	0.427651	0.491121	0.529176	0.567536	0.627037	0.696058	0.771693	0.826448	0.8899	0.984375	1.10483	1.25484	1.49693	1.77663	2.20113	3.07188	38.8411
0	0	0	0	0.0557538	0.0765356	0.110568	0.148109	0.193334	0.22388	0.246094	0.246094	0.329653	0.428751	0.492188	0.530199	0.571446	0.628463	0.696058	0.778217	0.83244	0.893985	0.988889	1.10582	1.26842	1.49693	1.7797	2.21388	3.07241	39.3144
0	0	0	0	0.0582947	0.0799505	0.115168	0.148422	0.195037	0.224889	0.246094	0.246094	0.32976	0.429852	0.492188	0.530369	0.575619	0.630051	0.704928	0.778217	0.834949	0.894481	1.01013	1.15785	1.27636	1.49693	1.78028	2.21484	3.07293	41.0444
0	0	0	0	0.0586366	0.0815625	0.117062	0.148597	0.196031	0.226312	0.246094	0.246094	0.330456	0.430401	0.492188	0.5339	0.577074	0.63065	0.725145	0.778217	0.835145	0.898415	1.01467	1.15935	1.28456	1.51688	1.82818	2.28416	3.07393	41.2694
0	0	0	0	0.0611067	0.08369	0.118862	0.150896	0.198824	0.226686	0.246094	0.246094	0.333625	0.434604	0.492188	0.534523	0.581086	0.632803	0.729311	0.778217	0.837723	0.917397	1.01467	1.1617	1.32526	1.52709	1.83201	2.29211	3.09713	42.6745
0	0	0	0	0.0626994	0.0852157	0.121133	0.151074	0.199657	0.228855	0.246094	0.246094	0.340415	0.435033	0.492188	0.541158	0.587792	0.633009	0.72941	0.778217	0.839156	0.922133	1.0169	1.16291	1.32526	1.54673	1.83476	2.33483	3.13452	42.8708
0	0	0	0	0.0679972	0.087152	0.123911	0.155619	0.199838	0.235788	0.246094	0.246094	0.344256	0.435154	0.492188	0.543895	0.589175	0.643254	0.731042	0.778217	0.845827	0.926675	1.02752	1.17797	1.32526	1.55643	1.87437	2.38053	3.22102	44.8032
0	0	0	0	0.0756665	0.0951062	0.126592	0.161113	0.202819	0.236113	0.246094	0.246094	0.348029	0.435841	0.492188	0.544492	0.591361	0.652159	0.73397	0.778217	0.846454	0.928462	1.03381	1.2056	1.35083	1.55643	1.88632	2.38429	3.25381	45.1433
0	0	0	0	0.0781352	0.0983671	0.127329	0.162291	0.203814	0.240828	0.246094	0.246094	0.348029	0.435986	0.492188	0.545501	0.592048	0.664764	0.735142	0.778217	0.852714	0.928877	1.03669	1.21488	1.35416	1.56075	1.9158	2.38727	3.30753	47.1136
0	0	0	0	0.0784461	0.0993881	0.128413	0.162443	0.206012	0.241009	0.246094	0.246094	0.348029	0.439568	0.492188	0.550282	0.596048	0.667236	0.738281	0.778217	0.858983	0.930687	1.03988	1.22662	1.35931	1.57577	1.91677	2.38804	3.3108	48.1492
0	0	0	0	0.0786317	0.101641	0.132203	0.163294	0.207589	0.243463	0.246094	0.246196	0.348029	0.442645	0.492188	0.550282	0.598237	0.671024	0.738281	0.784393	0.858994	0.936578	1.04409	1.23047	1.36811	1.57577	1.91775	2.39229	3.56519	50.8159
0	0	0	0	0.0787556	0.102153	0.133764	0.164238	0.208144	0.246094	0.246094	0.248047	0.348029	0.445887	0.492188	0.550282	0.599005	0.672713	0.738281	0.784692	0.860018	0.946223	1.04409	1.23047	1.37423	1.57577	1.92851	2.39281	3.57813	51.5016
0	0	0	0.00767343	0.0791804	0.102471	0.136888	0.166045	0.2115	0.246094	0.246094	0.248047	0.348029	0.453514	0.492902	0.550282	0.606873	0.678231	0.73964	0.78974	0.860752	0.95326	1.04834	1.23047	1.38523	1.58193	1.93021	2.40469	3.65845	51.7382
0	0	0	0.0130087	0.0800392	0.108066	0.137075	0.166602	0.212978	0.246094	0.246094	0.251995	0.348029	0.455444	0.495975	0.550282	0.60907	0.68049	0.739811	0.801822	0.864962	0.973337	1.05554	1.23047	1.39212	1.59583	1.93408	2.42374	3.68261	53.4393
0	0	0	0.0225028	0.0810789	0.108493	0.139825	0.166654	0.213231	0.246094	0.246094	0.25281	0.350097	0.462111	0.496094	0.550282	0.614023	0.683064	0.741764	0.806049	0.868084	0.974335	1.06592	1.23047	1.39212	1.60062	1.93908	2.42597	3.76348	53.5121
0	0	0	0.0243986	0.0824236	0.108911	0.140169	0.16696	0.213598	0.246094	0.246094	0.262434	0.350791	0.462625	0.496162	0.550282	0.618106	0.683858	0.74656	0.808269	0.868202	0.983041	1.07934	1.23047	1.39212	1.61359	1.94474	2.44219	4.08105	53.6001
0	0	0	0.0246493	0.0824987	0.110009	0.143186	0.16976	0.214508	0.246094	0.246094	0.264322	0.350916	0.463396	0.497528	0.550886	0.618852	0.684824	0.749375	0.809057	0.880136	0.984375	1.08464	1.23047	1.40865	1.62121	1.94514	2.44892	4.13893	57.3574
0	0	0	0.0284475	0.0830056	0.110307	0.152094	0.170473	0.215602	0.246094	0.246094	0.264787	0.36227	0.469027	0.501845	0.553726	0.62308	0.684884	0.755567	0.809692	0.883107	0.984375	1.10056	1.23475	1.41495	1.63782	1.95706	2.45572	4.17635	59.3127
0	0	0	0.0287079	0.0858837	0.111761	0.152832	0.171621	0.217801	0.246094	0.246094	0.265788	0.364749	0.470445	0.502191	0.55757	0.624	0.690886	0.758339	0.815946	0.886408	0.984375	1.10056	1.23751	1.43496	1.63843	1.96364	2.46094	5.11362	59.5968
0	0	0	0.0378012	0.0861458	0.113878	0.155181	0.17587	0.219245	0.246094	0.246094	0.275099	0.370306	0.47536	0.508459	0.566241	0.630557	0.692303	0.763979	0.816528	0.887304	0.984375	1.10056	1.24136	1.43496	1.64078	1.96875	2.46094	5.12513	59.7746
0	0	0	0.0391809	0.0879864	0.114362	0.155608	0.178484	0.22145	0.246094	0.246094	0.27797	0.371503	0.484471	0.514591	0.567101	0.635476	0.696058	0.764327	0.817115	0.887304	0.984375	1.10056	1.24488	1.43496	1.65085	1.97569	2.47321	5.55433	60.0074
0	0	0	0.0419424	0.0881041	0.115732	0.156225	0.180421	0.221465	0.246094	0.246094	0.287254	0.371536	0.492124	0.514717	0.569845	0.639041	0.696058	0.770171	0.820668	0.887304	0.984375	1.10056	1.25484	1.43894	1.65085	1.98407	2.50194	5.61372	60.5687
0	0	0	0.045546	0.0894717	0.116355	0.156436	0.182615	0.222041	0.246094	0.246094	0.287552	0.380055	0.492188	0.514953	0.574921	0.643641	0.696877	0.776576	0.82175	0.888704	0.989825	1.10122	1.25484	1.44171	1.66288	1.99132	2.50884	5.66935	63.9285
0	0	0	0.0514808	0.089683	0.123959	0.157014	0.183932	0.22278	0.246094	0.246094	0.295717	0.382769	0.492188	0.515789	0.584567	0.651186	0.70363	0.778217	0.822071	0.89151	0.994527	1.10554	1.25484	1.45306	1.66389	2.01573	2.50967	5.89875	64.5041
0	0	0	0.0515439	0.0903891	0.12434	0.157093	0.185007	0.223498	0.246094	0.246094	0.299407	0.383201	0.492188	0.519417	0.585305	0.654564	0.704806	0.778217	0.825811	0.896641	1.00232	1.11044	1.25484	1.46141	1.68385	2.02776	2.52002	5.94294	66.1523
0	0	0	0.0537078	0.0948832	0.124443	0.157541	0.185631	0.22555	0.246094	0.246094	0.300138	0.384453	0.492188	0.52208	0.592899	0.655204	0.70625	0.778217	0.829732	0.896765	1.00589	1.112	1.27651	1.46257	1.68944	2.02934	2.53369	6.00791	66.4151
0	0	0	0.0539103	0.09659	0.124794	0.158331	0.1889	0.227863	0.246094	0.246094	0.300398	0.388534	0.492188	0.524406	0.60211	0.655607	0.720407	0.778217	0.83491	0.897163	1.00982	1.11663	1.28722	1.47656	1.69096	2.04174	2.53369	6.20117	67.4418
0	0	0	0.056069	0.0972192	0.126793	0.159296	0.189282	0.22852	0.246094	0.246094	0.301338	0.390147	0.492188	0.5274	0.603794	0.657007	0.721909	0.778217	0.852746	0.897398	1.01363	1.11732	1.29271	1.47656	1.70091	2.05043	2.59808	8.05149	72.2095
0	0	0	0.0584971	0.0979564	0.127378	0.162265	0.193259	0.229097	0.246094	0.246094	0.3062	0.39747	0.492188	0.5321	0.609218	0.658867	0.724154	0.778217	0.861213	0.898762	1.01466	1.12483	1.30796	1.47656	1.70566	2.10263	2.60093	9.76059	74.9461
0	0	0.0120611	0.0585998	0.0979651	0.134139	0.163716	0.194957	0.231107	0.246094	0.246094	0.320024	0.397497	0.492188	0.535182	0.612935	0.665035	0.734191	0.783497	0.861696	0.901793	1.01467	1.13174	1.31025	1.47741	1.70568	2.10263	2.60363	10.0802	77.4327
0	0	0.0166418	0.0587502	0.0981524	0.135253	0.163738	0.195311	0.231115	0.246094	0.246094	0.326583	0.399661	0.492188	0.535521	0.615209	0.668779	0.736469	0.784393	0.883342	0.903978	1.01467	1.14109	1.31837	1.47947	1.72266	2.11466	2.64629	11.1948	77.7065
0	0	0.0171583	0.060958	0.0982289	0.135996	0.164793	0.195974	0.23118	0.246094	0.246094	0.327675	0.402771	0.492188	0.537313	0.615453	0.675376	0.738281	0.784566	0.887304	0.915527	1.01467	1.14714	1.32485	1.49595	1.72851	2.11698	2.65257	11.4774	82.4546
0	0	0.0199397	0.0616621	0.0991032	0.137079	0.166869	0.196092	0.231252	0.246094	0.246094	0.332945	0.403539	0.492188	0.54338	0.616605	0.680565	0.738281	0.785048	0.887304	0.925802	1.01467	1.1641	1.32526	1.50162	1.74015	2.11772	2.70703	12.1676	85.2172
0	0	0.0205326	0.0625297	0.10332	0.137377	0.167746	0.197155	0.231377	0.246094	0.2463	0.333746	0.409568	0.492188	0.546993	0.616703	0.680892	0.738281	0.787271	0.888996	0.931023	1.01467	1.187	1.32526	1.50229	1.74015	2.12001	2.72925	12.8347	86.9407
0	0	0.0208952	0.0625931	0.103495	0.13782	0.171288	0.197756	0.23254	0.246094	0.246921	0.333856	0.409859	0.492188	0.547744	0.619564	0.680955	0.738281	0.789618	0.892294	0.932878	1.01792	1.18701	1.32526	1.50278	1.75217	2.19718	2.75141	13.052	92.49
0	0	0.0227171	0.0644759	0.106111	0.137947	0.17218	0.199924	0.236294	0.246094	0.247085	0.338065	0.414013	0.492188	0.550282	0.62495	0.682518	0.738281	0.792746	0.895063	0.934645	1.01826	1.1878	1.32526	1.50408	1.75533	2.20113	2.75659	13.3096	102.779
0	0	0.0232594	0.0648344	0.107173	0.140241	0.1726	0.20005	0.237217	0.246094	0.248047	0.339733	0.414093	0.492188	0.550282	0.625191	0.684614	0.747846	0.798755	0.895306	0.948049	1.01881	1.21944	1.32526	1.51378	1.75679	2.20113	2.77623	14.2287	117.482
0	0	0.0246935	0.0653225	0.109186	0.142074	0.17297	0.200241	0.239218	0.246094	0.248047	0.341792	0.423077	0.492188	0.550282	0.625201	0.690094	0.751793	0.807504	0.895778	0.948414	1.04004	1.22173	1.32526	1.51727	1.76324	2.20113	2.86421	14.637
0	0	0.0259165	0.0664601	0.110032	0.144058	0.173395	0.201319	0.239414	0.246094	0.248047	0.342483	0.423333	0.494031	0.550282	0.627091	0.691484	0.76118	0.808058	0.898536	0.966617	1.04102	1.22342	1.32526	1.52259	1.76544	2.20113	2.87873	14.723
0	0	0.0265382	0.067842	0.111285	0.145249	0.175168	0.202233	0.240819	0.246094	0.249323	0.342632	0.426136	0.496094	0.550282	0.627979	0.696058	0.769374	0.812023	0.90261	0.974248	1.04386	1.22813	1.32898	1.52638	1.77461	2.21484	2.89284	15.0881
0	0	0.0268242	0.0680583	0.111301	0.146529	0.177843	0.20233	0.242626	0.246094	0.249597	0.347032	0.427379	0.496178	0.550282	0.632095	0.696058	0.775237	0.813215	0.907797	0.976478	1.04409	1.23047	1.35089	1.53346	1.77696	2.21484	2.92136	15.3328
0	0	0.0269425	0.0680726	0.111554	0.147481	0.177846	0.204493	0.24266	0.246094	0.249743	0.348029	0.432077	0.496466	0.550282	0.632974	0.696058	0.778217	0.814964	0.907998	0.984375	1.06256	1.23047	1.38201	1.54492	1.78776	2.21484	2.95088	16.3144
0	0	0.0283972	0.0688961	0.117265	0.14852	0.177884	0.206044	0.246094	0.246094	0.252555	0.348029	0.432858	0.500023	0.550282	0.634095	0.698904	0.778217	0.82246	0.909202	0.984375	1.08968	1.23047	1.38459	1.55643	1.79776	2.21582	2.98154	17.7069
0	0	0.0307966	0.0725201	0.12065	0.149512	0.178188	0.211588	0.246094	0.246094	0.25496	0.348029	0.434774	0.500232	0.55445	0.635623	0.701539	0.778217	0.828254	0.909612	0.984375	1.09227	1.23047	1.38493	1.55643	1.81222	2.22847	2.98618	18.0101
0	0	0.033085	0.0730778	0.120729	0.149613	0.18047	0.212467	0.246094	0.246094	0.259773	0.348029	0.442688	0.500635	0.556731	0.635751	0.705369	0.778217	0.864581	0.911061	0.984375	1.09264	1.23047	1.39212	1.56032	1.81376	2.26712	2.98981	18.7386
0	0	0.0345409	0.0734709	0.121548	0.151125	0.181606	0.215637	0.246094	0.246094	0.269327	0.348029	0.446242	0.500822	0.558356	0.636639	0.706057	0.778217	0.866445	0.911718	0.984375	1.09677	1.23047	1.39212	1.56734	1.81419	2.29046	3.00623	18.796
0	0	0.0351974	0.0739619	0.122178	0.152002	0.18217	0.218305	0.246094	0.246094	0.271412	0.348029	0.451349	0.502697	0.558817	0.640741	0.712087	0.778217	0.868332	0.920679	0.984375	1.10055	1.23047	1.39212	1.57577	1.81626	2.30895	3.01421	19.1849
0	0	0.036309	0.0743741	0.124436	0.153	0.183688	0.219328	0.246094	0.246094	0.272716	0.348029	0.455007	0.503087	0.559807	0.642542	0.715156	0.778217	0.881223	0.92201	0.984375	1.10056	1.23047	1.39946	1.57577	1.82898	2.30914	3.02928	19.3205
0	0	0.0373668	0.0747806	0.124691	0.155545	0.183986	0.21993	0.246094	0.246094	0.273886	0.348029	0.456188	0.503232	0.559881	0.646098	0.716318	0.778217	0.884146	0.922699	0.984375	1.10056	1.23047	1.40523	1.58467	1.83765	2.32133	3.05739	20.2908
0	0	0.0385663	0.0751221	0.127767	0.155756	0.185558	0.220034	0.246094	0.246094	0.277087	0.348029	0.457713	0.505095	0.560199	0.648177	0.716626	0.779614	0.885061	0.923704	0.984375	1.10056	1.23127	1.41396	1.62339	1.86257	2.32164	3.08043	21.2952
0	0	0.0390191	0.077396	0.12913	0.156407	0.186232	0.221116	0.246094	0.246094	0.286249	0.348029	0.462177	0.50578	0.563743	0.650292	0.719191	0.78291	0.885114	0.923887	1.01467	1.10056	1.24182	1.43054	1.64043	1.87419	2.32164	3.11287	21.8565
0	0	0.0412418	0.0789485	0.130616	0.156528	0.186604	0.221323	0.246094	0.247026	0.286678	0.348029	0.463697	0.510767	0.570415	0.672138	0.725436	0.784393	0.887304	0.930467	1.01467	1.10912	1.24301	1.43134	1.65085	1.89572	2.33864	3.18877	22.1908
0	0	0.0431249	0.0792029	0.131675	0.158347	0.187133	0.222545	0.246094	0.248047	0.28705	0.348029	0.466074	0.510908	0.571851	0.672379	0.728601	0.790396	0.887304	0.932122	1.01467	1.12304	1.24658	1.43496	1.65085	1.90019	2.34553	3.24507	22.3911
0	0	0.0432287	0.0802059	0.132037	0.158657	0.187352	0.222872	0.246094	0.248047	0.288021	0.348029	0.467726	0.511125	0.576328	0.677444	0.728654	0.797377	0.887304	0.950021	1.01467	1.12391	1.25171	1.43496	1.6517	1.91448	2.36916	3.31409	23.2907
0	0	0.0439238	0.08023	0.133183	0.158715	0.189464	0.224966	0.246094	0.24869	0.293853	0.348029	0.472792	0.51146	0.579521	0.679891	0.736229	0.798764	0.891595	0.960794	1.01467	1.16169	1.25484	1.43496	1.65477	1.91766	2.37894	3.46916	23.3413
0	0	0.0447662	0.080884	0.134508	0.158942	0.190908	0.227958	0.246094	0.25004	0.295499	0.349089	0.47855	0.5138	0.580376	0.679938	0.737115	0.801108	0.898044	0.96245	1.01467	1.16329	1.25484	1.44136	1.66292	1.92112	2.38081	3.47763	23.9967
0	0	0.0464029	0.0815437	0.134632	0.159008	0.193906	0.229201	0.246094	0.251062	0.298843	0.350761	0.479521	0.51747	0.582018	0.680613	0.738281	0.804928	0.898285	0.962969	1.01467	1.18327	1.25484	1.44168	1.66408	1.93623	2.38469	3.51106	24.7709
0	0	0.0486166	0.0820116	0.13526	0.160424	0.195151	0.231798	0.246094	0.253115	0.302696	0.354349	0.480189	0.519115	0.582943	0.684293	0.738281	0.80556	0.900078	0.984375	1.01467	1.1929	1.26053	1.44773	1.66627	1.97808	2.42564	3.5289	24.8037
0	0	0.0489802	0.0836444	0.136797	0.160826	0.195598	0.231846	0.246094	0.255186	0.303677	0.364239	0.482821	0.519754	0.587598	0.68659	0.738281	0.807337	0.903486	0.984375	1.01667	1.19907	1.26073	1.44956	1.67326	1.98096	2.4481	3.53113	25.2131
0	0	0.0512527	0.0841318	0.137354	0.161495	0.197784	0.232064	0.246094	0.25728	0.306292	0.364445	0.482922	0.523163	0.589466	0.69209	0.738281	0.808108	0.904037	0.984375	1.02861	1.19989	1.28078	1.45812	1.68744	1.98407	2.45323	3.54409	26.0069
0	0	0.0516214	0.0878631	0.138667	0.162958	0.197802	0.232166	0.246094	0.258072	0.310432	0.366499	0.48372	0.526861	0.590802	0.695049	0.738281	0.815951	0.909881	0.984375	1.04409	1.20007	1.28229	1.46668	1.69387	1.98407	2.46094	3.60443	26.9373
0	0	0.0518588	0.0880027	0.139587	0.16651	0.197983	0.232434	0.246094	0.259924	0.311922	0.369981	0.484197	0.527292	0.595386	0.696058	0.738281	0.818219	0.911556	0.984375	1.04861	1.20447	1.29455	1.46737	1.69743	2.00853	2.46094	3.79115	28.1141
0	0	0.0536769	0.0886782	0.13967	0.166986	0.19904	0.232678	0.246094	0.261009	0.313467	0.370566	0.484233	0.527584	0.596332	0.696058	0.743836	0.820258	0.917544	0.984375	1.04883	1.20478	1.29858	1.47146	1.70272	2.00914	2.48112	3.85284	28.1291
0	0	0.0538673	0.089453	0.140363	0.167717	0.199959	0.233232	0.246094	0.262659	0.316949	0.376104	0.484407	0.52818	0.597385	0.700152	0.744731	0.828068	0.919012	0.984375	1.05125	1.20534	1.30489	1.47656	1.70599	2.01417	2.49753	3.89734	28.1895
0	0	0.0566188	0.0901402	0.140779	0.167758	0.201361	0.234703	0.246094	0.263053	0.317829	0.380392	0.484801	0.531269	0.598245	0.701087	0.745385	0.830387	0.92399	0.984375	1.05391	1.20996	1.30778	1.47656	1.71434	2.02317	2.50876	4.00612	29.6271
0	0	0.0571416	0.0905558	0.141051	0.1679	0.203414	0.234833	0.246094	0.266506	0.322741	0.383157	0.48499	0.532632	0.605547	0.701264	0.745895	0.830403	0.924125	0.984375	1.05786	1.22303	1.32526	1.47656	1.7183	2.02934	2.50896	4.10975	29.6404
0	0	0.0575156	0.0906006	0.141526	0.167967	0.204477	0.237482	0.246094	0.267881	0.323312	0.383681	0.486292	0.535804	0.606351	0.704888	0.752463	0.832248	0.9263	0.984375	1.06496	1.22859	1.32526	1.47669	1.72266	2.0449	2.50967	4.16386	29.8092
0	0	0.059391	0.0910856	0.141726	0.168563	0.205912	0.238301	0.246094	0.271061	0.324399	0.384189	0.487737	0.536344	0.611182	0.70598	0.762561	0.832831	0.931393	0.984375	1.06605	1.23047	1.32526	1.48501	1.73202	2.0704	2.51083	4.26756	29.8286
0	0	0.0605937	0.0925853	0.142196	0.171944	0.206846	0.24137	0.246094	0.271885	0.327968	0.386476	0.488508	0.537858	0.614495	0.706274	0.76399	0.851855	0.935495	0.988269	1.07033	1.23047	1.32526	1.48704	1.73687	2.09228	2.52719	4.38157	30.4116
0	0	0.0608684	0.0933978	0.142467	0.172267	0.206901	0.241965	0.246094	0.273789	0.337145	0.39935	0.490453	0.539384	0.617882	0.706833	0.769449	0.853814	0.936979	0.996873	1.07513	1.23047	1.32526	1.48879	1.74015	2.10145	2.56128	5.11362	30.5315
0	0	0.0616365	0.0945155	0.14285	0.173088	0.207365	0.242245	0.246094	0.274301	0.33988	0.399603	0.49101	0.541116	0.619664	0.709389	0.771204	0.855647	0.942156	1.01321	1.08215	1.23047	1.32526	1.50172	1.74015	2.10263	2.59071	5.43019	31.165
0	0	0.0619796	0.0946814	0.143494	0.174396	0.208562	0.242794	0.246094	0.275069	0.341499	0.400059	0.492188	0.541907	0.620324	0.713748	0.771736	0.860497	0.948113	1.01467	1.08481	1.23047	1.32526	1.50304	1.74015	2.10263	2.61891	5.70824	31.4548
0	0	0.0649562	0.0947641	0.143687	0.174988	0.21109	0.24327	0.246094	0.276236	0.343003	0.406198	0.492188	0.546343	0.624375	0.714244	0.771861	0.86102	0.969807	1.01467	1.10056	1.23047	1.32526	1.512	1.74404	2.11343	2.65928	5.75871	32.9754
0	0	0.0650294	0.0951599	0.144113	0.176549	0.211537	0.244998	0.246094	0.276303	0.343832	0.408615	0.492188	0.547106	0.62444	0.715018	0.774629	0.861287	0.970793	1.01467	1.10056	1.23047	1.34109	1.51999	1.76025	2.11426	2.70263	5.79953	33.1597
0	0	0.0661496	0.0958093	0.144142	0.176659	0.212547	0.245796	0.246094	0.277006	0.343874	0.411005	0.492188	0.547609	0.628687	0.718766	0.778217	0.870677	0.977888	1.01467	1.10056	1.23047	1.34174	1.5249	1.76301	2.11698	2.70703	6.02225	34.9972
0	0.00436946	0.0668022	0.0971105	0.144752	0.177796	0.214395	0.246094	0.246094	0.279843	0.344165	0.413532	0.492188	0.550213	0.633213	0.722608	0.778217	0.878563	0.984375	1.01467	1.10056	1.23047	1.34522	1.54551	1.77318	2.11698	2.73181	6.0624	35.8133
0	0.0059573	0.0668299	0.0973948	0.145665	0.177931	0.215656	0.246094	0.246094	0.282939	0.348029	0.421319	0.492188	0.550282	0.638334	0.723994	0.778217	0.879286	0.984375	1.01467	1.10056	1.23047	1.36318	1.54649	1.77461	2.13611	2.73893	6.20117	35.9054
0	0.00635213	0.0669182	0.0974929	0.14568	0.179273	0.21632	0.246094	0.246094	0.286282	0.348029	0.424205	0.492188	0.550282	0.639525	0.731379	0.778217	0.880049	0.984375	1.01467	1.10906	1.23047	1.3651	1.55643	1.77461	2.20027	2.75141	6.23511	38.2758
0	0.0098714	0.0682031	0.0991761	0.145698	0.179811	0.216929	0.246094	0.246094	0.286351	0.348029	0.424753	0.492188	0.550282	0.643447	0.735919	0.778217	0.880223	0.984375	1.01467	1.11796	1.23047	1.36681	1.55643	1.77461	2.20113	2.78061	7.19523	38.3973
0	0.0108574	0.0685151	0.0994311	0.145778	0.179893	0.217051	0.246094	0.246094	0.29502	0.348029	0.424976	0.492188	0.550282	0.644956	0.737755	0.778217	0.88599	0.984375	1.01467	1.12192	1.23047	1.36869	1.55643	1.78876	2.20113	2.78139	7.63933	39.1989
0	0.0111919	0.0687712	0.0997631	0.14629	0.180088	0.223478	0.246094	0.246094	0.297369	0.348029	0.42532	0.492188	0.550282	0.646131	0.738281	0.778217	0.886726	0.984375	1.01467	1.12219	1.23135	1.39212	1.56614	1.79159	2.21137	2.78615	7.80762	39.6641
0	0.0119735	0.0689117	0.100149	0.149388	0.180805	0.223542	0.246094	0.246094	0.298267	0.348029	0.426392	0.492188	0.550282	0.655448	0.738281	0.778217	0.887304	0.984375	1.01604	1.12266	1.23311	1.39212	1.57049	1.79954	2.21259	2.84539	9.19974	40.3323
0	0.0141809	0.069091	0.101122	0.149842	0.183239	0.226413	0.246094	0.246094	0.298811	0.348029	0.42791	0.492188	0.550282	0.657827	0.738281	0.778217	0.887304	0.984375	1.038	1.1246	1.24906	1.39212	1.57577	1.80159	2.21484	2.86807	9.90304	40.5108
0	0.0146962	0.0699333	0.101899	0.151569	0.186416	0.227169	0.246094	0.246094	0.301012	0.348029	0.427998	0.492188	0.550282	0.658942	0.738281	0.778217	0.887304	0.984375	1.03852	1.12622	1.2504	1.39212	1.57577	1.80909	2.21484	2.88045	10.6847	41.208
0	0.0165341	0.0722562	0.102482	0.151939	0.187799	0.227941	0.246094	0.246094	0.301501	0.348029	0.430827	0.492188	0.550282	0.660518	0.738281	0.784393	0.887304	0.984375	1.04004	1.14414	1.25484	1.40199	1.57577	1.84014	2.21484	2.88345	11.4163	42.149
0	0.0183604	0.073886	0.103909	0.15195	0.18868	0.22871	0.246094	0.246094	0.301742	0.348029	0.437334	0.492188	0.550282	0.662025	0.738281	0.784539	0.89368	0.984375	1.04401	1.14601	1.25484	1.40586	1.57632	1.87419	2.21484	2.9284	11.4837	42.8335
0	0.0190405	0.0750643	0.10425	0.152125	0.189582	0.228787	0.246094	0.246094	0.307013	0.348029	0.438338	0.492188	0.551214	0.66235	0.738281	0.787882	0.894983	0.984375	1.04409	1.14759	1.25484	1.4098	1.58662	1.87751	2.22059	2.93425	11.4901	42.9443
0	0.0205698	0.0758988	0.106285	0.152642	0.191956	0.229084	0.246094	0.246094	0.307325	0.348029	0.438566	0.492188	0.558609	0.665464	0.738281	0.791388	0.896789	0.984375	1.04926	1.15394	1.25484	1.41426	1.60645	1.88108	2.222	2.94063	11.6082	42.9756
0	0.0224516	0.0760255	0.106333	0.152837	0.192077	0.229378	0.246094	0.246094	0.308125	0.348029	0.438972	0.492188	0.560699	0.667558	0.740004	0.792228	0.897903	0.984375	1.04934	1.15439	1.25484	1.41995	1.61415	1.88173	2.22847	2.97913	12.336	43.163
0	0.0236877	0.0761915	0.106489	0.153876	0.192416	0.231948	0.246094	0.246094	0.30885	0.348029	0.439221	0.49407	0.561236	0.669342	0.741561	0.793	0.898202	0.985812	1.04965	1.16322	1.25696	1.43168	1.63601	1.91314	2.25316	2.98121	12.5604	44.249
0	0.0247596	0.0765996	0.107306	0.155591	0.193294	0.23218	0.246094	0.246094	0.309396	0.34952	0.441903	0.496094	0.561467	0.669579	0.746534	0.798181	0.901472	0.989304	1.05302	1.16459	1.26287	1.43496	1.63938	1.92735	2.25502	2.98557	13.0453	44.5287
0	0.0257533	0.0767548	0.107858	0.155866	0.193662	0.232396	0.246094	0.246094	0.31228	0.350791	0.442376	0.496637	0.56177	0.669853	0.746771	0.799988	0.901577	0.990752	1.06715	1.16999	1.26979	1.43496	1.64795	1.93384	2.2611	2.99538	13.617	44.9978
0	0.0266521	0.0769814	0.108085	0.156425	0.196567	0.232415	0.246094	0.246094	0.312733	0.353332	0.442387	0.498463	0.563433	0.670777	0.748722	0.801536	0.909313	0.993859	1.06765	1.17952	1.27231	1.43496	1.65085	1.93584	2.27459	2.99838	14.2627	46.3745
0	0.0269475	0.0776004	0.108849	0.156715	0.196588	0.232484	0.246094	0.246094	0.31292	0.355344	0.444501	0.499904	0.564015	0.673746	0.749302	0.808248	0.915971	1.0003	1.07723	1.18208	1.27507	1.43496	1.65085	1.94169	2.27814	3.00857	14.3253	46.8096
0	0.0282496	0.0786037	0.109245	0.156919	0.196978	0.232734	0.246094	0.246094	0.313597	0.357053	0.444519	0.502371	0.568233	0.674783	0.750874	0.808344	0.920774	1.00054	1.07941	1.18887	1.28229	1.43496	1.65085	1.94255	2.29496	3.01166	14.5203	47.6581
0	0.0295354	0.0787486	0.109513	0.158691	0.197897	0.233177	0.246094	0.246094	0.313651	0.358995	0.451795	0.502609	0.568528	0.675485	0.75259	0.808974	0.925905	1.00083	1.08213	1.19653	1.30013	1.43496	1.65221	1.97785	2.32164	3.04317	14.5497	47.7351
0	0.0311608	0.0793073	0.110194	0.158808	0.199021	0.233632	0.246094	0.246094	0.314204	0.359994	0.452178	0.505378	0.569996	0.675692	0.75382	0.812753	0.926052	1.00568	1.08796	1.20342	1.30312	1.45662	1.65623	1.97938	2.34699	3.0544	14.8435	48.9881
0	0.0342437	0.0802237	0.110547	0.161454	0.199515	0.235437	0.246094	0.246094	0.315554	0.366792	0.452391	0.507961	0.571373	0.682408	0.75549	0.814659	0.928054	1.00573	1.09103	1.21048	1.30968	1.45779	1.66377	1.98407	2.39354	3.16386	15.0093	49.1907
0	0.0343979	0.0811143	0.110648	0.163712	0.2023	0.236104	0.246094	0.248047	0.316001	0.367574	0.453812	0.513241	0.571748	0.683152	0.761609	0.823776	0.931045	1.00816	1.09128	1.2182	1.30979	1.46328	1.67515	1.98407	2.39787	3.17507	15.3328	49.2376
0	0.035632	0.0824183	0.110907	0.164968	0.202472	0.236724	0.246094	0.248047	0.322385	0.371965	0.45519	0.514949	0.572338	0.691319	0.762617	0.825283	0.934548	1.0094	1.0952	1.21904	1.31125	1.4638	1.67675	1.98844	2.41936	3.19241	15.5401	50.5092
0	0.036186	0.083473	0.111008	0.165011	0.203032	0.238452	0.246094	0.248047	0.323634	0.373343	0.45647	0.515179	0.575249	0.693066	0.764395	0.83741	0.937523	1.01264	1.10056	1.22062	1.32365	1.47178	1.67888	2.01177	2.42331	3.21536	16.2106	51.5739
0	0.0387113	0.0845937	0.111707	0.165494	0.203116	0.240561	0.246094	0.248047	0.325224	0.377225	0.460745	0.52133	0.578632	0.694733	0.767376	0.84203	0.938422	1.01467	1.10056	1.22125	1.32526	1.47465	1.69748	2.01438	2.42374	3.23908	16.2897	51.7084
0	0.0400377	0.0849706	0.112192	0.165754	0.204682	0.242165	0.246094	0.248047	0.327848	0.378513	0.46266	0.522069	0.578762	0.694785	0.771936	0.842088	0.951856	1.01467	1.10056	1.22934	1.32526	1.47656	1.70971	2.02039	2.43553	3.34952	16.623	51.9231
0	0.0404321	0.0850436	0.113552	0.167054	0.205218	0.242171	0.246094	0.249115	0.328219	0.379953	0.462755	0.524395	0.581034	0.696058	0.778217	0.849649	0.958627	1.01467	1.10056	1.22942	1.32526	1.47656	1.7179	2.02474	2.46094	3.55907	16.8404	52.995
0	0.0410894	0.0854882	0.114177	0.168649	0.206301	0.242356	0.246094	0.24923	0.331206	0.380244	0.463041	0.524524	0.581262	0.696058	0.778217	0.851946	0.962581	1.01467	1.10056	1.23047	1.32526	1.48046	1.72266	2.0254	2.46376	3.57626	17.226	53.1217
0	0.0412268	0.0855518	0.114381	0.169686	0.208747	0.243572	0.246094	0.249986	0.331768	0.381215	0.46342	0.525427	0.582089	0.696058	0.778217	0.860306	0.965366	1.01467	1.10239	1.23047	1.32526	1.48451	1.73858	2.02934	2.48399	3.66237	17.4851	53.4836
0	0.0412268	0.0866712	0.115177	0.170046	0.210132	0.243656	0.246094	0.250882	0.333069	0.381339	0.464486	0.527222	0.58665	0.696058	0.778217	0.862678	0.971459	1.01467	1.10743	1.23047	1.32526	1.48569	1.73899	2.02934	2.50745	3.67695	17.8288	53.9375
0	0.0415718	0.08697	0.115404	0.1704	0.212605	0.243816	0.246094	0.252316	0.33425	0.381382	0.471241	0.530058	0.591608	0.696058	0.778217	0.864809	0.971773	1.01467	1.10823	1.23047	1.32526	1.49363	1.74015	2.03086	2.56739	3.76874	18.3535	55.948
0	0.0427759	0.0873823	0.116658	0.170864	0.213188	0.243983	0.246094	0.253456	0.336881	0.381997	0.471715	0.532002	0.594897	0.696058	0.778217	0.86529	0.979704	1.01467	1.11004	1.23047	1.33514	1.49693	1.74015	2.04624	2.56929	3.83336	18.3834	56.3803
0	0.042821	0.0879837	0.117573	0.173193	0.216216	0.244558	0.246094	0.253568	0.33772	0.383213	0.472413	0.532803	0.597828	0.696058	0.778217	0.868465	0.980175	1.01467	1.11205	1.23047	1.35023	1.49977	1.74015	2.05785	2.57867	3.85729	19.0427	56.4818
0	0.0429661	0.0880583	0.118146	0.173259	0.216818	0.246094	0.246094	0.253735	0.338306	0.383746	0.475144	0.535367	0.597891	0.699195	0.778217	0.868555	0.98023	1.01467	1.11801	1.23047	1.36054	1.52408	1.74666	2.06583	2.60027	3.9362	19.0905	57.2559
0	0.0433267	0.0895134	0.118523	0.173583	0.217134	0.246094	0.246094	0.254391	0.338722	0.384761	0.47727	0.536114	0.599552	0.700535	0.778217	0.869854	0.984375	1.0206	1.11818	1.23047	1.36228	1.52525	1.7504	2.08367	2.60221	3.98139	20.1896	57.5062
0	0.0437425	0.0901432	0.118608	0.174219	0.21994	0.246094	0.246094	0.254921	0.339235	0.38624	0.478137	0.539717	0.604119	0.700944	0.779531	0.870197	0.984375	1.02475	1.11885	1.23047	1.36466	1.53315	1.76142	2.0901	2.61609	4.0857	20.3679	58.1325
0	0.0443199	0.0902208	0.118986	0.174267	0.221066	0.246094	0.246094	0.258764	0.34206	0.387897	0.480824	0.539883	0.60493	0.70118	0.780103	0.872114	0.984375	1.02523	1.12183	1.23047	1.36861	1.53644	1.76357	2.10263	2.66619	4.12618	21.5367	58.2176
0	0.046463	0.0902404	0.120028	0.174884	0.221071	0.246094	0.246094	0.262945	0.342932	0.389433	0.481214	0.5409	0.607031	0.702776	0.784305	0.872219	0.984375	1.02729	1.12703	1.23047	1.38085	1.5473	1.76531	2.10263	2.7028	4.22441	21.5724	58.2627
0	0.0465374	0.0911963	0.120325	0.175067	0.221233	0.246094	0.246094	0.266581	0.345204	0.390315	0.481458	0.541769	0.607609	0.70397	0.784393	0.873598	0.984375	1.03167	1.13134	1.23047	1.38925	1.54961	1.77461	2.10633	2.70703	4.26756	21.7966	58.31
0	0.0469672	0.09166	0.120454	0.175231	0.221395	0.246094	0.246094	0.267697	0.347952	0.391176	0.482347	0.544883	0.609452	0.704147	0.784393	0.874239	0.984375	1.03205	1.13151	1.23232	1.39006	1.55643	1.77461	2.11255	2.70825	4.37667	21.8772	58.7709
0	0.0470015	0.0929055	0.121257	0.176973	0.22266	0.246094	0.246094	0.267991	0.348	0.394135	0.482728	0.547231	0.610377	0.704892	0.785852	0.877	0.984375	1.0337	1.1368	1.23432	1.39212	1.55643	1.79159	2.11698	2.72024	4.52275	22.4652	59.9877
0	0.0474919	0.0930099	0.12127	0.178759	0.223066	0.246094	0.246094	0.26858	0.348029	0.396029	0.484957	0.547805	0.611561	0.706765	0.786124	0.878048	0.984375	1.0354	1.14388	1.24309	1.39212	1.55643	1.79166	2.1222	2.75069	5.00281	22.9962	60.3901
0	0.0484101	0.093829	0.12223	0.17896	0.223442	0.246094	0.246094	0.268728	0.348029	0.396592	0.485349	0.548195	0.614485	0.7247	0.786357	0.882227	0.984375	1.03888	1.15366	1.25084	1.39795	1.56265	1.80673	2.15173	2.75141	5.11362	23.2349	60.5886
0	0.0491575	0.0943481	0.123243	0.179516	0.224033	0.246094	0.246094	0.269891	0.348029	0.396838	0.489716	0.548694	0.615894	0.724983	0.793791	0.882531	0.984375	1.04238	1.16503	1.25304	1.40451	1.56386	1.82132	2.16476	2.75141	5.15135	23.3346	60.9323
0	0.0498682	0.0946349	0.123317	0.17955	0.225054	0.246094	0.246094	0.270745	0.348029	0.396882	0.49204	0.550282	0.620276	0.728087	0.798959	0.887304	0.984375	1.04382	1.16742	1.25484	1.406	1.5686	1.82799	2.20113	2.75377	5.21097	24.0178	61.2012
0	0.0498886	0.0949703	0.12464	0.180716	0.225683	0.246094	0.246094	0.270812	0.348029	0.398559	0.492188	0.550282	0.623191	0.728289	0.813993	0.89137	0.984375	1.04409	1.16976	1.25484	1.40627	1.57488	1.84591	2.21484	2.75927	5.23098	24.0682	64.3319
0	0.0499458	0.0952418	0.125056	0.181069	0.226496	0.246094	0.246094	0.270876	0.348029	0.399575	0.492188	0.550282	0.63643	0.729189	0.817763	0.892893	0.984375	1.05585	1.18357	1.25484	1.41298	1.57577	1.86502	2.21484	2.7972	5.39649	24.1584	64.9902
0	0.0501512	0.0960657	0.125294	0.181879	0.226721	0.246094	0.246094	0.275408	0.348029	0.39996	0.492188	0.550282	0.637456	0.730919	0.823418	0.894999	0.984375	1.06616	1.1844	1.25484	1.41501	1.57964	1.86512	2.21484	2.8016	5.68505	25.1314	65.2382
0	0.0508618	0.0971527	0.126064	0.182659	0.22677	0.246094	0.246094	0.27915	0.348029	0.402283	0.492188	0.550282	0.638318	0.73155	0.824073	0.895333	0.984375	1.07699	1.18624	1.25798	1.41997	1.58079	1.87419	2.22847	2.80566	5.9683	25.7387	65.3353
0	0.0510655	0.0976745	0.126088	0.183831	0.227548	0.246094	0.246094	0.280293	0.348029	0.402435	0.492188	0.550282	0.638655	0.733574	0.825284	0.899414	0.988377	1.07822	1.18757	1.26178	1.42194	1.58642	1.88535	2.23869	2.82241	5.99375	25.9042	65.3742
0	0.0514808	0.0978111	0.127405	0.184056	0.228392	0.246094	0.246094	0.282946	0.348029	0.404201	0.492188	0.550282	0.638782	0.733615	0.827048	0.902848	0.989989	1.0796	1.18849	1.26399	1.42611	1.5929	1.89278	2.25347	2.85351	6.10769	26.4215	65.9586
0	0.0522747	0.0979912	0.129429	0.184196	0.230501	0.246094	0.246094	0.284626	0.348029	0.404925	0.492188	0.550282	0.639218	0.738281	0.829233	0.90327	0.991399	1.08224	1.18963	1.26865	1.42706	1.59352	1.89986	2.26505	2.86013	6.1126	26.4448	67.3768
0	0.0534535	0.098586	0.129607	0.185133	0.231736	0.246094	0.246094	0.285142	0.348029	0.405058	0.492188	0.550282	0.642021	0.738281	0.830565	0.903338	0.992074	1.08667	1.19073	1.27028	1.42909	1.5969	1.90064	2.26887	2.86586	6.1303	27.4151	69.7799
0	0.0541076	0.099161	0.129708	0.185571	0.2324	0.246094	0.246094	0.285652	0.348029	0.407225	0.492188	0.550282	0.646399	0.738281	0.832165	0.905891	0.994457	1.09011	1.19301	1.2724	1.43068	1.62283	1.9023	2.27479	2.87013	6.20117	27.8129	71.38
0	0.054633	0.0995142	0.129754	0.185802	0.232553	0.246094	0.246094	0.285966	0.348029	0.408821	0.492188	0.550282	0.64701	0.738281	0.835418	0.907014	0.994859	1.0927	1.19674	1.28329	1.43496	1.63404	1.91492	2.27794	2.91479	7.90462	27.8706	71.471
0	0.0551004	0.100364	0.130343	0.186167	0.232658	0.246094	0.246094	0.291249	0.348029	0.410413	0.492188	0.550282	0.648482	0.738281	0.835446	0.920034	1.00154	1.09459	1.21698	1.28638	1.43496	1.63689	1.92205	2.28244	2.93958	7.95261	28.641	74.6404
0	0.0553143	0.100556	0.130693	0.186204	0.232773	0.246094	0.246094	0.292627	0.348029	0.414609	0.492188	0.550282	0.649545	0.738281	0.840009	0.920909	1.00388	1.09652	1.21772	1.28707	1.43496	1.64884	1.92249	2.28823	2.9489	8.51621	28.7801	75.0583
0	0.0570038	0.101113	0.131369	0.186348	0.235142	0.246094	0.246094	0.29324	0.348029	0.421149	0.492188	0.550282	0.650817	0.738281	0.840731	0.923064	1.01009	1.09867	1.22185	1.28843	1.43496	1.65085	1.92977	2.30395	2.95118	9.1386	29.3578	75.2854
0	0.0572454	0.101705	0.13214	0.186396	0.235279	0.246094	0.246094	0.295629	0.348029	0.425095	0.492188	0.550282	0.651406	0.738281	0.841501	0.926683	1.01045	1.09878	1.22409	1.29184	1.43697	1.65085	1.93811	2.31263	2.96808	9.47611	29.4744	77.108
0	0.0575862	0.102076	0.132311	0.186492	0.235392	0.246094	0.246094	0.296364	0.348029	0.426519	0.492188	0.550282	0.653924	0.738281	0.84639	0.934545	1.0132	1.10056	1.22424	1.32526	1.4493	1.66031	1.93948	2.33465	2.98191	9.97931	29.6324	78.2088
0	0.0576159	0.102141	0.133058	0.187154	0.235432	0.246094	0.246094	0.296718	0.348029	0.426612	0.492188	0.550282	0.655723	0.738281	0.846484	0.94059	1.01455	1.10056	1.22487	1.32526	1.45324	1.6604	1.9512	2.34171	3.0056	10.114	29.6417	78.3345
0	0.0578018	0.103019	0.135159	0.188009	0.235448	0.246094	0.246094	0.296939	0.348029	0.427001	0.492188	0.550282	0.656387	0.738281	0.854008	0.943327	1.01467	1.10056	1.22567	1.32526	1.46117	1.67031	1.98407	2.40762	3.02694	10.6277	30.0712	78.6179
0	0.057888	0.103192	0.135814	0.18807	0.236129	0.246094	0.246094	0.297117	0.348029	0.427685	0.492188	0.550781	0.661245	0.739793	0.855325	0.947085	1.01467	1.10056	1.22795	1.32526	1.46387	1.67146	1.98407	2.4198	3.03818	10.7527	30.6548	82.9302
0	0.0584084	0.103568	0.137486	0.188421	0.237317	0.246094	0.246094	0.298132	0.348029	0.428308	0.492188	0.551055	0.663305	0.744001	0.861349	0.94863	1.01467	1.10056	1.23047	1.32526	1.4763	1.67423	1.98407	2.42156	3.06673	11.0279	30.7291	84.9788
0	0.0584422	0.103746	0.137643	0.188619	0.237557	0.246094	0.246094	0.300058	0.348029	0.42999	0.492188	0.551499	0.667167	0.744621	0.870914	0.949056	1.01467	1.10056	1.23047	1.32526	1.48257	1.67465	1.98456	2.44683	3.07996	11.293	31.1832	85.2314
0	0.0599257	0.103753	0.138894	0.189166	0.238204	0.246094	0.246094	0.300193	0.348029	0.43031	0.495567	0.552343	0.667457	0.74677	0.88358	0.951375	1.01467	1.10347	1.23047	1.32526	1.48421	1.67558	1.98839	2.45746	3.12556	11.3289	31.2591	85.6927
0	0.0604823	0.10386	0.139454	0.18964	0.238389	0.246094	0.246094	0.300264	0.348029	0.430982	0.496094	0.553403	0.672945	0.749736	0.887304	0.951999	1.01467	1.1093	1.23047	1.33099	1.48477	1.67782	2.00297	2.45852	3.17557	11.331	31.3207	87.5554
0	0.0607698	0.103861	0.139648	0.189875	0.23872	0.246094	0.246094	0.303372	0.348029	0.43118	0.500503	0.554387	0.679373	0.74984	0.887304	0.952248	1.01467	1.11109	1.23047	1.33302	1.49082	1.7105	2.02399	2.46094	3.19389	11.58	32.4851	88.3261
0	0.0608008	0.104018	0.139883	0.190352	0.239538	0.246094	0.246094	0.303606	0.348029	0.433067	0.502408	0.555774	0.690126	0.752829	0.887304	0.955689	1.01467	1.11139	1.23047	1.33561	1.49693	1.71361	2.02868	2.46298	3.20153	12.3047	32.6749	98.1726
0	0.0608286	0.104133	0.141125	0.191904	0.239949	0.246094	0.246094	0.304127	0.348029	0.435805	0.50313	0.557585	0.69067	0.75692	0.887304	0.956176	1.01467	1.11172	1.23047	1.33682	1.49693	1.71367	2.02909	2.49552	3.22461	12.7538	33.5337	103.697
0	0.0631272	0.104746	0.141908	0.192275	0.240252	0.246094	0.246094	0.309622	0.348029	0.437828	0.503306	0.558017	0.691501	0.757462	0.887304	0.956584	1.01467	1.11173	1.23047	1.34438	1.49693	1.71369	2.02934	2.50967	3.31751	12.7969	33.5753	112.229
0	0.0643027	0.104774	0.141967	0.193228	0.241032	0.246094	0.248047	0.309918	0.348029	0.438911	0.50349	0.559759	0.694062	0.76098	0.887304	0.956952	1.01891	1.11291	1.23047	1.34452	1.50491	1.72266	2.0313	2.51232	3.36525	13.2401	33.7358	114.61
0	0.0644129	0.105351	0.142204	0.194432	0.241946	0.246094	0.248047	0.310794	0.348029	0.439552	0.506081	0.560967	0.696058	0.761843	0.887689	0.957397	1.02007	1.1138	1.23047	1.34813	1.50594	1.74015	2.0332	2.56234	3.50844	13.351	34.766
0	0.0659983	0.105461	0.142413	0.196523	0.244303	0.246094	0.248047	0.311262	0.348029	0.439699	0.507797	0.56163	0.696058	0.762386	0.89416	0.961477	1.0213	1.12322	1.23049	1.34891	1.51791	1.74015	2.06479	2.60478	3.58589	13.9757	34.9033
0	0.0660853	0.105565	0.143827	0.196605	0.244317	0.246094	0.248391	0.312429	0.348399	0.43987	0.508272	0.573883	0.696058	0.762854	0.894768	0.964433	1.02262	1.13492	1.23393	1.36496	1.52725	1.74015	2.07068	2.61196	3.59539	14.0317	35.4581
0	0.0663227	0.106669	0.144079	0.197387	0.245118	0.246094	0.249024	0.313777	0.352072	0.442335	0.511333	0.578297	0.696058	0.763714	0.895258	0.966549	1.02437	1.1362	1.23414	1.37305	1.54158	1.74015	2.07292	2.62679	3.60416	14.0969	35.6046
0	0.0664482	0.106684	0.144209	0.197755	0.245271	0.246094	0.251632	0.314935	0.354196	0.442785	0.512007	0.580722	0.696058	0.768231	0.898335	0.971437	1.0276	1.13689	1.23804	1.37352	1.54419	1.74427	2.08525	2.63658	3.66237	14.1393	35.9528
0	0.0664687	0.109269	0.144295	0.198158	0.246094	0.246094	0.251707	0.315026	0.357251	0.443367	0.512634	0.583185	0.696058	0.76831	0.898885	0.974784	1.0277	1.14029	1.24771	1.38591	1.54477	1.7656	2.08817	2.63946	3.72388	14.4451	36.6908
0	0.0671182	0.109308	0.14463	0.198873	0.246094	0.246094	0.255088	0.315414	0.357353	0.44365	0.514113	0.583206	0.696702	0.769874	0.899188	0.975711	1.03307	1.15652	1.25082	1.38608	1.54815	1.77045	2.10449	2.65051	3.74173	14.5589	37.637
0	0.0677355	0.109548	0.146366	0.19947	0.246094	0.246094	0.255211	0.316938	0.357495	0.445074	0.516473	0.583628	0.696879	0.771244	0.900031	0.980947	1.04311	1.15875	1.25404	1.38771	1.55643	1.77308	2.10883	2.66468	3.76059	14.7179	37.7695
0	0.0682982	0.111136	0.146497	0.199655	0.246094	0.246094	0.256267	0.317024	0.358686	0.445674	0.518397	0.584926	0.697907	0.774155	0.900175	0.984375	1.04409	1.15985	1.25426	1.38922	1.55643	1.77363	2.12252	2.68234	3.79872	14.9681	38.5387
0	0.068734	0.111488	0.146504	0.199739	0.246094	0.246094	0.256342	0.317698	0.358951	0.447287	0.518562	0.586451	0.698449	0.77503	0.900296	0.984375	1.04409	1.16064	1.25484	1.39212	1.55643	1.77461	2.12711	2.69607	3.82186	15.0881	38.8361
0	0.0692414	0.111615	0.148603	0.200456	0.246094	0.246094	0.256362	0.319628	0.359619	0.448102	0.518838	0.588068	0.701854	0.778217	0.901449	0.984375	1.04409	1.16339	1.25484	1.39986	1.55643	1.77461	2.15831	2.70706	3.84702	15.2259	39.5804
0	0.0695558	0.111791	0.151678	0.200693	0.246094	0.246094	0.25752	0.321088	0.359811	0.450203	0.520074	0.59266	0.703168	0.778217	0.91067	0.984375	1.05101	1.16409	1.25484	1.4042	1.55643	1.77516	2.18846	2.72718	3.85769	15.3475	39.9347
0	0.0696058	0.112326	0.152389	0.200994	0.246094	0.246094	0.259778	0.321365	0.360204	0.450292	0.521326	0.593412	0.707017	0.778217	0.910806	0.984375	1.05137	1.16497	1.25484	1.40923	1.56212	1.77763	2.18922	2.74326	3.97494	15.5401	40.0868
0	0.0699579	0.112551	0.152889	0.202633	0.246094	0.246094	0.260373	0.32166	0.361452	0.454363	0.521848	0.594176	0.70753	0.778217	0.911795	0.984375	1.0534	1.16587	1.25484	1.41315	1.56753	1.79159	2.20113	2.75141	4.12333	15.719	40.2878
0	0.0699638	0.11267	0.153192	0.203408	0.246094	0.246094	0.261059	0.323039	0.362681	0.457127	0.525164	0.59449	0.707655	0.778217	0.912887	0.984375	1.05452	1.16606	1.25484	1.41436	1.56791	1.79315	2.21484	2.7541	4.26756	16.0498	40.8137
0	0.0700245	0.112763	0.153815	0.204558	0.246094	0.246094	0.26155	0.323357	0.36446	0.457836	0.526344	0.596193	0.707722	0.778217	0.913404	0.984375	1.05669	1.16797	1.25484	1.41514	1.57577	1.80165	2.21484	2.76746	4.31601	16.7608	41.0308
0	0.0702368	0.11395	0.153883	0.204823	0.246094	0.246094	0.262708	0.323415	0.365416	0.459036	0.526451	0.59783	0.707986	0.778217	0.91539	0.984375	1.06045	1.17018	1.25484	1.41625	1.57577	1.81107	2.22847	2.77494	4.82696	16.8136	41.3308
0	0.0703434	0.114055	0.156158	0.205674	0.246094	0.246094	0.263107	0.324592	0.368947	0.46065	0.53112	0.599343	0.709406	0.782925	0.915694	0.984375	1.06641	1.17233	1.26102	1.41867	1.57577	1.8123	2.26521	2.80329	4.91124	17.3758	41.3329
0	0.0709316	0.114217	0.158446	0.206445	0.246094	0.246094	0.268538	0.325765	0.371011	0.464097	0.531643	0.60368	0.711681	0.784393	0.916664	0.984375	1.06711	1.17618	1.26136	1.42188	1.58519	1.81276	2.26985	2.84666	5.1111	17.4984	41.3534
0	0.071318	0.115227	0.15879	0.20646	0.246094	0.246094	0.269473	0.326942	0.374251	0.464158	0.534826	0.609345	0.713984	0.785594	0.920023	0.984375	1.06891	1.18295	1.26243	1.42266	1.58684	1.82931	2.27321	2.8514	5.11362	17.5994	41.6638
0	0.0715	0.115411	0.15896	0.20711	0.246094	0.246094	0.26967	0.327121	0.374435	0.464609	0.535533	0.613502	0.714269	0.792999	0.922568	0.984375	1.07396	1.18472	1.27144	1.42648	1.59755	1.86358	2.27825	2.87669	5.28419	18.0042	42.2207
0	0.0717617	0.11621	0.15914	0.207132	0.246094	0.246094	0.270176	0.327268	0.376204	0.47055	0.536033	0.616032	0.714385	0.794354	0.924322	0.984375	1.07479	1.18591	1.30592	1.42828	1.60457	1.86533	2.31624	2.88196	5.38871	18.0607	42.8334
0	0.0719105	0.117552	0.15916	0.208808	0.246094	0.246094	0.27025	0.330902	0.377309	0.470762	0.53711	0.616877	0.716918	0.798688	0.926597	0.984375	1.07605	1.18903	1.30614	1.43078	1.60661	1.87419	2.32164	2.88403	5.43825	18.1019	42.8971
0	0.0719361	0.117693	0.159403	0.210351	0.246094	0.246094	0.270317	0.332074	0.377474	0.474084	0.537359	0.617025	0.717093	0.799505	0.92672	0.984375	1.0762	1.18992	1.31242	1.43254	1.61879	1.8752	2.33076	2.95312	5.47091	18.678	43.1197
0	0.0726316	0.118223	0.15973	0.211707	0.246094	0.246094	0.270631	0.335849	0.377564	0.474144	0.537719	0.619882	0.717415	0.802258	0.926835	0.984375	1.08183	1.20073	1.31845	1.43496	1.6202	1.88163	2.33465	2.96336	5.5759	18.8722	43.5412
0	0.0728672	0.118451	0.159898	0.212334	0.246094	0.246094	0.270722	0.33588	0.380868	0.476066	0.537719	0.622896	0.718885	0.808348	0.928324	0.987934	1.08978	1.20361	1.32502	1.43496	1.62293	1.89199	2.35209	2.98889	5.6071	19.2304	43.7152
0	0.0731048	0.119376	0.160823	0.212971	0.246094	0.246094	0.270786	0.33772	0.3814	0.476559	0.538647	0.625748	0.722774	0.810016	0.928702	0.988873	1.09487	1.2041	1.32526	1.43496	1.62641	1.92205	2.36867	2.99386	5.75681	19.5733	43.8254
0	0.0731807	0.120186	0.160996	0.213186	0.246094	0.246094	0.270986	0.339776	0.381519	0.478139	0.539975	0.628336	0.725058	0.810906	0.937194	0.99518	1.10056	1.20759	1.32526	1.43496	1.62936	1.92205	2.36925	2.9991	5.85834	20.7721	45.0011
0	0.0734656	0.12053	0.161708	0.214083	0.246094	0.246094	0.271346	0.340192	0.382198	0.478935	0.540048	0.629249	0.725343	0.811397	0.937727	0.997999	1.10056	1.20904	1.32526	1.43496	1.63399	1.92958	2.3776	3.00151	5.94392	21.0867	45.2053
0	0.0735266	0.121111	0.162465	0.216466	0.246094	0.246094	0.271808	0.341048	0.382499	0.481206	0.545623	0.629808	0.72717	0.812005	0.938643	1.00539	1.10206	1.20949	1.32526	1.43496	1.64256	1.93777	2.38057	3.00831	6.04381	21.278	45.7383
0	0.0738048	0.121804	0.162956	0.216728	0.246094	0.246094	0.272598	0.341177	0.385492	0.482805	0.548152	0.631268	0.728364	0.819396	0.939216	1.00834	1.10248	1.20955	1.32526	1.4364	1.64337	1.9417	2.38706	3.02452	6.05965	21.2808	45.7584
0	0.0741495	0.122273	0.163142	0.216844	0.246094	0.246094	0.275389	0.343828	0.389624	0.484008	0.548379	0.632171	0.730713	0.822156	0.939381	1.00887	1.10466	1.21188	1.32555	1.44677	1.65002	1.94395	2.38721	3.04365	6.14368	21.3783	46.0379
0	0.0742503	0.122685	0.163644	0.21741	0.246094	0.246094	0.278951	0.344356	0.391622	0.484224	0.549058	0.634257	0.731094	0.827148	0.941031	1.01467	1.10637	1.21863	1.3258	1.4508	1.65085	1.95583	2.39557	3.05329	6.19835	21.3808	46.7585
0	0.0747762	0.123151	0.164688	0.2182	0.246094	0.246094	0.281833	0.346558	0.39405	0.484794	0.549233	0.645407	0.737	0.82948	0.942584	1.01467	1.10732	1.22025	1.32605	1.46124	1.6581	1.96084	2.40764	3.06782	6.20117	21.4902	47.2963
0	0.0750187	0.123226	0.165165	0.218991	0.246094	0.246094	0.283674	0.348029	0.400793	0.486483	0.549264	0.647471	0.738281	0.830004	0.944462	1.01467	1.1093	1.22348	1.33053	1.46524	1.66341	1.96979	2.4237	3.06989	6.34554	21.5571	47.2969
0	0.0763903	0.123472	0.165338	0.219443	0.246094	0.246094	0.283733	0.348029	0.402642	0.489836	0.550282	0.649203	0.738281	0.830691	0.946657	1.01467	1.11306	1.22702	1.33121	1.46933	1.66625	1.98026	2.42491	3.07096	7.20531	22.7009	48.4486
0	0.0765993	0.124697	0.166113	0.220584	0.246094	0.246094	0.284361	0.348029	0.40281	0.490533	0.550282	0.649697	0.738281	0.83168	0.963979	1.01467	1.11755	1.23047	1.33638	1.47088	1.68225	1.98407	2.43309	3.13757	7.72807	23.4772	48.8196
0	0.0767458	0.125085	0.166135	0.220616	0.246094	0.246094	0.285677	0.348029	0.403154	0.491385	0.550282	0.651219	0.738281	0.836605	0.9648	1.01467	1.12504	1.23047	1.34421	1.47365	1.68397	1.98407	2.46094	3.17065	7.84346	23.5916	48.9751
0	0.0771064	0.125991	0.166389	0.221739	0.246094	0.246094	0.287423	0.348029	0.403515	0.49192	0.550282	0.65316	0.738281	0.840562	0.966912	1.01467	1.12617	1.23047	1.34737	1.48958	1.68897	1.98407	2.46094	3.19807	7.86249	23.6022	50.3057
0	0.0778283	0.127007	0.170181	0.222487	0.246094	0.246094	0.287485	0.348029	0.403889	0.492188	0.550282	0.653933	0.738281	0.843067	0.967898	1.01467	1.12715	1.23047	1.3521	1.49693	1.69614	1.99427	2.48941	3.22461	8.1674	23.9709	50.3422
0	0.0779848	0.12727	0.170866	0.222763	0.246094	0.246094	0.287834	0.348029	0.404025	0.492188	0.550282	0.654627	0.738281	0.843183	0.971074	1.01467	1.12837	1.23047	1.35767	1.49693	1.70115	1.99911	2.50069	3.25001	8.51704	24.4492	50.7153
0	0.0785086	0.127425	0.170954	0.224285	0.246094	0.246094	0.288174	0.348029	0.404813	0.492188	0.550282	0.656194	0.738281	0.848693	0.971227	1.01467	1.13528	1.23047	1.36119	1.49693	1.70154	2.01176	2.50779	3.26605	8.75062	24.688	50.9468
0	0.079056	0.12773	0.171455	0.226018	0.246094	0.246094	0.288178	0.348029	0.40506	0.492188	0.550282	0.656571	0.738281	0.85032	0.974416	1.01467	1.14112	1.23047	1.36123	1.49693	1.72266	2.01534	2.53126	3.30943	9.05043	25.007	51.603
0	0.0790881	0.12797	0.171851	0.22854	0.246094	0.246094	0.290188	0.348029	0.405288	0.492188	0.550282	0.658018	0.738281	0.855259	0.981286	1.01467	1.14231	1.23047	1.36853	1.49693	1.74015	2.01537	2.5561	3.33217	9.22923	25.1768	51.8939
0	0.0792483	0.128469	0.172402	0.228905	0.246094	0.246094	0.290316	0.348029	0.406035	0.492188	0.550282	0.658078	0.738281	0.857617	0.981816	1.01572	1.14312	1.23047	1.37024	1.49861	1.74015	2.01566	2.56929	3.34403	9.68409	25.6434	52.1021
0	0.0796573	0.129113	0.173215	0.229883	0.246094	0.246094	0.291417	0.348029	0.413349	0.492188	0.550282	0.658647	0.738281	0.857843	0.984332	1.01952	1.15317	1.23047	1.37615	1.50093	1.74015	2.0207	2.57419	3.35868	9.721	26.0343	52.9068
0	0.0798821	0.130052	0.173693	0.231165	0.246094	0.246094	0.293959	0.348029	0.41585	0.492188	0.550282	0.660532	0.738281	0.859784	0.984375	1.02301	1.1564	1.23047	1.37876	1.50397	1.74015	2.02653	2.5764	3.3706	9.89285	26.1066	53.0081
0	0.0799153	0.13043	0.174175	0.233819	0.246094	0.24753	0.295144	0.348029	0.416741	0.492188	0.550282	0.664673	0.738281	0.860903	0.984375	1.02304	1.15862	1.23151	1.37922	1.5045	1.74015	2.0322	2.6008	3.39656	9.9781	26.3228	53.2534
0	0.0803205	0.131655	0.174397	0.23531	0.246094	0.248047	0.296299	0.348029	0.418606	0.492188	0.550282	0.665732	0.73851	0.861164	0.984375	1.02319	1.16077	1.23516	1.37944	1.50666	1.74363	2.05135	2.6063	3.56906	10.1946	26.326	53.3992
0	0.0803491	0.132118	0.174398	0.23562	0.246094	0.248047	0.297087	0.348029	0.418914	0.492188	0.550282	0.666508	0.73898	0.867162	0.984375	1.02743	1.16108	1.25256	1.38168	1.51007	1.74962	2.07575	2.6105	3.60587	10.3476	27.7137	53.5298
0	0.0805961	0.13346	0.175585	0.236461	0.246094	0.248047	0.297293	0.348029	0.419275	0.492188	0.550282	0.666877	0.743309	0.873354	0.984375	1.02882	1.16154	1.25484	1.38506	1.52912	1.75391	2.08817	2.61108	3.64977	11.0742	27.7955	54.2004
0	0.0810782	0.134426	0.175621	0.236642	0.246094	0.248047	0.298483	0.348029	0.421575	0.492188	0.550282	0.667536	0.743665	0.873756	0.984375	1.0404	1.16311	1.25484	1.38508	1.53275	1.76937	2.11104	2.63461	3.66237	11.2243	27.928	54.5986
0	0.081613	0.134493	0.176483	0.23749	0.246094	0.248047	0.300511	0.348029	0.421578	0.492188	0.550282	0.668924	0.750245	0.879802	0.984375	1.04409	1.16399	1.25484	1.38512	1.54074	1.7701	2.11229	2.66593	3.68194	11.9215	28.0698	55.0575
0	0.0816529	0.13501	0.17768	0.238026	0.246094	0.248047	0.301604	0.348029	0.422835	0.492188	0.550282	0.671966	0.750313	0.880671	0.984375	1.04409	1.16425	1.25484	1.38729	1.54869	1.77129	2.1191	2.68102	3.74402	12.0322	28.1258	55.4677
0	0.0817065	0.135346	0.177998	0.238054	0.246094	0.248047	0.303104	0.348029	0.423486	0.492188	0.550282	0.675133	0.750519	0.882606	0.984375	1.04409	1.17152	1.25484	1.38912	1.55188	1.77299	2.12316	2.68725	3.77277	12.0611	28.5066	55.6671
0	0.0818902	0.135662	0.179024	0.238571	0.246094	0.249482	0.30349	0.348029	0.423868	0.492188	0.550574	0.67732	0.759667	0.882976	0.984375	1.04409	1.17251	1.25484	1.39148	1.55216	1.77461	2.14591	2.68963	3.82539	12.3047	28.8674	55.709
0	0.0832402	0.136516	0.179472	0.238614	0.246094	0.251549	0.303846	0.348029	0.424122	0.492188	0.552069	0.679055	0.761053	0.887304	0.984375	1.04547	1.17333	1.25484	1.39212	1.55643	1.77461	2.15027	2.71286	3.87002	12.7268	29.0529	55.8807
0	0.0834437	0.136645	0.180313	0.238885	0.246094	0.253746	0.304229	0.348029	0.427755	0.492188	0.552869	0.680918	0.76581	0.887304	0.984375	1.05279	1.17615	1.25484	1.39212	1.55643	1.77821	2.15815	2.71461	3.96191	13.2258	29.2228	56.0352
0	0.0835549	0.137241	0.180519	0.23897	0.246094	0.255756	0.304851	0.348029	0.428274	0.492188	0.553404	0.681134	0.765989	0.887304	0.984375	1.05306	1.17966	1.25484	1.39212	1.56041	1.78369	2.16152	2.71913	4.00959	13.2341	29.7035	56.487
0	0.0836901	0.137362	0.181359	0.23976	0.246094	0.256052	0.304965	0.348029	0.429088	0.492188	0.55465	0.681887	0.766272	0.887304	0.984375	1.05319	1.18596	1.27123	1.39212	1.56241	1.79164	2.16245	2.72625	4.07303	13.2979	29.7932	56.525
0	0.0836998	0.137646	0.181599	0.239919	0.246094	0.256187	0.305942	0.348029	0.430732	0.492188	0.561016	0.68417	0.769468	0.887304	0.984375	1.05431	1.18612	1.2714	1.40791	1.56535	1.79658	2.19084	2.74452	4.12927	13.317	30.3174	56.6471
0	0.0840996	0.137657	0.181693	0.239948	0.246094	0.256971	0.30705	0.348029	0.433352	0.493279	0.562353	0.685923	0.771279	0.887304	0.984375	1.05504	1.18677	1.27429	1.40798	1.56546	1.80096	2.20113	2.74686	4.19281	13.5508	30.8251	57.0643
0.00148168	0.0844863	0.137713	0.181718	0.240532	0.246094	0.257639	0.308995	0.348029	0.434182	0.494633	0.563743	0.688326	0.773041	0.887304	0.989317	1.0598	1.19278	1.27861	1.41765	1.56599	1.80465	2.20113	2.74836	4.26756	13.6516	30.8516	57.0885
0.00352353	0.0854297	0.139942	0.182591	0.241986	0.246094	0.258851	0.309035	0.348029	0.435228	0.496094	0.56424	0.689753	0.773472	0.887304	0.997226	1.06384	1.19461	1.28384	1.42074	1.57141	1.80581	2.21484	2.75141	4.29615	13.6904	31.1245	57.2411
0.00352353	0.0862337	0.139987	0.182821	0.24263	0.246094	0.259875	0.309753	0.348029	0.438075	0.496094	0.569316	0.691968	0.776314	0.887304	0.997534	1.06419	1.19857	1.28651	1.42505	1.57577	1.81134	2.21484	2.82703	4.42969	13.7284	31.2772	57.2985
0.00424824	0.0865545	0.140001	0.18327	0.242726	0.246094	0.25993	0.309858	0.350791	0.439007	0.498471	0.572169	0.694257	0.776499	0.887304	0.998051	1.06868	1.19875	1.29032	1.42803	1.57577	1.82271	2.22498	2.84491	4.5405	13.9554	31.3029	57.4168
0.00650754	0.0869746	0.141906	0.183281	0.244199	0.246094	0.260568	0.313552	0.350791	0.439619	0.49955	0.572248	0.69465	0.778217	0.889519	1.0005	1.06926	1.20217	1.29302	1.43201	1.57577	1.83479	2.22847	2.89616	4.61903	14.0317	31.3856	58.5519
0.00777633	0.0875693	0.1421	0.184925	0.244484	0.246094	0.260639	0.313709	0.350791	0.440194	0.499794	0.5729	0.696018	0.778217	0.890293	1.00057	1.07563	1.20518	1.30218	1.43496	1.57577	1.84501	2.23349	2.92217	4.633	14.0317	31.4298	58.9849
0.00906631	0.0899473	0.14215	0.185417	0.244869	0.246094	0.26116	0.319975	0.350791	0.440263	0.502445	0.573898	0.696045	0.778217	0.890577	1.00707	1.07832	1.21035	1.30801	1.43496	1.57577	1.84672	2.28903	2.92719	4.79105	14.0536	31.7728	60.1632
0.00984375	0.0899566	0.142823	0.18615	0.245335	0.246094	0.261704	0.321207	0.351463	0.44051	0.503928	0.573901	0.696058	0.778217	0.891892	1.00972	1.07955	1.21595	1.30965	1.43496	1.57577	1.85789	2.29554	2.92815	4.89691	14.2823	31.8452	60.4148
0.010374	0.0899728	0.142881	0.186347	0.246094	0.246094	0.261738	0.321249	0.351736	0.441386	0.504816	0.575829	0.696058	0.778217	0.89338	1.01023	1.08215	1.2179	1.31129	1.43496	1.60183	1.87419	2.31321	2.95312	5.11362	14.2828	31.9012	60.8443
0.0106277	0.0905896	0.143083	0.18677	0.246094	0.246094	0.264202	0.321502	0.352806	0.441487	0.506075	0.577758	0.696058	0.778217	0.89345	1.01467	1.08314	1.22011	1.31231	1.43496	1.60226	1.87419	2.31335	2.95658	5.15804	14.5182	31.9922	60.9507
0.0109539	0.0910488	0.143234	0.187207	0.246094	0.246094	0.264299	0.321653	0.353838	0.44194	0.507933	0.578771	0.696058	0.778217	0.893787	1.01467	1.09392	1.22284	1.31275	1.43496	1.60803	1.87645	2.31579	2.95774	5.17178	14.7129	32.7896	61.2337
0.0110201	0.0910588	0.144413	0.187244	0.246094	0.246094	0.26444	0.322571	0.354325	0.448	0.517221	0.579092	0.696058	0.778217	0.894784	1.01467	1.09457	1.22351	1.31496	1.43496	1.61596	1.88532	2.3284	2.97478	5.19135	14.8041	33.0833	62.2831
0.0125303	0.0918375	0.144678	0.187301	0.246094	0.246094	0.265746	0.322724	0.355141	0.448008	0.517656	0.579852	0.696058	0.778217	0.896692	1.01467	1.09464	1.22613	1.31812	1.43496	1.61831	1.89277	2.33017	3.03021	5.19865	14.8487	33.6099	64.2092
0.0146921	0.0919173	0.145024	0.188731	0.246094	0.246094	0.267249	0.322973	0.355184	0.449189	0.521016	0.580031	0.696058	0.778217	0.900518	1.01467	1.09763	1.23003	1.31812	1.43496	1.61858	1.90259	2.33736	3.04629	5.61041	15.2947	33.6279	64.2674
0.0150268	0.0920628	0.145056	0.189072	0.246094	0.246094	0.26737	0.324009	0.355373	0.451255	0.521347	0.580807	0.696058	0.778217	0.900616	1.01467	1.10034	1.23047	1.32526	1.43496	1.61866	1.91924	2.3485	3.06782	5.64639	15.3659	33.6996	64.5994
0.0165639	0.0922318	0.146202	0.189119	0.246094	0.246094	0.270957	0.325235	0.355896	0.451394	0.521378	0.583124	0.696058	0.778217	0.901579	1.01467	1.10056	1.23047	1.32526	1.43496	1.62622	1.92205	2.36168	3.0905	5.66545	15.5012	34.2406	64.9925
0.0173081	0.0931765	0.146419	0.189853	0.246094	0.246094	0.271898	0.326262	0.35612	0.455264	0.52157	0.584718	0.696058	0.778217	0.905066	1.01467	1.10056	1.23047	1.32526	1.43508	1.63103	1.92205	2.36634	3.09797	5.84585	15.8354	34.6864	65.0947
0.0175544	0.0934269	0.146931	0.190425	0.246094	0.246094	0.273053	0.327748	0.357042	0.457827	0.521879	0.587004	0.696058	0.778217	0.905418	1.01467	1.1011	1.23047	1.32526	1.43857	1.63333	1.93369	2.36787	3.11122	5.85954	16.0927	35.1593	66.0592
0.0176695	0.0935516	0.147165	0.191305	0.246094	0.246094	0.273147	0.32814	0.357708	0.458039	0.522352	0.587061	0.698579	0.778217	0.912556	1.01467	1.1037	1.23047	1.32526	1.44405	1.6362	1.96029	2.40384	3.13757	5.94196	16.1093	35.7618	66.8734
0.0181218	0.0941949	0.147176	0.192041	0.246094	0.246094	0.273346	0.328323	0.357818	0.45816	0.52308	0.590579	0.703006	0.778301	0.912888	1.01467	1.10673	1.23047	1.32526	1.4441	1.6383	1.96493	2.40561	3.15126	6.15027	16.6257	35.7762	66.9745
0.0182059	0.0942197	0.147709	0.193679	0.246094	0.246094	0.273376	0.328909	0.359439	0.458461	0.52763	0.592985	0.704098	0.781265	0.919219	1.01467	1.10765	1.23047	1.32533	1.4444	1.63834	1.96609	2.41832	3.15734	6.20117	17.1413	35.925	67.4788
0.0195366	0.0944758	0.147946	0.195421	0.246094	0.246094	0.27426	0.329277	0.361926	0.459204	0.529167	0.593653	0.709078	0.781279	0.936302	1.01467	1.1093	1.23047	1.32732	1.44698	1.64295	1.97052	2.45291	3.16956	6.36505	17.8678	36.4228	68.1055
0.021077	0.0948458	0.149597	0.195994	0.246094	0.246094	0.274493	0.329773	0.363158	0.460256	0.531154	0.59555	0.712489	0.782761	0.936759	1.01467	1.1093	1.23047	1.33114	1.44909	1.64373	1.97132	2.4559	3.19378	6.40755	17.8939	36.7334	69.034
0.0212442	0.0949502	0.15004	0.196279	0.246094	0.246094	0.274509	0.329847	0.367053	0.460379	0.532593	0.601791	0.713287	0.784393	0.937789	1.01467	1.11005	1.23047	1.33399	1.4709	1.65026	1.98407	2.46094	3.22461	6.50492	18.084	37.4203	70.5925
0.0217793	0.0953773	0.150181	0.196984	0.246094	0.246094	0.275688	0.329884	0.367188	0.461337	0.535743	0.602124	0.715003	0.789892	0.93911	1.01476	1.11194	1.23047	1.33622	1.47656	1.65085	1.98407	2.46094	3.24792	6.70008	18.2016	37.7094	71.7266
0.0218137	0.0954645	0.150307	0.198253	0.246094	0.246094	0.276583	0.330543	0.367211	0.463542	0.53603	0.603681	0.716651	0.793563	0.942692	1.01501	1.11303	1.23322	1.33752	1.47656	1.65085	1.98407	2.46472	3.30936	7.06919	18.2273	38.1198	71.8244
0.0219087	0.0954718	0.150385	0.198517	0.246094	0.246094	0.277875	0.330691	0.369091	0.464237	0.53613	0.604012	0.718116	0.793765	0.944317	1.01546	1.1144	1.23332	1.33984	1.47656	1.6575	1.99244	2.50048	3.33877	7.14416	18.818	38.5894	72.4641
0.02194	0.0956457	0.151194	0.198995	0.246094	0.246094	0.281555	0.330962	0.370264	0.465256	0.539988	0.604114	0.718669	0.795591	0.946533	1.01835	1.11597	1.23604	1.34298	1.4774	1.67154	2.01858	2.50963	3.34263	7.30847	18.8822	38.6399	73.501
0.0219955	0.096145	0.151639	0.199482	0.246094	0.246094	0.281921	0.33138	0.370487	0.465384	0.541728	0.604162	0.719414	0.796009	0.949135	1.01874	1.11625	1.24089	1.34442	1.48212	1.67342	2.02388	2.52097	3.35255	7.75475	18.9168	38.71	73.9833
0.0221484	0.0965732	0.152133	0.199951	0.246094	0.246094	0.282351	0.331488	0.37099	0.466097	0.54441	0.607463	0.719614	0.798252	0.950704	1.02301	1.12094	1.24116	1.34831	1.48721	1.67594	2.03429	2.55211	3.38958	7.77724	18.994	38.7293	74.042
0.0229121	0.0965919	0.152628	0.200411	0.246094	0.246094	0.282745	0.333352	0.371492	0.466318	0.544908	0.607651	0.720045	0.799613	0.950842	1.0251	1.12287	1.24573	1.35489	1.49039	1.67885	2.03581	2.55429	3.39261	7.98309	20.0104	39.1391	74.0892
0.0229267	0.0966097	0.152856	0.200687	0.246094	0.246094	0.284506	0.333817	0.372211	0.467825	0.545002	0.611067	0.722399	0.799823	0.953896	1.02636	1.12511	1.24649	1.35571	1.4907	1.68082	2.05474	2.57476	3.45687	8.10153	20.6086	39.2339	75.7643
0.0244999	0.0966849	0.154012	0.201068	0.246094	0.246094	0.284638	0.336012	0.373339	0.468991	0.545609	0.612136	0.723423	0.79995	0.953898	1.03165	1.13227	1.24806	1.35732	1.49604	1.69248	2.05601	2.58631	3.50796	8.11831	20.8617	39.6909	75.8314
0.024947	0.0972418	0.15541	0.202222	0.246094	0.246094	0.285737	0.339566	0.373563	0.469307	0.545733	0.613898	0.724071	0.800932	0.954347	1.03235	1.13394	1.25002	1.35865	1.49693	1.70076	2.06313	2.60875	3.52849	8.12553	20.9603	39.8606	76.2328
0.0249579	0.0974217	0.155836	0.204336	0.246094	0.246094	0.290301	0.340124	0.375095	0.470939	0.546196	0.618584	0.730087	0.804943	0.957329	1.03718	1.13502	1.25096	1.35968	1.49693	1.70145	2.06689	2.61401	3.55513	8.23637	21.0285	39.9226	77.8272
0.0253145	0.0974614	0.155886	0.204375	0.246094	0.246094	0.290429	0.341161	0.375116	0.471537	0.546583	0.619045	0.738281	0.808655	0.959983	1.04409	1.13862	1.25181	1.36612	1.49918	1.70466	2.12899	2.63265	3.59571	8.2468	21.1451	40.0885	78.8294
0.0255778	0.0982726	0.156125	0.204426	0.246094	0.246094	0.291941	0.341838	0.375118	0.471735	0.547129	0.621182	0.738281	0.812348	0.960012	1.04409	1.14277	1.25273	1.37871	1.50063	1.72201	2.13075	2.65051	3.66237	8.25379	21.5106	40.2458	81.2279
0.0258691	0.0983613	0.156217	0.204902	0.246094	0.246094	0.293482	0.342342	0.376213	0.473228	0.547146	0.621814	0.738281	0.812656	0.960698	1.04409	1.14578	1.2544	1.37953	1.50312	1.72266	2.13813	2.68239	3.69141	8.34061	21.6097	40.2838	82.4634
0.0259068	0.0984069	0.156329	0.206286	0.246094	0.246094	0.29473	0.343328	0.37866	0.473739	0.547411	0.625682	0.738281	0.81478	0.965672	1.04409	1.14971	1.25484	1.37981	1.50381	1.72266	2.14343	2.71286	3.74674	8.91655	21.6228	40.3391	83.176
0.0260449	0.0984283	0.15741	0.206394	0.246094	0.246094	0.295191	0.343355	0.379255	0.474075	0.549498	0.626232	0.738281	0.815354	0.969262	1.04409	1.14976	1.25484	1.39212	1.50536	1.72454	2.15082	2.71819	3.85626	8.94597	21.9667	40.6482	83.3891
0.0261905	0.0984929	0.158077	0.206714	0.246094	0.246259	0.296574	0.3465	0.382966	0.474491	0.550282	0.626407	0.738281	0.821637	0.970222	1.04409	1.15164	1.25484	1.39212	1.51028	1.73638	2.15733	2.73493	4.06085	8.98158	22.0113	40.8514	83.4414
0.0263668	0.0986843	0.158731	0.206777	0.246094	0.247426	0.296668	0.347165	0.38494	0.474589	0.550282	0.628279	0.738281	0.823311	0.972546	1.04422	1.15377	1.25484	1.39229	1.52077	1.73655	2.16025	2.73946	4.08771	9.61027	22.2853	40.8768	84.3525
0.0268033	0.0988159	0.158988	0.206924	0.246094	0.24799	0.299171	0.347603	0.386418	0.476008	0.550282	0.628653	0.738281	0.826138	0.974705	1.0445	1.15844	1.25484	1.39654	1.52287	1.74015	2.16508	2.75141	4.11366	9.65157	22.4853	40.8904	85.4677
0.0270821	0.0988427	0.159646	0.207082	0.246094	0.248047	0.299952	0.348029	0.390584	0.478579	0.550282	0.631237	0.738281	0.827928	0.9755	1.04747	1.15973	1.25484	1.39673	1.52401	1.74015	2.16611	2.75986	4.15729	9.75301	22.5943	40.9307	86.4067
0.0273067	0.0989438	0.159795	0.209681	0.246094	0.248047	0.299955	0.348029	0.390842	0.480202	0.550282	0.632643	0.738281	0.828059	0.979914	1.04768	1.1603	1.25484	1.41497	1.52712	1.74015	2.17998	2.76628	4.18788	10.0898	23.1229	41.4286	93.9866
0.0275493	0.0993622	0.160926	0.210059	0.246094	0.248047	0.300057	0.348029	0.39153	0.480569	0.550282	0.633364	0.738281	0.831753	0.981055	1.04988	1.1636	1.25484	1.41657	1.54255	1.74015	2.20113	2.76875	4.19219	10.4122	23.2786	42.1173	99.056
0.0276416	0.0997163	0.160977	0.211696	0.246094	0.248047	0.300551	0.348029	0.395536	0.480876	0.550282	0.634766	0.738281	0.837436	0.981415	1.05734	1.16413	1.25484	1.42052	1.54637	1.74778	2.21311	2.77002	4.25519	10.8309	23.9818	42.7654	103.748
0.0282164	0.100013	0.161733	0.211842	0.246094	0.248047	0.300673	0.348029	0.396662	0.481905	0.550282	0.634906	0.738281	0.841719	0.983572	1.05848	1.16802	1.25484	1.4206	1.54794	1.74912	2.21484	2.77226	4.26756	10.8837	24.2664	42.8849	107.672
0.0283777	0.100436	0.162181	0.212446	0.246094	0.248047	0.301332	0.348029	0.396714	0.481963	0.550282	0.635266	0.738281	0.842865	0.984323	1.05852	1.17715	1.25484	1.42587	1.55089	1.75058	2.21484	2.77325	4.35872	11.0619	24.8686	43.1752	109.369
0.0283793	0.10099	0.163287	0.212499	0.246094	0.248047	0.302161	0.348029	0.398125	0.482193	0.550282	0.635963	0.738281	0.844325	0.984375	1.05868	1.18066	1.26578	1.42591	1.55599	1.76113	2.22847	2.78856	4.36292	11.2276	25.4862	43.2086	112.179
0.0288132	0.10104	0.163715	0.213048	0.246094	0.248047	0.302872	0.348029	0.398333	0.482505	0.550282	0.637084	0.738281	0.847506	0.984375	1.06276	1.18073	1.27231	1.42708	1.55635	1.76685	2.249	2.7973	4.36592	11.569	25.739	43.2379
0.0289226	0.101339	0.163821	0.213209	0.246094	0.248047	0.303254	0.348029	0.398447	0.48455	0.550282	0.637579	0.738281	0.847633	0.984375	1.06525	1.18097	1.27496	1.42745	1.56915	1.77461	2.24989	2.8555	4.43652	11.6259	25.7771	43.2904
0.0293342	0.101341	0.164204	0.213705	0.246094	0.248047	0.30366	0.348029	0.400468	0.486802	0.550282	0.63792	0.738862	0.847767	0.984375	1.0655	1.18241	1.28823	1.42926	1.574	1.77846	2.25736	2.932	4.45407	11.8275	26.2566	43.9906
0.0294378	0.102366	0.164615	0.21417	0.246094	0.248047	0.303712	0.348029	0.402343	0.488758	0.550282	0.638454	0.73903	0.848188	0.984375	1.06623	1.18269	1.28988	1.43032	1.57577	1.79159	2.27839	2.93338	4.67584	11.9088	26.5293	44.1728
0.0300178	0.102408	0.16489	0.214249	0.246094	0.249356	0.303859	0.348029	0.404057	0.491435	0.550282	0.638522	0.740569	0.848814	0.984375	1.06632	1.19136	1.29269	1.43138	1.57577	1.80279	2.27841	2.95586	4.87528	12.0322	26.5801	44.314
0.0303455	0.102635	0.165738	0.214403	0.246094	0.251528	0.304009	0.348029	0.405095	0.491882	0.550282	0.643818	0.741543	0.850407	0.984375	1.06807	1.19222	1.29298	1.43496	1.57822	1.80362	2.30097	2.98269	4.88052	12.0586	26.6951	45.397
0.0303729	0.102757	0.165789	0.214765	0.246094	0.251676	0.304518	0.348029	0.405223	0.492188	0.550282	0.644729	0.742045	0.851486	0.984375	1.07342	1.1942	1.29596	1.43496	1.57853	1.80581	2.31619	2.99446	4.94642	12.1669	26.8513	45.5894
0.0311608	0.103627	0.165899	0.217697	0.246094	0.252374	0.304967	0.348029	0.406296	0.492188	0.550282	0.645075	0.742577	0.853045	0.984375	1.07864	1.19664	1.30236	1.43496	1.58341	1.82837	2.33486	3.01785	5.04136	12.6055	26.9425	45.8387
0.0319515	0.104926	0.166134	0.218127	0.246094	0.252826	0.306629	0.348029	0.40718	0.492188	0.550282	0.645927	0.743464	0.857007	0.984375	1.07942	1.20093	1.30359	1.43496	1.5879	1.83119	2.33718	3.01863	5.11362	12.9413	27.5207	46.3641
0.0320595	0.105252	0.166613	0.218173	0.246094	0.253237	0.307785	0.348029	0.407495	0.492188	0.550282	0.648416	0.745229	0.858235	0.984375	1.08199	1.20445	1.3069	1.43496	1.59061	1.85338	2.33875	3.05385	5.26116	13.0031	27.5992	46.7682
0.0324118	0.105489	0.168465	0.218547	0.246094	0.253933	0.307947	0.348029	0.408069	0.492188	0.550282	0.650777	0.74552	0.862764	0.984375	1.08219	1.2076	1.30694	1.43496	1.59186	1.85344	2.34652	3.05412	5.29353	13.3603	27.6437	47.2625
0.0326311	0.105501	0.168607	0.218861	0.246094	0.256193	0.308191	0.348029	0.41032	0.492188	0.550282	0.651516	0.746994	0.862944	0.984375	1.0842	1.20799	1.30827	1.43496	1.59288	1.87307	2.3468	3.07354	5.30424	13.4155	27.6951	47.2755
0.0327231	0.106113	0.169386	0.219299	0.246094	0.256238	0.309337	0.348029	0.41068	0.492188	0.550282	0.651548	0.74949	0.863282	0.984375	1.08709	1.21144	1.30859	1.43496	1.60052	1.87419	2.35797	3.08527	5.31368	13.5066	27.8754	48.1238
0.032874	0.106115	0.169449	0.220231	0.246094	0.257484	0.309624	0.348029	0.413302	0.492188	0.550282	0.652793	0.75023	0.86468	0.984375	1.09019	1.2123	1.30986	1.43496	1.61514	1.87419	2.37475	3.09011	5.34752	13.6084	28.0299	48.2369
0.0330676	0.106275	0.16966	0.220472	0.246094	0.258262	0.309779	0.348029	0.415604	0.492188	0.550282	0.654171	0.752535	0.871984	0.984399	1.09131	1.21399	1.30989	1.43496	1.61806	1.88381	2.37976	3.10174	5.47894	13.6191	28.083	48.3774
0.033447	0.106364	0.170266	0.221377	0.246094	0.258488	0.309806	0.348029	0.417587	0.492188	0.550282	0.654699	0.753076	0.872193	0.987082	1.09169	1.21454	1.314	1.43601	1.62123	1.89546	2.40444	3.13757	5.52304	13.7861	28.5012	49.0007
0.0337169	0.106529	0.171358	0.221956	0.246094	0.258901	0.310387	0.348029	0.417838	0.492188	0.550282	0.656298	0.753596	0.872358	0.990694	1.09196	1.21813	1.31827	1.44149	1.62521	1.90359	2.40654	3.13924	5.73497	13.7972	28.7945	49.4673
0.0346083	0.107257	0.171768	0.222068	0.246094	0.259678	0.312213	0.348029	0.419251	0.492188	0.550282	0.656424	0.754464	0.875033	0.995617	1.10056	1.21881	1.3218	1.44303	1.64163	1.9149	2.40805	3.21728	5.76149	13.8726	28.9457	49.8837
0.0349473	0.108439	0.172251	0.222077	0.246094	0.260117	0.313906	0.348029	0.41959	0.492188	0.550282	0.657584	0.754616	0.875764	0.99632	1.10056	1.21977	1.32186	1.44803	1.64184	1.91559	2.40955	3.22461	6.17363	13.9246	29.0314	49.9708
0.0352464	0.108779	0.172733	0.223242	0.246094	0.260656	0.314633	0.348029	0.420664	0.492188	0.550282	0.658319	0.755415	0.875841	0.99697	1.10056	1.22238	1.32335	1.44852	1.64972	1.91974	2.41832	3.24419	6.27559	13.9261	29.0637	50.2913
0.0354921	0.108948	0.17302	0.223331	0.246094	0.261718	0.315508	0.348029	0.423146	0.492188	0.550282	0.658569	0.755577	0.876749	0.998656	1.10056	1.22667	1.32516	1.4505	1.65085	1.9199	2.42889	3.2453	6.40134	14.0193	29.0758	50.6384
0.0359931	0.109211	0.173183	0.225424	0.246094	0.263256	0.317301	0.348029	0.424472	0.492188	0.550282	0.659554	0.759107	0.877484	1.00047	1.10056	1.22955	1.32526	1.4584	1.65085	1.93033	2.46094	3.29076	6.43163	14.0461	29.0789	50.6847
0.0361163	0.109301	0.17328	0.227108	0.246094	0.263276	0.31917	0.348029	0.425189	0.492188	0.550282	0.66062	0.759159	0.878594	1.0076	1.10056	1.23047	1.32526	1.46202	1.65085	1.93755	2.47928	3.30936	6.44089	14.0701	29.137	51.1235
0.0361314	0.109383	0.174077	0.228481	0.246094	0.26346	0.31925	0.348029	0.426316	0.492188	0.550366	0.660919	0.760192	0.878693	1.0102	1.10056	1.23047	1.32526	1.46266	1.65195	1.93873	2.49483	3.3583	6.46104	14.0769	29.1392	51.3834
0.0361749	0.109672	0.174237	0.230924	0.246094	0.263546	0.320258	0.348029	0.430198	0.492188	0.552366	0.662946	0.762473	0.878992	1.01079	1.10885	1.23047	1.32526	1.46597	1.67567	1.95018	2.5094	3.38155	6.5891	14.2336	29.5354	51.6443
0.0365845	0.110315	0.174736	0.230931	0.246094	0.26422	0.320267	0.348029	0.430337	0.492188	0.553057	0.663068	0.763868	0.879672	1.0132	1.1093	1.23047	1.32526	1.46701	1.67764	1.95306	2.50967	3.43355	6.68542	14.2772	30.3355	51.8355
0.0367226	0.11081	0.175312	0.231422	0.246094	0.266204	0.320565	0.348029	0.430579	0.492188	0.554568	0.663916	0.76538	0.880345	1.01467	1.1093	1.23047	1.32526	1.47394	1.67879	1.96875	2.5367	3.45736	6.70488	14.4469	30.4928	52.0418
0.0371212	0.110827	0.175484	0.231741	0.246094	0.266889	0.321749	0.348029	0.431449	0.492188	0.55465	0.664147	0.765677	0.882193	1.01467	1.1095	1.23047	1.32526	1.47568	1.68573	1.97679	2.54066	3.55888	6.73921	14.9932	30.6714	52.0866
0.0372428	0.111463	0.175511	0.232158	0.246094	0.267097	0.321908	0.348449	0.43165	0.492188	0.55465	0.66793	0.766507	0.886925	1.01467	1.11042	1.23047	1.32526	1.47656	1.71579	1.98407	2.54689	3.66237	6.84471	15.0145	30.9454	52.255
0.037259	0.112241	0.175581	0.232232	0.246094	0.267316	0.321929	0.348668	0.434136	0.492188	0.55465	0.669091	0.769543	0.887304	1.01467	1.11209	1.23047	1.32526	1.47656	1.71586	1.98788	2.55341	3.73732	6.99779	15.2738	30.9506	52.3553
0.0380969	0.112315	0.176737	0.23296	0.246094	0.269556	0.323827	0.350791	0.434592	0.492188	0.557472	0.670064	0.770525	0.887304	1.01467	1.11287	1.23047	1.32526	1.47656	1.72211	1.99969	2.59106	3.76141	7.05574	15.8249	31.0692	52.4037
0.0382566	0.112565	0.176991	0.233138	0.246094	0.269573	0.324665	0.350791	0.435945	0.492188	0.558405	0.670209	0.771208	0.887304	1.01467	1.11962	1.23047	1.33259	1.47656	1.72266	2.00657	2.59878	3.77767	7.06372	15.9146	31.194	52.4367
0.0384985	0.11267	0.177919	0.234027	0.246094	0.269654	0.327102	0.35226	0.436661	0.492188	0.558627	0.671321	0.771318	0.887304	1.01467	1.11981	1.23047	1.33577	1.47656	1.72266	2.01581	2.61101	3.86479	7.17576	16.1703	31.2554	52.4582
0.0385456	0.113678	0.178091	0.234294	0.246094	0.269787	0.32811	0.352632	0.437234	0.493901	0.559589	0.67342	0.773159	0.887304	1.01467	1.12436	1.23047	1.33585	1.48868	1.72266	2.01938	2.61475	3.89764	7.19915	16.387	32.0231	53.1428
0.0390803	0.113748	0.179763	0.234413	0.246094	0.271085	0.329176	0.354287	0.438501	0.496094	0.561135	0.673428	0.773671	0.887304	1.01467	1.13092	1.23047	1.3453	1.49551	1.73368	2.02024	2.6205	3.9375	7.24202	16.5946	32.3008	53.3472
0.0393819	0.113814	0.179781	0.234746	0.246094	0.271464	0.329842	0.354625	0.438754	0.496094	0.561804	0.676045	0.774899	0.887304	1.01467	1.13133	1.23047	1.34564	1.49693	1.73476	2.05304	2.63411	3.99303	7.24731	16.7574	32.5091	53.3583
0.0400233	0.113974	0.180334	0.235591	0.246094	0.271579	0.331692	0.354867	0.439094	0.496094	0.561938	0.678135	0.777778	0.887304	1.01467	1.13163	1.23047	1.34862	1.49693	1.73609	2.05373	2.64324	4.04945	7.36008	16.8241	32.5412	53.5205
0.0401378	0.114046	0.180682	0.236087	0.246094	0.272178	0.332726	0.356664	0.439397	0.496094	0.563392	0.679478	0.778217	0.887304	1.01467	1.13185	1.23092	1.35169	1.49693	1.73978	2.06544	2.65051	4.07132	7.41905	16.8464	32.8104	53.5302
0.0405011	0.114087	0.180767	0.236922	0.246094	0.272476	0.333143	0.357378	0.440067	0.496094	0.56468	0.686269	0.778217	0.887304	1.01467	1.13241	1.2322	1.35565	1.50884	1.74015	2.06549	2.65652	4.18488	7.59005	17.1981	32.8788	53.7211
0.0406727	0.114225	0.180782	0.237128	0.246094	0.278843	0.33399	0.35925	0.440542	0.497616	0.565376	0.688499	0.778217	0.887304	1.01467	1.13266	1.2351	1.36894	1.51387	1.74015	2.06786	2.67977	4.18734	7.65041	18.0339	33.3516	54.0013
0.0414714	0.115176	0.181909	0.237671	0.246094	0.279336	0.334194	0.363033	0.441136	0.499068	0.565581	0.689023	0.778217	0.887304	1.01467	1.13309	1.238	1.36908	1.5183	1.74337	2.1122	2.68393	4.18857	7.70544	18.5204	33.6222	54.0013
0.0415507	0.115503	0.18372	0.238317	0.246094	0.281576	0.335023	0.365468	0.441532	0.500408	0.566508	0.690441	0.778217	0.887304	1.01467	1.13355	1.24559	1.37423	1.52564	1.74716	2.11698	2.70314	4.21372	7.73648	18.5814	33.6257	54.1172
0.0416744	0.116724	0.184106	0.239324	0.246094	0.281599	0.335562	0.367345	0.444522	0.501414	0.566707	0.692466	0.778217	0.887304	1.01467	1.13628	1.25484	1.37901	1.53612	1.75304	2.12568	2.71819	4.26756	7.91315	18.5927	33.7652	54.349
0.0417332	0.116736	0.184877	0.240103	0.246094	0.281783	0.335893	0.368921	0.44634	0.501623	0.567386	0.692484	0.778217	0.887304	1.01467	1.14497	1.25484	1.38065	1.53759	1.76182	2.14343	2.72501	4.27005	8.06121	18.8592	34.0502	54.5184
0.0417653	0.116778	0.185013	0.240314	0.246094	0.282074	0.341308	0.369647	0.447406	0.502718	0.569446	0.695795	0.778217	0.887304	1.01467	1.14725	1.25484	1.38718	1.53842	1.77461	2.15404	2.75141	4.301	8.47217	19.1863	34.3679	55.3122
0.0418759	0.116935	0.185267	0.241209	0.246094	0.283671	0.341321	0.369922	0.450574	0.503041	0.57096	0.696058	0.778217	0.887304	1.01467	1.15387	1.25484	1.39047	1.53947	1.77461	2.15528	2.76642	4.34027	8.66935	19.241	34.6992	55.4306
0.041894	0.117254	0.185357	0.241327	0.246094	0.283856	0.342163	0.371218	0.450678	0.504349	0.571931	0.696058	0.778217	0.890314	1.01467	1.15846	1.25484	1.39212	1.54048	1.78573	2.15971	2.77325	4.43394	8.7854	19.8473	35.25	55.492
0.042317	0.117982	0.185614	0.241618	0.246094	0.283889	0.342229	0.373987	0.453438	0.505653	0.572134	0.696058	0.778217	0.895029	1.01614	1.16036	1.25484	1.39212	1.54513	1.79015	2.20113	2.78829	4.43522	8.79409	19.9025	35.3629	55.8629
0.0423374	0.118018	0.187013	0.242106	0.246094	0.284836	0.342235	0.37471	0.453613	0.505867	0.572457	0.696058	0.778217	0.899838	1.01926	1.16085	1.25484	1.39212	1.54608	1.79159	2.20327	2.81629	4.43782	8.79565	20.541	35.6351	56.5295
0.0426035	0.118223	0.187337	0.242294	0.246094	0.286012	0.342798	0.374984	0.454385	0.507891	0.572623	0.696058	0.778217	0.902538	1.02272	1.16334	1.25484	1.39212	1.55362	1.79846	2.20667	2.83377	4.4683	9.35156	20.629	35.6801	57.1608
0.0426195	0.118385	0.187536	0.242418	0.246094	0.286304	0.34331	0.376406	0.45581	0.510456	0.57396	0.696058	0.778217	0.905841	1.02274	1.17316	1.25484	1.39212	1.55396	1.80299	2.21484	2.84383	4.50307	9.68816	20.6576	35.7344	57.4026
0.0426989	0.118513	0.188306	0.244078	0.246094	0.286583	0.344201	0.377916	0.456741	0.511337	0.574025	0.696058	0.778217	0.909644	1.02617	1.17616	1.25484	1.39212	1.55543	1.80581	2.21484	2.85221	4.53848	9.75301	20.7458	35.8614	57.5132
0.0428009	0.118556	0.18851	0.244169	0.246094	0.286705	0.344426	0.379642	0.458042	0.511737	0.574969	0.696058	0.778217	0.912224	1.02849	1.18061	1.25484	1.40399	1.55643	1.80869	2.21892	2.89054	4.58845	9.84683	20.7493	36.1956	57.5772
0.0432667	0.11867	0.188876	0.244847	0.246094	0.286725	0.344717	0.383461	0.460106	0.512243	0.575598	0.696058	0.778217	0.912826	1.03127	1.18236	1.25627	1.40875	1.55643	1.81075	2.22197	2.95888	4.6138	10.2573	20.7795	36.2828	57.6622
0.0432964	0.119124	0.190156	0.24499	0.246094	0.287108	0.346228	0.383566	0.460287	0.512822	0.576105	0.696058	0.778217	0.914184	1.03229	1.19108	1.25647	1.4108	1.56157	1.81267	2.22615	2.96214	4.61489	10.3389	20.9138	36.3026	57.6872
0.0436102	0.12023	0.191293	0.246094	0.246094	0.287354	0.348029	0.387329	0.461836	0.513064	0.576723	0.696058	0.778217	0.914397	1.03248	1.19392	1.25866	1.41458	1.56289	1.81404	2.22847	2.96581	4.62301	10.4005	21.4001	36.5113	57.7664
0.0438587	0.121058	0.191413	0.246094	0.246094	0.288572	0.348029	0.387949	0.463192	0.514773	0.577091	0.696058	0.778217	0.924059	1.03468	1.19601	1.261	1.42575	1.56879	1.82371	2.22964	2.98769	4.62639	10.7752	21.6268	37.0916	58.7204
0.0439982	0.121612	0.191671	0.246094	0.246094	0.288838	0.348029	0.388747	0.465409	0.519027	0.577738	0.696058	0.778217	0.927702	1.03616	1.19939	1.26208	1.42628	1.57124	1.82606	2.24625	2.99806	4.7366	10.8497	21.6432	37.316	59.0074
0.0441745	0.121623	0.191735	0.246094	0.246094	0.290057	0.348029	0.389358	0.468142	0.519806	0.577763	0.696058	0.778217	0.934715	1.03727	1.20313	1.26446	1.42657	1.57577	1.83525	2.26144	3.02197	4.7752	11.1161	21.8573	37.4532	59.4117
0.0443058	0.121879	0.19217	0.246094	0.246094	0.290888	0.348029	0.389905	0.469263	0.522418	0.580586	0.696058	0.781621	0.939366	1.03908	1.20416	1.26556	1.42857	1.57577	1.85671	2.26887	3.02545	4.89923	11.2488	22.6222	37.6169	60.3448
0.0444051	0.121889	0.192618	0.246094	0.246094	0.291044	0.348029	0.390112	0.469383	0.523394	0.580628	0.696058	0.782254	0.940242	1.04369	1.20586	1.26886	1.43335	1.57577	1.86823	2.2698	3.03639	4.95201	11.2527	22.7078	37.6963	60.7963
0.0447243	0.122029	0.19271	0.246094	0.246094	0.29139	0.348029	0.390145	0.47306	0.524103	0.580931	0.696058	0.784393	0.943043	1.04409	1.20724	1.27151	1.43496	1.57577	1.87625	2.28394	3.0421	5.05664	11.323	23.0643	37.8217	60.9898
0.0450259	0.122175	0.193337	0.246094	0.246094	0.291983	0.348029	0.391304	0.473488	0.524863	0.581279	0.696058	0.784676	0.946077	1.04409	1.20817	1.27274	1.43496	1.57577	1.89939	2.33334	3.05059	5.18506	11.5669	23.5936	37.9958	61.1697
0.0452433	0.122241	0.193449	0.246094	0.246094	0.294523	0.348029	0.392656	0.473698	0.524911	0.581468	0.699057	0.785927	0.947158	1.04409	1.20922	1.28117	1.43496	1.57998	1.91004	2.3366	3.08629	5.28923	11.6016	23.6204	38.4533	62.5684
0.0453444	0.123323	0.1937	0.246094	0.246094	0.294956	0.348029	0.393248	0.476384	0.525393	0.582195	0.701583	0.787674	0.947214	1.04409	1.21346	1.29219	1.43496	1.59245	1.91104	2.37031	3.13757	5.30843	11.6104	24.0607	38.5481	63.0713
0.0454136	0.123421	0.194278	0.246094	0.246094	0.296894	0.348029	0.393656	0.4783	0.527271	0.585581	0.703115	0.787908	0.948152	1.04409	1.21611	1.29862	1.43496	1.59309	1.91754	2.38316	3.14638	5.38339	11.7868	24.1944	38.8294	63.5078
0.0455273	0.12365	0.194865	0.246094	0.246094	0.29708	0.348029	0.395427	0.480406	0.529484	0.586647	0.703422	0.788923	0.953898	1.04409	1.23013	1.3073	1.43496	1.60851	1.92205	2.38385	3.15414	5.4128	11.9092	24.3645	38.8508	63.8823
0.0456638	0.123688	0.195015	0.246094	0.246094	0.297513	0.348029	0.395812	0.480658	0.53032	0.586968	0.70407	0.790251	0.954	1.04774	1.23047	1.31859	1.43496	1.6111	1.92205	2.43063	3.1659	5.42441	12.0586	24.4382	38.9289	64.035
0.046245	0.124161	0.195298	0.246094	0.246094	0.297648	0.348029	0.396266	0.481493	0.531361	0.586988	0.706574	0.790572	0.954858	1.05687	1.23047	1.32198	1.43496	1.61508	1.92457	2.43869	3.22461	5.4368	12.4084	24.4895	38.9919	64.3711
0.0464736	0.124402	0.195477	0.246094	0.246094	0.298865	0.348029	0.396878	0.482039	0.531502	0.587747	0.708543	0.796229	0.959321	1.06626	1.23047	1.32526	1.43496	1.61758	1.92828	2.45866	3.23705	5.5578	12.4311	24.5556	39.0452	64.5156
0.046556	0.124483	0.19571	0.246094	0.24623	0.300883	0.348029	0.397243	0.48245	0.536483	0.589428	0.710879	0.79791	0.962711	1.06708	1.23047	1.32526	1.43496	1.61934	1.9307	2.46076	3.30936	5.83387	12.5417	24.9262	39.1482	65.1952
0.0467307	0.12453	0.195891	0.246094	0.246235	0.300987	0.348029	0.39751	0.482457	0.537019	0.592079	0.713156	0.801853	0.962927	1.07613	1.23047	1.32526	1.44743	1.62905	1.93839	2.46094	3.32584	5.95221	12.6949	25.07	39.4073	65.2533
0.0467688	0.124561	0.195919	0.246094	0.246508	0.301792	0.348029	0.3985	0.482466	0.538009	0.593715	0.714567	0.806743	0.965126	1.07797	1.23047	1.32526	1.44788	1.63295	1.946	2.46196	3.33385	5.95829	12.8001	25.756	39.5189	65.7343
0.0468345	0.124817	0.196389	0.246094	0.247335	0.301878	0.348029	0.399711	0.48274	0.538534	0.596672	0.716821	0.811156	0.966719	1.07865	1.23047	1.32526	1.44947	1.63446	1.96338	2.46305	3.33451	6.00841	12.8654	25.8691	39.6723	66.1212
0.0468834	0.124972	0.196502	0.246094	0.247378	0.302533	0.348029	0.401392	0.483246	0.54151	0.597329	0.721002	0.811603	0.967174	1.08315	1.23047	1.32526	1.45237	1.6484	1.96853	2.46534	3.39432	6.16356	12.8869	26.1136	39.8387	67.559
0.046917	0.125078	0.196631	0.246094	0.247845	0.303909	0.348029	0.402807	0.483955	0.544691	0.597444	0.722876	0.81215	0.969054	1.08374	1.23047	1.32526	1.45425	1.65085	1.98407	2.47321	3.45409	6.2306	13.0045	26.2556	40.0132	68.1397
0.0471692	0.125218	0.196772	0.246094	0.248047	0.305129	0.348029	0.403433	0.484264	0.550282	0.599249	0.723078	0.812444	0.969087	1.0841	1.23047	1.32526	1.4545	1.65085	1.98407	2.4744	3.46319	6.28311	13.1032	26.6191	40.1466	68.458
0.0475361	0.12559	0.197614	0.246094	0.248047	0.305725	0.348029	0.405317	0.488205	0.550282	0.602162	0.725179	0.81341	0.970662	1.08711	1.23047	1.32526	1.45654	1.66422	1.99478	2.47895	3.4887	6.3063	13.2305	26.6472	40.2121	69.102
0.0475732	0.125807	0.198017	0.246094	0.248047	0.309361	0.348029	0.405434	0.490056	0.550282	0.603255	0.726809	0.814276	0.972005	1.08835	1.23047	1.32526	1.46105	1.66941	2.00796	2.48076	3.58268	6.57948	13.374	26.7417	40.3732	69.2431
0.0476955	0.126096	0.198155	0.246094	0.248047	0.309614	0.348029	0.407229	0.490436	0.550282	0.605568	0.727041	0.819377	0.973064	1.09139	1.23047	1.32593	1.4734	1.67355	2.02934	2.4823	3.58411	6.60476	13.3999	26.8206	40.7121	69.3867
0.0481214	0.127015	0.198822	0.246094	0.248047	0.31019	0.348029	0.407956	0.492188	0.550282	0.606187	0.728173	0.819502	0.978686	1.09174	1.23126	1.33078	1.47656	1.6842	2.03194	2.50668	3.6082	6.60564	13.4246	26.9151	40.7639	69.4276
0.0481987	0.127048	0.199186	0.246094	0.248047	0.310346	0.348029	0.410216	0.492188	0.550282	0.606219	0.731051	0.821956	0.979738	1.09273	1.23146	1.33577	1.47656	1.68629	2.03683	2.52472	3.66237	6.61255	13.5066	27.2225	40.7982	69.7396
0.0489179	0.127057	0.199805	0.246094	0.248047	0.310537	0.348029	0.410413	0.492188	0.550282	0.60774	0.732366	0.822853	0.982929	1.09309	1.23159	1.33657	1.47656	1.69123	2.05343	2.53092	3.68628	6.64013	13.6687	27.4303	41.403	69.8546
0.0490747	0.127673	0.200721	0.246094	0.248047	0.311472	0.348029	0.410475	0.492188	0.550282	0.611855	0.733774	0.824307	0.982991	1.09624	1.23183	1.33892	1.47783	1.69349	2.06544	2.53369	3.80267	6.67591	13.7526	27.682	41.9782	70.0898
0.0492055	0.128387	0.201289	0.246094	0.248047	0.311563	0.348029	0.411405	0.492188	0.550282	0.612779	0.734324	0.826113	0.983342	1.09739	1.23329	1.33918	1.47861	1.69482	2.06844	2.54434	3.81345	6.68048	13.8694	27.7045	42.3534	70.0995
0.0493772	0.128449	0.201319	0.246094	0.248047	0.311915	0.348029	0.414576	0.492188	0.550282	0.615097	0.736505	0.827066	0.984375	1.0996	1.23367	1.34063	1.48235	1.72266	2.07751	2.55918	3.82262	6.95133	14.0105	27.7403	42.5583	71.2256
0.0496561	0.128489	0.201365	0.246094	0.248047	0.312908	0.348029	0.416062	0.492188	0.550282	0.615194	0.738281	0.828203	0.984375	1.10031	1.24016	1.34148	1.48433	1.73019	2.09306	2.56509	3.83434	7.06274	14.0534	27.775	42.8141	72.2813
0.049716	0.1288	0.201468	0.246094	0.248047	0.313449	0.348029	0.416166	0.492188	0.550282	0.618744	0.738281	0.828667	0.984375	1.10056	1.24059	1.34344	1.4854	1.73524	2.10263	2.58739	3.91585	7.1214	14.2187	27.7759	43.1085	72.6985
0.0499667	0.128809	0.201596	0.246094	0.248303	0.314246	0.348029	0.416716	0.492188	0.550282	0.619129	0.738281	0.832692	0.984375	1.10056	1.24682	1.34573	1.48874	1.73831	2.12287	2.58985	3.93101	7.15869	14.3425	28.0458	43.2295	73.4389
0.0506518	0.128827	0.202053	0.246094	0.249304	0.315156	0.348029	0.417896	0.492188	0.550282	0.619645	0.738281	0.834583	0.984375	1.10056	1.24772	1.35171	1.49586	1.74015	2.12319	2.60069	3.93878	7.16636	14.4911	28.0603	43.2435	73.6231
0.0506738	0.129493	0.202295	0.246094	0.249334	0.315309	0.348029	0.41894	0.492188	0.550282	0.620124	0.738281	0.835727	0.984375	1.10056	1.25004	1.3594	1.49693	1.74015	2.12379	2.60114	4.08367	7.17387	14.6376	28.244	44.069	74.0434
0.0507993	0.129917	0.202725	0.246094	0.249677	0.315865	0.348029	0.41929	0.492188	0.550282	0.620477	0.738281	0.839635	0.984375	1.10056	1.25091	1.36061	1.49693	1.74015	2.14032	2.64439	4.19237	7.28552	14.8397	28.3288	44.307	75.4114
0.0510788	0.130033	0.20274	0.246094	0.25043	0.316729	0.348029	0.420785	0.492188	0.550282	0.621383	0.738281	0.839918	0.984375	1.10056	1.25202	1.36389	1.49693	1.74015	2.14795	2.65051	4.20713	7.49135	14.9252	28.3393	44.3406	76.1379
0.0512367	0.130197	0.203657	0.246094	0.251378	0.317318	0.348029	0.42085	0.492188	0.550282	0.625747	0.738281	0.840822	0.984375	1.10056	1.25243	1.36799	1.509	1.75462	2.15551	2.66332	4.2406	7.67531	15.3162	28.5862	44.3969	76.4411
0.0515796	0.130259	0.204336	0.246094	0.251484	0.31765	0.348029	0.420852	0.492188	0.550282	0.628943	0.738281	0.842622	0.984375	1.10056	1.25484	1.37168	1.51344	1.7592	2.15633	2.68257	4.25819	7.70544	15.3646	28.6067	44.5437	77.6434
0.0517396	0.130504	0.206664	0.246094	0.251836	0.317887	0.348029	0.421972	0.492188	0.550282	0.629082	0.738281	0.842808	0.984375	1.10056	1.25484	1.37533	1.52861	1.77461	2.16851	2.68271	4.29655	7.70644	15.4031	28.6696	44.6034	77.8357
0.0518427	0.130796	0.206714	0.246094	0.252287	0.318541	0.348029	0.422494	0.492188	0.550282	0.629407	0.738281	0.843963	0.984375	1.10404	1.25484	1.37545	1.54183	1.77905	2.16888	2.68683	4.33079	7.7275	15.5868	28.965	45.053	78.2953
0.0521058	0.13098	0.207024	0.246094	0.252325	0.3187	0.348029	0.422886	0.492188	0.550282	0.629632	0.738281	0.846396	0.984375	1.1069	1.25484	1.37872	1.54393	1.78421	2.19449	2.71009	4.36701	7.85012	15.7695	29.0345	45.1453	78.5043
0.052168	0.131172	0.207391	0.246094	0.253049	0.320677	0.348029	0.424525	0.492188	0.550282	0.632479	0.738281	0.847558	0.984375	1.10832	1.25484	1.38137	1.55643	1.79159	2.19699	2.71762	4.4306	7.88139	15.8195	29.0766	46.0616	79.1793
0.0522286	0.131211	0.208021	0.246094	0.255386	0.321484	0.348029	0.425596	0.492188	0.550282	0.636072	0.738281	0.848607	0.985005	1.1093	1.25484	1.38878	1.55643	1.79867	2.20325	2.72983	4.45695	8.25845	15.9069	29.0821	46.4243	79.5222
0.0529481	0.131944	0.208434	0.246094	0.257436	0.321929	0.350791	0.427757	0.492188	0.550282	0.639811	0.738281	0.852187	0.9876	1.1093	1.25484	1.39212	1.56004	1.80241	2.21484	2.76546	4.47173	8.32901	16.0282	29.7503	46.7636	80.2219
0.0531819	0.132344	0.208483	0.246094	0.257472	0.322162	0.350791	0.428452	0.492188	0.550282	0.641448	0.738281	0.853166	0.991019	1.11738	1.25484	1.39212	1.56081	1.80581	2.21618	2.77325	4.51697	8.38165	16.1546	29.8776	46.774	83.5385
0.0531991	0.132367	0.208976	0.246094	0.259879	0.322599	0.351175	0.431745	0.492188	0.550282	0.641662	0.738281	0.854412	0.997828	1.1179	1.25484	1.39646	1.56515	1.80754	2.22847	2.78171	4.63878	8.49647	16.2292	29.8798	47.0665	84.8573
0.0532456	0.132442	0.209951	0.246094	0.261373	0.323194	0.352044	0.431941	0.492188	0.550282	0.642916	0.738281	0.85457	1.00027	1.12129	1.26176	1.39932	1.57022	1.81945	2.22847	2.81315	4.64099	8.5734	16.4101	30.0067	47.4433	86.1977
0.0534348	0.13248	0.209968	0.246094	0.261376	0.323205	0.352068	0.434862	0.492188	0.550282	0.645368	0.738281	0.858376	1.00296	1.12152	1.26547	1.40618	1.57126	1.8215	2.23615	2.8399	4.67551	8.5903	16.5265	30.0657	47.7342	86.8812
0.0537477	0.132791	0.210125	0.246094	0.261589	0.323343	0.353558	0.43588	0.492188	0.550282	0.645889	0.738281	0.858947	1.00304	1.12689	1.26642	1.41998	1.57197	1.84208	2.25463	2.8625	4.68867	8.73893	17.6233	30.2528	48.0144	90.9748
0.0540345	0.132809	0.21058	0.246094	0.261721	0.323565	0.354613	0.436278	0.492188	0.550282	0.646359	0.738328	0.860274	1.00398	1.13855	1.27852	1.42121	1.58605	1.85396	2.25514	2.91412	4.72065	9.10879	17.7974	30.4419	48.3108	94.8419
0.0543926	0.132869	0.211172	0.246094	0.262957	0.324686	0.35504	0.436298	0.492188	0.550282	0.647005	0.739452	0.860586	1.00507	1.13855	1.27881	1.42312	1.59086	1.86116	2.27016	2.94781	4.79673	9.16963	18.3762	30.5968	48.5614	99.0744
0.0544786	0.133214	0.21119	0.246094	0.264091	0.325576	0.355868	0.439508	0.492188	0.550282	0.649989	0.742525	0.861215	1.00599	1.13937	1.28913	1.42386	1.59991	1.87419	2.28797	2.95276	4.80213	9.31588	18.4465	30.8607	48.8123	103.541
0.0546309	0.13389	0.211985	0.246094	0.264179	0.325715	0.356366	0.443292	0.492188	0.550282	0.650153	0.742836	0.861708	1.0071	1.14835	1.29394	1.4303	1.60997	1.87427	2.28865	2.96957	4.84226	9.3548	18.5493	31.1146	49.0105	103.615
0.0546945	0.134017	0.211993	0.246094	0.264468	0.32747	0.357939	0.444033	0.493226	0.550282	0.650779	0.743197	0.864014	1.00756	1.1503	1.29492	1.43496	1.61977	1.89192	2.30376	2.99386	4.84324	9.46723	18.7891	31.3624	49.0179	104.821
0.0548641	0.134033	0.212364	0.246094	0.264533	0.328178	0.358211	0.445675	0.493812	0.550282	0.653174	0.744141	0.865247	1.01002	1.15287	1.30009	1.43496	1.62126	1.89307	2.31953	3.00769	4.93733	9.50703	19.15	31.373	49.1341	106.945
0.0548812	0.134075	0.212426	0.246094	0.266024	0.328435	0.35923	0.446517	0.494139	0.550282	0.65366	0.744393	0.867109	1.01163	1.15311	1.3057	1.43496	1.63256	1.89857	2.32164	3.03019	5.0953	9.82887	19.9849	31.7057	49.254	109.559
0.0552878	0.134116	0.21272	0.246094	0.267117	0.328849	0.35928	0.447499	0.495091	0.550282	0.655524	0.745798	0.867169	1.01467	1.1551	1.30643	1.43496	1.63424	1.91523	2.32164	3.03064	5.14702	9.86198	20.2269	31.8348	49.438
0.0553027	0.134169	0.213961	0.246094	0.268015	0.329422	0.359891	0.448176	0.496094	0.551013	0.660527	0.745805	0.870051	1.01467	1.16075	1.30744	1.43496	1.63667	1.92604	2.32875	3.04194	5.15185	10.0667	20.3084	32.2363	49.4774
0.0555367	0.134544	0.215004	0.246094	0.268663	0.329833	0.360255	0.44941	0.496094	0.551252	0.661401	0.746122	0.875297	1.01467	1.16272	1.31119	1.43496	1.64113	1.93904	2.35849	3.05246	5.18599	10.0742	20.3643	32.3156	49.5877
0.055889	0.135054	0.215061	0.246094	0.269092	0.330087	0.360416	0.449828	0.497975	0.551883	0.662169	0.748891	0.881756	1.01467	1.16366	1.31255	1.43496	1.64615	1.94427	2.3635	3.0924	5.22198	10.0928	20.379	32.7752	49.7905
0.0560706	0.135075	0.215266	0.246094	0.269215	0.331119	0.36049	0.450195	0.498057	0.551896	0.662257	0.750641	0.885047	1.01467	1.16422	1.31635	1.43515	1.64978	1.946	2.36451	3.13757	5.26022	10.6909	20.4945	32.9958	49.8283
0.0565309	0.135535	0.215452	0.246094	0.269305	0.331508	0.360605	0.450304	0.498097	0.553576	0.662628	0.752949	0.887304	1.01467	1.16463	1.31848	1.43547	1.65085	1.94649	2.38191	3.16242	5.26448	10.79	20.6036	33.3049	49.9927
0.0566663	0.135808	0.215709	0.246094	0.26965	0.333374	0.360737	0.450367	0.498922	0.554337	0.664021	0.753293	0.887304	1.01467	1.16625	1.32338	1.44953	1.65085	1.94753	2.4044	3.22461	5.26849	10.9594	20.7619	33.3079	50.0178
0.0567752	0.136043	0.216478	0.246094	0.27062	0.333529	0.36076	0.45171	0.502312	0.55465	0.667156	0.754305	0.887304	1.01467	1.16808	1.32526	1.45871	1.65085	1.95073	2.40447	3.23147	5.27666	11.0517	20.9148	33.3816	50.2619
0.0569037	0.136434	0.216637	0.246094	0.27123	0.334523	0.360902	0.452206	0.502677	0.55465	0.66784	0.754489	0.887304	1.01467	1.16837	1.32526	1.46153	1.6528	1.95615	2.4149	3.23686	5.38863	11.057	21.0465	33.7417	50.267
0.0569914	0.136525	0.217524	0.246094	0.271288	0.334883	0.362273	0.452304	0.504155	0.55465	0.66795	0.755962	0.887304	1.01467	1.17363	1.32526	1.46641	1.66257	1.9678	2.42399	3.25221	5.41365	11.06	21.1914	34.1113	50.6951
0.0570165	0.136627	0.217833	0.246094	0.272937	0.334979	0.363671	0.452949	0.505729	0.55465	0.668138	0.759286	0.887304	1.01467	1.1741	1.32526	1.46881	1.66411	1.99064	2.43644	3.28801	5.41844	11.323	21.3639	34.2583	50.8972
0.0570498	0.136855	0.218176	0.246094	0.275115	0.335332	0.364646	0.45303	0.505906	0.554758	0.669894	0.759372	0.887304	1.01467	1.17676	1.32526	1.46987	1.68354	2.00325	2.46094	3.29676	5.47953	11.392	21.4903	34.4022	50.9003
0.0571725	0.137609	0.218949	0.246094	0.276602	0.338459	0.364675	0.453419	0.50602	0.554762	0.675347	0.759464	0.887304	1.01467	1.1791	1.32526	1.47278	1.69006	2.00842	2.46437	3.30936	5.50753	11.5068	21.5367	34.4685	50.9989
0.0572532	0.138081	0.219453	0.246094	0.2771	0.338699	0.366663	0.454446	0.506275	0.555112	0.676638	0.760711	0.887304	1.01467	1.1864	1.32526	1.47656	1.69234	2.01214	2.47599	3.37964	5.52447	11.7634	21.5736	34.4852	51.1208
0.0572734	0.13809	0.219459	0.246094	0.277509	0.339769	0.367262	0.456583	0.507609	0.557262	0.679098	0.761923	0.887304	1.01467	1.1885	1.32526	1.47656	1.70732	2.01341	2.47786	3.53458	5.95829	11.7788	22.4555	35.1185	51.2669
0.0575482	0.138548	0.220975	0.246094	0.278146	0.340058	0.367266	0.456752	0.508395	0.56462	0.679762	0.762405	0.887304	1.01467	1.18888	1.32526	1.47656	1.71887	2.02934	2.48614	3.56509	6.16969	11.8952	22.6439	35.2154	51.2978
0.0577672	0.139236	0.221102	0.246094	0.278622	0.342154	0.367286	0.458292	0.510776	0.564657	0.68173	0.76581	0.887304	1.01467	1.19547	1.3326	1.47877	1.72008	2.03034	2.48802	3.57958	6.20531	12.0586	22.6807	35.4542	51.4104
0.057878	0.13937	0.221354	0.246094	0.279251	0.342221	0.367962	0.462965	0.511166	0.565058	0.681761	0.771059	0.887304	1.01467	1.19591	1.33577	1.48678	1.72266	2.07841	2.50366	3.60978	6.21206	12.2071	23.0319	35.4568	51.416
0.0579974	0.139417	0.222057	0.246094	0.279537	0.343852	0.368737	0.464589	0.512373	0.567283	0.681957	0.771491	0.887304	1.01467	1.19617	1.33718	1.49017	1.73164	2.08555	2.51551	3.60988	6.30788	12.2327	23.0437	35.5879	51.5347
0.0580411	0.139595	0.222243	0.246094	0.279543	0.34556	0.368942	0.466135	0.512878	0.568692	0.684117	0.775096	0.887304	1.01467	1.20377	1.34326	1.49241	1.73619	2.08832	2.51914	3.61349	6.39525	12.3651	23.2312	35.654	51.5651
0.0581336	0.139886	0.222272	0.246094	0.280044	0.346673	0.36936	0.466603	0.513475	0.569211	0.690322	0.7782	0.887304	1.01467	1.20514	1.34484	1.49491	1.74015	2.09022	2.53885	3.83355	6.47372	12.4633	23.3115	35.687	51.5776
0.0583996	0.140072	0.222839	0.246094	0.280345	0.347438	0.370697	0.46714	0.513554	0.570128	0.693043	0.778217	0.887304	1.01467	1.20834	1.35258	1.49538	1.74015	2.10689	2.55164	3.85754	6.49185	12.5868	23.4856	35.7193	51.9153
0.0584084	0.140451	0.223201	0.246094	0.281181	0.347788	0.370719	0.469099	0.51725	0.570731	0.693154	0.778217	0.887304	1.01467	1.21392	1.35286	1.4958	1.74015	2.11698	2.55843	3.87131	6.52751	12.688	23.6358	35.8123	51.9437
0.0587502	0.140646	0.223242	0.246094	0.282571	0.348029	0.370863	0.469562	0.517697	0.57252	0.693625	0.778217	0.887304	1.01498	1.21856	1.35485	1.49683	1.74314	2.11698	2.56851	3.88255	6.55615	12.7412	24.0707	35.9081	52.1276
0.0588437	0.140833	0.223444	0.246094	0.283773	0.348029	0.372488	0.469979	0.517754	0.572597	0.69413	0.778217	0.890857	1.01867	1.21917	1.36465	1.49693	1.74373	2.11867	2.56929	3.90741	6.64025	12.8502	24.1253	35.9339	52.2491
0.0589692	0.140898	0.223518	0.246094	0.284177	0.348029	0.373206	0.471129	0.522334	0.573001	0.694419	0.778217	0.891743	1.023	1.2225	1.36485	1.49693	1.75052	2.11931	2.58496	3.94212	6.79153	12.984	24.6071	35.9676	53.2198
0.0589888	0.141265	0.223915	0.246094	0.284523	0.348029	0.374356	0.472865	0.528926	0.573527	0.695514	0.778217	0.894056	1.02313	1.22263	1.36648	1.49693	1.75153	2.11945	2.58921	3.94671	6.80662	13.0069	24.7328	36.3636	53.5138
0.0590258	0.141268	0.224618	0.246094	0.285678	0.348029	0.374822	0.473821	0.530571	0.575368	0.695556	0.778217	0.894346	1.02423	1.22367	1.36692	1.49693	1.76048	2.14046	2.61483	3.96022	6.81113	13.1721	24.75	36.5335	54.0261
0.059628	0.141423	0.225395	0.246094	0.285696	0.348029	0.375118	0.474753	0.532291	0.581175	0.696058	0.778217	0.897996	1.02488	1.22505	1.36787	1.50023	1.76325	2.14181	2.62943	3.96101	6.92947	13.2049	24.755	36.6581	54.3477
0.059636	0.141603	0.225573	0.246094	0.286409	0.348029	0.376515	0.474841	0.532458	0.585652	0.696058	0.778217	0.898486	1.0282	1.2256	1.37201	1.50523	1.77461	2.15315	2.63272	4.0685	7.01329	13.3573	24.7587	36.88	54.3832
0.0599037	0.142642	0.225614	0.246094	0.288624	0.348029	0.377521	0.475377	0.534446	0.586782	0.696058	0.778217	0.901478	1.02964	1.22704	1.37607	1.51097	1.77776	2.15522	2.65244	4.09136	7.05432	13.477	24.9139	36.8977	54.6072
0.0601679	0.142699	0.225867	0.246094	0.289515	0.348029	0.377818	0.475995	0.536111	0.587509	0.696058	0.778217	0.903085	1.03369	1.23047	1.38201	1.51547	1.78151	2.15718	2.65703	4.11408	7.10404	13.5143	24.9515	36.943	54.7142
0.0605379	0.143077	0.22658	0.246094	0.289523	0.348029	0.378552	0.476394	0.5367	0.589001	0.696058	0.778217	0.905292	1.03876	1.23047	1.38637	1.51695	1.78417	2.17342	2.67608	4.18252	7.15276	13.5887	25.2615	37.0222	54.7361
0.0608018	0.143574	0.226606	0.246094	0.289951	0.348029	0.379023	0.478111	0.536915	0.589601	0.696058	0.778217	0.906078	1.04122	1.23047	1.39151	1.52198	1.78421	2.17635	2.69202	4.23546	7.27961	13.6321	25.3539	37.2313	54.7904
0.0611672	0.1437	0.226882	0.246094	0.290407	0.348029	0.379025	0.479331	0.536949	0.590123	0.696058	0.778217	0.907329	1.04235	1.23047	1.39194	1.52213	1.79535	2.18731	2.70077	4.26177	7.41963	13.6547	25.6543	37.2448	54.9215
0.0611781	0.14372	0.227063	0.246094	0.290674	0.348029	0.379172	0.48006	0.538497	0.592495	0.696058	0.778217	0.908875	1.04409	1.23047	1.39212	1.52476	1.80581	2.1903	2.72445	4.33248	7.45792	13.7911	25.7155	37.2739	55.163
0.0612949	0.144039	0.227082	0.246094	0.291007	0.348029	0.380288	0.481873	0.540835	0.592569	0.696058	0.778217	0.909594	1.04409	1.23047	1.39212	1.55214	1.80581	2.20113	2.72502	4.43961	7.51064	13.8842	25.7294	37.3335	55.3273
0.0614584	0.144041	0.228236	0.246094	0.291057	0.348029	0.380305	0.481883	0.542093	0.592627	0.696058	0.778217	0.914052	1.04409	1.23047	1.3942	1.55334	1.80581	2.20583	2.75141	4.44521	7.53021	13.8869	25.7992	37.6148	55.5585
0.0614981	0.144068	0.228752	0.246094	0.29171	0.348029	0.380906	0.481943	0.542499	0.593041	0.696145	0.778217	0.914105	1.04409	1.23047	1.39422	1.55361	1.80581	2.21484	2.75845	4.50616	7.58529	13.9701	25.8881	37.6937	56.2935
0.0615575	0.144283	0.22876	0.246094	0.291768	0.348029	0.38266	0.481969	0.542752	0.593779	0.699129	0.778217	0.916233	1.04409	1.23047	1.40099	1.55643	1.80825	2.21959	2.76032	4.59419	7.71487	14.0509	26.1787	37.6964	56.4268
0.0618709	0.144429	0.228863	0.246094	0.292885	0.348029	0.383595	0.48383	0.543524	0.59509	0.701716	0.778217	0.916845	1.04409	1.23047	1.40254	1.55643	1.83126	2.22847	2.77325	4.63057	7.78897	14.1975	26.3228	37.8724	56.8708
0.0620234	0.144892	0.229091	0.246094	0.295239	0.348029	0.384229	0.483892	0.544827	0.596177	0.704042	0.778217	0.917015	1.04409	1.23047	1.40255	1.55985	1.84281	2.22847	2.77325	4.68014	8.01223	14.2182	26.3574	38.173	57.4038
0.0623653	0.145715	0.229355	0.246094	0.296889	0.348029	0.384759	0.484177	0.545437	0.596434	0.705956	0.778217	0.918032	1.04409	1.23047	1.4042	1.56559	1.85687	2.24396	2.77602	4.69694	8.12482	14.3006	26.5885	38.2282	57.4195
0.0624478	0.146073	0.229755	0.246094	0.297393	0.348029	0.386918	0.485339	0.546157	0.598401	0.707314	0.778217	0.91998	1.04724	1.23047	1.4076	1.57166	1.86048	2.24634	2.77983	4.73893	8.16693	14.3575	26.7078	38.8235	57.586
0.062641	0.146469	0.229763	0.246094	0.297713	0.348029	0.38747	0.485889	0.548262	0.598573	0.708278	0.778217	0.92025	1.05316	1.23214	1.40925	1.57577	1.87316	2.25219	2.78036	4.85844	8.30957	14.3728	27.0217	38.9094	57.6995
0.0627062	0.146573	0.229975	0.246094	0.299409	0.348029	0.390528	0.48649	0.550282	0.59876	0.710553	0.778217	0.921874	1.05467	1.23275	1.41118	1.57577	1.8811	2.25616	2.78839	4.87796	8.47637	14.7059	27.1666	38.9458	57.7032
0.062781	0.147786	0.230452	0.246094	0.299441	0.348029	0.390919	0.486724	0.550282	0.598833	0.710759	0.778217	0.928446	1.05647	1.23935	1.4147	1.58519	1.89118	2.25763	2.80376	4.89152	8.49805	14.7823	27.2412	39.0352	59.0222
0.0630308	0.147871	0.230736	0.246094	0.299758	0.348029	0.392648	0.487483	0.550282	0.599051	0.711559	0.779272	0.92892	1.05674	1.2496	1.41498	1.6019	1.89729	2.26928	2.82878	4.92474	8.51343	15.0219	27.3341	39.2783	59.33
0.0631465	0.147951	0.231795	0.246094	0.300417	0.348029	0.393796	0.487753	0.550282	0.599587	0.711797	0.783396	0.931705	1.07266	1.25088	1.42119	1.60218	1.92048	2.27904	2.84125	4.97137	8.6168	15.0604	27.3441	39.2903	59.3416
0.0636324	0.14818	0.232094	0.246094	0.305015	0.348029	0.394816	0.487887	0.550282	0.601013	0.71238	0.784393	0.931939	1.07402	1.25278	1.42426	1.60606	1.92205	2.28884	2.8836	5.02278	8.72853	15.1091	27.5651	39.3872	59.7798
0.0637413	0.148346	0.232158	0.246094	0.305198	0.348029	0.396778	0.490767	0.550282	0.602128	0.712912	0.786602	0.932098	1.0749	1.25284	1.42595	1.61808	1.9285	2.3072	2.89224	5.04161	9.10879	15.1906	27.7157	39.7914	59.8302
0.0637706	0.148411	0.232713	0.246094	0.305498	0.348029	0.399744	0.492188	0.550282	0.602971	0.712991	0.792839	0.93504	1.07891	1.25484	1.4266	1.63102	1.94142	2.31381	2.90562	5.06967	9.15594	15.2422	27.7945	39.8434	60.2903
0.0637722	0.148512	0.233632	0.246094	0.30623	0.348029	0.40146	0.492188	0.550282	0.605117	0.713655	0.796369	0.936827	1.07921	1.25484	1.43496	1.65085	1.94947	2.31549	2.91227	5.07236	9.23121	15.8439	28.0078	39.9713	60.3272
0.0638769	0.148587	0.234137	0.246094	0.30794	0.348029	0.402154	0.492188	0.550282	0.607222	0.718547	0.799421	0.941193	1.07938	1.25484	1.43496	1.65941	1.95961	2.33148	2.94589	5.07302	9.3066	15.9974	28.2069	40.0018	60.8237
0.0639866	0.148595	0.234689	0.246094	0.308011	0.348029	0.404553	0.492188	0.550282	0.610564	0.720936	0.800307	0.955678	1.08033	1.25484	1.43496	1.66364	1.96492	2.3383	2.95387	5.17863	9.4247	16.2907	28.226	40.6254	61.2749
0.0642041	0.148595	0.235112	0.246094	0.308023	0.348029	0.405809	0.492188	0.550282	0.613154	0.727219	0.80097	0.956517	1.08122	1.25484	1.43496	1.66411	1.96694	2.34165	3.03756	5.23301	9.46295	16.2981	28.4491	40.7016	61.9985
0.0642678	0.148764	0.235587	0.246094	0.308027	0.348029	0.407398	0.492188	0.550282	0.614133	0.727767	0.801654	0.958118	1.09444	1.25484	1.43592	1.66569	1.96987	2.34504	3.05221	5.23486	9.59849	17.1791	28.5341	41.0116	62.036
0.0644634	0.148918	0.235601	0.246094	0.308224	0.348029	0.408162	0.492188	0.550282	0.615618	0.728712	0.80282	0.960763	1.09531	1.25484	1.43891	1.66798	1.97277	2.34974	3.07707	5.3567	9.73839	17.6627	28.5414	41.2234	62.3161
0.0645895	0.149695	0.236413	0.246094	0.309225	0.348029	0.410538	0.492188	0.550282	0.616431	0.731225	0.809601	0.960796	1.09592	1.25484	1.4475	1.66881	1.98407	2.35691	3.12224	5.4419	9.7975	18.0991	28.5488	41.4491	62.3861
0.0647452	0.149815	0.236504	0.246094	0.309361	0.348029	0.410573	0.492188	0.550282	0.616548	0.731543	0.80969	0.961537	1.09919	1.25484	1.4502	1.67953	1.98411	2.36101	3.13757	5.47953	9.86089	18.1495	28.6992	41.6313	63.5078
0.0647568	0.149944	0.236734	0.246094	0.309536	0.348029	0.410676	0.492188	0.550282	0.616814	0.733032	0.811322	0.962337	1.10018	1.25484	1.46748	1.68358	1.99753	2.36532	3.15215	5.62258	9.88816	18.2223	28.7457	41.651	64.4536
0.0647785	0.150753	0.236753	0.246094	0.31	0.348029	0.41213	0.492188	0.550282	0.617312	0.733286	0.812295	0.96452	1.10056	1.25484	1.46831	1.7061	2.00605	2.3758	3.20413	5.62763	9.91874	18.2305	28.8456	42.2903	64.5227
0.0651281	0.151102	0.237021	0.246094	0.311234	0.348029	0.412634	0.492188	0.550282	0.618322	0.733288	0.813986	0.965444	1.10056	1.25484	1.46898	1.71564	2.01229	2.37753	3.23686	5.71047	10.0172	18.3765	28.9209	42.3367	64.7421
0.0652487	0.151381	0.237343	0.246094	0.311668	0.348029	0.412795	0.492188	0.550282	0.618363	0.733654	0.81747	0.965827	1.10056	1.25591	1.47258	1.71941	2.01931	2.38083	3.24204	5.71047	10.0736	19.1362	29.1251	42.423	65.0001
0.0652811	0.1519	0.237344	0.246094	0.312304	0.348029	0.413552	0.492188	0.550282	0.620348	0.735228	0.823079	0.966731	1.10056	1.25719	1.47656	1.72266	2.02934	2.39035	3.30285	5.72927	10.0928	19.1543	29.2655	42.75	65.0441
0.0654639	0.151948	0.237885	0.246094	0.313104	0.348029	0.413779	0.492188	0.550282	0.620949	0.735305	0.823138	0.967212	1.10107	1.25855	1.47656	1.72266	2.04055	2.41437	3.30936	5.9165	10.1357	19.2974	29.3987	42.9308	65.2132
0.0654797	0.152336	0.238153	0.246094	0.313525	0.348029	0.416889	0.492188	0.550282	0.621159	0.738281	0.824116	0.969141	1.10687	1.26036	1.47656	1.72837	2.04209	2.41902	3.31139	5.95221	10.1832	19.318	29.5414	43.3467	65.5518
0.0655359	0.152928	0.238466	0.246094	0.313709	0.348029	0.416906	0.492188	0.550282	0.622626	0.738281	0.824718	0.971182	1.10809	1.26841	1.47656	1.7306	2.04371	2.42743	3.3157	5.96023	10.2549	19.7198	29.5592	43.6586	65.613
0.0656605	0.153314	0.238543	0.246094	0.313766	0.348029	0.417045	0.492188	0.550282	0.62289	0.738281	0.825878	0.971235	1.1093	1.27362	1.47662	1.7315	2.0551	2.4471	3.40093	6.1376	10.6662	19.8198	29.5696	43.7734	65.8577
0.0657775	0.153521	0.239714	0.246094	0.31485	0.348029	0.417149	0.492188	0.550282	0.623153	0.738281	0.830767	0.973302	1.1093	1.27439	1.47885	1.73451	2.06109	2.44982	3.42804	6.25235	10.8113	19.8459	29.6507	43.8355	65.9865
0.0659711	0.153597	0.239784	0.246094	0.314855	0.348029	0.417303	0.492188	0.550282	0.624476	0.738281	0.831631	0.975945	1.11338	1.27674	1.48102	1.74015	2.0798	2.46094	3.45489	6.2953	10.8737	19.9057	29.6738	43.9721	66.1255
0.0660977	0.154267	0.240353	0.246094	0.31507	0.348029	0.417819	0.492188	0.550282	0.627045	0.738281	0.832025	0.982942	1.11425	1.28113	1.48151	1.74015	2.09382	2.4743	3.45661	6.32329	10.9843	19.9954	29.7203	44.0508	66.159
0.0665356	0.154316	0.242439	0.246094	0.315629	0.348029	0.420891	0.492188	0.550282	0.627323	0.738281	0.83253	0.984375	1.11971	1.28936	1.48247	1.75282	2.10263	2.52703	3.46386	6.38567	11.267	20.0496	29.9905	44.598	66.9595
0.0666561	0.1548	0.242678	0.246094	0.315995	0.348029	0.422067	0.492188	0.550282	0.628428	0.738281	0.83423	0.984375	1.12917	1.29829	1.48966	1.76644	2.11698	2.55292	3.51215	6.41045	11.323	20.2619	30.2818	44.6066	67.436
0.0667211	0.154844	0.243024	0.246094	0.316147	0.348029	0.422426	0.492188	0.550282	0.628896	0.738281	0.834642	0.984375	1.13146	1.2985	1.49693	1.77057	2.11698	2.56591	3.51513	6.42737	11.3355	20.2754	30.8783	44.6937	67.6439
0.0668581	0.15492	0.243355	0.246094	0.316271	0.348029	0.423903	0.492188	0.550282	0.629677	0.738281	0.835514	0.984375	1.13275	1.29946	1.49693	1.773	2.1353	2.56929	3.59329	6.47372	11.3677	20.4392	30.9377	44.9208	67.8384
0.0668928	0.155345	0.24339	0.246094	0.318481	0.348913	0.42432	0.492188	0.550282	0.62974	0.738281	0.838572	0.984375	1.13697	1.30314	1.49693	1.78036	2.14351	2.5919	3.68479	6.50477	11.4003	20.5834	31.0177	44.9386	68.2683
0.0669702	0.155372	0.243602	0.246094	0.320184	0.349106	0.425112	0.492188	0.550282	0.629852	0.738281	0.840135	0.984375	1.13704	1.30613	1.49693	1.79159	2.14904	2.59408	3.7207	6.51568	11.4874	20.6272	31.0322	45.378	68.5027
0.0669702	0.155455	0.243756	0.246094	0.320835	0.349918	0.425577	0.492188	0.550282	0.629858	0.738281	0.843064	0.984375	1.13769	1.30629	1.49693	1.79876	2.15628	2.63416	3.77922	6.57968	11.9001	20.8256	31.0705	45.395	69.0193
0.0670876	0.155623	0.24487	0.246094	0.321134	0.350124	0.425724	0.492188	0.550282	0.631421	0.738281	0.846387	0.984375	1.13882	1.30636	1.5133	1.80105	2.1606	2.63845	3.86739	6.69729	12.0116	21.1597	31.5203	46.1194	69.8814
0.0672426	0.15564	0.245144	0.246094	0.321478	0.350178	0.426762	0.492188	0.550282	0.63307	0.738281	0.84684	0.984375	1.14162	1.31709	1.51378	1.80581	2.16629	2.64096	3.93499	6.76116	12.0329	21.4233	31.751	46.1343	69.9509
0.0674263	0.155671	0.245194	0.246094	0.321636	0.350791	0.427793	0.492188	0.550282	0.633389	0.738281	0.849285	0.984375	1.14197	1.32526	1.52034	1.80768	2.178	2.64535	3.93608	6.79942	12.0586	21.5067	32.1394	46.1969	70.9778
0.0674863	0.155784	0.245207	0.246094	0.32198	0.350791	0.427903	0.492188	0.550282	0.635819	0.738281	0.849675	0.984375	1.14496	1.32526	1.52574	1.81013	2.17835	2.66377	3.99821	6.81113	12.1765	21.882	32.3733	46.2241	71.2391
0.0676052	0.155926	0.246094	0.246094	0.322266	0.350791	0.428012	0.492188	0.550282	0.637173	0.738281	0.851402	0.984375	1.14635	1.32526	1.52648	1.81145	2.19676	2.67155	4.03565	6.87148	12.1889	22.0491	32.4803	46.2433	71.4549
0.0678313	0.156727	0.246094	0.246094	0.32241	0.351386	0.429125	0.492188	0.551404	0.640151	0.738281	0.853071	0.984375	1.15105	1.32526	1.53535	1.81777	2.19861	2.69242	4.03908	6.89508	12.441	22.1238	32.6177	46.4692	71.7843
0.0681103	0.156894	0.246094	0.246094	0.322912	0.351688	0.42954	0.492188	0.552958	0.641503	0.738281	0.854934	0.984375	1.15248	1.32526	1.54051	1.82254	2.20523	2.69709	4.0873	6.90147	12.4642	22.5969	32.6782	46.5552	71.8399
0.0685089	0.157024	0.246094	0.246094	0.323038	0.352738	0.4306	0.492188	0.554649	0.642481	0.738281	0.858071	0.984375	1.15395	1.32954	1.55511	1.82494	2.21022	2.70939	4.10591	6.92543	12.4989	22.8433	32.7624	47.0178	71.8637
0.0685626	0.157249	0.246094	0.2467	0.323142	0.354353	0.431386	0.492188	0.55465	0.642711	0.738427	0.859412	0.991189	1.15457	1.33264	1.55643	1.82742	2.21039	2.71819	4.11411	6.94858	12.5403	22.9651	32.7977	47.2015	72.045
0.0696947	0.157265	0.246094	0.246723	0.324109	0.354556	0.432928	0.492188	0.55465	0.643065	0.738522	0.86407	0.991298	1.15887	1.33353	1.55643	1.82833	2.21484	2.721	4.156	6.9662	12.6234	23.0091	32.8845	47.2575	72.9011
0.0698526	0.15774	0.246094	0.247114	0.324346	0.356051	0.434617	0.492188	0.55513	0.643998	0.738676	0.864646	0.993043	1.16421	1.33577	1.56248	1.82907	2.21484	2.73871	4.24588	7.15367	12.6343	23.0664	32.9353	47.2862	73.4106
0.0698955	0.158091	0.246094	0.248047	0.324881	0.356119	0.435057	0.492188	0.555232	0.64506	0.744141	0.864862	0.994298	1.16436	1.3431	1.57372	1.83506	2.24668	2.73976	4.26576	7.19763	12.7722	23.0776	33.1652	47.2919	73.8272
0.0699626	0.158361	0.246094	0.248047	0.325125	0.357051	0.435491	0.492188	0.55595	0.645723	0.744531	0.866607	1.00532	1.1695	1.34582	1.57577	1.8395	2.24803	2.75823	4.27872	7.20011	12.8845	23.1204	33.57	47.8775	74.1017
0.0704943	0.158485	0.246094	0.248047	0.326098	0.357389	0.435772	0.492188	0.557253	0.64683	0.74644	0.866976	1.00773	1.16955	1.34948	1.57586	1.84956	2.25252	2.75995	4.34071	7.21941	12.9015	23.471	33.6927	48.0347	74.5335
0.0705266	0.159681	0.246094	0.248047	0.326221	0.357542	0.43602	0.492545	0.5573	0.646849	0.749384	0.874122	1.00875	1.17806	1.35033	1.57701	1.89009	2.25413	2.77325	4.40065	7.30788	13.033	23.5279	33.8287	48.1032	75.2658
0.0706003	0.160383	0.246094	0.248047	0.32731	0.35767	0.440135	0.493412	0.557807	0.65053	0.749554	0.874874	1.01373	1.1847	1.35161	1.58016	1.89134	2.26937	2.77856	4.41188	7.44954	13.2049	23.5423	33.841	48.2539	75.3034
0.0707956	0.160854	0.246094	0.248047	0.327438	0.358385	0.440147	0.493485	0.560853	0.650789	0.753989	0.877495	1.01445	1.18488	1.35238	1.59781	1.89424	2.28251	2.78261	4.47828	7.48137	13.2328	23.5647	33.8663	48.5022	75.3553
0.0709028	0.161017	0.246094	0.248047	0.328228	0.360024	0.440877	0.493934	0.561051	0.65195	0.754574	0.87761	1.01467	1.18497	1.35273	1.60236	1.89983	2.28688	2.7946	4.49394	7.55613	13.4518	23.5691	33.9567	48.5235	76.2272
0.0711317	0.161106	0.246094	0.248047	0.328399	0.362852	0.444158	0.494752	0.561432	0.652198	0.755741	0.881921	1.01467	1.18609	1.35378	1.60592	1.9042	2.28733	2.80068	4.52227	7.63287	13.6029	23.6139	34.2146	48.5429	77.4887
0.0711892	0.162993	0.246094	0.248047	0.32998	0.364272	0.444508	0.495296	0.565683	0.652207	0.756683	0.882047	1.01467	1.19541	1.35417	1.61544	1.91267	2.28896	2.81693	4.59467	7.68484	13.6453	24.1485	34.3472	48.5798	77.565
0.0714132	0.164646	0.246094	0.248047	0.33166	0.364683	0.444779	0.495673	0.566158	0.652285	0.757815	0.882787	1.01467	1.20475	1.36363	1.62616	1.92205	2.29108	2.8247	4.62368	7.6984	13.655	24.2207	34.4118	48.6356	82.1765
0.0715223	0.164683	0.246094	0.248808	0.331887	0.364997	0.44683	0.496094	0.566893	0.653427	0.758414	0.88335	1.01467	1.2048	1.37302	1.63102	1.92205	2.29454	2.82597	4.63647	7.75801	13.6988	24.3905	34.4821	48.646	84.0615
0.0718645	0.16473	0.246094	0.249266	0.331992	0.365239	0.447196	0.496094	0.56745	0.655397	0.759743	0.884071	1.01467	1.21047	1.37622	1.63164	1.94606	2.30181	2.83547	4.71512	7.77327	13.7952	24.5373	34.5873	48.9352	85.6059
0.0718943	0.164862	0.246094	0.24981	0.332126	0.366067	0.447936	0.496094	0.567822	0.659607	0.760195	0.885247	1.01467	1.21479	1.38092	1.63211	1.95688	2.30347	2.84361	4.71699	7.97109	13.8387	24.6211	34.7892	48.9426	86.6818
0.072347	0.164975	0.246094	0.249943	0.333029	0.366082	0.448937	0.498122	0.568135	0.665075	0.761127	0.886239	1.01467	1.21923	1.38142	1.63402	1.96499	2.32288	2.85397	4.73893	8.26383	13.8536	24.641	34.8177	49.57	86.8195
0.0723822	0.165091	0.246094	0.250051	0.333314	0.366255	0.449117	0.500666	0.568876	0.667806	0.76137	0.886785	1.01467	1.22133	1.38521	1.63946	1.96588	2.32841	2.8584	4.77174	8.35593	13.8947	24.954	34.9077	49.7638	88.5599
0.0724797	0.165158	0.246094	0.250111	0.333438	0.367937	0.450191	0.501608	0.569436	0.669693	0.763789	0.887304	1.01467	1.22325	1.39124	1.64201	1.96875	2.33261	2.85879	4.80101	8.37081	13.9058	24.9565	34.9462	49.7735	91.8167
0.0727465	0.165625	0.246094	0.251589	0.334905	0.368014	0.451598	0.503295	0.569942	0.671154	0.764571	0.887304	1.01467	1.22364	1.39212	1.64274	1.97679	2.33465	2.86525	4.81207	8.3888	14.0104	24.9894	35.3517	49.7951	94.8343
0.0733031	0.165884	0.246094	0.251992	0.335079	0.368481	0.452418	0.504433	0.570486	0.672644	0.765224	0.887304	1.01467	1.22811	1.39212	1.64627	1.99007	2.33663	2.87072	4.82865	8.55846	14.1226	25.3668	35.3598	49.8155	98.907
0.0733551	0.166051	0.246094	0.252303	0.337118	0.368537	0.452978	0.504755	0.571157	0.675093	0.770278	0.887304	1.01467	1.22849	1.39212	1.65085	1.99108	2.34284	2.88106	4.83211	8.60197	14.1903	25.4085	35.513	49.8367	99.6895
0.073459	0.166186	0.246094	0.252989	0.337435	0.369976	0.453296	0.506198	0.572948	0.675416	0.774277	0.887304	1.01467	1.22919	1.39288	1.65085	1.99391	2.35974	2.88833	4.86196	8.6827	14.3021	25.4353	35.5581	49.8813	100.708
0.0735327	0.166852	0.246094	0.253332	0.338172	0.370149	0.454072	0.509166	0.574995	0.67542	0.774361	0.887304	1.01467	1.23047	1.40158	1.66107	1.9999	2.36465	2.93216	4.89225	8.71347	14.4071	25.4912	35.6057	49.9191	102.405
0.0738281	0.166911	0.246094	0.253661	0.33855	0.370666	0.454415	0.51038	0.576141	0.675984	0.775484	0.887304	1.01467	1.23047	1.40311	1.66183	2.00896	2.369	2.95716	4.91464	8.76815	14.6573	25.5494	35.8228	50.0354	104.075
0.0738405	0.1673	0.246094	0.254056	0.33945	0.371516	0.454466	0.510416	0.576244	0.676464	0.778217	0.887304	1.01467	1.23047	1.40712	1.66233	2.011	2.41611	2.96335	4.92142	8.86964	14.6722	25.6088	36.3487	50.0811	104.338
0.0738418	0.167354	0.246094	0.256679	0.340163	0.372482	0.455554	0.511742	0.578413	0.680554	0.778217	0.887304	1.01467	1.23047	1.4284	1.66611	2.01256	2.41724	2.97369	4.9393	9.10879	14.7021	25.7053	36.4141	50.1077	107.241
0.0741331	0.167532	0.246094	0.256801	0.34047	0.373196	0.455604	0.512886	0.578517	0.681167	0.778217	0.887304	1.01467	1.23047	1.4287	1.67291	2.01961	2.43735	2.97878	5.03505	9.11017	15.2394	25.7435	36.47	50.119
0.0742156	0.167625	0.246094	0.25696	0.341054	0.374018	0.455778	0.514023	0.579729	0.68362	0.778217	0.887304	1.01467	1.23047	1.42991	1.67834	2.02308	2.46018	2.98945	5.06627	9.39325	15.271	25.9071	36.5604	50.2239
0.074287	0.16771	0.246094	0.256964	0.342443	0.374446	0.458145	0.515947	0.581096	0.688689	0.778217	0.887304	1.01467	1.23047	1.43496	1.68021	2.04379	2.46094	3.06013	5.07885	9.60025	15.4256	25.9438	36.6215	50.2794
0.0743539	0.167963	0.246094	0.25699	0.342446	0.375016	0.45962	0.516689	0.581296	0.691686	0.778217	0.888111	1.02068	1.23047	1.43496	1.68753	2.05409	2.4747	3.08942	5.18675	9.72979	15.8405	25.9931	36.8122	50.3266
0.0745581	0.168137	0.246094	0.257421	0.34366	0.37517	0.460989	0.517546	0.582797	0.692677	0.778217	0.892166	1.0249	1.23047	1.43496	1.68919	2.05438	2.48379	3.10545	5.19812	9.79271	16.1567	26.0542	37.1732	50.4512
0.0746728	0.168211	0.246094	0.257736	0.345664	0.375841	0.462523	0.518053	0.582809	0.69478	0.778217	0.894346	1.02697	1.23047	1.43496	1.71064	2.05442	2.48944	3.12423	5.21463	9.88692	16.4753	26.2666	37.1996	50.507
0.0748119	0.169195	0.246094	0.259453	0.346005	0.376791	0.465017	0.51882	0.583715	0.695405	0.778217	0.897703	1.02722	1.23047	1.43496	1.71346	2.05602	2.50282	3.17321	5.23255	10.0387	16.9699	26.3093	37.209	51.1392
0.075114	0.169712	0.246094	0.25946	0.346044	0.377456	0.466778	0.519394	0.583938	0.696058	0.778217	0.899327	1.02731	1.23047	1.43625	1.72225	2.0588	2.50776	3.17976	5.31243	10.0898	17.0004	26.6577	37.2807	51.2339
0.0752436	0.170108	0.246094	0.259757	0.347143	0.377728	0.467377	0.519491	0.583963	0.696058	0.778217	0.900016	1.02941	1.23047	1.44435	1.72266	2.09235	2.51745	3.20402	5.4237	10.0928	17.4274	26.6703	37.3657	51.6706
0.0756085	0.170199	0.246094	0.259816	0.348029	0.378105	0.468212	0.519646	0.584457	0.696058	0.778217	0.901223	1.03345	1.23047	1.44546	1.72266	2.10263	2.53107	3.3049	5.43639	10.1284	17.5	26.7718	37.3821	51.7928
0.0757498	0.170701	0.246094	0.260015	0.348029	0.379216	0.468719	0.520926	0.587612	0.696058	0.778217	0.902748	1.0391	1.23047	1.44587	1.72266	2.10794	2.55102	3.30868	5.44746	10.1467	17.5926	26.9737	37.3943	51.9598
0.0758209	0.170994	0.246094	0.260361	0.348029	0.379342	0.469205	0.521017	0.587645	0.696058	0.778217	0.902977	1.04409	1.23047	1.45007	1.73224	2.11009	2.55154	3.30936	5.47953	10.2297	18.2024	27.0101	37.4642	51.9953
0.0758337	0.171186	0.246094	0.260711	0.348029	0.379355	0.469744	0.521111	0.589207	0.696058	0.778217	0.903872	1.04409	1.23047	1.45456	1.7329	2.11698	2.55167	3.34676	5.54777	10.4651	18.3666	27.0239	37.6917	52.0732
0.0758541	0.171488	0.246094	0.261478	0.348029	0.383049	0.470476	0.522433	0.589863	0.696058	0.778217	0.907883	1.04409	1.23054	1.4549	1.7337	2.11698	2.57597	3.3738	5.55213	10.5744	18.8853	27.1013	38.1314	52.3095
0.0759607	0.171495	0.246094	0.261948	0.348029	0.386107	0.470957	0.52461	0.592827	0.696058	0.778217	0.90966	1.04409	1.23377	1.45645	1.74015	2.12157	2.57891	3.44985	5.62284	10.678	18.9373	27.1541	38.1598	52.5186
0.0762141	0.171546	0.246094	0.261974	0.348029	0.387891	0.473716	0.525727	0.593158	0.696058	0.778217	0.913687	1.04426	1.23995	1.45679	1.74015	2.12488	2.58544	3.45489	5.67639	10.7481	18.9984	27.1822	38.2079	52.5374
0.0762439	0.171572	0.246094	0.262277	0.348029	0.388555	0.474624	0.52574	0.593938	0.698515	0.778217	0.917048	1.04845	1.24014	1.4647	1.74203	2.1395	2.58637	3.49642	5.71047	10.7521	19.5146	27.3682	38.2341	52.7836
0.0763828	0.171834	0.246094	0.262893	0.348029	0.38906	0.474702	0.530313	0.594779	0.700242	0.778217	0.920522	1.04899	1.24023	1.46849	1.7529	2.14236	2.58969	3.5186	5.79565	10.7986	19.5249	27.3707	38.5544	53.7558
0.0766938	0.171932	0.246094	0.263277	0.348029	0.390242	0.478419	0.531023	0.5957	0.701583	0.778217	0.922104	1.05032	1.24199	1.47	1.76172	2.15175	2.59306	3.52485	5.79718	10.8754	19.6872	27.391	38.6603	53.9641
0.0769779	0.172347	0.246094	0.263839	0.348029	0.390345	0.478738	0.532032	0.600252	0.701583	0.778217	0.922404	1.05115	1.24637	1.47617	1.76552	2.16056	2.59406	3.63353	5.85455	11.0287	19.7597	27.4521	39.0139	54.363
0.0772943	0.172485	0.246094	0.264183	0.348029	0.390776	0.479797	0.533967	0.601086	0.701747	0.778217	0.928418	1.05133	1.24696	1.47656	1.76646	2.16274	2.59889	3.66832	5.89153	11.0653	19.859	27.8385	39.0169	54.7496
0.0773666	0.172605	0.246094	0.264417	0.348029	0.390822	0.480675	0.534491	0.601582	0.702441	0.778217	0.928641	1.05372	1.24943	1.47807	1.76821	2.16766	2.60119	3.68748	5.91948	11.0924	19.9081	28.0212	39.0406	54.7953
0.0776916	0.173165	0.246094	0.265062	0.348029	0.391093	0.483711	0.535912	0.602022	0.705255	0.778217	0.928804	1.05715	1.25	1.49247	1.77668	2.169	2.60308	3.70764	6.16918	11.1865	20.026	28.086	39.1072	54.9274
0.0777963	0.173239	0.246094	0.265139	0.348029	0.392297	0.483941	0.535996	0.60209	0.706461	0.778217	0.929156	1.05746	1.25292	1.49384	1.77732	2.17267	2.60493	3.71298	6.19648	11.2546	20.0339	28.2244	39.1104	55.1217
0.0777972	0.174	0.246094	0.265159	0.348029	0.392603	0.484526	0.538417	0.602339	0.707373	0.778217	0.930642	1.05923	1.25484	1.49668	1.78642	2.17622	2.63763	3.71909	6.25957	11.2579	20.153	28.3823	39.1145	55.2144
0.0778841	0.174043	0.246094	0.265391	0.348029	0.392782	0.485602	0.538757	0.604705	0.707744	0.778704	0.931288	1.06379	1.25484	1.49693	1.79132	2.185	2.64191	3.7207	6.36315	11.3099	20.1632	28.4066	39.2308	55.2364
0.0779454	0.174211	0.246094	0.266744	0.348029	0.393229	0.486827	0.539901	0.605152	0.707838	0.782407	0.931367	1.06519	1.25484	1.49693	1.79159	2.19215	2.64195	3.72896	6.36573	11.323	20.2695	28.5449	39.4513	55.7175
0.0781747	0.174618	0.246094	0.266935	0.348029	0.394314	0.48833	0.539989	0.605653	0.711082	0.784052	0.931917	1.06782	1.25484	1.49693	1.79893	2.20113	2.66191	3.75363	6.51957	11.372	20.3946	28.8068	39.4589	56.1554
0.0785068	0.17511	0.246094	0.267017	0.348029	0.394423	0.491335	0.540489	0.607137	0.715168	0.784393	0.936252	1.069	1.25484	1.49693	1.80505	2.20646	2.67363	3.75736	6.5288	11.4216	20.4718	28.8518	39.5467	56.2008
0.0786566	0.175598	0.246094	0.267714	0.348029	0.396934	0.492188	0.541741	0.608624	0.71709	0.785593	0.940085	1.07951	1.25484	1.49693	1.80581	2.21484	2.67631	3.76451	6.59288	11.4416	20.7171	29.0417	39.6974	56.3509
0.0787174	0.175815	0.246094	0.268737	0.348029	0.397358	0.492188	0.541997	0.609437	0.717403	0.787092	0.941317	1.08039	1.25484	1.49693	1.81324	2.21484	2.6776	3.80589	6.66274	11.5765	20.8766	29.0766	39.7789	56.4215
0.0788555	0.177369	0.246094	0.269871	0.348029	0.399024	0.492188	0.542255	0.61409	0.719051	0.788709	0.941402	1.08664	1.25484	1.49693	1.81379	2.21688	2.69199	3.8266	6.66455	11.6627	20.9057	29.1105	39.9312	56.6367
0.0788918	0.178004	0.246094	0.270261	0.348029	0.399073	0.492188	0.542297	0.61424	0.719703	0.792311	0.945622	1.08695	1.25484	1.49693	1.81905	2.21725	2.73267	3.85072	6.68332	11.7995	21.0491	29.2281	39.9467	56.9667
0.0789502	0.178642	0.246094	0.271072	0.348029	0.399381	0.492188	0.542484	0.615818	0.719982	0.792318	0.94616	1.0878	1.25484	1.49693	1.82131	2.21766	2.73463	3.86224	6.69727	11.9514	21.1949	29.2533	40.6085	57.5157
0.0790043	0.179514	0.246094	0.272476	0.348029	0.400785	0.492188	0.544808	0.616201	0.722801	0.793829	0.946358	1.09338	1.25484	1.50138	1.82173	2.22494	2.73937	3.86923	6.81052	11.9599	21.2051	29.3925	40.6971	57.5352
0.0791537	0.179801	0.246094	0.272769	0.348029	0.401191	0.492188	0.545449	0.617877	0.724707	0.793941	0.948248	1.09384	1.25731	1.50767	1.84922	2.23284	2.76133	3.86987	6.81113	12.0281	21.217	29.4133	40.7959	57.803
0.0792236	0.180673	0.246094	0.272777	0.348029	0.401285	0.492188	0.545891	0.618401	0.724717	0.794444	0.949202	1.10056	1.26001	1.51167	1.85474	2.23635	2.77325	3.86987	6.8408	12.1729	21.307	29.5161	41.2838	57.8112
0.0792294	0.18095	0.246094	0.272884	0.348029	0.401406	0.492188	0.545939	0.618732	0.725169	0.794652	0.951714	1.10056	1.26192	1.52574	1.86571	2.24616	2.77418	3.87	6.99793	12.1731	21.3811	29.5692	41.4352	58.062
0.0796918	0.180986	0.246094	0.272978	0.348029	0.401836	0.492188	0.546047	0.621651	0.733481	0.79546	0.952882	1.10056	1.2648	1.52988	1.8831	2.24912	2.77779	3.92197	7.03509	12.1947	21.4822	29.7295	41.7443	58.2659
0.079692	0.181451	0.246094	0.273334	0.348029	0.403016	0.492188	0.547445	0.622939	0.733502	0.795532	0.953695	1.10056	1.26482	1.53173	1.89497	2.25521	2.79699	4.00418	7.0941	12.3047	21.6307	29.8261	41.7808	58.3545
0.0797809	0.182366	0.246094	0.274658	0.348029	0.404171	0.492188	0.549935	0.624799	0.734351	0.798512	0.954036	1.10056	1.27304	1.53836	1.91394	2.2708	2.8143	4.04206	7.32636	12.6169	21.905	30.2231	41.862	58.8269
0.0798191	0.182447	0.246094	0.274719	0.348029	0.405655	0.492188	0.5501	0.625289	0.736027	0.803283	0.954263	1.10056	1.27744	1.54179	1.91826	2.28348	2.82402	4.09969	7.34236	12.6589	21.9146	30.3949	41.9483	58.9261
0.0801535	0.182547	0.246094	0.275393	0.348029	0.407035	0.492188	0.550282	0.625558	0.736762	0.80521	0.957668	1.10056	1.28273	1.54275	1.92205	2.28688	2.83179	4.20226	7.35841	12.7138	21.9721	30.4251	42.131	60.075
0.0802026	0.18287	0.246094	0.276332	0.348029	0.408289	0.492188	0.550282	0.625647	0.738281	0.805801	0.961127	1.10056	1.28524	1.5447	1.92205	2.28688	2.83225	4.20525	7.38691	12.8319	22.3738	30.5046	42.2035	60.3823
0.0802435	0.183135	0.246094	0.276552	0.348029	0.408613	0.492188	0.550282	0.626611	0.738281	0.806678	0.964544	1.10237	1.28595	1.55381	1.92205	2.29741	2.85059	4.23285	7.39202	12.8327	22.5683	30.5081	42.6208	60.4227
0.0805599	0.183286	0.246094	0.27703	0.348029	0.408711	0.492188	0.550282	0.626948	0.738281	0.807178	0.965381	1.10428	1.29653	1.55643	1.92722	2.31271	2.85203	4.24588	7.44833	12.8935	22.6166	30.8289	42.7066	60.5617
0.0807365	0.183699	0.246094	0.277034	0.348029	0.408712	0.492188	0.550282	0.627453	0.738281	0.809602	0.969432	1.10446	1.29869	1.55643	1.92793	2.31328	2.85751	4.31179	7.51961	13.0233	22.7224	31.0527	42.7761	60.9247
0.0809426	0.183908	0.246094	0.277577	0.348029	0.410317	0.492188	0.550282	0.627991	0.738281	0.810778	0.970986	1.10672	1.30497	1.55753	1.93822	2.33465	2.86174	4.33195	7.59474	13.1239	22.7381	31.0596	42.8196	61.3594
0.0813693	0.184201	0.246094	0.277582	0.348029	0.410361	0.492188	0.550282	0.629685	0.738281	0.811501	0.978205	1.1093	1.30979	1.56137	1.94601	2.34263	2.89084	4.33834	7.64258	13.4262	22.802	31.3236	43.0494	61.4025
0.0817462	0.184963	0.246094	0.278951	0.348029	0.410385	0.492188	0.550282	0.630292	0.738281	0.811538	0.982409	1.10947	1.31934	1.56865	1.9747	2.34541	2.90947	4.34218	7.64412	13.4518	22.8602	31.5296	43.0667	61.6166
0.0818231	0.18498	0.246094	0.279207	0.348029	0.41137	0.492188	0.550282	0.634371	0.738281	0.814103	0.984375	1.11085	1.31984	1.5715	1.97787	2.35318	2.91599	4.35205	7.97176	13.4518	22.888	31.6209	43.2994	61.658
0.0819231	0.186238	0.246094	0.279886	0.348029	0.411528	0.492188	0.550282	0.635621	0.738281	0.814581	0.984375	1.1138	1.32156	1.57577	1.9828	2.35861	2.91801	4.37978	8.02758	13.5887	22.8928	31.8295	43.4705	62.0266
0.0819306	0.186844	0.246094	0.280056	0.348029	0.413761	0.492188	0.550282	0.637804	0.738281	0.816061	0.984375	1.11827	1.32192	1.57577	1.98407	2.37605	2.91887	4.3914	8.13168	13.6786	22.9382	31.8708	43.5929	62.1232
0.0820501	0.186941	0.246094	0.280239	0.348029	0.414211	0.492188	0.550282	0.638817	0.738281	0.819168	0.984375	1.12967	1.32419	1.57577	1.98438	2.38196	2.9194	4.4058	8.15295	13.6943	23.335	31.9307	43.5959	62.3576
0.0822912	0.18714	0.246094	0.282693	0.348029	0.414315	0.492188	0.550282	0.640073	0.738281	0.820151	0.984375	1.13185	1.32452	1.57577	1.98466	2.39535	2.94168	4.41766	8.16461	13.7585	23.3631	31.9325	43.7781	62.519
0.0828723	0.187216	0.246094	0.283302	0.348029	0.415529	0.492188	0.550282	0.642998	0.738281	0.822551	0.984375	1.13668	1.32526	1.57577	1.99102	2.41477	2.95285	4.45505	8.20057	13.9071	23.4415	32.2492	44.4087	63.1137
0.0828742	0.187317	0.246094	0.283722	0.348029	0.417571	0.492188	0.550282	0.644687	0.738281	0.825457	0.984375	1.13684	1.32526	1.58196	1.9965	2.44679	2.95552	4.46748	8.22149	13.9505	23.5252	32.4501	44.4502	63.1396
0.0829005	0.187386	0.246094	0.28399	0.348029	0.417744	0.492188	0.550282	0.645939	0.738281	0.82563	0.984375	1.13968	1.32526	1.5901	1.99693	2.4498	2.96336	4.48244	8.28117	13.9897	23.5566	32.471	44.6278	63.8296
0.0829663	0.187668	0.246094	0.28404	0.348029	0.418503	0.492188	0.550282	0.646133	0.738281	0.829103	0.984375	1.14438	1.32526	1.59897	2.00342	2.46094	2.96476	4.49232	8.29626	13.9911	23.5618	32.5271	44.7798	63.8565
0.0832379	0.187735	0.246094	0.284644	0.348029	0.418565	0.492188	0.550282	0.648101	0.738281	0.830378	0.984375	1.14481	1.32526	1.60329	2.02183	2.47321	2.97626	4.49236	8.37081	14.0277	23.6192	32.9666	44.8523	64.0199
0.0833118	0.187963	0.246094	0.286185	0.348029	0.422254	0.492188	0.550282	0.648201	0.738281	0.831229	0.984375	1.14538	1.32992	1.60991	2.02679	2.47381	2.97656	4.49925	8.41081	14.2676	23.7809	33.0765	44.951	64.1867
0.0835293	0.188076	0.246094	0.288791	0.348029	0.422442	0.492188	0.550282	0.649161	0.738281	0.832473	0.984375	1.14728	1.332	1.61	2.02721	2.48541	2.98025	4.51904	8.45821	14.2954	23.8133	33.0897	45.3057	64.5386
0.0837653	0.188212	0.246094	0.289788	0.348029	0.422973	0.492188	0.550282	0.649826	0.738281	0.834811	0.984375	1.15564	1.33577	1.61513	2.02815	2.52098	3.06068	4.51908	8.55797	14.5293	23.8364	33.1026	45.3867	64.5728
0.0840172	0.189375	0.246094	0.29034	0.348029	0.42334	0.492188	0.550282	0.649842	0.738281	0.835939	0.984375	1.15584	1.33688	1.61967	2.03791	2.52352	3.08499	4.56358	8.59569	14.6325	23.8735	33.128	45.451	64.9524
0.0847064	0.189656	0.246094	0.2905	0.348029	0.42368	0.492188	0.550282	0.650061	0.738755	0.83635	0.988766	1.15633	1.33918	1.6197	2.04545	2.52615	3.09715	4.60257	8.66492	14.8891	24.0057	33.198	45.544	65.301
0.0847793	0.189735	0.246094	0.290597	0.348029	0.42476	0.492188	0.550282	0.651872	0.742791	0.837207	0.988766	1.15737	1.34292	1.62042	2.04592	2.52959	3.12109	4.62552	8.84696	15.5743	24.0595	33.3035	45.5931	65.5584
0.0849162	0.189895	0.246094	0.291007	0.348029	0.425837	0.492188	0.550282	0.654195	0.744141	0.837855	0.989576	1.16173	1.35027	1.62574	2.05944	2.52959	3.16947	4.65249	8.84848	15.8206	24.1675	33.3827	45.6559	65.9194
0.0850449	0.189938	0.246094	0.291506	0.348029	0.427157	0.492188	0.550282	0.654961	0.744554	0.838962	0.991195	1.16193	1.35247	1.62702	2.08003	2.52959	3.19922	4.65281	8.88382	16.0859	24.45	33.4117	45.7577	65.9337
0.0852027	0.190326	0.246094	0.291529	0.348029	0.427712	0.492188	0.550282	0.658329	0.748262	0.839093	0.991637	1.17004	1.35479	1.6276	2.09058	2.5304	3.20185	4.67745	8.92325	16.4702	24.7473	33.6393	45.8974	66.1173
0.0852445	0.190671	0.246094	0.292251	0.348029	0.428655	0.492188	0.550282	0.66095	0.748394	0.84558	0.992188	1.17514	1.36215	1.62789	2.09152	2.53228	3.21192	4.7076	9.10879	16.7918	24.7542	33.8854	45.9808	66.4202
0.0852527	0.191024	0.246094	0.292866	0.348029	0.42972	0.492188	0.550282	0.66244	0.749432	0.847895	0.996592	1.17621	1.36801	1.62814	2.09885	2.5403	3.22461	4.7699	9.18835	16.8803	24.8757	33.9462	46.1132	67.115
0.0853242	0.191298	0.246094	0.293543	0.348029	0.43006	0.492188	0.550282	0.662603	0.7502	0.856102	1.00147	1.17971	1.37167	1.63439	2.10745	2.54386	3.28016	4.78057	9.31406	16.9018	24.9157	34.071	46.1247	67.157
0.0855463	0.191518	0.246094	0.293902	0.348029	0.430444	0.492188	0.550282	0.663262	0.750349	0.856968	1.0017	1.18452	1.3747	1.63828	2.10874	2.54474	3.28617	4.83498	9.32522	17.0237	25.0403	34.099	46.1744	67.1626
0.0862285	0.191658	0.246094	0.294131	0.348029	0.431653	0.492188	0.550282	0.664429	0.753623	0.858587	1.00369	1.18738	1.37475	1.63898	2.12643	2.54759	3.32523	4.86265	9.36744	17.5827	25.0945	34.1479	46.2687	67.7083
0.0863211	0.191747	0.246094	0.294772	0.348029	0.431948	0.492188	0.550282	0.664684	0.755764	0.85936	1.00384	1.19097	1.39212	1.65085	2.12738	2.54792	3.33098	4.87006	9.5089	17.6438	25.0967	34.1574	46.6351	67.8099
0.0864294	0.191787	0.246094	0.295186	0.348029	0.432691	0.492188	0.550282	0.665103	0.757641	0.862459	1.00692	1.1911	1.39212	1.65167	2.13122	2.56375	3.33898	4.87854	9.52363	17.9926	25.2223	34.6424	46.8819	68.16
0.0864988	0.19187	0.246094	0.295222	0.348029	0.43345	0.492188	0.550282	0.6653	0.758584	0.863211	1.01055	1.1919	1.39212	1.65434	2.13728	2.56601	3.4286	4.89225	9.54034	18.072	25.257	34.8559	47.1452	68.3237
0.0865873	0.191889	0.246094	0.295341	0.348029	0.433625	0.492188	0.550282	0.666429	0.758932	0.863758	1.01112	1.19476	1.39212	1.65727	2.14288	2.56804	3.43154	4.89341	9.5596	18.084	25.3238	34.8926	47.2696	68.3435
0.0871603	0.191954	0.246094	0.295957	0.348029	0.434667	0.492188	0.550282	0.666719	0.761556	0.867444	1.01228	1.1965	1.39212	1.65799	2.14544	2.5759	3.44203	4.90795	9.57548	18.1008	25.4322	35.0128	47.2829	68.6056
0.0871853	0.191992	0.246094	0.29648	0.348029	0.434968	0.492188	0.550282	0.667878	0.761898	0.867515	1.01467	1.19759	1.39212	1.65849	2.1502	2.57925	3.44409	4.93934	9.70019	18.2109	25.536	35.071	47.3708	68.7749
0.0876994	0.192183	0.246094	0.296593	0.348029	0.435241	0.492188	0.552249	0.668967	0.76238	0.872741	1.01467	1.20073	1.39422	1.66395	2.15269	2.59253	3.45563	4.94338	9.70836	18.3993	25.5544	35.3153	47.4981	68.9557
0.0877597	0.19282	0.246094	0.297423	0.348029	0.435442	0.492727	0.55257	0.669815	0.762483	0.876094	1.01467	1.20092	1.39919	1.66492	2.15379	2.59865	3.46065	4.95283	9.84802	18.4793	25.5901	35.3218	47.6514	69.0236
0.0880005	0.193341	0.246094	0.297461	0.348029	0.43563	0.494817	0.553167	0.674388	0.762778	0.880191	1.01467	1.20615	1.3992	1.67262	2.15579	2.60642	3.47117	4.9583	9.89681	18.8584	25.7108	35.4214	47.6942	69.7795
0.0881109	0.194378	0.246094	0.297776	0.348029	0.436794	0.494817	0.553507	0.676041	0.762881	0.881748	1.01467	1.20998	1.40357	1.67872	2.16574	2.61093	3.53032	4.97266	9.89706	18.9108	25.7154	35.6785	47.6965	70.4705
0.0882119	0.194618	0.246094	0.298241	0.348029	0.437751	0.494841	0.55465	0.678502	0.763054	0.88229	1.01467	1.21296	1.40378	1.67904	2.17128	2.62597	3.54074	5.01644	9.96534	19.0109	25.721	35.7609	47.9099	70.9724
0.0882576	0.194635	0.246094	0.298285	0.348029	0.438652	0.496061	0.55465	0.682476	0.764564	0.883973	1.01467	1.21696	1.4057	1.68987	2.17249	2.64095	3.55149	5.01644	9.99493	19.023	25.7299	35.7953	47.9546	71.1536
0.088259	0.194805	0.246094	0.299021	0.348029	0.440161	0.496094	0.55465	0.683719	0.76625	0.884087	1.01467	1.22005	1.41036	1.6962	2.1953	2.64454	3.56	5.08285	10.0928	19.2907	25.8057	35.9661	47.9772	71.4379
0.0884556	0.195109	0.246094	0.29903	0.349181	0.440955	0.496094	0.55465	0.685033	0.766291	0.887304	1.01467	1.22453	1.41069	1.70334	2.20154	2.64634	3.56584	5.11105	10.1706	19.4393	25.9533	36.2995	48.0373	72.3621
0.0884802	0.195492	0.246094	0.300029	0.349662	0.441567	0.496094	0.555011	0.685958	0.769564	0.887304	1.01467	1.22748	1.41401	1.70417	2.20756	2.66435	3.56742	5.19135	10.1897	19.4782	26.2387	36.3672	48.4672	72.6672
0.0884905	0.195582	0.246094	0.300843	0.350381	0.441731	0.496094	0.555056	0.686186	0.772452	0.887304	1.01467	1.23047	1.4157	1.70716	2.21484	2.67155	3.60654	5.1939	10.1971	19.5548	26.4468	36.6262	48.512	72.9262
0.088641	0.196021	0.246094	0.301228	0.350791	0.443132	0.496094	0.555421	0.687653	0.772573	0.887304	1.01467	1.23047	1.41623	1.70798	2.21484	2.67463	3.60887	5.2414	10.2895	19.6075	26.4708	36.7624	48.5138	73.3074
0.088683	0.196156	0.246094	0.301368	0.350791	0.444283	0.49667	0.55737	0.69026	0.77341	0.887304	1.01467	1.23047	1.4167	1.72266	2.21484	2.68384	3.61162	5.26088	10.3187	19.7418	26.6628	36.8881	48.6079	73.3252
0.0888931	0.196173	0.246094	0.301522	0.350791	0.445355	0.499715	0.55836	0.690347	0.778217	0.887304	1.01467	1.23047	1.42458	1.72421	2.21615	2.69738	3.65845	5.28636	10.3389	19.9507	26.7711	36.9346	48.6457	73.5686
0.0892012	0.19688	0.246094	0.302131	0.350791	0.447768	0.499728	0.560976	0.693313	0.778217	0.887304	1.01467	1.23047	1.43046	1.73219	2.22027	2.69918	3.68748	5.31243	10.4155	19.9918	26.8344	36.9425	48.6987	73.6427
0.0896002	0.197169	0.246094	0.304149	0.350791	0.450288	0.502472	0.561825	0.693544	0.778217	0.887304	1.01467	1.23047	1.43105	1.73633	2.22241	2.70108	3.69598	5.31426	10.5374	20.2315	26.8994	37.005	48.757	75.0567
0.0902398	0.197516	0.246094	0.30427	0.350791	0.450339	0.502625	0.562534	0.695532	0.778217	0.887304	1.01467	1.23047	1.4333	1.74015	2.22402	2.70912	3.71309	5.31874	10.5552	20.3975	26.9473	37.0982	48.8451	76.1285
0.0902752	0.197575	0.246094	0.304573	0.351336	0.450636	0.502848	0.563825	0.696058	0.778217	0.887304	1.01467	1.23047	1.43496	1.74015	2.23195	2.72143	3.7207	5.36598	10.6401	20.689	26.9738	37.1315	48.8795	80.4994
0.0902908	0.198413	0.246094	0.304652	0.35308	0.450742	0.504624	0.566177	0.696058	0.778217	0.887304	1.01467	1.23047	1.43496	1.74015	2.23921	2.73026	3.72896	5.40565	10.7986	20.7012	27.0804	37.1658	48.898	82.719
0.0903825	0.19883	0.246094	0.307329	0.353325	0.451326	0.504712	0.571816	0.696058	0.778217	0.887951	1.01467	1.23047	1.43496	1.74015	2.24616	2.74329	3.75363	5.46399	11.0603	20.8559	27.0828	37.309	49.1238	84.8318
0.0905545	0.19901	0.246094	0.307609	0.353463	0.451763	0.507242	0.572686	0.696058	0.778217	0.891115	1.01467	1.23047	1.43496	1.74015	2.24616	2.74717	3.79181	5.51414	11.0749	20.9599	27.272	37.4465	49.3507	85.7464
0.0907224	0.199238	0.246094	0.307767	0.35355	0.452422	0.507683	0.573365	0.696058	0.778217	0.891973	1.01467	1.23047	1.43496	1.75728	2.2491	2.75857	3.8204	5.54435	11.1512	20.9839	27.3175	37.5145	49.4749	86.1014
0.0907486	0.199271	0.246094	0.308027	0.354064	0.454102	0.510783	0.573383	0.696058	0.778217	0.892307	1.02184	1.23047	1.43496	1.75912	2.26283	2.77327	3.85072	5.69362	11.2282	21.0046	27.401	37.5148	49.9185	86.3856
0.0907549	0.199413	0.246094	0.308222	0.354738	0.457731	0.513328	0.574968	0.696058	0.778217	0.893006	1.02288	1.23047	1.43496	1.76956	2.27231	2.77333	3.8703	5.7081	11.2869	21.2038	27.4762	37.5157	50.0194	86.6224
0.0907549	0.199513	0.246094	0.30836	0.354837	0.457832	0.513575	0.57586	0.696058	0.778217	0.894346	1.02415	1.23047	1.44185	1.77294	2.27525	2.7928	3.88255	5.71047	11.331	21.2248	27.6134	37.5942	50.1581	89.4056
0.0908419	0.199515	0.246094	0.30972	0.355719	0.458851	0.513825	0.577079	0.696058	0.778217	0.894346	1.02436	1.23047	1.44275	1.77456	2.28292	2.79462	3.89016	5.74519	11.3619	21.2642	27.7636	37.7297	50.1621	91.7969
0.0909017	0.200055	0.246094	0.309902	0.35658	0.459324	0.514331	0.577543	0.696058	0.778217	0.894346	1.02608	1.23047	1.44683	1.78216	2.28817	2.8059	3.89279	5.83065	11.3846	21.2833	27.9199	37.8252	50.2018	94.6396
0.0910547	0.200301	0.246094	0.310852	0.356693	0.463282	0.515728	0.579327	0.696058	0.778217	0.897282	1.02838	1.23047	1.44701	1.79154	2.29789	2.8152	3.90749	5.87954	11.4565	21.3521	28.0035	37.9664	50.248	95.9842
0.0910635	0.200442	0.246094	0.311001	0.356784	0.46332	0.517146	0.579329	0.696058	0.778217	0.89783	1.02951	1.23047	1.44956	1.79159	2.3101	2.83787	3.91809	5.9822	11.569	21.3976	28.0743	38.4032	50.3049	96.8759
0.0912132	0.200907	0.246094	0.311701	0.356816	0.463525	0.517465	0.579478	0.696058	0.778217	0.898003	1.03243	1.23047	1.45645	1.79401	2.31102	2.84558	3.92197	6.0645	11.6682	21.4163	28.5649	38.4048	50.3052	98.303
0.0915632	0.201037	0.246094	0.312235	0.357242	0.464254	0.519806	0.579655	0.696058	0.778217	0.899049	1.03654	1.23081	1.46518	1.7953	2.31302	2.8547	3.92197	6.20613	11.701	21.6437	28.6591	38.493	50.4762	99.3174
0.0917907	0.201429	0.246094	0.313081	0.35792	0.464878	0.520685	0.581643	0.696058	0.778217	0.902832	1.03985	1.23505	1.46677	1.80054	2.33697	2.86701	3.92197	6.2417	11.9049	21.7737	28.6723	38.5672	50.6938	99.808
0.0920122	0.201692	0.246094	0.313235	0.357964	0.46535	0.520701	0.581645	0.696058	0.778217	0.906462	1.04243	1.23803	1.4709	1.80581	2.35382	2.86707	3.92197	6.32559	12.1675	21.8152	28.7194	38.58	51.1618	102.036
0.0920451	0.201782	0.246094	0.313353	0.358532	0.466536	0.521402	0.581941	0.696728	0.778217	0.907762	1.04371	1.24023	1.47656	1.8138	2.36958	2.87478	3.97245	6.39456	12.176	21.8542	28.78	38.8341	51.2849	102.77
0.0922147	0.201784	0.246094	0.314822	0.358806	0.466581	0.522776	0.582998	0.696957	0.778217	0.909175	1.04391	1.25484	1.47656	1.82824	2.39715	2.87799	3.98992	6.41734	12.1771	21.8904	28.8308	38.8346	51.6897	104.989
0.0922966	0.201859	0.246094	0.315274	0.360901	0.46762	0.523154	0.5865	0.69715	0.778217	0.914145	1.04409	1.25484	1.47656	1.8358	2.40668	2.87928	3.99964	6.48234	12.2149	21.9373	28.8758	39.1625	52.0922
0.0924036	0.201949	0.246094	0.315413	0.36216	0.469172	0.52486	0.588876	0.697617	0.778217	0.916873	1.04409	1.25484	1.48828	1.85594	2.41312	2.89613	4.04187	6.52755	12.3047	21.9865	28.8853	39.1958	52.3442
0.0924269	0.202011	0.246094	0.315622	0.362827	0.469462	0.526087	0.589289	0.700231	0.778217	0.917081	1.04409	1.25484	1.49535	1.85598	2.41643	2.91261	4.04329	6.54707	12.3631	22.0304	28.94	39.3519	52.374
0.092703	0.202373	0.246094	0.315737	0.364182	0.469529	0.526841	0.593214	0.700396	0.778488	0.917161	1.04409	1.25484	1.49693	1.85919	2.41875	2.9153	4.0737	6.58129	12.4791	22.0675	29.0137	39.3537	52.3749
0.0927249	0.202948	0.246094	0.316716	0.364746	0.470197	0.527014	0.59371	0.701583	0.780172	0.919061	1.04641	1.25484	1.49693	1.86727	2.42929	2.92051	4.08199	6.60476	12.6688	22.117	29.1026	39.3893	52.8189
0.0928424	0.203164	0.246094	0.317504	0.365932	0.470428	0.527059	0.594658	0.703171	0.780416	0.92409	1.05188	1.25484	1.49693	1.8881	2.43644	2.93523	4.0964	6.62313	12.7636	22.1185	29.2417	39.4016	52.9238
0.0929055	0.203246	0.246094	0.318511	0.367839	0.470904	0.528983	0.596964	0.703231	0.781659	0.924987	1.0543	1.25484	1.49693	1.89205	2.44567	2.93962	4.12903	6.69682	12.9382	22.1857	29.2765	39.416	53.0336
0.0929318	0.203517	0.246094	0.319721	0.368057	0.471567	0.529516	0.598281	0.703625	0.782001	0.926448	1.05552	1.25484	1.49693	1.89404	2.46153	2.95129	4.13072	6.71855	12.9521	22.3287	29.2778	39.4518	53.1839
0.0929977	0.203577	0.246094	0.320141	0.368154	0.472108	0.529791	0.599237	0.703981	0.78623	0.926985	1.05564	1.25484	1.49693	1.90112	2.46758	2.97334	4.16814	6.8642	13.0197	22.3585	29.4852	39.5033	53.4201
0.0930967	0.203826	0.246094	0.320611	0.36935	0.4731	0.531209	0.59992	0.70486	0.786243	0.927377	1.05566	1.25484	1.49785	1.90547	2.48633	2.97656	4.17349	6.89041	13.0724	22.3977	29.7282	39.5559	53.6905
0.0932973	0.204057	0.246094	0.320901	0.369497	0.476517	0.531446	0.600521	0.705492	0.789084	0.92747	1.06406	1.25577	1.49978	1.90676	2.49084	2.98727	4.19705	7.00102	13.406	22.4694	29.8966	39.7696	54.0755
0.0932988	0.204227	0.246094	0.321933	0.369795	0.476614	0.531809	0.601991	0.706564	0.789124	0.930034	1.06717	1.25728	1.50205	1.91693	2.49559	3.00388	4.19965	7.08838	13.5401	22.6784	29.9923	39.7942	54.1765
0.0934076	0.205007	0.246094	0.322152	0.370397	0.476865	0.532318	0.604103	0.709956	0.789415	0.931515	1.06843	1.25763	1.51223	1.92205	2.49762	3.01762	4.22508	7.11203	13.5459	22.6799	30.1533	39.85	54.4083
0.093424	0.205142	0.246094	0.322266	0.37115	0.477085	0.532704	0.606027	0.710465	0.789922	0.931521	1.07816	1.25773	1.51807	1.92205	2.50267	3.06478	4.22653	7.1155	13.6786	22.6802	30.3455	39.9074	54.5726
0.0935156	0.205333	0.246094	0.322742	0.372972	0.478299	0.533865	0.606183	0.711918	0.792969	0.932174	1.07988	1.25869	1.52859	1.9263	2.50967	3.08944	4.22737	7.21125	13.6988	22.7995	30.4241	40.0261	54.5871
0.0935728	0.20537	0.246094	0.323418	0.374654	0.478422	0.533958	0.608001	0.712278	0.793619	0.934365	1.08256	1.26025	1.53528	1.92815	2.52959	3.12587	4.24083	7.2355	13.6988	22.9289	30.611	40.2296	54.9012
0.0936224	0.205492	0.246094	0.323688	0.374713	0.478537	0.534122	0.610671	0.712361	0.795123	0.934605	1.08422	1.2648	1.5416	1.93626	2.5298	3.12861	4.25794	7.24053	13.7182	22.9648	30.8467	40.4208	55.1439
0.0936451	0.20572	0.246094	0.323916	0.374997	0.479462	0.534982	0.611225	0.715391	0.79728	0.936534	1.08867	1.2648	1.54185	1.94118	2.5411	3.14214	4.27362	7.25505	13.9181	23.1397	30.8776	40.5683	55.218
0.0937687	0.205847	0.246094	0.323995	0.376178	0.481785	0.535441	0.611807	0.717201	0.800784	0.937642	1.08955	1.27112	1.54208	1.9419	2.55124	3.1777	4.28195	7.38691	13.9237	23.1664	31.0356	40.6357	55.4247
0.0938296	0.205912	0.246094	0.325159	0.377416	0.481792	0.535703	0.612993	0.718059	0.801047	0.942551	1.09106	1.27417	1.55022	1.94942	2.55281	3.21122	4.31891	7.40329	14.058	23.1987	31.0556	40.6433	55.4823
0.0938625	0.20598	0.246094	0.325196	0.38022	0.482214	0.53682	0.615797	0.721341	0.801216	0.944135	1.10056	1.27536	1.55366	1.94971	2.5586	3.22461	4.32189	7.43705	14.1098	23.2271	31.0876	40.8498	55.6709
0.0939704	0.206039	0.246094	0.325781	0.380222	0.484312	0.537666	0.616204	0.722113	0.801221	0.945183	1.10056	1.27928	1.55643	1.95741	2.5651	3.22461	4.33195	7.44165	14.1179	23.314	31.5202	40.8847	56.4821
0.0941556	0.206561	0.246094	0.326456	0.380571	0.484696	0.53877	0.620982	0.722558	0.802471	0.945357	1.10056	1.28046	1.56827	1.96619	2.566	3.27945	4.34074	7.59283	14.1217	23.4446	31.5336	40.9428	56.7651
0.094375	0.206848	0.246094	0.326534	0.381206	0.485177	0.539252	0.621552	0.723991	0.803468	0.948836	1.10056	1.28888	1.56879	1.96875	2.56929	3.28009	4.35449	7.688	14.2054	23.4462	31.6111	40.9619	56.9299
0.0945469	0.207252	0.246094	0.326671	0.381455	0.486025	0.539735	0.621952	0.725499	0.810524	0.952749	1.10056	1.29047	1.57126	1.96875	2.58359	3.28181	4.40877	7.70768	14.222	23.453	31.8011	41.0769	56.9998
0.0950446	0.207853	0.246094	0.326761	0.3828	0.486159	0.540008	0.62335	0.729064	0.81179	0.953519	1.10056	1.29269	1.57577	1.96875	2.58851	3.28222	4.49063	7.93222	14.4016	23.6455	31.8299	41.6778	57.0642
0.0952503	0.207914	0.246094	0.32697	0.382824	0.486801	0.541036	0.623613	0.733596	0.811814	0.953809	1.10056	1.29609	1.57577	1.97247	2.59624	3.29378	4.50926	7.94137	14.4546	23.6931	31.8989	41.7065	57.1012
0.0953591	0.209504	0.246094	0.327182	0.383373	0.487114	0.541131	0.623735	0.73469	0.817035	0.957042	1.10056	1.29624	1.57577	1.97703	2.6022	3.30456	4.53761	7.99766	14.5279	23.8956	32.0326	41.8374	57.3509
0.0953597	0.209565	0.246094	0.328412	0.38353	0.488977	0.541848	0.624026	0.735012	0.819837	0.957367	1.10056	1.30443	1.57577	1.98234	2.60234	3.31913	4.53774	8.0459	14.7486	23.9117	32.0609	42.0792	57.5517
0.0953851	0.21016	0.246094	0.328443	0.384291	0.489043	0.542629	0.625152	0.735856	0.825171	0.959282	1.10187	1.30726	1.57577	1.98438	2.60433	3.32363	4.56421	8.11201	14.7537	24.1222	32.2601	42.2468	57.5667
0.0956411	0.210241	0.246094	0.328451	0.38536	0.489226	0.543024	0.625627	0.738281	0.82522	0.961638	1.10568	1.30886	1.57577	1.99631	2.60598	3.32438	4.57376	8.12021	14.8004	24.1236	32.3171	42.4707	57.6606
0.0956849	0.210369	0.246094	0.329073	0.385538	0.489522	0.544351	0.626941	0.738281	0.826989	0.962247	1.1093	1.31894	1.57689	1.99942	2.60637	3.3279	4.57376	8.12148	14.8663	24.1373	32.3697	42.4832	57.7843
0.0957507	0.211247	0.246094	0.329103	0.386527	0.490269	0.544402	0.62742	0.738281	0.831211	0.965166	1.1093	1.32526	1.58447	1.99982	2.61584	3.34392	4.57729	8.1225	14.88	24.2737	32.4752	42.4846	57.8992
0.0958554	0.2121	0.246094	0.330511	0.386625	0.490888	0.546425	0.628284	0.738281	0.831783	0.974552	1.1093	1.32526	1.58727	2.01061	2.62264	3.37644	4.58197	8.16726	14.8906	24.324	32.5547	42.7361	57.9224
0.0959816	0.212422	0.246094	0.330904	0.388446	0.491123	0.547385	0.631643	0.738281	0.833111	0.97902	1.11345	1.32526	1.58784	2.01526	2.63411	3.37923	4.59596	8.25686	15.1792	24.3994	32.5577	42.8818	58.1067
0.0959833	0.212721	0.246094	0.331211	0.389446	0.492188	0.548803	0.632341	0.738281	0.833415	0.979836	1.11412	1.32526	1.58827	2.01647	2.64034	3.38462	4.65786	8.37081	15.6088	24.404	32.7051	42.9181	58.2004
0.0962206	0.212903	0.246094	0.331887	0.389547	0.492188	0.549722	0.632349	0.738281	0.834547	0.981437	1.11445	1.32955	1.59134	2.0209	2.64674	3.44105	4.67209	8.38462	15.6924	24.4458	32.9334	43.0783	58.3786
0.0962716	0.212968	0.246094	0.333191	0.390183	0.492188	0.550282	0.634208	0.738281	0.834725	0.981918	1.11456	1.33466	1.5937	2.02174	2.65265	3.45489	4.67233	8.49401	16.0815	24.4514	32.9654	43.2107	58.7144
0.0963237	0.213161	0.246094	0.333356	0.390898	0.492188	0.550282	0.635267	0.738281	0.835023	0.984375	1.11529	1.33577	1.59729	2.02553	2.65788	3.46792	4.67597	8.62496	16.156	24.5008	33.5342	43.2204	58.8629
0.0963371	0.213391	0.246094	0.333417	0.391093	0.492188	0.550282	0.638938	0.738281	0.836383	0.984375	1.11596	1.33688	1.59741	2.02934	2.65906	3.4815	4.72765	8.62703	16.3338	24.7211	33.6843	43.4478	59.3806
0.0964019	0.213406	0.246094	0.334135	0.39198	0.492188	0.550282	0.641524	0.738281	0.840348	0.984375	1.11684	1.33764	1.60142	2.03121	2.67485	3.48603	4.76815	8.63345	16.4672	24.7688	33.7452	43.4837	59.6691
0.0965106	0.213475	0.246311	0.334207	0.392662	0.492188	0.550282	0.642129	0.738281	0.841117	0.984375	1.11885	1.34066	1.6033	2.03583	2.67708	3.49607	4.77828	8.70977	16.5924	24.8299	33.7586	43.5525	59.8842
0.0965448	0.213547	0.246962	0.33433	0.393045	0.492188	0.550282	0.643816	0.738281	0.841166	0.984375	1.12004	1.34244	1.60835	2.03943	2.67771	3.5199	4.81637	8.71279	17.1055	25.0248	33.8405	43.5853	60.205
0.0965999	0.213947	0.247474	0.335013	0.393351	0.492188	0.550282	0.644014	0.738281	0.843042	0.984375	1.12653	1.35134	1.61235	2.04893	2.67846	3.52353	4.82115	8.71749	17.4328	25.1232	33.8646	43.7052	60.5935
0.0967911	0.214066	0.248006	0.335357	0.394039	0.492188	0.550282	0.644894	0.738281	0.84535	0.984375	1.12879	1.35265	1.61577	2.04905	2.68229	3.5263	4.82284	8.77417	17.6565	25.1412	34.0651	43.725	61.2415
0.0968548	0.214711	0.248047	0.338485	0.394367	0.492188	0.550282	0.645115	0.738281	0.845779	0.984375	1.13037	1.35319	1.61841	2.05508	2.68314	3.52792	4.83029	8.8402	17.898	25.1749	34.2062	43.9627	61.4445
0.0969497	0.214757	0.248047	0.338785	0.394784	0.492188	0.550282	0.647096	0.738281	0.847505	0.984375	1.13226	1.35507	1.62326	2.06086	2.68946	3.55022	4.84721	8.87138	17.9729	25.1787	34.2954	44.1212	61.4983
0.097319	0.215063	0.248047	0.338913	0.396245	0.492188	0.550282	0.648808	0.738281	0.847524	0.984375	1.13432	1.35726	1.6236	2.06474	2.68971	3.58115	4.85761	8.88902	17.9745	25.1999	34.3542	44.3283	61.7849
0.0976999	0.215333	0.248047	0.338916	0.396461	0.492188	0.550282	0.649991	0.738281	0.849858	0.984375	1.13438	1.35764	1.62563	2.06978	2.69288	3.58441	4.89225	8.98158	18.104	25.2471	34.4022	44.3455	61.9279
0.0978421	0.215465	0.248047	0.340319	0.396893	0.492188	0.550282	0.651136	0.738281	0.850037	0.984375	1.14532	1.36676	1.63042	2.07133	2.69983	3.5845	4.95645	8.98806	18.1287	25.3051	34.5443	44.5897	62.0003
0.0980289	0.215618	0.248047	0.340542	0.39715	0.492188	0.550282	0.653127	0.738281	0.850226	0.984375	1.1518	1.36841	1.63387	2.0875	2.70374	3.59815	5.02859	9.01512	18.6937	25.3865	34.5636	44.6917	62.0283
0.0982316	0.216558	0.248047	0.342006	0.397754	0.492188	0.550282	0.653771	0.738281	0.853646	0.984375	1.15824	1.37104	1.63958	2.09059	2.70736	3.6065	5.02896	9.03944	18.9565	25.4251	34.6201	44.6957	62.2306
0.0982399	0.216825	0.248047	0.344691	0.398066	0.492188	0.550282	0.654288	0.739779	0.855198	0.984375	1.15997	1.37267	1.65105	2.09696	2.72852	3.61508	5.03906	9.10879	19.0469	25.4252	34.7001	45.0495	62.4985
0.0983089	0.216999	0.248047	0.344919	0.398122	0.492188	0.550282	0.654603	0.740668	0.855565	0.985801	1.16019	1.37399	1.65348	2.11724	2.73211	3.62441	5.06106	9.13091	19.1849	25.4512	34.7376	45.1484	62.5386
0.0985987	0.217065	0.248047	0.345005	0.398571	0.492188	0.550282	0.656892	0.741679	0.855718	0.993792	1.1646	1.37819	1.65445	2.11737	2.76468	3.62671	5.06275	9.23687	19.2346	25.9582	34.935	45.3383	62.5437
0.0986254	0.217199	0.248047	0.345096	0.398796	0.492188	0.550282	0.66064	0.742018	0.855779	0.994235	1.167	1.38089	1.65507	2.12744	2.76594	3.63498	5.16043	9.23753	19.3164	26.0508	35.0161	45.4485	62.6123
0.0986507	0.217846	0.248047	0.345963	0.399315	0.492188	0.550282	0.661012	0.74267	0.858514	0.996188	1.16725	1.38188	1.658	2.13013	2.76635	3.66237	5.16682	9.26414	19.3928	26.0906	35.0841	45.4691	62.7993
0.0986699	0.218047	0.248047	0.346119	0.399693	0.492188	0.550282	0.661146	0.744141	0.862907	0.998877	1.17268	1.38695	1.65988	2.13766	2.77325	3.66337	5.20181	9.28041	19.5708	26.2581	35.1223	45.5927	62.925
0.0986963	0.218049	0.248047	0.346269	0.399789	0.492188	0.550282	0.6628	0.744141	0.866857	0.999588	1.17336	1.38886	1.66314	2.14198	2.78052	3.68748	5.20737	9.42553	19.611	26.4566	35.1578	45.6032	63.0981
0.0988728	0.218499	0.248047	0.346319	0.400332	0.492188	0.550282	0.662921	0.744141	0.870311	1.00005	1.17721	1.39212	1.66395	2.14417	2.7848	3.70173	5.21464	9.43572	19.6708	26.4634	35.2014	45.9117	63.5087
0.0989708	0.218525	0.248047	0.34651	0.400821	0.492188	0.550282	0.665082	0.744569	0.871064	1.00077	1.17755	1.39212	1.6703	2.15363	2.80491	3.7207	5.22044	9.49951	19.8361	26.5775	35.2924	46.1871	63.7784
0.0990075	0.218937	0.248047	0.346639	0.401325	0.492188	0.550282	0.665198	0.745474	0.87117	1.0064	1.17816	1.39358	1.67874	2.16549	2.86936	3.75363	5.22044	9.51425	19.8447	26.5977	35.3976	46.2078	63.9057
0.10014	0.219882	0.248047	0.34709	0.402202	0.492188	0.550282	0.667644	0.745935	0.87427	1.00771	1.1847	1.39369	1.68636	2.16717	2.87373	3.79439	5.28702	9.51682	20.0166	26.692	35.418	46.2499	64.2093
0.100255	0.220045	0.248047	0.347137	0.402576	0.492188	0.550282	0.668204	0.746059	0.874916	1.00944	1.18475	1.39668	1.68991	2.17133	2.88962	3.79439	5.28751	9.57718	20.073	26.8069	35.4409	46.2761	64.3965
0.100478	0.22008	0.248047	0.347465	0.40536	0.492188	0.550282	0.674135	0.749565	0.87726	1.01097	1.18914	1.39716	1.69023	2.17488	2.90132	3.81899	5.3459	9.57974	20.2933	26.8283	35.5501	46.4133	64.6053
0.100633	0.220878	0.248047	0.348029	0.405945	0.492188	0.550282	0.676916	0.753877	0.878252	1.01244	1.19382	1.40267	1.69578	2.17712	2.90331	3.83708	5.34997	9.60257	20.394	26.8927	35.8122	46.4244	64.7121
0.10092	0.22094	0.248427	0.348029	0.406017	0.492188	0.550282	0.678284	0.756853	0.882917	1.01405	1.19856	1.40378	1.69671	2.19117	2.92641	3.83719	5.3549	9.61908	20.3986	26.9066	35.8507	46.4683	64.868
0.100989	0.221015	0.248434	0.348029	0.406361	0.492188	0.550282	0.678918	0.757968	0.884644	1.01467	1.2007	1.40654	1.69686	2.20578	2.95439	3.84662	5.46006	9.79635	20.5363	26.9993	35.9099	46.4978	65.4347
0.101266	0.221569	0.248498	0.348029	0.406402	0.492188	0.550282	0.679514	0.758683	0.886548	1.01467	1.20513	1.40875	1.7106	2.21318	2.97231	3.85072	5.46417	9.96817	20.6694	27.0143	35.9612	46.7478	65.7086
0.101289	0.22157	0.248627	0.348029	0.407997	0.492188	0.550282	0.679559	0.760867	0.887304	1.01467	1.20769	1.409	1.71142	2.21484	2.99151	3.85072	5.472	9.97525	20.7252	27.0446	35.9836	46.7892	65.944
0.101347	0.221786	0.249399	0.348029	0.408119	0.492188	0.550282	0.68031	0.768674	0.887304	1.01467	1.20908	1.42361	1.71766	2.2265	2.99716	3.85072	5.47881	10.0119	20.7919	27.2774	36.4119	46.8572	65.9562
0.101366	0.222057	0.249438	0.348029	0.409981	0.492188	0.550282	0.68187	0.770864	0.887304	1.01467	1.21192	1.42614	1.72266	2.23242	2.99716	3.85119	5.50753	10.029	20.82	27.3084	36.4471	47.0002	65.9584
0.101503	0.223233	0.250062	0.348029	0.410232	0.492188	0.550282	0.682378	0.772451	0.887304	1.01467	1.21608	1.42734	1.72288	2.24453	3.00255	3.88356	5.53692	10.0331	20.8546	27.3124	36.4561	47.0613	66.3814
0.101551	0.223264	0.250749	0.348029	0.410651	0.492188	0.550282	0.6829	0.773827	0.887304	1.01467	1.21891	1.42749	1.72691	2.26507	3.01132	3.92197	5.66094	10.1025	20.8738	27.4297	36.5845	47.0636	66.6323
0.101981	0.223916	0.251502	0.348029	0.410984	0.492188	0.550282	0.683123	0.774054	0.887304	1.01467	1.21918	1.42845	1.73633	2.26802	3.01341	3.92197	5.73413	10.1655	20.9178	27.4655	36.6226	47.1922	66.8419
0.101995	0.224629	0.251723	0.348029	0.41154	0.492188	0.550282	0.684758	0.774482	0.887304	1.01467	1.22429	1.43298	1.74015	2.26972	3.01732	3.92197	5.73831	10.182	20.9226	27.5457	36.7373	47.2996	67.019
0.102399	0.225098	0.252068	0.348029	0.412	0.492188	0.550282	0.687014	0.774523	0.887304	1.01467	1.22481	1.43496	1.74015	2.27127	3.01762	3.92197	5.787	10.1954	20.9439	27.7178	36.7703	47.4723	67.7044
0.102499	0.225388	0.252472	0.348029	0.412302	0.492188	0.550282	0.688835	0.775671	0.887304	1.01467	1.22949	1.43496	1.75081	2.27436	3.01762	3.92941	5.79772	10.2317	20.998	27.7483	36.9893	47.4905	68.2924
0.102672	0.225473	0.252899	0.348029	0.413936	0.493513	0.550282	0.6906	0.778217	0.887304	1.01467	1.23047	1.43496	1.75137	2.27483	3.03778	3.94172	5.82206	10.2762	21.0263	27.8739	37.0655	47.6601	68.4406
0.102773	0.22558	0.253321	0.348029	0.414211	0.493514	0.550282	0.693232	0.778217	0.887304	1.01467	1.23047	1.43496	1.75734	2.27774	3.03924	3.94277	5.84958	10.3389	21.0622	27.9173	37.0955	47.734	68.4923
0.102831	0.225926	0.253522	0.348029	0.414868	0.493581	0.550282	0.693349	0.778217	0.887304	1.01467	1.23047	1.43496	1.76563	2.2798	3.04401	3.95099	5.88638	10.3684	21.0758	27.924	37.1463	47.8775	69.1486
0.102906	0.226244	0.253632	0.348029	0.415085	0.494197	0.550463	0.694197	0.778217	0.888068	1.01467	1.23047	1.43496	1.76928	2.28688	3.04747	3.95413	5.97376	10.3841	21.1477	28.0576	37.2055	47.8859	69.5983
0.103235	0.226315	0.253911	0.348029	0.415303	0.49565	0.551443	0.696058	0.778217	0.889042	1.01467	1.23047	1.43496	1.77397	2.2905	3.05916	3.97772	6.14897	10.3983	21.1747	28.1698	37.2891	48.0687	69.973
0.103248	0.226675	0.254262	0.348029	0.417023	0.495852	0.552895	0.696058	0.778217	0.890209	1.01467	1.23047	1.43776	1.78536	2.29585	3.06688	4.01826	6.19118	10.4381	21.1931	28.3372	37.33	48.1879	70.0597
0.10331	0.226796	0.254535	0.348029	0.418207	0.496094	0.552987	0.696058	0.778217	0.890543	1.01467	1.23047	1.43865	1.78925	2.29921	3.06817	4.02073	6.23209	10.5253	21.1941	28.492	37.4041	48.2189	70.1689
0.103498	0.226905	0.254865	0.348029	0.41866	0.496094	0.553194	0.696058	0.778217	0.892445	1.01467	1.23047	1.43886	1.78964	2.30016	3.09764	4.02605	6.30174	10.5529	21.2364	28.5352	37.4362	48.3715	70.2971
0.103568	0.227238	0.255707	0.348029	0.420612	0.496094	0.554185	0.696058	0.778217	0.892552	1.01467	1.23047	1.4426	1.79159	2.32736	3.10743	4.04255	6.40134	10.6846	21.2495	28.5647	37.5623	48.3887	70.3304
0.10362	0.227245	0.255766	0.348029	0.421887	0.496094	0.55465	0.696058	0.778217	0.893569	1.01467	1.23047	1.44635	1.79225	2.32758	3.12708	4.04307	6.41734	10.7026	21.2496	28.5691	37.5634	48.4105	71.0554
0.103897	0.227526	0.256021	0.348029	0.423458	0.496094	0.55465	0.696058	0.778217	0.896901	1.01467	1.23047	1.45566	1.79795	2.33782	3.14769	4.05044	6.49293	10.8685	21.2613	28.8635	37.6961	48.7089	71.9672
0.104035	0.228186	0.256537	0.348029	0.424812	0.496094	0.55465	0.696058	0.778217	0.897326	1.01516	1.23047	1.4577	1.8061	2.3437	3.16682	4.05405	6.49789	11.0097	21.2949	28.9512	37.744	49.2695	72.2993
0.104373	0.22826	0.256859	0.348029	0.425491	0.496094	0.55465	0.696058	0.778217	0.900465	1.01524	1.23047	1.45881	1.82221	2.38194	3.16684	4.05868	6.61184	11.0849	21.3678	29.235	38.0663	49.3429	73.0353
0.104561	0.229043	0.257045	0.348029	0.425583	0.496094	0.55465	0.696058	0.778217	0.902495	1.0203	1.23047	1.46447	1.82943	2.38303	3.17254	4.06676	6.61577	11.2305	21.3819	29.589	38.0993	49.5088	73.1689
0.104599	0.229399	0.257482	0.348029	0.425832	0.496094	0.55465	0.696058	0.778217	0.908136	1.02221	1.23047	1.46532	1.83206	2.38991	3.18564	4.0917	6.67764	11.2543	21.461	29.6258	38.1702	49.5858	75.0128
0.104642	0.229404	0.257808	0.348029	0.425898	0.496094	0.55465	0.696058	0.778217	0.908328	1.02387	1.23047	1.46548	1.83874	2.39616	3.18913	4.11813	6.67969	11.3049	21.5759	29.7564	38.2323	50.0658	76.0318
0.104693	0.229473	0.257927	0.348029	0.426868	0.496094	0.55465	0.696266	0.778217	0.908869	1.02446	1.23047	1.469	1.83975	2.40287	3.19778	4.11984	6.69398	11.3129	21.5848	29.7677	38.2961	50.1321	77.8955
0.10472	0.229589	0.258566	0.348029	0.426905	0.496094	0.556453	0.696987	0.778217	0.909186	1.02766	1.23047	1.46929	1.84189	2.40355	3.20867	4.12179	6.70186	11.4164	21.6395	29.7928	38.3213	50.1469	81.0639
0.10476	0.229705	0.258795	0.348029	0.427417	0.496094	0.556754	0.697085	0.778217	0.911752	1.03416	1.23047	1.47132	1.84745	2.41345	3.22461	4.12497	6.71616	11.4242	21.7241	30.0891	38.5176	50.1552	83.1666
0.104905	0.230038	0.259613	0.348029	0.429095	0.496094	0.556843	0.698608	0.778217	0.91252	1.03532	1.23329	1.47186	1.85069	2.41444	3.22461	4.13889	6.81113	11.436	21.7472	30.2373	38.7588	50.2374	83.5124
0.1051	0.230295	0.259799	0.348029	0.429372	0.498591	0.558296	0.698941	0.778217	0.913098	1.03735	1.23459	1.47656	1.8593	2.41706	3.22461	4.15802	6.89949	11.4566	21.898	30.2783	38.7625	50.4224	84.1256
0.105402	0.2303	0.26008	0.348029	0.430105	0.498593	0.558345	0.701199	0.778217	0.913635	1.04197	1.23538	1.47656	1.87419	2.419	3.22461	4.16065	6.91416	11.4926	21.9123	30.2802	38.7982	50.4371	85.3402
0.105422	0.230974	0.260271	0.348029	0.430418	0.498933	0.558502	0.701583	0.778217	0.914494	1.04272	1.23764	1.47656	1.89258	2.42612	3.24044	4.18833	6.95965	11.569	21.9141	30.4292	38.8224	50.4381	85.5446
0.105525	0.231136	0.26121	0.348029	0.430433	0.499432	0.559212	0.701583	0.778217	0.915645	1.04409	1.24532	1.48011	1.89384	2.4328	3.25257	4.2168	7.00266	11.5953	21.9763	30.4401	38.894	50.7437	86.0447
0.105596	0.231328	0.261542	0.348029	0.43122	0.500516	0.560508	0.701583	0.778217	0.916558	1.04409	1.24569	1.48828	1.89509	2.43989	3.26024	4.2647	7.05481	11.6526	21.9798	30.4419	38.9069	51.0398	87.2426
0.105698	0.23205	0.261572	0.348029	0.431549	0.501396	0.560715	0.703485	0.778217	0.917063	1.04409	1.24786	1.491	1.90673	2.44334	3.26255	4.31369	7.07608	11.6698	22.0862	30.4573	39.1194	51.2516	89.39
0.105836	0.23205	0.261687	0.348029	0.432337	0.502386	0.561472	0.705031	0.78059	0.917245	1.04409	1.25484	1.49465	1.90698	2.44753	3.26255	4.31767	7.08408	11.7984	22.1171	30.5057	39.1207	51.6918	91.5899
0.105866	0.232635	0.262132	0.348029	0.433313	0.502615	0.561693	0.705303	0.781121	0.919711	1.04409	1.25484	1.49693	1.90865	2.44836	3.26731	4.33195	7.0991	11.8322	22.2965	30.7056	39.1429	51.8655	92.7447
0.105876	0.233138	0.262273	0.348029	0.433449	0.504141	0.563624	0.705796	0.782505	0.920458	1.04409	1.25484	1.49693	1.91179	2.45153	3.27176	4.33445	7.10412	11.857	22.4432	30.976	39.1506	51.8709	93.1868
0.106023	0.233284	0.262315	0.348029	0.433702	0.504428	0.564569	0.70642	0.782723	0.923744	1.04791	1.25484	1.49693	1.91393	2.45285	3.28014	4.36108	7.13316	12.0748	22.5111	31.1537	39.1636	52.0213	94.4837
0.106155	0.233657	0.262657	0.348029	0.434505	0.505209	0.56639	0.706861	0.782769	0.925709	1.05237	1.25484	1.49693	1.92205	2.46493	3.2828	4.3954	7.14621	12.1222	22.5255	31.3126	39.1672	52.1111	95.0104
0.106193	0.233984	0.262715	0.348029	0.435831	0.506926	0.566709	0.707942	0.784393	0.929303	1.05453	1.25484	1.50355	1.92551	2.46834	3.28675	4.39704	7.17717	12.1771	22.8092	31.4496	39.3115	52.1238	95.7249
0.106307	0.234044	0.263683	0.348029	0.436689	0.507129	0.56791	0.707947	0.784393	0.934126	1.05649	1.25484	1.50531	1.93542	2.48561	3.3413	4.42563	7.18735	12.2615	22.9061	31.5412	39.4468	52.1337	97.5206
0.106471	0.234235	0.264425	0.348029	0.438266	0.508435	0.568444	0.708124	0.7848	0.942372	1.07068	1.25484	1.50567	1.94152	2.49284	3.3738	4.42854	7.22926	12.3047	22.9076	31.6634	39.8468	52.1824	97.9564
0.106636	0.235458	0.265903	0.348029	0.439065	0.512675	0.568936	0.708361	0.785014	0.943705	1.0748	1.25484	1.50881	1.9418	2.49337	3.3738	4.45963	7.2313	12.305	22.9103	31.6883	39.849	52.794	99.5099
0.106909	0.235899	0.26615	0.348029	0.439178	0.51348	0.569239	0.708649	0.785977	0.944109	1.08019	1.25484	1.51047	1.94564	2.49666	3.39421	4.51536	7.25261	12.3856	22.9796	31.7738	39.9633	53.0901	99.8064
0.107092	0.236068	0.266327	0.348029	0.442315	0.515105	0.569876	0.709053	0.787629	0.945265	1.08242	1.25484	1.5186	1.95186	2.49956	3.41209	4.53409	7.38691	12.4149	23.0358	31.7839	40.0527	53.0942	102.335
0.107094	0.236318	0.266809	0.348029	0.443584	0.516051	0.570061	0.709315	0.78812	0.948151	1.08361	1.25484	1.52705	1.95409	2.50307	3.41457	4.53774	7.38726	12.5509	23.0541	31.8563	40.0576	53.2671
0.107099	0.236382	0.267151	0.348029	0.443719	0.516442	0.570898	0.712274	0.788142	0.948788	1.0885	1.25484	1.53579	1.96553	2.50327	3.41959	4.54029	7.40329	12.648	23.0584	31.8565	40.2764	53.2752
0.107211	0.237257	0.26749	0.348029	0.444041	0.517063	0.571378	0.713555	0.788248	0.949316	1.10056	1.2564	1.53639	1.96567	2.50781	3.44794	4.5479	7.48917	12.7024	23.1166	31.9673	40.292	53.503
0.107212	0.237267	0.267747	0.348029	0.444844	0.517708	0.57144	0.714074	0.789948	0.950373	1.10056	1.25773	1.53873	1.96875	2.51646	3.45489	4.55098	7.51229	12.9102	23.1988	31.9858	40.3624	53.5603
0.107251	0.237467	0.267938	0.348029	0.445113	0.518151	0.572231	0.715182	0.791369	0.951675	1.10056	1.26405	1.54811	1.97494	2.51816	3.45489	4.56858	7.56887	13.1573	23.3161	32.0073	40.3906	54.1604
0.107334	0.23757	0.268151	0.348029	0.445137	0.518629	0.573098	0.716065	0.791473	0.953851	1.10056	1.26974	1.55857	1.98407	2.51937	3.50435	4.59138	7.57613	13.2942	23.3875	32.1148	40.6931	54.168
0.107359	0.237818	0.268171	0.348029	0.445627	0.520425	0.574496	0.716117	0.792361	0.954644	1.10056	1.27544	1.56395	1.98438	2.52206	3.51375	4.63665	7.5793	13.3862	23.3965	32.1984	40.7758	54.3381
0.107513	0.237856	0.268447	0.348029	0.446	0.520988	0.577938	0.71806	0.793924	0.95472	1.10056	1.27827	1.5735	1.98636	2.52855	3.5195	4.64449	7.66548	13.4196	23.4075	32.2122	40.9826	54.6182
0.107822	0.23822	0.268674	0.348029	0.447898	0.521249	0.578007	0.719171	0.794534	0.956424	1.10056	1.28059	1.57577	1.98638	2.52898	3.53353	4.68014	7.76028	13.4346	23.6145	32.2618	41.0083	54.6273
0.107965	0.238244	0.269418	0.348029	0.447922	0.521946	0.582162	0.720938	0.797446	0.956956	1.10056	1.28184	1.57577	2.00268	2.53265	3.54415	4.69822	7.7739	13.4655	23.7278	32.2974	41.0282	54.6521
0.108058	0.238656	0.269655	0.348029	0.448153	0.522433	0.582688	0.723666	0.800826	0.96117	1.10056	1.28367	1.57577	2.01029	2.53398	3.55026	4.73833	7.78786	13.4903	23.7388	32.3365	41.1039	54.8988
0.10809	0.23869	0.269732	0.348029	0.44893	0.522872	0.583304	0.725208	0.800839	0.967867	1.10056	1.28453	1.58644	2.01218	2.53497	3.57529	4.75441	7.9375	13.591	23.7643	32.6512	41.2313	55.0635
0.108181	0.238916	0.269923	0.348029	0.448979	0.524573	0.583864	0.726547	0.802426	0.968904	1.10056	1.30367	1.58729	2.02532	2.54477	3.59154	4.78522	8.00752	13.6988	23.9075	32.6825	41.2742	55.134
0.108322	0.239039	0.270102	0.348029	0.449045	0.524612	0.584674	0.727994	0.804539	0.970054	1.10056	1.30724	1.58827	2.02533	2.54604	3.59942	4.82422	8.01997	13.7118	23.9509	32.8118	41.3094	55.5782
0.108498	0.239193	0.270247	0.348029	0.449843	0.525865	0.58498	0.728896	0.80463	0.971048	1.10286	1.31143	1.59971	2.02934	2.56835	3.61162	4.84165	8.02309	13.9158	24.2187	32.8182	41.6888	55.6106
0.108689	0.239644	0.270965	0.348029	0.450656	0.526484	0.585115	0.729923	0.80472	0.97196	1.10565	1.31145	1.60585	2.03161	2.57897	3.61166	4.84806	8.04011	13.926	24.3067	32.8759	41.7574	55.7926
0.108735	0.239959	0.271277	0.348029	0.451111	0.526801	0.586234	0.730907	0.807496	0.97224	1.10826	1.31169	1.61322	2.03227	2.60777	3.61483	4.85093	8.07494	13.9459	24.3247	33.0491	41.8347	55.8017
0.108867	0.240001	0.271442	0.348029	0.451612	0.526859	0.588162	0.731703	0.80811	0.97609	1.1109	1.313	1.61479	2.03331	2.61471	3.61904	4.91781	8.10508	14.3141	24.3509	33.0922	41.9669	56.0932
0.108908	0.240085	0.271766	0.348029	0.452564	0.526981	0.588191	0.73506	0.812081	0.976326	1.11522	1.31519	1.62429	2.03869	2.61955	3.62807	4.92096	8.10856	14.3428	24.3844	33.1085	42.0634	56.114
0.109092	0.240086	0.271898	0.348029	0.452628	0.529522	0.591368	0.735067	0.812504	0.984375	1.11727	1.31939	1.62575	2.03985	2.62153	3.63839	4.93854	8.13654	14.3637	24.4087	33.3308	42.1511	56.1538
0.109271	0.241654	0.2723	0.348029	0.454601	0.530971	0.594262	0.738281	0.812814	0.984375	1.11922	1.32367	1.62824	2.04116	2.62662	3.66535	4.94564	8.27772	14.4219	24.4837	33.5158	42.3761	56.2109
0.109285	0.241732	0.272447	0.348029	0.455568	0.531272	0.594424	0.738281	0.81877	0.984375	1.12228	1.32526	1.62991	2.04545	2.64518	3.67275	4.97235	8.28578	14.434	24.495	33.5889	42.4449	56.4194
0.109731	0.24175	0.27269	0.350111	0.45593	0.532136	0.59711	0.738281	0.819822	0.984375	1.12609	1.32526	1.63018	2.04682	2.64528	3.68644	5.07473	8.32169	14.4443	24.5357	33.5897	42.523	56.5242
0.110181	0.242248	0.27299	0.350791	0.456254	0.532936	0.597487	0.738281	0.820429	0.984375	1.1298	1.32526	1.63083	2.05256	2.64708	3.68699	5.08515	8.33621	14.4822	24.5418	33.9032	42.6603	57.1025
0.110192	0.242393	0.273091	0.350791	0.456397	0.533379	0.598555	0.738281	0.824579	0.984375	1.13076	1.32526	1.64437	2.05414	2.65688	3.68748	5.09729	8.34972	14.5438	24.5486	33.929	42.6666	57.3103
0.110232	0.243396	0.273124	0.350791	0.456932	0.53541	0.600027	0.738281	0.828086	0.984375	1.13375	1.32881	1.64966	2.05792	2.68174	3.68748	5.13508	8.35018	14.5656	24.5642	34.0746	42.7599	57.3456
0.110881	0.243528	0.273387	0.350922	0.459306	0.536357	0.603296	0.738281	0.828418	0.984375	1.13654	1.33276	1.65085	2.05906	2.68643	3.70113	5.14193	8.37081	14.5876	24.6129	34.0954	42.7771	57.3466
0.110908	0.24366	0.27355	0.351433	0.459592	0.537903	0.603722	0.738281	0.829274	0.984375	1.13735	1.33419	1.65249	2.08496	2.68672	3.70722	5.18136	8.42067	14.7742	24.6679	34.1052	42.8212	57.4096
0.111126	0.243966	0.273879	0.351454	0.461052	0.53985	0.604827	0.738281	0.829808	0.984375	1.13886	1.34143	1.65926	2.09082	2.6917	3.70788	5.19856	8.47485	14.8625	24.7237	34.2813	42.8694	57.5795
0.111151	0.244133	0.274419	0.351482	0.461392	0.540521	0.606245	0.738281	0.833161	0.984375	1.14139	1.34382	1.65954	2.09342	2.69261	3.72006	5.21654	8.49422	14.9612	24.726	34.3791	43.0185	57.9162
0.111157	0.244309	0.275218	0.351669	0.465008	0.540743	0.606586	0.738281	0.833317	0.984375	1.14308	1.34749	1.66009	2.09642	2.69383	3.7207	5.21902	8.5005	15.1465	24.7998	34.4153	43.1224	57.9845
0.111334	0.244611	0.275547	0.351929	0.46535	0.540786	0.606741	0.738281	0.833544	0.984375	1.14468	1.34798	1.66229	2.10016	2.69417	3.72135	5.30843	8.55846	15.3172	24.8032	34.4231	43.2618	58.1825
0.111377	0.245398	0.275635	0.353765	0.465891	0.541471	0.60754	0.738281	0.836228	0.984375	1.14889	1.35035	1.66283	2.10263	2.70907	3.72165	5.36882	8.68119	15.3526	24.8888	34.4913	43.4443	58.2041
0.111551	0.245705	0.276085	0.354715	0.466624	0.541679	0.607769	0.738281	0.838006	0.984375	1.14954	1.35086	1.66395	2.10495	2.71819	3.74561	5.40286	8.73893	15.5048	25.1362	34.5021	43.4684	58.5941
0.111618	0.245781	0.276313	0.355326	0.467501	0.542158	0.608146	0.738281	0.840646	0.984375	1.1497	1.35173	1.66508	2.10657	2.72852	3.75363	5.40824	8.80644	15.6021	25.1954	34.5584	43.5525	58.6278
0.111644	0.246094	0.276907	0.355337	0.467807	0.54403	0.608913	0.738281	0.843164	0.984375	1.15264	1.35225	1.66746	2.11447	2.73977	3.76435	5.41299	8.88072	15.622	25.2302	34.5672	43.7466	58.8164
0.111785	0.246094	0.27725	0.355353	0.468108	0.549887	0.609699	0.738281	0.843282	0.985809	1.15582	1.35441	1.68069	2.11559	2.76792	3.76646	5.46417	8.89575	15.8284	25.2747	34.5952	43.9155	58.8666
0.111801	0.246094	0.277391	0.355443	0.468313	0.549978	0.609999	0.738281	0.845315	0.988674	1.15824	1.35961	1.68429	2.12784	2.77131	3.78407	5.46417	8.92017	16.6125	25.2941	34.6784	43.9646	59.0684
0.11184	0.246094	0.277518	0.355559	0.469555	0.550282	0.610777	0.738281	0.845638	0.990385	1.15945	1.3606	1.68748	2.14489	2.77282	3.79211	5.48873	8.96854	16.65	25.4573	34.6789	44.0223	59.0835
0.111914	0.246094	0.278336	0.356227	0.469748	0.550282	0.611483	0.738281	0.846025	0.992188	1.15984	1.36289	1.7017	2.14643	2.77715	3.79537	5.50655	8.98789	16.7362	25.5152	34.83	44.0264	59.2314
0.111974	0.246094	0.279486	0.356806	0.469999	0.550282	0.612231	0.738632	0.847595	0.99469	1.161	1.36545	1.70454	2.1539	2.78127	3.79836	5.56372	9.00354	16.7958	25.697	34.9668	44.0972	59.2824
0.112269	0.246094	0.279722	0.35684	0.47014	0.550282	0.612581	0.740013	0.855898	1.01074	1.16261	1.37165	1.71595	2.15873	2.78278	3.80442	5.56847	9.07549	16.9192	25.841	34.9745	44.1152	59.4284
0.112741	0.246094	0.280354	0.357465	0.470243	0.550282	0.614124	0.741053	0.858882	1.01411	1.16332	1.37242	1.72266	2.1605	2.78322	3.8204	5.56894	9.08457	17.0251	25.8964	34.9803	44.2715	59.8329
0.11277	0.246094	0.283648	0.357626	0.470343	0.550282	0.61966	0.741485	0.85919	1.01467	1.16616	1.37278	1.72488	2.17773	2.78514	3.82231	5.58143	9.12348	17.2578	25.9162	35.2106	44.3172	60.101
0.112829	0.246094	0.283747	0.358715	0.47046	0.550282	0.620985	0.743268	0.867683	1.01467	1.16886	1.37439	1.73084	2.18267	2.78641	3.85072	5.60727	9.16349	17.3225	25.9439	35.2272	44.3727	60.482
0.113134	0.246094	0.284391	0.359286	0.470684	0.550282	0.622075	0.744141	0.867893	1.01467	1.17463	1.38315	1.73633	2.18465	2.78655	3.85072	5.63585	9.16382	17.4457	25.963	35.3297	44.3914	60.5741
0.113173	0.246094	0.284527	0.361233	0.470821	0.550282	0.622506	0.744141	0.870174	1.01467	1.17615	1.38355	1.74015	2.18507	2.79893	3.86339	5.64418	9.17262	17.7254	26.2852	35.3636	44.5601	60.6742
0.11321	0.246094	0.286019	0.361306	0.470998	0.550282	0.623467	0.744141	0.870764	1.01467	1.17681	1.38471	1.74456	2.20703	2.80273	3.86749	5.67875	9.24705	17.804	26.3301	35.5522	44.7234	61.1082
0.113613	0.246094	0.286397	0.361321	0.472103	0.550282	0.624754	0.744141	0.871201	1.01467	1.17881	1.39212	1.74757	2.20942	2.8059	3.88644	5.71047	9.2735	17.9552	26.4131	35.5714	44.8007	61.1886
0.113653	0.246094	0.286528	0.362112	0.474839	0.550282	0.625544	0.744141	0.871619	1.01467	1.18345	1.39212	1.75266	2.21095	2.8059	3.89692	5.74796	9.3548	17.97	26.4169	35.6057	44.8169	61.5132
0.114568	0.246094	0.287354	0.362303	0.475309	0.550282	0.627948	0.745451	0.872598	1.01467	1.18497	1.39212	1.75396	2.21484	2.81967	3.92197	5.75381	9.36193	18.1054	26.5011	35.6162	44.9506	61.5941
0.114618	0.246094	0.287572	0.362644	0.476329	0.550282	0.62914	0.746229	0.8736	1.01467	1.18611	1.39267	1.75673	2.21662	2.82817	3.92197	5.76419	9.37149	18.1276	26.5565	35.7753	45.3926	62.2103
0.115106	0.246094	0.287674	0.363113	0.476618	0.550282	0.62928	0.747539	0.874195	1.01467	1.18624	1.39324	1.76238	2.23719	2.82817	3.92197	5.7993	9.38129	18.2558	26.653	35.8436	45.5129	62.4844
0.115218	0.246094	0.287814	0.363159	0.47817	0.550282	0.633621	0.749415	0.874272	1.01467	1.18819	1.39725	1.77461	2.24618	2.83935	3.92197	5.9775	9.47545	18.2633	26.7917	35.8597	45.7033	62.4989
0.115332	0.246094	0.288008	0.363735	0.478605	0.550282	0.635319	0.75004	0.87535	1.01467	1.18851	1.40317	1.7767	2.24905	2.86045	3.94659	5.98434	9.49048	18.2707	26.9493	35.8915	45.7651	62.5209
0.115422	0.246094	0.288258	0.364628	0.478907	0.550282	0.635882	0.750724	0.876546	1.01467	1.19358	1.40402	1.78863	2.25118	2.87258	3.95163	5.99945	9.49935	18.3326	27.0885	35.9359	45.7941	62.5649
0.115465	0.246094	0.289637	0.365337	0.479244	0.550282	0.636097	0.75258	0.88105	1.01467	1.19421	1.40818	1.79159	2.25135	2.87392	3.98121	6.06224	9.51855	18.3726	27.1098	36.0065	45.8481	62.6165
0.115556	0.246094	0.289826	0.36557	0.479343	0.550282	0.63663	0.753315	0.884193	1.01467	1.19787	1.4083	1.8038	2.2567	2.87707	3.99884	6.09841	9.64154	18.6478	27.1117	36.0088	46.0824	62.8284
0.115736	0.246094	0.290323	0.365908	0.479759	0.550282	0.637737	0.753991	0.886888	1.01467	1.20231	1.41498	1.80423	2.25903	2.88054	4.00732	6.19412	9.6611	18.6509	27.2253	36.1747	46.2892	62.8344
0.115756	0.246094	0.290445	0.366076	0.479997	0.550282	0.637872	0.755331	0.887304	1.01495	1.20883	1.416	1.8047	2.26572	2.89037	4.02445	6.20117	9.81694	18.7419	27.307	36.2051	46.3229	62.8784
0.115806	0.246094	0.290887	0.366769	0.48007	0.550282	0.638241	0.755538	0.887304	1.01667	1.2092	1.42785	1.81406	2.26621	2.89082	4.03468	6.23525	9.82129	18.8338	27.3778	36.2536	46.57	63.1115
0.11584	0.246094	0.290957	0.36708	0.480351	0.550282	0.639894	0.756343	0.887304	1.01805	1.21006	1.42889	1.81412	2.26896	2.89651	4.03791	6.26164	9.84545	18.9878	27.4102	36.2784	46.7185	63.1398
0.115966	0.246094	0.291206	0.367117	0.480829	0.550282	0.640842	0.757612	0.887304	1.02307	1.2174	1.43468	1.82038	2.26901	2.90331	4.04662	6.28683	9.85558	19.0916	27.4844	36.3334	46.7731	63.2291
0.116072	0.246094	0.291738	0.367443	0.483084	0.550282	0.643696	0.759547	0.887304	1.02398	1.23009	1.43496	1.82269	2.26997	2.90619	4.06132	6.32961	10.008	19.2835	27.4961	36.3784	46.9685	63.4607
0.11661	0.246094	0.291815	0.368948	0.484152	0.550282	0.646128	0.761818	0.887304	1.02758	1.23047	1.43496	1.82471	2.27139	2.92699	4.07611	6.3561	10.1494	19.4159	27.6384	36.4506	47.0471	63.7781
0.116848	0.246094	0.291837	0.369281	0.484433	0.550282	0.647365	0.762242	0.887304	1.03059	1.23047	1.43496	1.83801	2.28576	2.93053	4.08805	6.40487	10.16	19.4667	27.7658	36.4665	47.1332	64.1756
0.11687	0.246094	0.292028	0.371016	0.484991	0.550282	0.648135	0.766922	0.887304	1.03338	1.23047	1.43496	1.8432	2.28663	2.95746	4.09933	6.41734	10.182	19.5255	27.7797	36.7946	47.2198	64.8013
0.117148	0.246094	0.292101	0.371879	0.486258	0.550282	0.648948	0.771689	0.887304	1.03532	1.23047	1.44613	1.84689	2.28701	2.95858	4.10591	6.44922	10.2232	19.578	27.7904	36.9128	47.2632	64.9911
0.117184	0.246094	0.292132	0.372028	0.486673	0.550282	0.649811	0.7738	0.887304	1.03552	1.23047	1.45172	1.86333	2.29357	2.96721	4.13744	6.46852	10.2714	19.6151	27.9293	37.1305	47.4919	65.1914
0.117398	0.246094	0.293372	0.372412	0.487262	0.550282	0.650107	0.774155	0.887304	1.03661	1.23047	1.4529	1.86744	2.29522	2.99482	4.14082	6.48185	10.2733	19.6664	28.0117	37.1922	47.553	65.9704
0.11744	0.246094	0.293613	0.374924	0.487449	0.550282	0.650882	0.774576	0.888713	1.03663	1.23047	1.45788	1.86971	2.30015	2.99716	4.15802	6.48562	10.3389	19.6748	28.083	37.2881	47.7289	66.5559
0.117738	0.246094	0.293808	0.375398	0.487977	0.550282	0.65184	0.777592	0.890643	1.03735	1.23047	1.46477	1.87419	2.30826	3.01762	4.17337	6.48906	10.3664	19.6937	28.0838	37.4354	47.7719	66.7735
0.117863	0.246094	0.293873	0.375543	0.488052	0.550282	0.652616	0.778217	0.896932	1.03892	1.23047	1.47157	1.87458	2.31036	3.04476	4.18798	6.54308	10.4262	19.7075	28.364	37.5047	47.7804	67.0429
0.117899	0.246094	0.293989	0.376304	0.488994	0.550282	0.655141	0.778217	0.903878	1.04119	1.23047	1.47538	1.87482	2.31672	3.04507	4.19176	6.54469	10.4755	19.7477	28.5924	37.5557	47.907	67.083
0.118078	0.246094	0.294221	0.377706	0.489544	0.550282	0.655544	0.778217	0.911475	1.04152	1.23047	1.47656	1.87565	2.32129	3.04587	4.1981	6.55498	10.4755	19.8707	28.6789	37.5588	48.0799	67.1786
0.118178	0.246094	0.295464	0.377807	0.491031	0.550282	0.656283	0.778217	0.912589	1.04346	1.23047	1.47656	1.87677	2.32339	3.04904	4.21223	6.5712	10.6052	19.8907	28.7685	37.5849	48.2418	67.2074
0.118197	0.246094	0.295731	0.378495	0.492188	0.550282	0.658217	0.778217	0.9146	1.04409	1.23047	1.47656	1.87686	2.32727	3.06817	4.21587	6.58162	10.6398	19.8929	28.8116	37.6935	48.2673	67.25
0.118322	0.246094	0.295983	0.378612	0.492188	0.550282	0.658531	0.778217	0.920458	1.04409	1.23047	1.47656	1.88134	2.33532	3.09653	4.25902	6.59956	10.6627	20.034	28.8167	37.8537	48.2998	67.3638
0.118678	0.246094	0.296222	0.379124	0.492188	0.550282	0.659633	0.778217	0.924315	1.04409	1.23047	1.48828	1.89098	2.34007	3.11087	4.28729	6.62158	10.7827	20.0875	28.8544	37.9863	48.6079	67.9228
0.118815	0.246094	0.296855	0.37916	0.492188	0.550282	0.662152	0.778217	0.925666	1.04409	1.23131	1.49525	1.89674	2.34309	3.12269	4.29505	6.65873	10.7836	20.1857	29.1775	37.9983	48.6245	67.9667
0.119017	0.246094	0.297178	0.379861	0.492188	0.550282	0.662957	0.778217	0.92652	1.04409	1.232	1.49551	1.90015	2.34669	3.1476	4.2974	6.66825	10.8379	20.1975	29.3548	38.0681	49.0261	68.03
0.119232	0.246094	0.29739	0.380704	0.492188	0.550282	0.663264	0.778217	0.927511	1.04409	1.23313	1.49693	1.90454	2.35707	3.14952	4.30287	6.71849	10.9895	20.2037	29.3688	38.1638	49.0638	68.2924
0.119257	0.246094	0.2974	0.382638	0.492188	0.550282	0.663497	0.778217	0.93456	1.04409	1.23786	1.49693	1.90753	2.36179	3.15653	4.31213	6.80169	11.0762	20.4055	29.4174	38.2097	49.2632	68.2961
0.119292	0.246094	0.297528	0.382771	0.492188	0.550282	0.663879	0.778217	0.934733	1.04409	1.23939	1.49693	1.91425	2.3671	3.16225	4.38583	6.83337	11.1371	20.4583	29.4337	38.2807	49.362	69.4265
0.119308	0.246094	0.297585	0.384087	0.492188	0.550282	0.66571	0.778217	0.935524	1.04409	1.24023	1.5003	1.91745	2.36782	3.16981	4.39624	6.86561	11.1483	20.4877	29.4377	38.2861	49.4118	69.4373
0.119509	0.246094	0.298506	0.384393	0.492188	0.550282	0.666765	0.778217	0.936172	1.04645	1.24081	1.50772	1.92186	2.3742	3.18429	4.41509	6.89443	11.2085	20.5987	29.5312	38.3824	49.4292	69.7571
0.119568	0.246094	0.298568	0.386107	0.492188	0.550282	0.666867	0.778217	0.936445	1.05442	1.24447	1.50881	1.92205	2.38356	3.20113	4.4183	6.90631	11.2187	20.6165	29.673	38.4016	49.4665	71.8701
0.119594	0.246094	0.299181	0.386641	0.492188	0.550282	0.667793	0.778217	0.938548	1.05971	1.24894	1.50928	1.92205	2.40282	3.20179	4.43889	6.91488	11.2238	20.6181	29.7377	38.4675	49.5484	71.875
0.119706	0.246094	0.299387	0.387592	0.492188	0.550282	0.66793	0.778217	0.941771	1.06012	1.24922	1.51002	1.92395	2.40503	3.20237	4.43966	6.92799	11.3228	20.6883	29.8376	38.4871	49.7196	72.6511
0.119708	0.246094	0.299428	0.388012	0.492188	0.550282	0.668885	0.778217	0.948747	1.06492	1.25209	1.51079	1.9258	2.41792	3.21058	4.46755	6.94531	11.3319	20.6912	29.9234	38.5139	49.9191	75.0298
0.119773	0.246094	0.299964	0.388325	0.492188	0.550282	0.669143	0.778217	0.954895	1.06667	1.25484	1.51494	1.92693	2.4247	3.22461	4.47173	6.96058	11.3492	20.7105	29.9539	38.6366	50.0747	76.533
0.120142	0.246094	0.300692	0.389457	0.492188	0.550282	0.669994	0.778217	0.95795	1.06706	1.25484	1.52655	1.93384	2.43446	3.22461	4.47173	6.99609	11.4342	20.7166	29.9639	38.7258	50.0748	76.9483
0.120183	0.246094	0.300936	0.389797	0.492188	0.550282	0.671701	0.778217	0.958612	1.07029	1.25484	1.52706	1.93402	2.43575	3.22461	4.478	7.00634	11.4715	20.7241	30.0489	38.76	50.1017	78.4733
0.120284	0.246094	0.301839	0.390069	0.492188	0.550282	0.671867	0.778217	0.963498	1.07201	1.25484	1.52727	1.93731	2.44101	3.22461	4.49386	7.06374	11.4946	20.9227	30.0943	38.8183	50.134	79.367
0.120459	0.246094	0.301841	0.390132	0.492188	0.550282	0.672214	0.778217	0.966203	1.07371	1.25484	1.5279	1.94189	2.44298	3.22851	4.51333	7.06897	11.5097	21.0175	30.1181	38.8378	50.2263	81.7157
0.120826	0.246094	0.302173	0.390588	0.492188	0.551589	0.672605	0.778217	0.966456	1.07692	1.25484	1.53875	1.94234	2.4435	3.24807	4.52321	7.08516	11.569	21.0325	30.1205	39.0263	50.3242	81.8832
0.120856	0.246094	0.302374	0.391267	0.492188	0.552739	0.673446	0.778217	0.968363	1.07906	1.25484	1.54134	1.94329	2.44645	3.26115	4.53774	7.12231	11.7006	21.1333	30.1251	39.046	50.5845	82.9547
0.12087	0.246094	0.30276	0.391899	0.492188	0.552798	0.67378	0.778217	0.968767	1.07949	1.25484	1.54983	1.94545	2.45131	3.27242	4.55642	7.17044	11.8787	21.1931	30.1549	39.1495	50.7927	84.0348
0.121135	0.246094	0.302867	0.391946	0.492188	0.553388	0.674182	0.778217	0.969219	1.08374	1.25484	1.55552	1.94752	2.45315	3.30936	4.57047	7.18735	11.879	21.2175	30.2871	39.1891	50.822	84.9616
0.121299	0.246094	0.303356	0.393191	0.492188	0.553413	0.675776	0.778217	0.969995	1.08567	1.25484	1.57037	1.95461	2.4594	3.31343	4.57376	7.20646	12.0007	21.2207	30.2959	39.203	50.9004	85.0004
0.121374	0.246094	0.303486	0.394195	0.492188	0.55465	0.679268	0.778217	0.970625	1.08847	1.25484	1.57577	1.95577	2.48047	3.31647	4.58675	7.21045	12.0096	21.2361	30.3859	39.2229	51.5034	85.2868
0.121454	0.246094	0.304002	0.394419	0.492188	0.55465	0.681683	0.778217	0.970677	1.09181	1.25484	1.57577	1.95841	2.48047	3.3179	4.65241	7.26441	12.0586	21.3057	30.5132	39.2559	51.7589	87.2384
0.121527	0.246094	0.304109	0.395675	0.492188	0.55465	0.682201	0.778217	0.970744	1.09838	1.25484	1.58225	1.96759	2.49096	3.32308	4.68154	7.28787	12.0955	21.3072	30.6828	39.5752	51.8181	88.4846
0.121558	0.246094	0.304238	0.395835	0.492188	0.55465	0.682699	0.778217	0.976143	1.10056	1.25484	1.5867	1.96875	2.49809	3.32493	4.73731	7.30453	12.1432	21.3502	30.8011	39.7606	51.8482	89.1882
0.122087	0.246094	0.304563	0.396462	0.492188	0.55465	0.68316	0.778217	0.978506	1.10056	1.25484	1.58827	1.96923	2.50045	3.3279	4.74052	7.30929	12.3025	21.3517	30.923	39.9056	51.9651	89.9518
0.122154	0.246094	0.304875	0.396794	0.492188	0.55465	0.684607	0.778217	0.983889	1.10056	1.25484	1.58859	1.97594	2.50846	3.33318	4.76064	7.38691	12.3052	21.4427	31.0012	40.0288	52.0942	90.8058
0.12246	0.246094	0.305163	0.396925	0.492188	0.554651	0.684966	0.778217	0.984375	1.10056	1.25508	1.59538	1.98089	2.51289	3.33731	4.82233	7.40711	12.359	21.4793	31.0299	40.2081	52.2334	91.9264
0.12308	0.246094	0.305164	0.397289	0.492188	0.554821	0.687314	0.778217	0.984375	1.10056	1.26202	1.59737	1.98407	2.52125	3.34186	4.85667	7.41579	12.3647	21.582	31.0868	40.2151	52.2843	91.9433
0.12318	0.246094	0.305508	0.397544	0.492188	0.55493	0.688077	0.778217	0.984375	1.10056	1.26214	1.60171	1.98438	2.52214	3.36339	4.92195	7.45723	12.4078	21.8884	31.2169	40.233	52.4837	93.4614
0.123605	0.246094	0.305886	0.397754	0.492188	0.555116	0.688146	0.778217	0.984375	1.10056	1.26473	1.60382	1.98438	2.52288	3.3738	4.93244	7.47208	12.4246	22.0448	31.2325	40.3981	52.8799	93.6069
0.123662	0.246094	0.307315	0.39862	0.492188	0.555475	0.68841	0.778217	0.984375	1.10056	1.27313	1.62125	1.98662	2.52935	3.3738	4.94876	7.58082	12.5343	22.0511	31.2617	40.4159	52.8924	94.6255
0.123791	0.246094	0.30789	0.400165	0.492188	0.555623	0.688725	0.778217	0.984375	1.10056	1.27384	1.62125	1.98751	2.52959	3.3738	4.95211	7.58878	12.5399	22.1575	31.5547	40.4583	52.9213	95.3097
0.124011	0.246094	0.308157	0.401212	0.492188	0.557238	0.692575	0.778217	0.984375	1.10056	1.27512	1.62186	1.99156	2.53251	3.38263	4.97694	7.60346	12.5943	22.1607	31.5802	40.5548	53.1876	95.832
0.12413	0.246094	0.308208	0.401227	0.492188	0.557586	0.695576	0.779713	0.984375	1.10056	1.2781	1.62708	1.99449	2.53266	3.3831	5.0054	7.60885	12.6923	22.2041	31.6611	40.6294	53.4703	97.1641
0.124203	0.246094	0.309181	0.401245	0.492188	0.558895	0.696058	0.783351	0.984375	1.10056	1.28905	1.62938	1.99702	2.53794	3.38358	5.05695	7.62805	12.6928	22.2298	31.7156	40.6869	53.6085	99.1443
0.124486	0.246094	0.309405	0.401257	0.492188	0.559984	0.696058	0.784376	0.984375	1.10056	1.28928	1.6338	2.0113	2.54348	3.39488	5.06928	7.6497	12.7569	22.2535	31.793	40.7379	53.6688
0.124601	0.246094	0.309723	0.401322	0.492188	0.56163	0.696058	0.784393	0.984375	1.1025	1.28999	1.63787	2.01282	2.54953	3.40374	5.07108	7.72275	12.7807	22.272	31.7946	40.9942	53.7194
0.124646	0.246094	0.31009	0.402422	0.492188	0.562308	0.696058	0.784393	0.984375	1.10385	1.29624	1.64237	2.01614	2.55248	3.40395	5.10801	7.78488	12.7861	22.2775	31.9061	41.1343	53.8998
0.124736	0.246094	0.31028	0.402712	0.492188	0.562765	0.696058	0.784393	0.984375	1.1093	1.31026	1.64472	2.01821	2.5525	3.40554	5.11362	7.88283	12.8671	22.3512	31.9178	41.1863	53.9449
0.124786	0.246094	0.310475	0.403002	0.492188	0.562846	0.696058	0.784393	0.984375	1.1098	1.3113	1.65085	2.01853	2.55551	3.41339	5.12508	7.89578	12.8959	22.4225	31.9746	41.2161	54.1335
0.124821	0.246094	0.310515	0.403575	0.493335	0.562882	0.696058	0.787035	0.984375	1.11002	1.31155	1.65085	2.01857	2.55603	3.4148	5.22772	7.9375	12.9075	22.4545	32.0346	41.2632	54.2536
0.124976	0.246094	0.310721	0.404247	0.495048	0.562964	0.696058	0.787767	0.984375	1.11456	1.31443	1.65085	2.02272	2.56215	3.42502	5.26187	7.94391	12.9238	22.5105	32.0455	41.4343	54.2605
0.124976	0.246094	0.311107	0.404893	0.495058	0.563828	0.696058	0.788249	0.985417	1.11619	1.31565	1.65085	2.03342	2.56471	3.44481	5.28386	8.03703	12.9508	22.575	32.0537	41.5129	54.6134
0.125216	0.246094	0.311114	0.405149	0.496094	0.56405	0.696058	0.793612	0.987363	1.11626	1.32072	1.65111	2.03471	2.56664	3.45464	5.32903	8.05805	12.9704	22.5949	32.056	41.5263	54.6452
0.125299	0.246094	0.311437	0.405544	0.496094	0.564939	0.696058	0.798064	0.990781	1.11977	1.32427	1.65463	2.04275	2.57801	3.45489	5.33382	8.08551	13.0233	22.6106	32.0826	41.6398	54.7532
0.125384	0.246094	0.311818	0.406271	0.496094	0.56547	0.696462	0.800429	0.994741	1.12111	1.32526	1.65574	2.04412	2.57864	3.45489	5.34893	8.13528	13.1841	22.653	32.2575	41.6491	54.9611
0.125422	0.246094	0.312115	0.406851	0.496094	0.566206	0.69657	0.803744	0.995124	1.1239	1.32526	1.66095	2.04498	2.58265	3.45489	5.36892	8.16798	13.2367	22.6894	32.2618	41.7021	55.0623
0.125626	0.246094	0.31213	0.408842	0.496094	0.56697	0.698784	0.803827	0.995321	1.1245	1.32526	1.66508	2.04914	2.60203	3.46163	5.38203	8.27174	13.4152	22.7934	32.2947	41.7392	55.1933
0.125682	0.246094	0.312314	0.409935	0.496094	0.567119	0.701267	0.804437	0.996232	1.12519	1.32526	1.66864	2.04992	2.60308	3.46348	5.40635	8.28862	13.4197	22.9279	32.3919	42.0455	55.2707
0.126474	0.246094	0.312844	0.410213	0.496094	0.568779	0.701526	0.805025	0.996887	1.12672	1.32526	1.67925	2.05215	2.6035	3.47348	5.46417	8.29627	13.4417	23.0561	32.4024	42.1323	55.4629
0.126647	0.246094	0.31316	0.410315	0.496094	0.572388	0.701583	0.80895	0.998675	1.12889	1.32526	1.68216	2.05227	2.61219	3.47708	5.4906	8.33452	13.5352	23.1082	32.4171	42.1528	55.7032
0.126692	0.246094	0.314034	0.410899	0.496094	0.573098	0.701583	0.809806	0.999203	1.13112	1.32526	1.68949	2.05594	2.61266	3.48016	5.49172	8.39881	13.5963	23.1462	32.4276	42.1635	55.8839
0.126738	0.246094	0.3149	0.411102	0.496094	0.57312	0.701583	0.81114	1.00027	1.13184	1.32526	1.69906	2.05839	2.62102	3.50791	5.49526	8.51063	13.6988	23.1777	32.4737	42.3311	55.9355
0.126777	0.246094	0.314959	0.411355	0.496094	0.573353	0.702016	0.81268	1.00155	1.13681	1.32526	1.70106	2.0586	2.62629	3.51627	5.49799	8.52428	13.7284	23.2009	32.5328	42.4211	56.0137
0.1272	0.246094	0.315341	0.411446	0.496094	0.576429	0.702167	0.813805	1.00532	1.13937	1.32526	1.70839	2.06017	2.64964	3.52469	5.50124	8.53022	13.9081	23.2407	32.8441	42.4574	56.1464
0.127252	0.246094	0.315446	0.411886	0.496491	0.576476	0.702823	0.813881	1.00699	1.14212	1.32864	1.71135	2.06661	2.65512	3.52994	5.53581	8.56547	13.9459	23.2677	32.8753	42.5243	56.2541
0.12772	0.246094	0.315717	0.413196	0.496904	0.579139	0.703941	0.815467	1.00756	1.14354	1.32907	1.71451	2.07116	2.66175	3.54301	5.56684	8.6168	14.0181	23.3374	33.1024	42.5276	56.2883
0.127848	0.246094	0.315947	0.413761	0.497592	0.580808	0.704824	0.818182	1.00918	1.14539	1.3315	1.7164	2.07895	2.6865	3.56737	5.58948	8.63454	14.1734	23.3527	33.1688	42.5659	56.5746
0.127971	0.246094	0.316419	0.413957	0.497951	0.583205	0.70512	0.818773	1.00976	1.14614	1.33359	1.72002	2.08429	2.69036	3.5705	5.60572	8.75924	14.3815	23.4106	33.3005	42.9139	56.6968
0.127983	0.246094	0.317463	0.41426	0.50068	0.584504	0.706506	0.820209	1.01004	1.14619	1.33462	1.72431	2.08846	2.6913	3.5707	5.6106	8.76091	14.4287	23.4189	33.4013	43.137	56.7129
0.128171	0.246094	0.317645	0.414717	0.50095	0.586601	0.709723	0.823216	1.01094	1.14747	1.33552	1.73048	2.09397	2.71297	3.57697	5.61892	8.78386	14.4662	23.4331	33.5447	43.1888	57.0433
0.128323	0.246094	0.317653	0.414924	0.502046	0.588128	0.713639	0.82439	1.01172	1.15028	1.336	1.73633	2.09882	2.71724	3.60893	5.64411	8.79694	14.4864	23.4652	33.5458	43.2837	57.1274
0.128403	0.246094	0.317697	0.415113	0.502198	0.589088	0.713702	0.825326	1.01285	1.15301	1.33662	1.74015	2.0992	2.71762	3.60954	5.64863	8.86483	14.5166	23.484	33.6514	43.3264	57.1319
0.128786	0.246094	0.318081	0.415312	0.502582	0.589708	0.714892	0.827446	1.01343	1.15748	1.3467	1.74015	2.10263	2.71811	3.60966	5.67914	8.92241	14.8993	23.5425	33.71	43.4126	57.1326
0.12909	0.246094	0.318213	0.416073	0.502699	0.590681	0.71514	0.827752	1.01346	1.15888	1.34977	1.74015	2.10263	2.72437	3.61162	5.70696	8.93001	15.2156	23.59	33.727	43.4162	57.2499
0.129105	0.246094	0.318834	0.416229	0.503145	0.592156	0.716597	0.828126	1.01467	1.15951	1.35555	1.74631	2.10911	2.72697	3.61162	5.72661	8.96131	15.2567	23.7745	33.7866	43.4272	57.3875
0.129153	0.246094	0.321333	0.416426	0.504554	0.59226	0.716817	0.828715	1.01467	1.16279	1.36094	1.74808	2.11296	2.72908	3.61162	5.73176	8.99432	15.2715	23.8622	33.8163	43.6656	57.691
0.129231	0.246094	0.321399	0.416664	0.507631	0.592492	0.716861	0.829718	1.01467	1.16578	1.36746	1.75051	2.12345	2.73977	3.61162	5.7417	9.03382	15.2897	23.8671	33.8163	44.1183	57.7192
0.129449	0.246094	0.321461	0.417359	0.507723	0.592528	0.719356	0.831642	1.01467	1.16662	1.36881	1.75396	2.12419	2.74271	3.61987	5.76163	9.04029	15.344	23.8749	33.8806	44.13	58.0567
0.129697	0.246094	0.32149	0.418107	0.508242	0.593632	0.720938	0.831646	1.01467	1.16816	1.3714	1.75396	2.13288	2.74549	3.62931	5.77856	9.09787	15.5942	23.8805	34.0451	44.3	58.2799
0.129856	0.246094	0.321838	0.419178	0.513553	0.594626	0.722524	0.832505	1.01467	1.17063	1.37416	1.76244	2.1336	2.75125	3.63353	5.78663	9.10204	15.6613	23.9424	34.2457	44.3102	58.3374
0.129871	0.246094	0.322353	0.419318	0.516134	0.594864	0.722672	0.834915	1.01467	1.18272	1.38689	1.76416	2.13378	2.75816	3.63557	5.79539	9.15574	15.7532	24.0295	34.2482	44.5496	58.527
0.130457	0.246094	0.322529	0.419765	0.516403	0.595725	0.72437	0.835735	1.01467	1.18568	1.38714	1.76764	2.1356	2.76296	3.65064	5.85607	9.2259	15.7811	24.046	34.2986	44.6493	58.6704
0.130689	0.246094	0.323986	0.419869	0.51921	0.595831	0.725718	0.838854	1.01467	1.18655	1.38915	1.7684	2.13642	2.76719	3.65676	5.86045	9.22892	15.7827	24.0895	34.3053	44.6608	58.8804
0.130713	0.246094	0.326312	0.42024	0.523723	0.59674	0.725901	0.840153	1.01467	1.18997	1.39212	1.76845	2.13887	2.77325	3.67105	5.87005	9.27872	15.8284	24.1373	34.3192	44.7841	59.3003
0.130791	0.246094	0.32687	0.420384	0.524083	0.596908	0.727169	0.842278	1.01467	1.19053	1.39988	1.7733	2.1417	2.77325	3.68748	5.87914	9.33478	16.0064	24.1866	34.4153	44.8784	59.318
0.130827	0.246094	0.327089	0.421306	0.524714	0.597455	0.728947	0.842647	1.01467	1.19287	1.40235	1.77345	2.14373	2.78589	3.68748	5.91937	9.33558	16.0065	24.2959	34.4261	44.954	59.4629
0.1312	0.246094	0.327243	0.422901	0.525437	0.598285	0.729383	0.844217	1.01467	1.19411	1.41134	1.77461	2.14414	2.78866	3.68748	5.92489	9.33724	16.0489	24.3247	34.458	44.9911	59.6082
0.131258	0.246094	0.327304	0.423171	0.526842	0.598825	0.734751	0.845377	1.01467	1.19467	1.41514	1.77461	2.14547	2.79632	3.71997	5.92812	9.34516	16.1768	24.3575	34.461	45.2525	59.8811
0.131515	0.246094	0.32742	0.423416	0.527259	0.600168	0.735228	0.845532	1.01467	1.19729	1.43303	1.77464	2.16151	2.80395	3.7207	5.97289	9.3548	16.2515	24.3732	34.4619	45.2589	60.0453
0.13156	0.246094	0.327687	0.424186	0.530133	0.601471	0.736429	0.851338	1.01467	1.20007	1.43496	1.77593	2.16753	2.8059	3.75363	5.99945	9.38154	16.5225	24.3745	34.5606	45.2967	60.0607
0.131732	0.246094	0.327915	0.424459	0.531076	0.602506	0.738234	0.854045	1.01467	1.20135	1.43496	1.77686	2.17081	2.82817	3.75646	6.02045	9.49935	16.7513	24.3905	34.5812	45.5975	60.2743
0.131992	0.246094	0.328173	0.42508	0.531103	0.604526	0.738281	0.856232	1.01467	1.20267	1.43496	1.78528	2.1714	2.83054	3.75871	6.03307	9.50797	16.9519	24.3983	34.6577	45.6185	60.4131
0.1321	0.246094	0.328241	0.425723	0.531256	0.605067	0.738281	0.858378	1.01467	1.20329	1.43496	1.78967	2.17357	2.83277	3.76623	6.03402	9.51495	16.9823	24.4637	34.6627	45.6425	60.4426
0.132368	0.246094	0.328484	0.426181	0.53219	0.605114	0.738281	0.858889	1.01467	1.20404	1.43496	1.79159	2.18363	2.84333	3.78927	6.04448	9.58503	17.1062	24.4679	34.7027	45.72	60.7909
0.132399	0.246094	0.328688	0.426254	0.532286	0.605432	0.738281	0.861795	1.01467	1.20624	1.43537	1.79953	2.18692	2.85545	3.80517	6.05559	9.62084	17.1449	24.4923	34.9181	45.9139	61.3002
0.132568	0.246094	0.329786	0.426672	0.533232	0.60558	0.738281	0.862638	1.01467	1.21339	1.4367	1.80517	2.19939	2.85975	3.8204	6.07397	9.66204	17.2746	24.5654	34.9849	46.108	61.4283
0.132569	0.246094	0.329877	0.426917	0.533676	0.606078	0.738281	0.862866	1.01467	1.21416	1.43686	1.80672	2.20113	2.87304	3.84413	6.08085	9.69305	17.3214	24.7348	34.9854	46.1125	61.4752
0.132642	0.246094	0.330926	0.426947	0.533949	0.607609	0.738281	0.865956	1.01467	1.21602	1.44052	1.81148	2.20301	2.87559	3.85072	6.09299	9.77025	17.406	24.9264	35.0474	46.3058	61.6109
0.132846	0.246094	0.331948	0.427828	0.537059	0.607785	0.738281	0.867028	1.01467	1.21912	1.4444	1.81585	2.20378	2.88045	3.85072	6.11905	9.78674	17.6297	24.9419	35.0782	46.4027	61.6166
0.132863	0.246094	0.332495	0.428566	0.53751	0.608855	0.738281	0.868633	1.01467	1.22019	1.44952	1.82693	2.2093	2.8845	3.85315	6.15458	9.79302	17.7846	24.9796	35.0999	46.4203	61.6342
0.132944	0.246094	0.33253	0.429471	0.537644	0.610219	0.738281	0.8696	1.0164	1.22925	1.45725	1.83128	2.21124	2.88783	3.87515	6.20117	9.84151	17.8211	24.9839	35.163	46.5285	61.7881
0.133043	0.246094	0.333451	0.42966	0.538764	0.610396	0.738281	0.872598	1.01645	1.23047	1.45732	1.85016	2.21367	2.8927	3.88255	6.22325	9.84498	17.8499	25.0255	35.2146	46.5853	62.1012
0.133409	0.246094	0.33358	0.430059	0.539485	0.610781	0.738281	0.873862	1.01748	1.23047	1.46481	1.85184	2.21469	2.89834	3.88314	6.26015	9.88183	17.9353	25.0732	35.2818	46.675	62.4219
0.13343	0.246094	0.334573	0.430229	0.540166	0.61194	0.738281	0.87565	1.01776	1.23047	1.46537	1.85209	2.21484	2.90292	3.90658	6.30962	9.89197	17.9851	25.0923	35.375	46.8461	62.6715
0.133709	0.246094	0.334656	0.43068	0.541661	0.612046	0.738281	0.875836	1.01815	1.23047	1.47656	1.85623	2.21873	2.90558	3.91228	6.32926	9.96913	17.9919	25.2033	35.5149	46.8815	62.9648
0.133889	0.246094	0.334742	0.43273	0.542271	0.612735	0.738281	0.876981	1.01855	1.23047	1.47656	1.85674	2.22117	2.90711	3.91938	6.34421	9.99177	18.0493	25.3506	35.5659	46.8959	63.2077
0.134241	0.246094	0.334883	0.433382	0.542289	0.613908	0.738281	0.877381	1.02272	1.23047	1.47677	1.85991	2.22846	2.91137	3.92197	6.3603	10.026	18.095	25.3656	35.6767	47.093	63.7131
0.13454	0.246094	0.335087	0.433522	0.542397	0.614348	0.738281	0.87852	1.02272	1.23047	1.47811	1.86057	2.23111	2.92813	3.92197	6.36392	10.2139	18.1748	25.4811	35.6817	47.1742	63.8569
0.134614	0.246094	0.335791	0.434092	0.54365	0.615163	0.738281	0.879335	1.02431	1.23047	1.4783	1.87305	2.23178	2.93238	3.92197	6.40134	10.3151	18.2	25.5331	35.7155	47.1817	64.2305
0.13494	0.246094	0.336273	0.434573	0.545703	0.617061	0.738281	0.87965	1.02524	1.23047	1.47834	1.87307	2.2404	2.94678	3.92197	6.41734	10.3171	18.2509	25.5601	35.7738	47.2573	64.5308
0.135003	0.246094	0.336314	0.434851	0.54717	0.617182	0.738281	0.880298	1.02561	1.23047	1.48003	1.89092	2.24248	2.95096	3.94615	6.42534	10.3177	18.3501	25.7009	35.929	47.2724	64.7635
0.135845	0.246094	0.336483	0.435578	0.547791	0.620679	0.738281	0.881835	1.02569	1.23047	1.48871	1.89383	2.24338	2.95458	3.94878	6.42574	10.3389	18.4154	25.7775	35.9779	47.4678	64.9888
0.136157	0.246094	0.337946	0.436863	0.548456	0.622889	0.738281	0.883181	1.02659	1.23047	1.48886	1.90494	2.25683	2.96121	3.97309	6.48672	10.3447	18.4182	25.8597	36.3224	47.4704	65.1759
0.136213	0.246094	0.337961	0.437757	0.548556	0.623594	0.738281	0.883514	1.02693	1.23047	1.49382	1.90529	2.26089	2.96336	3.98444	6.53809	10.3833	18.5733	25.9497	36.3532	47.6069	65.1914
0.136273	0.246094	0.33827	0.439796	0.548597	0.623758	0.738281	0.887304	1.03036	1.23047	1.49423	1.91547	2.26901	2.96403	3.98965	6.5503	10.4298	18.6204	25.9591	36.3606	47.7794	65.59
0.136964	0.246094	0.338848	0.439974	0.548808	0.627962	0.738281	0.887304	1.03143	1.23047	1.49578	1.91717	2.27107	2.97519	4.00825	6.59031	10.4733	18.6853	25.9908	36.4165	47.9713	65.71
0.137055	0.246094	0.338943	0.441442	0.549204	0.630092	0.738281	0.887304	1.03175	1.23047	1.49635	1.91762	2.2747	2.98362	4.03791	6.64577	10.4789	18.7799	25.9993	36.4194	47.9884	65.7476
0.137692	0.246094	0.339123	0.442188	0.549293	0.630667	0.738281	0.887304	1.03598	1.23047	1.49655	1.92205	2.27868	2.99716	4.0561	6.6496	10.4962	18.8319	26.0608	36.4645	48.2657	65.7545
0.13782	0.246094	0.33954	0.44453	0.549491	0.632094	0.738281	0.887304	1.03951	1.23161	1.49693	1.92603	2.28057	2.99716	4.06414	6.66139	10.4967	18.8662	26.1932	36.5225	48.3378	66.1062
0.138168	0.246094	0.340098	0.444684	0.550282	0.633135	0.738281	0.887304	1.03997	1.2349	1.50881	1.92897	2.28085	2.99716	4.08788	6.7326	10.535	18.8744	26.271	36.556	48.3978	66.117
0.138341	0.246094	0.341222	0.445177	0.550282	0.633245	0.743213	0.887304	1.04409	1.23688	1.51258	1.92999	2.28688	3.00007	4.09843	6.80125	10.5529	18.9685	26.2982	36.5948	48.5006	66.1776
0.138417	0.246094	0.341952	0.445345	0.550282	0.633275	0.743452	0.887304	1.04409	1.24023	1.5129	1.93049	2.28703	3.01762	4.10562	6.81503	10.5679	18.9721	26.345	36.6058	48.5054	66.9922
0.138568	0.246094	0.342245	0.445383	0.550282	0.634685	0.744141	0.887304	1.04409	1.24023	1.51502	1.93608	2.28869	3.01762	4.10591	6.83339	10.5828	19.0178	26.3514	36.6251	48.5878	67.0048
0.138616	0.246094	0.342662	0.445415	0.550282	0.635089	0.744141	0.887304	1.04409	1.24774	1.51902	1.93781	2.28877	3.02183	4.14724	6.83362	10.5868	19.1007	26.4318	36.7307	48.7972	67.7859
0.13864	0.246094	0.343304	0.445796	0.550282	0.637749	0.744141	0.887304	1.04409	1.24781	1.53239	1.94215	2.29307	3.02266	4.15706	6.90533	10.7889	19.1364	26.5591	36.8063	48.9848	67.9333
0.138731	0.246094	0.343725	0.446322	0.550282	0.640296	0.744141	0.887304	1.04409	1.24815	1.54249	1.9423	2.31129	3.0254	4.15802	6.93513	10.819	19.252	26.5963	36.8336	49.244	68.257
0.138979	0.246094	0.343939	0.446918	0.550282	0.640358	0.744141	0.887304	1.04491	1.24843	1.544	1.94303	2.31203	3.0406	4.16044	6.96305	10.8197	19.4484	26.6053	36.8385	49.2833	69.0109
0.138991	0.246094	0.34559	0.447055	0.550282	0.642422	0.744141	0.887304	1.04601	1.2522	1.54602	1.94494	2.31311	3.04926	4.16441	7.00266	10.8696	19.5171	26.6419	36.8657	49.3015	71.4076
0.139032	0.246094	0.345702	0.447935	0.550282	0.646824	0.744141	0.887304	1.04666	1.2529	1.54976	1.9467	2.31841	3.05436	4.17839	7.02774	10.9029	19.5637	26.7443	36.8708	49.3632	72.6822
0.139045	0.246094	0.346271	0.44855	0.550282	0.647454	0.744293	0.888036	1.04679	1.25374	1.55302	1.94835	2.32194	3.0884	4.18748	7.03946	10.916	19.5856	26.7881	36.9219	49.3893	72.7938
0.139224	0.246094	0.346331	0.449458	0.550282	0.651129	0.746872	0.889808	1.04932	1.25484	1.55643	1.95005	2.3227	3.09864	4.20138	7.04301	10.9929	19.6454	26.8175	37.1596	49.4085	73.3881
0.139502	0.246094	0.34675	0.44971	0.550282	0.651502	0.750506	0.893069	1.04933	1.25484	1.57284	1.95036	2.32737	3.09988	4.21025	7.10298	11.0659	19.7388	26.8453	37.1913	49.6474	74.5593
0.139552	0.246094	0.346915	0.450028	0.550282	0.652532	0.754639	0.89409	1.04974	1.25484	1.57573	1.95277	2.33465	3.11664	4.21507	7.10811	11.093	19.7838	27.0132	37.2517	49.6823	75.617
0.139726	0.246094	0.348029	0.450522	0.550282	0.655145	0.755018	0.894123	1.0499	1.25484	1.57577	1.95338	2.33474	3.12618	4.23083	7.1748	11.1609	19.7852	27.0446	37.3287	49.9964	76.3783
0.13974	0.246094	0.348029	0.450975	0.550282	0.655379	0.756063	0.895377	1.05107	1.25484	1.57577	1.95648	2.34007	3.12825	4.24185	7.19763	11.323	19.7984	27.1118	37.4975	50.0934	77.139
0.139984	0.246094	0.348029	0.4511	0.550282	0.6563	0.756174	0.895622	1.05241	1.25484	1.57577	1.96099	2.34007	3.13694	4.25625	7.24342	11.3384	19.8696	27.2879	37.4982	50.1066	78.5097
0.140187	0.246094	0.348029	0.451529	0.550282	0.658148	0.756505	0.9014	1.05588	1.25484	1.57577	1.9633	2.36305	3.13757	4.26756	7.25539	11.3891	19.8884	27.3268	37.596	50.312	79.1292
0.14029	0.246094	0.348029	0.451671	0.550282	0.658352	0.761426	0.902917	1.05795	1.25484	1.5765	1.96619	2.36818	3.13786	4.2826	7.30995	11.4468	19.9066	27.3873	37.6419	50.4345	79.3086
0.140322	0.246094	0.348029	0.455682	0.550282	0.658561	0.763886	0.90323	1.05884	1.25484	1.57856	1.96672	2.36874	3.1413	4.29499	7.31826	11.4493	19.9163	27.3952	37.6742	50.5918	82.3605
0.140569	0.246094	0.348029	0.456113	0.550282	0.659221	0.766166	0.903603	1.05897	1.25484	1.58	1.96824	2.37455	3.14506	4.30727	7.40491	11.4827	19.9277	27.4051	37.8722	50.5927	82.4211
0.14061	0.246094	0.348029	0.457544	0.550282	0.660176	0.768362	0.903759	1.06398	1.25484	1.58399	1.96875	2.37854	3.14685	4.34191	7.43315	11.5023	19.9641	27.4918	37.8878	50.6532	82.5955
0.141062	0.246094	0.348029	0.457572	0.550282	0.660209	0.77066	0.906167	1.06426	1.25484	1.58827	1.96875	2.3879	3.15069	4.34196	7.45792	11.5588	19.9715	27.4994	37.9051	50.777	83.8509
0.141101	0.246094	0.348029	0.458166	0.550282	0.663838	0.771894	0.908421	1.07033	1.25484	1.59018	1.96875	2.40974	3.15339	4.36171	7.45858	11.6157	20.186	27.6666	37.9449	50.7926	83.9849
0.141147	0.246094	0.348029	0.458839	0.550282	0.664542	0.77342	0.909588	1.07826	1.25484	1.59484	1.97004	2.43297	3.15547	4.37327	7.51691	11.6395	20.2262	27.7561	37.9921	50.8206	84.198
0.141333	0.246094	0.348029	0.45892	0.550282	0.665425	0.774613	0.910531	1.07852	1.25532	1.59607	1.97016	2.44111	3.16018	4.37389	7.53043	11.7392	20.2943	27.9228	38.0055	50.8227	85.0139
0.141381	0.246094	0.348029	0.460254	0.550282	0.665616	0.776035	0.910641	1.0795	1.2648	1.59771	1.97043	2.44705	3.16449	4.38315	7.56102	11.7929	20.3893	27.9348	38.0084	50.9822	85.6972
0.14145	0.246094	0.348029	0.460829	0.550282	0.666133	0.778217	0.911028	1.07977	1.26532	1.60077	1.97631	2.4487	3.16819	4.4365	7.57865	11.8105	20.3917	27.9699	38.0096	51.2281	87.0497
0.141457	0.246094	0.348029	0.460936	0.550282	0.669555	0.778217	0.91245	1.08473	1.26686	1.61051	1.97697	2.45534	3.17307	4.46916	7.58346	11.8415	20.4384	27.9977	38.1453	51.4195	87.5742
0.141481	0.246094	0.348029	0.461131	0.550282	0.67013	0.778217	0.914633	1.08686	1.2735	1.61107	1.97754	2.46042	3.18902	4.47173	7.59283	11.8778	20.5279	28.0169	38.1453	51.6874	88.266
0.141594	0.246094	0.348029	0.461152	0.550282	0.67277	0.778217	0.914788	1.09454	1.28366	1.61727	1.97959	2.46672	3.20136	4.49263	7.63287	11.9187	20.5838	28.2456	38.1702	51.9705	89.5511
0.141636	0.246094	0.348029	0.462783	0.550282	0.674379	0.778217	0.915258	1.09673	1.28519	1.61727	1.98379	2.47621	3.20434	4.50995	7.63576	11.926	20.659	28.3377	38.2653	51.9775	89.6891
0.141728	0.246094	0.348029	0.462817	0.550282	0.674546	0.778217	0.919617	1.09683	1.2886	1.63551	1.98407	2.48026	3.20673	4.51868	7.69345	11.9787	20.7212	28.3762	38.3333	52.0368	90.2228
0.142067	0.246094	0.348029	0.462843	0.550282	0.677286	0.778217	0.921781	1.09776	1.29574	1.63717	1.98438	2.49279	3.21043	4.5204	7.7369	11.9947	20.7391	28.3904	38.4175	52.0582	90.5224
0.142125	0.246094	0.348029	0.464384	0.550282	0.678457	0.778217	0.924919	1.09963	1.29948	1.63865	1.98438	2.49284	3.22091	4.53449	7.7414	12.0521	20.9077	28.4543	38.4268	52.1037	90.8463
0.142734	0.246094	0.348029	0.464997	0.550282	0.68186	0.778217	0.925132	1.10056	1.30176	1.63951	1.98734	2.49488	3.22461	4.53774	7.78488	12.0586	20.9255	28.4565	38.4922	52.8945	90.8659
0.142972	0.246094	0.348029	0.465047	0.550282	0.682153	0.778217	0.926775	1.10056	1.30993	1.64466	1.98953	2.49692	3.22461	4.53774	7.84179	12.0897	20.9541	28.7887	38.6409	52.8952	91.2816
0.143006	0.246094	0.348029	0.46537	0.550282	0.682992	0.778217	0.929732	1.10056	1.31002	1.64488	1.99224	2.50177	3.22461	4.5458	7.88692	12.1277	20.9541	28.9218	38.6993	52.934	92.678
0.143062	0.246094	0.348029	0.465635	0.550282	0.683141	0.778217	0.930164	1.10056	1.31025	1.64779	1.99418	2.50515	3.22461	4.54747	7.92041	12.1448	20.9611	29.0551	38.8022	53.0267	93.9833
0.143095	0.246094	0.348029	0.466836	0.550282	0.684269	0.778217	0.935381	1.10056	1.31127	1.65085	1.99561	2.51072	3.23087	4.5502	7.9444	12.1772	21.0201	29.0557	38.9834	53.0517	95.8354
0.143475	0.246094	0.348029	0.4671	0.550282	0.684403	0.778217	0.936288	1.10056	1.31348	1.65085	1.99882	2.51094	3.23104	4.56623	8.0016	12.2149	21.0392	29.1835	39.0262	53.3086
0.143497	0.246094	0.348029	0.46891	0.550282	0.68469	0.778217	0.938921	1.10056	1.31403	1.65136	1.99985	2.51357	3.23429	4.57562	8.08013	12.2381	21.1017	29.1859	39.0451	53.4617
0.143664	0.246094	0.348029	0.471247	0.550282	0.685476	0.778217	0.944373	1.10056	1.31755	1.65284	2.00142	2.51957	3.24269	4.57971	8.12955	12.2633	21.1938	29.2075	39.2575	53.502
0.143683	0.246094	0.348029	0.471986	0.550282	0.685716	0.778217	0.946288	1.10056	1.31764	1.65346	2.00276	2.52532	3.24276	4.6339	8.16158	12.558	21.2038	29.2106	39.309	53.5609
0.143693	0.246094	0.348029	0.472183	0.550282	0.685813	0.778217	0.947015	1.10056	1.32355	1.65544	2.00457	2.52959	3.24969	4.64329	8.18555	12.5943	21.2047	29.2178	39.3582	53.6894
0.143754	0.246094	0.348029	0.473124	0.550282	0.688339	0.778217	0.947134	1.10056	1.32482	1.65845	2.00744	2.52959	3.25655	4.65144	8.21278	12.6723	21.2294	29.2479	39.3777	53.71
0.143781	0.246094	0.348029	0.473251	0.550282	0.68902	0.778217	0.949009	1.10056	1.32526	1.66248	2.01388	2.52959	3.2567	4.68059	8.24198	12.8072	21.3161	29.3521	39.4627	53.7342
0.143966	0.246094	0.348029	0.474772	0.550282	0.689042	0.778217	0.949355	1.10056	1.32526	1.66969	2.01811	2.53097	3.26255	4.69603	8.27384	12.8197	21.4302	29.4177	39.6315	53.8479
0.144275	0.246094	0.348029	0.475225	0.550282	0.689202	0.778217	0.950786	1.10479	1.32526	1.67421	2.01908	2.53769	3.26872	4.72767	8.45846	12.876	21.5603	29.4233	39.6936	54.0651
0.144478	0.246094	0.348029	0.477392	0.550282	0.689891	0.778217	0.95442	1.10613	1.32526	1.67666	2.02662	2.54354	3.2717	4.73202	8.47737	12.94	21.6304	29.4614	39.8696	54.214
0.144562	0.246094	0.348029	0.477513	0.550282	0.690584	0.778217	0.955027	1.10762	1.32526	1.67909	2.03247	2.55148	3.27174	4.75322	8.49148	13.0017	21.6391	29.5558	39.8862	54.3302
0.144587	0.246094	0.348029	0.478636	0.550282	0.690969	0.778217	0.957214	1.10919	1.32526	1.67961	2.03328	2.57454	3.27208	4.75447	8.49687	13.1907	21.6395	29.6468	39.975	54.7379
0.144612	0.246094	0.348029	0.479423	0.550282	0.691565	0.778217	0.959641	1.1093	1.32526	1.68116	2.03334	2.58773	3.27414	4.78947	8.50402	13.2062	21.6619	29.6873	39.9836	55.1182
0.144797	0.246094	0.348029	0.480626	0.550282	0.691708	0.778217	0.964484	1.11234	1.32543	1.68544	2.03674	2.58847	3.27659	4.80117	8.52307	13.2095	21.6952	29.7765	40.1876	55.3167
0.144815	0.246094	0.348029	0.480721	0.550282	0.695067	0.778217	0.966884	1.11278	1.33124	1.68599	2.04088	2.58969	3.28485	4.83089	8.59102	13.2297	21.6989	29.7821	40.1919	55.4261
0.145042	0.246094	0.348029	0.48164	0.550282	0.695133	0.778217	0.966976	1.11449	1.33165	1.69294	2.04219	2.59082	3.29519	4.8314	8.59569	13.2567	21.7542	29.8027	40.3537	55.5042
0.1453	0.246094	0.348029	0.481707	0.550282	0.696058	0.778217	0.967045	1.12074	1.33577	1.69481	2.04506	2.59122	3.30224	4.86012	8.6168	13.3731	21.8707	29.8139	40.3846	55.6809
0.145545	0.246094	0.348029	0.481737	0.550282	0.696058	0.778217	0.968536	1.12603	1.34888	1.69921	2.04543	2.5916	3.31215	4.90311	8.6178	13.591	21.957	29.8929	40.4134	55.7451
0.146057	0.246094	0.348029	0.482662	0.550282	0.696058	0.778217	0.973889	1.12676	1.35237	1.70942	2.04632	2.59484	3.31576	4.91347	8.65325	13.6988	22.0174	30.0538	40.5059	55.8269
0.146133	0.246094	0.348029	0.482787	0.550282	0.696058	0.778217	0.979062	1.13311	1.3599	1.70947	2.04785	2.59694	3.31978	4.94487	8.69578	13.7327	22.0384	30.255	40.8311	55.8722
0.14615	0.246094	0.348029	0.482925	0.550282	0.696058	0.778217	0.98224	1.13372	1.3605	1.70987	2.04946	2.59696	3.32748	4.94876	8.70508	13.7681	22.067	30.286	40.9608	55.8974
0.146295	0.246094	0.348029	0.483688	0.550282	0.696058	0.778217	0.983036	1.13897	1.3678	1.71276	2.05056	2.61106	3.34038	4.95254	8.73553	13.8606	22.0693	30.3143	41.0206	55.9942
0.146295	0.246094	0.348029	0.484821	0.550282	0.696058	0.778217	0.983976	1.14277	1.37618	1.71393	2.05404	2.61676	3.34636	4.98433	8.7648	13.9459	22.0935	30.429	41.0665	56.0855
0.146314	0.246303	0.348029	0.484988	0.550282	0.696058	0.778217	0.984375	1.14649	1.37839	1.71866	2.06268	2.61965	3.34728	4.99973	8.76743	13.9642	22.1172	30.5358	41.1507	56.127
0.146453	0.246407	0.348029	0.485807	0.550282	0.696058	0.778217	0.984375	1.15415	1.3804	1.72266	2.06846	2.62471	3.34972	5.00961	8.79292	13.9761	22.1286	30.5979	41.3834	56.5355
0.146502	0.246626	0.348029	0.485833	0.550978	0.696058	0.778217	0.984375	1.15432	1.38459	1.72348	2.07	2.62626	3.37068	5.01644	8.79385	13.9851	22.1608	30.6134	41.4966	56.5643
0.147157	0.246793	0.348029	0.486019	0.552891	0.696058	0.778217	0.984375	1.15525	1.38804	1.72781	2.07219	2.62935	3.3738	5.01747	8.85204	13.9875	22.1875	30.6665	41.6494	56.6361
0.147622	0.247467	0.348029	0.488024	0.553946	0.696058	0.778217	0.984375	1.1579	1.38982	1.72799	2.07326	2.63193	3.3738	5.02463	8.87159	14.0775	22.2483	30.893	41.6536	56.815
0.147742	0.248047	0.348029	0.488811	0.553993	0.696058	0.778217	0.984375	1.16219	1.3903	1.73334	2.07415	2.63672	3.3738	5.05697	8.96654	14.122	22.444	30.8953	41.7258	56.9394
0.147816	0.248047	0.348029	0.489314	0.55465	0.696058	0.778217	0.984375	1.16269	1.39212	1.73633	2.07526	2.63868	3.37809	5.06256	8.98762	14.1261	22.4688	30.9388	41.7729	57.152
0.148191	0.248047	0.348029	0.489911	0.55465	0.696058	0.778217	0.984375	1.16362	1.39212	1.73914	2.08588	2.63986	3.41884	5.07335	9.0253	14.1734	22.5964	31.0947	41.8207	57.1887
0.148292	0.248047	0.348029	0.491476	0.55465	0.696651	0.778993	0.984375	1.1648	1.39299	1.74015	2.09741	2.64026	3.43223	5.13222	9.0253	14.2606	22.6756	31.1468	41.946	57.2306
0.148354	0.248047	0.348029	0.492188	0.55465	0.69743	0.781177	0.984375	1.1651	1.39682	1.74015	2.10013	2.64666	3.44598	5.13931	9.02904	14.3095	22.6847	31.1676	42.0306	57.2518
0.148374	0.248047	0.348029	0.492188	0.55465	0.699332	0.782307	0.984375	1.16674	1.40233	1.74241	2.10021	2.64923	3.45489	5.14491	9.04355	14.4218	22.6888	31.1948	42.0903	57.3356
0.148653	0.248047	0.348029	0.492188	0.55465	0.699673	0.782512	0.984375	1.16676	1.40576	1.74521	2.10163	2.65051	3.45489	5.17382	9.04962	14.7861	22.8777	31.2295	42.4083	57.4594
0.148802	0.248047	0.348029	0.492188	0.55465	0.700494	0.78426	0.985438	1.17177	1.40753	1.74551	2.1071	2.65253	3.45489	5.17798	9.10518	14.8146	22.8916	31.2361	42.4225	57.5576
0.149104	0.248047	0.348029	0.492188	0.55465	0.701583	0.784393	0.986186	1.17825	1.4078	1.74872	2.10818	2.65286	3.45489	5.18246	9.11092	14.8479	22.8959	31.3344	42.5026	57.732
0.149107	0.248047	0.348029	0.492188	0.55538	0.701687	0.784393	0.988509	1.18002	1.41398	1.75396	2.11823	2.6636	3.45655	5.18893	9.11686	15.0299	22.9198	31.391	42.5412	57.8912
0.149523	0.248047	0.348029	0.492188	0.556428	0.703069	0.785326	0.991246	1.18464	1.41962	1.75396	2.13345	2.66651	3.49145	5.27745	9.12665	15.0903	22.9287	31.4452	42.8256	57.9698
0.149598	0.248047	0.348029	0.492188	0.557222	0.703689	0.786476	0.992188	1.19006	1.42609	1.75396	2.13456	2.66722	3.49524	5.2831	9.13399	15.2994	22.9482	31.4713	43.1561	58.1515
0.149613	0.248047	0.348029	0.492188	0.557267	0.703871	0.788782	0.992254	1.19071	1.4305	1.75721	2.13744	2.67155	3.49699	5.2986	9.13511	15.3843	23.0179	31.581	43.2389	58.227
0.149678	0.248047	0.348029	0.492188	0.558235	0.704117	0.789772	0.995022	1.19531	1.43496	1.76739	2.14059	2.6845	3.4984	5.30647	9.20759	15.4779	23.088	31.5887	43.4164	58.6477
0.149728	0.248047	0.348029	0.492188	0.560081	0.706694	0.792937	0.997614	1.19725	1.43496	1.76788	2.14481	2.69525	3.49873	5.30747	9.27243	15.6191	23.1132	31.6094	43.4316	58.6671
0.150117	0.248047	0.348029	0.492188	0.562416	0.706847	0.796096	0.998132	1.19744	1.43496	1.77278	2.14519	2.69715	3.50791	5.30843	9.28928	15.6363	23.1195	31.6268	43.7768	58.8436
0.150561	0.248047	0.348029	0.492188	0.562807	0.709514	0.798618	0.998431	1.20367	1.43496	1.77314	2.14539	2.69869	3.51822	5.31243	9.32396	15.736	23.1302	31.642	43.8489	58.8646
0.150574	0.248047	0.348165	0.492188	0.563091	0.713197	0.801405	0.998773	1.20777	1.43496	1.77364	2.15564	2.70091	3.52361	5.31854	9.32734	15.798	23.141	31.6611	43.8723	59.4534
0.150938	0.248047	0.348236	0.492188	0.564763	0.713756	0.80158	1.00001	1.20938	1.43496	1.77461	2.15876	2.70154	3.53749	5.368	9.3548	15.8181	23.1815	31.7421	43.8883	59.9319
0.151121	0.248047	0.34862	0.492188	0.565451	0.714216	0.806386	1.00092	1.21358	1.43496	1.77461	2.15891	2.70573	3.55149	5.37058	9.37097	15.8439	23.1969	31.8341	43.9575	60.0917
0.151177	0.248047	0.348761	0.492188	0.567204	0.715499	0.8083	1.00103	1.21474	1.43496	1.77546	2.16738	2.7166	3.56379	5.39541	9.40236	15.9038	23.2476	31.8816	44.0617	60.2181
0.151194	0.248047	0.349223	0.492188	0.567382	0.718053	0.808981	1.00404	1.22227	1.44023	1.77669	2.18054	2.71788	3.57204	5.40126	9.4241	15.9612	23.3092	31.9407	44.1691	60.3728
0.151319	0.248047	0.349298	0.492188	0.567905	0.718874	0.809035	1.00455	1.22816	1.44161	1.77851	2.18321	2.71819	3.58318	5.41318	9.42565	16.1059	23.4187	31.9793	44.1774	60.591
0.151524	0.248047	0.349354	0.492188	0.568635	0.719045	0.810196	1.0065	1.23047	1.44635	1.77893	2.18662	2.72087	3.58753	5.41801	9.42904	16.2057	23.4491	32.0288	44.2072	60.5936
0.151604	0.248047	0.350154	0.492188	0.569323	0.719182	0.811172	1.00837	1.23047	1.44969	1.78198	2.18721	2.73139	3.59051	5.44009	9.4978	16.3944	23.5158	32.0721	44.3526	60.6138
0.151757	0.248047	0.350791	0.492188	0.569735	0.719249	0.811889	1.01	1.23047	1.44973	1.78782	2.18941	2.73339	3.5925	5.44034	9.53646	16.5323	23.5318	32.0791	44.4502	60.6583
0.152017	0.248047	0.350791	0.492188	0.569988	0.720088	0.812717	1.01467	1.23047	1.45032	1.78846	2.19304	2.73928	3.60401	5.4468	9.61268	16.6526	23.5611	32.087	44.4722	60.6675
0.152254	0.248047	0.350791	0.492188	0.570072	0.720761	0.813647	1.01467	1.23047	1.45363	1.78858	2.19363	2.75056	3.61162	5.46417	9.61913	16.7709	23.6204	32.0979	44.4747	60.6702
0.152663	0.248378	0.350791	0.492188	0.571871	0.722118	0.815425	1.01467	1.23047	1.45438	1.78963	2.19442	2.75892	3.61162	5.47607	9.70821	16.882	23.6325	32.1092	44.5367	61.382
0.152763	0.249024	0.350791	0.492188	0.572162	0.725109	0.816118	1.01467	1.23047	1.46268	1.79159	2.19697	2.76647	3.61162	5.51006	9.71136	16.9018	23.6527	32.2044	44.5426	61.9242
0.152866	0.249032	0.350791	0.492188	0.572467	0.725957	0.820317	1.01467	1.23047	1.46765	1.79159	2.19821	2.76956	3.61162	5.51926	9.75144	16.9291	23.7082	32.2258	44.5966	62.0266
0.15325	0.249145	0.350791	0.492188	0.573997	0.727648	0.820859	1.01467	1.23047	1.47351	1.79159	2.20773	2.77133	3.61162	5.53869	9.81551	16.9528	23.7393	32.257	44.597	62.1012
0.153333	0.249194	0.350791	0.492188	0.574137	0.730989	0.823354	1.01467	1.23047	1.47436	1.79234	2.21452	2.77136	3.6246	5.54396	9.82199	17.0881	23.8241	32.4193	44.6341	62.1148
0.153621	0.249741	0.350791	0.492188	0.574155	0.731263	0.823879	1.01467	1.23047	1.47504	1.79511	2.21677	2.77249	3.65407	5.56153	9.82211	17.1062	23.8265	32.4554	44.6491	62.725
0.153624	0.24977	0.350791	0.492188	0.574828	0.732008	0.825243	1.01467	1.23047	1.47656	1.79554	2.2186	2.77325	3.65698	5.57613	9.85925	17.1911	23.9015	32.4752	44.6498	62.8543
0.153899	0.249851	0.350791	0.492188	0.575497	0.733496	0.825519	1.01467	1.23047	1.47656	1.79745	2.22098	2.77325	3.66237	5.58716	9.92036	17.2766	23.9963	32.4928	44.7097	62.9223
0.153936	0.250081	0.350791	0.492188	0.575641	0.733905	0.826661	1.01467	1.23047	1.48918	1.80276	2.2223	2.77325	3.66429	5.62492	10.039	17.2936	24.0527	32.544	44.7544	63.0098
0.154009	0.250596	0.350791	0.492188	0.576516	0.734449	0.828064	1.01467	1.23047	1.49153	1.80304	2.22253	2.77325	3.66521	5.63283	10.0417	17.3612	24.0863	32.5547	44.8236	63.1812
0.154195	0.251421	0.350791	0.492188	0.576743	0.736166	0.828171	1.01467	1.23141	1.49164	1.81683	2.23598	2.77414	3.68651	5.64573	10.0621	17.6022	24.0894	32.6218	44.8666	63.7963
0.15423	0.252161	0.350999	0.492188	0.57772	0.73697	0.830054	1.01467	1.23182	1.49693	1.82149	2.24615	2.78897	3.68748	5.6655	10.0859	17.6163	24.1009	32.7376	44.8728	63.8373
0.1543	0.252876	0.351072	0.492188	0.577721	0.738281	0.830975	1.01467	1.23833	1.49693	1.82749	2.24616	2.8059	3.68748	5.74118	10.0877	17.6169	24.1134	32.7409	44.8828	63.9346
0.154352	0.253318	0.351444	0.492188	0.579246	0.738281	0.831129	1.01467	1.2393	1.49887	1.83334	2.24857	2.80658	3.68748	5.78298	10.0928	17.6183	24.1494	32.7431	44.8932	64.0758
0.154359	0.253489	0.352381	0.492188	0.580949	0.738281	0.831146	1.01467	1.24023	1.50627	1.83623	2.25341	2.80926	3.68821	5.82469	10.2196	17.6262	24.1753	32.7469	44.9032	64.0888
0.154366	0.253755	0.352559	0.492188	0.582376	0.738281	0.835869	1.01467	1.24023	1.51029	1.83797	2.25973	2.81286	3.69945	5.89774	10.2204	17.7458	24.1797	32.7733	44.9403	64.127
0.154382	0.253801	0.352745	0.492188	0.585429	0.738281	0.838619	1.01467	1.24023	1.51034	1.8407	2.26106	2.82082	3.69972	5.96009	10.2461	17.774	24.2097	32.8433	45.1343	64.6808
0.154551	0.254118	0.352972	0.492188	0.586511	0.738281	0.842136	1.01467	1.24023	1.51322	1.84181	2.26295	2.82183	3.7207	5.97376	10.2995	17.8066	24.2187	32.8535	45.2085	64.8569
0.15507	0.254223	0.353257	0.492188	0.586606	0.738281	0.842442	1.01467	1.24451	1.51673	1.84848	2.26682	2.82944	3.72345	5.98111	10.3171	17.8611	24.2187	32.8671	45.2186	65.6718
0.155314	0.254327	0.353371	0.492188	0.587392	0.738281	0.842506	1.01467	1.24456	1.52183	1.84944	2.26887	2.83929	3.72488	5.99684	10.3484	17.9627	24.2454	32.8908	45.2269	66.0243
0.155383	0.254614	0.353591	0.492188	0.587688	0.738281	0.84445	1.01467	1.24766	1.52665	1.85006	2.26952	2.88028	3.72924	6.00458	10.3572	17.9647	24.2644	32.9006	45.3832	66.6245
0.156054	0.25488	0.353656	0.492188	0.58792	0.738281	0.846177	1.01467	1.25484	1.53271	1.85927	2.27804	2.88045	3.74862	6.02303	10.5055	18.0011	24.3832	32.9006	45.4163	67.0558
0.156097	0.255248	0.354168	0.492188	0.589729	0.738281	0.847463	1.01467	1.25484	1.53603	1.87081	2.27905	2.88196	3.75363	6.04335	10.5154	18.0849	24.3836	32.9044	45.52	67.9121
0.156207	0.255497	0.354498	0.492188	0.590876	0.738281	0.848922	1.01467	1.25484	1.53851	1.87419	2.2798	2.88541	3.76758	6.11825	10.5234	18.0992	24.3847	32.909	45.5684	68.4113
0.156454	0.25553	0.354763	0.492188	0.59139	0.738281	0.849307	1.01467	1.25484	1.53896	1.87587	2.28688	2.89038	3.77481	6.14685	10.6775	18.2104	24.5229	33.0148	45.6396	69.0036
0.156487	0.255582	0.354892	0.492188	0.59178	0.738281	0.849626	1.01467	1.25484	1.53972	1.87945	2.28688	2.89511	3.78622	6.15183	10.7253	18.2141	24.5249	33.0452	45.7588	69.0418
0.156511	0.256101	0.354976	0.492188	0.593581	0.738281	0.850044	1.01467	1.25484	1.54033	1.88166	2.28688	2.89531	3.8204	6.15804	10.7494	18.2563	24.6042	33.0619	45.8887	69.7753
0.156707	0.256143	0.355412	0.492188	0.593657	0.738281	0.851571	1.01467	1.25484	1.54147	1.88491	2.28688	2.89733	3.8234	6.17134	10.7835	18.2901	24.6414	33.1001	46.4326	72.0013
0.156735	0.256581	0.355583	0.492188	0.594973	0.738281	0.852427	1.01467	1.25484	1.54191	1.88567	2.2963	2.91332	3.84707	6.19722	10.8197	18.3051	24.6711	33.1029	46.4942	72.2213
0.157175	0.257169	0.355693	0.492188	0.595895	0.738281	0.853453	1.01467	1.25484	1.54417	1.8879	2.30029	2.91982	3.85072	6.19887	10.8327	18.3281	24.7285	33.279	46.5061	72.6501
0.157615	0.257202	0.356202	0.492188	0.597708	0.738281	0.854277	1.01663	1.25484	1.54644	1.89254	2.30432	2.92691	3.85072	6.24566	10.8393	18.3342	24.7537	33.2967	46.576	73.993
0.157769	0.257441	0.356624	0.492188	0.598228	0.738281	0.855369	1.02272	1.25484	1.54668	1.89715	2.32164	2.93562	3.85178	6.32613	10.8717	18.3405	24.8867	33.4227	46.7056	74.3014
0.157806	0.257778	0.356788	0.492188	0.599558	0.738281	0.855549	1.03121	1.25484	1.55142	1.90058	2.32164	2.94051	3.85198	6.39073	10.8717	18.3833	25.0268	33.438	46.7402	75.3662
0.157863	0.257827	0.357242	0.492188	0.600758	0.738281	0.855951	1.0315	1.25484	1.55263	1.90154	2.32286	2.94226	3.85229	6.39117	10.9666	18.3951	25.1088	33.6645	46.7521	75.8113
0.157931	0.257853	0.358158	0.492188	0.601576	0.738281	0.856624	1.03169	1.25484	1.55643	1.90329	2.32745	2.95608	3.8755	6.44922	11.0551	18.466	25.1222	33.7368	46.8637	76.4635
0.157962	0.25871	0.358271	0.492188	0.602762	0.738281	0.857905	1.03212	1.25484	1.55643	1.90625	2.32792	2.9569	3.88255	6.45399	11.0679	18.4718	25.1805	33.8518	46.9274	77.2315
0.157979	0.259044	0.358585	0.492188	0.60279	0.738281	0.858259	1.03222	1.25484	1.55643	1.91265	2.33414	2.95929	3.88649	6.45967	11.0885	18.4718	25.2886	33.8625	46.9386	78.5055
0.158074	0.259656	0.358844	0.492188	0.603073	0.738281	0.865882	1.03247	1.25562	1.55971	1.91375	2.33478	2.97356	3.89351	6.527	11.1062	18.5656	25.2914	33.889	47.1084	79.0476
0.158418	0.259981	0.359253	0.492188	0.603246	0.738281	0.866042	1.03445	1.25641	1.5638	1.9138	2.34007	2.98335	3.89392	6.55356	11.1326	18.6218	25.3104	33.9194	47.1508	79.3876
0.158451	0.260734	0.359801	0.492188	0.603854	0.738281	0.867339	1.03591	1.25712	1.56877	1.9192	2.34007	2.98442	3.91326	6.57092	11.1557	18.6386	25.4725	34.0034	47.1681	79.8562
0.158797	0.260757	0.360137	0.492188	0.604189	0.738281	0.867572	1.03706	1.25766	1.57024	1.91941	2.35078	2.99083	3.92197	6.58756	11.3115	18.7683	25.5188	34.0331	47.1708	81.0643
0.158988	0.260862	0.360193	0.492188	0.60653	0.738281	0.868604	1.0371	1.25821	1.57047	1.92112	2.3551	2.99241	3.92197	6.60476	11.323	18.7885	25.5899	34.0583	47.2301	81.5849
0.159027	0.261779	0.361633	0.492196	0.607051	0.738595	0.868736	1.04277	1.2626	1.57113	1.92205	2.35596	2.99484	3.92197	6.61872	11.324	18.826	25.6065	34.1074	47.3698	82.3753
0.15914	0.261917	0.361741	0.492523	0.607615	0.739255	0.87041	1.04409	1.2648	1.57305	1.92205	2.36632	2.99716	3.93717	6.65566	11.347	18.8662	25.6402	34.2008	47.8113	82.6146
0.159281	0.261921	0.361834	0.492626	0.608133	0.739561	0.872033	1.04409	1.2648	1.57489	1.92682	2.36772	2.99716	3.94018	6.66274	11.3964	18.9475	25.6904	34.2457	47.819	82.8904
0.15936	0.26193	0.362808	0.492689	0.608228	0.743802	0.872807	1.04409	1.26652	1.57577	1.92689	2.37052	2.99729	3.96983	6.67289	11.4003	18.987	25.7654	34.2666	47.959	83.3238
0.15948	0.262089	0.363002	0.494865	0.608966	0.744141	0.881205	1.04409	1.26653	1.57577	1.93201	2.37211	3.00453	3.9957	6.69163	11.5155	18.9956	25.7698	34.3283	48.1055	84.4015
0.160147	0.262106	0.363077	0.495901	0.609498	0.744141	0.881583	1.04409	1.27216	1.57577	1.93349	2.37248	3.01762	3.99849	6.70186	11.6268	19.1308	25.8769	34.401	48.2577	84.8453
0.160433	0.262355	0.3631	0.495974	0.609695	0.744141	0.881812	1.04409	1.27267	1.57577	1.93678	2.37668	3.0278	4.0072	6.70186	11.6608	19.2673	25.8839	34.5661	48.3635	85.0399
0.160502	0.262582	0.363897	0.496094	0.609794	0.744141	0.882208	1.04409	1.28041	1.57577	1.93731	2.38092	3.03213	4.0154	6.70536	11.6992	19.2682	25.9159	34.6424	48.3746	85.8289
0.160531	0.2626	0.36439	0.496094	0.611048	0.745184	0.883361	1.04409	1.28171	1.57577	1.93796	2.38743	3.03612	4.0371	6.75802	11.6992	19.2724	25.9507	34.6842	48.6534	86.0508
0.160608	0.262839	0.365547	0.496094	0.613253	0.74728	0.883868	1.04409	1.28429	1.57577	1.94045	2.38943	3.03773	4.03791	6.77993	11.7144	19.3203	26.28	34.6975	48.6745	86.4041
0.161454	0.262991	0.365708	0.496094	0.61333	0.748243	0.88684	1.04483	1.28738	1.57577	1.94149	2.39005	3.04225	4.04857	6.78663	11.8813	19.326	26.3685	34.8224	48.7362	87.1186
0.162043	0.263181	0.366474	0.496094	0.613404	0.748558	0.887214	1.04594	1.29318	1.57577	1.94242	2.39047	3.04401	4.04973	6.80549	12.0013	19.3831	26.4471	34.8698	48.8329	87.434
0.162547	0.263275	0.36691	0.496094	0.613714	0.749778	0.887304	1.04689	1.29573	1.57577	1.94263	2.39173	3.04524	4.05868	6.84805	12.0315	19.4102	26.4883	34.9471	49.0601	87.5433
0.163075	0.263323	0.367199	0.496094	0.61436	0.750121	0.887304	1.04786	1.29973	1.57879	1.9457	2.39276	3.04837	4.08171	6.87873	12.1657	19.5811	26.5388	34.9644	49.2701	88.1431
0.163099	0.26338	0.36742	0.496094	0.615989	0.752372	0.887304	1.04816	1.30779	1.58515	1.94721	2.3984	3.0492	4.10265	6.89186	12.2151	19.5856	26.5553	35.0284	49.5269	88.6677
0.163179	0.263638	0.367669	0.496094	0.616238	0.753739	0.887304	1.04965	1.30889	1.58639	1.95225	2.40038	3.05575	4.10371	6.90578	12.2983	19.7121	26.5922	35.0638	49.567	89.5068
0.163333	0.263741	0.368207	0.496094	0.61656	0.754486	0.887304	1.05099	1.31825	1.58827	1.95461	2.40051	3.05691	4.10591	6.93424	12.3047	19.7146	26.6248	35.0984	49.5924	90.676
0.163411	0.264462	0.368665	0.496094	0.617011	0.754489	0.887304	1.05154	1.32333	1.58827	1.96234	2.40415	3.05787	4.10973	6.94531	12.3377	19.7227	26.7951	35.1056	49.6747	92.0508
0.163537	0.264497	0.368912	0.496094	0.617192	0.757028	0.887304	1.05172	1.32459	1.59507	1.96666	2.41562	3.06468	4.13828	6.94812	12.385	19.755	26.8513	35.2065	49.765
0.163636	0.264695	0.369986	0.496094	0.617555	0.757433	0.887304	1.05284	1.32526	1.59563	1.96717	2.41744	3.0667	4.16057	6.94974	12.3854	19.7566	26.8669	35.272	49.8879
0.163808	0.264957	0.37015	0.496094	0.618324	0.758177	0.887304	1.05679	1.32526	1.59678	1.96785	2.42531	3.06817	4.16201	6.98891	12.4156	19.7683	26.9026	35.2746	49.9163
0.163841	0.265156	0.370613	0.496094	0.620517	0.760494	0.887304	1.05929	1.32526	1.60193	1.97535	2.42711	3.06817	4.17583	6.98947	12.4624	19.8102	26.9269	35.3022	49.948
0.16385	0.265536	0.370619	0.496094	0.621028	0.761839	0.887304	1.06273	1.32526	1.6037	1.9811	2.43116	3.0707	4.18359	7.04502	12.4721	19.923	26.9386	35.4395	50.0232
0.163853	0.265562	0.370948	0.496094	0.621109	0.763788	0.887304	1.06278	1.32526	1.60543	1.98407	2.43631	3.07102	4.18847	7.05907	12.5995	19.9359	26.9463	35.4676	50.0515
0.163945	0.265903	0.371604	0.496094	0.622918	0.766585	0.887304	1.06818	1.32526	1.61038	1.98407	2.43844	3.10096	4.19457	7.07664	12.6541	19.9664	27.0866	35.5211	50.2367
0.164095	0.266053	0.372692	0.496094	0.623098	0.767538	0.887304	1.06954	1.32526	1.61841	1.98407	2.45674	3.10355	4.2378	7.08797	12.6667	20.0067	27.1151	35.5381	50.3487
0.164136	0.266194	0.373181	0.496094	0.623219	0.767842	0.887304	1.07034	1.32526	1.62753	1.98407	2.45701	3.1038	4.24824	7.12338	12.6685	20.0903	27.1756	35.5891	50.3904
0.164532	0.266442	0.373193	0.496094	0.624626	0.76871	0.887304	1.07199	1.33063	1.63589	1.98438	2.4712	3.10687	4.25767	7.1323	12.6686	20.3995	27.1943	35.6043	50.5446
0.164607	0.266854	0.373403	0.496551	0.624963	0.769771	0.887304	1.0749	1.33073	1.6428	1.98904	2.47143	3.10738	4.2738	7.15367	12.6723	20.5147	27.2417	35.6057	50.6469
0.164609	0.267002	0.374058	0.49703	0.625604	0.77051	0.887304	1.07842	1.33494	1.6437	1.98963	2.47321	3.10911	4.28045	7.18173	12.7874	20.5151	27.3365	35.6115	50.7456
0.164683	0.267484	0.374337	0.497434	0.6274	0.771748	0.887304	1.0847	1.33577	1.64485	1.9922	2.47469	3.11287	4.29346	7.19284	12.8984	20.524	27.3375	35.6825	51.2454
0.164821	0.267493	0.375734	0.49752	0.627575	0.771791	0.887386	1.08496	1.33577	1.65085	1.9928	2.47523	3.11998	4.29784	7.20909	12.9366	20.5295	27.3503	35.8417	51.27
0.165102	0.267726	0.376002	0.497857	0.62777	0.772182	0.887529	1.08501	1.33577	1.65085	1.99569	2.47973	3.12474	4.30379	7.24835	12.9589	20.6603	27.3633	35.8806	51.856
0.1652	0.267872	0.376091	0.49959	0.628384	0.774725	0.887595	1.09238	1.33628	1.65085	1.99599	2.47996	3.12563	4.30862	7.28234	13.0777	20.6606	27.3676	35.9531	51.9183
0.165217	0.268445	0.377634	0.499653	0.628832	0.778217	0.887757	1.09251	1.33791	1.65085	2.00208	2.48047	3.13128	4.32769	7.2909	13.0801	20.6615	27.4303	36.0522	51.9272
0.165448	0.268645	0.378548	0.499928	0.628849	0.778217	0.892118	1.09281	1.33935	1.65142	2.00274	2.48281	3.13359	4.33905	7.39863	13.1184	20.7245	27.531	36.0908	51.979
0.165691	0.26879	0.378582	0.501408	0.629255	0.778217	0.893895	1.0945	1.34005	1.65187	2.01711	2.48836	3.13757	4.40226	7.42429	13.1332	20.7339	27.5723	36.1332	51.9916
0.165775	0.269207	0.378764	0.502229	0.629427	0.778217	0.894346	1.09911	1.35	1.66028	2.01734	2.4887	3.14174	4.40871	7.45031	13.1462	20.7762	27.5773	36.1617	52.1261
0.165832	0.269639	0.37957	0.502713	0.629877	0.778217	0.894346	1.10056	1.35097	1.66159	2.02426	2.49532	3.15103	4.42137	7.4884	13.2095	20.8087	27.6358	36.2114	52.3595
0.165894	0.269666	0.381345	0.503206	0.630017	0.778217	0.894346	1.10056	1.35376	1.6625	2.02467	2.50592	3.17574	4.46422	7.5046	13.2657	20.815	27.7663	36.2171	52.47
0.166267	0.26995	0.381898	0.503911	0.630897	0.778217	0.894346	1.10056	1.35442	1.66709	2.02892	2.50967	3.18002	4.46581	7.57197	13.2799	20.9284	27.8066	36.2198	52.4858
0.166828	0.270562	0.383596	0.504438	0.631552	0.778217	0.894346	1.10056	1.35476	1.67377	2.02934	2.516	3.19455	4.47173	7.5808	13.3255	20.96	27.9201	36.2429	52.5589
0.166845	0.270672	0.383602	0.504444	0.632747	0.778217	0.897125	1.10056	1.35578	1.6774	2.031	2.52317	3.2018	4.47447	7.5836	13.3783	20.9654	27.9391	36.2474	52.6496
0.167195	0.270978	0.38435	0.504467	0.634157	0.778217	0.900424	1.10056	1.35857	1.68017	2.0317	2.52959	3.20393	4.4758	7.60286	13.4911	21.091	27.9847	36.2538	52.6603
0.167277	0.271033	0.384351	0.506148	0.634617	0.778217	0.901233	1.10056	1.35883	1.68077	2.03215	2.52959	3.2062	4.498	7.62637	13.5561	21.1444	27.9951	36.2974	52.6798
0.167361	0.271212	0.385279	0.506198	0.635398	0.778217	0.901838	1.10056	1.36157	1.68137	2.03273	2.5339	3.22461	4.50533	7.6294	13.6587	21.1649	28.1882	36.3137	52.7017
0.167836	0.271431	0.386016	0.507613	0.635975	0.778217	0.901972	1.10056	1.36335	1.68405	2.03327	2.5377	3.22461	4.51895	7.63287	13.7235	21.1843	28.199	36.348	53.0018
0.167899	0.271806	0.386151	0.507846	0.64069	0.778217	0.905834	1.10056	1.36344	1.68891	2.03422	2.54006	3.22461	4.53774	7.64477	13.7812	21.1931	28.1997	36.3812	53.1693
0.167904	0.271902	0.387181	0.508922	0.642766	0.778217	0.90674	1.10056	1.3671	1.69515	2.03772	2.54311	3.22461	4.53774	7.75019	13.8361	21.2633	28.2174	36.4737	53.1816
0.168111	0.271969	0.387732	0.510246	0.647775	0.778217	0.90707	1.10162	1.36998	1.70534	2.04257	2.54769	3.22461	4.53774	7.76321	13.9459	21.277	28.2383	36.5017	53.5719
0.168286	0.272013	0.388337	0.510688	0.648123	0.778217	0.907124	1.10177	1.37387	1.71156	2.04655	2.5538	3.22461	4.53806	7.78488	13.9695	21.3691	28.2721	36.5592	53.7844
0.168376	0.27223	0.38915	0.510998	0.648781	0.778217	0.908297	1.10246	1.3813	1.71192	2.04721	2.557	3.22461	4.57534	7.80956	14.0571	21.4007	28.2817	36.6246	53.8031
0.168578	0.272339	0.389185	0.511148	0.649233	0.778217	0.908506	1.10473	1.39212	1.71388	2.04891	2.55968	3.22971	4.65819	7.82557	14.0963	21.4021	28.3531	36.6862	53.8421
0.168944	0.273168	0.389888	0.511519	0.649613	0.778217	0.909401	1.10629	1.39212	1.71465	2.05097	2.56161	3.23702	4.6605	7.84478	14.1035	21.4485	28.3676	36.7009	54.0052
0.169492	0.273582	0.390004	0.512085	0.649889	0.778217	0.909896	1.10955	1.39212	1.72011	2.06153	2.56362	3.23868	4.66181	7.84645	14.1734	21.5166	28.3695	36.7174	54.2517
0.169729	0.273616	0.390308	0.512703	0.651616	0.778217	0.911268	1.11306	1.39212	1.72266	2.06279	2.56744	3.28126	4.68513	7.86173	14.2416	21.5516	28.4111	36.8379	54.284
0.169813	0.274004	0.390438	0.512986	0.65369	0.778217	0.911837	1.11358	1.39212	1.72658	2.06321	2.56929	3.2833	4.70636	7.88005	14.287	21.6642	28.481	36.8495	54.3493
0.169947	0.274869	0.390721	0.513074	0.65401	0.778217	0.913326	1.11395	1.39569	1.72955	2.0655	2.56929	3.29129	4.73371	7.88209	14.3095	21.6858	28.6561	36.97	54.3868
0.170238	0.275189	0.391673	0.514261	0.655672	0.778217	0.916652	1.11952	1.3965	1.72997	2.0663	2.56929	3.30845	4.75631	7.92567	14.327	21.6975	28.7294	37.0881	54.4372
0.170796	0.276412	0.391848	0.514722	0.656542	0.778217	0.917834	1.12426	1.40012	1.7355	2.06784	2.56929	3.30936	4.76482	7.97378	14.3645	21.8819	28.8983	37.1404	54.5106
0.170943	0.27703	0.392647	0.515305	0.656701	0.778217	0.918799	1.12478	1.40217	1.7377	2.06891	2.56929	3.30936	4.7689	8.04481	14.4541	21.9037	28.9376	37.1542	54.5483
0.17096	0.277393	0.392777	0.518361	0.657125	0.778217	0.919241	1.12773	1.40259	1.74015	2.07071	2.56997	3.31695	4.77828	8.07582	14.5842	21.9077	28.9842	37.1982	54.5895
0.171101	0.277432	0.394353	0.519268	0.657236	0.778217	0.922444	1.12789	1.40488	1.74015	2.07916	2.57325	3.31735	4.79997	8.10326	14.6512	21.9604	29.0645	37.2287	54.8343
0.171448	0.277473	0.394689	0.519296	0.659107	0.778217	0.922515	1.13569	1.40848	1.74015	2.08646	2.57895	3.32265	4.8162	8.13444	14.9713	21.9913	29.0713	37.2427	54.9202
0.171457	0.277585	0.395553	0.519488	0.661283	0.778217	0.925767	1.13636	1.41388	1.74015	2.08722	2.58307	3.3333	4.86001	8.35433	14.9744	22.005	29.1055	37.3906	54.9251
0.1716	0.277865	0.396004	0.520288	0.662406	0.778217	0.928025	1.13903	1.41441	1.74015	2.10263	2.58516	3.34089	4.89188	8.37123	14.979	22.0364	29.1276	37.6208	55.0966
0.171872	0.278474	0.396138	0.521318	0.662787	0.778217	0.9305	1.13945	1.41521	1.74015	2.10263	2.58555	3.34724	4.8996	8.37421	15.1965	22.0517	29.14	37.6478	55.266
0.172029	0.278601	0.396303	0.521783	0.66321	0.778217	0.930645	1.14036	1.41568	1.74015	2.10263	2.58646	3.34811	4.90921	8.3802	15.2337	22.0887	29.2008	37.7308	55.4518
0.17203	0.278779	0.397244	0.52224	0.663234	0.778217	0.933645	1.14679	1.41639	1.74015	2.10734	2.58969	3.34862	4.93383	8.39438	15.2994	22.1005	29.214	37.9191	55.5578
0.173064	0.278818	0.39728	0.52331	0.663555	0.778217	0.934088	1.15141	1.42481	1.74015	2.11319	2.59332	3.34963	4.94025	8.41173	15.3388	22.1348	29.2212	38.0299	55.5823
0.173196	0.279363	0.397534	0.524183	0.664035	0.778217	0.936154	1.15611	1.42578	1.74432	2.11698	2.59582	3.36099	4.94169	8.42887	15.5533	22.135	29.2676	38.0917	55.7157
0.173588	0.280346	0.397937	0.525179	0.665549	0.778217	0.937394	1.16909	1.42631	1.74447	2.11785	2.59745	3.36137	5.03088	8.43359	15.5625	22.1856	29.343	38.2424	56.0788
0.173651	0.280479	0.398137	0.525888	0.666271	0.778217	0.93802	1.16971	1.43496	1.75328	2.12253	2.60917	3.36259	5.04451	8.43359	15.6464	22.2069	29.391	38.2676	56.3296
0.173669	0.281498	0.398726	0.526119	0.666272	0.778217	0.940873	1.17061	1.43496	1.75396	2.12587	2.61612	3.37354	5.07338	8.50004	15.6883	22.2132	29.48	38.2716	56.3764
0.173735	0.281515	0.398769	0.52627	0.667875	0.778217	0.941019	1.17572	1.43496	1.75396	2.13176	2.62904	3.3738	5.1163	8.52367	15.721	22.2358	29.4974	38.299	56.5357
0.173763	0.281547	0.39931	0.526501	0.668701	0.778217	0.94145	1.18641	1.43496	1.75396	2.13378	2.63813	3.3738	5.13028	8.54268	15.7211	22.25	29.5753	38.3503	56.577
0.174119	0.281898	0.399326	0.526824	0.66923	0.778217	0.941673	1.19118	1.43496	1.75396	2.13378	2.6382	3.3738	5.14667	8.60287	15.7988	22.2827	29.5757	38.4651	56.6513
0.174175	0.28223	0.399404	0.52706	0.669244	0.778217	0.943112	1.19158	1.43496	1.75396	2.139	2.64077	3.39273	5.147	8.6168	15.8	22.3985	29.5842	38.6685	56.7616
0.174225	0.282358	0.399851	0.533161	0.670596	0.778225	0.943136	1.1918	1.43496	1.75724	2.14232	2.64347	3.39657	5.1535	8.63074	15.8273	22.4148	29.6653	38.7483	56.8498
0.174512	0.282529	0.400404	0.534028	0.670607	0.778303	0.945224	1.19238	1.43496	1.75916	2.14326	2.65051	3.39927	5.16364	8.67128	15.8284	22.4617	29.6745	38.7943	57.0143
0.175465	0.28269	0.400936	0.534996	0.670934	0.779632	0.945422	1.19288	1.43792	1.75927	2.14753	2.65189	3.43237	5.17916	8.68967	15.9098	22.4878	29.7777	38.9769	57.1354
0.175479	0.283134	0.401163	0.536266	0.671	0.78028	0.94606	1.19336	1.44524	1.7639	2.15025	2.65457	3.43572	5.19499	8.69725	16.1076	22.6162	29.7891	39.0097	57.4984
0.175635	0.28333	0.402071	0.537138	0.671458	0.783126	0.947433	1.19463	1.44635	1.76671	2.15408	2.65902	3.44598	5.21592	8.70227	16.1185	22.747	29.8732	39.1439	57.6054
0.175868	0.283335	0.402239	0.537587	0.67413	0.783409	0.94812	1.20062	1.44801	1.76682	2.15726	2.66164	3.45489	5.22103	8.80452	16.1843	22.9217	29.9151	39.2531	57.7102
0.176093	0.283598	0.403077	0.539576	0.675083	0.783657	0.950963	1.20087	1.44944	1.76864	2.15967	2.66282	3.46707	5.22173	8.8312	16.2215	22.9224	30.0168	39.2649	57.8844
0.176139	0.284828	0.403512	0.540721	0.675537	0.783758	0.952946	1.20205	1.44946	1.7723	2.1627	2.6707	3.47116	5.23213	8.85326	16.3203	22.9244	30.0568	39.2902	58.2578
0.176921	0.28513	0.403531	0.541721	0.677437	0.784393	0.955379	1.20278	1.44948	1.77461	2.16467	2.67155	3.47852	5.23593	8.85475	16.3481	22.9466	30.0644	39.3827	58.263
0.177038	0.285438	0.403732	0.542837	0.679087	0.784393	0.955981	1.20627	1.45243	1.77461	2.16476	2.6817	3.48699	5.26187	8.87645	16.4294	22.9567	30.0682	39.4274	58.6194
0.17705	0.285867	0.403832	0.54296	0.67997	0.784393	0.959586	1.21173	1.45417	1.77554	2.16569	2.68282	3.50791	5.26556	8.95649	16.4482	22.9802	30.0765	39.4942	58.6477
0.177241	0.285883	0.404833	0.543626	0.680805	0.784393	0.960652	1.2186	1.45423	1.77823	2.16778	2.70619	3.50791	5.27403	9.0253	16.6739	23.0048	30.1944	39.6578	58.8551
0.177293	0.285981	0.406674	0.544265	0.682526	0.786138	0.965492	1.21996	1.45749	1.77872	2.1706	2.70743	3.52353	5.28764	9.03288	16.7075	23.0054	30.2201	39.8584	59.0774
0.177461	0.286677	0.408945	0.544558	0.683302	0.787298	0.969129	1.22042	1.45961	1.77876	2.17598	2.71249	3.52353	5.30102	9.06313	16.764	23.0416	30.2251	39.9599	59.2686
0.177565	0.286706	0.409038	0.544725	0.683333	0.791611	0.96942	1.22166	1.45969	1.77877	2.17917	2.71593	3.52353	5.30102	9.10879	16.7985	23.0533	30.3084	40.0545	59.509
0.177935	0.287124	0.409346	0.545902	0.68364	0.793897	0.975	1.22666	1.46039	1.78254	2.17978	2.72989	3.53372	5.30264	9.11729	16.8403	23.0665	30.3126	40.0708	59.5664
0.178038	0.287571	0.411386	0.547147	0.683743	0.794031	0.97684	1.22786	1.46095	1.78412	2.18365	2.73966	3.54664	5.3047	9.14512	16.8964	23.0843	30.3369	40.1958	59.8122
0.178144	0.287589	0.411664	0.547372	0.683912	0.796699	0.979258	1.2296	1.46239	1.78424	2.19099	2.7493	3.55149	5.34377	9.16659	17.025	23.0898	30.344	40.1985	59.9697
0.178245	0.287685	0.411924	0.549889	0.685591	0.799445	0.980498	1.23014	1.46509	1.7865	2.19251	2.75258	3.55149	5.37579	9.17994	17.0291	23.1184	30.4886	40.3837	60.1441
0.178295	0.28804	0.412442	0.550282	0.686091	0.801666	0.984375	1.23047	1.46533	1.78869	2.19494	2.75563	3.55362	5.38089	9.19158	17.0841	23.1217	30.5138	40.412	60.3118
0.178443	0.288141	0.412577	0.550282	0.688029	0.804874	0.984375	1.23047	1.46534	1.79159	2.20109	2.75586	3.57487	5.39701	9.20785	17.12	23.2764	30.5291	40.4587	60.5544
0.178445	0.288194	0.412713	0.550282	0.688983	0.806138	0.984375	1.23047	1.47656	1.79159	2.20366	2.76077	3.59843	5.39726	9.20825	17.1765	23.2874	30.53	40.4972	60.7273
0.178486	0.288949	0.412892	0.550282	0.691289	0.807789	0.984375	1.23047	1.47656	1.79335	2.20526	2.76312	3.61087	5.4035	9.22441	17.2231	23.2932	30.5315	40.546	60.8094
0.178531	0.289326	0.412905	0.550282	0.691962	0.809228	0.984375	1.23047	1.47732	1.79711	2.20626	2.76825	3.61162	5.41932	9.22915	17.2353	23.2934	30.5652	40.5505	60.8569
0.178565	0.289485	0.413626	0.550282	0.692351	0.809282	0.984375	1.23047	1.48129	1.79733	2.21484	2.77082	3.61162	5.44009	9.2537	17.2462	23.3326	30.6145	40.8829	61.0921
0.178595	0.289496	0.414426	0.550282	0.695423	0.81102	0.984375	1.23047	1.48267	1.79884	2.21653	2.77325	3.61162	5.4691	9.25804	17.3225	23.3374	30.6549	41.2273	61.402
0.17865	0.289663	0.414446	0.550282	0.696058	0.812839	0.984375	1.23047	1.48629	1.80492	2.2186	2.77325	3.61162	5.47881	9.33639	17.3301	23.3909	30.6614	41.2273	61.5868
0.178685	0.290001	0.415115	0.550282	0.696058	0.816336	0.984375	1.23047	1.48676	1.80567	2.22521	2.77325	3.61669	5.47953	9.3471	17.3377	23.4051	30.6857	41.5049	61.7751
0.178933	0.290587	0.41516	0.550282	0.696058	0.817142	0.984554	1.23047	1.48828	1.806	2.22871	2.77325	3.63304	5.48796	9.35836	17.3635	23.4462	30.7088	41.5491	61.7881
0.179034	0.291327	0.415488	0.550282	0.696058	0.819669	0.98633	1.23047	1.49177	1.80706	2.23259	2.77325	3.64583	5.50753	9.42904	17.3684	23.4942	30.7278	41.6306	61.9447
0.179073	0.291548	0.415684	0.550282	0.696058	0.819854	0.987674	1.23047	1.49309	1.80921	2.23659	2.77325	3.67195	5.52682	9.43127	17.3853	23.5283	30.86	41.651	62.0727
0.179089	0.291649	0.417684	0.550282	0.696058	0.820233	0.992188	1.23047	1.49354	1.80936	2.24231	2.77325	3.67716	5.53637	9.44214	17.3869	23.5647	30.8894	41.7041	62.3011
0.179383	0.292006	0.420045	0.550282	0.696058	0.822487	0.992188	1.23047	1.49381	1.80954	2.24616	2.77479	3.67943	5.55528	9.46742	17.4045	23.5921	30.9384	41.7156	62.5158
0.179617	0.292065	0.420331	0.550282	0.696058	0.823087	0.992188	1.23047	1.49468	1.81166	2.24863	2.77506	3.68008	5.55701	9.47986	17.459	23.6172	30.9702	41.7432	62.5201
0.17962	0.29223	0.422417	0.550282	0.696058	0.827642	0.993326	1.24023	1.49693	1.81393	2.2521	2.7797	3.6834	5.57523	9.56044	17.4858	23.6618	31.0003	41.7994	62.7104
0.17983	0.293238	0.422548	0.550282	0.696058	0.829061	0.996025	1.24023	1.49693	1.81784	2.25224	2.78493	3.68569	5.59095	9.58679	17.4862	23.7188	31.0452	41.8495	63.5153
0.180135	0.293743	0.42286	0.550282	0.696058	0.830885	1.00185	1.24023	1.49693	1.8201	2.25437	2.79452	3.68748	5.61235	9.59087	17.4943	23.7388	31.0488	41.8604	64.1051
0.181021	0.293863	0.422992	0.550282	0.696058	0.830958	1.00682	1.24023	1.49693	1.82189	2.25638	2.79787	3.68748	5.63103	9.6107	17.5353	23.7796	31.1168	41.9187	64.1449
0.18128	0.294202	0.424499	0.550282	0.696058	0.831813	1.00704	1.24023	1.49693	1.82361	2.25825	2.80096	3.69414	5.65706	9.62601	17.5402	24.0017	31.1254	41.9463	65.0177
0.18139	0.29502	0.425253	0.550282	0.696058	0.831899	1.00792	1.24023	1.49693	1.82521	2.25929	2.80298	3.7006	5.69636	9.65202	17.6314	24.1013	31.1606	42.0438	65.6264
0.181578	0.296314	0.425267	0.550282	0.696058	0.833048	1.01041	1.24023	1.49693	1.82623	2.26547	2.80384	3.70439	5.7081	9.70421	17.6451	24.1477	31.173	42.0663	65.6479
0.181702	0.296754	0.42547	0.550282	0.696058	0.834205	1.01096	1.24023	1.49693	1.82854	2.26665	2.8059	3.71556	5.71047	9.71062	17.7039	24.1973	31.1786	42.1372	65.8597
0.181744	0.297124	0.425536	0.550282	0.696058	0.834307	1.01136	1.24023	1.49693	1.82936	2.26887	2.8059	3.7207	5.72661	9.74345	17.7356	24.2123	31.1816	42.3795	66.0833
0.182073	0.297321	0.426672	0.550282	0.696058	0.834884	1.01467	1.24023	1.49693	1.83057	2.26887	2.80741	3.72113	5.74701	9.8539	17.8051	24.2607	31.2277	42.596	67.3385
0.182289	0.297484	0.427016	0.550282	0.696058	0.835464	1.01467	1.24531	1.49721	1.83104	2.26887	2.82346	3.75335	5.77424	9.92101	17.8265	24.3173	31.2306	42.6658	67.649
0.183165	0.297646	0.427247	0.550282	0.696058	0.837596	1.01467	1.24678	1.50166	1.83175	2.27095	2.82817	3.75363	5.81192	9.93908	17.8383	24.3182	31.2588	42.6706	68.7836
0.18323	0.297653	0.427255	0.550282	0.696058	0.839238	1.01467	1.25417	1.50392	1.83502	2.27459	2.82817	3.75363	5.81336	9.98334	17.9287	24.4008	31.3707	42.7051	68.9364
0.183369	0.297802	0.42758	0.550282	0.696058	0.840809	1.01467	1.25484	1.50694	1.83537	2.27498	2.82817	3.75363	5.82416	10.0245	17.9517	24.4241	31.3757	42.7903	70.3805
0.183378	0.299459	0.427948	0.550282	0.696058	0.841143	1.01467	1.25484	1.50882	1.83612	2.27889	2.84205	3.76451	5.83181	10.0752	18.0346	24.4348	31.4403	42.834	70.6092
0.183697	0.299653	0.428018	0.550282	0.696058	0.842934	1.01467	1.25484	1.51271	1.83623	2.28054	2.84854	3.77673	5.90526	10.0928	18.1099	24.4894	31.4404	42.855	71.6517
0.183843	0.299692	0.428926	0.550282	0.696058	0.843198	1.01467	1.25484	1.51574	1.83909	2.28312	2.84938	3.79439	5.90936	10.0971	18.1929	24.5255	31.4432	42.8975	72.4273
0.183985	0.299811	0.429225	0.550282	0.696058	0.844115	1.01467	1.25484	1.52268	1.84351	2.28688	2.85021	3.8204	5.92875	10.1316	18.3322	24.5583	31.4526	42.9021	72.6169
0.184239	0.299925	0.429387	0.550282	0.699327	0.844613	1.01467	1.25484	1.5243	1.84773	2.28688	2.86077	3.8204	5.93712	10.1467	18.3576	24.6228	31.5034	42.925	72.8559
0.184462	0.300102	0.429934	0.550282	0.699873	0.844751	1.01467	1.25484	1.52629	1.85126	2.28688	2.8679	3.8204	5.94633	10.1478	18.3983	24.6471	31.538	42.9406	73.6559
0.184673	0.300139	0.430406	0.550282	0.701077	0.850172	1.01467	1.25484	1.53079	1.85852	2.29147	2.87944	3.84411	6.06995	10.1567	18.4455	24.6536	31.5821	43.0638	74.0793
0.185405	0.300322	0.432967	0.550282	0.701366	0.852918	1.01467	1.25484	1.53229	1.86298	2.30173	2.88636	3.84917	6.07881	10.1705	18.4958	24.6582	31.6906	43.1416	74.0839
0.185766	0.300652	0.432979	0.550282	0.701583	0.854085	1.01467	1.25484	1.5326	1.86994	2.3062	2.90033	3.85072	6.10566	10.2159	18.5392	24.6628	31.7539	43.2577	74.4245
0.185809	0.300845	0.433142	0.550282	0.701583	0.85466	1.01467	1.25484	1.53301	1.87374	2.30805	2.90331	3.85714	6.10623	10.2233	18.5733	24.7135	31.7967	43.2662	75.2198
0.185876	0.301455	0.433725	0.550282	0.704329	0.858909	1.01467	1.25484	1.53366	1.87419	2.31108	2.90331	3.87919	6.13583	10.3058	18.7462	24.7315	31.803	43.3062	76.2247
0.1859	0.301793	0.435195	0.550282	0.704656	0.864105	1.01467	1.25484	1.53518	1.87466	2.31238	2.90331	3.88255	6.172	10.397	18.752	24.7338	31.8565	43.3249	76.2662
0.185969	0.302601	0.43548	0.550282	0.707161	0.865693	1.01467	1.25484	1.5356	1.8765	2.31643	2.90542	3.88255	6.20613	10.425	18.7686	24.8603	31.9131	43.3678	76.5298
0.186295	0.303195	0.435668	0.550282	0.709194	0.867222	1.01467	1.25522	1.54183	1.87873	2.31919	2.91437	3.8827	6.20617	10.443	18.7986	24.8625	31.9545	43.3905	77.018
0.186498	0.304166	0.435809	0.550282	0.70993	0.867767	1.01467	1.25647	1.54448	1.87953	2.32105	2.91674	3.90592	6.20922	10.509	18.8283	24.9088	32.0527	43.4242	77.6971
0.186923	0.304878	0.435964	0.550282	0.711114	0.867996	1.01467	1.26032	1.54564	1.88026	2.32326	2.92071	3.92197	6.27181	10.5131	18.8554	24.9983	32.1404	43.4414	78.49
0.187366	0.305563	0.437687	0.550282	0.711517	0.871186	1.01467	1.26222	1.54894	1.8806	2.32953	2.92217	3.92197	6.27418	10.5569	18.9279	25.0017	32.15	43.4907	78.6919
0.187547	0.305839	0.438109	0.550282	0.711954	0.873102	1.01611	1.26343	1.55277	1.88322	2.32987	2.9254	3.92197	6.28865	10.6155	18.9367	25.0129	32.2152	43.5215	79.3781
0.188145	0.306002	0.438113	0.550282	0.71223	0.875456	1.01772	1.26445	1.55335	1.88907	2.33073	2.9301	3.92626	6.30427	10.6775	18.9398	25.106	32.3167	43.5278	79.406
0.188195	0.306027	0.438416	0.550282	0.713851	0.877411	1.01849	1.2648	1.55458	1.88929	2.33215	2.93561	3.92738	6.33958	10.6977	19.061	25.185	32.3433	43.5674	79.813
0.18883	0.30644	0.439317	0.550282	0.714453	0.878804	1.01949	1.2648	1.55643	1.89023	2.33465	2.93873	3.92878	6.37799	10.7858	19.0655	25.2649	32.4131	43.5801	80.2655
0.189126	0.307032	0.440283	0.550282	0.716489	0.880333	1.01997	1.26748	1.55643	1.89344	2.33465	2.94048	3.96542	6.39373	10.7889	19.0916	25.2792	32.4475	43.5926	80.7963
0.189182	0.307111	0.440494	0.550282	0.717	0.886354	1.02167	1.27255	1.56193	1.89372	2.33483	2.9507	3.96814	6.39844	10.7909	19.093	25.3178	32.4701	43.6818	81.2749
0.189269	0.307178	0.440614	0.550282	0.718679	0.886513	1.0221	1.27259	1.56879	1.89412	2.33588	2.95231	3.98056	6.43658	10.8019	19.1235	25.3222	32.5206	43.6858	81.332
0.190443	0.307732	0.441048	0.550282	0.722159	0.887304	1.02246	1.27289	1.56879	1.89684	2.34007	2.95533	3.98189	6.49201	10.8717	19.1709	25.3369	32.5966	43.6929	82.4528
0.190478	0.30787	0.441969	0.550282	0.722446	0.887304	1.02272	1.27334	1.57284	1.89963	2.34007	2.96997	3.99098	6.52099	10.9364	19.2413	25.3771	32.6944	43.7815	82.8321
0.190609	0.30807	0.441973	0.550282	0.722502	0.887304	1.02436	1.27445	1.57322	1.90017	2.34007	2.9713	4.01491	6.57581	10.9401	19.3227	25.4138	32.6972	43.9708	83.2819
0.190824	0.308468	0.443171	0.550282	0.722507	0.887304	1.02436	1.27449	1.57337	1.90236	2.34467	2.97256	4.02644	6.58495	10.9523	19.3621	25.447	32.7855	44.0534	83.9337
0.191165	0.30849	0.444034	0.550282	0.72273	0.887304	1.02511	1.27475	1.57357	1.9025	2.34589	2.97282	4.03701	6.60992	10.9796	19.3826	25.4671	32.8302	44.0622	84.761
0.191191	0.308593	0.444252	0.550282	0.722766	0.887304	1.03078	1.27749	1.57577	1.90493	2.34924	2.98002	4.053	6.62439	11.0479	19.4059	25.4692	32.8341	44.0909	84.9498
0.191372	0.308705	0.44473	0.550282	0.726029	0.887304	1.03104	1.279	1.57577	1.90648	2.35181	2.98487	4.05868	6.66274	11.0551	19.4667	25.4956	32.8344	44.24	85.2615
0.191559	0.308953	0.444921	0.550282	0.727359	0.887304	1.03354	1.28115	1.57577	1.90952	2.35708	2.99617	4.07181	6.67262	11.0857	19.5391	25.5168	32.8406	44.3479	85.5132
0.191587	0.309523	0.445117	0.550282	0.728201	0.887304	1.0352	1.28476	1.57577	1.91079	2.35731	2.99716	4.07773	6.71561	11.093	19.5672	25.5668	32.9258	44.3777	86.0526
0.191662	0.309896	0.445241	0.550282	0.729105	0.887304	1.03978	1.29128	1.57658	1.91131	2.35817	2.99716	4.08144	6.72156	11.1043	19.6421	25.5864	32.9342	44.4095	86.2019
0.192045	0.310476	0.445744	0.550282	0.729611	0.887304	1.04409	1.2916	1.5769	1.91225	2.35836	2.9988	4.09089	6.72255	11.1614	19.6472	25.6462	33.02	44.4835	86.8749
0.192135	0.310548	0.44581	0.550282	0.729712	0.887304	1.04409	1.293	1.58141	1.91369	2.36095	2.9994	4.09089	6.72467	11.2287	19.6802	25.6698	33.1433	44.4897	88.493
0.192136	0.310639	0.445919	0.550282	0.732848	0.887304	1.04409	1.2943	1.58334	1.91644	2.37733	3.00525	4.14493	6.73869	11.2908	19.7093	25.6872	33.2072	44.6034	92.971
0.19249	0.311239	0.446613	0.550917	0.733252	0.887304	1.04409	1.29597	1.58421	1.92687	2.38732	3.01762	4.1454	6.7476	11.3075	19.7673	25.7399	33.2121	44.8169
0.19258	0.31188	0.447317	0.551787	0.733368	0.887304	1.04528	1.29654	1.58439	1.92826	2.3874	3.01762	4.16685	6.7476	11.3525	19.7674	25.8124	33.2355	44.9675
0.192615	0.312027	0.449486	0.553047	0.733604	0.887304	1.0466	1.3012	1.58699	1.93022	2.38852	3.0207	4.17622	6.75545	11.3547	19.7698	25.8555	33.2693	44.9836
0.19307	0.31218	0.452567	0.55465	0.733688	0.887304	1.04983	1.30246	1.58827	1.93111	2.39778	3.0278	4.18631	6.7601	11.3605	19.8377	25.882	33.2841	45.0306
0.193147	0.312499	0.453727	0.55465	0.737213	0.887304	1.05148	1.30473	1.58827	1.93171	2.40301	3.03732	4.20248	6.77036	11.363	19.8513	25.9618	33.291	45.04
0.193559	0.313202	0.453908	0.55465	0.738261	0.887304	1.05237	1.30715	1.58828	1.93266	2.41315	3.04401	4.20525	6.85538	11.4277	19.8839	25.9706	33.5447	45.2768
0.193634	0.31336	0.454301	0.55465	0.738281	0.887304	1.0532	1.31066	1.58929	1.9327	2.41642	3.04401	4.20525	6.8824	11.4325	19.9397	25.9731	33.5684	45.3487
0.193766	0.313609	0.456486	0.55465	0.738281	0.887304	1.05322	1.31135	1.59004	1.93731	2.41653	3.05764	4.21161	6.89567	11.4612	19.9474	25.9822	33.5707	45.3878
0.193973	0.313988	0.457663	0.55465	0.738281	0.887304	1.05657	1.31221	1.59216	1.93731	2.41674	3.06166	4.2168	6.89857	11.473	19.9882	25.9834	33.5822	45.4179
0.194143	0.314587	0.457712	0.55465	0.738281	0.887304	1.05674	1.3129	1.59376	1.94225	2.41976	3.06817	4.2291	6.92847	11.4915	20.0202	26.0378	33.633	45.6779
0.194181	0.314606	0.457887	0.55465	0.738281	0.887304	1.05832	1.31464	1.60025	1.94664	2.42452	3.06836	4.24233	6.94522	11.5247	20.0859	26.0827	33.644	45.782
0.194669	0.314698	0.458369	0.55465	0.738281	0.887304	1.0614	1.31798	1.60058	1.95007	2.43047	3.07563	4.29407	6.94974	11.569	20.1056	26.1337	33.7289	45.8348
0.194901	0.315624	0.458399	0.55465	0.738281	0.887569	1.06471	1.32111	1.6041	1.95079	2.43992	3.08065	4.29522	7.03665	11.5855	20.114	26.1716	33.7433	45.8613
0.194925	0.316488	0.458431	0.55465	0.738281	0.888678	1.07161	1.32317	1.60448	1.95268	2.44298	3.09421	4.29708	7.04678	11.6246	20.175	26.2677	33.7536	45.8821
0.195127	0.317009	0.45997	0.55465	0.738281	0.889138	1.07476	1.32348	1.60645	1.95386	2.44508	3.09854	4.29784	7.10137	11.6438	20.1797	26.2723	33.7847	46.0089
0.195191	0.317345	0.460203	0.55465	0.738281	0.889408	1.07919	1.32355	1.60759	1.95464	2.44727	3.09979	4.32344	7.10731	11.6608	20.207	26.287	33.8121	46.0295
0.195317	0.317527	0.460427	0.55465	0.738281	0.890381	1.08131	1.32526	1.60766	1.9556	2.45289	3.10908	4.33195	7.12096	11.6685	20.2229	26.3079	33.9065	46.1242
0.195447	0.317663	0.461302	0.555108	0.738281	0.891906	1.08266	1.32526	1.60773	1.96072	2.45554	3.11017	4.33195	7.12554	11.7609	20.229	26.3251	33.9645	46.1324
0.195725	0.317757	0.461701	0.555213	0.738281	0.893367	1.0828	1.32526	1.60918	1.96096	2.45728	3.11039	4.33235	7.14636	11.7952	20.2588	26.3458	34.0331	46.1819
0.195807	0.3179	0.462936	0.555809	0.738281	0.894153	1.08437	1.32526	1.60978	1.96476	2.4578	3.11287	4.35116	7.15769	11.9215	20.2706	26.3677	34.0408	46.186
0.195956	0.318059	0.464294	0.556322	0.738281	0.894346	1.08724	1.32633	1.61131	1.96546	2.45906	3.11793	4.35461	7.20021	11.9374	20.3897	26.4051	34.0615	46.295
0.196209	0.318667	0.464543	0.558457	0.738281	0.894346	1.08902	1.32891	1.61561	1.96631	2.46058	3.12445	4.35641	7.204	12.0987	20.4104	26.4333	34.075	46.3688
0.19682	0.318798	0.46493	0.559356	0.738281	0.894346	1.09123	1.32959	1.61582	1.96875	2.46434	3.12813	4.4006	7.22507	12.1884	20.4722	26.4452	34.1297	46.3874
0.197016	0.318825	0.464942	0.559578	0.738281	0.894965	1.09764	1.33031	1.61685	1.97005	2.46556	3.12898	4.44342	7.23834	12.2383	20.5151	26.4664	34.1707	46.4729
0.197243	0.318939	0.465311	0.560389	0.738281	0.898527	1.09842	1.33577	1.62134	1.97596	2.46755	3.13757	4.44452	7.23876	12.2977	20.5295	26.5063	34.175	46.5416
0.197276	0.318975	0.465853	0.560542	0.738281	0.89915	1.09995	1.33577	1.62278	1.97677	2.46971	3.13757	4.44789	7.26706	12.3047	20.5309	26.8528	34.2225	46.5759
0.197281	0.31914	0.466038	0.560625	0.738281	0.899301	1.10056	1.33577	1.62295	1.97922	2.47051	3.13757	4.45229	7.28245	12.3145	20.5319	26.9288	34.3039	46.5877
0.197324	0.319389	0.466398	0.561578	0.738281	0.900976	1.10056	1.33591	1.62373	1.98323	2.48047	3.13757	4.45314	7.31633	12.351	20.5459	26.9585	34.3372	47.0702
0.198016	0.319391	0.466598	0.561919	0.738281	0.901452	1.10056	1.338	1.62699	1.98407	2.48047	3.14308	4.46002	7.32529	12.3702	20.5738	26.9904	34.3874	47.1455
0.198036	0.319523	0.466612	0.563607	0.738281	0.902048	1.10056	1.33816	1.62711	1.98407	2.48714	3.16336	4.52438	7.34168	12.4149	20.6007	27.0342	34.4467	47.2312
0.198047	0.319844	0.467757	0.56498	0.738281	0.905721	1.10056	1.33978	1.62956	1.98407	2.4873	3.16672	4.53067	7.36534	12.415	20.7309	27.0499	34.5076	47.2443
0.198049	0.320047	0.467802	0.565623	0.738281	0.90688	1.10056	1.34308	1.63172	1.98438	2.48879	3.1694	4.53596	7.45406	12.4246	20.7329	27.1429	34.532	47.332
0.19808	0.320057	0.468269	0.565843	0.738281	0.908002	1.10056	1.34491	1.63283	1.98578	2.49092	3.17099	4.57376	7.4593	12.5004	20.7494	27.1563	34.6217	47.4968
0.198761	0.321021	0.469345	0.566318	0.738281	0.909256	1.10056	1.35113	1.63289	1.98607	2.49191	3.17478	4.59534	7.47056	12.5006	20.8695	27.2761	34.6335	47.5479
0.198878	0.321156	0.469366	0.566663	0.738281	0.909316	1.10056	1.3516	1.63396	1.98608	2.49284	3.18314	4.61394	7.47615	12.5943	20.899	27.3942	34.6538	47.843
0.198881	0.321318	0.469789	0.566767	0.738281	0.910084	1.10056	1.3584	1.63685	1.99519	2.49284	3.1889	4.6155	7.50369	12.6698	20.9888	27.3961	34.6884	48.1064
0.19912	0.321648	0.470367	0.567625	0.738281	0.912938	1.10084	1.35887	1.63898	1.99542	2.50066	3.18931	4.62665	7.54303	12.6723	20.9974	27.4033	34.7061	48.1502
0.199142	0.322028	0.470812	0.568316	0.738281	0.916226	1.10393	1.3602	1.6401	1.99851	2.50967	3.18969	4.6339	7.5497	12.6772	21.0195	27.4078	34.7132	48.1801
0.200453	0.3222	0.471178	0.568854	0.738281	0.916868	1.1093	1.36318	1.64137	1.99996	2.50967	3.19922	4.64244	7.56839	12.731	21.1362	27.4347	34.8067	48.2888
0.200691	0.3226	0.471699	0.57005	0.738281	0.91692	1.1093	1.36411	1.64378	2.00029	2.50967	3.20102	4.65025	7.57254	12.7549	21.1931	27.4401	34.8118	48.42
0.2007	0.323202	0.47233	0.570531	0.738281	0.918275	1.11293	1.3669	1.64739	2.00353	2.5106	3.20162	4.66017	7.57646	12.7719	21.2512	27.4489	34.8247	48.428
0.200963	0.323452	0.475287	0.571842	0.738281	0.91861	1.11299	1.3701	1.64774	2.00449	2.521	3.22461	4.68014	7.63287	12.829	21.2608	27.4537	34.834	48.5494
0.201269	0.324347	0.476107	0.571848	0.738281	0.919765	1.11319	1.37241	1.65085	2.00821	2.52316	3.22461	4.6978	7.69215	12.8394	21.3569	27.4655	34.874	48.5967
0.201316	0.324957	0.476204	0.571907	0.738281	0.923055	1.11788	1.37275	1.65085	2.00892	2.5275	3.22461	4.72715	7.70395	12.8619	21.3569	27.5187	34.9016	48.6324
0.201418	0.32642	0.476345	0.572577	0.738281	0.923554	1.11832	1.37525	1.65087	2.01165	2.52959	3.22461	4.74238	7.71633	12.8681	21.3869	27.5647	34.9253	48.7594
0.201718	0.326643	0.477408	0.572817	0.739358	0.924553	1.11879	1.37583	1.65435	2.01203	2.52959	3.22461	4.76434	7.81524	12.8721	21.4411	27.5893	34.9768	48.8911
0.201846	0.326683	0.47779	0.574209	0.741358	0.925129	1.12002	1.3763	1.65573	2.01417	2.5353	3.22461	4.77828	7.82271	12.8735	21.4429	27.6004	35.0069	49.0638
0.201947	0.32752	0.478045	0.574743	0.741929	0.930054	1.1207	1.38055	1.65584	2.01617	2.55377	3.22791	4.84333	7.91032	12.8956	21.4862	27.655	35.0092	49.1795
0.202399	0.327641	0.478634	0.574875	0.742433	0.93198	1.12094	1.38489	1.65633	2.02181	2.5538	3.23026	4.84839	7.91103	12.9123	21.5272	27.668	35.011	49.2085
0.202674	0.327697	0.482228	0.574919	0.743543	0.934607	1.12428	1.38512	1.65636	2.02934	2.5538	3.23414	4.85373	7.94195	13.125	21.53	27.6888	35.033	49.2228
0.202736	0.328703	0.482611	0.577464	0.744141	0.938793	1.12812	1.38856	1.65717	2.02934	2.55625	3.23583	4.85519	7.95915	13.1466	21.5461	27.6903	35.0338	49.4425
0.20298	0.329513	0.483372	0.578473	0.744141	0.939684	1.12867	1.38898	1.65742	2.02934	2.56028	3.24924	4.87996	7.97262	13.1907	21.5967	27.728	35.1604	49.6108
0.203148	0.329638	0.483949	0.579754	0.744141	0.941122	1.13167	1.39183	1.65847	2.02972	2.57593	3.26255	4.88955	7.97364	13.2334	21.6744	27.7366	35.1747	49.8704
0.203161	0.329992	0.484249	0.580912	0.744141	0.941526	1.13274	1.39212	1.66395	2.03036	2.58969	3.26255	4.93526	7.99049	13.26	21.6757	27.7466	35.1838	49.9219
0.203242	0.330167	0.484521	0.58175	0.744141	0.941665	1.13641	1.39212	1.66594	2.03574	2.58969	3.26432	4.9423	7.99606	13.2731	21.7178	27.7772	35.2315	49.9288
0.203338	0.330331	0.486252	0.581977	0.744141	0.941993	1.13701	1.39212	1.66681	2.0379	2.58969	3.26722	4.94617	8.02726	13.4152	21.7914	27.8126	35.2861	49.9431
0.203394	0.331128	0.486603	0.582496	0.744141	0.943481	1.13737	1.39226	1.66695	2.03831	2.59444	3.28059	4.94642	8.03488	13.4305	21.8382	27.8739	35.3528	50.0595
0.203412	0.33123	0.487538	0.583162	0.744141	0.947107	1.13863	1.39246	1.66834	2.03863	2.59572	3.2833	4.95781	8.04016	13.5066	21.8537	27.8773	35.4003	50.1895
0.203472	0.331393	0.488072	0.583828	0.744141	0.947466	1.1387	1.39498	1.66938	2.04545	2.60181	3.28393	4.97269	8.05552	13.532	22.0172	27.9439	35.5266	50.3043
0.203581	0.332013	0.488445	0.584013	0.744141	0.94895	1.14014	1.39787	1.66948	2.04545	2.60747	3.28793	4.98568	8.0994	13.6415	22.0199	27.9829	35.5535	50.4908
0.203841	0.332236	0.489906	0.584953	0.744141	0.950791	1.14044	1.39997	1.67391	2.04545	2.61207	3.29002	5.01935	8.19684	13.7167	22.0388	28.0115	35.5605	50.5568
0.203947	0.332267	0.490134	0.585543	0.746008	0.953666	1.14152	1.40023	1.67677	2.05207	2.62012	3.29208	5.01947	8.22513	13.7571	22.0411	28.0484	35.5691	50.5957
0.204755	0.33308	0.490235	0.586416	0.747139	0.955346	1.14684	1.40062	1.68232	2.0553	2.62035	3.30927	5.03827	8.25424	13.7759	22.0646	28.0883	35.6526	50.6076
0.205014	0.333321	0.492188	0.586731	0.748253	0.957939	1.14771	1.40084	1.68371	2.0555	2.62039	3.31943	5.06738	8.25893	13.801	22.0996	28.197	35.7187	50.7707
0.205877	0.333518	0.492188	0.587876	0.748361	0.959065	1.15046	1.40122	1.68483	2.05778	2.62165	3.32068	5.09236	8.3314	13.8576	22.1178	28.2143	35.9781	50.9694
0.206218	0.334634	0.492188	0.588463	0.748837	0.962087	1.15485	1.40184	1.68539	2.06448	2.62295	3.33829	5.09908	8.33745	13.8683	22.1272	28.2305	35.9886	50.9869
0.206613	0.335355	0.492188	0.589581	0.751311	0.969	1.15742	1.40751	1.68618	2.0651	2.62934	3.3503	5.10394	8.34644	13.9701	22.1819	28.24	36.0047	51.1912
0.207034	0.33604	0.492188	0.589823	0.751711	0.969691	1.15838	1.41015	1.68694	2.06513	2.63497	3.36077	5.12157	8.35503	14.0941	22.1865	28.2452	36.0523	51.2927
0.207078	0.336829	0.492188	0.589862	0.751999	0.97111	1.16639	1.41143	1.68774	2.06978	2.63514	3.36241	5.12208	8.37081	14.1652	22.2045	28.3121	36.1391	51.3217
0.207324	0.336908	0.492188	0.590653	0.753159	0.971746	1.17055	1.41175	1.69041	2.07096	2.6361	3.3738	5.16686	8.38765	14.1734	22.2679	28.4119	36.166	51.3659
0.207398	0.337926	0.492188	0.590954	0.753207	0.972458	1.17426	1.41778	1.69143	2.07534	2.63677	3.3738	5.17382	8.38805	14.2038	22.3356	28.5545	36.1814	51.5174
0.207573	0.338304	0.492188	0.591444	0.753471	0.972533	1.17626	1.41814	1.69636	2.08519	2.64322	3.40995	5.1744	8.39326	14.3338	22.3676	28.5545	36.2226	51.5733
0.207988	0.338847	0.492188	0.592132	0.755348	0.974494	1.18031	1.41927	1.6995	2.09108	2.66076	3.41268	5.18491	8.40816	14.427	22.3722	28.5783	36.2955	51.5752
0.208136	0.338944	0.492188	0.592245	0.756019	0.975422	1.18229	1.4259	1.70197	2.09587	2.66163	3.42769	5.19207	8.43359	14.4923	22.3842	28.6262	36.4393	51.5854
0.20862	0.339275	0.492188	0.592451	0.75809	0.978344	1.18234	1.42674	1.70404	2.09594	2.66191	3.4503	5.21109	8.43359	14.5166	22.4109	28.6401	36.6205	51.739
0.208695	0.339402	0.492188	0.594666	0.75866	0.979192	1.18418	1.43277	1.70404	2.10229	2.66615	3.45489	5.23177	8.47506	14.5233	22.4206	28.6937	36.8022	51.8361
0.208852	0.339635	0.492188	0.59584	0.75873	0.979959	1.18562	1.43496	1.70414	2.10425	2.67064	3.45489	5.24856	8.49235	14.7018	22.5171	28.7344	36.8549	51.9019
0.209244	0.340088	0.492188	0.596763	0.758746	0.981047	1.18622	1.43496	1.70545	2.10475	2.67103	3.45489	5.26187	8.51935	14.7065	22.5272	28.7426	36.9427	52.3684
0.209254	0.340153	0.492188	0.59744	0.760383	0.981121	1.18685	1.43496	1.70707	2.10535	2.67155	3.45489	5.26891	8.5265	14.7122	22.5957	28.8664	37.0024	52.5041
0.209728	0.340958	0.492188	0.598108	0.76134	0.981439	1.18871	1.43496	1.70986	2.11882	2.67491	3.45489	5.27318	8.52781	14.7604	22.6322	28.9388	37.0249	52.8529
0.20981	0.340997	0.492188	0.598273	0.76227	0.98273	1.19027	1.43496	1.70996	2.12081	2.6847	3.46989	5.28595	8.64215	14.7923	22.7048	29.0384	37.0306	52.9011
0.209953	0.341832	0.492188	0.599735	0.762889	0.984375	1.19496	1.43496	1.71035	2.12454	2.69211	3.47266	5.29166	8.66935	14.8066	22.7474	29.0575	37.1518	52.9033
0.210026	0.341959	0.492188	0.60233	0.76613	0.984375	1.19736	1.43496	1.71187	2.12778	2.69616	3.48029	5.29268	8.67544	14.8595	22.8041	29.1032	37.4664	52.9056
0.210354	0.342475	0.492188	0.603273	0.766315	0.984375	1.19745	1.43496	1.7145	2.12965	2.69676	3.4815	5.29466	8.72278	14.8751	22.8057	29.1066	37.6725	52.9274
0.210619	0.342771	0.492188	0.603432	0.766589	0.984375	1.20008	1.43496	1.71506	2.13378	2.6974	3.48793	5.34145	8.76711	15.0058	22.8737	29.1213	37.7039	53.0264
0.210858	0.342775	0.492188	0.60579	0.76684	0.984375	1.20056	1.43496	1.71639	2.13741	2.70125	3.48849	5.36252	8.8086	15.0459	22.8823	29.1234	37.7292	53.1614
0.211119	0.343931	0.492188	0.60585	0.768123	0.984375	1.20175	1.43496	1.71849	2.13861	2.70449	3.50791	5.3762	8.83144	15.0647	22.9775	29.165	37.7521	53.39
0.21132	0.344797	0.492188	0.606033	0.768539	0.984375	1.2032	1.43496	1.7186	2.14474	2.70647	3.50791	5.3861	8.83706	15.1643	22.9984	29.1877	37.77	53.6974
0.211523	0.345053	0.492188	0.606292	0.769135	0.984375	1.20912	1.43509	1.72266	2.14597	2.7241	3.50791	5.38655	8.85159	15.1946	23.0117	29.2445	37.8492	53.7059
0.212239	0.345609	0.492188	0.607611	0.769187	0.984375	1.21718	1.44063	1.72336	2.149	2.72435	3.52846	5.38922	8.92462	15.2158	23.0424	29.2449	37.8732	53.7305
0.212326	0.346612	0.492188	0.608063	0.769384	0.984375	1.21818	1.44416	1.72633	2.1516	2.72508	3.53395	5.39452	8.93439	15.222	23.0519	29.2477	37.8953	53.737
0.212377	0.346761	0.492188	0.61019	0.770859	0.984375	1.22068	1.44418	1.72964	2.1534	2.72785	3.53865	5.39726	8.94931	15.2241	23.0749	29.2539	37.9252	53.8779
0.213159	0.346877	0.492188	0.611936	0.770951	0.984432	1.22354	1.44547	1.73117	2.16046	2.73413	3.55149	5.40286	8.94953	15.2292	23.0815	29.272	38.0153	53.8856
0.213176	0.347235	0.492188	0.612586	0.771963	0.984602	1.22362	1.4455	1.73125	2.16071	2.73441	3.58219	5.40286	8.97478	15.2419	23.1131	29.2802	38.4313	54.0567
0.213181	0.348029	0.492188	0.61311	0.772109	0.984819	1.2283	1.44552	1.73247	2.1632	2.73781	3.58799	5.40867	9.02904	15.2972	23.1549	29.3457	38.5631	54.1498
0.213554	0.348029	0.492188	0.613598	0.7722	0.985305	1.22833	1.44635	1.73633	2.16442	2.74313	3.61162	5.41167	9.03946	15.3338	23.1601	29.3608	38.5719	54.3946
0.214052	0.348029	0.492188	0.614498	0.773944	0.989649	1.22878	1.44635	1.73895	2.16985	2.75395	3.61162	5.41251	9.08489	15.3655	23.1956	29.4364	38.6006	54.537
0.214119	0.348029	0.492188	0.614649	0.775501	0.990282	1.22961	1.44635	1.73903	2.1731	2.75559	3.61162	5.43928	9.08563	15.4039	23.2141	29.4365	38.8508	54.5372
0.21454	0.348029	0.492188	0.615274	0.775764	0.990554	1.23047	1.44728	1.74015	2.17484	2.76087	3.63353	5.45393	9.10879	15.4337	23.2258	29.4525	38.9305	54.8677
0.214848	0.348029	0.492188	0.61606	0.778217	0.992188	1.23047	1.44837	1.74015	2.17608	2.76354	3.63532	5.45703	9.10987	15.5896	23.2611	29.4861	38.9552	54.9251
0.214908	0.348029	0.492188	0.617414	0.778217	0.992188	1.23047	1.44912	1.74015	2.17763	2.76439	3.65133	5.45758	9.16938	15.6073	23.3208	29.4999	38.9868	55.0427
0.215854	0.348029	0.492188	0.617606	0.778217	0.992188	1.23047	1.44963	1.74015	2.18631	2.76617	3.66237	5.49098	9.1867	15.7395	23.3441	29.5124	39.1099	55.0718
0.215882	0.348029	0.492188	0.617907	0.778217	0.992578	1.23047	1.45055	1.74015	2.18915	2.76921	3.68748	5.50343	9.20043	15.8194	23.36	29.5374	39.1343	55.0873
0.216042	0.348029	0.492188	0.617928	0.778217	0.994231	1.23047	1.45111	1.74073	2.18925	2.77325	3.68815	5.5096	9.20785	15.8284	23.3721	29.5557	39.1963	55.2248
0.216179	0.348029	0.492188	0.619867	0.778217	0.995675	1.23047	1.45139	1.74107	2.19755	2.77325	3.69485	5.56856	9.28773	15.8913	23.3996	29.5717	39.2513	55.6073
0.216195	0.348029	0.492188	0.621004	0.778217	0.999275	1.23047	1.45335	1.74235	2.20333	2.77325	3.70461	5.6063	9.29776	15.8995	23.41	29.5825	39.3238	55.7754
0.216642	0.348029	0.492188	0.622231	0.778217	1.00145	1.23047	1.45474	1.74317	2.2039	2.77325	3.73349	5.61233	9.33952	15.955	23.4851	29.6152	39.3792	55.7851
0.216912	0.348029	0.492188	0.62358	0.778217	1.00192	1.23047	1.455	1.74437	2.22027	2.77325	3.75497	5.62258	9.384	16.0245	23.5172	29.6282	39.3957	56.3206
0.217163	0.348029	0.492188	0.623704	0.778217	1.00283	1.23047	1.45511	1.74632	2.22844	2.77325	3.76644	5.67285	9.38403	16.0789	23.5449	29.6643	39.6021	56.3424
0.217571	0.348029	0.492188	0.62409	0.778217	1.00454	1.23047	1.45902	1.75396	2.22847	2.77325	3.76679	5.7081	9.40934	16.0812	23.5955	29.7008	39.6119	56.4993
0.21767	0.348029	0.492188	0.624127	0.778217	1.00476	1.23047	1.46015	1.75832	2.22997	2.77325	3.76881	5.71203	9.41974	16.215	23.5994	29.7313	39.687	56.7298
0.217937	0.348029	0.492188	0.62444	0.778217	1.00612	1.23084	1.46223	1.75936	2.23141	2.77325	3.77814	5.72661	9.42032	16.2664	23.6007	29.7367	39.802	56.733
0.218032	0.348029	0.492188	0.625935	0.778217	1.00639	1.23314	1.46294	1.75966	2.23866	2.77325	3.81529	5.73804	9.43074	16.3703	23.6069	29.7403	39.8623	56.7527
0.21808	0.348029	0.492188	0.626897	0.778217	1.01026	1.23421	1.463	1.76197	2.2411	2.77613	3.82082	5.76834	9.44404	16.3859	23.6114	29.7731	39.9386	56.9347
0.218513	0.348029	0.492188	0.630182	0.778217	1.01079	1.23439	1.46398	1.76613	2.24171	2.77982	3.82524	5.81192	9.48463	16.4116	23.6233	29.8162	39.9479	57.1014
0.218683	0.348029	0.492188	0.630788	0.778217	1.01161	1.23648	1.46537	1.76721	2.24244	2.78547	3.82832	5.85267	9.48528	16.4423	23.635	29.8176	39.9839	57.1102
0.218715	0.348029	0.492188	0.631475	0.778217	1.0117	1.2374	1.46606	1.77074	2.24616	2.80178	3.83373	5.85412	9.50471	16.4449	23.6365	29.8424	40.0078	57.3418
0.218839	0.348029	0.492188	0.631615	0.778217	1.01283	1.23792	1.46607	1.77461	2.2471	2.80432	3.8444	5.85457	9.52744	16.5543	23.6791	29.8525	40.1152	57.4747
0.219306	0.348029	0.492188	0.633772	0.778217	1.01285	1.2396	1.46667	1.77461	2.24983	2.8059	3.84593	5.86562	9.53329	16.6295	23.6843	29.8575	40.1844	57.5581
0.219367	0.348029	0.492188	0.63424	0.778217	1.01467	1.24023	1.46714	1.7747	2.25063	2.80763	3.85072	5.88525	9.5457	16.6532	23.6868	29.8744	40.2333	57.6457
0.219418	0.348029	0.492188	0.635448	0.778217	1.01467	1.24023	1.46935	1.77473	2.25842	2.81261	3.85072	5.94712	9.55655	16.6654	23.7194	30.0244	40.4232	57.8715
0.219867	0.348029	0.492188	0.636613	0.778217	1.01467	1.24023	1.46936	1.7766	2.26887	2.81478	3.87184	5.97372	9.5694	16.722	23.7237	30.0531	40.445	58.0663
0.220435	0.348029	0.492188	0.637858	0.778217	1.01467	1.24023	1.47374	1.77715	2.26887	2.82247	3.87335	5.99188	9.66456	16.756	23.7255	30.103	40.4845	58.1271
0.22055	0.348029	0.492188	0.638917	0.778217	1.01467	1.24023	1.4751	1.77802	2.26887	2.82817	3.89643	6.00152	9.74482	16.7599	23.7517	30.1119	40.4935	58.2251
0.220675	0.348029	0.492188	0.639487	0.778217	1.01467	1.24379	1.47656	1.78694	2.26887	2.82817	3.9145	6.00695	9.74562	16.8648	23.7922	30.1653	40.5448	58.4049
0.220754	0.348029	0.492188	0.640792	0.778217	1.01467	1.2442	1.47656	1.78869	2.27403	2.82817	3.92197	6.0125	9.7845	16.8931	23.948	30.1682	40.5866	58.4386
0.221027	0.348029	0.492188	0.641166	0.778217	1.01467	1.24475	1.47717	1.79159	2.28224	2.83162	3.92197	6.02645	9.80222	16.911	24.0311	30.1989	40.6033	58.8018
0.221119	0.348029	0.492188	0.641629	0.778217	1.01467	1.24563	1.47775	1.79588	2.28482	2.83684	3.92197	6.08243	9.82882	16.942	24.0367	30.199	40.63	58.9907
0.221174	0.348029	0.492373	0.642385	0.778217	1.01467	1.2464	1.47787	1.79802	2.28504	2.84056	3.92353	6.08733	9.95857	16.9915	24.103	30.2177	40.7884	59.3904
0.221617	0.348029	0.49258	0.64322	0.778217	1.01467	1.2504	1.47904	1.79979	2.28576	2.85725	3.92389	6.1096	9.97211	17.0374	24.1277	30.2485	40.7943	59.4801
0.221683	0.348029	0.492608	0.643518	0.778217	1.01467	1.25042	1.48335	1.80006	2.28688	2.87454	3.93013	6.11007	10.0263	17.0787	24.1474	30.3065	40.9372	59.4801
0.221692	0.348029	0.493248	0.643859	0.778217	1.01467	1.25081	1.48345	1.80032	2.28688	2.87527	3.9761	6.21234	10.0558	17.119	24.1489	30.3084	40.9465	59.4806
0.221788	0.348029	0.493971	0.644852	0.779753	1.01467	1.25134	1.48394	1.80232	2.28712	2.8781	3.99091	6.23949	10.2152	17.2152	24.1519	30.3237	40.96	59.7726
0.221914	0.348029	0.494048	0.645113	0.78065	1.01467	1.25303	1.48419	1.80484	2.28718	2.87834	3.99637	6.2434	10.2163	17.2494	24.2237	30.3267	40.96	60.0811
0.222301	0.348029	0.494367	0.647087	0.780788	1.01467	1.25367	1.48461	1.80576	2.2888	2.89108	3.9988	6.24566	10.2774	17.2496	24.2973	30.5289	41.109	60.3494
0.222464	0.348029	0.494393	0.647422	0.781148	1.01467	1.25388	1.4848	1.80581	2.29201	2.90331	4.00612	6.28139	10.3171	17.2618	24.3247	30.5573	41.1356	60.418
0.222466	0.348029	0.496004	0.648089	0.782157	1.01467	1.25402	1.48557	1.80581	2.30884	2.90331	4.00612	6.28753	10.3355	17.3006	24.3825	30.6235	41.1827	60.6985
0.222722	0.348029	0.496094	0.648279	0.782974	1.01467	1.25475	1.48793	1.80832	2.3091	2.90806	4.00612	6.30308	10.3389	17.3225	24.4709	30.6657	41.3435	60.7934
0.223103	0.348029	0.496094	0.649388	0.783968	1.01467	1.25484	1.48799	1.81183	2.31243	2.91047	4.00732	6.36413	10.34	17.3582	24.4959	30.6977	41.3661	61.195
0.223562	0.348029	0.496094	0.649891	0.784393	1.01467	1.25484	1.48927	1.81438	2.31894	2.92155	4.02718	6.39844	10.3815	17.3842	24.5128	30.7157	41.4567	61.7283
0.223711	0.348029	0.496094	0.650325	0.784393	1.01467	1.25484	1.49047	1.81973	2.32011	2.92766	4.03624	6.44629	10.3873	17.3853	24.5767	30.7358	41.4584	61.9028
0.223727	0.348029	0.496094	0.651566	0.784393	1.01467	1.25484	1.49599	1.82186	2.32129	2.92985	4.05298	6.45079	10.422	17.3897	24.5921	30.7478	41.5987	61.9387
0.22373	0.348029	0.496094	0.651664	0.784393	1.01467	1.25484	1.49601	1.82287	2.32417	2.9335	4.05675	6.4868	10.5131	17.4049	24.6191	30.756	41.6039	61.9879
0.224345	0.348029	0.496094	0.654129	0.784411	1.01467	1.25484	1.49654	1.82295	2.32489	2.93577	4.05868	6.49201	10.5237	17.4734	24.644	30.7998	41.6586	62.2603
0.224854	0.348029	0.496094	0.654496	0.784786	1.01467	1.25484	1.49693	1.82552	2.32543	2.93621	4.07536	6.50095	10.5522	17.4853	24.6454	30.8218	41.6911	62.4302
0.22539	0.348029	0.496094	0.65598	0.785337	1.01467	1.25484	1.49693	1.82594	2.32613	2.93829	4.08483	6.55768	10.5842	17.4912	24.6895	30.8326	41.6981	62.5738
0.22591	0.348029	0.496094	0.656448	0.785981	1.01467	1.25484	1.49693	1.84255	2.32681	2.96187	4.10513	6.56034	10.5994	17.534	24.6978	30.9174	41.7212	62.63
0.22671	0.348029	0.496094	0.657226	0.786233	1.01566	1.25484	1.5048	1.85146	2.32994	2.96217	4.10591	6.56819	10.6022	17.5531	24.709	30.9264	41.722	62.8561
0.226848	0.348029	0.496094	0.657729	0.786237	1.01886	1.25484	1.50564	1.85826	2.33239	2.96466	4.10815	6.61872	10.6775	17.6108	24.7505	30.9893	41.7316	63.1019
0.22702	0.348029	0.496094	0.66076	0.786734	1.01917	1.25484	1.50641	1.86443	2.33859	2.97649	4.11243	6.63311	10.683	17.6516	24.759	31.0541	41.7485	63.8611
0.227129	0.348029	0.496094	0.662254	0.787339	1.01942	1.25484	1.50881	1.87027	2.33878	2.97712	4.12306	6.64453	10.6844	17.702	24.8047	31.072	41.7677	65.0884
0.227247	0.348029	0.496094	0.66291	0.787693	1.01998	1.25484	1.50881	1.87419	2.34007	2.9806	4.13552	6.65623	10.7714	17.74	24.84	31.0802	41.8785	65.5245
0.227526	0.348029	0.496094	0.663288	0.787879	1.02014	1.25673	1.50931	1.88348	2.34007	2.98627	4.1507	6.66274	10.864	17.7646	24.8606	31.1333	41.8803	66.2546
0.227531	0.348029	0.496094	0.663866	0.7879	1.02127	1.25871	1.51062	1.88602	2.34203	2.98688	4.18359	6.67887	10.8717	17.8074	24.8664	31.2306	41.9008	66.7681
0.227816	0.348029	0.496094	0.664518	0.788283	1.02146	1.26282	1.51281	1.88907	2.34395	2.98688	4.2168	6.68419	10.9139	17.8162	24.8928	31.3592	41.9023	68.1398
0.227909	0.348029	0.496094	0.666848	0.789305	1.02272	1.26317	1.51419	1.88907	2.34749	2.98718	4.22422	6.69471	10.9228	17.8575	24.9	31.396	41.9048	68.2942
0.228028	0.348029	0.496094	0.667606	0.790833	1.02636	1.2648	1.5153	1.89589	2.35297	2.99386	4.22671	6.72553	10.9602	17.8798	24.9393	31.4638	41.9199	68.5038
0.228107	0.348029	0.496343	0.66772	0.791363	1.02693	1.2648	1.51631	1.89685	2.357	2.99386	4.24655	6.73848	10.9911	17.9041	24.9528	31.526	42.0125	68.8658
0.228759	0.348029	0.496843	0.667781	0.791551	1.02765	1.2648	1.51652	1.90485	2.35879	2.99716	4.28195	6.73848	11.0375	17.9632	24.9951	31.5887	42.1064	69.2673
0.228785	0.348029	0.497196	0.668211	0.791992	1.02831	1.2648	1.51735	1.90575	2.36728	2.99716	4.28426	6.74322	11.0812	18.029	25.0349	31.5909	42.1127	69.3705
0.228824	0.348029	0.497849	0.669618	0.794884	1.0285	1.2648	1.51798	1.9076	2.36956	3.00838	4.29925	6.7476	11.0813	18.131	25.0585	31.6017	42.1182	69.7853
0.228987	0.348029	0.498185	0.670236	0.79652	1.02914	1.26603	1.521	1.91217	2.37466	3.01762	4.30488	6.77405	11.093	18.1426	25.0759	31.6222	42.1188	70.2657
0.229482	0.348029	0.498328	0.670579	0.796567	1.02936	1.26607	1.52119	1.92205	2.37777	3.01762	4.31263	6.81437	11.1411	18.1596	25.0786	31.7329	42.1775	70.4719
0.2295	0.348029	0.500368	0.671088	0.796806	1.03067	1.26657	1.52207	1.92588	2.37972	3.01762	4.32252	6.81893	11.1659	18.2121	25.1511	31.8565	42.2279	71.3086
0.229531	0.348029	0.500968	0.671537	0.79791	1.03102	1.26915	1.5234	1.92593	2.3841	3.01762	4.32631	6.82083	11.1722	18.25	25.1681	31.8879	42.3787	72.4177
0.229703	0.348029	0.501187	0.67176	0.798438	1.03278	1.26939	1.53249	1.92756	2.38798	3.03166	4.33642	6.82881	11.176	18.254	25.2106	31.8915	42.447	72.5214
0.230279	0.348029	0.50135	0.67254	0.798466	1.03414	1.27168	1.5343	1.93103	2.39092	3.0405	4.35543	6.83413	11.2074	18.2785	25.2354	31.9971	42.4811	72.8192
0.23028	0.348029	0.501826	0.672955	0.798992	1.03726	1.27248	1.53897	1.93229	2.39176	3.04401	4.37392	6.83848	11.2935	18.2853	25.2929	32.0349	42.5444	72.8243
0.230336	0.348029	0.502775	0.673068	0.799356	1.03875	1.27378	1.5428	1.9336	2.39658	3.0496	4.38157	6.87665	11.2964	18.3229	25.3298	32.0579	42.5771	73.2393
0.230627	0.348029	0.502929	0.673131	0.799996	1.03924	1.27699	1.54517	1.93689	2.41707	3.04966	4.39416	6.90976	11.3116	18.3523	25.3573	32.064	42.6576	73.3805
0.230649	0.348029	0.503592	0.673186	0.802996	1.03964	1.2783	1.54549	1.93731	2.42374	3.06289	4.40351	6.93443	11.3132	18.3582	25.3651	32.0945	42.763	73.4155
0.231108	0.348029	0.504417	0.674105	0.805344	1.03991	1.28178	1.54611	1.93731	2.42547	3.06817	4.43374	6.93443	11.3518	18.3732	25.4574	32.1183	42.8282	73.4288
0.231199	0.348029	0.504887	0.675029	0.809855	1.04026	1.28319	1.54715	1.93731	2.42745	3.07547	4.47008	6.9953	11.3533	18.4166	25.4763	32.1618	42.8417	73.4473
0.231254	0.348029	0.50503	0.675119	0.809875	1.0413	1.28337	1.55069	1.93837	2.42794	3.10167	4.47173	7.00721	11.3907	18.4227	25.4958	32.1677	42.8462	73.4745
0.231657	0.348029	0.506554	0.675861	0.810692	1.04409	1.28688	1.55611	1.93846	2.43033	3.1018	4.49191	7.04234	11.4027	18.4614	25.525	32.1819	42.9121	73.898
0.231662	0.348029	0.507422	0.676915	0.811864	1.04409	1.28729	1.55643	1.94192	2.44298	3.10413	4.5347	7.05512	11.4092	18.6009	25.6066	32.2197	42.9225	74.6031
0.232361	0.348029	0.507639	0.677398	0.816516	1.04409	1.28883	1.55643	1.94447	2.4515	3.10608	4.54887	7.05867	11.4612	18.6159	25.6413	32.2878	43.1552	74.878
0.232368	0.348029	0.508064	0.678293	0.817328	1.04409	1.29258	1.55869	1.94751	2.45397	3.1103	4.55624	7.0801	11.4902	18.6277	25.6798	32.3122	43.3714	76.1665
0.232595	0.348029	0.509188	0.678907	0.817915	1.04528	1.30088	1.5593	1.9521	2.45869	3.11631	4.56029	7.1033	11.4902	18.6479	25.6929	32.3268	43.4092	76.2255
0.232728	0.348029	0.509863	0.680392	0.818342	1.04821	1.30153	1.5595	1.95346	2.4625	3.1315	4.57947	7.10742	11.5349	18.6592	25.7753	32.4031	43.4109	76.3442
0.232798	0.348029	0.510153	0.680751	0.82081	1.05202	1.30202	1.56046	1.95444	2.4627	3.13631	4.61394	7.14385	11.5574	18.6709	25.7981	32.5062	43.4422	76.9767
0.232909	0.348029	0.510268	0.681843	0.82138	1.05516	1.30252	1.56259	1.95506	2.47248	3.13757	4.64167	7.17456	11.5603	18.7184	25.9134	32.6088	43.4911	78.2025
0.232943	0.348029	0.510985	0.682356	0.823171	1.05528	1.30256	1.56493	1.9556	2.47621	3.13757	4.64329	7.17856	11.569	18.7322	25.9184	32.6161	43.7137	78.5976
0.232975	0.348029	0.51105	0.685978	0.824348	1.05529	1.30663	1.56523	1.95687	2.48047	3.13757	4.65325	7.21976	11.5978	18.7613	25.9425	32.6649	43.8363	78.6384
0.233096	0.348029	0.511361	0.688202	0.828746	1.05735	1.30774	1.56678	1.95868	2.48098	3.13757	4.66273	7.27045	11.7489	18.7615	25.9987	32.7083	43.8548	78.7093
0.233112	0.348029	0.511662	0.688901	0.830215	1.05761	1.31123	1.56841	1.96875	2.48818	3.14895	4.69752	7.29528	11.7491	18.8427	26.0257	32.7222	43.9035	79.2445
0.233522	0.348029	0.511962	0.689207	0.831501	1.05833	1.31273	1.56898	1.97218	2.48849	3.15501	4.72497	7.327	11.754	18.8437	26.0461	32.7882	43.9134	80.7251
0.233815	0.348029	0.513259	0.689798	0.832463	1.06019	1.31299	1.57068	1.97296	2.49007	3.15649	4.74924	7.33351	11.7645	18.9243	26.1	32.7917	43.9769	80.9592
0.234437	0.348029	0.513259	0.69035	0.835976	1.06081	1.31321	1.57081	1.98368	2.49221	3.18845	4.77256	7.35566	11.7891	18.9283	26.121	32.8754	44.0941	81.3582
0.23445	0.348029	0.513601	0.690677	0.838253	1.06173	1.31589	1.57336	1.98407	2.49222	3.19723	4.77828	7.37037	11.8227	18.9556	26.1358	32.9583	44.1798	81.8152
0.234546	0.348029	0.513728	0.690793	0.840308	1.06289	1.31988	1.57368	1.98407	2.49284	3.19848	4.77828	7.37191	11.8714	18.9584	26.1404	32.963	44.2723	82.214
0.235249	0.348029	0.514527	0.692362	0.841697	1.06651	1.32317	1.57577	1.98407	2.49284	3.20756	4.78874	7.38691	11.8778	18.9649	26.1556	32.9945	44.3187	82.3878
0.235592	0.348029	0.51522	0.693687	0.842393	1.06783	1.32341	1.57577	1.98438	2.49284	3.20867	4.78898	7.42534	11.9215	19.0396	26.2356	33	44.3437	82.7109
0.235894	0.348029	0.515273	0.696058	0.845314	1.06784	1.32379	1.57577	1.99909	2.49398	3.20867	4.79991	7.4278	11.9886	19.0512	26.2555	33.0153	44.4167	82.881
0.236075	0.348029	0.515847	0.696058	0.848126	1.07033	1.32457	1.57577	1.99931	2.50068	3.20867	4.80143	7.43221	12.0041	19.0754	26.3504	33.0635	44.5187	83.2732
0.236129	0.348029	0.516617	0.696058	0.848265	1.07036	1.32526	1.57577	1.99953	2.50456	3.21049	4.8117	7.43366	12.0586	19.0916	26.3706	33.097	44.5187	83.9194
0.236444	0.348029	0.519637	0.696058	0.849942	1.07096	1.32526	1.579	1.99982	2.50893	3.21053	4.82067	7.43561	12.0661	19.1052	26.3948	33.2168	44.6253	85.1506
0.236644	0.348029	0.519802	0.696058	0.852002	1.07287	1.32526	1.58017	1.99982	2.50967	3.22123	4.82081	7.44141	12.2406	19.1217	26.4113	33.2296	44.6272	85.6586
0.236707	0.348029	0.519953	0.696058	0.852052	1.07323	1.32526	1.58071	2.00515	2.50988	3.22461	4.83049	7.47153	12.3429	19.1363	26.4322	33.2547	44.6311	87.4528
0.236724	0.348029	0.520375	0.696058	0.855553	1.074	1.32526	1.58466	2.00793	2.51086	3.22461	4.83482	7.48465	12.3802	19.1889	26.4667	33.4287	44.8273	89.2594
0.236767	0.348209	0.520512	0.696058	0.856108	1.07404	1.32526	1.58707	2.00838	2.51261	3.22461	4.84748	7.53506	12.4758	19.2168	26.5493	33.5223	44.8848	91.3232
0.237038	0.348222	0.521172	0.696058	0.8571	1.07668	1.32526	1.588	2.01561	2.51536	3.22461	4.84748	7.53678	12.4815	19.2205	26.5508	33.536	44.9068
0.237757	0.348669	0.522191	0.696058	0.857301	1.07723	1.32526	1.58818	2.01784	2.51926	3.22461	4.85515	7.54906	12.49	19.2221	26.5701	33.5444	44.9763
0.237817	0.348747	0.522451	0.696058	0.857399	1.07729	1.32526	1.58827	2.02356	2.52341	3.22461	4.87533	7.55332	12.4952	19.295	26.5708	33.6817	44.9799
0.238133	0.350584	0.522652	0.696058	0.857418	1.07908	1.32526	1.58827	2.02787	2.52443	3.22461	4.89683	7.55835	12.4974	19.3072	26.5895	33.7723	45.0326
0.239169	0.350791	0.523432	0.696058	0.859607	1.07975	1.32526	1.58827	2.02894	2.52959	3.22461	4.90338	7.56162	12.5017	19.3192	26.5908	33.7982	45.042
0.239257	0.350791	0.525354	0.696058	0.862217	1.08023	1.3266	1.59127	2.02934	2.52959	3.22983	4.91248	7.60736	12.5179	19.3826	26.5926	33.8496	45.1445
0.239275	0.350791	0.525698	0.696058	0.863063	1.08112	1.32778	1.59159	2.02934	2.52959	3.23414	4.92253	7.64851	12.5411	19.4721	26.606	33.8783	45.1813
0.239752	0.350791	0.525932	0.696058	0.863978	1.082	1.32898	1.59235	2.02934	2.52968	3.23686	4.9375	7.66172	12.5601	19.4732	26.6283	33.8946	45.4745
0.240097	0.350791	0.526444	0.696058	0.869364	1.08504	1.33068	1.59732	2.03088	2.53353	3.24231	4.9423	7.78488	12.5933	19.4839	26.7357	33.9255	45.4813
0.240485	0.350791	0.5271	0.696058	0.869516	1.0859	1.33219	1.59748	2.03221	2.53369	3.2495	4.96094	7.81717	12.5943	19.4991	26.7633	34.0076	45.6313
0.241012	0.350791	0.527494	0.696058	0.870619	1.08729	1.33286	1.59785	2.0402	2.5538	3.25271	4.97361	7.85026	12.6119	19.5365	26.7638	34.0145	45.7436
0.24106	0.350791	0.531487	0.696058	0.870621	1.08767	1.3329	1.60082	2.04331	2.55418	3.26255	4.99574	7.86573	12.6301	19.5985	26.7672	34.0769	45.7523
0.241441	0.350873	0.53227	0.696058	0.870952	1.08836	1.33315	1.60791	2.04367	2.55427	3.26255	4.9994	7.90178	12.636	19.6058	26.7695	34.0846	46.1505
0.241681	0.3516	0.532703	0.696058	0.872001	1.09215	1.3334	1.6113	2.04475	2.55681	3.2833	5.01647	7.92029	12.6456	19.6094	26.8066	34.1233	46.2551
0.241804	0.351685	0.532794	0.696058	0.872406	1.09242	1.33374	1.61373	2.04545	2.56279	3.29031	5.02257	7.96359	12.6535	19.7063	26.811	34.1405	46.2894
0.241976	0.351922	0.532827	0.696058	0.872479	1.09687	1.33485	1.61387	2.04545	2.57021	3.29364	5.04877	7.98773	12.6723	19.7735	26.8281	34.3323	46.4381
0.24203	0.352297	0.532836	0.696058	0.876144	1.09738	1.33577	1.61441	2.04921	2.57048	3.30169	5.04942	8.02874	12.6822	19.8122	26.8376	34.4046	46.5751
0.24204	0.352711	0.533788	0.696058	0.877225	1.09872	1.33577	1.6145	2.05538	2.57054	3.30936	5.09484	8.07248	12.6852	19.8621	26.8405	34.4071	46.7578
0.242776	0.352796	0.535527	0.696058	0.87748	1.09927	1.33908	1.61709	2.057	2.57308	3.31373	5.11314	8.09075	12.7316	19.8667	26.9425	34.4083	46.76
0.242848	0.353466	0.535844	0.696058	0.877562	1.09943	1.33911	1.62124	2.0632	2.57377	3.33727	5.11858	8.11147	12.7318	19.8857	26.9425	34.4882	46.8283
0.242942	0.353593	0.535869	0.696235	0.878619	1.10042	1.34213	1.62148	2.0671	2.57763	3.34724	5.12244	8.12648	12.7328	19.9282	26.9534	34.4962	46.8538
0.243144	0.353794	0.536337	0.696965	0.879748	1.10056	1.34268	1.62179	2.07067	2.58479	3.36751	5.13926	8.13695	12.7753	19.965	26.9974	34.6332	46.9585
0.24404	0.353823	0.536595	0.698172	0.879882	1.10056	1.34318	1.62179	2.07138	2.58969	3.3738	5.15035	8.17342	12.7779	19.9989	27	34.6496	47.1056
0.244062	0.35479	0.537134	0.698306	0.881381	1.10056	1.34354	1.62304	2.07202	2.58969	3.3738	5.16509	8.19013	12.7898	20.0034	27.0012	34.6979	47.1545
0.244436	0.35627	0.537925	0.699823	0.881539	1.10056	1.34422	1.62339	2.07291	2.58969	3.3738	5.17373	8.21538	12.8465	20.0079	27.0132	34.7558	47.187
0.244819	0.35721	0.53904	0.700676	0.882741	1.10056	1.34518	1.62369	2.07421	2.58969	3.38548	5.17382	8.22485	12.8522	20.0161	27.0655	34.7581	47.1963
0.244834	0.357628	0.539975	0.701583	0.883261	1.10056	1.34594	1.62534	2.08736	2.59201	3.40547	5.17449	8.23661	13.005	20.0621	27.0678	34.7737	47.3987
0.245452	0.357723	0.540454	0.701583	0.883824	1.10056	1.34694	1.62633	2.08738	2.60109	3.40621	5.175	8.24538	13.0085	20.0907	27.0844	34.7846	47.4382
0.245474	0.357808	0.540692	0.702613	0.885806	1.10056	1.34715	1.62645	2.08817	2.60153	3.41822	5.18866	8.25424	13.0354	20.1097	27.1146	34.8042	47.471
0.245623	0.359301	0.541301	0.703884	0.887222	1.10056	1.34757	1.62761	2.09212	2.60605	3.42758	5.19753	8.25644	13.0839	20.1406	27.1152	34.863	47.5183
0.24587	0.359422	0.542725	0.704575	0.887304	1.10056	1.34793	1.62817	2.09578	2.61065	3.4295	5.22031	8.2627	13.1399	20.2553	27.1236	34.9003	47.5384
0.246079	0.359784	0.542965	0.704685	0.887304	1.10056	1.34805	1.63521	2.09609	2.61097	3.44519	5.22332	8.31577	13.1562	20.277	27.1292	35.0922	47.6059
0.246094	0.360431	0.543316	0.704687	0.887304	1.10056	1.34921	1.63607	2.09783	2.61264	3.45026	5.23722	8.32728	13.1886	20.344	27.1514	35.1106	47.7923
0.246094	0.360739	0.543412	0.704933	0.887304	1.10056	1.35042	1.63617	2.09965	2.61981	3.45489	5.2377	8.35735	13.1907	20.3994	27.1604	35.1831	47.8966
0.246094	0.361091	0.543991	0.705419	0.887304	1.10056	1.351	1.65058	2.10263	2.62212	3.45489	5.26101	8.36554	13.2308	20.3997	27.1986	35.1844	47.9717
0.246094	0.361289	0.544038	0.705482	0.887304	1.10056	1.35155	1.65085	2.10521	2.62742	3.45489	5.26664	8.37081	13.2904	20.4037	27.2766	35.1921	48.0705
0.246094	0.362069	0.546236	0.706791	0.887304	1.10056	1.35233	1.65085	2.10589	2.62925	3.45489	5.28042	8.37547	13.2954	20.4088	27.3164	35.2552	48.1064
0.246094	0.364185	0.546828	0.708349	0.887304	1.10056	1.35357	1.65085	2.10922	2.63902	3.45674	5.293	8.38431	13.2982	20.4317	27.3302	35.3074	48.3494
0.246094	0.364634	0.54761	0.709619	0.887304	1.10056	1.35459	1.65221	2.11308	2.64502	3.46378	5.29794	8.39398	13.3096	20.4944	27.3318	35.3434	48.3759
0.246094	0.364827	0.548748	0.711077	0.887304	1.10146	1.35723	1.65248	2.11378	2.65051	3.48699	5.32394	8.43359	13.4152	20.5191	27.3478	35.3852	48.3999
0.246094	0.364896	0.550282	0.712364	0.887304	1.10173	1.35907	1.65497	2.11685	2.66191	3.48832	5.33287	8.44817	13.4296	20.5651	27.3999	35.4186	48.4396
0.246094	0.3651	0.550282	0.712794	0.887304	1.10403	1.36092	1.65599	2.11698	2.66848	3.4908	5.34944	8.45058	13.4479	20.5734	27.4274	35.4611	48.4464
0.246094	0.365212	0.550282	0.71414	0.887304	1.1087	1.36279	1.65974	2.11768	2.67155	3.49975	5.35952	8.46118	13.4599	20.5835	27.4285	35.602	48.4581
0.246094	0.365477	0.550282	0.714433	0.887304	1.1093	1.36699	1.66395	2.11931	2.67704	3.50352	5.37516	8.46679	13.4697	20.6032	27.4542	35.7222	48.512
0.246094	0.366616	0.550282	0.715087	0.887304	1.1093	1.36713	1.66395	2.11931	2.68077	3.54118	5.38418	8.47527	13.5572	20.6483	27.4931	35.7826	48.5587
0.246094	0.367605	0.550282	0.715474	0.887304	1.1093	1.36714	1.66674	2.11931	2.68304	3.54921	5.39726	8.52101	13.562	20.6733	27.4932	35.7994	48.7569
0.246094	0.368112	0.550282	0.716758	0.887304	1.10977	1.36732	1.6678	2.12208	2.68435	3.55093	5.44009	8.58511	13.7163	20.6997	27.4974	35.8082	48.7887
0.246094	0.368729	0.550282	0.716816	0.887304	1.11028	1.36879	1.66889	2.12338	2.68681	3.56016	5.46084	8.59548	13.7526	20.7085	27.5229	35.8494	48.8389
0.246094	0.368798	0.550282	0.716988	0.887304	1.11095	1.37088	1.6696	2.12629	2.69834	3.56658	5.46267	8.60361	13.9335	20.7143	27.5343	35.9286	48.976
0.246094	0.36931	0.550282	0.717374	0.887304	1.11111	1.37206	1.6732	2.12631	2.70987	3.58627	5.46417	8.64023	13.9668	20.7567	27.5377	36.0701	49.0387
0.246094	0.36934	0.550282	0.71746	0.887304	1.11116	1.37249	1.67686	2.13144	2.71147	3.60812	5.47034	8.65166	13.9912	20.8238	27.5423	36.1035	49.0717
0.246094	0.369971	0.550282	0.719037	0.887304	1.11175	1.37531	1.68015	2.13206	2.71802	3.61162	5.49292	8.65325	14.0156	20.8551	27.5957	36.2118	49.0863
0.246094	0.370975	0.550282	0.719875	0.887304	1.11219	1.37572	1.68131	2.13378	2.7193	3.61162	5.50282	8.65822	14.0239	20.8728	27.6112	36.2453	49.144
0.246094	0.371001	0.550282	0.720405	0.887304	1.11357	1.37674	1.68146	2.13541	2.72852	3.61162	5.53819	8.66556	14.0334	20.9098	27.6191	36.3106	49.2695
0.246094	0.371603	0.550282	0.721193	0.887304	1.11392	1.37727	1.68339	2.14043	2.72852	3.64337	5.54257	8.69406	14.0506	21.0354	27.7203	36.399	49.3496
0.246094	0.371814	0.550282	0.721215	0.887304	1.11492	1.37736	1.68409	2.14773	2.72852	3.66634	5.59585	8.70712	14.0791	21.0568	27.722	36.506	49.4514
0.246094	0.372759	0.550282	0.722655	0.887304	1.1154	1.3778	1.68454	2.149	2.72852	3.6668	5.6118	8.70861	14.0909	21.0592	27.7495	36.5875	49.6238
0.246094	0.373367	0.550282	0.724382	0.887304	1.1168	1.37908	1.68649	2.15584	2.73836	3.67265	5.61213	8.74477	14.1164	21.0606	27.7811	36.7118	49.9086
0.246094	0.373688	0.550282	0.728872	0.887304	1.11815	1.3801	1.68946	2.15897	2.73977	3.67667	5.62269	8.79375	14.1408	21.0876	27.7835	36.7444	49.9462
0.246094	0.373769	0.550282	0.730113	0.887304	1.11872	1.38078	1.69035	2.16054	2.73977	3.68748	5.6655	8.81139	14.193	21.0877	27.8496	36.7966	50.3127
0.246094	0.373957	0.550282	0.732458	0.887304	1.11902	1.38091	1.69602	2.16383	2.73977	3.68748	5.66778	8.8543	14.2011	21.091	27.9433	36.8443	50.3504
0.246094	0.374954	0.550282	0.732637	0.887515	1.11955	1.38338	1.69612	2.16561	2.73977	3.68748	5.67297	8.87191	14.218	21.1577	28.064	37.0712	50.4171
0.246094	0.375701	0.550282	0.736959	0.889714	1.12324	1.38382	1.69797	2.16842	2.74939	3.70479	5.67553	8.87662	14.2557	21.1703	28.0995	37.1481	50.5535
0.246094	0.376034	0.550282	0.738281	0.89048	1.12454	1.38444	1.69802	2.17299	2.75141	3.70874	5.7081	8.8865	14.3295	21.1718	28.1552	37.2001	50.5949
0.246094	0.376333	0.550282	0.738281	0.89157	1.12767	1.38624	1.70123	2.17459	2.75141	3.71645	5.71047	8.91596	14.4015	21.187	28.1989	37.2239	50.5973
0.246094	0.377095	0.550282	0.738281	0.891909	1.12813	1.38751	1.70546	2.1777	2.75606	3.71777	5.73558	8.91778	14.4778	21.1879	28.2338	37.2832	50.7837
0.246094	0.377145	0.550282	0.738281	0.893659	1.12911	1.38838	1.70718	2.1812	2.76813	3.72407	5.75058	8.92954	14.5073	21.1931	28.2472	37.2904	50.8557
0.246094	0.3775	0.550282	0.738281	0.894346	1.1294	1.38896	1.70771	2.1816	2.77325	3.73906	5.75096	8.94825	14.5131	21.241	28.2752	37.3069	50.9869
0.246094	0.378242	0.550282	0.738281	0.894346	1.12963	1.39013	1.70862	2.18584	2.77325	3.7394	5.75794	8.98081	14.5166	21.261	28.2892	37.3976	51.0209
0.246094	0.378791	0.550282	0.738281	0.894346	1.13004	1.39092	1.71258	2.18816	2.77325	3.75363	5.76616	8.99942	14.6837	21.2657	28.3089	37.4953	51.1392
0.246094	0.379349	0.550282	0.738281	0.894346	1.13165	1.3921	1.71261	2.19351	2.77325	3.7562	5.78061	9.04996	14.7266	21.2829	28.394	37.522	51.1645
0.246094	0.37941	0.550282	0.738281	0.894346	1.13308	1.39212	1.71398	2.196	2.77325	3.77062	5.79329	9.10243	14.764	21.2914	28.5352	37.5887	51.3191
0.246094	0.379417	0.550282	0.738281	0.894346	1.13676	1.39212	1.71479	2.19997	2.77325	3.78724	5.7972	9.12521	14.8038	21.3327	28.6027	37.7938	51.4549
0.246094	0.382999	0.550282	0.738281	0.894346	1.13695	1.39212	1.71615	2.20113	2.77325	3.80141	5.81673	9.12708	14.8063	21.3807	28.8258	37.8155	51.4615
0.246094	0.38301	0.550282	0.738281	0.895083	1.13757	1.39212	1.71934	2.20113	2.77325	3.8204	5.83403	9.19482	14.8231	21.3918	28.8335	37.8816	51.6539
0.246094	0.383183	0.550282	0.738281	0.895513	1.13759	1.39238	1.72005	2.20574	2.77325	3.82832	5.86928	9.20645	14.86	21.5006	28.8897	37.9666	51.929
0.246094	0.384166	0.550282	0.738281	0.89681	1.13916	1.39242	1.72086	2.21333	2.77656	3.84411	5.90926	9.33375	14.8887	21.5509	28.9311	38.0148	52.169
0.246094	0.384497	0.550282	0.738281	0.897658	1.13941	1.39328	1.72156	2.21343	2.77776	3.84976	5.91704	9.3548	14.8991	21.5511	29.013	38.079	52.4897
0.246094	0.384737	0.550282	0.738281	0.898725	1.13982	1.39356	1.72164	2.21484	2.78423	3.8701	5.93355	9.42904	14.9653	21.5557	29.0651	38.1559	52.6234
0.246094	0.385135	0.550282	0.738281	0.898854	1.14019	1.40037	1.72189	2.21484	2.8059	3.88165	5.94712	9.46376	14.979	21.5737	29.0859	38.1567	52.6403
0.246094	0.385225	0.550282	0.738281	0.900198	1.14352	1.40196	1.72631	2.21484	2.80981	3.88255	6.00458	9.47191	14.9834	21.5742	29.0932	38.1612	52.7078
0.246094	0.385588	0.550282	0.738281	0.901287	1.14524	1.40266	1.73631	2.2186	2.82817	3.88255	6.03684	9.49489	15.0041	21.6157	29.1074	38.1665	52.7574
0.246094	0.386384	0.550282	0.738281	0.903322	1.14602	1.40284	1.73967	2.22101	2.82817	3.88376	6.06327	9.56096	15.0533	21.6582	29.1595	38.2024	53.1826
0.246094	0.386683	0.550282	0.738281	0.904479	1.14916	1.40317	1.74015	2.22706	2.82817	3.88566	6.10492	9.57238	15.0946	21.6689	29.1683	38.2121	53.2001
0.246094	0.386867	0.550282	0.738281	0.90581	1.15062	1.40532	1.74015	2.22847	2.82853	3.89108	6.12066	9.57393	15.1383	21.717	29.1723	38.2523	53.2096
0.246094	0.387108	0.550282	0.738281	0.90727	1.15082	1.40672	1.74099	2.22847	2.83574	3.89763	6.14018	9.62748	15.1437	21.7745	29.2093	38.2869	53.2475
0.246094	0.387661	0.550282	0.738281	0.90754	1.15463	1.40681	1.74232	2.2286	2.83753	3.90298	6.16565	9.698	15.2192	21.7921	29.2106	38.2933	53.3892
0.246094	0.389272	0.550282	0.738281	0.908257	1.15477	1.40731	1.74446	2.23242	2.84464	3.92197	6.18314	9.71007	15.2463	21.8254	29.2527	38.3247	53.5672
0.246094	0.389387	0.550282	0.738281	0.909226	1.15578	1.40731	1.7445	2.23242	2.85312	3.946	6.20117	9.7192	15.2897	21.8505	29.2676	38.3559	53.6345
0.246094	0.389441	0.550282	0.738281	0.911286	1.15846	1.41005	1.74606	2.2329	2.85539	3.95828	6.20613	9.72135	15.3616	21.8727	29.2883	38.3906	53.6469
0.246094	0.389572	0.550282	0.738281	0.911453	1.15899	1.41338	1.74632	2.23548	2.86202	3.97577	6.20902	9.72492	15.4184	21.8784	29.376	38.4269	53.9622
0.246094	0.389693	0.550282	0.738808	0.912009	1.16422	1.41469	1.74957	2.23845	2.8709	3.98273	6.21518	9.73549	15.4902	21.8913	29.5221	38.4441	54.036
0.246094	0.389963	0.550282	0.740633	0.912702	1.16496	1.41595	1.75254	2.2398	2.87648	3.99843	6.21697	9.75103	15.5154	21.9079	29.5537	38.4487	54.064
0.246094	0.390511	0.550282	0.740942	0.912806	1.16734	1.41681	1.75317	2.24313	2.87696	4.00732	6.25558	9.75247	15.5568	21.9256	29.5848	38.4992	54.1459
0.246094	0.390738	0.550282	0.741742	0.915909	1.16852	1.41811	1.75396	2.25558	2.8927	4.00773	6.29013	9.78133	15.6231	21.9533	29.6433	38.5022	54.2378
0.246094	0.390922	0.550282	0.743039	0.916441	1.16897	1.41971	1.75396	2.25921	2.89516	4.00976	6.30014	9.78298	15.6595	21.9588	29.659	38.5462	54.3789
0.246094	0.391371	0.550282	0.743566	0.917645	1.17171	1.42144	1.75415	2.26009	2.89672	4.01533	6.35094	9.7845	15.7231	21.985	29.6796	38.6332	54.3964
0.246094	0.391513	0.550282	0.743852	0.917658	1.17237	1.42509	1.75569	2.2604	2.90331	4.03624	6.3531	9.78764	15.7285	22.0033	29.7201	38.6516	54.5962
0.246094	0.391608	0.550282	0.744141	0.918313	1.17253	1.42572	1.75654	2.26099	2.90331	4.05868	6.41734	9.80059	15.7331	22.13	29.7447	38.6993	54.9053
0.246094	0.391828	0.550282	0.744141	0.919903	1.17346	1.42754	1.75852	2.26549	2.91387	4.07075	6.49201	9.81667	15.7353	22.1313	29.7516	38.7342	55.0865
0.246094	0.392105	0.550282	0.744141	0.921807	1.17513	1.42918	1.76375	2.2664	2.91442	4.07445	6.49201	9.83223	15.7742	22.1463	29.8894	38.7447	55.1928
0.246094	0.392807	0.550282	0.744141	0.922508	1.17801	1.43125	1.76588	2.26838	2.9173	4.09117	6.50172	9.85166	15.7817	22.1478	29.9035	38.7541	55.4694
0.246094	0.393219	0.550282	0.744141	0.923915	1.18086	1.43343	1.76754	2.26887	2.91962	4.10572	6.5078	9.86856	15.7827	22.1644	29.9264	38.7712	55.5769
0.246094	0.393651	0.550282	0.744141	0.924388	1.18209	1.4343	1.77302	2.27053	2.91964	4.12528	6.51094	9.89285	15.8284	22.165	29.9371	39.0301	55.7857
0.246094	0.393705	0.550282	0.744141	0.929077	1.18257	1.43496	1.77307	2.27124	2.92372	4.1433	6.53625	9.89976	15.8366	22.222	29.9486	39.0735	55.8017
0.246094	0.394345	0.550282	0.744141	0.930254	1.18764	1.43496	1.77461	2.28247	2.93388	4.17947	6.57752	9.90063	15.8434	22.2238	30.0081	39.0782	55.8241
0.246094	0.394918	0.550282	0.744141	0.930646	1.18792	1.43496	1.77461	2.28688	2.94504	4.18717	6.5862	9.90239	15.8535	22.2684	30.0178	39.082	55.8464
0.246094	0.39574	0.550282	0.744141	0.93113	1.18909	1.43496	1.77461	2.28775	2.95424	4.20078	6.58939	9.90325	15.8726	22.2807	30.0517	39.1851	55.9221
0.246094	0.396036	0.550282	0.744141	0.933898	1.18914	1.43496	1.77461	2.28915	2.95586	4.21747	6.59454	9.91505	15.8971	22.2954	30.0857	39.2703	55.9288
0.246094	0.397073	0.550282	0.744141	0.934583	1.18926	1.43496	1.77566	2.28998	2.96434	4.23302	6.66773	9.92036	15.9293	22.3005	30.0977	39.4566	55.9471
0.246094	0.397092	0.550282	0.744188	0.935686	1.19083	1.43496	1.77616	2.29071	2.96746	4.23396	6.68786	9.97211	15.9406	22.3456	30.1483	39.5873	55.9532
0.246094	0.397204	0.550282	0.744591	0.935858	1.19313	1.43496	1.77635	2.29166	2.97542	4.24588	6.69727	10.1714	15.9532	22.4356	30.209	39.7561	56.0059
0.246094	0.397224	0.550282	0.744702	0.936606	1.19403	1.43496	1.782	2.29723	2.97656	4.24767	6.70186	10.1773	16.0239	22.4449	30.2139	39.7731	56.1369
0.246094	0.397411	0.550282	0.745181	0.943711	1.19487	1.43496	1.78794	2.29805	2.97656	4.27068	6.71212	10.2371	16.1597	22.4539	30.2171	39.9174	56.3973
0.246094	0.397482	0.550282	0.745843	0.944148	1.1949	1.43496	1.78869	2.30985	2.97656	4.27365	6.71811	10.2446	16.1822	22.5233	30.2322	39.9348	56.4948
0.246094	0.397537	0.550282	0.746142	0.945433	1.19581	1.43496	1.79159	2.31321	2.99012	4.27417	6.7219	10.3171	16.2323	22.5751	30.2689	39.9621	56.6699
0.246094	0.398039	0.550282	0.746529	0.946682	1.19626	1.43649	1.79211	2.31699	2.99085	4.29431	6.7267	10.3301	16.252	22.5817	30.299	39.9964	56.9158
0.246094	0.398052	0.550282	0.746715	0.947804	1.19638	1.43763	1.79525	2.3199	2.99393	4.30407	6.74117	10.3389	16.3074	22.6134	30.3059	40.0732	56.9522
0.246094	0.398087	0.550282	0.749191	0.948268	1.19724	1.43798	1.79635	2.32039	2.99716	4.33466	6.743	10.3579	16.3443	22.643	30.3105	40.0879	57.1111
0.246094	0.398186	0.550609	0.749843	0.948602	1.19731	1.43838	1.79745	2.32749	2.99716	4.33905	6.75384	10.3826	16.404	22.681	30.3767	40.1663	57.1887
0.246094	0.398516	0.550714	0.750285	0.949174	1.19745	1.43946	1.79783	2.3318	2.99716	4.34004	6.75484	10.3848	16.4058	22.6897	30.3997	40.2268	57.3629
0.246094	0.399975	0.552658	0.750809	0.950033	1.20059	1.44015	1.80022	2.34007	3.00489	4.36729	6.75992	10.5461	16.458	22.6935	30.4124	40.2478	57.3675
0.246094	0.400083	0.552683	0.750847	0.952174	1.20116	1.44312	1.80354	2.34226	3.00529	4.38157	6.78039	10.5646	16.4785	22.7328	30.4209	40.2636	57.4947
0.246094	0.400103	0.553023	0.752383	0.953257	1.20204	1.44329	1.80581	2.34318	3.01491	4.40389	6.80141	10.5702	16.5075	22.7381	30.4375	40.2701	57.5233
0.246094	0.400491	0.55414	0.752703	0.953274	1.20326	1.44435	1.80581	2.35318	3.01762	4.40663	6.80662	10.5877	16.5414	22.7884	30.4659	40.309	57.5474
0.246094	0.401105	0.55465	0.753184	0.953589	1.20449	1.44439	1.80581	2.37335	3.01762	4.40878	6.82524	10.6505	16.5451	22.8074	30.4978	40.35	57.9374
0.246094	0.40112	0.55465	0.754568	0.954117	1.20457	1.44469	1.80581	2.37505	3.01762	4.41417	6.83879	10.6775	16.601	22.8178	30.5107	40.3837	58.1907
0.246094	0.401523	0.55465	0.755985	0.954536	1.20516	1.44564	1.80665	2.38426	3.02773	4.41426	6.87754	10.6846	16.6052	22.8333	30.5145	40.421	58.7655
0.246094	0.401843	0.55465	0.756052	0.954744	1.20534	1.44634	1.80912	2.38979	3.02936	4.41995	6.88535	10.6846	16.6264	22.8761	30.5209	40.4256	58.7984
0.246094	0.401859	0.55465	0.756233	0.956258	1.20627	1.44635	1.81145	2.39527	3.03345	4.43652	6.93006	10.6864	16.6364	22.8988	30.535	40.4651	58.8005
0.246094	0.403027	0.55465	0.756506	0.958191	1.20892	1.44635	1.81197	2.39694	3.03595	4.4372	6.93006	10.6956	16.6966	22.9197	30.6058	40.4766	59.0539
0.246094	0.403177	0.55465	0.757499	0.960261	1.20927	1.45004	1.81765	2.4014	3.03631	4.47996	6.94974	10.7259	16.7599	22.9264	30.7575	40.4894	59.141
0.246094	0.403661	0.55465	0.757704	0.960608	1.20992	1.45047	1.81931	2.40614	3.03795	4.48169	6.99963	10.7336	16.762	23.0023	30.7932	40.535	59.1756
0.246094	0.403909	0.55465	0.758559	0.962452	1.21036	1.45117	1.82484	2.40622	3.04401	4.49232	7.01618	10.7636	16.8204	23.0077	30.8011	40.5694	59.195
0.246094	0.404062	0.55465	0.759374	0.962521	1.21232	1.45143	1.82534	2.40976	3.04972	4.50729	7.03368	10.8026	16.8354	23.0115	30.8218	40.625	59.304
0.246094	0.404324	0.55465	0.759392	0.963539	1.21401	1.45209	1.82546	2.41712	3.05453	4.51921	7.03468	10.8073	16.8532	23.1549	30.8624	40.6339	59.3742
0.246094	0.40485	0.554708	0.759642	0.963681	1.21412	1.45211	1.82785	2.42262	3.06094	4.51951	7.05135	10.8437	16.8664	23.2359	30.8922	40.6509	59.4428
0.246094	0.405059	0.556147	0.761469	0.96395	1.21476	1.45391	1.83433	2.42374	3.06138	4.52377	7.06437	10.852	16.921	23.2369	30.9306	40.6907	59.8125
0.246094	0.405394	0.556291	0.761996	0.964521	1.21644	1.45922	1.84601	2.42374	3.06264	4.53892	7.08007	10.8602	16.9235	23.2814	30.9521	40.6971	61.1591
0.246094	0.405465	0.557335	0.762239	0.96795	1.21676	1.4596	1.85173	2.42374	3.06817	4.56029	7.08081	10.9864	16.9277	23.3112	30.9542	40.7191	61.4024
0.246094	0.405844	0.557573	0.763539	0.968603	1.21929	1.46292	1.85227	2.42693	3.06995	4.56513	7.10182	11.0035	16.9679	23.3205	30.9974	40.7286	62.0049
0.246094	0.406289	0.558478	0.764526	0.969881	1.21957	1.46324	1.85317	2.42847	3.07311	4.58079	7.13097	11.0115	17.025	23.3484	31.0644	40.8291	62.4966
0.246094	0.406435	0.559226	0.76534	0.970696	1.22006	1.46376	1.8587	2.43039	3.09624	4.59742	7.13489	11.0246	17.057	23.3499	31.2306	40.8847	63.2367
0.246094	0.406691	0.560133	0.765682	0.972626	1.22153	1.46642	1.859	2.43045	3.10802	4.61347	7.14728	11.0541	17.1426	23.3701	31.2836	40.96	63.9493
0.246094	0.4067	0.560262	0.768417	0.973774	1.22387	1.46804	1.85988	2.4362	3.11287	4.64234	7.14936	11.0551	17.2011	23.3795	31.2889	41.0107	64.1054
0.246094	0.406867	0.560737	0.769289	0.974039	1.22496	1.46905	1.87032	2.43911	3.11688	4.67169	7.15477	11.0652	17.2897	23.4238	31.34	41.0509	64.3202
0.246094	0.407302	0.562178	0.769356	0.975695	1.22612	1.46905	1.8713	2.44336	3.17062	4.6857	7.20429	11.093	17.3125	23.4254	31.3492	41.2877	64.8027
0.246094	0.407596	0.564721	0.76937	0.975839	1.2272	1.46998	1.87169	2.44954	3.17421	4.71994	7.23225	11.0942	17.3253	23.4307	31.3788	41.2948	65.3823
0.246094	0.408355	0.56626	0.76938	0.978753	1.228	1.47079	1.87419	2.44984	3.17486	4.72663	7.23614	11.0997	17.3747	23.4449	31.4746	41.4404	65.4169
0.246094	0.4086	0.566691	0.770585	0.97946	1.23047	1.47294	1.87877	2.45112	3.19922	4.73371	7.25	11.1641	17.3934	23.4503	31.5463	41.4826	66.3486
0.246094	0.408807	0.567617	0.770963	0.982361	1.23047	1.47656	1.88667	2.46951	3.22309	4.75299	7.27837	11.2014	17.4239	23.4999	31.5927	41.5728	66.3546
0.246094	0.409098	0.567767	0.77212	0.983864	1.23047	1.4786	1.88864	2.47024	3.22461	4.76482	7.30151	11.2233	17.424	23.5105	31.5951	41.6482	66.5173
0.246094	0.4099	0.568181	0.77335	0.984375	1.23047	1.48113	1.88865	2.47298	3.22461	4.77828	7.30303	11.2249	17.4283	23.5114	31.666	41.8492	67.3133
0.246094	0.409981	0.568931	0.773974	0.984375	1.23047	1.48463	1.88907	2.47519	3.22461	4.77828	7.31182	11.252	17.4779	23.5416	31.6735	41.9441	67.9972
0.246094	0.411259	0.56964	0.774359	0.984375	1.23047	1.48534	1.88907	2.47692	3.22461	4.82293	7.32746	11.323	17.5142	23.6189	31.6843	42.0173	68.2457
0.246094	0.412142	0.569957	0.774898	0.984375	1.23047	1.48828	1.89477	2.47719	3.22461	4.83403	7.35537	11.3322	17.5396	23.8089	31.7071	42.1152	68.4375
0.246094	0.412171	0.569997	0.775109	0.984375	1.23047	1.48955	1.89861	2.4803	3.22461	4.84748	7.36634	11.3444	17.5448	23.8317	31.7131	42.1281	68.5012
0.246094	0.412582	0.570343	0.775274	0.984375	1.23137	1.49054	1.90136	2.48047	3.22461	4.85068	7.37047	11.3488	17.5832	23.8494	31.7472	42.1833	68.6479
0.246094	0.41291	0.570436	0.775541	0.984375	1.23197	1.49154	1.90242	2.48047	3.22461	4.90107	7.37209	11.3571	17.5952	23.9201	31.7765	42.1972	68.6584
0.246094	0.413142	0.571258	0.775589	0.984375	1.23349	1.49234	1.90391	2.48047	3.22461	4.9099	7.38691	11.4073	17.6125	23.9413	31.8337	42.1978	68.9486
0.246094	0.413205	0.571358	0.77649	0.984375	1.23395	1.49693	1.9082	2.48047	3.22461	4.91532	7.38851	11.4152	17.6317	23.9457	31.8983	42.2214	68.9809
0.246094	0.4152	0.572952	0.776614	0.984375	1.23424	1.49693	1.91661	2.48047	3.23643	4.91741	7.40329	11.4162	17.6393	23.9711	32.0102	42.2314	69.0639
0.246094	0.415257	0.573468	0.77804	0.984375	1.23575	1.49693	1.92205	2.48047	3.24663	4.92188	7.42684	11.4686	17.6463	23.9799	32.0965	42.2466	69.7693
0.246094	0.415448	0.57574	0.778217	0.984375	1.23644	1.49693	1.92205	2.48047	3.24742	4.93673	7.42868	11.5119	17.6578	23.9825	32.1445	42.2492	70.1091
0.246094	0.416819	0.576096	0.778217	0.984375	1.24023	1.49952	1.92205	2.48047	3.2483	4.9423	7.47434	11.5388	17.7141	23.9862	32.1518	42.2494	70.2202
0.246094	0.417052	0.577262	0.778217	0.984375	1.24023	1.5033	1.9282	2.49284	3.255	4.95254	7.49855	11.5449	17.7529	24.0086	32.1554	42.3589	70.5804
0.246094	0.417184	0.577394	0.778217	0.984375	1.24023	1.50547	1.92963	2.50427	3.26158	4.96033	7.49906	11.5899	17.7894	24.0192	32.1932	42.3979	71.3798
0.246094	0.417221	0.577534	0.778217	0.986222	1.24023	1.50714	1.93062	2.51695	3.26255	4.97948	7.53001	11.6133	17.8044	24.0845	32.2005	42.4013	71.4493
0.246094	0.418045	0.577572	0.778217	0.988617	1.24023	1.50881	1.93142	2.51898	3.26255	4.98568	7.53607	11.6603	17.8147	24.1409	32.2136	42.429	71.4527
0.246094	0.418065	0.578049	0.778217	0.988648	1.24023	1.50881	1.93243	2.52365	3.26919	4.99295	7.54143	11.7067	17.8569	24.1515	32.3339	42.528	71.5771
0.246094	0.419703	0.578099	0.778217	0.991271	1.24023	1.51189	1.93731	2.52959	3.27422	5.00145	7.54979	11.7764	17.9047	24.16	32.3596	42.6427	71.5804
0.246094	0.419948	0.578973	0.778217	0.991644	1.24023	1.51491	1.93731	2.52959	3.28888	5.04959	7.60107	11.7819	17.9073	24.1886	32.4449	42.7748	71.6556
0.246094	0.420132	0.579452	0.778217	0.992188	1.24023	1.51599	1.93731	2.53234	3.29183	5.05044	7.63287	11.8012	17.9648	24.1939	32.4827	42.775	71.748
0.246094	0.420476	0.580939	0.778217	0.992188	1.24023	1.5177	1.93731	2.53631	3.29526	5.06697	7.65246	11.8125	18.0057	24.2054	32.5949	42.8634	73.1971
0.246094	0.421441	0.581105	0.778217	0.992188	1.24023	1.51829	1.94125	2.54065	3.30292	5.0673	7.66085	11.8503	18.0255	24.2091	32.6302	42.8955	73.2153
0.246094	0.422953	0.581194	0.778217	0.992188	1.24169	1.51889	1.9456	2.54976	3.30324	5.07146	7.66821	11.8778	18.0676	24.2146	32.7367	43.0877	73.3756
0.246094	0.422986	0.581443	0.778217	0.992188	1.2419	1.51914	1.94668	2.5534	3.30936	5.07456	7.66988	11.9025	18.0937	24.3035	32.7469	43.1355	73.9716
0.246094	0.423104	0.582352	0.778217	0.992738	1.24199	1.52223	1.94775	2.5538	3.32798	5.09004	7.67508	11.9076	18.1009	24.3048	32.776	43.1505	74.6816
0.246094	0.424132	0.582667	0.778217	0.99342	1.24241	1.52239	1.94775	2.5538	3.34531	5.09405	7.68719	11.9083	18.1045	24.307	32.7816	43.1799	75.8708
0.246094	0.424505	0.583284	0.778217	0.996773	1.24261	1.52278	1.94934	2.5538	3.34724	5.11237	7.70482	11.94	18.1141	24.314	32.8193	43.3394	75.9095
0.246094	0.425375	0.583383	0.778217	0.997636	1.24317	1.52389	1.96527	2.5538	3.34724	5.12088	7.74987	12.0007	18.1215	24.3857	32.8303	43.4032	76.0462
0.246094	0.425627	0.584305	0.778217	0.998085	1.24381	1.5256	1.96633	2.5538	3.35806	5.12385	7.77096	12.038	18.1677	24.4289	32.994	43.4633	76.0664
0.246094	0.427254	0.584482	0.778217	0.998756	1.24504	1.52829	1.96875	2.5538	3.36714	5.1251	7.77951	12.0661	18.1857	24.4373	33.0186	43.5384	76.5035
0.246094	0.427635	0.584667	0.778217	1.00259	1.24528	1.52887	1.97215	2.5538	3.37143	5.12946	7.78488	12.0782	18.192	24.4581	33.0545	43.599	78.1564
0.246094	0.427644	0.585025	0.778217	1.00384	1.24537	1.5296	1.97557	2.56138	3.3738	5.14271	7.78883	12.0925	18.1943	24.4612	33.0785	43.6203	78.2418
0.246094	0.427922	0.585464	0.778217	1.00416	1.24763	1.52984	1.97777	2.56435	3.3738	5.15198	7.79506	12.1503	18.2203	24.4646	33.097	43.6209	78.3816
0.246094	0.42813	0.585478	0.778217	1.00437	1.24797	1.53151	1.98339	2.56929	3.38585	5.17215	7.79773	12.2526	18.2322	24.469	33.1029	43.709	78.5244
0.246094	0.428236	0.585791	0.778217	1.00459	1.24854	1.53192	1.98401	2.56929	3.38902	5.17382	7.85073	12.2927	18.251	24.4793	33.2353	43.724	78.7497
0.246094	0.428797	0.586575	0.778217	1.00578	1.24893	1.53606	1.98407	2.57616	3.39117	5.19723	7.85189	12.3856	18.2611	24.4863	33.3063	43.7491	78.9685
0.246094	0.42943	0.587155	0.778217	1.00589	1.25008	1.54385	1.98438	2.58359	3.39509	5.20195	7.94249	12.4154	18.2845	24.5821	33.3227	43.9358	79.6027
0.246094	0.430043	0.587566	0.778217	1.00687	1.2507	1.54444	1.98601	2.58889	3.40115	5.22044	7.95124	12.4484	18.3385	24.5921	33.3863	43.9519	79.6755
0.246094	0.430055	0.587841	0.778217	1.00822	1.25309	1.5448	1.99379	2.58969	3.40953	5.23241	7.95286	12.4543	18.3649	24.6252	33.396	43.9771	79.8773
0.246094	0.43018	0.588092	0.778217	1.0114	1.25361	1.54533	1.99982	2.58969	3.40996	5.25893	7.95574	12.5309	18.3684	24.6637	33.5516	44.0139	80.6366
0.246094	0.43025	0.588188	0.778217	1.01467	1.2542	1.54881	1.99982	2.59384	3.41884	5.26869	7.96929	12.5809	18.378	24.6816	33.5707	44.0268	80.8572
0.246094	0.43054	0.588368	0.778217	1.01467	1.25484	1.55209	2.00834	2.60213	3.42104	5.28912	7.99539	12.5943	18.3899	24.7182	33.7438	44.0966	81.5555
0.246094	0.430894	0.588505	0.778217	1.01467	1.25484	1.55219	2.00894	2.60777	3.42635	5.30082	8.01251	12.6262	18.4439	24.724	33.8317	44.1085	82.2622
0.246094	0.431138	0.588813	0.778217	1.01467	1.25484	1.55336	2.01625	2.61512	3.42769	5.35439	8.03488	12.6493	18.4684	24.8357	33.9227	44.4165	82.4148
0.246094	0.431546	0.590709	0.778217	1.01467	1.25484	1.55631	2.01693	2.61699	3.43456	5.36607	8.05378	12.6503	18.5655	24.8615	33.9783	44.4182	84.0068
0.246094	0.431777	0.590847	0.778217	1.01467	1.25484	1.55643	2.01793	2.6233	3.44598	5.38037	8.07964	12.6539	18.5744	24.8654	33.986	44.502	85.6064
0.246094	0.433094	0.591008	0.778217	1.01467	1.25484	1.55643	2.02299	2.62398	3.44979	5.41142	8.08846	12.6686	18.6008	24.8974	33.9913	44.6914	87.1003
0.246094	0.433428	0.593838	0.778217	1.01467	1.25484	1.55643	2.02617	2.63438	3.45226	5.41743	8.11141	12.6892	18.6033	24.9136	34.015	44.7096	88.1287
0.246094	0.433512	0.594868	0.778217	1.01467	1.25484	1.56549	2.02696	2.63677	3.46247	5.41743	8.11404	12.7043	18.6204	24.9183	34.0625	44.7891
0.246094	0.435141	0.594923	0.779291	1.01467	1.25484	1.56609	2.02806	2.65051	3.4679	5.42655	8.11869	12.7138	18.6787	24.9592	34.0735	44.9123
0.246094	0.435621	0.597229	0.779339	1.01467	1.25484	1.56659	2.0288	2.65136	3.4938	5.43639	8.14705	12.7194	18.6875	24.9761	34.098	44.9583
0.246094	0.43675	0.597268	0.780025	1.01467	1.25484	1.56879	2.02934	2.65908	3.49397	5.44009	8.18096	12.7426	18.6918	24.9821	34.0998	44.9918
0.246094	0.436752	0.597307	0.781246	1.01467	1.25484	1.57476	2.02934	2.66281	3.49765	5.44475	8.18201	12.7637	18.7034	24.9826	34.1296	45.0285
0.246094	0.436838	0.598304	0.781305	1.01467	1.25484	1.57527	2.03017	2.66927	3.50197	5.44864	8.19829	12.8412	18.7042	24.9867	34.1457	45.0866
0.246094	0.437095	0.59868	0.781642	1.01467	1.25484	1.57577	2.03111	2.67155	3.50538	5.45902	8.20885	12.8459	18.7047	25.0013	34.1931	45.1265
0.246094	0.437498	0.599772	0.781891	1.01467	1.25484	1.57577	2.03238	2.67155	3.50782	5.46417	8.22185	12.8465	18.7539	25.0024	34.3519	45.1813
0.246094	0.437547	0.600715	0.782336	1.01467	1.25484	1.57577	2.0383	2.67794	3.51288	5.48646	8.22483	12.8855	18.7684	25.0282	34.3589	45.1816
0.246094	0.438294	0.603847	0.784057	1.01467	1.25484	1.57577	2.04545	2.68304	3.5185	5.49894	8.22819	12.9109	18.8029	25.0352	34.3986	45.3327
0.246094	0.438998	0.60407	0.78435	1.01467	1.25484	1.57832	2.04816	2.68409	3.52949	5.50198	8.23735	12.9355	18.8249	25.054	34.5022	45.3393
0.246094	0.439147	0.605024	0.784393	1.01467	1.25686	1.57995	2.05048	2.68863	3.54422	5.50753	8.26757	12.9471	18.8254	25.0798	34.5135	45.3627
0.246094	0.439652	0.605135	0.784393	1.01467	1.25786	1.582	2.05075	2.69279	3.55149	5.53027	8.26928	12.9486	18.8397	25.0926	34.5413	45.3667
0.246094	0.439883	0.605727	0.784393	1.01467	1.25855	1.58295	2.0563	2.70561	3.55149	5.5814	8.29011	12.9521	18.8642	25.1557	34.6562	45.5555
0.246094	0.440024	0.605787	0.784393	1.01467	1.26021	1.58314	2.0571	2.71722	3.55402	5.59282	8.29911	12.9615	18.8833	25.1642	34.6794	45.5765
0.246094	0.440478	0.606501	0.784393	1.01467	1.26109	1.58559	2.06152	2.72852	3.55891	5.59713	8.31036	13.0151	18.8962	25.17	34.7073	45.7134
0.246094	0.440614	0.606678	0.784393	1.01467	1.26159	1.58827	2.06706	2.72852	3.61162	5.63031	8.31605	13.0227	18.898	25.1726	34.8183	45.8553
0.246094	0.440837	0.607631	0.784393	1.01619	1.26181	1.58827	2.06776	2.72852	3.61162	5.63134	8.31715	13.0314	18.9096	25.1741	34.8489	45.9194
0.246094	0.441117	0.609065	0.784393	1.01807	1.26218	1.58926	2.06787	2.72852	3.61162	5.64737	8.36292	13.0355	18.9193	25.2289	34.8598	46.0179
0.246094	0.441404	0.609092	0.784393	1.02043	1.26306	1.58933	2.07031	2.72852	3.61162	5.65045	8.41643	13.0366	18.9228	25.2783	34.9331	46.204
0.246094	0.441682	0.611075	0.784571	1.0216	1.2648	1.59543	2.07091	2.73037	3.62124	5.6655	8.41839	13.0433	18.9636	25.3275	34.9781	46.3393
0.246094	0.441917	0.611498	0.787527	1.02272	1.2648	1.59849	2.0831	2.73177	3.62264	5.68149	8.43359	13.0777	18.9874	25.3275	34.9843	46.567
0.246094	0.442448	0.61157	0.78773	1.02272	1.2648	1.60028	2.0863	2.73202	3.6579	5.69078	8.4402	13.0785	19.0425	25.3423	35.0155	46.5727
0.246094	0.443528	0.61167	0.790674	1.02272	1.2648	1.60347	2.09163	2.73628	3.66373	5.69285	8.51722	13.0801	19.0639	25.3506	35.0686	46.5885
0.246094	0.444115	0.61184	0.790745	1.02272	1.2648	1.60399	2.09413	2.73738	3.66814	5.69685	8.5311	13.0804	19.0964	25.3671	35.1755	46.6651
0.246094	0.446191	0.611981	0.79084	1.02341	1.2648	1.60557	2.09911	2.73977	3.67046	5.70292	8.54558	13.1574	19.1041	25.3963	35.2001	46.676
0.246094	0.446343	0.612312	0.791768	1.02366	1.26576	1.6088	2.09937	2.73977	3.67167	5.70614	8.56138	13.1576	19.1051	25.4109	35.2235	46.7066
0.246094	0.446668	0.61443	0.793182	1.02455	1.26782	1.61508	2.10041	2.77124	3.67811	5.72399	8.57316	13.1747	19.1543	25.4753	35.2366	46.7711
0.246094	0.447224	0.615603	0.793376	1.02489	1.27045	1.62209	2.10263	2.7732	3.68315	5.72399	8.57457	13.1756	19.1655	25.5054	35.2553	46.8503
0.246094	0.447367	0.61569	0.793393	1.02674	1.2712	1.62527	2.10263	2.77325	3.6845	5.72661	8.5751	13.2064	19.1894	25.5119	35.2567	46.8959
0.246094	0.447856	0.61585	0.795037	1.02683	1.2719	1.62757	2.10263	2.77325	3.70845	5.79858	8.58511	13.2081	19.1912	25.531	35.2757	47.1114
0.246094	0.448363	0.616776	0.796884	1.02705	1.27834	1.62809	2.10475	2.77325	3.7101	5.86579	8.58511	13.2538	19.2728	25.5428	35.4201	47.187
0.246094	0.448409	0.617106	0.797798	1.02761	1.27984	1.62952	2.11519	2.77325	3.72832	5.91823	8.60309	13.3003	19.2863	25.5921	35.4298	47.213
0.246094	0.448415	0.617357	0.798246	1.02851	1.28161	1.63353	2.11698	2.77325	3.77533	5.95221	8.6168	13.3226	19.2935	25.6623	35.4577	47.2685
0.246094	0.450194	0.617476	0.800607	1.0293	1.28263	1.64148	2.11698	2.77325	3.79061	5.96009	8.62419	13.3339	19.3174	25.6654	35.4776	47.351
0.246094	0.450477	0.617635	0.801039	1.03006	1.28437	1.64563	2.11896	2.77325	3.81873	5.97431	8.64308	13.3624	19.3549	25.7284	35.4921	47.3581
0.246094	0.450517	0.618509	0.80111	1.03163	1.28678	1.65085	2.12418	2.77325	3.8204	5.97673	8.65325	13.3715	19.4021	25.7327	35.5409	47.5756
0.246094	0.450958	0.618965	0.802411	1.03277	1.28955	1.65085	2.12785	2.77431	3.8204	5.98791	8.69725	13.3731	19.4367	25.7503	35.62	47.5869
0.246094	0.452436	0.619783	0.802507	1.03453	1.29119	1.65085	2.13378	2.77877	3.85063	6.00199	8.69725	13.4103	19.476	25.76	35.6432	47.6864
0.246094	0.45266	0.619811	0.803296	1.03467	1.29205	1.65085	2.13378	2.78737	3.85072	6.00458	8.74558	13.5407	19.4803	25.7838	35.7966	47.9282
0.246094	0.453093	0.619952	0.803708	1.03519	1.29462	1.65085	2.13378	2.78857	3.88015	6.02999	8.77576	13.5526	19.5133	25.8566	35.864	47.9813
0.246094	0.453207	0.622386	0.805153	1.03622	1.29503	1.65716	2.13378	2.79453	3.88255	6.03142	8.78414	13.6105	19.5789	25.8979	35.896	48.0841
0.246094	0.454305	0.622678	0.805936	1.03624	1.29647	1.66409	2.13378	2.80009	3.88255	6.06787	8.79011	13.6155	19.5793	25.9288	35.9386	48.1268
0.246094	0.454489	0.62322	0.806276	1.03752	1.29778	1.66716	2.13378	2.80092	3.88425	6.12631	8.82711	13.6223	19.6225	25.978	35.9668	48.1627
0.246094	0.454804	0.624549	0.807989	1.03832	1.29849	1.66806	2.13378	2.80429	3.89108	6.16709	8.94502	13.6579	19.6349	25.9976	35.9814	48.4936
0.246094	0.454974	0.62474	0.808581	1.0385	1.29887	1.66905	2.13378	2.8059	3.93955	6.16709	8.99011	13.7235	19.6725	26.0296	36.0215	48.6577
0.246094	0.455018	0.625128	0.808731	1.03963	1.30197	1.66917	2.14805	2.81419	3.95308	6.20225	9.0086	13.7284	19.6756	26.0692	36.0344	49.1368
0.246094	0.455172	0.625525	0.809753	1.03986	1.30209	1.6703	2.14832	2.82748	3.96776	6.2101	9.0253	13.8361	19.7064	26.077	36.0926	49.172
0.246094	0.455432	0.626139	0.812614	1.04057	1.30465	1.6843	2.14926	2.82817	3.99023	6.22098	9.0463	13.8873	19.717	26.0849	36.2372	49.2219
0.246094	0.456503	0.626236	0.814953	1.04169	1.30571	1.68439	2.15492	2.83462	4.00727	6.23612	9.15554	13.8928	19.7369	26.1027	36.3119	49.5225
0.246094	0.457587	0.626397	0.815	1.04394	1.30945	1.68565	2.1577	2.83514	4.00732	6.24566	9.16717	13.8928	19.7475	26.1452	36.3451	49.5852
0.246094	0.457807	0.627509	0.816134	1.04409	1.31634	1.68592	2.15841	2.8367	4.01632	6.27418	9.18826	13.8946	19.8136	26.1534	36.4573	49.6013
0.246094	0.457811	0.627881	0.816198	1.04409	1.31725	1.68778	2.16009	2.84397	4.01669	6.29998	9.20105	13.9418	19.8267	26.1839	36.4595	49.6408
0.246094	0.458092	0.628309	0.816338	1.04409	1.32057	1.69123	2.16123	2.85508	4.03624	6.30308	9.26105	13.9678	19.8788	26.2279	36.4847	49.6738
0.246094	0.458467	0.628617	0.816768	1.04409	1.32526	1.69133	2.16344	2.85573	4.04337	6.30394	9.30388	13.9701	19.8868	26.2353	36.6053	49.7209
0.246094	0.458494	0.628722	0.818766	1.04409	1.32526	1.69401	2.16366	2.85636	4.05868	6.3252	9.33153	13.9812	19.9028	26.2972	36.6314	49.7603
0.246094	0.458787	0.628815	0.819114	1.04409	1.32526	1.69506	2.16531	2.85793	4.05868	6.33748	9.3548	13.9841	19.9217	26.3317	36.6713	50.0904
0.246094	0.459071	0.629065	0.819609	1.04601	1.32526	1.69551	2.17102	2.85927	4.06325	6.34861	9.37351	14.0593	19.9341	26.3561	36.7122	50.1062
0.246094	0.459391	0.629591	0.820294	1.04618	1.32526	1.69586	2.17241	2.86715	4.06416	6.35585	9.40323	14.0812	19.9658	26.412	36.7352	50.2439
0.246094	0.460096	0.62983	0.821207	1.04733	1.32526	1.70205	2.1836	2.86992	4.06429	6.39844	9.42904	14.0963	19.9727	26.4488	36.7587	50.2532
0.246094	0.460425	0.630264	0.821575	1.04948	1.32526	1.70416	2.18877	2.86992	4.06492	6.40134	9.4517	14.122	19.989	26.4582	36.8489	50.2899
0.246094	0.460645	0.630592	0.821746	1.04948	1.32526	1.70768	2.20075	2.87169	4.07358	6.40902	9.49935	14.2247	20.0079	26.461	36.869	50.3014
0.246094	0.461401	0.630783	0.827724	1.05237	1.32526	1.70999	2.20113	2.87575	4.07358	6.41734	9.50805	14.2337	20.0152	26.4842	36.9532	50.3792
0.246094	0.46201	0.632709	0.827999	1.05237	1.32526	1.71455	2.20347	2.87951	4.07785	6.41734	9.55962	14.3264	20.0297	26.4976	37.0288	50.4549
0.246094	0.463995	0.632902	0.828175	1.05237	1.32526	1.71649	2.21415	2.88045	4.09175	6.41878	9.56092	14.3326	20.0328	26.5537	37.0974	50.5627
0.246094	0.464542	0.634354	0.829099	1.05372	1.32526	1.71707	2.21484	2.8815	4.10958	6.42013	9.56195	14.3392	20.0443	26.558	37.1308	50.5993
0.246094	0.464545	0.636376	0.829155	1.05402	1.32526	1.71859	2.21484	2.88636	4.11569	6.42265	9.56845	14.3421	20.0703	26.6191	37.2277	50.7194
0.246094	0.464858	0.636389	0.829917	1.0543	1.32526	1.71928	2.21484	2.89138	4.11862	6.42431	9.59766	14.3557	20.1279	26.6232	37.2372	50.7389
0.246094	0.464858	0.639234	0.830003	1.05694	1.3253	1.72121	2.21487	2.8927	4.18517	6.42745	9.60999	14.3727	20.1757	26.6392	37.2672	50.8185
0.246094	0.464909	0.641045	0.830074	1.05904	1.32563	1.72266	2.2186	2.90331	4.21897	6.43663	9.68559	14.4019	20.191	26.6726	37.2818	50.9128
0.246094	0.465381	0.641559	0.831998	1.05909	1.32702	1.72548	2.2186	2.91148	4.22392	6.45584	9.68559	14.4206	20.2336	26.7554	37.3048	51.0978
0.246094	0.466236	0.641852	0.832332	1.05911	1.32869	1.73273	2.22847	2.93315	4.23855	6.46625	9.73509	14.4697	20.2373	26.7749	37.3704	51.1296
0.246094	0.467381	0.642655	0.832485	1.06094	1.32934	1.73322	2.23242	2.93516	4.2391	6.46759	9.73549	14.4745	20.2559	26.8322	37.3755	51.2359
0.246094	0.467826	0.643679	0.832508	1.06122	1.33024	1.73633	2.23242	2.94477	4.25185	6.49016	9.76246	14.4947	20.3731	26.8789	37.4441	51.2692
0.246094	0.467844	0.645845	0.833243	1.07036	1.33085	1.73633	2.23242	2.94945	4.25532	6.49201	9.80677	14.5049	20.3776	26.8843	37.4598	51.742
0.246094	0.467906	0.646438	0.834161	1.07117	1.33389	1.74015	2.23242	2.96336	4.25964	6.49489	9.80849	14.5245	20.3942	26.9132	37.486	51.7488
0.246094	0.468168	0.64691	0.835278	1.07234	1.33577	1.74015	2.23242	2.96506	4.26333	6.52503	9.82619	14.5716	20.3946	26.9758	37.5477	51.8415
0.246094	0.468786	0.64787	0.83535	1.07259	1.33577	1.74015	2.23541	2.96832	4.26621	6.539	9.83394	14.5745	20.4199	26.9779	37.5759	51.9384
0.246094	0.468833	0.651158	0.837148	1.07328	1.33577	1.74015	2.24616	2.97656	4.28411	6.61166	9.85753	14.6172	20.42	27.0002	37.6695	51.9468
0.246094	0.469	0.65122	0.837377	1.0735	1.33577	1.74015	2.24654	2.98552	4.29784	6.63577	9.90231	14.6521	20.4317	27.0166	37.678	52.1635
0.246094	0.469017	0.651682	0.838055	1.07393	1.33577	1.74094	2.24744	2.98688	4.32524	6.63983	9.91637	14.6766	20.4905	27.0429	37.7025	52.187
0.246094	0.470503	0.652207	0.839271	1.07599	1.33577	1.74469	2.25204	2.9907	4.33905	6.64178	9.91722	14.6834	20.4983	27.0814	37.7358	52.3836
0.246094	0.470854	0.653938	0.839874	1.07642	1.33657	1.74479	2.26887	2.99716	4.34105	6.65113	9.93025	14.6949	20.5179	27.0941	37.7561	52.4418
0.246094	0.470975	0.655014	0.840021	1.07697	1.34038	1.74923	2.26969	2.99716	4.39329	6.66718	9.94863	14.7141	20.5455	27.1652	37.7618	52.4647
0.246094	0.47149	0.655052	0.840881	1.07713	1.34184	1.74979	2.27446	2.99716	4.40378	6.71561	9.95026	14.7249	20.5697	27.1744	37.8497	52.6839
0.246094	0.471522	0.656408	0.844969	1.07713	1.3467	1.75396	2.28176	3.01762	4.40695	6.72208	9.9564	14.7285	20.6287	27.1876	37.9081	52.774
0.246094	0.471732	0.656566	0.845538	1.07785	1.34778	1.75396	2.28688	3.01762	4.40977	6.73848	9.95998	14.7314	20.646	27.2246	37.9672	52.7967
0.246094	0.471895	0.658472	0.845588	1.07981	1.35025	1.75396	2.28688	3.0257	4.43652	6.74773	9.97132	14.7548	20.676	27.2592	38.0063	52.8363
0.246094	0.47215	0.659696	0.847472	1.0806	1.35049	1.75396	2.28688	3.02775	4.46817	6.76223	9.99429	14.756	20.7088	27.2643	38.0224	53.0061
0.246094	0.472499	0.66067	0.848379	1.08169	1.35133	1.75396	2.28688	3.03064	4.47173	6.77693	10.0102	14.7769	20.7638	27.2676	38.0983	53.0641
0.246094	0.473896	0.662684	0.852449	1.08547	1.3527	1.75396	2.29231	3.03256	4.49977	6.78806	10.0848	14.7984	20.7709	27.4307	38.1644	53.2139
0.246094	0.4739	0.664855	0.853243	1.08747	1.35377	1.75396	2.30072	3.03513	4.50359	6.80526	10.0928	14.846	20.7745	27.5141	38.165	53.2245
0.246094	0.474515	0.665593	0.853894	1.08947	1.354	1.75694	2.30695	3.03556	4.50851	6.80603	10.1314	14.8493	20.8123	27.546	38.1872	53.2528
0.246094	0.475802	0.665616	0.854493	1.09043	1.35544	1.76281	2.30923	3.04401	4.50909	6.80903	10.1334	14.8609	20.8178	27.5493	38.3351	53.277
0.246094	0.47622	0.667156	0.857175	1.09149	1.35753	1.76743	2.3155	3.04401	4.5318	6.83251	10.137	14.9034	20.8365	27.5952	38.3539	53.3405
0.246094	0.476356	0.667504	0.857323	1.09387	1.35807	1.76949	2.3215	3.04401	4.53774	6.83382	10.1495	14.9382	20.8498	27.7189	38.3686	53.5304
0.246094	0.476454	0.670214	0.857601	1.0964	1.36396	1.77031	2.32726	3.04718	4.54902	6.83769	10.2092	14.9803	20.8676	27.7614	38.371	53.5649
0.246094	0.476959	0.670618	0.858218	1.09716	1.36928	1.77461	2.32811	3.05194	4.55537	6.85297	10.2156	14.9928	20.9277	27.7956	38.4658	53.5743
0.246094	0.477131	0.670898	0.859399	1.0983	1.37237	1.77461	2.32874	3.05724	4.56029	6.86064	10.2232	14.9934	20.9594	27.8652	38.4928	53.6751
0.246094	0.477807	0.672097	0.859541	1.09863	1.37657	1.77596	2.33465	3.06817	4.56527	6.86127	10.235	15.0723	21.0169	27.939	38.4952	53.7117
0.246094	0.478037	0.67371	0.859849	1.09936	1.37699	1.77636	2.33684	3.07538	4.57046	6.86417	10.2475	15.1102	21.0228	28.0808	38.5042	53.9837
0.246094	0.478048	0.674283	0.861421	1.10056	1.37746	1.7802	2.34007	3.08281	4.57761	6.87969	10.2688	15.1387	21.0446	28.083	38.5297	54.0629
0.246094	0.478444	0.675107	0.861492	1.10056	1.37998	1.78296	2.34007	3.08667	4.59576	6.89447	10.275	15.148	21.0766	28.114	38.532	54.143
0.246094	0.478674	0.676493	0.862568	1.10056	1.38041	1.78686	2.34096	3.1049	4.6003	6.92171	10.2784	15.1551	21.0857	28.1303	38.5455	54.2043
0.246094	0.478737	0.676587	0.863517	1.10056	1.38819	1.78869	2.34221	3.11112	4.62662	6.92435	10.2917	15.1882	21.0879	28.1428	38.6635	54.2598
0.246094	0.478743	0.677329	0.863617	1.10056	1.39104	1.78869	2.34334	3.11287	4.6339	6.93471	10.3102	15.1977	21.0908	28.199	38.7076	54.3653
0.246508	0.478865	0.678641	0.865337	1.10056	1.39123	1.79119	2.34441	3.1224	4.64159	6.94974	10.3171	15.2175	21.1139	28.199	38.7223	54.5176
0.246621	0.478927	0.679216	0.865508	1.10056	1.39212	1.79159	2.34456	3.12698	4.64585	6.9502	10.3389	15.2909	21.1311	28.2215	38.727	54.6858
0.247787	0.480184	0.680201	0.866309	1.10056	1.39212	1.79788	2.34761	3.13944	4.67968	6.9618	10.3623	15.3067	21.1369	28.2355	38.7565	54.7246
0.248047	0.480301	0.680975	0.866329	1.10056	1.39212	1.8041	2.34762	3.14049	4.69314	6.99725	10.4089	15.3291	21.1397	28.2382	38.7817	54.9532
0.248047	0.480593	0.681114	0.867875	1.10056	1.39437	1.80581	2.35318	3.14055	4.70161	7.00392	10.4221	15.3974	21.1451	28.2728	38.7977	54.9784
0.248047	0.481958	0.681218	0.868018	1.10056	1.39819	1.80581	2.35318	3.14484	4.70454	7.02168	10.5131	15.4325	21.1639	28.2817	39.0215	55.0787
0.248047	0.484617	0.68201	0.868782	1.10056	1.39857	1.80679	2.35451	3.14553	4.70708	7.02228	10.5155	15.4545	21.2374	28.2893	39.0506	55.1461
0.248047	0.484749	0.682085	0.869735	1.10056	1.40317	1.81473	2.35647	3.14655	4.73893	7.02604	10.5447	15.4723	21.2646	28.2915	39.1098	55.2649
0.248047	0.484861	0.68248	0.870161	1.10056	1.40317	1.81587	2.36577	3.15032	4.74261	7.04851	10.5699	15.4964	21.2797	28.3129	39.2035	55.3257
0.248047	0.486269	0.683399	0.873414	1.10056	1.40398	1.81623	2.37531	3.16092	4.74267	7.05954	10.6021	15.5064	21.2815	28.3753	39.2176	55.3623
0.248047	0.486608	0.683462	0.874291	1.10465	1.40621	1.81646	2.3761	3.16171	4.74852	7.0673	10.6044	15.5215	21.3364	28.3967	39.2487	55.4566
0.248047	0.487055	0.683851	0.876758	1.10531	1.40667	1.82282	2.37629	3.19932	4.7635	7.07639	10.6291	15.536	21.3365	28.4119	39.2926	55.7071
0.248047	0.487076	0.684076	0.877622	1.10591	1.40923	1.82482	2.37993	3.2079	4.76482	7.08461	10.6453	15.5527	21.3612	28.4475	39.3902	56.0351
0.248047	0.487377	0.685347	0.878635	1.10615	1.41006	1.82747	2.38373	3.20867	4.7706	7.0998	10.6846	15.5698	21.3872	28.4653	39.3942	56.1469
0.248047	0.487449	0.685424	0.8793	1.1093	1.41429	1.82871	2.39012	3.20867	4.77128	7.10269	10.6919	15.6092	21.388	28.4805	39.4129	56.2722
0.248047	0.488208	0.685576	0.879534	1.1093	1.41431	1.83259	2.41458	3.21299	4.77828	7.13485	10.7775	15.625	21.4102	28.4898	39.5972	56.3198
0.248047	0.488449	0.685723	0.880738	1.1093	1.41452	1.83446	2.42374	3.21839	4.78201	7.13609	10.7793	15.6613	21.4137	28.534	39.6663	56.5327
0.248047	0.489419	0.689689	0.88201	1.1093	1.41875	1.83949	2.4362	3.22211	4.78399	7.13854	10.7942	15.6859	21.4256	28.5341	39.7688	56.6726
0.248047	0.48953	0.690728	0.882654	1.10968	1.42344	1.84636	2.43842	3.22461	4.82654	7.1428	10.8565	15.6961	21.4643	28.5724	39.7795	56.7182
0.248047	0.490387	0.690983	0.885051	1.112	1.42601	1.85081	2.43928	3.22461	4.84826	7.15367	10.8695	15.7042	21.4676	28.6411	39.7932	57.115
0.248047	0.490541	0.691103	0.885179	1.11353	1.42814	1.8557	2.43938	3.22461	4.85064	7.16577	10.8805	15.7189	21.47	28.6697	39.8268	57.3832
0.248047	0.490674	0.692025	0.88601	1.11458	1.43049	1.85651	2.45878	3.25037	4.85913	7.20429	10.8814	15.7391	21.5666	28.6899	39.8414	58.1662
0.248047	0.491171	0.69312	0.886173	1.11507	1.43129	1.85668	2.46741	3.25134	4.87241	7.23738	10.8828	15.7519	21.5736	28.6948	39.844	58.4901
0.248047	0.491257	0.693669	0.886751	1.1173	1.43156	1.85703	2.46933	3.26847	4.87582	7.24039	10.8861	15.7577	21.5744	28.7101	39.8484	58.4923
0.248047	0.491382	0.695099	0.887304	1.1176	1.43496	1.85933	2.47157	3.26946	4.88442	7.25036	10.8946	15.7664	21.581	28.7266	39.8668	58.5885
0.248047	0.492188	0.696058	0.887304	1.11809	1.43496	1.86255	2.48047	3.27395	4.90338	7.25659	10.908	15.7747	21.5912	28.7655	39.9234	59.2176
0.248047	0.492188	0.696058	0.887304	1.12182	1.43496	1.86386	2.48047	3.2762	4.91721	7.27323	10.9301	15.7774	21.5915	28.8325	39.9736	59.223
0.248047	0.492188	0.696058	0.887304	1.12218	1.43496	1.87049	2.48047	3.27793	4.91956	7.27326	10.965	15.7827	21.5967	28.8394	40.0547	59.6099
0.248047	0.492188	0.696058	0.887304	1.12402	1.43496	1.87231	2.48047	3.2781	4.93563	7.28657	10.967	15.8031	21.6145	28.8628	40.1095	59.632
0.248047	0.492188	0.696058	0.887304	1.12616	1.43496	1.87419	2.48047	3.27924	4.93684	7.28856	10.9934	15.817	21.6768	28.9221	40.1433	59.7729
0.248047	0.492188	0.696058	0.887304	1.12796	1.43496	1.87419	2.48188	3.2833	4.9423	7.29356	11.0059	15.8355	21.6808	28.9273	40.1485	61.5001
0.248047	0.492188	0.696058	0.887304	1.13133	1.43496	1.87419	2.49284	3.2833	4.94569	7.29528	11.016	15.8395	21.6976	28.9564	40.259	61.5861
0.248047	0.492188	0.696058	0.887304	1.13207	1.43931	1.87419	2.49284	3.30006	4.95969	7.30873	11.0194	15.8398	21.7313	28.9753	40.2903	62.3205
0.248047	0.492188	0.696058	0.887304	1.13482	1.43948	1.87459	2.49284	3.305	4.9705	7.31578	11.0416	15.9262	21.8185	28.9837	40.4775	62.3552
0.248047	0.492188	0.696058	0.887304	1.13656	1.44128	1.87467	2.49812	3.30616	4.97436	7.31817	11.0429	16.0009	21.8241	29.0279	40.5339	62.4363
0.248047	0.492188	0.696058	0.887304	1.1375	1.44635	1.87819	2.4997	3.30936	4.97962	7.32507	11.0479	16.0031	21.8242	29.0384	40.5727	63.0404
0.248047	0.492188	0.696058	0.887304	1.13815	1.44635	1.87942	2.50775	3.31042	4.98955	7.34898	11.077	16.0389	21.8699	29.1141	40.6496	63.2538
0.248047	0.492188	0.696058	0.887304	1.1399	1.44635	1.87948	2.50967	3.32064	5.02973	7.3518	11.0774	16.049	21.8747	29.1477	40.7246	63.5346
0.248047	0.492188	0.696058	0.887304	1.14341	1.44635	1.88012	2.50967	3.3279	5.04313	7.35643	11.0833	16.054	21.901	29.176	40.796	63.7744
0.248047	0.492188	0.696058	0.887304	1.14466	1.44658	1.88137	2.51652	3.33023	5.04942	7.36013	11.0852	16.0587	21.9101	29.1814	40.8186	63.9489
0.248047	0.492188	0.696058	0.887304	1.14691	1.44689	1.88435	2.52565	3.33379	5.06738	7.36662	11.093	16.1224	21.953	29.2328	40.8224	64.1728
0.248047	0.492188	0.696058	0.887435	1.14819	1.45061	1.8854	2.52959	3.34571	5.07335	7.3746	11.0956	16.1843	21.9723	29.2446	40.8437	64.5055
0.248047	0.492188	0.696058	0.889848	1.15122	1.45263	1.88907	2.53036	3.34724	5.07335	7.391	11.1206	16.1918	21.9989	29.2614	40.8495	65.1812
0.248047	0.492188	0.696058	0.889936	1.15565	1.45331	1.88952	2.53369	3.35924	5.07335	7.41012	11.1288	16.2645	22.0244	29.2706	40.8803	65.4193
0.248047	0.492188	0.696058	0.89392	1.1563	1.45619	1.89241	2.53864	3.3738	5.07719	7.4351	11.1464	16.2718	22.0625	29.2807	40.9167	65.6492
0.248047	0.492188	0.696058	0.894346	1.15642	1.45652	1.89282	2.54704	3.3738	5.08548	7.46706	11.1483	16.3231	22.096	29.321	40.9345	65.852
0.248047	0.492188	0.696058	0.894346	1.15808	1.45666	1.89755	2.54753	3.3759	5.0859	7.4879	11.156	16.4063	22.1348	29.3384	40.9835	65.9478
0.248047	0.492188	0.696253	0.894346	1.15886	1.457	1.89952	2.5538	3.37936	5.10308	7.49678	11.1591	16.421	22.153	29.3465	40.9953	66.2285
0.248047	0.492188	0.69724	0.894346	1.15927	1.45737	1.89969	2.55639	3.38259	5.11072	7.49693	11.167	16.4605	22.1679	29.3589	41.0033	66.4216
0.248047	0.492188	0.697761	0.894346	1.16076	1.45793	1.90153	2.55643	3.38757	5.11362	7.51986	11.1869	16.5052	22.1682	29.3593	41.0216	66.4437
0.248047	0.492188	0.700696	0.894346	1.16159	1.46128	1.90813	2.55663	3.39035	5.12986	7.52902	11.2236	16.5267	22.1772	29.3843	41.1486	66.7476
0.248047	0.492188	0.701583	0.894773	1.16297	1.4639	1.91536	2.56321	3.39617	5.13151	7.57163	11.2522	16.5927	22.1786	29.4012	41.1496	67.0189
0.248047	0.492188	0.701583	0.896287	1.16416	1.46556	1.91738	2.5639	3.39663	5.13401	7.58475	11.2554	16.6085	22.1822	29.4292	41.2019	67.6461
0.248047	0.492188	0.701583	0.896439	1.16531	1.47043	1.92205	2.56929	3.40705	5.16258	7.58719	11.3062	16.6571	22.1826	29.4564	41.2158	67.7965
0.248047	0.492188	0.701583	0.897013	1.16685	1.47138	1.92205	2.56929	3.40792	5.16816	7.59059	11.3123	16.7016	22.186	29.5825	41.2394	67.8423
0.248047	0.492188	0.701583	0.897034	1.16732	1.47276	1.92205	2.5821	3.40977	5.17382	7.59868	11.3154	16.7032	22.226	29.5909	41.272	68.4249
0.248047	0.492188	0.701583	0.89942	1.16797	1.47294	1.92205	2.58299	3.4126	5.17886	7.60107	11.323	16.7475	22.316	29.5939	41.2743	68.5335
0.248047	0.492188	0.701583	0.899691	1.16908	1.47471	1.92483	2.58386	3.41777	5.20159	7.60107	11.3344	16.7626	22.3256	29.603	41.482	69.0243
0.248047	0.492188	0.703417	0.900996	1.16983	1.47577	1.92836	2.59938	3.42812	5.21754	7.61498	11.3672	16.7994	22.3311	29.6109	41.7309	69.1949
0.248047	0.492188	0.704766	0.902535	1.17037	1.47653	1.93689	2.60899	3.43751	5.23625	7.63287	11.3808	16.8143	22.3393	29.6532	41.7853	69.4582
0.248047	0.492188	0.705732	0.903571	1.17038	1.47656	1.93731	2.61601	3.44598	5.29217	7.66455	11.382	16.8498	22.3916	29.6932	41.8103	69.765
0.248047	0.492188	0.705898	0.908271	1.17186	1.47656	1.94087	2.62174	3.44768	5.31181	7.72544	11.4371	16.8685	22.4153	29.6986	41.8937	69.966
0.248087	0.492188	0.706688	0.909052	1.1753	1.47711	1.94427	2.62752	3.46412	5.31944	7.72589	11.4459	16.8807	22.4178	29.7257	41.9441	70.0002
0.24822	0.492188	0.706889	0.911469	1.17541	1.47712	1.94634	2.63927	3.48615	5.33362	7.7275	11.4625	16.8821	22.4294	29.7601	41.9769	70.6443
0.248642	0.492188	0.707829	0.916046	1.1756	1.48079	1.94723	2.64006	3.5019	5.36822	7.7275	11.5527	16.9897	22.4501	29.8821	41.9837	70.9227
0.249065	0.492188	0.708162	0.916419	1.17575	1.48266	1.95061	2.64578	3.50728	5.37981	7.78488	11.5682	16.9929	22.4696	29.9877	42.0286	71.884
0.249423	0.492188	0.708557	0.920267	1.17609	1.48532	1.95344	2.64735	3.5187	5.42196	7.80187	11.569	16.9965	22.5399	30.0229	42.0472	72.0887
0.249958	0.492188	0.708806	0.921339	1.17628	1.48753	1.96304	2.64925	3.52227	5.44009	7.82098	11.5899	17.0322	22.5641	30.0675	42.059	72.1307
0.249962	0.492188	0.708811	0.922492	1.17678	1.48828	1.96373	2.64975	3.52416	5.46417	7.82353	11.6082	17.0868	22.6219	30.0698	42.0876	72.2682
0.250243	0.492188	0.709661	0.92317	1.17875	1.48828	1.96461	2.65051	3.5299	5.46417	7.82629	11.6227	17.1019	22.642	30.0718	42.1285	72.8267
0.250308	0.492188	0.711026	0.924246	1.17883	1.48828	1.96875	2.66569	3.53794	5.50282	7.85317	11.6533	17.1297	22.6463	30.0802	42.1857	72.9721
0.250573	0.492188	0.711049	0.924332	1.17954	1.48828	1.96875	2.66706	3.53903	5.51302	7.87341	11.6536	17.142	22.6536	30.1205	42.2728	73.2237
0.250975	0.492188	0.711394	0.925268	1.1797	1.48828	1.97144	2.67155	3.55149	5.5202	7.87884	11.7003	17.1702	22.7184	30.2376	42.2824	73.9438
0.251346	0.492188	0.713427	0.925544	1.18001	1.48923	1.9775	2.67372	3.55149	5.53027	7.89008	11.7141	17.2161	22.7406	30.2899	42.3013	73.9662
0.251365	0.492188	0.714142	0.925969	1.18114	1.49254	1.97776	2.68971	3.55149	5.53027	7.92455	11.7388	17.235	22.7655	30.3115	42.453	74.3824
0.251453	0.492188	0.715005	0.926149	1.18435	1.49269	1.98015	2.71062	3.55149	5.54941	7.93179	11.7444	17.2586	22.788	30.3613	42.6943	74.6757
0.251457	0.492188	0.716248	0.926427	1.18691	1.49562	1.98089	2.71456	3.5627	5.57248	7.95393	11.7759	17.2618	22.7912	30.3903	42.7305	74.6868
0.251748	0.492188	0.7174	0.927994	1.18769	1.49693	1.98407	2.71723	3.57243	5.57416	7.95828	11.7815	17.2693	22.8014	30.4011	42.7688	74.9598
0.252057	0.492188	0.717559	0.930845	1.18964	1.49693	1.98407	2.72091	3.59071	5.57773	7.99618	11.7862	17.2792	22.8014	30.4105	42.7803	75.0472
0.252131	0.492188	0.717977	0.931041	1.19	1.49693	1.98438	2.72164	3.59805	5.58243	8.03191	11.7947	17.3088	22.8126	30.6847	42.8535	75.3091
0.252697	0.492188	0.71974	0.931108	1.19172	1.49693	1.98438	2.72501	3.602	5.5876	8.0365	11.8253	17.3344	22.8295	30.6874	42.9918	75.7025
0.252792	0.492188	0.720804	0.931931	1.1921	1.49693	1.98438	2.72852	3.60768	5.59619	8.0465	11.8617	17.4175	22.8688	30.7068	43.0052	76.4524
0.253108	0.492188	0.721297	0.934157	1.19749	1.49693	1.98438	2.72852	3.61162	5.59619	8.10163	11.8764	17.4181	22.8813	30.7095	43.0092	76.7397
0.25327	0.492188	0.721707	0.93553	1.19794	1.49693	1.98438	2.72852	3.61162	5.61346	8.12682	11.9123	17.4355	22.8845	30.7668	43.046	76.9493
0.253314	0.492188	0.72369	0.935725	1.19954	1.49693	1.98596	2.72852	3.61162	5.61719	8.17344	11.9256	17.4449	22.8861	30.8536	43.1031	76.9782
0.253386	0.492188	0.723847	0.937732	1.19999	1.50108	1.98864	2.72852	3.61666	5.6496	8.18054	12.0189	17.5273	22.888	30.8583	43.2996	77.9503
0.25349	0.492188	0.724557	0.93837	1.20014	1.50114	1.9904	2.73687	3.62445	5.66616	8.18324	12.0209	17.5285	22.9547	30.8808	43.4003	78.3004
0.253919	0.492188	0.725221	0.939915	1.2015	1.50398	1.99736	2.73787	3.63353	5.66916	8.204	12.0507	17.5396	22.9733	30.9486	43.4758	78.3568
0.253926	0.492188	0.726386	0.940157	1.20307	1.50427	1.99982	2.74382	3.64463	5.68152	8.21473	12.0523	17.5832	22.9851	31.0069	43.4896	78.7313
0.253991	0.492188	0.727345	0.940901	1.20384	1.50629	1.99982	2.74708	3.65483	5.69657	8.25665	12.0586	17.597	23.0136	31.0655	43.692	79.0096
0.254318	0.492188	0.727782	0.94125	1.20949	1.50881	1.99982	2.75141	3.66264	5.69995	8.27564	12.0686	17.6166	23.0684	31.1028	43.7699	80.2495
0.254385	0.492693	0.727923	0.942511	1.21222	1.50881	1.99982	2.75589	3.66285	5.70749	8.31718	12.0959	17.6198	23.0697	31.1336	43.934	80.797
0.254655	0.493102	0.730427	0.945215	1.21289	1.50898	1.99982	2.76152	3.67472	5.72399	8.32206	12.0985	17.6234	23.1163	31.1467	44.0109	81.3136
0.255011	0.49529	0.730591	0.945368	1.21346	1.51057	1.99982	2.76564	3.67478	5.73984	8.33427	12.1019	17.6368	23.2013	31.1542	44.0125	82.0011
0.255426	0.495481	0.730677	0.946139	1.21516	1.51259	1.99982	2.77325	3.67556	5.74599	8.35632	12.109	17.6645	23.2066	31.2114	44.0139	83.0686
0.255429	0.495976	0.730708	0.947635	1.21905	1.51392	2.003	2.77325	3.68237	5.75358	8.36173	12.1581	17.6853	23.2167	31.276	44.0712
0.255588	0.496094	0.732005	0.94812	1.21937	1.51393	2.00394	2.77325	3.72068	5.76711	8.37081	12.1619	17.6961	23.2333	31.2854	44.1039
0.255962	0.496094	0.732449	0.951155	1.22474	1.516	2.01273	2.77325	3.74839	5.77099	8.37358	12.177	17.7205	23.2797	31.3643	44.2498
0.256073	0.496094	0.73444	0.952645	1.22579	1.51654	2.01293	2.77325	3.7755	5.77637	8.38287	12.1853	17.7205	23.2974	31.4485	44.2921
0.256449	0.496094	0.735891	0.954114	1.22689	1.51718	2.01644	2.77325	3.77894	5.77846	8.39461	12.2027	17.7461	23.3121	31.4534	44.3053
0.256657	0.496094	0.736862	0.955513	1.23036	1.52861	2.02197	2.77325	3.79106	5.78269	8.43724	12.206	17.7614	23.3283	31.5039	44.3736
0.257027	0.496094	0.737278	0.955754	1.23047	1.53217	2.0263	2.77325	3.79439	5.78443	8.44205	12.206	17.7741	23.3903	31.5371	44.5734
0.257033	0.496094	0.738281	0.956127	1.23047	1.53327	2.02934	2.77756	3.8073	5.7854	8.4548	12.2381	17.7802	23.3924	31.5674	44.6822
0.257048	0.496094	0.738281	0.956455	1.23047	1.54257	2.03811	2.7786	3.8204	5.79071	8.47231	12.2428	17.7814	23.3978	31.6127	44.7227
0.257395	0.496094	0.738281	0.958745	1.23047	1.54985	2.04121	2.78305	3.8204	5.79236	8.48577	12.248	17.8135	23.4323	31.6245	44.794
0.257984	0.496094	0.738281	0.962083	1.23047	1.55425	2.04168	2.78532	3.8204	5.81838	8.48577	12.3134	17.8416	23.4379	31.6462	44.8865
0.257992	0.496094	0.738281	0.963313	1.23047	1.5546	2.04319	2.78878	3.82507	5.81966	8.48577	12.3162	17.8869	23.4637	31.7729	45.2289
0.258148	0.496094	0.738281	0.963944	1.23047	1.55596	2.04545	2.79431	3.84088	5.86435	8.5147	12.4334	17.898	23.489	31.8542	45.2894
0.258576	0.496094	0.738281	0.965532	1.23047	1.55643	2.05752	2.8059	3.87562	5.88758	8.56376	12.4438	17.8988	23.5068	31.8646	45.4785
0.258768	0.496094	0.738281	0.966409	1.23047	1.55643	2.06321	2.8059	3.88255	5.9279	8.57211	12.4612	17.899	23.5174	31.8794	45.6561
0.259011	0.496094	0.738281	0.969841	1.23047	1.55814	2.06867	2.8059	3.88255	5.94712	8.58127	12.4642	17.9309	23.5383	31.9164	45.7282
0.259544	0.496094	0.738281	0.97042	1.23047	1.55827	2.07102	2.80681	3.88271	5.95312	8.59661	12.4758	17.9374	23.584	31.9463	45.7376
0.259707	0.496094	0.738281	0.970602	1.23678	1.56161	2.08648	2.80728	3.8882	5.97136	8.61019	12.5155	17.9421	23.6529	31.9476	45.7594
0.259963	0.496094	0.738281	0.970792	1.23708	1.56627	2.09084	2.8098	3.89108	5.97376	8.61038	12.5304	17.9488	23.6893	31.9524	45.8463
0.260322	0.496094	0.738281	0.973549	1.24023	1.56879	2.09765	2.82817	3.89108	6.00679	8.6168	12.5604	17.981	23.708	31.988	45.8808
0.26087	0.496094	0.738281	0.974938	1.24023	1.57158	2.09796	2.83066	3.89249	6.01651	8.63697	12.6095	17.9966	23.7159	31.994	45.9121
0.260884	0.496094	0.738281	0.976029	1.24023	1.57546	2.09845	2.8401	3.9048	6.05641	8.64489	12.6158	17.9979	23.7392	32.0284	46.0873
0.261077	0.496094	0.738281	0.976312	1.24023	1.57559	2.09889	2.84371	3.90664	6.05989	8.65751	12.6374	18.0222	23.8241	32.0536	46.0991
0.261133	0.496381	0.738281	0.978701	1.24023	1.57577	2.09943	2.84527	3.9174	6.09442	8.70073	12.6555	18.0254	23.8355	32.0872	46.108
0.261866	0.500048	0.738281	0.979542	1.24023	1.57577	2.09979	2.84691	3.92197	6.10632	8.7189	12.7135	18.0254	23.8894	32.1169	46.2144
0.261877	0.500579	0.738281	0.984375	1.24023	1.57577	2.10475	2.86081	3.93337	6.1081	8.75568	12.7409	18.0586	23.8897	32.1203	46.2493
0.262012	0.501769	0.738281	0.984375	1.24023	1.57577	2.11326	2.86478	3.94403	6.12513	8.76232	12.7475	18.0693	23.9082	32.1362	46.2513
0.2622	0.502994	0.738281	0.984375	1.24023	1.57577	2.11416	2.87088	3.96494	6.13538	8.76728	12.8034	18.0924	23.9321	32.148	46.3029
0.262666	0.503062	0.738281	0.984375	1.24023	1.57577	2.12785	2.87102	4.01205	6.16709	8.81262	12.8051	18.099	23.9949	32.2206	46.337
0.26287	0.503874	0.738281	0.984375	1.24023	1.57577	2.13126	2.87921	4.02581	6.18201	8.83043	12.8274	18.1018	24.0115	32.2923	46.6056
0.263047	0.504789	0.738281	0.984375	1.24023	1.57577	2.13378	2.87931	4.03286	6.20117	8.84194	12.8304	18.1059	24.0311	32.2983	46.6161
0.263373	0.505627	0.738281	0.984375	1.24023	1.57577	2.13378	2.88045	4.05577	6.20117	8.85704	12.8437	18.1915	24.0982	32.4487	46.6492
0.263738	0.506007	0.738281	0.984375	1.24023	1.57881	2.13378	2.88045	4.05868	6.20267	8.86792	12.9123	18.2041	24.1385	32.4525	46.7093
0.264573	0.506055	0.738281	0.984375	1.24039	1.58428	2.13378	2.88558	4.07131	6.20938	8.87439	12.929	18.2375	24.1472	32.46	46.7786
0.264909	0.506859	0.738472	0.984375	1.24193	1.58805	2.14415	2.89229	4.08469	6.21108	8.87779	12.9455	18.2375	24.1485	32.46	47.1304
0.264958	0.507004	0.738489	0.984375	1.24327	1.58827	2.14439	2.8927	4.09194	6.22098	8.88073	12.9529	18.2814	24.1759	32.489	47.1484
0.264972	0.507253	0.738502	0.984375	1.24388	1.58827	2.15511	2.89528	4.09819	6.22733	8.89509	12.9677	18.3655	24.1834	32.4979	47.22
0.265117	0.507625	0.73921	0.984375	1.244	1.58827	2.1565	2.90078	4.09989	6.24068	8.8962	12.985	18.3678	24.1919	32.5178	47.2267
0.265215	0.508059	0.739335	0.984375	1.24404	1.58926	2.16112	2.90331	4.10591	6.26219	8.92416	12.9874	18.4057	24.2037	32.5492	47.3371
0.26537	0.508432	0.74005	0.984375	1.24569	1.5946	2.1679	2.90613	4.11583	6.27063	8.94282	12.9897	18.4305	24.2087	32.6129	47.3873
0.265854	0.512229	0.741438	0.985398	1.24629	1.596	2.17487	2.90759	4.13177	6.27418	9.02866	13.0145	18.4658	24.2386	32.6176	47.4142
0.266869	0.512318	0.744141	0.986482	1.24757	1.59666	2.17818	2.93065	4.14254	6.27648	9.07544	13.0487	18.4917	24.2418	32.6291	47.6498
0.266964	0.512362	0.744141	0.987069	1.25111	1.59901	2.18891	2.9434	4.15003	6.28005	9.07549	13.0777	18.5242	24.3099	32.6721	47.7675
0.267636	0.512383	0.744141	0.989675	1.25238	1.59905	2.18966	2.94565	4.1661	6.28795	9.07831	13.0902	18.5447	24.3116	32.695	47.841
0.26775	0.512553	0.744141	0.990543	1.25242	1.59983	2.19461	2.94601	4.17327	6.28865	9.10879	13.1131	18.5569	24.3404	32.7881	47.9116
0.26788	0.513018	0.744141	0.991817	1.2539	1.60386	2.19641	2.95243	4.21226	6.29247	9.11092	13.1644	18.5617	24.3454	32.8302	48.0023
0.268419	0.513259	0.744141	0.992186	1.25484	1.6079	2.19994	2.95661	4.2287	6.30308	9.1228	13.1874	18.5857	24.3705	32.871	48.1831
0.268732	0.513861	0.744141	0.992188	1.25484	1.61226	2.20023	2.95925	4.23396	6.30788	9.14709	13.2032	18.5894	24.4134	32.901	48.2392
0.268902	0.514133	0.744141	0.992188	1.25484	1.61705	2.20113	2.96336	4.23396	6.31585	9.17556	13.2068	18.6224	24.4174	32.9075	48.2421
0.269226	0.515074	0.744141	0.992188	1.25484	1.61735	2.20596	2.96939	4.24993	6.33379	9.17651	13.287	18.6277	24.4612	32.9764	48.3587
0.269531	0.51508	0.744141	0.992188	1.25484	1.61941	2.20647	2.97041	4.26685	6.33663	9.17701	13.3558	18.6676	24.563	32.9802	48.3741
0.269749	0.515801	0.744141	0.992188	1.25484	1.62258	2.20836	2.97316	4.30221	6.35016	9.19631	13.3558	18.6843	24.5927	33.0276	48.718
0.270162	0.516299	0.744141	0.992188	1.25484	1.62343	2.21205	2.97786	4.33195	6.35508	9.19764	13.3822	18.6943	24.6047	33.0765	48.8172
0.270532	0.51644	0.7442	0.992188	1.25484	1.62419	2.21425	2.98173	4.33321	6.36817	9.23121	13.3889	18.7396	24.6874	33.134	48.8209
0.270603	0.517131	0.745054	0.992188	1.25484	1.62454	2.21484	2.99318	4.35384	6.37653	9.24117	13.4169	18.7682	24.7364	33.1387	48.9426
0.271731	0.517716	0.745496	0.993856	1.25484	1.62544	2.2169	2.99504	4.36079	6.38258	9.33417	13.4291	18.7878	24.7712	33.1642	49.14
0.271766	0.517886	0.747054	0.994087	1.25484	1.62921	2.2186	2.99716	4.36875	6.38424	9.34974	13.4476	18.8074	24.8173	33.1651	49.184
0.272313	0.518009	0.74726	0.994788	1.25484	1.63131	2.22037	2.99716	4.36914	6.38897	9.3548	13.4841	18.8355	24.8403	33.1663	49.2696
0.272335	0.518735	0.749163	0.994952	1.25484	1.6324	2.22292	3.00396	4.37031	6.41	9.38066	13.5106	18.8418	24.8587	33.1737	49.4466
0.272573	0.519463	0.750048	0.997354	1.25562	1.63307	2.22702	3.00396	4.41805	6.41233	9.40485	13.544	18.8843	24.8997	33.2098	49.5722
0.273294	0.519797	0.750055	0.998959	1.2564	1.63596	2.23242	3.00522	4.41908	6.41976	9.41102	13.5581	18.8962	24.9266	33.2392	49.595
0.273328	0.520021	0.750668	0.999218	1.26018	1.63844	2.23242	3.01225	4.4219	6.42586	9.43217	13.5768	18.898	24.9522	33.2604	49.6323
0.274271	0.520144	0.751352	0.999943	1.26028	1.64172	2.23242	3.0278	4.43652	6.43169	9.44169	13.5812	18.92	24.9753	33.2836	49.6893
0.274322	0.520282	0.751915	1.00003	1.26188	1.64492	2.23242	3.02814	4.45668	6.43433	9.44405	13.589	18.9252	25.0125	33.3015	49.7011
0.275018	0.520373	0.752964	1.00007	1.26305	1.64561	2.23242	3.02943	4.45734	6.44139	9.45004	13.6223	18.9274	25.0368	33.3424	49.7057
0.275234	0.520876	0.753441	1.00072	1.26416	1.65065	2.23242	3.03033	4.47173	6.44806	9.46283	13.6244	18.9348	25.0417	33.4019	49.7286
0.275433	0.521461	0.753734	1.00151	1.2648	1.65505	2.23242	3.03037	4.47465	6.46827	9.48017	13.6313	18.9393	25.0576	33.666	49.7697
0.275654	0.522129	0.754289	1.00185	1.2648	1.65793	2.23242	3.03432	4.48543	6.48183	9.48477	13.639	18.9557	25.0672	33.6833	49.8166
0.275907	0.522909	0.754982	1.0025	1.2648	1.65826	2.23242	3.04148	4.48769	6.48427	9.49349	13.7284	18.9572	25.0707	33.7134	49.8606
0.276118	0.52501	0.75513	1.00278	1.2648	1.66395	2.23303	3.04326	4.48922	6.50084	9.50808	13.7483	18.9656	25.0823	33.7939	49.8673
0.276504	0.525075	0.755672	1.00312	1.26572	1.66669	2.23867	3.04401	4.49277	6.50795	9.53254	13.7526	18.9946	25.1128	33.8663	49.9881
0.276653	0.525465	0.757418	1.00339	1.26669	1.66851	2.24084	3.05089	4.50362	6.50868	9.54903	13.7769	18.9946	25.1801	33.9138	50.0949
0.276821	0.526485	0.758061	1.00761	1.26823	1.6719	2.24504	3.05158	4.5134	6.51343	9.60902	13.7852	18.9954	25.1991	33.9426	50.3089
0.277807	0.526987	0.758199	1.00828	1.27286	1.6721	2.24584	3.0524	4.5169	6.53614	9.63449	13.7987	19.0078	25.2109	33.9543	50.4969
0.277841	0.528367	0.758243	1.01016	1.27354	1.67231	2.24616	3.05599	4.5237	6.54863	9.65154	13.8059	19.0404	25.2124	33.9562	50.5022
0.277857	0.528743	0.75966	1.0104	1.27392	1.67379	2.25047	3.0607	4.52438	6.57374	9.65841	13.8223	19.0549	25.2542	34.0728	50.5827
0.278304	0.529609	0.759772	1.0106	1.27404	1.67462	2.25271	3.06413	4.5327	6.58254	9.66598	13.8334	19.0662	25.261	34.0789	50.607
0.279114	0.530046	0.76083	1.01092	1.27439	1.67787	2.25374	3.065	4.53774	6.6026	9.67275	13.8381	19.0906	25.2976	34.1254	50.6611
0.279373	0.531248	0.763358	1.01105	1.275	1.68657	2.26682	3.06934	4.55979	6.61124	9.68559	13.895	19.1575	25.3541	34.1525	50.7247
0.2801	0.531444	0.764521	1.01117	1.27783	1.68845	2.26887	3.07823	4.56029	6.6163	9.68559	13.9505	19.1653	25.3542	34.1594	50.8296
0.280987	0.531694	0.765232	1.01197	1.28019	1.6897	2.27622	3.0783	4.56872	6.62628	9.77578	13.9564	19.1976	25.36	34.2345	50.9107
0.281192	0.531721	0.766075	1.01336	1.28242	1.68999	2.28688	3.08355	4.57159	6.62915	9.78094	13.9691	19.2095	25.4399	34.2521	51.0181
0.28135	0.53351	0.766803	1.01374	1.28437	1.6916	2.28688	3.08394	4.58619	6.63086	9.79027	14.0019	19.2164	25.4753	34.2848	51.0959
0.281485	0.534143	0.766807	1.0139	1.28533	1.69389	2.28688	3.10949	4.60952	6.63158	9.80059	14.0048	19.2168	25.5308	34.3061	51.1777
0.281568	0.534381	0.767024	1.01456	1.28646	1.69792	2.28698	3.11287	4.61809	6.66083	9.80677	14.0133	19.2347	25.5488	34.4174	51.2347
0.281622	0.535103	0.767242	1.01467	1.28719	1.70127	2.28824	3.11287	4.64014	6.66274	9.84683	14.0305	19.2595	25.556	34.4432	51.2744
0.281893	0.53537	0.767355	1.01467	1.29305	1.70448	2.2904	3.11651	4.64329	6.66274	9.8644	14.036	19.2708	25.5575	34.4967	51.2804
0.282017	0.535444	0.767492	1.01467	1.30153	1.7046	2.29887	3.12077	4.64441	6.67746	9.90814	14.0468	19.2745	25.6209	34.6174	51.3079
0.282097	0.536292	0.767742	1.01467	1.30191	1.70729	2.30254	3.12378	4.65392	6.70026	9.90836	14.0679	19.309	25.6483	34.6401	51.3307
0.282191	0.536822	0.767826	1.01467	1.31213	1.70968	2.31275	3.12393	4.6566	6.71458	9.92036	14.0895	19.3305	25.6929	34.654	51.451
0.282329	0.536869	0.768596	1.01467	1.31325	1.7133	2.32044	3.13242	4.66015	6.73848	9.9234	14.0963	19.3343	25.6953	34.7559	51.5761
0.283703	0.537036	0.768707	1.01467	1.31714	1.71427	2.32464	3.13537	4.66023	6.7575	9.92478	14.0974	19.3445	25.7261	34.7779	51.7563
0.283971	0.537274	0.769352	1.01467	1.32132	1.71449	2.34007	3.13757	4.66038	6.76978	9.94047	14.1045	19.4108	25.736	34.8336	51.7794
0.284029	0.540531	0.769383	1.01467	1.32415	1.71632	2.34008	3.14049	4.66594	6.79042	9.95388	14.1595	19.4337	25.7392	34.8984	51.9041
0.284137	0.540537	0.772047	1.01467	1.32526	1.71742	2.34336	3.14515	4.6801	6.79328	9.9564	14.1648	19.4738	25.8016	34.9268	52.0952
0.284816	0.540623	0.772407	1.01467	1.32526	1.71771	2.35105	3.14698	4.68225	6.80345	9.96634	14.1999	19.4826	25.8656	34.9473	52.2709
0.284973	0.540898	0.772514	1.01467	1.32526	1.72132	2.36195	3.15095	4.6823	6.81831	9.97211	14.2862	19.4887	25.8852	35.0042	52.442
0.285252	0.54095	0.772991	1.01467	1.32526	1.7222	2.36306	3.1514	4.68874	6.83008	9.97211	14.3084	19.5026	25.8891	35.0094	52.4436
0.285473	0.54148	0.774187	1.01467	1.32526	1.72266	2.37105	3.15154	4.69916	6.83516	10.0004	14.3369	19.5076	25.9334	35.0368	52.4531
0.287032	0.542048	0.774364	1.01467	1.32526	1.72333	2.373	3.15624	4.70057	6.83769	10.0261	14.348	19.517	25.9856	35.0449	52.4878
0.287091	0.542138	0.775386	1.01467	1.32526	1.72342	2.37569	3.16533	4.71441	6.85104	10.0276	14.3537	19.5354	26.0092	35.1717	52.5092
0.287494	0.542918	0.777145	1.01467	1.32526	1.72626	2.37836	3.17732	4.73371	6.85538	10.0417	14.377	19.5457	26.0624	35.242	52.5534
0.287631	0.54356	0.778217	1.01467	1.32526	1.72692	2.38161	3.17849	4.7411	6.85538	10.0871	14.377	19.5596	26.0824	35.3151	52.5639
0.287874	0.544088	0.778217	1.01467	1.32526	1.72882	2.38219	3.18076	4.75286	6.86635	10.0993	14.4023	19.5713	26.1415	35.3836	52.6526
0.28793	0.544705	0.778217	1.01467	1.32526	1.73048	2.38481	3.19042	4.75286	6.87192	10.1025	14.4191	19.629	26.1502	35.4638	53.0215
0.287987	0.545396	0.778217	1.01467	1.32526	1.73079	2.38799	3.19176	4.77828	6.88073	10.1036	14.4414	19.6443	26.1818	35.487	53.1168
0.288082	0.545524	0.778217	1.01496	1.32526	1.73633	2.38928	3.19608	4.77828	6.90218	10.1185	14.4456	19.6568	26.1852	35.5019	53.211
0.288108	0.547047	0.778217	1.01522	1.32564	1.73633	2.38935	3.19756	4.77828	6.90818	10.1336	14.4514	19.6687	26.262	35.5067	53.4703
0.28836	0.54716	0.778217	1.01697	1.32777	1.74015	2.39065	3.19889	4.79058	6.9147	10.153	14.478	19.6759	26.2957	35.526	53.527
0.288377	0.547496	0.778217	1.01708	1.33224	1.74015	2.39256	3.20339	4.79437	6.91704	10.1546	14.4916	19.7061	26.2976	35.5596	53.5399
0.289412	0.548026	0.778217	1.02182	1.33444	1.74015	2.40647	3.22087	4.80122	6.94147	10.1605	14.4941	19.7074	26.3056	35.6131	53.7575
0.289459	0.548073	0.778217	1.02272	1.33474	1.74015	2.40864	3.22461	4.82405	6.94537	10.1649	14.5546	19.7178	26.3148	35.6644	53.7927
0.289559	0.548416	0.778217	1.02272	1.33577	1.74015	2.40916	3.22461	4.8363	6.94567	10.1746	14.5697	19.7225	26.3263	35.7073	53.8206
0.290087	0.548566	0.778217	1.02272	1.33577	1.74131	2.41173	3.22952	4.83955	6.96281	10.1898	14.5752	19.7422	26.3932	35.7272	53.8947
[truncated: 4,893 more rows]
