# Supplementary material for: Long-term intravital imaging of the multicolor-coded tumor microenvironment during combination immunotherapy
Source: eLife. 2016 Nov 18;5:e14756. doi: 10.7554/eLife.14756 (PMC5173323; doi:10.7554/eLife.14756)
Supplement: Figure 3—source data 7. — DOI: http://dx.doi.org/10.7554/eLife.14756.022 [file elife-14756-fig3-data7.xls]

## Sheet: displacement(um)
0	0	0	0	0	0	0	0	0	0	0	0	0	0	0	0	0	0	0	0	0	0	0	0	0	0.102653	0	0.17229	0.0760072	0
0	0	0	0	0	0	0	0	0	0	0	0	0	0	0	0	0	0	0	0	0	0.0306871	0.0242065	0.059807	0.0460458	0.12175	0.0884707	0.174046	0.206289	0.0807187
0	0	0	0	0	0	0	0	0	0	0	0	0	0	0	0	0	0	0	0.0328722	0.0849335	0.0498654	0.109981	0.110398	0.163086	0.198125	0.142518	0.205776	0.20868	0.234109
0	0	0	0	0	0	0	0	0	0	0	0	0	0	0	0.0192697	0	0	0	0.0979564	0.100867	0.0549514	0.112706	0.112929	0.185387	0.227951	0.180307	0.211976	0.23523	0.330884
0	0	0	0	0	0	0	0	0	0	0	0	0	0	0	0.0331314	0.0313033	0.0338332	0.034368	0.10487	0.105411	0.0929313	0.136185	0.140628	0.186844	0.237098	0.197532	0.248047	0.246094	0.360526
0	0	0	0	0	0	0	0	0	0	0	0	0	0	0.0375349	0.0392383	0.0686938	0.0472662	0.0648859	0.111872	0.108287	0.101314	0.141156	0.146632	0.188582	0.239275	0.219712	0.248831	0.257817	0.476126
0	0	0	0	0	0	0	0	0	0	0	0	0	0	0.0444451	0.0427957	0.0828851	0.0546064	0.0723373	0.112588	0.12521	0.130213	0.141311	0.15679	0.195372	0.241334	0.229439	0.25138	0.311145	0.495085
0	0	0	0	0	0	0	0	0	0	0	0	0	0.0376145	0.0558825	0.0491592	0.0837985	0.0593133	0.0892656	0.11874	0.134139	0.152047	0.180856	0.190882	0.22005	0.246094	0.237168	0.254844	0.441305	0.510568
0	0	0	0	0	0	0	0	0	0	0	0	0	0.0468362	0.0705161	0.0528778	0.0881732	0.0624608	0.0948213	0.146844	0.139869	0.168835	0.182787	0.193045	0.223131	0.248047	0.246094	0.266835	0.447882	0.562804
0	0	0	0	0	0	0	0	0	0	0	0	0	0.0529971	0.0759215	0.0576066	0.0898448	0.0748208	0.105249	0.151022	0.146371	0.178251	0.196737	0.200448	0.247899	0.248047	0.258539	0.273712	0.448904	0.594217
0	0	0	0	0	0	0	0	0	0	0.00722632	0	0.0275544	0.0560085	0.076401	0.0591345	0.0920283	0.0769063	0.118097	0.153106	0.150217	0.180404	0.20498	0.203356	0.248047	0.258817	0.272092	0.291166	0.450766	0.632398
0	0	0	0	0	0	0	0	0	0	0.0182612	0	0.0316431	0.0664319	0.0802711	0.0761794	0.0975392	0.0854963	0.121017	0.154533	0.151105	0.194907	0.216626	0.214351	0.248047	0.264557	0.276488	0.296343	0.465216	0.696665
0	0	0	0	0	0	0	0	0	0	0.0187783	0.0263876	0.0532628	0.0710706	0.0849984	0.0801459	0.0988391	0.0864854	0.128423	0.155457	0.154091	0.208226	0.240292	0.221302	0.262371	0.275673	0.281814	0.300214	0.476879	0.714262
0	0	0	0	0	0	0	0	0	0.0131338	0.0275133	0.0326897	0.0556973	0.0794073	0.0863962	0.0865082	0.0992295	0.102825	0.131652	0.159204	0.154896	0.209348	0.241808	0.228823	0.269492	0.285135	0.283305	0.305169	0.483181	0.750449
0	0	0	0	0	0	0	0	0	0.0280873	0.0364321	0.0410235	0.0598449	0.0805552	0.0962158	0.0870247	0.100926	0.103234	0.144095	0.187647	0.164644	0.209861	0.245469	0.231809	0.273001	0.287251	0.284694	0.331225	0.491556	0.755285
0	0	0	0	0	0	0	0.00507335	0.0201004	0.0305783	0.0441723	0.0507969	0.0600163	0.0897787	0.0984567	0.0907496	0.10462	0.120024	0.156931	0.188893	0.171577	0.210371	0.246094	0.246094	0.277343	0.291627	0.285749	0.355729	0.504192	0.760552
0	0	0	0	0	0	0	0.0153293	0.0269705	0.0312185	0.0574539	0.0567373	0.0611463	0.0914689	0.099649	0.0938655	0.106246	0.123834	0.16329	0.189616	0.179846	0.233817	0.246094	0.248047	0.279132	0.305928	0.293035	0.375356	0.53117	0.790983
0	0	0	0	0	0	0	0.0174232	0.0314404	0.0312234	0.0596345	0.0571215	0.0637022	0.0924386	0.107299	0.105663	0.114525	0.128143	0.173622	0.1927	0.1914	0.235402	0.248047	0.248047	0.28325	0.307043	0.295773	0.398644	0.548524	0.793628
0	0	0	0	0	0	0	0.0220171	0.0333802	0.0404989	0.0645144	0.0646588	0.0644823	0.0930334	0.107737	0.107174	0.116747	0.144187	0.177998	0.197059	0.200834	0.246094	0.248047	0.248284	0.295568	0.312063	0.29939	0.407053	0.551158	0.80795
0	0	0	0	0	0	0	0.0271485	0.0342912	0.0425625	0.0648569	0.0646728	0.0714624	0.111812	0.110434	0.110419	0.117793	0.14732	0.179296	0.218387	0.206189	0.246094	0.248047	0.2601	0.303084	0.324334	0.317744	0.442518	0.59611	0.825082
0	0	0	0	0	0	0	0.0292916	0.038575	0.0494535	0.0677051	0.0682413	0.0780722	0.113135	0.11204	0.119208	0.119457	0.147496	0.184255	0.22292	0.2065	0.246094	0.253238	0.262448	0.307501	0.324928	0.332655	0.447233	0.596831	0.838266
0	0	0	0	0	0	0.003086	0.0295845	0.0457972	0.0548698	0.0690889	0.074101	0.081353	0.114452	0.118691	0.119457	0.124724	0.151069	0.185066	0.225616	0.213574	0.247187	0.25503	0.266507	0.312918	0.335672	0.350791	0.457359	0.598831	0.844817
0	0	0	0	0	0	0.00406241	0.0317816	0.046096	0.057515	0.0709528	0.074192	0.0821143	0.119076	0.121252	0.124955	0.126118	0.15319	0.194119	0.226411	0.214436	0.248047	0.256075	0.273387	0.314117	0.338678	0.350895	0.464366	0.604688	0.874927
0	0	0	0	0	0	0.0108015	0.0322892	0.0516998	0.0599339	0.0713156	0.0770462	0.0879424	0.122801	0.123812	0.12731	0.127276	0.157233	0.199956	0.228083	0.226731	0.248047	0.256336	0.280254	0.314651	0.340856	0.359007	0.467024	0.606854	0.876561
0	0	0	0	0	0.0102831	0.011391	0.0326851	0.0521174	0.060729	0.0737799	0.0794614	0.0904896	0.126764	0.12731	0.137853	0.128472	0.161716	0.201816	0.232255	0.235019	0.248047	0.256683	0.282968	0.316234	0.34272	0.368107	0.47795	0.620196	0.891389
0	0	0	0	0	0.0130549	0.0115014	0.0334608	0.0530114	0.0647792	0.0745206	0.0870463	0.0921214	0.12806	0.129495	0.139517	0.13074	0.162531	0.206909	0.233163	0.239736	0.252972	0.25705	0.289499	0.339451	0.343779	0.373284	0.492188	0.624225	0.910654
0	0	0	0	0	0.0215473	0.0118343	0.0344902	0.054901	0.0653787	0.079234	0.0918523	0.0957618	0.130617	0.133181	0.139609	0.137873	0.172721	0.209277	0.235218	0.242784	0.257383	0.257699	0.293316	0.34102	0.345933	0.376947	0.494482	0.64297	0.923854
0	0	0	0	0	0.0249312	0.0123323	0.0396398	0.0550223	0.0661055	0.08156	0.0945167	0.0992342	0.130832	0.133407	0.148011	0.148361	0.17992	0.210343	0.235592	0.246094	0.263458	0.258887	0.298229	0.341107	0.346359	0.390931	0.495973	0.647913	0.952073
0	0	0	0	0	0.0266671	0.0132989	0.0464884	0.056488	0.0673336	0.0837774	0.0946019	0.10119	0.133679	0.1357	0.148109	0.149279	0.180136	0.210819	0.2372	0.246094	0.269328	0.268875	0.298539	0.34523	0.348584	0.39108	0.499864	0.651107	0.961604
0	0	0	0	0	0.027272	0.0181214	0.0468893	0.0579148	0.0690314	0.0846013	0.0956457	0.103859	0.135145	0.141126	0.149263	0.152531	0.181105	0.212007	0.243012	0.246094	0.273101	0.270745	0.3001	0.348361	0.350791	0.402601	0.500279	0.670961	0.995523
0	0	0	0	0	0.0278969	0.0187988	0.0486466	0.0586036	0.0709519	0.0856556	0.0960081	0.107036	0.137374	0.143996	0.149303	0.156159	0.181375	0.213238	0.245399	0.248047	0.274964	0.272072	0.30825	0.350791	0.356132	0.414649	0.501368	0.672027	1.01467
0	0	0	0	0.00872158	0.0288885	0.0216618	0.0498953	0.0605095	0.0725013	0.085946	0.101016	0.119473	0.138588	0.144208	0.154283	0.158207	0.181545	0.215988	0.246094	0.248047	0.280494	0.273029	0.310679	0.350791	0.374091	0.41465	0.504985	0.678781	1.02816
0	0	0	0	0.00913535	0.0300683	0.0266782	0.0513213	0.0610547	0.0733336	0.0893149	0.103535	0.122033	0.139134	0.144275	0.155967	0.166782	0.184505	0.220176	0.246094	0.249953	0.283614	0.273197	0.318382	0.350791	0.386927	0.415768	0.505747	0.701969	1.04731
0	0	0	0	0.0132782	0.032215	0.0271741	0.0524131	0.0653397	0.0780025	0.0893731	0.104684	0.123682	0.139548	0.147023	0.156729	0.170539	0.189664	0.220236	0.246094	0.259028	0.284303	0.276552	0.320122	0.355596	0.391558	0.416317	0.515554	0.702325	1.13096
0	0	0	0	0.0160029	0.0360944	0.0276732	0.0534648	0.0665421	0.0791309	0.0936697	0.104944	0.126972	0.139725	0.151487	0.16336	0.170973	0.190134	0.222756	0.246094	0.2633	0.284694	0.280946	0.322615	0.356254	0.396534	0.43288	0.523157	0.703555	1.17583
0	0	0	0	0.0172059	0.0363107	0.0301234	0.0546472	0.0667265	0.0823276	0.0977333	0.106971	0.128189	0.141496	0.154324	0.165757	0.173729	0.194003	0.23058	0.246094	0.268266	0.291576	0.286719	0.328416	0.364894	0.396995	0.435318	0.530259	0.708145	1.20797
0	0	0	0	0.0176571	0.0380535	0.0318264	0.0547061	0.0679765	0.082361	0.0981128	0.1105	0.132048	0.144253	0.159895	0.171232	0.174377	0.199827	0.230724	0.246094	0.272472	0.293659	0.292643	0.329422	0.372633	0.398809	0.43579	0.541295	0.712297	1.20976
0	0	0	0	0.0179062	0.0388074	0.0319263	0.0566851	0.0683951	0.0864854	0.100473	0.110648	0.133572	0.146624	0.160275	0.172749	0.175909	0.201064	0.23265	0.255694	0.274558	0.297169	0.300333	0.334228	0.37388	0.401595	0.43915	0.541375	0.723612	1.23047
0	0	0	0	0.0190609	0.0400959	0.0328556	0.0594276	0.0707118	0.0887509	0.102453	0.111145	0.13561	0.15012	0.162839	0.174788	0.178275	0.202033	0.235699	0.256439	0.279855	0.303643	0.303243	0.335781	0.375943	0.406545	0.440812	0.541982	0.7354	1.23047
0	0	0	0	0.0191341	0.0401557	0.0363107	0.0595701	0.0720148	0.0914239	0.102747	0.113571	0.135611	0.151577	0.1642	0.176335	0.182245	0.205446	0.236749	0.256873	0.284694	0.306771	0.303244	0.338152	0.377341	0.408995	0.443447	0.5466	0.744141	1.23047
0	0	0	0	0.0195907	0.0406263	0.0400135	0.0616493	0.0727565	0.0925703	0.102914	0.116992	0.136054	0.152072	0.168556	0.17947	0.182608	0.209645	0.24024	0.258416	0.285702	0.308247	0.305764	0.340799	0.381886	0.412653	0.454731	0.5476	0.759411	1.23047
0	0	0	0	0.0214994	0.0447542	0.0403055	0.0620367	0.0732464	0.0932362	0.104758	0.117127	0.136829	0.152892	0.169575	0.180023	0.18355	0.215436	0.241769	0.26125	0.293314	0.313408	0.308395	0.345449	0.385556	0.413239	0.458837	0.548631	0.770401	1.23047
0	0	0	0	0.024243	0.0458871	0.040767	0.0624682	0.0761574	0.0935856	0.107057	0.117588	0.139213	0.154477	0.170692	0.180564	0.183783	0.222703	0.246094	0.261631	0.293943	0.313757	0.30941	0.346967	0.386887	0.422525	0.461376	0.550282	0.775672	1.23047
0	0	0	0	0.0243627	0.0472258	0.042223	0.0632729	0.078046	0.0943635	0.110131	0.119492	0.140917	0.155094	0.173428	0.186353	0.185484	0.223738	0.246094	0.262031	0.294087	0.317593	0.309502	0.348029	0.393287	0.422626	0.472215	0.55678	0.780537	1.23047
0	0	0	0	0.0259384	0.0474629	0.044738	0.0648513	0.0784765	0.0945426	0.111206	0.121174	0.140936	0.155997	0.174475	0.188578	0.187142	0.228325	0.246094	0.262371	0.298467	0.322171	0.309546	0.350791	0.394829	0.429398	0.475561	0.56688	0.784792	1.23047
0	0	0	0	0.0264525	0.0475103	0.0452819	0.0652555	0.0788777	0.0972771	0.111219	0.123627	0.143573	0.156243	0.174552	0.189354	0.193179	0.22886	0.246094	0.262976	0.29873	0.322869	0.309654	0.350791	0.395272	0.431069	0.479596	0.567129	0.819509	1.23047
0	0	0	0	0.0273411	0.0490724	0.0493311	0.0653781	0.0796622	0.0993324	0.111825	0.124742	0.145542	0.158116	0.174575	0.193	0.199248	0.229192	0.248012	0.265703	0.304334	0.323223	0.319491	0.350791	0.395321	0.441905	0.482179	0.572471	0.842387	1.23047
0	0	0	0	0.0280009	0.049545	0.0506622	0.0653802	0.0813623	0.099534	0.118388	0.126787	0.147829	0.16382	0.175359	0.199921	0.200231	0.229719	0.248047	0.268028	0.307965	0.324186	0.323112	0.350791	0.397131	0.443159	0.489726	0.591055	0.844688	1.24023
0	0	0	0.00198407	0.0292316	0.0501817	0.0527974	0.0659266	0.0816116	0.100154	0.11851	0.130918	0.148321	0.167511	0.184836	0.202508	0.205054	0.230928	0.248047	0.270364	0.308294	0.325474	0.336347	0.350791	0.403665	0.443247	0.494866	0.599824	0.850604	1.24023
0	0	0	0.0058767	0.0315828	0.0505615	0.0568434	0.0660728	0.0818103	0.100357	0.118971	0.131072	0.149068	0.167595	0.187125	0.203368	0.207006	0.233155	0.248054	0.270386	0.311921	0.329275	0.340184	0.353008	0.404541	0.443623	0.496285	0.600038	0.854196	1.24655
0	0	0	0.00619648	0.0363107	0.0505841	0.0571184	0.0661444	0.0836817	0.101364	0.119353	0.132719	0.149656	0.168347	0.18832	0.203406	0.210352	0.234293	0.250685	0.273872	0.312303	0.330021	0.345156	0.353439	0.408799	0.446754	0.497296	0.606219	0.858906	1.25964
0	0	0	0.00637847	0.0385773	0.0507246	0.0576746	0.0685424	0.0838863	0.10233	0.1207	0.133007	0.150118	0.16928	0.190552	0.203468	0.212384	0.234681	0.252408	0.273882	0.312977	0.331769	0.347421	0.35448	0.412121	0.449274	0.500171	0.647916	0.861136	1.26834
0	0	0	0.00699205	0.0386643	0.0508593	0.0576901	0.0685795	0.0841088	0.102557	0.121174	0.134885	0.150173	0.169594	0.192994	0.20812	0.213356	0.236177	0.253482	0.275341	0.31551	0.332646	0.348029	0.362774	0.413917	0.450625	0.510306	0.656632	0.869369	1.27681
0	0	0	0.00819625	0.0392302	0.0509197	0.0578781	0.0688474	0.0845765	0.102722	0.121915	0.139023	0.152594	0.171224	0.193163	0.208559	0.215242	0.239576	0.253696	0.27826	0.320189	0.335181	0.348029	0.364237	0.418041	0.452683	0.510602	0.666595	0.870073	1.29124
0	0	0	0.0101884	0.0402401	0.0529382	0.0580183	0.0711904	0.084972	0.102738	0.123422	0.139268	0.152597	0.171297	0.194425	0.208618	0.215549	0.239999	0.256771	0.280419	0.321841	0.336308	0.349829	0.365083	0.418275	0.463729	0.512644	0.672977	0.889545	1.32453
0	0	0	0.0123661	0.0403849	0.0534439	0.0589211	0.0715371	0.0855654	0.104445	0.124712	0.139445	0.152934	0.17292	0.195613	0.209257	0.21862	0.246094	0.25785	0.280601	0.324639	0.338628	0.350791	0.367491	0.424061	0.466594	0.517027	0.674628	0.898437	1.33289
0	0	0	0.0144301	0.0412858	0.0547593	0.0592481	0.0728874	0.0862624	0.104878	0.124977	0.140268	0.15505	0.172952	0.195896	0.21107	0.223986	0.246094	0.257943	0.281898	0.324757	0.340494	0.350791	0.369985	0.426752	0.475535	0.518165	0.678767	0.900918	1.34846
0	0	0	0.0155298	0.0415354	0.0549418	0.0599814	0.0731429	0.0872773	0.106262	0.127497	0.141495	0.155696	0.175225	0.19856	0.212093	0.225621	0.246094	0.257958	0.284694	0.324928	0.342774	0.350791	0.378298	0.427422	0.475829	0.520218	0.681254	0.904286	1.36209
0	0	0	0.0159031	0.0421819	0.05496	0.0611171	0.0738566	0.0893393	0.107378	0.128092	0.141873	0.155824	0.176118	0.200356	0.213076	0.22695	0.246094	0.25986	0.28859	0.325504	0.343463	0.352021	0.384584	0.432554	0.47992	0.522582	0.684499	0.90515	1.38448
0	0	0	0.016568	0.0426222	0.0557175	0.0626121	0.0738918	0.0898434	0.107681	0.128136	0.142101	0.156855	0.180722	0.200892	0.214543	0.230143	0.246094	0.26009	0.29013	0.326678	0.344512	0.353439	0.384837	0.438021	0.480891	0.522849	0.694957	0.911236	1.38762
0	0	0	0.0176575	0.0430026	0.0568294	0.0628731	0.0740355	0.0903621	0.107789	0.129978	0.147997	0.158916	0.182346	0.204233	0.215468	0.234066	0.246094	0.261182	0.296049	0.327586	0.348029	0.354827	0.387537	0.441872	0.481098	0.523786	0.700632	0.914464	1.39044
0	0	0	0.0179248	0.0456386	0.0571654	0.0640345	0.0744172	0.0903831	0.10823	0.130291	0.148353	0.160018	0.182667	0.205247	0.216424	0.240074	0.246094	0.262371	0.30127	0.328052	0.348029	0.364142	0.390121	0.443181	0.48411	0.526746	0.703297	0.925214	1.39299
0	0	0	0.0200026	0.0471526	0.0575529	0.0641415	0.0745117	0.0911036	0.108768	0.130388	0.151579	0.161606	0.183646	0.205529	0.216803	0.241142	0.246094	0.263844	0.303512	0.328895	0.350791	0.368476	0.392983	0.445487	0.490232	0.530577	0.703488	0.927386	1.41759
0	0	0	0.0213138	0.0474629	0.0592249	0.065118	0.0768295	0.0913244	0.108854	0.131179	0.151672	0.164748	0.185511	0.206815	0.221487	0.241367	0.246094	0.266157	0.303845	0.330877	0.350791	0.371073	0.396665	0.447855	0.492188	0.535871	0.705413	0.936182	1.4268
0	0	0	0.0216734	0.0481396	0.0597729	0.0661156	0.0774247	0.0915088	0.110764	0.132983	0.151758	0.165013	0.1867	0.209153	0.223117	0.244452	0.247253	0.269603	0.304081	0.334607	0.350791	0.372988	0.398531	0.451886	0.493862	0.541466	0.706209	0.948026	1.44367
0	0	0	0.021804	0.0486762	0.0603339	0.069061	0.0778848	0.0938981	0.111952	0.134235	0.1521	0.167015	0.187239	0.210524	0.228204	0.246094	0.248047	0.270626	0.304987	0.33844	0.350791	0.377092	0.399928	0.457685	0.49602	0.560297	0.70942	0.953428	1.46814
0	0	0	0.0230571	0.0489825	0.0612197	0.0690802	0.0785346	0.094235	0.113216	0.134983	0.152804	0.167474	0.18907	0.213426	0.229305	0.246094	0.248047	0.275582	0.306184	0.340168	0.351757	0.382053	0.402384	0.459958	0.497795	0.568001	0.717046	0.954154	1.4744
0	0	0.00413628	0.0258483	0.049082	0.0613519	0.0696463	0.0785522	0.0945715	0.113466	0.135721	0.152908	0.16766	0.189519	0.21406	0.230143	0.246094	0.248047	0.279913	0.306386	0.341015	0.351898	0.38297	0.404301	0.460001	0.498203	0.569968	0.727307	0.954732	1.47675
0	0	0.00742174	0.0262862	0.0496018	0.062912	0.0710257	0.0794789	0.0957592	0.114493	0.137248	0.153504	0.167697	0.190604	0.214408	0.231517	0.246094	0.248047	0.282458	0.309143	0.348021	0.3534	0.383671	0.405482	0.460935	0.498671	0.570951	0.733078	0.958553	1.50408
0	0	0.00831819	0.0268242	0.0505197	0.0642689	0.0716895	0.0801178	0.096092	0.114626	0.137541	0.154009	0.169313	0.191803	0.216038	0.23824	0.246094	0.248047	0.284694	0.309867	0.348029	0.353439	0.383712	0.408161	0.463128	0.498727	0.572288	0.733804	0.97969	1.51005
0	0	0.00843387	0.0269259	0.0507862	0.0644676	0.0729249	0.0812558	0.0964038	0.118461	0.137878	0.154185	0.169375	0.193987	0.217985	0.242422	0.246094	0.252682	0.288362	0.310142	0.348029	0.354993	0.38505	0.411337	0.473815	0.502108	0.58144	0.734174	0.984375	1.53196
0	0	0.00958503	0.0279587	0.0510069	0.0648055	0.0731265	0.0812907	0.098205	0.119114	0.138298	0.154979	0.170607	0.194346	0.217992	0.244961	0.246094	0.252801	0.288579	0.311537	0.348029	0.356259	0.387577	0.414839	0.474883	0.502503	0.587965	0.736368	0.986762	1.56247
0	0	0.0111919	0.0293982	0.0516005	0.0680299	0.0732213	0.0821897	0.100783	0.120121	0.139932	0.155895	0.17143	0.194775	0.221532	0.245677	0.246094	0.25292	0.290979	0.31475	0.350381	0.360386	0.387992	0.415888	0.475235	0.503269	0.590589	0.740465	0.993679	1.56517
0	0	0.0116115	0.0296974	0.0517549	0.068553	0.0733087	0.0827903	0.100802	0.120477	0.140354	0.158922	0.173087	0.194882	0.224059	0.246094	0.246094	0.254596	0.296173	0.316112	0.350581	0.362142	0.388139	0.415981	0.475927	0.505159	0.593284	0.751185	0.998811	1.56855
0	0	0.0126834	0.0300234	0.0518927	0.0686573	0.0734616	0.0841446	0.101117	0.121174	0.140508	0.158999	0.174154	0.196292	0.225119	0.246094	0.246565	0.254703	0.297428	0.316746	0.350791	0.36448	0.38898	0.417905	0.476413	0.509808	0.606444	0.752868	1.00064	1.57915
0	0	0.0136132	0.0301969	0.0520492	0.0692252	0.0739564	0.0855908	0.102129	0.121474	0.140779	0.160018	0.175528	0.19645	0.225717	0.246094	0.247215	0.259029	0.307311	0.317022	0.350791	0.365475	0.389364	0.419555	0.476635	0.511	0.60653	0.758783	1.02449	1.59943
0	0	0.014036	0.0311026	0.052472	0.0692334	0.074038	0.0860967	0.104889	0.121728	0.141505	0.161684	0.175602	0.197262	0.22597	0.246094	0.24742	0.259409	0.30825	0.317171	0.350791	0.368674	0.389698	0.421144	0.47748	0.513881	0.608728	0.784393	1.02643	1.60501
0	0	0.0145192	0.0319943	0.0530565	0.0696602	0.0742506	0.0861104	0.105906	0.122178	0.141597	0.161774	0.175964	0.200654	0.226847	0.246094	0.248047	0.261946	0.308659	0.317434	0.350791	0.368846	0.389772	0.424061	0.480274	0.518104	0.612231	0.790438	1.03216	1.6298
0	0	0.015059	0.0323803	0.0536484	0.0698218	0.0744824	0.0868994	0.106613	0.122178	0.14362	0.162047	0.176422	0.204924	0.227533	0.246094	0.248047	0.262371	0.310279	0.319504	0.351096	0.373094	0.391437	0.427239	0.482709	0.518604	0.613512	0.791703	1.03775	1.6537
0	0	0.0158578	0.0330859	0.0536599	0.0699881	0.0745516	0.0874137	0.107021	0.124166	0.143631	0.162155	0.176868	0.205511	0.23002	0.246094	0.248047	0.265304	0.31223	0.322313	0.351516	0.374386	0.397134	0.429052	0.482917	0.519569	0.61872	0.796049	1.04295	1.68468
0	0	0.0158773	0.0332837	0.0538851	0.0704044	0.07494	0.0874714	0.107099	0.124779	0.143633	0.16266	0.177365	0.207916	0.231595	0.246094	0.248047	0.267801	0.312309	0.324928	0.353439	0.377331	0.398367	0.434994	0.484296	0.525568	0.62068	0.797132	1.04636	1.68875
0	0	0.0164538	0.0337214	0.0549022	0.0706607	0.0750502	0.0892073	0.107308	0.125957	0.14411	0.163004	0.177869	0.208336	0.235688	0.246094	0.248047	0.267944	0.313076	0.328445	0.353851	0.377511	0.404685	0.439982	0.485118	0.525761	0.624014	0.797278	1.04864	1.69056
0	0	0.0167344	0.0344551	0.0551559	0.0708188	0.0763691	0.090025	0.10755	0.126157	0.144706	0.163004	0.177966	0.209187	0.236621	0.246094	0.248525	0.268075	0.314505	0.330139	0.355181	0.377553	0.40637	0.440503	0.48771	0.526969	0.625425	0.808184	1.0538	1.70273
0	0	0.0171407	0.0347981	0.0557674	0.0720685	0.076829	0.0903725	0.107622	0.12632	0.145661	0.163408	0.178249	0.209203	0.237496	0.246094	0.25035	0.273517	0.315525	0.334668	0.358471	0.378274	0.412584	0.440641	0.489029	0.527321	0.625764	0.810208	1.07748	1.73757
0	0	0.0178825	0.0347996	0.0558904	0.0724512	0.0769176	0.0916997	0.107659	0.126574	0.146144	0.163638	0.179019	0.212043	0.239586	0.246094	0.250735	0.274662	0.322214	0.335026	0.358584	0.379175	0.412716	0.448894	0.490526	0.527359	0.626623	0.811236	1.07772	1.73852
0	0	0.0181685	0.0350796	0.0561531	0.072794	0.0771367	0.0917227	0.107813	0.12724	0.146228	0.163864	0.182392	0.212361	0.239847	0.246094	0.252175	0.280837	0.322294	0.337575	0.36068	0.379719	0.412878	0.450315	0.492188	0.530079	0.632514	0.814161	1.08368	1.74015
0	0	0.0184673	0.0382114	0.0565044	0.0736068	0.0773339	0.091771	0.10803	0.127328	0.146471	0.164113	0.185362	0.212543	0.240026	0.246094	0.253615	0.281651	0.323368	0.338398	0.361762	0.381604	0.416341	0.450403	0.494111	0.531205	0.634017	0.817824	1.08376	1.74015
0	0	0.0185372	0.0387402	0.0567834	0.0744824	0.0789617	0.0923187	0.109182	0.128211	0.147239	0.164472	0.18572	0.212849	0.241765	0.246094	0.262371	0.281991	0.323952	0.341528	0.362512	0.383553	0.417424	0.455645	0.496094	0.550114	0.636274	0.830777	1.09286	1.74015
0	0	0.0194686	0.0388302	0.0569751	0.0749036	0.0791978	0.0932952	0.109775	0.129008	0.149717	0.165229	0.185826	0.213148	0.243145	0.246228	0.263013	0.283646	0.32422	0.347836	0.363834	0.384954	0.421666	0.455814	0.499766	0.551681	0.642871	0.840781	1.09816	1.74015
0	0	0.019984	0.0398719	0.0572052	0.0749536	0.079596	0.0938163	0.11049	0.130607	0.150214	0.166842	0.185941	0.213726	0.243557	0.248047	0.263403	0.284694	0.324586	0.348029	0.371187	0.386741	0.42374	0.456902	0.500545	0.553574	0.646807	0.841457	1.10056	1.74015
0	0	0.0207964	0.0400885	0.0576461	0.0757027	0.0797444	0.0938676	0.112981	0.131552	0.150348	0.167713	0.18671	0.213891	0.24402	0.248047	0.263849	0.285595	0.324928	0.348029	0.373253	0.391822	0.424061	0.457852	0.501417	0.556753	0.648199	0.854886	1.11353	1.77211
0	0	0.0208255	0.0404002	0.0581532	0.0759634	0.0808419	0.094173	0.113044	0.131601	0.1505	0.168738	0.187923	0.214085	0.244381	0.248047	0.263946	0.286158	0.327426	0.348029	0.373508	0.392713	0.424133	0.46005	0.502859	0.55767	0.6565	0.855166	1.13068	1.77341
0	0	0.0212602	0.0406343	0.0590974	0.0770777	0.0814018	0.095776	0.113859	0.132288	0.150966	0.170026	0.189954	0.214698	0.245928	0.248047	0.264376	0.286777	0.327578	0.348054	0.373586	0.392729	0.42946	0.460874	0.504708	0.561314	0.66401	0.856598	1.13433	1.77489
0	0	0.0215841	0.041262	0.0592019	0.0775958	0.0816376	0.0958747	0.114524	0.133611	0.151131	0.170424	0.191663	0.216154	0.246094	0.248047	0.264416	0.289429	0.328166	0.349235	0.375283	0.393923	0.430131	0.465568	0.5074	0.566143	0.664851	0.858554	1.13859	1.78328
0	0	0.0235512	0.0421694	0.0593155	0.0776742	0.0819209	0.0963312	0.114535	0.133904	0.151192	0.170969	0.192084	0.21777	0.246094	0.248047	0.268075	0.293343	0.330019	0.350791	0.376303	0.395736	0.430339	0.466197	0.509436	0.569667	0.66517	0.864841	1.15726	1.80996
0	0	0.0235846	0.0423884	0.0593791	0.0785256	0.0822824	0.0963899	0.114591	0.134188	0.151603	0.17112	0.192657	0.218213	0.246094	0.248047	0.268868	0.295704	0.331638	0.350791	0.378669	0.398464	0.433012	0.47229	0.51549	0.57115	0.665394	0.86574	1.17637	1.83542
0	0	0.0243303	0.0424952	0.0598522	0.0790793	0.0824723	0.0964669	0.115057	0.134217	0.152008	0.174696	0.193174	0.218932	0.246094	0.248047	0.273124	0.297293	0.332388	0.350791	0.378845	0.405776	0.433865	0.47469	0.519957	0.575553	0.666376	0.866297	1.17707	1.88576
0	0	0.0256744	0.0436574	0.0622982	0.0795843	0.0830106	0.0965935	0.11525	0.134578	0.152038	0.175926	0.195489	0.21959	0.246094	0.248047	0.273314	0.297419	0.333295	0.350791	0.379528	0.406566	0.436429	0.480565	0.522256	0.578026	0.679078	0.87872	1.17925	1.91037
0	0	0.0257744	0.0441246	0.0624489	0.079755	0.0833261	0.0971364	0.118105	0.134637	0.153232	0.176053	0.196723	0.22096	0.246094	0.249407	0.273399	0.29755	0.334165	0.350791	0.382189	0.40699	0.438113	0.482702	0.522524	0.579181	0.686437	0.883979	1.183	1.95674
0	0	0.0258003	0.0449512	0.0629525	0.080028	0.084114	0.0977042	0.11881	0.135372	0.155454	0.177306	0.197324	0.221269	0.246094	0.250798	0.274451	0.300894	0.335479	0.350791	0.387261	0.408927	0.438335	0.482857	0.524672	0.581592	0.698872	0.887825	1.19126	1.96473
0	0	0.0260223	0.0451594	0.0630169	0.0810682	0.0844845	0.0978133	0.120296	0.136898	0.155531	0.177767	0.1979	0.221408	0.246094	0.254812	0.275119	0.30825	0.335743	0.353197	0.388748	0.409704	0.445251	0.487733	0.525761	0.584003	0.710276	0.888632	1.19693	1.98726
0	0	0.026119	0.045304	0.063124	0.0811331	0.0847944	0.0978793	0.12069	0.137603	0.15575	0.17808	0.201922	0.222766	0.246094	0.258235	0.275765	0.310764	0.336195	0.354859	0.389015	0.410008	0.450391	0.488244	0.529069	0.594527	0.718688	0.891956	1.20221	1.99701
0	0	0.0262621	0.0458703	0.0648979	0.0813078	0.0850903	0.0980767	0.120765	0.137946	0.15757	0.17811	0.202497	0.223444	0.246094	0.2611	0.277153	0.312351	0.33649	0.355817	0.38932	0.411514	0.450779	0.489557	0.533431	0.596492	0.719064	0.893246	1.20329	2.03679
0	0	0.0262969	0.0463823	0.0649858	0.0819353	0.0863131	0.0984972	0.121153	0.138242	0.160018	0.179159	0.202766	0.223466	0.246094	0.262371	0.277815	0.312659	0.336547	0.357516	0.390956	0.418823	0.452976	0.492871	0.538344	0.60271	0.720997	0.895488	1.21539	2.04102
0	0	0.0265065	0.046448	0.0649916	0.0824723	0.0863727	0.100905	0.121252	0.138574	0.160992	0.180885	0.202794	0.223534	0.246094	0.262386	0.279495	0.314789	0.337918	0.357579	0.392944	0.420066	0.457951	0.493156	0.540102	0.605294	0.727861	0.900318	1.2195	2.08073
0	0	0.0265784	0.0471396	0.0653384	0.0826245	0.0865562	0.102054	0.121457	0.139685	0.161231	0.18113	0.203547	0.223541	0.246094	0.262928	0.280411	0.315709	0.338418	0.357841	0.393698	0.423464	0.462298	0.494649	0.543413	0.607758	0.72806	0.901972	1.22406	2.14079
0	0	0.0267649	0.0473387	0.065681	0.0832696	0.0885583	0.103013	0.121798	0.140062	0.161681	0.181678	0.204194	0.224688	0.246094	0.263011	0.283935	0.315853	0.340159	0.358945	0.395352	0.424061	0.462737	0.495389	0.547039	0.611411	0.732104	0.913916	1.22487	2.18238
0	0	0.0268617	0.0478189	0.0660143	0.0836896	0.0887329	0.103133	0.122094	0.140846	0.161944	0.181961	0.204512	0.225241	0.246094	0.264156	0.28478	0.316556	0.340364	0.360448	0.396587	0.424454	0.46276	0.499071	0.550282	0.611832	0.734184	0.918499	1.23047	2.18925
0	0.00332227	0.0270224	0.0478216	0.0661484	0.0837314	0.089696	0.103234	0.12258	0.140957	0.163049	0.182129	0.205078	0.226789	0.246094	0.26489	0.286309	0.31754	0.341363	0.367835	0.400845	0.424669	0.46435	0.4992	0.550585	0.612412	0.736837	0.922682	1.23127	2.2782
0	0.00591137	0.0273734	0.047979	0.0668154	0.0838235	0.0900317	0.103991	0.123504	0.141233	0.163709	0.182256	0.205731	0.22679	0.246094	0.265139	0.29009	0.317714	0.341838	0.367946	0.404847	0.425904	0.468674	0.502463	0.550682	0.615117	0.738281	0.924652	1.24023	2.29183
0	0.00626573	0.0275814	0.0481151	0.0679728	0.0846817	0.090205	0.104036	0.124134	0.141952	0.163949	0.183386	0.208114	0.227008	0.246094	0.266907	0.291033	0.318389	0.342291	0.368235	0.405218	0.426408	0.46888	0.504101	0.552789	0.616054	0.738485	0.929568	1.24796	2.31728
0	0.00628865	0.0275815	0.0481623	0.06865	0.0853354	0.0903364	0.105311	0.12417	0.143142	0.164224	0.183387	0.208153	0.227127	0.246094	0.267252	0.294962	0.320074	0.342445	0.368965	0.40675	0.429591	0.469324	0.504633	0.554619	0.617366	0.738671	0.930817	1.2528	2.34682
0	0.00677093	0.0277317	0.0481983	0.0690357	0.0855021	0.0908104	0.10545	0.124914	0.144577	0.1651	0.183949	0.20827	0.227181	0.246094	0.268455	0.295125	0.320978	0.34252	0.373871	0.407897	0.431014	0.472227	0.504864	0.557163	0.618566	0.738911	0.930897	1.2545	2.37613
0	0.00701367	0.0281874	0.0486465	0.069205	0.0856835	0.0910754	0.105891	0.126002	0.145152	0.16569	0.184122	0.208541	0.228191	0.246094	0.270045	0.295813	0.322682	0.348029	0.374071	0.408291	0.434657	0.472331	0.508354	0.557955	0.622308	0.740165	0.935883	1.25484	2.40823
0	0.00739306	0.0282365	0.0488651	0.0692274	0.0857827	0.0912813	0.106023	0.126901	0.145616	0.165934	0.184355	0.208807	0.231161	0.246736	0.270126	0.298434	0.322989	0.348029	0.37523	0.411694	0.434911	0.472403	0.51019	0.559175	0.622887	0.740656	0.937087	1.25484	2.40993
0	0.00776074	0.0285302	0.049962	0.0694827	0.0858939	0.0915387	0.106836	0.127822	0.145872	0.166402	0.18631	0.208838	0.233218	0.248047	0.271473	0.300012	0.323623	0.348029	0.375702	0.413483	0.435191	0.475557	0.516433	0.559375	0.625482	0.743233	0.944669	1.25484	2.41181
0	0.00862832	0.0287512	0.0500007	0.0695759	0.0865758	0.0923495	0.107063	0.128387	0.145923	0.166517	0.1886	0.210483	0.237602	0.248047	0.273003	0.301959	0.324568	0.348029	0.376462	0.413734	0.43642	0.475839	0.517838	0.562503	0.625805	0.74495	0.963433	1.25831	2.42944
0	0.0109346	0.0288037	0.0500405	0.0712858	0.0868346	0.0945255	0.107245	0.128792	0.146276	0.166675	0.189596	0.210636	0.238172	0.248047	0.27311	0.302797	0.324928	0.350791	0.377305	0.415193	0.444538	0.484253	0.518274	0.564132	0.628797	0.749059	0.970146	1.26356	2.44915
0	0.0119159	0.0290099	0.0509576	0.0714378	0.0870716	0.0954469	0.107752	0.129076	0.147252	0.167061	0.189793	0.210657	0.240662	0.248047	0.275872	0.304097	0.325805	0.350791	0.37901	0.415841	0.446267	0.484574	0.519122	0.565283	0.632317	0.75537	0.974425	1.2648	2.46094
0	0.0121841	0.0294175	0.051232	0.0715914	0.0874264	0.0956651	0.107801	0.129742	0.147466	0.167092	0.190101	0.211963	0.240855	0.248047	0.276606	0.305545	0.326312	0.350791	0.381781	0.419483	0.44629	0.491313	0.519248	0.568689	0.633067	0.758595	0.978415	1.26562	2.46094
0	0.0123974	0.0294555	0.0514214	0.0716083	0.0876982	0.0959407	0.108125	0.130838	0.147972	0.167923	0.190259	0.212952	0.24149	0.248047	0.277406	0.306359	0.326532	0.350791	0.387001	0.419538	0.44664	0.491615	0.521129	0.569893	0.635292	0.773702	0.979424	1.2698	2.46094
0	0.0124082	0.029948	0.0519492	0.0720207	0.0877092	0.0961802	0.108183	0.1311	0.148502	0.168644	0.190336	0.213527	0.241509	0.248047	0.27937	0.307627	0.329281	0.350791	0.387413	0.426091	0.447113	0.492188	0.523857	0.570663	0.635386	0.774482	0.980945	1.2997	2.46094
0	0.0125315	0.0300559	0.0519631	0.0720837	0.0881377	0.0967797	0.108595	0.131312	0.148601	0.169355	0.190639	0.214636	0.241947	0.248047	0.281544	0.30825	0.33136	0.350791	0.388677	0.430289	0.447554	0.492188	0.523901	0.57412	0.635867	0.776028	0.981393	1.30501	2.50797
0	0.0126019	0.0304791	0.0526365	0.0725665	0.0891156	0.0967997	0.10932	0.131855	0.149199	0.170542	0.191004	0.214756	0.242262	0.248047	0.28234	0.308962	0.332138	0.354707	0.38881	0.430687	0.449971	0.492554	0.525761	0.579682	0.639613	0.776956	0.990442	1.30613	2.55465
0	0.0131453	0.0309846	0.0526935	0.0728375	0.089464	0.0970572	0.109715	0.131944	0.150611	0.171558	0.191076	0.216286	0.243483	0.248047	0.283885	0.30942	0.332167	0.35524	0.390513	0.433038	0.45697	0.494494	0.531262	0.580195	0.641483	0.778217	0.9943	1.31504	2.6422
0	0.0132182	0.0310289	0.0529144	0.0737052	0.0894957	0.0980779	0.110277	0.133135	0.15173	0.171614	0.192867	0.2175	0.243873	0.248047	0.284039	0.311448	0.333121	0.355802	0.391241	0.438454	0.4573	0.494908	0.53394	0.580965	0.642254	0.784391	0.995406	1.32251	2.75141
0	0.0140995	0.031049	0.0532837	0.0740611	0.0895974	0.0987082	0.111505	0.134576	0.153046	0.172437	0.193289	0.217706	0.24474	0.248047	0.287311	0.312634	0.334355	0.357009	0.392842	0.44024	0.459493	0.495082	0.534128	0.582828	0.657334	0.784393	1.00884	1.3241	2.75141
0	0.0141638	0.0311841	0.0538964	0.0742469	0.0897694	0.099531	0.111775	0.134909	0.153048	0.17273	0.193957	0.218674	0.245273	0.248605	0.287793	0.313509	0.334366	0.35714	0.393896	0.440408	0.462755	0.495083	0.536307	0.585881	0.660397	0.785803	1.01106	1.32903	2.75141
0	0.0146508	0.0312352	0.0540265	0.0744022	0.0910927	0.0996355	0.112654	0.136536	0.153403	0.173451	0.194402	0.218803	0.246094	0.253886	0.288103	0.313793	0.335045	0.361814	0.394252	0.440701	0.463074	0.496625	0.536499	0.587535	0.667371	0.797963	1.01467	1.33448	2.77325
0	0.014688	0.0314047	0.0541496	0.0745924	0.0913197	0.0997201	0.113735	0.136704	0.154072	0.173744	0.19487	0.219326	0.246094	0.254282	0.288725	0.314764	0.335255	0.363141	0.397375	0.441018	0.464396	0.502865	0.53765	0.594411	0.66768	0.800719	1.01753	1.33606	2.77325
0	0.0149819	0.0316518	0.0547593	0.0746809	0.0916693	0.0997401	0.115055	0.137644	0.156815	0.174235	0.195349	0.219764	0.246094	0.256001	0.288733	0.315604	0.335816	0.364673	0.397883	0.442088	0.465511	0.50333	0.53933	0.595839	0.673229	0.804133	1.02033	1.34457	2.90929
0	0.0151433	0.0316833	0.0548657	0.0748465	0.0916808	0.100313	0.115437	0.137787	0.157858	0.174421	0.196366	0.221376	0.246094	0.258588	0.288867	0.317395	0.336053	0.367636	0.400069	0.44367	0.46632	0.507398	0.540938	0.596388	0.674649	0.806183	1.02228	1.34765	3.0774
0	0.0154005	0.0317043	0.0549898	0.0756401	0.0917296	0.10092	0.116148	0.138079	0.158215	0.174571	0.196676	0.223771	0.246094	0.258811	0.290724	0.31775	0.337421	0.373214	0.400777	0.444259	0.469687	0.511065	0.54292	0.596648	0.68053	0.806582	1.03341	1.37013	3.69141
0	0.0156811	0.0318713	0.0555434	0.0759343	0.0920575	0.101127	0.11639	0.138269	0.158725	0.174834	0.197086	0.224278	0.246094	0.260351	0.291047	0.317813	0.33873	0.375008	0.400955	0.447916	0.471028	0.512987	0.544247	0.596825	0.687659	0.806824	1.03697	1.37568	4.63011
0	0.0160702	0.0320158	0.0556467	0.0764315	0.0922284	0.101142	0.117388	0.139095	0.160729	0.175284	0.197795	0.225217	0.246094	0.260846	0.291366	0.319818	0.340667	0.375551	0.402487	0.449421	0.471055	0.513711	0.545641	0.597299	0.688657	0.808711	1.04141	1.37576	5.28245
0	0.0163694	0.032119	0.0557196	0.076827	0.0925575	0.101318	0.1183	0.139258	0.160945	0.175463	0.20059	0.225564	0.246094	0.26217	0.292145	0.322662	0.340888	0.376011	0.403524	0.449696	0.471466	0.516813	0.550282	0.597491	0.68897	0.82131	1.04142	1.3895	5.439
0	0.0166295	0.0322253	0.0558411	0.0770303	0.0928325	0.101495	0.11851	0.140397	0.160984	0.175726	0.20084	0.225583	0.246094	0.262453	0.292937	0.323828	0.342329	0.377309	0.40366	0.450119	0.472985	0.518485	0.550282	0.603135	0.689199	0.821345	1.04954	1.39699	5.49418
0	0.016733	0.0324118	0.0558977	0.0771238	0.0930921	0.101627	0.118518	0.140508	0.161126	0.176343	0.201096	0.226115	0.246094	0.262966	0.2942	0.324162	0.344323	0.378815	0.404161	0.452205	0.47613	0.521888	0.552921	0.607067	0.693487	0.831617	1.05849	1.39825	6.6904
0	0.0171194	0.0326485	0.0560701	0.0773614	0.0931029	0.10164	0.119304	0.140514	0.161359	0.176794	0.201531	0.226838	0.246094	0.263364	0.294415	0.324928	0.345764	0.381376	0.405488	0.452879	0.478535	0.522329	0.553588	0.610125	0.694622	0.831707	1.05938	1.39898	10.6689
0	0.0171384	0.0327707	0.0560755	0.0778908	0.0931601	0.101687	0.119306	0.140862	0.162561	0.177576	0.201703	0.227374	0.246094	0.263651	0.297749	0.32534	0.347928	0.383209	0.405709	0.453122	0.481742	0.523866	0.553809	0.61107	0.695378	0.836556	1.06216	1.40012	11.923
0	0.0172266	0.0327714	0.0562326	0.0784056	0.0932014	0.102079	0.119599	0.141923	0.162677	0.17811	0.202635	0.227941	0.246094	0.264366	0.297894	0.326643	0.348029	0.383827	0.405943	0.453243	0.481749	0.525211	0.554643	0.612991	0.695509	0.839185	1.06475	1.40573	15.7808
0	0.0179446	0.0328482	0.0570695	0.0787093	0.0933598	0.102537	0.119836	0.142866	0.163608	0.178257	0.204247	0.228118	0.246094	0.265113	0.298047	0.328106	0.348029	0.384038	0.406293	0.454467	0.481829	0.525761	0.554844	0.61355	0.696058	0.839637	1.06527	1.41157	18.6035
0	0.0180275	0.0329272	0.0571112	0.0788645	0.0939911	0.102961	0.119876	0.143176	0.163664	0.178742	0.204356	0.228244	0.246094	0.265564	0.29838	0.328898	0.348029	0.385391	0.406495	0.454519	0.48198	0.52762	0.555099	0.614984	0.696889	0.843963	1.0685	1.41492	23.7421
0	0.0180682	0.0332331	0.0576125	0.0794888	0.0941865	0.103357	0.119934	0.143504	0.163665	0.178965	0.204589	0.229103	0.246094	0.265783	0.300203	0.329555	0.348648	0.386321	0.408124	0.454979	0.484523	0.529516	0.555275	0.615969	0.701583	0.856709	1.06959	1.4183	28.633
0	0.0181418	0.0342188	0.0582551	0.0798256	0.0943057	0.10435	0.120012	0.143852	0.164305	0.179978	0.205052	0.229598	0.246094	0.267086	0.30042	0.33107	0.349432	0.38728	0.409473	0.45854	0.485034	0.536676	0.557392	0.617442	0.709355	0.858597	1.07112	1.42094	35.0791
0	0.0188226	0.0342331	0.058764	0.0798495	0.0945424	0.10467	0.120221	0.144011	0.164384	0.180135	0.205557	0.230958	0.246094	0.267283	0.300805	0.331793	0.349454	0.388349	0.41046	0.458859	0.486204	0.536788	0.564979	0.618187	0.715213	0.862146	1.07647	1.42325	35.4221
0	0.0189412	0.0342415	0.0587944	0.0800138	0.0957562	0.105007	0.120513	0.144161	0.16536	0.18043	0.20646	0.231718	0.246094	0.269205	0.304545	0.333394	0.350791	0.389327	0.411517	0.460663	0.490048	0.537515	0.565393	0.622469	0.716704	0.865595	1.07674	1.42988	36.1587
0	0.0189432	0.0342939	0.0590221	0.0801484	0.0959807	0.105146	0.120695	0.144459	0.165873	0.181103	0.206608	0.231896	0.246094	0.270141	0.306352	0.338875	0.350791	0.390449	0.412782	0.460706	0.490694	0.539477	0.566717	0.624019	0.722866	0.877804	1.07822	1.43866	36.8572
0	0.0189676	0.0345137	0.059687	0.080181	0.0965229	0.105295	0.120819	0.145138	0.16661	0.181272	0.206827	0.231919	0.246094	0.270213	0.306595	0.340247	0.350791	0.391384	0.413698	0.461716	0.492188	0.539557	0.568	0.624342	0.723336	0.878114	1.07924	1.44109	36.9997
0	0.0194184	0.0349687	0.0598329	0.080649	0.0974097	0.105452	0.121713	0.145872	0.166764	0.181648	0.206879	0.232777	0.246094	0.270342	0.306819	0.341705	0.350791	0.393043	0.415204	0.462131	0.493319	0.540113	0.569813	0.631531	0.724418	0.883998	1.08475	1.44976	47.3104
0	0.0197278	0.0351462	0.0600107	0.0807188	0.0974761	0.105926	0.122438	0.14611	0.166794	0.181753	0.207427	0.233237	0.246094	0.271588	0.306821	0.342217	0.352157	0.393408	0.415809	0.46372	0.494961	0.541912	0.571484	0.633004	0.726077	0.885471	1.08818	1.45088	47.9727
0	0.0198407	0.0351604	0.0602559	0.080919	0.0978226	0.105961	0.122927	0.146737	0.167628	0.182616	0.208407	0.233773	0.246094	0.273174	0.30707	0.342682	0.352758	0.396197	0.419146	0.464003	0.497839	0.543995	0.57172	0.635518	0.728258	0.894342	1.08881	1.45248	51.8582
0	0.0203221	0.035172	0.0602735	0.0812822	0.0979387	0.106218	0.123	0.146752	0.168758	0.182707	0.208862	0.233814	0.246094	0.273212	0.307586	0.343085	0.353605	0.396658	0.423361	0.464533	0.500388	0.544226	0.575845	0.636897	0.734941	0.894522	1.08897	1.45923	54.4231
0	0.0204191	0.0356135	0.0604376	0.0815105	0.0981874	0.106478	0.123076	0.146862	0.170764	0.183219	0.209203	0.234572	0.248047	0.274239	0.307726	0.343507	0.354836	0.39711	0.42359	0.467339	0.505477	0.544285	0.577714	0.637327	0.73581	0.899486	1.08898	1.47486	55.5349
0	0.0206722	0.035659	0.0605816	0.0818835	0.0983474	0.107209	0.123353	0.147564	0.171614	0.183675	0.20935	0.235098	0.248047	0.277414	0.30825	0.34397	0.356144	0.398997	0.424679	0.468053	0.508391	0.5466	0.578633	0.638575	0.735962	0.908284	1.09193	1.47656	61.7649
0	0.020927	0.0359341	0.0610373	0.0819108	0.0986235	0.107651	0.123983	0.147588	0.171971	0.183689	0.20963	0.235187	0.248047	0.279006	0.309257	0.344769	0.356706	0.399539	0.425152	0.469939	0.509224	0.547507	0.578653	0.641583	0.735989	0.915349	1.10119	1.47656	64.4144
0	0.0209992	0.0360603	0.0611693	0.0821464	0.0989288	0.107689	0.124605	0.147599	0.172154	0.184445	0.209747	0.235607	0.248047	0.280452	0.309327	0.345483	0.356766	0.401041	0.425582	0.470872	0.510309	0.547644	0.580469	0.644414	0.736365	0.917148	1.10604	1.47762	68.1859
0	0.021789	0.0361064	0.0622219	0.082278	0.0990783	0.108185	0.12467	0.148343	0.172704	0.185251	0.210475	0.235915	0.248047	0.281587	0.309458	0.346521	0.358334	0.402237	0.431216	0.471109	0.510847	0.548241	0.58316	0.649622	0.736702	0.923038	1.10799	1.48828	70.2715
0	0.0217988	0.0362638	0.0622695	0.0823511	0.0992989	0.108499	0.125324	0.148829	0.172778	0.185557	0.211	0.236486	0.248047	0.281778	0.310141	0.346899	0.359763	0.404093	0.434333	0.471288	0.51167	0.548739	0.583789	0.654383	0.738124	0.927128	1.10809	1.49409	71.3499
0	0.0222728	0.0365855	0.0628771	0.0824136	0.0994326	0.109211	0.125672	0.149348	0.173296	0.185827	0.212198	0.236985	0.248047	0.282578	0.310642	0.348029	0.361608	0.404146	0.435224	0.473529	0.512367	0.549183	0.595396	0.654563	0.742159	0.937263	1.1093	1.49654	86.0782
0	0.0225206	0.036702	0.0632849	0.0824723	0.0998331	0.10946	0.126858	0.149479	0.174117	0.186044	0.21228	0.236993	0.248047	0.284757	0.311019	0.348029	0.364286	0.404834	0.435375	0.475405	0.512776	0.551294	0.595543	0.654749	0.747856	0.940214	1.1111	1.49919	105.876
0	0.0225283	0.036805	0.0633093	0.0831063	0.100264	0.109492	0.128579	0.149807	0.174399	0.186124	0.212332	0.237139	0.248047	0.284867	0.311338	0.348029	0.365306	0.406118	0.435728	0.479109	0.513345	0.552749	0.596335	0.65791	0.751013	0.944852	1.11581	1.50162
0	0.0229013	0.0370177	0.0634387	0.0831707	0.100614	0.110293	0.129205	0.151297	0.174623	0.186504	0.213277	0.239559	0.248047	0.285085	0.312634	0.348029	0.365693	0.406412	0.436287	0.479702	0.513982	0.554403	0.596489	0.658759	0.754915	0.945226	1.116	1.50634
0	0.0229491	0.0370633	0.0635125	0.0831748	0.100736	0.11093	0.129731	0.151647	0.175366	0.18658	0.21582	0.239659	0.248047	0.285217	0.31332	0.348029	0.367435	0.406495	0.445726	0.483298	0.514101	0.55465	0.596589	0.659634	0.755667	0.94539	1.12158	1.50997
0	0.0229597	0.0376284	0.0635363	0.0839675	0.100962	0.111122	0.129788	0.151947	0.175431	0.186703	0.216461	0.240303	0.248047	0.286118	0.315013	0.348029	0.367454	0.406823	0.44705	0.484276	0.514866	0.55465	0.599605	0.662035	0.756482	0.951517	1.12618	1.51693
0	0.0229759	0.0376953	0.0637165	0.0840346	0.101199	0.11262	0.129832	0.152066	0.17559	0.18782	0.217134	0.242778	0.248777	0.286602	0.315768	0.348029	0.368085	0.408199	0.451671	0.485196	0.515735	0.55465	0.603031	0.662093	0.763896	0.952206	1.12996	1.51806
0	0.023018	0.0377455	0.0644118	0.0852338	0.10133	0.112814	0.130286	0.152347	0.177353	0.188001	0.217344	0.243059	0.249132	0.286974	0.316853	0.348029	0.368366	0.408535	0.452926	0.485507	0.515987	0.55465	0.603539	0.662352	0.766057	0.960171	1.13723	1.52715
0	0.0234297	0.0378643	0.064433	0.0853041	0.101611	0.113427	0.131056	0.153524	0.177892	0.188757	0.217656	0.244581	0.249411	0.287062	0.317047	0.348029	0.369601	0.409326	0.453391	0.486267	0.516159	0.555104	0.604284	0.663667	0.772144	0.961809	1.13961	1.52835
0	0.02351	0.0378992	0.0644376	0.0853211	0.101662	0.113825	0.131059	0.153707	0.177957	0.189266	0.218222	0.24459	0.251909	0.287315	0.317197	0.348029	0.369834	0.409798	0.453494	0.487557	0.518424	0.555351	0.604519	0.678407	0.781459	0.964188	1.14168	1.5315
0	0.0235714	0.0390128	0.0644794	0.0866726	0.101747	0.114295	0.133267	0.153992	0.17811	0.189542	0.218385	0.244725	0.252139	0.287789	0.318091	0.348291	0.373052	0.410641	0.457397	0.488098	0.523605	0.558054	0.607505	0.682143	0.784391	0.969738	1.15971	1.53669
0	0.0236589	0.03904	0.0646157	0.0870112	0.101891	0.115288	0.134066	0.15406	0.178959	0.190909	0.218852	0.244745	0.253017	0.288725	0.318227	0.348459	0.373677	0.411422	0.457925	0.490536	0.524482	0.560542	0.613066	0.682555	0.784393	0.971064	1.16436	1.56695
0	0.0239158	0.0391981	0.064803	0.0872079	0.102561	0.115491	0.134568	0.154229	0.179844	0.191367	0.219692	0.244957	0.253135	0.289319	0.318671	0.349375	0.374982	0.412021	0.458211	0.491459	0.524571	0.560625	0.616354	0.685943	0.784393	0.978087	1.16553	1.57577
0	0.0239793	0.040053	0.0650992	0.0873758	0.102774	0.115598	0.134888	0.154784	0.180119	0.192614	0.219866	0.245861	0.253229	0.289707	0.320199	0.349691	0.375268	0.412055	0.458271	0.491657	0.525608	0.562029	0.616439	0.686497	0.786151	0.98334	1.16722	1.57819
0	0.0239954	0.0407599	0.0654288	0.087571	0.104129	0.115915	0.135618	0.156674	0.180199	0.192689	0.219898	0.246094	0.253782	0.290583	0.322114	0.350791	0.376659	0.412631	0.459812	0.492188	0.53149	0.564394	0.616655	0.688494	0.801214	0.983488	1.17014	1.5832
0	0.0242973	0.0408582	0.0655374	0.0879518	0.105795	0.116462	0.13575	0.156726	0.180743	0.193598	0.220096	0.246094	0.253852	0.291527	0.322284	0.350791	0.377602	0.41268	0.461789	0.492188	0.531642	0.565649	0.620206	0.688649	0.804527	0.984375	1.17145	1.58658
0	0.0243285	0.0408934	0.0656495	0.0886598	0.106106	0.117207	0.136163	0.157224	0.181341	0.193936	0.220333	0.246094	0.254279	0.293756	0.322678	0.350791	0.378254	0.412719	0.462358	0.492188	0.534412	0.56572	0.622737	0.688849	0.80499	0.985802	1.17403	1.59271
0	0.0243732	0.0411619	0.0656689	0.0888399	0.106292	0.117548	0.136544	0.157322	0.181382	0.194315	0.220888	0.246094	0.256028	0.294156	0.322702	0.350791	0.379054	0.413812	0.462783	0.492188	0.537669	0.566222	0.625032	0.69112	0.805379	0.986829	1.17975	1.59954
0	0.0243884	0.0413849	0.0658909	0.0892484	0.106428	0.118507	0.136719	0.157411	0.181924	0.194554	0.220978	0.246094	0.25853	0.294262	0.322913	0.350791	0.379819	0.414395	0.463925	0.492188	0.538476	0.569861	0.626499	0.692023	0.806133	0.988472	1.1849	1.60189
0	0.0245431	0.041739	0.0660178	0.0900263	0.106619	0.118624	0.136849	0.157737	0.182611	0.196041	0.22206	0.246094	0.258789	0.295171	0.323416	0.350791	0.379953	0.414404	0.464148	0.492188	0.541886	0.570897	0.62932	0.692099	0.812203	0.994372	1.18524	1.61055
0	0.0246097	0.0417593	0.0661596	0.0900397	0.107266	0.119122	0.136999	0.158243	0.18263	0.196125	0.222542	0.246094	0.261666	0.295358	0.323431	0.350791	0.379973	0.415081	0.465227	0.492824	0.544617	0.57131	0.630475	0.695456	0.816171	1.00036	1.19606	1.61485
0	0.0250161	0.0422402	0.0661934	0.0900527	0.107321	0.119376	0.137296	0.159473	0.183772	0.196257	0.222543	0.246094	0.262065	0.295715	0.323724	0.350791	0.382576	0.416109	0.465939	0.493112	0.546353	0.572871	0.630608	0.696058	0.817415	1.00054	1.19908	1.62015
0	0.0251401	0.0424131	0.0662327	0.090362	0.107628	0.119523	0.137485	0.159847	0.18447	0.196464	0.223517	0.246094	0.263102	0.295821	0.324795	0.351413	0.382651	0.416147	0.466997	0.500898	0.5466	0.575323	0.632193	0.696188	0.822359	1.00296	1.19969	1.62939
0	0.0251762	0.0424888	0.0662377	0.0905441	0.107651	0.119798	0.138313	0.16023	0.185701	0.197222	0.223765	0.246094	0.263737	0.295829	0.325109	0.35156	0.382838	0.416783	0.467138	0.501352	0.548001	0.575473	0.632924	0.696555	0.824061	1.00449	1.2007	1.64768
0	0.0252747	0.0429943	0.0662621	0.090853	0.107748	0.120016	0.138324	0.160837	0.185866	0.198546	0.225317	0.246094	0.263778	0.29592	0.326868	0.356528	0.383108	0.417022	0.467146	0.502277	0.54899	0.579772	0.63338	0.702249	0.833781	1.01364	1.20367	1.65879
0	0.0253112	0.0435036	0.0669952	0.0911452	0.107813	0.12005	0.138925	0.16219	0.186734	0.19869	0.225845	0.246094	0.263856	0.296397	0.326929	0.356987	0.383389	0.418044	0.469782	0.50243	0.549342	0.579772	0.635344	0.703406	0.836385	1.01391	1.20868	1.69424
0	0.0254442	0.0435819	0.0675176	0.0912195	0.107814	0.120197	0.139443	0.162619	0.187244	0.200749	0.225922	0.246094	0.263939	0.297402	0.32714	0.357605	0.385796	0.418472	0.47066	0.5028	0.550282	0.580036	0.638183	0.71094	0.841284	1.01477	1.21124	1.70828
0	0.0255763	0.044297	0.0678162	0.0918672	0.108017	0.120672	0.139473	0.16344	0.187921	0.201056	0.226333	0.246094	0.264004	0.298286	0.327205	0.357706	0.387142	0.420119	0.471083	0.503564	0.550282	0.581388	0.639604	0.715175	0.8433	1.01607	1.21267	1.71423
0	0.0261607	0.044308	0.0679309	0.0922112	0.108053	0.121009	0.139912	0.164726	0.187943	0.202571	0.227458	0.246094	0.264809	0.298426	0.327998	0.358339	0.389383	0.422006	0.471508	0.504595	0.550282	0.590431	0.640656	0.722772	0.849067	1.01956	1.21931	1.73361
0	0.0265468	0.0443776	0.0683071	0.0922882	0.108074	0.121826	0.140004	0.165508	0.187943	0.203204	0.228118	0.246094	0.265494	0.29889	0.328369	0.359678	0.39067	0.423025	0.474233	0.505237	0.550282	0.591219	0.642699	0.723148	0.853453	1.02272	1.22392	1.73845
0	0.0266333	0.044641	0.0687436	0.092979	0.108449	0.121889	0.14029	0.166341	0.188393	0.203393	0.228125	0.246094	0.26628	0.298958	0.329225	0.360413	0.391756	0.423247	0.475681	0.505891	0.550282	0.593641	0.643479	0.725167	0.853812	1.02405	1.23047	1.74015
0	0.0267125	0.0454103	0.0689112	0.0931648	0.108819	0.122388	0.140295	0.166483	0.188806	0.203854	0.228283	0.246094	0.266561	0.300555	0.330507	0.361001	0.393	0.424349	0.476582	0.506661	0.550405	0.594026	0.645552	0.726228	0.855001	1.02576	1.23323	1.74015
0	0.0267997	0.0454516	0.0689117	0.0933357	0.108903	0.122574	0.141032	0.16673	0.188855	0.204249	0.229085	0.246094	0.268399	0.301512	0.332298	0.361815	0.393408	0.425758	0.478245	0.507009	0.551151	0.594521	0.645599	0.727772	0.858674	1.03085	1.23445	1.74015
0	0.0268132	0.0455514	0.068932	0.0937402	0.109555	0.122776	0.142025	0.167056	0.189937	0.204992	0.229757	0.246094	0.268637	0.301512	0.332616	0.361888	0.393782	0.426533	0.478495	0.507169	0.552749	0.596742	0.646871	0.731965	0.867132	1.03195	1.23726	1.75396
0	0.0269652	0.0456768	0.0692283	0.0937428	0.109638	0.123068	0.142028	0.167681	0.190004	0.206023	0.230668	0.246094	0.269829	0.301631	0.334237	0.362945	0.394407	0.428727	0.481257	0.509338	0.55465	0.596942	0.647711	0.736504	0.873422	1.0328	1.23805	1.76559
0	0.0271365	0.0458478	0.0695573	0.0937563	0.109702	0.123989	0.142275	0.167956	0.190702	0.206608	0.230803	0.246094	0.270126	0.303894	0.3345	0.363126	0.394895	0.432583	0.483303	0.511443	0.55465	0.597151	0.652153	0.737563	0.876575	1.03344	1.24376	1.76564
0.000389108	0.0272404	0.0463039	0.0697026	0.0940584	0.109871	0.124008	0.142601	0.169008	0.190759	0.207084	0.23086	0.246094	0.271284	0.304847	0.336076	0.364031	0.395006	0.432985	0.484452	0.51157	0.55465	0.598419	0.659908	0.738629	0.87686	1.03469	1.2453	1.77616
0.000615234	0.0278872	0.0467504	0.069726	0.0943319	0.109872	0.124276	0.143196	0.169258	0.190873	0.207447	0.231111	0.246094	0.272447	0.306415	0.337622	0.365895	0.395125	0.433778	0.484686	0.511667	0.555884	0.598866	0.660429	0.739201	0.880781	1.03943	1.24734	1.79161
0.00196875	0.0279341	0.0468279	0.0697359	0.0944082	0.109916	0.124694	0.143562	0.169283	0.190923	0.207848	0.231917	0.246094	0.272454	0.306948	0.338468	0.366382	0.395543	0.433875	0.485613	0.511761	0.55808	0.599914	0.66164	0.741176	0.8855	1.04159	1.24962	1.80214
0.00236365	0.0280142	0.0471323	0.0698673	0.0945621	0.110643	0.124937	0.145715	0.169593	0.19183	0.208331	0.233018	0.246094	0.272651	0.30825	0.339587	0.366431	0.396667	0.436891	0.48613	0.512565	0.558534	0.60012	0.666995	0.741635	0.88604	1.04462	1.25241	1.81336
0.00337875	0.0280353	0.0472271	0.0708348	0.0952374	0.110668	0.125789	0.145728	0.170085	0.191911	0.208887	0.233705	0.246094	0.273444	0.308779	0.33968	0.366465	0.397612	0.437585	0.486397	0.515214	0.558905	0.600539	0.669069	0.742675	0.888745	1.04588	1.25484	1.81501
0.00379056	0.0280657	0.04838	0.0708522	0.0953769	0.110885	0.125848	0.145872	0.170355	0.192665	0.211011	0.234029	0.246094	0.273626	0.308794	0.340761	0.366796	0.397842	0.43915	0.48666	0.515496	0.559734	0.602615	0.670813	0.744067	0.888997	1.05102	1.25484	1.82424
0.00406055	0.0282783	0.0486832	0.0711007	0.095539	0.111015	0.127134	0.145947	0.170689	0.192793	0.211491	0.234102	0.246094	0.274126	0.309803	0.342578	0.36761	0.400347	0.439422	0.487474	0.517065	0.559771	0.602905	0.671492	0.749195	0.893979	1.05286	1.2648	1.83331
0.00418359	0.0283577	0.0489462	0.0712085	0.0955486	0.11155	0.127558	0.146721	0.170738	0.193241	0.212045	0.234151	0.246409	0.27465	0.310244	0.34265	0.367641	0.401593	0.443595	0.490336	0.517514	0.560494	0.603757	0.671992	0.753032	0.894384	1.05672	1.26793	1.83838
0.00418359	0.0286505	0.0490616	0.0712704	0.0958605	0.111597	0.128671	0.147105	0.171581	0.193413	0.213328	0.234831	0.246487	0.275392	0.310761	0.344506	0.368992	0.402372	0.445618	0.49108	0.518446	0.561349	0.604745	0.672536	0.754038	0.895359	1.05761	1.2685	1.83869
0.00441085	0.028653	0.049342	0.071278	0.0962859	0.111627	0.12976	0.149055	0.171614	0.193587	0.213603	0.235286	0.248047	0.277178	0.311192	0.345909	0.369819	0.403294	0.446134	0.491258	0.518869	0.562643	0.607779	0.673581	0.75566	0.904932	1.05849	1.27044	1.8482
0.00506887	0.0286702	0.0496112	0.0713046	0.09637	0.111744	0.130364	0.149694	0.172103	0.193683	0.213642	0.23558	0.248047	0.27808	0.311838	0.346327	0.370703	0.403523	0.446534	0.492188	0.519292	0.565929	0.610284	0.674856	0.764966	0.907315	1.05872	1.27109	1.85017
0.00529102	0.0286773	0.0497111	0.0714521	0.0965184	0.111773	0.130469	0.149889	0.173018	0.193691	0.213843	0.23615	0.248047	0.278902	0.312634	0.346877	0.371025	0.405619	0.447643	0.492188	0.521967	0.566255	0.61267	0.676378	0.766479	0.913919	1.0592	1.27195	1.85194
0.00529102	0.0288027	0.0499894	0.0719656	0.0966539	0.11188	0.130735	0.150095	0.173757	0.193725	0.214606	0.236257	0.248047	0.279086	0.313084	0.347955	0.371614	0.405778	0.44858	0.492188	0.522188	0.567	0.613058	0.677005	0.766968	0.914614	1.05938	1.28231	1.85467
0.00534228	0.0290604	0.0502123	0.0720811	0.0969866	0.112128	0.130754	0.150211	0.173838	0.193894	0.214656	0.237873	0.248047	0.279686	0.313509	0.348029	0.371628	0.405958	0.449362	0.492188	0.523431	0.570805	0.613143	0.67707	0.767067	0.915717	1.06128	1.28269	1.87082
0.00543585	0.0291997	0.0504145	0.0722311	0.0970387	0.112243	0.13218	0.150454	0.174015	0.194074	0.216124	0.238099	0.248047	0.280303	0.316842	0.348029	0.373284	0.406706	0.449678	0.492188	0.525234	0.574782	0.61557	0.681149	0.7678	0.919791	1.0633	1.28829	1.87277
0.00566016	0.0293156	0.0504674	0.0732362	0.0972012	0.112488	0.132741	0.150693	0.174733	0.194431	0.216203	0.238712	0.248047	0.280356	0.316888	0.348029	0.374595	0.406901	0.449974	0.492188	0.525323	0.575263	0.616213	0.681469	0.768553	0.920388	1.06364	1.29143	1.88125
0.00577796	0.0298134	0.0504789	0.0732486	0.0973724	0.112644	0.132791	0.150747	0.175248	0.194554	0.216647	0.238882	0.248047	0.280491	0.316938	0.348029	0.375786	0.407718	0.451453	0.492188	0.526603	0.576815	0.618888	0.687319	0.76984	0.931359	1.06398	1.29476	1.91833
0.00617813	0.0298824	0.0504978	0.0733398	0.0974243	0.113502	0.133211	0.15082	0.175471	0.194759	0.217084	0.240046	0.248092	0.280641	0.317029	0.348029	0.375787	0.410641	0.451624	0.492552	0.528325	0.577765	0.620196	0.68804	0.775675	0.934521	1.06759	1.29536	1.92205
0.00622695	0.0303128	0.050727	0.0734998	0.0979045	0.113514	0.133875	0.151074	0.176306	0.195214	0.218296	0.240152	0.248729	0.280783	0.31736	0.348029	0.375968	0.410726	0.452389	0.493528	0.530407	0.578786	0.621729	0.689046	0.776421	0.938219	1.07009	1.29598	1.92456
0.00639489	0.0303483	0.0507532	0.0736039	0.0979486	0.113865	0.134359	0.151357	0.176715	0.195719	0.218378	0.240652	0.249053	0.281603	0.318127	0.348029	0.376898	0.410771	0.452631	0.493835	0.531363	0.579748	0.62302	0.690175	0.778844	0.938878	1.07294	1.29991	1.92987
0.00653887	0.0304063	0.0511829	0.0736669	0.0985252	0.114115	0.134438	0.151671	0.177447	0.195894	0.219071	0.240788	0.24924	0.281968	0.318154	0.348029	0.377045	0.412986	0.45296	0.497882	0.534147	0.580263	0.624448	0.692846	0.779767	0.939984	1.07423	1.30213	1.9474
0.00676758	0.0305754	0.0514213	0.0740599	0.0985756	0.11456	0.134492	0.152072	0.177693	0.196506	0.219443	0.241559	0.249981	0.282288	0.318256	0.348029	0.377145	0.416426	0.453336	0.498992	0.534886	0.580479	0.628742	0.693507	0.780583	0.9409	1.07583	1.31254	1.96628
0.00742881	0.0305843	0.0514284	0.0745714	0.0985768	0.114647	0.13557	0.152413	0.177877	0.196546	0.220037	0.2426	0.250975	0.282541	0.318726	0.348029	0.377999	0.416442	0.453338	0.499037	0.534949	0.581873	0.629024	0.6969	0.7813	0.941894	1.07633	1.31337	1.96664
0.00750586	0.0310715	0.0519382	0.0749856	0.0988043	0.11472	0.13592	0.153551	0.178048	0.196886	0.220878	0.242875	0.251305	0.284494	0.320188	0.348029	0.378564	0.418458	0.453371	0.499198	0.537096	0.582691	0.629467	0.698956	0.781344	0.94307	1.07769	1.32338	1.96972
0.00751795	0.031091	0.0519896	0.0750021	0.0990298	0.114847	0.135923	0.154442	0.178675	0.197141	0.221163	0.242944	0.251882	0.28468	0.320751	0.348582	0.379718	0.422046	0.453391	0.499227	0.537687	0.583282	0.629939	0.699663	0.782283	0.943421	1.08006	1.32526	1.97675
0.00754208	0.031289	0.0521585	0.075022	0.0990915	0.114921	0.136268	0.154556	0.179101	0.197954	0.221304	0.243314	0.25303	0.285442	0.320927	0.348875	0.379918	0.422277	0.455153	0.499426	0.539084	0.585402	0.631014	0.700722	0.784391	0.945885	1.0822	1.32526	1.98011
0.00789037	0.0313354	0.0521703	0.075101	0.0991032	0.115335	0.136657	0.154655	0.179569	0.198923	0.221957	0.243641	0.25314	0.28641	0.321872	0.350472	0.380009	0.423245	0.45516	0.499883	0.539479	0.585421	0.632432	0.701583	0.784393	0.950591	1.08362	1.33039	2.004
0.00812109	0.0314733	0.0525527	0.0755577	0.0991536	0.115552	0.137086	0.154686	0.179818	0.199364	0.222095	0.244258	0.25316	0.287046	0.322368	0.350791	0.380809	0.423691	0.455272	0.50052	0.540334	0.587594	0.633596	0.701583	0.784393	0.951419	1.08619	1.33617	2.01198
0.00835451	0.0314762	0.05285	0.0755589	0.0993275	0.115773	0.137322	0.155058	0.181431	0.200306	0.223672	0.245601	0.253516	0.287626	0.323458	0.350791	0.381194	0.423711	0.455684	0.50052	0.545104	0.589471	0.63492	0.70644	0.789088	0.951982	1.08681	1.34278	2.02934
0.00843387	0.0316017	0.052903	0.0755906	0.0995051	0.11586	0.137489	0.155061	0.181538	0.200498	0.224122	0.245726	0.254012	0.287971	0.32353	0.350791	0.381528	0.42433	0.456029	0.500581	0.545856	0.592476	0.635088	0.706652	0.793688	0.952098	1.08759	1.34729	2.03478
0.00847506	0.0316585	0.052905	0.0758904	0.0995459	0.115881	0.137838	0.155352	0.181574	0.200707	0.224321	0.24589	0.254249	0.288117	0.323822	0.350791	0.381535	0.426576	0.45666	0.501276	0.5466	0.595639	0.635404	0.709314	0.80126	0.95228	1.08945	1.34867	2.07918
0.00849023	0.0318938	0.0532162	0.0759462	0.0995613	0.116137	0.137849	0.155445	0.181941	0.201746	0.224561	0.246094	0.254664	0.288675	0.324169	0.350791	0.38155	0.42688	0.457712	0.501775	0.548559	0.595724	0.636577	0.709446	0.803932	0.954849	1.09644	1.35575	2.09692
0.00854323	0.0319922	0.053253	0.0765114	0.0996553	0.116483	0.138269	0.156531	0.182019	0.201778	0.225427	0.246094	0.255099	0.288927	0.325368	0.350791	0.38212	0.427134	0.459193	0.50348	0.550282	0.596465	0.637568	0.711032	0.808171	0.956073	1.09855	1.35894	2.10263
0.00856922	0.0320007	0.0532708	0.0768853	0.0997282	0.116515	0.138454	0.156642	0.182459	0.201859	0.226019	0.246094	0.255306	0.289371	0.326983	0.350791	0.382626	0.428856	0.459296	0.50475	0.550282	0.59831	0.638785	0.713856	0.81123	0.956105	1.10386	1.36077	2.10452
0.00870856	0.0321404	0.0534228	0.076927	0.100077	0.11653	0.13877	0.157884	0.182513	0.20252	0.226083	0.246094	0.255517	0.289757	0.327219	0.35217	0.382696	0.430413	0.459994	0.504905	0.550282	0.599041	0.646858	0.714851	0.811936	0.957553	1.10388	1.36137	2.11654
0.00872853	0.0321565	0.0536067	0.0778342	0.100235	0.116673	0.138834	0.159544	0.183376	0.202609	0.22778	0.246094	0.255555	0.290232	0.32729	0.35263	0.385057	0.430496	0.460234	0.505077	0.550282	0.599461	0.652929	0.717289	0.814425	0.958494	1.10394	1.36316	2.11884
0.00886023	0.0324398	0.0536194	0.0779282	0.100542	0.116695	0.138899	0.160002	0.183652	0.202913	0.227852	0.246094	0.256267	0.290327	0.327648	0.352905	0.385156	0.433763	0.461238	0.505255	0.55042	0.60255	0.653648	0.71748	0.821032	0.961564	1.10501	1.36323	2.12469
0.00910297	0.0324958	0.0536264	0.0779434	0.100788	0.116815	0.139058	0.160033	0.183726	0.203116	0.228703	0.246094	0.257077	0.290891	0.329088	0.353679	0.385285	0.434254	0.461307	0.506205	0.551412	0.60311	0.662538	0.71867	0.821822	0.962654	1.10701	1.36888	2.17002
0.00924491	0.0325351	0.0536299	0.0779971	0.101111	0.116834	0.139245	0.160218	0.183813	0.203161	0.228947	0.246094	0.25728	0.29162	0.33088	0.355127	0.385497	0.435163	0.46277	0.510645	0.551887	0.603615	0.663397	0.722795	0.822076	0.963071	1.10807	1.37367	2.21484
0.00937178	0.0326	0.0537991	0.0780184	0.101151	0.116877	0.139378	0.160542	0.18405	0.203866	0.22916	0.246094	0.257302	0.292768	0.331125	0.355396	0.38695	0.435438	0.46598	0.511761	0.55212	0.604504	0.663827	0.723349	0.824904	0.965669	1.11021	1.37857	2.21484
0.00966133	0.0326529	0.0537991	0.0781301	0.101215	0.117676	0.140323	0.162778	0.185359	0.20396	0.229244	0.246094	0.258408	0.293292	0.331454	0.356239	0.386989	0.437761	0.466961	0.512649	0.552749	0.606236	0.663893	0.723728	0.82907	0.966513	1.11748	1.37945	2.24147
0.00999789	0.0326944	0.0538964	0.0781721	0.101243	0.117696	0.140335	0.163768	0.185372	0.204106	0.230012	0.246094	0.259452	0.293489	0.332353	0.356694	0.387826	0.438216	0.467181	0.512684	0.552858	0.606457	0.665291	0.72533	0.829381	0.966588	1.11848	1.37976	2.24156
0.0100906	0.032903	0.0540316	0.0783282	0.10134	0.117728	0.140529	0.164162	0.185472	0.204648	0.230024	0.246094	0.259938	0.294144	0.33242	0.357371	0.388035	0.438305	0.467434	0.512834	0.55465	0.609717	0.666187	0.730394	0.830359	0.967247	1.11939	1.37976	2.24807
0.0103081	0.0329051	0.0542849	0.0783433	0.101642	0.118048	0.140546	0.164274	0.185678	0.204702	0.231199	0.246094	0.260328	0.296614	0.332704	0.358324	0.388744	0.439026	0.467723	0.513135	0.55465	0.610443	0.668586	0.731089	0.830617	0.967333	1.1202	1.39212	2.26493
0.0103359	0.0330742	0.0547625	0.0785561	0.101655	0.118878	0.140592	0.164312	0.185804	0.20477	0.231419	0.246094	0.260552	0.298013	0.333722	0.359162	0.388838	0.441757	0.468123	0.515411	0.55465	0.612162	0.669589	0.731895	0.830662	0.969285	1.12191	1.39516	2.27255
0.0105577	0.0333532	0.0547835	0.078587	0.101863	0.118897	0.140947	0.165177	0.186114	0.204806	0.231451	0.246094	0.260886	0.298588	0.333754	0.359379	0.38888	0.442418	0.468643	0.516271	0.55465	0.614802	0.672709	0.732197	0.834047	0.96958	1.12761	1.39848	2.2801
0.0105806	0.0335684	0.0548367	0.0787024	0.102098	0.119036	0.140972	0.165339	0.18627	0.204947	0.231559	0.246094	0.261267	0.298915	0.33381	0.36003	0.389995	0.442428	0.468677	0.519576	0.55465	0.615933	0.673726	0.733893	0.83838	0.970938	1.12981	1.39971	2.29409
0.0108288	0.0337521	0.055402	0.0789885	0.102366	0.119181	0.141309	0.165406	0.186734	0.205883	0.231785	0.246094	0.261297	0.3002	0.334742	0.360215	0.390366	0.442648	0.46957	0.520281	0.55465	0.616256	0.674288	0.745711	0.843113	0.973736	1.13098	1.40115	2.29826
0.0111383	0.0338424	0.055762	0.0789973	0.102596	0.119472	0.141501	0.166124	0.1874	0.206203	0.231858	0.246094	0.261755	0.300488	0.334848	0.360824	0.391164	0.443853	0.470136	0.520304	0.554651	0.61638	0.674491	0.753987	0.844673	0.976309	1.13585	1.40159	2.30841
0.0111492	0.0338745	0.0558775	0.079534	0.102946	0.11965	0.141513	0.166331	0.187815	0.206524	0.232146	0.246094	0.262841	0.301594	0.336104	0.361266	0.391777	0.444875	0.471936	0.520895	0.554744	0.618686	0.677052	0.756138	0.845199	0.976885	1.137	1.40309	2.33465
0.0112344	0.0338989	0.0559583	0.0796033	0.103023	0.120272	0.142365	0.16634	0.188438	0.206577	0.23257	0.246094	0.264497	0.302189	0.33618	0.361342	0.392107	0.445231	0.473634	0.521805	0.555389	0.619013	0.677652	0.756994	0.850603	0.978407	1.13805	1.40767	2.36734
0.011323	0.0339692	0.05605	0.0796213	0.103241	0.120572	0.142564	0.166815	0.188463	0.207447	0.232721	0.246094	0.265506	0.303286	0.337367	0.361664	0.393382	0.445267	0.474403	0.523126	0.556776	0.620678	0.678424	0.758796	0.859551	0.979153	1.13818	1.40801	2.37531
0.0114902	0.0342311	0.056069	0.0796573	0.103487	0.120998	0.142613	0.167032	0.188921	0.207604	0.233119	0.246094	0.265899	0.304263	0.33777	0.361708	0.394125	0.446496	0.475436	0.524003	0.559769	0.621154	0.679414	0.759931	0.864678	0.98099	1.1385	1.41201	2.40621
0.0115546	0.0345584	0.056144	0.0799336	0.10353	0.121045	0.142892	0.167226	0.189004	0.207615	0.233206	0.246331	0.268517	0.305573	0.338985	0.361895	0.394745	0.447523	0.475863	0.525876	0.562274	0.624634	0.682825	0.765547	0.865411	0.982637	1.13855	1.4137	2.43079
0.0116895	0.0347256	0.0563595	0.0802713	0.104216	0.121047	0.14308	0.167848	0.189128	0.20781	0.233286	0.246501	0.269114	0.306838	0.339248	0.3621	0.394809	0.44875	0.476809	0.526064	0.562283	0.625362	0.683542	0.766629	0.865534	0.982773	1.13902	1.41458	2.44228
0.0120517	0.0349239	0.0565854	0.0805867	0.104363	0.121201	0.143412	0.168372	0.189761	0.207846	0.234298	0.247607	0.270211	0.307148	0.339756	0.364121	0.39545	0.449481	0.477308	0.526339	0.565375	0.626941	0.685496	0.768348	0.867427	0.983104	1.14119	1.41625	2.46094
0.0120586	0.0350617	0.0566903	0.0809631	0.104705	0.122191	0.143414	0.169272	0.189787	0.208091	0.234636	0.247908	0.27117	0.307262	0.3405	0.364936	0.395999	0.4499	0.478017	0.526387	0.565724	0.627759	0.687794	0.772038	0.868977	0.98541	1.14256	1.42141	2.47321
0.0125006	0.0353982	0.0568152	0.0816253	0.105145	0.122702	0.14357	0.16938	0.189971	0.208211	0.234645	0.248047	0.271411	0.307332	0.340962	0.365129	0.396138	0.450922	0.478233	0.527846	0.566454	0.627957	0.689095	0.772108	0.870056	0.988368	1.144	1.4277	2.53086
0.0126565	0.0353982	0.0568749	0.0818054	0.105324	0.122785	0.143756	0.169477	0.190535	0.209214	0.234915	0.248047	0.271482	0.308001	0.341058	0.365675	0.397333	0.451871	0.47888	0.529275	0.570988	0.630402	0.69039	0.77418	0.872503	0.988503	1.14888	1.42988	2.53369
0.0127239	0.0354987	0.0571588	0.0819394	0.105366	0.122841	0.144089	0.169477	0.19082	0.210307	0.235857	0.248047	0.271639	0.308449	0.341713	0.366014	0.397817	0.452022	0.481039	0.529822	0.571245	0.634074	0.690982	0.77755	0.873841	0.989412	1.14967	1.43496	2.53369
0.0127459	0.0355997	0.0574202	0.0820701	0.105463	0.123138	0.144477	0.1697	0.190923	0.210604	0.235895	0.248047	0.271761	0.308857	0.342051	0.366065	0.398327	0.452262	0.481443	0.531145	0.573064	0.635535	0.691508	0.777594	0.878791	0.991147	1.14984	1.43815	2.57177
0.0129346	0.0359771	0.0574736	0.0821707	0.105522	0.123523	0.144507	0.169821	0.191235	0.210664	0.236825	0.248047	0.271971	0.309589	0.34212	0.36668	0.401288	0.452661	0.485443	0.531666	0.573077	0.636006	0.691846	0.778217	0.87906	0.993717	1.15097	1.44157	2.58927
0.0130835	0.0361791	0.0576334	0.0822024	0.105744	0.123699	0.145223	0.170193	0.191372	0.211495	0.237896	0.248047	0.272248	0.310045	0.343457	0.369953	0.401306	0.452681	0.485584	0.532061	0.573429	0.636129	0.693968	0.779994	0.880401	0.993794	1.15462	1.45494	2.58969
0.0131219	0.0362807	0.0576829	0.0824723	0.106145	0.123751	0.145303	0.170488	0.191382	0.211847	0.239172	0.248047	0.272492	0.310802	0.34468	0.370032	0.402302	0.453565	0.485853	0.532569	0.573753	0.6379	0.695491	0.782113	0.882435	0.995002	1.15662	1.45582	2.65051
0.0135519	0.036446	0.0585001	0.0824946	0.106226	0.124023	0.145433	0.170628	0.191402	0.212137	0.239474	0.248047	0.273092	0.311226	0.345106	0.370846	0.402837	0.454584	0.485864	0.534283	0.576441	0.638781	0.696058	0.78229	0.883302	1.00504	1.1586	1.45862	2.66062
0.0136588	0.0365317	0.0587335	0.0827085	0.106492	0.124189	0.14549	0.170867	0.191662	0.212244	0.240216	0.248047	0.273765	0.312292	0.345118	0.371353	0.403005	0.455441	0.488694	0.534826	0.577362	0.639673	0.696058	0.782537	0.884868	1.00599	1.16192	1.46545	2.66216
0.0136626	0.03679	0.0587876	0.082714	0.106537	0.124611	0.145609	0.17097	0.191694	0.212653	0.24035	0.248047	0.274048	0.312682	0.345123	0.37196	0.403371	0.455841	0.489736	0.535374	0.57806	0.640788	0.699663	0.783246	0.886247	1.00986	1.17143	1.47477	2.75141
0.0141424	0.0368221	0.0588581	0.082894	0.106698	0.12501	0.145631	0.17098	0.191705	0.213189	0.240401	0.249205	0.274889	0.313245	0.345388	0.371991	0.404077	0.455996	0.489878	0.536048	0.578971	0.647957	0.701859	0.784356	0.887304	1.0124	1.17211	1.47656	2.77325
0.0141509	0.0368642	0.0593514	0.0829052	0.107172	0.125012	0.145682	0.171121	0.19225	0.213378	0.240415	0.250088	0.27545	0.313471	0.345519	0.372486	0.404463	0.457133	0.491222	0.536171	0.580112	0.648112	0.702347	0.784391	0.888304	1.01282	1.1726	1.48358	3.08423
0.0141937	0.0369115	0.0596279	0.0829415	0.107294	0.125136	0.146859	0.171415	0.192677	0.213533	0.240546	0.252336	0.276745	0.313748	0.34571	0.372493	0.405436	0.458059	0.492188	0.537078	0.581252	0.648643	0.702551	0.787358	0.888311	1.01298	1.17442	1.48576	3.19922
0.0142038	0.0372001	0.0597552	0.08329	0.107373	0.125162	0.147401	0.17169	0.193108	0.214145	0.240558	0.252418	0.277134	0.313823	0.345712	0.372777	0.406158	0.458113	0.492188	0.53868	0.584566	0.6493	0.704631	0.7884	0.88988	1.0149	1.1761	1.48706	3.23414
0.0142416	0.0376529	0.0599198	0.083305	0.107579	0.125175	0.14802	0.172298	0.194259	0.214341	0.240678	0.252898	0.27723	0.314349	0.345787	0.374803	0.406495	0.45821	0.492188	0.539539	0.588803	0.649992	0.705855	0.790452	0.890192	1.01592	1.17768	1.48828	3.44531
0.0143628	0.0376857	0.0601698	0.0834912	0.107666	0.125839	0.148683	0.172575	0.194515	0.215349	0.241117	0.252987	0.278298	0.314492	0.346074	0.376086	0.408642	0.458902	0.492188	0.539559	0.590712	0.650121	0.705997	0.790462	0.890413	1.01647	1.18302	1.48828	4.28042
0.0146265	0.0378096	0.0602489	0.0835433	0.107872	0.126454	0.148956	0.172651	0.194554	0.216331	0.241368	0.253553	0.278524	0.314552	0.346243	0.376189	0.409808	0.459152	0.492188	0.540342	0.593231	0.652207	0.708137	0.792116	0.893837	1.01839	1.1831	1.48828	4.72444
0.0148337	0.0379346	0.0604331	0.0841491	0.108095	0.12653	0.149101	0.172903	0.194665	0.2167	0.241466	0.253757	0.27872	0.315233	0.3465	0.377488	0.410387	0.460004	0.492188	0.540352	0.593441	0.653343	0.71216	0.793431	0.894134	1.01991	1.18562	1.49086	4.78569
0.0148337	0.0379681	0.0605142	0.0842729	0.108568	0.126549	0.149441	0.173018	0.195278	0.216802	0.241501	0.254581	0.280232	0.315286	0.347087	0.377778	0.410743	0.460027	0.492188	0.54539	0.594706	0.653529	0.712267	0.793898	0.894512	1.02128	1.18732	1.49426	4.92876
0.0150198	0.0380412	0.0606831	0.0848879	0.108785	0.127088	0.149569	0.173739	0.19554	0.216938	0.241614	0.25553	0.281406	0.315626	0.347534	0.378261	0.415201	0.460083	0.492188	0.5466	0.596142	0.65451	0.716008	0.795982	0.894624	1.02225	1.18764	1.50699	5.30901
0.0151393	0.0380438	0.060861	0.0851837	0.109131	0.127723	0.149691	0.17374	0.195771	0.216949	0.244532	0.255808	0.281959	0.315831	0.347943	0.379474	0.415932	0.46047	0.492188	0.546686	0.597449	0.657673	0.716176	0.798492	0.89708	1.02309	1.19161	1.50807	5.328
0.0152429	0.0380897	0.0609927	0.0854232	0.109293	0.127832	0.149726	0.173897	0.195877	0.217399	0.244637	0.255909	0.282497	0.316025	0.347964	0.379734	0.420118	0.46051	0.492188	0.547008	0.597684	0.657808	0.716831	0.798971	0.897272	1.02635	1.19899	1.52841	5.34823
0.0152628	0.0383514	0.0610085	0.0854488	0.109379	0.128102	0.149891	0.173951	0.196167	0.217585	0.245356	0.25609	0.282769	0.316232	0.348029	0.38023	0.42023	0.461209	0.492188	0.54936	0.598818	0.658675	0.71748	0.800591	0.897565	1.02732	1.20045	1.53603	7.2833
0.015292	0.0388011	0.0610099	0.0859467	0.109425	0.128184	0.151034	0.174049	0.196616	0.218184	0.245515	0.256222	0.282935	0.316834	0.348029	0.381341	0.42048	0.462421	0.492188	0.550282	0.600452	0.659289	0.719165	0.800905	0.902682	1.0287	1.20275	1.53743	7.3629
0.0155049	0.0390183	0.0610924	0.0862731	0.109439	0.128399	0.151624	0.174495	0.196886	0.218288	0.245926	0.257156	0.283431	0.317075	0.348029	0.381539	0.421846	0.462518	0.492188	0.550282	0.600862	0.660536	0.720836	0.801373	0.90584	1.03323	1.20367	1.54399	8.04911
0.0156613	0.0390817	0.0614131	0.0864494	0.110035	0.12872	0.151972	0.174596	0.196983	0.218353	0.246094	0.257749	0.284644	0.318465	0.348029	0.381801	0.422072	0.463883	0.492493	0.550282	0.601435	0.660729	0.721328	0.80892	0.907315	1.03533	1.20494	1.5479	11.2253
0.0161866	0.0392504	0.0614688	0.0868586	0.110774	0.128815	0.152222	0.174711	0.197806	0.218764	0.246094	0.258073	0.284814	0.319046	0.348029	0.382322	0.422256	0.465145	0.493528	0.550282	0.601813	0.661042	0.724081	0.810133	0.909152	1.03691	1.2076	1.5537	11.4897
0.0163541	0.0393458	0.0618467	0.0871739	0.110819	0.128912	0.152273	0.174715	0.198673	0.218885	0.246094	0.258518	0.285394	0.319293	0.348029	0.382387	0.422731	0.465269	0.493786	0.550282	0.603984	0.661724	0.724393	0.811088	0.909377	1.03909	1.20873	1.55643	12.9961
0.0163694	0.0394027	0.061942	0.0874763	0.111256	0.129103	0.152482	0.175	0.198846	0.218981	0.246094	0.258548	0.285443	0.319318	0.348029	0.382709	0.422778	0.46538	0.4943	0.550282	0.604362	0.662962	0.726398	0.812389	0.909838	1.03986	1.20929	1.56773	14.9075
0.0164515	0.0394881	0.0622479	0.0875018	0.111391	0.129265	0.152608	0.175343	0.19886	0.219236	0.246094	0.259113	0.286416	0.321123	0.348029	0.382756	0.422912	0.467397	0.494399	0.550282	0.60457	0.663083	0.734074	0.813882	0.910864	1.04021	1.20991	1.56937	16.3563
0.016502	0.03977	0.0624667	0.0877656	0.111485	0.129267	0.152719	0.175383	0.199751	0.219316	0.246094	0.259156	0.287917	0.321471	0.348029	0.384017	0.42326	0.46742	0.49549	0.551522	0.606722	0.663308	0.734542	0.814425	0.914057	1.04494	1.21142	1.5708	17.3633
0.0165291	0.0400288	0.0629924	0.0877707	0.111496	0.12945	0.152844	0.175625	0.200217	0.219717	0.246094	0.259403	0.287971	0.321673	0.348029	0.385887	0.42522	0.467632	0.496094	0.551715	0.606989	0.663415	0.735019	0.814843	0.916595	1.0453	1.21531	1.57577	18.63
0.0166154	0.0402158	0.0630308	0.0880322	0.112186	0.129569	0.153019	0.176088	0.200542	0.219885	0.246094	0.259547	0.288659	0.321675	0.348029	0.385904	0.42851	0.469024	0.496094	0.552749	0.607308	0.663726	0.738281	0.815795	0.917505	1.04748	1.21845	1.57577	21.5872
0.016675	0.0403596	0.0632089	0.0880676	0.112211	0.129784	0.153194	0.176948	0.200823	0.22067	0.246094	0.260204	0.290736	0.321772	0.348029	0.385933	0.429999	0.471029	0.496391	0.554366	0.608733	0.664796	0.738393	0.815877	0.922154	1.04771	1.21874	1.57819	23.2338
0.0168425	0.0403714	0.0632093	0.0880879	0.112332	0.129978	0.153332	0.177998	0.201452	0.221088	0.246094	0.26041	0.293054	0.322397	0.34858	0.385972	0.430874	0.471786	0.500853	0.55465	0.608805	0.665308	0.739369	0.816359	0.922873	1.04834	1.22239	1.57908	28.7873
0.016968	0.040535	0.0635792	0.0882322	0.112744	0.130598	0.153979	0.178578	0.201572	0.221222	0.246094	0.261282	0.293147	0.323059	0.349155	0.389371	0.431194	0.473647	0.50149	0.55465	0.611196	0.665614	0.739887	0.816829	0.922957	1.05015	1.2232	1.58336	29.0225
0.0169735	0.040666	0.0635857	0.0882891	0.112823	0.130634	0.154742	0.178755	0.20198	0.221444	0.246094	0.261655	0.293407	0.323334	0.349743	0.390162	0.431518	0.475567	0.501866	0.55465	0.614909	0.666185	0.739962	0.820157	0.923713	1.0525	1.22405	1.59565	32.6206
0.0170361	0.0407358	0.0635861	0.0882967	0.113062	0.130976	0.154872	0.178854	0.202082	0.221731	0.246094	0.261967	0.293536	0.323782	0.350198	0.390199	0.432352	0.476261	0.502418	0.55465	0.61533	0.666802	0.74135	0.820268	0.927562	1.05849	1.23012	1.59819	34.1774
0.0171252	0.0407738	0.0637503	0.0884905	0.113075	0.131257	0.154947	0.179239	0.202189	0.22182	0.246094	0.262515	0.294846	0.324149	0.350791	0.390354	0.433943	0.477079	0.503644	0.55465	0.615656	0.668378	0.745054	0.822356	0.928466	1.05938	1.23047	1.60076	34.4981
0.0171431	0.040926	0.0637829	0.0886919	0.113204	0.131395	0.155077	0.179644	0.20221	0.221862	0.246094	0.262655	0.294974	0.324172	0.350791	0.390383	0.434097	0.477192	0.503705	0.55465	0.620137	0.668477	0.747764	0.822555	0.928493	1.06075	1.23047	1.60241	34.8536
0.0172195	0.0409554	0.063976	0.0889632	0.113471	0.131643	0.156162	0.180703	0.202461	0.223369	0.246094	0.262774	0.295443	0.324342	0.350791	0.391614	0.434337	0.477871	0.503874	0.55465	0.620562	0.668648	0.749548	0.826326	0.929159	1.06087	1.23047	1.60303	35.0097
0.017229	0.0410735	0.0643502	0.089086	0.113677	0.131713	0.157107	0.180745	0.2031	0.224161	0.246094	0.26308	0.295764	0.325077	0.350791	0.391933	0.434861	0.477927	0.507985	0.554957	0.622768	0.669411	0.749791	0.82666	0.932043	1.06443	1.23807	1.60779	36.1613
0.0173514	0.0413073	0.0649567	0.0892355	0.113717	0.132443	0.15711	0.18091	0.203788	0.224206	0.246094	0.26391	0.296127	0.325585	0.350791	0.393502	0.434899	0.478388	0.508835	0.555242	0.623037	0.670782	0.752431	0.827244	0.936435	1.06452	1.23932	1.62032	36.2602
0.0173531	0.0413293	0.0650141	0.0892568	0.113814	0.13245	0.157148	0.181102	0.203945	0.224586	0.246094	0.263926	0.296184	0.326141	0.350791	0.394097	0.435163	0.478628	0.510082	0.556701	0.623733	0.670979	0.753041	0.828053	0.936835	1.06749	1.24023	1.6277	36.58
0.0173779	0.0414938	0.0651281	0.0893023	0.113852	0.132533	0.157671	0.182493	0.204061	0.226554	0.246094	0.264264	0.296195	0.326143	0.350791	0.394545	0.435373	0.478823	0.510591	0.556958	0.623822	0.67316	0.754241	0.829932	0.937097	1.06785	1.24023	1.63304	36.879
0.0174349	0.0415806	0.0652427	0.0893812	0.114455	0.13276	0.157745	0.182807	0.204167	0.226848	0.246094	0.265648	0.296432	0.32621	0.350791	0.395226	0.436063	0.479758	0.511691	0.557317	0.624688	0.673444	0.757217	0.833238	0.9372	1.07042	1.24189	1.64883	42.0244
0.0174939	0.0416073	0.0653714	0.0894049	0.114482	0.132858	0.157778	0.183198	0.204222	0.227081	0.246094	0.265942	0.296629	0.327128	0.350897	0.395896	0.436617	0.480211	0.512352	0.559208	0.624953	0.675046	0.758838	0.833895	0.93965	1.07401	1.24247	1.65085	45.1715
0.0175233	0.0416626	0.065451	0.0894619	0.114609	0.132892	0.15791	0.183528	0.20438	0.227816	0.246171	0.266274	0.297535	0.327266	0.351489	0.396628	0.437704	0.480862	0.513083	0.56047	0.625298	0.675206	0.759782	0.836222	0.942251	1.07404	1.24351	1.65432	45.523
0.0175923	0.0417158	0.0655518	0.0896352	0.115167	0.132984	0.158006	0.183575	0.205479	0.227918	0.247316	0.266782	0.297957	0.32729	0.352738	0.396691	0.437933	0.482633	0.514223	0.563134	0.625384	0.677888	0.761452	0.837249	0.942499	1.0749	1.24363	1.65797	47.5663
0.0176267	0.0417682	0.0657684	0.0896583	0.1152	0.13315	0.158232	0.183587	0.205621	0.228128	0.247444	0.267014	0.298147	0.327979	0.353439	0.397314	0.439491	0.482806	0.514245	0.563227	0.626807	0.678727	0.761962	0.84391	0.94508	1.07589	1.25234	1.66951	47.8079
0.0176987	0.0419516	0.065945	0.0897987	0.115544	0.133691	0.158384	0.183596	0.205752	0.228259	0.247699	0.267205	0.298297	0.32804	0.353498	0.397414	0.439661	0.482836	0.515347	0.56345	0.627113	0.678784	0.76245	0.844688	0.945352	1.077	1.2529	1.67857	49.5584
0.0178842	0.0420808	0.0660936	0.0898539	0.115688	0.134187	0.158454	0.184393	0.205887	0.228671	0.248047	0.267449	0.298317	0.328115	0.354247	0.397556	0.440741	0.483894	0.515718	0.565052	0.630023	0.679113	0.762743	0.846373	0.948302	1.07702	1.2546	1.6888	51.6708
0.0180749	0.042111	0.0664408	0.0900179	0.11569	0.134285	0.158614	0.184728	0.206264	0.228754	0.248047	0.267814	0.298506	0.328912	0.354552	0.397948	0.441298	0.484093	0.517156	0.567263	0.630098	0.681319	0.76296	0.846808	0.951955	1.07827	1.26173	1.69048	51.8845
0.0180984	0.0422053	0.0664626	0.0900818	0.115866	0.134291	0.159251	0.18478	0.206468	0.228866	0.248047	0.267997	0.299331	0.329035	0.354579	0.39873	0.441316	0.484331	0.51751	0.567437	0.630721	0.68173	0.769539	0.847122	0.952725	1.07846	1.26318	1.6972	52.6381
0.0181685	0.0422436	0.0666485	0.0900818	0.116068	0.134465	0.159426	0.18479	0.206667	0.229099	0.248047	0.268244	0.299452	0.329128	0.355318	0.399508	0.442159	0.487438	0.51935	0.568406	0.630992	0.685011	0.770081	0.848005	0.953924	1.0814	1.26342	1.69735	53.5138
0.0183542	0.0422841	0.0667483	0.0902528	0.116656	0.134602	0.159963	0.184939	0.206879	0.229468	0.248047	0.269556	0.299519	0.329688	0.355921	0.399884	0.442426	0.487695	0.520139	0.568642	0.631789	0.68569	0.772081	0.848115	0.956984	1.08806	1.26427	1.70717	54.3537
0.0183798	0.0423081	0.0669488	0.0905014	0.116839	0.134971	0.160542	0.185057	0.206994	0.229495	0.248047	0.269751	0.29999	0.329862	0.355925	0.400647	0.442693	0.48907	0.52083	0.568822	0.631944	0.685806	0.778217	0.848305	0.95743	1.08846	1.2648	1.71157	59.8565
0.0184345	0.0423519	0.0670356	0.0906643	0.116921	0.135402	0.160666	0.185175	0.207586	0.22956	0.248047	0.270602	0.301446	0.329991	0.357809	0.40115	0.443607	0.489307	0.521748	0.57081	0.632053	0.687595	0.778217	0.84864	0.96046	1.09027	1.26715	1.71605	60.1451
0.0184365	0.0423761	0.0673336	0.0909377	0.116986	0.135602	0.16096	0.18523	0.207906	0.229648	0.248047	0.270665	0.301696	0.330054	0.358067	0.401238	0.444279	0.490962	0.52428	0.57159	0.632135	0.689623	0.778217	0.849071	0.960822	1.09123	1.26746	1.72948	60.646
0.0185475	0.0423982	0.0676392	0.0909923	0.117484	0.135834	0.161156	0.185348	0.208974	0.229868	0.248047	0.270728	0.302374	0.330415	0.358151	0.403438	0.447306	0.491476	0.52547	0.575091	0.635066	0.691743	0.778217	0.85499	0.961167	1.09249	1.27403	1.73013	61.6938
0.0185828	0.0424797	0.0677764	0.0910105	0.117501	0.135871	0.161311	0.185497	0.209048	0.230382	0.248047	0.271376	0.302501	0.331282	0.358382	0.403589	0.44745	0.492188	0.525651	0.575585	0.635302	0.692163	0.778729	0.855675	0.962147	1.09518	1.27661	1.73017	66.0528
0.0186679	0.0424882	0.0677881	0.0914268	0.117734	0.135959	0.161438	0.185733	0.210058	0.2305	0.248047	0.271457	0.302993	0.332894	0.358865	0.404437	0.448119	0.492188	0.526258	0.57758	0.637519	0.693535	0.778941	0.855815	0.964024	1.09545	1.27954	1.74015	66.5585
0.0188519	0.0425755	0.0678043	0.0914642	0.117916	0.13613	0.161579	0.186105	0.210321	0.23058	0.248047	0.271942	0.303319	0.333693	0.361247	0.405016	0.448503	0.492188	0.528752	0.578467	0.638666	0.694249	0.779679	0.855944	0.964743	1.10015	1.28068	1.75299	67.7901
0.0189412	0.0426282	0.0679437	0.0920853	0.118169	0.136474	0.161645	0.186944	0.210447	0.230958	0.248047	0.272094	0.303381	0.333739	0.361864	0.405223	0.448993	0.492188	0.528783	0.578529	0.638928	0.699663	0.782476	0.85976	0.966982	1.10023	1.28371	1.75607	67.8429
0.0189492	0.0427637	0.0680165	0.0922277	0.118187	0.136534	0.161953	0.187249	0.210668	0.231064	0.248047	0.272162	0.303735	0.334202	0.362766	0.406623	0.449432	0.492188	0.529083	0.578814	0.639034	0.701125	0.782865	0.860164	0.968162	1.10056	1.28904	1.76011	69.3801
0.0189691	0.0429661	0.0680556	0.0924162	0.118202	0.136812	0.162082	0.187813	0.210726	0.232565	0.248234	0.272462	0.303967	0.334385	0.363186	0.406914	0.449584	0.492188	0.53112	0.580161	0.639374	0.701583	0.783502	0.860404	0.970436	1.10056	1.29486	1.76119	69.7306
0.0189847	0.0430347	0.068161	0.0926176	0.118932	0.13688	0.162107	0.188158	0.211218	0.232662	0.248651	0.272698	0.304315	0.335604	0.363431	0.40763	0.451174	0.492188	0.531429	0.580604	0.641259	0.702033	0.784393	0.862353	0.97055	1.10386	1.29599	1.77119	82.3991
0.0189847	0.0433832	0.0683334	0.0926491	0.1193	0.137031	0.162135	0.188838	0.211578	0.23267	0.248825	0.274993	0.304738	0.336268	0.363491	0.408598	0.451605	0.492188	0.532367	0.581046	0.641511	0.70302	0.785198	0.862733	0.970691	1.10621	1.30061	1.78617	85.7155
0.0189879	0.0435036	0.0684049	0.0927197	0.11935	0.137463	0.162732	0.189003	0.211591	0.234019	0.250031	0.275703	0.304819	0.336408	0.363547	0.409096	0.452125	0.492188	0.534175	0.582821	0.641681	0.7051	0.786041	0.866053	0.972714	1.11013	1.30159	1.79159	102.274
0.0190822	0.0436641	0.0685335	0.0928437	0.119753	0.138225	0.163052	0.18914	0.211655	0.234046	0.250366	0.275747	0.305352	0.337211	0.36387	0.409681	0.45214	0.492188	0.534769	0.583313	0.642067	0.706777	0.787047	0.866649	0.975178	1.11035	1.30725	1.79159	104.943
0.0191234	0.0437535	0.0685759	0.0931917	0.119936	0.139045	0.163313	0.189221	0.212441	0.234226	0.250558	0.275921	0.306509	0.337422	0.364072	0.410517	0.4524	0.49227	0.535301	0.584706	0.642128	0.707536	0.789748	0.867014	0.975324	1.11067	1.31294	1.79272
0.0191483	0.0443068	0.0686255	0.0932776	0.119995	0.139047	0.163595	0.189522	0.212768	0.235153	0.250637	0.276237	0.307567	0.337428	0.364473	0.410641	0.453282	0.492359	0.535471	0.585391	0.642376	0.711463	0.790899	0.867717	0.977065	1.11431	1.31932	1.80676
0.0191543	0.0444288	0.0687324	0.0932907	0.120032	0.139091	0.163702	0.189857	0.212801	0.235426	0.250781	0.276683	0.307603	0.337533	0.364692	0.41097	0.453963	0.493528	0.535944	0.586741	0.642481	0.712032	0.793267	0.869871	0.978228	1.11707	1.31984	1.81189
0.0193125	0.0446843	0.0687437	0.0933582	0.120703	0.139118	0.163761	0.189879	0.2141	0.235527	0.250886	0.277135	0.309178	0.337563	0.365387	0.411235	0.45431	0.494013	0.536142	0.587218	0.642908	0.713051	0.794742	0.869918	0.978581	1.11743	1.32035	1.82192
0.0193152	0.0449141	0.0689354	0.0935824	0.120755	0.139781	0.163986	0.190059	0.214967	0.235602	0.251016	0.277499	0.309371	0.33892	0.365389	0.411604	0.455149	0.494421	0.538392	0.589094	0.644196	0.713197	0.796025	0.871235	0.980436	1.11934	1.32456	1.82294
0.0193156	0.0453434	0.0690802	0.093703	0.121418	0.140045	0.164116	0.190154	0.21497	0.235655	0.251046	0.277607	0.30948	0.338923	0.365705	0.411852	0.455584	0.496094	0.539714	0.590343	0.645889	0.713284	0.796831	0.872546	0.981342	1.12115	1.32526	1.82457
0.0193501	0.0454874	0.0690964	0.0937728	0.121507	0.140716	0.164274	0.19037	0.215255	0.235773	0.251145	0.278246	0.309669	0.33949	0.366074	0.41243	0.455602	0.496094	0.5399	0.590533	0.646842	0.713878	0.798268	0.874063	0.985267	1.12342	1.32526	1.827
0.0193845	0.0454989	0.0691157	0.0940107	0.121563	0.140908	0.16463	0.190371	0.215864	0.235913	0.251148	0.278969	0.30986	0.340461	0.367021	0.412676	0.455729	0.496094	0.54123	0.592069	0.648278	0.714033	0.798373	0.87742	0.986111	1.12449	1.32526	1.83207
0.0194904	0.0455031	0.0691612	0.0941128	0.121825	0.140914	0.164636	0.190592	0.216601	0.237253	0.251328	0.279932	0.310221	0.340469	0.367296	0.414126	0.457047	0.49697	0.541492	0.593622	0.649039	0.716026	0.798431	0.877673	0.995635	1.12687	1.32526	1.84084
0.0195021	0.0455149	0.069187	0.0942035	0.12215	0.140997	0.164654	0.190737	0.216634	0.238812	0.252701	0.281032	0.31042	0.3405	0.368338	0.414934	0.457596	0.497262	0.543048	0.593727	0.650455	0.71677	0.798965	0.877734	0.996742	1.12699	1.33234	1.86346
0.0195919	0.0455273	0.069314	0.0942055	0.122368	0.141457	0.164884	0.191041	0.216822	0.240834	0.252979	0.281132	0.310584	0.340638	0.368565	0.415205	0.457717	0.497271	0.543334	0.595164	0.65181	0.716831	0.801373	0.878555	0.999586	1.12884	1.33242	1.87419
0.0196098	0.0456424	0.0693453	0.0942665	0.122408	0.142224	0.165008	0.191141	0.216991	0.240839	0.253161	0.282293	0.310764	0.3407	0.369207	0.415259	0.45794	0.497479	0.543357	0.595916	0.651902	0.71748	0.802752	0.878556	1.00094	1.13206	1.33334	1.87419
0.0196297	0.0457835	0.0693733	0.0945104	0.122432	0.142572	0.165023	0.19166	0.217246	0.241075	0.253443	0.282686	0.311523	0.340769	0.369386	0.415922	0.45847	0.497613	0.543874	0.595986	0.653334	0.719463	0.802827	0.879564	1.00148	1.13275	1.33345	1.8789
0.0196706	0.0457847	0.0696938	0.0946876	0.122529	0.142594	0.165057	0.191663	0.21733	0.241955	0.254122	0.282986	0.312064	0.341911	0.370273	0.416558	0.458597	0.499469	0.545589	0.596218	0.653359	0.722585	0.802829	0.881138	1.00174	1.13336	1.33548	1.88377
0.0198048	0.0458531	0.0697359	0.0949509	0.123235	0.142981	0.165391	0.191838	0.217485	0.24282	0.254588	0.283285	0.312791	0.3426	0.372382	0.416983	0.459313	0.501151	0.545748	0.596686	0.658271	0.722878	0.80301	0.882435	1.00315	1.13394	1.34314	1.90137
0.0198567	0.0458689	0.0697384	0.0951298	0.123507	0.143587	0.166082	0.192398	0.217518	0.242822	0.254818	0.283376	0.313777	0.342718	0.372895	0.417912	0.460047	0.501564	0.545777	0.596717	0.658936	0.726028	0.803527	0.884429	1.00455	1.13469	1.3475	1.90195
0.0198864	0.0460513	0.0697492	0.0953334	0.123626	0.143785	0.166135	0.19327	0.21776	0.243067	0.255338	0.284881	0.313785	0.342745	0.373324	0.418002	0.460083	0.502418	0.545916	0.59839	0.659411	0.727152	0.804457	0.88482	1.00578	1.13673	1.35009	1.90756
0.019948	0.0462265	0.0699159	0.0953845	0.124004	0.143821	0.166708	0.193273	0.21846	0.243251	0.256164	0.286826	0.314063	0.342856	0.37448	0.418158	0.460846	0.504333	0.546221	0.598839	0.661105	0.728997	0.804727	0.885058	1.00829	1.14518	1.35039	1.90873
0.0199567	0.0462442	0.0699345	0.0955061	0.124116	0.144127	0.167164	0.193415	0.219127	0.244369	0.25619	0.287099	0.31476	0.342923	0.374893	0.418572	0.461083	0.504478	0.5466	0.601212	0.661551	0.730705	0.804902	0.885285	1.00843	1.14932	1.3522	1.91177
0.0199715	0.0462908	0.0700422	0.095643	0.124189	0.144234	0.167421	0.193437	0.219504	0.244642	0.256894	0.287542	0.314862	0.34304	0.375752	0.419786	0.461176	0.504538	0.546936	0.601558	0.662409	0.730972	0.804917	0.88633	1.01074	1.15083	1.35593	1.91348
0.0201977	0.0463227	0.0700449	0.0959769	0.12476	0.144493	0.167663	0.193608	0.219774	0.244685	0.257029	0.287964	0.315037	0.343137	0.376136	0.420745	0.461403	0.505327	0.547001	0.60472	0.666017	0.731467	0.806286	0.886615	1.01261	1.15176	1.36182	1.92205
0.0202725	0.04633	0.070154	0.0960854	0.124976	0.144749	0.167713	0.19414	0.220731	0.245671	0.257273	0.287971	0.31522	0.343372	0.376764	0.421146	0.46226	0.505756	0.550282	0.607274	0.666018	0.731936	0.806518	0.887304	1.0138	1.15223	1.36232	1.92797
0.0202789	0.0463519	0.0702575	0.0961283	0.125209	0.145098	0.168044	0.194414	0.220994	0.246094	0.257454	0.288096	0.316161	0.343705	0.378098	0.42121	0.462281	0.506363	0.550282	0.607742	0.6664	0.732839	0.807883	0.887304	1.01467	1.15451	1.36337	1.94959
0.0203891	0.0466826	0.0703214	0.0961877	0.125368	0.145125	0.168144	0.194554	0.221113	0.246094	0.257816	0.288371	0.316652	0.343969	0.37814	0.4214	0.462457	0.506738	0.550282	0.608805	0.667888	0.733814	0.809548	0.887304	1.01467	1.1564	1.36827	1.95303
0.0204706	0.0466933	0.0704306	0.096833	0.125376	0.14521	0.168149	0.195967	0.221407	0.246094	0.260417	0.288412	0.316796	0.345632	0.378349	0.42202	0.463836	0.506884	0.550282	0.609251	0.667991	0.734204	0.809879	0.887327	1.01467	1.15749	1.37015	1.95911
0.0204913	0.0470524	0.0704925	0.0969217	0.125426	0.145247	0.168488	0.196189	0.221489	0.246094	0.260763	0.28855	0.317468	0.345687	0.378359	0.423051	0.46416	0.507101	0.550282	0.609452	0.6683	0.737305	0.810377	0.887579	1.01507	1.1578	1.37082	1.96391
0.0205031	0.0471295	0.0705126	0.0969629	0.125812	0.145262	0.168553	0.196226	0.221534	0.246094	0.261667	0.288653	0.317485	0.346256	0.37881	0.424053	0.464271	0.507833	0.550282	0.609643	0.669022	0.738281	0.810462	0.890205	1.01966	1.15792	1.37409	1.96572
0.020568	0.0471648	0.0705492	0.0970219	0.125931	0.145838	0.168807	0.196543	0.221616	0.246094	0.262187	0.288768	0.31749	0.3464	0.378879	0.424061	0.464476	0.508803	0.550747	0.609702	0.671724	0.738281	0.810961	0.890907	1.02031	1.16198	1.37823	1.96875
0.0206865	0.0472628	0.070621	0.0971101	0.126077	0.146344	0.168893	0.196586	0.221761	0.246094	0.262255	0.289338	0.317999	0.346746	0.379952	0.424792	0.464672	0.509337	0.551048	0.610638	0.672056	0.738281	0.814034	0.892656	1.0226	1.16352	1.38533	1.96875
0.0207164	0.0473788	0.0706573	0.0974137	0.126151	0.147135	0.168894	0.196814	0.221793	0.246094	0.262393	0.289559	0.318783	0.346906	0.38136	0.425405	0.464805	0.509417	0.551099	0.611237	0.672775	0.738281	0.814425	0.893875	1.02323	1.16453	1.39063	1.96882
0.0207702	0.047519	0.0707649	0.097514	0.126179	0.147336	0.168945	0.196886	0.221932	0.246094	0.262591	0.289948	0.319825	0.348029	0.38171	0.426326	0.465102	0.510947	0.551639	0.611924	0.673237	0.738281	0.814676	0.895022	1.02615	1.16461	1.39212	1.98314
0.0208933	0.0475493	0.0708017	0.0977359	0.126579	0.14859	0.169084	0.196919	0.222723	0.246094	0.264844	0.290306	0.320046	0.348029	0.38181	0.426382	0.465235	0.511019	0.551824	0.612087	0.674422	0.738281	0.819623	0.895096	1.02635	1.16501	1.39282	1.98407
0.0210392	0.0477176	0.0712458	0.097751	0.126767	0.148799	0.169317	0.197058	0.222853	0.246094	0.26519	0.29099	0.320086	0.348029	0.382322	0.426442	0.467965	0.511286	0.552309	0.61257	0.677074	0.741539	0.820742	0.895552	1.02719	1.1654	1.39507	1.993
0.0211286	0.0478746	0.0716895	0.0978278	0.127161	0.148916	0.169366	0.197097	0.223421	0.246094	0.265475	0.292134	0.321044	0.348029	0.382829	0.426851	0.468483	0.511409	0.55348	0.61577	0.678156	0.744048	0.821003	0.895964	1.0299	1.16799	1.39959	1.99343
0.0211698	0.0480471	0.0718	0.0982042	0.127206	0.149042	0.169431	0.197531	0.223583	0.246094	0.265588	0.29237	0.321334	0.348029	0.383085	0.426924	0.46875	0.511761	0.554149	0.616935	0.678727	0.745119	0.821452	0.896883	1.03028	1.16829	1.4057	2.01106
0.0212374	0.0481165	0.0718595	0.0983636	0.127252	0.149236	0.170012	0.197592	0.223798	0.246094	0.266572	0.292901	0.321717	0.348029	0.383264	0.426981	0.469093	0.511815	0.55465	0.617443	0.68005	0.748833	0.822626	0.89708	1.03103	1.16829	1.40695	2.01728
0.0212754	0.0481478	0.0720439	0.0984481	0.127449	0.149517	0.170041	0.197747	0.223881	0.246094	0.266913	0.293046	0.321929	0.348029	0.383293	0.427887	0.470324	0.512016	0.55465	0.617944	0.680484	0.749105	0.823548	0.897123	1.03119	1.16844	1.40801	2.02506
0.0213368	0.0482113	0.0720753	0.0984678	0.127567	0.149638	0.170121	0.197819	0.223904	0.246094	0.26702	0.293337	0.322168	0.348029	0.38379	0.428433	0.473871	0.512934	0.55465	0.618595	0.682838	0.749831	0.823635	0.898924	1.03176	1.17235	1.4137	2.03955
0.0214793	0.0482797	0.0721291	0.0985796	0.127782	0.149665	0.17017	0.197904	0.223968	0.246094	0.268382	0.293618	0.322532	0.348029	0.383893	0.428628	0.473899	0.513055	0.55465	0.619916	0.684471	0.750822	0.824668	0.899761	1.03359	1.17239	1.41839	2.06789
0.0215093	0.0483975	0.0722883	0.0988967	0.127849	0.149679	0.170384	0.198109	0.224015	0.246094	0.268538	0.293841	0.322979	0.348029	0.384666	0.429478	0.474162	0.513083	0.55465	0.620625	0.684596	0.751577	0.827188	0.900345	1.03456	1.17325	1.42016	2.0802
0.0217013	0.0483993	0.0723517	0.0989426	0.128002	0.14975	0.170536	0.198304	0.22408	0.246094	0.269152	0.295327	0.32305	0.348029	0.384825	0.429953	0.476372	0.513331	0.55465	0.621782	0.684947	0.752325	0.827948	0.901035	1.03533	1.17584	1.42082	2.11094
0.0217946	0.0486041	0.0723921	0.0991023	0.128028	0.149755	0.170614	0.198637	0.224089	0.246094	0.269733	0.295682	0.323124	0.348029	0.385912	0.431217	0.476803	0.514662	0.555431	0.621882	0.685283	0.752796	0.828389	0.902622	1.0365	1.17614	1.42465	2.11698
0.0219193	0.0487381	0.0730689	0.0994709	0.128079	0.149871	0.170681	0.198643	0.224369	0.246094	0.26984	0.295871	0.323211	0.348029	0.386019	0.43151	0.477789	0.515712	0.556725	0.622452	0.687464	0.753117	0.828436	0.902652	1.03905	1.17888	1.42988	2.11931
0.0219676	0.0487545	0.0732146	0.0995781	0.128125	0.149874	0.170834	0.198689	0.224462	0.246094	0.269941	0.296414	0.323364	0.348029	0.386082	0.431772	0.478085	0.516115	0.558005	0.623148	0.687871	0.754053	0.828815	0.902833	1.04107	1.18034	1.43005	2.14304
0.0219924	0.048893	0.0734255	0.0996789	0.128278	0.150007	0.171211	0.199254	0.224586	0.246094	0.270638	0.296463	0.323417	0.348054	0.388053	0.431819	0.479382	0.51765	0.558059	0.623197	0.688596	0.754958	0.829054	0.904562	1.04315	1.18036	1.43496	2.15474
0.022047	0.0488944	0.0736952	0.0997519	0.128461	0.150017	0.171407	0.199643	0.22492	0.246094	0.27074	0.296525	0.324172	0.348573	0.389111	0.432908	0.480587	0.517818	0.558178	0.623742	0.689944	0.755158	0.829161	0.904783	1.04409	1.18165	1.43496	2.15692
0.0220731	0.0490963	0.0737465	0.0997711	0.12847	0.150083	0.171583	0.199652	0.225271	0.246094	0.271167	0.298042	0.324503	0.349117	0.389153	0.433237	0.482456	0.518287	0.559286	0.624463	0.690713	0.757973	0.830294	0.90549	1.04521	1.1831	1.43496	2.17403
0.0221152	0.0491834	0.0737797	0.0997759	0.128535	0.150133	0.171947	0.200353	0.225743	0.246094	0.27263	0.298143	0.324812	0.349368	0.389455	0.433312	0.482552	0.518661	0.560155	0.624748	0.691084	0.757996	0.830721	0.905899	1.04568	1.18389	1.43496	2.20179
0.0221211	0.0493015	0.0737979	0.0999705	0.128616	0.150361	0.172028	0.200432	0.226337	0.246094	0.273804	0.29855	0.325137	0.349852	0.389584	0.433579	0.483152	0.518814	0.56052	0.625846	0.691221	0.758249	0.832795	0.906986	1.04595	1.18662	1.43496	2.20381
0.0222034	0.0493392	0.0738538	0.100273	0.128961	0.150745	0.172035	0.200507	0.226355	0.246094	0.273806	0.299287	0.325315	0.349969	0.390036	0.433831	0.483606	0.518919	0.560576	0.626176	0.691576	0.760808	0.833307	0.907315	1.04604	1.1868	1.43599	2.21484
0.0222376	0.049405	0.0739266	0.10042	0.129153	0.151452	0.172084	0.20103	0.227556	0.246094	0.274373	0.299305	0.325444	0.350402	0.39024	0.434065	0.484314	0.519331	0.561053	0.627446	0.69267	0.761195	0.833443	0.907586	1.04805	1.18764	1.44111	2.21484
0.0222483	0.0494229	0.0739426	0.100585	0.12921	0.151728	0.172511	0.201126	0.227782	0.246474	0.274944	0.299373	0.325989	0.350624	0.391594	0.434337	0.486278	0.520311	0.561758	0.627501	0.692987	0.762034	0.835821	0.909775	1.04838	1.18838	1.44196	2.22493
0.0222987	0.0494756	0.073958	0.100633	0.129491	0.151794	0.173101	0.201617	0.227832	0.247189	0.275842	0.299641	0.326395	0.350791	0.391711	0.435163	0.486775	0.520832	0.561881	0.630295	0.693082	0.762338	0.837663	0.909907	1.04898	1.18953	1.44216	2.24276
0.0223054	0.0495254	0.0740743	0.101034	0.12955	0.152231	0.173229	0.201618	0.227949	0.247536	0.277088	0.300402	0.326704	0.350791	0.391959	0.435298	0.486796	0.520917	0.563092	0.630627	0.693406	0.76326	0.837798	0.910291	1.05014	1.18967	1.44552	2.26887
0.0223945	0.0495877	0.0742963	0.101198	0.129656	0.152906	0.173253	0.202195	0.228175	0.247727	0.27779	0.300694	0.326771	0.350791	0.392069	0.435429	0.487207	0.521244	0.563648	0.63121	0.693819	0.764193	0.838962	0.911679	1.05214	1.19154	1.44762	2.30704
0.0223966	0.0496018	0.0742993	0.101198	0.12967	0.152981	0.173853	0.20243	0.228753	0.248047	0.278327	0.30141	0.326965	0.350791	0.393803	0.435605	0.487478	0.52242	0.563916	0.631453	0.694284	0.765134	0.839078	0.916031	1.05559	1.1919	1.44819	2.32164
0.0224721	0.0497109	0.0746368	0.101591	0.129928	0.153716	0.174214	0.20286	0.228812	0.248047	0.27872	0.301625	0.32729	0.350791	0.39385	0.437079	0.48907	0.523494	0.564357	0.632444	0.695519	0.766496	0.840267	0.918969	1.05571	1.19453	1.44944	2.32986
0.0225061	0.04973	0.074936	0.101833	0.130176	0.154173	0.174312	0.202999	0.22898	0.248047	0.278898	0.301688	0.327442	0.35106	0.393916	0.437704	0.489587	0.523993	0.56461	0.632709	0.696058	0.768437	0.841115	0.919116	1.05577	1.19594	1.45036	2.33465
0.0225162	0.0499081	0.0749718	0.101981	0.130437	0.154229	0.174321	0.203332	0.22911	0.248047	0.279462	0.301804	0.328106	0.351395	0.39397	0.437891	0.489799	0.524256	0.564653	0.633544	0.696058	0.769006	0.841429	0.919526	1.05619	1.19683	1.4748	2.36782
0.0226654	0.0499828	0.075022	0.102032	0.130456	0.154419	0.174524	0.203535	0.229334	0.248047	0.279582	0.301844	0.328905	0.352307	0.39423	0.439414	0.489831	0.524696	0.564878	0.634566	0.696058	0.769417	0.842265	0.920361	1.05629	1.19992	1.47656	2.38211
0.0226967	0.0501327	0.0752513	0.102096	0.130545	0.154557	0.175018	0.204053	0.229589	0.248047	0.279938	0.301881	0.329537	0.352692	0.394451	0.440313	0.489836	0.524925	0.566245	0.635165	0.696137	0.771602	0.842655	0.921509	1.05743	1.20006	1.48828	2.42374
0.022757	0.0501586	0.0753393	0.102596	0.130841	0.154569	0.175021	0.204191	0.229764	0.248047	0.280986	0.301911	0.329715	0.352744	0.394946	0.440656	0.490462	0.525163	0.566462	0.635342	0.697595	0.772306	0.842813	0.92297	1.05798	1.20021	1.48828	2.46579
0.0227677	0.0501725	0.0753799	0.102631	0.130894	0.15482	0.175128	0.204277	0.229856	0.248047	0.281175	0.30268	0.330535	0.352978	0.395423	0.440855	0.490719	0.52612	0.567904	0.63588	0.6996	0.772484	0.844688	0.926625	1.05806	1.20032	1.48889	2.48047
0.0227959	0.0502575	0.075382	0.10291	0.130912	0.155094	0.175323	0.204735	0.229957	0.248047	0.281377	0.303183	0.330765	0.353439	0.396344	0.441091	0.490991	0.526163	0.568974	0.636342	0.699866	0.773244	0.845645	0.92731	1.0591	1.20367	1.49342	2.48826
0.0228168	0.0502899	0.0754286	0.102916	0.130972	0.155233	0.17548	0.205634	0.230716	0.248195	0.282181	0.303676	0.330802	0.353734	0.396504	0.441246	0.491126	0.527097	0.570945	0.636882	0.700496	0.773483	0.845932	0.933634	1.05938	1.20996	1.49912	2.49652
0.0228367	0.050317	0.0755042	0.103119	0.131076	0.155274	0.175549	0.206033	0.230847	0.248987	0.282224	0.304064	0.331586	0.355075	0.396847	0.442032	0.492188	0.527229	0.571061	0.637021	0.701271	0.774561	0.846552	0.939039	1.06042	1.21236	1.5003	2.56929
0.022892	0.0503989	0.0757117	0.103232	0.131113	0.155277	0.175749	0.206142	0.231079	0.249048	0.28225	0.304967	0.332119	0.355169	0.397767	0.442717	0.492188	0.527453	0.571651	0.637422	0.701583	0.774786	0.847606	0.939567	1.06065	1.21669	1.50401	2.56929
0.0229478	0.0505657	0.0758138	0.103659	0.13157	0.15536	0.175791	0.206567	0.231602	0.249252	0.282337	0.305694	0.332757	0.355223	0.398521	0.442956	0.492188	0.527523	0.571665	0.6384	0.702926	0.775219	0.848074	0.939923	1.06517	1.21811	1.50663	2.58969
0.0229574	0.0506231	0.0758969	0.103679	0.13179	0.155762	0.175823	0.206749	0.231679	0.24977	0.282711	0.306185	0.332958	0.355977	0.398991	0.44324	0.492188	0.527726	0.572505	0.639324	0.703696	0.776775	0.848577	0.943264	1.06642	1.21819	1.50795	2.61838
0.022961	0.050665	0.075932	0.10374	0.131985	0.155924	0.176346	0.206902	0.231797	0.252204	0.28306	0.306255	0.333283	0.356203	0.399335	0.443745	0.492188	0.528279	0.57292	0.640135	0.70478	0.776971	0.849478	0.9447	1.06653	1.2195	1.51054	2.65269
0.0230246	0.0507675	0.0759793	0.103835	0.132004	0.156379	0.176462	0.207056	0.23188	0.252383	0.283361	0.306376	0.333639	0.356496	0.399785	0.444824	0.492188	0.528941	0.573997	0.640249	0.70503	0.778217	0.851851	0.944963	1.06694	1.22226	1.51092	2.70703
0.0230697	0.0508577	0.0763021	0.104001	0.132146	0.156519	0.176667	0.207195	0.232043	0.252453	0.283583	0.307103	0.334663	0.356938	0.399884	0.446546	0.492188	0.528984	0.574873	0.640528	0.705619	0.778217	0.852356	0.945064	1.06721	1.22463	1.51369	2.71819
0.0230988	0.0509826	0.0763716	0.104424	0.132439	0.156643	0.176965	0.207252	0.232067	0.252533	0.283631	0.30728	0.334694	0.35798	0.400707	0.446677	0.492188	0.53063	0.575001	0.643385	0.706072	0.778217	0.85274	0.946183	1.06845	1.22563	1.51419	2.77325
0.0231178	0.0510978	0.0764149	0.104475	0.132542	0.156953	0.178358	0.207498	0.232142	0.252795	0.283671	0.308191	0.334897	0.358172	0.40078	0.447186	0.492188	0.53276	0.57555	0.643641	0.706385	0.778217	0.853128	0.948006	1.07436	1.22879	1.51677	2.95232
0.0232145	0.0514059	0.0767162	0.104479	0.132758	0.157244	0.178372	0.207704	0.232171	0.253107	0.284196	0.308279	0.335342	0.359385	0.400954	0.447235	0.492188	0.532939	0.575706	0.643697	0.70658	0.778217	0.853508	0.949639	1.07438	1.22999	1.51682	2.95312
0.0232311	0.0515284	0.076954	0.104722	0.132823	0.157508	0.178491	0.207762	0.23234	0.253434	0.284355	0.308299	0.335454	0.35988	0.400958	0.447308	0.492188	0.534634	0.576315	0.643782	0.706777	0.778217	0.854392	0.950609	1.07525	1.23047	1.51977	2.96336
0.023252	0.0515837	0.077175	0.105105	0.132861	0.157633	0.178666	0.207896	0.232354	0.254985	0.285096	0.309488	0.336338	0.360178	0.401534	0.44858	0.492692	0.535577	0.578387	0.644347	0.707152	0.778674	0.854487	0.954005	1.07605	1.23047	1.52048	3.09569
0.0232822	0.0516035	0.0772926	0.105263	0.132936	0.1577	0.17872	0.207923	0.232507	0.25516	0.285365	0.310193	0.336941	0.360515	0.401662	0.448948	0.492728	0.540555	0.57933	0.644972	0.708216	0.779104	0.854687	0.954255	1.0785	1.23047	1.5229	3.14881
0.0232897	0.0516686	0.0773941	0.105311	0.133138	0.157741	0.17873	0.208103	0.23257	0.255366	0.285432	0.310543	0.337003	0.361009	0.401676	0.449784	0.493073	0.540914	0.580221	0.645355	0.710419	0.779947	0.855051	0.95562	1.07874	1.23047	1.54483	3.52541
0.023316	0.0517084	0.0775007	0.105379	0.133228	0.157833	0.178977	0.208383	0.232849	0.255375	0.285617	0.310861	0.337246	0.361324	0.40192	0.449788	0.49308	0.541302	0.580394	0.645487	0.710806	0.780316	0.855913	0.955838	1.08154	1.23243	1.54931	3.86435
0.0233533	0.0517782	0.0775095	0.105578	0.133297	0.157936	0.179025	0.208413	0.23342	0.255517	0.285618	0.310987	0.338345	0.361385	0.402097	0.449864	0.493223	0.541345	0.580422	0.645549	0.712032	0.780621	0.857286	0.955845	1.08174	1.23268	1.55132	4.22858
0.0233595	0.0520049	0.0778372	0.105853	0.133345	0.15805	0.179201	0.208487	0.233697	0.255729	0.285685	0.3112	0.338952	0.361465	0.402207	0.451414	0.493631	0.543217	0.581839	0.648031	0.712119	0.781082	0.857534	0.956704	1.08224	1.23638	1.55643	4.38725
0.0234655	0.0521471	0.0778442	0.106007	0.133357	0.158295	0.179376	0.208541	0.233916	0.25579	0.286303	0.311779	0.339432	0.361486	0.402412	0.45207	0.494382	0.543385	0.582828	0.648168	0.712359	0.784304	0.858453	0.957217	1.08448	1.23673	1.5622	4.62051
0.0234755	0.0521812	0.0780207	0.106042	0.133694	0.158375	0.179533	0.208653	0.234495	0.255844	0.286321	0.312292	0.33977	0.361516	0.402613	0.453125	0.495889	0.54445	0.58375	0.649586	0.712396	0.784393	0.858673	0.95847	1.08607	1.23901	1.57319	4.95109
0.0236077	0.0523784	0.0780235	0.106231	0.133881	0.158437	0.179729	0.208974	0.234738	0.256221	0.286501	0.312822	0.339824	0.361538	0.402721	0.453526	0.496094	0.54513	0.584324	0.65003	0.714462	0.784393	0.859021	0.959302	1.08719	1.24023	1.57644	4.96441
0.0237745	0.0524414	0.078044	0.106387	0.134024	0.158616	0.18031	0.209152	0.2355	0.256245	0.28689	0.313478	0.339904	0.361636	0.40285	0.453964	0.496094	0.54573	0.586044	0.650191	0.714964	0.784393	0.860164	0.960701	1.09019	1.24756	1.58298	5.07934
0.0238457	0.0527297	0.078051	0.106412	0.134183	0.158715	0.180359	0.209894	0.235701	0.256326	0.2876	0.313553	0.340031	0.361725	0.402878	0.45464	0.496094	0.546057	0.587075	0.650523	0.716401	0.785053	0.860733	0.961336	1.09022	1.24801	1.58361	5.16162
0.0239537	0.0528033	0.0780879	0.106454	0.134438	0.158849	0.180472	0.209973	0.236225	0.25642	0.287678	0.314845	0.341201	0.362399	0.402935	0.456412	0.496281	0.546513	0.589413	0.650537	0.71748	0.785653	0.862727	0.962018	1.09024	1.25066	1.587	5.21915
0.0240194	0.0530046	0.078273	0.106488	0.13462	0.158951	0.180629	0.209991	0.236349	0.256742	0.287766	0.31555	0.341346	0.362531	0.403219	0.45737	0.496448	0.54703	0.590355	0.650691	0.717568	0.786968	0.863402	0.963627	1.09119	1.25319	1.58845	5.23479
0.0241977	0.0531325	0.0784273	0.106546	0.134686	0.159026	0.180728	0.210117	0.236386	0.256776	0.289671	0.315726	0.341666	0.364429	0.403431	0.457883	0.496801	0.548069	0.590479	0.651168	0.717691	0.787047	0.864635	0.965152	1.09279	1.25484	1.60388	6.20613
0.024203	0.0531991	0.0784804	0.106555	0.134742	0.159101	0.180943	0.210735	0.236682	0.256893	0.289884	0.316138	0.341965	0.364436	0.403525	0.458034	0.497324	0.548403	0.590888	0.651268	0.718644	0.787182	0.864743	0.966526	1.09308	1.25484	1.60643	7.67999
0.0242686	0.0532069	0.0786211	0.106619	0.134846	0.159214	0.181199	0.210751	0.236702	0.257203	0.289905	0.316156	0.34206	0.364482	0.404913	0.459314	0.497922	0.5488	0.591027	0.653145	0.718907	0.787377	0.866025	0.966809	1.09335	1.25484	1.60776	7.9594
0.0245316	0.053226	0.0786707	0.10685	0.135031	0.159245	0.181531	0.210812	0.236761	0.257232	0.290184	0.316293	0.342885	0.365998	0.405315	0.459728	0.50097	0.548807	0.591594	0.653894	0.719638	0.787897	0.867052	0.967964	1.09364	1.25484	1.61637	8.12969
0.0245724	0.0532691	0.0789862	0.10686	0.135178	0.15933	0.181627	0.210873	0.237481	0.25803	0.290953	0.316329	0.343475	0.366009	0.406134	0.45981	0.501467	0.548974	0.591821	0.654737	0.719783	0.788164	0.868515	0.968474	1.09604	1.25484	1.62469	9.21787
0.0246527	0.0535179	0.0790161	0.106958	0.135336	0.159333	0.182004	0.21094	0.238276	0.258138	0.291293	0.31675	0.344173	0.36762	0.407925	0.459933	0.502418	0.54927	0.592596	0.655841	0.724101	0.789106	0.868584	0.968655	1.10056	1.25484	1.62895	11.1302
0.0247422	0.0535367	0.0791055	0.106977	0.135455	0.159613	0.182289	0.211002	0.238474	0.258307	0.291478	0.318945	0.344862	0.368214	0.410092	0.459952	0.502468	0.550282	0.594024	0.657101	0.724596	0.790216	0.869014	0.968995	1.10056	1.25512	1.63964	11.9088
0.0248047	0.0535497	0.0791192	0.107155	0.135518	0.159718	0.183273	0.211154	0.238537	0.259267	0.291831	0.319049	0.344879	0.368988	0.410211	0.460038	0.503274	0.550282	0.594614	0.65748	0.72471	0.791912	0.871076	0.969426	1.10056	1.25577	1.63988	12.5329
0.0249982	0.053562	0.0792712	0.107557	0.135793	0.159959	0.183756	0.212	0.239076	0.260195	0.291884	0.319122	0.345796	0.369482	0.410667	0.460083	0.503597	0.550282	0.594672	0.658355	0.725602	0.792902	0.872403	0.969888	1.1011	1.25905	1.64467	13.8775
0.0250378	0.0537228	0.0792889	0.107708	0.135997	0.159977	0.184018	0.212722	0.239436	0.260628	0.292128	0.320093	0.346011	0.369766	0.410949	0.46118	0.504026	0.550282	0.595432	0.658614	0.726359	0.793449	0.873548	0.970625	1.10121	1.26188	1.64928	13.925
0.0250593	0.0537285	0.0792972	0.10789	0.136408	0.159983	0.184105	0.212856	0.239712	0.261102	0.292327	0.32045	0.346324	0.372263	0.411902	0.461185	0.504474	0.550282	0.595505	0.658661	0.726426	0.793568	0.874304	0.971894	1.1022	1.26352	1.64941	15.4807
0.0251561	0.0539705	0.0793218	0.108012	0.136426	0.160011	0.184115	0.212872	0.23997	0.261715	0.292353	0.320531	0.346461	0.372323	0.411956	0.462574	0.504844	0.550282	0.596084	0.659795	0.726529	0.794171	0.874493	0.971918	1.10386	1.2652	1.65085	16.3711
0.0254291	0.0542263	0.0793473	0.108143	0.136797	0.160098	0.184441	0.212997	0.240236	0.261916	0.292404	0.320672	0.346975	0.372493	0.412149	0.462796	0.505242	0.550282	0.59702	0.662605	0.726724	0.794489	0.874515	0.97694	1.10509	1.27057	1.65085	16.9091
0.0254445	0.0543345	0.079379	0.108183	0.136937	0.160199	0.18445	0.213427	0.240901	0.262074	0.292797	0.320773	0.347095	0.372647	0.412808	0.463612	0.506385	0.550282	0.599468	0.66277	0.727555	0.794612	0.874819	0.978248	1.10583	1.27365	1.65085	17.3916
0.0255004	0.0544753	0.0799515	0.10836	0.137048	0.160351	0.184653	0.21371	0.240951	0.262134	0.292971	0.320995	0.347177	0.37297	0.413009	0.464849	0.507028	0.550282	0.603177	0.662921	0.727639	0.795075	0.875119	0.978444	1.10762	1.27454	1.65085	18.663
0.0255327	0.0545819	0.0801825	0.108399	0.137386	0.160435	0.185291	0.213804	0.241116	0.262176	0.293362	0.321108	0.34732	0.373137	0.413209	0.464996	0.507371	0.550282	0.604309	0.662984	0.72873	0.795776	0.875144	0.978615	1.1079	1.2762	1.65515	19.3607
0.0255333	0.054756	0.0802312	0.108656	0.137676	0.160461	0.18534	0.213849	0.242798	0.262183	0.294411	0.32146	0.3475	0.373534	0.413704	0.465395	0.508062	0.550282	0.605396	0.663637	0.729183	0.795797	0.877056	0.979701	1.1093	1.27719	1.66481	21.0871
0.0255455	0.0548323	0.0802987	0.108906	0.137968	0.160542	0.185604	0.213955	0.242803	0.262466	0.294414	0.322016	0.347762	0.374459	0.413777	0.465484	0.508862	0.550282	0.606161	0.663839	0.730088	0.797127	0.877373	0.980423	1.10993	1.27802	1.66552	23.0744
0.0255855	0.0548499	0.0803206	0.109083	0.138353	0.160691	0.185639	0.214074	0.242842	0.262474	0.294575	0.322307	0.347789	0.375091	0.414399	0.468033	0.509155	0.550282	0.606181	0.663845	0.732372	0.798161	0.879045	0.982362	1.11027	1.28084	1.67813	29.1832
0.0255867	0.0549547	0.0804777	0.109093	0.138738	0.160787	0.185884	0.214347	0.242898	0.262526	0.294714	0.322429	0.348029	0.375921	0.414749	0.469145	0.509445	0.550282	0.606845	0.663922	0.732825	0.798807	0.879395	0.982652	1.112	1.28572	1.68174	29.1832
0.0256295	0.0549678	0.0805645	0.109249	0.138865	0.161088	0.186013	0.21472	0.242954	0.262599	0.294889	0.322529	0.348029	0.377187	0.415467	0.469701	0.510528	0.551731	0.607089	0.664547	0.733747	0.799404	0.879487	0.9834	1.11355	1.29191	1.68858	29.4174
0.0258366	0.0550141	0.0806712	0.109253	0.139006	0.161891	0.18607	0.215281	0.243871	0.262657	0.295362	0.324071	0.348029	0.377414	0.415919	0.470911	0.510895	0.551754	0.607159	0.665081	0.734386	0.800039	0.880357	0.983819	1.11406	1.29508	1.69466	30.2991
0.0258691	0.0551185	0.0807491	0.109347	0.139227	0.162231	0.187239	0.215411	0.244173	0.262896	0.295602	0.324172	0.348029	0.378191	0.416939	0.470964	0.511635	0.553582	0.608174	0.666475	0.734921	0.80017	0.881599	0.984375	1.11657	1.29859	1.70179	31.919
0.0258972	0.0551695	0.0808591	0.109611	0.139229	0.162357	0.187466	0.215538	0.244439	0.262912	0.296087	0.324545	0.348029	0.378693	0.418618	0.471375	0.511891	0.554465	0.608805	0.668514	0.736292	0.801206	0.882435	0.987459	1.11708	1.29901	1.70259	32.6613
0.0260284	0.0552294	0.0811125	0.109643	0.139502	0.162599	0.187504	0.21563	0.244534	0.263152	0.296948	0.324671	0.348029	0.379069	0.418714	0.472099	0.512439	0.55465	0.60925	0.671638	0.737434	0.801373	0.883224	0.987833	1.12038	1.29965	1.7059	33.8221
0.0260871	0.0555507	0.0812873	0.109704	0.139527	0.162872	0.187575	0.215723	0.244688	0.263191	0.298449	0.325167	0.348029	0.379768	0.419303	0.472418	0.513083	0.55465	0.609883	0.671964	0.737722	0.802507	0.885096	0.990848	1.12101	1.30057	1.72266	34.047
0.0261115	0.0555589	0.0816581	0.10971	0.139644	0.162985	0.188115	0.21589	0.244864	0.263402	0.298621	0.325682	0.348029	0.379794	0.419421	0.472863	0.513097	0.55465	0.610057	0.672204	0.737778	0.80264	0.88582	0.992823	1.12127	1.30245	1.72266	34.4103
0.0261937	0.0555699	0.0817461	0.10997	0.139646	0.163135	0.188134	0.216216	0.244912	0.263442	0.299158	0.326124	0.348029	0.380063	0.419964	0.473969	0.513171	0.55465	0.610444	0.672797	0.738112	0.803148	0.88712	0.993256	1.12496	1.30431	1.72266	34.4727
0.026235	0.0556955	0.0817759	0.110046	0.139963	0.163152	0.188593	0.216662	0.245208	0.263499	0.299386	0.326538	0.348029	0.380431	0.420545	0.474373	0.513704	0.55465	0.610638	0.672861	0.738281	0.803383	0.887304	0.994466	1.13096	1.30571	1.72305	34.6068
0.0262554	0.0557002	0.0818165	0.110054	0.140384	0.163231	0.188881	0.216673	0.245364	0.263579	0.299591	0.326948	0.348029	0.380874	0.421734	0.47438	0.514276	0.55465	0.611004	0.673001	0.738281	0.803527	0.887304	0.996685	1.13127	1.30838	1.72462	35.3256
0.0265111	0.0557933	0.0821946	0.11007	0.140412	0.163387	0.188886	0.216757	0.245386	0.264168	0.299611	0.326951	0.348029	0.381248	0.422217	0.475024	0.514569	0.55465	0.611213	0.673126	0.738281	0.803768	0.887776	0.998403	1.13261	1.31169	1.72701	35.983
0.0265282	0.0558368	0.0822691	0.110119	0.140527	0.163482	0.189524	0.217271	0.245618	0.264606	0.300032	0.327841	0.348029	0.381799	0.422892	0.47625	0.515081	0.55465	0.611471	0.673954	0.738281	0.804754	0.888292	0.99861	1.13463	1.32352	1.73633	36.036
0.0266015	0.0558588	0.0824084	0.110343	0.140558	0.163495	0.189739	0.217322	0.245741	0.264762	0.300195	0.328292	0.348029	0.382064	0.423359	0.47633	0.515936	0.554981	0.611788	0.675138	0.738281	0.80831	0.888807	0.999233	1.13522	1.32485	1.73636	36.6413
0.0267649	0.055889	0.0824962	0.110376	0.141499	0.163567	0.190027	0.217426	0.24583	0.265088	0.300802	0.328623	0.348029	0.382082	0.423441	0.476513	0.515963	0.555527	0.611924	0.676292	0.739459	0.81134	0.889894	1.00186	1.13539	1.32526	1.73681	37.9522
0.0268073	0.0559193	0.08253	0.110551	0.141883	0.163571	0.190101	0.217589	0.246042	0.265164	0.3012	0.32874	0.348091	0.382411	0.42349	0.476867	0.516443	0.555638	0.612018	0.676604	0.740644	0.811926	0.890745	1.00407	1.1384	1.32526	1.73844	39.708
0.0269787	0.0559564	0.0827011	0.110595	0.142084	0.164089	0.190253	0.21772	0.246094	0.265601	0.301297	0.328874	0.348291	0.383329	0.423812	0.477315	0.516873	0.557447	0.612441	0.676919	0.742664	0.81351	0.892088	1.0046	1.13912	1.32526	1.73874	42.2806
0.0269989	0.0560438	0.083107	0.110709	0.142104	0.164291	0.190549	0.217927	0.246094	0.265694	0.301577	0.329035	0.348365	0.383697	0.424061	0.477375	0.51709	0.557903	0.612794	0.677013	0.743523	0.814654	0.893823	1.00477	1.1405	1.32526	1.74015	43.5752
0.0270535	0.0562326	0.0832278	0.110772	0.142141	0.164573	0.190709	0.218062	0.246094	0.266407	0.301721	0.329192	0.348473	0.384117	0.424453	0.477629	0.518716	0.558227	0.613339	0.67746	0.744464	0.814989	0.894132	1.005	1.14431	1.32526	1.74082	45.0208
0.0270941	0.0564049	0.0833438	0.111003	0.142148	0.164927	0.190835	0.218462	0.246094	0.266839	0.301762	0.32932	0.348655	0.385015	0.426243	0.477862	0.518793	0.558664	0.613702	0.678091	0.744766	0.815241	0.894346	1.0052	1.14552	1.32526	1.74323	45.8067
0.0270985	0.0564851	0.0834755	0.111146	0.142377	0.165011	0.191131	0.218616	0.246094	0.267027	0.301838	0.32966	0.350301	0.38506	0.426462	0.478482	0.520141	0.558823	0.613773	0.678282	0.745313	0.815639	0.89638	1.00664	1.14563	1.32526	1.74737	46.8364
0.0271332	0.0564937	0.0835619	0.111251	0.142443	0.165304	0.191214	0.218889	0.246094	0.267487	0.30246	0.32967	0.350444	0.38582	0.426921	0.478543	0.520401	0.561303	0.614172	0.678991	0.747681	0.816406	0.89708	1.00702	1.14667	1.32793	1.749	47.1679
0.0271535	0.0565696	0.0837194	0.111847	0.142572	0.165327	0.191536	0.219074	0.246094	0.267536	0.302937	0.330354	0.350791	0.386225	0.427411	0.479489	0.520624	0.561496	0.614268	0.679722	0.749574	0.81647	0.897303	1.00753	1.14692	1.32846	1.751	47.3028
0.0273164	0.0566037	0.0837229	0.11185	0.14309	0.165726	0.191797	0.219133	0.246094	0.267638	0.302938	0.330555	0.350791	0.386416	0.427527	0.479615	0.521694	0.562258	0.614779	0.681299	0.750068	0.817287	0.898996	1.00762	1.1477	1.3291	1.75992	47.6238
0.0273233	0.0566755	0.0838585	0.112215	0.143195	0.16724	0.192294	0.219748	0.246094	0.267767	0.30303	0.330719	0.350791	0.386509	0.427858	0.480912	0.521948	0.562366	0.615851	0.682439	0.750613	0.820626	0.899602	1.00806	1.14931	1.33133	1.77001	49.392
0.0273358	0.056744	0.0841167	0.112225	0.143377	0.167412	0.192385	0.219974	0.246094	0.267879	0.303487	0.331213	0.350791	0.388664	0.427988	0.481001	0.522334	0.562404	0.6172	0.683435	0.751978	0.821266	0.899752	1.00912	1.15091	1.33469	1.77461	49.8599
0.0273411	0.056744	0.0841857	0.112322	0.143381	0.16798	0.192416	0.220075	0.246094	0.267891	0.303499	0.331317	0.350791	0.38876	0.428336	0.481086	0.522801	0.564012	0.617626	0.68441	0.753634	0.822058	0.900099	1.00994	1.15227	1.33577	1.77755	50.3389
0.0274571	0.0568567	0.0843069	0.112396	0.143486	0.168045	0.192512	0.221036	0.246094	0.268018	0.303646	0.331337	0.350791	0.389338	0.429025	0.481221	0.52295	0.564258	0.618578	0.684967	0.75532	0.822312	0.901306	1.01467	1.15263	1.33577	1.78465	50.9705
0.0274728	0.0570313	0.0844322	0.112662	0.143682	0.168156	0.192593	0.221103	0.246094	0.268034	0.303741	0.33178	0.350791	0.389586	0.431091	0.481328	0.523557	0.56494	0.618691	0.68552	0.756862	0.822462	0.901471	1.01467	1.15508	1.33597	1.78482	51.4416
0.0275081	0.0570732	0.084443	0.112861	0.14375	0.16864	0.192714	0.221243	0.246094	0.268043	0.303776	0.332094	0.351089	0.389837	0.43123	0.481999	0.524213	0.565322	0.618863	0.686334	0.757116	0.824037	0.902069	1.01467	1.15776	1.34116	1.79205	51.6326
0.0275645	0.0570983	0.0844755	0.112988	0.143981	0.168649	0.192735	0.221366	0.246094	0.268992	0.304029	0.332276	0.351156	0.38986	0.431319	0.483662	0.524677	0.566662	0.619487	0.68906	0.757655	0.824463	0.902137	1.01467	1.15797	1.342	1.79369	52.9467
0.0276549	0.0571112	0.0847742	0.113225	0.143989	0.168711	0.192834	0.221482	0.246094	0.269437	0.304171	0.332906	0.352151	0.389865	0.43151	0.484449	0.524968	0.566925	0.621126	0.689623	0.758887	0.825077	0.90242	1.01467	1.15843	1.34225	1.80193	52.9484
0.0277456	0.0572667	0.0848265	0.113343	0.144353	0.168849	0.193076	0.221562	0.246094	0.269503	0.304462	0.332958	0.352205	0.389868	0.431585	0.484751	0.525219	0.567233	0.621536	0.69028	0.761219	0.826151	0.904036	1.01524	1.15858	1.34592	1.80476	56.3759
0.027777	0.0574251	0.084952	0.113495	0.144364	0.169127	0.19322	0.221614	0.246094	0.270042	0.304585	0.333602	0.352895	0.391741	0.431765	0.485536	0.525247	0.567262	0.621612	0.6904	0.763094	0.826209	0.904178	1.01647	1.16034	1.34778	1.81678	56.5714
0.0278619	0.0576018	0.0850411	0.113706	0.144443	0.169265	0.193294	0.221668	0.246094	0.270203	0.30465	0.333739	0.353431	0.392024	0.432329	0.485703	0.525761	0.567792	0.621998	0.691825	0.764754	0.826546	0.905993	1.0167	1.16106	1.35379	1.81689	57.5153
0.0279691	0.0576432	0.0851812	0.114012	0.144485	0.169545	0.193674	0.222015	0.246094	0.270434	0.304952	0.333751	0.35364	0.392511	0.432384	0.48639	0.526054	0.568821	0.623726	0.691836	0.765494	0.827432	0.908752	1.0169	1.16308	1.357	1.82533	57.8666
0.028059	0.0578948	0.0852481	0.114078	0.144724	0.169566	0.193775	0.223695	0.246094	0.270635	0.305038	0.334197	0.353841	0.392525	0.432477	0.486493	0.526149	0.569939	0.623968	0.692503	0.766392	0.829481	0.909812	1.01923	1.16428	1.36043	1.83257	59.8052
0.0280601	0.0581719	0.0853354	0.114099	0.144741	0.169737	0.193849	0.224156	0.246094	0.270663	0.305138	0.334733	0.354044	0.392886	0.4325	0.486775	0.526367	0.570549	0.624079	0.693872	0.766407	0.831895	0.910345	1.01957	1.16473	1.36168	1.83802	61.3127
0.0281401	0.0582012	0.0855286	0.114108	0.144816	0.17025	0.194668	0.224478	0.246094	0.27074	0.305162	0.335019	0.354645	0.39361	0.434139	0.486854	0.526376	0.571089	0.6248	0.694573	0.767482	0.83221	0.910347	1.02189	1.16582	1.36765	1.85097	64.0553
0.0282537	0.0582142	0.0856012	0.114157	0.145067	0.170256	0.194745	0.22505	0.246094	0.270767	0.305439	0.335739	0.354712	0.3937	0.434902	0.487159	0.526431	0.572003	0.62504	0.694633	0.768401	0.833995	0.910547	1.02223	1.16631	1.36929	1.85334	64.4196
0.028285	0.0582267	0.085626	0.114307	0.145403	0.170802	0.195066	0.225188	0.246094	0.270781	0.30585	0.336335	0.354913	0.394467	0.436127	0.487236	0.526943	0.573056	0.625618	0.695385	0.768673	0.834573	0.910863	1.02272	1.16739	1.37025	1.87074	64.9365
0.0283146	0.0582485	0.0859775	0.114362	0.145443	0.171012	0.195125	0.225454	0.246094	0.270984	0.305868	0.336338	0.354936	0.395343	0.436226	0.487824	0.527093	0.573724	0.62643	0.695433	0.769271	0.835271	0.912412	1.02272	1.17134	1.37037	1.87078	65.2933
0.0285511	0.0583458	0.0862667	0.114475	0.146156	0.171221	0.195274	0.225691	0.246094	0.271653	0.306002	0.336453	0.355083	0.395776	0.436633	0.488501	0.527186	0.574825	0.628024	0.696058	0.770824	0.836081	0.912567	1.02315	1.17199	1.37285	1.8789	65.3995
0.0285734	0.0583825	0.0862738	0.114506	0.146169	0.171879	0.195316	0.225914	0.246094	0.272648	0.306372	0.336682	0.355977	0.396805	0.437098	0.48864	0.528611	0.574969	0.628109	0.696094	0.771214	0.836191	0.913625	1.02335	1.1722	1.38556	1.89167	65.4071
0.0287124	0.0585022	0.0863513	0.114544	0.146599	0.172069	0.195323	0.226103	0.246094	0.272839	0.306438	0.338392	0.356535	0.396964	0.437704	0.488788	0.529324	0.575184	0.628353	0.696326	0.77181	0.836244	0.914504	1.0245	1.17254	1.38829	1.91966	67.4305
0.0287214	0.0585416	0.0864858	0.114584	0.146904	0.172228	0.195572	0.226288	0.246094	0.273255	0.30659	0.338547	0.356644	0.398566	0.4379	0.489729	0.529614	0.57562	0.628686	0.69697	0.772166	0.838142	0.915345	1.02459	1.17992	1.38878	1.92205	67.5581
0.028794	0.0585437	0.0865818	0.114587	0.147131	0.17224	0.195973	0.22656	0.24654	0.2734	0.306734	0.338658	0.356975	0.398731	0.438752	0.491036	0.529914	0.576107	0.629966	0.69718	0.774591	0.839346	0.916217	1.02464	1.18028	1.39064	1.92205	67.7434
0.028851	0.0585772	0.0866341	0.114705	0.147289	0.172449	0.196422	0.226592	0.246804	0.273638	0.307244	0.338834	0.357603	0.399251	0.439588	0.491126	0.530205	0.576214	0.630389	0.697774	0.774955	0.84012	0.916866	1.02644	1.18048	1.40006	1.92332	78.855
0.0288689	0.0586433	0.0866608	0.114872	0.147463	0.173091	0.196649	0.226693	0.246906	0.273805	0.307585	0.339222	0.357995	0.399884	0.439965	0.491269	0.5303	0.576784	0.631269	0.69887	0.776841	0.840827	0.920538	1.02768	1.18245	1.40322	1.97945	82.038
0.0289665	0.0586935	0.0868214	0.115019	0.147864	0.173421	0.196741	0.226764	0.247206	0.274498	0.307833	0.339322	0.358176	0.400124	0.441438	0.491286	0.53063	0.577976	0.631789	0.699866	0.777854	0.84125	0.921672	1.03041	1.18287	1.40702	1.98061	84.6003
0.0290401	0.0587795	0.0870616	0.115034	0.147942	0.173506	0.19694	0.226804	0.247541	0.274761	0.308109	0.339327	0.358438	0.400474	0.441985	0.492188	0.531246	0.57825	0.633452	0.70113	0.777913	0.844133	0.921772	1.03091	1.1831	1.40801	1.98407	99.1305
0.0291057	0.0588484	0.0871805	0.115348	0.148145	0.173509	0.19701	0.226843	0.24755	0.274944	0.308732	0.339616	0.35896	0.400888	0.442184	0.492188	0.532183	0.579715	0.633938	0.701583	0.778023	0.844353	0.92271	1.03204	1.18422	1.41028	1.98407	101.37
0.0291432	0.0589754	0.087309	0.115493	0.148173	0.173852	0.19713	0.226845	0.247705	0.274996	0.308919	0.339643	0.359156	0.400896	0.442553	0.492188	0.532301	0.579726	0.63446	0.701863	0.778217	0.844688	0.923709	1.03229	1.18476	1.4106	1.98811	103.276
0.0292287	0.0591983	0.0876573	0.115562	0.148251	0.173862	0.197728	0.226936	0.247947	0.27519	0.308951	0.339645	0.360104	0.401146	0.442572	0.492188	0.532351	0.581319	0.634729	0.702452	0.778217	0.84652	0.923829	1.03229	1.18496	1.41237	1.99096
0.0292474	0.0592193	0.0876824	0.115718	0.148318	0.174169	0.198086	0.227081	0.248047	0.275268	0.30904	0.339952	0.360138	0.401162	0.442639	0.492188	0.533754	0.58195	0.63706	0.704295	0.778217	0.846538	0.923858	1.03321	1.18531	1.42105	2.00529
0.0293061	0.0592428	0.0876886	0.115744	0.148393	0.174321	0.198117	0.227109	0.248047	0.275378	0.309533	0.339957	0.360693	0.402116	0.442956	0.492188	0.533837	0.582759	0.637373	0.704737	0.778217	0.847024	0.92545	1.03487	1.18764	1.42355	2.00718
0.0293495	0.0595004	0.0877666	0.116	0.148456	0.174352	0.198304	0.227126	0.248047	0.275543	0.310354	0.340036	0.360956	0.403093	0.443347	0.492188	0.534923	0.582943	0.639894	0.705882	0.778217	0.847332	0.925705	1.0351	1.19044	1.42584	2.02152
0.02952	0.0595177	0.0877869	0.116171	0.148616	0.174538	0.198472	0.227638	0.248047	0.275599	0.310431	0.340766	0.361765	0.403323	0.44363	0.492188	0.534925	0.583124	0.639961	0.706186	0.778217	0.847731	0.926574	1.03533	1.19082	1.426	2.02763
0.0295223	0.0596119	0.0879613	0.116268	0.148659	0.174635	0.198488	0.227956	0.248047	0.276217	0.310644	0.341278	0.362947	0.404385	0.445291	0.492188	0.535457	0.583129	0.640601	0.70658	0.778988	0.848577	0.928761	1.03543	1.19233	1.42836	2.02934
0.0295354	0.0596722	0.0881464	0.116406	0.148701	0.174909	0.199239	0.227958	0.248047	0.276246	0.311389	0.341326	0.363463	0.404512	0.44531	0.492188	0.535529	0.584005	0.641011	0.706715	0.779104	0.849518	0.930065	1.03802	1.19425	1.43447	2.02934
0.0295825	0.0597279	0.0881968	0.116749	0.149029	0.175029	0.199428	0.227979	0.248047	0.276321	0.311723	0.342004	0.363683	0.405533	0.44552	0.492188	0.536055	0.584509	0.641108	0.706751	0.780613	0.850275	0.930942	1.04044	1.19546	1.43496	2.04571
0.0297094	0.0599319	0.0883474	0.116959	0.14906	0.175034	0.199519	0.228087	0.248047	0.276388	0.312065	0.342153	0.364017	0.405827	0.446309	0.492188	0.536223	0.585091	0.64175	0.706777	0.780742	0.851295	0.931168	1.04304	1.19824	1.43613	2.0655
0.0297124	0.0599562	0.0884167	0.11728	0.149069	0.175097	0.199521	0.228324	0.248047	0.276603	0.312153	0.342303	0.364646	0.406501	0.446363	0.492188	0.536257	0.585168	0.642203	0.707321	0.78085	0.851734	0.932653	1.04409	1.19913	1.43711	2.0739
0.0298436	0.0601251	0.088533	0.117289	0.14908	0.175401	0.199696	0.228457	0.248047	0.277248	0.312284	0.342392	0.365844	0.406916	0.447082	0.492629	0.536806	0.58518	0.642921	0.707869	0.782209	0.851937	0.934634	1.04448	1.20204	1.43888	2.07908
0.0298872	0.0602107	0.0886882	0.117323	0.149091	0.175514	0.20031	0.228638	0.248047	0.277272	0.312423	0.343015	0.365845	0.407277	0.448874	0.493069	0.537351	0.585453	0.643641	0.708073	0.783101	0.852251	0.934712	1.04499	1.2026	1.44018	2.08241
0.0299487	0.0602107	0.0887099	0.117354	0.149212	0.175578	0.200354	0.228638	0.248047	0.277361	0.312578	0.343108	0.366196	0.407332	0.449028	0.493218	0.540807	0.585527	0.643754	0.708549	0.783245	0.852532	0.934959	1.04637	1.20414	1.44028	2.09948
0.0300358	0.0602708	0.0887939	0.117521	0.149642	0.175749	0.200587	0.228715	0.248047	0.277724	0.312612	0.343866	0.366504	0.407415	0.449324	0.493223	0.542128	0.58589	0.644234	0.708855	0.783415	0.852553	0.936084	1.04887	1.20959	1.44055	2.1288
0.0301405	0.0602901	0.0889305	0.11777	0.149845	0.175811	0.200729	0.228736	0.248047	0.278167	0.31344	0.343982	0.366791	0.407559	0.44942	0.494178	0.543431	0.586792	0.645079	0.709201	0.784393	0.852572	0.937083	1.05198	1.21165	1.44253	2.13198
0.0302067	0.0603497	0.0890694	0.118105	0.149857	0.176604	0.200935	0.228792	0.248047	0.278197	0.313888	0.34435	0.366837	0.407639	0.449784	0.494772	0.543575	0.587029	0.645086	0.709394	0.784393	0.854592	0.939227	1.05224	1.21339	1.4443	2.14878
0.0303028	0.0603672	0.089804	0.118372	0.149859	0.176811	0.201402	0.228797	0.248047	0.278841	0.314613	0.344363	0.366937	0.407651	0.449888	0.494782	0.543712	0.587103	0.645459	0.709433	0.784393	0.855891	0.941408	1.05237	1.21702	1.4484	2.15445
0.0303277	0.0605772	0.0898916	0.118469	0.150175	0.177005	0.201614	0.228894	0.248047	0.279261	0.314658	0.345017	0.367835	0.407794	0.450433	0.49481	0.54386	0.58835	0.646036	0.710011	0.785047	0.857218	0.941773	1.05454	1.21844	1.45076	2.15718
0.0303806	0.0607071	0.0899	0.118608	0.15028	0.177088	0.201648	0.22911	0.248252	0.279501	0.314764	0.345274	0.368317	0.408812	0.451143	0.494831	0.544037	0.590025	0.646263	0.71013	0.785101	0.857241	0.942586	1.05732	1.21976	1.45169	2.20481
0.0304127	0.0609113	0.0901981	0.118832	0.150397	0.177213	0.201754	0.229218	0.249213	0.279935	0.314864	0.345397	0.36902	0.409473	0.451839	0.495188	0.544403	0.590129	0.646656	0.710366	0.785145	0.857502	0.945779	1.0582	1.22097	1.45559	2.21484
0.0304401	0.0611217	0.0902116	0.118913	0.150448	0.177395	0.201979	0.229224	0.249347	0.280155	0.315125	0.346125	0.370608	0.4095	0.452106	0.495344	0.544505	0.591318	0.647152	0.710452	0.785908	0.858178	0.945784	1.05963	1.22386	1.45648	2.22847
0.030465	0.0611736	0.0902891	0.119225	0.150547	0.17782	0.202126	0.229592	0.249383	0.280746	0.3157	0.346421	0.370966	0.409624	0.452881	0.495375	0.544743	0.591404	0.647258	0.712032	0.787047	0.858203	0.946	1.05983	1.22664	1.45692	2.2598
0.0305479	0.0612101	0.0904562	0.119725	0.150594	0.177836	0.202164	0.229641	0.249758	0.280844	0.315753	0.347088	0.371218	0.409664	0.45303	0.495546	0.545883	0.591715	0.647404	0.712436	0.787319	0.858881	0.94652	1.06363	1.23047	1.46206	2.26887
0.0306318	0.0612384	0.0905281	0.119829	0.150624	0.17804	0.202534	0.229925	0.249828	0.28087	0.31623	0.347118	0.371494	0.410674	0.45365	0.495674	0.546158	0.592025	0.648454	0.71438	0.787358	0.859164	0.94677	1.06369	1.23047	1.46974	2.3112
0.0306841	0.0613027	0.0905428	0.119897	0.150664	0.178298	0.202588	0.230468	0.249832	0.280992	0.316348	0.347443	0.371613	0.410703	0.453845	0.496094	0.547063	0.592528	0.649591	0.714649	0.787603	0.85954	0.947118	1.06383	1.23047	1.47065	2.31768
0.0307088	0.0614131	0.0906678	0.120094	0.151142	0.178309	0.202934	0.230614	0.250945	0.281409	0.316671	0.348029	0.372784	0.411145	0.453919	0.496094	0.547161	0.593808	0.650052	0.716394	0.787794	0.860164	0.947256	1.06559	1.23047	1.47656	2.32164
0.0307088	0.0614329	0.0906923	0.120132	0.151335	0.179034	0.203386	0.231034	0.251442	0.281717	0.317053	0.348029	0.373723	0.411226	0.454143	0.496094	0.547757	0.593988	0.650427	0.716831	0.788253	0.860754	0.948006	1.06714	1.23047	1.4781	2.32361
0.0307617	0.0615876	0.0907404	0.120262	0.151351	0.179035	0.203966	0.231263	0.25173	0.282246	0.317169	0.348029	0.373733	0.411653	0.454144	0.496336	0.548175	0.594412	0.65081	0.718633	0.788915	0.861016	0.948417	1.07256	1.23268	1.4815	2.33465
0.0307679	0.0617009	0.0909389	0.120347	0.151606	0.179161	0.204229	0.231387	0.251748	0.282303	0.317302	0.348029	0.374416	0.412765	0.454731	0.497073	0.548324	0.594633	0.650817	0.718959	0.789491	0.861917	0.94952	1.07311	1.2365	1.48247	2.34007
0.0307788	0.0617408	0.0911313	0.120347	0.151947	0.179338	0.204762	0.231742	0.251829	0.2824	0.317646	0.348029	0.374463	0.413044	0.454866	0.497309	0.548412	0.595312	0.651513	0.720743	0.789706	0.862018	0.94999	1.07364	1.23846	1.48524	2.36795
0.0308404	0.0617525	0.0915472	0.120351	0.152434	0.179408	0.205098	0.232056	0.252206	0.282627	0.31793	0.348029	0.37659	0.414198	0.455654	0.498174	0.548492	0.59546	0.651938	0.721183	0.789997	0.862161	0.951422	1.07421	1.24057	1.48684	2.46094
0.0308968	0.061834	0.0915804	0.120578	0.152721	0.179489	0.205256	0.232267	0.252353	0.282732	0.318057	0.348029	0.376851	0.414458	0.455813	0.499279	0.549298	0.595997	0.653382	0.72125	0.790123	0.863035	0.951934	1.07648	1.24245	1.48828	2.46094
0.0310616	0.0619739	0.0916286	0.120588	0.152826	0.179644	0.205351	0.232439	0.25237	0.283293	0.318417	0.348029	0.377528	0.414697	0.455846	0.49932	0.550282	0.596952	0.653642	0.721796	0.790281	0.863264	0.95223	1.07799	1.24247	1.49347	2.46505
0.0311481	0.0620607	0.0916831	0.120929	0.152928	0.179939	0.205354	0.232539	0.252902	0.28332	0.318498	0.348029	0.377756	0.415135	0.456675	0.500282	0.550282	0.597143	0.653811	0.722247	0.790676	0.864901	0.952239	1.07981	1.24327	1.49518	2.47321
0.0311727	0.0621017	0.0917702	0.121142	0.153016	0.18068	0.205526	0.232688	0.252967	0.28368	0.318502	0.348029	0.378142	0.415356	0.457027	0.501105	0.550282	0.598337	0.654763	0.722361	0.790684	0.864998	0.953071	1.08286	1.24538	1.49556	2.48047
0.0312764	0.0621094	0.0919855	0.121604	0.153169	0.181884	0.205678	0.232736	0.253359	0.283683	0.318782	0.348029	0.378171	0.415598	0.457616	0.501202	0.550282	0.599238	0.655161	0.723323	0.791029	0.866018	0.953452	1.08485	1.24656	1.49693	2.48531
0.0313463	0.0622341	0.092167	0.121702	0.153194	0.182067	0.206064	0.233057	0.253581	0.283694	0.319217	0.348029	0.378572	0.416672	0.457697	0.501665	0.550282	0.599271	0.656086	0.725255	0.791818	0.86698	0.953512	1.08682	1.2466	1.50148	2.50083
0.031377	0.062292	0.0923099	0.121842	0.153284	0.182187	0.206374	0.233177	0.254045	0.283812	0.319336	0.348029	0.379123	0.416898	0.458273	0.502061	0.550282	0.600989	0.656092	0.725669	0.793794	0.867013	0.954152	1.08737	1.24666	1.50379	2.50967
0.0314172	0.0623304	0.0924181	0.121849	0.153666	0.182259	0.206759	0.233719	0.254374	0.283882	0.319448	0.348029	0.379126	0.417357	0.45879	0.502162	0.550282	0.601229	0.65654	0.726941	0.794452	0.867592	0.955601	1.08781	1.24758	1.51862	2.52336
0.0314201	0.0623422	0.0925313	0.121869	0.153806	0.182264	0.206773	0.233914	0.254412	0.283979	0.320053	0.348029	0.380018	0.417847	0.459224	0.502519	0.550282	0.601473	0.658247	0.727692	0.795126	0.867778	0.959648	1.08815	1.25269	1.51946	2.52959
0.0315481	0.0624431	0.092779	0.122265	0.153998	0.182708	0.206783	0.234028	0.25451	0.284041	0.320188	0.348029	0.380127	0.41874	0.459928	0.502577	0.550282	0.602132	0.658885	0.728075	0.795791	0.868357	0.959929	1.08855	1.25397	1.51966	2.53123
0.0315663	0.0625107	0.0928011	0.122387	0.154148	0.182995	0.207067	0.234351	0.254606	0.28445	0.320687	0.348029	0.380525	0.419351	0.460589	0.503424	0.550282	0.602527	0.659502	0.729237	0.796915	0.868946	0.95996	1.08934	1.25458	1.53976	2.53944
0.031583	0.0625544	0.092877	0.122518	0.154168	0.183529	0.207392	0.234546	0.254691	0.284694	0.32078	0.348029	0.380786	0.419421	0.461068	0.50379	0.550282	0.603841	0.659817	0.733121	0.79702	0.870542	0.960524	1.08951	1.25484	1.54183	2.56929
0.0315838	0.0625597	0.0928955	0.122608	0.15446	0.183788	0.20762	0.234719	0.254835	0.284707	0.321509	0.348029	0.380919	0.419883	0.461084	0.503916	0.550282	0.60426	0.660361	0.73393	0.797137	0.871231	0.960611	1.0924	1.25484	1.54415	2.58969
0.0316017	0.0625904	0.093167	0.122689	0.154524	0.184109	0.208271	0.234761	0.255239	0.285152	0.321881	0.348029	0.38106	0.420513	0.461679	0.5044	0.550476	0.606151	0.660809	0.734487	0.797244	0.872118	0.96069	1.09506	1.25484	1.5456	2.71819
0.0317117	0.0626979	0.09331	0.122762	0.154735	0.184287	0.208524	0.235004	0.255511	0.285826	0.322026	0.348029	0.381077	0.420576	0.461683	0.504423	0.550487	0.606818	0.662904	0.735125	0.797497	0.872249	0.962527	1.09518	1.25484	1.54796	2.74186
0.031813	0.0627346	0.0933287	0.122831	0.15488	0.1843	0.208724	0.235163	0.255521	0.286278	0.322059	0.348029	0.381268	0.42066	0.462508	0.50487	0.550559	0.606845	0.664669	0.735436	0.798557	0.872949	0.962721	1.09621	1.25484	1.54848	2.77325
0.0318872	0.0628943	0.0933503	0.122877	0.155138	0.184638	0.208941	0.235218	0.255657	0.28665	0.322108	0.348192	0.381427	0.420746	0.462662	0.504889	0.550614	0.607168	0.665132	0.736801	0.799034	0.873568	0.962747	1.09673	1.25484	1.5537	2.96336
0.0319775	0.0629271	0.0934652	0.122886	0.15519	0.184683	0.208974	0.235238	0.255802	0.286882	0.322715	0.348299	0.382231	0.420899	0.462757	0.504918	0.551129	0.608049	0.665147	0.736892	0.799622	0.874772	0.964198	1.09956	1.25484	1.55414	3.25697
0.0319943	0.0629377	0.0937337	0.122914	0.155405	0.184833	0.209037	0.23543	0.256181	0.286948	0.322722	0.348405	0.382931	0.42128	0.462867	0.505485	0.551583	0.608117	0.665157	0.738281	0.799684	0.874918	0.964757	1.10056	1.25484	1.55416	3.25719
0.0320085	0.0630308	0.0937776	0.122972	0.155689	0.185232	0.209444	0.235732	0.257013	0.287081	0.32293	0.348907	0.382963	0.424384	0.463039	0.505635	0.551752	0.60814	0.665601	0.738281	0.801047	0.875855	0.966372	1.10061	1.25484	1.55748	3.51043
0.032071	0.0630333	0.0940304	0.122977	0.155837	0.185724	0.209459	0.236082	0.257399	0.287151	0.323191	0.348985	0.383275	0.424762	0.463207	0.505708	0.551785	0.608288	0.666426	0.738281	0.802118	0.876151	0.968694	1.10107	1.25995	1.56426	3.8587
0.0320832	0.0630537	0.0940552	0.123374	0.155885	0.185752	0.209844	0.236151	0.257415	0.287566	0.323273	0.350791	0.383647	0.425	0.463389	0.50579	0.551963	0.608453	0.666714	0.738281	0.802553	0.877105	0.969057	1.10167	1.26	1.56879	3.88834
0.0320991	0.0632931	0.0940666	0.12367	0.156005	0.185924	0.209846	0.236456	0.257415	0.288091	0.323295	0.350791	0.383961	0.425218	0.463721	0.506475	0.552825	0.609063	0.66748	0.738281	0.802919	0.877942	0.969288	1.10182	1.26034	1.57091	3.97924
0.0321475	0.063443	0.0942726	0.123682	0.156184	0.186167	0.209939	0.236485	0.257428	0.288185	0.324259	0.350791	0.384209	0.425304	0.463992	0.506536	0.552858	0.610253	0.668113	0.738281	0.80305	0.878499	0.969324	1.10206	1.26132	1.57472	4.06926
0.0321593	0.0635285	0.0944016	0.124205	0.156377	0.186249	0.21015	0.236745	0.257436	0.288221	0.325918	0.350791	0.384431	0.426729	0.46457	0.506895	0.553229	0.610757	0.668551	0.738281	0.803082	0.879267	0.969501	1.10316	1.26242	1.57577	4.37475
0.0321708	0.0635346	0.0945079	0.124285	0.156705	0.186709	0.210223	0.236898	0.257843	0.288252	0.326018	0.350791	0.385147	0.42674	0.46538	0.507251	0.553231	0.611447	0.668842	0.738379	0.803527	0.881022	0.970419	1.10418	1.26247	1.57577	4.63588
0.0322002	0.0635552	0.0946156	0.124292	0.156722	0.187013	0.210278	0.236963	0.25816	0.2883	0.326434	0.350791	0.385488	0.426795	0.465751	0.507335	0.553554	0.611667	0.668874	0.738603	0.805337	0.881551	0.970632	1.1045	1.26337	1.57903	4.81691
0.0322383	0.0636031	0.0946193	0.124517	0.157038	0.187042	0.210513	0.236977	0.258325	0.288326	0.326747	0.350791	0.386191	0.426978	0.466795	0.50782	0.55465	0.611924	0.67407	0.738636	0.806589	0.881993	0.971139	1.10485	1.26438	1.5806	4.89844
0.0322498	0.0637835	0.0946205	0.1247	0.157185	0.187095	0.210736	0.237313	0.258352	0.288561	0.327079	0.350791	0.386363	0.427148	0.467283	0.508084	0.55465	0.612049	0.675679	0.739452	0.807559	0.882232	0.972386	1.10926	1.27069	1.58152	5.01767
0.0322636	0.0637903	0.0946442	0.124717	0.157397	0.187132	0.211132	0.237508	0.259181	0.288896	0.327118	0.350791	0.386447	0.42802	0.467813	0.508931	0.55465	0.612515	0.676637	0.740577	0.80879	0.882822	0.974843	1.1094	1.27127	1.58338	5.06391
0.0322667	0.0638235	0.0946654	0.124872	0.157525	0.187344	0.21114	0.237793	0.259363	0.289017	0.327135	0.350858	0.386719	0.428235	0.467976	0.509513	0.55465	0.612773	0.677065	0.741498	0.809851	0.883224	0.977441	1.10963	1.27479	1.5858	5.07277
0.0323501	0.0638527	0.0947059	0.124894	0.157688	0.187382	0.211151	0.237798	0.259758	0.289748	0.327478	0.350954	0.387072	0.428334	0.468748	0.509912	0.55465	0.613183	0.678157	0.741769	0.810197	0.883634	0.978461	1.11008	1.27749	1.58983	5.10572
0.0323742	0.0638689	0.0948001	0.125146	0.158101	0.187405	0.211471	0.238173	0.259866	0.28992	0.327748	0.351476	0.387195	0.428381	0.468965	0.510109	0.55465	0.61354	0.678348	0.741989	0.810274	0.883886	0.978586	1.11317	1.2856	1.59448	5.13834
0.0324139	0.0638798	0.0948056	0.1252	0.158169	0.187614	0.211666	0.238356	0.259924	0.289953	0.32806	0.351935	0.38725	0.428451	0.46935	0.51057	0.554689	0.61386	0.678392	0.742012	0.810665	0.884397	0.979019	1.11464	1.29134	1.59494	5.15393
0.0324139	0.0639844	0.0948087	0.125418	0.158182	0.188015	0.211692	0.238571	0.260107	0.290302	0.328305	0.35199	0.387696	0.428523	0.470546	0.510594	0.554776	0.615045	0.678727	0.743085	0.810863	0.884647	0.979242	1.1158	1.29205	1.60605	5.57416
0.0324594	0.064072	0.0948181	0.125453	0.158269	0.188105	0.211754	0.238614	0.260281	0.290514	0.328967	0.352372	0.387741	0.428657	0.470609	0.511069	0.555225	0.615637	0.679636	0.744141	0.811059	0.884773	0.979513	1.11643	1.29314	1.61661	7.64191
0.032493	0.0643625	0.0948419	0.125806	0.158352	0.188178	0.211865	0.238652	0.260448	0.290736	0.329252	0.352477	0.387858	0.428996	0.470904	0.511071	0.555407	0.615676	0.679667	0.744141	0.811145	0.884777	0.982781	1.11803	1.29386	1.61682	7.95299
0.0325768	0.0643625	0.0948731	0.126116	0.158391	0.188663	0.211964	0.239044	0.260493	0.290737	0.329418	0.352494	0.387878	0.429694	0.470943	0.511578	0.555593	0.615856	0.679689	0.744141	0.811447	0.885319	0.984317	1.11888	1.2951	1.61689	8.31221
0.0326325	0.064402	0.0949425	0.126424	0.15843	0.188777	0.21205	0.239114	0.260507	0.290836	0.329464	0.352608	0.388089	0.429933	0.471135	0.511951	0.556542	0.616406	0.681916	0.74539	0.812823	0.885505	0.984375	1.12145	1.29566	1.61746	8.70537
0.0326631	0.0644251	0.0950771	0.126557	0.158431	0.18892	0.212261	0.239247	0.260692	0.290987	0.329761	0.352719	0.389382	0.430121	0.471166	0.512392	0.557421	0.616446	0.682244	0.745424	0.813238	0.885604	0.984375	1.12181	1.2957	1.61906	8.94897
0.0327929	0.0645152	0.095274	0.126797	0.158495	0.189073	0.212299	0.239314	0.260761	0.291066	0.329766	0.353567	0.39024	0.430451	0.471495	0.512426	0.558122	0.6172	0.68298	0.745665	0.813496	0.886498	0.984375	1.12234	1.29965	1.63235	10.5296
0.0328302	0.0646129	0.0952784	0.126947	0.158858	0.189207	0.212422	0.240089	0.260787	0.291422	0.329872	0.353716	0.390379	0.43151	0.473288	0.512757	0.558163	0.61766	0.683822	0.746035	0.813733	0.887304	0.984375	1.12354	1.29992	1.63957	10.898
0.032894	0.0647167	0.0953181	0.12696	0.159019	0.189234	0.212534	0.240111	0.260837	0.291615	0.329919	0.35379	0.390514	0.431902	0.473485	0.513913	0.558764	0.61871	0.684043	0.746238	0.81424	0.889045	0.98477	1.12394	1.30411	1.64026	12.138
0.0329642	0.0648195	0.0954556	0.127092	0.159131	0.189341	0.212572	0.240115	0.260868	0.291944	0.330143	0.354177	0.391227	0.432031	0.473959	0.514559	0.559022	0.618756	0.684051	0.749197	0.814325	0.889071	0.984795	1.12394	1.30455	1.64288	12.4321
0.0329768	0.0649811	0.0955139	0.12718	0.159346	0.189526	0.21309	0.240718	0.261	0.29204	0.330742	0.354264	0.391554	0.432091	0.474034	0.514679	0.559242	0.618801	0.684079	0.749305	0.81443	0.88978	0.986711	1.12433	1.30799	1.65085	12.5504
0.0330273	0.0651716	0.0955374	0.127282	0.159567	0.189531	0.213153	0.2411	0.261153	0.292438	0.330887	0.354683	0.391688	0.432429	0.474443	0.514721	0.559471	0.61898	0.684366	0.750399	0.814864	0.890126	0.988238	1.12473	1.31043	1.65085	13.4408
0.0330628	0.0652413	0.0955807	0.127407	0.159636	0.189719	0.213218	0.241219	0.261416	0.293036	0.331082	0.354831	0.391791	0.432638	0.474533	0.514781	0.559964	0.619668	0.684734	0.750522	0.815159	0.890399	0.989227	1.1255	1.31145	1.66116	14.4503
0.0331053	0.0652544	0.0957555	0.127666	0.159651	0.189903	0.213298	0.241509	0.26164	0.293484	0.331262	0.354861	0.391814	0.433165	0.47484	0.514979	0.560634	0.620587	0.684914	0.75057	0.815261	0.891287	0.989636	1.12728	1.31147	1.66544	14.723
0.0331862	0.0653736	0.0958755	0.127837	0.16003	0.190168	0.213397	0.241757	0.261906	0.294334	0.331353	0.355854	0.392952	0.433298	0.475139	0.515013	0.561451	0.621665	0.685568	0.750585	0.81581	0.891955	0.989691	1.12759	1.31154	1.6777	15.6289
0.0332265	0.0655453	0.0960617	0.127907	0.160036	0.190183	0.213418	0.242358	0.261964	0.294409	0.331396	0.355909	0.392967	0.433588	0.475156	0.51552	0.561709	0.62176	0.685587	0.751335	0.817907	0.893133	0.991173	1.1288	1.31186	1.67926	16.0337
0.0332768	0.0657112	0.0961282	0.127954	0.160083	0.19025	0.214363	0.242389	0.26259	0.294492	0.331445	0.355977	0.393674	0.433717	0.476157	0.515741	0.562469	0.621983	0.687014	0.751736	0.818034	0.894346	0.991929	1.13049	1.3129	1.68133	16.4011
0.0334554	0.0658715	0.0961658	0.128089	0.160464	0.190401	0.214429	0.242575	0.262886	0.294732	0.331766	0.356677	0.393996	0.434091	0.476844	0.516295	0.563003	0.622091	0.687128	0.752254	0.818078	0.894346	0.993539	1.13213	1.31428	1.68826	17.0121
0.0334688	0.0660625	0.0961885	0.128118	0.160518	0.190404	0.214656	0.242896	0.26291	0.294821	0.331836	0.356765	0.394244	0.434142	0.477121	0.516357	0.563524	0.622366	0.689446	0.753048	0.818854	0.894444	0.993577	1.13528	1.31534	1.69235	17.4269
0.0335918	0.0660904	0.0962326	0.128123	0.160848	0.190722	0.21467	0.242992	0.263194	0.29484	0.332371	0.357111	0.394884	0.434554	0.477436	0.51636	0.563652	0.62237	0.689544	0.753075	0.820318	0.894682	0.99518	1.13534	1.3251	1.69813	17.5516
0.0337357	0.0661009	0.0963697	0.128164	0.161097	0.19119	0.214777	0.243003	0.263267	0.295073	0.33255	0.357163	0.395425	0.4347	0.477724	0.516445	0.564012	0.622503	0.689861	0.753799	0.820392	0.894964	0.995682	1.13963	1.32526	1.69909	18.8758
0.0337528	0.0661093	0.0965925	0.128249	0.161225	0.191199	0.214978	0.243298	0.263316	0.295076	0.332958	0.357637	0.395792	0.434862	0.477785	0.516528	0.565043	0.622611	0.690199	0.755404	0.820599	0.896282	0.997566	1.13994	1.32526	1.70529	18.9314
0.0340271	0.0661313	0.0966826	0.128537	0.161298	0.191219	0.215058	0.243642	0.263561	0.295623	0.334411	0.358326	0.39623	0.435353	0.477916	0.517748	0.565296	0.622752	0.690263	0.755666	0.820626	0.896549	0.998178	1.14012	1.32995	1.7157	20.9346
0.0340331	0.066177	0.096776	0.128719	0.161372	0.191519	0.215091	0.243883	0.263648	0.295742	0.334916	0.358602	0.396679	0.435776	0.478573	0.518345	0.565797	0.623586	0.691116	0.756103	0.820739	0.896665	1.00134	1.14247	1.33057	1.71661	22.741
0.0341408	0.0661841	0.0970574	0.128747	0.161609	0.191613	0.215547	0.243977	0.263865	0.295797	0.334934	0.358958	0.396942	0.435959	0.478943	0.518827	0.565811	0.6239	0.69149	0.756402	0.820762	0.896774	1.00136	1.14529	1.33099	1.72266	27.3858
0.0342126	0.0662628	0.0973606	0.12898	0.161713	0.191693	0.215845	0.24469	0.264345	0.29598	0.334987	0.361053	0.397334	0.436036	0.479632	0.518954	0.565829	0.624196	0.69186	0.756543	0.821264	0.89821	1.00709	1.14531	1.33116	1.72266	29.1422
0.034359	0.0662652	0.0973724	0.129027	0.16183	0.191731	0.215909	0.244741	0.264455	0.296289	0.335407	0.361058	0.397494	0.436866	0.480033	0.519234	0.566654	0.62499	0.692231	0.758896	0.822066	0.899431	1.00713	1.14559	1.33183	1.72266	29.3514
0.0344927	0.0663049	0.0973743	0.129097	0.162125	0.191897	0.216603	0.244772	0.264651	0.296505	0.335524	0.361095	0.397804	0.43816	0.48006	0.521167	0.567638	0.625196	0.692855	0.758972	0.822764	0.899643	1.00737	1.14622	1.33226	1.73032	29.4999
0.0346322	0.0663387	0.098042	0.129108	0.162225	0.191944	0.216645	0.244896	0.264656	0.296686	0.33593	0.361133	0.398315	0.439089	0.480227	0.521194	0.567978	0.625426	0.693107	0.760842	0.822979	0.901787	1.00814	1.14928	1.336	1.73603	29.6704
0.0346669	0.0664202	0.0981113	0.129146	0.162346	0.192063	0.216735	0.244964	0.264785	0.296687	0.336247	0.361418	0.398379	0.439126	0.480533	0.52128	0.568139	0.625575	0.694018	0.761009	0.823012	0.902568	1.00912	1.15246	1.33684	1.73633	29.8173
0.0347093	0.0665292	0.098114	0.129212	0.162508	0.192086	0.216829	0.245059	0.264789	0.296889	0.336338	0.361554	0.398429	0.439372	0.480581	0.521406	0.568183	0.625583	0.694423	0.761932	0.823304	0.903587	1.01086	1.15373	1.34006	1.73633	31.5489
0.0348029	0.0665702	0.0982738	0.129465	0.16285	0.192122	0.216975	0.245104	0.264819	0.297406	0.336349	0.361608	0.398584	0.441082	0.481452	0.521408	0.568622	0.626257	0.694847	0.761965	0.823877	0.904111	1.01147	1.15671	1.3426	1.73743	31.6462
0.0348138	0.0666558	0.0984874	0.129796	0.162895	0.192251	0.216977	0.245155	0.264936	0.297479	0.336582	0.361759	0.398712	0.441139	0.481789	0.521869	0.568681	0.626283	0.694997	0.762983	0.825102	0.904725	1.01297	1.15715	1.34442	1.74015	32.9133
0.0348868	0.0667783	0.0985473	0.129872	0.162921	0.192623	0.217202	0.245234	0.265183	0.297801	0.336786	0.362003	0.398888	0.441233	0.482369	0.522866	0.56885	0.627818	0.695721	0.76505	0.82848	0.905195	1.01401	1.16131	1.34844	1.74056	33.1047
0.0348941	0.0668282	0.0986959	0.129972	0.162929	0.192804	0.217532	0.245281	0.265203	0.297905	0.336852	0.362264	0.399086	0.441487	0.482384	0.523584	0.569038	0.628053	0.696058	0.765721	0.828532	0.905693	1.0145	1.16188	1.35048	1.75621	33.5695
0.0350122	0.0668526	0.0987588	0.129996	0.162941	0.192976	0.217841	0.245374	0.265294	0.298592	0.337206	0.362874	0.399606	0.44156	0.483221	0.525172	0.569311	0.628897	0.696218	0.765994	0.829391	0.906178	1.01467	1.16235	1.35324	1.76036	33.8191
0.035064	0.0669787	0.0989084	0.130158	0.163207	0.193057	0.218015	0.245592	0.265702	0.298643	0.33779	0.363055	0.400666	0.441562	0.484074	0.525761	0.569426	0.6302	0.696609	0.766255	0.829645	0.909476	1.01467	1.16247	1.3536	1.77451	33.83
0.0350684	0.0670356	0.0989163	0.13065	0.163246	0.193271	0.218538	0.245665	0.266205	0.29875	0.337891	0.363073	0.402268	0.441985	0.484125	0.526013	0.569977	0.630511	0.697238	0.766517	0.830001	0.910547	1.01467	1.1628	1.35468	1.77461	34.4928
0.0351191	0.0671367	0.098964	0.130652	0.163266	0.193474	0.218552	0.245748	0.266676	0.298863	0.338286	0.36369	0.402537	0.442388	0.484233	0.52619	0.570328	0.632003	0.697934	0.7669	0.832518	0.910755	1.01467	1.16368	1.35569	1.77471	34.5489
0.0351382	0.0672409	0.0989799	0.130757	0.163287	0.193602	0.219471	0.245769	0.266777	0.299091	0.338385	0.363697	0.40256	0.442541	0.48541	0.526946	0.570397	0.632126	0.698699	0.767556	0.832681	0.911821	1.01476	1.16462	1.35571	1.77661	34.6734
0.0351984	0.0674792	0.0990071	0.130842	0.16349	0.193605	0.220317	0.245886	0.266813	0.299309	0.338567	0.363705	0.403032	0.442956	0.485956	0.527772	0.571767	0.632476	0.698868	0.768343	0.833473	0.911869	1.01503	1.16567	1.35762	1.77879	35.1361
0.0352114	0.0675804	0.0990387	0.130857	0.163633	0.193709	0.220805	0.246094	0.267386	0.299856	0.338953	0.36387	0.40439	0.443649	0.486041	0.528997	0.572334	0.632526	0.699405	0.768414	0.83443	0.913282	1.01524	1.16704	1.35857	1.78259	35.1956
0.035243	0.0675975	0.0990677	0.131051	0.163716	0.193725	0.220974	0.246094	0.267542	0.300398	0.339731	0.364049	0.404629	0.443908	0.486537	0.529445	0.572474	0.632837	0.699414	0.768932	0.834977	0.914646	1.01619	1.16819	1.3607	1.796	35.538
0.0352735	0.0676245	0.099101	0.131222	0.16376	0.193951	0.221132	0.246094	0.267576	0.300591	0.339754	0.364275	0.404676	0.444142	0.486775	0.530694	0.572863	0.633009	0.699866	0.768961	0.835028	0.915194	1.01632	1.16883	1.3608	1.797	36.0906
0.0352922	0.0676898	0.0992054	0.131658	0.163905	0.194181	0.221228	0.246094	0.268229	0.300651	0.340377	0.364331	0.405038	0.4442	0.486829	0.530954	0.573571	0.634457	0.700843	0.769064	0.835422	0.915634	1.01637	1.16955	1.36219	1.8051	37.1479
0.0353314	0.0677764	0.0994536	0.131675	0.163918	0.194228	0.221501	0.246094	0.26826	0.30073	0.340414	0.364694	0.405082	0.444383	0.487551	0.531076	0.574535	0.634609	0.701583	0.769199	0.835479	0.915647	1.01924	1.17056	1.36304	1.80513	39.7449
0.0353453	0.0677975	0.0996073	0.131723	0.164014	0.194333	0.221908	0.246094	0.268316	0.300964	0.340436	0.365534	0.406362	0.444399	0.487674	0.531361	0.57485	0.635208	0.701688	0.769691	0.83682	0.915729	1.01952	1.17061	1.36492	1.81683	40.5683
0.0354089	0.0678747	0.0996352	0.131734	0.164015	0.194499	0.221985	0.246094	0.268365	0.301053	0.340467	0.366235	0.406745	0.4446	0.488242	0.533269	0.574869	0.636216	0.701814	0.770029	0.836866	0.91614	1.01973	1.17166	1.36588	1.84113	40.7431
0.0354539	0.06788	0.0997601	0.131889	0.164103	0.194584	0.222001	0.246094	0.268509	0.301153	0.340796	0.366275	0.406829	0.444821	0.488717	0.534317	0.576071	0.637605	0.703175	0.770559	0.837973	0.916354	1.02028	1.17334	1.36949	1.84298	42.153
0.0354589	0.0679113	0.0998085	0.132007	0.16438	0.194767	0.222065	0.246094	0.269019	0.301488	0.340811	0.366392	0.407062	0.445044	0.488996	0.534387	0.576725	0.638114	0.705147	0.770583	0.838089	0.91642	1.02123	1.1739	1.37222	1.85283	43.8838
0.0354921	0.0679277	0.0999202	0.13213	0.164743	0.195048	0.22236	0.246094	0.269225	0.301728	0.341469	0.367345	0.407069	0.445314	0.489263	0.535428	0.576744	0.638762	0.705223	0.771064	0.838529	0.916424	1.02272	1.17445	1.37375	1.85996	44.5223
0.0355816	0.0680157	0.100046	0.132192	0.165077	0.195222	0.222748	0.246094	0.269315	0.301792	0.341509	0.367345	0.407714	0.445609	0.48965	0.535541	0.577134	0.639673	0.705424	0.772127	0.839595	0.918128	1.02272	1.17451	1.37812	1.86013	44.5338
0.0357169	0.0680183	0.100064	0.132372	0.165085	0.195293	0.222756	0.246094	0.269402	0.301886	0.341757	0.36822	0.40798	0.447438	0.490027	0.535681	0.57722	0.642294	0.70604	0.772982	0.840414	0.919087	1.02443	1.17696	1.38034	1.86578	45.2976
0.0357726	0.0680943	0.100294	0.132439	0.16515	0.195314	0.222774	0.246094	0.269616	0.301984	0.341841	0.368542	0.40801	0.447728	0.490443	0.535776	0.577479	0.642858	0.706253	0.774102	0.840919	0.919401	1.02451	1.18054	1.38262	1.87419	45.8836
0.0357779	0.0681801	0.100318	0.132538	0.165452	0.195326	0.223349	0.246094	0.269758	0.302177	0.341932	0.369432	0.408018	0.448806	0.491097	0.535966	0.578047	0.643641	0.70658	0.774522	0.841162	0.919793	1.0267	1.18083	1.38311	1.88299	46.4245
0.0357819	0.0681823	0.100365	0.132548	0.165599	0.195343	0.224117	0.246094	0.269921	0.302502	0.342224	0.369576	0.40828	0.448906	0.491126	0.536198	0.579398	0.643717	0.708033	0.777203	0.841251	0.920025	1.0269	1.18087	1.38553	1.88549	47.029
0.0358255	0.06819	0.100374	0.132579	0.165611	0.19535	0.224219	0.246094	0.270368	0.302639	0.342229	0.370094	0.408875	0.449214	0.491175	0.536232	0.579726	0.643995	0.708629	0.77731	0.841412	0.921109	1.02767	1.18106	1.38994	1.88707	47.4036
0.0358607	0.0682039	0.10038	0.132641	0.165633	0.195395	0.224284	0.246094	0.270409	0.302821	0.342256	0.370602	0.408892	0.449784	0.491191	0.536832	0.579914	0.644006	0.709037	0.778217	0.84171	0.921112	1.0281	1.1818	1.3903	1.891	47.9587
0.036021	0.0682191	0.100381	0.132661	0.165697	0.195474	0.224305	0.246094	0.270704	0.303002	0.342291	0.370622	0.408928	0.450381	0.491767	0.537109	0.579943	0.644179	0.711785	0.778217	0.842187	0.921121	1.02974	1.18252	1.39212	1.90312	48.1874
0.0360662	0.0682373	0.100385	0.132754	0.165788	0.195525	0.224307	0.246094	0.27082	0.303216	0.342716	0.371375	0.40896	0.450386	0.49192	0.537282	0.580774	0.645077	0.713103	0.778217	0.842615	0.921122	1.03096	1.18432	1.39212	1.91577	48.9405
0.0360781	0.0683004	0.100528	0.132831	0.166105	0.195701	0.224355	0.246094	0.270895	0.303239	0.342771	0.371584	0.409845	0.450604	0.49202	0.537332	0.581781	0.645368	0.713504	0.778217	0.843044	0.921138	1.03227	1.18546	1.39283	1.91671	49.1299
0.03611	0.0683167	0.100674	0.132864	0.166145	0.195707	0.224571	0.246094	0.270942	0.303772	0.342869	0.371589	0.40996	0.451101	0.492188	0.537352	0.583361	0.645649	0.713887	0.778456	0.843279	0.92166	1.03251	1.18548	1.39437	1.9204	49.3755
0.036176	0.0683603	0.100691	0.132868	0.166428	0.196092	0.22473	0.246094	0.271088	0.303803	0.343278	0.37161	0.410239	0.451227	0.492188	0.537499	0.583913	0.645878	0.714205	0.778984	0.843325	0.923446	1.03346	1.18549	1.39456	1.92205	50.0135
0.0362136	0.0686073	0.100716	0.132964	0.166534	0.196193	0.224834	0.246094	0.271426	0.304859	0.344094	0.371968	0.410881	0.451254	0.492188	0.537834	0.584396	0.64598	0.714325	0.779213	0.844593	0.923918	1.03381	1.18645	1.39912	1.92205	50.4006
0.036232	0.0690403	0.100728	0.132991	0.16673	0.196548	0.225211	0.246094	0.271463	0.304961	0.344239	0.371978	0.410886	0.451479	0.492188	0.538137	0.584654	0.646278	0.714374	0.779404	0.844688	0.924248	1.03452	1.18923	1.39971	1.95647	50.8702
0.0362596	0.0690654	0.100741	0.132999	0.167244	0.196622	0.225376	0.246094	0.271505	0.305333	0.34436	0.372033	0.411103	0.451749	0.492188	0.538534	0.585496	0.646725	0.714587	0.780548	0.846055	0.925296	1.03577	1.19099	1.4005	1.95753	51.2558
0.036302	0.0690873	0.100812	0.133167	0.167743	0.196665	0.225786	0.246094	0.271661	0.305371	0.344445	0.372557	0.411352	0.452061	0.492188	0.538836	0.585904	0.647462	0.714698	0.780668	0.846267	0.925444	1.03624	1.19401	1.40154	1.96279	51.8371
0.0368143	0.0691909	0.101001	0.133227	0.167765	0.196683	0.225919	0.246094	0.271664	0.305582	0.344732	0.372616	0.411619	0.452376	0.492188	0.539277	0.586428	0.647465	0.714856	0.781255	0.846989	0.925987	1.03673	1.19431	1.40494	1.98407	52.352
0.0368295	0.0693705	0.101064	0.133243	0.167968	0.19674	0.225922	0.246094	0.27169	0.30567	0.344887	0.372792	0.412282	0.452589	0.492188	0.539296	0.586718	0.647574	0.715823	0.783093	0.848103	0.926387	1.03898	1.19455	1.40561	1.98407	52.8036
0.0368459	0.069608	0.101136	0.13344	0.168143	0.196747	0.225945	0.246094	0.271872	0.305985	0.345083	0.373818	0.412299	0.452608	0.492188	0.539421	0.586817	0.647788	0.715836	0.784068	0.848264	0.927117	1.04006	1.19458	1.40573	2.00471	53.244
0.036926	0.0697359	0.101174	0.133507	0.168233	0.197357	0.225963	0.246094	0.272055	0.306314	0.345404	0.374131	0.412897	0.452692	0.492188	0.540207	0.587888	0.648742	0.717218	0.784393	0.848577	0.92726	1.04208	1.195	1.40714	2.02763	53.4881
0.0370306	0.0697359	0.101277	0.133702	0.168272	0.197512	0.22607	0.246094	0.272079	0.306335	0.34604	0.374239	0.41295	0.452929	0.492188	0.540318	0.58854	0.64883	0.717329	0.786835	0.848775	0.929152	1.04302	1.19668	1.4074	2.02934	55.2184
0.0370371	0.0698513	0.101293	0.133851	0.168322	0.197581	0.226425	0.246094	0.27249	0.306712	0.346096	0.374241	0.413136	0.453462	0.492188	0.541125	0.589923	0.648918	0.717727	0.787555	0.848964	0.929961	1.04409	1.19669	1.40933	2.02934	55.6227
0.0370582	0.0699463	0.101387	0.133851	0.16836	0.197593	0.226576	0.246094	0.272938	0.306972	0.346237	0.374251	0.413326	0.45379	0.492188	0.541315	0.590179	0.649183	0.718199	0.788933	0.849068	0.931636	1.04505	1.19827	1.4124	2.04135	57.836
0.0371498	0.0699479	0.101506	0.134536	0.168526	0.197861	0.226599	0.246094	0.273015	0.307013	0.346391	0.374603	0.413516	0.453814	0.492188	0.541439	0.590353	0.649713	0.718321	0.789508	0.849127	0.931699	1.04849	1.19945	1.41432	2.04502	59.4294
0.0372281	0.0699638	0.101526	0.134887	0.168724	0.198106	0.227026	0.246296	0.273173	0.307484	0.346644	0.374646	0.414188	0.453838	0.492286	0.542171	0.590828	0.6498	0.718612	0.789613	0.849518	0.931788	1.04913	1.20067	1.41489	2.05483	60.1638
0.0373643	0.0700648	0.101577	0.134994	0.168758	0.198304	0.227167	0.246459	0.273385	0.307767	0.346938	0.375173	0.414371	0.453869	0.492421	0.542778	0.591195	0.650287	0.718904	0.790487	0.84984	0.93184	1.0495	1.2031	1.4179	2.06207	62.417
0.037421	0.0701581	0.101631	0.135041	0.168807	0.198356	0.227239	0.246546	0.273591	0.308116	0.346938	0.375193	0.414458	0.454241	0.492952	0.543301	0.591315	0.650568	0.719095	0.791582	0.849963	0.932321	1.05071	1.20553	1.42093	2.08276	62.6008
0.0375873	0.070284	0.101758	0.135521	0.168915	0.198424	0.227272	0.246548	0.274426	0.308253	0.346978	0.375937	0.414522	0.454355	0.493185	0.543729	0.591335	0.651133	0.719143	0.791863	0.850505	0.933077	1.05212	1.20746	1.42629	2.08533	62.7134
0.037588	0.070299	0.101867	0.135591	0.169391	0.198682	0.227332	0.246849	0.274634	0.308543	0.347183	0.376061	0.414534	0.454476	0.493328	0.543744	0.592478	0.651465	0.71937	0.792604	0.851938	0.934096	1.05224	1.21165	1.43047	2.11698	62.7953
0.0376676	0.0703222	0.101904	0.135609	0.169574	0.198758	0.2275	0.246916	0.274687	0.308682	0.347258	0.376519	0.414583	0.454755	0.493792	0.543826	0.592798	0.652408	0.720016	0.792874	0.852659	0.93473	1.05228	1.21185	1.43432	2.14171	62.8159
0.0376921	0.070351	0.101952	0.135683	0.169776	0.198905	0.227634	0.247088	0.274944	0.308725	0.347354	0.376768	0.414758	0.454917	0.493897	0.543866	0.592834	0.65268	0.720878	0.793328	0.853049	0.940037	1.05237	1.21649	1.43496	2.15161	62.9488
0.0377243	0.0704228	0.102131	0.135687	0.169807	0.199116	0.228174	0.247145	0.275052	0.308762	0.347395	0.37711	0.4156	0.455252	0.49402	0.544121	0.593449	0.653022	0.722545	0.793449	0.855959	0.940521	1.05442	1.21907	1.43496	2.15742	63.0031
0.0378445	0.0705867	0.102338	0.135814	0.170119	0.199259	0.228318	0.247364	0.275351	0.308809	0.347555	0.377114	0.416782	0.456337	0.495526	0.544566	0.593467	0.653634	0.723675	0.795748	0.856161	0.940933	1.05589	1.21946	1.43496	2.19711	63.4052
0.0378819	0.0705913	0.10234	0.135864	0.170409	0.19926	0.228583	0.24743	0.27577	0.30894	0.347948	0.377527	0.41721	0.456587	0.495898	0.544975	0.593698	0.654672	0.72375	0.795836	0.856574	0.942074	1.05592	1.22007	1.43617	2.21484	64.0866
0.0379426	0.0707041	0.102417	0.135916	0.170486	0.199406	0.228592	0.247432	0.276356	0.30926	0.348029	0.378218	0.417339	0.456705	0.495978	0.545093	0.594884	0.654839	0.724231	0.797122	0.85736	0.94331	1.05615	1.22381	1.45236	2.21484	65.4269
0.0380535	0.0707195	0.102502	0.136016	0.170499	0.199622	0.228639	0.247721	0.276371	0.30927	0.348029	0.378551	0.417809	0.45714	0.496084	0.546384	0.595013	0.655424	0.724496	0.797292	0.857748	0.944938	1.05666	1.22465	1.45258	2.21862	65.9007
0.038079	0.0707947	0.102614	0.136197	0.170683	0.199656	0.228882	0.247727	0.276866	0.309325	0.348029	0.378737	0.418224	0.457462	0.497258	0.546888	0.595058	0.655476	0.72537	0.797757	0.85833	0.949325	1.0583	1.22555	1.45377	2.22847	66.0796
0.0381963	0.0708188	0.102643	0.136224	0.170709	0.199693	0.229232	0.247842	0.277175	0.309953	0.348029	0.379628	0.418377	0.457467	0.497455	0.54696	0.595882	0.656587	0.726469	0.797778	0.858499	0.954543	1.06106	1.23047	1.45378	2.22847	75.1318
0.0382565	0.0708525	0.102649	0.136437	0.170725	0.199882	0.229255	0.248047	0.277269	0.309999	0.348029	0.379681	0.418579	0.457753	0.497819	0.547466	0.595913	0.657865	0.726871	0.799051	0.85863	0.956011	1.06193	1.23047	1.45385	2.22847	78.4955
0.038391	0.0708538	0.102662	0.136575	0.170772	0.199971	0.229354	0.248047	0.277712	0.310424	0.348029	0.379973	0.418604	0.457873	0.498141	0.548427	0.596349	0.658478	0.726995	0.799099	0.859016	0.958306	1.06348	1.23047	1.45648	2.2554	80.9253
0.0385332	0.0708913	0.102681	0.136871	0.170979	0.200032	0.229439	0.248047	0.277863	0.310456	0.348029	0.380172	0.418766	0.457896	0.498375	0.548605	0.596784	0.658745	0.72745	0.799348	0.859732	0.958802	1.06457	1.23047	1.46884	2.26887	83.1631
0.0385731	0.0709597	0.10294	0.136919	0.171056	0.200648	0.229705	0.248047	0.278162	0.310522	0.348029	0.380249	0.418955	0.458167	0.498376	0.54881	0.596836	0.659159	0.728085	0.799809	0.860278	0.962946	1.06542	1.23047	1.47292	2.27407	96.1917
0.0385928	0.0710007	0.1032	0.136927	0.171264	0.200831	0.229906	0.248047	0.278245	0.310626	0.348029	0.380338	0.419074	0.458292	0.498529	0.548908	0.596939	0.659405	0.728906	0.800188	0.860411	0.963729	1.06749	1.23047	1.47656	2.2837	98.2619
0.0386661	0.0710987	0.103415	0.137143	0.171282	0.200891	0.230326	0.248047	0.278368	0.310952	0.348029	0.380478	0.419075	0.458313	0.498691	0.549185	0.597281	0.660193	0.729875	0.801149	0.861201	0.964451	1.06959	1.23047	1.47656	2.29417	99.7387
0.0386925	0.071168	0.10376	0.137204	0.171351	0.200938	0.230328	0.248047	0.278551	0.311263	0.348029	0.380778	0.419105	0.458372	0.498812	0.550282	0.597483	0.661087	0.729885	0.801183	0.861777	0.964538	1.0698	1.23047	1.47817	2.31165	100.325
0.038708	0.0711876	0.10386	0.137264	0.171374	0.201078	0.230659	0.248047	0.280057	0.311324	0.348029	0.381419	0.419266	0.458964	0.499251	0.550282	0.597604	0.662442	0.731739	0.801251	0.86297	0.965533	1.07131	1.23047	1.48207	2.3339
0.0387113	0.0712264	0.104195	0.137276	0.171384	0.201714	0.230704	0.248047	0.280176	0.31182	0.348029	0.381795	0.419421	0.459206	0.499651	0.550282	0.598327	0.663144	0.73376	0.801596	0.863753	0.966156	1.07168	1.23047	1.4832	2.38626
0.0387525	0.0712451	0.10428	0.137306	0.171696	0.202052	0.231186	0.248047	0.280305	0.312069	0.348029	0.381797	0.420707	0.459344	0.499837	0.550282	0.598502	0.663197	0.733996	0.801669	0.863795	0.967325	1.07275	1.23047	1.48828	2.43045
0.0387535	0.0712458	0.104285	0.137349	0.171702	0.202202	0.231466	0.248047	0.280558	0.312108	0.348029	0.381846	0.420948	0.459566	0.500124	0.550282	0.599469	0.663367	0.7346	0.80214	0.864735	0.96737	1.0729	1.23124	1.48828	2.46094
0.0388739	0.0716556	0.104438	0.13741	0.171867	0.202309	0.231483	0.248047	0.280804	0.312465	0.348029	0.382012	0.420949	0.459608	0.50024	0.550282	0.599598	0.664348	0.734638	0.802881	0.865253	0.968879	1.07425	1.23197	1.49201	2.46345
0.0388986	0.0718155	0.104526	0.137539	0.172139	0.202362	0.231643	0.248047	0.280833	0.313909	0.348029	0.382135	0.421345	0.459856	0.50055	0.550282	0.599851	0.664589	0.73494	0.80358	0.865543	0.969319	1.0753	1.23208	1.49325	2.47321
0.0389108	0.0718498	0.104567	0.137568	0.172145	0.202431	0.231781	0.248047	0.280879	0.314435	0.348029	0.383372	0.421479	0.460963	0.501223	0.550282	0.60015	0.666383	0.735426	0.803991	0.865789	0.96936	1.07698	1.23678	1.49435	2.47788
0.0389108	0.0721987	0.104655	0.137641	0.172207	0.202537	0.231831	0.248047	0.280946	0.314601	0.348029	0.383734	0.421668	0.461193	0.501311	0.550282	0.600984	0.6664	0.735443	0.804243	0.866246	0.971356	1.07702	1.23722	1.49914	2.48047
0.0389202	0.0722904	0.104771	0.137761	0.17226	0.202665	0.232346	0.248047	0.28117	0.314849	0.348029	0.38411	0.422047	0.461279	0.502164	0.550282	0.601447	0.66702	0.735503	0.804403	0.867985	0.97279	1.07885	1.23999	1.50076	2.52959
0.0389396	0.0723165	0.104866	0.137858	0.172305	0.203127	0.232419	0.248047	0.281333	0.314988	0.348456	0.384131	0.422157	0.46134	0.503529	0.550282	0.602187	0.667266	0.736762	0.804618	0.869481	0.973362	1.08057	1.24239	1.50619	2.54199
0.038942	0.072337	0.105048	0.137877	0.172331	0.203212	0.23244	0.248135	0.281388	0.315368	0.348648	0.384263	0.422465	0.462027	0.503532	0.550282	0.602323	0.667488	0.738281	0.805413	0.869821	0.973914	1.08077	1.24247	1.5086	2.56945
0.0389983	0.0724797	0.105116	0.137901	0.172343	0.203428	0.232777	0.248664	0.281551	0.315411	0.348688	0.38446	0.422577	0.462339	0.503687	0.550282	0.60247	0.667976	0.738281	0.805912	0.870574	0.97422	1.08668	1.24247	1.50881	2.57126
0.0391807	0.0724987	0.105136	0.138019	0.172584	0.203508	0.233026	0.248854	0.281699	0.315476	0.348752	0.385176	0.422992	0.462368	0.503721	0.550282	0.602664	0.668635	0.738281	0.805938	0.871451	0.974851	1.08835	1.24302	1.51022	2.58969
0.0392521	0.0726003	0.105234	0.138178	0.173073	0.203679	0.233129	0.248944	0.281728	0.315788	0.348849	0.386369	0.423002	0.462579	0.503941	0.550282	0.60267	0.668858	0.738281	0.806019	0.871864	0.977505	1.08854	1.24346	1.51194	2.58969
0.039336	0.0726128	0.105274	0.13821	0.173258	0.203738	0.233433	0.249326	0.281931	0.316016	0.349048	0.387446	0.423335	0.462867	0.504281	0.550703	0.6028	0.669847	0.738281	0.807241	0.87213	0.977597	1.08893	1.24791	1.51232	2.63677
0.039438	0.0726994	0.105332	0.138215	0.17327	0.203782	0.233512	0.249549	0.282132	0.316023	0.349237	0.387575	0.424437	0.463781	0.504837	0.551727	0.603061	0.670121	0.739347	0.807381	0.872396	0.978018	1.08938	1.24917	1.51557	2.65051
0.0394674	0.0728846	0.105334	0.138251	0.173318	0.203874	0.233834	0.249745	0.282152	0.316304	0.34929	0.38764	0.425651	0.464187	0.504916	0.551969	0.603333	0.670874	0.739802	0.809063	0.873656	0.978059	1.08945	1.25181	1.51612	2.68529
0.0395466	0.0729369	0.105397	0.138448	0.17337	0.203974	0.23416	0.249974	0.282225	0.316464	0.349337	0.387651	0.425697	0.464409	0.504918	0.552349	0.60354	0.670933	0.740132	0.809347	0.874101	0.98019	1.0896	1.25484	1.52842	2.71819
0.0395892	0.0730915	0.105479	0.138457	0.173379	0.20398	0.234453	0.250236	0.282562	0.316478	0.349593	0.388653	0.42594	0.464482	0.504929	0.552484	0.603932	0.671057	0.740947	0.810386	0.874178	0.982477	1.09065	1.25484	1.52985	2.71819
0.0396791	0.0733997	0.105579	0.138564	0.173386	0.204303	0.234542	0.25038	0.282614	0.316484	0.350688	0.3891	0.426799	0.46456	0.505114	0.552599	0.605023	0.671075	0.741937	0.811084	0.876107	0.982628	1.09231	1.25484	1.53045	2.77325
0.0396854	0.0734322	0.105619	0.138568	0.173458	0.204367	0.234567	0.250422	0.282678	0.316649	0.350791	0.389322	0.42743	0.46464	0.505296	0.552644	0.605725	0.671549	0.742445	0.811426	0.87701	0.982979	1.09392	1.25484	1.5308	3.29376
0.0397815	0.0736989	0.105708	0.138656	0.173527	0.20441	0.234629	0.250499	0.282863	0.316943	0.350791	0.389617	0.42749	0.464705	0.505508	0.553879	0.605878	0.671564	0.742502	0.811697	0.877755	0.983366	1.09411	1.25484	1.53554	3.40305
0.0398037	0.0737471	0.105792	0.138667	0.173647	0.204649	0.234756	0.250562	0.282892	0.317228	0.350791	0.389698	0.427721	0.464859	0.50581	0.553998	0.606518	0.671756	0.743525	0.811905	0.878897	0.983994	1.0947	1.25832	1.54502	3.52501
0.0398115	0.0738906	0.105992	0.138778	0.173737	0.204654	0.23515	0.250761	0.283201	0.317326	0.350791	0.389877	0.427742	0.465269	0.50622	0.554033	0.606537	0.672344	0.744141	0.812601	0.879418	0.984375	1.09509	1.25886	1.55124	3.63177
0.0398128	0.0739017	0.106029	0.138938	0.173971	0.20485	0.235346	0.250999	0.283215	0.317609	0.350791	0.390339	0.428131	0.465819	0.506404	0.554588	0.606706	0.672587	0.744141	0.812997	0.879912	0.984375	1.09523	1.26135	1.55643	3.67082
0.0398423	0.0740562	0.106238	0.139049	0.174185	0.204881	0.235438	0.251005	0.283375	0.318249	0.350791	0.390812	0.428523	0.4662	0.506872	0.55465	0.606845	0.673218	0.744141	0.81305	0.880166	0.984375	1.09999	1.26323	1.55803	3.73635
0.0398719	0.0741245	0.106393	0.139064	0.17423	0.204984	0.235653	0.25106	0.283539	0.318348	0.350916	0.390957	0.428705	0.466288	0.50698	0.55465	0.606982	0.674016	0.744457	0.813221	0.8817	0.984715	1.10056	1.27002	1.58189	3.83756
0.039944	0.0741344	0.106598	0.139133	0.174315	0.20514	0.23573	0.251094	0.283945	0.318371	0.351071	0.39111	0.428845	0.466525	0.507027	0.55465	0.607778	0.674114	0.744591	0.814796	0.881753	0.985083	1.10056	1.27141	1.58827	4.03791
0.0400598	0.0741826	0.106624	0.139137	0.174596	0.205154	0.236094	0.251675	0.283979	0.318779	0.351102	0.391129	0.429531	0.46682	0.507251	0.55465	0.608438	0.674646	0.745421	0.815945	0.881918	0.985777	1.10264	1.27405	1.58827	4.2168
0.0400923	0.0742395	0.106809	0.139542	0.174698	0.205377	0.236245	0.251834	0.284051	0.318866	0.351354	0.391433	0.429762	0.467092	0.507309	0.55465	0.608658	0.674968	0.745846	0.816407	0.882594	0.986596	1.10288	1.28177	1.59888	4.23324
0.0400972	0.0742697	0.106852	0.139795	0.174717	0.205529	0.236289	0.25184	0.28434	0.319449	0.351451	0.391531	0.429867	0.468095	0.507801	0.555306	0.608859	0.675606	0.745986	0.816515	0.882758	0.987711	1.10322	1.28217	1.60043	4.35917
0.0401133	0.0744629	0.10687	0.139963	0.174797	0.205696	0.236425	0.251995	0.284482	0.319449	0.351581	0.391654	0.430027	0.468295	0.508324	0.555539	0.608919	0.676016	0.746035	0.817419	0.882906	0.990027	1.10644	1.28273	1.60212	4.66859
0.0402017	0.0744662	0.106929	0.140143	0.174866	0.205961	0.236581	0.25243	0.284694	0.319609	0.351618	0.39167	0.430069	0.468446	0.508691	0.556021	0.610225	0.676593	0.74634	0.817614	0.883224	0.992329	1.10737	1.2834	1.60745	4.82872
0.0402045	0.0745678	0.106996	0.140175	0.174877	0.206032	0.236767	0.252566	0.284716	0.31991	0.352364	0.391774	0.430072	0.468452	0.508929	0.556503	0.610539	0.67692	0.746514	0.818136	0.884089	0.992794	1.11226	1.28403	1.60878	4.92879
0.0402215	0.0746541	0.106997	0.140216	0.175057	0.206113	0.237058	0.252989	0.285047	0.320373	0.352368	0.391809	0.430154	0.46878	0.508978	0.558112	0.610594	0.677039	0.747888	0.818263	0.884916	0.993484	1.11267	1.28597	1.628	4.95936
0.0402378	0.0746752	0.107019	0.140246	0.175065	0.206197	0.237064	0.253004	0.28525	0.320574	0.352681	0.391828	0.430567	0.468932	0.509179	0.55824	0.611741	0.677411	0.748245	0.818954	0.885199	0.996325	1.11276	1.28684	1.62843	4.98908
0.0402455	0.074689	0.107203	0.140393	0.175094	0.206515	0.237205	0.253695	0.285307	0.320661	0.352704	0.39207	0.43103	0.469427	0.509381	0.558567	0.611873	0.677686	0.748525	0.819187	0.887304	0.999335	1.11317	1.28744	1.63078	5.0101
0.0403551	0.0749533	0.10723	0.140523	0.175221	0.206608	0.237566	0.253858	0.285765	0.320935	0.353224	0.392359	0.431721	0.469541	0.509485	0.559038	0.612245	0.677774	0.748819	0.819395	0.887304	0.999335	1.11428	1.28882	1.63304	5.01852
0.040445	0.0749746	0.107325	0.140809	0.175224	0.206845	0.237935	0.253956	0.285783	0.321054	0.353248	0.392487	0.431828	0.470403	0.509711	0.559283	0.612734	0.678883	0.749097	0.819594	0.887304	1.00023	1.11436	1.28896	1.63309	5.08641
0.040471	0.075022	0.107336	0.1409	0.175387	0.207126	0.238063	0.254038	0.28606	0.321367	0.353609	0.392624	0.432223	0.470698	0.510025	0.559492	0.61295	0.679211	0.750544	0.819786	0.887341	1.00229	1.11568	1.28905	1.63796	5.11175
0.0405481	0.075124	0.107448	0.141021	0.175411	0.207568	0.238204	0.254116	0.286235	0.321514	0.354837	0.392673	0.432973	0.470849	0.510102	0.559631	0.613413	0.679767	0.750692	0.81996	0.888082	1.00514	1.1166	1.2893	1.6384	5.21793
0.0405637	0.0751376	0.107473	0.141135	0.175581	0.207781	0.23821	0.25439	0.286291	0.322483	0.354959	0.392772	0.433882	0.471093	0.510324	0.55999	0.61387	0.680035	0.750949	0.820202	0.888161	1.00601	1.11889	1.28952	1.64392	6.21064
0.0405756	0.0753007	0.107604	0.141295	0.176177	0.207986	0.238552	0.25493	0.286301	0.322597	0.355071	0.392977	0.433903	0.471641	0.510821	0.560032	0.615304	0.680828	0.751196	0.82084	0.889578	1.00607	1.11998	1.29208	1.64787	6.93715
0.0406004	0.0754208	0.107736	0.141383	0.176309	0.208037	0.238741	0.255637	0.286361	0.322708	0.355375	0.393329	0.433924	0.47183	0.511007	0.560085	0.616122	0.681245	0.751413	0.821105	0.890434	1.00635	1.12228	1.29434	1.64822	7.44554
0.0406206	0.0756369	0.10784	0.141504	0.176448	0.20804	0.239377	0.255985	0.286683	0.322925	0.355836	0.393451	0.433988	0.472223	0.51152	0.560212	0.616437	0.681352	0.751989	0.821272	0.892119	1.00672	1.12408	1.29456	1.65085	8.22517
0.0406658	0.075647	0.107954	0.141923	0.176536	0.20808	0.239452	0.256238	0.287078	0.322956	0.356308	0.393546	0.434305	0.472675	0.512496	0.560341	0.616602	0.68221	0.753316	0.821749	0.892645	1.0073	1.1263	1.29965	1.65086	9.02125
0.040695	0.0758003	0.107954	0.142413	0.176565	0.208295	0.239559	0.256523	0.287206	0.323018	0.356462	0.393641	0.434838	0.473137	0.514029	0.560394	0.616879	0.682482	0.753377	0.821965	0.894001	1.00836	1.12748	1.30316	1.65112	9.48882
0.040831	0.0758317	0.108089	0.142728	0.17688	0.208763	0.23966	0.256524	0.287299	0.323166	0.357147	0.393803	0.435112	0.473171	0.514471	0.560605	0.6172	0.682641	0.753413	0.822764	0.894068	1.00901	1.12795	1.30481	1.65531	9.50641
0.0408354	0.0759753	0.10819	0.142799	0.176942	0.209003	0.239868	0.256816	0.287382	0.324117	0.357384	0.39427	0.435144	0.473447	0.514604	0.560615	0.617318	0.683788	0.753872	0.824238	0.894214	1.00972	1.13092	1.30532	1.6579	9.78764
0.04095	0.0760769	0.108254	0.142877	0.177242	0.209042	0.240021	0.257006	0.287555	0.324359	0.357466	0.394587	0.435342	0.473514	0.515243	0.560685	0.618025	0.684781	0.753906	0.824454	0.894312	1.0098	1.13169	1.30573	1.65814	10.5998
0.0409746	0.0761195	0.108338	0.142918	0.177594	0.209574	0.240226	0.258065	0.287769	0.324389	0.3576	0.394956	0.435694	0.47366	0.515337	0.561132	0.618283	0.685531	0.75394	0.82553	0.894346	1.0102	1.13203	1.30882	1.66193	11.0101
0.0410551	0.076121	0.108604	0.143084	0.177795	0.209733	0.240369	0.258413	0.28831	0.324512	0.357657	0.395124	0.436039	0.47377	0.51617	0.561498	0.618951	0.686144	0.754394	0.825729	0.894511	1.01205	1.13239	1.3099	1.67982	11.5415
0.0411094	0.076317	0.108631	0.143173	0.177872	0.209839	0.240377	0.25879	0.288826	0.324904	0.35791	0.395189	0.436168	0.474087	0.516244	0.561688	0.619631	0.686949	0.755171	0.825816	0.89659	1.01222	1.13268	1.31151	1.68163	11.8723
0.0411105	0.0765047	0.108635	0.143207	0.17794	0.209851	0.240415	0.259134	0.288836	0.324964	0.358238	0.395456	0.436391	0.474279	0.516556	0.56179	0.620247	0.687504	0.756152	0.826268	0.898102	1.01249	1.13298	1.31323	1.68303	12.769
0.0411223	0.0766227	0.108712	0.143324	0.178018	0.210131	0.240496	0.260224	0.289329	0.325148	0.359621	0.395793	0.436468	0.474475	0.516587	0.563285	0.62031	0.688699	0.757565	0.826536	0.898627	1.01272	1.1342	1.3133	1.68364	13.0209
0.0411238	0.0766378	0.108819	0.143342	0.178178	0.210451	0.240696	0.26033	0.290033	0.325193	0.360261	0.395941	0.43649	0.47487	0.516652	0.564109	0.620397	0.68898	0.757765	0.827821	0.898786	1.01466	1.137	1.31438	1.68832	13.1253
0.041128	0.0766752	0.108882	0.143388	0.17818	0.210505	0.240711	0.260495	0.290171	0.325303	0.360484	0.395949	0.436574	0.475006	0.51762	0.564111	0.620962	0.689412	0.757815	0.827889	0.899817	1.01467	1.1376	1.31509	1.69764	14.2338
0.0412506	0.0767364	0.108989	0.143403	0.178654	0.21051	0.240803	0.260497	0.290369	0.32536	0.360548	0.396014	0.436649	0.475961	0.518525	0.564174	0.621953	0.689459	0.757931	0.827975	0.900529	1.01467	1.13799	1.31661	1.70288	15.0033
0.0412978	0.0769209	0.109283	0.143423	0.178805	0.210538	0.241092	0.260549	0.290408	0.325811	0.36072	0.396133	0.437607	0.475981	0.518721	0.56433	0.622179	0.69029	0.759116	0.830433	0.901752	1.01467	1.13995	1.32043	1.71749	15.139
0.0412978	0.0769857	0.109338	0.143428	0.178957	0.210565	0.241318	0.260682	0.290932	0.32596	0.361222	0.397351	0.437886	0.476901	0.519242	0.56437	0.622797	0.690301	0.759526	0.83121	0.902556	1.01467	1.14263	1.32081	1.72266	15.392
0.041347	0.0770564	0.109367	0.143489	0.178967	0.210675	0.241355	0.261289	0.290935	0.326207	0.361406	0.397382	0.438788	0.47711	0.51949	0.564472	0.623138	0.690504	0.759981	0.831942	0.903381	1.01467	1.14354	1.32141	1.72266	15.6761
0.0414235	0.0771102	0.109384	0.143534	0.178993	0.210759	0.241489	0.261501	0.290987	0.326309	0.361527	0.398005	0.439183	0.477121	0.519688	0.565055	0.623768	0.691294	0.760202	0.832397	0.904097	1.01467	1.14433	1.32526	1.72827	16.1366
0.0414655	0.0772288	0.109455	0.143563	0.179034	0.210813	0.241503	0.261601	0.291118	0.326327	0.361551	0.398045	0.439257	0.477319	0.520203	0.565234	0.623948	0.691889	0.760365	0.834037	0.904202	1.01505	1.14467	1.32526	1.72857	16.3954
0.0414856	0.0772446	0.109511	0.143608	0.179356	0.211147	0.241544	0.261626	0.291345	0.326349	0.361612	0.398079	0.439276	0.477359	0.520432	0.565998	0.624658	0.692175	0.760388	0.835375	0.905065	1.01648	1.14774	1.33038	1.72996	16.4386
0.0415491	0.0772735	0.109521	0.143616	0.179382	0.211163	0.241818	0.261721	0.291443	0.32716	0.361983	0.39848	0.439325	0.477824	0.521559	0.566452	0.625808	0.692632	0.761597	0.835907	0.906008	1.01674	1.14982	1.33383	1.73086	16.8475
0.0415556	0.0772979	0.109539	0.143626	0.179849	0.211301	0.241911	0.261874	0.291786	0.327163	0.362543	0.399066	0.439346	0.477872	0.521647	0.566497	0.62645	0.693026	0.761818	0.83748	0.90614	1.01723	1.15003	1.33548	1.73187	17.0875
0.0415953	0.077391	0.109717	0.143691	0.18009	0.211501	0.242103	0.262371	0.292046	0.327342	0.362688	0.399177	0.439382	0.478007	0.522286	0.56659	0.627446	0.693658	0.762174	0.837609	0.906179	1.01729	1.15111	1.33769	1.73564	17.6967
0.0416608	0.0774575	0.109725	0.143757	0.180163	0.211531	0.242254	0.262475	0.292113	0.327356	0.36273	0.399287	0.439462	0.478106	0.522469	0.567039	0.629346	0.69386	0.762242	0.837642	0.908586	1.01742	1.15192	1.34359	1.73633	18.7352
0.0416684	0.0775493	0.110002	0.143839	0.18109	0.212415	0.242309	0.26266	0.292303	0.327667	0.363258	0.399522	0.440044	0.478541	0.522583	0.567717	0.629796	0.695932	0.76239	0.837927	0.909238	1.01765	1.15345	1.34401	1.73633	19.2024
0.0416724	0.0775637	0.110419	0.144093	0.181095	0.21283	0.242446	0.262735	0.292308	0.328126	0.363298	0.400018	0.440082	0.478821	0.522599	0.56805	0.630061	0.696058	0.763023	0.838245	0.909249	1.01794	1.15398	1.34653	1.74015	20.5903
0.0417116	0.0775637	0.11051	0.144168	0.181304	0.213091	0.242504	0.263521	0.292375	0.328935	0.363345	0.400614	0.4403	0.479273	0.522612	0.568152	0.630919	0.696058	0.763153	0.838573	0.909611	1.01823	1.15963	1.34863	1.74015	22.2395
0.041716	0.0776898	0.110514	0.144201	0.181496	0.213197	0.242514	0.264071	0.292446	0.32896	0.363403	0.401706	0.440538	0.479313	0.523093	0.568323	0.631258	0.696133	0.764715	0.838709	0.910547	1.01841	1.15979	1.34935	1.74015	24.424
0.0417881	0.0777061	0.110539	0.144477	0.182024	0.213306	0.242542	0.264309	0.292957	0.329188	0.363585	0.402031	0.440734	0.479521	0.523213	0.56841	0.63152	0.696195	0.765131	0.840073	0.911055	1.01914	1.15993	1.34997	1.74015	26.0169
0.0418251	0.0778241	0.110551	0.144491	0.182025	0.213508	0.242726	0.264545	0.293576	0.329447	0.363756	0.402084	0.440958	0.479532	0.523264	0.568748	0.631826	0.696219	0.76541	0.840243	0.912036	1.02013	1.16064	1.35063	1.74276	28.7091
0.041854	0.0780903	0.110623	0.144555	0.182102	0.213745	0.242753	0.264904	0.294119	0.329608	0.363911	0.402106	0.44102	0.479791	0.523512	0.569102	0.63199	0.696293	0.765949	0.840929	0.914669	1.02154	1.1614	1.35152	1.75659	29.3514
0.0418609	0.0781038	0.110792	0.144716	0.182161	0.214025	0.243024	0.265161	0.294237	0.329636	0.364103	0.402253	0.441159	0.48033	0.52377	0.569525	0.632099	0.696763	0.766397	0.841077	0.915235	1.02272	1.16302	1.3534	1.75802	29.8482
0.0419344	0.0781743	0.111185	0.144779	0.182411	0.214316	0.243146	0.265359	0.294629	0.33004	0.364308	0.402547	0.441208	0.480481	0.524199	0.569532	0.632278	0.697091	0.767316	0.841126	0.915261	1.02272	1.16348	1.35765	1.75879	29.9028
0.0419741	0.0783067	0.111212	0.144851	0.182433	0.214603	0.24326	0.265472	0.295008	0.330296	0.364878	0.402588	0.441846	0.480654	0.524455	0.569552	0.632825	0.697243	0.767396	0.8415	0.915564	1.02436	1.16442	1.35929	1.75964	29.9901
0.0420498	0.0784273	0.111391	0.144888	0.182581	0.214816	0.243313	0.265754	0.295056	0.330368	0.364978	0.402735	0.442025	0.481766	0.524946	0.569653	0.633332	0.6978	0.767398	0.841547	0.915715	1.02612	1.16449	1.36141	1.7621	30.4926
0.0421103	0.0784298	0.111637	0.144949	0.182589	0.214841	0.243504	0.265828	0.295272	0.331169	0.36528	0.402754	0.442449	0.481902	0.525159	0.569786	0.633447	0.698093	0.767682	0.841783	0.91624	1.02668	1.16537	1.36332	1.77461	30.8944
0.0421173	0.0784543	0.112069	0.145098	0.18261	0.214971	0.243887	0.26591	0.295483	0.331622	0.365355	0.403318	0.442661	0.482045	0.525407	0.571436	0.63376	0.698575	0.768688	0.842057	0.916283	1.02714	1.16567	1.36341	1.77461	31.0455
0.0421539	0.0785043	0.112315	0.145099	0.182898	0.215034	0.244258	0.26619	0.296202	0.331654	0.365472	0.403519	0.443	0.483884	0.525612	0.571686	0.633972	0.698632	0.769502	0.842282	0.916572	1.02763	1.16585	1.37042	1.78844	32.0864
0.0421794	0.0785415	0.112375	0.14511	0.182917	0.215097	0.244388	0.266262	0.296385	0.331797	0.365973	0.404245	0.443332	0.484367	0.526463	0.571848	0.634642	0.698954	0.769585	0.842613	0.916801	1.02776	1.16735	1.3729	1.79159	32.4087
0.0422309	0.0786309	0.112394	0.14533	0.18296	0.215119	0.244405	0.266297	0.296385	0.331907	0.366194	0.404248	0.443946	0.484588	0.526787	0.572298	0.634699	0.700181	0.770418	0.843114	0.917957	1.03008	1.17025	1.37385	1.7952	32.8116
0.0422768	0.0786435	0.11267	0.14538	0.182975	0.215154	0.244587	0.266329	0.296426	0.33191	0.366344	0.404388	0.443953	0.484679	0.526839	0.572592	0.635121	0.700328	0.771151	0.843507	0.918117	1.03058	1.17207	1.37419	1.79731	32.9173
0.0423176	0.078735	0.11267	0.14543	0.183084	0.21525	0.244606	0.26633	0.296706	0.332661	0.366614	0.404688	0.444052	0.484803	0.527418	0.572659	0.635235	0.701495	0.771205	0.844659	0.920288	1.031	1.17262	1.37494	1.7997	33.0882
0.0423717	0.0787566	0.112691	0.145551	0.183247	0.21527	0.244752	0.26665	0.296717	0.332815	0.366806	0.405032	0.444249	0.485039	0.527893	0.573121	0.635322	0.701583	0.772149	0.844688	0.920833	1.03111	1.1729	1.38039	1.81879	33.1771
0.0423798	0.0787985	0.112932	0.145762	0.183292	0.215454	0.244766	0.266715	0.297138	0.333124	0.367467	0.405289	0.445117	0.485089	0.528019	0.573446	0.635443	0.701723	0.772441	0.844814	0.921751	1.03234	1.17717	1.38145	1.83412	33.1799
0.0424269	0.0788768	0.112938	0.146235	0.183344	0.215649	0.244797	0.266998	0.2975	0.333163	0.36759	0.405323	0.445423	0.485182	0.52833	0.573451	0.636893	0.703859	0.772591	0.847019	0.922823	1.03776	1.17852	1.38178	1.84113	33.2547
0.0424461	0.0789255	0.113062	0.146298	0.183544	0.21573	0.244908	0.267034	0.29791	0.334119	0.367605	0.405347	0.445746	0.48525	0.528438	0.573507	0.637686	0.70417	0.774176	0.848238	0.923047	1.03854	1.17883	1.38267	1.85519	33.3154
0.0424612	0.078972	0.113364	0.146651	0.18359	0.2159	0.245052	0.26735	0.29821	0.334352	0.367713	0.405773	0.445916	0.485604	0.528579	0.574239	0.638925	0.704416	0.774257	0.848577	0.923597	1.0391	1.17975	1.38283	1.86288	33.6988
0.042477	0.0789743	0.113514	0.14681	0.183787	0.21613	0.245237	0.267848	0.298433	0.334689	0.367903	0.405843	0.446084	0.485898	0.529027	0.574519	0.639301	0.704417	0.775263	0.848966	0.923927	1.03911	1.1855	1.38417	1.88011	34.1234
0.0424879	0.0790973	0.113551	0.146864	0.184059	0.216353	0.245309	0.267935	0.298758	0.335285	0.36796	0.40637	0.448337	0.485931	0.529132	0.574863	0.640099	0.704804	0.775302	0.84916	0.924332	1.03996	1.1874	1.39406	1.89494	34.2915
0.0425281	0.0791521	0.113769	0.146889	0.184234	0.216535	0.245389	0.268652	0.298764	0.335344	0.368108	0.406809	0.44835	0.486118	0.52925	0.575484	0.640575	0.706162	0.776033	0.849206	0.926186	1.04022	1.18931	1.3941	1.90605	34.3579
0.0425438	0.0791521	0.114033	0.146889	0.184294	0.216587	0.245418	0.268859	0.298794	0.335818	0.368487	0.406849	0.448702	0.486256	0.529455	0.575657	0.641654	0.706211	0.777065	0.849518	0.926415	1.04102	1.19	1.39517	1.91671	34.3722
0.0426094	0.0792385	0.114053	0.146906	0.184362	0.216593	0.245681	0.269112	0.299055	0.336114	0.36935	0.406906	0.449089	0.486567	0.529468	0.575685	0.641774	0.706498	0.777569	0.849599	0.926427	1.04215	1.19186	1.39657	1.92077	35.2445
0.042652	0.0792477	0.114057	0.146988	0.184407	0.216605	0.245883	0.269158	0.299282	0.336494	0.369683	0.407301	0.450009	0.486692	0.529654	0.576019	0.642914	0.706633	0.778217	0.849967	0.926611	1.04302	1.1921	1.39936	1.92205	37.4889
0.0426974	0.0793099	0.114075	0.147154	0.184626	0.217334	0.245973	0.269425	0.299632	0.336663	0.369822	0.40739	0.450171	0.486961	0.530225	0.576509	0.643005	0.706871	0.778217	0.850062	0.927116	1.04302	1.19427	1.40119	1.93061	37.4998
0.0427872	0.079379	0.114207	0.147216	0.184628	0.217341	0.24603	0.269502	0.299916	0.337047	0.370014	0.40742	0.450398	0.488343	0.530485	0.577062	0.64362	0.706883	0.778217	0.850384	0.930286	1.04392	1.19451	1.40304	1.93393	38.1822
0.0428108	0.079482	0.114311	0.14731	0.1847	0.217781	0.246094	0.269648	0.300234	0.33765	0.370171	0.407886	0.450622	0.488839	0.53063	0.577752	0.643914	0.707274	0.778217	0.851108	0.931086	1.04409	1.19589	1.40519	1.93677	39.644
0.0428164	0.0795611	0.114317	0.147537	0.184848	0.217872	0.246094	0.269704	0.300353	0.33819	0.370266	0.407967	0.450636	0.488948	0.532101	0.578685	0.644239	0.707731	0.778217	0.851534	0.93311	1.04409	1.19765	1.40595	1.94071	41.0676
0.0428663	0.0796174	0.114414	0.147588	0.184995	0.218124	0.246094	0.269903	0.300413	0.338735	0.370377	0.408057	0.450877	0.489009	0.532104	0.578815	0.644419	0.708045	0.778217	0.851678	0.933969	1.04489	1.20756	1.40699	1.94333	41.6652
0.0428721	0.0797017	0.114423	0.147597	0.185167	0.218189	0.246094	0.270068	0.300515	0.338942	0.370555	0.40808	0.450991	0.489123	0.532931	0.578889	0.644672	0.708626	0.778217	0.852417	0.934019	1.04589	1.20772	1.40709	1.95445	41.9793
0.0428841	0.0797314	0.114534	0.147892	0.185274	0.218287	0.246094	0.270143	0.301196	0.339535	0.370752	0.408217	0.45108	0.489131	0.533281	0.579226	0.644706	0.708744	0.778217	0.852573	0.934718	1.04625	1.2104	1.41186	1.96163	43.336
0.0429703	0.0797774	0.114581	0.148154	0.185456	0.218299	0.246094	0.270216	0.301246	0.340028	0.370948	0.408632	0.45113	0.489638	0.533388	0.579612	0.644792	0.709116	0.778262	0.853851	0.935428	1.04637	1.21104	1.41208	1.96524	43.6502
0.0430392	0.0798427	0.114629	0.148273	0.18556	0.218383	0.246094	0.270556	0.301374	0.340234	0.370992	0.408778	0.451169	0.490536	0.533389	0.579726	0.645006	0.709791	0.778615	0.854816	0.935715	1.04699	1.21376	1.41291	1.96838	43.7257
0.0430548	0.0798563	0.114631	0.148276	0.185628	0.21855	0.246094	0.270632	0.301431	0.340272	0.371188	0.408863	0.451213	0.491465	0.533575	0.581379	0.645338	0.710722	0.778814	0.854881	0.937314	1.04834	1.21792	1.42376	1.96875	43.9785
0.0431235	0.0798654	0.114659	0.148303	0.185706	0.218658	0.246094	0.27071	0.301653	0.340319	0.371688	0.409151	0.451773	0.491919	0.53402	0.581448	0.646107	0.711368	0.77896	0.855038	0.938038	1.04955	1.21952	1.42408	1.96875	45.125
0.0431712	0.079877	0.114739	0.148311	0.185724	0.218839	0.246094	0.271789	0.301833	0.340384	0.371792	0.409155	0.45246	0.492188	0.534093	0.582987	0.646303	0.71304	0.782268	0.855188	0.938958	1.05078	1.22093	1.42457	1.99656	45.185
0.0432777	0.0798848	0.114767	0.14842	0.185839	0.218902	0.246094	0.271868	0.302231	0.340611	0.372118	0.409252	0.452465	0.492188	0.534245	0.584456	0.647021	0.713645	0.782348	0.855381	0.941823	1.05156	1.22108	1.42739	2.00859	45.6732
0.0432896	0.0799044	0.114837	0.148799	0.185894	0.219453	0.246094	0.271986	0.302298	0.341023	0.372424	0.409484	0.452508	0.492188	0.534265	0.584721	0.647074	0.713839	0.782503	0.856689	0.941831	1.05237	1.22714	1.42837	2.02934	45.8288
0.0433328	0.0799251	0.115285	0.148876	0.185983	0.219519	0.246094	0.272034	0.30239	0.341289	0.372516	0.409484	0.452562	0.492188	0.534654	0.585339	0.647075	0.713908	0.782528	0.857122	0.942299	1.05374	1.22781	1.43268	2.03906	46.4996
0.043416	0.0800646	0.115455	0.148913	0.186044	0.219523	0.246094	0.272302	0.303388	0.341548	0.372532	0.409648	0.452726	0.492188	0.534715	0.585376	0.647096	0.714134	0.782608	0.85736	0.942831	1.05396	1.22954	1.4341	2.05801	46.9462
0.0434226	0.080144	0.115465	0.149185	0.186107	0.219775	0.246094	0.272406	0.303448	0.341637	0.372583	0.409813	0.452732	0.492188	0.535211	0.585578	0.647148	0.714438	0.782839	0.857373	0.943364	1.05431	1.23047	1.43496	2.07496	46.9645
0.0434556	0.0801986	0.115565	0.149241	0.186564	0.219805	0.246094	0.272548	0.303617	0.341722	0.372785	0.409965	0.452885	0.492188	0.535321	0.585928	0.64787	0.714652	0.783124	0.857465	0.94358	1.0551	1.23047	1.43496	2.08199	47.0262
0.0434577	0.0802064	0.115978	0.149281	0.186644	0.220065	0.246094	0.272937	0.304084	0.342185	0.373179	0.410323	0.452942	0.492188	0.53562	0.586275	0.648067	0.714976	0.783226	0.857473	0.943786	1.05595	1.23047	1.43597	2.11651	47.0405
0.0434982	0.0802079	0.116251	0.149692	0.186677	0.220089	0.246094	0.273167	0.304656	0.342198	0.373597	0.410426	0.452976	0.492188	0.53611	0.586893	0.648564	0.715227	0.783742	0.857757	0.945468	1.05679	1.23047	1.44063	2.11698	47.6834
0.0435569	0.0802556	0.11631	0.149698	0.186712	0.220159	0.246094	0.273547	0.304755	0.342305	0.373773	0.410558	0.454125	0.492188	0.536332	0.587257	0.648593	0.715762	0.784322	0.859066	0.945508	1.06129	1.23047	1.44597	2.14878	48.2833
0.0435586	0.0803822	0.116468	0.149699	0.186789	0.220455	0.246094	0.273779	0.304795	0.342352	0.374157	0.410725	0.454282	0.492188	0.536506	0.587568	0.648725	0.715986	0.784361	0.859758	0.945846	1.06178	1.23047	1.44939	2.16301	48.3673
0.0435671	0.0804017	0.11659	0.150301	0.186982	0.220623	0.246094	0.273825	0.305006	0.342768	0.374821	0.410787	0.454365	0.492188	0.536608	0.587884	0.649263	0.716125	0.784393	0.861101	0.945849	1.06192	1.23047	1.45824	2.17717	48.5715
0.0436983	0.0804137	0.116643	0.150326	0.187125	0.220754	0.246094	0.27446	0.30513	0.342834	0.375	0.410868	0.454419	0.492188	0.536625	0.588017	0.650024	0.716871	0.784393	0.862419	0.945891	1.06283	1.23176	1.45864	2.19872	49.5946
0.0437826	0.0805808	0.116681	0.15039	0.187167	0.220771	0.246094	0.274907	0.305138	0.342839	0.375161	0.410992	0.454459	0.492315	0.536628	0.588294	0.650524	0.716919	0.784513	0.863164	0.947468	1.06407	1.23272	1.45867	2.19951	49.6753
0.0438373	0.0806335	0.116719	0.150449	0.187363	0.220834	0.246094	0.275233	0.305183	0.342879	0.375281	0.411097	0.455029	0.492799	0.536737	0.588475	0.650989	0.717181	0.784971	0.863281	0.948006	1.06657	1.2337	1.46376	2.21484	49.7226
0.0438577	0.0808418	0.116779	0.150605	0.187427	0.220861	0.246094	0.275395	0.305414	0.342903	0.375662	0.411177	0.455223	0.493094	0.536916	0.588667	0.651651	0.717265	0.785146	0.863435	0.948503	1.06749	1.23382	1.46379	2.21484	49.7268
0.0438913	0.0808691	0.1168	0.150624	0.187592	0.221003	0.246094	0.275939	0.305538	0.343094	0.375877	0.41186	0.455596	0.493223	0.537625	0.58945	0.652418	0.71748	0.785171	0.864044	0.949302	1.06924	1.23595	1.47436	2.22495	49.8046
0.0438917	0.0808909	0.116922	0.1507	0.187598	0.221003	0.246094	0.276535	0.306259	0.343559	0.375898	0.412182	0.455686	0.493515	0.537763	0.589607	0.652607	0.717862	0.785281	0.864683	0.950582	1.07042	1.2372	1.47558	2.22847	50.9468
0.0439403	0.0809503	0.116992	0.150711	0.187979	0.221553	0.246094	0.276634	0.30677	0.34364	0.376341	0.412802	0.456084	0.495445	0.537983	0.58976	0.653748	0.718197	0.785785	0.864842	0.951651	1.07043	1.23726	1.47656	2.22847	51.1536
0.0439524	0.0809818	0.117024	0.150719	0.18825	0.221568	0.246094	0.276798	0.307071	0.343691	0.376818	0.412846	0.45609	0.496094	0.538118	0.590306	0.653919	0.718714	0.78588	0.865311	0.952417	1.07187	1.23807	1.47656	2.22847	51.7448
0.0439572	0.0812695	0.117067	0.150841	0.188385	0.221598	0.246094	0.277102	0.307099	0.34372	0.377318	0.412995	0.457096	0.496094	0.538657	0.590492	0.65453	0.719005	0.786217	0.866283	0.95276	1.07231	1.24042	1.47673	2.23134	52.1333
0.0439945	0.0813123	0.117076	0.150843	0.188424	0.221974	0.246094	0.27736	0.307219	0.344024	0.377379	0.413364	0.457337	0.496094	0.538991	0.590716	0.655642	0.719204	0.786355	0.86729	0.952845	1.07405	1.2413	1.48056	2.26321	53.3073
0.0440269	0.0813597	0.117085	0.150868	0.188535	0.222144	0.246094	0.27738	0.307304	0.344437	0.377933	0.413622	0.457562	0.49611	0.539355	0.590955	0.65641	0.71936	0.786508	0.867537	0.953682	1.07419	1.24167	1.48311	2.26887	53.9183
0.0441231	0.0816798	0.117092	0.150871	0.188725	0.222277	0.246094	0.277413	0.307307	0.344697	0.377977	0.413817	0.457943	0.496143	0.540643	0.591011	0.657074	0.719743	0.787801	0.867909	0.953743	1.07475	1.24247	1.48547	2.26894	53.9708
0.044133	0.0817331	0.117112	0.150943	0.189003	0.222463	0.246094	0.277511	0.307438	0.3447	0.378471	0.413912	0.458072	0.496405	0.540909	0.591191	0.657174	0.719954	0.787807	0.868481	0.953946	1.07606	1.24247	1.48828	2.28591	55.6142
0.0441512	0.0817907	0.117177	0.150971	0.189012	0.222639	0.246094	0.277512	0.308082	0.345123	0.378675	0.414366	0.458775	0.49658	0.541519	0.592028	0.657846	0.720177	0.788335	0.868731	0.955328	1.07731	1.24311	1.48828	2.31689	57.4663
0.0442334	0.081827	0.117254	0.151221	0.189043	0.222652	0.246094	0.277661	0.308271	0.345192	0.378729	0.414667	0.459028	0.496693	0.541559	0.592066	0.657923	0.720458	0.788559	0.870073	0.956605	1.0797	1.24363	1.48905	2.33465	58.2674
0.0442423	0.0819009	0.117349	0.151393	0.1893	0.222748	0.246094	0.277761	0.308337	0.345584	0.379107	0.414746	0.459316	0.496887	0.541569	0.592108	0.658922	0.721804	0.788622	0.870097	0.958696	1.07977	1.24667	1.49478	2.34657	58.4053
0.0442553	0.0819616	0.117376	0.151472	0.18952	0.222803	0.246094	0.277958	0.308476	0.346152	0.3794	0.415031	0.459553	0.497056	0.541757	0.592328	0.658973	0.722047	0.789304	0.871158	0.959062	1.08055	1.24906	1.49693	2.42374	60.2111
0.0442894	0.0819651	0.117437	0.151489	0.18957	0.223018	0.246094	0.278002	0.308778	0.346208	0.379578	0.415159	0.459645	0.497125	0.541794	0.592702	0.659044	0.722178	0.790392	0.871604	0.959188	1.08143	1.25097	1.50209	2.43885	60.3573
0.0443059	0.0821765	0.117463	0.151519	0.189655	0.223032	0.246199	0.278066	0.308961	0.346276	0.38044	0.415373	0.459891	0.497258	0.542828	0.592844	0.660128	0.722492	0.790691	0.871668	0.961431	1.08235	1.25105	1.50881	2.44298	60.4896
0.0443218	0.0821899	0.117735	0.151677	0.189763	0.223262	0.24632	0.278214	0.309044	0.347073	0.380472	0.415493	0.460209	0.498861	0.542963	0.593373	0.660434	0.722896	0.790809	0.872042	0.962261	1.08268	1.25221	1.51182	2.46094	60.5435
0.0443483	0.0822824	0.117926	0.15173	0.189792	0.223311	0.246437	0.278635	0.30907	0.347241	0.380484	0.415775	0.460629	0.498993	0.543422	0.593475	0.660873	0.723248	0.790825	0.872084	0.962676	1.08316	1.25392	1.5142	2.48047	60.5791
0.0443652	0.0822829	0.118246	0.151956	0.18984	0.223447	0.246475	0.27868	0.309587	0.347368	0.380718	0.416054	0.460863	0.499508	0.543454	0.593516	0.661225	0.723729	0.791703	0.872615	0.962909	1.08317	1.25452	1.52395	2.50655	60.5971
0.0444104	0.0824265	0.118495	0.152025	0.189852	0.223581	0.246478	0.278703	0.309675	0.347422	0.380898	0.416299	0.460963	0.499546	0.543866	0.593824	0.661765	0.723991	0.791807	0.872703	0.963457	1.08381	1.25484	1.52591	2.51271	60.7909
0.0444751	0.0824459	0.118513	0.152362	0.190084	0.223762	0.2466	0.27884	0.309843	0.347495	0.381435	0.416473	0.461091	0.499572	0.544701	0.594132	0.661813	0.724291	0.792959	0.87297	0.964163	1.08522	1.25484	1.52842	2.51753	60.9612
0.0445003	0.0825197	0.118652	0.152446	0.19013	0.223845	0.246621	0.279434	0.310249	0.347506	0.381737	0.416648	0.461331	0.499832	0.544778	0.594627	0.661875	0.724396	0.794137	0.873716	0.965538	1.08611	1.25484	1.53138	2.52959	61.2622
0.0445961	0.0825497	0.118726	0.152577	0.191094	0.223871	0.246695	0.279524	0.310453	0.347707	0.381769	0.416677	0.461481	0.499972	0.544858	0.594906	0.662534	0.725248	0.794503	0.874544	0.965824	1.08659	1.25484	1.53647	2.58969	61.2834
0.0446362	0.0827524	0.118743	0.152595	0.191146	0.224054	0.246884	0.279824	0.310684	0.347769	0.381884	0.416724	0.461624	0.50007	0.545082	0.595342	0.663074	0.726023	0.795587	0.874565	0.966419	1.08763	1.25484	1.53973	2.58969	61.9614
0.0446404	0.0827713	0.118747	0.152607	0.191186	0.224295	0.246925	0.27989	0.310915	0.347807	0.382434	0.417538	0.461659	0.500274	0.545747	0.595532	0.663317	0.726074	0.796302	0.8746	0.967111	1.08851	1.25484	1.55324	2.62576	62.0672
0.044683	0.0828285	0.119009	0.152715	0.191218	0.224336	0.24693	0.280078	0.310992	0.348029	0.382557	0.417554	0.461661	0.50054	0.546132	0.595866	0.663513	0.726821	0.797028	0.874924	0.968459	1.08998	1.25484	1.55643	2.664	63.5648
0.0447757	0.0828413	0.119035	0.152778	0.191614	0.224563	0.24701	0.28015	0.311156	0.348029	0.382749	0.417618	0.462051	0.501077	0.546188	0.595897	0.663677	0.72729	0.797209	0.875336	0.96891	1.092	1.25509	1.55776	2.70703	64.399
0.0447891	0.0829872	0.11907	0.152951	0.19163	0.2247	0.247222	0.280181	0.311191	0.348029	0.383006	0.417829	0.46211	0.501379	0.546356	0.596553	0.664882	0.727391	0.797619	0.876234	0.971533	1.09214	1.25546	1.56284	2.77325	64.9692
0.0447948	0.0830064	0.119236	0.152991	0.191913	0.225003	0.247833	0.280221	0.311314	0.348029	0.383391	0.418288	0.462471	0.5014	0.54645	0.596893	0.664988	0.728686	0.798012	0.876452	0.97158	1.09274	1.25579	1.57013	2.80633	71.0234
0.0448134	0.0830115	0.119258	0.153189	0.191965	0.225714	0.247899	0.28031	0.311333	0.348029	0.383667	0.418349	0.463158	0.501804	0.546996	0.596902	0.66645	0.729056	0.798035	0.876515	0.971585	1.09405	1.25748	1.57449	2.84243	74.7767
0.0448372	0.0830329	0.119262	0.153339	0.191973	0.225775	0.248047	0.280358	0.311643	0.348029	0.383791	0.418568	0.464372	0.502098	0.547692	0.596989	0.667447	0.729968	0.798156	0.876548	0.971851	1.09497	1.25782	1.57577	2.92336	77.3851
0.0448745	0.0830537	0.119539	0.153422	0.191988	0.226058	0.248047	0.280484	0.311826	0.348029	0.383855	0.418676	0.464522	0.50263	0.548301	0.597298	0.667612	0.730473	0.798366	0.877826	0.97494	1.09523	1.25883	1.57577	3.42251	79.4906
0.0449274	0.0830585	0.119588	0.153461	0.192105	0.226062	0.248047	0.280515	0.312253	0.348029	0.384012	0.420053	0.464673	0.502848	0.548318	0.598077	0.668052	0.730994	0.798614	0.877854	0.975238	1.09601	1.26209	1.58288	3.52056	81.4789
0.0449409	0.0831507	0.119693	0.153506	0.192281	0.226243	0.248047	0.280597	0.312304	0.348029	0.384053	0.420513	0.46485	0.503529	0.54849	0.598094	0.668789	0.731042	0.798808	0.879017	0.975414	1.09792	1.26399	1.58301	3.52151	92.9624
0.0449761	0.0831608	0.119788	0.15353	0.192306	0.226361	0.248047	0.280614	0.312397	0.348029	0.384198	0.420557	0.464927	0.503624	0.548597	0.598176	0.669241	0.734053	0.798883	0.879905	0.975493	1.09827	1.26571	1.58364	3.55149	95.3541
0.0451969	0.0832926	0.119906	0.153707	0.192398	0.22652	0.248047	0.280672	0.31255	0.348029	0.384209	0.420628	0.465051	0.50375	0.548946	0.598581	0.669406	0.734595	0.799119	0.880021	0.976128	1.0992	1.26744	1.58487	3.63344	96.6727
0.0452225	0.0832951	0.120015	0.153898	0.192535	0.226685	0.248047	0.280794	0.312652	0.348029	0.384241	0.420827	0.465408	0.504577	0.549118	0.598697	0.669825	0.735112	0.799152	0.880303	0.976253	1.09924	1.26832	1.58827	3.63491	96.7985
0.0452232	0.0834533	0.120059	0.154004	0.192785	0.226781	0.248047	0.281043	0.312912	0.348029	0.38468	0.420949	0.465787	0.506023	0.549334	0.599045	0.66984	0.735133	0.799344	0.881163	0.976457	1.0998	1.26904	1.59174	3.82146	97.2642
0.0452533	0.0835013	0.120252	0.154081	0.193108	0.22687	0.248047	0.281131	0.313211	0.348029	0.384767	0.421014	0.465873	0.506036	0.549537	0.599543	0.670232	0.736201	0.800281	0.881168	0.97714	1.10056	1.27497	1.59243	3.86975
0.0452615	0.0835924	0.120272	0.154097	0.193327	0.226944	0.248047	0.281402	0.313402	0.348029	0.384784	0.421081	0.466079	0.506052	0.54993	0.599881	0.670553	0.73638	0.801217	0.881659	0.977345	1.10056	1.27525	1.59424	3.88986
0.0453021	0.0836719	0.120287	0.154118	0.193493	0.227214	0.248047	0.281562	0.313992	0.348029	0.384876	0.421095	0.466342	0.506087	0.550282	0.600176	0.670693	0.736466	0.801381	0.882041	0.977973	1.10096	1.28171	1.59558	4.03791
0.0453093	0.0837196	0.12037	0.154229	0.193539	0.227526	0.248047	0.281905	0.31465	0.3481	0.385159	0.421125	0.466506	0.506109	0.550282	0.600791	0.671197	0.73683	0.801533	0.882109	0.978075	1.10178	1.28207	1.60297	4.38027
0.045319	0.0837447	0.120444	0.15465	0.193661	0.22789	0.248047	0.282147	0.314969	0.34812	0.385785	0.421717	0.466594	0.506208	0.550282	0.601381	0.671413	0.737195	0.801757	0.882407	0.979275	1.10393	1.28291	1.61079	4.42795
0.045401	0.0839843	0.120537	0.155006	0.193799	0.22789	0.248047	0.282294	0.314991	0.348173	0.385809	0.421812	0.466864	0.507375	0.550282	0.603517	0.672146	0.738053	0.802221	0.884007	0.979566	1.10409	1.28323	1.61296	4.62104
0.0454016	0.0840972	0.120547	0.155066	0.193837	0.22799	0.248047	0.28231	0.315411	0.348461	0.385844	0.421817	0.467302	0.507684	0.550282	0.604065	0.672327	0.738281	0.802297	0.88406	0.979907	1.10519	1.28367	1.61389	4.81539
0.0454929	0.0841108	0.120808	0.155121	0.193991	0.228096	0.248047	0.282481	0.315697	0.348632	0.385901	0.422296	0.467639	0.509048	0.550282	0.605226	0.673173	0.738281	0.804758	0.885062	0.981789	1.10833	1.28627	1.6175	4.86464
0.0454996	0.084361	0.120813	0.155278	0.193999	0.228157	0.248162	0.282614	0.315771	0.348813	0.385936	0.42243	0.467642	0.509134	0.550282	0.605612	0.67372	0.738281	0.805152	0.885992	0.981988	1.10932	1.28905	1.61776	4.88756
0.0455227	0.0844617	0.120896	0.155279	0.194079	0.228171	0.248279	0.282635	0.315809	0.349126	0.386244	0.422449	0.467683	0.509238	0.550282	0.606441	0.674607	0.738281	0.806866	0.886222	0.983239	1.11103	1.29274	1.61869	4.92839
0.045543	0.0844995	0.12091	0.155281	0.194095	0.228551	0.248434	0.282853	0.316014	0.349645	0.386355	0.422556	0.467814	0.509377	0.550282	0.60647	0.675012	0.738281	0.807857	0.886345	0.983913	1.11188	1.29306	1.61881	4.98432
0.0456902	0.0845167	0.121008	0.155285	0.194153	0.228909	0.248462	0.282915	0.316082	0.34979	0.386544	0.422916	0.468788	0.509485	0.550282	0.606835	0.675141	0.738281	0.808421	0.886555	0.984368	1.11191	1.29596	1.62622	5.01976
0.0457485	0.0845894	0.121032	0.155387	0.194232	0.229029	0.248621	0.282978	0.316201	0.34988	0.387205	0.423152	0.469131	0.509826	0.550347	0.607705	0.675299	0.738319	0.808545	0.886673	0.984375	1.11256	1.29611	1.63153	5.07966
0.0457519	0.0847058	0.121111	0.155575	0.194309	0.229223	0.248714	0.282993	0.316545	0.349947	0.387299	0.423478	0.46939	0.51002	0.550791	0.608148	0.675575	0.73833	0.808954	0.887304	0.984375	1.11285	1.2975	1.63454	5.09032
0.0458412	0.0847501	0.121373	0.15562	0.194339	0.229307	0.249046	0.283019	0.316603	0.34999	0.387904	0.423478	0.469757	0.510041	0.550917	0.608185	0.675576	0.739237	0.809077	0.887304	0.984375	1.11478	1.30073	1.63545	5.18288
0.0458478	0.0847506	0.121377	0.155723	0.194573	0.229478	0.249057	0.28308	0.316848	0.350417	0.388485	0.423623	0.469786	0.51115	0.551314	0.608321	0.675701	0.740388	0.810059	0.887304	0.984375	1.11705	1.3025	1.64103	5.27877
0.0459089	0.0848043	0.121552	0.155726	0.1949	0.229739	0.249075	0.283201	0.316978	0.350629	0.388585	0.424061	0.470582	0.511477	0.5516	0.608397	0.676338	0.740518	0.810099	0.887304	0.984375	1.11712	1.30939	1.64435	5.72112
0.0459364	0.0848237	0.121571	0.156082	0.194935	0.229784	0.249079	0.283338	0.317442	0.350686	0.388744	0.424701	0.470675	0.511663	0.551728	0.608444	0.676822	0.740603	0.81028	0.887304	0.985593	1.11826	1.31081	1.65085	5.81192
0.0459784	0.0850019	0.121583	0.156119	0.195157	0.229858	0.24924	0.283614	0.317878	0.350791	0.389212	0.424799	0.470937	0.5124	0.551765	0.60853	0.677218	0.741501	0.811469	0.887304	0.98655	1.11863	1.31465	1.65085	6.16525
0.0460195	0.0850606	0.121609	0.156274	0.19516	0.229941	0.249375	0.283782	0.318795	0.350791	0.389333	0.424933	0.471544	0.512657	0.551922	0.608728	0.6773	0.741537	0.811667	0.887304	0.986818	1.11926	1.31522	1.65085	6.55211
0.046021	0.0850929	0.121653	0.156344	0.195426	0.230117	0.249708	0.284271	0.319088	0.350791	0.389346	0.425222	0.471865	0.512735	0.552028	0.609106	0.67776	0.741879	0.813136	0.887304	0.98714	1.12195	1.32057	1.65697	7.47639
0.0460723	0.0851344	0.121703	0.156423	0.195549	0.230204	0.249728	0.284515	0.319338	0.350791	0.389724	0.425249	0.472337	0.512766	0.554085	0.610053	0.678151	0.741889	0.813392	0.887304	0.987908	1.12388	1.32235	1.65711	7.98213
0.0460827	0.0851819	0.121743	0.15654	0.196122	0.230506	0.24993	0.284615	0.319576	0.350791	0.389835	0.42531	0.472406	0.513141	0.55465	0.610269	0.679222	0.742349	0.813446	0.888197	0.988966	1.12559	1.32268	1.66974	8.90924
0.0460842	0.0852171	0.121759	0.156689	0.196135	0.230551	0.249946	0.284688	0.31984	0.350791	0.390163	0.425488	0.473638	0.513378	0.55465	0.610308	0.67968	0.742377	0.813754	0.88829	0.992188	1.12818	1.32343	1.67183	9.41256
0.0461649	0.0852694	0.121761	0.156727	0.196234	0.230606	0.250056	0.284694	0.320103	0.350791	0.390658	0.425826	0.473834	0.513807	0.55465	0.610361	0.679878	0.744141	0.813954	0.888606	0.992691	1.1305	1.32526	1.67528	9.44534
0.0462034	0.0852935	0.121803	0.156847	0.196251	0.230678	0.250105	0.284716	0.320255	0.350791	0.391511	0.426005	0.47401	0.514207	0.55465	0.610739	0.680431	0.744141	0.814219	0.889014	0.994166	1.13071	1.32526	1.67606	9.79791
0.0462322	0.085378	0.121842	0.156869	0.196308	0.230979	0.250348	0.284824	0.320552	0.350816	0.391662	0.426085	0.475842	0.514229	0.55465	0.611195	0.681052	0.744186	0.814468	0.889034	0.996041	1.13277	1.32526	1.69955	10.0374
0.0462908	0.0854063	0.12186	0.157051	0.196315	0.231081	0.250511	0.285047	0.320607	0.350861	0.391668	0.426745	0.475988	0.514357	0.55465	0.611708	0.681173	0.744356	0.814862	0.889348	0.997012	1.13531	1.33146	1.69986	11.1824
0.0462996	0.0854985	0.12191	0.157111	0.196336	0.231114	0.250543	0.285047	0.320628	0.351008	0.391801	0.42706	0.476604	0.514493	0.555097	0.611721	0.68124	0.744477	0.815289	0.889589	0.998463	1.13621	1.33257	1.7017	11.1924
0.0463144	0.0855474	0.121995	0.157444	0.196349	0.231208	0.250601	0.285244	0.321645	0.351151	0.392089	0.427338	0.476954	0.514627	0.555814	0.612861	0.681383	0.744536	0.816411	0.890397	0.998778	1.13784	1.33262	1.7066	11.2653
0.0463506	0.085567	0.121995	0.157485	0.196392	0.231461	0.250617	0.285255	0.321722	0.352097	0.392272	0.427541	0.477121	0.515189	0.556451	0.613667	0.681646	0.744651	0.819335	0.891434	0.998962	1.13922	1.3368	1.70963	11.9639
0.0463815	0.0856188	0.12204	0.157559	0.19675	0.232142	0.250742	0.285451	0.321924	0.352379	0.392715	0.42758	0.47734	0.516016	0.557273	0.61417	0.681731	0.744889	0.820342	0.891585	0.999335	1.13979	1.33743	1.71219	12.1947
0.04639	0.0857173	0.122303	0.157675	0.196957	0.23227	0.250965	0.285828	0.322037	0.352477	0.393323	0.427839	0.477846	0.516179	0.557451	0.614489	0.681789	0.745203	0.820487	0.892272	0.999335	1.14271	1.33985	1.72266	12.7316
0.0464084	0.0857249	0.122464	0.157702	0.19703	0.23261	0.250973	0.286093	0.322073	0.352704	0.393754	0.427909	0.478007	0.516303	0.55762	0.6172	0.68215	0.746035	0.820784	0.892348	0.999845	1.14501	1.34013	1.72266	13.1815
0.0464441	0.085728	0.122531	0.157847	0.19718	0.232676	0.251006	0.286441	0.322148	0.352751	0.393987	0.428523	0.478431	0.516344	0.55808	0.618081	0.682419	0.746778	0.821022	0.893137	1.0007	1.14511	1.3417	1.72851	13.6781
0.0465399	0.0857443	0.122586	0.158041	0.197348	0.232729	0.251138	0.286654	0.322363	0.353466	0.394101	0.42881	0.478817	0.516389	0.558137	0.618228	0.682636	0.747221	0.822149	0.893457	1.00073	1.14522	1.34193	1.72993	13.8048
0.0467565	0.0859185	0.122609	0.158045	0.197354	0.232761	0.251144	0.286941	0.322364	0.353469	0.394516	0.429214	0.479059	0.517283	0.558643	0.618262	0.683544	0.747226	0.822526	0.894346	1.00184	1.14773	1.34346	1.7304	14.6537
0.046818	0.0859267	0.12276	0.15805	0.197495	0.232932	0.251291	0.287248	0.322614	0.353617	0.394678	0.429221	0.47953	0.517453	0.558957	0.618275	0.683788	0.747756	0.82298	0.894346	1.00276	1.14891	1.34614	1.73183	14.9008
0.0468231	0.0859669	0.122888	0.158117	0.197587	0.233274	0.251545	0.287249	0.322796	0.353625	0.395014	0.429951	0.479657	0.517632	0.559065	0.618637	0.683971	0.747822	0.823077	0.89449	1.00546	1.14955	1.34675	1.73603	14.9423
0.0470281	0.0860998	0.122909	0.158187	0.197927	0.233595	0.25175	0.287273	0.322972	0.353848	0.396136	0.430147	0.479713	0.517854	0.559129	0.619474	0.684012	0.74784	0.823101	0.894594	1.0065	1.15007	1.36082	1.73633	15.1062
0.0471708	0.0863198	0.12293	0.158327	0.19808	0.234043	0.251925	0.2873	0.32317	0.353949	0.396144	0.43041	0.480202	0.51827	0.559398	0.619971	0.684254	0.74787	0.823403	0.894662	1.00771	1.15021	1.36472	1.73633	15.1129
0.0472578	0.0863331	0.122947	0.158614	0.198119	0.234045	0.251952	0.287311	0.323173	0.353975	0.396197	0.430567	0.480348	0.51829	0.559972	0.620363	0.684468	0.747927	0.824974	0.896054	1.00803	1.15171	1.36513	1.73694	15.2039
0.0473208	0.0865237	0.122954	0.15865	0.198183	0.234108	0.251999	0.287613	0.323214	0.354279	0.396359	0.430779	0.480738	0.518584	0.560018	0.620593	0.684699	0.748083	0.82506	0.896325	1.00865	1.15211	1.36749	1.74015	15.7231
0.0473558	0.0865279	0.123017	0.159053	0.198445	0.234297	0.252145	0.287617	0.323517	0.354313	0.396442	0.431073	0.480993	0.518737	0.560071	0.621066	0.68553	0.748446	0.825208	0.89658	1.00867	1.15361	1.37109	1.74015	15.9515
0.0473591	0.0865611	0.123217	0.159215	0.198642	0.23432	0.252397	0.287818	0.323804	0.354651	0.396682	0.431179	0.481195	0.519435	0.560265	0.621143	0.685721	0.748671	0.826346	0.897942	1.00895	1.15422	1.37212	1.74015	15.971
0.0474042	0.0866398	0.123244	0.159298	0.198798	0.234365	0.252771	0.287894	0.323826	0.354986	0.396791	0.431269	0.481397	0.519758	0.560432	0.621434	0.685924	0.749578	0.827006	0.898002	1.00955	1.15742	1.37467	1.74015	16.7096
0.0474558	0.0866534	0.123316	0.159368	0.198817	0.234511	0.253069	0.2879	0.323898	0.356184	0.397132	0.431429	0.481529	0.519886	0.560669	0.621547	0.685994	0.75036	0.827288	0.898334	1.00957	1.1599	1.37615	1.74015	16.9223
0.0474629	0.0868642	0.123374	0.159439	0.19898	0.234597	0.253163	0.287913	0.324117	0.3563	0.397544	0.431502	0.481604	0.519889	0.560725	0.621753	0.686922	0.751736	0.827448	0.900225	1.00981	1.15996	1.37618	1.74746	16.9625
0.0475111	0.0868807	0.123518	0.15948	0.199137	0.234876	0.253186	0.287992	0.324297	0.356329	0.397716	0.431586	0.482114	0.52006	0.560982	0.622089	0.687897	0.751832	0.827822	0.900704	1.01124	1.16067	1.37721	1.74771	17.9693
0.0475468	0.0868862	0.123715	0.159497	0.199156	0.235054	0.253226	0.288068	0.324928	0.357261	0.397809	0.432027	0.482226	0.520164	0.561402	0.622653	0.688242	0.751947	0.82786	0.900961	1.01443	1.16113	1.3782	1.74825	18.3732
0.0476191	0.0869061	0.123734	0.159595	0.199231	0.235149	0.253261	0.288176	0.32505	0.357321	0.398107	0.432182	0.482271	0.520308	0.561641	0.622994	0.689698	0.752031	0.828974	0.901408	1.01445	1.16229	1.37903	1.74952	19.4254
0.0476227	0.0869949	0.123807	0.159636	0.199351	0.235166	0.253391	0.288347	0.325136	0.357326	0.398456	0.432647	0.48231	0.520402	0.562444	0.623042	0.690575	0.75236	0.829615	0.902643	1.01451	1.16424	1.38013	1.75396	20.0685
0.0476249	0.0870073	0.123822	0.159727	0.199614	0.235186	0.2538	0.288792	0.325289	0.357826	0.39859	0.432775	0.482439	0.520624	0.562618	0.623049	0.691046	0.752414	0.829717	0.902918	1.01467	1.16562	1.38161	1.75736	21.2744
0.047659	0.0870248	0.123874	0.160062	0.199701	0.235243	0.254187	0.288966	0.325303	0.357987	0.398856	0.432856	0.482678	0.521235	0.562935	0.623765	0.691116	0.752447	0.831319	0.903638	1.01467	1.16671	1.38187	1.75755	22.1189
0.0476609	0.0870394	0.123965	0.160071	0.199771	0.235297	0.254863	0.289189	0.32546	0.358333	0.399273	0.433509	0.482781	0.521322	0.563338	0.623963	0.691795	0.753313	0.831989	0.905366	1.01467	1.16815	1.38272	1.75888	22.2881
0.0476865	0.0870553	0.124043	0.160279	0.199934	0.23543	0.254896	0.289217	0.325593	0.358346	0.399298	0.433681	0.483186	0.521789	0.564212	0.624743	0.69192	0.754332	0.832428	0.905419	1.01479	1.16888	1.38573	1.75968	25.8235
0.0477257	0.0870717	0.124047	0.160308	0.199995	0.235585	0.254971	0.289477	0.325675	0.35863	0.399372	0.433804	0.48326	0.522015	0.564279	0.624998	0.692294	0.754426	0.83269	0.905486	1.01508	1.17119	1.38862	1.78633	28.7526
0.0477576	0.0871009	0.124118	0.160308	0.200183	0.235697	0.25519	0.289657	0.325832	0.358748	0.399402	0.433876	0.483271	0.52254	0.56433	0.625064	0.693123	0.755198	0.832755	0.906766	1.01674	1.17189	1.38875	1.79363	29.2664
0.0477804	0.0871269	0.124278	0.16037	0.200411	0.235729	0.255252	0.289724	0.326054	0.359064	0.399543	0.433907	0.483667	0.522552	0.564356	0.626183	0.693203	0.755277	0.833675	0.906853	1.01695	1.1754	1.39179	1.80186	29.7584
0.0477859	0.0871665	0.124374	0.160442	0.200428	0.236159	0.255342	0.290029	0.326142	0.359209	0.399547	0.434055	0.483779	0.522609	0.56483	0.626599	0.6937	0.755337	0.834482	0.908912	1.01812	1.17583	1.39822	1.80717	30.0792
0.047795	0.0871743	0.124688	0.16049	0.20049	0.236233	0.255356	0.290081	0.326217	0.359333	0.399624	0.434384	0.483907	0.522825	0.566146	0.626616	0.693994	0.755414	0.834811	0.910057	1.02025	1.17747	1.39899	1.80944	30.3667
0.0477994	0.0871854	0.124696	0.16075	0.200582	0.236243	0.25537	0.290419	0.326433	0.359445	0.399838	0.434888	0.48455	0.522974	0.566585	0.62673	0.694128	0.755884	0.836015	0.910144	1.02038	1.17779	1.39914	1.82378	30.4926
0.047816	0.0871898	0.124832	0.160886	0.200674	0.236507	0.255426	0.290524	0.326483	0.359509	0.399894	0.434941	0.485095	0.523433	0.566612	0.627018	0.694224	0.7575	0.836563	0.910334	1.02111	1.17804	1.39931	1.84539	30.5498
0.0478924	0.0873375	0.124972	0.160986	0.200693	0.236743	0.255961	0.29074	0.326659	0.359537	0.400071	0.435175	0.485441	0.5242	0.566646	0.62742	0.694238	0.757734	0.836851	0.911583	1.02138	1.17851	1.40116	1.84636	30.6817
0.0479144	0.0873724	0.125025	0.161498	0.20073	0.236798	0.256235	0.290765	0.326668	0.359571	0.400149	0.43571	0.485456	0.524244	0.56691	0.628131	0.694527	0.758343	0.838101	0.912195	1.0227	1.17914	1.40511	1.8539	30.6817
0.0480339	0.0873842	0.125077	0.161516	0.200743	0.236832	0.256601	0.290939	0.326982	0.35999	0.400313	0.436087	0.48551	0.524653	0.567104	0.628142	0.69454	0.758453	0.838196	0.912232	1.02272	1.18579	1.41188	1.85617	31.0059
0.0480961	0.0874712	0.125095	0.161648	0.200803	0.236868	0.256607	0.291027	0.327116	0.360153	0.400532	0.436585	0.48553	0.524667	0.567218	0.628492	0.694561	0.758487	0.838816	0.912302	1.02272	1.18854	1.41208	1.8614	31.1395
0.048137	0.0875929	0.125126	0.162178	0.201041	0.237	0.256714	0.291717	0.327635	0.360284	0.400643	0.436601	0.485536	0.524995	0.567846	0.628947	0.694715	0.758506	0.839233	0.912419	1.02309	1.18943	1.41268	1.87739	31.2416
0.0481467	0.087614	0.125231	0.16228	0.201102	0.237057	0.256782	0.292061	0.327754	0.360374	0.401252	0.436612	0.485898	0.525529	0.568038	0.629216	0.695039	0.758848	0.839551	0.914334	1.02379	1.19076	1.4129	1.88419	31.4707
0.0481681	0.0876247	0.125413	0.162467	0.201171	0.23722	0.256864	0.292254	0.327815	0.36089	0.401278	0.436837	0.486068	0.526191	0.568146	0.629368	0.695685	0.759103	0.83967	0.914836	1.02427	1.19652	1.41368	1.90619	31.6695
0.0481968	0.0876289	0.125484	0.162538	0.201224	0.237234	0.256869	0.292417	0.327869	0.361075	0.401285	0.437056	0.486099	0.52678	0.568341	0.630671	0.695798	0.7595	0.840846	0.915069	1.02627	1.1973	1.41501	1.93321	31.7072
0.048232	0.0877077	0.125527	0.162645	0.201268	0.237299	0.256914	0.292513	0.327911	0.361149	0.4014	0.437688	0.486374	0.526895	0.568659	0.630859	0.696058	0.760367	0.840941	0.915468	1.0266	1.19802	1.41606	1.96875	31.9596
0.0482824	0.0878877	0.125823	0.162754	0.201479	0.237428	0.257294	0.292684	0.32795	0.36124	0.401665	0.437735	0.486607	0.526915	0.568939	0.631257	0.696058	0.760524	0.841367	0.91576	1.02737	1.19994	1.41793	1.96875	32.0853
0.0483103	0.0879781	0.125849	0.162788	0.201528	0.237577	0.257931	0.292924	0.328233	0.361389	0.401928	0.438096	0.486623	0.52721	0.569065	0.631298	0.696058	0.760638	0.841579	0.918167	1.0275	1.20009	1.41902	1.97132	32.1601
0.0483217	0.0880559	0.125849	0.16283	0.201768	0.237708	0.258047	0.293297	0.328603	0.361456	0.40204	0.43876	0.487018	0.527698	0.569065	0.631714	0.696058	0.760828	0.842706	0.918782	1.02823	1.20076	1.42259	1.98407	32.4013
0.048338	0.088059	0.125995	0.162842	0.201826	0.237794	0.258047	0.293356	0.328892	0.361647	0.402218	0.438915	0.487222	0.527991	0.569901	0.632003	0.696175	0.760916	0.843321	0.918787	1.02955	1.20293	1.42454	1.98729	32.6311
0.0483587	0.0881029	0.126089	0.162852	0.202043	0.238091	0.25811	0.293538	0.329103	0.362205	0.40278	0.438946	0.487299	0.528413	0.570076	0.632851	0.69658	0.763936	0.843515	0.919782	1.03002	1.204	1.42727	1.98903	32.851
0.0483954	0.0881029	0.126092	0.162921	0.202057	0.238168	0.258281	0.293607	0.329539	0.362369	0.402843	0.439028	0.488008	0.528763	0.570834	0.632906	0.696725	0.764066	0.843942	0.920172	1.03127	1.20537	1.43003	1.99656	32.857
0.0484127	0.0881058	0.126095	0.162962	0.202188	0.238292	0.258361	0.293697	0.329577	0.362942	0.40285	0.439162	0.488847	0.528846	0.570902	0.632937	0.697398	0.764474	0.844026	0.921206	1.03168	1.20772	1.43496	2.00187	33.0387
0.0484631	0.0882068	0.126113	0.163074	0.202298	0.238765	0.258398	0.294187	0.329615	0.363038	0.403275	0.43924	0.488904	0.529159	0.571467	0.633226	0.698258	0.765666	0.844537	0.924267	1.03227	1.2091	1.43496	2.01328	33.2716
0.0484877	0.0882466	0.126153	0.163078	0.202413	0.238875	0.258717	0.294562	0.329786	0.363121	0.40344	0.439328	0.489043	0.529546	0.571543	0.634154	0.698311	0.766187	0.846547	0.924322	1.03309	1.20979	1.43496	2.01377	33.4496
0.0485118	0.088294	0.126249	0.163103	0.202476	0.239086	0.258731	0.294742	0.329916	0.363186	0.403508	0.439975	0.489673	0.529619	0.571862	0.634369	0.698713	0.766207	0.84806	0.924327	1.03522	1.21165	1.43496	2.02934	34.0403
0.0486874	0.0883014	0.12627	0.163235	0.202672	0.239263	0.25939	0.294847	0.330622	0.363418	0.403519	0.440058	0.489711	0.529689	0.571954	0.634589	0.699025	0.766623	0.848443	0.924714	1.0377	1.21429	1.43607	2.0305	34.2842
0.0487551	0.0883523	0.12648	0.163251	0.202696	0.239419	0.259599	0.294943	0.330727	0.363479	0.403568	0.440285	0.490074	0.530354	0.572995	0.63534	0.699251	0.767374	0.848525	0.925977	1.03798	1.21449	1.4417	2.03244	35.0671
0.0487714	0.088397	0.126578	0.163698	0.202714	0.239554	0.259667	0.294961	0.330988	0.363766	0.403629	0.440466	0.490205	0.530834	0.573049	0.635604	0.70076	0.768348	0.848632	0.926465	1.04169	1.21528	1.44218	2.07131	36.0141
0.0488389	0.0884304	0.126685	0.163775	0.202731	0.239709	0.259777	0.294969	0.331229	0.363864	0.403954	0.440918	0.490235	0.530862	0.573469	0.635712	0.701436	0.770097	0.848665	0.926615	1.04214	1.21617	1.44234	2.07317	37.4144
0.0488981	0.0887176	0.126686	0.16378	0.202782	0.239763	0.259884	0.295534	0.33133	0.364819	0.404214	0.441385	0.490252	0.531232	0.573733	0.635774	0.701583	0.770421	0.849002	0.926875	1.04219	1.21712	1.44265	2.07499	37.8299
0.0489728	0.0887803	0.126762	0.163843	0.202846	0.239866	0.260293	0.296141	0.331499	0.364988	0.404386	0.441438	0.490269	0.531442	0.573857	0.635776	0.701736	0.77074	0.850169	0.927241	1.04302	1.21714	1.44278	2.08074	39.1693
0.0490803	0.088802	0.126814	0.163873	0.202925	0.23992	0.26045	0.297128	0.331607	0.364998	0.404451	0.44178	0.490307	0.531547	0.574021	0.636057	0.701793	0.770832	0.850293	0.927267	1.04302	1.21757	1.44388	2.08396	39.2044
0.0490863	0.0888519	0.126863	0.163961	0.203115	0.239944	0.260457	0.29716	0.332064	0.365323	0.404469	0.442103	0.490425	0.531673	0.574022	0.638168	0.702245	0.771015	0.850608	0.927665	1.04352	1.21862	1.44635	2.09417	40.5371
0.0491264	0.0890115	0.126896	0.163981	0.203378	0.239967	0.260734	0.297611	0.332075	0.365477	0.405064	0.442369	0.49069	0.532007	0.5748	0.638392	0.702272	0.771106	0.850907	0.927685	1.04388	1.2219	1.44827	2.10317	40.8037
0.0491376	0.089034	0.126922	0.164067	0.203459	0.239971	0.260786	0.297626	0.332454	0.365607	0.405568	0.442767	0.49105	0.532104	0.574895	0.638548	0.702557	0.771388	0.851299	0.929003	1.04409	1.22388	1.45151	2.11698	41.1738
0.0491575	0.0890442	0.126942	0.164323	0.203623	0.240361	0.261047	0.297673	0.332659	0.365633	0.405633	0.442803	0.491428	0.532239	0.575017	0.639701	0.703541	0.771753	0.851421	0.929651	1.04409	1.22584	1.45383	2.11698	41.3673
0.0492101	0.0890766	0.126953	0.164522	0.203627	0.240374	0.261212	0.298089	0.332851	0.365814	0.405691	0.442885	0.491523	0.532293	0.575099	0.639732	0.704121	0.771918	0.852462	0.930101	1.04409	1.22716	1.45422	2.12602	42.3586
0.0492287	0.0890867	0.12713	0.164583	0.203699	0.240528	0.261249	0.298176	0.333028	0.366127	0.405909	0.442965	0.491594	0.532999	0.575243	0.639847	0.704982	0.772639	0.85298	0.930702	1.04706	1.22896	1.45648	2.14017	43.2505
0.0492351	0.0893405	0.127136	0.164628	0.203908	0.240626	0.261489	0.298362	0.333436	0.36656	0.40687	0.443064	0.491614	0.533473	0.575476	0.640087	0.704998	0.774094	0.853617	0.9311	1.04757	1.23047	1.45787	2.14201	43.6122
0.0493424	0.0893938	0.127221	0.164876	0.204181	0.240681	0.261809	0.298473	0.333534	0.366619	0.406943	0.443337	0.491719	0.533517	0.57559	0.640107	0.705455	0.774235	0.853642	0.932126	1.0488	1.23047	1.45889	2.14753	43.7775
0.0493473	0.0894602	0.127311	0.16529	0.204883	0.240723	0.261969	0.298575	0.333548	0.366718	0.407071	0.443419	0.491764	0.534012	0.575674	0.640314	0.705629	0.774282	0.853745	0.933585	1.049	1.23047	1.46498	2.19621	43.8738
0.0493742	0.0894741	0.127359	0.165321	0.205059	0.240773	0.262355	0.29863	0.333574	0.367122	0.407302	0.443628	0.491832	0.53428	0.576099	0.64042	0.706226	0.774345	0.853747	0.934012	1.04934	1.23047	1.4658	2.20113	44.8646
0.0494215	0.0897492	0.127364	0.165685	0.205067	0.240816	0.262371	0.298819	0.333883	0.367426	0.408213	0.443641	0.491961	0.534342	0.576491	0.640523	0.706261	0.774433	0.854075	0.934185	1.0501	1.23047	1.46706	2.20113	44.9516
0.0494595	0.0897627	0.127402	0.165751	0.205085	0.24098	0.262373	0.298997	0.333903	0.367455	0.408936	0.444044	0.492188	0.534396	0.576553	0.641369	0.707326	0.77524	0.854792	0.934272	1.05234	1.23052	1.47331	2.21484	45.2096
0.0495061	0.0897693	0.127422	0.165937	0.205134	0.240998	0.262384	0.299255	0.334236	0.367456	0.409032	0.444202	0.492188	0.53482	0.577003	0.641377	0.707398	0.775423	0.854891	0.934317	1.05308	1.23062	1.47656	2.21484	45.2233
0.0495123	0.089948	0.127461	0.166024	0.205137	0.241007	0.262452	0.299693	0.334415	0.367486	0.40917	0.445397	0.492188	0.535063	0.577281	0.641796	0.708335	0.776116	0.855344	0.934455	1.05323	1.23154	1.47829	2.22847	45.2627
0.0495242	0.0899947	0.127683	0.166035	0.205168	0.24106	0.262642	0.299768	0.334773	0.367553	0.409318	0.445426	0.492188	0.535228	0.577968	0.642348	0.708934	0.776312	0.855374	0.935169	1.05338	1.23196	1.48659	2.23112	45.4968
0.0495389	0.0900263	0.128077	0.166058	0.205473	0.241155	0.262753	0.299825	0.335004	0.367623	0.409357	0.445614	0.492188	0.535654	0.578486	0.642378	0.711053	0.777147	0.855416	0.935536	1.05616	1.23305	1.48828	2.29204	45.9219
0.0495903	0.0900422	0.128093	0.166227	0.205526	0.241205	0.262885	0.299972	0.33507	0.367693	0.409482	0.446074	0.492188	0.536017	0.578539	0.643945	0.711081	0.778152	0.85614	0.935562	1.05617	1.23935	1.48828	2.31493	46.018
0.0496392	0.0900886	0.128196	0.166791	0.20559	0.2413	0.262907	0.300045	0.335156	0.367787	0.409506	0.44611	0.492188	0.536023	0.579312	0.644904	0.712337	0.778217	0.856626	0.935617	1.05675	1.23966	1.49373	2.33042	46.443
0.0496411	0.0901873	0.128249	0.166868	0.20579	0.241511	0.26342	0.300272	0.335167	0.367888	0.409628	0.446187	0.492188	0.536401	0.579335	0.644931	0.712694	0.778217	0.85736	0.935818	1.05757	1.24187	1.4943	2.33465	46.5107
0.0496812	0.0902719	0.128308	0.166891	0.205828	0.241717	0.263514	0.300702	0.335186	0.368249	0.410385	0.446334	0.492188	0.536554	0.579431	0.644969	0.713814	0.778217	0.85854	0.936351	1.05796	1.24247	1.49484	2.34007	46.5994
0.0497207	0.0902773	0.128401	0.166989	0.205869	0.241762	0.263564	0.300751	0.335452	0.368388	0.410592	0.446503	0.492188	0.536765	0.579732	0.645159	0.71383	0.778217	0.858583	0.936528	1.06009	1.24424	1.49549	2.35182	46.7149
0.0497283	0.0902807	0.128419	0.167087	0.206267	0.241818	0.263966	0.300813	0.335462	0.368402	0.410709	0.447245	0.492188	0.537067	0.579983	0.645498	0.714085	0.778217	0.859344	0.937602	1.06032	1.24427	1.49693	2.42776	47.0629
0.0498613	0.0904153	0.128512	0.16716	0.206354	0.241919	0.263968	0.300956	0.335546	0.368527	0.411068	0.44841	0.492188	0.53719	0.580013	0.646272	0.714276	0.778217	0.860194	0.937802	1.06068	1.24545	1.49693	2.44298	47.2785
0.0498644	0.0904267	0.128536	0.16723	0.206503	0.242436	0.26409	0.30118	0.33564	0.368547	0.411249	0.448762	0.492631	0.537596	0.580753	0.646329	0.714291	0.778277	0.861091	0.938316	1.06321	1.25122	1.49693	2.46094	47.3821
0.0499044	0.0904918	0.128697	0.167345	0.20688	0.242446	0.264755	0.301242	0.335894	0.368686	0.411543	0.449349	0.4927	0.537645	0.581192	0.646439	0.714696	0.778659	0.86128	0.938627	1.06606	1.25372	1.49693	2.48047	47.3947
0.0499075	0.0905104	0.128721	0.167563	0.207111	0.242721	0.264873	0.301332	0.336344	0.369113	0.411586	0.449421	0.492759	0.537827	0.58157	0.646749	0.714717	0.77935	0.861374	0.939164	1.06748	1.25484	1.49693	2.49008	47.7693
0.0499408	0.0906014	0.128974	0.167619	0.207417	0.243113	0.265025	0.301517	0.336684	0.36948	0.411765	0.449965	0.493024	0.538165	0.581696	0.646761	0.714867	0.780874	0.861466	0.939242	1.06769	1.25484	1.49693	2.52959	48.2449
0.0499748	0.0906638	0.129039	0.167717	0.207421	0.243377	0.265201	0.301602	0.336839	0.369561	0.411972	0.450304	0.493122	0.538842	0.581906	0.647055	0.714979	0.781336	0.861778	0.939452	1.06932	1.25484	1.49736	2.5665	49.1969
0.0500088	0.0908244	0.12905	0.167978	0.207459	0.24339	0.265567	0.30173	0.336859	0.369739	0.412074	0.450517	0.49344	0.538986	0.581963	0.647265	0.715039	0.781563	0.86192	0.940003	1.06967	1.25484	1.49889	2.58969	49.6992
0.0500642	0.0908698	0.12914	0.168124	0.207548	0.24359	0.265715	0.302275	0.336992	0.369799	0.412142	0.45061	0.493892	0.540108	0.582173	0.647611	0.715494	0.782847	0.862554	0.941152	1.0702	1.25484	1.50156	2.58969	49.7933
0.0501319	0.0909586	0.129234	0.168224	0.20761	0.243729	0.265914	0.302295	0.337249	0.369823	0.412195	0.450727	0.494079	0.540176	0.58218	0.648163	0.716175	0.782871	0.863762	0.941277	1.07044	1.25484	1.50438	2.6035	49.8973
0.0501319	0.0910318	0.129301	0.168372	0.208368	0.244084	0.266066	0.302411	0.337304	0.369995	0.41233	0.450755	0.494283	0.540834	0.583135	0.648381	0.716547	0.782993	0.863901	0.943104	1.07063	1.25484	1.50501	2.69175	51.0495
0.0501868	0.0910697	0.129322	0.168386	0.208849	0.244098	0.266098	0.302436	0.337574	0.370027	0.412885	0.450926	0.49429	0.540891	0.583185	0.649287	0.716623	0.78388	0.863978	0.94342	1.07405	1.25484	1.50881	2.71819	51.0982
0.0501882	0.0912401	0.129745	0.168461	0.208972	0.244347	0.266156	0.30245	0.337785	0.370129	0.414048	0.450967	0.494454	0.540902	0.583925	0.64957	0.717212	0.784385	0.865246	0.944373	1.07792	1.25542	1.51097	2.77325	51.6161
0.0502236	0.0912913	0.129894	0.168689	0.209098	0.244661	0.266745	0.302795	0.33791	0.371167	0.414125	0.450988	0.494502	0.540956	0.58411	0.649885	0.71748	0.784391	0.865614	0.945461	1.07813	1.25565	1.51359	2.80633	52.3826
0.0502288	0.0913804	0.129954	0.168742	0.209108	0.244693	0.267324	0.302832	0.337929	0.371395	0.414153	0.451803	0.494902	0.541513	0.584123	0.649906	0.718235	0.784393	0.865885	0.945572	1.08141	1.25708	1.51384	2.8607	53.1459
0.0502382	0.0914105	0.130026	0.168795	0.209196	0.244919	0.26806	0.302922	0.338115	0.371418	0.414334	0.451844	0.495049	0.541897	0.584209	0.65011	0.719022	0.784393	0.867627	0.946016	1.08149	1.25755	1.51702	3.05208	53.3201
0.050275	0.0914732	0.130048	0.168857	0.209319	0.245673	0.268352	0.303216	0.338174	0.37152	0.414358	0.452103	0.49544	0.541972	0.584328	0.650115	0.719389	0.785023	0.867888	0.946087	1.08893	1.25829	1.52298	3.17678	55.2515
0.050287	0.091545	0.130234	0.169184	0.209374	0.24591	0.268449	0.303251	0.33827	0.371602	0.414617	0.45229	0.496094	0.542059	0.584582	0.650593	0.719445	0.785041	0.868601	0.946246	1.08895	1.26197	1.53414	3.31001	55.9468
0.0503194	0.0915988	0.130263	0.169394	0.209771	0.246094	0.268678	0.303304	0.33844	0.371959	0.415313	0.4523	0.496094	0.542149	0.585113	0.650602	0.720611	0.785398	0.868729	0.946704	1.09004	1.26237	1.53942	3.48499	56.1031
0.0504717	0.091672	0.130307	0.169474	0.21027	0.246094	0.268757	0.303462	0.338643	0.372561	0.415588	0.452354	0.496094	0.542167	0.585622	0.650649	0.720669	0.785714	0.869038	0.947557	1.09042	1.26364	1.54502	3.50498	56.2924
0.05048	0.0917537	0.130368	0.169617	0.210466	0.246094	0.268825	0.303486	0.339379	0.37308	0.416053	0.452393	0.496094	0.542579	0.585933	0.65089	0.721682	0.785981	0.869505	0.947953	1.09482	1.26368	1.54678	3.53544	56.4866
0.0504818	0.0919009	0.130478	0.169628	0.210523	0.246094	0.268865	0.303731	0.339665	0.373189	0.416074	0.452464	0.496094	0.542654	0.586123	0.651002	0.721744	0.786266	0.869914	0.948335	1.09515	1.26764	1.54769	3.5948	57.7891
0.0504996	0.0919841	0.1305	0.169776	0.210546	0.246094	0.268875	0.303736	0.339929	0.373281	0.416559	0.452502	0.496459	0.542964	0.586778	0.651414	0.722006	0.78677	0.870007	0.948661	1.09601	1.26891	1.55183	3.68477	57.913
0.0505034	0.0920375	0.130676	0.169861	0.210715	0.246094	0.268918	0.303856	0.340132	0.373348	0.416677	0.453068	0.496751	0.54299	0.586887	0.65143	0.722122	0.787157	0.870073	0.950937	1.09884	1.26996	1.55403	3.83637	57.969
0.0506017	0.0920636	0.130815	0.170005	0.210779	0.246094	0.269055	0.304082	0.340188	0.37365	0.416731	0.453614	0.497387	0.543008	0.586951	0.651485	0.722384	0.788336	0.870837	0.951179	1.09973	1.2753	1.55637	3.87462	58.1377
0.0506447	0.0920796	0.130861	0.170227	0.210906	0.246094	0.269211	0.304085	0.340244	0.373726	0.416736	0.45381	0.497548	0.543647	0.587353	0.651602	0.7224	0.788568	0.871062	0.951381	1.10041	1.27619	1.55643	3.97649	58.2151
0.0507055	0.0921877	0.130888	0.17042	0.211008	0.246094	0.269309	0.304132	0.340339	0.373869	0.416936	0.453903	0.497682	0.543769	0.587614	0.651768	0.722503	0.788955	0.871585	0.95146	1.10056	1.27622	1.56103	4.02537	58.3706
0.0507486	0.0922527	0.130904	0.170495	0.211054	0.246094	0.269342	0.304209	0.340348	0.373923	0.416982	0.454152	0.498071	0.544378	0.587701	0.65204	0.722505	0.789156	0.871695	0.952237	1.10056	1.27876	1.56661	4.08583	58.5663
0.0507581	0.0922829	0.130923	0.170608	0.211081	0.246094	0.269364	0.304295	0.340539	0.374192	0.417345	0.454662	0.498521	0.545518	0.5881	0.652047	0.722508	0.790191	0.872556	0.953837	1.10196	1.2807	1.56689	4.40828	58.7215
0.0507723	0.0922852	0.130938	0.170617	0.211208	0.246094	0.269497	0.304412	0.340562	0.374444	0.417351	0.454922	0.498531	0.545617	0.588863	0.652131	0.722796	0.790773	0.872884	0.954958	1.10266	1.28211	1.57018	4.47714	58.7479
0.0507915	0.0923217	0.131081	0.170786	0.211227	0.246094	0.269655	0.304562	0.340644	0.374728	0.417495	0.4552	0.498586	0.545625	0.588942	0.652167	0.723399	0.791006	0.873144	0.957741	1.10289	1.28253	1.57407	4.48309	59.1391
0.050819	0.0923926	0.131082	0.170859	0.211317	0.246094	0.269765	0.305129	0.340797	0.374789	0.417694	0.455353	0.499005	0.54567	0.589505	0.652194	0.724074	0.791374	0.873335	0.959909	1.10334	1.28595	1.57577	4.57376	59.2563
0.0508297	0.0923967	0.131253	0.170886	0.211407	0.246094	0.270409	0.305564	0.341051	0.374957	0.417704	0.455546	0.499064	0.54588	0.590397	0.652348	0.724091	0.791651	0.873635	0.960349	1.10364	1.28668	1.57579	4.63036	59.3346
0.0508779	0.0924085	0.131448	0.171057	0.211443	0.246094	0.270796	0.305715	0.341359	0.375091	0.418118	0.456042	0.49911	0.54598	0.590459	0.652653	0.724304	0.792396	0.874094	0.96052	1.1054	1.28905	1.58369	4.72068	60.1868
0.0508862	0.0926468	0.131873	0.171099	0.211686	0.246094	0.270869	0.305731	0.341438	0.375206	0.418676	0.456394	0.499274	0.546362	0.590907	0.653462	0.72442	0.792399	0.874095	0.961075	1.10549	1.29051	1.58416	4.81495	60.3257
0.0509135	0.092674	0.13189	0.171288	0.211696	0.246094	0.271059	0.306139	0.341587	0.375266	0.418782	0.456525	0.500206	0.547149	0.591554	0.653566	0.724693	0.792634	0.875067	0.961248	1.10636	1.29347	1.58748	4.83974	61.4854
0.050942	0.0927718	0.131994	0.171686	0.21183	0.246094	0.271082	0.306386	0.341851	0.375785	0.418819	0.456906	0.500276	0.547446	0.591835	0.654145	0.724967	0.793576	0.875574	0.962357	1.10913	1.29367	1.60031	4.92889	62.0418
0.0510277	0.0929956	0.132073	0.171731	0.211988	0.246094	0.271186	0.306573	0.342038	0.375844	0.418964	0.457335	0.500493	0.54752	0.592067	0.654292	0.725668	0.793811	0.876145	0.96489	1.10985	1.29424	1.60217	4.93854	63.0531
0.0511125	0.0930514	0.132244	0.171799	0.21199	0.246094	0.271834	0.306866	0.342558	0.375918	0.418982	0.457511	0.500523	0.547704	0.592244	0.655087	0.725796	0.794636	0.876948	0.965457	1.11004	1.2973	1.60371	4.96235	63.267
0.0512001	0.0932656	0.13225	0.172147	0.212042	0.246094	0.271899	0.306904	0.342791	0.375962	0.419197	0.45779	0.500711	0.547909	0.59248	0.656132	0.726253	0.794728	0.877387	0.966504	1.11093	1.30137	1.60377	5.01239	66.8579
0.0512154	0.0932695	0.13231	0.172248	0.212249	0.246094	0.272026	0.306958	0.343061	0.376154	0.419307	0.457877	0.500845	0.548105	0.592663	0.656375	0.726489	0.795109	0.878463	0.966927	1.11259	1.30262	1.60747	5.02306	70.6733
0.0512745	0.0932756	0.13239	0.172327	0.212342	0.246094	0.272088	0.306959	0.343239	0.376442	0.419336	0.458007	0.500911	0.548392	0.592846	0.656957	0.727047	0.795596	0.87861	0.969642	1.11346	1.30451	1.60781	5.16784	73.6725
0.0513015	0.0933699	0.132409	0.172399	0.212354	0.246094	0.272093	0.307007	0.343282	0.376496	0.419446	0.458027	0.501059	0.548416	0.59304	0.656994	0.727598	0.796352	0.879141	0.96974	1.11437	1.30462	1.61012	5.23708	75.9528
0.0513105	0.0934765	0.132418	0.172542	0.21248	0.246094	0.272356	0.307057	0.343481	0.376833	0.419597	0.458276	0.501099	0.548463	0.59383	0.657503	0.72782	0.796521	0.879884	0.970374	1.11461	1.30579	1.61348	5.3506	77.8088
0.0513105	0.0935581	0.132481	0.1726	0.21257	0.246094	0.272393	0.307121	0.343602	0.377594	0.419878	0.45879	0.501353	0.548563	0.59409	0.658204	0.727851	0.796969	0.881029	0.970381	1.11465	1.31285	1.61357	6.12231	79.1187
0.0514756	0.0936649	0.13279	0.172612	0.212594	0.246094	0.272592	0.307439	0.343722	0.378102	0.419916	0.458836	0.501517	0.549188	0.594229	0.65837	0.727903	0.796995	0.881334	0.970413	1.11521	1.31475	1.61669	6.12551	89.4898
0.051483	0.093679	0.132943	0.172676	0.212666	0.246094	0.272668	0.307672	0.343816	0.378507	0.420151	0.45903	0.501658	0.549694	0.594252	0.658618	0.728031	0.797196	0.881434	0.971661	1.11563	1.3175	1.62022	6.18544	92.152
0.0516015	0.0937011	0.133102	0.172724	0.21275	0.246094	0.272892	0.307678	0.343867	0.379153	0.420271	0.459331	0.501862	0.549838	0.594281	0.658914	0.728105	0.797251	0.88163	0.972498	1.11664	1.32163	1.62236	6.2196	92.4871
0.0516124	0.0937129	0.133142	0.172734	0.212893	0.246094	0.27335	0.307753	0.343935	0.379362	0.420545	0.45941	0.502554	0.550021	0.594361	0.658978	0.728315	0.797536	0.88172	0.973035	1.11757	1.32204	1.62349	6.53364	93.7264
0.0516165	0.0938248	0.133227	0.172734	0.212915	0.246094	0.273577	0.307829	0.344177	0.379654	0.420615	0.459566	0.50266	0.550282	0.594577	0.659083	0.728442	0.798801	0.882182	0.973797	1.11802	1.32233	1.63594	7.71741	93.7511
0.0516785	0.0938377	0.133261	0.173179	0.212924	0.246094	0.2736	0.307834	0.34447	0.379801	0.420707	0.459902	0.503101	0.550282	0.594707	0.659974	0.729116	0.800206	0.882591	0.974412	1.11806	1.32285	1.63921	8.16403	93.8035
0.051685	0.0939081	0.13333	0.173682	0.213127	0.246094	0.273744	0.30827	0.344607	0.379841	0.420934	0.459952	0.503205	0.550282	0.595096	0.660471	0.72931	0.800959	0.884032	0.976883	1.11806	1.32318	1.64462	8.57586
0.0517682	0.0939139	0.133419	0.173944	0.213435	0.246094	0.273921	0.308457	0.344621	0.380197	0.420949	0.460385	0.503341	0.550282	0.595233	0.660798	0.730539	0.801099	0.884857	0.97713	1.12186	1.32368	1.64514	8.79404
0.0517754	0.093976	0.133594	0.174306	0.213449	0.246094	0.274188	0.308563	0.34491	0.380301	0.421012	0.461007	0.503675	0.550282	0.595342	0.661554	0.730911	0.801151	0.884877	0.979683	1.12539	1.32444	1.64669	9.67281
0.0518671	0.0939764	0.133609	0.174521	0.21354	0.246094	0.274225	0.308907	0.344977	0.380427	0.421252	0.461287	0.503721	0.550282	0.595458	0.662079	0.732908	0.801529	0.885217	0.982132	1.12544	1.32526	1.64839	9.96424
0.0518804	0.0940127	0.133609	0.174554	0.213556	0.246094	0.274486	0.309103	0.345129	0.380576	0.421356	0.461334	0.503823	0.550282	0.596561	0.662746	0.733644	0.801987	0.885418	0.984095	1.12666	1.32526	1.65085	10.318
0.0518927	0.0940161	0.133631	0.174603	0.213826	0.246094	0.274626	0.30927	0.34523	0.381113	0.421514	0.461727	0.503853	0.550282	0.59711	0.662806	0.733834	0.801991	0.886558	0.984277	1.12775	1.32526	1.65305	11.0179
0.0518949	0.0940533	0.133689	0.174681	0.213853	0.246094	0.274848	0.309606	0.345355	0.381142	0.421583	0.461899	0.503859	0.550282	0.597279	0.663142	0.734315	0.802081	0.887015	0.984375	1.12947	1.32824	1.65389	11.1416
0.0519964	0.0940608	0.13376	0.174873	0.213893	0.246094	0.274945	0.309815	0.345443	0.38115	0.422265	0.46202	0.504502	0.550282	0.598191	0.664125	0.734367	0.802292	0.887304	0.984375	1.13289	1.33171	1.66094	11.7343
0.0520001	0.0941116	0.133804	0.174905	0.214165	0.246094	0.27502	0.310112	0.345603	0.381761	0.422611	0.462107	0.504868	0.550282	0.598736	0.664235	0.735439	0.802461	0.887304	0.984375	1.13394	1.33249	1.67084	12.0959
0.0520082	0.094137	0.133875	0.175039	0.214231	0.246094	0.27512	0.310342	0.345806	0.381849	0.423048	0.462137	0.505312	0.550282	0.599523	0.664718	0.735874	0.802991	0.887304	0.984375	1.13564	1.33464	1.67267	12.2152
0.0520773	0.0944959	0.134217	0.175335	0.214383	0.246094	0.275361	0.310848	0.345859	0.381879	0.423129	0.462186	0.505468	0.550282	0.599563	0.665121	0.735983	0.803013	0.887304	0.98714	1.13731	1.33503	1.68233	12.8082
0.0521423	0.0945065	0.134264	0.175365	0.214413	0.246094	0.275457	0.310896	0.346081	0.381945	0.423332	0.462816	0.505544	0.550282	0.600534	0.665254	0.736141	0.804169	0.887304	0.98714	1.14121	1.33556	1.68703	12.9008
0.0521964	0.0945859	0.134294	0.17538	0.21449	0.246094	0.275466	0.31095	0.346146	0.382337	0.423411	0.463058	0.505645	0.550282	0.6018	0.665713	0.736309	0.804463	0.887304	0.987399	1.14271	1.33577	1.68782	13.5052
0.0522044	0.0946099	0.134457	0.175494	0.214561	0.246094	0.276285	0.311552	0.346487	0.382542	0.423826	0.463283	0.505781	0.550364	0.601931	0.665743	0.73657	0.804901	0.887304	0.990004	1.14293	1.33939	1.69647	13.6629
0.0522928	0.0946378	0.134465	0.175701	0.214884	0.246094	0.276298	0.311662	0.346736	0.382807	0.424061	0.463651	0.506059	0.550562	0.602317	0.666236	0.737206	0.805193	0.887304	0.991659	1.1433	1.34348	1.71263	13.7811
0.0522951	0.0946502	0.134555	0.175759	0.215321	0.246094	0.276533	0.311931	0.347274	0.383118	0.424202	0.463672	0.506329	0.55059	0.602539	0.666473	0.73756	0.805446	0.887311	0.992188	1.14412	1.34456	1.72266	13.8102
0.0523777	0.0947274	0.134593	0.175915	0.215529	0.24612	0.277203	0.31225	0.347367	0.383354	0.424282	0.463791	0.50646	0.550948	0.602718	0.666676	0.738281	0.806149	0.888872	0.994557	1.14497	1.34473	1.72266	13.8959
0.0525439	0.0948391	0.134772	0.175929	0.21553	0.246244	0.277585	0.312344	0.347441	0.383807	0.424743	0.464183	0.506526	0.551594	0.602905	0.667386	0.738281	0.806175	0.889153	0.994636	1.14508	1.34986	1.73379	14.406
0.0525969	0.0948552	0.134796	0.175975	0.215738	0.246262	0.277674	0.312619	0.347739	0.38383	0.424754	0.464324	0.507019	0.552749	0.603045	0.668152	0.738281	0.806833	0.889169	0.995838	1.14603	1.35445	1.73633	14.4568
0.0526862	0.0948695	0.134914	0.176131	0.215801	0.246443	0.277795	0.313103	0.347852	0.384086	0.424794	0.46455	0.507144	0.553076	0.603501	0.668263	0.738281	0.806839	0.88973	0.997247	1.14603	1.35589	1.73633	14.4664
0.0527946	0.0949205	0.135078	0.176185	0.216052	0.246492	0.278571	0.313207	0.347881	0.384302	0.424843	0.464603	0.507228	0.553568	0.604101	0.668743	0.738281	0.807034	0.88988	0.997897	1.14821	1.35631	1.74015	14.6982
0.0528118	0.0949381	0.135138	0.176268	0.216077	0.246753	0.279041	0.313218	0.347889	0.384706	0.425222	0.464691	0.507251	0.553767	0.604129	0.669424	0.738281	0.807233	0.890137	0.998786	1.14964	1.35897	1.74015	14.7374
0.0528994	0.0949674	0.135231	0.176473	0.216198	0.24701	0.279144	0.313281	0.348029	0.38473	0.425547	0.464809	0.507672	0.553829	0.604779	0.66955	0.738281	0.807399	0.890166	0.99907	1.1515	1.36124	1.74485	14.9405
0.0529276	0.0949961	0.135293	0.176498	0.216786	0.247025	0.279352	0.313756	0.348029	0.38496	0.425958	0.46482	0.508143	0.5542	0.604827	0.669843	0.738281	0.807405	0.890315	0.999335	1.15615	1.36281	1.75396	15.2604
0.0529315	0.09506	0.135352	0.17653	0.216801	0.247206	0.279469	0.31402	0.348029	0.385087	0.426118	0.464966	0.508469	0.55465	0.605094	0.670418	0.738281	0.807794	0.891047	1.00111	1.15653	1.36408	1.75477	15.8408
0.0529907	0.0950885	0.135367	0.176545	0.216882	0.24721	0.27957	0.314094	0.348029	0.385105	0.426296	0.464979	0.509224	0.55465	0.605184	0.671086	0.738281	0.807916	0.891227	1.00139	1.15686	1.36538	1.75641	15.9985
0.0529932	0.0952243	0.135454	0.176597	0.216922	0.247337	0.279863	0.314273	0.348029	0.385108	0.426301	0.465145	0.50923	0.55465	0.605205	0.671344	0.738781	0.809168	0.891535	1.00199	1.15905	1.36883	1.76478	16.0452
0.0529995	0.0952508	0.13552	0.176723	0.217018	0.247434	0.279877	0.314288	0.348029	0.385342	0.426303	0.465269	0.509287	0.55465	0.605253	0.672271	0.738839	0.809572	0.893071	1.00319	1.15972	1.37099	1.76594	16.5798
0.0530025	0.0952558	0.135564	0.176811	0.217223	0.247435	0.279999	0.314361	0.348029	0.38604	0.426457	0.465283	0.509357	0.55465	0.60543	0.672279	0.739228	0.810323	0.893121	1.00344	1.16023	1.37262	1.78038	16.9835
0.0530475	0.095396	0.135573	0.176826	0.217302	0.247506	0.280327	0.31494	0.348029	0.38608	0.426644	0.465336	0.509395	0.55465	0.605449	0.672638	0.739783	0.811423	0.893934	1.00427	1.16028	1.37375	1.79159	17.3786
0.0530975	0.0956132	0.135635	0.177178	0.217336	0.247527	0.280528	0.315025	0.348029	0.386289	0.42689	0.465401	0.509485	0.55465	0.60567	0.673148	0.739862	0.812073	0.894346	1.0044	1.16044	1.37535	1.79276	17.7217
0.0531399	0.0956406	0.135776	0.177241	0.217498	0.247571	0.280896	0.315248	0.348029	0.386534	0.426986	0.465502	0.50996	0.554695	0.605959	0.673587	0.740415	0.812396	0.894346	1.00551	1.16052	1.37734	1.80646	17.8174
0.0531735	0.0959057	0.135818	0.177498	0.217634	0.247599	0.281055	0.315395	0.348029	0.386601	0.42713	0.466171	0.51003	0.555387	0.606442	0.674012	0.740805	0.813147	0.894465	1.00753	1.16115	1.3782	1.81762	18.1905
0.0532001	0.0959154	0.135879	0.177592	0.217642	0.247666	0.28147	0.315819	0.348029	0.386991	0.427215	0.466243	0.510151	0.555636	0.606575	0.67407	0.742083	0.8135	0.895536	1.00798	1.16162	1.37825	1.81965	18.3381
0.053215	0.0960587	0.136068	0.177692	0.217768	0.247769	0.281512	0.316076	0.348029	0.387354	0.427278	0.466269	0.510966	0.555653	0.606842	0.674626	0.742773	0.813514	0.896525	1.01056	1.16169	1.37888	1.82612	19.4254
0.053224	0.0961433	0.136255	0.177694	0.218359	0.248011	0.281608	0.316463	0.348029	0.387435	0.427364	0.46644	0.511035	0.556237	0.60724	0.674717	0.742862	0.814104	0.896556	1.0112	1.16224	1.37957	1.82695	19.9291
0.0532843	0.0961564	0.136888	0.177784	0.218416	0.248047	0.281627	0.316521	0.348029	0.387583	0.427395	0.466913	0.511069	0.556361	0.607597	0.675026	0.743294	0.814235	0.896646	1.01172	1.16281	1.37973	1.84433	21.6382
0.0532912	0.0961885	0.13692	0.177809	0.218513	0.248047	0.282059	0.316674	0.348029	0.38759	0.42743	0.467016	0.511151	0.556719	0.607661	0.676511	0.743471	0.814352	0.896878	1.01366	1.16366	1.38317	1.84649	22.7444
0.0533088	0.0962038	0.136988	0.177843	0.218524	0.248047	0.282421	0.316962	0.348029	0.387663	0.427497	0.467043	0.511539	0.55672	0.607899	0.676987	0.743774	0.814366	0.897425	1.01467	1.16398	1.38875	1.84756	27.186
0.0533361	0.0963397	0.137033	0.178046	0.218558	0.248047	0.282473	0.317073	0.348029	0.387713	0.427563	0.467102	0.511728	0.557019	0.608612	0.677411	0.744141	0.814727	0.897539	1.01467	1.16414	1.38933	1.85617	27.4822
0.0533476	0.0964212	0.13718	0.178092	0.218602	0.248047	0.282614	0.317513	0.348029	0.388099	0.42796	0.467152	0.512007	0.557086	0.60911	0.677782	0.744315	0.815211	0.898721	1.01467	1.16435	1.39305	1.87152	27.7382
0.0533621	0.0964231	0.13759	0.178256	0.218609	0.248047	0.283023	0.317829	0.34832	0.388135	0.428423	0.467526	0.51201	0.557335	0.609604	0.677936	0.744849	0.815558	0.898976	1.01467	1.16541	1.39476	1.87419	28.2021
0.0533896	0.0965288	0.137631	0.178321	0.218755	0.248047	0.283085	0.317844	0.348374	0.388565	0.428463	0.467551	0.512401	0.557426	0.609927	0.678872	0.745232	0.816229	0.899261	1.01467	1.1662	1.3969	1.88536	29.1832
0.0534059	0.0965473	0.137649	0.178435	0.219062	0.248047	0.283345	0.318008	0.348597	0.388717	0.428472	0.468365	0.512547	0.557788	0.610242	0.678924	0.745235	0.816337	0.899308	1.01467	1.1689	1.39894	1.91582	29.3828
0.0534301	0.0965875	0.137922	0.178447	0.219257	0.248047	0.283593	0.318101	0.348704	0.389193	0.428486	0.468838	0.512704	0.557808	0.610506	0.679223	0.745684	0.818238	0.899653	1.01467	1.169	1.39976	1.94345	29.6222
0.0535037	0.0966275	0.138255	0.17858	0.219449	0.248047	0.283699	0.318225	0.349115	0.389298	0.428664	0.46916	0.512815	0.557815	0.612087	0.679345	0.746435	0.818449	0.899821	1.01574	1.16958	1.40208	1.96047	29.6704
0.0535305	0.0966817	0.138269	0.178618	0.219471	0.248047	0.283951	0.318266	0.349179	0.389519	0.428734	0.469231	0.512822	0.558293	0.612519	0.679361	0.746698	0.819105	0.900772	1.01592	1.17079	1.40332	1.96875	29.746
0.0535761	0.0967058	0.138289	0.178632	0.219473	0.248047	0.284048	0.318306	0.349414	0.38958	0.428951	0.469463	0.513083	0.5584	0.612537	0.679553	0.7469	0.819206	0.901488	1.01654	1.17139	1.40445	1.96875	29.9398
0.0536057	0.0967155	0.138425	0.17875	0.219635	0.248047	0.284183	0.31864	0.349832	0.389659	0.429146	0.470229	0.513175	0.558427	0.613	0.679817	0.747142	0.81923	0.901616	1.01706	1.17234	1.41237	1.98407	30.1538
0.0536837	0.0967212	0.138469	0.178997	0.219637	0.248047	0.284453	0.318657	0.349974	0.389681	0.429587	0.470289	0.513862	0.559015	0.613072	0.679854	0.747145	0.819573	0.902165	1.01904	1.178	1.41304	1.98407	30.5863
0.053723	0.096745	0.138635	0.179021	0.220071	0.248047	0.284527	0.318709	0.350076	0.3901	0.429693	0.470576	0.513983	0.559115	0.61312	0.67998	0.747607	0.81959	0.905526	1.02079	1.17984	1.41549	1.98407	30.7923
0.0537477	0.0968735	0.139309	0.179202	0.220194	0.248047	0.284601	0.318739	0.35008	0.390153	0.429705	0.471024	0.514118	0.559264	0.613352	0.680568	0.747731	0.820138	0.905653	1.02114	1.18528	1.41717	1.98407	30.7929
0.0537799	0.0968747	0.13934	0.179407	0.220202	0.248047	0.284806	0.318781	0.350438	0.390184	0.430417	0.471362	0.514304	0.559494	0.614145	0.680685	0.747868	0.820412	0.90667	1.02272	1.1871	1.42181	1.98757	30.8776
0.0538075	0.096927	0.139401	0.179549	0.220205	0.248047	0.284821	0.318891	0.350581	0.390212	0.430495	0.471478	0.514573	0.559531	0.614453	0.681108	0.748465	0.820527	0.906898	1.02272	1.19187	1.4243	1.9877	30.8776
0.0538324	0.096961	0.139479	0.180019	0.22021	0.248047	0.284924	0.319084	0.350681	0.390233	0.430521	0.471755	0.515193	0.559687	0.614517	0.681304	0.748937	0.82062	0.907667	1.02774	1.19244	1.42564	1.99185	31.1099
0.0538525	0.0969891	0.139518	0.180032	0.220388	0.248047	0.285047	0.319366	0.350791	0.390425	0.430567	0.472554	0.51537	0.559998	0.614918	0.682856	0.749098	0.820988	0.907997	1.02784	1.19266	1.42622	2.00881	31.2686
0.0538728	0.0971327	0.139543	0.180225	0.220423	0.248047	0.285097	0.319453	0.350791	0.390562	0.43101	0.472796	0.515663	0.560183	0.614964	0.682886	0.749833	0.82148	0.908027	1.02875	1.19343	1.42731	2.03071	31.3326
0.0539414	0.0971472	0.139577	0.180225	0.220491	0.248078	0.285141	0.31951	0.351156	0.390612	0.43108	0.472826	0.515735	0.560241	0.615843	0.682958	0.750025	0.822894	0.908565	1.02876	1.19753	1.42826	2.03686	31.4638
0.0539815	0.0972635	0.139634	0.180269	0.220651	0.248084	0.285236	0.319697	0.351542	0.39069	0.431186	0.473624	0.515763	0.560246	0.616224	0.683022	0.750696	0.823061	0.90878	1.02915	1.20005	1.43004	2.07129	31.5322
0.0540287	0.0972802	0.13982	0.180273	0.221067	0.248181	0.285338	0.319853	0.351756	0.390851	0.431854	0.47367	0.516198	0.56094	0.616435	0.683201	0.751601	0.823229	0.908927	1.02953	1.20076	1.43056	2.07604	31.5361
0.0540624	0.0972841	0.13985	0.180601	0.221159	0.248196	0.285491	0.320055	0.351794	0.391172	0.432048	0.473749	0.517181	0.561028	0.616471	0.683283	0.75228	0.824551	0.911169	1.03012	1.20232	1.43251	2.07728	31.5576
0.0541586	0.0972859	0.139886	0.180645	0.221226	0.248284	0.285786	0.320126	0.351973	0.39119	0.432148	0.473779	0.517539	0.562137	0.616622	0.68378	0.752858	0.824653	0.911283	1.03068	1.20337	1.43496	2.09279	31.6111
0.0542056	0.0973116	0.139923	0.180992	0.221404	0.248565	0.285799	0.320225	0.352432	0.391555	0.432261	0.47437	0.518137	0.562241	0.616649	0.683788	0.753045	0.824974	0.911335	1.03072	1.20823	1.43496	2.09714	31.7703
0.0542062	0.0973691	0.140003	0.181012	0.221607	0.248587	0.286399	0.32089	0.352599	0.391909	0.432353	0.475053	0.518452	0.562431	0.616831	0.684139	0.753985	0.825506	0.913055	1.03103	1.20985	1.4407	2.11698	31.8941
0.0542986	0.0974935	0.140055	0.181084	0.221609	0.248673	0.286544	0.320938	0.352669	0.392082	0.43238	0.475092	0.518509	0.562736	0.617193	0.684283	0.75416	0.825559	0.91403	1.03189	1.21579	1.44194	2.13378	32.0057
0.054418	0.0975349	0.140235	0.181288	0.221676	0.248903	0.286613	0.321136	0.352695	0.39225	0.432514	0.475213	0.519133	0.562954	0.617427	0.684371	0.755392	0.825573	0.914126	1.03504	1.22065	1.4446	2.14878	32.0586
0.0544543	0.0976042	0.140237	0.181463	0.22178	0.248959	0.286643	0.321556	0.352704	0.392258	0.433045	0.475261	0.519452	0.563088	0.617586	0.684972	0.757627	0.826169	0.914214	1.03525	1.22093	1.44519	2.15991	32.1276
0.0544964	0.0976767	0.140272	0.181676	0.221784	0.24925	0.286672	0.321754	0.352907	0.392728	0.433519	0.475363	0.52	0.56341	0.618328	0.685041	0.757732	0.826957	0.916103	1.03559	1.22697	1.45638	2.16258	32.3704
0.0545377	0.0976786	0.14036	0.181706	0.221894	0.249567	0.286709	0.321835	0.352926	0.392751	0.433556	0.476068	0.520862	0.563684	0.618351	0.685649	0.75778	0.826969	0.916399	1.03733	1.22791	1.45788	2.16597	32.9688
0.0545547	0.0978006	0.140459	0.181924	0.222086	0.249576	0.286932	0.3219	0.352943	0.39406	0.433745	0.476253	0.520949	0.563743	0.618448	0.685987	0.758366	0.827175	0.916775	1.0377	1.22908	1.46163	2.20113	33.1529
0.0545632	0.0978223	0.140581	0.181985	0.222132	0.249993	0.287297	0.322047	0.353113	0.394065	0.43398	0.476441	0.521287	0.564237	0.618758	0.686778	0.758761	0.827661	0.916792	1.03831	1.22953	1.46579	2.21062	33.3248
0.054571	0.0978266	0.14059	0.182022	0.222614	0.25009	0.287316	0.322208	0.353231	0.394191	0.43404	0.476527	0.521388	0.564239	0.6188	0.686928	0.759547	0.828133	0.917154	1.03837	1.22979	1.46928	2.21484	34.6133
0.0546363	0.0978517	0.14059	0.182135	0.222741	0.250209	0.287513	0.322344	0.353625	0.394359	0.434786	0.476692	0.521401	0.565079	0.61881	0.687344	0.759734	0.828392	0.917862	1.03941	1.23047	1.47252	2.21484	35.0204
0.0546431	0.0979865	0.140791	0.18221	0.222771	0.250344	0.288118	0.322478	0.35377	0.394555	0.434797	0.476776	0.521497	0.565134	0.619796	0.687611	0.759783	0.828487	0.918448	1.04058	1.23047	1.47545	2.22847	36.0734
0.0546701	0.0980307	0.140808	0.18228	0.222835	0.250781	0.288149	0.32284	0.354036	0.395226	0.434868	0.476843	0.521882	0.56544	0.620637	0.687706	0.760036	0.829093	0.918616	1.04272	1.23047	1.4759	2.26034	36.953
0.0546841	0.0981818	0.140838	0.182375	0.223129	0.251053	0.288185	0.322851	0.35421	0.39561	0.435335	0.47694	0.522185	0.565446	0.620847	0.68772	0.760068	0.829294	0.919498	1.04302	1.23047	1.47656	2.2706	37.4914
0.0549313	0.098211	0.140844	0.182397	0.223253	0.251186	0.288207	0.323091	0.35427	0.395812	0.435335	0.477298	0.52235	0.565859	0.621431	0.68782	0.760865	0.830079	0.919835	1.04331	1.23047	1.47656	2.28931	37.9406
0.0550042	0.0982233	0.140914	0.182419	0.223272	0.251282	0.288321	0.323273	0.354305	0.396726	0.435595	0.47759	0.52238	0.565863	0.621752	0.687974	0.760999	0.830938	0.920396	1.04603	1.23047	1.47793	2.31489	38.3209
0.0550282	0.0982535	0.140922	0.182421	0.223617	0.251531	0.288422	0.323273	0.354439	0.396753	0.435705	0.477993	0.522641	0.56597	0.621968	0.688879	0.762653	0.831049	0.922091	1.04625	1.23047	1.48828	2.31697	39.2489
0.0550282	0.0982581	0.141068	0.182444	0.223731	0.25166	0.288424	0.323572	0.354568	0.396826	0.435719	0.478007	0.522806	0.566323	0.622439	0.688996	0.763048	0.831618	0.922118	1.05036	1.23047	1.49088	2.31861	39.5258
0.0550772	0.0983003	0.141361	0.182605	0.223987	0.251754	0.28857	0.323885	0.354748	0.396881	0.435744	0.47831	0.523354	0.566714	0.622447	0.689086	0.763222	0.832754	0.9228	1.05059	1.23128	1.49099	2.34007	40.4796
0.0551114	0.0983907	0.141372	0.18277	0.224069	0.251988	0.288641	0.324083	0.354876	0.397192	0.435859	0.478542	0.523513	0.567194	0.623379	0.689089	0.76337	0.832785	0.923516	1.05078	1.23143	1.49222	2.3706	40.849
0.0552328	0.0985685	0.141583	0.182788	0.224131	0.252006	0.289014	0.324117	0.355202	0.397197	0.437037	0.478721	0.52367	0.567331	0.623414	0.689354	0.763455	0.832832	0.925541	1.05105	1.23278	1.49366	2.42776	40.9793
0.055276	0.0986688	0.141631	0.182887	0.224335	0.252314	0.28908	0.324381	0.35553	0.397485	0.437085	0.478995	0.523855	0.567984	0.623602	0.689763	0.763684	0.833207	0.925762	1.05117	1.23299	1.49507	2.44298	41.7223
0.0553095	0.098728	0.14165	0.183005	0.224406	0.252525	0.289144	0.324661	0.355738	0.397794	0.437109	0.479073	0.52416	0.568209	0.624306	0.690007	0.764187	0.833281	0.926545	1.05153	1.23339	1.49617	2.44619	41.8576
0.0553295	0.0987428	0.14165	0.183086	0.22459	0.252528	0.289148	0.324928	0.355802	0.398193	0.437178	0.479522	0.52429	0.568248	0.624363	0.690045	0.764554	0.833395	0.927374	1.05301	1.23679	1.49693	2.45626	42.8795
0.0554079	0.098781	0.1417	0.183161	0.225268	0.252648	0.289428	0.325066	0.356109	0.398577	0.437279	0.479708	0.52474	0.56843	0.624579	0.690274	0.764784	0.833882	0.928413	1.0531	1.24761	1.49693	2.46094	43.2432
0.0554292	0.0988128	0.14189	0.183317	0.225273	0.252857	0.289749	0.325152	0.3565	0.398696	0.43775	0.47977	0.524799	0.568438	0.624693	0.690323	0.765241	0.834386	0.928813	1.05492	1.24794	1.49693	2.48047	43.3092
0.055445	0.0990034	0.142029	0.183585	0.225322	0.253099	0.289771	0.325192	0.356555	0.398742	0.437799	0.480379	0.524926	0.568718	0.624872	0.690555	0.765464	0.834502	0.92952	1.05545	1.25233	1.49693	2.51753	43.3163
0.0555085	0.0991868	0.142172	0.183596	0.225346	0.253288	0.289887	0.325248	0.356572	0.398769	0.437855	0.480685	0.52504	0.569047	0.625792	0.690569	0.765499	0.834709	0.930026	1.05568	1.25292	1.49865	2.52959	43.6985
0.0555823	0.0992991	0.142222	0.183926	0.225394	0.253428	0.289917	0.326084	0.356657	0.399129	0.43789	0.481202	0.525271	0.569081	0.626856	0.693035	0.765602	0.834842	0.930702	1.05695	1.25371	1.50004	2.58969	43.7038
0.0556875	0.0993013	0.142289	0.184018	0.225848	0.253431	0.29015	0.326203	0.356694	0.399549	0.437896	0.481336	0.525761	0.569224	0.627172	0.693675	0.765961	0.835398	0.933017	1.05726	1.25385	1.50109	2.58969	43.7732
0.0558017	0.0993186	0.142326	0.184089	0.225918	0.253433	0.290151	0.326482	0.356816	0.399609	0.438064	0.481814	0.526272	0.569483	0.628449	0.693689	0.766241	0.83559	0.934051	1.05759	1.25457	1.50225	2.61822	43.865
0.0558368	0.0994028	0.142376	0.184333	0.225958	0.253443	0.290443	0.326784	0.356852	0.399655	0.438133	0.482069	0.527049	0.569518	0.628657	0.69381	0.766286	0.835704	0.936492	1.05871	1.25484	1.50367	2.61893	44.2562
0.0559706	0.0994178	0.142447	0.184456	0.225961	0.253582	0.290494	0.326878	0.357175	0.399789	0.43828	0.482309	0.527491	0.571105	0.629095	0.694379	0.7666	0.83572	0.936701	1.06043	1.25484	1.50501	2.63677	44.2853
0.0559851	0.099439	0.14246	0.184462	0.225988	0.253635	0.290538	0.327496	0.357355	0.399796	0.438316	0.482422	0.527648	0.5712	0.629263	0.69489	0.767569	0.835732	0.937245	1.06106	1.25484	1.50881	2.71819	44.3115
0.0559863	0.0996239	0.142856	0.184464	0.226123	0.253639	0.290717	0.327831	0.357374	0.399866	0.438739	0.482454	0.527743	0.571244	0.630424	0.695103	0.767857	0.836314	0.938957	1.06128	1.25484	1.51337	2.77325	44.3203
0.0560408	0.0996736	0.142966	0.184521	0.226239	0.253697	0.290873	0.327902	0.357475	0.399908	0.438956	0.482634	0.5278	0.571587	0.630702	0.695409	0.768049	0.836764	0.93936	1.0643	1.25484	1.52111	2.82352	44.7238
0.0560474	0.0996898	0.14304	0.184585	0.226245	0.253834	0.290922	0.327958	0.357692	0.40007	0.439039	0.482672	0.527942	0.573549	0.630702	0.695671	0.768264	0.83788	0.940279	1.06476	1.25484	1.52161	3.0296	44.7694
0.0561106	0.0997141	0.143053	0.184793	0.226312	0.254102	0.291016	0.328128	0.357876	0.400509	0.439133	0.482806	0.527952	0.573985	0.630826	0.695832	0.768887	0.839	0.940459	1.06632	1.25484	1.52257	3.09858	45.1902
0.0561134	0.0998217	0.143061	0.184889	0.226361	0.254443	0.29132	0.328175	0.358085	0.400724	0.439134	0.482999	0.528031	0.574932	0.630923	0.696	0.769927	0.840506	0.94052	1.06644	1.26004	1.52723	3.23414	45.4788
0.0562416	0.0998261	0.143198	0.185102	0.226582	0.25468	0.291383	0.328356	0.35814	0.401265	0.439314	0.483056	0.52824	0.574984	0.63156	0.696058	0.77045	0.841221	0.942522	1.06788	1.2606	1.53401	3.27846	45.8381
0.0563469	0.0999038	0.143596	0.185231	0.226635	0.254759	0.291658	0.328402	0.358529	0.401352	0.439881	0.483797	0.529668	0.575485	0.631951	0.696058	0.770697	0.842914	0.943547	1.068	1.2624	1.54031	3.2934	46.0461
0.0564082	0.0999135	0.143664	0.185266	0.226979	0.255	0.291659	0.328443	0.358734	0.401457	0.439982	0.484106	0.529929	0.575934	0.63227	0.696058	0.770952	0.842958	0.943835	1.06938	1.26403	1.54184	3.31477	46.1341
0.0564361	0.0999656	0.143707	0.185629	0.227026	0.25508	0.292087	0.328638	0.358762	0.401923	0.440079	0.484371	0.530355	0.576396	0.633166	0.696058	0.771447	0.843128	0.946678	1.0733	1.26463	1.54345	3.32733	46.3392
0.0564494	0.099993	0.143776	0.185703	0.227109	0.255131	0.292143	0.328662	0.358888	0.40194	0.440192	0.484425	0.53077	0.576492	0.633808	0.696672	0.771608	0.843233	0.947652	1.07368	1.2648	1.54421	3.39421	46.9257
0.0564701	0.100088	0.143778	0.18572	0.227268	0.255351	0.29215	0.328701	0.359053	0.402452	0.440301	0.484599	0.531411	0.576928	0.633904	0.696983	0.771624	0.843531	0.947729	1.07372	1.2648	1.54434	3.51309	47.1605
0.0564947	0.100096	0.143953	0.185775	0.227326	0.255454	0.29241	0.328735	0.359231	0.402554	0.440468	0.48472	0.531774	0.577228	0.633918	0.697026	0.771653	0.844568	0.948227	1.07428	1.26522	1.54511	3.59263	47.5892
0.0565337	0.100112	0.14407	0.18578	0.227484	0.255682	0.292619	0.328923	0.359285	0.403032	0.44065	0.485155	0.532448	0.57862	0.634134	0.698577	0.7717	0.845115	0.949134	1.07623	1.26613	1.54545	3.7207	48.5013
0.0566382	0.10013	0.144279	0.18622	0.227934	0.255759	0.292629	0.329231	0.359698	0.403245	0.440716	0.485203	0.532506	0.579111	0.63418	0.698782	0.772107	0.846349	0.949833	1.0783	1.26832	1.54626	3.88184	48.7863
0.056655	0.100171	0.144406	0.186266	0.228318	0.255826	0.292696	0.329782	0.359711	0.403387	0.440735	0.485843	0.532772	0.579157	0.634803	0.698818	0.772579	0.848108	0.950062	1.08017	1.2685	1.55026	3.93458	48.8743
0.056661	0.100258	0.144466	0.186372	0.228561	0.255997	0.292976	0.329782	0.360014	0.403508	0.440887	0.486111	0.533025	0.57956	0.635174	0.699127	0.77275	0.84825	0.950098	1.08047	1.27442	1.55464	4.01173	49.0601
0.0566818	0.10035	0.144593	0.186442	0.228587	0.256068	0.293029	0.329894	0.36014	0.403517	0.441214	0.486263	0.533163	0.57992	0.635179	0.69916	0.772757	0.849229	0.952507	1.08059	1.2748	1.55643	4.08331	49.3651
0.056713	0.10041	0.144679	0.186561	0.228655	0.256215	0.293533	0.329924	0.360204	0.403519	0.441247	0.486384	0.533978	0.580169	0.635204	0.699252	0.772793	0.850998	0.952534	1.08148	1.27523	1.55643	4.13787	49.5677
0.0568442	0.100427	0.144891	0.186756	0.228678	0.256286	0.293669	0.329993	0.360257	0.403657	0.441388	0.486754	0.534493	0.580239	0.635302	0.699611	0.77329	0.851524	0.952748	1.08275	1.28026	1.55643	4.46083	49.702
0.0568993	0.100782	0.144894	0.186761	0.229087	0.256322	0.293758	0.330003	0.360327	0.40371	0.441815	0.486954	0.534714	0.581299	0.635627	0.700533	0.773599	0.851894	0.953434	1.08521	1.28193	1.55889	4.52736	50.1502
0.0568993	0.100853	0.144949	0.186805	0.229103	0.256412	0.293771	0.330068	0.361099	0.404231	0.441843	0.48727	0.535149	0.581372	0.635807	0.701089	0.773836	0.852486	0.956391	1.08522	1.28296	1.55897	4.5505	51.1269
0.0569655	0.100861	0.145016	0.186815	0.229115	0.256453	0.293848	0.330153	0.361589	0.40458	0.442029	0.488229	0.535307	0.582187	0.63589	0.701583	0.773984	0.853011	0.957229	1.08523	1.28332	1.56168	4.6958	51.7948
0.0569792	0.100928	0.145115	0.187181	0.229132	0.256663	0.293851	0.330387	0.361633	0.405568	0.442128	0.489009	0.535488	0.582222	0.635921	0.701583	0.774402	0.853138	0.957424	1.08779	1.28374	1.56487	4.71913	52.2916
0.0569815	0.100932	0.145169	0.187257	0.229191	0.256681	0.293976	0.330641	0.362574	0.405703	0.442957	0.490039	0.53555	0.582943	0.636754	0.701892	0.774482	0.853963	0.957555	1.08842	1.28496	1.56689	4.79241	52.9648
0.0571468	0.100932	0.145207	0.187324	0.22925	0.256684	0.294304	0.331074	0.362664	0.405765	0.442978	0.490363	0.535772	0.583012	0.63683	0.702471	0.775124	0.854125	0.957751	1.08877	1.28834	1.56695	4.81545	53.2625
0.0572395	0.101031	0.145253	0.187388	0.229442	0.256798	0.294459	0.331533	0.3627	0.405779	0.443021	0.490665	0.536996	0.583199	0.63726	0.7031	0.775146	0.854317	0.959765	1.09016	1.2897	1.57576	4.8172	53.7866
0.057315	0.101085	0.145283	0.18744	0.229549	0.257013	0.294791	0.331567	0.362786	0.406095	0.443201	0.49119	0.53719	0.58326	0.638689	0.703144	0.775281	0.854497	0.959977	1.09069	1.29316	1.57905	4.82147	54.0043
0.0573498	0.101367	0.145348	0.187452	0.229969	0.25711	0.29482	0.331639	0.36298	0.406308	0.44345	0.49124	0.537619	0.583779	0.639073	0.703193	0.775319	0.855304	0.960495	1.09116	1.29724	1.58216	4.88411	54.0668
0.0573695	0.101451	0.14543	0.187566	0.23015	0.257154	0.295009	0.33165	0.362988	0.406543	0.44382	0.491393	0.537764	0.583931	0.6395	0.704198	0.775492	0.855952	0.962781	1.09288	1.29911	1.58827	4.89228	54.4909
0.0574096	0.101493	0.145646	0.187702	0.230256	0.257396	0.295414	0.33181	0.363015	0.406543	0.443898	0.492188	0.538046	0.584245	0.639671	0.70502	0.77561	0.856278	0.963979	1.09558	1.29942	1.59181	4.93097	55.5173
0.0574096	0.101523	0.145754	0.187801	0.230404	0.257613	0.295442	0.331887	0.363423	0.40684	0.443929	0.492188	0.538293	0.584424	0.639814	0.70587	0.775939	0.856408	0.965881	1.09863	1.30212	1.59638	4.94858	55.5358
0.0574676	0.101564	0.145834	0.187875	0.23043	0.257745	0.2955	0.332055	0.363483	0.406937	0.444581	0.492188	0.538525	0.585139	0.639881	0.7062	0.776075	0.857066	0.966365	1.09878	1.30213	1.60331	5.12319	55.5476
0.0574862	0.101585	0.145907	0.187968	0.230446	0.257755	0.29582	0.332179	0.363511	0.407107	0.44494	0.492188	0.538746	0.585149	0.640422	0.708153	0.776115	0.857303	0.966547	1.10056	1.30407	1.60566	5.22668	55.5768
0.0575056	0.101769	0.14597	0.188	0.230456	0.258061	0.295835	0.332448	0.363555	0.407667	0.445435	0.492188	0.538957	0.585343	0.640569	0.709412	0.7764	0.858161	0.967897	1.10056	1.3045	1.61012	5.30286	55.864
0.057588	0.101924	0.146072	0.188422	0.230831	0.25812	0.295867	0.332775	0.363859	0.408234	0.445445	0.492188	0.539128	0.585554	0.640979	0.709958	0.776517	0.858616	0.968053	1.10073	1.30788	1.6175	5.34309	55.9209
0.057588	0.101976	0.146264	0.188571	0.231085	0.258164	0.296097	0.332926	0.363877	0.408237	0.445611	0.492188	0.539209	0.58582	0.641015	0.71037	0.776582	0.859343	0.969866	1.10133	1.30886	1.6191	5.56666	56.3344
0.057624	0.102179	0.146521	0.189015	0.231092	0.258537	0.296225	0.33303	0.36424	0.408352	0.445616	0.492188	0.539288	0.586041	0.641586	0.710793	0.777505	0.859469	0.969883	1.10152	1.31018	1.63008	6.14222	56.3922
0.0576449	0.10222	0.146628	0.189155	0.231367	0.258721	0.296318	0.333187	0.364332	0.408353	0.445719	0.492188	0.539608	0.586945	0.642088	0.710903	0.778118	0.859571	0.970762	1.10186	1.31019	1.63984	6.19126	56.5828
0.057681	0.102345	0.146656	0.189183	0.23149	0.258851	0.29632	0.333427	0.364479	0.408355	0.445882	0.492188	0.539726	0.586993	0.642266	0.711275	0.778217	0.860877	0.973351	1.10411	1.31475	1.64216	6.49205	56.673
0.0576995	0.102372	0.146677	0.189331	0.231509	0.258946	0.296354	0.333606	0.364659	0.408544	0.446396	0.492188	0.539748	0.587	0.643018	0.711689	0.778217	0.861174	0.97392	1.10458	1.3177	1.64353	6.73009	56.9439
0.0577791	0.102442	0.147099	0.189369	0.231675	0.259246	0.296468	0.333798	0.364717	0.408669	0.446427	0.492188	0.540114	0.5876	0.644145	0.712294	0.778217	0.864637	0.975067	1.1046	1.31908	1.64588	6.89616	57.1322
0.0577909	0.102495	0.147348	0.189497	0.23174	0.259375	0.29657	0.333879	0.364937	0.408733	0.446442	0.492188	0.540133	0.58809	0.644618	0.712434	0.778217	0.866551	0.975112	1.10505	1.32526	1.64773	7.23175	57.5566
0.0578451	0.102513	0.147406	0.189533	0.231948	0.259384	0.296736	0.333908	0.364957	0.408745	0.446526	0.492188	0.540368	0.588294	0.644623	0.712503	0.778217	0.867127	0.975528	1.10547	1.32526	1.64888	8.41498	57.6147
0.0578981	0.102559	0.147555	0.189579	0.232403	0.259429	0.297191	0.333996	0.365007	0.409613	0.446808	0.492188	0.540763	0.588385	0.644777	0.713056	0.778217	0.868392	0.977509	1.10646	1.32526	1.65085	8.93881	57.7997
0.0580607	0.102699	0.147571	0.189688	0.232446	0.260432	0.297302	0.33415	0.365407	0.409886	0.447587	0.492188	0.541227	0.589411	0.646378	0.713665	0.778217	0.869062	0.977708	1.1081	1.32526	1.6568	9.12392	58.6441
0.0582356	0.102731	0.147772	0.189763	0.232721	0.260622	0.297382	0.334191	0.365482	0.410171	0.447653	0.492188	0.542389	0.589528	0.646485	0.715543	0.778522	0.869692	0.977776	1.1093	1.32526	1.65898	9.29762	58.7006
0.0583403	0.102739	0.147793	0.189823	0.232794	0.260729	0.2975	0.334233	0.36564	0.410635	0.447757	0.492357	0.542517	0.589722	0.647259	0.715742	0.778824	0.869946	0.97886	1.10975	1.32526	1.65964	9.35218	59.8617
0.0585703	0.102845	0.148012	0.189959	0.232926	0.260977	0.297533	0.33424	0.365762	0.41065	0.448041	0.492474	0.543596	0.590581	0.648227	0.716191	0.780048	0.869979	0.981645	1.10991	1.32542	1.67165	10.1877	60.5886
0.0585874	0.102849	0.148087	0.189998	0.233238	0.261036	0.297597	0.335002	0.36602	0.410776	0.448283	0.492537	0.54389	0.590919	0.648851	0.71622	0.78007	0.870134	0.98177	1.10995	1.32772	1.682	10.2485	60.8902
0.0586181	0.102867	0.148119	0.190143	0.233332	0.261305	0.297634	0.335528	0.36687	0.411053	0.44862	0.492778	0.544122	0.590966	0.649274	0.716658	0.780128	0.870405	0.982574	1.11037	1.32849	1.70351	11.1332	61.3006
0.0586195	0.102962	0.148164	0.190186	0.233594	0.261306	0.298137	0.335619	0.36703	0.411224	0.448937	0.493282	0.544448	0.591424	0.649302	0.717386	0.780184	0.87116	0.983268	1.11116	1.33068	1.70633	11.837	61.3277
0.0586295	0.102997	0.148206	0.190456	0.233648	0.26142	0.298228	0.33564	0.367256	0.411352	0.449057	0.49386	0.544491	0.591905	0.649412	0.71748	0.780358	0.871926	0.983418	1.11444	1.33132	1.71162	12.0424	62.6209
0.0587047	0.103	0.148245	0.190476	0.233719	0.261673	0.298275	0.335814	0.367962	0.411605	0.449176	0.494118	0.544959	0.592165	0.64974	0.717563	0.780573	0.87221	0.983524	1.11723	1.33349	1.73603	12.1013	66.5156
0.0587244	0.103052	0.148287	0.190691	0.233727	0.261733	0.29844	0.335865	0.368186	0.411659	0.44928	0.494733	0.545113	0.592228	0.650073	0.717696	0.781824	0.873132	0.984201	1.12094	1.33358	1.73633	12.1968	69.5766
0.0588092	0.103056	0.148293	0.190738	0.233918	0.262115	0.299093	0.335889	0.368565	0.412046	0.449362	0.494878	0.545135	0.592397	0.650575	0.717924	0.782187	0.873187	0.984375	1.12117	1.33522	1.73633	12.661	72.2466
0.0588212	0.103122	0.148311	0.191073	0.233997	0.262371	0.29912	0.335893	0.368618	0.412099	0.449483	0.495041	0.545329	0.592836	0.651069	0.718115	0.782484	0.873955	0.984375	1.12572	1.33611	1.73633	13.0219	74.2732
0.0588246	0.103123	0.148334	0.191079	0.234071	0.262445	0.299234	0.336158	0.368707	0.412236	0.450478	0.495202	0.545343	0.592924	0.651263	0.718165	0.783105	0.874667	0.984375	1.12701	1.33732	1.74015	13.0563	75.4501
0.0588378	0.103167	0.148352	0.191122	0.234158	0.262526	0.29938	0.336579	0.369137	0.412896	0.450535	0.495394	0.545418	0.592926	0.651827	0.718297	0.783309	0.875079	0.984375	1.12743	1.34141	1.74015	13.31	76.1545
0.0588416	0.103206	0.148403	0.191182	0.234211	0.262582	0.300004	0.33692	0.369366	0.413087	0.45082	0.495441	0.54559	0.593065	0.652707	0.718433	0.784391	0.875223	0.984375	1.12825	1.34326	1.74015	13.3806	85.2255
0.0588604	0.103291	0.148716	0.191231	0.234215	0.262606	0.300236	0.337074	0.369421	0.413105	0.451133	0.495561	0.54567	0.5931	0.652899	0.718576	0.784393	0.876739	0.984375	1.13085	1.34378	1.74015	13.5045	87.8969
0.0588674	0.103297	0.148909	0.191238	0.234401	0.26262	0.300613	0.33736	0.369458	0.41324	0.451145	0.496092	0.545919	0.5932	0.652977	0.718997	0.784393	0.876843	0.984375	1.13107	1.34465	1.74015	13.5747	88.7014
0.0588697	0.103412	0.148936	0.191274	0.234426	0.263104	0.300919	0.337499	0.369473	0.413359	0.451604	0.496094	0.545938	0.593546	0.65303	0.719203	0.784393	0.877441	0.984375	1.13207	1.3452	1.75092	13.6164	88.9492
0.0589045	0.103504	0.14901	0.191708	0.234548	0.263126	0.301028	0.337522	0.370027	0.413531	0.451888	0.496094	0.547315	0.594527	0.653731	0.719363	0.784393	0.877764	0.984375	1.13249	1.34848	1.7536	13.6516	90.6358
0.0589743	0.103565	0.149197	0.19177	0.234569	0.2632	0.301045	0.337624	0.370047	0.413675	0.451903	0.496094	0.547524	0.594688	0.654106	0.71964	0.785343	0.878532	0.984638	1.13686	1.34945	1.77461	14.03	90.6719
0.0589802	0.10364	0.149223	0.191891	0.234808	0.263305	0.301198	0.337724	0.370062	0.413742	0.452016	0.496094	0.547782	0.594885	0.654575	0.720504	0.786832	0.880173	0.984953	1.13745	1.3495	1.77645	14.1582	90.9023
0.0590074	0.103644	0.14927	0.191896	0.234832	0.263493	0.301322	0.337862	0.370493	0.413829	0.452325	0.496094	0.547956	0.594893	0.654672	0.721541	0.786842	0.881036	0.986124	1.14017	1.34968	1.77655	14.1603
0.0590572	0.103686	0.149457	0.191972	0.234844	0.263616	0.301341	0.337943	0.371451	0.413869	0.453099	0.496094	0.548287	0.595502	0.654907	0.721581	0.7873	0.88167	0.986141	1.14281	1.35101	1.78569	14.4911
0.0590848	0.103715	0.149507	0.192043	0.234956	0.263808	0.301528	0.338157	0.371622	0.41393	0.453136	0.496094	0.548422	0.595607	0.655336	0.721941	0.787364	0.881794	0.986593	1.1438	1.35133	1.78612	14.5589
0.0592685	0.103761	0.149549	0.19269	0.235073	0.264042	0.301551	0.33853	0.371962	0.414051	0.453273	0.496652	0.548436	0.59564	0.655592	0.722332	0.787461	0.882782	0.98714	1.14572	1.35296	1.78855	14.6071
0.0592991	0.103842	0.149557	0.192857	0.235081	0.264202	0.301654	0.338588	0.372024	0.41413	0.453501	0.496868	0.548518	0.596511	0.655682	0.723278	0.788224	0.883965	0.98714	1.14673	1.35649	1.79159	14.8041
0.0594016	0.103926	0.149684	0.1931	0.235132	0.264277	0.301923	0.338712	0.372157	0.41457	0.453629	0.496932	0.548719	0.597074	0.655781	0.723467	0.788306	0.884094	0.989513	1.14693	1.35654	1.79863	15.0146
0.0594316	0.103928	0.149724	0.193236	0.235178	0.264458	0.302121	0.338831	0.372237	0.41476	0.453829	0.497258	0.548839	0.597248	0.655815	0.723923	0.788583	0.885008	0.990189	1.14747	1.35969	1.80663	15.4413
0.0594348	0.103946	0.15	0.193243	0.235439	0.264947	0.302246	0.339085	0.372407	0.414831	0.453885	0.497382	0.549022	0.597726	0.655881	0.72394	0.788656	0.885609	0.990321	1.14827	1.35991	1.81023	15.5272
0.059442	0.103951	0.150057	0.193365	0.235468	0.265011	0.30244	0.339226	0.372612	0.415047	0.453898	0.497599	0.549156	0.597942	0.656307	0.724128	0.788819	0.885626	0.993053	1.14875	1.36057	1.81783	15.5401
0.059451	0.104086	0.150223	0.193378	0.235523	0.265225	0.3026	0.339239	0.373189	0.415202	0.453923	0.498589	0.549521	0.597972	0.656418	0.725468	0.789005	0.886023	0.994977	1.1495	1.3646	1.84169	15.9828
0.0594539	0.104112	0.150256	0.193709	0.235672	0.265284	0.302895	0.33924	0.373659	0.415214	0.454468	0.498822	0.549656	0.59814	0.656461	0.726597	0.789045	0.886062	0.995108	1.15003	1.36495	1.84771	16.2769
0.0595518	0.104139	0.150329	0.193906	0.235744	0.265425	0.303024	0.339332	0.373743	0.415267	0.454737	0.499438	0.550108	0.598371	0.656823	0.726754	0.790298	0.887304	0.99676	1.15006	1.36653	1.85644	16.5021
0.0596081	0.104279	0.150526	0.193978	0.235868	0.265443	0.303075	0.339884	0.373754	0.415731	0.454783	0.499637	0.550192	0.598497	0.656951	0.726876	0.79039	0.887304	0.9982	1.15161	1.36764	1.85671	17.2031
0.0596351	0.104401	0.150622	0.194025	0.235871	0.265482	0.303277	0.340086	0.373917	0.41575	0.454922	0.500148	0.550235	0.598876	0.657357	0.727506	0.790609	0.887304	0.998974	1.15301	1.36779	1.86543	17.6443
0.0597285	0.104443	0.150939	0.19417	0.235917	0.265654	0.303451	0.340266	0.374372	0.415752	0.454992	0.500845	0.550282	0.599106	0.658243	0.727945	0.791104	0.887304	0.999335	1.15451	1.36875	1.87419	17.8537
0.0597462	0.104719	0.151072	0.194183	0.236105	0.265658	0.303594	0.340497	0.374634	0.415829	0.455118	0.500938	0.550282	0.600936	0.658446	0.728153	0.79132	0.887304	1.0012	1.15465	1.37229	1.87419	18.1905
0.0597496	0.104759	0.151098	0.194231	0.236445	0.265838	0.303939	0.340521	0.37475	0.416026	0.455239	0.501264	0.550282	0.600943	0.659332	0.728252	0.791756	0.887304	1.00156	1.15799	1.37235	1.88996	19.1784
0.0597904	0.104861	0.151234	0.194322	0.236462	0.265868	0.30409	0.340624	0.374974	0.416623	0.455329	0.501413	0.550282	0.601572	0.659672	0.728406	0.792247	0.887304	1.00214	1.15835	1.37346	1.89772	19.427
0.0598157	0.104952	0.151356	0.194431	0.236745	0.265915	0.304201	0.340743	0.375106	0.417147	0.455605	0.501458	0.550282	0.601657	0.660755	0.728717	0.792355	0.887304	1.00356	1.16026	1.37686	1.91859	19.88
0.0598728	0.105105	0.151431	0.194676	0.236817	0.266125	0.304267	0.340777	0.375539	0.417532	0.455847	0.501654	0.550282	0.601948	0.660886	0.728795	0.793048	0.887304	1.00485	1.1625	1.37702	1.92205	21.0236
0.0599365	0.105118	0.151535	0.194686	0.236913	0.266158	0.304297	0.341022	0.37577	0.417549	0.455921	0.502824	0.550282	0.602192	0.660927	0.729058	0.793577	0.887348	1.00891	1.16293	1.38515	1.93276	22.8801
0.0599385	0.105212	0.151594	0.194979	0.23692	0.266349	0.304341	0.34147	0.375846	0.417552	0.456151	0.502904	0.550282	0.602308	0.661819	0.729365	0.79384	0.888765	1.01203	1.16454	1.38589	1.93367	24.7251
0.0599444	0.105256	0.15194	0.195249	0.236953	0.266507	0.304371	0.341561	0.376119	0.417786	0.4562	0.503062	0.550282	0.602323	0.661979	0.729537	0.794153	0.889443	1.01208	1.1646	1.38774	1.93657	25.4309
0.0599849	0.105294	0.151982	0.195295	0.236966	0.267032	0.304443	0.341678	0.376464	0.417794	0.456613	0.503167	0.550282	0.602345	0.662419	0.730302	0.794224	0.88975	1.01314	1.16535	1.39006	1.93731	26.6198
0.060035	0.105331	0.152002	0.195394	0.237048	0.267088	0.304446	0.342198	0.376646	0.417985	0.456643	0.503933	0.550282	0.602429	0.662789	0.730387	0.794579	0.889753	1.01467	1.16787	1.39395	1.94736	26.9048
0.060104	0.105383	0.152082	0.195483	0.237116	0.26733	0.304808	0.342297	0.376708	0.418231	0.4567	0.503969	0.550282	0.603118	0.663683	0.730491	0.795213	0.889815	1.01467	1.16923	1.40625	1.95562	27.1446
0.0602107	0.105442	0.152195	0.195525	0.237394	0.267378	0.304898	0.342391	0.376784	0.418249	0.456888	0.504172	0.550282	0.604038	0.663847	0.730498	0.795335	0.891462	1.01467	1.16957	1.40727	1.96699	27.4137
0.0602206	0.105449	0.152364	0.195581	0.237421	0.267455	0.305329	0.342584	0.376841	0.418459	0.457253	0.504199	0.550282	0.604059	0.663982	0.730888	0.795577	0.892857	1.01467	1.1717	1.40981	1.96875	28.633
0.0602991	0.105474	0.152516	0.195633	0.23791	0.267658	0.305427	0.342856	0.377025	0.418518	0.457299	0.50432	0.550485	0.604158	0.66405	0.731068	0.7956	0.894518	1.01467	1.17411	1.41308	1.96875	28.6343
0.0603142	0.105519	0.152582	0.195685	0.238306	0.267662	0.305631	0.342924	0.377195	0.418576	0.457647	0.504437	0.55068	0.60625	0.664438	0.731229	0.796616	0.895108	1.01467	1.1744	1.41925	1.96875	28.8929
0.0603729	0.105522	0.152797	0.19574	0.23842	0.267691	0.305772	0.343181	0.377367	0.418676	0.45793	0.504501	0.55088	0.60651	0.665664	0.731276	0.797816	0.895142	1.01467	1.17859	1.42121	1.98407	29.2001
0.0603953	0.105548	0.153073	0.195868	0.238443	0.267745	0.306468	0.34327	0.377377	0.418805	0.458487	0.504734	0.550881	0.606608	0.666194	0.731899	0.797908	0.895901	1.01467	1.17883	1.42393	1.99032	29.2453
0.0603971	0.105549	0.153107	0.195925	0.238575	0.267922	0.30658	0.343292	0.37741	0.419124	0.458631	0.505354	0.551263	0.607287	0.666519	0.732014	0.798	0.896124	1.01467	1.18093	1.42445	2.02191	29.3042
0.060428	0.105553	0.153283	0.196271	0.238639	0.267996	0.306622	0.34343	0.377427	0.419236	0.458801	0.505658	0.551284	0.607563	0.66809	0.733033	0.798238	0.89667	1.01469	1.18152	1.42613	2.02934	29.5842
0.0604957	0.105578	0.153317	0.196324	0.238822	0.267999	0.306788	0.343498	0.377436	0.41956	0.459383	0.50572	0.552017	0.607607	0.668599	0.733641	0.798302	0.897975	1.01591	1.18179	1.42892	2.03244	29.8482
0.0605043	0.105638	0.153326	0.196554	0.238889	0.268161	0.306834	0.343577	0.377868	0.419727	0.459386	0.505829	0.552033	0.607807	0.668684	0.734937	0.798974	0.898099	1.01612	1.19047	1.43098	2.07779	29.8682
0.0605103	0.105639	0.15345	0.196558	0.238919	0.268237	0.306875	0.343867	0.378182	0.419783	0.459609	0.505851	0.552052	0.609437	0.668702	0.735213	0.799438	0.899239	1.01787	1.19394	1.431	2.08216	30.2627
0.0605693	0.105718	0.153538	0.196591	0.239079	0.268293	0.307045	0.343927	0.378383	0.419958	0.459734	0.505939	0.552057	0.609439	0.668823	0.73627	0.801172	0.899518	1.01818	1.19677	1.43496	2.08342	30.4532
0.0606097	0.105739	0.153779	0.196656	0.23917	0.268387	0.307526	0.343961	0.378745	0.420062	0.459782	0.506118	0.552148	0.609527	0.669175	0.736326	0.801261	0.8996	1.0193	1.19824	1.4376	2.10478	30.542
0.060621	0.10579	0.153779	0.196917	0.239238	0.268402	0.307818	0.343979	0.379153	0.420177	0.460252	0.506159	0.552749	0.609845	0.669817	0.73641	0.801408	0.900351	1.02272	1.20014	1.44397	2.11185	30.5851
0.0606297	0.105826	0.153884	0.197024	0.23949	0.268598	0.308087	0.34436	0.379387	0.420498	0.460362	0.506268	0.552749	0.609937	0.669837	0.736711	0.80185	0.900426	1.02272	1.20286	1.44508	2.13378	30.6225
0.0606303	0.105894	0.153934	0.197216	0.239801	0.26871	0.308103	0.344388	0.379483	0.420513	0.460373	0.506338	0.552937	0.609955	0.670828	0.736884	0.802333	0.90158	1.02526	1.20302	1.44545	2.14878	30.6295
0.0606475	0.10596	0.153955	0.197325	0.240007	0.268711	0.308129	0.34453	0.37949	0.420905	0.460374	0.50637	0.553126	0.610307	0.671047	0.738281	0.80376	0.904539	1.02711	1.20313	1.44565	2.16015	30.6327
0.0606909	0.105985	0.154022	0.197366	0.24016	0.26916	0.30825	0.344595	0.379576	0.421137	0.460437	0.506377	0.553578	0.61032	0.671344	0.738281	0.80384	0.904557	1.02733	1.20331	1.44635	2.16597	30.6817
0.0607467	0.10616	0.154256	0.197473	0.240314	0.269225	0.308278	0.344602	0.379626	0.421591	0.460572	0.506382	0.553596	0.61052	0.671519	0.738281	0.805092	0.906254	1.02851	1.20439	1.44903	2.17104	30.7518
0.0608087	0.106165	0.15431	0.197492	0.240448	0.269243	0.308336	0.344904	0.379854	0.421643	0.460631	0.506396	0.553819	0.610686	0.672402	0.738281	0.805532	0.906279	1.02919	1.20557	1.44933	2.18768	30.9781
0.06085	0.106197	0.154337	0.197586	0.240527	0.269587	0.308432	0.345052	0.380393	0.421783	0.460826	0.506596	0.553961	0.61128	0.672891	0.738281	0.806016	0.906586	1.03223	1.20588	1.45339	2.21353	30.986
0.0608509	0.106312	0.154411	0.197805	0.240626	0.269604	0.308438	0.345302	0.380471	0.422304	0.460886	0.506632	0.554038	0.611625	0.673405	0.738281	0.80645	0.90708	1.03537	1.20593	1.4551	2.21484	31.0802
0.0608648	0.106373	0.154462	0.197921	0.24078	0.269616	0.308596	0.345444	0.380535	0.422491	0.461229	0.506811	0.554045	0.61201	0.673572	0.738281	0.806571	0.908218	1.03712	1.21054	1.45665	2.21631	31.1096
0.0609108	0.106483	0.154597	0.1981	0.241062	0.269715	0.30879	0.345651	0.380729	0.422626	0.461452	0.50705	0.55456	0.612317	0.673589	0.738281	0.808337	0.90875	1.03858	1.21151	1.46699	2.22847	31.294
0.0609126	0.106579	0.154612	0.198139	0.241138	0.269727	0.308941	0.345968	0.380916	0.422752	0.461628	0.507446	0.554623	0.612487	0.673779	0.738881	0.809405	0.909097	1.03882	1.21175	1.46778	2.22847	31.4316
0.0609278	0.106607	0.154654	0.198198	0.241357	0.270143	0.309002	0.3461	0.380919	0.422995	0.462593	0.507862	0.55465	0.612537	0.67401	0.740199	0.810594	0.909233	1.0402	1.21297	1.46937	2.24593	31.4638
0.0609509	0.106718	0.154654	0.198247	0.241619	0.270267	0.309042	0.346149	0.380944	0.423181	0.462652	0.508046	0.55465	0.613063	0.674406	0.740367	0.810897	0.909331	1.04032	1.22039	1.47074	2.25603	31.5049
0.0609653	0.106731	0.154743	0.198458	0.241919	0.270438	0.309231	0.346436	0.381143	0.423284	0.462758	0.508055	0.55465	0.613308	0.674696	0.74046	0.810925	0.910793	1.04099	1.22113	1.47118	2.26711	31.5322
0.0610146	0.107043	0.154773	0.198676	0.242036	0.270533	0.309498	0.346588	0.381249	0.4234	0.46298	0.508669	0.55465	0.613527	0.67478	0.740589	0.811167	0.911169	1.04164	1.22908	1.47418	2.2816	31.566
0.0610722	0.107095	0.154826	0.198694	0.242103	0.27056	0.3095	0.346683	0.381503	0.424097	0.463376	0.508823	0.55465	0.614059	0.674791	0.740692	0.812435	0.912147	1.04291	1.23047	1.47576	2.29314	31.6189
0.0610805	0.107123	0.154882	0.198762	0.242288	0.270875	0.309577	0.34681	0.38169	0.424356	0.463475	0.509396	0.55465	0.614197	0.67495	0.742334	0.812567	0.914284	1.04435	1.23047	1.47656	2.29622	31.8776
0.0611003	0.107176	0.154943	0.198778	0.242289	0.271123	0.309913	0.346928	0.381788	0.425222	0.463608	0.509647	0.55465	0.61434	0.675006	0.743763	0.812805	0.914842	1.04448	1.23047	1.47656	2.34007	31.9545
0.0611261	0.107192	0.154983	0.199187	0.242302	0.271154	0.30997	0.347739	0.381831	0.425371	0.463682	0.509703	0.55465	0.614819	0.675355	0.744141	0.813184	0.91561	1.04511	1.23047	1.47656	2.35967	32.3078
0.0611518	0.107328	0.155035	0.199217	0.242338	0.271227	0.310037	0.347788	0.382364	0.425384	0.463688	0.509813	0.55465	0.615061	0.675515	0.744909	0.813349	0.915785	1.04636	1.23047	1.47825	2.40603	33.119
0.061362	0.107411	0.155074	0.1994	0.242507	0.271336	0.310386	0.348029	0.382547	0.425459	0.464769	0.509857	0.55465	0.61522	0.675724	0.745498	0.813573	0.915984	1.0479	1.23047	1.48048	2.44298	34.347
0.0613831	0.107425	0.155315	0.199448	0.242576	0.271348	0.310439	0.348029	0.382788	0.425785	0.46483	0.510914	0.55465	0.615234	0.676163	0.74567	0.813641	0.916312	1.04806	1.23047	1.48314	2.46094	34.5735
0.0614005	0.107468	0.155498	0.199593	0.242795	0.271395	0.31064	0.348029	0.382789	0.426088	0.465471	0.511371	0.55465	0.615243	0.676183	0.747357	0.814849	0.916604	1.05292	1.23047	1.48736	2.48047	34.7238
0.0614271	0.107482	0.155519	0.199608	0.242809	0.271728	0.310643	0.348029	0.382806	0.426188	0.465802	0.511424	0.554914	0.615268	0.676919	0.747394	0.816365	0.921127	1.05321	1.23047	1.48828	2.48047	36.1183
0.0614571	0.107496	0.155547	0.199851	0.243103	0.271859	0.310771	0.348029	0.382906	0.426474	0.465983	0.511912	0.556479	0.615773	0.67696	0.74767	0.817122	0.923104	1.05373	1.23047	1.49281	2.52959	36.626
0.0614804	0.107497	0.155655	0.199875	0.243158	0.271883	0.310943	0.348029	0.3832	0.42658	0.466114	0.512196	0.556873	0.615791	0.677077	0.748486	0.818224	0.924428	1.05484	1.23286	1.49693	2.5538	37.0601
0.0615851	0.107498	0.155686	0.199905	0.243322	0.272034	0.31102	0.348029	0.383479	0.426715	0.466822	0.512316	0.556918	0.616011	0.677308	0.748548	0.81851	0.925847	1.05564	1.23289	1.49693	2.5665	37.4546
0.0616357	0.107523	0.155719	0.199906	0.243397	0.272117	0.311073	0.348029	0.383679	0.426734	0.46716	0.512385	0.557113	0.616232	0.677964	0.748664	0.819418	0.92597	1.05623	1.23533	1.49693	2.58969	37.7488
0.0617059	0.107551	0.155721	0.200019	0.243524	0.272145	0.3111	0.348029	0.384031	0.427184	0.467201	0.512389	0.557115	0.616283	0.678296	0.749256	0.820356	0.92731	1.05639	1.23706	1.49693	2.58969	38.0225
0.0617389	0.107635	0.155765	0.20032	0.244063	0.272528	0.311118	0.348029	0.384207	0.427467	0.46729	0.512393	0.558152	0.616284	0.678716	0.749875	0.820712	0.928447	1.057	1.23895	1.49693	2.61893	39.1017
0.0617711	0.107867	0.156022	0.200364	0.244201	0.272871	0.311498	0.348029	0.384212	0.427931	0.468502	0.512468	0.558191	0.616332	0.678805	0.749971	0.821066	0.92848	1.05812	1.24023	1.50082	2.71107	39.4522
0.0618438	0.107888	0.1561	0.200373	0.244241	0.273009	0.311688	0.348029	0.384333	0.428351	0.468622	0.51254	0.558662	0.616532	0.679626	0.750121	0.821404	0.929121	1.05905	1.2405	1.50319	2.74224	40.1121
0.0618691	0.107969	0.15615	0.200438	0.244289	0.273015	0.312054	0.348029	0.384478	0.428397	0.468894	0.513368	0.558968	0.61706	0.680069	0.750337	0.822668	0.929488	1.05938	1.24052	1.5037	2.82077	40.2998
0.0618759	0.108104	0.156179	0.200507	0.244395	0.273245	0.312095	0.348029	0.384618	0.428417	0.469044	0.513378	0.55916	0.617132	0.680756	0.750781	0.823298	0.930563	1.05974	1.2409	1.50486	2.8475	40.5083
0.0619024	0.108212	0.156378	0.200514	0.24466	0.273303	0.312206	0.348029	0.38514	0.428446	0.469059	0.513645	0.559554	0.61724	0.681361	0.751098	0.8236	0.931823	1.06031	1.24149	1.50609	2.89734	40.5742
0.0619602	0.108251	0.15644	0.200577	0.244669	0.273762	0.312309	0.348029	0.3853	0.42865	0.469153	0.514419	0.559932	0.617308	0.681558	0.751142	0.82363	0.931923	1.0612	1.24319	1.51058	2.90331	40.6772
0.0620298	0.108285	0.156526	0.200763	0.244775	0.273781	0.312387	0.348029	0.385452	0.428684	0.469462	0.514699	0.56072	0.617336	0.68172	0.751254	0.824008	0.932744	1.06183	1.24512	1.51293	3.2033	41.9356
0.0621484	0.108298	0.156591	0.201013	0.244858	0.273808	0.312448	0.348029	0.38554	0.428699	0.469487	0.514735	0.560808	0.61803	0.682029	0.751416	0.824744	0.933091	1.06195	1.2466	1.5138	3.26179	42.0103
0.0622599	0.108306	0.157127	0.201014	0.24523	0.273897	0.312467	0.348029	0.385767	0.428791	0.469622	0.514814	0.560838	0.61812	0.682069	0.751527	0.824974	0.934926	1.06233	1.24681	1.51384	3.2998	42.0572
0.0623105	0.108364	0.157141	0.201036	0.245505	0.273901	0.312561	0.348029	0.38599	0.429085	0.469626	0.514842	0.560918	0.618166	0.682138	0.751624	0.825552	0.935257	1.0639	1.24831	1.51406	3.30915	42.1966
0.062347	0.108476	0.157178	0.201121	0.245575	0.274	0.312607	0.348029	0.38616	0.429086	0.469698	0.514982	0.561134	0.618327	0.6827	0.751994	0.825595	0.93809	1.06484	1.2522	1.51633	3.3738	42.2468
0.0623576	0.108692	0.157285	0.201332	0.245684	0.274046	0.312788	0.348029	0.386244	0.429103	0.469969	0.515397	0.561559	0.618445	0.682758	0.752349	0.826829	0.938384	1.06486	1.2526	1.5218	3.38876	42.4144
0.0624208	0.10875	0.157305	0.201578	0.24575	0.2741	0.312881	0.348149	0.386254	0.429221	0.47004	0.515406	0.56193	0.61909	0.683034	0.752834	0.82702	0.938469	1.06492	1.25352	1.52917	3.51033	42.6102
0.0624867	0.108791	0.157347	0.201629	0.24583	0.274256	0.313011	0.348417	0.386681	0.429332	0.470133	0.515577	0.561938	0.619101	0.683427	0.753078	0.827656	0.93926	1.06959	1.25484	1.53744	3.51198	42.6372
0.0624967	0.109075	0.157387	0.201717	0.245995	0.274268	0.313179	0.34844	0.386847	0.429415	0.470477	0.516173	0.562627	0.619385	0.684015	0.753224	0.8278	0.93939	1.07154	1.25484	1.54502	3.61202	42.7594
0.0625122	0.109084	0.157429	0.201742	0.246094	0.27452	0.31354	0.348495	0.386979	0.42962	0.471013	0.516758	0.563321	0.619454	0.684329	0.753931	0.828261	0.939761	1.07403	1.25484	1.54536	3.91252	42.8655
0.062547	0.109318	0.157439	0.201812	0.246094	0.274777	0.314024	0.348507	0.387098	0.430197	0.471118	0.516889	0.563793	0.619461	0.684464	0.754044	0.828369	0.939888	1.07717	1.25484	1.54638	3.93039	42.9584
0.0625504	0.109554	0.157481	0.201883	0.246094	0.274974	0.314036	0.348557	0.387304	0.43089	0.471595	0.517058	0.563795	0.619962	0.685121	0.754109	0.82984	0.942701	1.07717	1.25484	1.55183	4.08913	43.0632
0.0625528	0.10957	0.157548	0.202002	0.246094	0.275389	0.31413	0.348726	0.387318	0.430953	0.472129	0.517127	0.563828	0.620523	0.685877	0.75422	0.830308	0.942803	1.0787	1.25484	1.55736	4.17665	43.5898
0.0625849	0.10961	0.157586	0.202078	0.246094	0.275517	0.314237	0.349167	0.3876	0.431059	0.47235	0.517165	0.563946	0.620706	0.686576	0.754227	0.830372	0.943592	1.08046	1.25484	1.55835	4.47822	43.6331
0.0626162	0.110033	0.15834	0.202202	0.246094	0.275605	0.314581	0.34923	0.387636	0.431121	0.472515	0.517199	0.56406	0.621472	0.687051	0.754309	0.831873	0.944263	1.08095	1.25484	1.56026	4.51897	43.829
0.0626694	0.110188	0.158405	0.202202	0.246094	0.275738	0.31499	0.349407	0.387762	0.431882	0.47283	0.517484	0.564402	0.621667	0.687231	0.754453	0.832474	0.94547	1.08307	1.25484	1.56168	4.59406	44.5964
0.0627672	0.110297	0.158437	0.202305	0.246094	0.275911	0.315051	0.349414	0.388073	0.432134	0.47292	0.517497	0.564604	0.621752	0.687794	0.754456	0.832789	0.946074	1.08517	1.25783	1.56276	4.67325	45.2248
0.0628857	0.110387	0.158504	0.202314	0.246094	0.275972	0.31527	0.349424	0.388085	0.432363	0.472933	0.517526	0.565136	0.622395	0.687823	0.755147	0.833849	0.946703	1.087	1.25881	1.56647	4.67776	45.309
0.0629063	0.1104	0.158558	0.20234	0.246094	0.276001	0.315625	0.349454	0.388361	0.432531	0.472939	0.517755	0.565695	0.623896	0.68853	0.755878	0.834414	0.94913	1.08767	1.27008	1.56794	4.69004	45.6377
0.0629068	0.110475	0.158617	0.202365	0.246094	0.276133	0.315985	0.349494	0.388497	0.432907	0.473059	0.517866	0.565787	0.624363	0.688553	0.756872	0.834754	0.949709	1.08907	1.27019	1.57293	4.69321	45.7968
0.0629466	0.110522	0.158628	0.202451	0.246094	0.27621	0.316096	0.349541	0.38987	0.433074	0.47313	0.518455	0.566502	0.624386	0.68898	0.756985	0.835229	0.953668	1.09065	1.27191	1.57445	4.6937	45.9282
0.0629568	0.110523	0.158657	0.202636	0.246094	0.276674	0.316107	0.34967	0.390046	0.433251	0.473313	0.518695	0.566536	0.624481	0.689179	0.756988	0.835241	0.955791	1.09313	1.27256	1.57577	4.71898	46.2848
0.0630308	0.110654	0.158715	0.203078	0.246094	0.276949	0.316342	0.349863	0.39021	0.433528	0.473319	0.51901	0.56658	0.624866	0.68941	0.757262	0.836068	0.955898	1.09373	1.27509	1.58042	4.73865	46.3463
0.063056	0.110689	0.158827	0.203241	0.246094	0.276967	0.316485	0.349902	0.390977	0.433634	0.473475	0.519199	0.567186	0.625338	0.689575	0.757355	0.836416	0.956292	1.09395	1.27552	1.58261	4.76683	46.4644
0.0631077	0.110706	0.158891	0.203288	0.246094	0.277608	0.316808	0.350216	0.390988	0.433788	0.473998	0.519282	0.567191	0.625754	0.690316	0.758044	0.837389	0.957692	1.0942	1.27851	1.59535	4.81756	46.6354
0.0631096	0.110748	0.158963	0.20352	0.246094	0.277698	0.316832	0.350301	0.390995	0.43379	0.474297	0.519635	0.567223	0.625795	0.690357	0.758688	0.837697	0.959531	1.09518	1.27954	1.59715	4.82842	47.1538
0.0631124	0.110897	0.159003	0.203588	0.246094	0.277795	0.316941	0.350469	0.391028	0.434168	0.474431	0.519846	0.567724	0.626954	0.690787	0.759587	0.837814	0.959644	1.09674	1.28052	1.59793	4.85506	47.2294
0.063123	0.111097	0.159166	0.203614	0.246094	0.27792	0.317153	0.350766	0.391358	0.43445	0.474482	0.520474	0.568033	0.626998	0.691528	0.759775	0.83858	0.961412	1.09714	1.2808	1.60304	4.98774	47.5235
0.063123	0.111111	0.159245	0.203629	0.246094	0.278007	0.317167	0.350791	0.391448	0.434453	0.474579	0.520589	0.568361	0.627025	0.691702	0.759777	0.838617	0.96186	1.09754	1.28115	1.60312	5.01525	47.8466
0.0632663	0.111162	0.159273	0.203807	0.246094	0.27804	0.317584	0.350791	0.391809	0.434822	0.474848	0.520681	0.56865	0.627037	0.691704	0.759963	0.839014	0.961909	1.09802	1.28135	1.60405	5.19449	48.0458
0.0633473	0.111269	0.159411	0.20388	0.246094	0.278154	0.317672	0.350791	0.391851	0.434986	0.47519	0.521165	0.568865	0.627081	0.69203	0.76023	0.839025	0.961938	1.0989	1.28166	1.61056	5.34309	48.821
0.0633589	0.111285	0.159452	0.204186	0.246094	0.278285	0.317724	0.350791	0.393038	0.435479	0.47562	0.521188	0.569471	0.627204	0.692477	0.760958	0.83904	0.963579	1.09926	1.28333	1.61075	5.45137	49.0694
0.0633951	0.111379	0.159628	0.204205	0.246094	0.278321	0.318332	0.350791	0.393055	0.435524	0.475624	0.521197	0.569497	0.627242	0.692832	0.761207	0.839567	0.963791	1.10056	1.28345	1.61703	5.50902	49.929
0.0633954	0.111402	0.159635	0.204292	0.246094	0.278401	0.318492	0.350791	0.39395	0.435604	0.475959	0.521452	0.569549	0.627418	0.693006	0.761423	0.839702	0.964567	1.10056	1.28476	1.61878	5.56569	50.057
0.0633973	0.111448	0.159888	0.204468	0.246094	0.278577	0.318517	0.350968	0.394067	0.435894	0.476078	0.521816	0.569811	0.627542	0.693395	0.761853	0.840211	0.964982	1.10056	1.29457	1.62315	6.05781	50.7775
0.063467	0.111468	0.159988	0.204586	0.246094	0.278746	0.318555	0.351362	0.39421	0.435927	0.476468	0.5219	0.569869	0.627987	0.693965	0.762387	0.840561	0.9665	1.10056	1.30637	1.63444	6.14925	50.9963
0.0635094	0.111512	0.160038	0.204592	0.246094	0.27875	0.318763	0.351668	0.394859	0.436467	0.476742	0.521919	0.569878	0.628555	0.69555	0.762733	0.84128	0.968459	1.10214	1.30721	1.64968	6.5148	51.2231
0.0635556	0.111521	0.160057	0.20464	0.246094	0.278848	0.318841	0.352093	0.394989	0.436788	0.47707	0.522098	0.570394	0.628705	0.696058	0.764026	0.841367	0.969039	1.10304	1.31045	1.65358	6.77036	51.2994
0.0635724	0.111602	0.160092	0.204695	0.246094	0.279043	0.319019	0.352301	0.395022	0.437679	0.478172	0.522229	0.570434	0.628761	0.696058	0.764534	0.842752	0.970766	1.10458	1.31072	1.65375	7.26768	51.4188
0.0635971	0.111756	0.160159	0.204748	0.246094	0.27932	0.319261	0.352478	0.395282	0.437762	0.4785	0.522265	0.571071	0.629024	0.696058	0.764634	0.844155	0.971513	1.10544	1.31159	1.66756	7.70301	51.5891
0.0636695	0.111826	0.160252	0.204779	0.246094	0.279365	0.319288	0.352488	0.396021	0.43797	0.478621	0.522292	0.571126	0.629183	0.696058	0.764721	0.844421	0.974152	1.10547	1.31268	1.67044	7.89585	51.7716
0.063707	0.111865	0.160444	0.204886	0.246094	0.279569	0.319426	0.352867	0.396155	0.438297	0.478915	0.522434	0.571399	0.6294	0.696058	0.764995	0.845487	0.974348	1.10568	1.31314	1.67288	8.98033	51.9877
0.0637409	0.111901	0.160479	0.20511	0.246094	0.279725	0.31943	0.352967	0.396242	0.438411	0.479351	0.522505	0.571603	0.629458	0.696058	0.765096	0.846062	0.975658	1.10656	1.31367	1.67651	9.11802	52.2465
0.0637527	0.112057	0.16057	0.205124	0.246094	0.279759	0.319459	0.353044	0.396321	0.438583	0.479473	0.522545	0.571825	0.629464	0.696058	0.765458	0.846593	0.977293	1.10742	1.31475	1.68127	9.22602	52.9415
0.0637535	0.112083	0.160583	0.205155	0.246094	0.279951	0.320177	0.353304	0.396847	0.438591	0.479528	0.522955	0.571874	0.629832	0.696472	0.765469	0.847021	0.980268	1.10783	1.31475	1.68356	9.46037	53.1863
0.0637564	0.112246	0.160616	0.205179	0.246094	0.280115	0.320184	0.353474	0.396896	0.439082	0.479863	0.522998	0.572443	0.630213	0.69698	0.76584	0.847099	0.981026	1.10865	1.31534	1.68782	9.64464	53.2408
0.0638541	0.112301	0.160648	0.205215	0.246094	0.28033	0.320189	0.353601	0.396957	0.439124	0.480061	0.523028	0.572671	0.630531	0.697037	0.765952	0.848577	0.981467	1.10887	1.31602	1.69981	10.1198	53.2771
0.0638689	0.112332	0.160678	0.20533	0.246094	0.280415	0.3202	0.353625	0.397155	0.439218	0.480288	0.52308	0.572749	0.630534	0.697243	0.766184	0.848912	0.983084	1.1093	1.31747	1.70087	10.232	53.316
0.063886	0.112496	0.160731	0.205418	0.246094	0.280584	0.320633	0.353861	0.3973	0.439239	0.480291	0.523635	0.572913	0.630619	0.697572	0.766379	0.849061	0.983297	1.10999	1.31861	1.70746	10.3498	53.5695
0.0638939	0.112514	0.160791	0.205429	0.246094	0.280709	0.320704	0.354058	0.397441	0.439329	0.480669	0.523664	0.572913	0.631012	0.698216	0.76664	0.849675	0.984375	1.11113	1.32009	1.71465	10.3854	53.79
0.0638956	0.112656	0.160815	0.205443	0.246094	0.280716	0.320714	0.354072	0.398007	0.439964	0.480837	0.523778	0.573144	0.631073	0.699131	0.766713	0.850044	0.984375	1.11122	1.32076	1.7182	11.16	54.0205
0.0639202	0.112695	0.16088	0.20556	0.246094	0.280761	0.320748	0.354129	0.398237	0.44009	0.481017	0.523889	0.573321	0.631358	0.699762	0.766738	0.850393	0.984375	1.11238	1.32338	1.72266	11.6594	54.4353
0.063966	0.112753	0.161038	0.205617	0.246094	0.280801	0.320922	0.354134	0.398479	0.440227	0.481249	0.523948	0.573341	0.632221	0.700583	0.766991	0.853516	0.984375	1.11534	1.32495	1.72266	11.6764	54.5496
0.0640309	0.11281	0.161107	0.205677	0.246094	0.28092	0.321037	0.354469	0.39854	0.440671	0.481809	0.524336	0.57358	0.632241	0.700946	0.767242	0.853532	0.984375	1.11586	1.32526	1.72555	11.8488	54.5809
0.0640459	0.112833	0.161179	0.20572	0.246094	0.281152	0.321132	0.354488	0.398751	0.440677	0.482057	0.524659	0.574061	0.632349	0.701277	0.767423	0.853941	0.984375	1.11596	1.32526	1.73346	12.106	54.9098
0.0640908	0.112849	0.161253	0.206003	0.246094	0.281174	0.321209	0.354517	0.398915	0.441598	0.482306	0.524815	0.574397	0.633176	0.701335	0.767455	0.854981	0.984375	1.11638	1.32526	1.73603	12.2835	55.1172
0.0641097	0.11286	0.161261	0.206068	0.246094	0.281273	0.321226	0.354554	0.398997	0.441813	0.483026	0.524857	0.574657	0.633307	0.701346	0.767596	0.85765	0.984375	1.11817	1.32911	1.73633	12.4223	55.2957
0.0641173	0.11291	0.161269	0.206078	0.246094	0.281296	0.321398	0.3546	0.399052	0.442021	0.483096	0.525043	0.57527	0.63335	0.701583	0.767716	0.858007	0.984375	1.11979	1.334	1.73633	12.8766	55.523
0.0641932	0.113079	0.161279	0.206228	0.246094	0.281381	0.321556	0.355181	0.399251	0.442205	0.483239	0.525144	0.575699	0.6336	0.701747	0.767946	0.859196	0.984375	1.11981	1.33538	1.73683	12.9497	55.6753
0.0644386	0.11309	0.161303	0.206314	0.246094	0.281541	0.321577	0.355378	0.399763	0.442337	0.483884	0.525162	0.576115	0.633815	0.702017	0.768126	0.859276	0.984375	1.12023	1.3379	1.73891	13.0714	57.1669
0.0644565	0.113158	0.161321	0.206495	0.246094	0.281627	0.321588	0.355474	0.39977	0.442382	0.484139	0.525181	0.576208	0.633964	0.702818	0.769131	0.859878	0.984375	1.12085	1.3413	1.74015	13.4286	57.4753
0.0644753	0.113198	0.161553	0.206548	0.246094	0.281724	0.321724	0.355603	0.399783	0.44297	0.484179	0.525446	0.576286	0.634751	0.703034	0.769914	0.85994	0.985463	1.12256	1.34416	1.74015	13.6911	57.8096
0.0645435	0.113203	0.162074	0.206584	0.246094	0.281768	0.321855	0.355713	0.399958	0.44323	0.484845	0.525673	0.576366	0.634759	0.703242	0.769937	0.86044	0.986408	1.1233	1.34601	1.74015	13.7312	58.1562
0.0645594	0.113255	0.162115	0.206602	0.246094	0.281855	0.321907	0.355725	0.400022	0.443438	0.484847	0.525761	0.576427	0.635671	0.703493	0.769947	0.861021	0.987011	1.12519	1.34674	1.74015	13.8212	58.2415
0.0645981	0.113306	0.16213	0.20675	0.246094	0.281965	0.322276	0.356174	0.400054	0.443879	0.485378	0.525782	0.577292	0.635691	0.703511	0.770014	0.861627	0.98714	1.12548	1.34761	1.74015	13.8995	58.8049
0.0646015	0.113355	0.162257	0.206757	0.246094	0.282062	0.322424	0.35675	0.400172	0.444363	0.485471	0.526323	0.57761	0.636646	0.703605	0.770049	0.861984	0.98714	1.12827	1.34764	1.74015	13.9657	58.9307
0.0646728	0.113402	0.162424	0.206814	0.246094	0.282108	0.322519	0.356774	0.400334	0.445001	0.485662	0.52642	0.577899	0.636727	0.703632	0.770785	0.862094	0.987951	1.13119	1.34783	1.75396	14.1876	58.9344
0.0647339	0.113542	0.16243	0.206954	0.246106	0.282259	0.322877	0.356811	0.400544	0.445133	0.485813	0.526735	0.578811	0.637413	0.703748	0.771529	0.862208	0.989314	1.13421	1.35084	1.76593	14.2251	58.9849
0.0647691	0.113601	0.162561	0.206991	0.246166	0.282369	0.323001	0.356815	0.400711	0.445286	0.485978	0.526826	0.578907	0.63801	0.703801	0.77282	0.862756	0.98943	1.13533	1.35097	1.77039	14.2449	59.0766
0.0647732	0.113631	0.162665	0.207045	0.246352	0.282549	0.323018	0.357051	0.400933	0.445433	0.486588	0.52701	0.57902	0.638625	0.703902	0.772952	0.862988	0.990049	1.13942	1.35247	1.7739	14.5589	59.5592
0.0648573	0.113643	0.162675	0.20705	0.246422	0.28262	0.323681	0.357078	0.401408	0.445452	0.487285	0.527521	0.579119	0.638795	0.704357	0.773259	0.865251	0.991389	1.13948	1.3531	1.77461	14.6537	62.2871
0.0650583	0.113744	0.162731	0.20707	0.246448	0.282925	0.323857	0.357236	0.401554	0.445759	0.487359	0.52755	0.579192	0.638818	0.704415	0.773382	0.865657	0.992165	1.14005	1.35352	1.78472	14.8097	65.4307
0.0651075	0.113784	0.162833	0.207182	0.246645	0.283091	0.323887	0.357487	0.401788	0.446062	0.487612	0.527641	0.579302	0.638952	0.704424	0.773671	0.866144	0.993157	1.14195	1.36522	1.79159	15.0881	68.1587
0.0651164	0.114068	0.162881	0.207343	0.246661	0.283199	0.324001	0.357532	0.401856	0.446327	0.488236	0.527673	0.579478	0.639161	0.704619	0.774389	0.868131	0.993443	1.1461	1.36609	1.79343	15.0881	70.573
0.0651657	0.114108	0.163008	0.207452	0.246821	0.283463	0.324051	0.357659	0.401964	0.446567	0.488598	0.527675	0.57964	0.640314	0.704967	0.775581	0.868502	0.994765	1.14674	1.37352	1.79584	15.4715	71.9161
0.0651936	0.114164	0.163077	0.207468	0.246856	0.283515	0.324504	0.357936	0.401995	0.446803	0.489243	0.52792	0.580547	0.640535	0.704968	0.775626	0.868728	0.995099	1.14719	1.37596	1.80877	15.7665	72.4869
0.0652367	0.11417	0.163294	0.207497	0.246933	0.283624	0.324718	0.357965	0.403027	0.446818	0.489431	0.529021	0.581223	0.640577	0.705765	0.77596	0.868959	0.99778	1.1476	1.37678	1.81881	15.8226	73.2875
0.0653176	0.11425	0.163315	0.207605	0.247098	0.28416	0.32474	0.358007	0.40319	0.446864	0.48994	0.529089	0.581795	0.640716	0.705862	0.776794	0.869814	0.998079	1.15119	1.37719	1.83406	16.4909	80.3754
0.0653651	0.114441	0.163373	0.207714	0.247101	0.28429	0.324831	0.358096	0.403508	0.446964	0.490304	0.529104	0.581901	0.64119	0.705943	0.776944	0.87016	1.00192	1.15194	1.37827	1.85298	16.9776	83.8748
0.0653714	0.114463	0.163445	0.207787	0.247114	0.2843	0.324928	0.358471	0.403516	0.44705	0.49077	0.529789	0.581929	0.641357	0.705974	0.777272	0.870201	1.00632	1.1521	1.37921	1.85924	17.103	84.3618
0.0653754	0.114569	0.163457	0.208056	0.247297	0.284361	0.324969	0.358497	0.403971	0.447832	0.491031	0.530267	0.582076	0.641882	0.706352	0.777654	0.870302	1.0072	1.15255	1.3812	1.86229	17.1327	84.4536
0.0654575	0.114619	0.163506	0.208125	0.247299	0.284446	0.325059	0.358596	0.404269	0.448383	0.491052	0.530291	0.583034	0.641909	0.706447	0.778217	0.870865	1.00873	1.15307	1.38313	1.8635	17.2031	85.9049
0.0654722	0.114624	0.163536	0.208405	0.247313	0.284504	0.32514	0.35874	0.404278	0.448521	0.491603	0.530418	0.583059	0.641958	0.706871	0.778217	0.871031	1.01178	1.15343	1.3846	1.87419	17.9436	87.2138
0.0654954	0.114733	0.16366	0.208479	0.247337	0.284676	0.325146	0.359023	0.404707	0.448781	0.491714	0.530476	0.583296	0.642498	0.706926	0.778217	0.871321	1.01189	1.15347	1.38564	1.88567	18.1695	87.7554
0.0655388	0.114908	0.163698	0.208541	0.247524	0.28501	0.325254	0.359586	0.404747	0.448863	0.491764	0.530506	0.583437	0.642708	0.707552	0.778217	0.871448	1.01207	1.15526	1.3859	1.88999	18.2158	87.8222
0.0656601	0.114997	0.163828	0.208797	0.247555	0.285014	0.325283	0.359763	0.404795	0.449227	0.492174	0.530629	0.58347	0.643132	0.707656	0.778217	0.876704	1.01287	1.15642	1.38808	1.91859	18.4979
0.0656703	0.115001	0.163964	0.208862	0.247733	0.285105	0.325393	0.359892	0.404915	0.450044	0.492188	0.53085	0.583756	0.643306	0.707683	0.778217	0.878387	1.01406	1.1566	1.3931	1.92205	18.7947
0.0657419	0.115176	0.163967	0.208911	0.24775	0.285276	0.325411	0.359939	0.405244	0.450082	0.492188	0.531535	0.584244	0.64359	0.707816	0.778283	0.879634	1.01467	1.15861	1.39703	1.92446	20.4283
0.0657729	0.115231	0.163998	0.209003	0.247806	0.285334	0.325437	0.359987	0.405501	0.45026	0.492188	0.532143	0.58431	0.643788	0.709168	0.778801	0.881255	1.01467	1.15873	1.40625	1.93731	21.9232
0.0659399	0.115338	0.164019	0.209229	0.248003	0.285393	0.326124	0.360133	0.405886	0.450356	0.492188	0.532326	0.584406	0.644034	0.709267	0.779876	0.882609	1.01467	1.15937	1.40898	1.96613	23.4701
0.0660243	0.115373	0.164076	0.209345	0.24803	0.286117	0.326216	0.360174	0.406675	0.450574	0.492188	0.532653	0.58452	0.644285	0.709391	0.782074	0.883204	1.01467	1.16009	1.41075	1.98438	24.1881
0.0660589	0.115377	0.164183	0.209394	0.248047	0.286226	0.326402	0.360243	0.40687	0.450594	0.492188	0.533114	0.584771	0.644585	0.709949	0.782306	0.883701	1.01467	1.16075	1.41136	1.98772	24.3056
0.0660849	0.115443	0.164186	0.209737	0.248047	0.286303	0.32642	0.360647	0.406872	0.450693	0.492188	0.533279	0.585039	0.644628	0.710115	0.78237	0.884902	1.01485	1.16235	1.41546	1.99851	24.8542
0.06613	0.115471	0.164286	0.209756	0.248047	0.286671	0.326473	0.360924	0.407335	0.450745	0.492188	0.533839	0.586316	0.644785	0.710218	0.782776	0.885416	1.01544	1.16377	1.41895	2.02016	25.8001
0.06613	0.115623	0.164347	0.210228	0.248047	0.286714	0.326493	0.361266	0.407852	0.450822	0.492188	0.533839	0.586348	0.645683	0.710618	0.782821	0.885877	1.01661	1.1645	1.41928	2.02268	26.3495
0.0661667	0.115642	0.164424	0.210261	0.248047	0.286898	0.326577	0.361558	0.40786	0.451071	0.492188	0.533994	0.586411	0.646087	0.711293	0.783002	0.885974	1.01883	1.16471	1.42061	2.02849	26.773
0.0662068	0.115706	0.16458	0.210456	0.248047	0.286974	0.326631	0.361577	0.407876	0.451177	0.492188	0.534646	0.586584	0.646281	0.711391	0.784354	0.886563	1.01994	1.16644	1.42585	2.02934	27.4518
0.0662254	0.115717	0.164625	0.210498	0.248047	0.287027	0.326703	0.361725	0.408015	0.451353	0.492188	0.53499	0.587299	0.646343	0.711796	0.784369	0.886885	1.02109	1.16823	1.4265	2.0319	27.6157
0.0662267	0.115722	0.164843	0.210594	0.248047	0.287101	0.326842	0.362182	0.408326	0.451633	0.492188	0.535146	0.587597	0.646611	0.71229	0.784393	0.887304	1.0217	1.16876	1.4266	2.05886	27.6316
0.0662857	0.115936	0.164987	0.210691	0.248047	0.287204	0.32698	0.362185	0.408334	0.451791	0.492188	0.535823	0.588515	0.647488	0.71273	0.784393	0.887304	1.0219	1.17223	1.42733	2.09168	27.6995
0.0662866	0.116083	0.165076	0.210754	0.248047	0.287395	0.326992	0.362496	0.408729	0.452043	0.492188	0.535876	0.588575	0.647537	0.713335	0.784393	0.887304	1.02272	1.17491	1.42892	2.09279	27.9314
0.0662995	0.116171	0.165085	0.210845	0.248047	0.287597	0.327117	0.362518	0.408866	0.452435	0.492188	0.536368	0.589486	0.648393	0.713798	0.784789	0.887304	1.02272	1.17678	1.43157	2.09298	28.0425
0.0663219	0.116186	0.165142	0.211257	0.248047	0.287766	0.32732	0.362589	0.408876	0.452647	0.492188	0.537	0.589861	0.648792	0.71395	0.785579	0.887304	1.02569	1.17882	1.43457	2.09919	28.336
0.0663294	0.116478	0.165157	0.211263	0.248047	0.287841	0.327363	0.363626	0.409009	0.452761	0.492188	0.53716	0.589956	0.649275	0.714753	0.786125	0.887348	1.02584	1.1822	1.43496	2.11409	28.348
0.0663437	0.116491	0.165218	0.211494	0.248047	0.287879	0.327534	0.364295	0.409357	0.452765	0.492188	0.53719	0.5902	0.649503	0.715747	0.786513	0.887522	1.02678	1.18227	1.43496	2.13378	28.4574
0.0663994	0.116524	0.165438	0.211726	0.248047	0.288069	0.328121	0.364445	0.409603	0.453127	0.492188	0.53719	0.590261	0.649538	0.716283	0.786629	0.888076	1.02795	1.1831	1.43496	2.13378	28.9376
0.0664345	0.116663	0.16545	0.211816	0.248047	0.288143	0.328192	0.364524	0.409681	0.453148	0.492188	0.53719	0.590448	0.649719	0.717048	0.787097	0.888701	1.02852	1.1831	1.43516	2.13506	28.9621
0.0664345	0.116692	0.165503	0.211944	0.248047	0.288397	0.328801	0.364682	0.409868	0.453216	0.492188	0.53779	0.590626	0.649746	0.71748	0.787146	0.888731	1.02884	1.18462	1.43916	2.16224	29.0331
0.0664783	0.116773	0.165534	0.212226	0.248047	0.288639	0.328891	0.364696	0.409968	0.453287	0.492188	0.538305	0.590727	0.650164	0.717815	0.787524	0.889034	1.0301	1.18614	1.4395	2.21484	29.1251
0.0665984	0.116778	0.165669	0.212533	0.248047	0.288698	0.329025	0.364902	0.41021	0.45347	0.492188	0.538878	0.591135	0.650326	0.717839	0.78843	0.889373	1.03016	1.18805	1.44142	2.21484	29.1779
0.0667211	0.116797	0.165756	0.212576	0.248047	0.288724	0.329205	0.364977	0.410979	0.453472	0.492188	0.540081	0.591364	0.650841	0.718094	0.788458	0.889587	1.03029	1.18938	1.44189	2.21484	29.4435
0.0668016	0.11689	0.16584	0.212605	0.248047	0.288767	0.32947	0.36527	0.411012	0.45364	0.492188	0.540511	0.591381	0.651047	0.718437	0.788656	0.890498	1.03037	1.19047	1.44759	2.21688	29.5092
0.0668075	0.116953	0.165932	0.212753	0.248047	0.288794	0.32975	0.365352	0.41128	0.453674	0.492188	0.541129	0.593347	0.651078	0.719445	0.788847	0.890611	1.03133	1.19053	1.44941	2.2344	29.527
0.06682	0.117102	0.165998	0.212782	0.248047	0.28884	0.329752	0.365354	0.411481	0.454709	0.492209	0.541533	0.593357	0.651443	0.720504	0.789115	0.892426	1.03305	1.19083	1.46318	2.24548	29.6185
0.0669325	0.117246	0.166189	0.212875	0.248047	0.288848	0.329807	0.365558	0.411519	0.455187	0.492391	0.54158	0.593533	0.651613	0.720811	0.789327	0.893177	1.03429	1.19227	1.46533	2.24593	29.6519
0.066982	0.117315	0.166289	0.212881	0.248047	0.28896	0.329879	0.365628	0.411597	0.455195	0.492395	0.541615	0.593746	0.651696	0.721868	0.789651	0.893296	1.03453	1.19238	1.46622	2.25988	29.7584
0.0670971	0.117448	0.166289	0.212902	0.248047	0.289163	0.329905	0.365756	0.411613	0.455334	0.492823	0.541705	0.593943	0.652279	0.722334	0.789808	0.893432	1.03706	1.201	1.47003	2.26091	29.8995
0.0671408	0.117527	0.166506	0.213023	0.248397	0.289262	0.329926	0.365762	0.411637	0.455359	0.492838	0.541715	0.593944	0.652306	0.722668	0.79027	0.894346	1.03756	1.20233	1.47427	2.26887	30.072
0.0672786	0.117538	0.166535	0.213621	0.248649	0.289288	0.330169	0.365794	0.411821	0.455473	0.493029	0.542063	0.594816	0.652538	0.723022	0.79095	0.894773	1.03905	1.20647	1.47584	2.27643	30.1354
0.0673084	0.117691	0.166572	0.213789	0.248773	0.289338	0.330379	0.36598	0.41189	0.455579	0.493227	0.542068	0.595018	0.653488	0.724233	0.791639	0.894852	1.04142	1.20722	1.47639	2.27847	30.3571
0.0673211	0.117734	0.166736	0.214052	0.248972	0.289528	0.330625	0.366008	0.411896	0.45559	0.493395	0.542297	0.59519	0.653734	0.725628	0.791913	0.895455	1.04191	1.20901	1.47656	2.30218	30.7685
0.06744	0.117763	0.166804	0.214179	0.249662	0.289715	0.330811	0.366074	0.412056	0.455682	0.493768	0.543328	0.595521	0.654117	0.726358	0.793508	0.896397	1.04396	1.21454	1.47692	2.34007	30.7781
0.0675505	0.117845	0.166815	0.21421	0.249723	0.290029	0.330823	0.366179	0.412081	0.455982	0.494438	0.543803	0.59582	0.65415	0.726748	0.793546	0.897209	1.04409	1.21725	1.47748	2.35318	30.8417
0.0675591	0.117949	0.167056	0.214246	0.249726	0.290057	0.330908	0.36619	0.412226	0.455989	0.494695	0.544118	0.596496	0.654225	0.726753	0.793593	0.897395	1.04446	1.22139	1.48526	2.37732	31.0683
0.0675593	0.117979	0.167153	0.214349	0.249849	0.290066	0.330941	0.366606	0.412256	0.45677	0.494967	0.544318	0.597031	0.654642	0.727124	0.794529	0.897509	1.04641	1.22166	1.48613	2.44298	31.1395
0.0675795	0.117981	0.167154	0.214369	0.250027	0.290175	0.330984	0.366755	0.412549	0.456878	0.495074	0.544534	0.597182	0.654644	0.72733	0.794704	0.897794	1.04683	1.22427	1.48765	2.44512	31.212
0.067607	0.117992	0.167561	0.214392	0.250564	0.290336	0.331005	0.366761	0.412806	0.457528	0.495226	0.544773	0.597726	0.654768	0.727339	0.795407	0.898209	1.04793	1.22592	1.48794	2.48047	31.306
0.0676454	0.11813	0.16759	0.214469	0.250878	0.290342	0.331169	0.366928	0.413068	0.459043	0.495256	0.544783	0.597732	0.654808	0.727386	0.795437	0.898318	1.04811	1.22801	1.48828	2.48728	31.5334
0.067704	0.118208	0.167627	0.214565	0.250982	0.290542	0.331172	0.367146	0.413343	0.459059	0.495388	0.545072	0.597885	0.655361	0.727459	0.795697	0.902386	1.04862	1.23034	1.48873	2.52959	31.6345
0.0678265	0.118241	0.167759	0.214576	0.251215	0.290589	0.331274	0.367295	0.413381	0.459581	0.495468	0.54513	0.598138	0.655519	0.728365	0.79589	0.90369	1.04966	1.23047	1.49497	2.5538	31.6808
0.0678283	0.118323	0.167868	0.21461	0.251395	0.29063	0.331436	0.367366	0.413419	0.459709	0.495523	0.545398	0.598274	0.655777	0.72851	0.796763	0.903975	1.05033	1.23047	1.49558	2.58969	31.7384
0.067833	0.118324	0.167918	0.21471	0.251535	0.29077	0.331477	0.36761	0.413524	0.45987	0.495562	0.545668	0.599007	0.656791	0.728822	0.797405	0.905536	1.05057	1.23047	1.49595	2.63761	31.8776
0.0678608	0.11853	0.168039	0.214937	0.251575	0.290804	0.331509	0.3677	0.413525	0.460122	0.495658	0.545966	0.599025	0.656986	0.728975	0.798178	0.905773	1.05098	1.23047	1.49693	2.72729	31.9365
0.0679412	0.118561	0.168259	0.215012	0.251816	0.290837	0.331622	0.367924	0.413755	0.460171	0.496044	0.546713	0.59912	0.658677	0.7298	0.798422	0.906189	1.05171	1.23131	1.49693	2.73735	32.6792
0.0679811	0.118647	0.16839	0.215206	0.252113	0.29089	0.3317	0.368509	0.41388	0.460416	0.496094	0.54676	0.599328	0.659242	0.730627	0.798986	0.906977	1.0525	1.23235	1.49693	2.90879	33.7544
0.0680539	0.118694	0.168393	0.215297	0.252119	0.291035	0.332167	0.368553	0.41421	0.460499	0.496094	0.547055	0.599608	0.659291	0.730984	0.799742	0.907934	1.05258	1.23425	1.49693	3.0278	33.9456
0.0680902	0.118699	0.168586	0.215356	0.252458	0.291076	0.332305	0.368563	0.414293	0.460723	0.496094	0.54707	0.599629	0.6594	0.731627	0.800763	0.910405	1.05376	1.23578	1.49959	3.18643	34.3243
0.0681103	0.118926	0.168659	0.215359	0.25258	0.291174	0.332445	0.368928	0.414589	0.461363	0.496094	0.547126	0.599837	0.659919	0.731898	0.800989	0.910853	1.05417	1.23652	1.50482	3.26668	34.5321
0.0681334	0.11897	0.168968	0.21555	0.252715	0.291581	0.332974	0.369019	0.414717	0.461367	0.496094	0.547204	0.599897	0.660206	0.732181	0.80156	0.913378	1.0544	1.23661	1.5059	3.3738	34.8758
0.0681573	0.118991	0.16903	0.215573	0.253155	0.2917	0.333541	0.369221	0.414764	0.461476	0.496094	0.547464	0.59998	0.66051	0.732782	0.803574	0.914898	1.05822	1.23706	1.50761	3.38289	35.566
0.0682001	0.119029	0.169096	0.215763	0.25319	0.291763	0.333759	0.3696	0.414906	0.461554	0.496094	0.54789	0.600114	0.661071	0.733429	0.804209	0.915986	1.05938	1.23732	1.50866	3.39879	36.168
0.0682066	0.119096	0.169153	0.215846	0.253273	0.291914	0.333836	0.369629	0.415116	0.461766	0.496094	0.547985	0.600277	0.661713	0.733732	0.80497	0.917639	1.06008	1.23749	1.50933	3.42348	36.2884
0.0682094	0.119147	0.169215	0.21587	0.253369	0.291922	0.334065	0.369764	0.415134	0.462152	0.496094	0.548051	0.600393	0.661789	0.734821	0.804972	0.91809	1.06476	1.24023	1.51296	3.47171	36.3457
0.0683204	0.119175	0.169319	0.215896	0.253453	0.291962	0.334087	0.369887	0.415435	0.462509	0.496185	0.548774	0.600638	0.662363	0.735174	0.805288	0.918155	1.06491	1.24452	1.51631	3.56007	37.2768
0.068435	0.119196	0.169325	0.216014	0.253489	0.292035	0.33422	0.370293	0.416094	0.462548	0.496261	0.548886	0.600777	0.662538	0.736215	0.806067	0.918715	1.06582	1.24557	1.52042	3.58389	37.5683
0.068488	0.119206	0.169331	0.216043	0.253756	0.292161	0.33422	0.370945	0.416375	0.462654	0.496676	0.548986	0.601022	0.662976	0.736296	0.806488	0.920571	1.06752	1.25121	1.52617	3.72896	37.571
0.0685851	0.119337	0.169377	0.216059	0.253769	0.292471	0.334364	0.371214	0.416835	0.463063	0.497161	0.549204	0.601217	0.663107	0.73702	0.806509	0.921287	1.06892	1.25207	1.52847	3.81517	38.3602
0.0686176	0.119356	0.169378	0.216177	0.25396	0.292518	0.33449	0.371459	0.416848	0.463334	0.497454	0.549244	0.601256	0.663315	0.738281	0.806996	0.921658	1.06936	1.25244	1.53195	3.96293	39.1319
0.0686603	0.119365	0.169391	0.216227	0.254039	0.292667	0.334588	0.371631	0.416875	0.463434	0.497725	0.549371	0.601295	0.663801	0.738281	0.806999	0.922085	1.06947	1.25291	1.53248	4.03567	40.0027
0.0686642	0.119405	0.169391	0.216266	0.254138	0.292809	0.334663	0.371958	0.417073	0.463536	0.497744	0.549452	0.601627	0.66399	0.738281	0.807004	0.922313	1.06959	1.25371	1.53291	4.05097	40.0536
0.0686758	0.119433	0.169515	0.216377	0.254251	0.29298	0.334675	0.372047	0.417237	0.463612	0.497784	0.549749	0.601934	0.664799	0.738281	0.807749	0.9232	1.06996	1.25429	1.53764	4.12525	40.0627
0.0686964	0.119439	0.169565	0.216404	0.254408	0.293176	0.334799	0.372338	0.417303	0.463714	0.497875	0.549766	0.602507	0.665457	0.738281	0.808545	0.923255	1.07007	1.25451	1.53963	4.29362	40.2511
0.0686964	0.119534	0.169655	0.216574	0.254424	0.293318	0.335171	0.372508	0.417596	0.464332	0.4983	0.550203	0.60275	0.665531	0.738281	0.809067	0.924487	1.07169	1.25484	1.54502	4.34574	40.3265
0.0687158	0.119639	0.169703	0.21668	0.25447	0.293357	0.335472	0.372534	0.417717	0.464393	0.498624	0.550282	0.602891	0.666411	0.738281	0.80948	0.924505	1.07184	1.25484	1.54799	4.48092	40.452
0.0687166	0.119722	0.169737	0.216716	0.254476	0.293521	0.335502	0.372594	0.417757	0.464627	0.499137	0.550282	0.603002	0.666583	0.738281	0.809844	0.92541	1.0722	1.25484	1.54929	4.54883	40.7036
0.0687171	0.119749	0.16977	0.216825	0.254662	0.293674	0.335973	0.372623	0.417848	0.464848	0.499681	0.550282	0.603386	0.667016	0.738755	0.811293	0.92748	1.0722	1.25484	1.55351	4.54997	40.7615
0.0687587	0.119757	0.169783	0.21733	0.255189	0.293758	0.336149	0.372709	0.41794	0.465199	0.499767	0.550282	0.603501	0.667256	0.740155	0.81258	0.927667	1.07341	1.25484	1.55643	4.58083	40.8664
0.0688004	0.119823	0.169814	0.21744	0.255239	0.293898	0.33625	0.373145	0.417957	0.465717	0.49977	0.550282	0.603513	0.667734	0.740693	0.813201	0.928987	1.07445	1.25484	1.5584	4.59468	41.0006
0.0688017	0.119887	0.169861	0.217815	0.255295	0.293946	0.336484	0.373696	0.418247	0.465815	0.50001	0.550282	0.604071	0.668095	0.741202	0.813328	0.929953	1.07525	1.2556	1.55953	4.61659	41.0915
0.0688018	0.119904	0.169871	0.218028	0.255778	0.293959	0.336552	0.373725	0.418587	0.466642	0.500148	0.550282	0.604181	0.668239	0.741664	0.814891	0.934097	1.07533	1.25793	1.55965	4.6644	41.1534
0.0688035	0.11991	0.169911	0.21833	0.256035	0.294103	0.336617	0.373727	0.418689	0.46672	0.500359	0.550282	0.604339	0.668629	0.741734	0.815683	0.935679	1.07692	1.26158	1.5598	4.67133	41.3623
0.0688324	0.119968	0.170071	0.218375	0.256204	0.294194	0.336663	0.373844	0.418723	0.466916	0.500443	0.550282	0.604496	0.668939	0.741762	0.815814	0.936354	1.07802	1.26196	1.5615	4.69243	41.6063
0.0688387	0.120044	0.170088	0.218483	0.256246	0.294626	0.336826	0.3741	0.418948	0.466936	0.500728	0.550282	0.604763	0.669569	0.742996	0.815963	0.93683	1.07852	1.2653	1.56218	4.72002	42.2379
0.0688733	0.120057	0.170388	0.21852	0.256282	0.294648	0.336898	0.374347	0.418976	0.466951	0.501336	0.550282	0.605027	0.669709	0.743106	0.816364	0.937474	1.07896	1.27008	1.56517	4.74173	42.5839
0.0688845	0.12006	0.170412	0.218547	0.256363	0.294663	0.33697	0.374777	0.419111	0.467548	0.501438	0.550282	0.605282	0.670579	0.743809	0.81673	0.937787	1.07935	1.27369	1.56766	4.74208	42.6913
0.068926	0.120236	0.170421	0.218686	0.256471	0.29474	0.337432	0.374862	0.419269	0.467675	0.501776	0.550282	0.606178	0.670669	0.743983	0.818881	0.93799	1.08058	1.27851	1.57389	4.89137	42.7959
0.0689276	0.120257	0.170649	0.218703	0.256654	0.294766	0.337609	0.37496	0.419578	0.467834	0.50182	0.550282	0.606348	0.671001	0.744498	0.819289	0.938574	1.08191	1.28317	1.57424	4.9211	43.0074
0.0689627	0.120315	0.17089	0.218766	0.256679	0.294777	0.337628	0.37518	0.419595	0.468115	0.502041	0.550282	0.606477	0.671083	0.744847	0.819311	0.938745	1.08264	1.28386	1.57503	4.9554	43.1539
0.0690301	0.120356	0.171014	0.21885	0.256728	0.294866	0.337928	0.37521	0.419682	0.468366	0.502609	0.550282	0.606846	0.671361	0.745388	0.819958	0.939407	1.08362	1.28529	1.57577	5.14105	43.9151
0.0690627	0.120569	0.17102	0.21915	0.256922	0.294972	0.338011	0.375252	0.419758	0.468738	0.502632	0.550282	0.60703	0.671402	0.745921	0.820473	0.939568	1.0845	1.28616	1.57671	5.20237	43.9555
0.0690945	0.120614	0.171219	0.21926	0.257083	0.294989	0.33802	0.375325	0.419869	0.469219	0.502659	0.550785	0.607152	0.671445	0.746219	0.820921	0.940396	1.0846	1.28752	1.57706	5.33802	44.5259
0.0691142	0.120617	0.171351	0.219374	0.257085	0.295075	0.33846	0.375427	0.419921	0.469329	0.502755	0.551034	0.607695	0.672697	0.746654	0.820978	0.940962	1.09485	1.28823	1.58313	5.4657	44.6089
0.0691398	0.120632	0.171374	0.21941	0.257263	0.295079	0.338659	0.375778	0.420317	0.469533	0.502801	0.551273	0.609252	0.672774	0.746708	0.822343	0.941094	1.0951	1.28845	1.5863	5.79398	45.0667
0.0691436	0.120644	0.171598	0.21963	0.257362	0.295309	0.338807	0.375861	0.420513	0.469582	0.503007	0.551853	0.609884	0.673764	0.747505	0.822478	0.94416	1.09552	1.29123	1.5911	6.01107	45.1162
0.0692426	0.120682	0.171658	0.219748	0.257381	0.295355	0.338907	0.376273	0.42084	0.469854	0.503508	0.551883	0.610245	0.673907	0.747634	0.822901	0.945614	1.09635	1.29136	1.59342	6.17117	45.1421
0.0693847	0.120799	0.171658	0.219772	0.25739	0.295502	0.339327	0.376402	0.420857	0.470499	0.503678	0.551977	0.610279	0.674129	0.748014	0.824161	0.946753	1.0992	1.29573	1.59902	6.42935	45.2276
0.0694318	0.12083	0.171874	0.220107	0.257409	0.295762	0.339506	0.376594	0.421304	0.470503	0.503721	0.551992	0.61065	0.67422	0.748806	0.825823	0.947723	1.10006	1.29583	1.61307	6.43172	45.3644
0.0694327	0.120852	0.171924	0.220168	0.257561	0.295846	0.339576	0.376605	0.421698	0.470581	0.503875	0.552618	0.611561	0.675541	0.74911	0.826885	0.950663	1.10056	1.29666	1.6175	7.368	45.4981
0.06945	0.120879	0.171926	0.220216	0.257638	0.295869	0.339747	0.376718	0.42175	0.470639	0.503914	0.553492	0.611639	0.675711	0.749445	0.827405	0.952445	1.10056	1.2974	1.63008	7.63534	45.6588
0.0694559	0.120997	0.172097	0.220309	0.257929	0.295985	0.339898	0.376922	0.421848	0.47083	0.504045	0.553638	0.612537	0.676021	0.749833	0.827419	0.953067	1.10056	1.2976	1.64019	7.78488	46.0583
0.069498	0.121014	0.172219	0.220423	0.258031	0.296079	0.339903	0.377403	0.421899	0.470922	0.504166	0.554018	0.612691	0.676332	0.75067	0.827494	0.953179	1.10056	1.30163	1.64126	7.92418	46.1536
0.0695536	0.121018	0.172331	0.220604	0.258267	0.296103	0.339965	0.377541	0.421971	0.471056	0.504234	0.554089	0.612928	0.677194	0.750721	0.828473	0.954212	1.10056	1.30254	1.64773	8.24146	46.3809
0.0695719	0.121036	0.172358	0.220623	0.258468	0.296141	0.339971	0.377568	0.422094	0.471059	0.504283	0.5542	0.613749	0.678404	0.750737	0.828597	0.955286	1.10193	1.30351	1.65375	8.46578	46.6767
0.06962	0.121117	0.17241	0.22067	0.258776	0.296606	0.339984	0.377721	0.422675	0.471169	0.504797	0.55465	0.613763	0.678465	0.751052	0.828614	0.959998	1.10206	1.30417	1.65424	8.59618	47.7507
0.0696864	0.121206	0.172449	0.220696	0.258936	0.296705	0.340125	0.377831	0.423338	0.472142	0.505557	0.55465	0.615011	0.679595	0.751324	0.829647	0.961109	1.10255	1.30632	1.66116	9.03643	47.8948
0.0697225	0.121284	0.172532	0.220871	0.258964	0.296751	0.340131	0.377942	0.423608	0.472379	0.505649	0.55465	0.615399	0.680016	0.751889	0.830849	0.961164	1.10434	1.30675	1.66265	9.07306	48.4467
0.0697229	0.121288	0.172635	0.221511	0.259255	0.296896	0.340366	0.37817	0.423797	0.472464	0.50722	0.55465	0.615668	0.680045	0.752564	0.832234	0.961415	1.10448	1.30737	1.66403	9.28211	48.4739
0.0697641	0.121298	0.172635	0.221524	0.259314	0.296914	0.340493	0.378179	0.423824	0.472743	0.507251	0.55465	0.615886	0.680134	0.753261	0.832288	0.961736	1.10589	1.31046	1.68523	9.39021	48.7797
0.0698848	0.121337	0.172742	0.221539	0.259483	0.297319	0.340625	0.379026	0.424219	0.473238	0.50742	0.55465	0.616687	0.680153	0.753502	0.832911	0.9625	1.10609	1.31456	1.68664	9.52007	48.8373
0.0698976	0.12142	0.172997	0.221599	0.259572	0.297449	0.34093	0.379034	0.424334	0.473414	0.507509	0.55465	0.6172	0.680347	0.753687	0.834101	0.963	1.10676	1.31475	1.69939	9.6371	48.9995
0.069918	0.121496	0.173066	0.221712	0.259789	0.297642	0.340991	0.379069	0.424672	0.47359	0.507582	0.55465	0.617212	0.680388	0.753849	0.835299	0.964312	1.10694	1.31475	1.70349	10.8981	49.0753
0.0699232	0.121606	0.173074	0.221798	0.259864	0.297686	0.341064	0.379116	0.424698	0.474061	0.507764	0.55465	0.617311	0.680681	0.754075	0.835433	0.965142	1.10706	1.31645	1.7123	11.2046	49.266
0.0699378	0.121606	0.173261	0.222001	0.260499	0.297725	0.341174	0.379127	0.426078	0.474192	0.508949	0.555157	0.617313	0.68079	0.75416	0.835736	0.965794	1.10742	1.32282	1.72734	11.4021	49.3527
0.069953	0.121609	0.173413	0.222098	0.260556	0.297797	0.341429	0.379411	0.426368	0.474338	0.51016	0.555557	0.617568	0.680876	0.756118	0.838004	0.966028	1.1093	1.32404	1.72917	11.4731	49.5793
0.069953	0.12162	0.173465	0.222217	0.260597	0.298043	0.341457	0.379714	0.426401	0.475133	0.510618	0.555718	0.618792	0.681391	0.756475	0.839046	0.967702	1.10938	1.32517	1.7331	11.4876	49.7258
0.0699531	0.12174	0.173523	0.222241	0.260658	0.298147	0.341566	0.379926	0.426511	0.475264	0.510625	0.556454	0.619075	0.681616	0.756691	0.839227	0.972271	1.11291	1.32526	1.73633	11.5974	49.8887
0.0700449	0.121862	0.173639	0.222275	0.260768	0.298157	0.341805	0.380134	0.42713	0.476166	0.510783	0.556456	0.619981	0.681857	0.757108	0.839671	0.973302	1.11524	1.32526	1.73891	11.7536	49.9362
0.0700491	0.12192	0.17365	0.222312	0.260893	0.29841	0.341846	0.380402	0.427833	0.476281	0.511154	0.556485	0.620005	0.681988	0.757279	0.839714	0.973373	1.11531	1.32526	1.74015	12.1353	50.6292
0.0700656	0.122181	0.173658	0.222326	0.261092	0.298443	0.342419	0.380524	0.42809	0.476543	0.51193	0.55695	0.620474	0.682511	0.75737	0.839863	0.973603	1.11842	1.32526	1.74015	12.2168	50.8193
0.0700867	0.122194	0.173805	0.222855	0.261202	0.298534	0.342429	0.38055	0.42811	0.47666	0.512029	0.556993	0.620478	0.683308	0.758495	0.840189	0.97396	1.12041	1.32526	1.74015	12.5773	50.8763
0.0700967	0.12228	0.173968	0.222881	0.261294	0.298582	0.342479	0.380596	0.428177	0.476735	0.512411	0.557205	0.620555	0.683877	0.760107	0.840452	0.974243	1.12046	1.32526	1.74015	12.9638	50.9241
0.0701873	0.122284	0.173977	0.222938	0.261457	0.298775	0.342501	0.380727	0.428444	0.476782	0.512547	0.557243	0.620687	0.684024	0.761724	0.840557	0.974837	1.12113	1.32588	1.74101	12.9958	51.0693
0.0701915	0.122359	0.174027	0.223385	0.261675	0.299029	0.342954	0.380901	0.428776	0.477118	0.514246	0.557341	0.62155	0.68464	0.762903	0.840841	0.976214	1.12151	1.32767	1.74228	13.5134	51.415
0.0701916	0.12236	0.174076	0.223452	0.261682	0.299225	0.343036	0.381032	0.429376	0.477118	0.514354	0.557821	0.62172	0.685212	0.763019	0.841199	0.977623	1.12386	1.32816	1.75396	13.6516	51.4452
0.0702961	0.122481	0.174278	0.223598	0.262165	0.29933	0.343394	0.381237	0.429454	0.477546	0.514597	0.557823	0.621772	0.685436	0.763397	0.841291	0.978181	1.12402	1.33045	1.75396	13.7181	51.7719
0.0703412	0.122648	0.174306	0.2237	0.262266	0.299331	0.343489	0.381439	0.429477	0.477594	0.514936	0.558552	0.622027	0.686191	0.763847	0.841881	0.978686	1.12506	1.33057	1.77461	13.8009	51.7953
0.0704778	0.122674	0.174622	0.223767	0.262388	0.29944	0.343598	0.381706	0.429714	0.477972	0.514946	0.559028	0.622039	0.687532	0.764354	0.842295	0.979603	1.12529	1.33125	1.77839	13.9701	52.1479
0.0704819	0.12268	0.174632	0.223985	0.262608	0.299798	0.343674	0.381915	0.429815	0.47806	0.515211	0.559454	0.622483	0.688504	0.766101	0.842402	0.979624	1.12891	1.33236	1.78869	14.0947	52.2487
0.0705089	0.122691	0.17488	0.224265	0.262642	0.299807	0.343972	0.382067	0.430204	0.478279	0.515329	0.559505	0.622521	0.68861	0.766383	0.842516	0.98006	1.12945	1.33626	1.79482	14.1038	52.4607
0.0705798	0.122693	0.175001	0.2244	0.262643	0.299947	0.3441	0.382147	0.430463	0.478523	0.515446	0.559534	0.623142	0.688882	0.766396	0.843061	0.980587	1.13119	1.33819	1.80513	14.1474	52.6635
0.0706342	0.122723	0.175049	0.224407	0.262692	0.299973	0.344313	0.382148	0.430698	0.478534	0.516084	0.559845	0.624065	0.689234	0.766841	0.844069	0.981583	1.13152	1.34063	1.81632	14.194	52.6977
0.0707134	0.122785	0.175084	0.22444	0.262746	0.300011	0.344329	0.382446	0.430803	0.47858	0.516376	0.559867	0.624352	0.689614	0.767941	0.844203	0.981902	1.1325	1.3434	1.81643	14.3138	52.7306
0.0707143	0.122807	0.175108	0.224469	0.262904	0.300039	0.344351	0.382502	0.430946	0.478624	0.516493	0.560103	0.624363	0.690006	0.768632	0.844379	0.983164	1.13384	1.34469	1.83237	14.4704	52.8742
0.0707779	0.12284	0.175113	0.224501	0.262937	0.300084	0.34453	0.382636	0.431518	0.479175	0.516613	0.56013	0.625067	0.690148	0.768662	0.844997	0.983219	1.1351	1.34491	1.83648	14.5546	53.1253
0.0707926	0.122899	0.17512	0.224504	0.263138	0.300472	0.344668	0.382659	0.431805	0.479241	0.516629	0.560809	0.625522	0.6903	0.769075	0.845333	0.983879	1.13645	1.3467	1.85399	14.8435	53.6277
0.0708241	0.122926	0.175302	0.224548	0.26321	0.300483	0.34508	0.382782	0.43202	0.479344	0.516849	0.560838	0.625916	0.690539	0.769367	0.845681	0.984054	1.13771	1.34783	1.85766	14.9838	53.9378
0.0708434	0.122967	0.175345	0.224557	0.26331	0.300537	0.345132	0.382905	0.432069	0.479457	0.517144	0.560936	0.625963	0.690787	0.770014	0.846007	0.984314	1.13838	1.34785	1.86304	15.1741	55.0433
0.070865	0.122999	0.175561	0.224576	0.26335	0.30065	0.345228	0.383111	0.432118	0.479758	0.517538	0.561031	0.626444	0.690859	0.771556	0.846807	0.984375	1.13853	1.34972	1.86636	15.3749	55.499
0.0709094	0.123044	0.175589	0.224625	0.263596	0.30071	0.345377	0.383133	0.432312	0.479873	0.518198	0.561143	0.626586	0.691427	0.772064	0.847069	0.984375	1.13895	1.35076	1.8715	15.4766	55.8771
0.0709864	0.123189	0.175696	0.224789	0.263602	0.300985	0.345493	0.38326	0.432744	0.48004	0.518991	0.562764	0.627163	0.692182	0.772281	0.847145	0.984375	1.13932	1.35186	1.87419	15.7524	56.1334
0.0710991	0.123313	0.175734	0.224891	0.263621	0.301139	0.34569	0.383311	0.433931	0.480185	0.519417	0.563861	0.627263	0.693127	0.774309	0.848437	0.984375	1.14184	1.35247	1.88783	15.9471	56.6289
0.0711523	0.12349	0.175871	0.224989	0.26373	0.30116	0.345692	0.38363	0.434211	0.48024	0.5195	0.564469	0.627479	0.693151	0.775104	0.848577	0.984375	1.14216	1.35469	1.88811	16.0312	56.7116
0.0711595	0.123506	0.175937	0.225006	0.264124	0.301308	0.345765	0.383799	0.434279	0.4805	0.520294	0.564482	0.628143	0.693225	0.775632	0.848624	0.984375	1.14408	1.35977	1.88828	16.4355	56.7676
0.0711974	0.123545	0.17599	0.225202	0.264228	0.301732	0.346	0.38409	0.434411	0.480553	0.521083	0.56455	0.628156	0.693499	0.776064	0.849723	0.984375	1.14531	1.36243	1.92205	16.4909	57.0471
0.0712391	0.123719	0.176146	0.22526	0.264236	0.301854	0.34612	0.38422	0.434431	0.480767	0.521105	0.564759	0.628253	0.693592	0.77622	0.850381	0.984375	1.14665	1.3646	1.92205	16.9563	57.1485
0.0712458	0.123734	0.176156	0.225273	0.264343	0.302086	0.34614	0.384394	0.434635	0.480893	0.521533	0.564838	0.628387	0.693944	0.776558	0.854021	0.985526	1.14855	1.36474	1.93731	16.9835	57.3734
0.0712748	0.123761	0.176185	0.225467	0.264785	0.302102	0.346288	0.38455	0.434832	0.481316	0.521636	0.565402	0.628986	0.693967	0.776933	0.854063	0.985704	1.14942	1.36515	1.95374	17.0143	57.485
0.0714056	0.123843	0.176308	0.225683	0.264791	0.302115	0.346355	0.384788	0.435036	0.481405	0.521817	0.566292	0.629521	0.694018	0.777662	0.854847	0.986087	1.14943	1.36546	1.96337	17.2941	57.4932
0.0714785	0.123904	0.176594	0.225697	0.26494	0.302188	0.346416	0.385051	0.435219	0.481407	0.522094	0.566395	0.6296	0.694329	0.777707	0.855649	0.986901	1.14981	1.36582	1.96875	17.8714	59.7296
0.0715707	0.124068	0.176724	0.225821	0.264983	0.3022	0.346726	0.385457	0.435234	0.4816	0.522238	0.566775	0.629708	0.694755	0.777782	0.856086	0.98714	1.15013	1.36784	1.96875	18.1895	60.1333
0.0715817	0.12409	0.176826	0.225958	0.265112	0.302205	0.346774	0.385482	0.435344	0.481678	0.522637	0.567056	0.629812	0.694827	0.777823	0.856148	0.987921	1.1503	1.36842	1.97511	19.2265	61.2155
0.0716629	0.124166	0.176833	0.226112	0.265261	0.302261	0.346829	0.38549	0.435376	0.481867	0.522822	0.567377	0.62989	0.695159	0.777853	0.856298	0.989643	1.15101	1.37126	1.98407	19.9961	64.0255
0.0717113	0.124183	0.176876	0.226129	0.265352	0.302311	0.347138	0.385574	0.435629	0.481952	0.523425	0.567746	0.629931	0.695875	0.778014	0.856929	0.990013	1.15272	1.38313	1.98407	21.7179	66.4926
0.0717353	0.124184	0.176923	0.226228	0.265392	0.302441	0.347227	0.38571	0.436069	0.481959	0.524059	0.567924	0.62995	0.696034	0.778217	0.857525	0.990365	1.15283	1.38417	1.98438	21.8159	68.2203
0.071748	0.124273	0.177032	0.226505	0.265401	0.30259	0.347397	0.385801	0.436422	0.482328	0.524136	0.568103	0.630347	0.696058	0.778217	0.858172	0.99038	1.15334	1.39615	1.98438	21.989	68.954
0.071748	0.124525	0.177095	0.226539	0.265679	0.302882	0.347427	0.386363	0.436452	0.48245	0.524173	0.568307	0.631359	0.696058	0.778217	0.858597	0.991904	1.15648	1.39652	1.98438	22.8817	69.6184
0.071748	0.124559	0.177242	0.226826	0.265818	0.30304	0.348029	0.386376	0.43657	0.48247	0.524228	0.568391	0.631362	0.696058	0.778217	0.858662	0.995104	1.15677	1.39772	1.9934	23.3121	70.4798
0.0717946	0.124567	0.17725	0.226909	0.266053	0.303222	0.348029	0.386611	0.436708	0.482743	0.524238	0.568725	0.632241	0.696058	0.778217	0.858711	0.997486	1.15847	1.39967	2.00754	24.0125	74.8518
0.0717946	0.124586	0.177354	0.227096	0.266057	0.303314	0.348029	0.386619	0.43672	0.482936	0.524334	0.568923	0.632771	0.696058	0.778217	0.859618	0.998396	1.15915	1.40017	2.02629	24.0644	79.6094
0.071838	0.124739	0.177404	0.227222	0.26623	0.303333	0.348029	0.386791	0.436891	0.483107	0.524344	0.568978	0.633461	0.696058	0.778217	0.860677	1.00032	1.15954	1.40625	2.02934	24.5994	80.3234
0.0718657	0.125012	0.177498	0.22724	0.266332	0.303375	0.348029	0.38693	0.437442	0.483112	0.524633	0.56945	0.63348	0.69643	0.778217	0.860717	1.00067	1.16297	1.40625	2.05046	24.6799	81.0319
0.0718699	0.125179	0.177597	0.227251	0.266602	0.303422	0.348029	0.387257	0.437486	0.483524	0.52493	0.569525	0.63391	0.6965	0.778299	0.862967	1.00068	1.16322	1.41057	2.05803	24.88	81.3317
0.071875	0.125193	0.177606	0.227348	0.266734	0.303584	0.348029	0.387315	0.437606	0.48354	0.525376	0.569553	0.634034	0.697497	0.778322	0.865288	1.00202	1.16325	1.41482	2.06437	25.2299	82.9878
0.0719504	0.125199	0.177859	0.227467	0.266737	0.303697	0.348029	0.387474	0.43762	0.483619	0.525426	0.569711	0.63455	0.697905	0.779848	0.86704	1.00882	1.16328	1.41523	2.10263	25.8695	83.0726
0.072059	0.12532	0.177979	0.227487	0.26691	0.303807	0.348029	0.387566	0.437635	0.483757	0.525451	0.569885	0.63491	0.698061	0.779992	0.869238	1.00905	1.16742	1.41567	2.11612	26.4481	84.3522
0.0720757	0.125441	0.178034	0.227544	0.267073	0.304719	0.348029	0.387868	0.43799	0.483982	0.525669	0.569987	0.63511	0.698852	0.781991	0.86954	1.00914	1.16779	1.41747	2.13378	26.7793	84.6783
0.0720891	0.125491	0.17804	0.227795	0.267163	0.304724	0.348029	0.387884	0.438189	0.484088	0.525725	0.570618	0.63551	0.698925	0.782151	0.870152	1.01134	1.16857	1.42145	2.13788	26.8922
0.0721898	0.125771	0.178089	0.227884	0.267184	0.304967	0.348029	0.388009	0.438249	0.484128	0.525977	0.570768	0.635525	0.699014	0.782172	0.876705	1.01467	1.16923	1.42445	2.14748	26.9989
0.0721993	0.125789	0.17816	0.227903	0.267276	0.305243	0.348029	0.388497	0.438359	0.484568	0.525977	0.571045	0.635574	0.699185	0.782516	0.877392	1.01467	1.1698	1.43153	2.16882	27.1325
0.0721999	0.125922	0.17822	0.228176	0.267755	0.305405	0.348029	0.388681	0.438616	0.48471	0.526057	0.571103	0.635673	0.699889	0.782536	0.877434	1.01467	1.17141	1.43154	2.17942	27.1948
0.0722186	0.125962	0.178246	0.228219	0.267881	0.305612	0.348029	0.388935	0.438631	0.484717	0.526084	0.571878	0.635771	0.699904	0.782684	0.877588	1.01467	1.17167	1.43157	2.19111	27.4347
0.0722665	0.125994	0.178252	0.228296	0.267919	0.305679	0.348029	0.389121	0.438934	0.484977	0.526707	0.572738	0.636746	0.700022	0.782989	0.878043	1.01467	1.1725	1.43496	2.19387	27.4985
0.07227	0.126198	0.178256	0.2283	0.267936	0.305739	0.348029	0.389333	0.439056	0.485445	0.527412	0.573095	0.636882	0.700245	0.783344	0.878418	1.01467	1.17308	1.43496	2.19438	27.5485
0.0723056	0.126236	0.178262	0.228407	0.26809	0.305762	0.348029	0.389643	0.439226	0.485758	0.527531	0.573213	0.6386	0.700513	0.78394	0.879699	1.01467	1.17487	1.43496	2.1993	27.5511
0.0723166	0.126237	0.178268	0.228413	0.268128	0.305906	0.348029	0.3897	0.439291	0.48592	0.527634	0.573218	0.638612	0.701012	0.784046	0.884107	1.01467	1.17546	1.43958	2.21174	27.9623
0.0723366	0.126263	0.178327	0.228509	0.268135	0.30621	0.348029	0.389713	0.43939	0.486174	0.528472	0.573413	0.638778	0.701135	0.784393	0.884691	1.01467	1.17589	1.44235	2.23242	27.9974
0.0723456	0.126278	0.178531	0.228599	0.268377	0.306269	0.348029	0.389978	0.439476	0.486246	0.528508	0.573466	0.63905	0.701583	0.784393	0.88496	1.01804	1.17602	1.44347	2.34007	28.0732
0.0723518	0.126371	0.178754	0.228651	0.26847	0.306311	0.348029	0.390262	0.439615	0.486437	0.528833	0.574123	0.639842	0.701583	0.784393	0.885191	1.01816	1.17982	1.44486	2.3473	28.0732
0.0724118	0.126399	0.178762	0.228721	0.26852	0.306345	0.348029	0.39029	0.439686	0.486597	0.528847	0.57513	0.639923	0.701684	0.784393	0.885809	1.02008	1.18688	1.44635	2.35318	28.1093
0.0724296	0.126564	0.178867	0.228863	0.268528	0.306348	0.348029	0.390677	0.439764	0.486736	0.52888	0.575168	0.640851	0.701805	0.784585	0.886451	1.02165	1.1924	1.44923	2.39812	28.2821
0.0724316	0.126685	0.178933	0.229079	0.268773	0.306436	0.348029	0.390791	0.439914	0.486778	0.528895	0.575431	0.641057	0.701976	0.784825	0.887021	1.02276	1.19377	1.44969	2.42374	28.3349
0.072454	0.126686	0.17897	0.229117	0.268904	0.306567	0.348029	0.390844	0.440257	0.487143	0.529154	0.57652	0.641511	0.702854	0.786189	0.887304	1.02452	1.19807	1.45508	2.44124	28.4347
0.0724597	0.126695	0.179113	0.229249	0.268956	0.30659	0.348029	0.390917	0.440282	0.487251	0.529481	0.576546	0.64193	0.702979	0.78646	0.887304	1.02579	1.1997	1.45537	2.44298	28.927
0.0724775	0.126698	0.179115	0.229254	0.268972	0.307123	0.348029	0.390952	0.440363	0.488064	0.529708	0.576605	0.642109	0.703271	0.786527	0.887304	1.02618	1.20126	1.45882	2.45937	29.0331
0.0724912	0.126699	0.179154	0.2293	0.268977	0.307138	0.348029	0.391228	0.440734	0.488101	0.529983	0.57712	0.642733	0.703751	0.786901	0.887304	1.02954	1.20351	1.46478	2.46094	29.2064
0.0725012	0.1268	0.179251	0.229357	0.269051	0.307307	0.348029	0.391462	0.440823	0.488589	0.530323	0.57757	0.643104	0.704533	0.787842	0.887304	1.02973	1.20693	1.46558	2.48047	29.2658
0.0725406	0.126912	0.179283	0.229421	0.269111	0.307542	0.348034	0.391463	0.441064	0.488589	0.530362	0.578185	0.643292	0.705692	0.787959	0.887304	1.03094	1.20722	1.46974	2.52959	29.6096
0.0725489	0.127126	0.179322	0.229807	0.269225	0.307569	0.34811	0.391641	0.441102	0.488711	0.530447	0.578726	0.643451	0.705825	0.788191	0.887304	1.031	1.20917	1.4727	2.58969	29.842
0.0725656	0.127195	0.179369	0.229955	0.269246	0.307634	0.348221	0.392413	0.441312	0.489196	0.530472	0.579799	0.643495	0.705921	0.788365	0.888475	1.03365	1.20946	1.47305	2.64193	30.222
0.0726128	0.127292	0.179426	0.230435	0.2693	0.307709	0.348242	0.392708	0.44172	0.489286	0.530852	0.580054	0.643702	0.705922	0.78852	0.889242	1.03372	1.20998	1.47399	2.69941	30.2627
0.0726849	0.127356	0.179443	0.230517	0.269307	0.308091	0.348418	0.39285	0.441946	0.489503	0.530901	0.580415	0.643926	0.706072	0.789032	0.889397	1.03395	1.21493	1.47465	2.71032	30.427
0.0727253	0.127365	0.179651	0.230596	0.26998	0.308184	0.34863	0.392947	0.44214	0.489579	0.531092	0.580573	0.643929	0.706202	0.789391	0.890895	1.03453	1.21661	1.47634	2.95477	30.7624
0.0727548	0.12741	0.179935	0.230598	0.269982	0.30825	0.349098	0.39304	0.442225	0.489735	0.531277	0.580793	0.644376	0.70623	0.789448	0.89164	1.03495	1.21665	1.47656	3.0278	30.8158
0.0728314	0.127526	0.180109	0.230743	0.270179	0.308791	0.349197	0.39322	0.442298	0.48997	0.531778	0.580948	0.644508	0.706437	0.790396	0.892913	1.03499	1.21965	1.47656	3.04066	31.016
0.0729224	0.127592	0.180173	0.23075	0.270616	0.308892	0.349391	0.393524	0.4428	0.490002	0.531892	0.581132	0.644552	0.706491	0.790917	0.892947	1.0351	1.22071	1.47786	3.10751	31.0379
0.0729903	0.127823	0.180198	0.230762	0.270958	0.309034	0.349751	0.393568	0.442851	0.49004	0.531943	0.581751	0.644653	0.707788	0.791283	0.894346	1.0351	1.22121	1.49045	3.18571	31.0947
0.0730523	0.127866	0.18026	0.230817	0.271065	0.309233	0.349764	0.393585	0.443193	0.490301	0.531961	0.581812	0.64466	0.708	0.791584	0.89595	1.03546	1.22281	1.49336	3.26081	31.2047
0.0730633	0.127881	0.180293	0.230829	0.271089	0.309333	0.350006	0.393872	0.443196	0.490478	0.532008	0.581954	0.644758	0.708621	0.791602	0.896592	1.03838	1.22323	1.49353	3.35318	31.2686
0.0730729	0.127958	0.180332	0.231069	0.271115	0.309553	0.350095	0.394102	0.443306	0.491105	0.532021	0.582085	0.645306	0.708724	0.792179	0.896635	1.03912	1.22349	1.49595	3.36568	31.3855
0.0730816	0.128012	0.18035	0.231083	0.271222	0.309705	0.350514	0.394566	0.443508	0.491346	0.532081	0.582411	0.645368	0.709283	0.792329	0.896676	1.04037	1.22461	1.49693	3.36924	31.5049
0.0731152	0.128028	0.180839	0.23118	0.271546	0.309908	0.350631	0.395198	0.443626	0.491387	0.532332	0.58288	0.645857	0.710318	0.792496	0.89748	1.04105	1.2257	1.49693	3.49473	31.5137
0.0731435	0.12814	0.181011	0.231227	0.27174	0.309959	0.350791	0.395455	0.443755	0.491449	0.532611	0.582914	0.645967	0.710958	0.792594	0.89848	1.0415	1.22574	1.49693	3.59238	31.5576
0.0731632	0.128194	0.181012	0.23128	0.271971	0.310259	0.350791	0.395502	0.44419	0.491746	0.532666	0.583572	0.64651	0.711011	0.79347	0.898826	1.04154	1.22698	1.50217	3.69516	31.7362
0.0731921	0.128263	0.181016	0.231287	0.272467	0.310265	0.350791	0.395584	0.444288	0.49184	0.532771	0.583583	0.646866	0.711307	0.793632	0.898941	1.04164	1.22817	1.50364	3.74845	31.8438
0.0733311	0.128324	0.181023	0.231748	0.272571	0.310286	0.350791	0.395647	0.444467	0.49188	0.532878	0.583663	0.64723	0.711374	0.794201	0.899338	1.04409	1.23047	1.51143	3.88011	31.868
0.0733648	0.128416	0.181131	0.231853	0.272583	0.310628	0.350791	0.396054	0.444585	0.492068	0.534164	0.583875	0.647625	0.711502	0.794446	0.900275	1.04409	1.23047	1.51338	3.90896	31.9365
0.0734931	0.128525	0.181234	0.231894	0.272629	0.310699	0.350791	0.396099	0.444588	0.492188	0.534172	0.58415	0.647744	0.712067	0.794854	0.900304	1.0457	1.23047	1.51608	3.98736	32.5332
0.0735031	0.12855	0.18125	0.232255	0.272779	0.310952	0.350791	0.396205	0.444797	0.492188	0.534259	0.584524	0.647836	0.71403	0.79509	0.900484	1.04637	1.23047	1.52513	4.18021	33.3576
0.0735059	0.128652	0.181324	0.232305	0.272805	0.311322	0.350791	0.396314	0.44506	0.492188	0.534396	0.585017	0.64848	0.714078	0.795743	0.902784	1.04904	1.23068	1.53226	4.18712	33.3929
0.0735397	0.128675	0.181397	0.232522	0.272937	0.311556	0.351081	0.396387	0.445729	0.492188	0.534583	0.585087	0.649086	0.715538	0.795896	0.903236	1.05008	1.23096	1.53658	4.27646	33.8496
0.0736153	0.128722	0.181593	0.23261	0.272964	0.311859	0.351139	0.39639	0.44589	0.492188	0.534685	0.585132	0.649434	0.716112	0.795922	0.903734	1.05098	1.23575	1.5374	4.33768	34.0601
0.0736385	0.128773	0.181597	0.232726	0.273042	0.312293	0.351235	0.396497	0.446467	0.492188	0.534763	0.585217	0.649971	0.717062	0.796226	0.905312	1.05125	1.23661	1.53932	4.40489	34.4567
0.0736734	0.128816	0.181597	0.232965	0.27307	0.312894	0.351472	0.396516	0.446791	0.492188	0.535335	0.585293	0.649993	0.717365	0.796736	0.905434	1.05192	1.23719	1.53962	4.40511	34.795
0.0736988	0.128864	0.1816	0.233026	0.273259	0.312975	0.351597	0.396697	0.446819	0.492188	0.535364	0.585328	0.650104	0.719217	0.797652	0.906253	1.05224	1.23881	1.54074	4.45174	35.0535
0.0737403	0.128882	0.181601	0.233131	0.273428	0.312977	0.351669	0.397275	0.446897	0.492188	0.535489	0.585328	0.650373	0.719738	0.799271	0.906263	1.05226	1.24023	1.54298	4.45554	36.4291
0.0737972	0.128952	0.18172	0.233134	0.27347	0.313391	0.35181	0.397822	0.446906	0.492188	0.535801	0.585828	0.650402	0.721118	0.800402	0.907436	1.05364	1.24122	1.54872	4.48015	36.8305
0.0738743	0.128978	0.181762	0.233217	0.273656	0.313772	0.351989	0.398057	0.447054	0.492188	0.536287	0.585919	0.650411	0.721336	0.801762	0.908258	1.05918	1.24163	1.5497	4.51074	37.4038
0.0739192	0.129054	0.181828	0.233398	0.273715	0.314004	0.35214	0.398071	0.447327	0.492188	0.536382	0.586065	0.651081	0.721387	0.801916	0.908526	1.05961	1.24214	1.55074	4.57376	37.6471
0.0739266	0.129107	0.181938	0.233504	0.273854	0.314188	0.352194	0.398241	0.447361	0.492188	0.537179	0.587294	0.651112	0.722198	0.802167	0.908547	1.06048	1.24247	1.55321	4.59315	37.8778
0.0739275	0.129109	0.182017	0.233827	0.273917	0.314414	0.352432	0.39827	0.44738	0.492188	0.53719	0.587319	0.651712	0.723652	0.803641	0.909102	1.06063	1.2431	1.5544	4.61608	38.2923
0.0739674	0.129212	0.182079	0.233877	0.27393	0.314423	0.352453	0.398502	0.447671	0.492188	0.53719	0.587531	0.652454	0.723842	0.806147	0.910278	1.06076	1.24387	1.55643	4.64296	38.5963
0.0739737	0.129282	0.182168	0.233925	0.274128	0.314448	0.352479	0.398546	0.448331	0.492188	0.537236	0.587673	0.652744	0.724243	0.806637	0.910338	1.06382	1.24636	1.55643	4.67097	38.6056
0.074038	0.129305	0.182211	0.234017	0.274349	0.314623	0.35269	0.398577	0.448425	0.492188	0.537564	0.588244	0.653158	0.724466	0.808474	0.910553	1.06489	1.25064	1.55858	4.69242	39.01
0.0740831	0.129399	0.182264	0.234116	0.274559	0.315035	0.352771	0.398593	0.448515	0.492188	0.537628	0.588659	0.653569	0.725237	0.808556	0.914476	1.06503	1.25175	1.56053	4.80782	39.1996
0.074084	0.129436	0.182327	0.234166	0.274692	0.315218	0.352842	0.399012	0.448891	0.492188	0.537817	0.589185	0.654599	0.725681	0.808797	0.91556	1.0659	1.25396	1.56388	4.81858	39.2018
0.0741761	0.129471	0.182671	0.234213	0.27516	0.315298	0.352989	0.399263	0.449584	0.492188	0.538085	0.58938	0.654665	0.725694	0.809226	0.916147	1.0669	1.25484	1.57335	4.85996	39.332
0.074256	0.129563	0.182828	0.234233	0.275675	0.315303	0.353076	0.399344	0.44985	0.492188	0.538188	0.58989	0.654754	0.725759	0.809597	0.917084	1.06821	1.25484	1.57577	5.08421	39.3901
0.0742882	0.129587	0.182866	0.234303	0.275802	0.315399	0.353101	0.400278	0.45006	0.492188	0.538417	0.590436	0.65482	0.726021	0.809684	0.919292	1.06844	1.25484	1.57577	5.18538	39.4549
0.0743009	0.129609	0.183246	0.234429	0.276059	0.315503	0.353107	0.400411	0.450072	0.492188	0.539024	0.590708	0.655054	0.726333	0.80981	0.92064	1.06898	1.25484	1.57682	5.2525	39.6243
0.0743229	0.129653	0.183251	0.234441	0.276393	0.31558	0.353437	0.400755	0.450237	0.492188	0.539465	0.590986	0.655381	0.726823	0.810103	0.921664	1.06932	1.25484	1.58207	5.29864	39.7342
0.0743432	0.129747	0.183267	0.234485	0.27645	0.315712	0.353664	0.400954	0.45046	0.492265	0.541761	0.591377	0.655971	0.72698	0.810418	0.921978	1.07241	1.25484	1.58301	5.48491	39.888
0.0744034	0.129761	0.183372	0.234623	0.276487	0.315715	0.353721	0.40114	0.450522	0.493001	0.542539	0.591596	0.656618	0.727808	0.810512	0.923709	1.07796	1.25484	1.58574	5.91655	39.936
0.0745175	0.129794	0.183414	0.234626	0.276572	0.315792	0.35374	0.40118	0.450696	0.493252	0.542663	0.591607	0.656905	0.728031	0.81052	0.926778	1.08142	1.25484	1.58827	6.08601	40.2987
0.0745766	0.129796	0.183655	0.234645	0.276683	0.315936	0.353808	0.401279	0.450794	0.493261	0.542721	0.59181	0.657349	0.728062	0.810565	0.926904	1.08147	1.25489	1.60255	6.14292	40.3596
0.0745966	0.129845	0.183806	0.234672	0.276695	0.316038	0.354135	0.401495	0.45095	0.493343	0.542944	0.592427	0.657731	0.729519	0.811253	0.927678	1.08219	1.25667	1.6042	6.37865	40.8809
0.0746742	0.129958	0.183905	0.234679	0.276797	0.316041	0.354805	0.401596	0.451084	0.493755	0.543009	0.592543	0.657742	0.730706	0.812083	0.928064	1.08245	1.25857	1.60713	6.67426	40.9688
0.0747025	0.130133	0.183943	0.234715	0.276924	0.316116	0.354917	0.40187	0.451316	0.493792	0.543416	0.592831	0.657852	0.731218	0.8126	0.928179	1.08246	1.2648	1.60745	6.71272	41.1993
0.0747108	0.130181	0.183957	0.234768	0.276944	0.316611	0.35493	0.402175	0.451342	0.493941	0.543435	0.593015	0.658014	0.731262	0.812654	0.929073	1.08254	1.2716	1.61056	6.87415	42.0678
0.0747186	0.130322	0.184097	0.235017	0.276981	0.316741	0.354967	0.402226	0.451618	0.494376	0.543651	0.593048	0.65805	0.731919	0.814189	0.929548	1.08322	1.27364	1.6157	6.99741	42.0867
0.0747291	0.130335	0.184189	0.235532	0.277115	0.316838	0.354983	0.402717	0.451929	0.494425	0.543989	0.593177	0.658167	0.732271	0.815343	0.929584	1.08383	1.27615	1.6175	7.18231	42.3004
0.074768	0.130447	0.184205	0.23573	0.277584	0.31692	0.355192	0.402912	0.452007	0.494773	0.544345	0.593212	0.658232	0.732708	0.815721	0.930562	1.08613	1.27756	1.61764	7.22727	42.3463
0.0747868	0.130465	0.184293	0.235818	0.277771	0.316975	0.355471	0.403342	0.452217	0.494871	0.544401	0.59323	0.658606	0.732811	0.815995	0.930858	1.08717	1.27756	1.62866	7.44222	42.5518
0.0748392	0.130561	0.184557	0.23583	0.277866	0.31702	0.356014	0.40342	0.45224	0.494894	0.545286	0.593468	0.659713	0.733075	0.816032	0.931541	1.08744	1.27781	1.63165	8.16544	42.7087
0.0748397	0.130577	0.18464	0.235908	0.277996	0.317146	0.35611	0.403691	0.452316	0.494946	0.545403	0.593756	0.659765	0.733813	0.817342	0.932536	1.08803	1.2811	1.63356	8.20973	43.1728
0.0748498	0.130653	0.184804	0.235997	0.278137	0.31758	0.356311	0.403903	0.452829	0.49514	0.545659	0.594727	0.660387	0.733893	0.818751	0.934951	1.0882	1.28117	1.63927	8.77397	43.4601
0.0749209	0.130744	0.184805	0.23635	0.278478	0.317793	0.356663	0.404057	0.452965	0.495989	0.545867	0.594927	0.660742	0.734436	0.819059	0.935765	1.08824	1.28285	1.64113	8.78548	43.5763
0.0749792	0.130807	0.184891	0.236371	0.278532	0.317857	0.356918	0.404668	0.45328	0.49607	0.546139	0.595613	0.66075	0.735195	0.819281	0.935927	1.08971	1.28307	1.64462	8.80828	43.6082
0.0750019	0.130809	0.185051	0.23643	0.278576	0.317923	0.356999	0.404683	0.453309	0.496094	0.546267	0.595703	0.661275	0.735394	0.819368	0.937787	1.08974	1.28437	1.65085	9.07006	43.6289
0.075022	0.130869	0.185141	0.236514	0.278599	0.318013	0.357095	0.404776	0.45429	0.496094	0.5466	0.595908	0.66144	0.736241	0.819698	0.938842	1.09238	1.28487	1.66105	9.1494	43.936
0.075022	0.130972	0.185163	0.236643	0.278665	0.318092	0.35716	0.405156	0.454429	0.496094	0.54667	0.59614	0.661747	0.73683	0.82009	0.942131	1.09359	1.28522	1.6855	9.1539	44.1805
0.0750925	0.131021	0.18523	0.236679	0.278799	0.318478	0.3572	0.405245	0.45454	0.496094	0.547569	0.596161	0.661762	0.737243	0.820306	0.943087	1.09385	1.28727	1.68782	9.16234	44.4043
0.0750977	0.13109	0.185386	0.236873	0.278952	0.31873	0.357235	0.405288	0.45461	0.496094	0.547692	0.597332	0.662168	0.737661	0.820354	0.943779	1.09654	1.28824	1.68997	9.92188	44.6416
0.0750986	0.131186	0.18547	0.236889	0.279288	0.319268	0.357623	0.40531	0.454643	0.496094	0.54772	0.597611	0.662514	0.737675	0.820539	0.945683	1.09782	1.28979	1.7202	9.94919	45.0998
0.0751458	0.131358	0.185568	0.236926	0.279297	0.319571	0.358028	0.405707	0.454913	0.496094	0.548419	0.597787	0.662795	0.737687	0.821683	0.949786	1.10056	1.29067	1.72263	10.4906	45.1122
0.0751489	0.131493	0.18559	0.237078	0.27935	0.319837	0.358273	0.405887	0.455142	0.496094	0.548645	0.597885	0.662976	0.738281	0.822263	0.949892	1.10056	1.293	1.72366	10.6679	45.3169
0.0751527	0.131528	0.185655	0.237148	0.279357	0.319914	0.358304	0.405932	0.455435	0.496094	0.54865	0.597993	0.662976	0.738281	0.823386	0.951154	1.10056	1.29346	1.73345	10.7827	45.9598
0.075182	0.131552	0.185856	0.237436	0.279582	0.319993	0.358333	0.406179	0.455488	0.496094	0.548984	0.598035	0.66306	0.738281	0.824539	0.951766	1.10056	1.29713	1.73633	10.8964	45.9937
0.0751987	0.131859	0.185958	0.237634	0.279651	0.320494	0.35842	0.406181	0.455557	0.496094	0.549531	0.598152	0.66361	0.738281	0.825487	0.953335	1.10056	1.3008	1.73633	11.1335	46.0371
0.0752131	0.131909	0.186276	0.237747	0.280045	0.320694	0.358586	0.406477	0.455949	0.496094	0.549726	0.598284	0.663644	0.738281	0.826484	0.954509	1.10056	1.30095	1.7399	11.4311	46.3323
0.075215	0.13191	0.186453	0.237764	0.280086	0.320871	0.358598	0.406487	0.455969	0.496203	0.550122	0.598411	0.663957	0.738281	0.826725	0.954649	1.10147	1.30997	1.74015	11.6265	46.6767
0.0752198	0.132079	0.186479	0.237992	0.280104	0.32099	0.358608	0.406762	0.455987	0.496739	0.550223	0.600192	0.664072	0.738281	0.82692	0.956027	1.1016	1.31475	1.74015	11.7769	46.8051
0.0752746	0.132094	0.186783	0.238161	0.280115	0.321046	0.358792	0.407198	0.456013	0.496812	0.550282	0.600212	0.664655	0.738281	0.826995	0.959285	1.10239	1.31475	1.74015	11.8686	46.9348
0.0753049	0.13228	0.186924	0.238162	0.280145	0.321337	0.358849	0.407279	0.456065	0.496862	0.550282	0.600438	0.665138	0.738281	0.827478	0.959432	1.10471	1.31526	1.74015	12.207	46.977
0.0753244	0.132434	0.187034	0.238355	0.280195	0.321389	0.359052	0.407354	0.456108	0.497436	0.550282	0.600453	0.665158	0.738281	0.827507	0.961686	1.10523	1.31535	1.74015	12.2927	46.9917
0.075453	0.132526	0.18711	0.2384	0.280253	0.321441	0.359192	0.407491	0.456843	0.497446	0.550282	0.600637	0.665311	0.739216	0.82931	0.962564	1.10606	1.31567	1.74015	12.4543	47.0446
0.0754835	0.132601	0.187117	0.238434	0.280279	0.321556	0.359249	0.408164	0.45724	0.497988	0.550282	0.600689	0.665879	0.739562	0.829583	0.963791	1.10727	1.31748	1.75396	12.6485	47.242
0.0755396	0.132671	0.187187	0.238589	0.280375	0.321593	0.359266	0.408879	0.457432	0.498359	0.550282	0.600822	0.666538	0.740146	0.829889	0.964299	1.10929	1.31793	1.75396	12.9948	47.274
0.075653	0.132784	0.187389	0.238604	0.280397	0.321735	0.359311	0.409812	0.457486	0.498391	0.550282	0.60163	0.667233	0.740534	0.831203	0.96531	1.11022	1.31867	1.75837	13.2073	47.403
0.0757625	0.13283	0.187576	0.238659	0.280447	0.321942	0.359641	0.409927	0.457618	0.499216	0.550282	0.601665	0.668239	0.742782	0.831443	0.965562	1.11185	1.32157	1.77348	13.7235	47.7346
0.0757681	0.132835	0.18762	0.238696	0.280698	0.322127	0.359669	0.410065	0.457924	0.499222	0.550282	0.601972	0.668537	0.742817	0.832668	0.966592	1.11211	1.32187	1.77363	13.7367	47.7493
0.0757845	0.132854	0.187864	0.239054	0.280744	0.322146	0.359792	0.410242	0.45799	0.499329	0.550282	0.60298	0.669633	0.742898	0.83303	0.966764	1.1124	1.32526	1.77461	13.8995	47.7743
0.0758599	0.132859	0.187891	0.239276	0.281046	0.322242	0.359844	0.41046	0.458347	0.499722	0.550282	0.604088	0.669849	0.743204	0.833069	0.970704	1.11293	1.32526	1.78178	13.9169	47.8649
0.0758988	0.132864	0.18813	0.239301	0.281126	0.322384	0.360137	0.410766	0.459412	0.499722	0.550282	0.604129	0.670465	0.743997	0.834748	0.972137	1.11305	1.32526	1.78585	14.0317	48.3948
0.0759873	0.132924	0.188365	0.239433	0.281139	0.322808	0.360137	0.410955	0.459527	0.499748	0.550282	0.604245	0.670578	0.74424	0.835654	0.972383	1.11431	1.32526	1.78869	14.0474	48.6232
0.0759973	0.132959	0.188415	0.239493	0.281247	0.322976	0.360139	0.410993	0.459552	0.500625	0.550282	0.604438	0.670766	0.747401	0.836319	0.973215	1.11669	1.32526	1.79159	14.3698	48.7368
0.076051	0.132998	0.188417	0.239495	0.281644	0.322988	0.360438	0.411458	0.45971	0.50079	0.550282	0.604561	0.672066	0.74788	0.837245	0.973236	1.11788	1.32549	1.79159	14.4595	48.8326
0.0760643	0.133227	0.188671	0.23957	0.281704	0.32311	0.360547	0.411715	0.461173	0.501057	0.550282	0.605215	0.672255	0.748564	0.837533	0.973318	1.12056	1.32611	1.79397	14.599	49.0399
0.0760912	0.133236	0.188783	0.239618	0.281912	0.323239	0.360765	0.412174	0.461224	0.501348	0.550282	0.605411	0.672311	0.749126	0.83803	0.973853	1.1229	1.33031	1.82388	14.6226	49.2701
0.0761111	0.133261	0.18879	0.239733	0.282042	0.323286	0.36082	0.412423	0.461872	0.501513	0.550282	0.605741	0.672575	0.749144	0.838082	0.975805	1.12443	1.3306	1.82835	15.0677	49.3372
0.0761794	0.133311	0.188965	0.239763	0.282095	0.323356	0.360821	0.412689	0.462559	0.501823	0.550282	0.605786	0.67275	0.749674	0.838538	0.97662	1.12473	1.33552	1.86808	15.1309	49.4134
0.0761803	0.133473	0.1891	0.239949	0.282155	0.323438	0.360882	0.41272	0.462674	0.502227	0.550282	0.606913	0.673049	0.749772	0.840758	0.976766	1.12573	1.33577	1.87419	15.2604	49.5146
0.0761941	0.133478	0.189224	0.239971	0.282231	0.323567	0.3611	0.412751	0.463203	0.50232	0.550282	0.608259	0.673094	0.749853	0.840787	0.977623	1.1277	1.33868	1.88266	15.5401	49.744
0.0762232	0.13351	0.189237	0.240152	0.282306	0.323575	0.361339	0.412875	0.463273	0.502413	0.550282	0.608669	0.673176	0.750078	0.84245	0.977648	1.12799	1.34327	1.88695	15.5777	49.8861
0.0762281	0.133513	0.189261	0.240402	0.282401	0.323707	0.361369	0.413169	0.463577	0.50331	0.550404	0.60887	0.67353	0.750993	0.84268	0.978836	1.13551	1.34574	1.8889	15.7856	49.9542
0.0762543	0.13352	0.189361	0.240407	0.282789	0.323713	0.361513	0.41342	0.463588	0.503409	0.550434	0.608944	0.673776	0.751536	0.842865	0.979009	1.13643	1.34966	1.89722	15.8094	50.0158
0.0762864	0.133599	0.189491	0.240514	0.282836	0.323787	0.361591	0.413517	0.463963	0.503557	0.550942	0.609364	0.674631	0.751644	0.843218	0.9796	1.13917	1.35413	1.89954	15.9985	50.1951
0.076299	0.133843	0.189574	0.240553	0.283229	0.324213	0.361734	0.413588	0.463976	0.503575	0.551194	0.609718	0.674683	0.751678	0.843435	0.980184	1.13918	1.3546	1.91512	16.0293	50.1974
0.076315	0.133883	0.189618	0.240753	0.28325	0.324396	0.361787	0.413613	0.464665	0.503721	0.551482	0.611089	0.67492	0.752514	0.844267	0.98025	1.13932	1.35509	1.92205	16.0312	50.3417
0.0763284	0.133889	0.189939	0.240833	0.283277	0.32442	0.361879	0.413692	0.465197	0.503983	0.551916	0.611186	0.675212	0.753062	0.84555	0.981913	1.14053	1.35594	1.93691	16.2335	51.6911
0.0763644	0.1339	0.190211	0.24093	0.283795	0.324604	0.3619	0.413847	0.465212	0.504052	0.552117	0.613144	0.675853	0.75325	0.846029	0.98238	1.14172	1.35942	1.93731	16.2447	51.9525
0.0764165	0.133984	0.190225	0.241003	0.28385	0.32479	0.362663	0.414051	0.465642	0.504085	0.552201	0.613996	0.675969	0.754358	0.847137	0.983592	1.14204	1.36121	1.9394	16.2637	52.0716
0.0764343	0.134092	0.190467	0.241114	0.283869	0.324838	0.362779	0.414092	0.465772	0.504352	0.552422	0.614007	0.676026	0.754866	0.847463	0.983953	1.14383	1.36524	1.96196	16.2769	52.3455
0.0764883	0.134323	0.190475	0.241156	0.284051	0.324921	0.362978	0.414311	0.466374	0.504707	0.554016	0.61436	0.676387	0.754944	0.84815	0.984375	1.14389	1.36585	1.97293	16.9999	52.4265
0.0764897	0.134387	0.190529	0.241193	0.284165	0.324979	0.363373	0.414547	0.466443	0.505136	0.554342	0.615131	0.67648	0.755227	0.848577	0.984375	1.14748	1.36931	1.98381	17.6202	52.4891
0.0765432	0.134406	0.190716	0.241281	0.284356	0.325021	0.363556	0.414634	0.466751	0.506517	0.554356	0.615369	0.676821	0.755237	0.849124	0.984375	1.14795	1.37689	1.98407	17.7488	52.9081
0.0766159	0.134498	0.190721	0.241362	0.28456	0.325346	0.363688	0.414808	0.466957	0.506895	0.554549	0.61543	0.677538	0.757783	0.849207	0.984375	1.14924	1.37704	1.98438	19.0084	53.7064
0.076655	0.13463	0.190788	0.24159	0.284634	0.325441	0.363851	0.415035	0.467591	0.50699	0.55465	0.616074	0.677809	0.758761	0.849319	0.984375	1.14956	1.37791	1.98438	19.4934	53.8125
0.0766629	0.134675	0.190985	0.241637	0.284684	0.325488	0.363912	0.415163	0.467785	0.507159	0.55465	0.616433	0.678621	0.758908	0.850342	0.984375	1.15112	1.37935	2.00938	19.6098	54.0703
0.0766933	0.134753	0.191293	0.241734	0.284835	0.325563	0.363936	0.415465	0.467787	0.507963	0.55465	0.617075	0.679438	0.758931	0.851033	0.984375	1.15151	1.38038	2.03283	20.0252	54.1061
0.0766949	0.134766	0.191343	0.241896	0.28492	0.32566	0.364307	0.415474	0.467814	0.508033	0.55465	0.617158	0.679998	0.759053	0.851265	0.985047	1.15167	1.38039	2.07108	20.2708	54.2515
0.0767285	0.134775	0.191457	0.241974	0.28495	0.325723	0.364352	0.415486	0.468284	0.508228	0.55465	0.6172	0.680057	0.759881	0.852192	0.986391	1.15327	1.38262	2.08269	21.2176	54.5911
0.0768003	0.134938	0.191478	0.242012	0.284975	0.325724	0.3644	0.415696	0.468574	0.50824	0.55465	0.617244	0.680324	0.760976	0.852716	0.987264	1.15339	1.38457	2.08482	21.6029	54.623
0.0768238	0.135015	0.191529	0.242084	0.285349	0.326715	0.364714	0.415839	0.468791	0.508359	0.55465	0.617353	0.680769	0.760995	0.853801	0.987951	1.15599	1.38928	2.08671	22.0149	55.2114
0.0768359	0.135042	0.191702	0.242135	0.285402	0.326882	0.364825	0.416153	0.46917	0.508388	0.55465	0.617477	0.681381	0.761508	0.854717	0.991533	1.15747	1.39117	2.10263	22.217	55.8507
0.0768901	0.135075	0.191774	0.242141	0.285488	0.327166	0.365039	0.416399	0.469183	0.508548	0.55465	0.618152	0.681893	0.76219	0.855315	0.992229	1.15784	1.39214	2.13378	22.2771	55.8914
0.076897	0.135213	0.191879	0.242225	0.285546	0.327203	0.365143	0.417065	0.469198	0.508862	0.55504	0.618863	0.681945	0.762378	0.856039	0.994729	1.16112	1.39228	2.15689	22.8525	56.4285
0.0769014	0.135325	0.19189	0.242248	0.285799	0.327458	0.365315	0.417955	0.469407	0.508973	0.555333	0.6195	0.682172	0.762904	0.857544	0.996626	1.16136	1.39382	2.16652	23.1695	57.4559
0.0769468	0.135381	0.191921	0.242304	0.285951	0.327542	0.365418	0.418005	0.469543	0.508983	0.555522	0.619566	0.6822	0.763729	0.85792	0.998614	1.16357	1.39759	2.18898	23.4844	58.1286
0.0770372	0.135385	0.192007	0.242597	0.286128	0.327695	0.365591	0.418509	0.469875	0.509711	0.556141	0.61957	0.682379	0.764464	0.858516	0.998963	1.16717	1.39913	2.19461	23.9789	59.8248
0.0770395	0.135425	0.192083	0.242718	0.286288	0.327865	0.366499	0.41854	0.470066	0.510476	0.556655	0.619582	0.683401	0.764705	0.859768	0.999335	1.17215	1.40301	2.20458	24.2921	60.3472
0.0770672	0.135483	0.192114	0.242797	0.286606	0.327904	0.367122	0.418769	0.470096	0.510894	0.557599	0.620094	0.683992	0.764753	0.859906	1.0004	1.17328	1.40381	2.21484	24.431	62.3716
0.0771539	0.135493	0.192615	0.243018	0.286692	0.328155	0.36748	0.41921	0.470541	0.51103	0.55784	0.620171	0.68441	0.764815	0.860976	1.0009	1.17366	1.40427	2.21484	24.6875	62.4459
0.0771959	0.135522	0.192795	0.24312	0.286697	0.328274	0.367615	0.419365	0.471214	0.511384	0.557997	0.621193	0.684875	0.765471	0.861867	1.00149	1.17442	1.40493	2.2186	24.7364	64.1456
0.0772133	0.135538	0.193019	0.243177	0.286859	0.328396	0.368004	0.419401	0.471917	0.511518	0.558014	0.621283	0.685175	0.766059	0.862566	1.002	1.17543	1.40614	2.23242	25.1496	65.2614
0.0772167	0.135595	0.193046	0.243293	0.286868	0.328797	0.368029	0.419535	0.472122	0.512306	0.558244	0.621362	0.686136	0.767716	0.862733	1.00316	1.17677	1.40625	2.23578	25.6102	66.0842
0.0772282	0.135792	0.193055	0.243321	0.286875	0.328847	0.36807	0.419595	0.472242	0.512614	0.558292	0.621455	0.686247	0.769779	0.863189	1.0044	1.17996	1.40625	2.27182	25.6294	66.8081
0.0772579	0.135981	0.193252	0.243659	0.28709	0.32891	0.368276	0.419727	0.472299	0.51273	0.558352	0.62198	0.686497	0.769977	0.864715	1.00476	1.18447	1.41634	2.28688	25.811	67.891
0.077292	0.136016	0.193282	0.243721	0.287262	0.329168	0.368777	0.419875	0.472737	0.512864	0.55857	0.62216	0.687534	0.770014	0.866099	1.00591	1.18521	1.41812	2.32164	25.8434	69.8222
0.0773523	0.136125	0.193292	0.243766	0.287473	0.329232	0.368877	0.420102	0.472765	0.512967	0.55861	0.622706	0.687761	0.771253	0.866129	1.00705	1.18617	1.42018	2.34007	25.8695	74.1045
0.077371	0.136184	0.193347	0.243991	0.287642	0.329648	0.369043	0.420153	0.472807	0.513177	0.558724	0.622769	0.689886	0.7713	0.86628	1.01102	1.18617	1.42212	2.35913	25.9976	77.2853
0.0774078	0.136184	0.193428	0.244056	0.287649	0.329654	0.369141	0.420361	0.472921	0.513472	0.559021	0.622881	0.690126	0.771713	0.866693	1.01179	1.18702	1.42312	2.44298	26.5143	77.3246
0.0774367	0.136194	0.193528	0.244285	0.287716	0.329716	0.369327	0.420387	0.473227	0.513746	0.55989	0.62302	0.690233	0.771854	0.867112	1.01201	1.19028	1.42782	2.45554	26.5514	77.4528
0.0774836	0.136259	0.193532	0.24435	0.288154	0.329812	0.369618	0.420871	0.473548	0.513963	0.559998	0.623076	0.690982	0.772106	0.86733	1.01291	1.19162	1.42922	2.49932	26.6521	78.1522
0.0775076	0.136265	0.19377	0.244876	0.28842	0.32994	0.369705	0.421029	0.473878	0.514738	0.56048	0.623116	0.691015	0.772416	0.86768	1.01336	1.1927	1.4347	2.56623	26.8556	78.5212
0.0775147	0.136284	0.193788	0.24488	0.288436	0.329952	0.369723	0.421432	0.4744	0.514778	0.560602	0.623179	0.691237	0.772567	0.867706	1.01396	1.1955	1.43496	2.58969	26.9596	79.9502
0.0775662	0.136306	0.193873	0.244947	0.288486	0.329953	0.369831	0.421488	0.474512	0.515258	0.56066	0.62339	0.691678	0.77336	0.868623	1.01467	1.19859	1.43496	2.63188	27.0118	80.1417
0.0776004	0.136624	0.194065	0.245083	0.288588	0.329976	0.369981	0.422647	0.474633	0.515291	0.560838	0.623547	0.691762	0.773547	0.868792	1.01467	1.19863	1.43496	2.64757	27.2592	81.28
0.0776008	0.136753	0.194072	0.245212	0.289653	0.330134	0.370677	0.422675	0.474685	0.515422	0.560853	0.623834	0.691845	0.774632	0.869586	1.01467	1.20022	1.43626	2.67166	27.348
0.0776055	0.137218	0.194098	0.245328	0.289817	0.330216	0.370704	0.423367	0.474807	0.515431	0.56106	0.624494	0.692548	0.774814	0.870349	1.01467	1.20063	1.43635	2.70231	27.3496
0.077645	0.137292	0.194205	0.245389	0.289922	0.330244	0.37093	0.423417	0.475114	0.515559	0.561086	0.625451	0.693179	0.776212	0.870572	1.01467	1.20091	1.45217	2.72272	27.4978
0.0776637	0.1374	0.194226	0.245416	0.290023	0.330315	0.371121	0.42346	0.475234	0.515589	0.561121	0.625684	0.693765	0.77777	0.871491	1.01467	1.20127	1.45725	2.72708	27.5516
0.0777722	0.137519	0.194265	0.245456	0.290055	0.330327	0.371214	0.423483	0.475769	0.515954	0.561786	0.626118	0.694021	0.778132	0.871567	1.01467	1.20165	1.4582	2.98451	27.8576
0.0777806	0.137586	0.194382	0.245554	0.290282	0.330452	0.371313	0.423485	0.475827	0.516351	0.562085	0.626171	0.694456	0.778205	0.871598	1.01467	1.20311	1.46086	3.0278	28.1782
0.0777915	0.137691	0.194396	0.246094	0.290396	0.330605	0.371557	0.423593	0.47614	0.516566	0.562215	0.62619	0.694824	0.778217	0.872306	1.01467	1.2059	1.46478	3.14342	28.3089
0.0777972	0.137784	0.194427	0.246094	0.290472	0.330856	0.371598	0.423636	0.476165	0.517029	0.562216	0.626507	0.69499	0.778217	0.873624	1.01467	1.20764	1.4649	3.28442	28.3202
0.0778127	0.137836	0.194429	0.246094	0.290521	0.331041	0.371912	0.424256	0.476539	0.51706	0.56261	0.627747	0.695161	0.778217	0.873955	1.01485	1.2077	1.46568	3.33483	28.5124
0.0778357	0.137854	0.194438	0.246094	0.290596	0.331241	0.371962	0.424343	0.477197	0.517143	0.563096	0.628692	0.695217	0.778217	0.875194	1.01651	1.20982	1.46607	3.47775	28.7959
0.0778419	0.137946	0.194565	0.246094	0.290619	0.331277	0.372043	0.424366	0.47723	0.51733	0.56339	0.628742	0.696058	0.778217	0.875336	1.01751	1.21061	1.46978	3.49286	28.8233
0.0779159	0.138011	0.194712	0.246094	0.291098	0.331318	0.372095	0.424393	0.477235	0.517431	0.563591	0.629115	0.696058	0.778217	0.875584	1.01787	1.21085	1.47656	3.53856	29.0215
0.0779651	0.138046	0.194728	0.246094	0.291232	0.33132	0.372182	0.424602	0.477807	0.517768	0.563966	0.629305	0.696058	0.778528	0.8756	1.01795	1.21232	1.48337	3.60768	29.1666
0.0780249	0.13816	0.195184	0.246094	0.291255	0.331365	0.372182	0.424831	0.478105	0.5183	0.564353	0.630155	0.696058	0.77988	0.876353	1.01836	1.214	1.48828	3.69473	29.7098
0.0780537	0.138197	0.195343	0.246094	0.291356	0.331373	0.372566	0.425269	0.478157	0.519159	0.565063	0.630314	0.696058	0.780124	0.876407	1.01885	1.21564	1.49693	3.76462	29.7584
0.0780537	0.138287	0.195378	0.246094	0.291375	0.331445	0.372784	0.425871	0.478305	0.519214	0.565191	0.630605	0.696058	0.781147	0.876931	1.02113	1.21566	1.49693	3.82253	29.935
0.0782103	0.138401	0.195525	0.246094	0.29143	0.331519	0.372785	0.425949	0.478465	0.519233	0.565466	0.631123	0.696058	0.781297	0.877561	1.02192	1.21612	1.49693	3.83501	30.2851
0.0783148	0.138422	0.195582	0.246094	0.291866	0.332072	0.373034	0.426328	0.478724	0.519292	0.56561	0.631928	0.696058	0.781444	0.878244	1.02196	1.22003	1.4979	3.96779	30.5108
0.0784026	0.138747	0.195617	0.246094	0.29191	0.332091	0.373085	0.426399	0.47873	0.519522	0.565774	0.631983	0.696065	0.782183	0.879242	1.02335	1.22121	1.5019	4.0764	30.542
0.0784152	0.138757	0.195697	0.246094	0.291982	0.332307	0.373541	0.426608	0.478883	0.519709	0.566572	0.632205	0.696613	0.782892	0.881406	1.02432	1.22171	1.5093	4.18094	30.5456
0.0784724	0.138773	0.195713	0.246094	0.292098	0.332511	0.373584	0.427101	0.479138	0.520318	0.566694	0.632241	0.696623	0.78318	0.881767	1.02435	1.22273	1.51276	4.2023	30.5981
0.0785189	0.138833	0.195723	0.246094	0.292105	0.332787	0.373825	0.427288	0.479429	0.520427	0.566849	0.632507	0.6973	0.784153	0.881798	1.02579	1.22392	1.51418	4.25626	30.6581
0.0785386	0.138849	0.195821	0.246094	0.292125	0.333414	0.373901	0.427386	0.479493	0.520518	0.566904	0.63251	0.697776	0.784393	0.88191	1.02612	1.22514	1.51448	4.26117	30.806
0.0786296	0.138893	0.196005	0.246094	0.292302	0.333603	0.374094	0.427629	0.479557	0.521482	0.566928	0.632568	0.697931	0.784393	0.882101	1.02958	1.2262	1.52146	4.30552	30.9141
0.078672	0.139155	0.196114	0.246094	0.292666	0.333634	0.374343	0.427753	0.479682	0.522736	0.567183	0.633122	0.698042	0.784393	0.882397	1.03007	1.23034	1.52305	4.31852	31.0645
0.078675	0.139352	0.196311	0.246094	0.292928	0.333828	0.374557	0.427802	0.480175	0.5233	0.567528	0.633716	0.698218	0.784393	0.885868	1.03087	1.23047	1.52847	4.32682	31.1049
0.078682	0.139386	0.196347	0.246094	0.292972	0.334099	0.374715	0.427852	0.480513	0.523656	0.567866	0.634822	0.698342	0.785043	0.886178	1.03212	1.23047	1.5322	4.40264	31.2382
0.0786904	0.139387	0.196504	0.246094	0.293177	0.334397	0.374928	0.427858	0.480531	0.524123	0.568089	0.634825	0.698372	0.785137	0.886438	1.03265	1.23047	1.54319	4.43156	31.3855
0.0787139	0.139456	0.196506	0.246094	0.293519	0.334415	0.375195	0.428007	0.480698	0.524579	0.568256	0.635238	0.70014	0.785574	0.887066	1.03268	1.23047	1.55573	4.51821	31.409
0.0787547	0.139459	0.196515	0.246094	0.293524	0.334647	0.37532	0.42806	0.480793	0.524703	0.568337	0.635421	0.701884	0.786393	0.887208	1.03569	1.23052	1.55643	4.59303	31.615
0.0787884	0.139462	0.196591	0.246094	0.293763	0.334866	0.375336	0.428076	0.48081	0.525078	0.568361	0.635936	0.701954	0.786441	0.887304	1.03595	1.23268	1.55643	4.61414	31.6189
0.0788132	0.139539	0.196826	0.246094	0.293786	0.335	0.375381	0.428079	0.481024	0.525492	0.568512	0.636325	0.701984	0.786765	0.887304	1.03667	1.23637	1.55643	4.62341	31.6968
0.078845	0.139561	0.196881	0.246094	0.293837	0.335115	0.375542	0.428106	0.48113	0.5257	0.56852	0.636679	0.70391	0.786923	0.887304	1.03821	1.23652	1.55643	4.67166	31.7277
0.0788638	0.139566	0.196882	0.246094	0.293981	0.335251	0.375786	0.42844	0.481749	0.52608	0.568725	0.636741	0.704747	0.787155	0.887304	1.03944	1.23698	1.56106	4.70849	32.2335
0.078947	0.139593	0.196921	0.246094	0.29402	0.335346	0.37589	0.428487	0.4819	0.526972	0.568981	0.636779	0.704917	0.78769	0.887304	1.03979	1.23868	1.56181	4.74682	32.4052
0.0791287	0.139638	0.196989	0.246094	0.294118	0.335973	0.376091	0.428491	0.482211	0.527539	0.569048	0.637378	0.7051	0.789689	0.887304	1.0402	1.23982	1.56269	4.84667	33.6137
0.0792426	0.139692	0.197018	0.246094	0.294344	0.336005	0.37669	0.42871	0.482305	0.527668	0.569261	0.637436	0.705482	0.790728	0.887304	1.04029	1.24023	1.56879	5.10689	33.7017
0.0792747	0.139832	0.197054	0.246094	0.294586	0.336145	0.376853	0.429846	0.482363	0.527754	0.569371	0.637885	0.705578	0.791257	0.887304	1.0408	1.24023	1.57505	5.11362	34.3234
0.0793549	0.140014	0.197186	0.246094	0.294671	0.336168	0.376942	0.430173	0.482515	0.527857	0.569404	0.639185	0.705979	0.79325	0.887304	1.04088	1.24023	1.57577	5.17744	34.5144
0.0793628	0.140064	0.197292	0.246094	0.294762	0.336331	0.377295	0.430274	0.483329	0.527956	0.569732	0.639727	0.706189	0.793433	0.889148	1.04268	1.24247	1.57577	5.40075	34.7744
0.0793774	0.140117	0.197338	0.246094	0.29484	0.33634	0.37736	0.430363	0.483405	0.528529	0.569793	0.640314	0.706764	0.793498	0.889823	1.04281	1.24308	1.57577	5.43259	34.7822
0.0794837	0.140157	0.197492	0.246094	0.294867	0.337132	0.377733	0.430425	0.483542	0.528911	0.570508	0.640315	0.707423	0.793759	0.889932	1.04409	1.24437	1.58011	5.49075	35.62
0.0795448	0.140197	0.197804	0.246094	0.294941	0.337155	0.378169	0.43052	0.483808	0.528991	0.571351	0.640518	0.708544	0.794131	0.890334	1.04409	1.24438	1.58241	5.83317	36.6556
0.0795817	0.140264	0.19791	0.246094	0.294944	0.337206	0.378265	0.43063	0.483817	0.529096	0.571517	0.641148	0.709178	0.794455	0.89196	1.04409	1.24519	1.58556	5.85421	36.9089
0.079607	0.14042	0.197939	0.246094	0.294952	0.337245	0.378604	0.430677	0.484619	0.529565	0.571638	0.641211	0.709432	0.795193	0.892015	1.04474	1.24786	1.58827	5.94059	36.9487
0.0796756	0.140425	0.197995	0.246094	0.29515	0.337296	0.378657	0.430959	0.484655	0.529951	0.571853	0.641277	0.710095	0.795591	0.893931	1.04685	1.24911	1.58827	6.0365	37.103
0.0796875	0.140568	0.198087	0.246094	0.295156	0.337573	0.378675	0.430995	0.485206	0.530094	0.572831	0.641331	0.71035	0.795879	0.894346	1.04978	1.25051	1.58892	6.26977	37.3447
0.0797265	0.140577	0.198131	0.246094	0.29534	0.337677	0.378868	0.43101	0.485253	0.530139	0.572927	0.641612	0.710522	0.796748	0.896592	1.05201	1.25077	1.59562	6.31537	37.454
0.0797474	0.140623	0.198232	0.246094	0.295419	0.337746	0.378965	0.43122	0.485498	0.530172	0.573556	0.642017	0.711031	0.79692	0.897792	1.0521	1.25484	1.60002	6.34879	37.4648
0.0797914	0.140629	0.198528	0.246094	0.295454	0.337787	0.379381	0.431251	0.485965	0.530184	0.573651	0.642431	0.711579	0.797453	0.898171	1.05235	1.25484	1.60021	6.38308	37.712
0.0798213	0.140692	0.198535	0.246094	0.295684	0.337799	0.379647	0.431326	0.485974	0.53106	0.574025	0.642666	0.71281	0.797556	0.898599	1.0535	1.25484	1.61496	6.46282	37.9074
0.0798555	0.140699	0.198676	0.246094	0.295689	0.337868	0.379759	0.431518	0.486083	0.531238	0.574894	0.643023	0.712838	0.797619	0.899158	1.0539	1.25484	1.61871	6.59094	37.9285
0.0799038	0.140843	0.198701	0.246094	0.295894	0.337888	0.380028	0.431796	0.486398	0.532759	0.575123	0.643097	0.713283	0.797722	0.902954	1.05538	1.25484	1.62031	6.91154	38.1956
0.0799235	0.141068	0.198795	0.246094	0.295995	0.337894	0.380521	0.43205	0.486663	0.532878	0.575315	0.643436	0.71423	0.79787	0.904137	1.05608	1.25484	1.62237	7.31273	38.2163
0.0799408	0.141086	0.198829	0.246094	0.296079	0.337913	0.380581	0.432415	0.48678	0.533126	0.57571	0.64353	0.714277	0.798546	0.904696	1.05904	1.25484	1.62413	7.42572	38.5711
0.0800331	0.141177	0.198844	0.246094	0.296166	0.337986	0.38066	0.432586	0.487465	0.533153	0.575968	0.644277	0.714426	0.799851	0.90513	1.06027	1.25484	1.62654	7.5106	38.6296
0.0801118	0.141193	0.198847	0.246094	0.296181	0.338004	0.380828	0.432979	0.48766	0.533374	0.57692	0.644495	0.714556	0.800066	0.905722	1.06236	1.25484	1.62684	7.54828	38.6739
0.0801991	0.141207	0.198889	0.246094	0.296211	0.338252	0.381063	0.433131	0.487843	0.534194	0.577068	0.645306	0.715161	0.800428	0.905885	1.06322	1.25545	1.63131	7.81097	39.0064
0.0802161	0.141208	0.198932	0.246094	0.296259	0.338465	0.381357	0.433243	0.488045	0.534385	0.577237	0.646126	0.71544	0.800658	0.90672	1.06362	1.25962	1.63959	8.01993	39.1126
0.0802637	0.141239	0.199061	0.246094	0.296342	0.338671	0.381629	0.433326	0.488214	0.534448	0.577988	0.646918	0.7166	0.800661	0.907472	1.06473	1.25994	1.64133	8.12519	39.5469
0.0802844	0.141322	0.199286	0.246094	0.296525	0.338908	0.381749	0.433344	0.48885	0.534866	0.578015	0.647338	0.716971	0.801232	0.909353	1.06508	1.26407	1.64326	8.27925	39.8876
0.0803733	0.141512	0.199318	0.246094	0.296556	0.339132	0.381848	0.433378	0.488904	0.534932	0.578451	0.64791	0.7171	0.802152	0.910587	1.06732	1.2648	1.64773	8.39994	39.9086
0.0803977	0.141519	0.19936	0.246094	0.296578	0.33953	0.381932	0.43339	0.489387	0.536088	0.578515	0.648033	0.717163	0.80217	0.91099	1.07113	1.26516	1.65085	8.42289	40.0521
0.0804469	0.141631	0.199649	0.246094	0.296602	0.339584	0.381983	0.433413	0.489702	0.536351	0.578706	0.649091	0.71748	0.802237	0.912311	1.0725	1.26531	1.65085	8.52418	40.1538
0.0804476	0.141648	0.19969	0.246094	0.29675	0.339643	0.382232	0.433419	0.489795	0.536654	0.57889	0.650757	0.718367	0.802924	0.913516	1.07373	1.26653	1.65085	8.65779	40.2544
0.0804716	0.141689	0.200093	0.246094	0.296773	0.340032	0.38225	0.434539	0.489985	0.536734	0.57952	0.650966	0.718404	0.803722	0.914983	1.07559	1.27007	1.6588	8.82859	40.9332
0.0805402	0.141714	0.200096	0.246094	0.296868	0.340111	0.382331	0.434787	0.490082	0.5371	0.579581	0.65106	0.718957	0.803987	0.918043	1.07627	1.2704	1.659	9.60077	41.2157
0.0805987	0.1419	0.200136	0.246094	0.297044	0.340208	0.382555	0.43514	0.490195	0.53714	0.580188	0.651655	0.719219	0.804537	0.920276	1.07635	1.2759	1.66601	9.8378	41.3964
0.0806423	0.142014	0.20016	0.246094	0.29734	0.340467	0.382906	0.435441	0.490635	0.53719	0.580507	0.65171	0.719821	0.804598	0.921049	1.08006	1.27812	1.68336	9.94659	41.4687
0.0806454	0.142045	0.200302	0.246094	0.297388	0.340555	0.383154	0.435554	0.490836	0.53737	0.58078	0.65203	0.720072	0.80529	0.922947	1.08117	1.28254	1.68782	10.0971	41.5119
0.0806824	0.142097	0.200445	0.246104	0.297627	0.340934	0.383866	0.435716	0.491475	0.537455	0.581523	0.653004	0.723887	0.805799	0.923668	1.08131	1.2863	1.69134	10.2315	41.5613
0.0807237	0.142249	0.200508	0.246154	0.297892	0.340955	0.383871	0.436169	0.491726	0.537477	0.581881	0.653104	0.724059	0.805819	0.924375	1.08169	1.28642	1.69236	10.3403	41.5709
0.0807446	0.142289	0.200533	0.246248	0.297921	0.341	0.383888	0.436313	0.491758	0.53769	0.581978	0.653536	0.725993	0.806176	0.924577	1.08448	1.28858	1.69538	10.9656	41.6513
0.080975	0.142436	0.200568	0.246891	0.298088	0.341054	0.383952	0.436345	0.491764	0.537936	0.582489	0.654314	0.726983	0.807612	0.92511	1.08461	1.29242	1.72191	10.9841	41.7815
0.0810142	0.142637	0.20058	0.246907	0.298218	0.341057	0.384103	0.436484	0.492108	0.538129	0.58263	0.655366	0.727442	0.808786	0.927639	1.08514	1.29325	1.72266	11.0581	42.1193
0.0810758	0.142679	0.200634	0.247261	0.298235	0.341082	0.384144	0.437263	0.492188	0.538166	0.582634	0.656593	0.727649	0.808873	0.928475	1.08525	1.29346	1.73633	11.0897	42.2651
0.0812081	0.142749	0.200647	0.247337	0.298451	0.341349	0.384533	0.437502	0.492188	0.538407	0.583169	0.656724	0.727758	0.809127	0.9285	1.0876	1.29448	1.7364	11.1069	42.7397
0.0812307	0.142779	0.200798	0.247395	0.298538	0.341387	0.384682	0.437764	0.492188	0.538424	0.583406	0.656768	0.727974	0.809903	0.929612	1.08766	1.2977	1.74015	11.4484	43.2821
0.0812648	0.142801	0.200998	0.247507	0.298644	0.341574	0.385159	0.437874	0.492188	0.538983	0.583663	0.657268	0.728678	0.810464	0.931573	1.08855	1.30034	1.74015	11.9501	43.5785
0.081279	0.142808	0.201182	0.247564	0.29885	0.342135	0.385194	0.438051	0.492188	0.539394	0.583692	0.657564	0.728776	0.810659	0.935171	1.09007	1.30173	1.74944	12.511	43.6234
0.0813324	0.14292	0.201364	0.247792	0.298975	0.342509	0.385652	0.438072	0.492188	0.539586	0.583735	0.657617	0.72947	0.810839	0.93566	1.09691	1.30427	1.75396	12.6805	44.0795
0.0813792	0.142965	0.201443	0.247804	0.299062	0.342572	0.386332	0.438087	0.492188	0.5397	0.584111	0.657718	0.730006	0.810901	0.938947	1.09893	1.30649	1.75396	12.725	44.2044
0.081399	0.143152	0.201507	0.247817	0.299193	0.342673	0.386546	0.438404	0.492188	0.539884	0.585283	0.657818	0.730326	0.811317	0.941555	1.09934	1.30755	1.76053	12.8954	44.2603
0.0814539	0.143233	0.201576	0.248047	0.299279	0.342842	0.386638	0.438941	0.492188	0.539932	0.585631	0.657959	0.731169	0.812481	0.942265	1.10056	1.30915	1.76277	12.9475	44.2881
0.0815579	0.143237	0.201649	0.248047	0.299417	0.343026	0.386664	0.439037	0.492188	0.54183	0.585937	0.657977	0.731364	0.8125	0.942748	1.10056	1.31108	1.76757	13.1596	44.3668
0.0815593	0.143281	0.201678	0.248047	0.299523	0.343641	0.386897	0.439299	0.492188	0.542062	0.58616	0.658352	0.731827	0.812879	0.942996	1.10056	1.31245	1.77461	13.3485	44.6123
0.0816368	0.143399	0.20171	0.248047	0.299894	0.343722	0.386976	0.439674	0.492188	0.542221	0.586642	0.658789	0.732484	0.813037	0.944845	1.10056	1.31475	1.77461	13.7235	44.632
0.0816376	0.143406	0.201749	0.248047	0.300014	0.343859	0.387183	0.439822	0.492188	0.542471	0.586677	0.659096	0.73301	0.813228	0.944969	1.10056	1.31475	1.77461	13.7685	44.6359
0.0816892	0.14341	0.201753	0.248047	0.300241	0.344444	0.387205	0.439974	0.492188	0.542789	0.586866	0.659589	0.733297	0.813817	0.945016	1.10394	1.31586	1.78869	13.7861	44.6624
0.0817331	0.143523	0.201916	0.248047	0.300402	0.345072	0.387212	0.440171	0.492188	0.542824	0.587027	0.659753	0.733581	0.8139	0.945577	1.1061	1.31848	1.79159	13.8045	44.7072
0.0817521	0.143543	0.202015	0.248047	0.300505	0.34523	0.387311	0.440282	0.492188	0.543611	0.587057	0.661559	0.734425	0.814286	0.94627	1.10644	1.3208	1.82849	13.9105	44.7694
0.0817657	0.143563	0.202162	0.248047	0.300951	0.345632	0.387537	0.440454	0.492188	0.543643	0.587148	0.661785	0.734814	0.816337	0.947687	1.10863	1.32187	1.84683	13.9443	45.0446
0.0817818	0.143617	0.202663	0.248047	0.301022	0.345765	0.387555	0.440847	0.492188	0.543741	0.587155	0.662568	0.735235	0.81707	0.947843	1.1087	1.32326	1.87518	13.9701	45.1308
0.0818729	0.143618	0.202897	0.248047	0.301224	0.345811	0.38782	0.440881	0.492188	0.543883	0.587165	0.662779	0.736614	0.817859	0.951677	1.1093	1.32526	1.8799	14.0317	45.1337
0.0820006	0.143645	0.202913	0.248047	0.301344	0.345914	0.387869	0.440976	0.492729	0.544168	0.587306	0.662976	0.737076	0.82019	0.952988	1.11026	1.32526	1.88386	14.3138	45.1461
0.0820529	0.143871	0.202954	0.248047	0.301506	0.345984	0.387883	0.441077	0.492936	0.544176	0.587576	0.663403	0.737664	0.821506	0.953869	1.1109	1.32526	1.8849	14.3913	45.1951
0.0820825	0.144041	0.203087	0.248047	0.301528	0.346157	0.388497	0.441623	0.492978	0.544271	0.58842	0.663568	0.738281	0.822565	0.956027	1.11742	1.32526	1.90215	14.5589	45.2528
0.0820825	0.144059	0.203118	0.248047	0.301699	0.34647	0.388511	0.441658	0.493067	0.544729	0.588996	0.664278	0.738281	0.823821	0.957045	1.11966	1.32526	1.90638	14.6981	45.4263
0.0820825	0.144186	0.203172	0.248047	0.301701	0.346496	0.388992	0.441719	0.493165	0.54529	0.589142	0.664363	0.738281	0.826042	0.95779	1.1199	1.32526	1.91845	14.8041	45.7951
0.0821415	0.14424	0.203223	0.248047	0.301873	0.346609	0.389494	0.442047	0.493284	0.545716	0.58963	0.664759	0.738281	0.826914	0.960886	1.12211	1.32735	1.92846	14.8869	46.09
0.0821434	0.144241	0.203249	0.248047	0.301946	0.346804	0.389891	0.442433	0.493416	0.545849	0.590425	0.664908	0.738281	0.827437	0.963983	1.12287	1.32929	1.93731	14.9385	46.4969
0.0822672	0.144378	0.203274	0.248047	0.302059	0.346898	0.389907	0.442532	0.493687	0.546245	0.590741	0.665292	0.738281	0.828378	0.96553	1.12519	1.33021	1.94544	15.2947	46.5845
0.0822861	0.144518	0.203301	0.248047	0.302087	0.347153	0.389916	0.44276	0.494142	0.546458	0.591434	0.665419	0.738281	0.828908	0.966507	1.1252	1.33045	1.95673	15.3328	46.6633
0.0823508	0.144519	0.20341	0.248047	0.302107	0.347329	0.390218	0.442793	0.49431	0.5466	0.591444	0.666445	0.738281	0.830049	0.967003	1.12695	1.33079	1.96875	15.3484	46.7248
0.0823629	0.144526	0.203475	0.248047	0.302276	0.347411	0.390584	0.443076	0.494347	0.547345	0.592387	0.666791	0.738281	0.830781	0.968067	1.12889	1.33188	1.96875	15.5777	46.8247
0.0824429	0.144683	0.20373	0.248047	0.302508	0.347576	0.390758	0.443255	0.494814	0.54782	0.592419	0.667182	0.738281	0.831587	0.969306	1.1294	1.33346	1.97343	15.7856	46.9867
0.0824951	0.144806	0.203913	0.248047	0.302515	0.347687	0.39082	0.44337	0.494819	0.548044	0.59308	0.667824	0.738281	0.83192	0.970434	1.13038	1.33541	1.97496	15.9702	47.1046
0.0827088	0.144915	0.204269	0.248047	0.302663	0.347694	0.390922	0.443764	0.494954	0.548312	0.594237	0.66809	0.738281	0.833529	0.972076	1.13197	1.33556	1.97767	15.9985	47.1781
0.0827713	0.144953	0.204292	0.248047	0.302803	0.347699	0.39095	0.444322	0.495235	0.548363	0.594765	0.668436	0.739189	0.836422	0.972891	1.13615	1.33577	1.98438	16.2371	47.3419
0.0827754	0.144996	0.204431	0.248047	0.30285	0.347797	0.391127	0.444476	0.496094	0.54899	0.595085	0.668698	0.739562	0.836733	0.973088	1.13852	1.33672	1.98438	16.754	47.3817
0.0828684	0.145008	0.204472	0.248047	0.302999	0.34781	0.391139	0.444501	0.496094	0.549192	0.595168	0.669057	0.739717	0.837255	0.976254	1.13932	1.34042	1.99336	16.9054	47.3969
0.0828985	0.145043	0.204537	0.248047	0.303091	0.348021	0.391375	0.445858	0.496094	0.54959	0.595219	0.669123	0.740012	0.837275	0.97637	1.13975	1.34402	1.99514	17.2886	47.4357
0.0829276	0.145079	0.204903	0.248047	0.303184	0.348029	0.391581	0.446218	0.496094	0.549675	0.595519	0.669642	0.74067	0.838851	0.977623	1.14102	1.34457	1.99982	17.357	47.5007
0.0829662	0.145152	0.204911	0.248047	0.303234	0.348029	0.391605	0.446547	0.496094	0.550256	0.595978	0.670584	0.740845	0.839391	0.97883	1.14104	1.34842	2.00194	17.5132	47.6491
0.0829756	0.145347	0.204938	0.248047	0.30343	0.348029	0.391791	0.446635	0.496094	0.550282	0.59599	0.671023	0.741297	0.840296	0.978982	1.14196	1.34907	2.01182	18.4648	47.6595
0.0830312	0.145373	0.204976	0.248047	0.303442	0.348029	0.392061	0.447183	0.496094	0.550282	0.596221	0.671041	0.741606	0.84103	0.979043	1.14246	1.35203	2.02772	18.8449	47.7129
0.0830401	0.145403	0.20528	0.248221	0.303705	0.348029	0.392101	0.447208	0.496094	0.550282	0.596435	0.671161	0.742602	0.841972	0.981786	1.14275	1.36202	2.07464	19.2431	47.7521
0.0830574	0.145434	0.205367	0.248339	0.303805	0.348029	0.392213	0.447444	0.496094	0.550282	0.596804	0.672104	0.742688	0.842595	0.981981	1.14304	1.37163	2.08837	19.33	48.09
0.0830574	0.145441	0.205641	0.248452	0.303808	0.348029	0.392541	0.44818	0.496094	0.550282	0.596833	0.672192	0.743369	0.842738	0.983832	1.1453	1.3769	2.10263	19.3874	48.717
0.0830702	0.145464	0.205653	0.248622	0.303877	0.348029	0.392892	0.448635	0.496094	0.550282	0.596886	0.672241	0.743593	0.844516	0.984375	1.14696	1.37704	2.13378	19.6654	49.7
0.0833181	0.145511	0.205783	0.248841	0.303946	0.348029	0.392938	0.448787	0.496148	0.550282	0.596909	0.672481	0.743672	0.845242	0.984375	1.14884	1.37883	2.13378	20.3075	49.7036
0.0833245	0.145544	0.205869	0.248923	0.304468	0.348029	0.393355	0.448988	0.49623	0.550282	0.598441	0.672799	0.744141	0.845321	0.984375	1.14951	1.38538	2.14796	20.3277	50.1551
0.0833344	0.145656	0.205877	0.249007	0.304591	0.348029	0.39349	0.449225	0.496353	0.550282	0.598908	0.673923	0.746896	0.845936	0.984375	1.14956	1.38786	2.15536	20.7175	50.5211
0.0834241	0.145692	0.205974	0.249019	0.304787	0.348029	0.39363	0.449403	0.496689	0.550282	0.59924	0.674288	0.747294	0.8462	0.984375	1.15064	1.38984	2.16519	20.8075	50.6438
0.083433	0.145731	0.206132	0.249191	0.304997	0.348029	0.393963	0.449677	0.496851	0.550282	0.59942	0.674469	0.747968	0.847885	0.984375	1.15088	1.39155	2.18782	21.4546	50.6473
0.0835042	0.145749	0.206149	0.249245	0.3051	0.348029	0.394074	0.449912	0.497071	0.550282	0.599664	0.674476	0.748763	0.847914	0.984375	1.15175	1.39212	2.19795	21.6032	50.8941
0.0836271	0.145797	0.20639	0.249246	0.305111	0.348029	0.394452	0.45029	0.49756	0.550282	0.600846	0.674754	0.748798	0.848118	0.984778	1.1547	1.39212	2.28688	21.7392	51.1713
0.0837085	0.145823	0.206498	0.249569	0.305205	0.348029	0.395653	0.450544	0.497624	0.550282	0.601115	0.675759	0.749633	0.848373	0.984883	1.15521	1.39212	2.3074	22.3622	51.2945
0.0837258	0.145846	0.206523	0.249635	0.305341	0.348029	0.395714	0.450818	0.497744	0.550282	0.601312	0.676709	0.749774	0.848577	0.98519	1.15529	1.39212	2.34007	22.4689	51.3001
0.083795	0.146196	0.206725	0.249833	0.305523	0.348029	0.395753	0.451337	0.497796	0.550282	0.601494	0.677004	0.749833	0.849196	0.986854	1.15615	1.39863	2.34924	22.6172	51.6716
0.0838076	0.14647	0.206825	0.250093	0.305601	0.348029	0.395879	0.451366	0.498075	0.550282	0.601544	0.677179	0.750332	0.851175	0.98714	1.15968	1.40625	2.35318	22.6919	52.025
0.0838276	0.146472	0.206904	0.250119	0.305622	0.348029	0.396433	0.451389	0.498355	0.550282	0.602935	0.67747	0.750649	0.851208	0.987169	1.16424	1.40625	2.35795	23.0448	52.2889
0.0839029	0.146477	0.207029	0.25015	0.305752	0.348029	0.396814	0.4515	0.498657	0.550282	0.603226	0.677708	0.75172	0.851848	0.987281	1.16671	1.40669	2.42742	23.2551	52.7109
0.083918	0.146609	0.207083	0.250376	0.305843	0.348029	0.39694	0.451942	0.499135	0.550282	0.603562	0.679402	0.751971	0.853258	0.987335	1.16727	1.40739	2.43038	23.3441	53.1274
0.0839483	0.146663	0.207383	0.250488	0.306021	0.348029	0.397288	0.452697	0.499159	0.550282	0.603728	0.679694	0.752482	0.853399	0.991159	1.17051	1.41234	2.44298	23.4598	53.6236
0.0839789	0.146664	0.207443	0.25072	0.306103	0.348029	0.397413	0.452742	0.499269	0.550282	0.604196	0.680318	0.753369	0.855275	0.991824	1.17328	1.4132	2.48047	23.6114	53.7365
0.0840526	0.146691	0.207503	0.250965	0.306234	0.348029	0.39748	0.453305	0.499506	0.550394	0.605607	0.681556	0.754146	0.855579	0.992188	1.17344	1.41603	2.51955	24.0166	54.3768
0.0842124	0.146692	0.20756	0.251524	0.306605	0.348029	0.39775	0.453332	0.499707	0.550443	0.606203	0.682221	0.754549	0.855964	0.994708	1.17443	1.41811	2.61634	24.1927	54.9133
0.0842476	0.146811	0.207654	0.251565	0.306667	0.348029	0.397851	0.453412	0.499801	0.550614	0.606549	0.682895	0.754977	0.857453	0.995205	1.17463	1.42212	2.72691	24.3667	55.0546
0.0842494	0.146979	0.207755	0.251666	0.306797	0.348029	0.398281	0.453473	0.500086	0.550745	0.606811	0.683676	0.755301	0.858262	0.995786	1.17573	1.42639	2.79103	24.4298	56.2683
0.0843033	0.147078	0.207809	0.251776	0.306893	0.348029	0.398339	0.453482	0.50032	0.551252	0.607494	0.683958	0.755376	0.860777	0.997305	1.17631	1.42757	2.7999	24.4844	58.125
0.0843047	0.147084	0.207878	0.251794	0.307247	0.348029	0.39861	0.453673	0.500715	0.551423	0.608483	0.684833	0.755567	0.86124	0.998074	1.17699	1.42835	2.93012	24.7165	58.1854
0.0843381	0.147469	0.20792	0.251816	0.307417	0.348029	0.398633	0.453834	0.500941	0.551458	0.609102	0.685068	0.756292	0.862072	0.999265	1.17976	1.43063	2.95585	25.0329	60.035
0.0843648	0.147495	0.20797	0.251819	0.307583	0.348029	0.398676	0.45461	0.501	0.551717	0.609297	0.685487	0.756321	0.862547	0.999335	1.18158	1.43496	2.98401	25.1496	60.4578
0.0844325	0.14753	0.208156	0.252132	0.30767	0.348029	0.398777	0.454727	0.501058	0.552139	0.611379	0.685588	0.756942	0.862733	0.99951	1.18801	1.43496	3.17655	25.3275	60.9822
0.0844558	0.147661	0.208187	0.252222	0.307781	0.348029	0.398837	0.454833	0.501123	0.552341	0.611609	0.686118	0.757173	0.862953	1.00012	1.18986	1.43496	3.24882	25.5199	61.1917
0.0844558	0.147745	0.208217	0.252394	0.308101	0.348029	0.398856	0.455065	0.501697	0.553064	0.61184	0.687062	0.759199	0.863798	1.00096	1.19015	1.43635	3.39532	25.6748	62.3891
0.0845364	0.147873	0.208239	0.252402	0.308106	0.348029	0.399019	0.455207	0.501744	0.553485	0.612336	0.687246	0.759499	0.863889	1.00117	1.19247	1.44042	3.44053	25.7562	63.2716
0.0845521	0.147905	0.208247	0.252417	0.308163	0.348029	0.399418	0.455622	0.502357	0.553571	0.612445	0.687294	0.759806	0.864608	1.0012	1.19304	1.44102	3.51141	26.4016	63.5007
0.0846037	0.147937	0.208292	0.252494	0.308186	0.348029	0.399788	0.456063	0.502441	0.553627	0.612598	0.687573	0.76114	0.865853	1.00264	1.19353	1.44307	3.55458	26.412	64.2148
0.0846596	0.148004	0.208399	0.252558	0.308244	0.348029	0.399857	0.456381	0.502493	0.554252	0.612753	0.687632	0.761725	0.867319	1.00297	1.19372	1.44413	3.59164	26.8005	64.7065
0.0846657	0.148082	0.208537	0.25261	0.30825	0.348029	0.399909	0.456411	0.502676	0.554615	0.613145	0.687659	0.761996	0.868138	1.00396	1.19408	1.45003	3.61651	26.8803	65.1823
0.0846741	0.148417	0.208769	0.252629	0.308598	0.348101	0.400014	0.456414	0.502696	0.55465	0.613527	0.687933	0.762687	0.868259	1.0046	1.19659	1.45096	3.68556	27.0341	69.0951
0.0846793	0.14846	0.208935	0.252794	0.308619	0.348125	0.400069	0.456425	0.502717	0.55465	0.614937	0.688974	0.762736	0.871103	1.00513	1.19958	1.45149	3.70839	27.0382	72.6729
0.0847265	0.14847	0.208966	0.253013	0.309146	0.348165	0.400203	0.456441	0.502908	0.55465	0.615496	0.69083	0.76346	0.871421	1.00605	1.20049	1.45224	3.74831	27.0499	73.7086
0.0847667	0.148643	0.20917	0.253291	0.309146	0.348213	0.400344	0.456472	0.502962	0.55465	0.615676	0.690911	0.764017	0.873404	1.00887	1.20063	1.45742	3.87746	27.186	74.391
0.0847725	0.148678	0.209215	0.253567	0.309765	0.34833	0.400386	0.456579	0.503338	0.55465	0.61598	0.691092	0.764315	0.873476	1.00975	1.20074	1.46409	3.99421	27.3257	74.4771
0.0847851	0.148782	0.209337	0.253594	0.309986	0.348409	0.40078	0.457164	0.503483	0.55465	0.616085	0.691954	0.764429	0.873685	1.01467	1.20176	1.46607	4.06781	27.8261	74.7647
0.0848237	0.148791	0.209504	0.253683	0.310166	0.348469	0.400971	0.457371	0.503535	0.55465	0.616567	0.692425	0.766002	0.874233	1.01467	1.20202	1.46997	4.06827	27.9403	75.3129
0.0848738	0.148823	0.209916	0.25369	0.310232	0.348712	0.401153	0.457797	0.503874	0.55465	0.616662	0.692786	0.767623	0.875822	1.01467	1.20344	1.47656	4.127	27.9403	75.4245
0.084881	0.148829	0.210214	0.253873	0.310247	0.348719	0.401394	0.457799	0.504148	0.55465	0.6172	0.693419	0.767865	0.876627	1.01467	1.20488	1.47656	4.12824	27.9623	76.5736
0.0849549	0.149185	0.210308	0.253974	0.310289	0.348852	0.401429	0.45787	0.504297	0.554908	0.617224	0.693465	0.768046	0.876894	1.01467	1.20625	1.47772	4.16154	28.2377	77.0749
0.0850668	0.14923	0.210325	0.254055	0.310352	0.348933	0.401481	0.458022	0.504335	0.555019	0.617252	0.693729	0.768728	0.876959	1.01467	1.21052	1.49424	4.16675	28.3528
0.0850709	0.149243	0.210437	0.25406	0.31042	0.348957	0.401546	0.458434	0.504589	0.555307	0.617312	0.694256	0.76995	0.877275	1.01467	1.21334	1.49693	4.18101	28.5523
0.0851297	0.14926	0.210477	0.254074	0.310783	0.349381	0.401643	0.458443	0.505097	0.555732	0.617809	0.695122	0.770244	0.877632	1.01467	1.21361	1.49693	4.25891	28.9833
0.0852218	0.14928	0.210589	0.254129	0.311131	0.349671	0.401727	0.458646	0.505201	0.55604	0.618206	0.695369	0.771582	0.878192	1.01467	1.21545	1.49693	4.26471	29.0215
0.0852283	0.14956	0.210598	0.254294	0.311423	0.350094	0.401922	0.458739	0.505554	0.556115	0.618278	0.695373	0.773264	0.879101	1.01467	1.21755	1.49906	4.40213	29.0779
0.0852669	0.149617	0.21073	0.254345	0.311534	0.350182	0.40237	0.458768	0.50576	0.556516	0.618436	0.695721	0.774539	0.880109	1.01467	1.22073	1.50457	4.45208	29.1975
0.0852758	0.149667	0.210784	0.254557	0.311601	0.350431	0.402972	0.458975	0.506108	0.556922	0.619358	0.696058	0.77456	0.880185	1.01467	1.22107	1.50675	4.54454	29.3462
0.0853576	0.149713	0.210835	0.254982	0.312003	0.35047	0.403003	0.459421	0.506264	0.557033	0.619472	0.696058	0.775307	0.880933	1.01566	1.22237	1.50881	4.59416	29.3928
0.0853709	0.149949	0.210975	0.255402	0.312079	0.350518	0.403387	0.459759	0.506431	0.557112	0.61958	0.696058	0.775497	0.881839	1.01621	1.2232	1.51432	4.59421	29.3933
0.0853922	0.149987	0.211101	0.25554	0.312202	0.350791	0.403773	0.460077	0.506599	0.557341	0.619945	0.696058	0.775966	0.881856	1.01764	1.22481	1.51647	4.64639	29.4563
0.0854908	0.150034	0.211108	0.255744	0.312362	0.350791	0.403797	0.460091	0.50666	0.557753	0.620785	0.696058	0.777194	0.882229	1.01832	1.2301	1.51913	4.6791	30.1003
0.0854988	0.150074	0.211258	0.256036	0.31258	0.350791	0.403898	0.460146	0.506815	0.557794	0.62169	0.696058	0.77749	0.88317	1.01839	1.23029	1.52007	4.80959	30.2017
0.0855062	0.15011	0.211269	0.256043	0.312728	0.350791	0.403991	0.460257	0.507155	0.558531	0.621891	0.696058	0.777707	0.883314	1.01877	1.23047	1.52168	4.8615	30.3039
0.085532	0.150141	0.211724	0.256102	0.312837	0.350791	0.4041	0.460569	0.507288	0.558984	0.622108	0.696058	0.778217	0.883821	1.01991	1.23047	1.5244	4.94979	30.3948
0.085667	0.150193	0.211875	0.25639	0.312878	0.350791	0.404458	0.460625	0.507365	0.559025	0.622483	0.696058	0.778217	0.887304	1.02059	1.23047	1.52885	5.13402	30.4656
0.0857905	0.150506	0.212134	0.256464	0.312898	0.350791	0.404826	0.461695	0.50779	0.559157	0.623834	0.696058	0.778217	0.887304	1.02132	1.23047	1.529	5.17912	30.542
0.0857954	0.150592	0.21217	0.256465	0.312973	0.350791	0.404832	0.461784	0.50792	0.559509	0.623842	0.696058	0.778217	0.887304	1.02221	1.23047	1.5322	5.26793	30.5511
0.0858075	0.150844	0.21234	0.25651	0.312981	0.350902	0.405102	0.461811	0.508343	0.560044	0.6244	0.696071	0.778217	0.887304	1.02321	1.23047	1.541	5.31422	30.6265
0.085871	0.150913	0.213047	0.256525	0.313051	0.351332	0.405235	0.462005	0.508388	0.560181	0.624781	0.696319	0.778217	0.887304	1.02341	1.23047	1.54732	5.35511	31.0683
0.0858896	0.151028	0.21311	0.256573	0.313123	0.351337	0.405606	0.462075	0.508393	0.56034	0.62483	0.696499	0.778217	0.887304	1.02358	1.23047	1.55643	5.74093	31.2451
0.0860154	0.151045	0.213184	0.256768	0.313439	0.351425	0.405608	0.462213	0.508451	0.56035	0.625432	0.696819	0.778217	0.887304	1.02463	1.23047	1.57497	5.75191	31.3021
0.0860827	0.151047	0.213197	0.257156	0.313447	0.351441	0.405777	0.463275	0.508495	0.560846	0.626139	0.697419	0.778217	0.887304	1.02565	1.23047	1.57577	5.75381	31.306
0.0860984	0.151095	0.21335	0.257178	0.313525	0.351722	0.406076	0.46343	0.509459	0.561298	0.626292	0.697835	0.778217	0.887304	1.02822	1.23047	1.57577	5.93257	31.3672
0.086185	0.151129	0.213419	0.257472	0.313604	0.351846	0.406084	0.464287	0.509534	0.561752	0.626684	0.698098	0.778217	0.887304	1.0293	1.23268	1.58514	6.03209	31.4974
0.0861996	0.15121	0.213429	0.257501	0.313766	0.352196	0.406693	0.464627	0.509718	0.562355	0.626812	0.698409	0.778217	0.887304	1.03063	1.23268	1.58827	6.11695	31.5059
0.0862495	0.151233	0.213556	0.257888	0.313775	0.352585	0.406812	0.465095	0.510052	0.563074	0.626925	0.698565	0.778217	0.887304	1.03329	1.23702	1.58827	6.18602	31.6199
0.0863071	0.151361	0.213596	0.257976	0.313809	0.352875	0.406849	0.465344	0.510226	0.563399	0.627316	0.699392	0.778217	0.887304	1.03342	1.23833	1.58827	6.19185	31.8031
0.0863253	0.151422	0.213663	0.258039	0.313884	0.353142	0.407082	0.46559	0.51027	0.563621	0.627615	0.699819	0.778217	0.887304	1.03407	1.24023	1.59024	6.20216	32.9407
0.0863678	0.151424	0.213713	0.258042	0.313928	0.353233	0.407397	0.465739	0.510325	0.563696	0.62779	0.701457	0.778217	0.887304	1.03407	1.24023	1.5947	6.21178	33.4389
0.0865089	0.151441	0.213755	0.258445	0.313954	0.353282	0.407462	0.46594	0.510571	0.564089	0.629387	0.701583	0.778243	0.887416	1.0349	1.24023	1.59476	6.27524	33.6141
0.08653	0.15149	0.213771	0.258503	0.313995	0.353314	0.407666	0.465974	0.510622	0.564156	0.62954	0.70163	0.778278	0.889017	1.03518	1.24061	1.59679	6.44922	34.8195
0.0866259	0.151502	0.213839	0.258576	0.314339	0.353428	0.407677	0.46611	0.510777	0.56439	0.629834	0.702278	0.779222	0.889347	1.03667	1.24165	1.60918	6.6558	35.1172
0.0866449	0.151525	0.213875	0.258743	0.314524	0.353434	0.407779	0.466268	0.510884	0.564839	0.629892	0.702413	0.779392	0.890954	1.03789	1.24648	1.61056	6.70025	35.3582
0.0866636	0.151636	0.213928	0.258861	0.314689	0.353557	0.407835	0.466987	0.511271	0.564966	0.630825	0.703157	0.78067	0.891242	1.03847	1.24683	1.61966	7.15861	35.3719
0.0867065	0.151735	0.21473	0.259012	0.314768	0.35378	0.407943	0.467131	0.511279	0.565809	0.631101	0.703681	0.780749	0.891772	1.04226	1.25025	1.62046	7.17245	35.7288
0.0867316	0.152017	0.214779	0.259287	0.314845	0.354151	0.408521	0.467167	0.511421	0.567485	0.631715	0.703985	0.78136	0.892535	1.04261	1.25188	1.62785	7.47294	35.9437
0.0867832	0.152152	0.214829	0.259302	0.314909	0.354347	0.408733	0.467616	0.511617	0.5681	0.632068	0.704007	0.78149	0.892698	1.04326	1.25257	1.6311	7.52989	35.9546
0.0868011	0.152184	0.214877	0.259849	0.315318	0.354505	0.409534	0.467631	0.511671	0.568245	0.632076	0.70406	0.782898	0.893903	1.04409	1.25269	1.63135	7.74669	36.0653
0.0868346	0.15228	0.214887	0.259873	0.315346	0.354712	0.410012	0.467942	0.511699	0.568495	0.632379	0.704178	0.784393	0.894346	1.04409	1.25303	1.63261	7.76832	36.2647
0.0869036	0.152463	0.214888	0.259927	0.315383	0.354811	0.410104	0.468013	0.512325	0.568554	0.632788	0.70463	0.784393	0.894808	1.04409	1.25484	1.64083	7.91536	36.2723
0.0869224	0.152469	0.215186	0.260018	0.31556	0.355056	0.410248	0.468123	0.51256	0.568562	0.632991	0.7051	0.784393	0.896592	1.04409	1.25484	1.6467	8.09516	36.3775
0.086942	0.152477	0.215237	0.260024	0.315651	0.355098	0.410363	0.46833	0.51315	0.56872	0.633333	0.706415	0.784393	0.896857	1.04409	1.25484	1.64773	8.33923	36.6775
0.0869941	0.152688	0.215249	0.260359	0.315994	0.355236	0.410556	0.468535	0.513243	0.569005	0.63378	0.706495	0.784393	0.898268	1.04409	1.25484	1.65085	8.41157	36.6791
0.0870067	0.152706	0.215428	0.260365	0.316372	0.355518	0.411072	0.468557	0.513744	0.569048	0.634138	0.706936	0.784718	0.899866	1.04409	1.25484	1.65085	8.47725	36.6825
0.0870073	0.152811	0.215464	0.260371	0.316783	0.355691	0.411389	0.469438	0.513789	0.569517	0.634163	0.708593	0.785249	0.900464	1.04494	1.25484	1.66812	8.89627	36.9599
0.0870073	0.152947	0.21591	0.26063	0.317151	0.355791	0.411439	0.470158	0.51401	0.569615	0.634302	0.709258	0.785472	0.901226	1.04556	1.25484	1.66939	9.27651	36.964
0.087014	0.15295	0.216083	0.260859	0.317216	0.356052	0.412002	0.470432	0.514141	0.569957	0.634962	0.709997	0.786056	0.901617	1.04592	1.25484	1.69441	9.50703	36.9767
0.0871006	0.153039	0.216165	0.260929	0.317624	0.356466	0.412316	0.470658	0.514387	0.570119	0.635456	0.710115	0.786166	0.903481	1.05111	1.25484	1.70456	9.6412	37.1246
0.0871538	0.153055	0.216234	0.260996	0.317909	0.356558	0.412455	0.470786	0.514423	0.570485	0.636388	0.710333	0.787356	0.904794	1.05237	1.25704	1.70457	9.81275	37.2543
0.0871652	0.153066	0.216317	0.261032	0.318098	0.356847	0.412505	0.47106	0.514704	0.570508	0.636493	0.711255	0.787766	0.905969	1.05874	1.2584	1.71075	10.0699	37.947
0.0871687	0.15309	0.21656	0.261218	0.318118	0.357023	0.412636	0.47128	0.515011	0.570538	0.636522	0.712339	0.787789	0.909615	1.05901	1.25909	1.71874	10.1996	38.203
0.0872202	0.153174	0.216569	0.261347	0.318154	0.357094	0.412667	0.471547	0.515372	0.571529	0.637304	0.712369	0.787889	0.91102	1.06071	1.26053	1.72241	10.2486	38.2887
0.0872315	0.153246	0.216668	0.261374	0.318431	0.357106	0.412976	0.47158	0.515783	0.572503	0.637372	0.712476	0.787951	0.912533	1.06107	1.2622	1.72266	10.304	38.4887
0.0872336	0.153255	0.216747	0.261449	0.319033	0.357177	0.413186	0.471686	0.51594	0.573758	0.637961	0.71253	0.788217	0.913312	1.06358	1.26313	1.73185	10.4451	38.6698
0.0872677	0.153268	0.216902	0.261506	0.319133	0.357277	0.413678	0.471703	0.517076	0.574385	0.638274	0.712657	0.788596	0.913551	1.06433	1.2648	1.73633	10.6169	38.874
0.0872931	0.153508	0.216919	0.261877	0.319516	0.357532	0.413706	0.471835	0.517567	0.575168	0.63946	0.712666	0.788707	0.913766	1.06564	1.26799	1.73633	10.6349	38.91
0.0873683	0.153696	0.216964	0.261982	0.319532	0.357586	0.414155	0.471915	0.518428	0.575192	0.640314	0.712969	0.788807	0.913918	1.06586	1.27021	1.74015	10.6493	39.1213
0.0873747	0.153782	0.21736	0.261995	0.320212	0.357741	0.414179	0.472118	0.519891	0.575199	0.640739	0.712985	0.788878	0.914128	1.06721	1.27052	1.74015	10.6961	39.2574
0.0874546	0.153799	0.217642	0.261998	0.320538	0.357777	0.41443	0.472389	0.519969	0.575613	0.640762	0.713006	0.78925	0.914436	1.0681	1.27316	1.74015	11.1784	39.3626
[truncated: 3,030 more rows]
