# Supplementary material for: Long-term intravital imaging of the multicolor-coded tumor microenvironment during combination immunotherapy
Source: eLife. 2016 Nov 18;5:e14756. doi: 10.7554/eLife.14756 (PMC5173323; doi:10.7554/eLife.14756)
Supplement: Figure 5—source data 4. — DOI: http://dx.doi.org/10.7554/eLife.14756.039 [file elife-14756-fig5-data4.xls]

## Sheet: displacement（um）
0	0	0	0	0	0	0	0	0	0	0	0	0	0	0	0	0	0	0	0	0	0	0	0	0	0	0	0	0	0
0	0	0	0	0	0	0	0	0	0	0	0	0	0	0	0	0	0	0	0	0	0	0	0	0	0	0	0	0	0
0	0	0	0	0	0	0	0	0	0	0	0	0	0	0	0	0	0	0	0	0	0.0379066	0.0391195	0.00953046	0.0761299	0.170677	0.143634	0.278428	0.228796	0.314119
0	0	0	0	0	0	0	0	0	0	0	0	0	0	0	0	0	0	0	0	0	0.107221	0.056706	0.0407358	0.124557	0.175991	0.235114	0.285334	0.275789	0.328189
0	0	0	0	0	0	0	0	0	0	0	0	0	0	0	0	0	0	0	0	0.126644	0.123322	0.101818	0.106426	0.12815	0.241444	0.306538	0.356933	0.337002	0.503599
0	0	0	0	0	0	0	0	0	0	0	0	0	0	0	0	0	0	0	0	0.138482	0.138164	0.110602	0.111619	0.167722	0.296637	0.311134	0.380393	0.350146	0.709674
0	0	0	0	0	0	0	0	0	0	0	0	0	0	0	0	0	0	0	0	0.145775	0.149494	0.110972	0.123188	0.18639	0.312468	0.359097	0.401778	0.389288	0.730054
0	0	0	0	0	0	0	0	0	0	0	0	0	0	0	0	0	0	0	0	0.150858	0.150905	0.122686	0.128444	0.198206	0.317232	0.394368	0.4101	0.494104	0.745265
0	0	0	0	0	0	0	0	0	0	0	0	0	0	0	0	0	0	0	0	0.170031	0.151808	0.123642	0.137005	0.274542	0.321198	0.422776	0.463828	0.496094	0.854472
0	0	0	0	0	0	0	0	0	0	0	0	0	0	0	0	0	0	0	0	0.175082	0.153434	0.128147	0.161079	0.281931	0.341501	0.431351	0.464161	0.55465	0.857113
0	0	0	0	0	0	0	0	0	0	0	0	0	0	0	0	0	0	0	0	0.185246	0.15553	0.132288	0.163703	0.293999	0.351238	0.433918	0.496094	0.578551	0.925025
0	0	0	0	0	0	0	0	0	0	0	0	0	0	0	0	0	0	0	0	0.186739	0.156574	0.137294	0.165568	0.296228	0.367854	0.444162	0.502742	0.676687	0.98817
0	0	0	0	0	0	0	0	0	0	0	0	0	0	0	0	0	0	0	0.0603816	0.189429	0.168606	0.140774	0.191672	0.305988	0.37166	0.470385	0.502984	0.679723	1.04641
0	0	0	0	0	0	0	0	0	0	0	0	0	0	0	0	0	0	0	0.0680718	0.190014	0.172568	0.143548	0.205688	0.314133	0.395496	0.475676	0.505308	0.695482	1.079
0	0	0	0	0	0	0	0	0	0	0	0	0	0	0	0	0	0	0	0.0794979	0.190337	0.174293	0.146092	0.222722	0.314487	0.400103	0.476674	0.526273	0.724401	1.19542
0	0	0	0	0	0	0	0	0	0	0	0	0	0	0	0	0	0.0479034	0	0.103939	0.19053	0.179773	0.18593	0.225614	0.323341	0.402516	0.493511	0.530696	0.730113	1.24023
0	0	0	0	0	0	0	0	0	0	0	0	0	0	0	0	0	0.0508733	0	0.112746	0.191842	0.182912	0.194226	0.248047	0.339351	0.405117	0.496094	0.55465	0.767975	1.24023
0	0	0	0	0	0	0	0	0	0	0	0	0	0	0	0	0	0.0621852	0.0587338	0.112914	0.195922	0.189429	0.2016	0.248047	0.371331	0.405311	0.506343	0.55465	0.774214	1.24023
0	0	0	0	0	0	0	0	0	0	0	0	0	0	0.0436478	0	0.0592719	0.0648956	0.0791705	0.11832	0.200791	0.19579	0.206903	0.248223	0.378128	0.418551	0.51076	0.59853	0.793653	1.24023
0	0	0	0	0	0	0	0	0	0	0	0	0	0	0.0450985	0	0.0666329	0.0790687	0.0996211	0.129305	0.210843	0.212302	0.222665	0.263707	0.383828	0.427194	0.51726	0.603874	0.794143	1.31246
0	0	0	0	0	0	0	0	0	0	0	0	0	0	0.0482744	0	0.0736842	0.0923258	0.10282	0.132514	0.215592	0.213024	0.227255	0.268265	0.412238	0.430734	0.523893	0.60896	0.814457	1.32579
0	0	0	0	0	0	0	0	0	0	0	0	0	0	0.0654497	0	0.0892911	0.106193	0.105801	0.137555	0.22082	0.229143	0.245223	0.273781	0.413614	0.457557	0.525058	0.643392	0.818042	1.41274
0	0	0	0	0	0	0	0	0	0	0	0	0	0	0.0678443	0.0187538	0.0899627	0.106288	0.108192	0.155199	0.2248	0.230547	0.248047	0.315332	0.415945	0.473937	0.525507	0.656289	0.87783	1.4128
0	0	0	0	0	0	0	0	0	0	0	0	0	0	0.0714444	0.0302914	0.0948681	0.112223	0.118036	0.160312	0.228841	0.231299	0.248047	0.322112	0.425027	0.477759	0.540029	0.665151	0.880688	1.54246
0	0	0	0	0	0	0	0	0	0	0	0	0	0	0.0721613	0.0304676	0.0953692	0.112777	0.118776	0.169609	0.2353	0.232912	0.248047	0.328656	0.429325	0.494912	0.547544	0.678061	0.881155	1.62869
0	0	0	0	0	0	0	0	0	0	0	0	0	0	0.0749193	0.0581959	0.0998126	0.117821	0.120244	0.190712	0.236309	0.236309	0.248047	0.375324	0.430289	0.496094	0.55465	0.68695	0.90719	1.75396
0	0	0	0	0	0	0	0	0	0	0	0	0	0	0.0807325	0.060249	0.106754	0.119151	0.124812	0.196962	0.23837	0.239064	0.259761	0.379617	0.439837	0.506469	0.565708	0.69699	0.931884	1.75396
0	0	0	0	0	0	0	0	0	0	0	0	0	0	0.106062	0.074396	0.110568	0.133665	0.126877	0.197552	0.243959	0.248047	0.268079	0.397689	0.442378	0.512861	0.569273	0.704943	0.943934	1.75396
0	0	0	0	0	0	0	0	0	0	0	0	0	0	0.112137	0.078271	0.112056	0.142255	0.138397	0.197788	0.248047	0.248047	0.281007	0.404339	0.450238	0.519727	0.57983	0.722943	0.948384	1.76236
0	0	0	0	0	0	0	0	0	0	0	0	0	0	0.119327	0.0830711	0.112552	0.144642	0.139972	0.201988	0.248047	0.248047	0.283157	0.406212	0.455917	0.536489	0.581649	0.732805	0.96067	1.79595
0	0	0	0	0	0	0	0	0	0	0	0	0	0	0.12328	0.08521	0.115442	0.155199	0.14466	0.202506	0.248047	0.248047	0.286104	0.410151	0.462957	0.542712	0.582646	0.772705	0.970716	1.8335
0	0	0	0	0	0	0	0	0	0	0	0	0	0	0.125111	0.107669	0.123254	0.157491	0.153932	0.203953	0.248047	0.248047	0.28653	0.410867	0.46747	0.545265	0.600376	0.77767	0.974711	2.08678
0	0	0	0	0	0	0	0	0	0	0	0	0	0	0.126158	0.11665	0.128494	0.167546	0.155199	0.208023	0.248047	0.248047	0.288462	0.430892	0.467783	0.546303	0.613414	0.784393	0.977238	2.10619
0	0	0	0	0	0	0	0	0	0	0	0	0	0	0.127624	0.118802	0.130656	0.167944	0.156337	0.209046	0.248047	0.248047	0.290888	0.432969	0.475523	0.550525	0.635007	0.790874	0.992188	2.20734
0	0	0	0	0	0	0	0	0	0	0	0	0	0	0.127894	0.123954	0.140676	0.169609	0.158471	0.209885	0.248047	0.250148	0.316611	0.437824	0.48411	0.551368	0.64744	0.792459	0.992188	2.24131
0	0	0	0	0	0	0	0	0	0	0	0	0	0	0.134573	0.129432	0.147744	0.173026	0.160284	0.213613	0.248047	0.263966	0.3177	0.446995	0.496094	0.55465	0.672484	0.797101	0.992188	2.26263
0	0	0	0	0	0	0	0	0	0	0	0	0	0	0.135342	0.130824	0.154211	0.175781	0.162854	0.216957	0.248047	0.275016	0.325311	0.447796	0.496094	0.55465	0.677066	0.819018	0.996726	2.26639
0	0	0	0	0	0	0	0	0	0	0	0	0	0.0194827	0.136469	0.136676	0.163466	0.177321	0.165964	0.226626	0.248516	0.277306	0.326498	0.447854	0.49933	0.557288	0.677326	0.82868	1.01396	2.29148
0	0	0	0	0	0	0	0	0	0	0	0	0	0.0370247	0.148929	0.146336	0.163557	0.182393	0.169609	0.243098	0.251074	0.279063	0.354463	0.449597	0.5023	0.56826	0.696635	0.838964	1.01696	2.45003
0	0	0	0	0	0	0	0	0	0	0	0	0	0.0462168	0.1538	0.160435	0.163633	0.183081	0.176084	0.246557	0.256157	0.29337	0.357634	0.460116	0.512188	0.572674	0.712273	0.851271	1.02926	2.46024
0	0	0	0	0	0	0	0	0	0	0	0	0	0.0558612	0.158101	0.161395	0.164326	0.186018	0.177443	0.247336	0.259157	0.3008	0.362158	0.471682	0.522906	0.578059	0.716439	0.868922	1.064	2.48047
0	0	0	0	0	0	0	0	0	0	0	0	0	0.0583065	0.159705	0.162294	0.168887	0.187154	0.180524	0.247678	0.259263	0.312289	0.371952	0.476936	0.537113	0.582941	0.718757	0.891706	1.0876	2.48047
0	0	0	0	0	0	0	0	0	0	0	0	0	0.0602219	0.16568	0.163731	0.169025	0.188715	0.184331	0.248047	0.262766	0.316264	0.375065	0.479452	0.540008	0.582976	0.726387	0.901597	1.12486	2.77325
0	0	0	0	0	0	0	0	0	0	0	0	0.0393068	0.0620992	0.168769	0.164929	0.172963	0.188817	0.186862	0.248047	0.26318	0.326498	0.385611	0.482511	0.542741	0.617232	0.739822	0.902095	1.12872	2.77325
0	0	0	0	0	0	0	0	0	0	0	0	0.0571526	0.0713501	0.176069	0.168598	0.17633	0.195833	0.188715	0.248047	0.263935	0.335504	0.3896	0.48839	0.55465	0.649128	0.767054	0.908397	1.12965	2.77325
0	0	0	0	0	0	0	0	0	0	0	0	0.0734154	0.0825435	0.176808	0.172623	0.177008	0.197711	0.193214	0.248047	0.267833	0.336251	0.393712	0.489671	0.55465	0.662363	0.76769	0.916894	1.16899	2.77325
0	0	0	0	0	0	0	0	0	0	0	0	0.0816044	0.0890364	0.182429	0.173183	0.183693	0.200505	0.195245	0.248047	0.269937	0.338963	0.404466	0.490179	0.568888	0.662886	0.779085	0.917676	1.19235	2.77325
0	0	0	0	0	0	0	0	0	0	0	0	0.0868965	0.0891833	0.183436	0.173484	0.187971	0.204034	0.19696	0.248047	0.270747	0.348297	0.412288	0.490914	0.573792	0.666163	0.784393	0.923303	1.219	2.77325
0	0	0	0	0	0	0	0	0	0	0	0	0.092739	0.103687	0.189283	0.175341	0.190926	0.209531	0.208647	0.248047	0.271415	0.350791	0.423337	0.49106	0.575568	0.67032	0.784393	0.924754	1.23285	2.77325
0	0	0	0	0	0	0	0	0	0	0	0	0.0958807	0.104845	0.19347	0.177288	0.214244	0.214236	0.210402	0.248047	0.275166	0.354648	0.425559	0.496094	0.583211	0.671188	0.785768	0.925822	1.24023	2.77325
0	0	0	0	0	0	0	0	0	0	0	0	0.0974203	0.110995	0.195029	0.183135	0.214313	0.214874	0.2123	0.248047	0.28506	0.360702	0.42581	0.496094	0.587764	0.681287	0.790476	0.932691	1.24023	2.77325
0	0	0	0	0	0	0	0	0	0	0	0	0.103564	0.11121	0.198731	0.186115	0.215137	0.219036	0.214295	0.248047	0.291273	0.364946	0.426757	0.496094	0.608057	0.694433	0.809193	0.935039	1.24023	2.89498
0	0	0	0	0	0	0	0	0	0	0	0	0.115295	0.116654	0.202012	0.18892	0.215706	0.221297	0.216957	0.248047	0.295295	0.374036	0.432032	0.496094	0.622299	0.699228	0.812281	0.936075	1.24023	3.32325
0	0	0	0	0	0	0	0	0	0	0	0	0.125573	0.12002	0.202182	0.194771	0.216118	0.224274	0.219048	0.252425	0.304288	0.37616	0.442008	0.503051	0.626931	0.700075	0.812598	0.942279	1.24023	3.4085
0	0	0	0	0	0	0	0	0	0	0	0	0.128779	0.127736	0.205562	0.19761	0.218189	0.226131	0.222376	0.252849	0.30588	0.377485	0.442016	0.504546	0.629133	0.70749	0.828174	0.946345	1.24023	3.50791
0	0	0	0	0	0	0	0	0	0	0	0	0.131717	0.12931	0.207071	0.204012	0.218362	0.229608	0.224293	0.253323	0.307496	0.385538	0.44957	0.509624	0.633768	0.710707	0.830932	0.947569	1.2648	3.60175
0	0	0	0	0	0	0	0	0	0	0	0	0.138768	0.13031	0.216972	0.204555	0.218509	0.231583	0.227333	0.25475	0.309674	0.390796	0.458143	0.514983	0.634197	0.711465	0.832184	0.958386	1.2648	3.68169
0	0	0	0	0	0	0	0	0	0	0	0	0.151615	0.136329	0.217531	0.207984	0.224927	0.231937	0.229004	0.255872	0.334939	0.39186	0.463753	0.517945	0.646981	0.712014	0.835925	0.961763	1.2648	3.7207
0	0	0	0	0	0	0	0	0	0	0	0	0.152508	0.145204	0.217589	0.209611	0.225851	0.232565	0.229363	0.256157	0.339508	0.394221	0.488036	0.530132	0.649048	0.714309	0.843267	0.963041	1.2648	3.7207
0	0	0	0	0	0	0	0	0	0	0	0	0.158237	0.146018	0.218098	0.212882	0.226782	0.236021	0.231303	0.256551	0.34242	0.399448	0.488387	0.531344	0.650156	0.716889	0.843689	0.975046	1.2916	3.72181
0	0	0	0	0	0	0	0	0	0	0	0	0.1616	0.148694	0.219142	0.216207	0.228594	0.244372	0.231909	0.256642	0.344605	0.400852	0.48957	0.536797	0.652645	0.723123	0.858503	0.97859	1.30265	3.74909
0	0	0	0	0	0	0	0	0	0	0	0	0.163395	0.157513	0.220793	0.216402	0.229399	0.248044	0.232225	0.256882	0.345648	0.408378	0.492519	0.539951	0.676517	0.733078	0.863636	0.983179	1.3074	3.92197
0	0	0	0	0	0	0	0	0	0	0	0	0.16516	0.159851	0.222982	0.217354	0.229616	0.248047	0.232779	0.257664	0.345956	0.414955	0.494755	0.542971	0.677534	0.734549	0.867038	0.992188	1.31758	4.06519
0	0	0	0	0	0	0	0	0	0	0	0	0.165301	0.162043	0.223257	0.220068	0.234032	0.248047	0.233254	0.258637	0.347073	0.432032	0.496094	0.548252	0.678869	0.739723	0.867613	0.992188	1.32015	4.42441
0	0	0	0	0	0	0	0	0	0	0	0	0.165443	0.16481	0.228749	0.221745	0.247449	0.248047	0.233273	0.265547	0.348297	0.446732	0.496094	0.54855	0.681994	0.744362	0.868562	0.992188	1.3228	4.47173
0	0	0	0	0	0	0	0	0	0	0	0.0361326	0.167106	0.174366	0.23081	0.227976	0.248047	0.248047	0.235525	0.270247	0.350791	0.447044	0.496094	0.549443	0.683467	0.753509	0.877865	0.992188	1.33557	4.54761
0	0	0	0	0	0	0	0	0	0	0	0.039995	0.172163	0.178678	0.231183	0.23041	0.248047	0.248047	0.237499	0.270645	0.351312	0.44859	0.496094	0.554125	0.688929	0.755223	0.885843	0.992188	1.34716	5.15402
0	0	0	0	0	0	0	0	0	0	0	0.0459585	0.17342	0.179533	0.231366	0.232475	0.248047	0.248047	0.243633	0.279568	0.355952	0.449657	0.496094	0.55465	0.689412	0.768833	0.891446	0.994986	1.3502	5.37638
0	0	0	0	0	0	0	0	0	0	0	0.0528696	0.173653	0.180184	0.237346	0.237349	0.248047	0.248047	0.248047	0.279978	0.359916	0.458887	0.496094	0.55465	0.69332	0.774074	0.894346	0.995896	1.37002	5.37767
0	0	0	0	0	0	0	0	0	0	0	0.0559725	0.17405	0.182056	0.237865	0.248047	0.248047	0.248047	0.248047	0.281114	0.363779	0.460516	0.496094	0.562646	0.694105	0.775398	0.89652	1.0088	1.37071	5.62669
0	0	0	0	0	0	0	0	0	0	0	0.064519	0.177237	0.183234	0.240722	0.248047	0.248047	0.248047	0.248047	0.282546	0.364754	0.462119	0.496094	0.570387	0.694365	0.782268	0.902773	1.03962	1.38456	6.20117
0	0	0	0	0	0	0	0	0	0	0	0.0701013	0.177656	0.183803	0.243182	0.248047	0.248047	0.248047	0.248047	0.284558	0.364838	0.467144	0.496094	0.580554	0.697277	0.784393	0.906021	1.04857	1.38487	6.67887
0	0	0	0	0	0	0	0	0	0	0	0.0708401	0.179503	0.183895	0.243277	0.248047	0.248047	0.248047	0.248047	0.288085	0.378938	0.471429	0.499802	0.581022	0.699987	0.784393	0.916389	1.05379	1.39059	6.71749
0	0	0	0	0	0	0	0	0	0	0	0.0758469	0.179869	0.187134	0.2455	0.248047	0.248047	0.248047	0.248047	0.288928	0.380536	0.472499	0.500986	0.582807	0.700075	0.792738	0.918605	1.09274	1.40961	6.72435
0	0	0	0	0	0	0	0	0	0	0	0.0759632	0.180091	0.187202	0.247476	0.248047	0.248047	0.248047	0.248047	0.291059	0.385204	0.473749	0.502002	0.585726	0.700302	0.800947	0.92258	1.1093	1.41248	8.31975
0	0	0	0	0	0	0	0	0	0	0	0.0837636	0.180923	0.1877	0.248047	0.248047	0.248047	0.248047	0.248047	0.291273	0.385413	0.474156	0.503749	0.585953	0.701707	0.817105	0.926236	1.12067	1.42635	10.2272
0	0	0	0	0	0	0	0	0	0	0	0.0871109	0.181518	0.188472	0.248047	0.248047	0.248047	0.248047	0.248047	0.292314	0.386259	0.478068	0.509624	0.593988	0.702345	0.823076	0.926779	1.12441	1.44489	11.7659
0	0	0	0	0	0	0	0	0	0	0	0.0940494	0.184225	0.188558	0.248047	0.248047	0.248047	0.248047	0.248047	0.293773	0.386281	0.481197	0.511522	0.594595	0.70409	0.824802	0.926927	1.13505	1.46515	14.5166
0	0	0	0	0	0	0	0	0	0	0	0.0979587	0.185586	0.195599	0.248047	0.248047	0.248047	0.248047	0.248047	0.297949	0.389954	0.485046	0.513785	0.606758	0.712308	0.831323	0.928816	1.14006	1.46642	16.6856
0	0	0	0	0	0	0	0	0	0	0	0.101183	0.185831	0.195957	0.248047	0.248047	0.248047	0.248047	0.248047	0.298148	0.393696	0.487209	0.51402	0.615044	0.713558	0.840323	0.930656	1.14828	1.47565	17.8869
0	0	0	0	0	0	0	0	0	0	0	0.103777	0.185969	0.198354	0.248047	0.248047	0.248047	0.248047	0.248047	0.301196	0.394221	0.491564	0.52459	0.621406	0.714309	0.840489	0.949689	1.15474	1.49302	18.6035
0	0	0	0	0	0	0	0	0	0	0	0.104624	0.188449	0.198788	0.248047	0.248047	0.248047	0.248047	0.248047	0.301997	0.397491	0.492123	0.533226	0.628922	0.718169	0.851111	0.950899	1.15834	1.54755	24.8047
0	0	0	0	0	0	0	0	0	0	0	0.109849	0.189566	0.198912	0.248047	0.248047	0.248047	0.248047	0.248047	0.304944	0.399406	0.496094	0.55366	0.633051	0.719345	0.852841	0.986888	1.18141	1.56879	24.8357
0	0	0	0	0	0	0	0	0	0	0	0.110871	0.19067	0.202314	0.248047	0.248047	0.248047	0.248047	0.255865	0.307496	0.411283	0.496094	0.55465	0.645244	0.719818	0.854697	0.988251	1.18725	1.57432	27.2005
0	0	0	0	0	0	0	0	0	0	0	0.111148	0.191676	0.202326	0.248047	0.248047	0.248047	0.248047	0.256157	0.321392	0.411621	0.496094	0.55465	0.653353	0.72146	0.860929	0.991687	1.18902	1.58827	28.2817
0	0	0	0	0	0	0	0	0	0	0	0.123875	0.19898	0.205128	0.248047	0.248047	0.248047	0.248564	0.256993	0.341771	0.413393	0.496094	0.55465	0.653821	0.732081	0.871261	0.992188	1.19326	1.59247	34.4821
0	0	0	0	0	0	0	0	0	0	0	0.124103	0.199231	0.206363	0.248047	0.248047	0.248047	0.249271	0.257233	0.343009	0.41373	0.496094	0.574805	0.65426	0.734746	0.872832	0.992188	1.20027	1.65729	35.0791
0	0	0	0	0	0	0	0	0	0	0	0.126418	0.200425	0.209802	0.248047	0.248047	0.248047	0.251793	0.260532	0.343305	0.421857	0.496094	0.578547	0.655079	0.740429	0.876935	0.992188	1.20639	1.68409	38.9441
0	0	0	0	0	0	0	0	0	0	0	0.13249	0.201969	0.213479	0.248047	0.248047	0.248047	0.251957	0.266899	0.345648	0.422236	0.503566	0.578575	0.659931	0.742341	0.879136	0.992188	1.22007	1.69489	39.7649
0	0	0	0	0	0	0	0	0	0	0	0.133483	0.2024	0.21733	0.248047	0.248047	0.248047	0.253033	0.266927	0.345956	0.422498	0.504142	0.578779	0.662856	0.74376	0.883792	0.992188	1.22562	1.71312	45.9557
0	0	0	0	0	0	0	0	0	0	0	0.135741	0.2064	0.218596	0.248047	0.248047	0.248047	0.253975	0.267919	0.350791	0.431348	0.50506	0.579896	0.665798	0.744141	0.885545	0.992188	1.22766	1.74861	50.3633
0	0	0	0	0	0	0	0	0	0	0	0.136217	0.206692	0.218783	0.248047	0.248047	0.248047	0.254143	0.26864	0.353103	0.432004	0.511522	0.583161	0.667321	0.744141	0.889133	0.992188	1.23436	1.75396	54.0321
0	0	0	0	0	0	0	0	0	0	0	0.141074	0.206768	0.22111	0.248047	0.248047	0.248047	0.254838	0.271809	0.354711	0.434346	0.516973	0.585243	0.667951	0.744141	0.889282	0.993764	1.23824	1.75396	54.4009
0	0	0	0	0	0	0	0	0	0	0.0180581	0.145011	0.207243	0.221335	0.248047	0.248047	0.248047	0.259031	0.27421	0.355952	0.440162	0.52032	0.585661	0.67158	0.744271	0.894346	0.996819	1.23997	1.75396	55.5343
0	0	0	0	0	0	0	0	0	0	0.0300915	0.145157	0.208126	0.221554	0.248047	0.248047	0.248047	0.259488	0.274768	0.356671	0.442752	0.522205	0.593516	0.671755	0.744967	0.89837	0.997029	1.24023	1.75396	56.0443
0	0	0	0	0	0	0	0	0	0	0.0337111	0.145771	0.209304	0.22239	0.248047	0.248047	0.248047	0.262171	0.279641	0.356794	0.446753	0.523889	0.593988	0.674246	0.745943	0.899262	1.00171	1.24023	1.75396	57.172
0	0	0	0	0	0	0	0	0	0	0.0486162	0.150256	0.210644	0.223012	0.248047	0.248047	0.248047	0.268879	0.288223	0.365691	0.447495	0.524334	0.596674	0.68007	0.747199	0.899444	1.00293	1.24023	1.76209	58.7641
0	0	0	0	0	0	0	0	0	0	0.0605414	0.152211	0.211493	0.22379	0.248047	0.248047	0.251801	0.269407	0.289114	0.366398	0.453178	0.529064	0.596705	0.681419	0.747351	0.899918	1.00445	1.24023	1.76557	63.4462
0	0	0	0	0	0	0	0	0	0	0.0616461	0.155236	0.21195	0.2242	0.248047	0.248047	0.252411	0.270718	0.290465	0.367054	0.457888	0.533067	0.597556	0.682069	0.750465	0.900174	1.01221	1.24023	1.76869	66.7887
0	0	0	0	0	0	0	0	0	0	0.0675644	0.159157	0.213131	0.224851	0.248047	0.248047	0.253383	0.271809	0.301587	0.367841	0.458649	0.533226	0.6036	0.682356	0.755099	0.903043	1.01919	1.24023	1.83328	71.0839
0	0	0	0	0	0	0	0	0	0	0.0744366	0.164726	0.215209	0.228181	0.248047	0.248047	0.253562	0.273344	0.30283	0.373088	0.461228	0.541281	0.607072	0.687614	0.763031	0.905061	1.02286	1.24023	1.83718	77.7005
0	0	0	0	0	0	0	0	0	0	0.0807555	0.165402	0.216509	0.22927	0.248047	0.248047	0.256507	0.28567	0.307496	0.373918	0.461322	0.551619	0.618803	0.692253	0.765851	0.907627	1.02923	1.24023	1.87692	78.0954
0	0	0	0	0	0	0	0	0	0	0.0818093	0.165525	0.216596	0.229718	0.248047	0.248047	0.257633	0.286093	0.311598	0.374704	0.461763	0.55465	0.619232	0.693046	0.766886	0.916568	1.03177	1.24023	1.93731	82.6596
0	0	0	0	0	0	0	0	0	0	0.0823968	0.170897	0.216946	0.230242	0.248047	0.248239	0.260989	0.289467	0.315285	0.374704	0.466545	0.55465	0.624736	0.69332	0.767033	0.924012	1.03847	1.24091	1.93797
0	0	0	0	0	0	0	0	0	0	0.0834222	0.171908	0.21721	0.231476	0.248047	0.249022	0.263033	0.292558	0.319366	0.376769	0.470578	0.55465	0.628437	0.693462	0.767124	0.929445	1.04114	1.25042	1.99982
0	0	0	0	0	0	0	0	0	0	0.0867402	0.173554	0.217719	0.232113	0.248047	0.254518	0.263366	0.296888	0.319747	0.381941	0.471429	0.55465	0.628974	0.695583	0.76799	0.930404	1.04486	1.26394	2.00656
0	0	0	0	0	0	0	0	0	0	0.0902686	0.175904	0.218213	0.233093	0.248047	0.257049	0.265638	0.298404	0.321392	0.388219	0.475936	0.557321	0.631222	0.696212	0.768516	0.935157	1.06035	1.2648	2.02991
0	0	0	0	0	0	0	0	0	0	0.0905471	0.175992	0.218495	0.233759	0.248047	0.257134	0.267266	0.298663	0.325132	0.38847	0.47758	0.560693	0.634393	0.698292	0.768926	0.942086	1.06081	1.2648	2.04699
0	0	0	0	0	0	0	0	0	0	0.0916264	0.178906	0.219197	0.234599	0.248047	0.260116	0.270943	0.300124	0.326283	0.39186	0.491564	0.563782	0.635381	0.700302	0.77963	0.94457	1.06726	1.2648	2.06941
0	0	0	0	0	0	0	0	0	0	0.0929316	0.179232	0.219277	0.234637	0.248047	0.261264	0.271418	0.301824	0.328128	0.391898	0.492118	0.565352	0.638353	0.701343	0.78255	0.946033	1.07103	1.2648	2.08424
0	0	0	0	0	0	0	0	0	0	0.101887	0.180115	0.222713	0.236644	0.248047	0.263441	0.272012	0.304428	0.331111	0.394558	0.494755	0.565569	0.639113	0.703208	0.784393	0.946875	1.07318	1.2648	2.10396
0	0	0	0	0	0	0	0	0	0	0.104543	0.184027	0.226409	0.237779	0.248047	0.26425	0.272033	0.304856	0.341765	0.398012	0.496094	0.567502	0.640754	0.70409	0.784393	0.94892	1.0807	1.2648	2.10522
0	0	0	0	0	0	0	0	0	0	0.10578	0.186591	0.230944	0.238482	0.248047	0.268358	0.272104	0.310174	0.343929	0.398719	0.496094	0.574788	0.643565	0.710607	0.785581	0.957236	1.08691	1.2648	2.11755
0	0	0	0	0	0	0	0	0	0	0.116214	0.187067	0.231634	0.239256	0.248047	0.269382	0.279541	0.310254	0.346812	0.39907	0.496094	0.575904	0.644455	0.713297	0.808164	0.957816	1.08754	1.2648	2.11807
0	0	0	0	0	0	0	0	0	0	0.118176	0.188986	0.231819	0.239361	0.248047	0.270943	0.280901	0.310297	0.349141	0.404508	0.496094	0.576729	0.645506	0.715204	0.811524	0.965438	1.08917	1.26623	2.11931
0	0	0	0	0	0	0	0	0	0	0.119575	0.189365	0.232995	0.242996	0.248047	0.271076	0.281365	0.31608	0.350791	0.408101	0.496094	0.577165	0.650112	0.715324	0.81245	0.967261	1.09259	1.27579	2.11931
0	0	0	0	0	0	0	0	0	0	0.120162	0.191395	0.234531	0.248047	0.248047	0.27219	0.282124	0.316622	0.350918	0.411437	0.496094	0.581894	0.653353	0.715511	0.818479	0.968196	1.09717	1.27601	2.11931
0	0	0	0	0	0	0	0	0	0	0.122932	0.191764	0.238808	0.248047	0.248047	0.274638	0.284927	0.316872	0.350932	0.413393	0.496094	0.588666	0.656385	0.725424	0.826065	0.968407	1.10094	1.27879	2.11998
0	0	0	0	0	0	0	0	0	0	0.126422	0.192266	0.239005	0.248047	0.248047	0.276239	0.285069	0.322758	0.351933	0.415554	0.496094	0.591269	0.658543	0.726196	0.82928	0.970661	1.10404	1.29168	2.13378
0	0	0	0	0	0	0	0	0	0	0.12733	0.192292	0.239124	0.248047	0.248047	0.276531	0.285631	0.325306	0.356671	0.416753	0.497056	0.597085	0.65918	0.726225	0.830469	0.971782	1.1093	1.29465	2.13378
0	0	0	0	0	0	0	0	0	0	0.129705	0.194957	0.240048	0.248047	0.248047	0.277544	0.286568	0.325318	0.35747	0.418485	0.509674	0.603795	0.661419	0.727435	0.830782	0.973033	1.1093	1.29632	2.13378
0	0	0	0	0	0	0	0	0	0	0.133221	0.196112	0.241487	0.248047	0.248047	0.280287	0.287437	0.325682	0.35984	0.419612	0.515537	0.604963	0.668079	0.728634	0.833807	0.974087	1.1093	1.29947	2.14035
0	0	0	0	0	0	0	0	0	0	0.134888	0.196726	0.241671	0.248047	0.248047	0.281365	0.289656	0.326283	0.360136	0.424121	0.51725	0.606326	0.670896	0.730768	0.83848	0.97441	1.11368	1.30326	2.14477
0	0	0	0	0	0	0	0	0	0	0.134899	0.19834	0.24501	0.248047	0.248047	0.281495	0.291787	0.329101	0.364935	0.428827	0.517446	0.611597	0.675615	0.732797	0.846764	0.97566	1.11774	1.30601	2.18697
0	0	0	0	0	0	0	0	0	0	0.137707	0.202722	0.245597	0.248047	0.248047	0.28169	0.292386	0.331118	0.36529	0.432247	0.522675	0.618938	0.677614	0.733383	0.848795	0.97722	1.12201	1.31312	2.20554
0	0	0	0	0	0	0	0	0	0	0.138307	0.203079	0.246039	0.248047	0.248047	0.28204	0.297325	0.331692	0.367154	0.434641	0.523362	0.619734	0.680002	0.737936	0.85457	0.985347	1.12922	1.32556	2.20958
0	0	0	0	0	0	0	0	0	0	0.138484	0.206282	0.247667	0.248047	0.248047	0.28437	0.300724	0.333763	0.367939	0.439728	0.524591	0.621834	0.681636	0.738695	0.855583	0.989436	1.13643	1.34346	2.28688
0	0	0	0	0	0	0	0	0	0	0.141423	0.206428	0.248047	0.248047	0.248047	0.284992	0.301724	0.333851	0.372531	0.440563	0.529957	0.624377	0.682069	0.739062	0.855846	0.992188	1.14093	1.34382	2.28688
0	0	0	0	0	0	0	0	0	0	0.141817	0.207384	0.248047	0.248047	0.248047	0.285161	0.302342	0.334146	0.372552	0.440651	0.530573	0.627883	0.682298	0.739346	0.857526	0.992188	1.14554	1.35358	2.29398
0	0	0	0	0	0	0	0	0	0	0.142112	0.208074	0.248047	0.248047	0.248047	0.28532	0.303015	0.335301	0.379621	0.442036	0.536267	0.631522	0.684223	0.742529	0.857545	0.992188	1.15159	1.36141	2.31139
0	0	0	0	0	0	0	0	0	0	0.144461	0.208635	0.248047	0.248047	0.248047	0.285676	0.306906	0.337491	0.384173	0.448692	0.537406	0.63458	0.686199	0.743995	0.858908	0.992188	1.16179	1.36323	2.31216
0	0	0	0	0	0	0	0	0	0	0.145178	0.209614	0.248047	0.248047	0.251382	0.286517	0.310689	0.343929	0.389412	0.449261	0.537614	0.638419	0.688715	0.744141	0.858939	0.992188	1.16246	1.36831	2.31933
0	0	0	0	0	0	0	0	0	0	0.14554	0.20966	0.248047	0.248047	0.251744	0.287897	0.313446	0.344769	0.390066	0.452339	0.53762	0.639644	0.69332	0.744141	0.859565	0.992188	1.16396	1.37404	2.32571
0	0	0	0	0	0	0	0	0	0	0.14657	0.211605	0.248047	0.248047	0.251901	0.290234	0.317631	0.345211	0.3906	0.454544	0.543119	0.640125	0.693493	0.744141	0.860558	0.992188	1.17029	1.37786	2.33119
0	0	0	0	0	0	0	0	0	0.00792392	0.148448	0.212233	0.248047	0.248047	0.254	0.292578	0.319265	0.346812	0.390803	0.458672	0.544884	0.641101	0.693696	0.744141	0.861326	0.992188	1.18407	1.3919	2.34007
0	0	0	0	0	0	0	0	0	0.0231087	0.149613	0.214622	0.248047	0.248047	0.254309	0.292877	0.319948	0.347483	0.392066	0.461763	0.547211	0.643118	0.694581	0.744141	0.867624	0.992188	1.18437	1.39481	2.34007
0	0	0	0	0	0	0	0	0	0.0303158	0.151312	0.215648	0.248047	0.248047	0.255782	0.293096	0.326283	0.350791	0.394875	0.461914	0.55465	0.644494	0.694673	0.744141	0.867639	1.00346	1.19316	1.40136	2.34007
0	0	0	0	0	0	0	0	0	0.0345144	0.153479	0.216298	0.248047	0.248047	0.255784	0.294817	0.327738	0.350791	0.396147	0.470689	0.55465	0.645244	0.696212	0.744141	0.868295	1.00635	1.19322	1.40676	2.35166
0	0	0	0	0	0	0	0	0	0.0390146	0.153816	0.21747	0.248047	0.248047	0.257049	0.29678	0.328423	0.350791	0.39638	0.471429	0.55465	0.646388	0.697054	0.744141	0.870126	1.00898	1.19693	1.43301	2.35318
0	0	0	0	0	0	0	0	0	0.0444442	0.154131	0.217709	0.248047	0.248047	0.257137	0.296914	0.330602	0.350791	0.400002	0.478333	0.555524	0.648543	0.697918	0.744141	0.870681	1.01279	1.20151	1.44274	2.38727
0	0	0	0	0	0	0	0	0	0.0465314	0.154506	0.218629	0.248047	0.248047	0.257168	0.301374	0.331095	0.354074	0.402452	0.480381	0.557487	0.650112	0.700028	0.745379	0.87148	1.01741	1.20254	1.4483	2.45554
0	0	0	0	0	0	0	0	0	0.0501119	0.155066	0.221809	0.248047	0.248047	0.257548	0.302391	0.334146	0.356398	0.403479	0.481069	0.558475	0.655189	0.700167	0.749687	0.892883	1.02029	1.20368	1.44979	2.45554
0	0	0	0	0	0	0	0	0	0.0526042	0.158046	0.222807	0.248047	0.248047	0.258074	0.303617	0.334684	0.360278	0.411334	0.48195	0.569629	0.657021	0.701343	0.751563	0.893403	1.02161	1.20733	1.45192	2.48047
0	0	0	0	0	0	0	0	0	0.0550801	0.158662	0.223897	0.248047	0.248047	0.260409	0.305689	0.33612	0.360552	0.413941	0.486122	0.57216	0.657393	0.702303	0.752804	0.895816	1.0222	1.20802	1.46831	2.48047
0	0	0	0	0	0	0	0	0	0.0554386	0.159008	0.225355	0.248047	0.248047	0.2622	0.308667	0.336211	0.360704	0.414902	0.490187	0.575904	0.658026	0.70682	0.75891	0.8959	1.02272	1.21244	1.47836	2.48047
0	0	0	0	0	0	0	0	0	0.0558984	0.159724	0.227095	0.248047	0.248047	0.265607	0.310295	0.336296	0.361546	0.414961	0.491564	0.577109	0.658773	0.707853	0.759972	0.898602	1.02272	1.2172	1.48204	2.48047
0	0	0	0	0	0	0	0	0	0.0622332	0.161627	0.227423	0.248047	0.248047	0.266049	0.314417	0.337397	0.362106	0.417037	0.492674	0.578873	0.66122	0.710194	0.761554	0.90834	1.02389	1.21811	1.48835	2.48047
0	0	0	0	0	0	0	0	0	0.0726682	0.162673	0.229083	0.248047	0.248047	0.26616	0.314426	0.338337	0.365356	0.418146	0.493357	0.582369	0.662344	0.71023	0.762663	0.912157	1.02716	1.23429	1.5021	2.49329
0	0	0	0	0	0	0	0	0	0.0740986	0.163771	0.229365	0.248047	0.248047	0.266578	0.316108	0.340015	0.365691	0.418254	0.496094	0.589085	0.662934	0.712409	0.763514	0.914752	1.02872	1.23964	1.50327	2.52695
0	0	0	0	0	0	0	0	0	0.0743119	0.164898	0.235426	0.248047	0.248047	0.267489	0.319245	0.340224	0.367589	0.422498	0.496094	0.5905	0.666102	0.716815	0.772011	0.917148	1.03697	1.24023	1.50427	2.5538
0	0	0	0	0	0	0	0	0	0.0772343	0.167724	0.240533	0.248047	0.248047	0.269418	0.319705	0.343606	0.37043	0.423836	0.496094	0.591829	0.669167	0.721385	0.77423	0.919892	1.03815	1.24023	1.52836	2.5538
0	0	0	0	0	0	0	0	0	0.0840518	0.16855	0.240789	0.248047	0.248047	0.271962	0.320381	0.343863	0.374328	0.42508	0.496094	0.594968	0.672137	0.723493	0.778843	0.928394	1.04576	1.24023	1.56309	2.57424
0	0	0	0	0	0	0	0	0	0.0846113	0.170281	0.241286	0.248047	0.248047	0.272357	0.321424	0.344059	0.374624	0.429752	0.496094	0.5955	0.678214	0.723554	0.779371	0.929657	1.05434	1.24023	1.58181	2.58969
0	0	0	0	0	0	0	0	0	0.0849289	0.172663	0.241575	0.248047	0.248047	0.273023	0.321437	0.34413	0.375216	0.431548	0.496094	0.596264	0.679957	0.725784	0.780216	0.931735	1.06321	1.24023	1.58827	2.67155
0	0	0	0	0	0	0	0	0	0.0866835	0.173278	0.2419	0.248047	0.248047	0.275127	0.321805	0.344194	0.375289	0.433169	0.496094	0.59794	0.680072	0.725829	0.783967	0.937147	1.06425	1.24023	1.58827	2.69451
0	0	0	0	0	0	0	0	0	0.0886039	0.17794	0.242599	0.248047	0.248047	0.278552	0.321977	0.345504	0.375487	0.435668	0.496094	0.601676	0.680393	0.729108	0.784297	0.941274	1.06672	1.24023	1.60352	2.77325
0	0	0	0	0	0	0	0	0	0.0899012	0.179112	0.24608	0.248047	0.248047	0.279336	0.322456	0.346734	0.376788	0.437546	0.496094	0.606823	0.681076	0.730356	0.784393	0.946562	1.06725	1.24023	1.60811	2.77325
0	0	0	0	0	0	0	0	0	0.0921658	0.179844	0.246495	0.248047	0.248047	0.280739	0.324752	0.350791	0.376967	0.437602	0.496094	0.606857	0.681113	0.730495	0.784393	0.958449	1.06741	1.24023	1.66395	2.77325
0	0	0	0	0	0	0	0	0.0201896	0.0925918	0.18291	0.246973	0.248047	0.248047	0.281081	0.326712	0.350791	0.377162	0.437931	0.497084	0.607596	0.681271	0.730789	0.790858	0.962292	1.06788	1.24023	1.71145	2.77325
0	0	0	0	0	0	0	0	0.0223827	0.0986107	0.183631	0.247427	0.248047	0.248047	0.282319	0.327581	0.350791	0.379557	0.438779	0.499323	0.608572	0.682069	0.733383	0.794601	0.963274	1.07804	1.24023	1.71147	2.77325
0	0	0	0	0	0	0	0	0.0229091	0.103441	0.184317	0.247592	0.248047	0.248047	0.284513	0.330119	0.351959	0.379612	0.441156	0.500084	0.615941	0.682298	0.737189	0.800662	0.964019	1.08324	1.24023	1.71259	2.77325
0	0	0	0	0	0	0	0	0.0257805	0.104977	0.185499	0.247823	0.248047	0.248047	0.285797	0.332177	0.353782	0.383482	0.441613	0.503324	0.617448	0.682512	0.738536	0.803913	0.964415	1.08528	1.24023	1.71736	2.83766
0	0	0	0	0	0	0	0	0.0316806	0.107947	0.186073	0.248042	0.248047	0.248047	0.288526	0.332348	0.355333	0.385208	0.445309	0.503622	0.620747	0.682708	0.739022	0.804451	0.970472	1.08693	1.24023	1.71748	2.89073
0	0	0	0	0	0	0	0	0.0365067	0.10808	0.186549	0.248047	0.248047	0.248047	0.28907	0.332432	0.357374	0.385456	0.449538	0.505324	0.621721	0.682791	0.740265	0.806849	0.972658	1.09443	1.24023	1.75358	2.92837
0	0	0	0	0	0	0	0	0.0402486	0.109445	0.186679	0.248047	0.248047	0.248047	0.289631	0.333084	0.358207	0.387129	0.451425	0.508679	0.623343	0.683924	0.741778	0.811441	0.973595	1.09958	1.24023	1.75396	2.9431
0	0	0	0	0	0	0	0	0.0451018	0.110625	0.188022	0.248047	0.248047	0.248047	0.290234	0.333483	0.358686	0.388309	0.451863	0.509154	0.624091	0.686199	0.744141	0.818014	0.978164	1.10088	1.24023	1.75396	2.98553
0	0	0	0	0	0	0	0	0.0482681	0.111951	0.188193	0.248047	0.248047	0.248047	0.291324	0.333712	0.360091	0.394189	0.452311	0.514132	0.62417	0.688085	0.744141	0.821923	0.979001	1.10111	1.24124	1.75396	2.98688
0	0	0	0	0	0	0	0	0.0484221	0.114863	0.189774	0.248047	0.248047	0.248047	0.292875	0.337779	0.360414	0.395832	0.456133	0.517894	0.631959	0.692526	0.744141	0.822789	0.979163	1.10813	1.24236	1.75719	2.98688
0	0	0	0	0	0	0	0	0.0508747	0.117868	0.190692	0.248047	0.248047	0.248047	0.294479	0.340358	0.362217	0.396755	0.456422	0.518719	0.632359	0.692897	0.744141	0.824496	0.980509	1.1093	1.24639	1.76112	2.99716
0	0	0	0	0	0	0	0	0.0588029	0.121175	0.191917	0.248047	0.248047	0.248047	0.29477	0.341169	0.365474	0.400701	0.459947	0.519248	0.633929	0.698326	0.744141	0.825837	0.984183	1.10939	1.25846	1.76685	3.0003
0	0	0	0	0	0	0	0	0.0595779	0.121814	0.193301	0.248047	0.248047	0.248047	0.298542	0.341917	0.367878	0.400848	0.461719	0.523808	0.634772	0.701343	0.744141	0.83538	0.988852	1.1133	1.2648	1.78869	3.01535
0	0	0	0	0	0	0	0	0.0654827	0.122432	0.193428	0.248047	0.248047	0.248047	0.299368	0.341929	0.369419	0.402302	0.464046	0.524454	0.63607	0.701548	0.744141	0.83545	0.992188	1.11625	1.2648	1.79504	3.04852
0	0	0	0	0	0	0	0	0.066953	0.122983	0.195927	0.248047	0.248047	0.248047	0.29939	0.342136	0.371467	0.403716	0.467885	0.528804	0.637936	0.701583	0.744141	0.835816	0.992188	1.1197	1.2648	1.83258	3.06817
0	0	0	0	0	0	0	0	0.0679241	0.125358	0.196822	0.248047	0.248047	0.248047	0.299955	0.342914	0.373567	0.405763	0.468978	0.53203	0.638524	0.701837	0.754733	0.838108	0.992188	1.12566	1.2648	1.83733	3.06865
0	0	0	0	0	0	0	0	0.0682333	0.128154	0.197865	0.248047	0.248047	0.248047	0.300063	0.343404	0.373863	0.407643	0.470328	0.532871	0.639607	0.701942	0.756083	0.844601	0.992188	1.1257	1.2648	1.85296	3.12944
0	0	0	0	0	0	0	0	0.0682857	0.130131	0.199479	0.248047	0.248047	0.248047	0.303424	0.345025	0.376231	0.410421	0.475984	0.534968	0.64132	0.703402	0.757297	0.846731	0.992188	1.12615	1.26607	1.85774	3.13757
0	0	0	0	0	0	0	0	0.0719954	0.13048	0.199761	0.248047	0.248047	0.249695	0.30416	0.345142	0.376967	0.411795	0.48333	0.537538	0.64301	0.703834	0.758817	0.847163	0.992188	1.12627	1.28275	1.87326	3.19356
0	0	0	0	0	0	0	0	0.0755076	0.131712	0.200753	0.248047	0.248047	0.252484	0.305014	0.346478	0.3798	0.416835	0.485195	0.539509	0.643236	0.704233	0.759878	0.850316	0.992188	1.13945	1.28514	1.88916	3.24253
0	0	0	0	0	0	0	0	0.0777065	0.131798	0.200811	0.248047	0.248047	0.252932	0.306155	0.346553	0.38009	0.419541	0.487103	0.5401	0.645854	0.707815	0.76015	0.853945	0.992188	1.14117	1.29034	1.91075	3.30936
0	0	0	0	0	0	0	0	0.078088	0.132025	0.202453	0.248047	0.248047	0.254539	0.307856	0.347206	0.380951	0.419569	0.488107	0.546499	0.646723	0.716109	0.763911	0.85557	0.992188	1.14143	1.29166	1.92265	3.31122
0	0	0	0	0	0	0	0	0.0781963	0.133417	0.204021	0.248047	0.248047	0.255784	0.311313	0.348268	0.381322	0.42058	0.48897	0.55136	0.64736	0.718587	0.765719	0.865679	0.992188	1.14398	1.29548	1.92319	3.33713
0	0	0	0	0	0	0	0	0.0793689	0.133937	0.204488	0.248047	0.248047	0.258201	0.312002	0.348843	0.383163	0.42121	0.489824	0.552786	0.649661	0.720535	0.768388	0.869257	0.994981	1.14642	1.30115	1.92734	3.38149
0	0	0	0	0	0	0	0	0.0801289	0.134444	0.20532	0.248047	0.248047	0.261057	0.312574	0.350276	0.384524	0.423763	0.491629	0.55465	0.649731	0.72072	0.769602	0.870469	0.995543	1.14851	1.30771	1.9278	3.47266
0	0	0	0	0	0	0	0	0.0801656	0.136023	0.206102	0.248047	0.248047	0.262221	0.312809	0.350791	0.388571	0.42474	0.493684	0.55465	0.650112	0.722456	0.774232	0.872109	1.00005	1.14852	1.32015	1.93731	3.50791
0	0	0	0	0	0	0	0	0.0831876	0.137122	0.208562	0.248047	0.248047	0.263608	0.313919	0.350791	0.390803	0.425475	0.49431	0.55465	0.652262	0.722967	0.774803	0.880045	1.00312	1.14892	1.33011	1.93731	3.50791
0	0	0	0	0	0	0	0	0.0855197	0.138011	0.208839	0.248047	0.248047	0.264316	0.314095	0.350791	0.393447	0.426021	0.496094	0.55465	0.655671	0.726267	0.775055	0.88146	1.00652	1.15087	1.33577	1.93731	3.56426
0	0	0	0	0	0	0	0.00290596	0.0855825	0.138915	0.208986	0.248047	0.248047	0.266045	0.314187	0.350791	0.396886	0.426126	0.496094	0.55465	0.656852	0.732165	0.775843	0.883514	1.00885	1.15642	1.34418	1.95388	3.60309
0	0	0	0	0	0	0	0.00557002	0.0863817	0.139536	0.209687	0.248047	0.248047	0.26616	0.314287	0.350791	0.397213	0.428144	0.496094	0.555042	0.657316	0.732509	0.77729	0.883722	1.01343	1.16182	1.37127	1.96088	3.60674
0	0	0	0	0	0	0	0.0201896	0.0893728	0.141019	0.209711	0.248047	0.248047	0.266175	0.315999	0.350791	0.399951	0.429752	0.496094	0.556778	0.65733	0.732948	0.781309	0.884183	1.01712	1.16667	1.37442	1.96668	3.61162
0	0	0	0	0	0	0	0.0202466	0.0905022	0.142258	0.210312	0.248047	0.248047	0.266267	0.317188	0.350791	0.399998	0.430862	0.496094	0.556796	0.659566	0.736379	0.783507	0.886312	1.0196	1.18133	1.37632	1.9735	3.62833
0	0	0	0	0	0	0	0.030222	0.0978061	0.143156	0.211025	0.248047	0.248047	0.267136	0.318936	0.350791	0.400711	0.43157	0.496094	0.557943	0.663152	0.736942	0.784393	0.886668	1.02272	1.18334	1.38053	1.97773	3.6451
0	0	0	0	0	0	0	0.0411556	0.0985618	0.147618	0.211088	0.248047	0.248047	0.267198	0.32107	0.350791	0.401398	0.43356	0.496094	0.563937	0.664401	0.736979	0.784393	0.887644	1.02272	1.18407	1.38348	1.97786	3.66791
0	0	0	0	0	0	0	0.0416412	0.0996949	0.148749	0.211553	0.248047	0.248047	0.268363	0.322125	0.351926	0.403036	0.434359	0.496094	0.564864	0.665723	0.739589	0.784393	0.890092	1.02272	1.18557	1.39143	1.98438	3.69012
0	0	0	0	0	0	0	0.0439234	0.0997168	0.152222	0.215649	0.248047	0.248047	0.271575	0.322271	0.353639	0.40307	0.435148	0.496094	0.569138	0.666184	0.743785	0.78929	0.893738	1.02272	1.19538	1.39304	1.98438	3.71799
0	0	0	0	0	0	0	0.0445389	0.102954	0.152249	0.216263	0.248047	0.248047	0.27163	0.323935	0.359208	0.405531	0.435597	0.496094	0.572538	0.667158	0.743794	0.790184	0.895879	1.02377	1.1971	1.40546	1.99982	3.7207
0	0	0	0	0	0	0	0.0504179	0.105662	0.152738	0.216637	0.248047	0.248047	0.272055	0.324776	0.361075	0.405823	0.436221	0.496094	0.572578	0.667444	0.744141	0.792386	0.899936	1.03012	1.22134	1.41059	1.99982	3.74673
0	0	0	0	0	0	0	0.0512302	0.109433	0.155471	0.219069	0.248047	0.248047	0.272642	0.325584	0.361223	0.405948	0.436405	0.496094	0.573172	0.668322	0.744141	0.793106	0.902969	1.03088	1.22589	1.41343	2.01471	3.75363
0	0	0	0	0	0	0	0.0526784	0.11244	0.157861	0.219178	0.248047	0.248047	0.272965	0.326712	0.362986	0.408093	0.438476	0.496094	0.576233	0.669044	0.744141	0.795905	0.915879	1.03154	1.23115	1.42132	2.03784	3.75377
0	0	0	0	0	0	0	0.0541021	0.116097	0.157944	0.220736	0.248047	0.248047	0.274528	0.328267	0.363094	0.409348	0.443037	0.496094	0.577949	0.669073	0.744141	0.797462	0.917447	1.03413	1.23376	1.42892	2.04067	3.75751
0	0	0	0	0	0	0	0.0541358	0.116147	0.160361	0.220791	0.248047	0.248431	0.274732	0.328448	0.363274	0.40992	0.443508	0.498072	0.581336	0.669934	0.744141	0.798207	0.920465	1.03815	1.23876	1.43341	2.08824	3.79439
0	0	0	0	0	0	0	0.0564933	0.11713	0.160729	0.221534	0.248047	0.248878	0.277106	0.329109	0.363417	0.409989	0.445863	0.499418	0.582365	0.670722	0.744141	0.79824	0.928394	1.03968	1.24023	1.43574	2.09217	3.79439
0	0	0	0	0	0	0	0.0588029	0.117283	0.165812	0.221603	0.248047	0.25055	0.280164	0.330181	0.364327	0.411209	0.447452	0.499706	0.583889	0.672775	0.744141	0.799024	0.928525	1.04318	1.24023	1.43672	2.10475	3.79439
0	0	0	0	0	0	0	0.0588629	0.118837	0.169997	0.222012	0.248047	0.250726	0.280417	0.330215	0.364428	0.412638	0.44751	0.499986	0.583928	0.678655	0.744141	0.800013	0.930275	1.04347	1.24023	1.43892	2.10475	3.79439
0	0	0	0	0	0	0	0.0591196	0.120304	0.171928	0.222109	0.248047	0.25166	0.28161	0.33047	0.364559	0.414478	0.449401	0.500001	0.584665	0.680057	0.750386	0.801421	0.933134	1.04491	1.24023	1.44528	2.10475	3.80322
0	0	0	0	0	0	0	0.0605342	0.121804	0.172074	0.224069	0.248047	0.25218	0.283178	0.331334	0.36463	0.415149	0.450368	0.503601	0.585528	0.681235	0.751688	0.804181	0.934829	1.04687	1.24023	1.44635	2.10655	3.85072
0	0	0	0	0	0	0	0.0609741	0.122658	0.17217	0.224145	0.248047	0.252185	0.284039	0.332006	0.365959	0.41723	0.451683	0.504182	0.587588	0.684112	0.753417	0.809381	0.938858	1.04844	1.24023	1.44635	2.11775	3.85782
0	0	0	0	0	0	0	0.0657522	0.123843	0.172826	0.224258	0.248047	0.252683	0.284125	0.333261	0.366277	0.42092	0.454811	0.505312	0.589317	0.68483	0.754145	0.813213	0.939199	1.04853	1.24023	1.44691	2.11821	3.9095
0	0	0	0	0	0	0	0.0691179	0.124932	0.174333	0.226252	0.248047	0.253433	0.284626	0.333497	0.367507	0.422424	0.456329	0.507818	0.594616	0.686199	0.755633	0.814037	0.941397	1.05237	1.24023	1.44778	2.11931	3.92197
0	0	0	0	0	0	0	0.0693398	0.124974	0.175478	0.22642	0.248047	0.253603	0.284912	0.33353	0.367884	0.423082	0.457692	0.50905	0.599672	0.692841	0.759099	0.819149	0.946051	1.05506	1.24023	1.45053	2.11931	3.99964
0	0	0	0	0	0	0	0.0712981	0.12572	0.177256	0.226513	0.248047	0.256587	0.285634	0.334796	0.368088	0.423707	0.459093	0.509798	0.600407	0.69523	0.760497	0.821361	0.949239	1.0588	1.24023	1.48828	2.11931	3.99964
0	0	0	0	0	0	0	0.073496	0.126123	0.177425	0.227624	0.248047	0.257653	0.285751	0.33612	0.368963	0.424548	0.462239	0.510505	0.604688	0.69624	0.760839	0.826357	0.950479	1.05892	1.24023	1.49155	2.13378	3.99967
0	0	0	0	0	0	0	0.074381	0.127112	0.178224	0.228245	0.248047	0.258754	0.285756	0.336313	0.369206	0.426221	0.463151	0.51065	0.607952	0.699689	0.764053	0.826639	0.954778	1.06468	1.24023	1.49802	2.13378	4.06765
0	0	0	0	0	0	0	0.0753877	0.12768	0.178896	0.228459	0.248047	0.260971	0.286088	0.337062	0.371159	0.427529	0.464052	0.511584	0.608704	0.699933	0.764602	0.828281	0.958942	1.06741	1.24023	1.49959	2.13378	4.24979
0	0	0	0	0	0	0	0.0761164	0.128858	0.179232	0.229067	0.248047	0.262435	0.287304	0.337587	0.372062	0.42935	0.464495	0.513245	0.61099	0.701395	0.76503	0.829071	0.959977	1.07221	1.24023	1.50276	2.13378	4.47173
0	0	0	0	0	0	0	0.0773067	0.13048	0.179314	0.229131	0.248047	0.262565	0.288196	0.338111	0.372571	0.429752	0.464522	0.51484	0.61112	0.703233	0.766165	0.833841	0.962656	1.07393	1.24023	1.50922	2.13378	4.54177
0	0	0	0	0	0	0.00496094	0.0775539	0.130669	0.180037	0.230085	0.248047	0.263681	0.288509	0.338833	0.374623	0.430603	0.465338	0.517096	0.611499	0.703949	0.766349	0.834272	0.962912	1.07601	1.24023	1.52019	2.14138	4.57773
0	0	0	0	0	0	0.00918527	0.0781037	0.132822	0.180085	0.23098	0.248047	0.264567	0.290938	0.339594	0.375216	0.431215	0.465426	0.519248	0.614876	0.704009	0.76696	0.835558	0.963197	1.07984	1.24023	1.52303	2.14512	4.59208
0	0	0	0	0	0	0.00924203	0.0785344	0.133306	0.180874	0.231594	0.248047	0.264915	0.292049	0.340508	0.378697	0.432162	0.466306	0.522156	0.618278	0.704926	0.768586	0.836837	0.964176	1.0813	1.24023	1.53394	2.19269	4.59843
0	0	0	0	0	0	0.0114209	0.0787666	0.134342	0.181019	0.23401	0.248047	0.265825	0.293505	0.340529	0.379002	0.432267	0.466973	0.523551	0.619359	0.705251	0.772719	0.838793	0.96437	1.08321	1.24023	1.54828	2.19387	4.61687
0	0	0	0	0	0	0.0184241	0.0787951	0.134558	0.181898	0.236003	0.248047	0.266141	0.293819	0.340732	0.379817	0.432956	0.468294	0.524	0.621317	0.709246	0.775255	0.839271	0.965602	1.08363	1.24023	1.5512	2.20195	4.62432
0	0	0	0	0	0	0.0188552	0.07909	0.13546	0.183174	0.236668	0.248047	0.266206	0.295128	0.341609	0.380081	0.435191	0.468423	0.524325	0.621924	0.711567	0.777454	0.842656	0.965803	1.088	1.24023	1.55859	2.20974	4.76236
0	0	0	0	0	0	0.0192024	0.0809831	0.135549	0.184821	0.237498	0.248047	0.270834	0.295207	0.343172	0.38022	0.437875	0.468733	0.530488	0.622368	0.713158	0.777779	0.84819	0.968959	1.0891	1.24023	1.5589	2.21801	4.78705
0	0	0	0	0	0	0.0237018	0.0848262	0.136063	0.185092	0.2376	0.248047	0.271839	0.29675	0.343404	0.380753	0.439122	0.469916	0.531423	0.624762	0.715812	0.78075	0.85351	0.975704	1.09056	1.24174	1.58827	2.24616	4.83113
0	0	0	0	0	0	0.0259917	0.0849564	0.137174	0.18571	0.237773	0.248047	0.272234	0.299166	0.345985	0.383908	0.440667	0.470925	0.53396	0.625214	0.718085	0.780783	0.855075	0.977673	1.09317	1.24541	1.58827	2.25351	4.89225
0	0	0	0	0	0	0.0294855	0.086224	0.138279	0.185854	0.237987	0.248047	0.272407	0.299368	0.346224	0.38822	0.441549	0.471117	0.534616	0.62528	0.719489	0.784393	0.855259	0.979001	1.09929	1.24632	1.58827	2.2595	4.99782
0	0	0	0	0	0	0.0302358	0.0869004	0.14005	0.186347	0.238568	0.248047	0.273722	0.300049	0.346389	0.392039	0.442521	0.472054	0.536094	0.627759	0.719755	0.784393	0.855805	0.979606	1.10384	1.24639	1.60281	2.28688	5.1076
0	0	0	0	0	0	0.0340857	0.0869641	0.140734	0.187344	0.238934	0.248047	0.274296	0.300079	0.347211	0.392199	0.442949	0.475782	0.538317	0.62779	0.7216	0.785729	0.858772	0.983163	1.10719	1.2526	1.61355	2.30277	5.1076
0	0	0	0	0	0	0.0390304	0.0881227	0.14316	0.187637	0.240862	0.248047	0.274331	0.300202	0.349152	0.393896	0.443142	0.480529	0.54006	0.6292	0.721707	0.785872	0.859891	0.987373	1.10884	1.26006	1.62428	2.31236	5.15639
0	0	0	0	0	0	0.0392826	0.0886874	0.143208	0.18799	0.241878	0.248047	0.274713	0.300934	0.349816	0.397872	0.444633	0.48072	0.542518	0.629682	0.723998	0.785967	0.860475	0.987548	1.10893	1.2648	1.63336	2.32138	5.16787
0	0	0	0	0	0	0.0408356	0.0915919	0.14367	0.188462	0.242077	0.248047	0.275314	0.302184	0.350115	0.399724	0.445527	0.481355	0.543086	0.631455	0.724016	0.787017	0.861326	0.990407	1.11225	1.2648	1.63609	2.34007	5.2762
0	0	0	0	0	0	0.0415345	0.0916933	0.144074	0.189141	0.242788	0.248047	0.275947	0.304102	0.350253	0.401129	0.445647	0.486004	0.545959	0.635025	0.725475	0.788788	0.861738	0.992188	1.1155	1.2648	1.6387	2.34007	5.3096
0	0	0	0	0	0	0.0432002	0.0917012	0.14409	0.189449	0.243043	0.248047	0.278323	0.304116	0.350428	0.401573	0.448329	0.487571	0.550288	0.636526	0.728667	0.791997	0.862113	0.992188	1.11896	1.2648	1.64291	2.34007	5.31336
0	0	0	0	0	0	0.0439544	0.0950156	0.144641	0.191296	0.243499	0.248047	0.278426	0.306748	0.350661	0.402801	0.44954	0.489489	0.554352	0.638061	0.729464	0.795204	0.865059	0.992188	1.12038	1.2648	1.64304	2.34007	5.35059
0	0	0	0	0	0	0.0441504	0.0961518	0.145502	0.191971	0.244178	0.248047	0.278823	0.307072	0.350791	0.405166	0.450872	0.490168	0.55465	0.638211	0.731025	0.795294	0.868384	0.992188	1.13026	1.2648	1.6612	2.34007	5.37232
0	0	0	0	0	0	0.0468718	0.0962564	0.146804	0.192156	0.244966	0.248047	0.279411	0.307122	0.350791	0.406236	0.451465	0.494048	0.55465	0.63922	0.732956	0.795765	0.869553	0.992188	1.13091	1.2747	1.66395	2.34007	5.40059
0	0	0	0	0	0	0.0469255	0.096446	0.147101	0.192381	0.246474	0.248047	0.280417	0.307474	0.350791	0.408837	0.454062	0.495936	0.55465	0.640807	0.734665	0.797794	0.872155	0.992188	1.13608	1.2773	1.69447	2.34007	5.54299
0	0	0	0	0	0	0.0479592	0.0974127	0.148086	0.19311	0.246744	0.249838	0.281801	0.307815	0.350791	0.408873	0.455595	0.496094	0.55465	0.643787	0.73673	0.798441	0.878692	0.992188	1.14849	1.27953	1.70073	2.34007	5.55077
0	0	0	0	0	0	0.0489492	0.0982442	0.148532	0.193462	0.2471	0.250569	0.28314	0.310003	0.350791	0.409082	0.45589	0.496094	0.555489	0.644735	0.739902	0.799643	0.881177	0.992188	1.14927	1.28364	1.71462	2.34487	5.57107
0	0	0	0	0	0	0.0512223	0.0984144	0.148557	0.193556	0.247321	0.251534	0.283203	0.31055	0.350791	0.410239	0.45946	0.496094	0.556075	0.64484	0.74128	0.799703	0.888208	0.992188	1.15194	1.28513	1.71748	2.35318	6.19172
0	0	0	0	0	0	0.0535727	0.0985982	0.149506	0.195511	0.247947	0.252255	0.283994	0.311091	0.350791	0.412198	0.460067	0.496094	0.556334	0.647028	0.741479	0.800866	0.890684	0.992188	1.15703	1.28881	1.7195	2.37387	6.20117
0	0	0	0	0	0	0.0541723	0.100966	0.149556	0.196389	0.248047	0.252557	0.28419	0.312077	0.350791	0.413429	0.461059	0.496094	0.556778	0.649395	0.742233	0.804134	0.895231	0.992188	1.15731	1.29171	1.71981	2.38146	6.42943
0	0	0	0	0	0	0.0544693	0.101295	0.149763	0.196454	0.248047	0.254312	0.284373	0.312516	0.351187	0.413527	0.46115	0.496094	0.557609	0.649484	0.742547	0.805807	0.899261	0.992188	1.16246	1.29233	1.75396	2.4011	6.51094
0	0	0	0	0	0	0.0548562	0.101338	0.151015	0.19708	0.248047	0.256702	0.284649	0.314457	0.352508	0.413964	0.463295	0.496094	0.558462	0.65213	0.742602	0.806788	0.904885	0.995438	1.16248	1.29932	1.75396	2.40795	6.5353
0	0	0	0	0	0	0.0556422	0.101456	0.151088	0.197996	0.248047	0.25714	0.284976	0.315156	0.353144	0.414446	0.463825	0.496094	0.559865	0.654824	0.743335	0.80986	0.907728	1.00217	1.16258	1.30802	1.7567	2.41639	6.74507
0	0	0	0	0	0	0.0567666	0.103025	0.151673	0.198394	0.248047	0.2575	0.285159	0.315202	0.354139	0.416349	0.463889	0.496094	0.560597	0.654931	0.744141	0.809961	0.908032	1.00243	1.16373	1.3147	1.76089	2.43073	6.82226
0	0	0	0	0	0	0.056957	0.103875	0.152222	0.198803	0.248047	0.258978	0.286838	0.315267	0.354481	0.416541	0.465411	0.496094	0.563591	0.65639	0.744141	0.810726	0.908501	1.00407	1.16809	1.3194	1.77282	2.45554	6.84268
0	0	0	0	0	0	0.0591264	0.107667	0.153351	0.200228	0.248047	0.259668	0.28721	0.316331	0.354972	0.417229	0.465994	0.496094	0.564479	0.658952	0.744141	0.811052	0.910332	1.00434	1.16964	1.32163	1.77416	2.45554	6.98947
0	0	0	0	0	0	0.0598597	0.108505	0.154566	0.201617	0.248047	0.261024	0.288196	0.316668	0.358024	0.418089	0.467128	0.496094	0.565157	0.662859	0.744141	0.811065	0.914282	1.00515	1.17355	1.32302	1.77567	2.46288	7.01583
0	0	0	0	0	0	0.0620883	0.109201	0.154697	0.201899	0.248047	0.262111	0.288769	0.317137	0.358025	0.4188	0.467589	0.496094	0.565799	0.663076	0.744141	0.812084	0.916135	1.00569	1.1753	1.32569	1.7866	2.48047	7.2096
0	0	0	0	0	0	0.0626392	0.110237	0.154829	0.202521	0.248047	0.263452	0.28879	0.320119	0.358071	0.419358	0.467974	0.496094	0.566768	0.663087	0.744141	0.814096	0.920867	1.00677	1.17796	1.32932	1.7873	2.48047	8.54233
0	0	0	0	0	0	0.0631153	0.110281	0.155471	0.202721	0.248047	0.263667	0.290334	0.322671	0.35858	0.419847	0.471196	0.496447	0.568619	0.6634	0.745104	0.814366	0.926251	1.00786	1.17816	1.33093	1.78869	2.48047	9.18109
0	0	0	0	0	0	0.0636293	0.111683	0.155471	0.203365	0.248047	0.264803	0.290376	0.324308	0.3592	0.424047	0.473481	0.500641	0.569897	0.667347	0.747318	0.817218	0.92899	1.00928	1.17966	1.33331	1.80023	2.49284	10.1336
0	0	0	0	0	0	0.0636496	0.112966	0.155896	0.203425	0.248047	0.265008	0.292399	0.3252	0.362293	0.426828	0.473919	0.500725	0.570134	0.670471	0.747442	0.81943	0.930076	1.02023	1.18284	1.33577	1.81099	2.52959	10.5267
0	0	0	0	0	0	0.0653712	0.114204	0.156121	0.20544	0.248047	0.26563	0.292422	0.326281	0.363362	0.427126	0.476127	0.501018	0.570702	0.671373	0.749001	0.821573	0.930512	1.02272	1.18308	1.33577	1.81329	2.55286	10.5966
0	0	0	0	0	0	0.0654765	0.114534	0.157807	0.205797	0.248047	0.266409	0.293703	0.327381	0.365068	0.42734	0.477388	0.503651	0.573996	0.671415	0.749131	0.821674	0.930637	1.02272	1.18992	1.33577	1.81627	2.5538	10.8802
0	0	0	0	0	0.00496094	0.0656735	0.114955	0.158451	0.208083	0.248047	0.266462	0.294876	0.327775	0.368097	0.427722	0.478424	0.503808	0.575513	0.673925	0.749835	0.825976	0.938039	1.02325	1.19111	1.33577	1.82677	2.5538	11.2963
0	0	0	0	0	0.0136251	0.0666878	0.115938	0.158685	0.208109	0.248047	0.266681	0.299997	0.329816	0.36874	0.432368	0.478511	0.503913	0.576599	0.676876	0.750691	0.826005	0.93919	1.02881	1.19173	1.34836	1.85229	2.5538	11.7659
0	0	0	0	0	0.0153759	0.066826	0.11596	0.160452	0.208387	0.248047	0.26948	0.301192	0.330119	0.370079	0.432512	0.47912	0.504504	0.577979	0.677481	0.754122	0.82924	0.939811	1.03454	1.21297	1.36543	1.85895	2.5538	14.5166
0	0	0	0	0	0.021179	0.0692985	0.116368	0.160989	0.208758	0.248047	0.271605	0.301841	0.33047	0.373227	0.433293	0.479598	0.505199	0.579194	0.678815	0.75748	0.832297	0.949527	1.03648	1.21391	1.37375	1.86657	2.55958	14.5166
0	0	0	0	0	0.0216402	0.0712981	0.117482	0.162104	0.209266	0.248047	0.2732	0.301856	0.330685	0.374052	0.433601	0.480318	0.506285	0.588097	0.68512	0.758865	0.83508	0.949581	1.038	1.2195	1.37791	1.86963	2.56489	14.5166
0	0	0	0	0	0.0232573	0.0717817	0.117763	0.162513	0.210038	0.248047	0.273278	0.303585	0.330989	0.374092	0.434893	0.482189	0.506551	0.590479	0.686068	0.761464	0.839223	0.951329	1.03971	1.22229	1.37834	1.87326	2.58969	14.6032
0	0	0	0	0	0.0238863	0.0722393	0.11865	0.162872	0.210202	0.248047	0.273928	0.303914	0.331385	0.375313	0.435504	0.482658	0.508673	0.590504	0.687	0.762486	0.839853	0.952482	1.04273	1.2251	1.38141	1.87908	2.58969	15.4706
0	0	0	0	0	0.0277283	0.0735798	0.119167	0.162943	0.210496	0.248047	0.27462	0.303972	0.331912	0.375322	0.436441	0.485146	0.509144	0.591475	0.687463	0.763032	0.840925	0.956142	1.048	1.23807	1.40317	1.88907	2.63677	16.1364
0	0	0	0	0	0.0314037	0.0742967	0.119463	0.164205	0.211759	0.248047	0.276407	0.30514	0.332112	0.375715	0.439434	0.487668	0.511436	0.592868	0.696299	0.763395	0.841606	0.957803	1.04921	1.23872	1.40317	1.89299	2.63772	16.4423
0	0	0	0	0	0.0317703	0.0754723	0.120244	0.164226	0.212662	0.248047	0.277873	0.306186	0.332992	0.377861	0.440631	0.489985	0.515094	0.597986	0.699502	0.763548	0.844484	0.959363	1.05395	1.24023	1.41795	1.90424	2.64376	16.6856
0	0	0	0	0	0.0318028	0.0768037	0.120545	0.164263	0.212761	0.248047	0.2782	0.306748	0.334502	0.379182	0.441181	0.490993	0.515417	0.598676	0.700149	0.767288	0.844566	0.960245	1.05548	1.24023	1.4187	1.90683	2.67155	17.278
0	0	0	0	0	0.033524	0.0775718	0.120868	0.165321	0.213839	0.248047	0.278539	0.306843	0.33483	0.379998	0.441532	0.491013	0.516323	0.600774	0.701583	0.767793	0.845117	0.965189	1.05601	1.24023	1.42251	1.91537	2.68304	17.8869
0	0	0	0	0	0.035675	0.0783681	0.121187	0.165322	0.213858	0.248047	0.279163	0.307247	0.335186	0.380366	0.442936	0.491109	0.519757	0.603313	0.701738	0.769315	0.847009	0.968957	1.06029	1.24023	1.42406	1.91954	2.70027	18.3102
0	0	0	0	0	0.0384803	0.0787006	0.121993	0.165585	0.214454	0.248047	0.279459	0.307815	0.335852	0.380745	0.444952	0.491309	0.521071	0.604458	0.702446	0.7703	0.847277	0.969158	1.06321	1.24023	1.42557	1.93005	2.70776	19.0027
0	0	0	0	0	0.0387527	0.0789156	0.122001	0.165773	0.215193	0.248047	0.280537	0.308572	0.336284	0.381601	0.445856	0.495549	0.52193	0.605362	0.702963	0.770956	0.85229	0.969851	1.06473	1.24023	1.42765	1.93731	2.73977	23.0737
0	0	0	0	0	0.0390304	0.0790507	0.123064	0.165958	0.216259	0.248047	0.282081	0.310139	0.33777	0.38266	0.447175	0.496046	0.524466	0.606911	0.707187	0.773457	0.853118	0.971236	1.0661	1.24023	1.43025	1.93731	2.75042	23.5056
0	0	0	0	0	0.0392826	0.0801944	0.124972	0.166266	0.216303	0.248047	0.283994	0.310422	0.337998	0.383677	0.451905	0.496094	0.526579	0.607701	0.708103	0.777721	0.85446	0.971609	1.06704	1.24023	1.43343	1.93731	2.76682	24.8654
0	0	0	0	0	0.0397783	0.0804713	0.126048	0.167272	0.216595	0.248047	0.284981	0.31055	0.338034	0.386563	0.45401	0.496094	0.526819	0.607805	0.709346	0.779432	0.855246	0.975525	1.06718	1.24023	1.43653	1.93731	2.77325	25.7252
0	0	0	0	0	0.0443437	0.0808576	0.126198	0.167821	0.21747	0.248047	0.285464	0.310734	0.338169	0.386653	0.456031	0.496094	0.528763	0.608679	0.709473	0.7808	0.857146	0.975619	1.07083	1.24023	1.44635	1.93731	2.77325	25.7611
0	0	0	0	0	0.0443479	0.0812084	0.126729	0.168449	0.218931	0.248047	0.286993	0.310777	0.340496	0.386843	0.45686	0.496094	0.529643	0.609492	0.70974	0.784393	0.858546	0.978158	1.07221	1.24023	1.44635	1.94076	2.77325	25.8552
0	0	0	0	0	0.0455227	0.0823112	0.127192	0.169673	0.219157	0.248047	0.287266	0.311241	0.341911	0.38764	0.459213	0.496094	0.53064	0.611023	0.711475	0.784393	0.858997	0.978817	1.07511	1.24023	1.45194	1.94265	2.77325	26.0556
0	0	0	0	0	0.0506893	0.0827879	0.12784	0.170343	0.219327	0.248047	0.287485	0.311961	0.343085	0.388273	0.461483	0.496094	0.531675	0.611391	0.711935	0.784393	0.86108	0.97996	1.07593	1.24023	1.45196	1.95361	2.77325	26.1487
0	0	0	0	0	0.0524672	0.08288	0.128716	0.170394	0.220451	0.248047	0.289395	0.312809	0.343808	0.389121	0.463338	0.496094	0.533344	0.613906	0.714335	0.790795	0.861736	0.980605	1.08196	1.24023	1.45248	1.95969	2.77325	26.1816
0	0	0	0	0	0.0533475	0.0830326	0.130152	0.171771	0.222775	0.248047	0.289582	0.312831	0.344132	0.389442	0.464971	0.496094	0.538109	0.615348	0.715352	0.794256	0.86358	0.983643	1.10223	1.24023	1.45712	1.97773	2.77325	26.8407
0	0	0	0	0	0.0553053	0.0833464	0.131846	0.172933	0.22324	0.248047	0.289956	0.31336	0.346246	0.390547	0.466844	0.496094	0.5386	0.615521	0.720538	0.796329	0.866116	0.983848	1.10341	1.24023	1.46057	1.98438	2.80633	32.894
0	0	0	0	0	0.0553174	0.0833483	0.133203	0.173505	0.223495	0.248047	0.290153	0.313909	0.349141	0.390785	0.467369	0.496094	0.542886	0.618495	0.721311	0.800258	0.867523	0.990941	1.1093	1.24023	1.47436	1.98438	2.82817	33.3169
0	0	0	0	0	0.0554895	0.083417	0.13367	0.173882	0.223672	0.248047	0.290382	0.314159	0.350791	0.394498	0.467425	0.496094	0.545187	0.621679	0.721968	0.802952	0.869988	0.991247	1.1093	1.24023	1.48204	1.98438	2.82817	34.382
0	0	0	0	0	0.0559533	0.085481	0.134361	0.174745	0.223876	0.248047	0.29187	0.316668	0.350791	0.39489	0.467594	0.496094	0.54655	0.622396	0.722412	0.803363	0.874083	0.992004	1.11231	1.24023	1.48245	1.994	2.84251	34.8336
0	0	0	0	0	0.0567526	0.0871737	0.134558	0.175499	0.224296	0.248047	0.292006	0.316926	0.350791	0.396623	0.467785	0.496094	0.549672	0.62242	0.726291	0.804829	0.876891	0.992071	1.11274	1.24023	1.49344	1.99558	2.84484	36.2564
0	0	0	0	0	0.0588059	0.0883327	0.135064	0.175501	0.224694	0.248047	0.293955	0.317741	0.350791	0.396819	0.468777	0.496094	0.552194	0.626481	0.727416	0.806788	0.877557	0.992188	1.119	1.24023	1.51819	1.99982	2.86222	36.7118
0	0	0	0	0	0.0589398	0.0887439	0.135282	0.176524	0.225718	0.248047	0.294347	0.318331	0.350791	0.396987	0.470151	0.496094	0.553418	0.631108	0.73039	0.807484	0.879129	0.992188	1.12429	1.24023	1.51903	1.99982	2.90092	37.7105
0	0	0	0	0	0.0591264	0.0893875	0.135848	0.177493	0.22595	0.248047	0.294525	0.318759	0.350791	0.397418	0.470256	0.496094	0.55465	0.631154	0.731794	0.808655	0.883207	0.992188	1.1244	1.24023	1.52763	1.99982	2.90357	38.708
0	0	0	0	0	0.0593773	0.0895206	0.136591	0.177852	0.226022	0.248047	0.294735	0.319044	0.350791	0.397445	0.470281	0.496675	0.55465	0.631855	0.732369	0.811809	0.883641	0.992188	1.12482	1.24023	1.55283	2.04545	2.91088	39.7069
0	0	0	0	0	0.0609514	0.0895958	0.136721	0.178411	0.227039	0.248047	0.294775	0.319377	0.350791	0.398126	0.471058	0.497007	0.55465	0.632074	0.732721	0.812305	0.884233	0.992188	1.12498	1.24023	1.56475	2.05773	2.91434	42.4675
0	0	0	0	0	0.0617198	0.0925298	0.136931	0.178716	0.22743	0.248047	0.294928	0.319571	0.350791	0.398239	0.471224	0.498901	0.55465	0.633974	0.73545	0.8146	0.888263	0.992188	1.12499	1.24051	1.56879	2.0675	2.91999	44.2122
0	0	0	0	0	0.0619805	0.097815	0.137111	0.179795	0.227593	0.248047	0.295496	0.321359	0.350923	0.398325	0.47356	0.499789	0.55465	0.636562	0.735474	0.817137	0.891374	0.992188	1.12773	1.24518	1.57967	2.08675	2.9307	45.8947
0	0	0	0	0	0.0621945	0.0981366	0.137897	0.179838	0.228215	0.248047	0.297603	0.321798	0.35107	0.400641	0.473785	0.500641	0.55465	0.63826	0.736384	0.819888	0.894346	0.992188	1.12843	1.24804	1.58277	2.09325	2.94778	46.5701
0	0	0	0	0	0.0623754	0.0984484	0.138364	0.180764	0.228368	0.248047	0.298242	0.322307	0.351403	0.402426	0.474176	0.500827	0.557609	0.639453	0.741747	0.819994	0.894651	0.992188	1.13208	1.2552	1.58827	2.09959	2.98688	49.5703
0	0	0	0	0	0.0648586	0.0986399	0.139395	0.180874	0.22943	0.248047	0.29923	0.322357	0.352186	0.403218	0.474962	0.502643	0.561568	0.642702	0.74244	0.822298	0.898315	0.992188	1.14016	1.25547	1.58827	2.10475	2.98688	50.0569
0	0	0	0	0	0.0667547	0.100853	0.139579	0.181145	0.229782	0.248047	0.299609	0.325551	0.353063	0.404836	0.476082	0.503478	0.563357	0.643965	0.743305	0.822358	0.907524	0.992188	1.14038	1.25755	1.59156	2.10475	2.99716	51.6897
0	0	0	0	0	0.0672591	0.102144	0.140932	0.18173	0.231603	0.248047	0.300915	0.326281	0.354293	0.404932	0.477102	0.503608	0.569668	0.646452	0.743472	0.826379	0.911891	0.992188	1.1409	1.25782	1.59333	2.11931	2.99716	52.7751
0	0	0	0	0	0.0675785	0.102152	0.141653	0.181945	0.232083	0.248047	0.301132	0.326847	0.355818	0.406464	0.477497	0.50489	0.570306	0.646915	0.744141	0.827181	0.917341	0.992188	1.14769	1.26089	1.62253	2.11931	3.01161	53.0438
0	0	0	0	0	0.0677538	0.103383	0.141759	0.182273	0.232718	0.248047	0.301379	0.32717	0.356577	0.40686	0.478158	0.505405	0.572686	0.651088	0.744141	0.828262	0.919162	0.992188	1.14922	1.2648	1.62315	2.13378	3.01797	53.7272
0	0	0	0	0	0.0677773	0.103973	0.142682	0.182697	0.233673	0.248047	0.301676	0.32747	0.357571	0.406972	0.479303	0.505474	0.573475	0.652563	0.744141	0.829996	0.927798	0.993193	1.15162	1.2648	1.63722	2.13378	3.0278	54.7639
0	0	0	0	0	0.0681082	0.104369	0.14481	0.183415	0.234142	0.248047	0.301703	0.32806	0.357705	0.409472	0.480816	0.506383	0.573996	0.654502	0.744141	0.830325	0.929386	0.994547	1.15214	1.2648	1.64098	2.13378	3.0278	54.8318
0	0	0	0	0	0.0702411	0.105443	0.145396	0.183687	0.234251	0.248047	0.302627	0.330668	0.357955	0.409617	0.48155	0.508636	0.574836	0.655451	0.744141	0.830578	0.931124	0.99845	1.15246	1.2648	1.65197	2.13378	3.05729	55.261
0	0	0	0	0	0.071	0.107746	0.145508	0.184431	0.234847	0.248047	0.303641	0.33083	0.360065	0.412035	0.482136	0.510084	0.574943	0.656203	0.744141	0.832604	0.93362	1.00092	1.15361	1.2648	1.65204	2.13378	3.10336	55.9669
0	0	0	0	0	0.0712981	0.107787	0.146164	0.184587	0.234954	0.248047	0.303783	0.333558	0.360327	0.412543	0.482294	0.510773	0.575282	0.658546	0.745975	0.834493	0.93383	1.00185	1.15402	1.2648	1.65431	2.13378	3.11475	56.6465
0	0	0	0	0	0.0715564	0.108719	0.14858	0.184766	0.235221	0.248047	0.303837	0.333855	0.361106	0.413418	0.482546	0.510789	0.57611	0.660365	0.746067	0.83571	0.938466	1.00498	1.15646	1.2648	1.66217	2.1431	3.13757	57.0168
0	0	0	0	0	0.0724386	0.108757	0.14865	0.185342	0.235629	0.248047	0.305097	0.334648	0.363104	0.413518	0.483517	0.515347	0.577609	0.661931	0.750073	0.843246	0.943078	1.00574	1.15828	1.2648	1.66395	2.16303	3.13757	59.1211
0	0	0	0	0	0.0732123	0.109245	0.148943	0.185841	0.235715	0.248047	0.305269	0.334803	0.364089	0.414186	0.483568	0.517311	0.57778	0.664044	0.750092	0.847911	0.944666	1.00718	1.16168	1.2648	1.66609	2.17178	3.1606	60.3468
0	0	0	0	0	0.0738616	0.110237	0.148989	0.187254	0.236462	0.248047	0.306439	0.336093	0.365177	0.415721	0.483575	0.517433	0.579789	0.664565	0.750914	0.84896	0.945327	1.00955	1.16186	1.2648	1.67086	2.1865	3.18616	60.9176
0	0	0	0	0	0.0743653	0.110343	0.149493	0.187344	0.237122	0.248047	0.307538	0.337863	0.365802	0.417571	0.483994	0.517586	0.580128	0.665656	0.751026	0.85019	0.947536	1.01353	1.16408	1.27303	1.68542	2.18727	3.19195	61.5561
0	0	0	0	0	0.0755799	0.110373	0.14998	0.187957	0.238306	0.248047	0.307815	0.337973	0.36677	0.420448	0.484986	0.517764	0.581579	0.666863	0.752527	0.851918	0.95396	1.01634	1.16695	1.27303	1.6933	2.19696	3.22461	61.7657
0	0	0	0	0	0.075615	0.110999	0.150206	0.188209	0.238797	0.248047	0.308809	0.338054	0.367318	0.420936	0.485078	0.518138	0.583214	0.667557	0.757984	0.852371	0.958784	1.01873	1.17159	1.27691	1.69745	2.20868	3.22461	63.9567
0	0	0	0	0	0.0758854	0.111113	0.150765	0.188931	0.239125	0.248047	0.30885	0.33857	0.368284	0.422526	0.485094	0.518368	0.584823	0.670111	0.758723	0.855663	0.960601	1.02411	1.17389	1.27831	1.69755	2.22018	3.25474	66.169
0	0	0	0	0.0121036	0.0770585	0.111622	0.151119	0.18895	0.239608	0.248047	0.308986	0.339249	0.36933	0.423053	0.487376	0.520195	0.585446	0.67085	0.759626	0.855934	0.965992	1.02546	1.17709	1.29299	1.69824	2.23119	3.25764	69.4124
0	0	0	0	0.0153494	0.0771582	0.112601	0.151387	0.189153	0.239688	0.248047	0.309042	0.340097	0.369594	0.423429	0.48751	0.520552	0.589179	0.671584	0.761955	0.858324	0.968178	1.02664	1.1771	1.29456	1.70455	2.23193	3.26446	70.8373
0	0	0	0	0.0207901	0.0773622	0.112966	0.151491	0.189518	0.24021	0.248047	0.309076	0.340168	0.37244	0.423943	0.488223	0.52193	0.589818	0.67177	0.763078	0.859283	0.974772	1.02771	1.17818	1.29703	1.71532	2.23242	3.26817	72.938
0	0	0	0	0.0210657	0.0777717	0.113643	0.151673	0.190552	0.240434	0.248047	0.309488	0.342025	0.373333	0.426169	0.489296	0.521964	0.590741	0.674323	0.763678	0.859397	0.975455	1.02869	1.1788	1.30555	1.72344	2.23521	3.26947	76.3247
0	0	0	0	0.02182	0.0784418	0.11476	0.151875	0.190773	0.240671	0.248047	0.310116	0.345172	0.373672	0.428631	0.489557	0.524197	0.591785	0.674726	0.765338	0.863245	0.977947	1.03117	1.18082	1.30673	1.72646	2.23761	3.27113	76.5131
0	0	0	0	0.0226529	0.0818376	0.115412	0.152568	0.191471	0.240972	0.248047	0.31055	0.345628	0.374113	0.429756	0.489571	0.52668	0.591882	0.681283	0.765543	0.86457	0.982556	1.03121	1.1816	1.30705	1.72663	2.23938	3.31315	77.6054
0	0	0	0	0.0226963	0.082119	0.116202	0.152685	0.192013	0.243173	0.248047	0.310825	0.346423	0.374282	0.431508	0.490538	0.52674	0.594153	0.689691	0.76653	0.866641	0.983044	1.03824	1.18187	1.3106	1.72778	2.24373	3.33713	80.8808
0	0	0	0	0.0227366	0.0827009	0.11741	0.15329	0.1922	0.243963	0.248047	0.310953	0.346517	0.374604	0.432085	0.491394	0.528755	0.595032	0.692845	0.766887	0.868313	0.98407	1.04001	1.18311	1.31145	1.72894	2.24616	3.33713	81.6451
0	0	0	0	0.0229202	0.0828934	0.117438	0.153518	0.192502	0.244741	0.248047	0.311241	0.346656	0.374678	0.434566	0.491416	0.531433	0.5951	0.69752	0.770513	0.870221	0.985359	1.04006	1.18407	1.32113	1.73565	2.24958	3.33713
0	0	0	0	0.0235556	0.0832124	0.117482	0.153974	0.193034	0.244777	0.248047	0.311265	0.347571	0.374849	0.43587	0.492167	0.532206	0.596003	0.698917	0.770846	0.870558	0.98698	1.04075	1.18436	1.32638	1.73633	2.2674	3.34041
0	0	0	0	0.0240954	0.0841922	0.117692	0.154322	0.193897	0.245445	0.248047	0.311827	0.348503	0.376191	0.436219	0.492379	0.535132	0.59751	0.70041	0.771472	0.870698	0.988188	1.04553	1.18543	1.3274	1.74349	2.28688	3.36569
0	0	0	0	0.0250822	0.0842799	0.117941	0.155477	0.194405	0.246008	0.248047	0.313909	0.348971	0.3769	0.436372	0.494607	0.535281	0.598044	0.70069	0.774105	0.871241	0.989383	1.04745	1.18879	1.33496	1.75145	2.28688	3.39704
0	0	0	0	0.0255648	0.0843149	0.11805	0.156641	0.194791	0.246807	0.248047	0.31445	0.349038	0.376918	0.437883	0.496094	0.535468	0.598111	0.701138	0.774793	0.871284	0.990295	1.04841	1.19156	1.33577	1.75282	2.31509	3.45489
0	0	0	0	0.0266347	0.0843755	0.119201	0.156968	0.195753	0.247708	0.250569	0.315175	0.349216	0.377774	0.438336	0.496094	0.535742	0.59997	0.701583	0.774869	0.874827	0.992188	1.04949	1.19214	1.33577	1.75347	2.33791	3.48334
0	0	0	0	0.0268499	0.0849488	0.119252	0.157759	0.195816	0.248047	0.250769	0.315332	0.349494	0.379236	0.439054	0.496094	0.536182	0.603781	0.702043	0.775242	0.876063	0.992188	1.05237	1.19247	1.33577	1.75396	2.34007	3.49508
0	0	0	0	0.0297367	0.0851029	0.120634	0.157993	0.195862	0.248047	0.25092	0.315722	0.350265	0.382283	0.440364	0.496094	0.536785	0.604809	0.703028	0.777237	0.877671	0.992188	1.05244	1.19942	1.33577	1.75396	2.34007	3.50791
0	0	0	0	0.0322661	0.0870575	0.120875	0.159443	0.196096	0.248047	0.251016	0.315837	0.350791	0.384535	0.44067	0.496094	0.5386	0.607456	0.703657	0.778608	0.879547	0.992188	1.05395	1.19967	1.33577	1.75396	2.34007	3.53777
0	0	0	0	0.0323228	0.0871986	0.122291	0.159556	0.197157	0.248047	0.251146	0.317333	0.350791	0.385326	0.441042	0.496094	0.539472	0.607783	0.70374	0.778645	0.880844	0.992188	1.05406	1.20001	1.33577	1.75396	2.34007	3.55149
0	0	0	0	0.0362429	0.0874915	0.124224	0.161231	0.197242	0.248047	0.251363	0.317355	0.350791	0.385875	0.442895	0.496094	0.539744	0.608178	0.705487	0.781615	0.884145	0.992188	1.05505	1.20035	1.33816	1.75958	2.34007	3.61162
0	0	0	0	0.0379611	0.0876881	0.125192	0.16135	0.197424	0.248047	0.252432	0.317522	0.350791	0.386852	0.443048	0.496094	0.542794	0.610734	0.705956	0.782199	0.884454	0.992188	1.05775	1.20414	1.34027	1.76717	2.34007	3.68748
0	0	0	0	0.0385056	0.087883	0.125207	0.16248	0.197706	0.248047	0.252519	0.318468	0.350791	0.388634	0.443509	0.496094	0.544562	0.613093	0.706777	0.783648	0.88598	0.992188	1.05936	1.20667	1.35696	1.7774	2.34007	3.68748
0	0	0	0	0.0385482	0.0894499	0.125957	0.162867	0.198386	0.248047	0.252539	0.31976	0.350791	0.389394	0.448103	0.496094	0.545691	0.614249	0.707941	0.784035	0.88744	0.992188	1.06077	1.21154	1.35932	1.78869	2.34007	3.68938
0	0	0	0	0.0390304	0.0900391	0.126141	0.163045	0.198686	0.248047	0.252941	0.320967	0.350791	0.389657	0.449492	0.496094	0.545953	0.614595	0.708073	0.784393	0.889262	0.992188	1.06197	1.21362	1.36193	1.78869	2.3443	3.7207
0	0	0	0	0.0393373	0.0909169	0.12617	0.163494	0.19884	0.248047	0.256292	0.322052	0.351133	0.389862	0.450336	0.496094	0.549896	0.614837	0.711095	0.784393	0.891042	0.992188	1.0629	1.21622	1.36816	1.78869	2.37009	3.75363
0	0	0	0	0.0394396	0.0915088	0.126297	0.163854	0.200229	0.248047	0.25643	0.322668	0.351818	0.390157	0.450696	0.496094	0.551309	0.615057	0.7166	0.784393	0.891982	0.992188	1.06907	1.22325	1.39397	1.79495	2.37821	3.75476
0	0	0	0	0.0395578	0.0924975	0.12658	0.164635	0.201348	0.248047	0.25916	0.324013	0.352051	0.390837	0.451292	0.496094	0.552729	0.615561	0.718545	0.786199	0.894346	0.993137	1.07103	1.2303	1.39527	1.79932	2.38711	3.77257
0	0	0	0	0.0397781	0.0936574	0.12766	0.164727	0.202405	0.248047	0.260348	0.324551	0.353957	0.391474	0.451618	0.496094	0.552983	0.617379	0.71936	0.786998	0.894346	0.995225	1.07758	1.23534	1.39755	1.80205	2.41804	3.78627
0	0	0	0	0.0405968	0.0938562	0.127744	0.165193	0.202866	0.248047	0.2604	0.326526	0.354746	0.39331	0.452027	0.496094	0.553447	0.617803	0.719378	0.787017	0.894346	0.997069	1.0825	1.23951	1.40168	1.80556	2.42133	3.79439
0	0	0	0	0.0406905	0.0949459	0.128556	0.165321	0.204013	0.248047	0.261795	0.327112	0.355165	0.393566	0.452274	0.496094	0.55465	0.619216	0.71962	0.788196	0.894346	0.997767	1.08539	1.23995	1.40317	1.82458	2.42859	3.79439
0	0	0	0	0.041278	0.0950529	0.12857	0.166317	0.204126	0.248047	0.261879	0.327377	0.355791	0.394056	0.453103	0.496094	0.55465	0.622637	0.72079	0.788488	0.894346	0.998477	1.08612	1.24023	1.40317	1.84491	2.44298	3.79439
0	0	0	0	0.0415612	0.0969939	0.128743	0.167456	0.204442	0.248047	0.262851	0.328976	0.356217	0.395759	0.455081	0.496094	0.55465	0.623286	0.722494	0.790139	0.894346	0.99965	1.08661	1.24023	1.41211	1.85131	2.45554	3.79439
0	0	0	0	0.0423378	0.0976871	0.129224	0.16796	0.207602	0.248047	0.267519	0.329098	0.35646	0.395795	0.455431	0.496094	0.55465	0.624948	0.723252	0.791543	0.896378	1.00006	1.08794	1.24023	1.4173	1.85179	2.47109	3.80327
0	0	0	0	0.0424128	0.101294	0.130084	0.168545	0.208497	0.248047	0.26801	0.331072	0.356647	0.396532	0.456879	0.496217	0.555203	0.625596	0.727186	0.791969	0.898559	1.00194	1.08816	1.24023	1.42141	1.8694	2.47215	3.81687
0	0	0	0	0.0424885	0.101429	0.130465	0.168808	0.211101	0.248047	0.268478	0.331441	0.356686	0.399625	0.456936	0.500017	0.55535	0.627961	0.727683	0.792631	0.903621	1.00264	1.09229	1.24023	1.43176	1.87165	2.48047	3.81805
0	0	0	0	0.0425619	0.101991	0.131097	0.169399	0.211271	0.248047	0.269211	0.332467	0.357534	0.400255	0.457843	0.500627	0.556073	0.628111	0.728841	0.794041	0.912125	1.00367	1.0955	1.24023	1.43625	1.88319	2.48047	3.82416
0	0	0	0	0.0440143	0.102708	0.131362	0.171157	0.211708	0.248047	0.269315	0.332632	0.358018	0.401015	0.458021	0.50123	0.556145	0.629404	0.729709	0.796009	0.912507	1.00373	1.10282	1.24023	1.43675	1.88907	2.48047	3.85072
0	0	0	0	0.0476934	0.102857	0.131521	0.171338	0.2121	0.248047	0.271434	0.334648	0.358445	0.401345	0.458705	0.5021	0.556282	0.629619	0.731203	0.797386	0.916605	1.00451	1.1093	1.24023	1.43679	1.89083	2.48047	3.85072
0	0	0	0	0.048497	0.1032	0.131524	0.171414	0.212541	0.248047	0.271605	0.335966	0.361665	0.404202	0.459166	0.502369	0.559232	0.630338	0.731375	0.800344	0.917326	1.00552	1.1093	1.24023	1.44635	1.89836	2.48047	3.91762
0	0	0	0	0.0495773	0.103443	0.131621	0.172065	0.21435	0.248047	0.271741	0.336174	0.361751	0.404842	0.459811	0.502784	0.5595	0.630688	0.732676	0.804003	0.918059	1.00683	1.1093	1.24023	1.45471	1.90726	2.48371	3.92197
0	0	0	0	0.0515615	0.10382	0.132986	0.173495	0.214624	0.248047	0.272756	0.338673	0.362382	0.405621	0.459836	0.503844	0.559894	0.630852	0.736142	0.807317	0.920546	1.00839	1.1093	1.24023	1.47209	1.90959	2.48949	3.92197
0	0	0	0	0.0522882	0.10396	0.132995	0.173715	0.215561	0.248047	0.27437	0.339077	0.36281	0.406643	0.4613	0.503905	0.562423	0.631166	0.736223	0.808404	0.921249	1.00887	1.10984	1.24023	1.4815	1.93163	2.4924	3.92197
0	0	0	0	0.0522882	0.103992	0.133216	0.174208	0.215831	0.248047	0.275315	0.33927	0.363333	0.40686	0.462341	0.503997	0.563809	0.631556	0.739724	0.808519	0.925326	1.01234	1.11067	1.24023	1.48173	1.9336	2.49284	3.95024
0	0	0	0	0.0543726	0.104205	0.134165	0.174645	0.216297	0.248047	0.275336	0.339629	0.363595	0.407125	0.462723	0.504355	0.565257	0.632698	0.740255	0.810025	0.926467	1.01314	1.11444	1.24023	1.48612	1.93731	2.49284	4.03758
0	0	0	0	0.0564623	0.10459	0.134278	0.174867	0.216914	0.248047	0.275596	0.341694	0.364969	0.407339	0.464711	0.505982	0.566839	0.632889	0.740649	0.811498	0.931343	1.01513	1.11454	1.24023	1.48828	1.93731	2.49284	4.05333
0	0	0	0	0.0569245	0.104749	0.134716	0.174928	0.217842	0.248047	0.276201	0.342047	0.365068	0.407842	0.465703	0.508133	0.56714	0.633084	0.743678	0.811684	0.936302	1.0162	1.1188	1.24023	1.48828	1.93731	2.49419	4.06131
0	0	0	0	0.057463	0.105161	0.135335	0.175249	0.218268	0.248047	0.276461	0.342251	0.365425	0.407929	0.466233	0.509587	0.567718	0.633873	0.743781	0.817375	0.937308	1.01713	1.12165	1.24023	1.50469	1.93731	2.50092	4.07183
0	0	0	0	0.0591264	0.105637	0.136591	0.175369	0.218384	0.248047	0.276891	0.342576	0.36563	0.409565	0.466624	0.509765	0.567749	0.634224	0.743868	0.817875	0.937777	1.01841	1.12267	1.24023	1.50778	1.93731	2.51618	4.14554
0	0	0	0	0.059473	0.105779	0.137628	0.175516	0.218429	0.248047	0.276963	0.343387	0.365647	0.40977	0.46665	0.510545	0.569497	0.634334	0.744141	0.820276	0.938303	1.02272	1.12332	1.24023	1.50881	1.94697	2.52959	4.18069
0	0	0	0	0.0598869	0.105792	0.137655	0.176243	0.219612	0.248047	0.277068	0.344239	0.365955	0.409834	0.467039	0.511395	0.569581	0.638361	0.744141	0.824098	0.938699	1.02272	1.12661	1.24023	1.52729	1.97544	2.52959	4.18795
0	0	0	0	0.0602238	0.105913	0.137882	0.177353	0.220049	0.248047	0.277133	0.344263	0.365959	0.411351	0.467084	0.512161	0.570522	0.638765	0.744141	0.825392	0.939607	1.02272	1.13307	1.24023	1.5341	1.983	2.5538	4.22409
0	0	0	0	0.0602515	0.105913	0.138071	0.178226	0.220053	0.248047	0.277275	0.34523	0.366963	0.412249	0.467535	0.513314	0.572111	0.638888	0.744141	0.826063	0.940491	1.02326	1.13386	1.24023	1.5411	1.98438	2.5538	4.27846
0	0	0	0	0.0605471	0.105967	0.139054	0.178272	0.220285	0.248047	0.278446	0.345643	0.367473	0.412655	0.468507	0.513523	0.572274	0.641622	0.744141	0.826727	0.943429	1.02567	1.13452	1.24023	1.54394	1.98438	2.5538	4.30795
0	0	0	0	0.0624142	0.106061	0.13923	0.179947	0.22062	0.248047	0.279283	0.346089	0.37099	0.413705	0.468858	0.513637	0.572347	0.642693	0.744141	0.829112	0.943472	1.02639	1.13499	1.24023	1.5466	1.98438	2.5538	4.31519
0	0	0	0	0.0635629	0.10695	0.139359	0.181356	0.220923	0.248047	0.279525	0.346231	0.371391	0.413902	0.470012	0.514354	0.575102	0.643033	0.744141	0.829705	0.94543	1.02663	1.13716	1.24023	1.55666	1.996	2.5538	4.33753
0	0	0	0	0.0647518	0.107025	0.139413	0.181894	0.221305	0.248047	0.28086	0.348547	0.372279	0.415119	0.470578	0.515669	0.575634	0.645263	0.744141	0.831189	0.945453	1.0278	1.13798	1.24023	1.56879	1.99982	2.5538	4.38922
0	0	0	0	0.0648386	0.107386	0.139973	0.181979	0.221701	0.248047	0.281938	0.34864	0.372513	0.41522	0.470587	0.516223	0.579245	0.645609	0.744141	0.836195	0.948176	1.03108	1.13969	1.24023	1.56879	1.99982	2.55623	4.41658
0	0	0	0	0.0658223	0.107478	0.140833	0.182013	0.222775	0.248047	0.283356	0.350791	0.372924	0.415239	0.470853	0.517146	0.581314	0.647868	0.744141	0.838082	0.949819	1.03357	1.14278	1.24023	1.57234	1.99982	2.57263	4.41709
0	0	0	0	0.0663283	0.107755	0.140834	0.182137	0.223861	0.248047	0.284402	0.350791	0.373099	0.415468	0.473144	0.517898	0.581582	0.651342	0.744141	0.840303	0.950178	1.03436	1.14375	1.25291	1.57491	1.99982	2.58969	4.43848
0	0	0	0	0.0670121	0.109103	0.141031	0.182202	0.223998	0.248047	0.286143	0.350791	0.376176	0.417241	0.473445	0.518368	0.582885	0.652111	0.744141	0.843577	0.950462	1.0398	1.14464	1.25449	1.58495	1.99982	2.58969	4.44528
0	0	0	0	0.0675359	0.109188	0.141144	0.182206	0.224184	0.248047	0.286312	0.350791	0.376556	0.418524	0.474432	0.519151	0.584062	0.65383	0.7447	0.843727	0.950544	1.03987	1.14908	1.2618	1.58827	1.99982	2.58969	4.45064
0	0	0	0	0.0676178	0.110078	0.141281	0.182676	0.224622	0.248047	0.287554	0.350791	0.376676	0.419409	0.474459	0.519251	0.584137	0.653935	0.748838	0.844282	0.954152	1.04214	1.14945	1.2648	1.58827	2.04039	2.63192	4.45199
0	0	0	0	0.0680247	0.110368	0.141359	0.183538	0.224653	0.248047	0.287909	0.350791	0.37737	0.420296	0.474468	0.521288	0.584334	0.65501	0.754408	0.847845	0.955605	1.04563	1.15124	1.2648	1.58827	2.04048	2.63677	4.47173
0	0	0	0	0.0684701	0.111678	0.14199	0.184422	0.224825	0.248047	0.288952	0.350791	0.378327	0.421102	0.475036	0.521541	0.585342	0.656997	0.757597	0.84897	0.957116	1.04622	1.1529	1.2648	1.58827	2.04288	2.63677	4.64059
0	0	0	0	0.0695991	0.112081	0.142029	0.184516	0.224956	0.248047	0.289017	0.350791	0.37908	0.421589	0.476504	0.521543	0.585374	0.657104	0.75781	0.849392	0.959769	1.04676	1.15575	1.2648	1.58836	2.07078	2.63677	4.68014
0	0	0	0	0.069948	0.112142	0.142255	0.185785	0.22571	0.248047	0.289029	0.350791	0.379284	0.422148	0.477221	0.52193	0.586578	0.660327	0.7593	0.849981	0.964212	1.04879	1.15616	1.2648	1.58971	2.08261	2.67133	4.69158
0	0	0	0	0.0708637	0.112966	0.142421	0.185828	0.225834	0.248047	0.289272	0.350791	0.379327	0.422497	0.477572	0.52295	0.58816	0.664621	0.759884	0.850195	0.964737	1.05188	1.16055	1.2648	1.5969	2.08639	2.67155	4.78511
0	0	0	0	0.0709095	0.113409	0.142763	0.186636	0.226257	0.248047	0.289552	0.350791	0.379541	0.423041	0.479981	0.523209	0.588284	0.666158	0.760416	0.850361	0.967008	1.05196	1.16225	1.2648	1.59963	2.08791	2.67155	4.79589
0	0	0	0	0.0719443	0.113576	0.144477	0.187153	0.226288	0.248047	0.290528	0.350791	0.38069	0.425736	0.479987	0.523388	0.588377	0.66758	0.760805	0.852037	0.970736	1.05237	1.16528	1.2648	1.60442	2.08933	2.67155	4.81798
0	0	0	0	0.0721183	0.114027	0.144896	0.18724	0.227923	0.248047	0.29149	0.351151	0.381196	0.426889	0.480537	0.523433	0.588722	0.670108	0.761632	0.852836	0.970882	1.05237	1.16594	1.2648	1.60571	2.09339	2.68304	4.89225
0	0	0	0	0.0730746	0.114735	0.145229	0.187483	0.227991	0.248047	0.291735	0.351506	0.381534	0.427896	0.481729	0.523758	0.590031	0.670177	0.762131	0.853746	0.971761	1.05468	1.1677	1.2648	1.61262	2.09372	2.68304	4.89225
0	0	0	0	0.0732803	0.115109	0.145641	0.188264	0.228954	0.248047	0.29201	0.35151	0.382312	0.429546	0.481782	0.524152	0.591918	0.674011	0.764775	0.859802	0.972196	1.06285	1.17192	1.26731	1.61633	2.10438	2.68304	4.96713
0	0	0	0	0.0733566	0.115209	0.145703	0.18835	0.228993	0.248047	0.292338	0.351679	0.383532	0.430021	0.482133	0.52436	0.59314	0.674186	0.765512	0.860194	0.972803	1.06457	1.17776	1.27753	1.61757	2.10475	2.68996	5.03253
0	0	0	0	0.0734471	0.116725	0.146743	0.188556	0.229074	0.248047	0.292795	0.352958	0.386014	0.431193	0.483603	0.525218	0.594147	0.674527	0.766392	0.862023	0.975583	1.06638	1.17978	1.283	1.61759	2.10475	2.69796	5.04036
0	0	0	0	0.0734763	0.116761	0.147179	0.189025	0.23023	0.248047	0.293556	0.35296	0.386743	0.43143	0.486142	0.525698	0.594688	0.677864	0.767093	0.862698	0.977116	1.06974	1.18404	1.29407	1.6232	2.10475	2.72109	5.05076
0	0	0	0	0.0738644	0.11687	0.147677	0.189127	0.231012	0.248047	0.293682	0.354207	0.388852	0.432706	0.48632	0.52681	0.595902	0.679677	0.76923	0.862978	0.983571	1.0701	1.18444	1.29843	1.62475	2.10475	2.73249	5.05912
0	0	0	0	0.0739049	0.116917	0.147888	0.189152	0.231094	0.248047	0.293735	0.354368	0.38971	0.433743	0.486883	0.526965	0.597665	0.68135	0.769881	0.86481	0.984343	1.07056	1.19475	1.30212	1.62844	2.11931	2.73517	5.0786
0	0	0	0.00204545	0.0754422	0.117537	0.148402	0.18947	0.232675	0.248047	0.293738	0.354724	0.390061	0.435342	0.48749	0.528493	0.598044	0.683735	0.772691	0.865279	0.9863	1.07251	1.19541	1.30548	1.62977	2.13378	2.73977	5.08741
0	0	0	0.00342134	0.075599	0.117846	0.149602	0.189695	0.232893	0.248047	0.293942	0.355006	0.391578	0.435779	0.488064	0.530074	0.598046	0.686107	0.772733	0.865434	0.987143	1.07309	1.19824	1.30663	1.64533	2.13378	2.75723	5.1076
0	0	0	0.0070213	0.0763108	0.117848	0.149813	0.189795	0.233184	0.248047	0.294211	0.35646	0.391605	0.436219	0.488892	0.53202	0.598667	0.687477	0.773061	0.866134	0.990218	1.07391	1.2046	1.30775	1.6485	2.13378	2.75892	5.1076
0	0	0	0.0073687	0.0764094	0.118005	0.150601	0.189827	0.233204	0.248047	0.294901	0.356729	0.391758	0.437377	0.489025	0.534442	0.601038	0.689102	0.773697	0.871985	0.992188	1.07637	1.20583	1.31189	1.65315	2.13378	2.76515	5.1076
0	0	0	0.00738018	0.076819	0.119533	0.150715	0.190197	0.233793	0.248047	0.294978	0.357705	0.391772	0.438764	0.489142	0.538233	0.601712	0.69048	0.774463	0.872809	0.992188	1.0773	1.20669	1.31211	1.65344	2.13378	2.77325	5.11754
0	0	0	0.00861494	0.0771007	0.119702	0.150787	0.190904	0.234012	0.248047	0.295397	0.357932	0.392055	0.440175	0.490285	0.5386	0.602365	0.691878	0.775845	0.874023	0.992188	1.07874	1.20818	1.31433	1.65562	2.13378	2.77325	5.1912
0	0	0	0.00943312	0.0771566	0.120618	0.15079	0.191021	0.234186	0.248047	0.295424	0.358242	0.392771	0.44141	0.491373	0.539744	0.603713	0.692509	0.777177	0.874591	0.992188	1.07953	1.21231	1.33098	1.66395	2.13378	2.77325	5.19867
0	0	0	0.010849	0.0771806	0.120751	0.151548	0.19209	0.234816	0.248047	0.29565	0.358776	0.393229	0.441998	0.491932	0.54147	0.604023	0.694567	0.779769	0.883871	0.992188	1.08011	1.22185	1.33516	1.66395	2.13378	2.77325	5.24328
0	0	0	0.0108759	0.0773145	0.122254	0.15164	0.192246	0.236152	0.248047	0.296666	0.359114	0.394097	0.443388	0.492892	0.541552	0.604474	0.695473	0.78025	0.884065	0.992188	1.08162	1.2227	1.33577	1.67279	2.13378	2.77325	5.25794
0	0	0	0.0110151	0.0780008	0.122322	0.152268	0.192858	0.236643	0.248047	0.296845	0.359487	0.395216	0.443591	0.495414	0.541713	0.60475	0.696387	0.780443	0.884607	0.992188	1.08403	1.23235	1.33577	1.67485	2.13388	2.77325	5.27645
0	0	0	0.0174538	0.0786309	0.122369	0.152316	0.193557	0.238395	0.248047	0.298735	0.359543	0.395454	0.445643	0.495536	0.542952	0.60486	0.696845	0.780866	0.886349	0.992188	1.0864	1.23806	1.33577	1.6835	2.14789	2.77325	5.27955
0	0	0	0.0182656	0.0792711	0.122777	0.153197	0.193578	0.238451	0.248047	0.299044	0.360025	0.395751	0.446217	0.495709	0.544107	0.605846	0.698036	0.780919	0.889016	0.992188	1.08834	1.24023	1.33577	1.6844	2.15029	2.77325	5.28829
0	0	0	0.0198825	0.0799598	0.123732	0.153572	0.193654	0.239735	0.248047	0.299581	0.361763	0.39678	0.447383	0.496094	0.545691	0.609728	0.698719	0.781803	0.889438	0.992188	1.08997	1.24023	1.34113	1.69014	2.15445	2.77325	5.29081
0	0	0	0.0198906	0.0804901	0.124239	0.155845	0.194508	0.240646	0.248047	0.299609	0.361964	0.399557	0.448113	0.496094	0.5459	0.609912	0.699024	0.783014	0.89166	0.992188	1.09173	1.24023	1.34125	1.69146	2.16748	2.77325	5.31246
0	0	0	0.0201888	0.0807233	0.124455	0.156023	0.194777	0.241105	0.248047	0.299931	0.36202	0.400211	0.448118	0.496094	0.546007	0.610221	0.699157	0.783777	0.894136	0.992638	1.0959	1.24023	1.34267	1.69456	2.18312	2.77325	5.31631
0	0	0	0.020752	0.0816736	0.125111	0.156685	0.194988	0.241833	0.248047	0.300824	0.362102	0.400397	0.448183	0.496094	0.546796	0.610812	0.699214	0.784248	0.894346	0.992781	1.09701	1.24023	1.3461	1.6974	2.18333	2.80919	5.33423
0	0	0	0.0208743	0.0823682	0.125178	0.156879	0.195029	0.242447	0.248047	0.301929	0.362594	0.400637	0.448326	0.496094	0.546831	0.613857	0.699849	0.784393	0.894346	0.993185	1.09899	1.24023	1.35211	1.70589	2.20549	2.82076	5.41318
0	0	0	0.0209801	0.082647	0.12589	0.157661	0.195622	0.244828	0.248047	0.302458	0.362611	0.400981	0.44836	0.496094	0.547406	0.614821	0.701623	0.784393	0.895643	0.993973	1.10148	1.24023	1.3588	1.70637	2.20976	2.82557	5.54539
0	0	0	0.0229634	0.0827314	0.126406	0.157949	0.197157	0.245562	0.248047	0.302577	0.362984	0.401862	0.448724	0.496094	0.549324	0.617202	0.703922	0.784393	0.896156	0.994378	1.10249	1.24023	1.35996	1.71268	2.21283	2.82817	5.5465
0	0	0	0.0235465	0.0832048	0.127468	0.158696	0.197834	0.245619	0.248047	0.303298	0.363284	0.402856	0.449357	0.496094	0.55043	0.617379	0.70423	0.78592	0.896765	0.994383	1.1033	1.24023	1.36296	1.71433	2.2186	2.82817	6.20117
0	0	0	0.0246959	0.0835526	0.127729	0.159254	0.198208	0.24668	0.248929	0.303351	0.364934	0.40348	0.449615	0.496094	0.551208	0.620024	0.7046	0.787092	0.89696	0.995068	1.10334	1.24023	1.37936	1.72985	2.22053	2.82817	6.27173
0	0	0	0.0268653	0.0837342	0.127784	0.159906	0.198768	0.246891	0.250424	0.303469	0.364984	0.403889	0.450128	0.496094	0.551287	0.622154	0.705259	0.78859	0.899023	0.996696	1.10802	1.24023	1.38452	1.73171	2.22205	2.83042	6.28271
0	0	0	0.0273257	0.0841088	0.128209	0.160128	0.199004	0.246988	0.250843	0.304246	0.365063	0.40441	0.450561	0.496094	0.551729	0.622935	0.70743	0.79001	0.900755	0.997576	1.10877	1.24023	1.38777	1.74401	2.22998	2.83848	6.47062
0	0	0	0.0311684	0.0841396	0.12853	0.16024	0.19943	0.248047	0.251487	0.304917	0.365768	0.406653	0.450718	0.496094	0.553237	0.625509	0.707511	0.794762	0.90453	0.997976	1.1093	1.24023	1.38937	1.74833	2.23195	2.84468	6.51094
0	0	0	0.0313487	0.0842846	0.129535	0.160754	0.199522	0.248047	0.251701	0.305192	0.365804	0.406833	0.451172	0.496094	0.554606	0.62639	0.708251	0.796197	0.904595	1.00057	1.1093	1.24023	1.39226	1.74894	2.23242	2.84931	6.52898
0	0	0	0.0316746	0.084465	0.129838	0.161118	0.200538	0.248047	0.252149	0.306506	0.36583	0.40686	0.451833	0.496094	0.55465	0.627914	0.711094	0.797279	0.905552	1.00143	1.10938	1.24023	1.39292	1.75396	2.23242	2.87299	6.62386
0	0	0	0.032604	0.0848687	0.129955	0.161127	0.200833	0.248047	0.25271	0.307561	0.365869	0.40876	0.453678	0.496094	0.55465	0.629952	0.714664	0.799011	0.905689	1.00458	1.11189	1.24023	1.40317	1.75396	2.24249	2.88281	6.64729
0	0	0	0.0326219	0.0849828	0.130472	0.161559	0.201144	0.248047	0.252941	0.307657	0.367862	0.408793	0.454263	0.496094	0.55465	0.630146	0.716264	0.800107	0.908287	1.0046	1.11294	1.24023	1.40317	1.75396	2.24392	2.88886	6.68695
0	0	0	0.0338259	0.0852394	0.130799	0.16248	0.201284	0.248047	0.253117	0.30807	0.368092	0.409685	0.454273	0.496094	0.55465	0.63039	0.716581	0.800786	0.908421	1.00571	1.11632	1.24023	1.40317	1.75396	2.24616	2.8927	6.84268
0	0	0	0.0339906	0.0853408	0.131026	0.164157	0.20181	0.248047	0.254034	0.308525	0.368613	0.410034	0.454604	0.496094	0.55465	0.630551	0.718964	0.802966	0.909645	1.00674	1.11697	1.24023	1.40777	1.75396	2.26064	2.89439	6.94604
0	0	0	0.0341398	0.0858648	0.131441	0.164233	0.201965	0.248047	0.254763	0.308911	0.368752	0.410067	0.454901	0.496094	0.55465	0.630676	0.718988	0.804959	0.910066	1.00748	1.11938	1.24023	1.41244	1.75396	2.26972	2.89928	7.01583
0	0	0	0.034922	0.0870169	0.131728	0.16459	0.202322	0.248047	0.254953	0.308984	0.369692	0.410301	0.455149	0.496094	0.55465	0.631334	0.720427	0.806481	0.911441	1.00768	1.12147	1.24023	1.41557	1.75396	2.27582	2.90346	7.01583
0	0	0	0.034944	0.0872014	0.132052	0.164632	0.202521	0.248047	0.255466	0.309454	0.369953	0.410957	0.455525	0.496094	0.554987	0.631736	0.720766	0.808234	0.912331	1.00957	1.1215	1.24023	1.41593	1.75396	2.28655	2.92248	7.19336
0	0	0	0.0350328	0.0872353	0.133257	0.164842	0.203039	0.248047	0.255485	0.309489	0.370564	0.411573	0.455578	0.496094	0.555203	0.632408	0.722325	0.808303	0.91277	1.01203	1.12557	1.24023	1.42354	1.7563	2.28688	2.93275	7.21045
0	0	0	0.0366858	0.087575	0.133298	0.165613	0.203204	0.248047	0.256007	0.310076	0.370885	0.411869	0.455879	0.496094	0.556073	0.63587	0.723432	0.809634	0.913917	1.01286	1.12805	1.24023	1.42693	1.76035	2.28688	2.95737	7.2445
0	0	0	0.0379167	0.0878734	0.133416	0.165695	0.203208	0.248047	0.25742	0.310275	0.371116	0.412684	0.456132	0.496094	0.556665	0.63649	0.726962	0.809979	0.918057	1.01345	1.12931	1.24023	1.4356	1.76373	2.28688	2.97133	7.33456
0	0	0	0.038956	0.0883695	0.134027	0.165846	0.203318	0.248047	0.257989	0.310304	0.371563	0.413702	0.456333	0.496094	0.557014	0.637567	0.727092	0.81029	0.922747	1.01907	1.13295	1.24023	1.44635	1.77437	2.29476	2.98688	7.37496
0	0	0	0.0390424	0.0885949	0.134232	0.166857	0.204214	0.248047	0.258446	0.311358	0.37199	0.413769	0.456949	0.496094	0.557894	0.641113	0.728886	0.811217	0.924113	1.01942	1.13637	1.24023	1.44635	1.77871	2.30232	2.98688	7.83818
0	0	0	0.0397649	0.0886677	0.134534	0.167637	0.205813	0.248047	0.258574	0.311912	0.37208	0.414912	0.45733	0.496094	0.55829	0.641709	0.729711	0.811672	0.925478	1.02019	1.13719	1.24023	1.44635	1.78509	2.30329	2.98895	8.5675
0	0	0	0.0414001	0.0889335	0.13474	0.169118	0.206723	0.248047	0.259012	0.312507	0.37306	0.417352	0.457576	0.497012	0.559489	0.642422	0.732041	0.811998	0.92604	1.02272	1.13898	1.2411	1.45039	1.78869	2.30407	2.98926	8.6639
0	0	0	0.0417215	0.0893107	0.134808	0.169399	0.207449	0.248047	0.259532	0.312794	0.373121	0.417666	0.458118	0.497262	0.56195	0.645439	0.733415	0.813454	0.926322	1.02272	1.14053	1.24335	1.45647	1.78869	2.30525	2.99653	8.76627
0	0	0	0.0420207	0.0900219	0.135202	0.170277	0.207613	0.248047	0.259748	0.312846	0.373366	0.418321	0.458407	0.497574	0.562449	0.646131	0.734318	0.813978	0.930307	1.02355	1.14194	1.24537	1.46038	1.79023	2.32758	2.99716	9.17773
0	0	0	0.0424225	0.0903603	0.135323	0.170386	0.207724	0.248047	0.260047	0.313472	0.373417	0.418954	0.458785	0.497998	0.562721	0.646665	0.736086	0.814503	0.931373	1.02358	1.14271	1.24657	1.46336	1.79062	2.33185	2.99716	9.21787
0	0	0	0.0455517	0.0906037	0.13585	0.171352	0.208133	0.248047	0.261172	0.313909	0.373793	0.419663	0.459124	0.498082	0.562845	0.647818	0.739191	0.815068	0.93211	1.02446	1.14303	1.2513	1.46424	1.7971	2.34007	2.99716	9.67383
0	0	0	0.0462667	0.0915001	0.136224	0.171405	0.208362	0.248047	0.261326	0.314313	0.374036	0.419952	0.459436	0.499704	0.562849	0.647839	0.740208	0.815102	0.937198	1.02447	1.14418	1.25332	1.47464	1.8024	2.34007	3.00537	10.1336
0	0	0	0.046598	0.0915458	0.136711	0.171435	0.209887	0.248047	0.261777	0.314546	0.374349	0.420398	0.460929	0.500064	0.563933	0.648045	0.740835	0.815776	0.937914	1.0284	1.14555	1.25462	1.47725	1.80754	2.34007	3.0278	10.5966
0	0	0	0.0473089	0.0916295	0.136835	0.171723	0.210033	0.248047	0.261778	0.315255	0.375227	0.420605	0.461601	0.500592	0.564461	0.648455	0.742788	0.81618	0.93819	1.0311	1.14569	1.26037	1.4787	1.80892	2.34007	3.07291	11.2963
0	0	0	0.0476297	0.0916997	0.136881	0.172316	0.21146	0.248047	0.261917	0.315288	0.375441	0.421301	0.463839	0.502574	0.56466	0.649624	0.743103	0.816457	0.939394	1.03122	1.14724	1.26196	1.48599	1.82182	2.34007	3.07292	11.7659
0	0	0	0.0476921	0.0919075	0.13702	0.173481	0.211783	0.248047	0.262392	0.318091	0.376229	0.421382	0.466015	0.502635	0.565098	0.650111	0.743494	0.817641	0.940072	1.03687	1.14872	1.26393	1.48828	1.83223	2.34007	3.07506	12.1644
0	0	0	0.04902	0.0922979	0.137445	0.173515	0.214039	0.248047	0.262512	0.318798	0.377461	0.421607	0.467154	0.502942	0.565822	0.650161	0.744141	0.817754	0.943084	1.03716	1.15247	1.2648	1.49515	1.85762	2.34007	3.10296	14.0514
0	0	0	0.0498779	0.0923796	0.137751	0.173921	0.214747	0.248047	0.262959	0.319316	0.378204	0.422182	0.468536	0.503404	0.56747	0.650228	0.744141	0.817785	0.943475	1.03821	1.15399	1.2648	1.4991	1.86668	2.34007	3.12239	14.2837
0	0	0	0.0498867	0.0924342	0.137987	0.174597	0.215109	0.248047	0.26308	0.31976	0.378466	0.42243	0.468749	0.505102	0.567648	0.650852	0.744141	0.824081	0.944106	1.03923	1.15521	1.2648	1.50101	1.88862	2.34007	3.12649	14.5166
0	0	0	0.0499648	0.0928747	0.13815	0.17514	0.215783	0.248047	0.263488	0.319849	0.37982	0.423113	0.469286	0.505432	0.568159	0.651179	0.744141	0.824136	0.944548	1.04186	1.15584	1.2648	1.5054	1.88907	2.34007	3.13171	14.6032
0	0	0	0.0503066	0.093493	0.138253	0.176333	0.215957	0.248047	0.263764	0.320905	0.380907	0.423568	0.469296	0.506004	0.568783	0.652184	0.744141	0.824731	0.945108	1.04362	1.15661	1.2648	1.50881	1.88907	2.34007	3.13284	14.6032
0	0	0	0.0505005	0.093704	0.138501	0.176789	0.216074	0.248047	0.26438	0.321531	0.381505	0.423719	0.470974	0.506841	0.569014	0.653905	0.744141	0.825336	0.947705	1.04464	1.15789	1.2648	1.50881	1.88907	2.34223	3.13757	14.6032
0	0	0	0.0510703	0.0940004	0.138528	0.177412	0.21652	0.248047	0.266123	0.322112	0.383811	0.425202	0.473493	0.506982	0.569221	0.656453	0.744141	0.827449	0.948823	1.04692	1.16091	1.2648	1.50881	1.9003	2.35318	3.14395	14.6032
0	0	0	0.0519427	0.0940458	0.139513	0.177871	0.217096	0.248047	0.268161	0.322212	0.383837	0.425634	0.47355	0.507111	0.569258	0.658612	0.744141	0.829237	0.949429	1.0471	1.16803	1.26543	1.51757	1.90415	2.35602	3.15712	14.9981
0	0	0	0.0526272	0.0941596	0.139572	0.17869	0.218354	0.248047	0.269222	0.322625	0.384747	0.425944	0.474296	0.507199	0.569486	0.660714	0.744141	0.829415	0.950048	1.04729	1.16805	1.26738	1.52383	1.90759	2.36404	3.15712	15.2302
0	0	0	0.0526356	0.0945853	0.139786	0.179207	0.218801	0.248047	0.270436	0.323472	0.384749	0.427908	0.474343	0.507297	0.56964	0.660998	0.744141	0.830906	0.952225	1.04969	1.16922	1.26926	1.52825	1.92326	2.36526	3.17655	15.3809
0	0	0	0.0527568	0.0949459	0.14062	0.179609	0.218876	0.248047	0.270477	0.323591	0.385216	0.428284	0.474464	0.507362	0.57191	0.661179	0.744141	0.837355	0.953414	1.05181	1.17105	1.27517	1.53414	1.92357	2.36612	3.17655	15.4388
0	0	0	0.0531828	0.0950396	0.140986	0.180902	0.220165	0.248047	0.271014	0.323904	0.38534	0.428487	0.476339	0.507494	0.571919	0.661208	0.744141	0.837961	0.953511	1.05237	1.17447	1.27818	1.53665	1.93671	2.37144	3.21095	15.8012
0	0	0	0.0534093	0.0952685	0.141433	0.18176	0.220473	0.248047	0.271034	0.324295	0.385367	0.428744	0.47657	0.507606	0.572115	0.661723	0.744141	0.839758	0.95396	1.05237	1.17582	1.28792	1.54203	1.93731	2.38312	3.21141	16.0389
0	0	0	0.0534253	0.0960791	0.141823	0.182414	0.220828	0.248047	0.271233	0.324583	0.385802	0.429013	0.478088	0.507953	0.572827	0.662919	0.744141	0.840043	0.954407	1.05237	1.17772	1.2906	1.54699	1.93731	2.41462	3.22461	16.4255
0	0	0	0.0534269	0.0964517	0.141833	0.18302	0.220981	0.248047	0.271249	0.32486	0.386474	0.429392	0.478828	0.508069	0.573074	0.663465	0.744372	0.841765	0.955709	1.05381	1.17788	1.29264	1.56228	1.93731	2.42342	3.22461	16.4423
0	0	0	0.0547068	0.0967339	0.141861	0.183591	0.222301	0.248047	0.272231	0.325097	0.387087	0.429806	0.479714	0.508209	0.578061	0.663691	0.744394	0.843811	0.956039	1.05408	1.18188	1.29413	1.56246	1.93731	2.42696	3.22461	16.621
0	0	0	0.0550206	0.0976871	0.141952	0.184044	0.222715	0.248047	0.272654	0.325502	0.387551	0.43008	0.480088	0.508331	0.578484	0.664529	0.744897	0.84645	0.959042	1.05541	1.18278	1.29909	1.56742	1.93731	2.44298	3.23414	17.2156
0	0	0	0.0554928	0.0982328	0.141999	0.186135	0.222728	0.248047	0.274218	0.325526	0.387785	0.43053	0.481088	0.508426	0.579444	0.664577	0.745997	0.846946	0.960391	1.06058	1.18618	1.30121	1.56879	1.93936	2.44298	3.23414	17.7505
0	0	0	0.0562833	0.0983443	0.142643	0.186165	0.223317	0.248047	0.274363	0.325869	0.388296	0.430787	0.48179	0.50893	0.580306	0.666803	0.74735	0.847451	0.964861	1.06298	1.18725	1.30383	1.56879	1.95729	2.46796	3.27877	18.3705
0	0	0	0.0563509	0.0988056	0.142663	0.186819	0.22371	0.248047	0.274397	0.327347	0.389042	0.431482	0.482575	0.508955	0.581415	0.666907	0.74738	0.848857	0.96588	1.0643	1.18849	1.30468	1.57102	1.97139	2.47782	3.2842	18.7156
0	0	0	0.0566547	0.0995085	0.143468	0.187201	0.223854	0.248047	0.274496	0.327745	0.389086	0.432287	0.482878	0.510005	0.581548	0.667951	0.748821	0.850632	0.969212	1.06473	1.19184	1.31006	1.57354	1.97781	2.48047	3.32325	19.204
0	0	0	0.0567297	0.0996779	0.143537	0.187282	0.224558	0.248047	0.275074	0.32785	0.389774	0.432477	0.483474	0.510715	0.581921	0.668258	0.751308	0.851244	0.972046	1.06544	1.19378	1.31045	1.57893	1.98438	2.48047	3.33713	21.1073
0	0	0	0.0569158	0.0999417	0.143544	0.187736	0.225213	0.248047	0.275332	0.328006	0.389783	0.434389	0.483545	0.51104	0.582781	0.668863	0.751862	0.851674	0.972224	1.06611	1.19949	1.31306	1.58775	1.98438	2.48047	3.33713	22.2317
0	0	0	0.0592583	0.100188	0.143634	0.18813	0.225833	0.248047	0.27566	0.32828	0.389853	0.434397	0.484887	0.511329	0.583936	0.669328	0.752156	0.852071	0.972299	1.0671	1.20272	1.31356	1.58827	1.98438	2.48047	3.33713	23.5736
0	0	0	0.0596398	0.100666	0.14396	0.189355	0.22617	0.248047	0.276208	0.328349	0.389999	0.437356	0.485078	0.51153	0.586088	0.671248	0.752341	0.852311	0.972638	1.06981	1.20712	1.31517	1.58827	1.98755	2.48047	3.33713	23.6946
0	0	0	0.0600106	0.100948	0.14433	0.190405	0.226352	0.248047	0.276933	0.328941	0.39013	0.437405	0.485608	0.512226	0.586504	0.671451	0.753036	0.853175	0.973147	1.07166	1.2174	1.31598	1.59179	1.99982	2.48656	3.33713	23.6946
0	0	0	0.0608762	0.10107	0.145192	0.190504	0.226464	0.248047	0.277672	0.329887	0.390154	0.437584	0.485644	0.512242	0.587335	0.672129	0.754386	0.854205	0.975002	1.07278	1.22322	1.31701	1.5962	1.99982	2.49284	3.34557	23.6946
0	0	0	0.0618289	0.10157	0.145289	0.191186	0.22653	0.248047	0.278203	0.329965	0.391346	0.437591	0.485987	0.512602	0.587369	0.672532	0.754877	0.855196	0.975224	1.07311	1.2289	1.31881	1.59902	1.99982	2.49284	3.39951	23.877
0	0	0	0.0621965	0.101584	0.145396	0.192199	0.226642	0.248047	0.278318	0.330329	0.392576	0.438098	0.486832	0.512707	0.588669	0.674334	0.755528	0.860282	0.975326	1.07411	1.23128	1.31989	1.60594	1.99982	2.49284	3.41637	24.0452
0	0	0	0.062284	0.101677	0.145403	0.192225	0.227267	0.248047	0.278376	0.330523	0.393105	0.438994	0.486911	0.512879	0.58937	0.675419	0.75685	0.860616	0.976241	1.07584	1.23229	1.32512	1.61683	1.99982	2.49284	3.45489	24.0452
0	0	0	0.0627916	0.102246	0.145595	0.192502	0.227627	0.248047	0.28053	0.332467	0.393128	0.439595	0.486976	0.512928	0.589415	0.675841	0.757229	0.861406	0.978358	1.0765	1.23353	1.32593	1.62028	1.99982	2.49385	3.45489	24.2452
0	0	0	0.0629516	0.102337	0.145864	0.193969	0.227761	0.248047	0.280772	0.332484	0.393517	0.440258	0.487167	0.512972	0.590144	0.677279	0.759387	0.861934	0.978755	1.07992	1.23378	1.33561	1.62063	1.99982	2.50741	3.4799	24.3099
0	0	0	0.063684	0.103572	0.146483	0.193973	0.228104	0.248047	0.281386	0.334648	0.393937	0.440336	0.487357	0.514467	0.590873	0.677822	0.759474	0.86219	0.979139	1.07995	1.23417	1.33577	1.62206	1.99982	2.50997	3.50791	24.7463
0	0	0	0.0640196	0.103777	0.146781	0.193973	0.22819	0.248047	0.282056	0.334825	0.39411	0.440676	0.487357	0.514602	0.591284	0.677867	0.760571	0.862976	0.980076	1.08297	1.23985	1.33577	1.62433	2.01613	2.51391	3.52541	25.1312
0	0	0	0.0643447	0.103967	0.146871	0.194259	0.228708	0.248047	0.282179	0.335139	0.394595	0.44084	0.48864	0.514753	0.593256	0.678318	0.761337	0.863648	0.981634	1.0845	1.24023	1.33695	1.62622	2.02799	2.51647	3.55149	25.7885
0	0	0	0.0643666	0.104392	0.147808	0.19444	0.228927	0.248047	0.282249	0.336395	0.395414	0.441361	0.48955	0.514909	0.593578	0.678736	0.762323	0.865472	0.986571	1.08453	1.24023	1.33837	1.62681	2.03083	2.51897	3.61162	26.4853
0	0	0	0.0659899	0.104876	0.147935	0.194868	0.229973	0.248047	0.282762	0.336421	0.395555	0.441965	0.489881	0.515112	0.595014	0.68025	0.762705	0.867069	0.986681	1.08544	1.24023	1.34368	1.62837	2.03452	2.5264	3.62564	27.078
0	0	0	0.0661286	0.104911	0.14794	0.195437	0.230023	0.248047	0.282947	0.337232	0.395559	0.442632	0.490446	0.51579	0.595963	0.681097	0.76365	0.867455	0.988096	1.08598	1.24023	1.34751	1.62934	2.03458	2.52959	3.67211	31.306
0	0	0	0.0663788	0.105047	0.149195	0.195466	0.231024	0.248047	0.282953	0.337719	0.396184	0.44272	0.49106	0.516135	0.596152	0.681153	0.764939	0.870971	0.988418	1.0862	1.24023	1.34923	1.64257	2.03477	2.52959	3.67984	31.7287
0	0	0	0.067019	0.105056	0.15	0.195747	0.231441	0.248047	0.284314	0.337745	0.397097	0.443191	0.493722	0.516814	0.596183	0.682071	0.765104	0.871486	0.98914	1.08669	1.24023	1.35298	1.64601	2.05992	2.52959	3.6849	32.1783
0	0	0	0.0673193	0.10522	0.150025	0.195772	0.232163	0.248047	0.284586	0.338152	0.397355	0.443442	0.495292	0.517957	0.596272	0.682316	0.765949	0.871757	0.990481	1.08776	1.24023	1.36876	1.64744	2.07633	2.52959	3.68748	33.5194
0	0	0.00563727	0.0676748	0.105513	0.150157	0.196419	0.232587	0.248047	0.284843	0.339118	0.397605	0.443798	0.495376	0.51897	0.596725	0.683179	0.766795	0.873146	0.992188	1.08901	1.24023	1.37308	1.64857	2.08477	2.52959	3.68748	34.0322
0	0	0.00588164	0.0679279	0.105731	0.151333	0.196735	0.232643	0.248047	0.286652	0.339302	0.397766	0.44392	0.496094	0.519464	0.597559	0.683302	0.766996	0.873199	0.992188	1.08946	1.24023	1.37347	1.6522	2.10189	2.52959	3.7029	34.1351
0	0	0.00972458	0.0679957	0.10594	0.151508	0.196913	0.232768	0.248047	0.287168	0.339518	0.397825	0.445664	0.496094	0.521091	0.598848	0.683955	0.768074	0.873957	0.992188	1.0913	1.24023	1.38152	1.65312	2.10475	2.52959	3.70465	34.2879
0	0	0.0104805	0.0680532	0.106483	0.151627	0.197384	0.233041	0.248047	0.288266	0.340004	0.398086	0.445704	0.496094	0.521413	0.599098	0.684262	0.768378	0.874808	0.992188	1.09299	1.24023	1.39001	1.65576	2.10525	2.55331	3.7207	34.4892
0	0	0.0112267	0.0683234	0.106566	0.151668	0.198263	0.233452	0.248047	0.29039	0.341126	0.398236	0.445716	0.496094	0.522047	0.599796	0.684319	0.76838	0.875224	0.992188	1.09329	1.24023	1.39621	1.66395	2.10656	2.5538	3.75363	35.2654
0	0	0.0126242	0.0687507	0.106747	0.151669	0.198281	0.233525	0.248047	0.290505	0.341527	0.398666	0.447278	0.496094	0.524068	0.600508	0.685473	0.768868	0.876486	0.992188	1.09741	1.24023	1.40043	1.66395	2.11011	2.5538	3.79439	35.9976
0	0	0.0126346	0.068834	0.106906	0.151868	0.198978	0.233537	0.248047	0.290686	0.343157	0.399504	0.448673	0.496094	0.524634	0.600969	0.687256	0.77045	0.880285	0.992188	1.09853	1.24023	1.40264	1.66609	2.1182	2.5538	3.79439	36.7243
0	0	0.012865	0.0694581	0.107015	0.151936	0.19905	0.234244	0.248047	0.290873	0.343597	0.400436	0.45021	0.496094	0.526653	0.60237	0.688573	0.77162	0.88069	0.992552	1.09955	1.24023	1.40315	1.68107	2.11931	2.5538	3.79439	37.7105
0	0	0.0139905	0.0697753	0.107489	0.15202	0.199299	0.234304	0.248047	0.291221	0.343741	0.400658	0.450231	0.496094	0.528002	0.602646	0.688828	0.773067	0.881088	0.993786	1.09955	1.24023	1.40317	1.69111	2.11931	2.5538	3.82039	38.6985
0	0	0.0150396	0.0697876	0.108715	0.153101	0.199382	0.23438	0.248047	0.291602	0.344039	0.400819	0.45025	0.496094	0.528885	0.603068	0.690671	0.773071	0.881152	0.995927	1.10127	1.24023	1.40317	1.69667	2.12395	2.55698	3.83936	39.6875
0	0	0.0178818	0.0701973	0.10948	0.154442	0.199887	0.23438	0.248047	0.291905	0.344049	0.401152	0.450382	0.496094	0.528999	0.603332	0.693619	0.773167	0.882001	0.997006	1.10221	1.24023	1.40317	1.71355	2.1267	2.56619	3.85072	39.7688
0	0	0.0187292	0.0708418	0.109898	0.155305	0.200067	0.235248	0.248047	0.292391	0.344109	0.401501	0.450483	0.496094	0.530036	0.603481	0.694746	0.774282	0.88382	0.997325	1.10234	1.24023	1.40551	1.71828	2.12695	2.57419	3.85072	42.4682
0	0	0.0193385	0.0709415	0.110009	0.155723	0.200376	0.235508	0.248047	0.292559	0.344205	0.402618	0.450649	0.496094	0.530235	0.60715	0.697174	0.775443	0.884341	0.99933	1.10311	1.24023	1.40613	1.7193	2.13378	2.58396	3.87323	43.797
0	0	0.0193747	0.0719568	0.11009	0.157138	0.200597	0.235676	0.248047	0.292886	0.344614	0.402639	0.450829	0.496094	0.531829	0.609003	0.697463	0.775473	0.884626	0.999892	1.10751	1.24023	1.41106	1.73633	2.13378	2.58969	3.90452	44.0414
0	0	0.0198825	0.0728464	0.11013	0.15797	0.201421	0.235855	0.248047	0.293312	0.345286	0.40322	0.451168	0.496094	0.532434	0.609093	0.698304	0.777034	0.88548	1.00004	1.10754	1.24023	1.41304	1.73772	2.13378	2.58969	3.91169	44.7977
0	0	0.0198825	0.0729903	0.110575	0.158356	0.202539	0.236125	0.248047	0.29372	0.346043	0.40329	0.451402	0.496094	0.532798	0.609707	0.698583	0.777566	0.886161	1.00086	1.10807	1.24023	1.42148	1.74186	2.13378	2.58969	3.92197	45.7759
0	0	0.0198825	0.0732625	0.110584	0.158405	0.202835	0.236502	0.248047	0.294485	0.347374	0.404382	0.452101	0.496094	0.53452	0.609713	0.699555	0.778754	0.888625	1.00353	1.10854	1.24023	1.42549	1.7515	2.13378	2.6073	3.92197	45.8947
0	0	0.0198825	0.0734263	0.110799	0.158545	0.202902	0.236659	0.248047	0.294706	0.348356	0.404393	0.45278	0.496094	0.534798	0.610744	0.701113	0.778766	0.888957	1.00454	1.1093	1.24023	1.42578	1.75311	2.13378	2.6164	3.927	45.9262
0	0	0.0199504	0.0742286	0.111712	0.158857	0.203107	0.236672	0.248047	0.295624	0.349262	0.404678	0.453105	0.496094	0.535037	0.61099	0.701125	0.780068	0.893225	1.00465	1.1093	1.24023	1.42828	1.75396	2.13378	2.61707	3.92785	48.9225
0	0	0.0201277	0.07446	0.111749	0.159471	0.204076	0.237662	0.248047	0.296314	0.350343	0.404743	0.453383	0.496094	0.535163	0.611108	0.701296	0.780126	0.894346	1.00513	1.1093	1.24023	1.43295	1.75396	2.13378	2.63677	3.99225	48.9935
0	0	0.0219048	0.0745632	0.111785	0.159508	0.204292	0.23972	0.248047	0.296684	0.350352	0.405071	0.453985	0.496094	0.535834	0.612247	0.701583	0.783045	0.894346	1.01196	1.1093	1.24023	1.43879	1.75396	2.13378	2.63677	4.00517	50.0471
0	0	0.0239095	0.0748904	0.112291	0.159736	0.204637	0.239845	0.248047	0.296922	0.350517	0.406358	0.454415	0.496094	0.535881	0.612769	0.701583	0.784393	0.894346	1.01212	1.11141	1.24023	1.4407	1.75396	2.13378	2.63677	4.01926	50.4268
0	0	0.0246782	0.0753561	0.112987	0.159751	0.205383	0.240098	0.248418	0.297242	0.350791	0.406408	0.45583	0.496094	0.537006	0.613884	0.702212	0.784393	0.894346	1.01413	1.11234	1.24023	1.4454	1.75396	2.13378	2.63677	4.02183	50.6678
0	0	0.0249284	0.0756476	0.113238	0.160064	0.206079	0.240265	0.249366	0.297363	0.350791	0.40645	0.455905	0.496094	0.537257	0.615641	0.702541	0.784393	0.894346	1.01459	1.11855	1.24023	1.44635	1.75396	2.13378	2.64008	4.03791	51.739
0	0	0.0255274	0.0756866	0.113377	0.160113	0.206173	0.241163	0.249903	0.297842	0.350791	0.407112	0.457859	0.496094	0.537704	0.615984	0.703396	0.784393	0.894434	1.01627	1.12108	1.24023	1.44635	1.75396	2.13378	2.65092	4.03791	51.8139
0	0	0.0264609	0.0757224	0.113889	0.160865	0.206239	0.242048	0.249908	0.297925	0.350791	0.407487	0.458412	0.496094	0.538287	0.616376	0.704482	0.784393	0.894436	1.01632	1.12331	1.24023	1.44635	1.75396	2.13627	2.65479	4.10591	52.2408
0	0	0.0286784	0.0762085	0.114016	0.161215	0.206494	0.24212	0.250253	0.297969	0.350791	0.407571	0.458677	0.496094	0.539713	0.617818	0.70604	0.784393	0.894967	1.01678	1.12527	1.24023	1.45438	1.75396	2.13759	2.65593	4.10751	53.6206
0	0	0.0291964	0.0764508	0.114476	0.161951	0.206865	0.24326	0.250545	0.298276	0.350791	0.408391	0.45883	0.496094	0.539744	0.618251	0.706044	0.784393	0.894977	1.01909	1.1287	1.24023	1.46324	1.75396	2.13814	2.65718	4.1146	54.0287
0	0	0.0299493	0.076619	0.114557	0.162687	0.206917	0.243276	0.251362	0.299304	0.350791	0.408505	0.459255	0.496094	0.540344	0.618272	0.708264	0.784393	0.895882	1.01962	1.13067	1.24185	1.46489	1.75396	2.14857	2.66647	4.11797	54.1629
0	0	0.0300139	0.076734	0.114636	0.162857	0.2075	0.24341	0.251713	0.299609	0.350791	0.408793	0.459436	0.496094	0.541552	0.618436	0.708621	0.787352	0.895897	1.02048	1.13102	1.24678	1.46641	1.75396	2.15097	2.67155	4.19284	54.621
0	0	0.0302671	0.077937	0.115256	0.16311	0.207904	0.24429	0.251886	0.299686	0.350791	0.410159	0.459711	0.496696	0.542064	0.618927	0.708645	0.787608	0.897106	1.02081	1.13172	1.24679	1.46963	1.75396	2.15134	2.67155	4.20887	54.9462
0	0	0.0304303	0.0780849	0.115538	0.163116	0.208133	0.244501	0.252345	0.300309	0.351773	0.41037	0.459727	0.498865	0.543056	0.619591	0.712098	0.78844	0.900458	1.02125	1.13288	1.24914	1.4737	1.75396	2.15467	2.67155	4.21119	55.435
0	0	0.0308908	0.0786309	0.116725	0.163192	0.20855	0.244656	0.252764	0.300631	0.354067	0.410752	0.460243	0.49958	0.543197	0.619651	0.713113	0.789878	0.903051	1.02216	1.1347	1.25087	1.47524	1.75964	2.15759	2.67155	4.2113	55.4722
0	0	0.0315022	0.0792045	0.116892	0.163514	0.208571	0.244922	0.252781	0.300849	0.354506	0.410926	0.460474	0.500285	0.543737	0.620873	0.713764	0.790857	0.903129	1.02272	1.13666	1.25449	1.4783	1.76646	2.15786	2.67155	4.2131	55.6073
0	0	0.0316124	0.079598	0.117629	0.163695	0.208982	0.245162	0.253147	0.301069	0.355185	0.410982	0.460593	0.500592	0.544862	0.621455	0.713799	0.792089	0.906522	1.02272	1.13948	1.25486	1.47972	1.7697	2.15925	2.68052	4.2291	55.8464
0	0	0.0323635	0.0796618	0.117706	0.163939	0.209042	0.245472	0.254219	0.301357	0.355423	0.411504	0.460594	0.500822	0.545691	0.623076	0.715093	0.792126	0.90709	1.02469	1.14086	1.25947	1.48828	1.77377	2.16835	2.68304	4.23188	56.5471
0	0	0.0326219	0.0800427	0.117889	0.16397	0.209087	0.245975	0.254866	0.301997	0.355516	0.412393	0.461128	0.501717	0.546849	0.623543	0.719625	0.793105	0.907394	1.0258	1.14709	1.26244	1.48828	1.77836	2.1701	2.70625	4.23321	57.3761
0	0	0.0326316	0.0801511	0.117913	0.164506	0.209096	0.24623	0.255743	0.302905	0.355676	0.412591	0.461167	0.503502	0.548161	0.623565	0.720509	0.793567	0.907467	1.02735	1.14825	1.2648	1.48828	1.78151	2.17418	2.71262	4.24469	57.6516
0	0	0.0330017	0.0802949	0.118271	0.164608	0.209468	0.24628	0.256633	0.303477	0.356354	0.413364	0.461313	0.503815	0.548891	0.623731	0.721052	0.796565	0.908897	1.0274	1.14989	1.2648	1.48832	1.78627	2.18309	2.7465	4.25328	58.5648
0	0	0.0331163	0.0809261	0.118293	0.164839	0.209767	0.247047	0.256702	0.303497	0.356441	0.413382	0.461809	0.504019	0.548928	0.623856	0.721445	0.796653	0.912317	1.03021	1.15176	1.2648	1.49023	1.78869	2.19682	2.75129	4.30843	59.0352
0	0	0.0341398	0.0811128	0.118516	0.164842	0.209871	0.247724	0.257367	0.304047	0.356443	0.413542	0.461972	0.507401	0.549168	0.624081	0.721494	0.797786	0.916823	1.0327	1.15236	1.2648	1.49439	1.78869	2.20217	2.75516	4.31947	59.1398
0	0	0.0343016	0.0812513	0.119112	0.165054	0.210355	0.247943	0.257434	0.304389	0.35654	0.414128	0.462298	0.508564	0.549268	0.624821	0.723551	0.798389	0.917448	1.03274	1.15305	1.2648	1.49551	1.78869	2.20313	2.77325	4.32495	59.8045
0	0	0.0344787	0.0813375	0.119142	0.165613	0.210558	0.248047	0.258259	0.30542	0.356937	0.414291	0.462609	0.508946	0.549319	0.625601	0.724436	0.80075	0.920244	1.03308	1.15575	1.2648	1.49974	1.78869	2.20852	2.77325	4.33195	59.8415
0	0	0.0346223	0.0816862	0.119553	0.165908	0.211245	0.248047	0.259062	0.306065	0.357983	0.414544	0.462701	0.509125	0.552406	0.630109	0.725664	0.800755	0.92028	1.03358	1.15725	1.2648	1.50881	1.79453	2.21135	2.77325	4.33829	61.2952
0	0	0.0350111	0.0818754	0.120628	0.165941	0.211282	0.248047	0.259717	0.306191	0.358383	0.414835	0.462897	0.509268	0.552416	0.631974	0.726712	0.800882	0.920339	1.03599	1.1623	1.2648	1.50881	1.79852	2.2186	2.77325	4.37607	63.2909
0	0	0.0358402	0.0819108	0.120695	0.166351	0.211571	0.248047	0.260473	0.306505	0.359135	0.414936	0.464897	0.509657	0.554419	0.634456	0.726878	0.801392	0.923601	1.03705	1.16746	1.2648	1.50881	1.79854	2.2186	2.77325	4.38194	65.2707
0	0	0.0363073	0.0832275	0.120767	0.166737	0.211627	0.248047	0.260608	0.30656	0.359664	0.415054	0.465764	0.510612	0.55465	0.634782	0.727114	0.80167	0.924458	1.03765	1.17028	1.2648	1.50881	1.80166	2.2203	2.77325	4.4217	67.2248
0	0	0.0370631	0.0834965	0.121503	0.166762	0.211802	0.248047	0.260927	0.306975	0.361949	0.415105	0.465869	0.510917	0.55465	0.634946	0.727841	0.801677	0.92651	1.04163	1.17332	1.26503	1.50881	1.80581	2.23113	2.77325	4.42386	69.0841
0	0	0.0375547	0.08359	0.12177	0.167177	0.212805	0.248047	0.261654	0.308621	0.362191	0.415271	0.465898	0.511117	0.55465	0.63538	0.727903	0.802364	0.930403	1.04354	1.17593	1.26902	1.52269	1.80931	2.23196	2.77325	4.47173	69.1659
0	0	0.0380518	0.0836096	0.121801	0.167537	0.212867	0.248047	0.261795	0.308984	0.362611	0.415436	0.465911	0.511565	0.55465	0.635594	0.730184	0.802552	0.933233	1.04416	1.17798	1.27168	1.53017	1.80941	2.23242	2.77325	4.47173	70.8373
0	0	0.0381787	0.0838168	0.122431	0.167736	0.212889	0.248047	0.261811	0.309007	0.363117	0.415631	0.466464	0.511623	0.55465	0.636542	0.730321	0.803772	0.935538	1.04751	1.17883	1.27233	1.54304	1.81083	2.23242	2.77325	4.47173	71.7645
0	0	0.0391541	0.0847047	0.122496	0.168243	0.213808	0.248047	0.261927	0.309415	0.364429	0.415662	0.466577	0.511751	0.55465	0.636717	0.730911	0.805311	0.937369	1.04818	1.18051	1.27266	1.54371	1.82186	2.23503	2.77325	4.47173	74.5239
0	0	0.039417	0.084809	0.122623	0.168285	0.214021	0.248047	0.261929	0.309663	0.365235	0.415855	0.468654	0.511769	0.55465	0.636911	0.731209	0.80535	0.93934	1.04833	1.18227	1.27656	1.55312	1.83785	2.23808	2.77325	4.48165	75.6571
0	0	0.0397574	0.0853466	0.123084	0.16862	0.214344	0.248047	0.262214	0.309953	0.365934	0.415914	0.469834	0.512254	0.55465	0.638204	0.731642	0.805409	0.940372	1.04834	1.1827	1.27958	1.55569	1.84112	2.24542	2.77325	4.50627	75.8168
0	0	0.0397649	0.0859468	0.123384	0.168807	0.214728	0.248047	0.262265	0.310698	0.366488	0.416133	0.470072	0.512281	0.55465	0.638417	0.732008	0.805929	0.94184	1.04872	1.18289	1.28039	1.55849	1.84482	2.24616	2.7838	4.51716	75.9372
0	0	0.0403038	0.0864957	0.123956	0.168857	0.214804	0.248047	0.263018	0.31143	0.366608	0.417704	0.470878	0.512382	0.55465	0.64005	0.733746	0.806869	0.942712	1.04949	1.18517	1.28412	1.55939	1.85523	2.24616	2.79422	4.53004	78.7681
0	0	0.0404556	0.0865716	0.123993	0.16915	0.214841	0.248047	0.263075	0.311739	0.367576	0.417838	0.471038	0.513898	0.555323	0.641218	0.733816	0.807309	0.944016	1.05177	1.18714	1.28455	1.56697	1.86089	2.24867	2.79489	4.53304	79.8715
0	0	0.0409505	0.0866981	0.124036	0.169318	0.215109	0.248047	0.263312	0.312029	0.369128	0.418646	0.47216	0.513954	0.555626	0.642233	0.734928	0.807542	0.946067	1.05237	1.18783	1.30013	1.56856	1.88823	2.2514	2.79577	4.54572	80.548
0	0	0.0411124	0.0872082	0.124112	0.169346	0.215544	0.248047	0.263923	0.312046	0.369671	0.418712	0.474626	0.514197	0.557719	0.642388	0.73589	0.807864	0.950338	1.05237	1.19299	1.30516	1.56879	1.88907	2.25642	2.79704	4.56029
0	0	0.0415338	0.0872583	0.124198	0.169848	0.216507	0.248047	0.264782	0.312407	0.370256	0.419953	0.475332	0.515507	0.559886	0.644333	0.736737	0.812368	0.951133	1.05237	1.19301	1.30635	1.56879	1.88907	2.25781	2.79716	4.57376
0	0	0.0415987	0.0879811	0.12446	0.1703	0.216866	0.248047	0.265421	0.312619	0.37027	0.420694	0.475868	0.516662	0.560895	0.645243	0.740128	0.812523	0.952442	1.05237	1.1952	1.30639	1.56879	1.88907	2.26755	2.80257	4.58685
0	0	0.0418535	0.0881256	0.124569	0.170769	0.216954	0.248047	0.26716	0.312846	0.370599	0.420983	0.476243	0.516831	0.562955	0.647183	0.74246	0.813126	0.953079	1.05237	1.19597	1.30978	1.56879	1.88907	2.28333	2.80625	4.62672
0	0	0.0422467	0.0882145	0.124583	0.171005	0.217468	0.248047	0.267337	0.313442	0.371658	0.421571	0.476619	0.517655	0.564163	0.647546	0.743753	0.814089	0.95419	1.05237	1.19609	1.31232	1.56983	1.8956	2.2843	2.80633	4.65242
0	0	0.0434587	0.0892249	0.124884	0.17168	0.217551	0.248047	0.267744	0.314083	0.371782	0.421881	0.477416	0.518504	0.565173	0.649578	0.744141	0.815217	0.954499	1.05267	1.20443	1.31294	1.57729	1.89657	2.28688	2.82344	4.65251
0	0	0.0434622	0.0893039	0.124897	0.172137	0.217564	0.248047	0.268326	0.314567	0.372499	0.422327	0.477613	0.518653	0.565718	0.649945	0.744141	0.815237	0.955643	1.05325	1.20557	1.31472	1.58099	1.89831	2.28688	2.82817	4.68014
0	0	0.0442199	0.0893985	0.125009	0.172175	0.217781	0.248047	0.268372	0.316284	0.372636	0.422624	0.478023	0.519014	0.566547	0.650488	0.744141	0.816299	0.955823	1.05412	1.21004	1.3148	1.58204	1.9053	2.30074	2.8446	4.78763
0	0	0.0454625	0.0898229	0.125262	0.172377	0.217913	0.248047	0.269057	0.31655	0.373508	0.423509	0.479151	0.519082	0.568211	0.651565	0.744141	0.816359	0.959064	1.05853	1.21234	1.3175	1.58802	1.91596	2.34007	2.84579	4.80035
0	0	0.045522	0.0900585	0.125671	0.17273	0.21798	0.248047	0.2694	0.3172	0.373723	0.423879	0.479281	0.520914	0.568325	0.652167	0.744141	0.819257	0.961271	1.05997	1.21435	1.32609	1.58827	1.935	2.34007	2.86791	4.8344
0	0	0.0456489	0.0905456	0.125945	0.173065	0.218083	0.248047	0.270912	0.317467	0.374174	0.424168	0.479784	0.522777	0.570194	0.652722	0.744141	0.821364	0.961883	1.06216	1.21482	1.32851	1.58827	1.93731	2.34007	2.89231	4.87091
0	0	0.0460449	0.091115	0.12597	0.174098	0.21838	0.248047	0.270953	0.317801	0.374311	0.424894	0.480327	0.523334	0.570773	0.65276	0.744141	0.821481	0.962084	1.0626	1.21581	1.32911	1.58827	1.93731	2.34007	2.8927	4.88294
0	0	0.0462662	0.0911586	0.126999	0.174162	0.218444	0.248047	0.271397	0.318176	0.374898	0.425897	0.481505	0.523497	0.572442	0.654059	0.744141	0.822852	0.962181	1.06315	1.22147	1.33318	1.58827	1.93731	2.34007	2.8927	4.88547
0	0	0.0463849	0.0912234	0.127041	0.174262	0.218569	0.248047	0.272313	0.318507	0.375181	0.425918	0.481596	0.52471	0.573618	0.656196	0.744141	0.825016	0.964665	1.06345	1.22156	1.33463	1.58827	1.93731	2.34007	2.8927	4.89225
0	0	0.0467767	0.0914424	0.127135	0.1747	0.220447	0.248047	0.27245	0.318951	0.37544	0.426022	0.481854	0.524822	0.573956	0.657261	0.744141	0.828125	0.965067	1.06446	1.22202	1.33511	1.58827	1.93731	2.34007	2.89789	4.89225
0	0	0.0471252	0.0917924	0.127289	0.174846	0.220978	0.248047	0.27331	0.319102	0.375477	0.426232	0.482364	0.524938	0.574261	0.659305	0.744141	0.82891	0.965196	1.06521	1.22225	1.33577	1.58827	1.93731	2.34007	2.9168	4.93165
0	0	0.0472228	0.0924122	0.127471	0.174931	0.222176	0.248047	0.273384	0.319803	0.375498	0.426577	0.482367	0.52567	0.574872	0.660089	0.744141	0.829144	0.965654	1.0676	1.22486	1.33577	1.58827	1.93731	2.34007	2.92896	4.95756
0	0	0.0472531	0.0928949	0.127582	0.175049	0.222195	0.248047	0.273454	0.320421	0.376109	0.427407	0.482585	0.526015	0.576372	0.661289	0.744141	0.830105	0.966717	1.07102	1.22876	1.33577	1.58827	1.93731	2.34007	2.9335	4.96243
0	0	0.0482859	0.0931941	0.128232	0.175076	0.222757	0.248047	0.274503	0.32229	0.376148	0.42768	0.483075	0.526376	0.576473	0.662369	0.744141	0.830465	0.966722	1.07199	1.23172	1.33577	1.59597	1.93731	2.34007	2.96599	4.96312
0	0	0.0493652	0.0935936	0.128311	0.175183	0.2229	0.248047	0.27464	0.323464	0.376658	0.427928	0.484232	0.527047	0.577775	0.662548	0.745105	0.830729	0.967418	1.07271	1.23379	1.33577	1.59765	1.93731	2.34007	2.97221	5.0017
0	0	0.049402	0.0938641	0.128361	0.175481	0.223904	0.248047	0.274673	0.323678	0.37693	0.428201	0.485372	0.52769	0.578291	0.6629	0.746295	0.833624	0.968002	1.07361	1.24023	1.34149	1.59813	1.94549	2.35318	2.97656	5.02352
0	0	0.0494967	0.0938841	0.128921	0.175625	0.22441	0.248047	0.274729	0.323713	0.377383	0.428487	0.486277	0.528997	0.578831	0.664659	0.747642	0.836983	0.970913	1.07367	1.24023	1.34285	1.60072	1.9552	2.35318	2.98244	5.03408
0	0	0.0495742	0.0940308	0.128945	0.175891	0.224593	0.248047	0.274851	0.324662	0.379133	0.429385	0.486456	0.529587	0.580306	0.665022	0.749726	0.839192	0.97216	1.07391	1.24023	1.3429	1.6095	1.96321	2.35318	2.98479	5.05918
0	0	0.0503005	0.0946826	0.129134	0.176929	0.224778	0.248047	0.274872	0.325694	0.38035	0.429765	0.488188	0.530565	0.585408	0.66627	0.75043	0.839379	0.974033	1.07874	1.24023	1.34773	1.61428	1.96413	2.36884	2.98688	5.07744
0	0	0.0506893	0.0947043	0.129478	0.177414	0.225042	0.248047	0.274981	0.32642	0.380992	0.429932	0.489097	0.530849	0.585889	0.669198	0.753273	0.841458	0.97524	1.0803	1.24023	1.3497	1.62209	1.96666	2.37559	2.98688	5.1076
0	0	0.0509616	0.0949359	0.129512	0.177498	0.225105	0.248047	0.275037	0.326919	0.38138	0.430061	0.489468	0.531655	0.58621	0.669812	0.753484	0.843104	0.977646	1.08237	1.24023	1.35115	1.62486	1.96893	2.38149	2.98688	5.1076
0	0	0.0511574	0.0953866	0.129536	0.177518	0.225857	0.248047	0.275564	0.327007	0.381909	0.430118	0.489597	0.532012	0.588754	0.670235	0.754436	0.843252	0.979907	1.08279	1.24023	1.35346	1.62701	1.97875	2.3881	2.99448	5.1076
0	0	0.0513607	0.0954488	0.129648	0.177717	0.225986	0.248047	0.275737	0.327664	0.383788	0.43031	0.490182	0.532549	0.588768	0.670862	0.75463	0.844585	0.980542	1.09232	1.24023	1.36438	1.62952	1.98234	2.39885	2.99716	5.1601
0	0	0.0515307	0.0955396	0.12965	0.177851	0.226637	0.248047	0.276505	0.328755	0.383827	0.430865	0.490751	0.534042	0.589593	0.671992	0.757243	0.844972	0.981749	1.09645	1.24023	1.36977	1.63796	1.98438	2.40919	2.99716	5.16511
0	0	0.0515937	0.0958278	0.129691	0.178067	0.226819	0.248047	0.276528	0.329145	0.384079	0.431029	0.492068	0.534133	0.5903	0.673336	0.757458	0.845061	0.982727	1.09667	1.24023	1.372	1.64255	1.98438	2.41574	2.99716	5.23666
0	0	0.0518129	0.095857	0.129925	0.178168	0.22723	0.248047	0.277172	0.330043	0.384609	0.431362	0.492096	0.534702	0.590435	0.67367	0.759333	0.845522	0.984018	1.09853	1.24023	1.38072	1.64452	1.98438	2.42914	2.99716	5.27571
0	0	0.0519482	0.0959804	0.129932	0.179606	0.227601	0.248047	0.2775	0.330334	0.385118	0.432522	0.492336	0.534931	0.590508	0.674315	0.760432	0.84951	0.984228	1.1002	1.24023	1.38196	1.64821	1.98441	2.43273	2.99716	5.28618
0	0	0.052051	0.0962423	0.130639	0.180028	0.228062	0.248047	0.278157	0.331303	0.385867	0.432633	0.492919	0.534942	0.591192	0.675724	0.762545	0.850001	0.986174	1.10134	1.24023	1.3844	1.6488	1.99282	2.43401	2.99716	5.29368
0	0	0.0520817	0.0964174	0.13081	0.18006	0.22822	0.248047	0.278236	0.331539	0.386039	0.432651	0.494166	0.535544	0.593332	0.67573	0.763885	0.85321	0.987251	1.10155	1.24023	1.38573	1.65062	1.99352	2.4358	3.01428	5.3089
0	0	0.0520904	0.0966785	0.131243	0.180106	0.228296	0.248047	0.278576	0.33237	0.386323	0.433522	0.494535	0.536862	0.593987	0.676513	0.766117	0.856205	0.987719	1.10185	1.24023	1.38667	1.65579	1.99578	2.44298	3.01762	5.43915
0	0	0.0528372	0.096778	0.131245	0.180984	0.228734	0.248047	0.279099	0.332586	0.386378	0.434382	0.495266	0.537704	0.595294	0.677806	0.766321	0.857005	0.988885	1.10711	1.24023	1.39575	1.65604	1.99982	2.44597	3.0278	5.50753
0	0	0.0528557	0.0971946	0.131337	0.181567	0.229273	0.248047	0.27913	0.333502	0.38822	0.434537	0.49533	0.538819	0.596152	0.678077	0.767301	0.858556	0.99105	1.10835	1.24023	1.3968	1.66376	1.99982	2.44971	3.0278	5.52012
0	0	0.0528708	0.0972588	0.131733	0.181603	0.229585	0.248047	0.279698	0.333529	0.388236	0.434676	0.49543	0.538995	0.597696	0.679613	0.768258	0.862488	0.992188	1.10881	1.24023	1.39914	1.66395	1.99982	2.45335	3.0278	5.52783
0	0	0.0538467	0.0977459	0.132428	0.181604	0.229706	0.248047	0.280185	0.335075	0.388852	0.435186	0.495449	0.539007	0.598855	0.681901	0.769803	0.866705	0.992188	1.1093	1.24023	1.40317	1.66395	1.99982	2.4568	3.0278	5.56097
0	0	0.0540002	0.0979432	0.132748	0.183528	0.229854	0.248047	0.280513	0.335195	0.389159	0.435301	0.49584	0.539083	0.599796	0.682995	0.770022	0.866996	0.992188	1.1093	1.24023	1.40317	1.66563	1.99982	2.46327	3.03433	5.69374
0	0	0.0543082	0.0982536	0.133276	0.183821	0.229956	0.248047	0.280704	0.337042	0.389238	0.435673	0.495937	0.539291	0.599901	0.683792	0.770386	0.868852	0.992188	1.1093	1.24023	1.40317	1.67703	1.99982	2.46666	3.03661	5.76942
0	0	0.0544005	0.0983984	0.13334	0.183939	0.229996	0.248047	0.280944	0.337183	0.389298	0.436231	0.496094	0.539765	0.60128	0.684322	0.771969	0.870473	0.992188	1.1101	1.24023	1.40317	1.67794	1.99982	2.47038	3.06676	5.97376
0	0	0.0548033	0.0987604	0.133675	0.184	0.230231	0.248047	0.280995	0.337486	0.389455	0.436961	0.496094	0.539807	0.601607	0.684719	0.77453	0.872452	0.992188	1.11049	1.24023	1.40317	1.68458	1.99982	2.48047	3.077	6.16136
0	0	0.0554429	0.0988587	0.13383	0.184057	0.23064	0.248047	0.28125	0.337688	0.390161	0.437217	0.496094	0.539857	0.603027	0.684934	0.777137	0.872702	0.992188	1.11124	1.24023	1.40583	1.68692	1.99982	2.48047	3.08934	6.32774
0	0	0.0556228	0.0990997	0.134132	0.184685	0.230846	0.248047	0.28127	0.337868	0.391817	0.437591	0.496094	0.540812	0.603134	0.685726	0.778393	0.874685	0.992188	1.11251	1.24023	1.4098	1.68778	2.00731	2.48047	3.0984	6.33283
0	0	0.0557595	0.0992764	0.134151	0.184816	0.231328	0.248047	0.282167	0.33923	0.391934	0.437628	0.496094	0.5424	0.603275	0.688786	0.778955	0.874939	0.992188	1.11513	1.24023	1.41031	1.68793	2.01205	2.48047	3.11225	6.37064
0	0	0.0560306	0.0997476	0.13428	0.185198	0.231612	0.248047	0.283468	0.339359	0.392197	0.437661	0.496094	0.543165	0.604439	0.690072	0.779766	0.875056	0.992188	1.11617	1.24023	1.41186	1.69197	2.01602	2.48047	3.11564	6.44553
0	0	0.0562473	0.0998844	0.134457	0.185211	0.231815	0.248047	0.283875	0.33957	0.392474	0.438231	0.496094	0.543782	0.604503	0.690945	0.780809	0.875973	0.992188	1.11996	1.24023	1.41327	1.70428	2.01951	2.48047	3.11605	6.45782
0	0	0.0569131	0.0999509	0.134615	0.185582	0.232395	0.248047	0.283965	0.340978	0.39253	0.438303	0.496094	0.544322	0.606024	0.693807	0.781874	0.877995	0.992188	1.12149	1.24023	1.41504	1.70562	2.0309	2.48047	3.13757	6.52122
0	0	0.0570337	0.100192	0.134935	0.185861	0.232555	0.248047	0.284329	0.341262	0.392697	0.439332	0.496094	0.546703	0.60647	0.69567	0.783955	0.878297	0.993127	1.12208	1.24023	1.42175	1.71016	2.03117	2.48047	3.15712	6.7624
0	0	0.05715	0.100492	0.135463	0.186176	0.232582	0.248047	0.284339	0.341415	0.39295	0.439398	0.496094	0.546906	0.607327	0.696699	0.784393	0.879466	0.993355	1.12214	1.24023	1.42503	1.71438	2.03278	2.48047	3.15712	6.84268
0	0	0.0571657	0.100737	0.13585	0.186341	0.232718	0.248047	0.285185	0.342569	0.39321	0.439675	0.496094	0.547538	0.60771	0.697146	0.784393	0.880079	0.994593	1.12401	1.24023	1.42518	1.72058	2.04225	2.48405	3.15712	6.9237
0	0	0.0573981	0.100783	0.135916	0.186487	0.232791	0.248047	0.285362	0.342713	0.393517	0.440287	0.496094	0.547548	0.610207	0.699912	0.784393	0.880265	0.994703	1.1252	1.24023	1.42795	1.72578	2.04474	2.4892	3.15712	7.01583
0	0	0.0574839	0.101006	0.136332	0.186751	0.233265	0.248047	0.28554	0.343566	0.393741	0.440522	0.496094	0.547967	0.610364	0.701361	0.784393	0.880984	0.995871	1.1262	1.24023	1.43101	1.72712	2.04545	2.49284	3.16441	7.01583
0	0	0.0574979	0.10107	0.136986	0.187575	0.2333	0.248047	0.285701	0.344004	0.393842	0.440659	0.496094	0.548875	0.610683	0.701583	0.784393	0.882014	0.99763	1.12633	1.24023	1.43108	1.73633	2.04545	2.49284	3.17559	7.15171
0	0	0.0576042	0.101271	0.136994	0.188477	0.233462	0.248047	0.28604	0.34452	0.394179	0.441059	0.496094	0.549572	0.610795	0.701583	0.784393	0.883343	0.999058	1.12875	1.24023	1.43473	1.73633	2.04545	2.49284	3.17655	7.19336
0	0	0.0578588	0.101675	0.137014	0.188516	0.233682	0.248047	0.286833	0.346945	0.39421	0.441594	0.496094	0.552198	0.611591	0.701583	0.784393	0.883344	0.99942	1.12963	1.24023	1.44254	1.73633	2.04545	2.49284	3.17655	7.32101
0	0	0.0580157	0.101689	0.137066	0.188858	0.234514	0.248047	0.287684	0.347884	0.394467	0.44189	0.496094	0.554056	0.611649	0.701583	0.784393	0.885931	0.999957	1.13088	1.24023	1.44464	1.73633	2.04558	2.49284	3.17655	7.32894
0	0	0.0581802	0.1018	0.137145	0.188992	0.235403	0.248047	0.287843	0.348191	0.394757	0.442317	0.496094	0.55465	0.611881	0.705028	0.784393	0.890115	1.00109	1.13124	1.24023	1.44512	1.73837	2.04773	2.49284	3.19223	7.37496
0	0	0.058346	0.10183	0.137439	0.189107	0.236054	0.248047	0.288198	0.348701	0.39506	0.442685	0.496094	0.55465	0.613637	0.707897	0.784538	0.892335	1.00139	1.13218	1.24023	1.44635	1.74219	2.04916	2.49613	3.20576	7.45792
0	0	0.0584962	0.101962	0.138045	0.189385	0.236142	0.248047	0.288704	0.349279	0.395194	0.442735	0.496094	0.55465	0.61597	0.710711	0.784848	0.893245	1.0021	1.13464	1.24023	1.44635	1.74678	2.0539	2.50335	3.21016	7.56035
0	0	0.0585228	0.101978	0.138639	0.189746	0.236667	0.248047	0.288914	0.349602	0.396853	0.443169	0.496094	0.55465	0.621119	0.710926	0.786061	0.894346	1.00421	1.13618	1.24023	1.44635	1.7475	2.05407	2.5051	3.22461	7.56035
0	0	0.058658	0.102253	0.138737	0.189764	0.237425	0.248047	0.289276	0.350184	0.397623	0.4433	0.496094	0.55465	0.621774	0.711336	0.786063	0.894346	1.00629	1.13853	1.24023	1.44635	1.74765	2.0566	2.51029	3.22461	7.56035
0	0	0.0587575	0.102379	0.139257	0.189884	0.23806	0.248047	0.289532	0.35033	0.397765	0.443475	0.496094	0.55465	0.622478	0.711529	0.78702	0.894346	1.00739	1.14009	1.24072	1.44635	1.74952	2.06088	2.51082	3.23414	7.82361
0	0	0.0588002	0.102523	0.139345	0.190327	0.238341	0.248047	0.291771	0.350791	0.39827	0.443984	0.496094	0.55465	0.622544	0.711848	0.788241	0.894346	1.0077	1.14071	1.2422	1.44635	1.75021	2.06337	2.51234	3.26255	8.27403
0	0	0.0589614	0.102544	0.139373	0.19046	0.23835	0.248047	0.291947	0.350791	0.398276	0.443985	0.496094	0.55465	0.622826	0.71238	0.788376	0.894346	1.00833	1.14139	1.24648	1.44929	1.75147	2.06563	2.51912	3.26255	8.31975
0	0	0.0589614	0.10259	0.139917	0.190582	0.238688	0.248047	0.291959	0.350791	0.399034	0.444237	0.496094	0.55465	0.623161	0.713953	0.789073	0.894346	1.01085	1.14393	1.24796	1.45389	1.75177	2.06804	2.52153	3.27008	8.31975
0	0	0.0591083	0.102923	0.140449	0.190776	0.238846	0.248047	0.292499	0.350791	0.400142	0.444897	0.496094	0.555431	0.623326	0.713997	0.789335	0.89699	1.01188	1.14606	1.25601	1.45738	1.75201	2.07596	2.52154	3.2834	8.54233
0	0	0.0592279	0.103408	0.140542	0.190819	0.238855	0.248047	0.292795	0.350791	0.400784	0.44498	0.496094	0.555447	0.624056	0.715956	0.789641	0.897514	1.012	1.14642	1.2646	1.46052	1.75396	2.07701	2.52959	3.30936	8.76627
0	0	0.0597839	0.103821	0.141291	0.190913	0.239475	0.248047	0.292817	0.350791	0.402353	0.445023	0.496094	0.555495	0.62411	0.715991	0.790696	0.897647	1.01716	1.15135	1.2648	1.47331	1.75396	2.07957	2.52959	3.32574	8.86076
0	0	0.0600074	0.105003	0.141484	0.191299	0.239646	0.248047	0.293633	0.350791	0.402362	0.445351	0.497266	0.55552	0.625617	0.716626	0.792067	0.897777	1.019	1.15219	1.2648	1.47406	1.75396	2.08903	2.52959	3.33713	9.21787
0	0	0.0609845	0.105029	0.141555	0.191374	0.239989	0.248047	0.295074	0.350791	0.402545	0.445498	0.497413	0.556378	0.626254	0.717056	0.793936	0.898402	1.01917	1.15247	1.2648	1.47715	1.75396	2.09037	2.52959	3.33713	9.26115
0	0	0.0610338	0.105051	0.142084	0.191522	0.240267	0.248047	0.295078	0.350791	0.402608	0.447042	0.497567	0.556719	0.626727	0.719027	0.794311	0.900109	1.02045	1.15587	1.2648	1.47929	1.75396	2.09117	2.52959	3.39738	9.64835
0	0	0.061065	0.105401	0.142235	0.192676	0.240275	0.248047	0.296038	0.350791	0.40335	0.447398	0.497908	0.558242	0.627202	0.72024	0.795851	0.900334	1.0211	1.15689	1.2648	1.48014	1.75396	2.09501	2.52959	3.45489	9.67383
0	0	0.0611757	0.10549	0.142336	0.193103	0.24031	0.248047	0.296594	0.350791	0.403687	0.448238	0.498471	0.558791	0.627701	0.721032	0.796214	0.900656	1.02204	1.1576	1.2648	1.48059	1.75396	2.09604	2.52959	3.45489	10.1336
0	0	0.0619414	0.105839	0.142625	0.19354	0.240804	0.248047	0.296732	0.350791	0.404274	0.448255	0.49879	0.559137	0.628552	0.721075	0.796619	0.901799	1.0222	1.16107	1.2648	1.48795	1.75396	2.09748	2.52959	3.46301	10.5529
0	0	0.0620381	0.10594	0.14266	0.193674	0.241106	0.248047	0.296964	0.350791	0.404294	0.449377	0.499496	0.559376	0.630768	0.721277	0.798035	0.903094	1.02241	1.164	1.2648	1.48828	1.75396	2.10347	2.53349	3.50791	10.5966
0	0	0.0625504	0.106119	0.143448	0.193973	0.241261	0.248047	0.297025	0.350791	0.404328	0.449399	0.500193	0.560442	0.630828	0.725014	0.798729	0.905951	1.02249	1.16693	1.2648	1.48828	1.75396	2.10486	2.54237	3.50791	11.2963
0	0	0.0625671	0.106156	0.14348	0.194254	0.24152	0.248047	0.297075	0.350791	0.404407	0.449399	0.500592	0.561008	0.631609	0.725657	0.798832	0.905965	1.0227	1.16797	1.2699	1.48828	1.75396	2.10669	2.54925	3.52541	11.4532
0	0	0.0625673	0.106641	0.143861	0.194743	0.24159	0.248047	0.298131	0.350791	0.404508	0.450879	0.503024	0.561656	0.632252	0.725761	0.800108	0.907604	1.02272	1.1732	1.27406	1.48828	1.75396	2.10953	2.5505	3.55149	11.5095
0	0	0.0627291	0.106646	0.143969	0.19482	0.242051	0.248047	0.298161	0.350791	0.405134	0.451033	0.503147	0.562711	0.634031	0.727784	0.801789	0.908743	1.02272	1.17507	1.27675	1.48828	1.75396	2.1104	2.5517	3.55149	13.2676
0	0	0.0627952	0.107217	0.144099	0.194888	0.242205	0.248047	0.298777	0.350791	0.405351	0.45167	0.503154	0.563132	0.634659	0.728376	0.802475	0.909202	1.02272	1.17935	1.27727	1.48828	1.75396	2.11931	2.55175	3.55149	13.4998
0	0	0.06334	0.107289	0.144838	0.195116	0.242403	0.248047	0.298785	0.350791	0.405925	0.45174	0.50344	0.56327	0.634972	0.728503	0.803168	0.912238	1.02272	1.18004	1.28004	1.48828	1.75396	2.11931	2.5538	3.55885	13.5543
0	0	0.0635001	0.107931	0.146095	0.195216	0.243478	0.248047	0.299369	0.351214	0.406378	0.452333	0.5037	0.564622	0.635883	0.728682	0.803819	0.912282	1.02314	1.18006	1.2809	1.48828	1.75396	2.11931	2.5538	3.56632	13.8196
0	0	0.0635757	0.108013	0.146248	0.195907	0.244026	0.248047	0.299579	0.351578	0.406404	0.452367	0.503808	0.565488	0.636144	0.729333	0.804121	0.912485	1.02372	1.18208	1.28277	1.48871	1.75396	2.11931	2.5538	3.61162	14.0404
0	0	0.0639602	0.108636	0.1466	0.195936	0.244673	0.248047	0.299907	0.352997	0.406863	0.452773	0.504047	0.565654	0.636963	0.731871	0.804729	0.913857	1.02422	1.18402	1.29947	1.4906	1.75396	2.13296	2.5538	3.61162	14.1408
0	0	0.0641061	0.10894	0.146614	0.196784	0.24504	0.248047	0.301129	0.353755	0.40756	0.453166	0.504427	0.566912	0.637748	0.732252	0.807638	0.91932	1.02458	1.19909	1.30242	1.49393	1.75396	2.13378	2.5538	3.6823	14.3717
0	0	0.0641206	0.10896	0.146832	0.197131	0.245226	0.248047	0.301228	0.354029	0.40774	0.45344	0.504672	0.567215	0.638578	0.733329	0.807693	0.921169	1.0261	1.19924	1.31051	1.49668	1.75396	2.13378	2.5538	3.68748	14.5166
0	0	0.0641692	0.109534	0.146874	0.197279	0.245418	0.248047	0.301484	0.354327	0.408127	0.453993	0.505894	0.567832	0.640437	0.73372	0.807741	0.921246	1.02656	1.19956	1.31112	1.49874	1.75396	2.13378	2.5538	3.68748	14.5166
0	0	0.0642446	0.109707	0.147017	0.198078	0.24628	0.248047	0.302034	0.354909	0.40913	0.454056	0.506696	0.568813	0.640993	0.740746	0.81034	0.92249	1.02761	1.20358	1.31177	1.49901	1.75396	2.13378	2.55637	3.68748	14.6032
0	0	0.0643379	0.109712	0.147092	0.198386	0.246319	0.248047	0.302434	0.356219	0.410136	0.456364	0.506982	0.569698	0.642013	0.741208	0.811082	0.923701	1.03109	1.21461	1.31297	1.50075	1.75396	2.13378	2.56352	3.69621	14.6032
0	0	0.0643941	0.109861	0.147229	0.198596	0.246407	0.248047	0.303273	0.356659	0.410146	0.457086	0.508796	0.572324	0.642145	0.742534	0.811246	0.925833	1.03301	1.21687	1.32046	1.50617	1.75396	2.13378	2.5735	3.7207	14.6032
0	0	0.0644532	0.110081	0.147245	0.198597	0.246665	0.248047	0.304621	0.356835	0.410773	0.457924	0.508851	0.572477	0.642281	0.743207	0.811681	0.926784	1.03576	1.21736	1.32049	1.50881	1.75396	2.13378	2.57728	3.74342	14.9981
0	0	0.0644965	0.110164	0.148397	0.199253	0.246996	0.248047	0.304705	0.356919	0.411294	0.458143	0.508985	0.57275	0.645725	0.744141	0.812815	0.927572	1.03618	1.21761	1.32321	1.50881	1.75396	2.13378	2.57989	3.75077	15.6898
0	0	0.064601	0.110344	0.148539	0.199386	0.247037	0.248047	0.305829	0.356947	0.411786	0.458175	0.509945	0.572961	0.64707	0.744141	0.813337	0.927715	1.03657	1.21852	1.32424	1.50881	1.7557	2.13378	2.58553	3.7644	15.729
0	0	0.0648454	0.110561	0.148724	0.199792	0.24764	0.248047	0.306726	0.357018	0.412506	0.458422	0.510633	0.573342	0.648723	0.744141	0.813666	0.928924	1.0367	1.22078	1.32444	1.50881	1.75604	2.13378	2.58969	3.78391	15.8012
0	0	0.0649444	0.110804	0.148885	0.200053	0.248047	0.248047	0.30683	0.357022	0.412657	0.459782	0.511325	0.573458	0.649473	0.744141	0.814875	0.929722	1.03723	1.22363	1.32456	1.50881	1.75682	2.13378	2.58969	3.78552	15.9697
0	0	0.0649686	0.111273	0.148978	0.200162	0.248047	0.248047	0.307012	0.357179	0.412784	0.460133	0.512371	0.574442	0.649831	0.744141	0.814972	0.92984	1.04118	1.2358	1.32562	1.50881	1.75763	2.13378	2.58969	3.78627	15.9755
0	0	0.0649837	0.112732	0.149031	0.200231	0.248047	0.248047	0.307449	0.358371	0.413263	0.460198	0.513068	0.575255	0.649832	0.744141	0.815459	0.930089	1.0435	1.24023	1.32588	1.51347	1.7689	2.13378	2.58969	3.79476	16.2371
0	0	0.0654848	0.113149	0.149149	0.200298	0.248047	0.248047	0.307619	0.359275	0.414346	0.460866	0.513271	0.575405	0.650115	0.744141	0.816351	0.932218	1.0446	1.24023	1.32937	1.52595	1.77751	2.13654	2.58969	3.80464	16.2504
0	0	0.0655577	0.113202	0.149469	0.200322	0.248047	0.248047	0.307787	0.359669	0.414815	0.461116	0.513671	0.575925	0.650264	0.744141	0.816674	0.935505	1.04697	1.24023	1.33577	1.52612	1.78652	2.14106	2.58969	3.80698	16.2731
0	0	0.065672	0.113264	0.149629	0.200408	0.248047	0.248047	0.308339	0.360231	0.41487	0.462351	0.513716	0.578303	0.651101	0.744141	0.81886	0.936246	1.04836	1.24023	1.33577	1.52614	1.78869	2.15009	2.59631	3.80698	16.3052
0	0.000744141	0.0659153	0.113483	0.149798	0.201297	0.248047	0.248198	0.308973	0.36032	0.414966	0.462429	0.515347	0.578381	0.652615	0.744141	0.820805	0.93715	1.05197	1.24023	1.33577	1.53875	1.79823	2.15474	2.61023	3.80879	16.8562
0	0.00716873	0.0659386	0.113537	0.14982	0.201365	0.248047	0.248606	0.309093	0.360526	0.415112	0.462974	0.516572	0.579064	0.657873	0.744141	0.822254	0.938312	1.05237	1.24023	1.33577	1.54109	1.79988	2.15942	2.62261	3.82656	17.4851
0	0.0084418	0.0661282	0.113587	0.150081	0.202281	0.248047	0.249052	0.309121	0.360562	0.415456	0.463482	0.516698	0.580717	0.658145	0.744141	0.823901	0.939136	1.05238	1.24023	1.33577	1.54285	1.80581	2.16569	2.63677	3.82762	17.6166
0	0.00871789	0.0662063	0.11382	0.151215	0.202303	0.248047	0.249326	0.309158	0.360711	0.416167	0.463621	0.517575	0.580744	0.660322	0.744141	0.824521	0.940494	1.05288	1.24023	1.33577	1.54543	1.80581	2.16702	2.63677	3.82891	18.231
0	0.00899149	0.0663525	0.114247	0.151333	0.202511	0.248047	0.249487	0.310438	0.360791	0.416361	0.463966	0.517881	0.58318	0.660765	0.744141	0.825144	0.941006	1.0547	1.24023	1.33577	1.55014	1.80581	2.16945	2.6494	3.84705	18.7813
0	0.00909693	0.0664072	0.114342	0.151401	0.202618	0.248047	0.249843	0.31053	0.361141	0.417231	0.464409	0.51839	0.584504	0.661724	0.744141	0.826085	0.941713	1.05474	1.24023	1.33577	1.5543	1.80696	2.16985	2.6675	3.8476	18.92
0	0.00918527	0.0669489	0.114516	0.151797	0.202954	0.248047	0.250011	0.311965	0.361871	0.417544	0.464876	0.518393	0.584678	0.662226	0.744141	0.826886	0.94369	1.05577	1.24023	1.33577	1.55549	1.81196	2.17475	2.67155	3.85072	19.3731
0	0.00992885	0.0671802	0.114925	0.151877	0.203077	0.248047	0.250954	0.311973	0.361953	0.417651	0.464882	0.518434	0.584782	0.662402	0.74442	0.828139	0.944693	1.05587	1.24023	1.33577	1.56225	1.8121	2.1837	2.67155	3.85072	19.4064
0	0.00992885	0.067214	0.115005	0.151892	0.20313	0.248047	0.251306	0.312887	0.362524	0.417742	0.464916	0.518826	0.585531	0.663096	0.745046	0.82826	0.949002	1.05936	1.24023	1.33577	1.56879	1.81545	2.19171	2.67155	3.86179	19.4839
0	0.0114995	0.0681264	0.115363	0.152128	0.203225	0.248047	0.251942	0.314266	0.362611	0.418462	0.465757	0.519162	0.585798	0.664863	0.745337	0.829464	0.949288	1.06055	1.24023	1.33577	1.56879	1.8159	2.19255	2.67155	3.90638	21.2584
0	0.0118467	0.0687006	0.115569	0.15262	0.203634	0.248047	0.252465	0.314413	0.362752	0.41847	0.466296	0.519201	0.586003	0.665664	0.74568	0.829704	0.951468	1.0612	1.24023	1.33577	1.56879	1.83864	2.19456	2.67155	3.9116	21.4098
0	0.0122054	0.0689697	0.115603	0.152693	0.204317	0.248047	0.252465	0.315258	0.363187	0.418643	0.467067	0.520104	0.587422	0.666533	0.747117	0.829962	0.951683	1.06124	1.24023	1.33577	1.56879	1.84523	2.20435	2.67155	3.92197	21.47
0	0.0126346	0.0693695	0.116185	0.152972	0.204463	0.248047	0.252489	0.315918	0.363392	0.418848	0.467568	0.520375	0.587519	0.666856	0.74715	0.832697	0.953295	1.06209	1.24023	1.33939	1.56879	1.84777	2.20773	2.67155	3.92197	21.4772
0	0.0132728	0.0698322	0.1162	0.152989	0.204709	0.248047	0.253287	0.316354	0.363494	0.420203	0.467846	0.520792	0.587953	0.669095	0.749768	0.833316	0.954143	1.06325	1.24023	1.34225	1.56943	1.84926	2.21613	2.672	3.92278	21.5744
0	0.0132728	0.0699021	0.116374	0.154204	0.204823	0.248047	0.253288	0.316552	0.363563	0.420508	0.467971	0.52096	0.589052	0.670852	0.750019	0.833496	0.959008	1.06351	1.24023	1.34346	1.57019	1.85036	2.2186	2.68304	3.92642	21.9252
0	0.0132728	0.0699339	0.116388	0.154253	0.205022	0.248047	0.253378	0.317593	0.36367	0.420668	0.468792	0.521802	0.589805	0.671528	0.751332	0.836757	0.961649	1.0643	1.24023	1.3504	1.57279	1.85539	2.2186	2.68304	3.95096	21.9308
0	0.0135436	0.0700671	0.116664	0.15503	0.205157	0.248047	0.253492	0.317776	0.366078	0.420773	0.468955	0.52281	0.589963	0.671863	0.752674	0.837038	0.961729	1.06448	1.24023	1.3537	1.573	1.85729	2.22111	2.68304	3.95571	22.2815
0	0.0141653	0.0702298	0.116725	0.155149	0.205782	0.248047	0.253966	0.31871	0.3669	0.420805	0.469844	0.523231	0.590892	0.673877	0.752959	0.837082	0.964134	1.06977	1.24023	1.3545	1.578	1.86326	2.22932	2.70103	3.96204	22.3256
0	0.0148849	0.0705985	0.116997	0.155182	0.205877	0.248047	0.254159	0.319601	0.367348	0.420862	0.470473	0.523402	0.592074	0.675355	0.753213	0.838747	0.964601	1.07142	1.24023	1.35681	1.58366	1.8762	2.23242	2.70331	3.97607	22.3311
0	0.0150881	0.0707917	0.117035	0.155436	0.205883	0.248047	0.254189	0.319738	0.368752	0.42122	0.47076	0.523958	0.595675	0.676015	0.754542	0.840033	0.965674	1.07385	1.24023	1.35786	1.58488	1.87779	2.23242	2.70388	3.99272	22.4506
0	0.0152165	0.071087	0.117058	0.155619	0.206098	0.248047	0.25422	0.31986	0.368784	0.421397	0.471017	0.524927	0.59586	0.67726	0.755022	0.840235	0.966639	1.07454	1.24023	1.36559	1.58827	1.87782	2.23244	2.70468	3.99634	22.9936
0	0.0162773	0.0711996	0.117355	0.155669	0.206447	0.248047	0.25435	0.319931	0.369986	0.422159	0.471198	0.525943	0.596152	0.677704	0.755046	0.840838	0.969011	1.07832	1.24023	1.36823	1.58827	1.87974	2.2445	2.71896	3.99964	23.4073
0	0.016373	0.0714557	0.117364	0.155737	0.20677	0.248047	0.255079	0.320317	0.370052	0.422318	0.471332	0.526059	0.596512	0.678573	0.755534	0.842665	0.975138	1.07975	1.24023	1.36864	1.58827	1.88907	2.24616	2.72304	4.00692	23.5135
0	0.0164839	0.0715353	0.11778	0.155869	0.207251	0.248047	0.255167	0.320746	0.370246	0.422442	0.471787	0.526704	0.596836	0.680873	0.755922	0.843885	0.976285	1.08028	1.24023	1.36896	1.58827	1.88907	2.24616	2.72993	4.01267	23.8564
0	0.01659	0.0717483	0.11828	0.15613	0.207418	0.248047	0.25556	0.320823	0.370735	0.422614	0.472121	0.527577	0.596916	0.681887	0.757377	0.845415	0.97867	1.08093	1.24023	1.36917	1.58827	1.88907	2.24656	2.74576	4.02969	24.3857
0	0.0170648	0.0719398	0.118895	0.156192	0.207798	0.248047	0.255564	0.321402	0.370832	0.422713	0.472159	0.529315	0.597259	0.682733	0.759913	0.84584	0.978919	1.08247	1.24023	1.37651	1.58827	1.88995	2.25167	2.75033	4.03611	25.3202
0	0.0171727	0.071984	0.119075	0.156277	0.208455	0.248047	0.256701	0.321508	0.370861	0.422722	0.472405	0.530379	0.597854	0.683442	0.759914	0.846131	0.979458	1.08396	1.24023	1.37746	1.58827	1.89003	2.2546	2.75155	4.05129	25.4221
0	0.0181685	0.0720119	0.119121	0.156314	0.208476	0.248047	0.256872	0.321662	0.370884	0.422896	0.473173	0.530734	0.598195	0.683662	0.761012	0.852286	0.980412	1.08559	1.24023	1.3812	1.59681	1.89668	2.25805	2.76102	4.06939	25.433
0	0.0191354	0.0721045	0.119177	0.156468	0.208776	0.248047	0.257103	0.32264	0.370893	0.423027	0.473313	0.531036	0.599687	0.684758	0.762189	0.85383	0.980746	1.08569	1.24023	1.38399	1.59879	1.89697	2.26319	2.76507	4.06988	25.9609
0	0.0193114	0.0725901	0.119683	0.156955	0.208815	0.248047	0.257113	0.322846	0.371372	0.423121	0.473575	0.531837	0.599796	0.686358	0.763007	0.857775	0.98142	1.09063	1.24023	1.38711	1.60363	1.90085	2.27401	2.77325	4.0737	27.8918
0	0.0198825	0.0727387	0.119881	0.157348	0.208865	0.248047	0.257753	0.323173	0.371594	0.423125	0.473638	0.531865	0.602335	0.687012	0.763171	0.861918	0.981496	1.09107	1.24023	1.39255	1.61519	1.90251	2.28206	2.77325	4.07472	29.718
0	0.0198825	0.0730002	0.119896	0.157419	0.208973	0.248047	0.257948	0.323607	0.372133	0.423884	0.473647	0.532651	0.603023	0.687825	0.763574	0.86244	0.984431	1.09357	1.24023	1.39269	1.61809	1.90456	2.28688	2.77325	4.07733	30.1405
0	0.0198825	0.0732803	0.120159	0.157502	0.209135	0.248047	0.258762	0.323694	0.372229	0.424071	0.473709	0.533838	0.603927	0.688504	0.765565	0.862825	0.984767	1.0979	1.24023	1.39317	1.63069	1.90984	2.28688	2.77325	4.08914	30.5913
0	0.0198825	0.0734902	0.120174	0.158428	0.20927	0.248047	0.258817	0.323795	0.372578	0.424393	0.474566	0.534651	0.604064	0.689144	0.766343	0.86367	0.986958	1.10324	1.24023	1.40119	1.63292	1.91268	2.28688	2.77325	4.10338	30.9015
0	0.0198825	0.0737581	0.120647	0.158877	0.209456	0.248047	0.259	0.323902	0.372634	0.424462	0.475375	0.534669	0.604647	0.689362	0.767732	0.864541	0.987835	1.10473	1.24023	1.40166	1.63727	1.91668	2.29053	2.77325	4.1101	31.7267
0	0.0198825	0.0737705	0.121279	0.158964	0.209498	0.248047	0.259046	0.324269	0.372944	0.424676	0.47582	0.534892	0.604832	0.691203	0.767981	0.865236	0.989463	1.10488	1.24023	1.40317	1.64141	1.91883	2.31838	2.77325	4.12769	32.6085
0	0.0200811	0.0749296	0.121463	0.159014	0.209617	0.248047	0.259185	0.324364	0.373211	0.425128	0.47688	0.535751	0.604936	0.691749	0.769913	0.866993	0.990936	1.10504	1.24023	1.40317	1.64399	1.93155	2.33259	2.77325	4.13546	32.7422
0	0.0203584	0.0750014	0.121865	0.159578	0.209667	0.248047	0.26037	0.325403	0.37334	0.425527	0.478624	0.535774	0.605045	0.69214	0.771442	0.86735	0.991512	1.10512	1.24023	1.40317	1.6464	1.93486	2.33443	2.77325	4.15262	33.1029
0	0.0206371	0.0755971	0.121902	0.159648	0.210045	0.248047	0.260371	0.327058	0.37349	0.425592	0.478721	0.535998	0.608563	0.693345	0.771989	0.867968	0.991789	1.10612	1.24023	1.40317	1.65102	1.93731	2.34007	2.77325	4.16719	33.2716
0	0.0206476	0.0756141	0.121929	0.159772	0.21014	0.248047	0.260473	0.32736	0.373748	0.425679	0.47873	0.536728	0.610132	0.694998	0.772063	0.875044	0.992188	1.1093	1.24023	1.40352	1.65435	1.93731	2.34007	2.77325	4.16972	33.6184
0	0.021001	0.0756715	0.122037	0.159949	0.210363	0.248047	0.261476	0.327495	0.374007	0.427557	0.478848	0.536996	0.610659	0.695469	0.775363	0.875894	0.992188	1.1093	1.24023	1.40572	1.65479	1.93731	2.34007	2.77325	4.1723	33.8254
0	0.0223659	0.0757717	0.122037	0.160122	0.2104	0.248047	0.261701	0.327916	0.374041	0.42798	0.479632	0.537457	0.611143	0.695731	0.775584	0.878999	0.992188	1.1093	1.24023	1.40601	1.65898	1.93731	2.34007	2.77325	4.18848	34.1855
0	0.0224266	0.0757742	0.12243	0.160215	0.210697	0.248047	0.261707	0.328435	0.374622	0.428733	0.479687	0.537571	0.611359	0.695918	0.776175	0.880422	0.992188	1.1093	1.24023	1.40939	1.66395	1.93731	2.34007	2.77325	4.21132	34.382
0	0.0225334	0.0758627	0.122703	0.160308	0.21082	0.248047	0.262885	0.328533	0.374698	0.428862	0.479758	0.537836	0.611684	0.696327	0.777937	0.881594	0.992188	1.11205	1.24023	1.41502	1.66395	1.93731	2.34007	2.77325	4.21298	35.37
0	0.0227545	0.0760847	0.122731	0.1608	0.210826	0.248047	0.263001	0.329082	0.374977	0.429518	0.480458	0.538571	0.611893	0.696678	0.779672	0.881904	0.992188	1.11464	1.24023	1.41537	1.66395	1.93731	2.34007	2.77325	4.2166	36.0898
0	0.0228058	0.0762099	0.122779	0.161141	0.210994	0.248047	0.263243	0.329656	0.374986	0.429525	0.48049	0.538805	0.612522	0.701019	0.779759	0.883114	0.992188	1.11519	1.24023	1.4165	1.66395	1.93731	2.34007	2.77325	4.21739	36.7788
0	0.023074	0.076355	0.123165	0.161313	0.211748	0.248047	0.26339	0.329819	0.375903	0.429781	0.480766	0.539937	0.612965	0.701313	0.780495	0.884013	0.992188	1.11584	1.24023	1.41723	1.67068	1.93731	2.34007	2.77325	4.23783	37.4846
0	0.0243241	0.0764793	0.123682	0.161608	0.21181	0.248047	0.26346	0.330876	0.376419	0.429977	0.48197	0.539975	0.613513	0.701583	0.780668	0.885475	0.992188	1.1183	1.24023	1.41815	1.67209	1.94214	2.34007	2.77844	4.23863	37.5215
0	0.0251844	0.0768469	0.12369	0.161891	0.212362	0.248047	0.263695	0.331235	0.376666	0.430436	0.48204	0.54018	0.614561	0.701583	0.78099	0.887241	0.992188	1.12008	1.24023	1.41864	1.67646	1.94625	2.34007	2.78154	4.24211	38.2024
0	0.0252695	0.0770756	0.12372	0.16226	0.212543	0.248047	0.264087	0.331378	0.376785	0.430828	0.482257	0.540238	0.614922	0.701583	0.781552	0.887571	0.992188	1.1207	1.24023	1.41866	1.67687	1.94746	2.34007	2.79286	4.26695	38.9465
0	0.0263567	0.0779697	0.123761	0.162291	0.21272	0.248047	0.264131	0.331632	0.377036	0.431591	0.48232	0.540995	0.615953	0.701583	0.781622	0.887983	0.992188	1.12078	1.24023	1.41927	1.6804	1.95332	2.34007	2.79488	4.28821	41.0321
0	0.0277061	0.0780849	0.12392	0.162387	0.212948	0.248047	0.264211	0.331635	0.377655	0.431862	0.482419	0.541129	0.615979	0.701583	0.782324	0.888528	0.992188	1.12154	1.24023	1.41991	1.68384	1.95518	2.34007	2.7949	4.29332	41.5129
0	0.0277147	0.0783558	0.123954	0.162404	0.212977	0.248047	0.265403	0.333177	0.37776	0.431895	0.483262	0.541369	0.616161	0.701882	0.782479	0.891005	0.992188	1.12253	1.24023	1.42233	1.68772	1.95675	2.34007	2.82817	4.34061	42.1066
0	0.0278261	0.0791198	0.124262	0.162512	0.213421	0.248047	0.265732	0.333427	0.377788	0.432525	0.483975	0.541531	0.619165	0.704493	0.782514	0.891152	0.992188	1.12362	1.24023	1.42256	1.69219	1.95697	2.35158	2.82817	4.36614	42.168
0	0.0288183	0.0794178	0.124474	0.162997	0.213727	0.248047	0.265973	0.334327	0.37839	0.432999	0.484089	0.541536	0.619655	0.706946	0.784393	0.891373	0.992188	1.12864	1.24023	1.42441	1.69444	1.95768	2.35318	2.82817	4.36746	42.6186
0	0.0290225	0.0794232	0.124524	0.163038	0.213745	0.248047	0.266041	0.334353	0.378512	0.433152	0.484721	0.541626	0.620183	0.709396	0.784393	0.891888	0.992577	1.13125	1.24088	1.42975	1.69611	1.95873	2.35318	2.82817	4.36747	43.0031
0	0.0290225	0.0797124	0.124848	0.163267	0.214102	0.248047	0.2671	0.335185	0.378882	0.433367	0.484912	0.541765	0.621785	0.710221	0.784393	0.891997	0.993723	1.13257	1.24527	1.43757	1.70435	1.96534	2.35318	2.84178	4.43228	43.9491
0	0.0291666	0.0797567	0.124913	0.163684	0.214657	0.248047	0.268222	0.335294	0.380147	0.433466	0.484983	0.542402	0.621801	0.710736	0.784393	0.893287	0.994805	1.13282	1.24891	1.44465	1.70692	1.96662	2.35318	2.8837	4.47173	45.1997
0	0.029188	0.0798726	0.125017	0.163756	0.214726	0.248047	0.268479	0.33588	0.380487	0.434099	0.484984	0.543874	0.622213	0.710797	0.784393	0.893706	0.994951	1.13459	1.24943	1.4456	1.70842	1.9724	2.35318	2.8927	4.47173	45.9697
0	0.0292498	0.0800935	0.125068	0.165037	0.214922	0.248047	0.268637	0.336043	0.381109	0.434193	0.48528	0.543893	0.622437	0.711387	0.784393	0.894346	0.996667	1.13926	1.25085	1.44635	1.71496	1.97534	2.36262	2.90331	4.47173	46.0873
0	0.0293768	0.0801274	0.125615	0.165514	0.215277	0.248047	0.269283	0.336146	0.381653	0.434499	0.485784	0.54442	0.622965	0.711433	0.784393	0.894346	0.997193	1.13977	1.25603	1.44635	1.71629	1.97542	2.3812	2.91653	4.47173	46.1294
0	0.0297377	0.0804729	0.125815	0.165619	0.215558	0.248047	0.270009	0.336729	0.381738	0.434591	0.486112	0.545444	0.623085	0.711962	0.784393	0.894346	0.997988	1.14315	1.2586	1.44635	1.71631	1.98438	2.3824	2.92474	4.47173	46.3051
0	0.0300029	0.0806929	0.125898	0.166076	0.215594	0.248047	0.270735	0.336827	0.382052	0.435756	0.487221	0.545897	0.623169	0.712	0.784393	0.894346	0.998539	1.14956	1.26083	1.44635	1.71674	1.98438	2.38886	2.92923	4.47173	48.3761
0	0.0306476	0.0807088	0.127117	0.166176	0.215761	0.248047	0.27108	0.33693	0.382284	0.436216	0.487956	0.546108	0.624153	0.712028	0.784393	0.894346	0.999244	1.14997	1.2648	1.44635	1.72745	1.98438	2.39807	2.92974	4.48509	48.4905
0	0.0308858	0.0807582	0.127166	0.166608	0.215806	0.248047	0.271085	0.336938	0.382379	0.43627	0.488695	0.546732	0.627702	0.713444	0.784393	0.894346	0.999337	1.15085	1.2648	1.44635	1.73247	1.98438	2.39828	2.9429	4.49109	48.7044
0	0.0310193	0.0808728	0.127451	0.166866	0.216031	0.248047	0.271679	0.337197	0.382381	0.43647	0.488745	0.547867	0.62802	0.716572	0.784393	0.894346	1.00467	1.15301	1.2648	1.44635	1.73496	1.98489	2.40388	2.94411	4.52613	48.9809
0	0.0313426	0.0809455	0.127623	0.167043	0.216044	0.248047	0.272221	0.337701	0.382842	0.436569	0.489033	0.548666	0.628158	0.716861	0.785498	0.894346	1.00599	1.1546	1.2648	1.44635	1.73633	1.98687	2.41201	2.9468	4.52679	49.3314
0	0.0313684	0.0814011	0.127686	0.167429	0.216199	0.248047	0.272314	0.337706	0.383009	0.436884	0.489236	0.549322	0.629055	0.72006	0.785941	0.894346	1.0065	1.15583	1.2648	1.44635	1.73633	1.9884	2.41996	2.95069	4.56029	49.3638
0	0.0315342	0.0814646	0.128374	0.167756	0.216407	0.248047	0.273155	0.33837	0.383739	0.437741	0.489456	0.549874	0.629973	0.72064	0.786236	0.894346	1.00791	1.15654	1.2648	1.44635	1.73633	1.99378	2.42488	2.95368	4.58288	50.1153
0	0.0320358	0.0824121	0.12887	0.168233	0.21669	0.248047	0.273458	0.339022	0.384035	0.437989	0.490459	0.55024	0.631014	0.722778	0.788167	0.899919	1.00812	1.15716	1.2648	1.44635	1.73633	1.99479	2.42493	2.96194	4.5916	50.6125
0	0.0321546	0.0827192	0.129096	0.168329	0.216865	0.248047	0.273621	0.339208	0.384079	0.440533	0.490639	0.550762	0.631032	0.722872	0.789874	0.900046	1.00824	1.15778	1.2648	1.44635	1.73633	1.99828	2.43007	2.97958	4.59515	51.1843
0	0.0322885	0.0828218	0.129199	0.16852	0.217168	0.248047	0.274002	0.339282	0.384127	0.440891	0.490837	0.551116	0.631243	0.723735	0.791105	0.901456	1.01057	1.16137	1.2648	1.44908	1.74507	1.99982	2.43309	2.98111	4.6339	51.2263
0	0.0323955	0.0828578	0.129597	0.169513	0.217503	0.248047	0.274038	0.339724	0.38454	0.440934	0.491711	0.551448	0.632613	0.725104	0.791203	0.903347	1.01198	1.1646	1.2648	1.45183	1.74598	1.99982	2.43426	2.9864	4.64555	51.8086
0	0.0327123	0.083657	0.129704	0.169577	0.21766	0.248047	0.274593	0.33981	0.384756	0.441041	0.492019	0.553662	0.632627	0.727085	0.791466	0.903565	1.01308	1.16556	1.2648	1.45689	1.74746	1.99982	2.43914	2.98688	4.68014	52.2538
0	0.0330722	0.0836776	0.129856	0.169676	0.217925	0.248047	0.274666	0.340028	0.385368	0.441059	0.492851	0.55465	0.634222	0.727315	0.794304	0.905321	1.01378	1.16639	1.2648	1.46174	1.74874	1.99982	2.44236	2.99716	4.68014	52.3103
0	0.0332281	0.0836988	0.12994	0.169702	0.218331	0.248047	0.275932	0.340448	0.385867	0.441348	0.492923	0.55465	0.634939	0.731752	0.795835	0.90764	1.0138	1.17093	1.2648	1.46506	1.74896	1.99982	2.44298	2.99716	4.68014	52.7005
0	0.0332385	0.0839356	0.130121	0.169748	0.218383	0.248047	0.276095	0.340636	0.386001	0.44198	0.493809	0.55465	0.635156	0.731992	0.797318	0.907866	1.01391	1.1763	1.2648	1.46837	1.75164	1.99982	2.44298	2.99716	4.68115	52.7967
0	0.0336069	0.0840162	0.13073	0.169968	0.218443	0.248047	0.27689	0.340749	0.386262	0.44211	0.494154	0.55465	0.635718	0.732983	0.797878	0.908751	1.01688	1.17806	1.2648	1.47602	1.75243	1.99982	2.44298	2.99716	4.68489	53.3808
0	0.0336778	0.084057	0.130758	0.170077	0.218743	0.248047	0.277356	0.341128	0.386463	0.442357	0.494277	0.55465	0.636814	0.734463	0.799191	0.910891	1.01942	1.18718	1.2648	1.47709	1.75369	1.99982	2.44323	2.99716	4.73801	53.6246
0	0.0337063	0.0841001	0.130878	0.170102	0.218869	0.248047	0.277417	0.341277	0.386495	0.44236	0.495142	0.55465	0.636935	0.734511	0.799209	0.914839	1.02077	1.19257	1.26779	1.47753	1.75396	1.99982	2.4438	2.99716	4.79058	53.9107
0	0.0337859	0.0844887	0.130959	0.170151	0.21939	0.248047	0.277838	0.341857	0.386495	0.442404	0.496094	0.55465	0.63696	0.735293	0.799282	0.919644	1.02272	1.19285	1.28388	1.48138	1.75396	2.00278	2.44714	2.99716	4.8308	54.0452
0	0.0338586	0.0844981	0.131125	0.170223	0.219639	0.248047	0.27788	0.34205	0.386703	0.442551	0.496094	0.55465	0.637179	0.735686	0.799803	0.921039	1.02272	1.19341	1.28443	1.483	1.75396	2.00404	2.44762	3.00157	4.83806	54.1975
0	0.0339881	0.0845117	0.131243	0.171419	0.219923	0.248047	0.277903	0.342562	0.387462	0.444269	0.496094	0.55465	0.637314	0.735847	0.80295	0.925177	1.02272	1.19629	1.28675	1.48828	1.75396	2.00784	2.45089	3.0278	4.89225	54.5793
0	0.0341398	0.0845852	0.131589	0.171725	0.220491	0.248047	0.278315	0.342719	0.388181	0.444623	0.496094	0.55465	0.637369	0.736889	0.803945	0.926553	1.02367	1.19677	1.29207	1.48828	1.75396	2.00909	2.45554	3.0278	4.89225	54.5844
0	0.0345661	0.0846295	0.131617	0.171754	0.220756	0.248047	0.27914	0.342723	0.388408	0.446188	0.496094	0.55465	0.638675	0.737472	0.804551	0.929093	1.02395	1.19822	1.29252	1.48828	1.75396	2.01299	2.45737	3.0278	4.89225	55.1289
0	0.0346565	0.0849977	0.131801	0.172774	0.221062	0.248047	0.279446	0.342909	0.388711	0.446334	0.496094	0.55465	0.639933	0.73896	0.805093	0.931219	1.02485	1.1989	1.29508	1.48828	1.75396	2.01566	2.45739	3.0278	4.89918	55.7935
0	0.0347613	0.0853077	0.132022	0.173	0.221598	0.248047	0.279523	0.344408	0.389475	0.446993	0.496094	0.55465	0.640359	0.739779	0.80679	0.931329	1.02701	1.20004	1.29602	1.48828	1.75396	2.01634	2.47745	3.0278	4.92392	55.8128
0	0.034825	0.0853502	0.133008	0.173147	0.222627	0.248047	0.280453	0.344539	0.389569	0.447147	0.496094	0.55465	0.641047	0.739868	0.807343	0.932829	1.03082	1.20113	1.29618	1.48828	1.75396	2.01776	2.48047	3.0278	4.94836	55.9669
0	0.0348561	0.0857247	0.133546	0.173779	0.222811	0.248047	0.280927	0.344614	0.390231	0.447551	0.496094	0.55465	0.641086	0.740923	0.80736	0.935244	1.03126	1.20802	1.30307	1.48828	1.75396	2.02115	2.48047	3.028	4.97186	56.5743
0	0.0356209	0.0857285	0.133873	0.17381	0.224065	0.248047	0.280928	0.344682	0.391353	0.447904	0.496094	0.55465	0.641389	0.744141	0.807662	0.935826	1.03389	1.20899	1.31108	1.48828	1.75396	2.0267	2.48047	3.04092	5.01644	57.3525
0	0.0357295	0.0861374	0.134003	0.174098	0.224117	0.248047	0.281013	0.345366	0.391389	0.448215	0.496094	0.55465	0.641452	0.744141	0.808679	0.935951	1.03726	1.21131	1.31197	1.48828	1.75396	2.03028	2.48047	3.05735	5.03486	57.3997
0	0.0360087	0.0864973	0.134095	0.174098	0.224245	0.248047	0.281255	0.345728	0.392413	0.448917	0.496094	0.55465	0.64227	0.744141	0.809841	0.936475	1.0376	1.21161	1.31345	1.49211	1.75396	2.03621	2.48047	3.06114	5.04957	58.1325
0	0.0361587	0.0866981	0.134682	0.174194	0.224495	0.248047	0.281567	0.346628	0.392708	0.449376	0.496094	0.55465	0.643716	0.744141	0.810468	0.937237	1.0382	1.21236	1.31486	1.49921	1.75396	2.03658	2.48047	3.06823	5.09266	58.6734
0	0.0363814	0.0870556	0.134716	0.174297	0.225441	0.248047	0.2819	0.347241	0.392949	0.449568	0.496094	0.554811	0.64434	0.744141	0.811421	0.937512	1.03878	1.213	1.31503	1.5016	1.75396	2.03953	2.48047	3.09578	5.09327	58.9841
0	0.0368736	0.08708	0.134736	0.175076	0.225469	0.248047	0.282061	0.347484	0.393155	0.449635	0.496094	0.558106	0.651262	0.744141	0.815787	0.938976	1.03917	1.21503	1.31899	1.5084	1.75396	2.04279	2.48047	3.10255	5.1076	59.0602
0	0.0370301	0.0871122	0.134755	0.175206	0.225849	0.248047	0.282187	0.347881	0.394004	0.449901	0.496094	0.560209	0.654414	0.744141	0.816626	0.940542	1.03994	1.21669	1.31957	1.50881	1.75396	2.04545	2.48047	3.11605	5.1076	60.591
0	0.0370533	0.0872612	0.134912	0.175242	0.22588	0.248047	0.282433	0.348377	0.394164	0.44997	0.496094	0.561114	0.654775	0.744141	0.818971	0.940984	1.0416	1.2189	1.32142	1.50881	1.75396	2.04545	2.48047	3.12264	5.1076	62.3521
0	0.0375826	0.0875634	0.135426	0.175347	0.226078	0.248047	0.283113	0.348588	0.394404	0.450342	0.496094	0.561248	0.655675	0.744141	0.819413	0.941796	1.04174	1.21931	1.32346	1.50881	1.75396	2.04545	2.48047	3.12969	5.10971	64.0067
0	0.0380754	0.0876417	0.135573	0.175392	0.226094	0.248047	0.283956	0.349081	0.394863	0.450713	0.496094	0.561259	0.656122	0.744141	0.819633	0.942304	1.044	1.22145	1.32585	1.50881	1.75396	2.04545	2.48047	3.13757	5.11362	64.0254
0	0.038315	0.0876868	0.13585	0.175769	0.226194	0.248047	0.284699	0.349233	0.395084	0.451009	0.496094	0.561702	0.656674	0.744141	0.819637	0.942934	1.0461	1.22457	1.33004	1.50881	1.75396	2.04875	2.48047	3.14051	5.12954	65.4665
0	0.0384859	0.0876978	0.136235	0.175785	0.226278	0.248047	0.284741	0.349964	0.395546	0.452147	0.496094	0.561712	0.659002	0.744141	0.819721	0.943279	1.04673	1.22932	1.33217	1.50881	1.75396	2.0599	2.48047	3.15034	5.14499	66.9786
0	0.0385296	0.0881049	0.136427	0.175802	0.22646	0.248047	0.284947	0.350516	0.39603	0.452278	0.496094	0.561943	0.659555	0.744141	0.820295	0.943867	1.04787	1.23257	1.33309	1.50881	1.75396	2.08081	2.48047	3.15712	5.23099	67.9418
0	0.0386605	0.0885188	0.136808	0.175817	0.226502	0.248047	0.285252	0.350791	0.396322	0.452334	0.496094	0.562164	0.659567	0.744141	0.821924	0.947818	1.05237	1.2352	1.33577	1.50881	1.75396	2.08784	2.48137	3.17655	5.29946	69.1659
0	0.0388581	0.0886053	0.136885	0.17596	0.22734	0.248047	0.285311	0.350791	0.396429	0.452566	0.496094	0.5622	0.661979	0.744141	0.824054	0.948798	1.05237	1.2363	1.33577	1.51101	1.75396	2.09542	2.48326	3.17655	5.3297	70.5649
0	0.0391916	0.0886948	0.136966	0.175995	0.227514	0.248047	0.285896	0.350791	0.396701	0.452944	0.496094	0.563366	0.662125	0.744141	0.826447	0.949527	1.05237	1.23778	1.33577	1.51583	1.75396	2.10814	2.48881	3.17655	5.43887	70.9301
0	0.0392216	0.0892109	0.136971	0.176117	0.22778	0.248047	0.28639	0.350791	0.397196	0.453381	0.496094	0.566554	0.663154	0.744141	0.826937	0.949829	1.05237	1.24023	1.33577	1.51929	1.75396	2.11108	2.49284	3.17655	5.49734	72.6782
0	0.039545	0.0892404	0.137207	0.176343	0.228028	0.248047	0.286649	0.350791	0.397714	0.453856	0.496094	0.567208	0.663308	0.744141	0.830024	0.951605	1.05316	1.24023	1.33577	1.52073	1.75396	2.11338	2.49284	3.17655	5.50081	73.4194
0	0.0396953	0.0896954	0.137343	0.176377	0.228428	0.248047	0.286807	0.350791	0.397821	0.454218	0.496094	0.567906	0.665025	0.744141	0.830387	0.951898	1.05546	1.24023	1.33577	1.52319	1.75396	2.11583	2.49284	3.19926	5.59975	73.9995
0	0.0397574	0.0898383	0.138086	0.176504	0.228465	0.248047	0.286831	0.350791	0.398112	0.454444	0.496094	0.568143	0.665029	0.744141	0.835556	0.952595	1.05786	1.24023	1.33577	1.52735	1.75396	2.11931	2.49284	3.2123	5.63867	74.12
0	0.0401595	0.089855	0.138097	0.177478	0.228518	0.248047	0.287964	0.350791	0.398438	0.454476	0.496094	0.568426	0.665411	0.744141	0.83711	0.952965	1.05917	1.24023	1.33577	1.52775	1.75396	2.11931	2.49284	3.22461	5.79071	74.6749
0	0.0404267	0.0900217	0.138151	0.177566	0.229685	0.248047	0.28817	0.350791	0.398827	0.454708	0.496094	0.568781	0.665798	0.744141	0.837554	0.95425	1.06117	1.24023	1.33577	1.52923	1.75396	2.11931	2.49284	3.22461	5.89601	76.2154
0	0.0405236	0.0901408	0.13849	0.177679	0.229835	0.248047	0.288556	0.350791	0.399119	0.454994	0.496094	0.569092	0.667035	0.744141	0.839712	0.956637	1.06287	1.24023	1.33577	1.5312	1.75396	2.13036	2.49284	3.23414	6.18482	77.7669
0	0.0405314	0.0901705	0.138906	0.177877	0.230118	0.248047	0.288833	0.350791	0.399627	0.455189	0.496094	0.571164	0.667096	0.744141	0.841128	0.956959	1.06299	1.24023	1.33577	1.53227	1.75396	2.13378	2.49284	3.23427	6.19502	78.7778
0	0.0408452	0.0904781	0.139043	0.177969	0.230548	0.248047	0.29014	0.350791	0.399803	0.455412	0.496094	0.571204	0.667382	0.74417	0.84139	0.957041	1.06352	1.24023	1.33577	1.53501	1.75396	2.13378	2.49666	3.26142	6.20257	79.3227
0	0.0408647	0.0905294	0.13914	0.178045	0.230794	0.248047	0.290144	0.350791	0.40049	0.455455	0.496094	0.572223	0.667474	0.744862	0.842048	0.957706	1.06562	1.24023	1.33577	1.53936	1.75396	2.13378	2.5029	3.29874	6.24379
0	0.0409089	0.090568	0.13923	0.178605	0.230934	0.248047	0.290396	0.350791	0.400686	0.456625	0.496094	0.573478	0.669609	0.74753	0.842409	0.957712	1.06721	1.24023	1.33577	1.53954	1.75396	2.13378	2.50364	3.3022	6.31424
0	0.0412178	0.0911488	0.139738	0.178681	0.231612	0.248047	0.29067	0.350791	0.400934	0.457981	0.496094	0.574211	0.670465	0.748434	0.845227	0.957975	1.06821	1.24023	1.33577	1.544	1.75396	2.13378	2.5095	3.31345	6.58169
0	0.0414329	0.091282	0.139887	0.178887	0.232023	0.248047	0.290729	0.350791	0.401268	0.458302	0.496094	0.574222	0.673661	0.748444	0.846015	0.959552	1.07115	1.24023	1.33577	1.54889	1.75396	2.13378	2.51591	3.33241	6.66503
0	0.0416024	0.0913762	0.140086	0.179595	0.232416	0.248047	0.291708	0.350791	0.401631	0.458386	0.496094	0.574625	0.674001	0.750343	0.846413	0.962188	1.07139	1.24023	1.33881	1.55842	1.75396	2.13378	2.51604	3.33713	6.73102
0	0.0417981	0.0914783	0.14024	0.179873	0.232712	0.248047	0.291759	0.350791	0.401872	0.45905	0.496094	0.57477	0.675267	0.750592	0.849496	0.966314	1.07336	1.24023	1.33997	1.55993	1.75396	2.13378	2.51784	3.33713	6.95631
0	0.04184	0.0918045	0.140311	0.179882	0.233004	0.248047	0.291933	0.350791	0.402708	0.45921	0.496094	0.578421	0.675577	0.7508	0.851824	0.966355	1.07484	1.24023	1.34016	1.56262	1.75992	2.13378	2.51891	3.33713	6.97782
0	0.0421183	0.0922575	0.140614	0.180107	0.233047	0.248047	0.292351	0.350791	0.403175	0.459574	0.496094	0.579175	0.677645	0.75174	0.851846	0.966364	1.07665	1.24023	1.34034	1.5662	1.77	2.13378	2.52534	3.33713	7.01583
0	0.0429316	0.0924933	0.140637	0.180819	0.233144	0.248047	0.292765	0.350791	0.403669	0.460043	0.496095	0.579752	0.678116	0.753252	0.853818	0.966919	1.07713	1.24023	1.3405	1.56879	1.77538	2.13378	2.52959	3.33713	7.19336
0	0.0429322	0.0927315	0.140761	0.181404	0.233185	0.248109	0.293202	0.351194	0.403698	0.460595	0.496344	0.579959	0.679157	0.75467	0.854683	0.968895	1.07899	1.24023	1.3419	1.56879	1.77761	2.13378	2.52959	3.33839	7.19336
0	0.0431074	0.0931339	0.140914	0.181457	0.233955	0.248487	0.293538	0.351607	0.403731	0.460674	0.496447	0.580208	0.67936	0.756546	0.856291	0.971963	1.08011	1.24023	1.34553	1.56879	1.77764	2.13378	2.52959	3.34666	7.37496
0	0.0431746	0.0939918	0.140917	0.181708	0.234047	0.249506	0.293721	0.351818	0.403838	0.46103	0.496991	0.580439	0.67962	0.757488	0.856335	0.974481	1.0858	1.24023	1.3465	1.56879	1.78402	2.13378	2.52959	3.35859	7.37496
0	0.0431903	0.0939932	0.141005	0.18215	0.234734	0.24961	0.293987	0.351998	0.404269	0.461493	0.497708	0.581282	0.680522	0.758597	0.858135	0.977245	1.08739	1.24023	1.34915	1.56879	1.78434	2.15303	2.52959	3.45489	7.37796
0	0.0432598	0.094584	0.141152	0.182335	0.235307	0.249921	0.29436	0.352533	0.404389	0.461798	0.498185	0.58167	0.680833	0.759378	0.859727	0.980625	1.08911	1.24023	1.35235	1.56879	1.78786	2.15465	2.52959	3.45489	7.56035
0	0.0433481	0.0946007	0.141257	0.182358	0.235795	0.250206	0.294906	0.352913	0.40449	0.462251	0.498902	0.582436	0.681541	0.762052	0.860505	0.981269	1.09164	1.24023	1.35398	1.56879	1.78863	2.1549	2.52959	3.45489	7.56035
0	0.0436577	0.0946217	0.141274	0.182815	0.236723	0.250335	0.295092	0.353043	0.404554	0.462993	0.499845	0.58259	0.683696	0.762927	0.860584	0.984637	1.09475	1.24023	1.35607	1.57878	1.78869	2.1568	2.53653	3.45489	7.56035
0	0.0437866	0.0949618	0.14138	0.183035	0.236853	0.250683	0.296316	0.353358	0.404656	0.463533	0.500438	0.583936	0.687342	0.763317	0.860751	0.986039	1.09661	1.24023	1.35799	1.58059	1.78869	2.1585	2.54047	3.47546	7.57254
0	0.0442583	0.0950833	0.141403	0.18415	0.23714	0.250808	0.296502	0.354016	0.404701	0.464022	0.501013	0.584524	0.688828	0.765176	0.863379	0.986834	1.09685	1.24023	1.3599	1.58142	1.78869	2.16292	2.54689	3.49298	7.78523
0	0.0444274	0.0952216	0.141482	0.18478	0.237279	0.251337	0.296722	0.355606	0.405378	0.465331	0.501207	0.586248	0.689462	0.766887	0.864026	0.986963	1.09833	1.24023	1.36275	1.5815	1.7892	2.16474	2.5538	3.50791	7.92586
0	0.0445646	0.0952658	0.141755	0.185232	0.23769	0.251795	0.296981	0.355684	0.405504	0.466554	0.501978	0.586705	0.68994	0.767838	0.864633	0.988232	1.10053	1.24023	1.36412	1.58765	1.79577	2.1711	2.5538	3.50791	8.0857
0	0.0447374	0.0957141	0.142235	0.185322	0.23784	0.252645	0.297811	0.356139	0.405595	0.466624	0.50234	0.587753	0.690211	0.768095	0.864855	0.989035	1.10145	1.24023	1.36941	1.58827	1.79993	2.17837	2.5538	3.50791	8.12519
0	0.0447427	0.09643	0.142279	0.185383	0.237914	0.25289	0.298041	0.35645	0.405645	0.467182	0.502565	0.588133	0.690743	0.770435	0.86488	0.990816	1.10292	1.24023	1.37056	1.58827	1.80209	2.19492	2.5538	3.50791	8.13654
0	0.0448836	0.0968023	0.142318	0.185742	0.238242	0.2538	0.298362	0.356511	0.405741	0.467465	0.503643	0.589246	0.691062	0.770867	0.86538	0.991533	1.10558	1.24023	1.37778	1.58827	1.80427	2.20877	2.5538	3.50791	8.21181
0	0.0448965	0.0968819	0.142583	0.185929	0.238332	0.254275	0.298601	0.356627	0.40688	0.467633	0.504021	0.589408	0.69249	0.772725	0.865906	0.992188	1.10673	1.24023	1.3788	1.58827	1.80581	2.21379	2.5538	3.50806	8.31975
0	0.0449098	0.0973426	0.142632	0.186064	0.238588	0.254515	0.298613	0.35702	0.406923	0.468049	0.504835	0.590104	0.693829	0.773353	0.869683	0.992188	1.1093	1.24023	1.37989	1.58827	1.80581	2.21565	2.5538	3.51904	8.31975
0	0.0449597	0.0978284	0.142674	0.186547	0.239348	0.254868	0.299226	0.35724	0.406927	0.468274	0.504887	0.591948	0.694302	0.773645	0.870375	0.992188	1.1093	1.24023	1.38068	1.58827	1.80581	2.2186	2.5538	3.54166	8.31975
0	0.0454435	0.0982204	0.143043	0.186601	0.239365	0.255057	0.299255	0.357688	0.407144	0.468434	0.505084	0.592425	0.694832	0.774388	0.87083	0.992188	1.1093	1.24023	1.38361	1.58827	1.80607	2.22209	2.55953	3.55149	8.31975
0	0.0458741	0.0982294	0.143211	0.186719	0.24018	0.255857	0.299374	0.358063	0.407171	0.468725	0.505456	0.593541	0.695275	0.775235	0.87096	0.992188	1.1093	1.24023	1.3851	1.58827	1.80744	2.22864	2.56196	3.56673	8.34804
0	0.0465394	0.0983356	0.143526	0.186779	0.240801	0.256425	0.299855	0.358241	0.408043	0.469334	0.505716	0.594084	0.696409	0.775846	0.871776	0.992188	1.1093	1.24023	1.38727	1.58827	1.81256	2.23242	2.56791	3.56906	8.54233
0	0.0466462	0.0983687	0.143571	0.186938	0.240816	0.256721	0.300538	0.358319	0.40809	0.469335	0.505753	0.594927	0.696905	0.776446	0.872486	0.992188	1.10981	1.24023	1.3929	1.58827	1.8154	2.23242	2.58344	3.59222	8.6958
0	0.0468214	0.0983912	0.143651	0.186968	0.240926	0.256961	0.30095	0.358691	0.408238	0.469608	0.506183	0.595887	0.696984	0.777753	0.873125	0.992188	1.11366	1.24023	1.39812	1.58827	1.82183	2.23242	2.58969	3.5934	8.72808
0	0.0470598	0.0984987	0.143831	0.187178	0.241066	0.257071	0.301	0.358957	0.409247	0.469719	0.506214	0.59592	0.698572	0.777818	0.874033	0.992188	1.11594	1.24023	1.4029	1.59014	1.82476	2.23242	2.58969	3.62081	8.76627
0	0.0474582	0.0985196	0.144026	0.187211	0.24149	0.257099	0.301284	0.359245	0.409501	0.470513	0.506685	0.596558	0.69957	0.777897	0.874792	0.992188	1.11865	1.24023	1.40317	1.59058	1.82884	2.24616	2.58969	3.63325	8.95803
0	0.0475351	0.098558	0.144118	0.187311	0.241602	0.257254	0.302067	0.359389	0.409634	0.470699	0.509787	0.597463	0.701038	0.778181	0.875393	0.992188	1.12036	1.24023	1.40342	1.59805	1.82924	2.24616	2.58969	3.63495	9.21787
0	0.0475655	0.0986244	0.144148	0.187481	0.242387	0.257447	0.302317	0.359811	0.40967	0.471512	0.51087	0.597979	0.701583	0.778648	0.88154	0.992188	1.12521	1.24023	1.40359	1.59834	1.82958	2.24616	2.58969	3.63872	9.28205
0	0.0476006	0.0987166	0.144235	0.187704	0.242716	0.257544	0.30288	0.36024	0.40978	0.471787	0.511914	0.598148	0.701583	0.778968	0.881863	0.992188	1.12719	1.24023	1.40723	1.60005	1.83063	2.24616	2.58969	3.6406	9.67383
0	0.047651	0.098927	0.144564	0.188249	0.243056	0.257568	0.302996	0.360287	0.410275	0.471892	0.5129	0.599009	0.701583	0.778993	0.882892	0.992188	1.12819	1.24023	1.40887	1.60232	1.83933	2.25304	2.58969	3.66242	9.81275
0	0.0478224	0.0991881	0.144688	0.188762	0.24353	0.259117	0.303	0.360486	0.410551	0.472365	0.512907	0.600977	0.703048	0.781242	0.88291	0.992188	1.12851	1.24023	1.41699	1.60312	1.83962	2.25416	2.59007	3.68748	9.8846
0	0.0479195	0.0994093	0.144882	0.188866	0.243802	0.259642	0.3034	0.360989	0.410965	0.472513	0.513065	0.601099	0.703814	0.781703	0.883496	0.992188	1.12999	1.24023	1.41727	1.60749	1.84186	2.25642	2.59214	3.70437	9.9621
0	0.0481065	0.0994363	0.144929	0.188923	0.243843	0.259834	0.304629	0.361215	0.411174	0.474317	0.513745	0.601427	0.705627	0.783042	0.88456	0.992188	1.13115	1.24023	1.42245	1.60839	1.84223	2.26108	2.5968	3.71077	10.3587
0	0.048258	0.0995513	0.145046	0.188992	0.243845	0.260165	0.304713	0.36136	0.411294	0.475621	0.513927	0.602232	0.707349	0.783201	0.885269	0.992188	1.13228	1.24023	1.42534	1.61409	1.85452	2.27727	2.61122	3.7162	10.5296
0	0.0483241	0.0996349	0.145141	0.189201	0.244126	0.260201	0.304779	0.361419	0.411608	0.475966	0.514001	0.602892	0.70962	0.784393	0.886079	0.992188	1.1336	1.24023	1.42742	1.61435	1.8562	2.28316	2.62275	3.72991	11.3615
0	0.0483502	0.0998373	0.145197	0.189329	0.244265	0.260473	0.305089	0.362426	0.411774	0.476045	0.515875	0.603155	0.709651	0.784393	0.888914	0.992188	1.13433	1.24023	1.42958	1.61476	1.85739	2.28688	2.63677	3.73221	12.2551
0	0.0485361	0.0999885	0.145208	0.189653	0.244772	0.260637	0.305444	0.363036	0.41233	0.476119	0.516274	0.603265	0.709873	0.784393	0.88925	0.992188	1.13809	1.24023	1.43267	1.621	1.86248	2.28688	2.64454	3.77714	12.5208
0	0.0486188	0.10001	0.145667	0.189803	0.244847	0.260892	0.305823	0.363682	0.412808	0.476274	0.516277	0.603391	0.711492	0.784393	0.889915	0.992188	1.13828	1.24023	1.43475	1.63465	1.86564	2.28688	2.64585	3.78025	13.3577
0	0.0486188	0.100077	0.145867	0.190501	0.244998	0.261353	0.306835	0.364052	0.413246	0.476981	0.516342	0.604042	0.712855	0.784393	0.890793	0.992188	1.14005	1.24023	1.4357	1.64255	1.86592	2.28688	2.66288	3.78944	13.4998
0	0.0486743	0.100588	0.146903	0.190513	0.24506	0.261428	0.306881	0.36476	0.413414	0.477727	0.516826	0.604816	0.713758	0.784393	0.890914	0.992188	1.14149	1.24023	1.43772	1.64585	1.86634	2.28688	2.664	3.79316	13.5543
0	0.0486743	0.101217	0.147334	0.190751	0.245167	0.261744	0.307167	0.365123	0.414479	0.477984	0.517477	0.604957	0.714267	0.784393	0.892894	0.992188	1.14153	1.24023	1.44308	1.64798	1.86671	2.28872	2.66723	3.81134	13.5884
0	0.0488407	0.101362	0.147483	0.191391	0.245392	0.262031	0.30737	0.365127	0.414616	0.478124	0.518206	0.607281	0.716645	0.784393	0.893783	0.992188	1.14474	1.24023	1.44635	1.65155	1.86749	2.2901	2.67093	3.82399	13.7325
0	0.0490935	0.101547	0.14758	0.191671	0.245449	0.262336	0.30807	0.365296	0.414871	0.478194	0.519977	0.607789	0.717832	0.784393	0.894164	0.992188	1.15186	1.24023	1.44635	1.65438	1.87737	2.29129	2.67155	3.83358	13.9105
0	0.0492048	0.101626	0.147736	0.191914	0.245931	0.262445	0.308278	0.36536	0.414903	0.478567	0.521224	0.608732	0.719976	0.784393	0.894346	0.992188	1.15482	1.24023	1.44635	1.66034	1.88103	2.30893	2.67155	3.83638	13.9657
0	0.0497433	0.102097	0.147783	0.192105	0.245966	0.262731	0.309317	0.365895	0.415364	0.478748	0.522984	0.609131	0.720622	0.784393	0.894346	0.992473	1.15521	1.24023	1.44635	1.66077	1.88222	2.30953	2.67155	3.84178	14.1408
0	0.049863	0.102116	0.147887	0.192236	0.246101	0.262924	0.309434	0.366094	0.415803	0.479314	0.524363	0.610183	0.720867	0.785019	0.894346	0.993547	1.15539	1.24023	1.44635	1.66395	1.88269	2.3117	2.67155	3.84501	14.3717
0	0.050046	0.10246	0.148699	0.192253	0.246132	0.263407	0.309791	0.367278	0.416172	0.479508	0.524389	0.610776	0.720946	0.785174	0.894346	0.994046	1.16264	1.24023	1.44635	1.66395	1.88271	2.31361	2.67155	3.85522	14.5166
0	0.0500755	0.102668	0.148729	0.192597	0.246173	0.263799	0.311346	0.367546	0.417821	0.480219	0.524808	0.611225	0.721247	0.785281	0.894346	0.994972	1.16345	1.24023	1.44635	1.66395	1.88907	2.31626	2.67155	3.8587	14.5166
0	0.0500915	0.102718	0.149002	0.192844	0.246215	0.264004	0.311391	0.367696	0.418044	0.480516	0.526134	0.613661	0.721348	0.785281	0.894346	0.995164	1.16638	1.24023	1.44635	1.66395	1.88907	2.33252	2.67155	3.87462	14.5166
0	0.0505325	0.102718	0.149272	0.19305	0.246338	0.264584	0.311616	0.367716	0.418197	0.480715	0.526493	0.615377	0.721546	0.78551	0.894346	0.995502	1.16682	1.24023	1.44635	1.66674	1.89068	2.33898	2.67155	3.88215	14.5166
0	0.0505524	0.103151	0.149733	0.193194	0.246428	0.265406	0.311896	0.367845	0.418207	0.481012	0.526675	0.616238	0.72165	0.785756	0.894346	0.997074	1.16852	1.24023	1.44635	1.67335	1.89091	2.34007	2.67155	3.88497	14.5166
0	0.0510767	0.103315	0.150567	0.193229	0.246541	0.266008	0.311973	0.367872	0.418267	0.481215	0.526704	0.617393	0.722103	0.785818	0.894346	1.00163	1.16965	1.24023	1.44635	1.67342	1.89209	2.34007	2.67155	3.88784	14.8601
0	0.051105	0.103456	0.150579	0.193266	0.246832	0.266607	0.311999	0.368027	0.418788	0.481262	0.526986	0.617519	0.724059	0.78588	0.894346	1.00188	1.17157	1.24023	1.44635	1.67772	1.89617	2.34007	2.69841	3.90192	14.9344
0	0.0512026	0.103542	0.15065	0.193359	0.247204	0.267073	0.312326	0.368392	0.418955	0.482514	0.52738	0.618963	0.724877	0.787503	0.896274	1.00339	1.1718	1.24023	1.44635	1.68039	1.89675	2.34007	2.71919	3.92197	15.4846
0	0.051371	0.103596	0.150712	0.193445	0.247301	0.267103	0.31298	0.36881	0.419286	0.482627	0.528032	0.618982	0.725614	0.787665	0.896841	1.0035	1.17286	1.24023	1.44635	1.68106	1.90637	2.34007	2.72649	3.92197	15.6898
0	0.0514965	0.104398	0.150835	0.193777	0.2474	0.267285	0.31381	0.368995	0.419498	0.483848	0.528159	0.619251	0.727272	0.789326	0.897318	1.00523	1.17572	1.24266	1.44635	1.68257	1.90693	2.34007	2.75115	3.92197	15.7837
0	0.0515281	0.104552	0.151407	0.194167	0.248047	0.267342	0.31382	0.369825	0.419558	0.483959	0.528321	0.619707	0.72742	0.790222	0.89804	1.00638	1.17882	1.24862	1.44635	1.68783	1.91292	2.34007	2.75194	3.92824	15.8012
0	0.0520108	0.1047	0.152074	0.194843	0.248047	0.268191	0.314232	0.370232	0.419612	0.484146	0.528557	0.620189	0.729975	0.791125	0.898396	1.00676	1.18283	1.24876	1.44706	1.69625	1.91318	2.34007	2.76879	3.93151	15.962
0	0.0522564	0.10491	0.152099	0.195309	0.248047	0.268627	0.31441	0.370472	0.420668	0.485295	0.530846	0.620708	0.730698	0.794026	0.901772	1.00677	1.18316	1.25128	1.45046	1.69973	1.91424	2.34007	2.77325	3.93194	16.1707
0	0.0523141	0.104917	0.152172	0.195394	0.248047	0.26876	0.314522	0.371618	0.421161	0.485329	0.531443	0.622386	0.730887	0.794279	0.901943	1.00748	1.18372	1.25276	1.4512	1.70054	1.92059	2.34007	2.77325	3.95207	16.2504
0	0.0524327	0.104927	0.152207	0.195515	0.248047	0.268807	0.314685	0.372543	0.421759	0.485874	0.532656	0.623038	0.731752	0.794497	0.902157	1.00846	1.18408	1.25664	1.45902	1.70315	1.92181	2.34007	2.77325	3.96431	16.3127
0	0.0524772	0.105204	0.152282	0.195643	0.248047	0.269144	0.315122	0.372642	0.423813	0.486227	0.532992	0.62359	0.73355	0.797734	0.908194	1.00902	1.18436	1.25701	1.45998	1.70392	1.92686	2.34007	2.77325	3.96764	16.3579
0	0.0526847	0.10542	0.152407	0.195697	0.248047	0.269172	0.315204	0.373032	0.424112	0.486422	0.533137	0.62411	0.735456	0.799306	0.908312	1.0095	1.18516	1.26058	1.46086	1.71245	1.92857	2.34007	2.77325	3.9763	16.669
0	0.0529497	0.105423	0.15281	0.195796	0.248047	0.269765	0.315405	0.373125	0.424427	0.487291	0.533686	0.62426	0.737421	0.801488	0.908562	1.01079	1.18554	1.26414	1.46313	1.71399	1.93731	2.3446	2.77325	3.98158	16.6764
0	0.0533019	0.105423	0.152947	0.196128	0.248047	0.270201	0.315796	0.373239	0.424589	0.489258	0.533899	0.624454	0.738198	0.801639	0.908734	1.0114	1.18633	1.2648	1.46896	1.72386	1.93731	2.3524	2.77325	3.99964	16.8909
0	0.0534321	0.105431	0.153016	0.196352	0.248047	0.270242	0.316091	0.374042	0.424721	0.489342	0.534355	0.625538	0.738228	0.801822	0.910448	1.01949	1.18983	1.2648	1.4709	1.72442	1.93731	2.35318	2.77325	4.00524	16.9327
0	0.0534512	0.105969	0.153158	0.196377	0.248047	0.270431	0.316928	0.374171	0.424921	0.49059	0.534899	0.625607	0.739486	0.802247	0.910601	1.021	1.19226	1.2648	1.47674	1.7252	1.93731	2.35318	2.77325	4.0069	17.4164
0	0.0534765	0.106045	0.153167	0.19645	0.248047	0.270634	0.317146	0.37488	0.425252	0.490639	0.53527	0.627503	0.741351	0.80409	0.911306	1.02172	1.19231	1.2648	1.47784	1.72676	1.93731	2.35318	2.77325	4.00922	17.4446
0	0.0534892	0.10606	0.153279	0.196877	0.248047	0.271455	0.317363	0.375101	0.425537	0.490839	0.535386	0.628169	0.741995	0.804845	0.911705	1.02238	1.1929	1.2648	1.47904	1.73151	1.93731	2.35358	2.77325	4.0198	17.4851
0	0.0535461	0.106129	0.153351	0.197131	0.248047	0.271604	0.317406	0.375451	0.425747	0.491316	0.536002	0.63055	0.743815	0.806878	0.913169	1.02272	1.19398	1.2648	1.48167	1.73335	1.93731	2.36985	2.77325	4.03791	17.8749
0	0.0535955	0.106174	0.153439	0.19716	0.248047	0.271677	0.31775	0.375514	0.425988	0.491593	0.5363	0.633873	0.744141	0.807653	0.914176	1.02272	1.19414	1.2648	1.48216	1.7339	1.93731	2.38106	2.77325	4.04882	18.231
0	0.0539723	0.106629	0.15353	0.197526	0.248047	0.271829	0.31779	0.376047	0.426476	0.492094	0.53689	0.634686	0.744141	0.80791	0.914891	1.02272	1.19554	1.2648	1.48489	1.73465	1.94359	2.38716	2.77325	4.05846	18.6448
0	0.0540002	0.106714	0.153766	0.197762	0.248047	0.272041	0.317977	0.376295	0.426566	0.492693	0.538207	0.638165	0.744141	0.808742	0.917187	1.02272	1.19722	1.2648	1.48741	1.73633	1.94458	2.39157	2.77325	4.06658	18.8662
0	0.0540174	0.106994	0.153834	0.198384	0.248047	0.272174	0.31837	0.376661	0.427194	0.49294	0.538588	0.639376	0.744141	0.810322	0.917823	1.02272	1.20096	1.2648	1.48828	1.73633	1.94524	2.40933	2.77325	4.09089	18.9719
0	0.054218	0.107035	0.153855	0.198415	0.248047	0.272772	0.319137	0.376788	0.428224	0.494025	0.539439	0.640043	0.744141	0.810661	0.917981	1.02484	1.20124	1.2648	1.48828	1.73633	1.95676	2.41045	2.77325	4.10254	18.9881
0	0.0546562	0.107055	0.153892	0.198475	0.248047	0.272854	0.319711	0.377073	0.42824	0.49503	0.539541	0.641625	0.744141	0.811228	0.918689	1.02624	1.2049	1.2648	1.48828	1.73633	1.9591	2.41261	2.77325	4.11186	19.1189
0	0.0547712	0.107068	0.1541	0.198847	0.248047	0.272915	0.320169	0.378043	0.428259	0.495078	0.540577	0.646026	0.744141	0.811529	0.919268	1.02667	1.20684	1.2648	1.48828	1.73633	1.96202	2.41294	2.77325	4.11458	19.1254
0	0.0548932	0.107132	0.154245	0.198867	0.248047	0.273016	0.320481	0.378057	0.428305	0.495303	0.542245	0.64707	0.744141	0.811889	0.924946	1.02733	1.20949	1.26896	1.48828	1.73666	1.96544	2.41561	2.77325	4.12291	19.1495
0	0.054911	0.107168	0.154356	0.19887	0.248047	0.273847	0.321262	0.378828	0.428473	0.495635	0.5424	0.64842	0.744141	0.812472	0.925227	1.03052	1.21005	1.27682	1.48828	1.73852	1.9655	2.42099	2.77325	4.12353	19.4064
0	0.0554124	0.107176	0.154669	0.198922	0.248047	0.273895	0.321346	0.379061	0.428592	0.495917	0.542697	0.649224	0.744141	0.812477	0.927126	1.032	1.2125	1.27919	1.48828	1.73902	1.96672	2.4232	2.77325	4.12435	19.6098
0	0.0559405	0.107289	0.154814	0.199734	0.248047	0.273916	0.321414	0.379079	0.428953	0.496094	0.545683	0.650398	0.744141	0.813639	0.927479	1.03239	1.21255	1.2801	1.48828	1.74382	1.96735	2.43152	2.78336	4.13254	19.6568
0	0.0560204	0.107346	0.155585	0.200008	0.248047	0.274	0.322022	0.379785	0.428971	0.496094	0.547303	0.650612	0.744141	0.815415	0.928726	1.03334	1.21317	1.28117	1.48828	1.74891	1.9674	2.43339	2.79228	4.14197	20.2078
0	0.0560895	0.107643	0.155798	0.200062	0.248047	0.274792	0.322263	0.379813	0.429179	0.496094	0.547556	0.651454	0.744141	0.815959	0.92887	1.03396	1.21399	1.28594	1.48985	1.74914	1.96781	2.43479	2.82225	4.14414	20.5894
0	0.0561469	0.107782	0.156104	0.200066	0.248047	0.274965	0.322897	0.380243	0.429266	0.496094	0.547617	0.652774	0.744141	0.816246	0.928893	1.03507	1.21455	1.28618	1.49176	1.74975	1.97015	2.43642	2.82817	4.15097	20.7234
0	0.0562416	0.107985	0.156185	0.200105	0.248047	0.275064	0.322949	0.381061	0.429592	0.496094	0.547675	0.653514	0.744141	0.818697	0.929	1.03599	1.21621	1.28998	1.49514	1.75105	1.9734	2.44298	2.85014	4.15224	21.0592
0	0.0564777	0.108014	0.156235	0.200152	0.248047	0.275796	0.323236	0.381393	0.429798	0.496094	0.548104	0.654031	0.744141	0.819042	0.929338	1.03647	1.21765	1.29076	1.49604	1.75396	1.98438	2.44298	2.85215	4.15802	21.2641
0	0.0565634	0.108158	0.156349	0.200233	0.248047	0.276505	0.32376	0.381452	0.430191	0.496094	0.548218	0.654644	0.744141	0.819284	0.930134	1.0391	1.21803	1.29151	1.49984	1.75396	1.98438	2.44298	2.86886	4.16054	21.3983
0	0.0566398	0.108802	0.156428	0.201154	0.248047	0.276699	0.323835	0.381604	0.43037	0.496094	0.549127	0.65497	0.744141	0.819417	0.930501	1.04082	1.22023	1.29244	1.50303	1.75396	1.98438	2.44434	2.86996	4.17546	21.6029
0	0.0570811	0.108839	0.156444	0.201163	0.248047	0.277066	0.324004	0.381888	0.430387	0.496094	0.551502	0.656461	0.744141	0.820541	0.93256	1.04121	1.22258	1.29336	1.5048	1.75396	1.98438	2.45458	2.87197	4.19007	21.9588
0	0.0572	0.108928	0.156519	0.201342	0.248047	0.277072	0.324232	0.382299	0.430775	0.496094	0.552602	0.657555	0.744141	0.820893	0.932899	1.04398	1.22342	1.29487	1.50812	1.75396	1.98438	2.45554	2.87492	4.2121	22.4534
0	0.0579343	0.109275	0.156865	0.20135	0.248047	0.277244	0.324526	0.382335	0.430918	0.496094	0.552988	0.65806	0.744141	0.821024	0.933617	1.04537	1.22674	1.29683	1.50881	1.75396	1.9894	2.45959	2.88045	4.23459	22.6267
0	0.0579593	0.109316	0.157028	0.201381	0.248047	0.277551	0.324604	0.383299	0.431052	0.496094	0.55465	0.658239	0.744141	0.823383	0.933742	1.04561	1.2307	1.30136	1.50881	1.75396	1.99227	2.46966	2.8862	4.24411	22.7785
0	0.0581468	0.109369	0.157089	0.201825	0.248047	0.278011	0.324627	0.384003	0.432372	0.496094	0.55465	0.658487	0.744141	0.825386	0.933754	1.04619	1.23078	1.30238	1.50881	1.75396	1.99566	2.47169	2.88963	4.24588	22.8648
0	0.0582547	0.109455	0.157152	0.202372	0.248047	0.278444	0.325092	0.384012	0.432485	0.496094	0.55465	0.659099	0.744141	0.827281	0.934624	1.04654	1.23249	1.30291	1.50881	1.75396	1.99762	2.47418	2.8927	4.26555	23.1549
0	0.0583496	0.109746	0.158398	0.202591	0.248047	0.279296	0.325527	0.384067	0.43315	0.496094	0.55465	0.659165	0.744141	0.827946	0.9358	1.04935	1.23865	1.30804	1.50881	1.75396	1.99837	2.47528	2.8927	4.26686	23.3217
0	0.058375	0.109817	0.158424	0.202654	0.248047	0.279471	0.325786	0.384095	0.433868	0.496094	0.55465	0.65974	0.744141	0.829344	0.936038	1.05042	1.24023	1.30856	1.50881	1.75396	1.99982	2.47646	2.8927	4.27039	24.0196
0	0.0584408	0.109959	0.158643	0.203552	0.248047	0.279526	0.326407	0.384447	0.434701	0.496094	0.55465	0.660308	0.744141	0.830803	0.936605	1.0521	1.24023	1.30977	1.50881	1.75396	1.99982	2.4799	2.8927	4.28952	24.0298
0	0.0586745	0.110021	0.158713	0.203601	0.248047	0.279745	0.326716	0.38464	0.434903	0.496094	0.55465	0.661582	0.744141	0.831844	0.940261	1.05237	1.24023	1.31526	1.50881	1.75396	1.99982	2.48047	2.8927	4.29057	24.183
0	0.0588002	0.110088	0.158766	0.203897	0.248047	0.27983	0.326783	0.384889	0.435159	0.496094	0.55465	0.663266	0.744141	0.832904	0.941146	1.05237	1.24023	1.31885	1.50881	1.75396	1.99982	2.48047	2.89557	4.29594	24.9086
0	0.0589456	0.110682	0.158783	0.203897	0.248047	0.280006	0.326935	0.384943	0.435185	0.496094	0.55465	0.664033	0.744141	0.833044	0.944113	1.05237	1.24023	1.32302	1.50881	1.75396	1.99982	2.48047	2.89801	4.32932	25.2667
0	0.0589614	0.111267	0.158869	0.204528	0.248047	0.280072	0.327194	0.385044	0.435304	0.496094	0.55465	0.664214	0.744141	0.833804	0.947324	1.05237	1.24023	1.32356	1.50881	1.75396	1.99982	2.48047	2.90022	4.33195	25.7216
0	0.0589614	0.111314	0.158922	0.20469	0.248047	0.280214	0.3275	0.38602	0.43543	0.496094	0.55465	0.665305	0.744141	0.834089	0.947508	1.05372	1.24023	1.32417	1.50881	1.75396	1.99982	2.48047	2.91339	4.33444	26.1204
0	0.0590285	0.11136	0.158923	0.204709	0.248047	0.280235	0.3275	0.386049	0.436399	0.496094	0.55465	0.666581	0.746405	0.835923	0.947665	1.054	1.24023	1.32474	1.50881	1.75396	1.99982	2.48047	2.92034	4.36507	28.1301
0	0.0590494	0.111455	0.159578	0.205268	0.248047	0.280449	0.328543	0.386069	0.436922	0.496094	0.55465	0.667048	0.747531	0.837087	0.949348	1.05634	1.24023	1.32486	1.50881	1.75396	1.99982	2.48047	2.92334	4.36656	28.2752
0	0.0590833	0.111624	0.159744	0.20538	0.248047	0.280522	0.328691	0.386471	0.436929	0.496094	0.55465	0.66888	0.748341	0.837627	0.949951	1.05953	1.24023	1.32614	1.50881	1.75396	2.00991	2.48047	2.9495	4.3785	28.5523
0	0.0591004	0.111734	0.159833	0.205458	0.248047	0.281385	0.328884	0.386495	0.437093	0.496094	0.55465	0.669281	0.750433	0.838955	0.950836	1.06047	1.24023	1.32627	1.51011	1.75396	2.01793	2.48047	2.94996	4.38179	29.0045
0	0.0591301	0.111901	0.159841	0.205554	0.248047	0.282069	0.329545	0.386635	0.437964	0.496094	0.55465	0.669542	0.751125	0.839543	0.951542	1.06103	1.24023	1.33194	1.51127	1.75396	2.03505	2.48047	2.95373	4.39321	29.3168
0	0.059311	0.111934	0.159872	0.205612	0.248047	0.282141	0.329692	0.386699	0.438003	0.496094	0.55465	0.670902	0.753405	0.840966	0.95251	1.06271	1.24023	1.33442	1.51132	1.75396	2.03656	2.48047	2.96452	4.4372	29.3462
0	0.0596152	0.112454	0.159899	0.205702	0.248047	0.282562	0.330387	0.386745	0.43803	0.496094	0.55465	0.672367	0.753662	0.841481	0.952982	1.06416	1.24023	1.33577	1.51644	1.75396	2.03837	2.48047	2.98688	4.46484	29.6465
0	0.0599894	0.112555	0.160022	0.205913	0.248047	0.282971	0.330707	0.386932	0.438253	0.496094	0.55465	0.674488	0.755291	0.84196	0.953031	1.06579	1.24023	1.33577	1.51679	1.75396	2.03887	2.48047	2.98688	4.47173	32.0134
0	0.0601642	0.112618	0.160066	0.206265	0.248047	0.283231	0.331737	0.387224	0.438532	0.496094	0.554901	0.674623	0.75532	0.842709	0.954458	1.06791	1.24023	1.33577	1.52178	1.75396	2.04545	2.48047	2.98819	4.47173	32.2136
0	0.0605204	0.112652	0.160284	0.206432	0.248047	0.283521	0.331951	0.387396	0.43897	0.496094	0.55538	0.675287	0.755488	0.843605	0.954771	1.06874	1.24023	1.33577	1.52277	1.75396	2.04545	2.48047	2.99691	4.47173	32.46
0	0.060621	0.112716	0.160322	0.207455	0.248047	0.283656	0.332153	0.387402	0.438997	0.496094	0.555417	0.675465	0.755841	0.844097	0.955378	1.0702	1.24023	1.33577	1.52284	1.75396	2.04545	2.48047	2.99716	4.47173	32.4894
0	0.0606454	0.112883	0.160367	0.207561	0.248047	0.283773	0.33256	0.387887	0.439405	0.496094	0.555592	0.678519	0.756488	0.84471	0.95755	1.07053	1.24023	1.33577	1.52735	1.75396	2.04545	2.48047	2.99716	4.47173	32.4941
0	0.0606566	0.113151	0.160515	0.208041	0.248047	0.283814	0.333196	0.387937	0.439774	0.496094	0.556186	0.678984	0.75656	0.844768	0.957632	1.07685	1.24023	1.33577	1.53656	1.75396	2.04545	2.48047	3.00698	4.47173	32.7356
0	0.0608094	0.113288	0.160552	0.208181	0.248047	0.284435	0.333735	0.38794	0.439897	0.496094	0.556309	0.680391	0.758441	0.844799	0.958688	1.07833	1.24023	1.33577	1.54481	1.75396	2.04545	2.48047	3.01627	4.47672	32.9986
0	0.0608116	0.11346	0.161115	0.208793	0.248047	0.284793	0.333869	0.388354	0.439971	0.496094	0.556669	0.680594	0.758713	0.849474	0.96113	1.0795	1.24023	1.33577	1.5485	1.75396	2.04545	2.48047	3.02103	4.47961	33.2586
0	0.0614827	0.113778	0.161195	0.208916	0.248047	0.28489	0.334218	0.388733	0.440089	0.496094	0.55682	0.680606	0.758935	0.850892	0.962381	1.08076	1.24023	1.33577	1.54928	1.75396	2.04545	2.48047	3.02543	4.57962	33.5451
0	0.0616435	0.113962	0.161287	0.20894	0.248047	0.285416	0.334279	0.388824	0.440597	0.496094	0.558961	0.680834	0.75898	0.852099	0.962567	1.08249	1.24023	1.33577	1.55329	1.75396	2.04545	2.48047	3.0278	4.63238	33.6659
0	0.0617816	0.114169	0.16148	0.209048	0.248047	0.285678	0.334389	0.389197	0.44086	0.496094	0.55976	0.681762	0.759763	0.852298	0.962749	1.08342	1.24023	1.33577	1.55731	1.75396	2.05175	2.48047	3.0278	4.66038	33.7827
0	0.0618971	0.114627	0.161947	0.20957	0.248047	0.285772	0.334612	0.389508	0.44128	0.496094	0.563135	0.68233	0.760314	0.85231	0.962757	1.08345	1.24023	1.33577	1.56294	1.75396	2.06601	2.48047	3.0278	4.68014	34.5204
0	0.0619627	0.114695	0.161961	0.209741	0.248047	0.286272	0.335038	0.390581	0.441581	0.496094	0.563226	0.682861	0.761364	0.855212	0.962843	1.08368	1.24023	1.33577	1.56389	1.75396	2.06659	2.48047	3.0278	4.68014	35.179
0	0.062632	0.114861	0.162056	0.209851	0.248047	0.286334	0.336319	0.391642	0.441616	0.496094	0.564175	0.683832	0.762044	0.855659	0.964283	1.08546	1.24023	1.33577	1.56476	1.75396	2.07346	2.49284	3.0278	4.71782	35.1991
0	0.0627576	0.114972	0.162685	0.209931	0.248047	0.286609	0.336668	0.392157	0.441938	0.496094	0.564932	0.684311	0.76241	0.858585	0.965607	1.0873	1.24023	1.33577	1.56751	1.75396	2.07997	2.49284	3.0278	4.75626	35.5954
0	0.0627619	0.115104	0.162858	0.210299	0.248047	0.286819	0.336747	0.392476	0.442419	0.496094	0.566057	0.685017	0.763255	0.859129	0.967195	1.08864	1.24023	1.33577	1.56879	1.75396	2.09803	2.49284	3.033	4.76482	36.0087
0	0.0629185	0.115276	0.162915	0.210324	0.248047	0.286912	0.336813	0.392891	0.442832	0.496094	0.567726	0.686024	0.767562	0.859496	0.967671	1.09063	1.24023	1.33728	1.56879	1.75396	2.09837	2.49284	3.03776	4.77111	36.7185
0	0.0629516	0.115306	0.163094	0.210351	0.248047	0.287326	0.336906	0.39323	0.443382	0.496094	0.568256	0.686398	0.767715	0.859506	0.969361	1.09096	1.24023	1.34267	1.56879	1.7545	2.1022	2.49284	3.06108	4.82076	37.4584
0	0.0629516	0.115313	0.163324	0.21052	0.248047	0.28783	0.338362	0.393289	0.443437	0.496094	0.568286	0.687548	0.76822	0.86012	0.971081	1.09196	1.24023	1.34369	1.56879	1.7557	2.10475	2.49284	3.06796	4.82568	38.4865
0	0.0629713	0.11536	0.163485	0.210541	0.248047	0.288263	0.338395	0.394205	0.443581	0.496094	0.568548	0.689407	0.768422	0.860759	0.972561	1.09558	1.24023	1.34636	1.56879	1.75738	2.10497	2.49284	3.0796	4.83026	39.6138
0	0.063235	0.115504	0.16363	0.210582	0.248047	0.289014	0.338875	0.394342	0.443733	0.496094	0.56921	0.689754	0.772042	0.8616	0.973965	1.09656	1.24023	1.35362	1.56879	1.75805	2.10976	2.49284	3.08968	4.85185	39.8615
0	0.0633647	0.115534	0.163667	0.210628	0.248047	0.28926	0.33924	0.39442	0.444192	0.496094	0.569589	0.692503	0.772101	0.862056	0.975281	1.0995	1.24023	1.35562	1.56979	1.75808	2.11022	2.49284	3.09109	4.88596	39.924
0	0.0633924	0.11561	0.163675	0.211088	0.248047	0.28934	0.339268	0.394583	0.444379	0.496094	0.569786	0.693078	0.772218	0.865757	0.975426	1.09984	1.24023	1.35582	1.57083	1.76216	2.11931	2.49284	3.09242	4.88726	39.9733
0	0.0634089	0.115689	0.163848	0.211376	0.248047	0.289602	0.339587	0.394607	0.445094	0.496094	0.571047	0.693641	0.774298	0.866521	0.975776	1.10018	1.24023	1.35707	1.57169	1.76458	2.11931	2.49311	3.09538	4.89078	40.626
0	0.0637578	0.115983	0.164479	0.211405	0.248047	0.290602	0.339955	0.394796	0.445737	0.496094	0.571169	0.693857	0.774748	0.866946	0.975897	1.10275	1.24023	1.36882	1.57254	1.76645	2.11931	2.49593	3.09989	4.89225	40.7167
0	0.0638522	0.115988	0.16458	0.211445	0.248047	0.290937	0.340198	0.395017	0.445873	0.496094	0.572082	0.694121	0.774841	0.87002	0.976977	1.10276	1.24023	1.37042	1.57257	1.77342	2.11931	2.49753	3.10492	4.89225	41.9661
0	0.0643553	0.116443	0.164705	0.211578	0.248047	0.291498	0.340691	0.39504	0.445909	0.496094	0.572169	0.695385	0.775168	0.874323	0.977497	1.10446	1.24023	1.37326	1.57317	1.77444	2.11931	2.49983	3.10802	4.89225	42.4283
0	0.0646747	0.116447	0.16499	0.211729	0.248047	0.291812	0.34078	0.396145	0.446059	0.496094	0.572312	0.696842	0.775332	0.874872	0.978316	1.10579	1.24023	1.37735	1.57382	1.78012	2.11931	2.50857	3.13324	4.89541	43.0124
0	0.0648932	0.116687	0.165119	0.212362	0.248047	0.291831	0.340877	0.396183	0.446088	0.496094	0.572507	0.696953	0.776361	0.876254	0.978566	1.1093	1.24023	1.38511	1.58076	1.78175	2.12303	2.51216	3.13757	4.91881	43.411
0	0.0649911	0.117051	0.165175	0.21271	0.248047	0.29218	0.342383	0.396524	0.446143	0.496094	0.573833	0.698436	0.776638	0.878962	0.979341	1.1093	1.24023	1.3864	1.58397	1.78681	2.12911	2.51692	3.13757	4.9423	43.9043
0	0.0650689	0.117063	0.165306	0.212727	0.248047	0.292245	0.342658	0.39659	0.446243	0.496094	0.574486	0.699295	0.777728	0.879134	0.980434	1.1093	1.24023	1.38658	1.58576	1.78869	2.13241	2.51968	3.15712	4.98256	44.372
0	0.0652891	0.117269	0.165635	0.212806	0.248047	0.292558	0.342756	0.396817	0.446653	0.496094	0.574942	0.699607	0.777881	0.879426	0.981122	1.1093	1.24023	1.387	1.58667	1.78869	2.13248	2.52314	3.1764	5.01812	44.6994
0	0.0652982	0.1175	0.166188	0.212917	0.248047	0.292608	0.34301	0.39727	0.44689	0.496628	0.575768	0.700833	0.778081	0.880408	0.981539	1.1093	1.24023	1.38729	1.58827	1.78869	2.13378	2.52429	3.17655	5.0385	45.5684
0	0.0655042	0.117504	0.16639	0.21313	0.248047	0.292635	0.343624	0.398789	0.447143	0.496972	0.576748	0.701583	0.779061	0.880774	0.981577	1.1093	1.24023	1.39005	1.58827	1.78869	2.13378	2.52597	3.17655	5.0895	45.9094
0	0.0655103	0.117529	0.166488	0.213586	0.248047	0.292713	0.343923	0.398891	0.447381	0.497184	0.577009	0.701583	0.779331	0.882366	0.98174	1.1093	1.24023	1.39055	1.58827	1.78869	2.13378	2.52672	3.17655	5.0895	45.9931
0	0.0655691	0.118	0.166536	0.213826	0.248047	0.292974	0.344029	0.398902	0.447749	0.497219	0.577497	0.701583	0.780341	0.882714	0.983797	1.11013	1.24023	1.39208	1.58827	1.79669	2.13378	2.52959	3.17655	5.1076	46.3795
0	0.0656198	0.118111	0.167678	0.213869	0.248047	0.293703	0.344726	0.3997	0.447923	0.497227	0.577684	0.701583	0.780771	0.882862	0.985139	1.1105	1.24023	1.39316	1.58827	1.7971	2.13378	2.52959	3.17655	5.1076	46.4954
0	0.0658577	0.118333	0.167717	0.2139	0.248047	0.29445	0.345236	0.400515	0.448282	0.497252	0.577716	0.701583	0.784009	0.884966	0.985502	1.11131	1.24023	1.39613	1.58827	1.79774	2.13378	2.52959	3.17655	5.1076	47.2957
0	0.0660165	0.118385	0.167797	0.214015	0.248047	0.294931	0.345257	0.40058	0.448308	0.497407	0.579151	0.702857	0.784393	0.886051	0.986977	1.11181	1.24023	1.40207	1.58827	1.79824	2.13378	2.52959	3.18857	5.13712	47.5901
0	0.0660444	0.118682	0.168104	0.214191	0.248047	0.294983	0.345602	0.401455	0.449399	0.497557	0.579745	0.70365	0.784393	0.887122	0.987587	1.11201	1.24023	1.40317	1.58827	1.7991	2.13378	2.52959	3.19876	5.14688	47.6024
0	0.0663581	0.118772	0.168126	0.21435	0.248047	0.29605	0.345719	0.401964	0.449674	0.497804	0.581536	0.704885	0.784393	0.887234	0.988255	1.11882	1.24023	1.40317	1.58827	1.79966	2.13378	2.52959	3.22461	5.14776	47.6773
0	0.0665145	0.118793	0.168248	0.214355	0.248047	0.296915	0.346472	0.402252	0.450415	0.498301	0.581687	0.705156	0.784393	0.887258	0.989348	1.11994	1.24023	1.40317	1.58827	1.79993	2.13378	2.52959	3.22461	5.20726	47.7514
0	0.0665511	0.118862	0.168395	0.214483	0.248047	0.297745	0.346515	0.402695	0.450678	0.498509	0.582221	0.707369	0.784393	0.88882	0.98947	1.12132	1.24023	1.406	1.58827	1.80042	2.13378	2.52959	3.22946	5.25721	48.0789
0	0.0667339	0.118943	0.16867	0.214501	0.248047	0.298067	0.346652	0.402872	0.450751	0.498712	0.582914	0.707634	0.784393	0.889197	0.989501	1.12185	1.24023	1.40731	1.58827	1.80099	2.1376	2.52959	3.23414	5.26131	48.273
0	0.0668764	0.118987	0.1687	0.214618	0.248047	0.299363	0.34666	0.40331	0.451251	0.498867	0.583345	0.708399	0.784393	0.889234	0.989611	1.12499	1.24023	1.40751	1.58827	1.80192	2.13997	2.53901	3.23414	5.26187	48.42
0	0.0670901	0.119247	0.168759	0.215035	0.248047	0.299452	0.34666	0.403888	0.451462	0.499989	0.583367	0.708789	0.784393	0.889831	0.991174	1.1282	1.24023	1.40926	1.58827	1.80581	2.15006	2.54704	3.23414	5.31489	48.6229
0	0.0671998	0.119316	0.168795	0.215473	0.248047	0.300415	0.347517	0.40393	0.451801	0.500148	0.583869	0.710116	0.784393	0.890244	0.992188	1.12967	1.24023	1.41653	1.58827	1.80581	2.1568	2.5512	3.24482	5.32579	48.9885
0	0.0673659	0.119645	0.169089	0.215498	0.248047	0.300757	0.347606	0.404015	0.452218	0.500326	0.586937	0.711199	0.784393	0.891022	0.992188	1.13124	1.24023	1.41977	1.59125	1.80581	2.15964	2.5538	3.24888	5.33365	49.3919
0	0.067571	0.11974	0.169328	0.215663	0.248047	0.301494	0.347928	0.404146	0.452429	0.501658	0.58698	0.711542	0.784393	0.891306	0.992188	1.13247	1.24023	1.42272	1.59391	1.80581	2.16455	2.5538	3.26255	5.42409	49.808
0	0.0678573	0.119858	0.169434	0.215801	0.248047	0.301497	0.348072	0.404351	0.452613	0.501715	0.588486	0.712419	0.784393	0.891968	0.992188	1.13406	1.24023	1.4241	1.59422	1.80581	2.17437	2.5538	3.26255	5.46337	49.8599
0	0.067921	0.119896	0.169579	0.215842	0.248047	0.302113	0.348803	0.405065	0.453921	0.501838	0.588622	0.712859	0.784393	0.892024	0.992188	1.1344	1.24023	1.42561	1.59566	1.80581	2.17815	2.5538	3.27169	5.5465	50.1447
0	0.0681255	0.120539	0.169692	0.216012	0.248047	0.302324	0.348956	0.405255	0.45421	0.50241	0.588903	0.713229	0.784393	0.892436	0.992188	1.13498	1.24023	1.42764	1.6003	1.80581	2.1784	2.5538	3.27254	5.5465	50.6793
0	0.0681697	0.120706	0.169768	0.216054	0.248047	0.302769	0.349347	0.4056	0.455152	0.502727	0.589518	0.713799	0.786189	0.892623	0.992188	1.13593	1.24023	1.42827	1.60605	1.80581	2.1806	2.5538	3.28535	5.61266	50.7988
0	0.0683194	0.120952	0.16977	0.216659	0.248047	0.302855	0.350185	0.406086	0.455414	0.502729	0.590149	0.713907	0.786311	0.894346	0.992188	1.14629	1.24023	1.42971	1.60931	1.80585	2.18937	2.5538	3.30936	5.73369	50.852
0	0.0683531	0.121185	0.169891	0.216999	0.248047	0.3031	0.350791	0.406576	0.455513	0.504244	0.59146	0.713975	0.786312	0.894346	0.992188	1.14905	1.24023	1.43009	1.61446	1.80621	2.18965	2.5538	3.33713	5.94702	51.4415
0	0.0684359	0.121804	0.170015	0.217056	0.248047	0.303223	0.350791	0.406751	0.455952	0.505818	0.592086	0.715065	0.786686	0.894346	0.992188	1.1505	1.24023	1.43241	1.61477	1.80733	2.20142	2.5538	3.33713	5.95884	51.6033
0	0.0685908	0.121896	0.170073	0.217171	0.248047	0.303447	0.350791	0.407611	0.45627	0.506216	0.59233	0.715218	0.789513	0.894346	0.992188	1.15265	1.24023	1.43269	1.61843	1.8078	2.20218	2.5538	3.33713	6.07115	52.14
0	0.0686334	0.121993	0.170123	0.217831	0.248047	0.303525	0.350791	0.407706	0.456429	0.506681	0.592747	0.716076	0.790106	0.894346	0.992188	1.15405	1.24023	1.4334	1.61979	1.80782	2.20521	2.5538	3.33713	6.14135	52.1406
0	0.0688473	0.122363	0.170533	0.218764	0.248047	0.303668	0.350791	0.408237	0.456448	0.507252	0.593307	0.716197	0.790423	0.894346	0.992188	1.15614	1.24023	1.43622	1.62017	1.80818	2.20981	2.5538	3.33713	6.50228	52.676
0	0.0689937	0.122448	0.170691	0.219033	0.248047	0.303697	0.350791	0.409061	0.45651	0.507623	0.594932	0.717169	0.79108	0.894346	0.992188	1.15657	1.24023	1.43685	1.62253	1.81456	2.2186	2.5538	3.3481	6.51094	52.8549
0	0.0691446	0.12254	0.170745	0.219347	0.248047	0.303707	0.350791	0.409204	0.4568	0.509315	0.595011	0.718157	0.791366	0.894346	0.992188	1.15798	1.24023	1.441	1.625	1.82176	2.2186	2.56871	3.36104	6.67426	53.3301
0	0.0691452	0.122587	0.170922	0.219551	0.248047	0.303757	0.350791	0.409226	0.458076	0.509885	0.596154	0.718415	0.793439	0.894346	0.992188	1.15804	1.24023	1.44144	1.62741	1.82432	2.2186	2.57386	3.3741	6.81606	53.3387
0.000744141	0.0691666	0.122701	0.171019	0.21973	0.248047	0.303952	0.350791	0.409593	0.459112	0.509954	0.596547	0.718565	0.794424	0.894346	0.992188	1.15852	1.24023	1.44384	1.62981	1.82579	2.2186	2.579	3.38139	7.01583	53.3768
0.00244612	0.0691856	0.122972	0.17104	0.220159	0.248047	0.3042	0.350791	0.409748	0.459113	0.510637	0.596547	0.718787	0.794509	0.894346	0.992188	1.16176	1.24023	1.44635	1.63387	1.82594	2.23242	2.57958	3.3942	7.03739	54.1106
0.00372277	0.0693016	0.123038	0.171291	0.220441	0.248047	0.304406	0.350791	0.409841	0.459855	0.510734	0.596582	0.71902	0.794873	0.894346	0.992188	1.16346	1.24023	1.44635	1.63428	1.82743	2.23242	2.58139	3.41686	7.15906	54.1629
0.00391608	0.0693627	0.123143	0.171431	0.220566	0.248047	0.30522	0.350791	0.410139	0.460433	0.511278	0.598147	0.719476	0.795594	0.894891	0.992188	1.16402	1.24023	1.44635	1.63519	1.83046	2.23242	2.58969	3.44451	7.19336	54.5506
0.00449403	0.0694265	0.123204	0.171438	0.220587	0.248047	0.305972	0.350791	0.410522	0.461001	0.511302	0.599402	0.720355	0.795962	0.895961	0.992188	1.16561	1.24023	1.44635	1.63796	1.8323	2.23242	2.58969	3.44598	7.19336	55.1289
0.00482418	0.0694731	0.123287	0.171465	0.221104	0.248047	0.30609	0.350791	0.410529	0.461493	0.511694	0.599457	0.720776	0.796161	0.898507	0.992188	1.16685	1.24023	1.44635	1.63972	1.83373	2.23632	2.58969	3.45029	7.21045	55.3817
0.00510308	0.0695338	0.123511	0.171656	0.221569	0.248047	0.306308	0.350791	0.410971	0.463867	0.513169	0.600925	0.722298	0.796191	0.898952	0.992188	1.16752	1.24023	1.44635	1.64014	1.83553	2.24468	2.58969	3.45269	7.37496	55.8155
0.00615761	0.0696523	0.123663	0.171818	0.221659	0.248047	0.30699	0.350791	0.411224	0.464042	0.513195	0.603546	0.722352	0.796441	0.899545	0.992188	1.17055	1.24023	1.44635	1.64043	1.83697	2.24616	2.58969	3.45287	7.37496	56.2104
0.00753385	0.0696672	0.123666	0.172305	0.22222	0.248047	0.307647	0.350791	0.411294	0.464063	0.513386	0.60447	0.722975	0.796587	0.900073	0.992188	1.17078	1.24023	1.44635	1.6422	1.83995	2.24616	2.58969	3.4596	7.44723	56.4136
0.00868253	0.0697582	0.123708	0.172419	0.222416	0.248047	0.307743	0.350791	0.411429	0.464237	0.514103	0.605532	0.723848	0.797484	0.900271	0.992188	1.17097	1.24023	1.44635	1.64243	1.84715	2.24616	2.58969	3.46822	7.56035	56.9299
0.0090333	0.0698154	0.123816	0.172441	0.222671	0.248047	0.307772	0.350791	0.411444	0.464268	0.514446	0.607122	0.724872	0.798893	0.90068	0.992188	1.17393	1.24023	1.44635	1.64278	1.84731	2.24645	2.58969	3.4964	7.56035	57.2478
0.00930176	0.0700266	0.12405	0.172611	0.223178	0.248047	0.308468	0.350791	0.411855	0.464328	0.51468	0.607905	0.727243	0.799911	0.902113	0.992188	1.17447	1.24086	1.44635	1.64302	1.84946	2.24976	2.58969	3.49694	7.56035	57.6836
0.00930506	0.0702224	0.124262	0.172818	0.22327	0.248047	0.30872	0.350791	0.412173	0.464748	0.515072	0.608542	0.727414	0.800201	0.902748	0.992188	1.17512	1.24292	1.44635	1.64802	1.84952	2.26218	2.58969	3.50698	7.59678	58.3311
0.00986669	0.0702972	0.124424	0.173197	0.223357	0.248047	0.308962	0.350791	0.412372	0.465388	0.515206	0.610543	0.728767	0.800448	0.903209	0.992188	1.17741	1.2466	1.44635	1.65081	1.85141	2.26602	2.58969	3.50791	7.69345	58.4828
0.00992498	0.0703055	0.124479	0.173355	0.223367	0.248047	0.3092	0.350791	0.412571	0.46548	0.515423	0.611873	0.729155	0.801478	0.903546	0.992188	1.17803	1.24782	1.44635	1.65269	1.85266	2.26618	2.59001	3.50791	7.88634	58.6907
0.0102182	0.0704126	0.124882	0.173827	0.22341	0.248047	0.309208	0.351075	0.412667	0.465561	0.516201	0.612183	0.729376	0.801938	0.904058	0.992188	1.17832	1.25444	1.44635	1.65654	1.85417	2.27627	2.59028	3.50791	8.01464	59.619
0.0104364	0.0705135	0.124914	0.173864	0.223944	0.248047	0.309862	0.351246	0.41295	0.466883	0.516679	0.612249	0.731413	0.802587	0.904222	0.992188	1.18027	1.25513	1.44635	1.66119	1.85747	2.27678	2.60323	3.50791	8.11003	60.1257
0.0108249	0.0705711	0.124973	0.174098	0.223994	0.248047	0.309963	0.351927	0.412973	0.467019	0.517024	0.61324	0.731516	0.803309	0.904619	0.992188	1.18179	1.25836	1.44635	1.66149	1.85953	2.27688	2.60864	3.50791	8.21181	61.0599
0.0108759	0.0709661	0.125027	0.174098	0.223997	0.248047	0.310052	0.352229	0.413178	0.467051	0.517716	0.613495	0.731542	0.803685	0.904968	0.992188	1.1821	1.25951	1.44635	1.66395	1.8689	2.27881	2.61129	3.50791	8.31975	62.1846
0.0111683	0.0710095	0.125068	0.174162	0.224373	0.248047	0.310237	0.352597	0.413189	0.468528	0.518127	0.61381	0.731604	0.804106	0.905538	0.992188	1.18332	1.26058	1.44635	1.66395	1.87082	2.28688	2.61151	3.54449	8.31975	62.3605
0.0116905	0.0711996	0.125165	0.174426	0.224692	0.248047	0.310429	0.352822	0.413358	0.469057	0.519311	0.614079	0.731786	0.804699	0.906024	0.992188	1.18738	1.26181	1.44635	1.66395	1.87298	2.28688	2.61583	3.55007	8.31975	63.7794
0.0118681	0.0712811	0.125354	0.174434	0.224988	0.248047	0.310464	0.352928	0.413762	0.469771	0.519384	0.616288	0.731883	0.804838	0.906704	0.992188	1.18807	1.2648	1.44635	1.66482	1.87479	2.28688	2.6161	3.55149	8.31975	64.3633
0.011925	0.0713265	0.125411	0.174476	0.225292	0.248047	0.310496	0.353104	0.413826	0.470195	0.519393	0.616389	0.731986	0.807821	0.90702	0.995754	1.18828	1.2648	1.44635	1.67167	1.88113	2.28688	2.61717	3.55913	8.39306	66.9786
0.0120379	0.0713289	0.125419	0.174831	0.225608	0.248047	0.310633	0.353173	0.413888	0.470749	0.521526	0.618882	0.732958	0.808104	0.907289	0.996649	1.18913	1.2648	1.44821	1.6749	1.88329	2.28688	2.61824	3.56021	8.43724	67.147
0.0121239	0.0713501	0.126174	0.174973	0.225628	0.248047	0.310827	0.353955	0.414781	0.47087	0.522324	0.619693	0.733059	0.809099	0.908369	0.997486	1.18983	1.2648	1.4495	1.67616	1.88341	2.28688	2.63677	3.58584	8.54233	68.8914
0.0124451	0.0716148	0.126346	0.175019	0.225748	0.248047	0.311526	0.355829	0.415861	0.471074	0.523249	0.620274	0.7353	0.809286	0.909242	0.999785	1.19133	1.2648	1.45006	1.67852	1.88346	2.28688	2.63677	3.59702	8.55312	69.5779
0.012899	0.071782	0.126517	0.175108	0.225892	0.248047	0.311603	0.356139	0.415872	0.471779	0.524204	0.621792	0.735516	0.810805	0.909853	1.00057	1.19278	1.2648	1.45048	1.67905	1.88815	2.28689	2.64059	3.61314	8.5675	69.9765
0.0129413	0.071802	0.126548	0.175276	0.225985	0.248047	0.311736	0.357517	0.416001	0.472132	0.524212	0.622397	0.73585	0.810865	0.910367	1.00076	1.19368	1.2648	1.45056	1.68387	1.88907	2.29826	2.65155	3.61666	8.68168	70.4497
0.0132728	0.072349	0.126591	0.175716	0.226109	0.248047	0.311854	0.358359	0.416408	0.472555	0.524233	0.623037	0.736044	0.811984	0.910386	1.00249	1.19382	1.2648	1.4512	1.68551	1.88907	2.30285	2.67155	3.63382	8.70994	70.6625
0.0132728	0.0725062	0.127003	0.17611	0.226298	0.248047	0.312025	0.358872	0.417041	0.473262	0.524441	0.625805	0.736312	0.812272	0.912967	1.00451	1.1955	1.2648	1.4512	1.68873	1.88907	2.30298	2.67155	3.63875	8.76813	71.5657
0.0135003	0.0725377	0.127198	0.176609	0.226432	0.248047	0.312424	0.359046	0.417133	0.476473	0.524762	0.626937	0.736819	0.812334	0.913888	1.00524	1.19869	1.2648	1.45673	1.69109	1.88907	2.31227	2.67155	3.6533	8.76941	72.1386
0.0136493	0.0725749	0.127302	0.17683	0.226502	0.248047	0.312711	0.359566	0.41729	0.476864	0.524851	0.628309	0.737327	0.812358	0.915796	1.00573	1.20011	1.2648	1.4573	1.69604	1.88907	2.31711	2.67155	3.65837	8.86399	72.277
0.0141544	0.0725978	0.127387	0.176978	0.226734	0.248047	0.312976	0.360094	0.417477	0.477454	0.526439	0.628563	0.737335	0.813274	0.916203	1.00659	1.20012	1.2648	1.45922	1.69761	1.89194	2.32592	2.67155	3.67538	8.9469	72.5625
0.014345	0.0726676	0.127412	0.176982	0.226809	0.248047	0.313377	0.360117	0.417577	0.478517	0.5265	0.629719	0.737795	0.813442	0.916518	1.00983	1.20058	1.2648	1.46282	1.69981	1.90161	2.33122	2.67155	3.68513	9.00052	73.4621
0.0145636	0.072838	0.127516	0.17711	0.227157	0.248047	0.313638	0.36049	0.417941	0.478928	0.527595	0.631028	0.7385	0.815504	0.917083	1.01027	1.20116	1.2648	1.46483	1.7018	1.90489	2.33216	2.67155	3.68748	9.02904	75.2171
0.0149591	0.0728841	0.127577	0.17722	0.227515	0.248047	0.313702	0.360526	0.419126	0.479949	0.52815	0.631824	0.739437	0.817547	0.917202	1.01055	1.20404	1.2648	1.46744	1.70232	1.9066	2.34007	2.67155	3.68748	9.1428	76.6786
0.0152105	0.0729633	0.127594	0.17782	0.227648	0.248047	0.314325	0.360613	0.419354	0.480424	0.528297	0.631899	0.74093	0.818522	0.918411	1.01212	1.20578	1.26508	1.47505	1.70341	1.91072	2.34007	2.67155	3.70057	9.35102	77.5514
0.0153148	0.0729949	0.12796	0.177951	0.227655	0.248047	0.314698	0.360756	0.419639	0.481183	0.529173	0.633141	0.741145	0.821995	0.920769	1.01233	1.20648	1.26656	1.47535	1.70666	1.9112	2.34007	2.67155	3.72165	9.7467	77.8741
0.0153434	0.0730684	0.128165	0.178049	0.227714	0.248047	0.314741	0.361039	0.420263	0.48151	0.530231	0.633567	0.742047	0.822427	0.921371	1.0146	1.20686	1.26668	1.48083	1.71014	1.91945	2.34007	2.67155	3.74559	9.81275
0.0154388	0.0730746	0.12818	0.178052	0.227827	0.248047	0.316295	0.361301	0.420404	0.481572	0.530314	0.634264	0.742591	0.824875	0.921467	1.01515	1.20823	1.26681	1.48183	1.71429	1.92258	2.34007	2.67155	3.75106	10.0513
0.0155029	0.0731669	0.128484	0.178068	0.228102	0.248047	0.316529	0.361447	0.420637	0.482045	0.531141	0.635307	0.742975	0.825189	0.922683	1.01714	1.21021	1.2672	1.48476	1.71453	1.93709	2.34007	2.67155	3.75256	10.2272
0.0155549	0.0733582	0.128626	0.178379	0.228243	0.248047	0.316542	0.361652	0.421099	0.482176	0.531435	0.636854	0.743277	0.825253	0.923113	1.01774	1.21053	1.26741	1.48828	1.71528	1.93731	2.34007	2.67787	3.75363	11.1621
0.0155999	0.0735211	0.128763	0.178456	0.228355	0.248047	0.316574	0.362104	0.42193	0.482595	0.532132	0.636895	0.744141	0.826647	0.925126	1.0204	1.2107	1.26771	1.48828	1.71568	1.93731	2.34007	2.68304	3.76331	11.2061
0.0158692	0.073723	0.128896	0.178556	0.229217	0.248047	0.316698	0.36217	0.421947	0.483523	0.532564	0.637098	0.744141	0.827121	0.925525	1.02108	1.21108	1.2701	1.48828	1.7173	1.93731	2.34007	2.69158	3.76732	12.2551
0.0159234	0.0737405	0.128927	0.178721	0.229856	0.248047	0.316905	0.362561	0.422524	0.483829	0.534147	0.637564	0.744141	0.827907	0.926023	1.02123	1.2131	1.27227	1.48828	1.72452	1.93731	2.34007	2.70625	3.78453	12.2551
0.015974	0.0742441	0.129025	0.178775	0.230023	0.248047	0.316919	0.363138	0.422765	0.484479	0.534479	0.639503	0.744141	0.829102	0.926186	1.02158	1.21317	1.28	1.48828	1.7256	1.94015	2.34489	2.70736	3.79358	12.4321
0.0159817	0.0745117	0.129142	0.179044	0.230119	0.248047	0.318598	0.364004	0.422795	0.484506	0.535149	0.639765	0.744141	0.830431	0.928396	1.02195	1.21349	1.28082	1.48828	1.72683	1.94984	2.35032	2.70824	3.80809	13.3577
0.0160009	0.0745198	0.129219	0.179156	0.230147	0.248047	0.318765	0.36473	0.423687	0.484664	0.535612	0.639997	0.744141	0.831832	0.928502	1.02206	1.21656	1.2809	1.48828	1.73613	1.95076	2.35083	2.7095	3.8424	13.4152
0.0162527	0.0747129	0.129952	0.179265	0.230367	0.248047	0.318784	0.365071	0.423808	0.487271	0.535982	0.640145	0.744141	0.832332	0.928665	1.02272	1.21675	1.28907	1.48828	1.73633	1.95574	2.35318	2.71884	3.84794	13.5884
0.0163203	0.074837	0.130369	0.179296	0.230524	0.248047	0.318851	0.365103	0.423845	0.487651	0.536243	0.640277	0.744141	0.832502	0.929668	1.02272	1.21913	1.29326	1.48933	1.73633	1.96546	2.35318	2.73233	3.86133	13.5884
0.0164545	0.0749401	0.130547	0.1793	0.230652	0.248047	0.319094	0.365351	0.424283	0.488054	0.537524	0.640508	0.744141	0.833642	0.929802	1.02272	1.21957	1.29385	1.49005	1.73633	1.96911	2.35318	2.73706	3.86188	13.8196
0.0164629	0.0751942	0.130565	0.179329	0.231575	0.248047	0.319264	0.365531	0.424839	0.490151	0.538228	0.6406	0.744141	0.834999	0.929826	1.02272	1.22152	1.29519	1.49087	1.73633	1.97663	2.37504	2.73821	3.86688	13.8196
0.016497	0.0753803	0.130613	0.179766	0.232335	0.248047	0.319351	0.365732	0.426387	0.490449	0.538381	0.641415	0.744141	0.835483	0.931965	1.02272	1.22427	1.29775	1.49125	1.73633	1.9781	2.37506	2.73977	3.87462	13.884
0.0166307	0.0754032	0.130838	0.179919	0.232432	0.248362	0.319988	0.365778	0.426448	0.490645	0.538753	0.643198	0.744141	0.835762	0.932888	1.02272	1.22645	1.30127	1.49871	1.73633	1.98017	2.37928	2.73977	3.87462	13.9899
0.0167615	0.0754246	0.131051	0.179963	0.232587	0.248436	0.320956	0.365812	0.426805	0.491362	0.53922	0.643447	0.744141	0.837776	0.93291	1.02272	1.22707	1.30134	1.50337	1.73633	1.98438	2.38313	2.74617	3.87937	14.0514
0.0168032	0.0755027	0.131172	0.18025	0.232596	0.248625	0.32104	0.366082	0.427135	0.491531	0.539582	0.647003	0.744141	0.838978	0.934917	1.02272	1.22736	1.30613	1.50379	1.73633	1.98438	2.38668	2.75961	3.88873	14.0514
0.0168713	0.0757442	0.131412	0.180661	0.232649	0.249273	0.321622	0.366094	0.427155	0.49216	0.540238	0.648408	0.744141	0.839612	0.935051	1.02272	1.22963	1.30994	1.50441	1.73633	1.98438	2.39195	2.76721	3.91023	14.1995
0.0169876	0.0758088	0.13151	0.180862	0.234154	0.249329	0.32175	0.366369	0.427466	0.492608	0.541742	0.648619	0.744141	0.840283	0.935844	1.02272	1.2299	1.31165	1.50483	1.73633	1.98438	2.39289	2.77325	3.91373	14.2837
0.0171215	0.0759342	0.131874	0.180874	0.234235	0.249753	0.321855	0.366862	0.428154	0.492851	0.54212	0.649195	0.744141	0.8408	0.93719	1.02425	1.23049	1.31235	1.5052	1.73763	1.98438	2.39641	2.77325	3.92197	14.2837
0.0171265	0.0759534	0.131915	0.181224	0.234372	0.250001	0.321917	0.366967	0.428198	0.493456	0.544402	0.649443	0.744141	0.840888	0.938134	1.02452	1.23122	1.31268	1.50589	1.73955	1.98438	2.39705	2.77325	3.92913	14.5166
0.0173442	0.0759661	0.132095	0.181461	0.234432	0.250979	0.32243	0.367214	0.428383	0.493648	0.54672	0.650809	0.744141	0.840922	0.938436	1.02585	1.23129	1.31299	1.50881	1.74057	1.98438	2.41091	2.77325	3.9518	14.5166
0.0176454	0.075977	0.132621	0.181581	0.234439	0.25155	0.323747	0.367528	0.428419	0.493766	0.547618	0.651127	0.744141	0.84094	0.93988	1.02934	1.23161	1.31302	1.50881	1.74249	1.98489	2.42248	2.77325	3.95682	14.5166
0.0179975	0.0761569	0.132652	0.181666	0.234756	0.251651	0.323871	0.367845	0.429051	0.494317	0.547798	0.653289	0.744141	0.843057	0.940388	1.0313	1.23256	1.31788	1.50881	1.74355	1.9869	2.43208	2.77325	3.96612	14.5166
0.0181371	0.0761675	0.132942	0.182001	0.235008	0.251878	0.323992	0.367845	0.429448	0.495366	0.54807	0.653848	0.744141	0.843326	0.94045	1.03411	1.2326	1.31818	1.50881	1.74399	1.99012	2.43345	2.77325	3.97411	14.5166
0.0181791	0.0762099	0.133005	0.182025	0.235178	0.252073	0.324528	0.368195	0.429549	0.495433	0.548636	0.653966	0.744141	0.843995	0.940944	1.03553	1.23338	1.31878	1.50881	1.74527	1.99692	2.43499	2.77325	3.97482	14.6537
0.0187538	0.0762794	0.133044	0.182105	0.235196	0.252113	0.324988	0.368581	0.42997	0.495713	0.549613	0.654634	0.744141	0.844184	0.942703	1.03574	1.23554	1.32108	1.50881	1.74672	1.99835	2.43645	2.77325	3.97828	14.7249
0.0187866	0.076489	0.133199	0.182155	0.235425	0.252242	0.326053	0.369891	0.430015	0.495749	0.550162	0.656012	0.744141	0.845136	0.943441	1.03635	1.23577	1.32185	1.50881	1.74772	1.99982	2.44298	2.77325	3.98021	15.8924
0.0189772	0.0764959	0.13368	0.182238	0.235477	0.252701	0.32629	0.369915	0.430971	0.496094	0.550558	0.657783	0.744141	0.846041	0.943606	1.03716	1.23591	1.3236	1.50881	1.75196	1.99982	2.44298	2.77325	3.98078	15.9098
0.0191354	0.0765823	0.133824	0.182269	0.235533	0.252704	0.326337	0.370152	0.431017	0.496094	0.551336	0.658109	0.744141	0.846789	0.943819	1.03852	1.23744	1.32375	1.50881	1.75301	1.99982	2.44863	2.77325	3.98725	15.9253
0.0191354	0.0766024	0.133971	0.182583	0.236265	0.252907	0.326357	0.370269	0.431285	0.496094	0.552157	0.658531	0.744141	0.847573	0.944749	1.03921	1.23961	1.32743	1.50881	1.75396	1.99982	2.44979	2.77325	3.99306	15.9851
0.019137	0.0766975	0.134028	0.183164	0.236384	0.253166	0.326602	0.370463	0.431806	0.496094	0.552645	0.658612	0.744141	0.847871	0.945679	1.04164	1.23997	1.33471	1.50881	1.75396	1.99982	2.45075	2.77325	4.00185	15.9985
0.0195725	0.0771331	0.134359	0.183363	0.236431	0.25336	0.326657	0.370509	0.433068	0.496094	0.552723	0.659756	0.744141	0.848062	0.946037	1.04337	1.24023	1.33577	1.50881	1.75396	1.99982	2.45165	2.77325	4.00235	16.0389
0.0197447	0.0772062	0.134441	0.184248	0.236625	0.253535	0.327403	0.370733	0.433163	0.496094	0.552822	0.660079	0.744141	0.848092	0.948236	1.0435	1.24023	1.33577	1.50881	1.75396	1.99982	2.4557	2.77614	4.00725	16.1402
0.0198825	0.0772125	0.134569	0.184381	0.23694	0.25411	0.327442	0.371079	0.434612	0.496094	0.55338	0.660128	0.744141	0.84827	0.948964	1.04353	1.24023	1.33577	1.50998	1.75396	1.99982	2.46493	2.77812	4.03263	16.2144
0.0198825	0.0773108	0.135006	0.184428	0.237489	0.254185	0.327627	0.371576	0.434951	0.496094	0.554209	0.66041	0.744141	0.848867	0.949839	1.04447	1.24023	1.33577	1.51015	1.75396	1.99982	2.46638	2.78378	4.03702	16.3372
0.0198825	0.0773967	0.135143	0.184505	0.237801	0.254325	0.327923	0.372026	0.435204	0.496094	0.55465	0.660984	0.744141	0.849899	0.950292	1.04636	1.24023	1.33577	1.5107	1.75396	1.99982	2.47675	2.78612	4.04463	16.3579
0.0198825	0.077463	0.135495	0.184506	0.237945	0.254679	0.328059	0.372075	0.435338	0.496094	0.55465	0.661966	0.744141	0.850339	0.952322	1.04679	1.24023	1.33577	1.51117	1.75396	1.99997	2.47774	2.78831	4.0447	16.3786
0.0198875	0.0776916	0.135619	0.184839	0.238108	0.255174	0.328109	0.37216	0.435563	0.496094	0.55465	0.662424	0.744141	0.850488	0.952669	1.04944	1.24023	1.33577	1.51354	1.75396	2.00012	2.48047	2.7901	4.05187	16.4629
0.0199554	0.0777151	0.135867	0.184925	0.238201	0.255201	0.328232	0.372453	0.436112	0.496094	0.55465	0.66254	0.744141	0.856633	0.955494	1.05237	1.24023	1.33577	1.51488	1.75396	2.00064	2.48047	2.79668	4.05432	16.7739
0.0201247	0.0778132	0.135967	0.184969	0.23837	0.255492	0.328275	0.372986	0.436365	0.496094	0.55465	0.662584	0.744141	0.856663	0.955757	1.05237	1.24023	1.33577	1.51749	1.75396	2.00189	2.48047	2.80087	4.0587	16.8032
0.0201979	0.0778672	0.136092	0.185735	0.238465	0.255538	0.328927	0.373018	0.436712	0.496094	0.55465	0.662879	0.744141	0.85814	0.955982	1.05237	1.24023	1.33577	1.52117	1.75396	2.00202	2.48047	2.80633	4.06827	16.9291
0.0203039	0.0783816	0.136238	0.185751	0.238556	0.255745	0.329151	0.374139	0.436865	0.496094	0.55465	0.664543	0.744141	0.858217	0.960048	1.05237	1.24023	1.33577	1.5231	1.75396	2.00565	2.48047	2.80667	4.06869	17.0215
0.0203266	0.0783861	0.136241	0.185937	0.238982	0.255979	0.329168	0.374809	0.437508	0.496094	0.55465	0.665976	0.744141	0.859194	0.960897	1.05422	1.24023	1.33577	1.52463	1.75396	2.02586	2.48047	2.81374	4.07948	17.0702
0.0203991	0.0784786	0.1365	0.186176	0.238983	0.256242	0.329344	0.374902	0.437643	0.496094	0.55465	0.666126	0.744141	0.859208	0.96209	1.05535	1.24023	1.33577	1.52504	1.75396	2.04545	2.48047	2.82644	4.09218	17.144
0.0204172	0.0785412	0.136562	0.186179	0.240126	0.256856	0.329413	0.375088	0.438348	0.496094	0.55465	0.666257	0.744141	0.860236	0.962342	1.0582	1.24023	1.33577	1.52651	1.75396	2.04997	2.48047	2.8267	4.10175	17.2727
0.0204759	0.0786823	0.136712	0.186327	0.240203	0.257125	0.329491	0.37525	0.438695	0.496094	0.55465	0.666412	0.744141	0.861119	0.96281	1.05887	1.24023	1.33577	1.5282	1.75396	2.06435	2.48047	2.82817	4.10543	17.5431
0.0205239	0.0790311	0.136798	0.186452	0.240623	0.257341	0.329739	0.375717	0.439119	0.496094	0.55465	0.666439	0.744141	0.861396	0.962984	1.05993	1.24023	1.33577	1.52825	1.75396	2.06481	2.48047	2.82817	4.11837	17.5431
0.0205991	0.0791442	0.136933	0.18662	0.240645	0.257408	0.330102	0.376941	0.439534	0.496094	0.55465	0.667174	0.744141	0.861467	0.965395	1.06128	1.24023	1.33577	1.53168	1.75396	2.0705	2.48047	2.82817	4.13476	17.5956
0.0206628	0.0792125	0.137014	0.186691	0.240742	0.257741	0.330128	0.377235	0.440162	0.496094	0.55465	0.667261	0.744141	0.861648	0.965617	1.06136	1.24023	1.33577	1.53323	1.75396	2.07445	2.48047	2.82817	4.14966	17.9041
0.021084	0.0794085	0.137183	0.186805	0.240782	0.257818	0.330223	0.377734	0.440476	0.496094	0.55465	0.667687	0.744141	0.862019	0.965804	1.06335	1.24023	1.33577	1.53488	1.75396	2.07683	2.48047	2.84673	4.15458	17.9093
0.0213021	0.0794096	0.13729	0.186933	0.24079	0.257859	0.33055	0.377795	0.440866	0.496094	0.55465	0.66984	0.744141	0.862758	0.966098	1.06409	1.24023	1.33577	1.53491	1.75396	2.08166	2.48047	2.85407	4.17963	18.0257
0.0215801	0.0794099	0.137353	0.187091	0.241095	0.257885	0.33067	0.378009	0.440914	0.496094	0.55465	0.670998	0.74638	0.862759	0.966378	1.06419	1.24023	1.33577	1.54161	1.75396	2.08503	2.48047	2.89157	4.1853	18.2411
0.0220751	0.0794498	0.137433	0.187261	0.241367	0.257935	0.330805	0.378043	0.441167	0.496094	0.55465	0.671843	0.748219	0.862848	0.967877	1.06438	1.24023	1.33577	1.54334	1.75396	2.09845	2.48047	2.8927	4.19468	18.3018
0.0223755	0.0796261	0.138135	0.187312	0.241531	0.257974	0.331628	0.378912	0.442368	0.496094	0.55465	0.672995	0.748532	0.864075	0.968457	1.06528	1.24023	1.33577	1.54808	1.75396	2.10475	2.48047	2.8927	4.21574	18.4157
0.0224486	0.0797117	0.138363	0.187383	0.241648	0.258071	0.331702	0.378963	0.442964	0.496094	0.55465	0.673182	0.748636	0.864554	0.969292	1.06537	1.24023	1.33577	1.54983	1.75396	2.10947	2.48047	2.8927	4.22736	18.6448
0.0225057	0.0797589	0.138394	0.187429	0.241894	0.258251	0.331882	0.37901	0.443722	0.496094	0.55465	0.673412	0.748662	0.869402	0.969338	1.06898	1.24023	1.33601	1.55141	1.75396	2.11298	2.48047	2.8927	4.22976	18.7878
0.0225617	0.0798513	0.13848	0.187466	0.242103	0.258507	0.332053	0.379328	0.443823	0.496094	0.55465	0.674056	0.748813	0.869594	0.970536	1.06964	1.24023	1.33702	1.55228	1.75396	2.11628	2.48047	2.89626	4.23759	18.8532
0.0226298	0.080039	0.13849	0.188303	0.242119	0.258713	0.332124	0.379386	0.443976	0.496094	0.55465	0.674631	0.749848	0.870679	0.972173	1.07026	1.24023	1.3381	1.55345	1.75396	2.11815	2.48047	2.90171	4.26073	18.8907
0.0227545	0.0800489	0.139576	0.188367	0.242238	0.259128	0.332257	0.379526	0.444512	0.496094	0.55465	0.67537	0.750574	0.870768	0.974289	1.07068	1.24023	1.33963	1.55354	1.75396	2.11931	2.48047	2.90331	4.26379	19.0027
0.0228183	0.0801963	0.139671	0.18861	0.242308	0.259317	0.332721	0.380063	0.444527	0.496094	0.55465	0.676342	0.751955	0.874645	0.975882	1.07076	1.24023	1.34049	1.55446	1.75396	2.11931	2.48047	2.90929	4.26756	19.0996
0.0231529	0.0804638	0.139745	0.189103	0.242852	0.259328	0.333128	0.380446	0.445006	0.496094	0.55465	0.677008	0.752657	0.874867	0.976289	1.07399	1.24023	1.34057	1.55607	1.75396	2.13378	2.48047	2.90949	4.26756	19.1189
0.0231924	0.0805417	0.139847	0.189281	0.243073	0.259832	0.33339	0.380789	0.445295	0.496094	0.55465	0.677648	0.753161	0.875687	0.976357	1.07843	1.24023	1.34245	1.55715	1.75396	2.13378	2.48047	2.91133	4.28195	19.1254
0.0231977	0.0806616	0.139994	0.189634	0.243139	0.259964	0.334166	0.380803	0.445349	0.496094	0.554714	0.678219	0.753756	0.875788	0.977502	1.08049	1.24023	1.34427	1.56052	1.75396	2.13378	2.48047	2.91265	4.28827	19.1912
0.0233856	0.0807094	0.140066	0.189877	0.243302	0.259994	0.334504	0.381826	0.446016	0.496094	0.556186	0.678497	0.75418	0.875902	0.977528	1.0814	1.24023	1.34504	1.56366	1.75396	2.13378	2.48047	2.94115	4.29794	19.196
0.0234431	0.0810457	0.140133	0.189975	0.243561	0.260005	0.334601	0.382194	0.446119	0.496094	0.556671	0.679115	0.755571	0.878234	0.978014	1.08442	1.24023	1.34879	1.56414	1.75396	2.13378	2.48819	2.94477	4.31971	19.196
0.0237102	0.0815741	0.140235	0.190115	0.243779	0.26012	0.334982	0.382212	0.44626	0.496094	0.557572	0.679347	0.756611	0.878289	0.978533	1.08468	1.24023	1.35178	1.56782	1.75396	2.13378	2.48966	2.95468	4.42392	19.3063
0.0237391	0.081638	0.140596	0.19046	0.243883	0.260448	0.335047	0.38236	0.446658	0.496094	0.559207	0.679713	0.756745	0.879417	0.978687	1.08858	1.24023	1.35335	1.5687	1.75396	2.13378	2.491	2.96534	4.47173	20.1713
0.0238863	0.0816909	0.141103	0.190911	0.244941	0.260548	0.335178	0.382549	0.446906	0.496094	0.559445	0.680683	0.758626	0.879649	0.9813	1.08896	1.24023	1.35478	1.56879	1.75396	2.13378	2.49259	2.96577	4.47173	20.7234
0.0239413	0.0820591	0.141137	0.191551	0.245264	0.260747	0.335442	0.38275	0.447331	0.496094	0.560049	0.680758	0.758659	0.880596	0.981923	1.09044	1.24023	1.35563	1.56879	1.75396	2.13378	2.49284	2.97033	4.47173	21.0475
0.0240135	0.0823322	0.141277	0.191645	0.245411	0.261707	0.335447	0.383377	0.448483	0.496094	0.561382	0.681564	0.760288	0.88169	0.983807	1.09191	1.24023	1.35611	1.56879	1.75396	2.13546	2.49284	2.97688	4.47173	21.1786
0.0241846	0.0823785	0.141588	0.191672	0.245424	0.26174	0.335463	0.383861	0.448736	0.496094	0.562658	0.683065	0.761069	0.881802	0.983843	1.09321	1.24023	1.35684	1.56879	1.75396	2.14092	2.49284	2.98408	4.47173	21.4141
0.0242744	0.0826071	0.141803	0.191924	0.24557	0.262321	0.335472	0.384128	0.448834	0.496094	0.564207	0.684638	0.762296	0.883971	0.98625	1.09443	1.24023	1.35902	1.56879	1.75396	2.14636	2.49284	2.98614	4.47521	21.5858
0.0245579	0.0826268	0.141805	0.192151	0.245987	0.263026	0.33549	0.384815	0.448905	0.496094	0.564787	0.687472	0.762695	0.884432	0.987739	1.09954	1.24023	1.36417	1.56879	1.75396	2.1465	2.49284	2.99441	4.51279	21.8507
0.0246311	0.0831288	0.142019	0.1923	0.246238	0.263486	0.335547	0.385079	0.449919	0.496094	0.56632	0.691818	0.765126	0.884688	0.988495	1.09959	1.24023	1.36486	1.56879	1.75396	2.15302	2.49284	2.99716	4.52761	21.9083
0.024652	0.0831443	0.142145	0.192486	0.246263	0.263817	0.335689	0.38524	0.450708	0.496094	0.567168	0.692877	0.768669	0.885131	0.991094	1.10033	1.24023	1.36692	1.56879	1.75509	2.15642	2.49284	2.99716	4.55972	22.0998
0.0248533	0.083274	0.142235	0.192553	0.246526	0.263855	0.33569	0.385315	0.451143	0.496094	0.567384	0.69355	0.768856	0.887568	0.99123	1.10059	1.24023	1.36827	1.57616	1.75636	2.16003	2.49284	2.99716	4.58332	22.6715
0.024904	0.0833937	0.14251	0.192802	0.246631	0.264077	0.33569	0.385556	0.451183	0.496094	0.568288	0.693672	0.768954	0.888063	0.991643	1.10312	1.24023	1.37005	1.57745	1.75704	2.16193	2.49284	2.99725	4.64009	22.8014
0.0249238	0.0834069	0.142615	0.19303	0.246671	0.26413	0.336487	0.385559	0.452795	0.496094	0.568383	0.694188	0.770483	0.889187	0.991994	1.10347	1.24023	1.37089	1.58077	1.75736	2.16476	2.49284	3.0278	4.64786	22.9815
0.0249866	0.0835222	0.143409	0.193213	0.246804	0.264243	0.336572	0.386495	0.45286	0.496094	0.569836	0.694579	0.77077	0.889369	0.992188	1.10361	1.24023	1.37111	1.58528	1.75746	2.16565	2.49778	3.0278	4.65108	23.5056
0.0250527	0.0837151	0.143571	0.193357	0.246901	0.26564	0.336935	0.386638	0.453174	0.496094	0.570408	0.694818	0.770875	0.89021	0.992188	1.10799	1.24023	1.37181	1.58608	1.75754	2.1666	2.4987	3.0278	4.68014	23.877
0.0252503	0.0838509	0.143783	0.193412	0.247018	0.265757	0.337779	0.387412	0.4533	0.496094	0.570408	0.696045	0.771112	0.891746	0.992188	1.10845	1.24023	1.37184	1.58827	1.75817	2.18177	2.50249	3.0278	4.68014	24.1065
0.0253351	0.0838803	0.143856	0.193426	0.247019	0.26577	0.337917	0.388091	0.45332	0.496094	0.570714	0.697311	0.771186	0.893107	0.992188	1.1093	1.24023	1.37241	1.58827	1.7593	2.18301	2.50374	3.0278	4.68014	24.2148
0.0255238	0.0840162	0.143981	0.193434	0.24707	0.265993	0.337931	0.388548	0.453357	0.496094	0.570969	0.697347	0.772438	0.893738	0.992188	1.1093	1.24023	1.37992	1.58827	1.76405	2.18943	2.50688	3.0278	4.68014	24.3958
0.0255238	0.0842706	0.144063	0.193521	0.247244	0.266063	0.337949	0.388652	0.453724	0.496094	0.571175	0.697577	0.772442	0.894346	0.992188	1.1093	1.24023	1.38327	1.58827	1.76407	2.19392	2.50863	3.0278	4.68014	24.5178
0.0255789	0.0842755	0.14415	0.193668	0.247711	0.266412	0.338376	0.388716	0.45421	0.496094	0.571352	0.697803	0.776023	0.894346	0.992188	1.1093	1.24023	1.38573	1.58827	1.76728	2.20273	2.51599	3.0278	4.71791	24.6978
0.0255885	0.0844472	0.144503	0.193967	0.247851	0.266981	0.338386	0.389196	0.45659	0.496094	0.57159	0.698831	0.776122	0.894346	0.992188	1.1093	1.24023	1.38584	1.58827	1.76744	2.20743	2.51955	3.0551	4.73677	25.0724
0.0256462	0.0846132	0.144537	0.194189	0.248047	0.267509	0.33848	0.389588	0.457252	0.496094	0.572521	0.700254	0.776494	0.894346	0.992188	1.1093	1.24023	1.3869	1.58827	1.76753	2.2186	2.52498	3.06433	4.73893	25.968
0.0257551	0.0847897	0.144563	0.194211	0.248047	0.267777	0.33936	0.390096	0.457351	0.496094	0.572771	0.700513	0.776794	0.894346	0.992188	1.1093	1.24023	1.39051	1.58827	1.76912	2.2271	2.52959	3.08233	4.77128	26.49
0.0257972	0.0848039	0.144564	0.194378	0.248047	0.268164	0.339576	0.390794	0.45742	0.496094	0.573423	0.701583	0.777513	0.894346	0.992188	1.1093	1.24023	1.39059	1.58827	1.77105	2.23242	2.52959	3.09574	4.78475	26.7396
0.0258567	0.0849791	0.144763	0.194469	0.248047	0.268224	0.339931	0.391685	0.45743	0.496094	0.574033	0.701583	0.777694	0.894346	0.992188	1.1093	1.24023	1.39281	1.58827	1.77176	2.23242	2.52959	3.1157	4.78888	26.9642
0.0258722	0.0850844	0.144955	0.19447	0.248047	0.268514	0.340566	0.391955	0.457484	0.496094	0.574588	0.701583	0.778451	0.894346	0.992188	1.1093	1.24023	1.395	1.58827	1.77181	2.23242	2.52959	3.12251	4.80408	27.4179
0.0259236	0.0851474	0.145042	0.195066	0.248047	0.26878	0.340737	0.39216	0.457683	0.49791	0.576071	0.701583	0.779298	0.894346	0.992188	1.11009	1.24023	1.3959	1.58827	1.77204	2.23242	2.52959	3.12464	4.80928	27.465
0.0259591	0.0852562	0.145045	0.195414	0.248047	0.26889	0.340893	0.392906	0.457714	0.498017	0.576742	0.701583	0.779879	0.894346	0.992188	1.11039	1.24023	1.39625	1.58827	1.77223	2.23242	2.52959	3.1275	4.8694	27.7325
0.0260688	0.085513	0.145208	0.195532	0.248047	0.268909	0.342013	0.393159	0.457769	0.498578	0.577423	0.701583	0.780862	0.894346	0.992188	1.11094	1.24023	1.39647	1.58827	1.78085	2.23242	2.52959	3.17136	4.88596	28.0655
0.0261875	0.0856251	0.145579	0.195664	0.248047	0.269013	0.342428	0.394039	0.458612	0.498609	0.577646	0.701583	0.784393	0.894346	0.992188	1.11282	1.24023	1.39663	1.58827	1.7811	2.23242	2.52993	3.17229	4.89225	28.2392
0.0261971	0.085867	0.145647	0.195804	0.248047	0.269417	0.342486	0.394263	0.458632	0.499484	0.577855	0.701933	0.784393	0.894346	0.992188	1.11394	1.24023	1.39673	1.58827	1.78183	2.23548	2.53793	3.17655	4.89225	28.4649
0.0262218	0.0860849	0.145784	0.196536	0.248047	0.269484	0.342575	0.394314	0.458662	0.499852	0.580492	0.702043	0.784393	0.894451	0.992188	1.11518	1.24023	1.39831	1.58827	1.78801	2.24616	2.53983	3.17655	4.92518	28.5523
0.0265607	0.0864159	0.145854	0.196594	0.248047	0.269491	0.342669	0.394905	0.458677	0.500083	0.580574	0.702586	0.784393	0.896908	0.992188	1.1163	1.24023	1.4004	1.58827	1.78869	2.24616	2.54471	3.17655	4.93715	30.7358
0.026629	0.0867176	0.14587	0.196615	0.248047	0.270442	0.34284	0.395544	0.458889	0.500165	0.58214	0.70329	0.784393	0.897082	0.992188	1.11821	1.24023	1.40317	1.58827	1.78869	2.24618	2.5538	3.17909	4.95702	31.3021
0.0267155	0.0867378	0.146017	0.196894	0.248047	0.270593	0.343113	0.395557	0.459125	0.501172	0.582418	0.705439	0.784393	0.897527	0.992188	1.12019	1.24023	1.40317	1.59316	1.78869	2.2507	2.5538	3.17979	5.00314	31.5371
0.0268788	0.0868941	0.146874	0.196902	0.248047	0.271091	0.343582	0.395577	0.45947	0.501428	0.585532	0.706055	0.784393	0.900376	0.992188	1.12103	1.24023	1.40317	1.59368	1.78869	2.25194	2.5538	3.19636	5.01584	31.7655
0.0269339	0.0869252	0.147085	0.197013	0.248047	0.271531	0.343634	0.39612	0.460075	0.502129	0.58596	0.706317	0.784393	0.900425	0.992188	1.12446	1.24023	1.40317	1.59374	1.78869	2.26417	2.5538	3.20343	5.0385	32.0979
0.0270371	0.0869909	0.147127	0.197024	0.248047	0.271565	0.343827	0.396584	0.460229	0.502189	0.586271	0.706472	0.784393	0.900709	0.992188	1.1246	1.24023	1.40409	1.59423	1.78869	2.26578	2.5538	3.21059	5.04513	32.2547
0.0272744	0.0871632	0.147398	0.197069	0.248047	0.271818	0.343854	0.396606	0.460251	0.502678	0.587204	0.707355	0.784393	0.901159	0.992188	1.12762	1.24023	1.40465	1.5966	1.78869	2.26748	2.5538	3.21102	5.04616	32.3803
0.0273268	0.0871899	0.147511	0.197085	0.248047	0.27198	0.344146	0.396722	0.460808	0.503115	0.587971	0.707894	0.784393	0.902006	0.992188	1.13014	1.24023	1.40502	1.59934	1.78869	2.27155	2.5538	3.21269	5.07273	32.6641
0.0273766	0.0872058	0.147558	0.197412	0.248047	0.273545	0.344154	0.397282	0.461032	0.5036	0.588383	0.709953	0.784393	0.902238	0.992188	1.13945	1.24023	1.41069	1.60023	1.79146	2.28688	2.5622	3.22461	5.07533	32.7046
0.0273932	0.0875891	0.147643	0.197773	0.248047	0.27355	0.344172	0.397641	0.461211	0.503616	0.589985	0.712233	0.785016	0.9051	0.992188	1.14025	1.24023	1.41295	1.60211	1.79455	2.28688	2.56743	3.24348	5.07821	32.7431
0.0275201	0.0876123	0.148082	0.197878	0.248047	0.273696	0.344555	0.397949	0.461231	0.504491	0.590253	0.713797	0.785559	0.905522	0.992188	1.14037	1.24023	1.41432	1.60423	1.79515	2.28688	2.56883	3.24593	5.09796	32.7431
0.0275879	0.0876334	0.148432	0.197912	0.248047	0.273766	0.344777	0.397962	0.461299	0.505269	0.590734	0.714276	0.785605	0.906055	0.992188	1.14049	1.24023	1.41532	1.60431	1.80581	2.28688	2.5691	3.27077	5.10492	32.909
0.0276984	0.0877649	0.148483	0.197969	0.248047	0.273996	0.34534	0.398592	0.461493	0.505319	0.592041	0.714411	0.785643	0.906269	0.992188	1.14123	1.24023	1.41797	1.60549	1.80581	2.2891	2.58247	3.27217	5.1076	33.0359
0.0277106	0.0878949	0.148915	0.19802	0.248047	0.274056	0.345595	0.398761	0.461682	0.505486	0.594007	0.714854	0.786746	0.907437	0.992188	1.14272	1.24023	1.41943	1.60825	1.80581	2.2902	2.58494	3.29715	5.1076	33.0834
0.0279033	0.0881389	0.149013	0.198116	0.248047	0.2741	0.34566	0.399013	0.463672	0.505606	0.594849	0.71508	0.791337	0.907562	0.992188	1.14498	1.24023	1.41958	1.61008	1.80581	2.29554	2.58969	3.29767	5.13194	33.1159
0.0279163	0.0881873	0.149201	0.198711	0.248047	0.274149	0.345682	0.399489	0.464575	0.506331	0.595449	0.715757	0.794598	0.910411	0.992188	1.14975	1.24023	1.41969	1.61076	1.80581	2.29759	2.58969	3.30602	5.16571	33.291
0.0279232	0.0882854	0.149349	0.198818	0.248047	0.274191	0.346171	0.401271	0.46465	0.506689	0.595643	0.716171	0.794998	0.911902	0.992188	1.14983	1.24023	1.42162	1.61183	1.80779	2.30641	2.58969	3.33713	5.23615	33.7207
0.0279405	0.0883162	0.149546	0.198936	0.248047	0.274558	0.346183	0.40187	0.464664	0.506915	0.597424	0.716322	0.79504	0.912653	0.992188	1.15019	1.24023	1.42219	1.61194	1.81024	2.30766	2.58969	3.33713	5.26187	34.382
0.0284349	0.0884636	0.149604	0.198973	0.248047	0.274652	0.346384	0.401886	0.465175	0.507817	0.598789	0.716557	0.796458	0.913632	0.992188	1.15069	1.24023	1.42286	1.61284	1.81263	2.30767	2.58969	3.33713	5.26187	34.7832
0.0287831	0.0885188	0.149787	0.199045	0.248047	0.274835	0.34691	0.40276	0.466433	0.507861	0.599214	0.719214	0.796458	0.914098	0.992188	1.15094	1.24023	1.42474	1.61362	1.81331	2.30783	2.58969	3.33713	5.32579	35.4742
0.0288431	0.0886073	0.150005	0.199099	0.248047	0.275131	0.34715	0.402815	0.466693	0.507906	0.599736	0.721405	0.797848	0.914687	0.992188	1.15401	1.24023	1.42561	1.61375	1.81678	2.31172	2.58969	3.33713	5.32579	36.4663
0.0289822	0.0889006	0.150035	0.199412	0.248047	0.275185	0.347254	0.403131	0.468603	0.508061	0.599804	0.72173	0.799974	0.915011	0.992188	1.15562	1.24023	1.42867	1.61407	1.82047	2.32134	2.59265	3.35585	5.34309	37.4846
0.0290225	0.088922	0.15004	0.19973	0.248047	0.275215	0.347478	0.403187	0.469077	0.508249	0.600661	0.722557	0.80049	0.916206	0.992188	1.16201	1.24023	1.42921	1.61476	1.82075	2.32381	2.5954	3.36046	5.44009	37.5142
0.0290887	0.0891771	0.150075	0.199962	0.248047	0.275468	0.347495	0.403297	0.469589	0.508285	0.601878	0.724449	0.801424	0.917039	0.992188	1.16214	1.24023	1.43066	1.61968	1.82288	2.32403	2.60004	3.37803	5.46542	37.5215
0.0291853	0.0893507	0.150295	0.199964	0.248047	0.275566	0.347589	0.403478	0.470871	0.508396	0.601968	0.72487	0.802049	0.917444	0.994667	1.1628	1.24023	1.43305	1.62278	1.82733	2.32742	2.60263	3.38708	5.5465	38.2354
0.0293703	0.0894346	0.150374	0.200252	0.248047	0.276251	0.347956	0.404851	0.471525	0.510081	0.602139	0.72506	0.802788	0.918202	0.994894	1.16284	1.24023	1.43357	1.62513	1.83542	2.33756	2.60459	3.39935	5.59619	38.5272
0.0294795	0.089681	0.15071	0.200334	0.248047	0.276388	0.348134	0.40496	0.472385	0.510219	0.602423	0.727434	0.803111	0.919219	0.995381	1.165	1.24023	1.43684	1.62646	1.84033	2.33769	2.60527	3.4047	5.62361	39.1136
0.0294879	0.0898355	0.151125	0.200499	0.248047	0.276389	0.348446	0.405179	0.472762	0.512295	0.603035	0.728357	0.803707	0.919471	0.99604	1.16662	1.24023	1.44022	1.62765	1.84629	2.33783	2.61376	3.42763	5.80663	39.1144
0.0295748	0.0899778	0.151161	0.200507	0.248047	0.276494	0.348592	0.405509	0.472889	0.513297	0.603437	0.728976	0.804154	0.922277	0.997279	1.16834	1.24023	1.44052	1.63082	1.84658	2.34007	2.61428	3.42986	5.82101	39.116
0.0295873	0.0899998	0.151264	0.200575	0.248047	0.276504	0.349984	0.405923	0.473262	0.513403	0.6044	0.729367	0.804426	0.923038	1.00243	1.17021	1.24023	1.44089	1.63119	1.84697	2.34007	2.62272	3.4328	6.04034	40.1415
0.0295928	0.0901838	0.151341	0.201038	0.248047	0.276613	0.350023	0.406336	0.474066	0.513711	0.604417	0.72951	0.805413	0.923409	1.00588	1.17298	1.24023	1.44118	1.63121	1.84951	2.34007	2.62515	3.43696	6.14906	40.3341
0.0296634	0.0902227	0.151462	0.201151	0.248047	0.276615	0.350079	0.406383	0.474393	0.514384	0.60443	0.730763	0.808673	0.92352	1.00601	1.1774	1.24023	1.44148	1.64363	1.85185	2.34007	2.63677	3.50196	6.16136	40.3837
0.0297721	0.0903762	0.151696	0.201345	0.248047	0.276978	0.350791	0.40755	0.474476	0.514866	0.607158	0.732072	0.808901	0.925085	1.0062	1.17838	1.24023	1.44441	1.64843	1.85196	2.34007	2.64051	3.50791	6.24566	41.1788
0.0297855	0.0904912	0.151725	0.201382	0.248047	0.277072	0.350791	0.407606	0.475084	0.516106	0.608057	0.733644	0.809529	0.925228	1.00674	1.18045	1.24023	1.44635	1.6486	1.85312	2.34007	2.64539	3.50791	6.33057	41.778
0.0298204	0.0905902	0.151793	0.201589	0.248047	0.277678	0.350791	0.40908	0.475186	0.516121	0.608143	0.733957	0.809873	0.925811	1.00763	1.18065	1.24023	1.44635	1.64879	1.85555	2.34007	2.64703	3.50791	6.44922	41.9317
0.0299824	0.0907285	0.152156	0.201821	0.248047	0.27826	0.350791	0.410154	0.475188	0.516154	0.608344	0.734252	0.810542	0.928439	1.00841	1.18097	1.24023	1.44635	1.65102	1.85594	2.34007	2.64804	3.50912	6.51094	43.1031
0.0300029	0.0911788	0.152177	0.202078	0.248047	0.278375	0.350791	0.410354	0.47529	0.516708	0.608708	0.734346	0.810633	0.929615	1.00888	1.18131	1.24081	1.44635	1.65124	1.85791	2.34007	2.65088	3.5234	6.86064	43.1929
0.0302549	0.0912142	0.152425	0.202149	0.248047	0.278777	0.350791	0.410636	0.476075	0.51701	0.608898	0.734898	0.811325	0.93191	1.01069	1.18416	1.24089	1.44635	1.65209	1.86474	2.34007	2.65258	3.52541	6.90756	43.21
0.0302589	0.0912492	0.15249	0.202192	0.248047	0.278853	0.350791	0.410656	0.476337	0.518572	0.60981	0.735891	0.811953	0.933078	1.01123	1.18474	1.24098	1.44635	1.65962	1.8689	2.34007	2.65752	3.53765	6.90979	43.3422
0.0303938	0.091279	0.152702	0.202407	0.248047	0.279254	0.350791	0.410822	0.477054	0.518615	0.610101	0.736226	0.812081	0.933229	1.01186	1.18483	1.24317	1.44635	1.66182	1.87523	2.34007	2.67155	3.54859	6.95644	43.7133
0.030411	0.0913852	0.152762	0.202638	0.248047	0.27964	0.350791	0.410912	0.477237	0.518687	0.611362	0.737232	0.813541	0.933466	1.01231	1.18503	1.24534	1.44635	1.66395	1.87962	2.34007	2.67155	3.55149	7.01583	43.797
0.030546	0.0915055	0.153087	0.202831	0.248047	0.279652	0.350791	0.410915	0.477287	0.519549	0.612555	0.737551	0.813784	0.935521	1.01553	1.18543	1.24588	1.44635	1.66395	1.88535	2.34007	2.67155	3.56335	7.02459	44.2122
0.0305855	0.0917012	0.153266	0.202858	0.248047	0.279938	0.350791	0.410915	0.477633	0.519791	0.612945	0.737933	0.814303	0.936645	1.01984	1.18756	1.24793	1.44635	1.66395	1.88581	2.34007	2.67155	3.57738	7.14185	44.2943
0.0307548	0.0918264	0.153381	0.203305	0.248047	0.28017	0.350791	0.411222	0.477796	0.520145	0.613104	0.738166	0.814497	0.939172	1.02253	1.18855	1.25026	1.44635	1.66395	1.88856	2.34012	2.67155	3.58536	7.15906	44.4586
0.030829	0.0918622	0.153714	0.203668	0.248047	0.280183	0.350791	0.411496	0.47867	0.52039	0.613138	0.739231	0.815374	0.939558	1.02272	1.18915	1.25121	1.44635	1.66456	1.88907	2.34103	2.67155	3.6053	7.19336	45.0941
0.0309346	0.0918983	0.153911	0.204172	0.248047	0.280318	0.350791	0.411577	0.478921	0.520988	0.613195	0.739851	0.815388	0.940776	1.02272	1.19028	1.25299	1.44635	1.66536	1.88907	2.346	2.67155	3.60738	7.19336	45.1343
0.0309624	0.0921965	0.154075	0.20423	0.248047	0.28066	0.350791	0.412409	0.479447	0.522919	0.613312	0.740708	0.817143	0.94152	1.02272	1.19122	1.25369	1.44635	1.66649	1.88907	2.34659	2.67155	3.62036	7.37496	45.6757
0.0310289	0.0923881	0.154226	0.204357	0.248047	0.280666	0.350791	0.41256	0.480441	0.5231	0.614877	0.741274	0.818947	0.94315	1.02272	1.19154	1.25491	1.44635	1.66658	1.89296	2.35137	2.67155	3.63324	7.37496	45.7376
0.0310965	0.0924441	0.15436	0.204453	0.248047	0.281296	0.350791	0.412636	0.480864	0.523269	0.615764	0.741494	0.819124	0.945012	1.02272	1.19201	1.25495	1.44635	1.67045	1.89466	2.3514	2.67155	3.63738	7.46205	45.9074
0.0311716	0.0924487	0.154415	0.204605	0.248047	0.281467	0.350791	0.412839	0.481039	0.523594	0.616057	0.742289	0.819174	0.94547	1.02272	1.19532	1.25666	1.44635	1.67083	1.89654	2.35318	2.67155	3.63905	7.5005	45.9657
0.0313181	0.0924933	0.154464	0.20469	0.248047	0.281842	0.350791	0.412973	0.481498	0.524	0.616657	0.7434	0.81947	0.945776	1.02272	1.19737	1.25689	1.44653	1.67201	1.89904	2.35318	2.67155	3.64082	7.55627	46.166
0.0313757	0.0926272	0.155373	0.204727	0.248047	0.28236	0.350791	0.413988	0.481798	0.524031	0.617442	0.743911	0.819518	0.945919	1.02272	1.19909	1.26009	1.44669	1.67221	1.90338	2.35455	2.67155	3.64131	7.56035	46.2326
0.0314472	0.0926561	0.155402	0.20477	0.248047	0.282577	0.350791	0.414169	0.482489	0.524538	0.617632	0.744141	0.820357	0.947117	1.02282	1.20107	1.26054	1.44672	1.67305	1.90668	2.35777	2.67155	3.6626	7.60902	46.4173
0.0316262	0.092699	0.155562	0.204836	0.248047	0.282717	0.350791	0.41465	0.4827	0.525843	0.619215	0.744141	0.820917	0.947172	1.02312	1.20195	1.26322	1.45269	1.67317	1.9097	2.36021	2.67241	3.66267	7.65738	46.6038
0.0317289	0.0929459	0.155719	0.204846	0.248047	0.283245	0.350791	0.415048	0.48388	0.526801	0.619636	0.744141	0.821447	0.947177	1.02408	1.20404	1.26335	1.45312	1.67345	1.91066	2.36196	2.6749	3.66788	7.69345	46.615
0.0318344	0.0930005	0.155765	0.20493	0.248047	0.283357	0.350791	0.41516	0.484466	0.527471	0.61987	0.744141	0.823353	0.947208	1.0255	1.21206	1.2648	1.45671	1.67614	1.92781	2.36585	2.67763	3.67916	7.74923	46.6387
0.0319297	0.0932664	0.155903	0.205232	0.248047	0.283493	0.350791	0.415784	0.484604	0.527583	0.621805	0.744141	0.823436	0.94813	1.02626	1.2141	1.2648	1.4586	1.68078	1.93369	2.36594	2.67882	3.685	7.84244	46.6862
0.0319916	0.093304	0.155925	0.205287	0.248047	0.283625	0.350791	0.416302	0.484933	0.528774	0.62223	0.744141	0.824095	0.948179	1.02861	1.21445	1.2648	1.45997	1.68107	1.93726	2.36617	2.6794	3.68748	7.84477	46.733
0.0321996	0.093321	0.156012	0.205581	0.248047	0.283632	0.350791	0.41631	0.486492	0.528831	0.622907	0.744141	0.824117	0.948344	1.03104	1.21489	1.2648	1.46206	1.68206	1.93731	2.36955	2.6811	3.68748	7.91421	46.8283
0.0322282	0.093528	0.156196	0.205631	0.248047	0.284614	0.350791	0.417227	0.487207	0.528905	0.624102	0.744141	0.824251	0.94911	1.03511	1.21564	1.2648	1.4629	1.6839	1.93731	2.37512	2.68304	3.69024	7.94137	47.1315
0.0322461	0.093636	0.156216	0.205679	0.248047	0.284719	0.350791	0.417258	0.487824	0.529749	0.62548	0.744141	0.825744	0.950149	1.03866	1.21568	1.2648	1.46313	1.68513	1.93731	2.38436	2.68304	3.69456	7.94137	47.4003
0.0323092	0.0937513	0.156313	0.205884	0.248047	0.285087	0.350791	0.417604	0.488365	0.530226	0.625559	0.744141	0.826012	0.95138	1.04126	1.21575	1.2648	1.46339	1.68528	1.93731	2.39655	2.68309	3.71084	7.98773	47.7076
0.0323853	0.0938051	0.156537	0.205996	0.248047	0.28511	0.350935	0.417623	0.488865	0.530416	0.626945	0.744141	0.830149	0.951596	1.04195	1.21664	1.2648	1.46579	1.68794	1.93731	2.39657	2.69712	3.7341	8.01464	48.162
0.0323894	0.0938743	0.156792	0.206003	0.248047	0.285145	0.351137	0.417702	0.489143	0.530884	0.62709	0.744141	0.830386	0.952541	1.04265	1.21728	1.2648	1.46615	1.68968	1.93731	2.39711	2.70279	3.73723	8.07963	48.8709
0.0323946	0.0939244	0.156907	0.206101	0.248047	0.285931	0.351468	0.417865	0.489707	0.530949	0.627441	0.744141	0.830578	0.953938	1.04836	1.22062	1.2648	1.46805	1.69051	1.93731	2.4062	2.71195	3.74526	8.11003	49.0569
0.0324716	0.0939918	0.156931	0.206156	0.248047	0.286067	0.351685	0.417955	0.489909	0.531856	0.627508	0.744141	0.830941	0.954908	1.04861	1.22165	1.2648	1.46924	1.69422	1.93736	2.40686	2.71201	3.74553	8.18555	49.1534
0.0326446	0.0943258	0.156966	0.20619	0.248047	0.286094	0.352229	0.41801	0.489945	0.531912	0.62776	0.744141	0.830989	0.955302	1.05029	1.22175	1.2648	1.4702	1.69533	1.93902	2.40857	2.71296	3.74781	8.21181	49.6986
0.0326587	0.094399	0.156978	0.206711	0.248047	0.28614	0.352546	0.418518	0.490195	0.53262	0.630361	0.744141	0.835792	0.956337	1.0511	1.22348	1.2648	1.47116	1.69813	1.94491	2.41036	2.71307	3.74911	8.31975	49.7512
0.0327481	0.0944407	0.157227	0.206844	0.248047	0.286272	0.352877	0.418904	0.490244	0.534254	0.630425	0.744141	0.836798	0.95833	1.05167	1.22497	1.2648	1.47189	1.70191	1.95438	2.41767	2.72232	3.75186	8.31975	50.403
0.0328587	0.0945072	0.157242	0.207207	0.248047	0.286341	0.352993	0.419234	0.490678	0.535136	0.630696	0.744141	0.838974	0.958405	1.05183	1.22556	1.2648	1.4727	1.7032	1.95672	2.42346	2.72437	3.75848	8.49565	50.7533
0.032945	0.0947787	0.157321	0.20729	0.248047	0.286618	0.353084	0.419241	0.490689	0.535811	0.630723	0.744141	0.841279	0.959064	1.05219	1.22606	1.2648	1.47607	1.7041	1.96392	2.42694	2.7268	3.75951	8.55312	50.7988
0.0329692	0.0950561	0.157395	0.208461	0.248047	0.286619	0.353686	0.419273	0.490878	0.535958	0.631162	0.744141	0.841473	0.959723	1.05237	1.22702	1.2658	1.47677	1.71081	1.96591	2.42989	2.738	3.77172	8.56764	51.4415
0.033144	0.0951897	0.157663	0.208563	0.248047	0.28747	0.354242	0.419323	0.492718	0.536346	0.632133	0.744141	0.843685	0.960269	1.05237	1.22808	1.26914	1.48121	1.71197	1.97475	2.43071	2.74296	3.77673	8.72406	51.6152
0.0332087	0.0953741	0.157692	0.208752	0.248047	0.287474	0.354356	0.419692	0.49316	0.537533	0.632175	0.744141	0.844869	0.96039	1.05237	1.22808	1.27916	1.48375	1.71214	1.98438	2.43244	2.74483	3.78075	8.8141	51.9011
0.0332239	0.0957551	0.157733	0.208761	0.248047	0.287714	0.354597	0.420289	0.493198	0.537749	0.632506	0.744141	0.845459	0.96074	1.05292	1.22928	1.28415	1.48408	1.71395	1.98438	2.43375	2.76435	3.78785	8.83579	52.1589
0.0332404	0.0957657	0.157855	0.208976	0.248047	0.288249	0.354844	0.420819	0.495458	0.537923	0.632697	0.744141	0.846044	0.961131	1.05355	1.2301	1.28477	1.48441	1.71524	1.98438	2.44014	2.7659	3.7929	8.93602	52.2538
0.0332542	0.095776	0.157889	0.208989	0.248047	0.288458	0.354974	0.420885	0.495755	0.53913	0.633176	0.744141	0.846449	0.963115	1.05615	1.23148	1.28597	1.48501	1.71622	1.98438	2.44038	2.76867	3.81487	8.95489	52.5865
0.0336899	0.0957934	0.158025	0.20932	0.248047	0.288627	0.355699	0.421061	0.496094	0.539412	0.633176	0.744141	0.846881	0.963239	1.05641	1.23203	1.28745	1.48541	1.71985	1.98438	2.44095	2.77325	3.81533	8.95623	52.7133
0.03371	0.095856	0.158421	0.210019	0.248047	0.288932	0.356544	0.421252	0.496094	0.53965	0.633291	0.744141	0.847936	0.966441	1.059	1.2321	1.29111	1.4857	1.72074	1.98438	2.44298	2.77325	3.82224	9.01577	53.6476
0.0337672	0.0958682	0.15851	0.21022	0.248047	0.289287	0.356917	0.421903	0.496094	0.539878	0.633579	0.744141	0.849195	0.9672	1.06052	1.23341	1.29353	1.48664	1.72633	1.98438	2.44298	2.77325	3.82511	9.02904	53.6814
0.0338348	0.0960512	0.159024	0.210725	0.248047	0.290391	0.357241	0.421961	0.496094	0.540175	0.633798	0.744141	0.85055	0.967413	1.06061	1.23349	1.29949	1.48828	1.72683	1.98438	2.44298	2.77325	3.83573	9.16231	54.4009
0.034036	0.0961214	0.159079	0.210783	0.248047	0.290768	0.3574	0.422436	0.496094	0.540186	0.634107	0.744141	0.850667	0.968622	1.06077	1.23515	1.30389	1.48828	1.72909	1.98438	2.44298	2.77325	3.84187	9.32406	54.5619
0.0344406	0.0961874	0.159222	0.210852	0.248047	0.290787	0.357447	0.422857	0.496094	0.541416	0.635741	0.744141	0.850803	0.969361	1.06142	1.23546	1.30446	1.48828	1.72961	1.98438	2.44298	2.77325	3.84573	9.57474	54.6267
0.0346884	0.0962218	0.159297	0.211065	0.248047	0.291415	0.357885	0.422901	0.496094	0.541758	0.636062	0.744141	0.852334	0.9695	1.06362	1.23598	1.30465	1.48828	1.72994	1.99031	2.44309	2.77325	3.84901	9.7467	54.9327
0.0348435	0.0963759	0.159326	0.211066	0.248047	0.291624	0.358318	0.422911	0.496094	0.54448	0.636376	0.744141	0.85339	0.970365	1.06363	1.23822	1.30565	1.48828	1.73019	1.99404	2.45554	2.77325	3.85072	9.82842	54.9462
0.0349449	0.0966398	0.159479	0.211159	0.248047	0.291816	0.358331	0.423181	0.496094	0.544515	0.637809	0.744141	0.853929	0.971575	1.06426	1.24023	1.30574	1.48828	1.73099	1.9969	2.45781	2.77325	3.87351	10.2272	55.3945
0.0349816	0.0967673	0.159939	0.211326	0.248047	0.291927	0.358563	0.423582	0.496094	0.545743	0.637919	0.744141	0.854328	0.972269	1.06516	1.24023	1.30737	1.48828	1.73484	1.99982	2.46242	2.77325	3.87462	10.2272	55.6626
0.0349915	0.0968032	0.159991	0.21137	0.248047	0.291933	0.358826	0.424204	0.496094	0.545812	0.63866	0.744141	0.854386	0.975126	1.06568	1.24023	1.30783	1.48828	1.73633	1.99982	2.4667	2.77325	3.87462	11.1621	55.7085
0.0351065	0.0968835	0.160056	0.211415	0.248047	0.292544	0.358853	0.424358	0.496094	0.546857	0.640523	0.744141	0.855225	0.976278	1.06586	1.24023	1.30829	1.48828	1.73633	1.99982	2.47529	2.77325	3.8754	11.2308	56.0284
0.0351387	0.0974834	0.160182	0.211687	0.248047	0.292735	0.359104	0.424514	0.496094	0.547978	0.640642	0.744141	0.856142	0.977362	1.06764	1.24023	1.30968	1.48828	1.73633	1.99982	2.47554	2.77325	3.88226	11.4129	56.1863
0.035179	0.0975271	0.160303	0.211729	0.248047	0.292926	0.359309	0.424952	0.496094	0.548484	0.641007	0.744141	0.856645	0.979645	1.06897	1.24023	1.31758	1.48828	1.73633	1.99982	2.47879	2.77325	3.88255	11.8881	56.7507
0.0352246	0.0982204	0.16034	0.211822	0.248047	0.293144	0.359342	0.425226	0.496094	0.548535	0.641955	0.744141	0.857445	0.97994	1.07263	1.24023	1.31855	1.48828	1.73633	1.99982	2.48047	2.77325	3.88595	12.1112	56.9088
0.0352761	0.0982893	0.160401	0.211925	0.248047	0.293156	0.359575	0.425609	0.496094	0.548645	0.642746	0.744141	0.85778	0.979994	1.07338	1.24023	1.31953	1.48828	1.73633	2.00072	2.48047	2.77325	3.89294	12.4741	57.338
0.0354709	0.0983628	0.160417	0.212454	0.248047	0.293739	0.359924	0.425748	0.496094	0.549391	0.643163	0.744141	0.858412	0.980565	1.07613	1.24023	1.31976	1.48843	1.73633	2.00116	2.48047	2.77325	3.9085	13.0219	57.4725
0.0355828	0.0985046	0.16045	0.212493	0.248047	0.293979	0.360053	0.426039	0.496094	0.549453	0.644147	0.744141	0.859518	0.980848	1.07898	1.24023	1.32265	1.48912	1.73633	2.00329	2.48047	2.77325	3.91148	13.2676	58.3042
0.0357738	0.0986542	0.160502	0.21252	0.248047	0.294313	0.360115	0.426086	0.496094	0.549472	0.644826	0.744141	0.860077	0.980868	1.08213	1.24023	1.32293	1.48973	1.73633	2.00485	2.48047	2.77325	3.91712	13.2792	58.4096
0.0358136	0.0986925	0.160505	0.212587	0.248047	0.294581	0.36102	0.426573	0.496094	0.550958	0.645371	0.744141	0.860146	0.981342	1.08234	1.24023	1.32398	1.49088	1.73633	2.01216	2.48047	2.77325	3.92197	13.4998	59.3848
0.0361683	0.0988566	0.160519	0.213609	0.248047	0.294644	0.361339	0.427225	0.496094	0.551814	0.646306	0.744141	0.860163	0.983281	1.08238	1.24023	1.32653	1.49283	1.73826	2.01338	2.48047	2.77325	3.92197	13.4998	59.3973
0.0364	0.0988622	0.160876	0.213731	0.248047	0.294892	0.361783	0.427782	0.496094	0.552157	0.646507	0.744141	0.861017	0.983791	1.0824	1.24023	1.327	1.49329	1.74166	2.01595	2.48047	2.79179	3.92541	13.5702	59.6061
0.0364439	0.0988839	0.160915	0.213894	0.248047	0.295036	0.362773	0.428219	0.496094	0.55465	0.646623	0.744141	0.861751	0.984357	1.08332	1.24023	1.32771	1.4941	1.74251	2.02128	2.48047	2.79617	3.92601	13.8196	59.8801
0.0364878	0.0989182	0.161082	0.213971	0.248047	0.295502	0.363147	0.429273	0.496094	0.55465	0.646722	0.744141	0.861854	0.985115	1.08966	1.24023	1.33116	1.49601	1.74372	2.02159	2.48047	2.79945	3.94369	13.8196	60.3223
0.036496	0.0990726	0.161359	0.214582	0.248047	0.295562	0.363284	0.429691	0.496094	0.55465	0.647529	0.744141	0.864386	0.985381	1.09044	1.24023	1.33155	1.49856	1.7475	2.02954	2.48047	2.80633	3.94912	13.9657	61.1188
0.036501	0.0992046	0.16137	0.214645	0.248047	0.295805	0.36377	0.429876	0.496094	0.55465	0.647857	0.744141	0.86683	0.98543	1.09162	1.24023	1.33373	1.49939	1.74768	2.03341	2.48047	2.81915	3.96068	13.9701	63.6166
0.036577	0.0992349	0.16153	0.214867	0.248047	0.296426	0.363789	0.430486	0.496094	0.55465	0.648946	0.744988	0.867477	0.987077	1.09208	1.24023	1.33577	1.49984	1.74803	2.03403	2.48047	2.82065	3.97649	14.0514	63.7794
0.0365878	0.099238	0.161678	0.214918	0.248047	0.296536	0.36473	0.43053	0.496094	0.55465	0.64909	0.745905	0.867855	0.987518	1.09511	1.24023	1.33577	1.5004	1.75294	2.04026	2.48047	2.82442	3.97754	14.0514	66.2392
0.0366186	0.0994545	0.161854	0.214958	0.248047	0.296965	0.365175	0.430939	0.496094	0.55465	0.649434	0.745933	0.868208	0.988201	1.09719	1.24023	1.33577	1.50199	1.75356	2.04342	2.48047	2.82817	3.97837	14.1191	66.7025
0.0367884	0.0996161	0.16191	0.215014	0.248047	0.297181	0.365196	0.43103	0.496094	0.55465	0.650125	0.74647	0.870262	0.992188	1.09824	1.24023	1.33577	1.50409	1.75396	2.04545	2.48047	2.83831	3.98075	14.2837	67.5694
0.0368233	0.0996273	0.161921	0.215064	0.248047	0.297497	0.365622	0.431402	0.496094	0.55465	0.650423	0.747874	0.871171	0.992188	1.10026	1.24023	1.33577	1.50448	1.75396	2.04545	2.48047	2.84696	3.99964	14.2837	67.9055
0.0368398	0.0996628	0.162043	0.215457	0.248047	0.297764	0.365788	0.431524	0.496094	0.55465	0.650958	0.748362	0.871314	0.992188	1.10168	1.24023	1.33577	1.50832	1.75396	2.05469	2.48047	2.84757	4.01351	14.3717	68.1402
0.0368523	0.0997522	0.162088	0.215743	0.248047	0.29827	0.366094	0.43192	0.496094	0.55465	0.651207	0.748531	0.871597	0.992188	1.10278	1.24023	1.33577	1.50881	1.75396	2.05613	2.48047	2.85485	4.02546	14.4337	68.2309
0.036879	0.100064	0.162118	0.215789	0.248047	0.298637	0.366405	0.432145	0.496094	0.55465	0.65156	0.751298	0.871665	0.992188	1.10362	1.24023	1.33577	1.50881	1.75396	2.06016	2.48047	2.86204	4.03504	14.5166	68.3445
0.0369184	0.10007	0.162168	0.215915	0.248047	0.298738	0.36681	0.432596	0.496094	0.55465	0.652659	0.751355	0.872048	0.992188	1.10413	1.24023	1.33577	1.50881	1.75396	2.06407	2.48047	2.87934	4.03879	14.5166	68.5624
0.0370963	0.100192	0.162235	0.216122	0.248047	0.298758	0.367218	0.432751	0.496094	0.55465	0.653128	0.75223	0.87446	0.992188	1.1048	1.24023	1.33577	1.50881	1.75396	2.07106	2.48047	2.88125	4.04136	14.5166	68.7918
0.037118	0.100206	0.162359	0.216201	0.248047	0.298848	0.367253	0.432931	0.496094	0.55465	0.657311	0.752475	0.876138	0.992188	1.10485	1.24023	1.33577	1.50881	1.75396	2.07423	2.48047	2.8829	4.04793	14.5927	69.6906
0.0371501	0.10021	0.162413	0.216359	0.248047	0.298881	0.367289	0.433403	0.496094	0.55465	0.657718	0.752623	0.876515	0.992188	1.10838	1.24023	1.33577	1.50881	1.75396	2.0759	2.48047	2.88645	4.04995	14.8911	70.1109
0.0371584	0.100274	0.162415	0.216616	0.248047	0.298891	0.367342	0.434542	0.496094	0.55465	0.658778	0.752789	0.876569	0.992188	1.10922	1.24023	1.33577	1.50881	1.75396	2.07712	2.48047	2.8927	4.06003	15.4985	70.3933
0.0372537	0.100437	0.162489	0.216688	0.248047	0.299039	0.367594	0.43568	0.496094	0.55465	0.658917	0.757752	0.87712	0.992188	1.1093	1.24023	1.33577	1.50881	1.75396	2.07928	2.48047	2.8927	4.06827	15.5698	71.552
0.0373393	0.100439	0.162529	0.217452	0.248047	0.299545	0.367678	0.436076	0.496094	0.55465	0.659686	0.760296	0.878285	0.992188	1.1093	1.24023	1.33577	1.50881	1.75396	2.08323	2.48047	2.8927	4.06827	15.5698	71.9661
0.0374756	0.100484	0.162555	0.217469	0.248047	0.299856	0.367992	0.436578	0.496094	0.55465	0.661058	0.760831	0.878885	0.992188	1.1093	1.24023	1.33577	1.50881	1.75396	2.08671	2.48047	2.8927	4.06827	15.5698	74.1312
0.0375422	0.10065	0.162638	0.217808	0.248047	0.300329	0.368445	0.436669	0.496094	0.55465	0.661217	0.761249	0.881071	0.992188	1.1093	1.24023	1.33577	1.50881	1.75396	2.08958	2.48072	2.92413	4.06827	15.5777	75.4507
0.0376306	0.100673	0.162697	0.217913	0.248047	0.300446	0.368829	0.437075	0.496094	0.55465	0.661715	0.761751	0.881832	0.992188	1.1093	1.24023	1.33577	1.50881	1.75396	2.09406	2.48742	2.92432	4.06827	15.6348	76.0983
0.0377019	0.100984	0.162706	0.217926	0.248047	0.300543	0.369153	0.437135	0.496094	0.55465	0.661816	0.762362	0.881977	0.992188	1.1093	1.24023	1.33577	1.50881	1.75396	2.09802	2.48791	2.94282	4.06827	15.6977	76.6914
0.0378859	0.100984	0.162847	0.218116	0.248047	0.300603	0.369399	0.437191	0.496094	0.55465	0.661889	0.762386	0.882565	0.992188	1.1093	1.24023	1.33577	1.51134	1.75396	2.09806	2.48899	2.94385	4.07858	15.6977
0.0379763	0.101215	0.162867	0.218429	0.248047	0.300684	0.36952	0.438524	0.496094	0.55465	0.66209	0.762429	0.883482	0.992188	1.1093	1.24023	1.33577	1.51139	1.75396	2.10916	2.49284	2.94842	4.09231	15.8284
0.0380123	0.1014	0.162974	0.218733	0.248047	0.300754	0.369748	0.438623	0.496094	0.55465	0.6632	0.762826	0.884475	0.992188	1.1093	1.24023	1.33577	1.51225	1.75396	2.11166	2.49284	2.95444	4.09714	15.8284
0.0380613	0.101502	0.163154	0.219027	0.248047	0.300889	0.370046	0.43866	0.496094	0.55465	0.666073	0.762871	0.885167	0.992188	1.1093	1.24023	1.33577	1.51355	1.75396	2.11363	2.49284	2.95939	4.1205	15.8284
0.0380784	0.101535	0.163309	0.21934	0.248047	0.300908	0.370421	0.440231	0.496094	0.55465	0.66725	0.764211	0.885484	0.992188	1.1093	1.24023	1.33577	1.51418	1.75396	2.11636	2.49284	2.96177	4.12832	15.8692
0.0381509	0.101555	0.163486	0.219406	0.248047	0.300998	0.370628	0.440332	0.496094	0.555595	0.668	0.764735	0.88594	0.992188	1.1093	1.24023	1.33577	1.51472	1.75396	2.11662	2.49284	2.97341	4.13625	15.8924
0.038222	0.101716	0.163641	0.219518	0.248047	0.301045	0.371111	0.440441	0.496094	0.555727	0.668364	0.765086	0.887102	0.992188	1.1093	1.24023	1.33577	1.51953	1.75396	2.11931	2.49284	2.99199	4.13734	16.0331
0.0382718	0.101761	0.163737	0.21958	0.248047	0.301048	0.371309	0.440441	0.496094	0.556187	0.668929	0.765776	0.887359	0.992188	1.1093	1.24023	1.33577	1.52243	1.75396	2.11931	2.49284	3.01275	4.14617	16.1402
0.0383327	0.101771	0.163742	0.219627	0.248047	0.301385	0.372151	0.440543	0.496094	0.55637	0.670157	0.767385	0.8891	0.992188	1.1093	1.24023	1.33577	1.52429	1.75396	2.11931	2.49284	3.02619	4.15424	16.1707
0.0384337	0.101801	0.163796	0.219683	0.248047	0.301398	0.372472	0.441278	0.496094	0.556381	0.670673	0.768328	0.889981	0.992188	1.1093	1.24023	1.33577	1.52541	1.75396	2.11931	2.49284	3.0278	4.15635	16.2731
0.0384928	0.101807	0.163808	0.219791	0.248047	0.301419	0.372752	0.442097	0.496094	0.556966	0.672129	0.769144	0.889987	0.992188	1.1093	1.24023	1.33577	1.52567	1.75396	2.12021	2.49694	3.0278	4.15737	16.3127
0.0386319	0.101887	0.164166	0.220017	0.248047	0.301678	0.372935	0.443179	0.496094	0.55746	0.672592	0.769167	0.890704	0.992188	1.11026	1.24023	1.33577	1.53013	1.75396	2.123	2.50166	3.0278	4.18081	16.3354
0.0386989	0.101942	0.164265	0.220277	0.248047	0.301747	0.373161	0.444348	0.496094	0.557758	0.672761	0.769286	0.89223	0.992188	1.11079	1.24023	1.33606	1.53145	1.75396	2.13127	2.50518	3.0278	4.2095	16.5133
0.0387021	0.10208	0.164318	0.220586	0.248047	0.302366	0.373246	0.444364	0.496094	0.558316	0.67374	0.770064	0.894346	0.992188	1.11247	1.24023	1.33844	1.53363	1.75396	2.13378	2.51207	3.0278	4.215	16.5598
0.0387829	0.102101	0.164416	0.220704	0.248047	0.302386	0.373251	0.444382	0.496094	0.558545	0.673827	0.771427	0.894346	0.992188	1.11403	1.24023	1.33861	1.53491	1.75396	2.13378	2.51217	3.0278	4.2168	16.6487
0.0388195	0.102137	0.164444	0.220786	0.248047	0.302611	0.373583	0.444419	0.496094	0.558957	0.674468	0.772048	0.894346	0.992188	1.11429	1.24023	1.34148	1.53748	1.75396	2.13378	2.52078	3.0278	4.24061	16.6635
0.0391177	0.10221	0.16465	0.221142	0.248047	0.302822	0.373799	0.444428	0.496094	0.55933	0.676771	0.77347	0.894346	0.992188	1.11476	1.24023	1.34159	1.5378	1.75396	2.13378	2.52082	3.04128	4.26756	16.9436
0.03935	0.102598	0.16466	0.221429	0.248047	0.302898	0.373993	0.444719	0.496094	0.559627	0.678318	0.776583	0.894346	0.992188	1.11601	1.24023	1.34371	1.53826	1.75396	2.13378	2.52103	3.0455	4.31829	16.969
0.0393811	0.102676	0.164763	0.221527	0.248047	0.303082	0.374159	0.444997	0.496094	0.563151	0.678357	0.776789	0.894346	0.992188	1.11642	1.24023	1.3441	1.53913	1.75396	2.13378	2.52307	3.06817	4.33195	17.0161
0.0396103	0.102872	0.16478	0.222084	0.248047	0.303125	0.374196	0.445187	0.496094	0.563177	0.679114	0.778647	0.894346	0.992188	1.12048	1.24023	1.34428	1.53936	1.75396	2.13378	2.52555	3.07663	4.36123	17.3721
0.0396295	0.103058	0.164823	0.222438	0.248047	0.303701	0.374732	0.44565	0.496094	0.563838	0.679143	0.778654	0.894346	0.992188	1.12273	1.24023	1.34621	1.53948	1.75396	2.13378	2.52959	3.08475	4.37651	17.4075
0.0396883	0.10314	0.164846	0.222996	0.248047	0.304137	0.374948	0.446003	0.496094	0.565551	0.679773	0.779638	0.894346	0.992188	1.125	1.24023	1.34622	1.53953	1.75396	2.13378	2.52959	3.10658	4.3954	17.4199
0.0397574	0.103157	0.165231	0.223329	0.248047	0.304526	0.375178	0.446008	0.496094	0.566371	0.679922	0.781647	0.894346	0.992188	1.12504	1.24023	1.34794	1.54059	1.75396	2.13378	2.52959	3.10802	4.42778	17.4763
0.0398287	0.10335	0.165492	0.223427	0.248047	0.30458	0.375571	0.446263	0.496094	0.56665	0.680132	0.782181	0.894346	0.992188	1.12825	1.24023	1.34843	1.54121	1.75396	2.13378	2.52959	3.11678	4.43072	17.5956
0.0399009	0.103763	0.165905	0.223552	0.248047	0.3048	0.376014	0.446427	0.496094	0.567757	0.681101	0.783508	0.894346	0.992188	1.1307	1.24023	1.35053	1.54185	1.75396	2.13472	2.52959	3.12268	4.47173	17.6131
0.0399912	0.103792	0.165933	0.223554	0.248047	0.305182	0.376124	0.447006	0.496094	0.567986	0.681896	0.783833	0.894346	0.992188	1.13073	1.24023	1.35293	1.54308	1.75396	2.13698	2.52959	3.12281	4.47173	17.6811
0.0400275	0.103854	0.166003	0.223841	0.248047	0.305465	0.376227	0.447114	0.496094	0.568233	0.682437	0.783857	0.894346	0.992188	1.13807	1.24023	1.35767	1.54473	1.75396	2.1437	2.53138	3.12956	4.47173	17.7834
0.0400941	0.104606	0.166108	0.224233	0.248047	0.305561	0.376751	0.447584	0.496094	0.569546	0.684695	0.784393	0.895765	0.992188	1.1405	1.24023	1.35787	1.54506	1.75396	2.14456	2.53691	3.13757	4.47173	18.0938
0.0401087	0.104742	0.166277	0.224303	0.248047	0.305613	0.376796	0.447637	0.496094	0.569857	0.684794	0.784393	0.896475	0.992188	1.14077	1.24023	1.35848	1.54589	1.75396	2.14575	2.53734	3.14708	4.47476	18.1685
0.0401685	0.104898	0.166308	0.224429	0.248047	0.306755	0.376909	0.447904	0.496094	0.569876	0.685409	0.784393	0.896678	0.992964	1.14447	1.24023	1.35944	1.54882	1.75396	2.1578	2.5476	3.14766	4.51044	18.2091
0.0401891	0.105232	0.166357	0.224516	0.248047	0.306952	0.377295	0.448103	0.496094	0.570304	0.685438	0.784393	0.897413	0.994315	1.14755	1.24023	1.35995	1.54925	1.75396	2.16101	2.55184	3.14941	4.53686	18.4057
0.0404364	0.105242	0.166376	0.224844	0.248047	0.306962	0.377337	0.448172	0.496094	0.570849	0.685819	0.784393	0.897513	0.9954	1.15104	1.24023	1.36145	1.55039	1.75396	2.16318	2.5538	3.15712	4.55354	18.4357
0.040447	0.105305	0.166435	0.225234	0.248047	0.307136	0.377406	0.448661	0.496094	0.571585	0.68611	0.784393	0.897527	0.997141	1.15174	1.24023	1.36165	1.5511	1.75396	2.16431	2.5538	3.15924	4.56029	18.4374
0.0405086	0.105315	0.166464	0.225355	0.248047	0.307158	0.377681	0.449259	0.496094	0.571751	0.687059	0.784393	0.897668	0.999183	1.15501	1.24023	1.36407	1.55446	1.75396	2.17539	2.5538	3.1643	4.57166	18.4374
0.0405225	0.105327	0.166738	0.225407	0.248047	0.307608	0.377768	0.449445	0.496094	0.572665	0.687832	0.784393	0.897728	0.999797	1.15526	1.24023	1.36782	1.55593	1.75396	2.17581	2.5538	3.17057	4.59393	18.5903
0.0405259	0.105501	0.166781	0.225671	0.248047	0.307655	0.37781	0.449666	0.496912	0.572684	0.688542	0.784393	0.898548	1.0007	1.15527	1.24023	1.36958	1.55951	1.75396	2.17595	2.5538	3.17655	4.61757	18.7156
0.0406428	0.105526	0.166894	0.225727	0.248047	0.307837	0.378331	0.450097	0.49851	0.573499	0.688723	0.784393	0.898831	1.00097	1.15616	1.24023	1.37071	1.561	1.75681	2.18254	2.5538	3.17655	4.61777	18.8025
0.0406786	0.106027	0.16696	0.225794	0.248047	0.308024	0.378342	0.450936	0.498661	0.574924	0.690189	0.784393	0.899907	1.00158	1.15633	1.24023	1.37256	1.56469	1.75797	2.19045	2.5538	3.17655	4.63499	18.8532
0.0408743	0.10618	0.166969	0.225891	0.248047	0.308061	0.378632	0.451127	0.498829	0.575308	0.690267	0.784393	0.902443	1.00316	1.15917	1.24023	1.37634	1.56495	1.75858	2.19173	2.5538	3.17655	4.63879	18.8581
0.0408993	0.106183	0.16707	0.226322	0.248047	0.308539	0.378722	0.451227	0.499031	0.575883	0.690382	0.784393	0.904129	1.00595	1.16094	1.24023	1.37708	1.56879	1.75885	2.19238	2.55654	3.17655	4.67718	18.9849
0.0409106	0.106185	0.167351	0.226323	0.248047	0.308554	0.378937	0.451588	0.499492	0.576106	0.691878	0.784393	0.905613	1.00829	1.16102	1.24023	1.37804	1.56879	1.75937	2.20037	2.55898	3.17655	4.68014	19.0625
0.040995	0.106447	0.167378	0.226493	0.248047	0.308686	0.379126	0.451837	0.499723	0.576964	0.692202	0.784393	0.905972	1.00905	1.1623	1.24023	1.37838	1.56879	1.76239	2.20155	2.5626	3.19103	4.68014	19.196
0.0410413	0.106499	0.167393	0.226731	0.248047	0.30878	0.379475	0.452079	0.499811	0.578084	0.692945	0.784393	0.908166	1.01429	1.16425	1.24023	1.38493	1.56879	1.76305	2.2058	2.56374	3.22461	4.77128	19.6944
0.0410778	0.106555	0.167466	0.226888	0.248047	0.308841	0.379658	0.452517	0.499979	0.578521	0.693318	0.784393	0.908403	1.01473	1.16457	1.24023	1.38546	1.56879	1.76728	2.21013	2.56692	3.22934	4.79463	19.8205
0.0410847	0.107046	0.167696	0.227268	0.248047	0.308842	0.379676	0.45421	0.500659	0.57973	0.693914	0.784393	0.909974	1.0148	1.16478	1.24023	1.38546	1.56879	1.77071	2.2186	2.56706	3.23577	4.79693	20.1056
0.0411148	0.107147	0.167705	0.22744	0.248047	0.310453	0.379684	0.45431	0.500733	0.580027	0.694292	0.787013	0.911036	1.01553	1.16522	1.24023	1.3859	1.56879	1.77078	2.22092	2.5791	3.23878	4.82395	20.6997
0.041155	0.107336	0.167914	0.227491	0.248047	0.311175	0.379789	0.454541	0.500932	0.580372	0.694576	0.790855	0.911544	1.01556	1.16791	1.24023	1.39263	1.56879	1.77369	2.23242	2.58069	3.24278	4.85376	20.8034
0.041395	0.107373	0.168088	0.227565	0.248047	0.311258	0.380074	0.455215	0.501035	0.581299	0.694738	0.792154	0.912277	1.01567	1.1704	1.24023	1.39329	1.57118	1.77556	2.23242	2.58523	3.24721	4.85377	20.9434
0.0413982	0.10758	0.168171	0.227631	0.248047	0.31142	0.380173	0.455256	0.501264	0.581763	0.695521	0.793194	0.912629	1.01596	1.1712	1.24023	1.39332	1.57152	1.7798	2.23242	2.58969	3.25272	4.86595	21.3407
0.0413995	0.10778	0.168244	0.227656	0.248047	0.311586	0.381219	0.455592	0.501288	0.583015	0.697053	0.793388	0.912861	1.01623	1.1721	1.24023	1.39845	1.57284	1.78095	2.23242	2.58969	3.27348	4.88121	21.4327
0.0414991	0.107853	0.168304	0.228184	0.248047	0.312205	0.381556	0.455874	0.501364	0.583114	0.698176	0.793806	0.914301	1.01992	1.1738	1.24023	1.39853	1.57438	1.78132	2.23242	2.58969	3.28326	4.88245	21.7278
0.0414997	0.107862	0.168331	0.22898	0.248047	0.312259	0.381763	0.456089	0.50189	0.584834	0.699936	0.79401	0.914319	1.02257	1.17505	1.24023	1.39874	1.58666	1.78706	2.23242	2.58969	3.29465	4.89225	21.7335
0.0418843	0.107873	0.169048	0.229064	0.248047	0.312834	0.381857	0.45652	0.502702	0.585134	0.699968	0.795259	0.914332	1.02272	1.17614	1.24023	1.39993	1.58749	1.7886	2.23242	2.58969	3.32771	4.89225	21.7519
0.0421391	0.107949	0.169096	0.229875	0.248047	0.313016	0.381883	0.456815	0.503159	0.585343	0.700186	0.796513	0.915751	1.02272	1.17672	1.24023	1.40122	1.58827	1.78869	2.23242	2.58969	3.3279	4.93881	22.2815
0.0427161	0.107981	0.169174	0.230119	0.248047	0.313357	0.38192	0.457714	0.504091	0.586544	0.700791	0.797658	0.91743	1.02272	1.17833	1.24023	1.40206	1.58827	1.78869	2.24589	2.58969	3.33713	4.97302	22.2856
0.0428822	0.108129	0.169525	0.230483	0.248047	0.313495	0.382083	0.458608	0.504655	0.587464	0.701091	0.798458	0.918159	1.02272	1.17883	1.24023	1.4031	1.58827	1.78869	2.24616	2.58969	3.33713	4.98568	22.3738
0.0429094	0.108501	0.169759	0.230494	0.248047	0.313724	0.382377	0.459588	0.50542	0.587731	0.701583	0.800242	0.918162	1.02272	1.17901	1.24023	1.40315	1.58827	1.78869	2.24616	2.58969	3.33713	4.98894	22.4739
0.0433204	0.108667	0.16992	0.231251	0.248047	0.314432	0.382473	0.46034	0.50555	0.588495	0.701583	0.800551	0.919042	1.02272	1.1801	1.24023	1.40315	1.58827	1.78869	2.24616	2.58969	3.33713	5.02174	22.8122
0.0433284	0.10883	0.170365	0.231407	0.248047	0.314587	0.383059	0.460874	0.506225	0.588612	0.701583	0.801604	0.919332	1.02272	1.18054	1.24023	1.40317	1.58827	1.78869	2.24616	2.59375	3.33713	5.03074	23.019
0.0433488	0.108843	0.170375	0.231495	0.248047	0.314749	0.383559	0.460939	0.506314	0.589114	0.701583	0.803332	0.919985	1.02272	1.1811	1.24023	1.40317	1.58827	1.78869	2.24616	2.59455	3.34374	5.04447	23.3441
0.0433827	0.108843	0.170409	0.23167	0.248047	0.314983	0.383865	0.461417	0.506345	0.589191	0.701583	0.805562	0.920167	1.02272	1.18184	1.24023	1.40317	1.58827	1.7944	2.24616	2.59734	3.34613	5.07273	23.3441
0.0434169	0.108863	0.170531	0.231678	0.248047	0.315588	0.384017	0.461517	0.506857	0.590086	0.702654	0.805583	0.920733	1.02272	1.18266	1.24023	1.40317	1.58827	1.80075	2.24623	2.60345	3.36798	5.0895	23.3665
0.0434587	0.109021	0.170995	0.231756	0.248047	0.315948	0.384387	0.461671	0.506875	0.591197	0.702829	0.806627	0.920851	1.02272	1.18423	1.24023	1.40317	1.58827	1.80105	2.24669	2.60378	3.36866	5.10562	23.5174
0.0434594	0.109342	0.171177	0.232224	0.248047	0.316089	0.384502	0.462015	0.507234	0.591449	0.703711	0.807484	0.921897	1.02272	1.18519	1.24023	1.406	1.58827	1.80581	2.255	2.60951	3.38253	5.1076	23.5266
0.0435068	0.109399	0.171192	0.232265	0.248047	0.316228	0.384668	0.462865	0.507421	0.591852	0.704252	0.807706	0.923031	1.02272	1.18763	1.24023	1.40707	1.58827	1.80581	2.26212	2.6122	3.3905	5.1076	24.4612
0.0435536	0.10942	0.171482	0.232278	0.248047	0.316944	0.384724	0.463005	0.507592	0.59199	0.705064	0.808157	0.924075	1.02272	1.18851	1.24023	1.40713	1.58827	1.80581	2.26379	2.6145	3.42093	5.1076	24.7612
0.0435965	0.109426	0.1715	0.232596	0.248143	0.317099	0.385102	0.463186	0.507829	0.593131	0.706757	0.809198	0.924572	1.02272	1.18902	1.24023	1.40932	1.58827	1.80581	2.26524	2.61591	3.43289	5.13185	25.2594
0.0436416	0.109776	0.171518	0.232939	0.248179	0.317484	0.385526	0.463558	0.508966	0.593724	0.706853	0.809537	0.925102	1.02447	1.19328	1.24023	1.4097	1.58827	1.80581	2.26603	2.61635	3.43739	5.1457	25.4039
0.0437161	0.109882	0.171629	0.233012	0.24852	0.31802	0.385634	0.463711	0.509194	0.594485	0.708288	0.810156	0.925273	1.02486	1.1947	1.24023	1.40978	1.58827	1.80581	2.26793	2.61787	3.44253	5.15019	25.5681
0.0438005	0.109961	0.171773	0.233044	0.249407	0.318656	0.385701	0.464101	0.509249	0.595855	0.710016	0.810373	0.925679	1.02533	1.19596	1.24023	1.40996	1.58827	1.80581	2.26951	2.61987	3.44598	5.32579	25.8314
0.0438759	0.11027	0.171827	0.233179	0.249753	0.318669	0.385937	0.464489	0.509696	0.596338	0.710192	0.81088	0.925733	1.02539	1.19841	1.24023	1.41044	1.58827	1.80682	2.27347	2.62032	3.44903	5.32579	26.1487
0.0438996	0.110315	0.171834	0.233831	0.250505	0.319084	0.386103	0.466035	0.509885	0.597033	0.711322	0.811588	0.92663	1.0267	1.19932	1.24023	1.41069	1.58827	1.8088	2.27621	2.62685	3.45998	5.3334	26.2145
0.0440247	0.110392	0.171854	0.233924	0.25053	0.320006	0.386375	0.466097	0.511004	0.597295	0.711645	0.812108	0.928122	1.0282	1.19968	1.24023	1.41139	1.58827	1.80969	2.28688	2.62974	3.47115	5.5465	26.2192
0.0440369	0.11053	0.172086	0.234077	0.250651	0.320119	0.387089	0.46637	0.511091	0.597952	0.712631	0.813049	0.929281	1.02832	1.20264	1.24023	1.41265	1.58827	1.80971	2.28688	2.63044	3.47389	5.5465	26.4853
0.0441025	0.110553	0.172101	0.23422	0.250828	0.320197	0.387229	0.468186	0.512619	0.59907	0.712721	0.81355	0.934959	1.02859	1.20307	1.24023	1.41283	1.58827	1.81078	2.28688	2.63667	3.47725	5.62361	26.6624
0.0441086	0.110612	0.172124	0.234357	0.251034	0.320649	0.387687	0.468936	0.512709	0.599472	0.712957	0.814231	0.9351	1.02885	1.20324	1.24023	1.41361	1.58827	1.81234	2.28688	2.63677	3.495	5.81192	26.6694
0.0442432	0.110957	0.172154	0.234561	0.251615	0.320708	0.387872	0.468953	0.512896	0.600038	0.713188	0.814264	0.935234	1.02965	1.20537	1.24023	1.41373	1.58827	1.81239	2.28688	2.63677	3.5052	5.81192	26.7155
0.0442442	0.111597	0.1722	0.234629	0.25174	0.321698	0.387888	0.469132	0.514674	0.600179	0.713645	0.814357	0.936582	1.03187	1.20639	1.24023	1.41772	1.58827	1.81268	2.28688	2.63799	3.50791	5.81192	27.02
0.0442875	0.111612	0.172282	0.234671	0.252087	0.322132	0.387903	0.469206	0.514969	0.600257	0.714458	0.814862	0.93857	1.0333	1.20778	1.24023	1.41774	1.58827	1.81448	2.29672	2.65162	3.50791	5.89601	28.5211
0.0443012	0.111628	0.172394	0.234676	0.252245	0.322326	0.388207	0.469406	0.515566	0.601202	0.714692	0.815299	0.939127	1.03606	1.20823	1.24023	1.4182	1.58827	1.82317	2.29731	2.66513	3.50791	5.97376	28.6545
0.0443943	0.111979	0.172624	0.23507	0.252281	0.322397	0.388337	0.470149	0.51633	0.601378	0.714856	0.815457	0.942349	1.0365	1.20913	1.24023	1.42117	1.58827	1.82779	2.30067	2.66731	3.50791	6.04034	29.2916
0.0444918	0.112144	0.172745	0.235097	0.252404	0.322878	0.388917	0.47053	0.517254	0.601438	0.715726	0.817555	0.943738	1.03705	1.20949	1.24023	1.42129	1.58827	1.83503	2.30746	2.67032	3.50791	6.08007	29.6745
0.0445147	0.112218	0.172884	0.23524	0.25241	0.323607	0.389306	0.471449	0.517813	0.601792	0.716066	0.817587	0.944187	1.04	1.2114	1.24023	1.4232	1.58827	1.84398	2.30986	2.67068	3.50791	6.14135	30.0986
0.0447262	0.112595	0.172938	0.235401	0.252625	0.323881	0.389514	0.47152	0.518765	0.603012	0.716195	0.817848	0.944317	1.04106	1.21259	1.24023	1.42462	1.58982	1.84541	2.31696	2.67085	3.52941	6.27514	30.6104
0.044769	0.112612	0.173022	0.235574	0.253004	0.324046	0.389787	0.471805	0.520786	0.603168	0.716368	0.818355	0.94461	1.04223	1.21261	1.24023	1.42485	1.59699	1.84835	2.31725	2.67155	3.55546	6.28005	30.8158
0.0447726	0.112632	0.173355	0.235671	0.253117	0.324107	0.389999	0.472168	0.522019	0.603754	0.716811	0.819721	0.945284	1.04275	1.21317	1.24023	1.42505	1.59782	1.85609	2.32976	2.67155	3.5643	6.28046	30.9105
0.0448363	0.112754	0.173365	0.235686	0.253276	0.32438	0.390226	0.472618	0.522164	0.604562	0.717175	0.821447	0.94556	1.04299	1.21417	1.24023	1.42627	1.60032	1.85707	2.33235	2.67155	3.57002	6.31424	31.0544
0.0448389	0.112905	0.173537	0.23569	0.253302	0.324448	0.391144	0.472979	0.522256	0.605079	0.717916	0.82162	0.945805	1.04368	1.2168	1.24023	1.42903	1.60378	1.85764	2.34007	2.67155	3.57169	6.46827	31.5498
0.0448495	0.113064	0.173556	0.235825	0.253429	0.324609	0.391235	0.473088	0.52255	0.606252	0.71794	0.822079	0.946694	1.04439	1.2184	1.24182	1.42978	1.60566	1.87065	2.34007	2.67155	3.58141	6.51094	31.7703
0.0448499	0.113144	0.173671	0.236546	0.253861	0.324692	0.391412	0.473149	0.523064	0.606635	0.718033	0.822985	0.946761	1.04501	1.21991	1.24571	1.43084	1.60619	1.87073	2.34007	2.67155	3.58743	6.51094	32.0221
0.0448828	0.113187	0.173672	0.236625	0.253913	0.32475	0.391868	0.473291	0.523132	0.606733	0.718125	0.823322	0.947174	1.04926	1.22086	1.24641	1.43095	1.60674	1.87589	2.34007	2.67155	3.5984	6.67887	32.0979
0.044898	0.113311	0.174082	0.236687	0.254927	0.324913	0.392317	0.473326	0.523395	0.60722	0.718717	0.823963	0.947336	1.04973	1.22184	1.24821	1.43172	1.61144	1.87696	2.34007	2.67155	3.60767	6.67887	32.2156
0.0450034	0.113435	0.174161	0.236729	0.255171	0.325015	0.393491	0.473387	0.523433	0.607441	0.719098	0.824309	0.948619	1.05124	1.22339	1.24908	1.43205	1.61194	1.88534	2.34007	2.67155	3.62411	6.67887	32.2461
0.0450273	0.113621	0.174204	0.236951	0.255209	0.325814	0.393648	0.473571	0.525136	0.608525	0.719683	0.824849	0.948632	1.05164	1.22401	1.25164	1.43239	1.61213	1.88907	2.34007	2.67155	3.62525	6.67887	32.2747
0.0450314	0.113761	0.174353	0.23696	0.255304	0.325871	0.393791	0.474193	0.525461	0.609588	0.720436	0.82524	0.948654	1.05237	1.22504	1.25527	1.43274	1.61242	1.88907	2.34007	2.67155	3.62851	6.67887	32.3499
0.0450663	0.113827	0.174474	0.237141	0.255419	0.325899	0.393876	0.4742	0.525579	0.609589	0.720474	0.825358	0.949517	1.05237	1.22518	1.256	1.43419	1.61407	1.88949	2.34007	2.67155	3.6315	6.78431	32.4325
0.045077	0.113834	0.174521	0.237171	0.256074	0.32591	0.394402	0.474951	0.525725	0.609978	0.721869	0.825412	0.949693	1.05237	1.22603	1.25696	1.43693	1.61545	1.89668	2.34007	2.67155	3.63571	6.84268	32.5027
0.0450826	0.114041	0.174775	0.237233	0.256111	0.325919	0.394735	0.476349	0.52577	0.610657	0.72215	0.827064	0.950425	1.05237	1.22663	1.25961	1.4373	1.61695	1.89734	2.34007	2.67245	3.6395	6.90979	32.5405
0.0450915	0.114062	0.17482	0.237815	0.256364	0.325952	0.394894	0.477517	0.530038	0.613431	0.722308	0.827731	0.950459	1.05237	1.228	1.25994	1.43794	1.61974	1.91421	2.34007	2.67737	3.64946	6.90979	32.5471
0.0451094	0.114148	0.174872	0.237966	0.256443	0.326133	0.395146	0.477659	0.531014	0.613712	0.722376	0.828338	0.952335	1.05237	1.22844	1.26023	1.43949	1.62743	1.9151	2.34007	2.68304	3.67693	7.00266	32.5934
0.0451353	0.114203	0.174919	0.238076	0.256495	0.326818	0.395366	0.478165	0.531207	0.613792	0.723579	0.828359	0.952447	1.05237	1.22849	1.26209	1.4404	1.63798	1.91669	2.34007	2.68304	3.68264	7.06211	33.1029
0.0451733	0.114453	0.174944	0.238078	0.257426	0.326942	0.395393	0.47858	0.531928	0.614125	0.724026	0.830552	0.952473	1.05237	1.22878	1.26355	1.44174	1.64042	1.92401	2.34099	2.68304	3.68586	7.14185	34.0403
0.0454813	0.114659	0.175283	0.239276	0.257482	0.32729	0.395804	0.479428	0.532109	0.614711	0.724192	0.830661	0.954985	1.05237	1.22926	1.26381	1.4424	1.64168	1.93106	2.35318	2.69522	3.68748	7.14185	34.7407
0.0455105	0.114699	0.175643	0.23932	0.257646	0.327397	0.396126	0.48072	0.532374	0.615627	0.725145	0.831898	0.955697	1.0524	1.23275	1.26405	1.44428	1.64179	1.93162	2.35318	2.69917	3.68748	7.32894	35.0651
0.0455249	0.114733	0.175862	0.239463	0.257706	0.327795	0.397003	0.480875	0.533432	0.616266	0.727266	0.831919	0.955982	1.05253	1.23282	1.26439	1.44431	1.64182	1.93508	2.35641	2.70281	3.68748	7.34571	35.4716
0.0456543	0.114754	0.176055	0.239616	0.258162	0.32796	0.397296	0.481074	0.533564	0.616492	0.727414	0.83291	0.958449	1.05391	1.23304	1.2648	1.44516	1.64537	1.93606	2.35862	2.7036	3.69308	7.37496	35.6334
0.0457095	0.114853	0.17606	0.24026	0.258952	0.328194	0.397519	0.481089	0.533773	0.616522	0.729633	0.833389	0.958766	1.0562	1.23498	1.2648	1.44559	1.64849	1.93731	2.36175	2.70447	3.70189	7.37496	36.4764
0.0457376	0.114909	0.176185	0.240473	0.259197	0.328255	0.397604	0.481537	0.534386	0.617058	0.730844	0.833494	0.958872	1.05735	1.23762	1.2648	1.4463	1.64954	1.93731	2.36251	2.70696	3.70608	7.41221	36.6447
0.0457714	0.114913	0.176437	0.240535	0.259431	0.328464	0.397872	0.482626	0.534912	0.617128	0.7309	0.833981	0.959076	1.0578	1.23801	1.2648	1.44635	1.65339	1.93731	2.36414	2.71174	3.70644	7.53181	37.4953
0.0458189	0.115094	0.176459	0.24059	0.25951	0.328564	0.398199	0.482691	0.535174	0.617837	0.732683	0.834088	0.962547	1.05909	1.23813	1.2648	1.44635	1.65345	1.93731	2.36529	2.73977	3.70772	7.56035	37.6509
0.0458238	0.115095	0.176527	0.240915	0.259683	0.328672	0.398564	0.483045	0.535213	0.618289	0.733522	0.835298	0.964531	1.05998	1.23878	1.2648	1.44635	1.65574	1.93731	2.36999	2.73977	3.71076	7.59468	37.9455
0.0458585	0.115313	0.176594	0.24094	0.259832	0.32897	0.398586	0.483174	0.535291	0.618767	0.735321	0.835505	0.966371	1.06588	1.24023	1.2648	1.44635	1.65679	1.93731	2.37003	2.75111	3.71154	7.60902	38.2797
0.0458707	0.115424	0.17662	0.241023	0.259972	0.328986	0.399146	0.483582	0.535596	0.61879	0.737418	0.835709	0.967588	1.06604	1.24023	1.2648	1.44635	1.65712	1.93731	2.37466	2.75474	3.71334	7.65738	38.2933
0.0458707	0.11564	0.1768	0.241306	0.260079	0.329057	0.399595	0.483606	0.535635	0.620954	0.738755	0.836172	0.968442	1.06797	1.24023	1.2648	1.44635	1.65909	1.93731	2.37502	2.7631	3.71831	7.69345	38.5296
0.0459289	0.115703	0.176892	0.241335	0.260302	0.330446	0.399781	0.484042	0.536692	0.622166	0.739267	0.836189	0.968577	1.0681	1.24023	1.2648	1.44635	1.66027	1.93731	2.38483	2.77325	3.7207	7.74923	38.587
0.0462235	0.115855	0.176994	0.241879	0.260815	0.331116	0.400301	0.484256	0.536837	0.622764	0.740023	0.836306	0.970303	1.07186	1.24023	1.2648	1.44635	1.66201	1.93731	2.38615	2.77325	3.72302	7.88305	38.7462
0.0462689	0.115983	0.177028	0.24192	0.261375	0.331415	0.400482	0.484597	0.537648	0.624087	0.74112	0.837497	0.971081	1.07194	1.24023	1.2648	1.44635	1.663	1.93781	2.38734	2.77325	3.73087	7.89244	38.8413
0.0464366	0.116069	0.177034	0.242089	0.261445	0.331429	0.400514	0.484731	0.538051	0.624376	0.74165	0.838439	0.972529	1.07296	1.24023	1.26827	1.44635	1.66395	1.94976	2.38792	2.77325	3.74752	7.94137	39.6456
0.0464545	0.11626	0.177107	0.242509	0.262042	0.331614	0.400542	0.485291	0.538227	0.624755	0.741659	0.838871	0.974115	1.07497	1.24023	1.26835	1.44635	1.66395	1.95147	2.404	2.77325	3.75181	7.94137	39.9379
0.0465352	0.116289	0.177407	0.242539	0.262609	0.331952	0.400933	0.485734	0.538765	0.624973	0.74204	0.839377	0.974244	1.07637	1.24023	1.26886	1.44635	1.66502	1.96037	2.40644	2.77325	3.75363	7.94137	39.9964
0.0466462	0.116534	0.177714	0.242627	0.263704	0.332098	0.401295	0.48594	0.53925	0.625092	0.742349	0.839454	0.974592	1.07909	1.24023	1.27108	1.44635	1.66825	1.96897	2.40819	2.77325	3.75963	7.94137	40.0279
0.0467099	0.11655	0.177726	0.242688	0.263762	0.332119	0.401365	0.486012	0.541785	0.625744	0.743272	0.840448	0.974953	1.0793	1.24023	1.27145	1.44635	1.67109	1.97165	2.40914	2.77325	3.76319	7.94137	40.56
0.0468172	0.116651	0.177822	0.24287	0.263954	0.332358	0.401666	0.486349	0.542148	0.627058	0.744141	0.840595	0.976334	1.08007	1.24023	1.27189	1.44635	1.67531	1.97393	2.41189	2.77325	3.76661	8.01464	40.5896
0.0468219	0.116704	0.178016	0.242944	0.264022	0.332412	0.402832	0.486514	0.54528	0.627416	0.744141	0.841187	0.976982	1.08009	1.24023	1.27307	1.44635	1.67546	1.97573	2.41193	2.77325	3.77118	8.07963	41.1377
0.0470142	0.116767	0.178631	0.24308	0.264289	0.332501	0.402877	0.486733	0.545289	0.628433	0.744141	0.842958	0.976999	1.08072	1.24023	1.27321	1.44635	1.67788	1.97644	2.41222	2.77325	3.776	8.11003	41.4305
0.047148	0.116801	0.17873	0.243085	0.265204	0.332557	0.404325	0.486834	0.545592	0.628805	0.744141	0.84324	0.9775	1.08126	1.24023	1.27411	1.44635	1.68329	1.97724	2.42112	2.77325	3.77794	8.15302	41.4713
0.0471656	0.116856	0.178822	0.243222	0.265249	0.333732	0.404351	0.48694	0.545685	0.629067	0.744141	0.843732	0.977871	1.08192	1.24023	1.27418	1.44635	1.68875	1.97886	2.4217	2.77325	3.77796	8.24546	41.5336
0.0472738	0.116888	0.17883	0.243364	0.265534	0.33376	0.404477	0.487046	0.546203	0.632535	0.744141	0.846569	0.978162	1.08358	1.24023	1.27448	1.44635	1.69035	1.98429	2.42627	2.77325	3.78557	8.2638	41.9317
0.0473518	0.116891	0.179195	0.243371	0.265779	0.334122	0.40461	0.487389	0.546218	0.632585	0.744141	0.846688	0.981831	1.08387	1.24023	1.27821	1.44635	1.69138	1.98438	2.42883	2.77325	3.78627	8.31605	42.4225
0.0474154	0.116905	0.179214	0.243397	0.265986	0.33467	0.405012	0.487489	0.546385	0.633518	0.744141	0.847616	0.981919	1.08449	1.24023	1.27826	1.44635	1.69295	1.98438	2.43193	2.77325	3.78959	8.55312	42.5167
0.0474628	0.116935	0.179313	0.243454	0.266125	0.334703	0.405051	0.488467	0.546514	0.63386	0.744141	0.847811	0.982675	1.08452	1.24023	1.27914	1.44635	1.69446	1.98438	2.43206	2.78208	3.79439	8.64637	42.5428
0.0474704	0.116985	0.179555	0.243565	0.266469	0.334742	0.406162	0.488901	0.546855	0.634484	0.744141	0.848218	0.983388	1.08502	1.24023	1.28369	1.44635	1.69492	1.98438	2.43517	2.78649	3.79933	8.70375	42.6583
0.0475987	0.116994	0.179984	0.243727	0.266706	0.334967	0.406204	0.489116	0.546949	0.635203	0.744141	0.84865	0.985295	1.08504	1.24023	1.2843	1.44635	1.69631	1.98438	2.43725	2.79796	3.8003	8.71457	43.1473
0.0477427	0.117023	0.180064	0.243784	0.266884	0.3354	0.406306	0.489339	0.547706	0.635296	0.744141	0.850589	0.985491	1.08508	1.24023	1.28715	1.44635	1.69828	1.98438	2.44298	2.80237	3.81006	8.73815	43.1602
0.0479304	0.117062	0.180513	0.243822	0.267011	0.33543	0.407005	0.489767	0.547997	0.635645	0.744141	0.851466	0.987954	1.0885	1.24023	1.28764	1.44765	1.69977	1.98438	2.44298	2.80434	3.8104	8.75573	43.3657
0.0481658	0.117143	0.18068	0.244213	0.267423	0.335527	0.407306	0.490096	0.548441	0.636315	0.744141	0.852037	0.988271	1.08888	1.24023	1.28861	1.449	1.70092	1.98438	2.44298	2.80633	3.81396	8.7696	43.3657
0.0482402	0.11719	0.180694	0.244447	0.267672	0.335809	0.407453	0.490225	0.549329	0.636364	0.744141	0.85235	0.989319	1.09155	1.24023	1.28905	1.44938	1.70134	1.98438	2.44791	2.8249	3.82581	8.8036	43.4082
0.0482744	0.117264	0.180697	0.244642	0.26791	0.335867	0.408393	0.490486	0.550108	0.636515	0.744141	0.853699	0.990393	1.09356	1.24023	1.2911	1.45229	1.70344	1.98438	2.44894	2.82817	3.83053	8.82949	43.6464
0.0483055	0.117381	0.180719	0.244719	0.268142	0.336008	0.408506	0.49114	0.550229	0.636908	0.744141	0.854914	0.992179	1.09372	1.24023	1.29189	1.4548	1.70937	1.98438	2.45069	2.83118	3.83809	8.88688	43.9155
0.0483432	0.117793	0.180745	0.244776	0.268311	0.336632	0.408701	0.491574	0.551475	0.637726	0.744141	0.855059	0.992188	1.09495	1.24023	1.29193	1.45522	1.71266	1.98438	2.45189	2.8348	3.83826	8.89793	43.933
0.0483502	0.117829	0.180969	0.244818	0.268511	0.33684	0.409263	0.491783	0.552612	0.638625	0.744141	0.855154	0.992188	1.09572	1.24023	1.29413	1.4555	1.71591	1.98438	2.45475	2.85601	3.85158	8.93313	44.1746
0.0483642	0.117961	0.181323	0.244982	0.268617	0.337063	0.409295	0.491866	0.552801	0.638811	0.744141	0.856	0.992188	1.09717	1.24023	1.30099	1.45601	1.71617	1.98438	2.45554	2.86722	3.85898	8.94346	44.2616
0.0484049	0.117985	0.181367	0.245721	0.26888	0.337268	0.409575	0.491948	0.552891	0.639697	0.744141	0.856036	0.992188	1.09801	1.24023	1.30212	1.45614	1.71795	1.98579	2.458	2.86918	3.86057	9.02904	44.4253
0.048441	0.118035	0.181465	0.245873	0.268929	0.337277	0.409582	0.492313	0.553848	0.639759	0.744141	0.858287	0.992188	1.09811	1.24023	1.30589	1.45786	1.71796	1.99215	2.45835	2.87604	3.87462	9.17773	44.4274
0.0484806	0.118043	0.181542	0.24601	0.268959	0.337464	0.409645	0.492461	0.553966	0.640693	0.744141	0.858289	0.992188	1.10024	1.24023	1.30766	1.45792	1.719	1.99616	2.46749	2.88567	3.87462	9.18109	44.93
0.0485236	0.118127	0.181696	0.246169	0.269239	0.337665	0.41008	0.492564	0.55465	0.64152	0.744141	0.858398	0.992188	1.10131	1.24023	1.31034	1.45822	1.72058	1.99799	2.47184	2.89253	3.87462	9.49731	44.93
0.0486509	0.118213	0.181774	0.246193	0.269253	0.33796	0.410182	0.492925	0.55465	0.642046	0.744141	0.858696	0.992188	1.10151	1.24023	1.31203	1.46447	1.72093	1.99917	2.48047	2.8927	3.87462	9.7467	45.1486
0.0487216	0.118381	0.181836	0.246272	0.269255	0.338247	0.410285	0.493868	0.55465	0.642322	0.744141	0.85913	0.992188	1.10182	1.24023	1.31307	1.46634	1.72363	1.99982	2.48047	2.8927	3.88723	9.99909	45.2412
0.0488753	0.118496	0.181893	0.246317	0.269362	0.338291	0.410451	0.493876	0.55465	0.643537	0.744141	0.859835	0.992188	1.10344	1.24023	1.31477	1.47737	1.72394	1.99982	2.48047	2.91112	3.88966	10.2272	45.2956
0.0489484	0.118797	0.181898	0.246834	0.269518	0.338332	0.410832	0.494175	0.55465	0.644526	0.744141	0.860572	0.992188	1.10582	1.24023	1.31512	1.47778	1.72793	1.99982	2.48047	2.97594	3.89108	10.2272	45.4359
0.0489836	0.119064	0.182146	0.247217	0.2697	0.339497	0.410903	0.494861	0.55465	0.644775	0.744141	0.861537	0.992188	1.10759	1.24023	1.31654	1.48047	1.73094	1.99982	2.48047	2.98153	3.89682	11.0151	45.4359
0.049104	0.119118	0.182219	0.247248	0.270015	0.339753	0.411007	0.494996	0.55465	0.645873	0.744141	0.861568	0.992188	1.1093	1.24023	1.31802	1.48298	1.73313	1.99982	2.48047	2.98214	3.89975	11.7659	45.6089
0.0491134	0.119394	0.182253	0.247444	0.270419	0.339856	0.411031	0.495422	0.55465	0.647072	0.744141	0.86166	0.992188	1.1093	1.24023	1.31966	1.48511	1.73633	1.99982	2.48047	2.98232	3.90115	11.9707	46.2173
0.0493397	0.11947	0.182313	0.247861	0.270525	0.340014	0.411294	0.495858	0.55465	0.648481	0.744141	0.861879	0.992188	1.1093	1.24023	1.3214	1.48828	1.73633	1.99982	2.48047	2.98688	3.90733	12.0015	46.6862
0.0496094	0.119559	0.182796	0.247916	0.270756	0.340336	0.412216	0.495996	0.55465	0.648642	0.744141	0.861994	0.992188	1.1093	1.24023	1.32152	1.48828	1.73633	1.99982	2.48047	2.99716	3.91529	12.2375	46.7238
0.0496679	0.119842	0.182925	0.248047	0.270768	0.340625	0.412254	0.496094	0.55465	0.648658	0.744141	0.863021	0.992188	1.1093	1.24023	1.32219	1.48828	1.73633	1.99982	2.48047	2.99716	3.92197	12.5503	46.7501
0.0497938	0.119847	0.182935	0.248047	0.270895	0.340664	0.41277	0.496094	0.55465	0.649028	0.744141	0.864527	0.992188	1.1093	1.24023	1.32268	1.48828	1.73633	1.99982	2.48047	2.99716	3.92365	12.769	47.1348
0.0497989	0.119962	0.183128	0.248047	0.271116	0.341317	0.412891	0.496094	0.55465	0.649712	0.744141	0.865612	0.992188	1.1093	1.24023	1.32277	1.48828	1.73633	1.99982	2.48047	3.0076	3.92958	12.9484	47.213
0.0499015	0.12002	0.18331	0.248047	0.271328	0.341992	0.413109	0.496094	0.55465	0.650121	0.744141	0.865949	0.992188	1.1093	1.24023	1.32355	1.48828	1.73633	2.0022	2.48047	3.01066	3.94409	13.0996	47.2228
0.0499174	0.120045	0.183594	0.248047	0.271415	0.342394	0.413224	0.496094	0.55465	0.651535	0.744141	0.866712	0.992188	1.1093	1.24023	1.3244	1.48828	1.73633	2.00421	2.48047	3.01762	3.94524	13.1465	48.0654
0.0499821	0.120157	0.183622	0.248047	0.271568	0.342505	0.413257	0.496094	0.55465	0.651611	0.744141	0.866713	0.992188	1.1093	1.24023	1.32631	1.48828	1.73633	2.00793	2.48047	3.01915	3.94819	13.2676	48.6937
0.0500456	0.120234	0.183682	0.248047	0.271688	0.342686	0.413305	0.496094	0.55465	0.652054	0.744141	0.867073	0.992188	1.1093	1.24023	1.32644	1.48828	1.73633	2.00815	2.48047	3.01996	3.96783	13.3577	49.0205
0.0501036	0.120322	0.183689	0.248047	0.271727	0.342949	0.413678	0.496094	0.55465	0.652604	0.744141	0.868496	0.992188	1.1093	1.24023	1.32648	1.48828	1.73633	2.00953	2.48047	3.0278	3.9741	13.4952	49.808
0.0501036	0.120507	0.183711	0.248047	0.272115	0.343576	0.41502	0.496094	0.55465	0.653096	0.744141	0.868625	0.992188	1.1093	1.24023	1.32753	1.48828	1.73633	2.01342	2.48047	3.0278	4.0169	13.4998	50.0397
0.0501451	0.120573	0.183802	0.248047	0.272323	0.343721	0.415345	0.496094	0.55465	0.653445	0.744141	0.868635	0.992188	1.1093	1.24023	1.32899	1.48828	1.73766	2.01435	2.48047	3.0278	4.01941	13.4998	50.1938
0.050205	0.120604	0.183983	0.248047	0.272363	0.344169	0.41546	0.496094	0.55465	0.653566	0.744141	0.868693	0.992188	1.1093	1.24023	1.3318	1.4893	1.73783	2.02808	2.48047	3.0278	4.03791	13.6493	50.4146
0.0502234	0.120734	0.184115	0.248047	0.272395	0.344384	0.416317	0.496094	0.55465	0.653992	0.744141	0.870044	0.992188	1.1093	1.24023	1.33181	1.49287	1.7412	2.03475	2.48047	3.0278	4.04686	13.6629	50.6125
0.0502612	0.120995	0.184226	0.248047	0.272933	0.34469	0.416444	0.496094	0.55465	0.65408	0.744141	0.871208	0.992188	1.1093	1.24023	1.33439	1.49352	1.74449	2.0407	2.48047	3.0278	4.06137	13.6988	50.9421
0.0502766	0.121072	0.184291	0.248047	0.273216	0.344763	0.416571	0.496094	0.55465	0.655393	0.744141	0.871284	0.992188	1.1096	1.24023	1.33521	1.49436	1.75396	2.04545	2.48047	3.0278	4.06827	13.7325	51.1458
0.0503005	0.121074	0.184381	0.248047	0.27344	0.344975	0.417554	0.496094	0.55465	0.655629	0.745662	0.87135	0.992188	1.11017	1.24023	1.33577	1.498	1.75396	2.04545	2.48047	3.03485	4.06827	13.7772	51.3954
0.0503019	0.121092	0.184618	0.248047	0.274157	0.345111	0.417889	0.496094	0.55465	0.65654	0.747424	0.87163	0.992188	1.11179	1.24023	1.33577	1.50056	1.75396	2.04545	2.48047	3.04066	4.06827	13.8062	51.6712
0.0503243	0.121107	0.184766	0.248047	0.274698	0.345378	0.418042	0.496094	0.55465	0.65678	0.749563	0.871717	0.992188	1.1124	1.24023	1.33577	1.50316	1.75396	2.04615	2.48047	3.06817	4.06827	13.8196	51.8442
0.0503335	0.121124	0.185669	0.248047	0.274821	0.345385	0.418133	0.496094	0.55465	0.657595	0.749589	0.871798	0.992188	1.11368	1.24023	1.33577	1.5041	1.75396	2.05087	2.48047	3.06817	4.095	13.9657	52.3966
0.0503654	0.121145	0.185672	0.248047	0.274837	0.345957	0.419295	0.496094	0.55465	0.658804	0.752055	0.87232	0.992188	1.11681	1.24023	1.33577	1.50454	1.75396	2.05903	2.48047	3.08735	4.10591	13.9657	52.4665
0.0503981	0.121362	0.185725	0.248047	0.274894	0.346985	0.419401	0.496094	0.55465	0.659648	0.752995	0.87252	0.992188	1.1169	1.24023	1.33577	1.50471	1.75396	2.0604	2.48047	3.09653	4.12687	14.0514	52.484
0.0505433	0.121439	0.18579	0.248047	0.275073	0.347136	0.419854	0.496094	0.554842	0.66017	0.753012	0.873266	0.992188	1.1173	1.24023	1.33577	1.50522	1.75396	2.06995	2.48047	3.09671	4.12832	14.1191	52.9555
0.0505438	0.121637	0.185896	0.248047	0.27559	0.347443	0.419972	0.496094	0.555158	0.660536	0.753575	0.873346	0.992188	1.11817	1.24023	1.33577	1.50564	1.75396	2.08106	2.48047	3.10052	4.13656	14.2514	53.0264
0.0505962	0.121776	0.185911	0.248047	0.275782	0.347528	0.420583	0.496094	0.55548	0.661305	0.75418	0.87366	0.992188	1.11894	1.24023	1.33577	1.50686	1.75396	2.083	2.48072	3.10131	4.15802	14.2514	53.0438
0.0506406	0.121907	0.185912	0.248047	0.275926	0.347877	0.42079	0.496094	0.55585	0.662589	0.75528	0.877139	0.992188	1.12073	1.24023	1.33577	1.50881	1.75396	2.08806	2.48491	3.10455	4.2095	14.2837	53.6722
0.0507197	0.121927	0.18623	0.248047	0.276481	0.348599	0.421019	0.496094	0.555937	0.663977	0.756987	0.87725	0.992188	1.12178	1.24023	1.33577	1.50881	1.75396	2.09339	2.49231	3.10885	4.24746	14.2837	54.1924
0.0507286	0.122086	0.186311	0.248047	0.276628	0.348738	0.42109	0.496094	0.557091	0.664907	0.757946	0.880529	0.992188	1.12436	1.24023	1.33577	1.50881	1.75396	2.0956	2.49284	3.12804	4.27668	14.2837	54.2106
0.0507832	0.122184	0.186773	0.248047	0.276727	0.348778	0.421219	0.496094	0.558385	0.66533	0.758385	0.883957	0.992188	1.12739	1.24023	1.33577	1.50881	1.75396	2.10273	2.49284	3.14218	4.32139	14.4337	54.3789
0.0509122	0.122442	0.186857	0.248047	0.276858	0.348788	0.421371	0.496094	0.559547	0.665703	0.758441	0.884515	0.992188	1.12757	1.24023	1.33577	1.50881	1.75396	2.10568	2.49284	3.14588	4.3273	14.5927	54.4009
0.0509259	0.122467	0.186863	0.248047	0.277026	0.349078	0.421373	0.496094	0.560224	0.666222	0.758786	0.885927	0.992188	1.12765	1.24023	1.33577	1.50881	1.75396	2.10834	2.49284	3.1502	4.33102	14.6851	54.4134
0.0509597	0.122493	0.186991	0.248047	0.27709	0.349256	0.421863	0.496094	0.560939	0.666869	0.758873	0.886215	0.992188	1.1279	1.24023	1.33577	1.50881	1.75396	2.11053	2.49284	3.1542	4.33905	14.6851	55.1646
0.0510811	0.122565	0.187051	0.248047	0.277336	0.349538	0.421899	0.496094	0.561031	0.668395	0.75905	0.887419	0.992188	1.13011	1.24023	1.33577	1.50881	1.75396	2.11166	2.49284	3.15712	4.33905	14.6851	55.1814
0.0511362	0.12277	0.187075	0.248047	0.277496	0.350288	0.423302	0.496094	0.561432	0.668626	0.759295	0.88998	0.992188	1.13047	1.24023	1.33577	1.50881	1.75396	2.11189	2.495	3.16253	4.35086	14.9344	55.4633
0.0513081	0.122859	0.187235	0.248047	0.2781	0.350363	0.423421	0.496094	0.561915	0.671461	0.759493	0.890477	0.993187	1.13146	1.24023	1.33577	1.50881	1.75396	2.11321	2.49775	3.16989	4.35494	14.9344	55.7466
0.05135	0.122927	0.187619	0.248047	0.278156	0.350502	0.423537	0.496094	0.562476	0.672364	0.760134	0.891564	0.994354	1.133	1.24023	1.33577	1.5131	1.75396	2.1167	2.50027	3.17655	4.36666	15.033	55.9828
0.0515236	0.122942	0.18775	0.248047	0.278302	0.350619	0.423655	0.496094	0.562787	0.672385	0.760756	0.891868	0.996017	1.13336	1.24023	1.33577	1.51483	1.75396	2.11853	2.50204	3.17655	4.37115	15.2039	56.0092
0.0517105	0.123099	0.187771	0.248047	0.278519	0.350717	0.42547	0.496094	0.562839	0.673068	0.761731	0.894346	0.996601	1.13463	1.24023	1.33577	1.51492	1.75396	2.11931	2.50234	3.17655	4.37448	15.2302	56.103
0.0517178	0.123119	0.187783	0.248047	0.279804	0.350791	0.425609	0.496094	0.563652	0.673377	0.763209	0.894346	0.998016	1.13517	1.24023	1.33577	1.51687	1.75396	2.11931	2.50616	3.18822	4.38592	15.4288	56.1513
0.0517386	0.123255	0.187885	0.248047	0.27984	0.350791	0.425771	0.496094	0.565234	0.674595	0.764009	0.894346	0.998583	1.1365	1.24023	1.33577	1.51914	1.75396	2.11931	2.50627	3.19307	4.41106	15.4846	56.6292
0.0517509	0.123319	0.188153	0.248047	0.279889	0.350791	0.4265	0.496094	0.565495	0.674643	0.764464	0.894346	0.998749	1.13776	1.24023	1.33577	1.51919	1.75396	2.11942	2.50644	3.19649	4.47173	15.5698	57.3546
0.0517689	0.123412	0.188631	0.248047	0.280006	0.350791	0.427533	0.496094	0.566189	0.674661	0.764735	0.894346	0.999602	1.13811	1.24023	1.33577	1.52096	1.75396	2.12038	2.51229	3.19674	4.47173	15.5777	57.3675
0.0517833	0.1235	0.188897	0.248047	0.280028	0.350791	0.427781	0.496094	0.566661	0.675663	0.765586	0.894346	1.00042	1.139	1.24023	1.33577	1.52226	1.75396	2.12273	2.51825	3.2119	4.47173	15.7133	57.4195
0.051856	0.123695	0.188963	0.248047	0.280417	0.350791	0.428003	0.496094	0.566702	0.676458	0.766226	0.894346	1.00195	1.1391	1.24023	1.33577	1.52369	1.75396	2.12756	2.52391	3.21674	4.47173	15.8924	57.6003
0.0519238	0.12372	0.189143	0.248047	0.280589	0.350791	0.428192	0.496094	0.566833	0.676473	0.766489	0.894346	1.00437	1.14168	1.24023	1.33577	1.52429	1.75396	2.13052	2.52536	3.21702	4.47173	15.9253	58.5942
0.0519751	0.123761	0.189552	0.248047	0.280839	0.350791	0.428226	0.496094	0.567125	0.677401	0.766761	0.894346	1.0044	1.14225	1.24023	1.33577	1.52725	1.75396	2.13378	2.52813	3.21964	4.47173	15.9253	58.6026
0.0520108	0.123776	0.189667	0.248047	0.280882	0.350791	0.428701	0.496094	0.568186	0.67774	0.767648	0.894346	1.00551	1.14242	1.24023	1.33577	1.52753	1.75396	2.13378	2.52863	3.22461	4.47173	16.0389	59.1101
0.0520374	0.124233	0.189783	0.248047	0.281091	0.350791	0.429137	0.496094	0.568547	0.678672	0.770313	0.894346	1.00621	1.14256	1.24023	1.33635	1.52935	1.75396	2.13378	2.52959	3.22461	4.47666	16.125	59.8801
0.052051	0.124234	0.1899	0.248047	0.282066	0.350791	0.429273	0.496094	0.569285	0.678853	0.771319	0.894346	1.00829	1.14333	1.24023	1.33727	1.53105	1.75396	2.13378	2.52959	3.22461	4.57376	16.1707	60.4186
0.0520953	0.124443	0.19015	0.248047	0.282457	0.350791	0.429328	0.496094	0.569348	0.679117	0.771424	0.894346	1.00906	1.14392	1.24023	1.33887	1.53116	1.75396	2.13378	2.52959	3.22759	4.60405	16.2504	62.7637
0.0523457	0.124481	0.190216	0.248047	0.282949	0.350791	0.429978	0.496094	0.569566	0.67921	0.772365	0.894346	1.00932	1.14468	1.24023	1.34148	1.53326	1.75396	2.13378	2.52959	3.23414	4.61394	16.3636	63.252
0.0523909	0.124619	0.190219	0.248047	0.282969	0.350791	0.430447	0.496094	0.570078	0.679888	0.773163	0.894346	1.01167	1.1452	1.24023	1.34193	1.53507	1.75396	2.13378	2.53327	3.24479	4.64456	16.448	63.5019
0.0524717	0.124971	0.190352	0.248047	0.283389	0.350791	0.430652	0.496094	0.570896	0.680019	0.773506	0.894346	1.01283	1.14665	1.24023	1.34229	1.53892	1.75396	2.13378	2.53371	3.25536	4.64564	16.4629	64.5322
0.0525382	0.125036	0.190728	0.248047	0.284144	0.350791	0.431013	0.496094	0.571668	0.683384	0.773779	0.894346	1.01287	1.14758	1.24023	1.34322	1.54535	1.75396	2.13378	2.54008	3.26123	4.65205	16.4723	65.0961
0.0526106	0.125041	0.190885	0.248047	0.284679	0.350791	0.431161	0.496094	0.571858	0.683613	0.77426	0.894346	1.01292	1.15	1.24023	1.34593	1.54595	1.75396	2.13378	2.54213	3.26255	4.67718	16.4909	65.4863
0.0526637	0.125052	0.191035	0.248047	0.285113	0.350791	0.432152	0.496094	0.572273	0.683983	0.775973	0.894495	1.01314	1.15037	1.24023	1.34704	1.54663	1.75396	2.13378	2.54968	3.26299	4.67795	16.4909	65.6537
0.0526924	0.12514	0.191064	0.248047	0.285296	0.350791	0.432515	0.496094	0.57279	0.684412	0.777351	0.894591	1.01343	1.15056	1.24023	1.34747	1.55291	1.75396	2.13378	2.55024	3.26943	4.67933	16.5319	65.7174
0.052707	0.12518	0.191129	0.248047	0.285349	0.350791	0.433077	0.496094	0.572916	0.685043	0.777589	0.89639	1.01352	1.15268	1.24023	1.34755	1.55423	1.75396	2.13378	2.55293	3.27242	4.68014	16.5598	66.6582
0.0527275	0.125278	0.191161	0.248047	0.285721	0.350791	0.434039	0.496094	0.573699	0.685285	0.779526	0.898002	1.01534	1.15455	1.24023	1.35051	1.55454	1.75396	2.13378	2.5538	3.27924	4.71289	16.6487	66.6734
0.0527327	0.125343	0.191239	0.248047	0.285813	0.350791	0.434658	0.496094	0.57398	0.685372	0.780345	0.89852	1.01648	1.1551	1.24023	1.35064	1.55546	1.75396	2.13378	2.5538	3.28993	4.71953	16.6487	66.8646
0.0527384	0.125374	0.191345	0.248047	0.285869	0.350791	0.435055	0.496094	0.574031	0.685516	0.781	0.898833	1.01712	1.15595	1.24023	1.35136	1.56185	1.75396	2.13686	2.5538	3.3028	4.72066	16.6764	67.1126
0.0528958	0.125453	0.191423	0.248047	0.285889	0.350791	0.435205	0.496094	0.574978	0.685936	0.781047	0.899409	1.01722	1.1561	1.24023	1.35152	1.56724	1.75396	2.13696	2.5538	3.30693	4.73346	16.8526	67.3199
0.0529197	0.125614	0.191498	0.248047	0.286099	0.350791	0.437087	0.496094	0.575085	0.687045	0.781379	0.899978	1.01891	1.15648	1.24023	1.35232	1.56879	1.75396	2.14033	2.5538	3.30936	4.77128	16.8617	67.6695
0.0529789	0.125765	0.191518	0.248047	0.286251	0.350791	0.437507	0.496094	0.576463	0.687248	0.781568	0.900012	1.02114	1.15653	1.24023	1.35363	1.56879	1.75991	2.14233	2.5538	3.31113	4.79767	16.8745	67.7786
0.0532152	0.126033	0.191568	0.248047	0.286306	0.350791	0.438177	0.496094	0.576872	0.687252	0.781736	0.900036	1.02224	1.15789	1.24023	1.35659	1.56879	1.76367	2.14242	2.5538	3.32199	4.79833	17.1655	68.3481
0.0532374	0.126059	0.192419	0.248047	0.286394	0.350791	0.43863	0.496094	0.576967	0.687326	0.781935	0.900128	1.02227	1.15873	1.24023	1.35712	1.56879	1.76404	2.14341	2.5538	3.32203	4.83555	17.278	70.2095
0.0532978	0.126085	0.192461	0.248047	0.286627	0.350791	0.438988	0.496094	0.577062	0.688204	0.782554	0.900717	1.02272	1.15879	1.24023	1.35836	1.56879	1.76446	2.15344	2.55605	3.33075	4.86324	17.3651	70.4602
0.0533445	0.126127	0.192486	0.248047	0.286943	0.350791	0.439943	0.496094	0.577173	0.689386	0.78258	0.901719	1.02272	1.15897	1.24023	1.35891	1.56879	1.76563	2.16326	2.56235	3.33135	4.89225	17.5325	72.9026
0.0535076	0.126154	0.192513	0.248047	0.287033	0.350791	0.440115	0.496094	0.577516	0.689551	0.78274	0.903805	1.02272	1.16079	1.24023	1.35902	1.57427	1.76766	2.16366	2.56243	3.33713	4.89225	17.5623	73.9903
0.053546	0.126183	0.192593	0.248047	0.287649	0.350791	0.440373	0.496094	0.578203	0.690329	0.784393	0.904838	1.02272	1.16154	1.24023	1.3592	1.57456	1.77165	2.16692	2.56832	3.33713	4.91576	17.6654	74.9106
0.0536335	0.126219	0.192652	0.248047	0.287779	0.350791	0.440424	0.496094	0.579192	0.693134	0.784393	0.905261	1.02272	1.1629	1.24023	1.35947	1.57526	1.77203	2.16753	2.57093	3.33713	4.99185	17.7575	75.6547
0.0536751	0.126232	0.192861	0.248047	0.287902	0.350791	0.440734	0.496094	0.579552	0.69378	0.784393	0.905356	1.02272	1.16334	1.24023	1.35951	1.58118	1.77512	2.18537	2.57835	3.33713	5.02793	17.9761
0.0537004	0.126376	0.193071	0.248047	0.288148	0.350791	0.441217	0.496094	0.581757	0.694123	0.784393	0.906231	1.02272	1.16427	1.24023	1.36013	1.58818	1.77913	2.18728	2.5831	3.33713	5.08557	18.0581
0.0537123	0.126411	0.193143	0.248047	0.288297	0.350791	0.441291	0.496094	0.581999	0.694917	0.784393	0.906328	1.02272	1.16433	1.24023	1.361	1.58823	1.78153	2.19187	2.58969	3.33713	5.1076	18.0938
0.0537285	0.126542	0.193176	0.248047	0.28854	0.350791	0.441767	0.496094	0.582614	0.696097	0.784393	0.907118	1.02272	1.16508	1.24023	1.36332	1.58827	1.78607	2.20036	2.58969	3.34481	5.1076	18.1091
0.0537607	0.12689	0.193305	0.248047	0.288607	0.350791	0.442312	0.496094	0.582867	0.697135	0.784393	0.907575	1.02272	1.16628	1.24023	1.36515	1.58827	1.78869	2.20662	2.58969	3.34812	5.11339	18.1227
0.0538417	0.126897	0.193367	0.248047	0.288704	0.351241	0.442457	0.496094	0.58324	0.697642	0.784393	0.907727	1.02272	1.16985	1.24023	1.36746	1.58827	1.78869	2.20941	2.58969	3.36264	5.11362	18.1482
0.0539358	0.127066	0.193416	0.248047	0.288749	0.351413	0.442943	0.496094	0.583929	0.697924	0.784393	0.90785	1.02272	1.17212	1.24023	1.36773	1.58827	1.78869	2.2186	2.58969	3.36667	5.12658	18.1685
0.0539526	0.127218	0.193477	0.248047	0.288853	0.351505	0.443063	0.496094	0.584001	0.698564	0.784393	0.908455	1.02272	1.1723	1.24023	1.36777	1.58827	1.78869	2.2186	2.58969	3.3738	5.14113	18.231
0.0541096	0.127259	0.193556	0.248047	0.289151	0.352243	0.443101	0.496094	0.584833	0.698705	0.784393	0.908647	1.02272	1.1732	1.24023	1.36912	1.58827	1.78869	2.22078	2.58969	3.38057	5.14644	18.5107
0.0542458	0.127421	0.193619	0.248047	0.289208	0.352401	0.44317	0.496094	0.585409	0.699137	0.784393	0.910257	1.02272	1.17336	1.24023	1.36957	1.58827	1.78869	2.22153	2.58969	3.38449	5.16152	18.5107
0.0544038	0.127459	0.193625	0.248047	0.289259	0.352522	0.443487	0.496094	0.586145	0.69981	0.784393	0.911793	1.02272	1.17499	1.24023	1.3721	1.58827	1.79117	2.22202	2.59161	3.39122	5.195	18.5952
0.0545551	0.127484	0.194066	0.248047	0.289757	0.353355	0.443886	0.496094	0.586375	0.700314	0.784393	0.914121	1.02272	1.17628	1.24023	1.37554	1.58827	1.79164	2.23242	2.59321	3.39284	5.21489	18.63
0.0546272	0.127528	0.194518	0.248047	0.29014	0.353487	0.444115	0.496094	0.586442	0.700562	0.784393	0.91547	1.02272	1.1774	1.24023	1.37566	1.58827	1.79428	2.23242	2.5969	3.40977	5.26187	18.6448
0.0546893	0.127574	0.194562	0.248047	0.290219	0.353822	0.444124	0.496094	0.587361	0.700609	0.784393	0.915646	1.02432	1.18105	1.24023	1.3758	1.58827	1.79606	2.23242	2.60312	3.41572	5.32579	18.7813
0.0547911	0.12783	0.194675	0.248047	0.290232	0.354354	0.444216	0.496094	0.587675	0.701583	0.784393	0.915975	1.02489	1.18122	1.24023	1.37736	1.58827	1.80126	2.23242	2.60487	3.42035	5.32579	19.0625
0.0548017	0.127847	0.194702	0.248047	0.290387	0.354387	0.445388	0.496094	0.588541	0.701583	0.784393	0.916925	1.02546	1.18208	1.24023	1.38043	1.58827	1.80153	2.23242	2.61041	3.43766	5.36607	19.0625
0.0548318	0.127877	0.19478	0.248047	0.290613	0.354518	0.445503	0.496151	0.588983	0.701583	0.784393	0.916987	1.02606	1.18259	1.24023	1.38096	1.58827	1.80581	2.23242	2.61266	3.4399	5.44009	19.4492
0.0551161	0.12797	0.195009	0.248047	0.290878	0.35466	0.446299	0.496858	0.590455	0.701583	0.784393	0.917282	1.02718	1.18391	1.24023	1.38221	1.58827	1.80581	2.23242	2.61568	3.44598	5.44009	19.476
0.0551637	0.127997	0.195015	0.248047	0.290941	0.355272	0.446675	0.49774	0.59053	0.701583	0.784445	0.917983	1.02944	1.18513	1.24023	1.38267	1.58827	1.80581	2.23242	2.61701	3.45489	5.44009	20.299
0.0551725	0.128306	0.195017	0.248047	0.291004	0.355501	0.44816	0.497893	0.590598	0.701583	0.784943	0.918663	1.02955	1.18562	1.24023	1.38326	1.58827	1.80581	2.23242	2.61977	3.45489	5.44574	20.358
0.0552573	0.128355	0.195064	0.248047	0.29115	0.355787	0.449038	0.498109	0.591729	0.701583	0.785124	0.92096	1.03033	1.18627	1.24023	1.38362	1.58827	1.80581	2.23248	2.62587	3.45571	5.46267	20.7901
0.0552961	0.128512	0.195282	0.248047	0.291572	0.355806	0.449366	0.498918	0.591903	0.701583	0.785406	0.921393	1.03299	1.18744	1.24023	1.38422	1.58827	1.80597	2.24006	2.63677	3.46755	5.51876	20.9082
0.0553053	0.128533	0.195314	0.248047	0.291799	0.355952	0.450242	0.499376	0.592224	0.701583	0.786054	0.92163	1.03396	1.18929	1.24023	1.387	1.58827	1.80722	2.24616	2.63677	3.47444	5.5465	21.1073
0.0554386	0.128592	0.195437	0.248047	0.291949	0.356019	0.450465	0.499394	0.592474	0.701583	0.786569	0.923346	1.03491	1.19012	1.24023	1.38877	1.58827	1.81076	2.24616	2.63788	3.47804	5.59134	21.1525
0.0555143	0.128632	0.195619	0.248047	0.292042	0.356098	0.45065	0.499727	0.592599	0.702737	0.788106	0.923633	1.03644	1.19022	1.24023	1.39071	1.58827	1.82339	2.24616	2.63926	3.48001	5.62361	21.241
0.0555982	0.12875	0.195754	0.248047	0.292637	0.356171	0.450663	0.499797	0.592649	0.703099	0.788663	0.924809	1.03746	1.19043	1.24023	1.39209	1.58827	1.84098	2.24616	2.65474	3.4815	5.66721	21.2815
0.0556241	0.128847	0.195826	0.248047	0.292744	0.357111	0.451068	0.500561	0.592652	0.703318	0.791183	0.924972	1.03938	1.19064	1.24023	1.39438	1.58827	1.84801	2.24974	2.66205	3.49288	5.71047	21.4011
0.0556324	0.128867	0.195964	0.248047	0.292772	0.357184	0.45251	0.501832	0.593108	0.703326	0.791386	0.925295	1.04076	1.1911	1.24023	1.39446	1.59098	1.86644	2.24989	2.66539	3.50167	5.72661	21.4241
0.0557947	0.129166	0.196066	0.248047	0.292827	0.357847	0.452689	0.501908	0.593109	0.703371	0.792166	0.925556	1.04152	1.1921	1.24023	1.39467	1.59323	1.86702	2.25316	2.66855	3.50711	5.79071	21.5744
0.0558107	0.129182	0.196132	0.248047	0.292956	0.358234	0.452819	0.502151	0.593453	0.704855	0.792356	0.925684	1.0446	1.1954	1.24023	1.39492	1.59674	1.86768	2.25668	2.67155	3.50754	5.81192	21.5801
0.0558404	0.129235	0.196193	0.248047	0.292961	0.358283	0.452827	0.503029	0.593859	0.705489	0.79309	0.926175	1.0473	1.19643	1.2426	1.39637	1.60939	1.87057	2.26063	2.67155	3.50791	5.84243	21.5915
0.0559252	0.129307	0.196303	0.248047	0.293181	0.358585	0.453264	0.503072	0.593924	0.705519	0.794776	0.926538	1.04755	1.1976	1.24277	1.39817	1.61171	1.8719	2.26214	2.67155	3.50791	5.89601	21.6583
0.0559665	0.129498	0.196574	0.248047	0.29406	0.359347	0.453627	0.504865	0.594304	0.70586	0.795252	0.927003	1.04816	1.19962	1.24279	1.39899	1.61261	1.87208	2.27	2.67155	3.50791	5.89601	21.942
0.0560084	0.129532	0.196833	0.248047	0.294672	0.35937	0.453831	0.50506	0.594744	0.706459	0.795331	0.928901	1.04979	1.20059	1.24284	1.39953	1.61412	1.87635	2.27315	2.67155	3.50791	5.99432	22.1249
0.056096	0.129535	0.197028	0.248047	0.294705	0.359491	0.454263	0.505448	0.595138	0.706753	0.797627	0.929635	1.05089	1.20161	1.24302	1.39988	1.61949	1.87755	2.27434	2.67155	3.50791	6.04034	22.4753
0.0561184	0.129696	0.197123	0.248047	0.294957	0.359575	0.45478	0.505776	0.595283	0.707164	0.798361	0.92985	1.05205	1.20166	1.24332	1.40317	1.62501	1.88012	2.27755	2.67155	3.50791	6.20117	22.6172
0.0561328	0.129702	0.197149	0.248047	0.295409	0.359701	0.455588	0.506155	0.595674	0.709399	0.79913	0.929991	1.05218	1.2018	1.24641	1.40317	1.62608	1.88883	2.28688	2.67155	3.50791	6.22098	22.643
0.05614	0.129784	0.197186	0.248047	0.295607	0.36029	0.456414	0.506462	0.595879	0.711065	0.799825	0.930325	1.05232	1.20358	1.24727	1.40317	1.62678	1.88907	2.28688	2.67155	3.50791	6.22098	22.6702
0.0561915	0.129935	0.197235	0.248047	0.295688	0.360623	0.456565	0.506805	0.596286	0.711102	0.799848	0.930545	1.05237	1.20448	1.24827	1.40317	1.62731	1.88907	2.28688	2.67155	3.50791	6.32398	22.7366
0.0562233	0.129945	0.197323	0.248047	0.295884	0.360669	0.456684	0.506893	0.596346	0.711233	0.80065	0.930654	1.05237	1.20527	1.25077	1.40317	1.6303	1.88907	2.28747	2.67155	3.50791	6.44922	22.9064
0.0562275	0.129962	0.197373	0.248047	0.295916	0.360705	0.456901	0.506928	0.59787	0.711665	0.802803	0.93088	1.05237	1.20541	1.25138	1.40317	1.63108	1.88907	2.29099	2.67155	3.51003	6.44922	23.584
0.0562592	0.129974	0.197418	0.248047	0.295981	0.360767	0.457052	0.507522	0.598136	0.713135	0.803003	0.930964	1.05237	1.20598	1.25385	1.40317	1.63317	1.88907	2.29788	2.67155	3.51152	6.46827	23.9619
0.0562641	0.130108	0.197638	0.248047	0.29674	0.360977	0.457084	0.507671	0.598742	0.713188	0.803512	0.931368	1.05237	1.20752	1.25554	1.40374	1.63469	1.88963	2.30279	2.68285	3.51555	6.49201	24.2135
0.0563031	0.13021	0.197794	0.248047	0.296798	0.361052	0.457741	0.507911	0.600324	0.713231	0.80374	0.932032	1.05237	1.20754	1.25563	1.40718	1.63491	1.89397	2.30433	2.68304	3.52947	6.51094	24.2858
0.0563597	0.130215	0.197845	0.248047	0.296902	0.361399	0.457873	0.508034	0.600781	0.71375	0.804381	0.933107	1.05257	1.20861	1.25836	1.40908	1.63951	1.89432	2.3061	2.68304	3.53387	6.51094	24.431
0.0564076	0.130225	0.19788	0.248047	0.297055	0.361734	0.458817	0.508368	0.601078	0.713767	0.804942	0.93394	1.05388	1.20929	1.25871	1.41017	1.64073	1.89808	2.31876	2.6832	3.53782	6.53397	24.5654
0.0564777	0.130257	0.197992	0.248047	0.297801	0.362311	0.459222	0.508515	0.601325	0.714162	0.805146	0.934729	1.05421	1.20973	1.2601	1.41321	1.64469	1.89839	2.3207	2.68403	3.54721	6.59077	24.6304
0.0564907	0.130395	0.198558	0.248047	0.298522	0.362356	0.459467	0.508754	0.601974	0.71539	0.805405	0.934812	1.05462	1.21026	1.26029	1.41543	1.64496	1.90347	2.32235	2.68513	3.54933	6.67887	24.9062
0.0565267	0.130508	0.198678	0.248047	0.298881	0.362467	0.459981	0.509025	0.602141	0.715704	0.806854	0.934953	1.05573	1.21043	1.26207	1.41716	1.64828	1.91165	2.33024	2.69331	3.55389	6.67887	25.0048
0.0566108	0.130644	0.198735	0.248047	0.29929	0.362944	0.460099	0.509026	0.602763	0.716523	0.80712	0.93622	1.05593	1.21092	1.26212	1.41733	1.65096	1.91627	2.3307	2.71734	3.55596	6.67887	25.0871
0.0566878	0.130677	0.199048	0.248047	0.299401	0.3632	0.460165	0.509774	0.603145	0.717844	0.807177	0.93624	1.0569	1.21139	1.26354	1.42303	1.65161	1.91668	2.34007	2.71922	3.55807	6.67887	25.4475
0.056746	0.130694	0.199352	0.248047	0.301006	0.363268	0.460322	0.510059	0.603315	0.718046	0.808794	0.936378	1.05714	1.21141	1.2639	1.42366	1.65341	1.92065	2.34007	2.72486	3.5643	6.67887	25.7981
0.0567537	0.130757	0.19965	0.248047	0.301263	0.363682	0.460458	0.510711	0.60359	0.718096	0.810195	0.936661	1.05757	1.2119	1.26417	1.42481	1.65413	1.92074	2.34007	2.73154	3.56673	6.67887	26.2145
0.0568033	0.130779	0.199674	0.248047	0.301963	0.363786	0.461221	0.511993	0.603666	0.718186	0.810296	0.93693	1.05768	1.21301	1.2648	1.42796	1.65858	1.92413	2.34007	2.73622	3.57847	6.67887	26.4853
0.0568494	0.130874	0.200334	0.248047	0.301964	0.364136	0.461305	0.512009	0.603762	0.718216	0.810304	0.939454	1.0582	1.21318	1.2648	1.42804	1.65916	1.93394	2.34007	2.73977	3.57937	6.70116	26.8533
0.0569299	0.130921	0.200394	0.248047	0.302007	0.365182	0.462141	0.512422	0.604015	0.718535	0.811426	0.94079	1.05953	1.21343	1.2648	1.42955	1.6617	1.93731	2.34007	2.74391	3.58186	6.86064	27.2005
0.0569796	0.131049	0.200407	0.248047	0.302171	0.365688	0.462723	0.512562	0.604132	0.719932	0.811935	0.941201	1.06085	1.21362	1.2648	1.43522	1.6629	1.93731	2.34007	2.75336	3.59328	6.86064	27.648
0.0570326	0.131054	0.200414	0.248047	0.302208	0.366162	0.462831	0.512601	0.604502	0.721027	0.812059	0.94211	1.06298	1.21399	1.2648	1.43693	1.6636	1.93731	2.34007	2.75811	3.59823	6.90979	27.7391
0.0570392	0.131072	0.200869	0.248047	0.302252	0.366766	0.462855	0.513208	0.604614	0.722203	0.812264	0.942823	1.0642	1.21734	1.2648	1.43711	1.66395	1.93731	2.34007	2.77325	3.60607	6.90979	28.1782
0.0570737	0.13109	0.200903	0.248047	0.302258	0.366807	0.464045	0.513336	0.605514	0.722667	0.813712	0.944602	1.06606	1.21828	1.2648	1.43777	1.66395	1.93731	2.34306	2.77325	3.60967	6.90979	28.5674
0.0571834	0.131093	0.201025	0.248047	0.302374	0.366916	0.464144	0.513436	0.605981	0.722905	0.815528	0.944998	1.06712	1.21925	1.2648	1.44259	1.66627	1.93731	2.34508	2.77325	3.62933	6.94974	28.7092
0.0572083	0.131176	0.201214	0.248047	0.302429	0.36692	0.464188	0.51492	0.606934	0.723168	0.815848	0.946785	1.06965	1.22185	1.2648	1.44543	1.66639	1.93731	2.34822	2.77325	3.6307	7.14185	29.1178
0.0573247	0.131176	0.201218	0.248047	0.302505	0.366991	0.464387	0.516389	0.608224	0.724404	0.815892	0.946895	1.07018	1.22333	1.2648	1.44582	1.66909	1.93791	2.35318	2.77325	3.64001	7.14185	29.5301
0.0574014	0.131193	0.201221	0.248047	0.302645	0.367063	0.464415	0.517144	0.608376	0.725255	0.816545	0.949372	1.07058	1.2253	1.2648	1.44593	1.67113	1.93831	2.35318	2.77325	3.64348	7.14185	30.1609
0.0574229	0.131331	0.201382	0.248047	0.302744	0.367322	0.46452	0.517385	0.608598	0.72573	0.816893	0.949711	1.07113	1.22627	1.2648	1.44635	1.67291	1.94437	2.35318	2.77325	3.64574	7.23853	30.3551
0.0574571	0.131354	0.201541	0.248047	0.302905	0.367597	0.464967	0.51799	0.609553	0.726005	0.818464	0.950146	1.07121	1.22685	1.2648	1.44635	1.67534	1.95092	2.35318	2.77325	3.65074	7.29528	30.3632
0.0574759	0.131369	0.201573	0.248047	0.3033	0.36778	0.465624	0.519092	0.611119	0.726386	0.818615	0.951266	1.07139	1.22799	1.2648	1.44635	1.67558	1.95308	2.3542	2.77325	3.67029	7.3314	30.7348
0.0575833	0.131513	0.201624	0.248047	0.303575	0.368151	0.465921	0.519954	0.611152	0.726593	0.818723	0.951308	1.07251	1.23021	1.2648	1.44635	1.68441	1.95368	2.35674	2.77325	3.67809	7.37496	30.8577
0.057601	0.131717	0.201703	0.248047	0.303675	0.368168	0.465938	0.520911	0.611447	0.726814	0.818756	0.953063	1.07435	1.23036	1.2648	1.44635	1.69002	1.96098	2.35777	2.77325	3.68652	7.37496	31.1336
0.0576948	0.131741	0.201801	0.248047	0.303699	0.368393	0.466158	0.521421	0.611941	0.727163	0.820663	0.953687	1.07443	1.23354	1.2648	1.44635	1.69507	1.96429	2.36383	2.77325	3.68748	7.37496	31.3257
0.0577222	0.131989	0.202148	0.248047	0.303856	0.369066	0.466657	0.521585	0.611945	0.728285	0.822245	0.954802	1.07536	1.23416	1.2648	1.44635	1.69743	1.96695	2.37029	2.77325	3.68748	7.39995	31.3335
0.0578334	0.132	0.202205	0.248047	0.304085	0.369398	0.46709	0.521868	0.612955	0.728781	0.822286	0.955337	1.07543	1.23608	1.2648	1.44635	1.70288	1.9716	2.3784	2.77325	3.69969	7.60902	31.4462
0.0579322	0.132001	0.202219	0.248047	0.304503	0.369495	0.467962	0.522705	0.613079	0.728805	0.822637	0.956688	1.07559	1.23631	1.2648	1.44635	1.70609	1.97551	2.38279	2.77325	3.71194	7.77495	31.5371
0.0580885	0.132023	0.202292	0.248047	0.304661	0.369518	0.468514	0.522717	0.61323	0.728997	0.824047	0.956692	1.07578	1.23727	1.2648	1.44635	1.70928	1.97647	2.38647	2.77325	3.72155	7.79779	31.6695
0.0581136	0.132178	0.202485	0.248047	0.304704	0.369916	0.468842	0.523205	0.613237	0.729465	0.825334	0.958258	1.07579	1.23811	1.2648	1.44635	1.71906	1.98438	2.38823	2.77325	3.72585	7.84393	31.685
0.0583196	0.132194	0.202524	0.248047	0.304877	0.370044	0.469454	0.523532	0.613279	0.731021	0.826167	0.959877	1.07838	1.23813	1.2666	1.44635	1.71956	1.98438	2.38852	2.77325	3.72703	7.94137	31.7655
0.0583602	0.13221	0.202584	0.248047	0.304968	0.370387	0.470865	0.523548	0.613618	0.731373	0.826549	0.962638	1.08003	1.24023	1.26826	1.44635	1.72249	1.98438	2.39649	2.77372	3.73593	7.94137	31.7703
0.0583602	0.132216	0.203137	0.248047	0.30524	0.370903	0.471092	0.524677	0.614766	0.733512	0.826783	0.962646	1.08007	1.24023	1.26862	1.44635	1.72564	1.98438	2.39824	2.77711	3.73794	7.94137	31.7742
0.0584257	0.132376	0.203147	0.248047	0.305358	0.37148	0.471507	0.524776	0.615001	0.734229	0.828456	0.962888	1.08121	1.24023	1.27028	1.44635	1.72801	1.98438	2.40195	2.79574	3.74479	7.94137	31.8632
0.0584677	0.132399	0.203154	0.248047	0.305427	0.371525	0.471589	0.524855	0.615228	0.734739	0.829529	0.963983	1.08125	1.24023	1.27038	1.44635	1.73004	1.98438	2.407	2.80633	3.74768	7.94137	31.8892
0.0585215	0.132457	0.203164	0.248047	0.30595	0.372202	0.471749	0.525579	0.615514	0.735003	0.830359	0.964521	1.08172	1.24023	1.27076	1.44635	1.73633	1.98438	2.40809	2.80972	3.75649	7.94137	31.998
0.0586101	0.1325	0.203294	0.248047	0.30687	0.373858	0.472191	0.525807	0.616295	0.735712	0.831886	0.965294	1.08194	1.24023	1.27662	1.44635	1.73633	1.98438	2.409	2.81839	3.75825	7.94137	32.3414
0.0588002	0.132626	0.203538	0.248047	0.306958	0.374291	0.472576	0.525981	0.616922	0.736709	0.832019	0.965333	1.08311	1.24023	1.27692	1.44635	1.73633	1.98438	2.41082	2.82817	3.76943	7.94137	33.0499
0.0589042	0.132738	0.203849	0.248047	0.307043	0.3744	0.472907	0.526319	0.619703	0.736765	0.832316	0.96695	1.08322	1.24023	1.27809	1.44635	1.73633	1.98438	2.4128	2.83376	3.77293	8.07963	33.1242
0.0589487	0.132786	0.203998	0.248047	0.307244	0.374516	0.473179	0.526664	0.61981	0.737398	0.833495	0.967862	1.08347	1.24023	1.28023	1.44635	1.73633	1.98438	2.41473	2.83481	3.77748	8.09368	33.8336
0.0589794	0.132826	0.204724	0.248047	0.307343	0.375582	0.473345	0.52673	0.621367	0.737843	0.833652	0.968748	1.0857	1.24023	1.28199	1.44635	1.73633	1.98438	2.41678	2.84471	3.77814	8.19172	34.015
0.0589843	0.133019	0.20478	0.248047	0.307498	0.375819	0.474144	0.526842	0.621476	0.737892	0.835667	0.96915	1.08682	1.24023	1.28234	1.44635	1.73633	1.98438	2.41878	2.85247	3.78979	8.19281	34.7345
0.0590539	0.133238	0.204839	0.248047	0.307603	0.375956	0.474364	0.526903	0.622179	0.739769	0.835817	0.969515	1.08771	1.24023	1.28264	1.44635	1.73633	1.98438	2.42553	2.85951	3.79439	8.24899	35.165
0.0591749	0.133335	0.205243	0.248047	0.307919	0.376292	0.474938	0.526996	0.622705	0.741303	0.835839	0.970271	1.08862	1.24023	1.28288	1.44635	1.73633	1.98438	2.4369	2.86606	3.79836	8.28907	35.2235
0.0592515	0.133562	0.205256	0.248047	0.308125	0.376376	0.474974	0.528184	0.623783	0.741445	0.836923	0.970423	1.09078	1.24023	1.28328	1.44635	1.73633	1.98438	2.44164	2.87632	3.79837	8.30146	35.9745
0.0592707	0.133609	0.205291	0.248047	0.309184	0.376536	0.47519	0.528295	0.623956	0.741815	0.837119	0.970999	1.09138	1.24023	1.28408	1.44765	1.73633	1.98438	2.44226	2.87836	3.80447	8.33045	35.9805
0.0592755	0.133694	0.20534	0.248047	0.30931	0.376615	0.475255	0.528323	0.624143	0.742033	0.838518	0.971878	1.0915	1.24023	1.28483	1.44921	1.73633	1.98722	2.44267	2.87993	3.81038	8.43724	36.0693
0.059344	0.133851	0.205546	0.248047	0.30942	0.376641	0.475553	0.529268	0.62491	0.742936	0.838736	0.972057	1.0924	1.24023	1.28497	1.45384	1.73633	1.9884	2.44298	2.88768	3.81512	8.52746	36.3987
0.0593642	0.134007	0.205594	0.248047	0.310118	0.376687	0.475891	0.529406	0.625045	0.743104	0.83969	0.973195	1.0937	1.24023	1.28587	1.45598	1.74919	1.98961	2.44298	2.89244	3.82323	8.55312	36.752
0.0594093	0.134073	0.205981	0.248047	0.31024	0.376934	0.476135	0.529473	0.625523	0.74318	0.83987	0.97352	1.09532	1.24023	1.28601	1.45739	1.75396	1.98998	2.4477	2.8927	3.84035	8.63145	36.9997
0.0594103	0.134437	0.2061	0.248047	0.310269	0.376987	0.476276	0.530551	0.626402	0.743322	0.841089	0.974552	1.09669	1.24023	1.28859	1.46008	1.75396	1.9902	2.4494	2.8927	3.84046	8.66521	37.207
0.0594435	0.13455	0.206158	0.248047	0.310282	0.377334	0.476627	0.530663	0.626569	0.743499	0.842371	0.976185	1.09732	1.24023	1.2889	1.46098	1.75396	1.99096	2.46044	2.8927	3.84565	8.69939	37.2896
0.0594699	0.134721	0.206174	0.248047	0.310434	0.377547	0.476669	0.530714	0.627222	0.743538	0.842951	0.976413	1.09779	1.24023	1.29117	1.4645	1.75396	1.99165	2.46053	2.8927	3.85316	8.70953	37.3926
0.0595015	0.134783	0.206231	0.248047	0.310444	0.378151	0.476693	0.530826	0.627714	0.744141	0.844166	0.977002	1.10015	1.24023	1.29205	1.46579	1.75396	1.99307	2.46652	2.8927	3.87462	8.7978	37.5371
0.0595381	0.13483	0.206405	0.248047	0.31055	0.378214	0.476761	0.53112	0.627898	0.744141	0.844765	0.97724	1.10022	1.24023	1.29218	1.46777	1.75396	1.99423	2.46699	2.90012	3.87462	8.96407	37.7007
0.0595594	0.135086	0.206678	0.248047	0.310779	0.378289	0.476787	0.532087	0.630288	0.744141	0.846	0.978239	1.10035	1.24023	1.29296	1.47096	1.75396	1.998	2.46877	2.92879	3.87462	9.02904	37.7235
0.059696	0.135125	0.206719	0.248047	0.311194	0.378302	0.477012	0.532368	0.631268	0.744141	0.846744	0.978299	1.10356	1.24023	1.29317	1.47103	1.75396	1.99925	2.46905	2.93246	3.87462	9.12732	37.7504
0.0597274	0.135215	0.206953	0.248047	0.311271	0.378344	0.477275	0.532472	0.631736	0.744141	0.846829	0.978609	1.1038	1.24023	1.2936	1.47167	1.75396	1.99946	2.47001	2.93523	3.88077	9.38981	37.7618
0.0597279	0.135252	0.207187	0.248047	0.311954	0.379178	0.477311	0.532784	0.63238	0.744141	0.847293	0.979519	1.10403	1.24023	1.29362	1.47443	1.75396	1.99982	2.47408	2.94726	3.88542	9.49731	38.0224
0.0597376	0.135298	0.207352	0.248047	0.312244	0.379512	0.477404	0.533426	0.632835	0.744141	0.847485	0.979537	1.10481	1.24023	1.29436	1.47455	1.75396	1.99982	2.47421	2.94883	3.89394	9.58437	38.1581
0.0598525	0.135394	0.207449	0.248047	0.312715	0.379688	0.477943	0.533614	0.633524	0.744141	0.848799	0.979626	1.10518	1.24023	1.29453	1.47522	1.75396	1.99982	2.47537	2.95769	3.89986	9.75301	38.1992
0.0598643	0.13566	0.20747	0.248047	0.313111	0.380431	0.478295	0.534513	0.633566	0.744141	0.849715	0.979652	1.1054	1.24023	1.29608	1.47634	1.75396	1.99982	2.48047	2.95949	3.91018	9.87526	38.3375
0.0599189	0.135752	0.207493	0.248047	0.313468	0.380506	0.478339	0.535113	0.633641	0.744141	0.851383	0.980137	1.10549	1.24023	1.29664	1.47777	1.75396	1.99982	2.48047	2.97385	3.92197	10.0727	38.708
0.0599927	0.136096	0.207727	0.248047	0.313779	0.380835	0.478742	0.535164	0.63461	0.744141	0.853646	0.980643	1.1057	1.24023	1.29688	1.47918	1.75396	1.99982	2.48047	2.98688	3.94123	10.8717	38.8294
0.0599952	0.136331	0.207798	0.248047	0.313982	0.381324	0.478945	0.536337	0.637781	0.744141	0.854259	0.981214	1.10582	1.24023	1.29846	1.47973	1.75396	1.99982	2.48047	2.99256	3.94594	10.8717	39.251
0.0600686	0.136411	0.207846	0.248047	0.314058	0.382065	0.479004	0.536936	0.637902	0.744141	0.854882	0.981875	1.1059	1.24023	1.30013	1.48026	1.75396	1.99982	2.48047	2.99258	3.98642	10.9394	39.5516
0.0601667	0.13653	0.208027	0.248047	0.314172	0.382489	0.479084	0.539	0.638733	0.744141	0.85546	0.982457	1.10702	1.24023	1.30176	1.48828	1.75396	1.99982	2.48047	2.99716	3.99817	11.0624	39.7371
0.0601682	0.136625	0.208078	0.248047	0.314437	0.382702	0.479753	0.539034	0.63886	0.744141	0.855971	0.982717	1.10915	1.24023	1.30241	1.48828	1.75396	2.00281	2.48047	3.00212	3.99964	11.2963	40.4042
0.0602718	0.136643	0.208348	0.248047	0.315025	0.382736	0.479996	0.539198	0.638938	0.744141	0.856308	0.982912	1.1093	1.24023	1.30241	1.48828	1.75396	2.00374	2.48047	3.00308	4.00732	11.3588	40.4522
0.0603463	0.136685	0.208404	0.248047	0.315171	0.383237	0.480425	0.540379	0.639095	0.744141	0.856848	0.983706	1.1093	1.24023	1.30274	1.48828	1.75396	2.00812	2.48047	3.00412	4.00732	11.4102	40.5077
0.0604064	0.136735	0.208472	0.248047	0.315202	0.384929	0.480881	0.540794	0.639346	0.744141	0.856908	0.983866	1.1093	1.24023	1.30309	1.48828	1.75396	2.01866	2.48047	3.01363	4.03997	11.5308	40.6441
0.0605013	0.136824	0.20897	0.248047	0.315331	0.385001	0.482	0.540912	0.639378	0.744141	0.857638	0.984862	1.1093	1.24023	1.30358	1.48828	1.75396	2.02148	2.48047	3.02715	4.05142	11.8259	40.6509
0.0605422	0.136913	0.209117	0.248047	0.315854	0.385529	0.482458	0.54096	0.639478	0.744141	0.857854	0.985558	1.1093	1.24023	1.30488	1.48828	1.75396	2.02508	2.48047	3.0278	4.05499	11.8337	40.796
0.0606783	0.137039	0.209291	0.248047	0.316442	0.385843	0.484553	0.541267	0.639768	0.744141	0.857938	0.985616	1.1093	1.24023	1.30538	1.48828	1.75396	2.02892	2.48047	3.0278	4.06827	11.8467	40.9465
0.060686	0.137179	0.209353	0.248047	0.316577	0.386125	0.484748	0.541295	0.64055	0.744141	0.859024	0.986165	1.1093	1.24023	1.30715	1.48828	1.75396	2.03093	2.48047	3.0278	4.06827	12.0015	41.104
0.0607058	0.137439	0.20948	0.248047	0.316815	0.386388	0.485209	0.541572	0.640903	0.744141	0.859106	0.986381	1.1093	1.24023	1.30805	1.48828	1.75396	2.03828	2.48047	3.0278	4.06827	12.0807	41.1825
0.06075	0.137522	0.20952	0.248047	0.317273	0.386434	0.485724	0.541841	0.641016	0.744141	0.859401	0.986495	1.1093	1.24023	1.30987	1.48828	1.75396	2.04355	2.48047	3.0278	4.06827	12.1239	41.3316
0.0608155	0.137566	0.209649	0.248047	0.317502	0.386617	0.486415	0.542197	0.642251	0.744141	0.859638	0.989918	1.1093	1.24023	1.31081	1.49362	1.75396	2.04545	2.48047	3.0278	4.09089	12.2375	41.3547
0.0609036	0.137569	0.21007	0.248047	0.318011	0.386914	0.486914	0.542252	0.642571	0.744141	0.859772	0.990269	1.1093	1.24023	1.31087	1.49715	1.75396	2.04899	2.48047	3.03249	4.10512	12.3152	41.498
0.0610387	0.137613	0.210143	0.248047	0.31845	0.387601	0.487407	0.542258	0.643128	0.744141	0.862491	0.990563	1.1093	1.24023	1.31112	1.49761	1.75396	2.05328	2.48047	3.03256	4.10591	12.4741	41.5358
0.0611447	0.137899	0.210261	0.248047	0.318541	0.387723	0.48758	0.542738	0.643715	0.744141	0.862624	0.991438	1.1093	1.24023	1.31249	1.50008	1.75396	2.05628	2.48047	3.04495	4.10591	12.4913	42.0255
0.0611647	0.138036	0.210362	0.248047	0.318579	0.387874	0.48773	0.544004	0.643805	0.744141	0.862871	0.992188	1.1093	1.24023	1.31266	1.50032	1.75396	2.07374	2.48047	3.04556	4.10734	12.5503	42.2409
0.0611827	0.138073	0.210471	0.248047	0.318902	0.38792	0.48787	0.544974	0.64492	0.744141	0.863932	0.992188	1.1093	1.24023	1.31369	1.5024	1.75396	2.08069	2.48047	3.05773	4.16055	12.8051	42.4479
0.061194	0.138327	0.211306	0.248047	0.319542	0.388109	0.488714	0.545366	0.645325	0.744141	0.864025	0.992188	1.1093	1.24023	1.31384	1.50296	1.75396	2.08507	2.48047	3.05814	4.2168	12.8051	42.6734
0.0612104	0.138346	0.211472	0.248047	0.31967	0.388431	0.488717	0.54645	0.645627	0.744141	0.864184	0.992188	1.1093	1.24023	1.31391	1.50604	1.75396	2.08975	2.48047	3.05934	4.2168	12.9484	42.8202
0.0612141	0.138489	0.21154	0.248047	0.320011	0.388858	0.4891	0.546681	0.645857	0.744141	0.864246	0.992188	1.10998	1.24023	1.31467	1.50699	1.75396	2.10016	2.48047	3.06065	4.22635	13.0996	42.8317
0.0614606	0.138687	0.211631	0.248047	0.320122	0.389298	0.490424	0.547253	0.645879	0.744141	0.864303	0.992188	1.11057	1.24023	1.31654	1.50881	1.75396	2.10056	2.48047	3.06068	4.22893	13.2676	42.9859
0.0615358	0.138863	0.211729	0.248047	0.320319	0.389312	0.490639	0.547541	0.64592	0.744141	0.864558	0.992188	1.11073	1.24023	1.31706	1.50881	1.75396	2.10475	2.48047	3.07486	4.24807	13.4884	43.1609
0.0616438	0.139048	0.211734	0.248047	0.320537	0.389377	0.490877	0.547974	0.646272	0.744141	0.864729	0.992188	1.11127	1.24023	1.31738	1.50881	1.75396	2.10475	2.48047	3.07557	4.26756	13.4952	43.2463
0.0616546	0.13945	0.211805	0.248047	0.321214	0.38954	0.491202	0.548258	0.646557	0.744141	0.865234	0.992188	1.11268	1.24023	1.31742	1.50881	1.75396	2.10632	2.48274	3.07558	4.3053	13.4998	43.3806
0.0616759	0.139471	0.212098	0.248047	0.321235	0.389562	0.492481	0.548502	0.647846	0.744141	0.866134	0.992188	1.1141	1.24023	1.31818	1.50881	1.75396	2.10775	2.49274	3.07876	4.33905	13.4998	43.4082
0.0617318	0.139747	0.212345	0.248047	0.321237	0.39041	0.492621	0.548935	0.649188	0.744141	0.866307	0.992188	1.1144	1.24023	1.31855	1.50881	1.75396	2.11129	2.49284	3.08473	4.34106	13.5702	43.5469
0.0617624	0.139768	0.212568	0.248047	0.321418	0.391442	0.493492	0.548966	0.649969	0.744141	0.866566	0.992188	1.11554	1.24023	1.31902	1.50881	1.75396	2.11652	2.49284	3.09617	4.41635	13.5702	43.9519
0.0618918	0.139913	0.212575	0.248047	0.321599	0.391647	0.493539	0.549862	0.651931	0.744141	0.866961	0.992188	1.11931	1.24023	1.32503	1.50881	1.75396	2.11931	2.49284	3.10802	4.43617	13.6493	43.989
0.061903	0.139994	0.21282	0.248047	0.322418	0.391697	0.49376	0.550287	0.652112	0.744141	0.868032	0.992188	1.11989	1.24023	1.32677	1.50881	1.75396	2.12419	2.49284	3.10802	4.4426	13.7325	44.153
0.0619383	0.140035	0.214271	0.248047	0.322746	0.392222	0.493933	0.551695	0.652209	0.744141	0.869627	0.992188	1.12119	1.24023	1.32964	1.50881	1.75396	2.13215	2.4992	3.11222	4.45998	13.7325	44.2498
0.0619478	0.140172	0.214372	0.248047	0.322824	0.392317	0.493933	0.552217	0.653172	0.744141	0.870015	0.992188	1.12151	1.24023	1.33003	1.50881	1.75396	2.13378	2.50415	3.11244	4.46814	13.884	44.4032
0.0619642	0.14026	0.2144	0.248047	0.323046	0.392371	0.494896	0.552364	0.654436	0.744141	0.870928	0.992188	1.12362	1.24023	1.33019	1.50881	1.75396	2.13378	2.50654	3.11803	4.47173	13.9657	44.5836
0.0619939	0.140329	0.214421	0.248047	0.323356	0.392422	0.495196	0.552794	0.654788	0.744141	0.871029	0.992188	1.12383	1.24023	1.3321	1.50881	1.75396	2.13378	2.50793	3.11945	4.47173	14.1234	44.9793
0.0620178	0.14052	0.214462	0.248047	0.323437	0.392428	0.495516	0.55291	0.655379	0.744141	0.871251	0.992188	1.12394	1.24023	1.33414	1.50881	1.75598	2.13378	2.5083	3.12113	4.47173	14.1995	45.3512
0.0620883	0.140592	0.214682	0.248047	0.32348	0.392455	0.495805	0.553944	0.655446	0.744141	0.871949	0.992188	1.1244	1.24023	1.33425	1.51804	1.75761	2.13378	2.50877	3.12207	4.47173	14.2449	45.6952
0.062143	0.140643	0.215116	0.248047	0.324053	0.392558	0.496047	0.554551	0.655509	0.744141	0.872017	0.992188	1.12456	1.24023	1.33494	1.52356	1.75988	2.13378	2.51563	3.12256	4.47173	14.2449	45.7544
0.0621854	0.140664	0.215193	0.248047	0.324087	0.392605	0.496094	0.55465	0.656066	0.744141	0.872759	0.992188	1.12535	1.24023	1.33532	1.52388	1.76276	2.13378	2.52518	3.1232	4.47173	14.2837	46.166
0.0622006	0.140715	0.215319	0.248047	0.324157	0.392728	0.496094	0.55465	0.656314	0.744141	0.873754	0.992188	1.12688	1.24023	1.33553	1.52439	1.7663	2.13378	2.52925	3.125	4.47173	14.3824	46.2326
0.0623703	0.141045	0.21556	0.248047	0.324715	0.392729	0.496094	0.55465	0.656385	0.746333	0.873807	0.992188	1.12736	1.24023	1.33577	1.52788	1.7685	2.13378	2.52959	3.12877	4.4866	14.4635	46.4954
0.0624006	0.141076	0.215693	0.248047	0.324858	0.393248	0.496094	0.55465	0.657337	0.746509	0.873976	0.992188	1.12968	1.24023	1.33577	1.52822	1.7701	2.13378	2.52959	3.13104	4.48861	14.5356	46.7652
0.0625511	0.14114	0.215867	0.248047	0.325259	0.394656	0.496094	0.55465	0.658958	0.747509	0.874369	0.992188	1.12994	1.24023	1.33577	1.53	1.77044	2.13378	2.52963	3.13223	4.49342	14.5356	46.8283
0.0625802	0.141269	0.216176	0.248047	0.325752	0.395085	0.496094	0.55465	0.659012	0.747898	0.874773	0.992188	1.13154	1.24023	1.33577	1.53321	1.77276	2.13378	2.53716	3.13417	4.51321	14.5356	47.2892
0.0626032	0.141369	0.21649	0.248047	0.325774	0.39523	0.496094	0.55465	0.659787	0.748425	0.875268	0.992188	1.13237	1.24023	1.33577	1.53438	1.77289	2.13378	2.54004	3.1362	4.51751	14.5906	47.7179
0.0626883	0.141398	0.216565	0.248047	0.325872	0.395532	0.496094	0.55465	0.660309	0.748609	0.876178	0.992188	1.1324	1.24023	1.33577	1.53499	1.77313	2.13378	2.54268	3.14255	4.55354	14.6767	48.2877
0.0627996	0.141487	0.216574	0.248047	0.326114	0.395716	0.496094	0.55465	0.661661	0.749369	0.876336	0.992188	1.13392	1.24023	1.33577	1.53764	1.77485	2.13378	2.54355	3.15712	4.61798	14.8352	48.7594
0.062828	0.141564	0.216787	0.248047	0.32668	0.39614	0.496094	0.55465	0.661669	0.750017	0.876965	0.992188	1.13398	1.24023	1.33577	1.53811	1.78005	2.14109	2.54636	3.15873	4.63312	14.8828	49.4236
0.0628632	0.141791	0.216904	0.248047	0.326745	0.396257	0.496094	0.55465	0.662189	0.75004	0.877326	0.992188	1.13444	1.24023	1.33577	1.53814	1.78869	2.1499	2.55289	3.17655	4.6339	14.8828	49.5411
0.0629052	0.141802	0.216919	0.248047	0.327053	0.396449	0.496094	0.55465	0.662917	0.750592	0.877433	0.992188	1.13456	1.24023	1.33577	1.54362	1.78869	2.15757	2.5538	3.17655	4.68014	14.9755	49.6249
0.0629879	0.141868	0.216938	0.248047	0.327263	0.39661	0.496094	0.55465	0.66297	0.750673	0.878757	0.992188	1.13463	1.24023	1.33577	1.54566	1.78869	2.16581	2.5538	3.18331	4.68014	15.0677	50.0299
0.0630099	0.141872	0.217158	0.248047	0.327521	0.39661	0.496094	0.55465	0.663	0.751752	0.879941	0.992188	1.13515	1.24023	1.33577	1.54725	1.78869	2.16638	2.5538	3.18498	4.74669	15.1064	50.0766
0.0631776	0.142666	0.217174	0.248047	0.327581	0.396984	0.496094	0.55465	0.663232	0.75178	0.880391	0.992188	1.13592	1.24023	1.33577	1.55289	1.78869	2.16858	2.5538	3.18742	4.76482	15.1125	50.2067
0.0631849	0.142758	0.217199	0.248047	0.327585	0.397173	0.496094	0.55465	0.663329	0.75215	0.882576	0.992188	1.13618	1.24023	1.33577	1.55629	1.78869	2.16859	2.5538	3.18976	4.77128	15.218	50.2067
0.0632044	0.142876	0.21723	0.248047	0.327927	0.397633	0.496094	0.55465	0.664305	0.753186	0.883448	0.992188	1.13647	1.24023	1.33577	1.55901	1.78869	2.17038	2.5538	3.19175	4.79495	15.2281	50.5097
0.0632526	0.142942	0.217307	0.248047	0.327949	0.397671	0.496094	0.55465	0.664723	0.754024	0.884079	0.992188	1.13671	1.24023	1.33577	1.55962	1.78869	2.17096	2.5538	3.19763	4.89225	15.2302	50.5493
0.0632599	0.143016	0.217403	0.248047	0.328866	0.397743	0.496094	0.55465	0.665331	0.756893	0.884891	0.992188	1.13733	1.24023	1.33577	1.56113	1.78869	2.17115	2.5538	3.19924	4.91863	15.3007	50.7551
0.0632652	0.14304	0.217414	0.248047	0.32898	0.397801	0.496094	0.55465	0.665813	0.756974	0.885328	0.992188	1.13811	1.24023	1.33577	1.56158	1.79006	2.17361	2.56249	3.22043	4.92359	15.3409	50.9004
0.0633334	0.143124	0.217418	0.248047	0.32934	0.39808	0.496094	0.55465	0.666617	0.757132	0.885692	0.992188	1.13813	1.24023	1.33577	1.56603	1.79249	2.179	2.56868	3.22461	4.92987	15.3749	50.9342
0.0633425	0.143241	0.217866	0.248047	0.329427	0.398143	0.496094	0.55465	0.666869	0.757145	0.885696	0.992188	1.14012	1.24023	1.33577	1.56728	1.79517	2.18078	2.5721	3.22461	4.97763	15.3749	51.1271
0.063483	0.143284	0.217867	0.248047	0.329835	0.398316	0.496094	0.55465	0.667123	0.757193	0.885712	0.992188	1.14046	1.24023	1.33577	1.5675	1.79562	2.18304	2.57721	3.23865	5.01644	15.4029	52.282
0.0635631	0.143396	0.218609	0.248047	0.330215	0.39851	0.496094	0.55465	0.66818	0.759066	0.886261	0.992188	1.14164	1.24023	1.33577	1.56879	1.79843	2.18685	2.57767	3.24413	5.02331	15.4448	52.3026
0.0635713	0.143437	0.218741	0.248047	0.330528	0.39858	0.496094	0.55465	0.669156	0.759675	0.886366	0.992188	1.14848	1.24023	1.33577	1.56879	1.79899	2.19098	2.57815	3.24904	5.0895	15.4706	52.5684
0.0635757	0.143523	0.218872	0.248047	0.330534	0.398598	0.496094	0.55465	0.669366	0.760753	0.886458	0.992188	1.14992	1.24023	1.33577	1.56879	1.79993	2.19369	2.58072	3.25579	5.0931	15.5777	52.7868
0.0636	0.143584	0.218903	0.248047	0.330919	0.398738	0.496094	0.55465	0.669435	0.760934	0.886754	0.992188	1.15066	1.24023	1.33577	1.56879	1.80126	2.19594	2.5815	3.25978	5.1076	15.6191	53.0113
0.0637249	0.143875	0.218991	0.248047	0.330965	0.398815	0.496094	0.55465	0.669741	0.760954	0.887103	0.992188	1.15082	1.24023	1.33577	1.56879	1.80291	2.19753	2.58969	3.26179	5.1076	15.6447	53.1029
0.063777	0.14401	0.219215	0.248047	0.331415	0.39961	0.496094	0.55465	0.670219	0.761224	0.887222	0.992188	1.15138	1.24023	1.33577	1.56879	1.80294	2.1994	2.58969	3.26255	5.11362	15.6977	53.1915
0.0638147	0.144015	0.219285	0.248047	0.331431	0.399762	0.496094	0.55465	0.670368	0.762612	0.88774	0.992188	1.15425	1.24023	1.33577	1.57147	1.80415	2.21182	2.58969	3.26485	5.11362	15.7231	53.496
0.0638751	0.144117	0.219335	0.248047	0.33162	0.39978	0.496094	0.55465	0.670702	0.76361	0.888044	0.992188	1.15605	1.24023	1.33727	1.57578	1.80581	2.2144	2.58969	3.26989	5.12125	15.8012	53.845
0.0640367	0.144448	0.219499	0.248047	0.331679	0.400405	0.496094	0.554758	0.671206	0.763677	0.888211	0.992188	1.15615	1.24023	1.33863	1.57671	1.80581	2.2186	2.58969	3.27293	5.14571	15.8769	53.8947
0.0640742	0.144602	0.219822	0.248047	0.332032	0.401251	0.496094	0.554852	0.672875	0.764001	0.88942	0.992188	1.15632	1.24023	1.34182	1.57927	1.80581	2.2186	2.58969	3.27383	5.15622	16.123	53.8947
0.0640913	0.144737	0.219957	0.248047	0.332119	0.401538	0.496094	0.555084	0.673429	0.765064	0.889462	0.992188	1.15712	1.24023	1.34276	1.58117	1.80581	2.2186	2.58969	3.28206	5.21489	16.1402	54.1544
0.0641484	0.144946	0.219999	0.248047	0.332207	0.402147	0.496094	0.55539	0.674295	0.765091	0.889592	0.992188	1.1573	1.24023	1.3461	1.58827	1.80581	2.2186	2.58969	3.29554	5.26187	16.1593	54.1595
0.064265	0.145207	0.220085	0.248047	0.332884	0.402171	0.496094	0.555751	0.674433	0.765272	0.890657	0.992188	1.15752	1.24023	1.34944	1.58827	1.80581	2.2186	2.5905	3.30849	5.30264	16.3372	54.2021
0.064349	0.145422	0.22009	0.248047	0.333169	0.402733	0.496094	0.555844	0.675426	0.765671	0.891095	0.992188	1.159	1.24023	1.35195	1.58827	1.80581	2.2186	2.60607	3.31675	5.32579	16.5319	54.3268
0.06436	0.145526	0.22034	0.248185	0.333495	0.40307	0.496094	0.556128	0.676361	0.765784	0.891113	0.992188	1.15943	1.24023	1.3521	1.58827	1.8116	2.21873	2.60875	3.31723	5.40426	16.6635	54.3896
0.0643758	0.145541	0.22118	0.248459	0.333622	0.403227	0.496094	0.556196	0.677489	0.766828	0.891736	0.992188	1.1604	1.24023	1.35467	1.58827	1.81448	2.22147	2.60896	3.31729	5.44009	16.8909	54.4354
0.0644354	0.145544	0.221268	0.248475	0.333645	0.403572	0.496094	0.556421	0.677756	0.767026	0.89228	0.992188	1.1612	1.24023	1.35763	1.58827	1.81459	2.22345	2.6109	3.31869	5.46267	16.9291	54.4552
0.0644379	0.14559	0.221296	0.248574	0.334107	0.405075	0.496094	0.556562	0.677807	0.767815	0.892368	0.992188	1.16308	1.24023	1.35819	1.58827	1.8157	2.23179	2.61942	3.322	5.49117	16.9436	54.5844
0.0645119	0.145689	0.221502	0.248856	0.334373	0.405279	0.496094	0.557807	0.677923	0.768867	0.893506	0.992188	1.16362	1.24023	1.35894	1.58827	1.81801	2.23242	2.62094	3.32278	5.5465	17.036	54.5906
0.0645238	0.145776	0.221852	0.248878	0.335358	0.405391	0.496094	0.558037	0.678036	0.76974	0.894025	0.992188	1.16511	1.24023	1.36011	1.58827	1.8211	2.23242	2.62127	3.32313	5.5465	17.0648	54.9131
0.0645325	0.145897	0.221899	0.248879	0.335869	0.405466	0.496094	0.558144	0.67897	0.769927	0.894106	0.992188	1.16554	1.24023	1.36981	1.58827	1.82118	2.23242	2.62701	3.32536	5.5465	17.0648	55.4633
0.064549	0.145949	0.221913	0.248991	0.336433	0.405755	0.496094	0.558167	0.679518	0.771567	0.894346	0.992188	1.16773	1.24023	1.37208	1.58827	1.8243	2.23242	2.63677	3.32589	5.57416	17.144	55.8375
0.0647485	0.145962	0.221934	0.249008	0.336873	0.406269	0.496094	0.558315	0.682676	0.772714	0.894346	0.992188	1.16878	1.24023	1.37283	1.58827	1.82543	2.23242	2.64076	3.3279	5.59619	17.2745	56.2416
0.064776	0.145996	0.222016	0.249395	0.336982	0.406726	0.496094	0.558739	0.683268	0.77281	0.894346	0.992188	1.17118	1.24023	1.37318	1.58827	1.8255	2.23242	2.64168	3.33428	5.61321	17.3367	56.4071
0.0647831	0.146033	0.2222	0.249489	0.337046	0.406822	0.496094	0.559203	0.683372	0.773108	0.894346	0.99365	1.17166	1.24023	1.37598	1.58827	1.83109	2.23242	2.64406	3.33563	5.62361	17.3633	56.8466
0.0647846	0.146089	0.222353	0.249605	0.337058	0.406871	0.496094	0.559902	0.683974	0.774203	0.894346	0.994803	1.1723	1.24023	1.37635	1.58827	1.83831	2.23242	2.64586	3.33713	5.76942	17.3721	57.6238
0.0647879	0.146274	0.222522	0.25059	0.337103	0.407901	0.496094	0.560048	0.684081	0.774766	0.894346	0.996328	1.17282	1.24023	1.37801	1.58827	1.84102	2.23242	2.6495	3.33713	5.78128	17.5956	57.7997
0.0649911	0.146518	0.222617	0.250739	0.33731	0.408243	0.496094	0.560419	0.684464	0.775086	0.894346	0.997433	1.17484	1.24023	1.37819	1.58827	1.8427	2.23242	2.6597	3.33713	5.81192	17.6811	57.8992
0.0650093	0.146577	0.222631	0.251254	0.338242	0.408757	0.496094	0.560931	0.684867	0.77613	0.894346	0.997518	1.17491	1.24023	1.37916	1.58827	1.84724	2.23242	2.66818	3.33713	5.89601	17.6811	57.957
0.0651085	0.147056	0.222712	0.251615	0.339041	0.408997	0.496094	0.561015	0.685381	0.777422	0.894346	0.998387	1.17541	1.24023	1.37947	1.58827	1.84921	2.23242	2.67155	3.33713	5.89601	17.8214	59.5999
0.0651344	0.147072	0.22288	0.25202	0.339581	0.409041	0.496094	0.561627	0.685429	0.777592	0.894346	0.99862	1.1756	1.24023	1.38009	1.58827	1.85523	2.23278	2.67155	3.33713	5.95312	17.8214	59.619
0.0651415	0.147087	0.222992	0.252022	0.340371	0.40906	0.496094	0.562145	0.685628	0.77836	0.894346	0.998639	1.18005	1.24023	1.38037	1.58827	1.86132	2.23359	2.67155	3.34428	5.99432	17.9641	59.6603
0.0651766	0.147241	0.223074	0.252355	0.340387	0.409075	0.496094	0.562499	0.685954	0.779226	0.894346	0.999013	1.18053	1.24023	1.38338	1.58827	1.86397	2.23605	2.67155	3.35293	5.99945	18.0137	61.67
0.0652201	0.147297	0.223082	0.252932	0.340584	0.40923	0.496094	0.562917	0.686632	0.780149	0.894346	1.00092	1.18182	1.24023	1.38559	1.58827	1.86412	2.23986	2.67155	3.35721	6.01116	18.1668	62.2326
0.0653246	0.147422	0.223083	0.252976	0.340618	0.409244	0.496094	0.563425	0.686933	0.783806	0.894346	1.00234	1.18194	1.24023	1.38807	1.58827	1.86668	2.24133	2.67155	3.36949	6.04568	18.2411	62.3195
0.0653303	0.147482	0.223503	0.253093	0.340906	0.410177	0.496094	0.563738	0.688808	0.78388	0.894346	1.00319	1.18489	1.24023	1.3893	1.58827	1.86881	2.24134	2.67155	3.36969	6.0556	18.2546	62.3669
0.0653407	0.147567	0.223543	0.253102	0.341009	0.410181	0.496094	0.563741	0.689117	0.783981	0.894346	1.0046	1.18631	1.24023	1.39081	1.58827	1.86943	2.24585	2.67155	3.3738	6.12631	18.2563	62.5177
0.0654069	0.147589	0.223638	0.253274	0.341428	0.410317	0.496094	0.564644	0.690118	0.784393	0.894346	1.0047	1.18632	1.24023	1.39491	1.58827	1.8706	2.24616	2.67155	3.37885	6.22098	18.3018	62.5963
0.0654451	0.147634	0.22364	0.253488	0.341751	0.410521	0.496094	0.564672	0.690202	0.784393	0.894346	1.00537	1.18999	1.24023	1.39595	1.5887	1.87386	2.24616	2.67155	3.39521	6.27514	18.4057	63.6587
0.0654723	0.147645	0.223796	0.253752	0.341778	0.4125	0.496094	0.565008	0.690694	0.784393	0.894346	1.00573	1.19066	1.24023	1.39817	1.59046	1.87582	2.24675	2.67155	3.40054	6.33856	18.6448	63.7254
0.0654846	0.147705	0.223878	0.253791	0.34189	0.412508	0.496094	0.565122	0.694295	0.784393	0.894346	1.00684	1.19216	1.24023	1.39992	1.59169	1.88209	2.24896	2.67155	3.40934	6.3531	18.737	64.4865
0.0655431	0.147727	0.223884	0.254507	0.341963	0.413658	0.496094	0.565176	0.695569	0.784393	0.89551	1.00693	1.19349	1.24023	1.40163	1.59253	1.88907	2.25171	2.67369	3.41099	6.35794	18.8532	64.7212
0.0656834	0.147829	0.224024	0.254602	0.342008	0.414138	0.496094	0.565248	0.695843	0.784393	0.895581	1.00714	1.19527	1.24023	1.40239	1.59282	1.88907	2.27213	2.67902	3.41654	6.40134	18.9946	64.8651
0.0656834	0.147834	0.224037	0.254927	0.342115	0.415896	0.496094	0.565305	0.695976	0.784393	0.896961	1.00883	1.19593	1.24023	1.40257	1.59387	1.88907	2.27638	2.68269	3.4212	6.43967	19.0625	64.9153
0.0656932	0.14789	0.22414	0.255382	0.342677	0.416339	0.496094	0.565402	0.696796	0.784393	0.89722	1.01046	1.19664	1.24023	1.40317	1.59516	1.89034	2.28632	2.68304	3.4413	6.43967	19.1382	65.1953
0.0656956	0.147903	0.224208	0.255508	0.342954	0.416794	0.496094	0.566163	0.697163	0.784393	0.897293	1.01095	1.19666	1.24023	1.40317	1.59574	1.89404	2.28688	2.68304	3.44598	6.43967	19.2967	65.5769
0.0657218	0.147982	0.22425	0.255618	0.343368	0.417189	0.496094	0.56646	0.697763	0.784393	0.898247	1.01161	1.19738	1.24023	1.40317	1.59632	1.89601	2.28688	2.68814	3.45489	6.43967	19.3747	65.7118
0.0658111	0.14811	0.2244	0.25598	0.343486	0.417273	0.496094	0.567246	0.698047	0.784393	0.902618	1.01194	1.19783	1.24023	1.40317	1.60865	1.89664	2.28688	2.69776	3.46152	6.44922	19.4492	65.8928
0.065826	0.148292	0.224796	0.256603	0.343495	0.417382	0.496094	0.567898	0.698641	0.784393	0.90382	1.01285	1.19819	1.24023	1.40465	1.6112	1.90149	2.29766	2.71981	3.47266	6.46827	19.6568	66.0126
0.0659498	0.148373	0.224963	0.256769	0.343555	0.417571	0.496094	0.568219	0.698701	0.784393	0.903844	1.0135	1.20084	1.24023	1.40553	1.61259	1.90296	2.29852	2.72	3.47896	6.51094	19.7225	68.1642
0.0660291	0.148376	0.225075	0.256925	0.343906	0.418178	0.496094	0.569045	0.699295	0.784393	0.904963	1.01376	1.2014	1.24023	1.40648	1.61545	1.90404	2.31945	2.72409	3.48631	6.51094	19.7972	69.2331
0.0661422	0.148581	0.225135	0.257126	0.34415	0.419242	0.496094	0.570087	0.700114	0.784393	0.905776	1.01489	1.20417	1.24023	1.40721	1.62483	1.9051	2.32196	2.72836	3.49281	6.55332	19.8438	69.4974
0.066165	0.148726	0.22519	0.257727	0.344234	0.419377	0.496094	0.570137	0.70037	0.784393	0.906055	1.01519	1.20444	1.24023	1.40842	1.62706	1.90742	2.32246	2.72852	3.49413	6.59077	19.8577	71.4392
0.0662359	0.148758	0.225382	0.257727	0.344719	0.419608	0.496094	0.571616	0.701583	0.784393	0.906418	1.01527	1.20586	1.24023	1.4112	1.62722	1.90812	2.32381	2.75012	3.50515	6.59077	20.1911	72.7945
0.0662534	0.148825	0.225572	0.258486	0.344895	0.419708	0.496094	0.57191	0.701583	0.784393	0.906786	1.0175	1.20678	1.24023	1.41298	1.63006	1.90994	2.32416	2.75234	3.50791	6.59077	20.299	73.8705
0.0662653	0.14891	0.225633	0.258654	0.345334	0.41986	0.496094	0.571955	0.701583	0.784393	0.906911	1.01894	1.20705	1.24023	1.41431	1.63141	1.91784	2.32847	2.75788	3.50791	6.67887	20.4093	74.7428
0.066283	0.148981	0.225662	0.258812	0.345408	0.420364	0.496094	0.572467	0.701583	0.784393	0.906968	1.01906	1.20709	1.24023	1.41546	1.63233	1.92115	2.32859	2.76275	3.50791	6.67887	20.5565
0.0664583	0.148985	0.225847	0.258855	0.346125	0.420412	0.496094	0.572825	0.701583	0.784393	0.907029	1.01921	1.20772	1.24023	1.4158	1.6353	1.92405	2.33468	2.76696	3.50791	6.67887	20.558
0.0667472	0.149114	0.226106	0.258966	0.346464	0.420435	0.496094	0.573223	0.701583	0.784393	0.908461	1.02193	1.20887	1.24023	1.41619	1.64065	1.92586	2.33598	2.77108	3.50791	6.67887	20.7234
0.0667478	0.149323	0.226538	0.259016	0.346521	0.420569	0.496094	0.573582	0.701583	0.784393	0.909267	1.02272	1.20888	1.24023	1.41882	1.64161	1.92641	2.34007	2.77325	3.50791	6.67887	20.7798
0.0668515	0.149363	0.226649	0.25925	0.346537	0.42107	0.496094	0.573946	0.701654	0.784414	0.913934	1.02272	1.20941	1.24023	1.41914	1.64484	1.92744	2.34007	2.77325	3.50791	6.67887	20.9611
0.0669029	0.149489	0.226824	0.259447	0.346656	0.421792	0.496094	0.574227	0.701827	0.784603	0.914301	1.02272	1.20947	1.24023	1.4207	1.6475	1.92875	2.34007	2.77325	3.50791	6.67887	21.0738
0.0670586	0.149534	0.226921	0.259727	0.346952	0.421849	0.496094	0.574373	0.701955	0.784737	0.917015	1.02272	1.2097	1.24038	1.42106	1.64759	1.92987	2.34007	2.77325	3.50791	6.67887	21.2931
0.0673571	0.149741	0.22696	0.260073	0.347126	0.421924	0.496094	0.574807	0.70329	0.785074	0.917112	1.02272	1.21162	1.24375	1.42285	1.65022	1.93208	2.34007	2.77325	3.50847	6.67887	21.4256
0.0673659	0.149818	0.227164	0.26024	0.347152	0.422289	0.496094	0.575109	0.703302	0.785248	0.917352	1.02272	1.21748	1.2444	1.42355	1.65103	1.93335	2.34007	2.77325	3.51273	6.75625	21.5915
0.0674838	0.14984	0.22725	0.260381	0.347223	0.423261	0.496094	0.575567	0.704532	0.785738	0.917574	1.02272	1.21765	1.24513	1.42824	1.65203	1.93366	2.34007	2.77325	3.51511	6.77036	21.9308
0.0676673	0.150231	0.227295	0.260392	0.34769	0.423385	0.496094	0.577266	0.706622	0.786444	0.918438	1.02272	1.2183	1.24658	1.43093	1.65432	1.93565	2.34007	2.77325	3.52141	6.77036	22.065
0.0677405	0.150319	0.228087	0.260577	0.348775	0.423486	0.496094	0.577841	0.709286	0.786614	0.918596	1.02272	1.21849	1.2533	1.43674	1.655	1.93731	2.34007	2.77325	3.52394	6.81113	22.5286
0.0677877	0.150324	0.22812	0.261249	0.349258	0.423557	0.496094	0.578061	0.715762	0.787445	0.918741	1.02272	1.21905	1.25353	1.43791	1.65535	1.93731	2.34007	2.77325	3.5274	6.87855	22.9064
0.0678681	0.150339	0.228206	0.261282	0.349283	0.424428	0.496094	0.578323	0.716413	0.787618	0.918829	1.02272	1.22004	1.25754	1.4391	1.65949	1.93731	2.34007	2.77325	3.53235	6.89642	22.9091
0.067931	0.150371	0.22823	0.261523	0.349456	0.424457	0.496094	0.578722	0.717289	0.787776	0.919024	1.02272	1.22095	1.25788	1.43977	1.66228	1.93731	2.34007	2.77325	3.53432	6.90979	22.9185
0.067931	0.150416	0.228483	0.261612	0.349651	0.424716	0.496094	0.578822	0.717422	0.787848	0.920942	1.02272	1.22105	1.25811	1.43985	1.66243	1.93731	2.34007	2.77325	3.53636	6.98894	23.0577
0.067935	0.150463	0.22877	0.26164	0.349677	0.425215	0.496094	0.578834	0.717578	0.788236	0.921196	1.02272	1.2212	1.25858	1.44173	1.66269	1.93731	2.34007	2.77325	3.54088	7.10298	23.0697
0.0679659	0.150624	0.228889	0.261955	0.350108	0.425312	0.496094	0.579563	0.718406	0.790098	0.922153	1.02272	1.2223	1.25884	1.44522	1.66395	1.93731	2.34007	2.77325	3.54688	7.14185	23.1629
0.0679659	0.15082	0.229283	0.262019	0.350151	0.425641	0.496094	0.579593	0.718512	0.790438	0.924936	1.02272	1.2261	1.26149	1.44635	1.66395	1.94204	2.34007	2.77325	3.55149	7.14185	23.3283
0.0680057	0.150932	0.229293	0.262304	0.350624	0.425765	0.496094	0.580108	0.719613	0.790473	0.925873	1.02272	1.22615	1.26162	1.44635	1.66395	1.94362	2.34044	2.77325	3.55149	7.2445	23.4007
0.0680155	0.151632	0.22937	0.262664	0.350791	0.426429	0.496657	0.580244	0.71995	0.791964	0.926297	1.02272	1.22752	1.26199	1.44635	1.66395	1.94469	2.34831	2.77325	3.56211	7.25964	23.5135
0.0680571	0.151817	0.229468	0.262982	0.350791	0.426546	0.49681	0.580609	0.720121	0.792353	0.927991	1.02272	1.22833	1.26365	1.44635	1.66395	1.94818	2.35318	2.77325	3.56276	7.32894	23.8241
0.0682184	0.151919	0.229875	0.263079	0.350791	0.427253	0.497299	0.581662	0.72013	0.792822	0.928336	1.02272	1.22901	1.2648	1.44635	1.66395	1.94856	2.35318	2.77325	3.56882	7.3857	23.877
0.0683374	0.15205	0.230084	0.263505	0.350791	0.427415	0.497376	0.581773	0.72028	0.793309	0.92845	1.02272	1.23047	1.2648	1.44635	1.66708	1.94887	2.35593	2.7785	3.57369	7.43789	24.2275
0.068341	0.152073	0.230119	0.263659	0.350791	0.428303	0.497511	0.581822	0.720374	0.79442	0.929006	1.02272	1.23049	1.2648	1.44635	1.67016	1.96326	2.35916	2.78149	3.58106	7.44003	24.7463
0.0683855	0.152111	0.230126	0.263838	0.350791	0.428306	0.497838	0.581899	0.720603	0.795117	0.929474	1.02272	1.23095	1.2648	1.44635	1.6767	1.96418	2.36207	2.78403	3.58239	7.44141	24.8096
0.0684206	0.152429	0.230266	0.265007	0.350791	0.428466	0.498124	0.582029	0.720922	0.796245	0.93072	1.02293	1.2316	1.2648	1.44635	1.68043	1.96825	2.36346	2.78428	3.58324	7.44554	24.8468
0.0684237	0.152538	0.230572	0.265199	0.350791	0.428469	0.498263	0.582456	0.720936	0.79629	0.931036	1.0241	1.2328	1.2648	1.44635	1.68232	1.97306	2.36747	2.80709	3.58626	7.46205	25.0048
0.0684723	0.152577	0.230576	0.265239	0.350791	0.429581	0.498359	0.582505	0.721191	0.797643	0.931421	1.02416	1.23452	1.2648	1.44635	1.68882	1.98062	2.36987	2.80961	3.59341	7.53181	26.1628
0.0685405	0.15269	0.230667	0.265472	0.350791	0.429734	0.499101	0.58254	0.724788	0.798032	0.932897	1.02478	1.23466	1.2648	1.44635	1.6922	1.98331	2.37312	2.81088	3.61424	7.58191	26.2145
0.0686409	0.152806	0.230778	0.265475	0.350791	0.429865	0.499519	0.582597	0.724935	0.799095	0.934819	1.02569	1.23486	1.2648	1.44635	1.69659	1.98438	2.37836	2.8109	3.62531	7.59283	26.2156
0.0687006	0.152872	0.23124	0.265543	0.350791	0.430067	0.499648	0.582829	0.725142	0.799735	0.935177	1.02585	1.23677	1.2648	1.44635	1.69788	1.98438	2.37845	2.81446	3.626	7.6229	26.5908
0.0687036	0.152917	0.231451	0.265604	0.350791	0.430216	0.49986	0.583054	0.725215	0.799937	0.93596	1.02681	1.23899	1.2648	1.44635	1.69925	1.98438	2.37983	2.8172	3.62645	7.64483	27.0143
0.0688814	0.153203	0.231789	0.265774	0.350791	0.431237	0.499955	0.583144	0.726684	0.800883	0.939405	1.02701	1.24023	1.2648	1.44635	1.70211	1.98438	2.38296	2.82817	3.62678	7.70145	27.2005
0.0690374	0.153365	0.231806	0.265853	0.350791	0.4313	0.500122	0.583744	0.727761	0.802359	0.939778	1.02742	1.24023	1.2648	1.44635	1.70378	1.98438	2.3849	2.82817	3.62991	7.88305	27.3133
0.0691612	0.153596	0.232387	0.265959	0.350791	0.431899	0.500619	0.584919	0.727988	0.802562	0.939802	1.034	1.24023	1.2648	1.44635	1.70645	1.98438	2.38575	2.82817	3.63295	7.94137	27.4426
0.0692582	0.153819	0.232898	0.266032	0.350791	0.432544	0.500956	0.585074	0.728096	0.803238	0.939962	1.03706	1.24023	1.2648	1.44635	1.70669	1.98438	2.38834	2.83611	3.64497	7.94137	27.927
0.0692955	0.154266	0.232963	0.266059	0.350791	0.432623	0.50115	0.585913	0.728698	0.804936	0.941251	1.03743	1.24023	1.2648	1.44635	1.70744	1.98438	2.39258	2.83663	3.64645	7.94137	28.4649
0.0693038	0.154353	0.23319	0.266265	0.350791	0.432761	0.501649	0.586509	0.728908	0.805193	0.945582	1.0379	1.24023	1.2648	1.44635	1.7088	1.98438	2.39307	2.83666	3.66503	7.94137	28.7103
0.0693405	0.154448	0.233193	0.266353	0.350791	0.433471	0.50195	0.586939	0.729045	0.805481	0.946752	1.0382	1.24023	1.2648	1.44635	1.70891	1.98438	2.39407	2.85851	3.66689	7.94137	28.9493
0.069376	0.154457	0.233425	0.266366	0.350791	0.434014	0.502795	0.58831	0.729961	0.80551	0.947153	1.0405	1.24023	1.2648	1.44635	1.70938	1.98438	2.39502	2.85876	3.67328	7.94137	29.4341
0.0694422	0.154493	0.233619	0.266482	0.350791	0.434373	0.503126	0.589729	0.730061	0.806394	0.948075	1.04209	1.24023	1.2648	1.44635	1.71142	1.98438	2.39631	2.86155	3.67468	7.94137	29.6673
0.0694621	0.154543	0.234076	0.266723	0.350791	0.434593	0.503412	0.590698	0.730451	0.807399	0.948184	1.04253	1.24023	1.2648	1.44635	1.72557	1.98438	2.39808	2.87443	3.68748	7.94137	29.8688
0.0695059	0.154688	0.234169	0.266907	0.350791	0.434794	0.503645	0.592731	0.73053	0.807517	0.948606	1.0426	1.24023	1.2648	1.44635	1.72653	1.98438	2.39914	2.8836	3.68748	8.00219	29.9141
0.0695085	0.154708	0.234232	0.266927	0.350791	0.434942	0.504181	0.593195	0.731142	0.807765	0.949628	1.04574	1.24023	1.2648	1.44635	1.72746	1.98438	2.40118	2.89018	3.68748	8.07582	30.0229
0.0695263	0.154828	0.23429	0.267075	0.350791	0.435132	0.504355	0.59351	0.733137	0.809575	0.94991	1.04577	1.24023	1.2648	1.45215	1.73046	1.98438	2.40263	2.89032	3.68748	8.08961	30.1864
0.0697048	0.155011	0.234558	0.26717	0.350791	0.435284	0.504525	0.59351	0.734238	0.809655	0.950435	1.04634	1.24023	1.26539	1.45265	1.73095	1.98438	2.41189	2.8927	3.68748	8.14116	30.3074
0.0697124	0.155036	0.234962	0.267404	0.350791	0.435735	0.504603	0.593519	0.735314	0.81015	0.950724	1.04672	1.24023	1.26675	1.45459	1.73498	1.98438	2.41422	2.8927	3.69351	8.20597	30.5188
0.0698622	0.155063	0.235434	0.267502	0.350791	0.436477	0.506226	0.596168	0.735907	0.810492	0.951079	1.05045	1.24023	1.26733	1.45522	1.73534	1.98438	2.41789	2.8927	3.70919	8.32889	30.6546
0.0699115	0.155117	0.235446	0.267543	0.350791	0.436837	0.506318	0.596348	0.736246	0.810926	0.951182	1.05096	1.24023	1.26771	1.45831	1.73633	1.98438	2.41816	2.8927	3.71525	8.33452	30.7948
0.0699128	0.155304	0.235635	0.267747	0.350791	0.437907	0.506594	0.596592	0.737221	0.811112	0.951921	1.05154	1.24023	1.26803	1.45975	1.73633	1.98438	2.43123	2.8927	3.73106	8.33625	30.8577
0.0699783	0.155334	0.235652	0.267838	0.350791	0.438064	0.506795	0.597657	0.737304	0.812608	0.952616	1.05237	1.24023	1.26853	1.45983	1.73633	1.98884	2.43677	2.89409	3.74888	8.33856	30.8627
0.0700842	0.155399	0.235751	0.267915	0.350791	0.438216	0.506817	0.598539	0.737705	0.81328	0.95272	1.05237	1.24023	1.26957	1.4607	1.73633	1.98977	2.4381	2.89469	3.78644	8.43724	30.9512
0.0701591	0.15548	0.235895	0.268197	0.350791	0.438319	0.508504	0.59873	0.738619	0.81422	0.953386	1.05237	1.24023	1.27006	1.46307	1.73633	1.99076	2.43833	2.89669	3.79439	8.4769	30.9592
0.0702158	0.155488	0.235903	0.268395	0.350791	0.438905	0.508524	0.598901	0.73897	0.814437	0.953538	1.05237	1.24023	1.2705	1.46584	1.73633	1.99273	2.44254	2.90055	3.79439	8.5243	31.0495
0.0702495	0.155547	0.235906	0.268769	0.350791	0.4394	0.508984	0.59986	0.73904	0.814575	0.956058	1.05237	1.24023	1.27272	1.46635	1.73633	1.99899	2.44298	2.90226	3.80888	8.55779	31.0802
0.070372	0.155997	0.236017	0.26877	0.350791	0.439573	0.509018	0.600691	0.739085	0.814711	0.95637	1.05237	1.24023	1.27412	1.47006	1.73633	1.99982	2.44298	2.90265	3.81596	8.76978	31.1049
0.0705034	0.156027	0.236346	0.269039	0.350791	0.439632	0.509259	0.600984	0.739444	0.816132	0.958378	1.05237	1.24023	1.27518	1.47226	1.73633	1.99982	2.44298	2.90331	3.81801	8.9469	31.1997
0.070523	0.156078	0.236625	0.269144	0.350791	0.439796	0.509393	0.601367	0.739933	0.816407	0.960148	1.05237	1.24023	1.27839	1.47242	1.73633	1.99982	2.44298	2.90331	3.84047	9.09693	31.2578
0.0705893	0.156138	0.236724	0.269304	0.350791	0.440747	0.509399	0.602725	0.740142	0.817059	0.960377	1.05237	1.24023	1.27906	1.47821	1.73633	1.99982	2.44361	2.90518	3.85072	9.12732	31.2588
0.0706491	0.156146	0.236961	0.269751	0.350791	0.441268	0.510145	0.602852	0.741428	0.820672	0.962053	1.05237	1.24023	1.28031	1.47992	1.73633	1.99982	2.4446	2.90531	3.85072	9.33724	31.3021
0.0706795	0.156164	0.236973	0.270725	0.350791	0.441436	0.510906	0.603018	0.741614	0.821305	0.962503	1.05274	1.24023	1.28118	1.48302	1.73633	1.99982	2.44735	2.90696	3.86318	9.6324	31.3728
0.0707178	0.15642	0.237016	0.270805	0.350791	0.442212	0.511043	0.60409	0.741928	0.821659	0.962562	1.05329	1.24023	1.2812	1.48526	1.73633	1.99982	2.45347	2.91935	3.87462	9.77506	31.8467
0.0707939	0.156477	0.237029	0.270841	0.351397	0.44235	0.511158	0.604396	0.742681	0.822444	0.962645	1.05433	1.24023	1.28152	1.48569	1.73633	1.99982	2.45495	2.92455	3.87462	9.92188	32.3233
0.0708547	0.156679	0.237042	0.270907	0.351423	0.443711	0.511165	0.604499	0.743198	0.822745	0.963041	1.055	1.24023	1.28164	1.4862	1.74107	1.99982	2.46356	2.92762	3.87462	9.92188	32.8023
0.0708774	0.156679	0.237271	0.270922	0.351602	0.443772	0.511465	0.604795	0.743699	0.823114	0.963155	1.05655	1.24023	1.28195	1.48828	1.74122	1.99982	2.46944	2.93098	3.87462	10.0451	33.1994
0.0709627	0.156786	0.237856	0.270944	0.351906	0.443796	0.511512	0.605875	0.744072	0.82408	0.965611	1.05793	1.24023	1.28405	1.48828	1.74277	1.99982	2.47191	2.93576	3.87462	10.3617	33.5194
0.0709763	0.156865	0.238237	0.271241	0.352618	0.443881	0.511937	0.605914	0.744141	0.825216	0.966107	1.05922	1.24023	1.28467	1.48828	1.74309	2.00043	2.47434	2.94093	3.88584	10.4327	33.9906
0.0709957	0.156873	0.238282	0.271355	0.352852	0.444473	0.512421	0.606079	0.744141	0.828783	0.966593	1.06004	1.24023	1.28589	1.48828	1.74612	2.00169	2.47584	2.94103	3.92197	10.468	34.2314
0.0710352	0.156937	0.238393	0.27206	0.352986	0.444549	0.512696	0.6062	0.744141	0.829087	0.967234	1.06036	1.24023	1.28649	1.48828	1.74986	2.00266	2.47644	2.94129	3.92197	10.5966	34.2781
0.0710387	0.157019	0.238909	0.272222	0.353819	0.444737	0.513508	0.606538	0.744141	0.830521	0.96778	1.06113	1.24023	1.28788	1.48828	1.75081	2.00794	2.48047	2.94244	3.92197	10.5966	34.4285
0.0710493	0.157075	0.238911	0.27251	0.353943	0.444842	0.513795	0.607349	0.744141	0.83077	0.967822	1.06216	1.24023	1.29135	1.48828	1.75396	2.01221	2.48047	2.94681	3.93154	10.5966	34.4285
0.0710822	0.157111	0.238951	0.272616	0.354146	0.445596	0.514442	0.607774	0.744141	0.831748	0.968112	1.06525	1.24023	1.29289	1.48828	1.75396	2.01893	2.48047	2.94705	3.99964	10.7321	34.4598
0.0711822	0.157164	0.239528	0.272661	0.354229	0.44561	0.515081	0.609337	0.744141	0.832021	0.968152	1.06599	1.24023	1.29745	1.48828	1.75396	2.02084	2.48047	2.94906	3.99964	10.8292	34.7407
0.0711904	0.157374	0.240409	0.272742	0.355468	0.446035	0.515405	0.609508	0.744141	0.832361	0.968799	1.06614	1.24023	1.2981	1.48828	1.75396	2.02391	2.48047	2.9524	3.99964	11.1483	35.2541
0.0712647	0.158063	0.240426	0.272888	0.355651	0.446092	0.515733	0.609897	0.744141	0.835064	0.969472	1.06676	1.24023	1.29842	1.48828	1.75396	2.02476	2.48047	2.95315	4.00732	11.2963	35.4186
0.0713075	0.158099	0.240433	0.273179	0.355796	0.44628	0.516033	0.610577	0.744141	0.835538	0.969576	1.06694	1.24023	1.29931	1.48828	1.75396	2.02722	2.48047	2.96523	4.00732	11.3805	35.4577
0.0713265	0.158132	0.240481	0.273219	0.356068	0.446874	0.516492	0.611394	0.744141	0.836071	0.970047	1.06798	1.24023	1.30063	1.49041	1.75396	2.03272	2.48047	2.96694	4.00732	11.4209	35.4785
0.0713265	0.158188	0.240548	0.27356	0.356705	0.4472	0.516527	0.611669	0.744141	0.838333	0.970947	1.06971	1.24023	1.3023	1.49049	1.75396	2.03687	2.48047	2.97147	4.03791	11.4908	35.5262
0.0714108	0.158216	0.240671	0.273997	0.357232	0.448264	0.516968	0.611899	0.744141	0.838472	0.971089	1.07089	1.24023	1.30922	1.4916	1.75396	2.04298	2.48047	2.9783	4.03842	11.5308	35.5409
0.0714174	0.158267	0.240755	0.274022	0.357353	0.448799	0.517557	0.612059	0.744141	0.83877	0.972967	1.07179	1.24023	1.31245	1.49736	1.75396	2.04545	2.48047	2.97968	4.06556	11.6133	35.7265
0.0714224	0.158471	0.240906	0.274221	0.357938	0.44953	0.518331	0.612273	0.744141	0.839109	0.973413	1.07264	1.24023	1.31422	1.4977	1.75396	2.04545	2.48047	2.98108	4.06827	11.6767	35.7609
0.0714484	0.158485	0.241166	0.2744	0.358149	0.449984	0.518529	0.612764	0.744141	0.840218	0.974534	1.07292	1.24023	1.3143	1.49945	1.75396	2.04545	2.48047	2.98327	4.06827	11.7659	36.0701
0.0714685	0.158827	0.24135	0.274652	0.35843	0.450027	0.519266	0.613727	0.744141	0.842424	0.974969	1.07306	1.24023	1.31471	1.5001	1.75396	2.04545	2.48047	2.98616	4.06827	11.7659	36.2878
0.0714828	0.159048	0.241575	0.275052	0.358464	0.450615	0.519784	0.614861	0.744141	0.8428	0.976108	1.0733	1.24023	1.31527	1.50424	1.75396	2.04545	2.48047	2.98634	4.06827	11.8467	36.3581
0.071488	0.159051	0.241656	0.275322	0.3586	0.450713	0.519817	0.615294	0.744141	0.843205	0.976186	1.07359	1.24023	1.31608	1.50485	1.75396	2.05091	2.48047	2.98688	4.06827	12.0015	36.4181
0.0716804	0.159196	0.24175	0.275423	0.358712	0.451411	0.519838	0.615491	0.744141	0.84484	0.976504	1.07505	1.24023	1.31702	1.50781	1.75396	2.05688	2.48047	2.98688	4.06827	12.0807	36.7009
0.0717526	0.159304	0.241762	0.275519	0.359282	0.452053	0.519937	0.615621	0.744141	0.846421	0.978571	1.07556	1.24023	1.31832	1.50814	1.75396	2.05853	2.48047	2.99607	4.06827	12.1644	36.8523
0.071828	0.159495	0.241948	0.275622	0.359652	0.452156	0.520874	0.616055	0.744141	0.847026	0.978964	1.07675	1.24023	1.31958	1.50862	1.75396	2.06223	2.48047	2.99702	4.07067	12.2375	36.9065
0.0718614	0.159538	0.242052	0.275683	0.359869	0.45216	0.522143	0.616438	0.744141	0.847296	0.979992	1.07793	1.24023	1.32315	1.50881	1.75396	2.06756	2.48047	2.99716	4.10591	12.2375	37.1218
0.0719528	0.159636	0.242288	0.275702	0.360306	0.453282	0.522548	0.617175	0.744141	0.847303	0.981794	1.07941	1.24023	1.32359	1.50881	1.75396	2.06893	2.48047	2.99716	4.10591	12.2375	37.1657
0.0720387	0.159709	0.24238	0.276167	0.360492	0.453794	0.522568	0.617437	0.744141	0.84743	0.981795	1.07959	1.24023	1.32365	1.50881	1.75396	2.07158	2.48047	2.99964	4.17142	12.4741	37.1839
0.0720782	0.159773	0.242525	0.276457	0.360688	0.453831	0.522707	0.617564	0.744141	0.847516	0.982902	1.08007	1.24023	1.32402	1.50881	1.75396	2.07432	2.48047	3.00868	4.20229	12.4741	37.4559
0.0720929	0.159929	0.242641	0.276551	0.361062	0.454145	0.522928	0.617597	0.744141	0.847694	0.983407	1.08014	1.24023	1.32512	1.50881	1.75396	2.07907	2.48047	3.01587	4.2095	12.6771	37.6157
0.0721337	0.15994	0.242673	0.276867	0.361425	0.454309	0.523768	0.618422	0.744141	0.848304	0.98374	1.08456	1.24023	1.33085	1.50881	1.75396	2.07988	2.48047	3.01762	4.2168	12.7497	37.7504
0.072169	0.159958	0.24287	0.27689	0.361539	0.454321	0.523874	0.618539	0.744141	0.848476	0.984163	1.08517	1.24023	1.33134	1.50881	1.75396	2.08129	2.48047	3.01964	4.2168	12.7858	38.1097
0.0722294	0.159982	0.243343	0.277359	0.361973	0.454423	0.524063	0.622096	0.744141	0.84934	0.985423	1.08779	1.24023	1.33242	1.50881	1.75396	2.09409	2.48047	3.02219	4.2168	12.7858	38.1678
0.0722785	0.160176	0.243351	0.277719	0.362001	0.455484	0.525111	0.622265	0.744141	0.850367	0.986668	1.08853	1.24023	1.33268	1.50881	1.75396	2.09561	2.48313	3.02574	4.22409	12.865	38.3712
0.0723329	0.160295	0.243382	0.27773	0.363171	0.455502	0.525139	0.623287	0.744141	0.853272	0.98704	1.09915	1.24023	1.33361	1.50881	1.75396	2.09966	2.48359	3.0278	4.22409	12.9959	38.6062
0.0723354	0.160433	0.243455	0.277892	0.363249	0.455632	0.525337	0.623684	0.744141	0.854903	0.987107	1.10007	1.24023	1.33577	1.51174	1.75396	2.10507	2.48553	3.0278	4.23557	13.0219	38.7152
0.0723366	0.160548	0.243548	0.277934	0.363268	0.455941	0.525476	0.624567	0.744141	0.854916	0.988536	1.10111	1.24023	1.33577	1.51178	1.75396	2.11219	2.49084	3.0278	4.25631	13.0902	38.8453
0.0723728	0.160554	0.243674	0.278046	0.363567	0.456025	0.526453	0.624694	0.744141	0.855892	0.98949	1.10165	1.24023	1.33577	1.51196	1.75396	2.11332	2.49284	3.0278	4.26896	13.1815	38.9062
0.0724396	0.160781	0.243795	0.278098	0.363782	0.456073	0.527305	0.625382	0.744141	0.856553	0.992188	1.10639	1.24023	1.33577	1.51247	1.75396	2.11658	2.49284	3.0278	4.27479	13.4152	38.937
0.0724946	0.160932	0.243829	0.278165	0.364102	0.45698	0.527679	0.625408	0.744141	0.856991	0.992188	1.10654	1.24023	1.33577	1.51269	1.75396	2.11682	2.49284	3.03393	4.27715	13.477	38.956
0.0724969	0.160959	0.243837	0.278364	0.364325	0.457272	0.527976	0.625601	0.744141	0.857418	0.992188	1.10757	1.24023	1.33577	1.51559	1.75396	2.11931	2.49937	3.05626	4.32355	13.5702	39.3676
0.0726443	0.16107	0.244173	0.278436	0.364521	0.457326	0.52835	0.625914	0.744141	0.857748	0.992188	1.1084	1.24023	1.33577	1.51651	1.75396	2.12185	2.49968	3.06817	4.33195	13.5702	40.0348
0.0726918	0.161091	0.244564	0.278533	0.364523	0.457819	0.528569	0.625996	0.744141	0.858039	0.992188	1.10885	1.24023	1.33577	1.51792	1.75396	2.12782	2.50083	3.07067	4.33195	13.6516	40.1415
0.0727156	0.161126	0.244582	0.278812	0.364715	0.458664	0.528653	0.62692	0.744141	0.858536	0.992188	1.1093	1.24023	1.33577	1.51963	1.75396	2.13378	2.50288	3.08962	4.33458	13.6516	40.1576
0.0727527	0.161205	0.244762	0.278853	0.364831	0.458861	0.529179	0.627034	0.744141	0.858994	0.992188	1.1093	1.24023	1.33577	1.5215	1.75396	2.13378	2.5066	3.11477	4.33905	13.6629	40.2081
0.0728309	0.161212	0.245122	0.278873	0.364897	0.459435	0.529192	0.627645	0.744141	0.859345	0.992188	1.1093	1.24023	1.33577	1.52366	1.75396	2.13378	2.50695	3.12337	4.34055	13.7325	40.2111
0.0728491	0.161261	0.245341	0.279808	0.365135	0.459462	0.530152	0.62803	0.744141	0.859718	0.992188	1.1093	1.24023	1.33577	1.52373	1.75396	2.13378	2.511	3.13953	4.40941	13.7839	40.2456
0.0729532	0.16138	0.245385	0.279815	0.365205	0.459617	0.530277	0.628354	0.744141	0.859924	0.992188	1.1093	1.24023	1.33577	1.52422	1.75396	2.13378	2.51145	3.15374	4.41465	13.7839	40.2937
0.0730174	0.161436	0.245424	0.280905	0.365487	0.459778	0.5305	0.630489	0.744141	0.86009	0.992188	1.1093	1.24023	1.33577	1.5258	1.75396	2.13378	2.51271	3.15712	4.41533	13.8062	40.3555
0.0730641	0.161746	0.245881	0.28128	0.365691	0.459975	0.530807	0.63305	0.744141	0.860435	0.992188	1.1093	1.24023	1.33577	1.53155	1.75396	2.13378	2.52336	3.16	4.43431	13.8196	40.5805
0.0731843	0.161834	0.246049	0.281323	0.365994	0.460232	0.530949	0.633051	0.744141	0.86153	0.992188	1.1093	1.24023	1.33577	1.54127	1.75396	2.13378	2.52585	3.16123	4.47173	13.8307	40.796
0.0732	0.161911	0.246085	0.281555	0.366593	0.461448	0.531142	0.634035	0.744141	0.862653	0.992188	1.1093	1.24023	1.33577	1.54374	1.75396	2.13378	2.52959	3.16379	4.47173	13.884	40.924
0.0732459	0.161981	0.246157	0.28179	0.366643	0.461555	0.531677	0.634378	0.744141	0.86291	0.992188	1.1093	1.24023	1.33577	1.5458	1.75683	2.13378	2.52959	3.16795	4.47173	13.9105	41.0028
0.0733318	0.162025	0.246289	0.281809	0.366933	0.461779	0.531681	0.637162	0.744141	0.863459	0.992188	1.1093	1.24023	1.33577	1.54697	1.75903	2.13378	2.52959	3.16895	4.47173	13.9657	41.6135
0.0733386	0.16203	0.246399	0.281973	0.367116	0.462035	0.531841	0.637671	0.744141	0.864109	0.992188	1.1093	1.24023	1.33577	1.54925	1.75976	2.13378	2.53851	3.17336	4.47173	13.9701	41.6903
0.0733582	0.162097	0.246596	0.282002	0.367477	0.462076	0.531995	0.638985	0.744141	0.865837	0.992188	1.1093	1.24023	1.33577	1.54941	1.76153	2.13378	2.54169	3.17383	4.47173	14.0185	41.6984
0.0735647	0.162294	0.246623	0.282326	0.368102	0.462274	0.53222	0.639154	0.744141	0.866075	0.992188	1.1093	1.24023	1.33577	1.55472	1.76806	2.13378	2.55275	3.17655	4.47173	14.1038	41.7965
0.073568	0.162317	0.246801	0.282331	0.368794	0.462382	0.532623	0.63928	0.744141	0.866218	0.992188	1.1093	1.24023	1.33577	1.55523	1.77386	2.13378	2.5538	3.17655	4.53942	14.1995	42.0108
0.0735873	0.162324	0.246813	0.282353	0.368966	0.462584	0.533056	0.640443	0.744141	0.866876	0.992188	1.1093	1.24023	1.33577	1.55568	1.7771	2.13378	2.5538	3.17655	4.54925	14.2514	42.0869
0.0736161	0.162481	0.247264	0.282387	0.369042	0.462739	0.533421	0.641925	0.744141	0.8671	0.992188	1.1093	1.24023	1.33577	1.55863	1.77808	2.13768	2.5538	3.17657	4.57376	14.2837	42.157
0.0736221	0.162723	0.247417	0.282402	0.369108	0.462823	0.53379	0.643008	0.744141	0.867583	0.992188	1.1093	1.24023	1.33577	1.56151	1.78262	2.13817	2.5538	3.17809	4.62304	14.3546	42.4363
0.0736942	0.163048	0.247497	0.282488	0.369606	0.463245	0.534641	0.644469	0.744141	0.868091	0.992188	1.11199	1.24023	1.33577	1.56449	1.78642	2.14084	2.5538	3.18028	4.68014	14.4465	42.8949
0.073713	0.163059	0.247678	0.282796	0.369665	0.463487	0.534685	0.64475	0.744141	0.868536	0.992188	1.11249	1.24023	1.33577	1.56508	1.78658	2.14121	2.5538	3.18534	4.70636	14.5526	43.0259
0.0737148	0.163385	0.247695	0.282894	0.369741	0.464869	0.535576	0.645599	0.744141	0.869117	0.992188	1.11374	1.24023	1.33577	1.56718	1.78673	2.14347	2.5538	3.18683	4.72706	14.5673	43.1701
0.0737723	0.163573	0.247869	0.283081	0.370588	0.465193	0.535793	0.646117	0.744141	0.869475	0.992188	1.11457	1.24023	1.33577	1.56879	1.78834	2.1466	2.5538	3.1967	4.73893	14.6851	43.21
0.0737727	0.163593	0.248006	0.283141	0.370735	0.465814	0.536142	0.64696	0.744141	0.869806	0.992188	1.11507	1.24023	1.33677	1.56879	1.78869	2.14969	2.5538	3.20298	4.80164	14.7374	43.2556
0.0737767	0.16362	0.248047	0.28319	0.371851	0.466713	0.536682	0.647514	0.744141	0.869925	0.992188	1.11602	1.24023	1.33732	1.56879	1.78869	2.15038	2.5538	3.20477	4.8162	14.8911	43.2627
0.0738124	0.163704	0.248047	0.283209	0.372151	0.467381	0.537047	0.647668	0.744141	0.87091	0.992188	1.11766	1.24023	1.338	1.56879	1.78869	2.15608	2.55899	3.22111	4.8162	15.0881	43.5356
0.0738434	0.163849	0.248047	0.283233	0.372434	0.467385	0.537306	0.648345	0.744141	0.87101	0.992188	1.11879	1.24023	1.33863	1.56954	1.78869	2.15721	2.56164	3.22126	4.87186	15.1064	43.5695
0.0739468	0.16394	0.248047	0.283516	0.372549	0.467515	0.537363	0.648463	0.744141	0.871915	0.992188	1.11916	1.24023	1.34133	1.57111	1.78986	2.15953	2.56377	3.22461	4.89225	15.1491	43.6464
0.0740017	0.164082	0.248047	0.283739	0.372723	0.467682	0.53758	0.648968	0.744141	0.873058	0.992188	1.1202	1.24023	1.34214	1.57538	1.79079	2.16142	2.56382	3.22461	4.89225	15.2302	44.1503
0.0740332	0.164776	0.248047	0.283868	0.372877	0.468107	0.537915	0.64924	0.744141	0.873727	0.992188	1.12098	1.24023	1.34363	1.57695	1.79127	2.16639	2.57763	3.22461	4.89225	15.2604	44.2526
0.074054	0.164838	0.248047	0.283936	0.373667	0.468163	0.538134	0.649417	0.744141	0.874005	0.992188	1.12134	1.24023	1.35062	1.57862	1.79212	2.16846	2.57867	3.22461	4.89225	15.2765	44.4841
0.0740645	0.164856	0.248047	0.284424	0.373999	0.468309	0.538359	0.649662	0.744141	0.874266	0.992188	1.12267	1.24023	1.35277	1.57875	1.79662	2.17706	2.57961	3.22544	4.90907	15.3409	45.2405
0.0741047	0.165129	0.248047	0.284444	0.374088	0.468519	0.53896	0.650613	0.744141	0.875216	0.992188	1.1229	1.24023	1.35286	1.58199	1.7988	2.17885	2.58969	3.23257	4.92359	15.4209	45.3573
0.0741262	0.165179	0.248047	0.284487	0.374438	0.468602	0.539326	0.651057	0.744363	0.87612	0.992188	1.12296	1.24023	1.35415	1.58248	1.79916	2.18278	2.58969	3.23414	4.9319	15.6112	45.708
0.0741384	0.165327	0.248047	0.284761	0.374461	0.468775	0.539388	0.651374	0.744846	0.877602	0.992188	1.1241	1.24023	1.3614	1.58827	1.80409	2.18381	2.58969	3.23661	4.95322	15.8304	45.9557
0.0742615	0.165477	0.248047	0.284767	0.374738	0.468907	0.53948	0.651505	0.746872	0.877758	0.992188	1.12507	1.24023	1.36231	1.58827	1.8047	2.18568	2.58969	3.23793	4.99025	15.8769	46.5192
0.0742987	0.165503	0.248047	0.284998	0.374791	0.46937	0.539506	0.65169	0.747998	0.878831	0.992188	1.12569	1.24023	1.36594	1.58827	1.80538	2.18642	2.58969	3.2447	5.01644	15.8924	46.5357
0.0744027	0.165516	0.248047	0.285294	0.374989	0.469511	0.540412	0.652155	0.748208	0.879822	0.992188	1.12629	1.24023	1.3681	1.58827	1.80581	2.18899	2.5952	3.24579	5.01644	15.9755	46.934
0.0744142	0.165589	0.248047	0.285329	0.375163	0.469774	0.540529	0.65244	0.748595	0.880865	0.992188	1.12905	1.24023	1.36882	1.58827	1.80581	2.19001	2.60385	3.24587	5.01644	15.9985	47.0407
0.0744837	0.165658	0.248047	0.285788	0.376186	0.470424	0.540678	0.65278	0.749282	0.881564	0.992188	1.12936	1.24023	1.36885	1.58827	1.80581	2.19085	2.6078	3.24699	5.01644	16.0082	47.6069
0.0745093	0.165713	0.248047	0.285962	0.376587	0.47054	0.541031	0.653018	0.750663	0.882627	0.992188	1.13036	1.24023	1.37284	1.58827	1.80581	2.19485	2.61921	3.25272	5.11362	16.0848	47.7901
0.0745897	0.165725	0.248047	0.286756	0.376835	0.470673	0.541425	0.654662	0.750693	0.883062	0.992188	1.13088	1.24023	1.37324	1.58827	1.80581	2.21275	2.62348	3.25563	5.18006	16.123	47.8338
0.0746507	0.165743	0.248047	0.286759	0.376973	0.470751	0.541904	0.654665	0.753352	0.883065	0.992188	1.13189	1.24023	1.37521	1.58827	1.8094	2.21423	2.62706	3.25971	5.20898	16.123	48.0219
0.0748396	0.165879	0.248047	0.286816	0.377273	0.471111	0.542657	0.654703	0.753991	0.88331	0.992188	1.13347	1.24023	1.37846	1.58827	1.80975	2.21584	2.6331	3.26255	5.26187	16.1402	48.0392
0.0748633	0.16596	0.248047	0.287163	0.377348	0.471379	0.542874	0.655215	0.755576	0.88383	0.992188	1.13375	1.24023	1.3807	1.58827	1.81135	2.2186	2.63382	3.2756	5.27355	16.1516	48.4098
0.0749136	0.165968	0.248047	0.287537	0.377404	0.472531	0.543114	0.655295	0.755832	0.88427	0.992188	1.13412	1.24023	1.38108	1.58827	1.81486	2.2186	2.63482	3.27615	5.3546	16.1973	48.4714
0.0749927	0.166011	0.248047	0.287676	0.377494	0.472984	0.543221	0.655302	0.756388	0.884804	0.992188	1.13421	1.24023	1.3819	1.58827	1.81862	2.2186	2.63677	3.29409	5.43187	16.2769	48.5627
0.0749927	0.166199	0.248047	0.28782	0.377686	0.472996	0.543397	0.656906	0.756771	0.885101	0.992188	1.13479	1.24023	1.38213	1.58827	1.82301	2.2186	2.63677	3.30181	5.45703	16.3222	48.8199
0.0751285	0.166262	0.248047	0.287867	0.37789	0.473352	0.54345	0.657205	0.757638	0.885644	0.992188	1.13652	1.24023	1.38404	1.58827	1.82421	2.2186	2.63806	3.30693	5.5465	16.388	49.352
0.075137	0.166411	0.248047	0.28792	0.377906	0.473466	0.545169	0.657663	0.758406	0.886193	0.992188	1.13707	1.24023	1.38447	1.58827	1.82799	2.2186	2.63901	3.30936	5.5465	16.418	49.4137
0.0751849	0.16644	0.248047	0.287925	0.378025	0.473983	0.545516	0.658939	0.758823	0.886372	0.992188	1.13745	1.24023	1.38452	1.58827	1.83205	2.21932	2.64612	3.31148	5.5465	16.4423	49.4808
0.0753398	0.166471	0.248047	0.28798	0.378189	0.475181	0.545651	0.659413	0.759159	0.888011	0.992188	1.13875	1.24023	1.38483	1.58827	1.83386	2.22142	2.65178	3.31212	5.5465	16.4629	49.5622
0.0753696	0.166491	0.248047	0.288149	0.378204	0.475359	0.546561	0.660518	0.760321	0.888259	0.992188	1.13984	1.24023	1.38491	1.58827	1.83754	2.22657	2.66778	3.3279	5.5465	16.4704	49.6317
0.0753729	0.16654	0.248047	0.288158	0.378274	0.475757	0.547095	0.66259	0.760417	0.889254	0.992188	1.1408	1.24023	1.38803	1.58827	1.8438	2.22925	2.67082	3.32934	5.5465	16.5226	49.8154
0.075494	0.166751	0.248047	0.288306	0.378694	0.475874	0.547324	0.662721	0.760527	0.890701	0.992188	1.14261	1.24023	1.38855	1.58827	1.8492	2.2296	2.67155	3.33138	5.57366	16.621	50.2367
0.0754944	0.166968	0.248047	0.288847	0.3787	0.476082	0.54735	0.662797	0.761348	0.891143	0.992188	1.14308	1.24023	1.38879	1.58827	1.85031	2.23242	2.67155	3.33518	5.59619	16.669	50.8647
0.0755017	0.167002	0.248047	0.289129	0.378796	0.476274	0.547494	0.663728	0.761696	0.891541	0.992188	1.14431	1.24023	1.38891	1.58827	1.85598	2.23242	2.67155	3.33589	5.65217	16.7078	50.9004
0.0755079	0.16733	0.248047	0.289263	0.378953	0.476417	0.547551	0.664109	0.761727	0.892047	0.992188	1.14509	1.24023	1.38974	1.58827	1.85795	2.23242	2.67155	3.33713	5.65622	16.7078	50.9077
0.0755893	0.167331	0.248047	0.289346	0.379395	0.476509	0.548061	0.664519	0.761763	0.892317	0.992188	1.14534	1.24023	1.39029	1.58827	1.86193	2.23242	2.67155	3.33713	5.65634	16.8416	51.2473
0.0756053	0.167394	0.248047	0.289368	0.379555	0.476606	0.548615	0.665181	0.762327	0.892671	0.992188	1.14574	1.24023	1.39377	1.58827	1.86614	2.23242	2.67155	3.33713	5.66415	16.869	51.3175
0.0756053	0.167414	0.248047	0.289487	0.379719	0.476909	0.548681	0.665276	0.763197	0.8934	0.992188	1.14632	1.24023	1.39429	1.58827	1.86708	2.23242	2.67155	3.3374	5.66721	16.9436	51.6903
0.0756053	0.16753	0.248047	0.289681	0.38052	0.477065	0.548691	0.66554	0.766268	0.893561	0.992188	1.14649	1.24023	1.39612	1.58827	1.87706	2.23242	2.67155	3.34062	5.69663	17.0161	51.7016
0.0756639	0.167665	0.248047	0.289865	0.380796	0.478088	0.549176	0.665963	0.768906	0.894125	0.992188	1.14671	1.24023	1.39829	1.58827	1.87935	2.23242	2.67155	3.34177	5.72661	17.036	51.8584
0.0757056	0.167752	0.248047	0.29003	0.380848	0.478235	0.549556	0.666573	0.770465	0.894346	0.992188	1.14935	1.24023	1.40215	1.58827	1.88026	2.23242	2.67155	3.34215	5.72661	17.1655	52.1589
0.0758075	0.167913	0.248047	0.290398	0.380996	0.478363	0.54957	0.666904	0.771386	0.894346	0.992949	1.15143	1.24023	1.4022	1.58827	1.88225	2.23769	2.67155	3.34345	5.72661	17.2459	52.2108
0.0758107	0.168063	0.248047	0.290403	0.38121	0.478535	0.549613	0.667014	0.771526	0.894346	0.992952	1.15163	1.24023	1.40317	1.59144	1.88585	2.24032	2.67155	3.34595	5.76942	17.2745	52.2814
0.0758492	0.168113	0.248047	0.290819	0.381222	0.478793	0.549776	0.667959	0.771537	0.894346	0.994248	1.15235	1.24023	1.40317	1.59235	1.88813	2.24616	2.67155	3.34733	5.81192	17.4164	52.3526
0.0759352	0.168136	0.248047	0.291607	0.381425	0.478874	0.54982	0.668368	0.772392	0.894346	0.994844	1.15348	1.24023	1.40317	1.59485	1.88907	2.24616	2.67155	3.35659	5.83833	17.4199	52.4952
0.0759997	0.168142	0.248047	0.291799	0.381754	0.478951	0.549938	0.668971	0.772631	0.894346	0.99527	1.15615	1.24023	1.40317	1.59547	1.90123	2.24616	2.67243	3.36002	5.87368	17.471	52.5543
0.0760987	0.168253	0.248047	0.291926	0.382124	0.478951	0.550094	0.669331	0.773105	0.894346	0.995614	1.15629	1.24023	1.40317	1.60058	1.90363	2.24936	2.68401	3.36414	5.89601	17.471	52.5813
0.0761734	0.168336	0.248047	0.292049	0.382437	0.479023	0.550497	0.670207	0.774347	0.894346	0.996012	1.15652	1.24023	1.40317	1.60312	1.90454	2.24989	2.68825	3.37052	5.99432	17.627	52.6911
0.0762001	0.168529	0.248047	0.292273	0.38259	0.479257	0.551151	0.671193	0.775696	0.894346	0.997162	1.15676	1.24023	1.4046	1.60367	1.90579	2.25748	2.69304	3.3738	6.00458	17.7852	52.7355
0.076243	0.168654	0.248047	0.292352	0.382729	0.479342	0.552032	0.671195	0.775952	0.894346	0.997507	1.1585	1.24023	1.40488	1.60493	1.90614	2.25924	2.70038	3.37475	6.04034	17.8214	52.8177
0.0762474	0.16888	0.248047	0.292504	0.383059	0.480084	0.55217	0.671334	0.776342	0.894346	0.99777	1.15861	1.24023	1.40521	1.60578	1.90746	2.25948	2.70909	3.38785	6.04034	17.9213	52.8474
0.0763212	0.168959	0.248047	0.292606	0.383081	0.480171	0.552375	0.672146	0.777194	0.894346	0.997886	1.15904	1.24023	1.40593	1.60615	1.90798	2.26158	2.71818	3.39196	6.04034	17.9693	52.8782
0.0763495	0.169026	0.248047	0.292619	0.383405	0.480189	0.552674	0.672471	0.777648	0.894346	0.998434	1.15949	1.24023	1.40713	1.6072	1.9081	2.2631	2.72852	3.39707	6.12631	17.9761	52.8811
0.0765261	0.169113	0.248047	0.293243	0.383406	0.480548	0.553288	0.67299	0.777696	0.894346	0.999768	1.15993	1.24023	1.40946	1.60842	1.90833	2.26317	2.7315	3.4064	6.13634	17.9761	52.9741
0.0765742	0.169239	0.248047	0.293318	0.383485	0.481594	0.554081	0.674396	0.777721	0.894346	1.00179	1.16027	1.24023	1.41066	1.61112	1.9113	2.26332	2.7325	3.40914	6.20117	18.0257	53.0113
0.0765836	0.169393	0.248047	0.293881	0.383552	0.482433	0.55465	0.674718	0.777891	0.894346	1.00201	1.16034	1.24023	1.41409	1.61276	1.91875	2.26949	2.736	3.41146	6.20117	18.1091	53.6063
0.0765868	0.169438	0.248047	0.293966	0.383879	0.482651	0.55465	0.675443	0.778204	0.894523	1.00293	1.16084	1.24023	1.41422	1.61824	1.92178	2.27223	2.73608	3.42101	6.22098	18.3018	54.0048
0.0768133	0.169447	0.248047	0.294154	0.383951	0.482718	0.55465	0.675626	0.778805	0.896296	1.00306	1.16402	1.24023	1.41465	1.62577	1.9249	2.2755	2.73905	3.4213	6.27514	18.4174	54.4083
0.0768499	0.169531	0.248047	0.294168	0.38407	0.482899	0.55465	0.675949	0.779913	0.898388	1.00418	1.16407	1.24023	1.41834	1.62981	1.92875	2.28085	2.74025	3.42234	6.35794	18.5107	54.616
0.0769486	0.169569	0.248047	0.294956	0.384171	0.483145	0.55465	0.675974	0.779958	0.899655	1.00604	1.16557	1.24023	1.41853	1.63102	1.93731	2.28131	2.74034	3.42811	6.43967	18.5903	54.9131
0.0770085	0.16966	0.248047	0.295116	0.384916	0.483481	0.55465	0.676088	0.780092	0.899663	1.00625	1.16688	1.24023	1.41985	1.63233	1.93731	2.28688	2.75261	3.43198	6.43967	18.6448	55.1808
0.0770664	0.169991	0.248047	0.295424	0.384963	0.483864	0.55465	0.678247	0.780719	0.900531	1.00811	1.16814	1.24023	1.42297	1.63454	1.93731	2.28688	2.76221	3.43215	6.44922	18.6448	55.3945
0.0773816	0.170341	0.248047	0.295522	0.385026	0.485993	0.55465	0.678509	0.780935	0.900589	1.00828	1.16841	1.24023	1.4233	1.63544	1.93731	2.29067	2.76391	3.43975	6.50285	18.7206	55.8298
0.0774933	0.170369	0.248047	0.295651	0.385187	0.487423	0.55465	0.679797	0.781421	0.901771	1.00895	1.1686	1.24023	1.42481	1.63624	1.93731	2.29155	2.77325	3.44376	6.51094	18.7813	55.9515
0.0775289	0.170505	0.248047	0.295884	0.385298	0.487708	0.55465	0.680446	0.782631	0.904877	1.01305	1.17125	1.24023	1.42515	1.63683	1.93731	2.29287	2.77325	3.45004	6.51094	18.8532	56.1661
0.0775408	0.170663	0.248047	0.295944	0.385542	0.487816	0.55465	0.681809	0.7839	0.906027	1.01409	1.17276	1.24023	1.42603	1.63793	1.93805	2.29843	2.77325	3.45489	6.54863	19.0027	56.4294
0.0775409	0.170689	0.248047	0.29596	0.385747	0.488159	0.55465	0.68197	0.78395	0.90663	1.01602	1.1749	1.24023	1.42638	1.63793	1.94684	2.30251	2.77325	3.45489	6.56415	19.1832	56.8092
0.0777875	0.170741	0.248047	0.295964	0.385803	0.488194	0.55465	0.682198	0.784385	0.907013	1.0167	1.17616	1.24023	1.427	1.63979	1.94701	2.31138	2.77325	3.45489	6.59077	19.408	57.2263
0.0778239	0.170751	0.248047	0.296361	0.38587	0.488539	0.55465	0.683177	0.784393	0.907312	1.0169	1.17641	1.24077	1.42903	1.6414	1.95089	2.31509	2.77325	3.45972	6.59077	19.6255	58.5737
0.0778785	0.170806	0.248047	0.296999	0.38595	0.488982	0.55465	0.683737	0.784393	0.910053	1.01769	1.17751	1.24181	1.44143	1.64393	1.95212	2.31925	2.77325	3.49755	6.59077	19.6944	58.6173
0.0779054	0.170991	0.248047	0.297152	0.386009	0.48905	0.55465	0.683988	0.784393	0.910586	1.01885	1.17772	1.2427	1.44262	1.6443	1.9534	2.32242	2.77325	3.49801	6.59077	19.6959	59.1086
0.0780227	0.171564	0.248047	0.297241	0.386255	0.489412	0.55465	0.685627	0.784393	0.911347	1.02005	1.17918	1.24369	1.44326	1.64725	1.9562	2.32526	2.77325	3.50791	6.59077	19.8577	59.4744
0.0780392	0.171652	0.248047	0.297249	0.386416	0.489896	0.55465	0.68575	0.784393	0.911818	1.021	1.18075	1.24392	1.44535	1.64819	1.95786	2.32536	2.77325	3.50791	6.61872	19.8592	60.2733
0.0782092	0.171682	0.248047	0.297339	0.386726	0.490032	0.55465	0.686359	0.784393	0.912058	1.02272	1.18194	1.24509	1.44635	1.6526	1.97041	2.32709	2.77325	3.50791	6.6558	20.1896	60.3983
0.0782282	0.171764	0.248047	0.297669	0.387305	0.490112	0.55465	0.686597	0.784393	0.91385	1.02272	1.1824	1.24593	1.44635	1.65266	1.97658	2.32965	2.77325	3.50791	6.67887	20.522	60.6519
0.0782843	0.171921	0.248047	0.297709	0.387393	0.49186	0.55465	0.686728	0.784393	0.916265	1.02272	1.18315	1.24628	1.44635	1.65486	1.97888	2.33803	2.77325	3.50791	6.67887	20.5894	60.8934
0.0783186	0.17211	0.248047	0.297729	0.388002	0.492102	0.55465	0.68699	0.784393	0.918354	1.02272	1.18432	1.2464	1.44635	1.65749	1.9803	2.34007	2.77325	3.50791	6.67887	20.8787	61.1394
0.0783422	0.172372	0.248047	0.298108	0.388047	0.492167	0.55465	0.687104	0.784393	0.918551	1.02272	1.18596	1.24819	1.44635	1.65786	1.98295	2.34007	2.77325	3.50791	6.81113	21.2294	61.2877
0.0783502	0.172487	0.248047	0.298137	0.388318	0.492377	0.55465	0.687966	0.784393	0.919117	1.02272	1.18612	1.2554	1.44635	1.6634	1.98438	2.34007	2.77325	3.51131	6.89642	21.2815	61.7682
0.0784115	0.172507	0.248047	0.298288	0.388872	0.492666	0.55465	0.689651	0.784393	0.920876	1.02272	1.18791	1.25657	1.44635	1.66348	1.98438	2.34007	2.77325	3.5132	6.93032	21.5015	61.7791
0.0784155	0.172537	0.248047	0.298578	0.389214	0.492826	0.55465	0.689795	0.784393	0.920956	1.02272	1.18996	1.25756	1.44635	1.66395	1.98438	2.34007	2.77325	3.51728	6.97692	21.5387	61.9348
0.078455	0.172593	0.248047	0.298741	0.389225	0.4929	0.55465	0.691483	0.784393	0.921654	1.02272	1.19032	1.25794	1.44635	1.66395	1.98438	2.34007	2.77325	3.53655	7.02814	21.7745	62.6361
0.0784803	0.172711	0.248047	0.298792	0.389789	0.492932	0.55465	0.691722	0.784393	0.921918	1.02272	1.1911	1.26027	1.44635	1.66395	1.98438	2.34007	2.77325	3.54177	7.05518	21.8338	62.646
0.0784967	0.172843	0.248047	0.29888	0.390631	0.493006	0.55465	0.691806	0.784393	0.922994	1.02272	1.19183	1.26291	1.44635	1.66395	1.98438	2.34007	2.77325	3.54303	7.10298	21.8872	63.0098
0.0785202	0.172846	0.248047	0.29961	0.390869	0.493303	0.55465	0.691827	0.784393	0.924067	1.02272	1.19527	1.26309	1.44635	1.66395	1.98438	2.34007	2.77325	3.56361	7.14185	21.9252	63.1254
0.0785373	0.172902	0.248047	0.300049	0.391013	0.493335	0.55465	0.692341	0.784393	0.924276	1.02272	1.19771	1.26409	1.44635	1.66454	1.98438	2.34007	2.77325	3.56775	7.17181	21.942	63.1955
0.0785821	0.173019	0.248047	0.30014	0.391139	0.493554	0.55465	0.693556	0.784393	0.924412	1.02272	1.19788	1.2648	1.44635	1.66532	1.98438	2.34007	2.77325	3.57738	7.19309	22.1527	63.2398
0.0786169	0.173024	0.248047	0.300216	0.391252	0.493884	0.55465	0.694676	0.784393	0.926021	1.02272	1.19888	1.2648	1.44635	1.66656	1.98438	2.3408	2.77501	3.5991	7.23175	22.3091	63.5315
0.0786376	0.173088	0.248047	0.300289	0.39134	0.494209	0.55465	0.694829	0.784393	0.926061	1.02272	1.19892	1.2648	1.44635	1.66809	1.98438	2.35318	2.78974	3.61162	7.2445	22.478	64.7877
0.078731	0.173338	0.248047	0.300418	0.391838	0.494369	0.55465	0.69593	0.784393	0.927089	1.02272	1.20062	1.2648	1.44635	1.66905	1.98438	2.35318	2.79558	3.61312	7.29949	22.5518	66.6143
0.0787563	0.173355	0.248047	0.300803	0.391908	0.494646	0.55465	0.697397	0.785241	0.927797	1.02272	1.20097	1.2648	1.44635	1.66989	1.98438	2.35318	2.79567	3.61463	7.32474	22.5927	67.002
0.0788021	0.173477	0.248047	0.300978	0.392496	0.49475	0.55465	0.698345	0.785613	0.928202	1.02272	1.20103	1.2648	1.44635	1.67855	1.98438	2.35329	2.79902	3.61758	7.34533	22.6593	67.7786
0.0788403	0.173534	0.248047	0.301011	0.392748	0.494821	0.55465	0.698581	0.786173	0.929005	1.02272	1.20131	1.2648	1.44635	1.68093	1.98438	2.35495	2.80011	3.62037	7.37419	22.7609	68.235
0.0788759	0.173701	0.248047	0.301254	0.392753	0.495267	0.55465	0.699204	0.786448	0.929138	1.02272	1.20144	1.2648	1.44635	1.6828	1.98438	2.35721	2.8017	3.62145	7.39066	23.111	70.2411
0.0789183	0.17371	0.248047	0.301364	0.392829	0.495759	0.55465	0.699361	0.787192	0.929323	1.02272	1.20164	1.2648	1.44635	1.68763	1.98438	2.3577	2.80596	3.62416	7.44022	23.1429	71.7486
0.0789261	0.173784	0.248047	0.301515	0.393478	0.496094	0.55465	0.700552	0.787776	0.930905	1.02272	1.20229	1.2648	1.44635	1.68961	1.98523	2.35992	2.80628	3.65824	7.44554	23.1761	72.9566
0.0789267	0.173808	0.248047	0.301654	0.393536	0.496094	0.55465	0.700853	0.788412	0.932232	1.02272	1.20347	1.2648	1.44635	1.69327	1.98632	2.36191	2.81144	3.6618	7.55627	23.6946	73.6795
0.0789503	0.173994	0.248047	0.301789	0.393576	0.496094	0.55465	0.701583	0.788939	0.933694	1.02272	1.20389	1.2648	1.44635	1.7004	1.98712	2.3622	2.81461	3.67152	7.57254	23.8241
0.078994	0.174	0.248047	0.302452	0.393634	0.496094	0.55465	0.701583	0.790356	0.934688	1.02279	1.20415	1.2648	1.44635	1.70098	1.99643	2.36705	2.81858	3.67386	7.59283	23.9079
0.0790497	0.17401	0.248047	0.302666	0.394439	0.496094	0.55465	0.701583	0.79072	0.935205	1.02556	1.20527	1.2648	1.44772	1.70099	1.99757	2.36762	2.82588	3.68582	7.62498	25.0048
0.0791229	0.174102	0.248047	0.303047	0.395146	0.496094	0.55465	0.701583	0.791179	0.937016	1.02563	1.20575	1.2648	1.44925	1.70341	1.99982	2.36894	2.82817	3.68748	7.65738	25.2679
0.079147	0.174216	0.248047	0.303081	0.395365	0.496094	0.55465	0.701583	0.791322	0.93803	1.02666	1.20647	1.2648	1.45042	1.70386	1.99982	2.37207	2.82817	3.68748	7.78363	25.2813
0.0792483	0.174331	0.248047	0.303124	0.395726	0.496094	0.55465	0.701583	0.791912	0.938104	1.02739	1.2075	1.2648	1.45059	1.71146	1.99982	2.37328	2.82817	3.68748	7.78488	25.6977
0.0792746	0.17445	0.248047	0.303164	0.395886	0.496094	0.55465	0.701583	0.792141	0.939477	1.02971	1.20755	1.2648	1.45252	1.72239	1.99982	2.37402	2.83059	3.68748	7.78883	26.065
0.0793041	0.17455	0.248047	0.303392	0.396104	0.496094	0.556142	0.701583	0.793589	0.942516	1.02997	1.20935	1.2648	1.45502	1.72513	1.99982	2.38453	2.83363	3.68748	7.80201	26.0721
0.0793209	0.174599	0.248047	0.303626	0.39637	0.496094	0.556823	0.701583	0.794216	0.942881	1.03115	1.21155	1.2648	1.45612	1.7277	1.99982	2.38808	2.8359	3.68748	7.91333	26.4609
0.0793324	0.174826	0.248047	0.303701	0.39696	0.496094	0.558914	0.701583	0.794818	0.943356	1.03123	1.21188	1.2648	1.45647	1.73188	1.99982	2.39039	2.8372	3.68748	7.94137	26.6809
0.0794308	0.174925	0.248047	0.30387	0.397165	0.496094	0.559665	0.701583	0.795536	0.944236	1.03322	1.2131	1.2648	1.46166	1.73237	1.99982	2.39365	2.83808	3.68748	7.94137	26.9185
0.079513	0.174991	0.248047	0.303906	0.39769	0.496094	0.560026	0.701583	0.796307	0.944295	1.03342	1.21548	1.2648	1.46191	1.73265	1.99982	2.39495	2.83816	3.69423	7.94137	27.3943
0.0796231	0.175011	0.248047	0.304079	0.397857	0.496094	0.560039	0.701583	0.797385	0.946445	1.03402	1.21585	1.2648	1.46702	1.73297	1.99982	2.41702	2.83978	3.71233	7.94137	27.5645
0.0796235	0.175126	0.248047	0.304366	0.397878	0.496094	0.560297	0.704352	0.797394	0.946591	1.03473	1.21592	1.2648	1.46821	1.73484	1.99982	2.42235	2.84282	3.71656	7.94137	27.738
0.0796498	0.175205	0.248047	0.304446	0.399025	0.496094	0.560375	0.704638	0.798243	0.947365	1.03705	1.21647	1.2648	1.46905	1.73551	1.99986	2.42523	2.8523	3.75363	7.94137	27.8542
0.0796695	0.17539	0.248047	0.304875	0.399075	0.496094	0.5608	0.704903	0.798309	0.947536	1.03855	1.21676	1.2648	1.46973	1.73633	2.00008	2.42894	2.86161	3.77814	7.94137	27.981
0.0797282	0.175568	0.248047	0.304885	0.399304	0.496094	0.561062	0.704943	0.79864	0.949273	1.03863	1.21694	1.2648	1.47159	1.73633	2.00812	2.4312	2.86164	3.79439	7.94137	28.0106
0.0797312	0.17563	0.248047	0.305386	0.399577	0.496094	0.561829	0.706637	0.800128	0.94937	1.03886	1.21725	1.2648	1.47469	1.73633	2.00851	2.43386	2.86711	3.79439	7.98773	28.1181
0.0797495	0.175916	0.248047	0.305834	0.399579	0.496094	0.56187	0.707282	0.800447	0.949564	1.03971	1.2212	1.2648	1.47653	1.73633	2.01886	2.44097	2.8745	3.79439	7.99927	28.2174
0.0797774	0.175945	0.248047	0.306025	0.399734	0.496094	0.562142	0.708418	0.802627	0.949719	1.03985	1.22226	1.2648	1.47674	1.73633	2.02315	2.44285	2.87516	3.79439	8.01889	28.5124
0.0797778	0.176126	0.248047	0.306327	0.399753	0.496094	0.562449	0.709226	0.802699	0.950168	1.03999	1.22418	1.2648	1.47777	1.73633	2.02321	2.44298	2.87796	3.82895	8.03381	28.5556
0.0797822	0.176306	0.248047	0.306538	0.400154	0.496094	0.562663	0.709567	0.804922	0.950603	1.04154	1.22487	1.2648	1.47803	1.73633	2.02404	2.44298	2.88168	3.85072	8.21181	28.9025
0.0798226	0.1764	0.248047	0.306999	0.400979	0.496094	0.563445	0.710272	0.805147	0.950933	1.04344	1.22573	1.2648	1.48281	1.73633	2.02718	2.44298	2.88499	3.85072	8.21556	28.9451
0.0798376	0.176414	0.248047	0.307148	0.401387	0.496094	0.564482	0.710739	0.805422	0.951252	1.04348	1.22583	1.2648	1.48369	1.73633	2.02727	2.44298	2.88957	3.85072	8.22776	28.9536
0.0800859	0.176572	0.248047	0.307242	0.401409	0.496094	0.565668	0.710814	0.807767	0.95293	1.04357	1.22923	1.2648	1.48626	1.73633	2.03047	2.44673	2.8927	3.85145	8.43359	29.0225
0.0801304	0.176598	0.248047	0.307335	0.401483	0.496094	0.565704	0.710897	0.808401	0.953321	1.04374	1.23281	1.2651	1.48828	1.73633	2.03103	2.45009	2.8927	3.87462	8.44817	29.4205
0.0801652	0.176646	0.248047	0.307483	0.401865	0.496094	0.565776	0.710898	0.809757	0.953411	1.04394	1.23362	1.26583	1.48828	1.73633	2.03203	2.4543	2.8927	3.87462	8.58858	29.6081
0.0802239	0.176669	0.248047	0.307521	0.402098	0.496094	0.566389	0.710939	0.810361	0.954475	1.04436	1.23441	1.26647	1.48828	1.73633	2.0327	2.4591	2.8927	3.87462	8.76978	29.7512
0.0802655	0.17671	0.248047	0.307942	0.402206	0.496094	0.566709	0.71132	0.811576	0.954592	1.0453	1.23506	1.27065	1.48828	1.74074	2.03285	2.47184	2.8927	3.87462	8.85357	29.9973
0.0802707	0.176758	0.248047	0.308044	0.402992	0.496094	0.566759	0.711805	0.812111	0.954616	1.04629	1.2357	1.27147	1.48828	1.74085	2.03352	2.47425	2.89505	3.87462	8.86643	30.0301
0.0804737	0.176912	0.248047	0.308163	0.403403	0.496094	0.567425	0.713868	0.812513	0.95463	1.04931	1.23707	1.27185	1.48828	1.74119	2.03418	2.47973	2.89769	3.91712	8.9469	30.1864
0.0805749	0.177091	0.248047	0.308388	0.403432	0.496094	0.567539	0.715253	0.812673	0.954941	1.05101	1.23729	1.27251	1.48828	1.74216	2.03682	2.48047	2.89895	3.92197	8.96064	30.344
0.0806152	0.177155	0.248047	0.308448	0.403498	0.496094	0.567712	0.715974	0.813146	0.955171	1.05237	1.24023	1.27424	1.48828	1.746	2.04441	2.48047	2.89981	3.92197	8.96064	30.4603
0.0808253	0.177237	0.248047	0.308518	0.403535	0.496094	0.568016	0.716885	0.813178	0.955675	1.05237	1.24023	1.27551	1.48828	1.7471	2.04545	2.48047	2.9005	3.92197	9.02904	30.5913
0.0809114	0.177369	0.248047	0.308625	0.403682	0.496094	0.568241	0.717305	0.813682	0.956478	1.05237	1.24023	1.27564	1.4895	1.7491	2.04674	2.48047	2.90311	3.92197	9.02904	30.6797
0.0809531	0.177577	0.248047	0.309	0.403978	0.496094	0.568295	0.717923	0.815264	0.95773	1.05237	1.24023	1.27776	1.49221	1.75127	2.04816	2.48047	2.90829	3.95313	9.18109	30.7998
0.0810078	0.177622	0.248047	0.309057	0.404134	0.496094	0.569127	0.719136	0.81675	0.959152	1.05237	1.24023	1.28376	1.49535	1.75211	2.05147	2.48047	2.92037	3.97649	9.22788	30.8706
0.0810153	0.177653	0.248047	0.309171	0.404208	0.496094	0.569366	0.720421	0.81758	0.96127	1.05237	1.24023	1.28529	1.50259	1.75396	2.05302	2.48047	2.92131	3.97649	9.33724	30.982
0.08104	0.177684	0.248047	0.309208	0.405521	0.496094	0.569879	0.720493	0.819539	0.961339	1.05237	1.24023	1.28863	1.50859	1.75396	2.06537	2.48047	2.9229	4.00732	9.57474	31.1257
0.081196	0.177716	0.248047	0.309448	0.40704	0.496094	0.571538	0.721721	0.820517	0.962313	1.05237	1.24023	1.29055	1.50881	1.75396	2.06562	2.48047	2.93169	4.00732	9.67383	31.1563
0.0812774	0.177727	0.248047	0.309699	0.407634	0.496094	0.571659	0.721746	0.821217	0.963968	1.05237	1.24023	1.29196	1.50881	1.75396	2.06646	2.48047	2.93413	4.00732	9.77506	31.1731
0.0813164	0.177727	0.248047	0.310188	0.407688	0.496094	0.571831	0.721946	0.822891	0.964646	1.05237	1.24023	1.29305	1.50881	1.75396	2.06873	2.48047	2.93647	4.065	10.0359	31.1997
0.0813341	0.177946	0.248047	0.310303	0.407722	0.496094	0.572712	0.722067	0.822956	0.966982	1.05348	1.24023	1.29344	1.50881	1.75396	2.07109	2.48047	2.94136	4.06748	10.1214	31.3522
0.0813576	0.177977	0.248047	0.310458	0.408098	0.496094	0.572719	0.722206	0.822996	0.968112	1.05349	1.24023	1.29492	1.50881	1.75396	2.07167	2.48047	2.94988	4.06827	10.3884	31.3953
0.0813648	0.178126	0.248047	0.310995	0.408162	0.496094	0.572831	0.72285	0.823065	0.970395	1.05358	1.24023	1.29527	1.50881	1.75396	2.07584	2.48047	2.96037	4.06827	10.4298	31.409
0.081526	0.17813	0.248047	0.311355	0.408454	0.496094	0.572936	0.723858	0.82421	0.970858	1.05377	1.24023	1.29591	1.50881	1.75396	2.07866	2.48047	2.97046	4.06827	10.5966	31.581
0.0815529	0.178162	0.248047	0.311415	0.408616	0.496094	0.573011	0.724511	0.824278	0.971326	1.05431	1.24023	1.29818	1.50881	1.75396	2.07942	2.48047	2.97673	4.06827	10.5966	31.7209
0.0816146	0.178186	0.248047	0.311475	0.409253	0.496094	0.573619	0.72603	0.824296	0.971711	1.0546	1.24023	1.3012	1.50881	1.75396	2.08159	2.48047	2.98548	4.06827	10.5966	31.812
0.0816377	0.178213	0.248047	0.311677	0.409818	0.496094	0.574333	0.726744	0.825392	0.972085	1.05626	1.24023	1.30139	1.50881	1.75396	2.08242	2.48047	2.9879	4.06827	10.5966	32.1984
0.0816617	0.178319	0.248047	0.312087	0.41039	0.496094	0.574673	0.729383	0.826426	0.972886	1.05721	1.24023	1.30417	1.50881	1.75396	2.08335	2.48047	2.99021	4.06827	10.6689	32.2804
0.0817216	0.178383	0.248047	0.312161	0.410557	0.496094	0.574829	0.729624	0.826785	0.973187	1.05883	1.24023	1.30446	1.51	1.75396	2.08441	2.48047	2.9956	4.09089	10.6775	32.3233
0.0818225	0.1784	0.248047	0.312229	0.410835	0.496094	0.575306	0.730183	0.826789	0.974147	1.05908	1.24023	1.30517	1.51186	1.75396	2.08779	2.48047	2.99716	4.10591	10.6862	32.3917
0.0818469	0.178486	0.248047	0.312709	0.410851	0.496094	0.575371	0.730802	0.827799	0.97467	1.05912	1.24023	1.30831	1.51344	1.75396	2.09067	2.48047	2.99716	4.10591	10.6862	32.4145
0.0822855	0.178521	0.248047	0.312793	0.411243	0.496094	0.575631	0.731525	0.828515	0.974714	1.06028	1.24023	1.30833	1.51559	1.75396	2.09243	2.48047	2.99716	4.11193	10.8292	32.4951
0.082334	0.178575	0.248047	0.312938	0.411277	0.496094	0.575742	0.731553	0.828843	0.975349	1.06083	1.24023	1.30889	1.51764	1.75396	2.09422	2.48047	2.99716	4.15682	10.8717	32.5093
0.0824563	0.178702	0.248047	0.313313	0.412134	0.496094	0.576066	0.732056	0.83072	0.976788	1.06131	1.24023	1.30923	1.52112	1.75396	2.10104	2.48047	2.99767	4.15802	10.9169	32.7431
0.0824966	0.17871	0.248047	0.313343	0.412149	0.496094	0.576068	0.732085	0.831028	0.977226	1.06285	1.24023	1.31165	1.52114	1.75396	2.10406	2.48346	3.00105	4.18907	11.0624	32.9986
0.0825038	0.178947	0.248047	0.313641	0.412314	0.496094	0.576226	0.732295	0.831439	0.977329	1.06333	1.24023	1.31365	1.52157	1.75396	2.10471	2.49284	3.00187	4.19074	11.0624	32.9986
0.082592	0.179111	0.248047	0.313718	0.412598	0.496094	0.577767	0.732873	0.831682	0.977795	1.06335	1.24023	1.31446	1.52168	1.75396	2.10578	2.49284	3.00786	4.21285	11.1483	33.2614
0.0826056	0.179141	0.248047	0.313836	0.412642	0.496094	0.578097	0.733248	0.832315	0.978242	1.0641	1.24023	1.31643	1.52193	1.75396	2.10897	2.49716	3.01783	4.21448	11.1483	33.7426
0.0826553	0.179202	0.248047	0.314034	0.412723	0.496094	0.578474	0.733589	0.832363	0.979689	1.06463	1.24023	1.31669	1.52314	1.75396	2.10931	2.50259	3.01902	4.2168	11.2963	33.7927
0.0827014	0.17971	0.248047	0.314146	0.412854	0.496094	0.579538	0.734157	0.832768	0.981126	1.06647	1.24023	1.31702	1.52359	1.75396	2.11816	2.5039	3.02714	4.2168	11.3588	33.8554
0.082805	0.179827	0.248047	0.314381	0.41293	0.496094	0.579593	0.734229	0.832977	0.981746	1.06716	1.24023	1.31878	1.52475	1.75396	2.11931	2.50917	3.0278	4.21951	11.3805	33.8881
0.0828852	0.179864	0.248047	0.314398	0.412951	0.496094	0.579764	0.736779	0.833852	0.982305	1.07033	1.24023	1.3201	1.52517	1.75396	2.11931	2.51906	3.0278	4.22409	11.4344	33.967
0.0829117	0.179908	0.248047	0.314694	0.412965	0.496094	0.580431	0.737196	0.834213	0.98286	1.07106	1.24023	1.32028	1.52643	1.75396	2.12279	2.52959	3.0278	4.22409	11.4344	34.243
0.0830443	0.179964	0.248047	0.315246	0.413415	0.496094	0.58069	0.737364	0.835951	0.983004	1.07317	1.24023	1.32034	1.52935	1.75396	2.12398	2.52959	3.0278	4.2297	11.4532	34.4892
[truncated: 5,217 more rows]
