# Supplementary material for: Long-term intravital imaging of the multicolor-coded tumor microenvironment during combination immunotherapy
Source: eLife. 2016 Nov 18;5:e14756. doi: 10.7554/eLife.14756 (PMC5173323; doi:10.7554/eLife.14756)
Supplement: Figure 5—source data 5. — DOI: http://dx.doi.org/10.7554/eLife.14756.040 [file elife-14756-fig5-data5.xls]

## Sheet: displacement(um)
0	0	0	0	0	0	0	0	0	0	0	0	0	0	0	0	0	0	0	0	0	0	0	0	0	0	0	0	0.17944	0.753437
0	0	0	0	0	0	0	0	0	0	0	0	0	0	0	0	0	0	0	0	0	0	0	0	0	0	0	0	0.248047	0.828292
0	0	0	0	0	0	0	0	0	0	0	0	0	0	0	0	0	0	0	0	0	0	0	0	0	0	0	0	0.284126	0.953621
0	0	0	0	0	0	0	0	0	0	0	0	0	0	0	0	0	0	0	0	0	0	0	0	0	0	0	0.161756	0.496094	1.01187
0	0	0	0	0	0	0	0	0	0	0	0	0	0	0	0	0	0	0	0	0	0	0	0	0	0	0	0.176797	0.52956	1.04453
0	0	0	0	0	0	0	0	0	0	0	0	0	0	0	0	0	0	0	0	0	0	0	0	0	0	0	0.199176	0.658689	1.10739
0	0	0	0	0	0	0	0	0	0	0	0	0	0	0	0	0	0	0	0	0	0	0	0	0	0	0.198263	0.209674	0.704384	1.12149
0	0	0	0	0	0	0	0	0	0	0	0	0	0	0	0	0	0	0	0	0	0	0	0	0	0	0.23237	0.248047	0.71135	1.19166
0	0	0	0	0	0	0	0	0	0	0	0	0	0	0	0	0	0	0	0	0	0	0	0	0	0	0.248047	0.326604	0.744141	1.24023
0	0	0	0	0	0	0	0	0	0	0	0	0	0	0	0	0	0	0	0	0	0	0	0.128127	0.0981765	0.0736547	0.26642	0.450778	0.766675	1.27443
0	0	0	0	0	0	0	0	0	0	0	0	0	0	0	0	0	0	0	0	0	0	0.052182	0.153052	0.112229	0.0771288	0.287869	0.496094	0.785469	1.29192
0	0	0	0	0	0	0	0	0	0	0	0	0	0	0	0	0	0	0	0	0	0	0.200395	0.193296	0.119306	0.188134	0.300246	0.513098	0.850724	1.37197
0	0	0	0	0	0	0	0	0	0	0	0	0	0	0	0	0	0	0	0	0	0	0.217163	0.220891	0.120636	0.226949	0.300886	0.545785	0.867171	1.37304
0	0	0	0	0	0	0	0	0	0	0	0	0	0	0	0	0	0	0	0	0	0	0.220436	0.22111	0.139916	0.303894	0.304109	0.549946	0.876972	1.37874
0	0	0	0	0	0	0	0	0	0	0	0	0	0	0	0	0	0	0	0	0	0.063697	0.220647	0.248047	0.20118	0.316145	0.307974	0.564442	0.920502	1.83436
0	0	0	0	0	0	0	0	0	0	0	0	0	0	0	0	0	0	0	0	0	0.170662	0.229361	0.259025	0.231826	0.319045	0.312173	0.574897	0.936381	2.13429
0	0	0	0	0	0	0	0	0	0	0	0	0	0	0	0	0	0	0	0	0	0.202372	0.245531	0.264116	0.248047	0.350791	0.321144	0.606681	0.949253	2.13707
0	0	0	0	0	0	0	0	0	0	0	0	0	0	0	0	0	0	0	0	0.117263	0.231799	0.248047	0.264344	0.291377	0.36655	0.446855	0.679474	0.973412	2.20792
0	0	0	0	0	0	0	0	0	0	0	0	0	0	0	0	0	0	0	0	0.132414	0.238709	0.248047	0.277924	0.292718	0.366982	0.453396	0.684538	0.988245	2.27743
0	0	0	0	0	0	0	0	0	0	0	0	0	0	0	0	0	0	0.0156511	0	0.156754	0.248047	0.248047	0.290193	0.293527	0.372257	0.453574	0.692086	1.00778	2.44657
0	0	0	0	0	0	0	0	0	0	0	0	0	0	0	0	0	0	0.03009	0	0.171691	0.248047	0.256352	0.293629	0.29375	0.372409	0.457654	0.726557	1.02795	2.48047
0	0	0	0	0	0	0	0	0	0	0	0	0	0	0	0	0	0	0.0378816	0.0681411	0.180197	0.248047	0.263618	0.303898	0.315227	0.379819	0.468098	0.738534	1.04898	2.52121
0	0	0	0	0	0	0	0	0	0	0	0	0	0	0	0	0	0	0.0382012	0.0812695	0.193407	0.248047	0.263643	0.324681	0.328594	0.388738	0.479557	0.744141	1.07342	2.56743
0	0	0	0	0	0	0	0	0	0	0	0	0	0	0	0	0	0	0.0504434	0.0868186	0.193847	0.248047	0.26622	0.330728	0.329605	0.392422	0.484053	0.747685	1.08108	2.67874
0	0	0	0	0	0	0	0	0	0	0	0	0	0	0	0	0	0	0.052087	0.0899242	0.194817	0.255342	0.273525	0.331189	0.343398	0.394312	0.489285	0.76672	1.09068	2.7174
0	0	0	0	0	0	0	0	0	0	0	0	0	0	0	0	0	0	0.0660014	0.0916718	0.200396	0.261604	0.274384	0.331643	0.343527	0.402282	0.496094	0.789737	1.10504	2.75567
0	0	0	0	0	0	0	0	0	0	0	0	0	0	0	0	0	0	0.0677896	0.092163	0.204346	0.266792	0.274888	0.337265	0.343812	0.402577	0.500551	0.809505	1.15363	2.77325
0	0	0	0	0	0	0	0	0	0	0	0	0	0	0	0	0	0	0.0710298	0.102403	0.212761	0.269585	0.283648	0.346413	0.362268	0.418651	0.533052	0.817292	1.15696	2.98515
0	0	0	0	0	0	0	0	0	0	0	0	0	0	0	0	0	0	0.0820309	0.102742	0.21283	0.272664	0.286423	0.35252	0.362469	0.424449	0.541628	0.829704	1.18767	3.10417
0	0	0	0	0	0	0	0	0	0	0	0	0	0	0	0	0	0	0.0931746	0.114372	0.221132	0.272763	0.288645	0.352838	0.372398	0.427128	0.549827	0.832257	1.19252	3.27781
0	0	0	0	0	0	0	0	0	0	0	0	0	0	0	0	0	0	0.0953502	0.116913	0.221892	0.275639	0.289237	0.356154	0.373889	0.43413	0.576366	0.865522	1.20547	3.31178
0	0	0	0	0	0	0	0	0	0	0	0	0	0	0	0	0	0.0282428	0.107721	0.119806	0.222524	0.276325	0.301089	0.364892	0.392876	0.441929	0.603237	0.872434	1.21233	3.31415
0	0	0	0	0	0	0	0	0	0	0	0	0	0	0	0	0	0.0392267	0.112745	0.121061	0.225867	0.277704	0.308666	0.368772	0.396713	0.446728	0.656925	0.875872	1.24023	3.45787
0	0	0	0	0	0	0	0	0	0	0	0	0	0	0	0	0	0.0429051	0.122581	0.121139	0.227766	0.280902	0.310286	0.373049	0.397716	0.447148	0.664576	0.876411	1.24023	3.50791
0	0	0	0	0	0	0	0	0	0	0	0	0	0	0	0	0	0.0571739	0.123185	0.124646	0.228349	0.287017	0.310667	0.379576	0.407576	0.456741	0.6689	0.900712	1.24466	3.70244
0	0	0	0	0	0	0	0	0	0	0	0	0	0	0	0	0	0.0575224	0.123951	0.126287	0.229296	0.287388	0.311287	0.382172	0.422347	0.463922	0.669092	0.902742	1.24701	3.79901
0	0	0	0	0	0	0	0	0	0	0	0	0	0	0	0	0	0.0637371	0.137434	0.130309	0.23016	0.298594	0.317184	0.382184	0.425695	0.467925	0.677275	0.903491	1.25155	3.92197
0	0	0	0	0	0	0	0	0	0	0	0	0	0	0	0	0	0.0664955	0.138383	0.139836	0.233183	0.299814	0.319648	0.383437	0.431232	0.469309	0.686397	0.908702	1.26481	3.92197
0	0	0	0	0	0	0	0	0	0	0	0	0	0	0	0	0	0.0674602	0.141324	0.141001	0.248047	0.299948	0.327854	0.387343	0.433249	0.475395	0.686795	0.915348	1.28943	3.92197
0	0	0	0	0	0	0	0	0	0	0	0	0	0	0	0	0	0.0772577	0.145057	0.149875	0.248047	0.305238	0.330852	0.395788	0.43795	0.502508	0.70674	0.939512	1.32648	3.96773
0	0	0	0	0	0	0	0	0	0	0	0	0	0	0	0	0	0.0866999	0.147005	0.158228	0.248047	0.305495	0.333277	0.397579	0.447134	0.518483	0.726455	0.940975	1.33664	3.9785
0	0	0	0	0	0	0	0	0	0	0	0	0	0	0	0	0	0.0905247	0.150262	0.16749	0.248047	0.30569	0.333307	0.398102	0.451667	0.522314	0.726503	0.978775	1.37004	4.10686
0	0	0	0	0	0	0	0	0	0	0	0	0	0	0	0	0	0.0928246	0.151032	0.176712	0.248047	0.308924	0.333799	0.399169	0.454403	0.547208	0.741973	0.985619	1.40977	5.11362
0	0	0	0	0	0	0	0	0	0	0	0	0	0	0	0	0	0.0929115	0.153169	0.178466	0.248047	0.310268	0.336288	0.400252	0.461921	0.565927	0.742569	0.992177	1.42501	5.19031
0	0	0	0	0	0	0	0	0	0	0	0	0	0	0	0	0	0.0948134	0.153775	0.182459	0.263269	0.310703	0.337472	0.404213	0.462658	0.56868	0.744141	0.997465	1.43661	6.32398
0	0	0	0	0	0	0	0	0	0	0	0	0	0	0	0	0.0177839	0.102094	0.167212	0.187709	0.267072	0.313075	0.345326	0.404761	0.468606	0.577894	0.747893	0.998447	1.437	6.53666
0	0	0	0	0	0	0	0	0	0	0	0	0	0	0	0	0.0283148	0.106935	0.170057	0.197863	0.271211	0.316809	0.346601	0.407504	0.469638	0.582203	0.752598	1.02616	1.44307	7.78974
0	0	0	0	0	0	0	0	0	0	0	0	0	0	0	0	0.0319797	0.110864	0.17278	0.198575	0.273189	0.317137	0.348637	0.410117	0.469846	0.595382	0.760035	1.03379	1.47294	8.59648
0	0	0	0	0	0	0	0	0	0	0	0	0	0	0	0	0.0519797	0.113499	0.182035	0.22628	0.276475	0.320503	0.349357	0.413936	0.469873	0.598004	0.760876	1.05524	1.48828	8.76978
0	0	0	0	0	0	0	0	0	0	0	0	0	0	0	0	0.0584489	0.115937	0.182883	0.231125	0.277306	0.320733	0.352663	0.418304	0.477462	0.605133	0.774022	1.07855	1.49733	8.93759
0	0	0	0	0	0	0	0	0	0	0	0	0	0	0	0	0.064949	0.118802	0.18453	0.23384	0.277429	0.323214	0.355902	0.418744	0.486293	0.605917	0.778382	1.08778	1.51949	9.08639
0	0	0	0	0	0	0	0	0	0	0	0	0	0	0	0	0.0725135	0.122794	0.187275	0.24188	0.278021	0.323935	0.364345	0.420171	0.489432	0.607999	0.781953	1.09702	1.55081	10.3569
0	0	0	0	0	0	0	0	0	0	0	0	0	0	0	0	0.0731916	0.122977	0.1882	0.245783	0.289059	0.324174	0.375827	0.427439	0.490788	0.611915	0.800928	1.11297	1.5534	27.2287
0	0	0	0	0	0	0	0	0	0	0	0	0	0	0	0	0.0732545	0.124467	0.1884	0.248047	0.293032	0.32559	0.377163	0.432358	0.492904	0.612277	0.806264	1.13841	1.57687
0	0	0	0	0	0	0	0	0	0	0	0	0	0	0	0.0162943	0.0737497	0.130327	0.19024	0.248047	0.296563	0.333428	0.3778	0.43542	0.496094	0.621161	0.810446	1.16082	1.57997
0	0	0	0	0	0	0	0	0	0	0	0	0	0	0	0.0239827	0.0833268	0.131057	0.1911	0.248047	0.300535	0.333471	0.38196	0.439628	0.498642	0.624221	0.824023	1.16353	1.61097
0	0	0	0	0	0	0	0	0	0	0	0	0	0	0	0.0426711	0.0836358	0.131968	0.199936	0.248047	0.303805	0.334121	0.389294	0.450959	0.508695	0.624677	0.843026	1.20163	1.66446
0	0	0	0	0	0	0	0	0	0	0	0	0	0	0	0.0456558	0.0852852	0.136619	0.20666	0.248047	0.311252	0.334442	0.389469	0.454848	0.513179	0.630672	0.845446	1.20235	1.66868
0	0	0	0	0	0	0	0	0	0	0	0	0	0	0	0.0470529	0.0864042	0.136803	0.207812	0.248047	0.313938	0.335322	0.390199	0.455574	0.519001	0.631839	0.848509	1.21103	1.67477
0	0	0	0	0	0	0	0	0	0	0	0	0	0	0	0.0624286	0.0871555	0.140844	0.207812	0.248047	0.317903	0.335369	0.398194	0.458964	0.523826	0.632145	0.863137	1.2275	1.70432
0	0	0	0	0	0	0	0	0	0	0	0	0	0	0	0.0630224	0.0900244	0.141666	0.207812	0.248047	0.319901	0.337149	0.398365	0.462792	0.528047	0.632202	0.863673	1.23234	1.71137
0	0	0	0	0	0	0	0	0	0	0	0	0	0	0	0.0643214	0.0936266	0.146334	0.207812	0.248047	0.322838	0.340311	0.400656	0.464791	0.534829	0.64217	0.884164	1.23254	1.7221
0	0	0	0	0	0	0	0	0	0	0	0	0	0	0.00771442	0.065278	0.0946019	0.151255	0.207812	0.252916	0.330245	0.343839	0.406225	0.468176	0.538415	0.679999	0.892935	1.24023	1.7358
0	0	0	0	0	0	0	0	0	0	0	0	0	0.0304984	0.0267893	0.0737665	0.0951699	0.153772	0.207813	0.254108	0.332347	0.351893	0.409231	0.473186	0.558038	0.680086	0.916623	1.24023	1.76262
0	0	0	0	0	0	0	0	0	0	0	0	0	0.0380784	0.0389625	0.0754521	0.095716	0.15389	0.216332	0.259881	0.332625	0.355981	0.409924	0.474947	0.558614	0.682348	0.931706	1.24023	1.81268
0	0	0	0	0	0	0	0	0	0	0	0	0	0.039945	0.0449224	0.0800915	0.100948	0.15517	0.225475	0.261696	0.33286	0.356675	0.411525	0.479476	0.56736	0.689356	0.961132	1.24023	1.85301
0	0	0	0	0	0	0	0	0	0	0	0	0	0.0459942	0.0451772	0.0876475	0.103458	0.160539	0.227064	0.262481	0.333342	0.360589	0.413409	0.484938	0.571783	0.689659	0.961135	1.24023	1.86127
0	0	0	0	0	0	0	0	0	0	0	0	0	0.0583063	0.0502826	0.0892225	0.110104	0.162188	0.227492	0.267802	0.335202	0.362723	0.419092	0.496094	0.573333	0.69137	0.966628	1.26216	1.87691
0	0	0	0	0	0	0	0	0	0	0	0	0	0.0681005	0.0535675	0.0910302	0.111597	0.163263	0.228836	0.269779	0.335304	0.36879	0.419889	0.502977	0.586175	0.701583	0.973808	1.29035	1.88519
0	0	0	0	0	0	0	0	0	0	0	0	0	0.0684051	0.0630903	0.0914619	0.112576	0.166701	0.229671	0.270336	0.339178	0.371272	0.43413	0.508968	0.58673	0.744923	0.974276	1.29038	1.89366
0	0	0	0	0	0	0	0	0	0	0	0	0	0.0725892	0.0632686	0.0918083	0.114747	0.169724	0.230571	0.27547	0.339499	0.37424	0.437082	0.50929	0.598225	0.749375	0.97746	1.29301	1.89481
0	0	0	0	0	0	0	0	0	0	0	0	0	0.0756923	0.0650292	0.0981828	0.115638	0.170231	0.23807	0.279085	0.341776	0.37471	0.437926	0.522964	0.602733	0.750608	0.977526	1.30134	1.90104
0	0	0	0	0	0	0	0	0	0	0	0	0	0.0825139	0.0654395	0.100821	0.116673	0.173459	0.241006	0.279283	0.342015	0.376975	0.442689	0.524864	0.608176	0.766791	1.02249	1.30338	1.91839
0	0	0	0	0	0	0	0	0	0	0	0	0	0.0826307	0.0657854	0.102762	0.125188	0.173972	0.248047	0.283817	0.354585	0.383862	0.44621	0.528003	0.617115	0.770366	1.02303	1.32521	1.92379
0	0	0	0	0	0	0	0	0	0	0	0	0	0.0833845	0.0696249	0.104656	0.125948	0.174689	0.248047	0.299782	0.356897	0.385545	0.454199	0.528888	0.620606	0.779356	1.03422	1.3503	1.9565
0	0	0	0	0	0	0	0	0	0	0	0	0	0.0834274	0.0757321	0.105906	0.126415	0.174712	0.248047	0.311573	0.358983	0.393921	0.454726	0.529307	0.621205	0.78242	1.04444	1.35885	1.97106
0	0	0	0	0	0	0	0	0	0	0	0	0	0.0836639	0.0791088	0.114238	0.127262	0.175068	0.248047	0.314109	0.363152	0.396748	0.462303	0.536015	0.626709	0.791085	1.04727	1.39091	1.97849
0	0	0	0	0	0	0	0	0	0	0	0	0	0.0843147	0.0791954	0.116241	0.128002	0.176199	0.248047	0.32192	0.364933	0.397822	0.46321	0.54347	0.63227	0.797683	1.06624	1.39669	1.98438
0	0	0	0	0	0	0	0	0	0	0	0	0.0128864	0.10165	0.0813549	0.117718	0.128132	0.177281	0.248047	0.327353	0.367381	0.399141	0.466274	0.546783	0.636029	0.806091	1.06908	1.3983	2.00682
0	0	0	0	0	0	0	0	0	0	0	0	0.0361991	0.102564	0.0825495	0.118168	0.130109	0.179352	0.248047	0.33912	0.370743	0.399742	0.469338	0.553193	0.643193	0.807135	1.07684	1.42233	2.00756
0	0	0	0	0	0	0	0	0	0	0	0	0.037871	0.103397	0.091597	0.120087	0.130455	0.179922	0.248047	0.34087	0.370792	0.400134	0.476563	0.554376	0.681765	0.814883	1.07828	1.42659	2.01897
0	0	0	0	0	0	0	0	0	0	0	0	0.0394661	0.10468	0.0939918	0.12402	0.131578	0.183624	0.248047	0.344794	0.374993	0.404856	0.476892	0.55465	0.683882	0.81889	1.08194	1.42881	2.03485
0	0	0	0	0	0	0	0	0	0	0	0	0.041772	0.104809	0.095124	0.124565	0.133971	0.184889	0.248047	0.347721	0.378278	0.406	0.477396	0.55465	0.686436	0.827157	1.10915	1.44191	2.09842
0	0	0	0	0	0	0	0	0	0	0	0	0.0452552	0.108736	0.0967063	0.131189	0.135326	0.189096	0.254897	0.350791	0.378715	0.416471	0.478406	0.566541	0.686763	0.829556	1.11275	1.45188	2.10088
0	0	0	0	0	0	0	0	0	0	0	0	0.0508496	0.108752	0.0991289	0.131303	0.141541	0.190224	0.258525	0.351406	0.387702	0.422413	0.484393	0.56672	0.694414	0.872515	1.11334	1.4605	2.1145
0	0	0	0	0	0	0	0	0	0	0	0	0.051764	0.108815	0.101049	0.133295	0.146404	0.194622	0.261608	0.352439	0.389228	0.429393	0.486519	0.56704	0.697495	0.875186	1.12089	1.46593	2.12019
0	0	0	0	0	0	0	0	0	0	0	0	0.0602041	0.10975	0.102461	0.133482	0.149514	0.198845	0.262831	0.352996	0.396221	0.430737	0.496094	0.567107	0.698013	0.882426	1.14288	1.47437	2.12287
0	0	0	0	0	0	0	0	0	0	0	0	0.0659022	0.113123	0.104788	0.13524	0.152738	0.199196	0.26528	0.355783	0.396425	0.431628	0.496094	0.583711	0.7	0.893455	1.14643	1.47549	2.16548
0	0	0	0	0	0	0	0	0	0	0	0	0.0664301	0.113923	0.106845	0.135679	0.153974	0.20363	0.266231	0.356268	0.400902	0.433691	0.496094	0.585673	0.70137	0.894062	1.15407	1.48828	2.24777
0	0	0	0	0	0	0	0	0	0	0	0	0.0676529	0.115332	0.106914	0.135876	0.155549	0.20427	0.268649	0.36109	0.402249	0.439806	0.500982	0.589224	0.703467	0.896483	1.161	1.49059	2.26994
0	0	0	0	0	0	0	0	0	0	0	0	0.0681053	0.115368	0.107836	0.137411	0.160767	0.207812	0.269928	0.362976	0.402841	0.440564	0.501971	0.58956	0.708504	0.899951	1.17541	1.49689	2.28245
0	0	0	0	0	0	0	0	0	0	0	0.0334901	0.0692931	0.117962	0.108036	0.137727	0.165938	0.207812	0.275432	0.365822	0.40451	0.443613	0.507899	0.590763	0.720105	0.900692	1.18015	1.51859	2.29346
0	0	0	0	0	0	0	0	0	0	0	0.0352968	0.0738826	0.120353	0.113411	0.13876	0.167574	0.207812	0.284014	0.368528	0.405567	0.445973	0.509411	0.59832	0.731941	0.919868	1.22213	1.52299	2.32355
0	0	0	0	0	0	0	0	0	0	0	0.0359413	0.0763026	0.122633	0.116318	0.141099	0.169006	0.207812	0.284526	0.368581	0.405732	0.446728	0.518009	0.605531	0.736575	0.920572	1.23904	1.52985	2.32668
0	0	0	0	0	0	0	0	0	0	0	0.0366407	0.0767046	0.125697	0.117008	0.142495	0.172708	0.207812	0.28558	0.370368	0.410292	0.448039	0.52015	0.609569	0.744141	0.931291	1.24023	1.53323	2.3525
0	0	0	0	0	0	0	0	0	0	0	0.042155	0.0803636	0.12673	0.119151	0.143089	0.174345	0.207812	0.285882	0.372654	0.411967	0.457004	0.520657	0.619204	0.748077	0.932286	1.24023	1.54921	2.36571
0	0	0	0	0	0	0	0	0	0	0	0.0475665	0.0818559	0.128837	0.120744	0.143699	0.177346	0.207812	0.290172	0.372899	0.413152	0.459757	0.521701	0.6258	0.754115	0.934216	1.24023	1.55826	2.37696
0	0	0	0	0	0	0	0	0	0	0	0.052365	0.0831365	0.129956	0.121899	0.149739	0.179715	0.207812	0.292589	0.374225	0.417706	0.465186	0.524384	0.632727	0.757593	0.936107	1.24023	1.55907	2.4293
0	0	0	0	0	0	0	0	0	0	0	0.0560301	0.083991	0.133993	0.123936	0.152824	0.180394	0.207812	0.293242	0.375623	0.41918	0.465287	0.5298	0.633663	0.759027	0.939485	1.24752	1.55952	2.48047
0	0	0	0	0	0	0	0	0	0	0	0.0610114	0.0849849	0.134449	0.124459	0.152843	0.182306	0.207812	0.293891	0.377944	0.419765	0.465548	0.535514	0.63485	0.76043	0.981765	1.24768	1.57071	2.4832
0	0	0	0	0	0	0	0	0	0	0	0.0629234	0.0852116	0.135489	0.129178	0.153	0.182601	0.207812	0.293891	0.378889	0.421029	0.467807	0.53923	0.64776	0.773499	0.984229	1.24996	1.57855	2.49284
0	0	0	0	0	0	0	0	0	0	0	0.0657543	0.0871793	0.13648	0.130905	0.155601	0.189887	0.209097	0.294226	0.38003	0.425116	0.471503	0.545006	0.658848	0.775928	0.993193	1.25298	1.58851	2.49284
0	0	0	0	0	0	0	0	0	0	0	0.0694971	0.0885538	0.138737	0.134754	0.155989	0.190864	0.209121	0.29524	0.380578	0.430455	0.472967	0.545583	0.66519	0.79211	0.996836	1.25742	1.59818	2.4996
0	0	0	0	0	0	0	0	0	0	0	0.0704129	0.0893632	0.139859	0.134902	0.157779	0.191273	0.213054	0.295501	0.380957	0.433978	0.48003	0.547801	0.670196	0.806624	1.02064	1.2648	1.60526	2.51172
0	0	0	0	0	0	0	0	0	0	0	0.0725829	0.0949763	0.140232	0.137862	0.162099	0.191889	0.216358	0.29741	0.38178	0.435486	0.48287	0.555932	0.670675	0.815039	1.02183	1.2648	1.6089	2.58066
0	0	0	0	0	0	0	0	0	0	0	0.0746242	0.096963	0.141662	0.140393	0.163589	0.193782	0.217632	0.30108	0.381836	0.438542	0.484585	0.557789	0.675874	0.817036	1.02467	1.2648	1.62512	2.58969
0	0	0	0	0	0	0	0	0	0	0	0.0751596	0.100521	0.141774	0.141564	0.166018	0.193922	0.221718	0.303168	0.391112	0.440958	0.485791	0.557987	0.683342	0.829866	1.02854	1.2652	1.6252	2.6156
0	0	0	0	0	0	0	0	0	0	0	0.0761668	0.101646	0.142981	0.141672	0.171854	0.194004	0.224093	0.306444	0.392148	0.44205	0.486281	0.558591	0.685666	0.831378	1.03253	1.2676	1.63234	2.62654
0	0	0	0	0	0	0	0	0	0	0	0.0788233	0.103652	0.144399	0.14288	0.172037	0.198645	0.22576	0.306649	0.392619	0.446011	0.489855	0.561812	0.693785	0.848367	1.03399	1.28419	1.64129	2.62748
0	0	0	0	0	0	0	0	0	0	0	0.0803117	0.107475	0.14456	0.146511	0.17318	0.198992	0.226617	0.309444	0.394928	0.449048	0.494825	0.562421	0.695627	0.85895	1.03407	1.30733	1.65095	2.65137
0	0	0	0	0	0	0	0	0	0	0	0.0823673	0.108945	0.144752	0.150523	0.175625	0.20061	0.22673	0.309575	0.396155	0.452166	0.496094	0.563074	0.699809	0.861657	1.05237	1.31012	1.65423	2.65663
0	0	0	0	0	0	0	0	0	0	0	0.0829219	0.112829	0.144928	0.151185	0.177733	0.200674	0.228797	0.310961	0.396784	0.453029	0.496094	0.565059	0.700927	0.869789	1.05691	1.31061	1.66479	2.66774
0	0	0	0	0	0	0	0	0	0	0	0.0850045	0.11316	0.146468	0.154202	0.178095	0.204187	0.230588	0.310999	0.399817	0.454582	0.496094	0.570077	0.710857	0.871912	1.07315	1.32087	1.68508	2.6694
0	0	0	0	0	0	0	0	0	0	0	0.085866	0.115242	0.146535	0.154543	0.181475	0.205647	0.232564	0.311904	0.403173	0.454742	0.49662	0.572074	0.71154	0.883294	1.09894	1.32764	1.69541	2.68462
0	0	0	0	0	0	0	0	0	0	0	0.0871749	0.116142	0.147899	0.156247	0.183446	0.205761	0.236603	0.314048	0.403197	0.460353	0.497498	0.575423	0.716076	0.889745	1.10578	1.33419	1.71775	2.68735
0	0	0	0	0	0	0	0	0	0	0	0.0872011	0.116879	0.151158	0.156835	0.186866	0.206714	0.238569	0.315001	0.403662	0.461463	0.49785	0.602153	0.71934	0.891645	1.10597	1.33577	1.74021	2.72737
0	0	0	0	0	0	0	0	0	0	0	0.0874662	0.121579	0.153254	0.157435	0.191731	0.207812	0.240743	0.320191	0.404123	0.466037	0.500386	0.60498	0.720122	0.900005	1.1203	1.339	1.74566	2.73232
0	0	0	0	0	0	0	0	0	0	0	0.087706	0.124165	0.153754	0.157979	0.192847	0.207812	0.241458	0.321602	0.406358	0.469422	0.501306	0.615188	0.720437	0.913017	1.125	1.34398	1.76251	2.73494
0	0	0	0	0	0	0	0	0	0	0.0198472	0.089244	0.124429	0.153971	0.160022	0.19542	0.207812	0.246258	0.32355	0.408832	0.469981	0.503168	0.615792	0.724357	0.95223	1.13156	1.35445	1.78457	2.74159
0	0	0	0	0	0	0	0	0	0	0.0222199	0.0955597	0.125207	0.154526	0.161472	0.195854	0.207812	0.247805	0.32363	0.411691	0.471464	0.508806	0.619371	0.725727	0.957775	1.13614	1.3625	1.79754	2.77325
0	0	0	0	0	0	0	0	0	0	0.0242567	0.0969693	0.125764	0.155653	0.162267	0.196616	0.207812	0.248047	0.325018	0.411786	0.480151	0.510013	0.62293	0.726283	0.960232	1.14532	1.36397	1.82247	2.8462
0	0	0	0	0	0	0	0	0	0	0.0275822	0.100427	0.126418	0.156746	0.163134	0.19673	0.207812	0.248047	0.325716	0.411788	0.481611	0.510053	0.624774	0.728232	0.967952	1.14699	1.3722	1.82658	2.90432
0	0	0	0	0	0	0	0	0	0	0.038324	0.100631	0.126468	0.157011	0.164008	0.196807	0.207812	0.248047	0.327592	0.414402	0.482757	0.512234	0.628277	0.736614	0.979929	1.16603	1.37326	1.83891	2.93996
0	0	0	0	0	0	0	0	0	0	0.0449771	0.102439	0.12747	0.158535	0.164322	0.198849	0.207813	0.248047	0.328717	0.417309	0.483293	0.533439	0.642594	0.744141	0.994066	1.18046	1.3768	1.84064	2.9819
0	0	0	0	0	0	0	0	0	0	0.0461154	0.10272	0.127916	0.160937	0.165324	0.19959	0.208398	0.248047	0.33227	0.423983	0.486386	0.535257	0.646344	0.744141	0.994576	1.18302	1.39584	1.84475	3.02411
0	0	0	0	0	0	0	0	0	0	0.0470945	0.104186	0.129382	0.161126	0.167416	0.200674	0.210262	0.248047	0.333087	0.427457	0.493055	0.537298	0.647004	0.744141	0.995409	1.1838	1.4112	1.84808	3.0278
0	0	0	0	0	0	0	0	0	0	0.0518631	0.104568	0.130573	0.161794	0.172444	0.202128	0.212488	0.248047	0.33553	0.427535	0.495287	0.551447	0.650035	0.74544	0.996346	1.18651	1.41225	1.85939	3.02874
0	0	0	0	0	0	0	0	0	0	0.0533221	0.106697	0.130758	0.161819	0.173727	0.203129	0.218472	0.248047	0.340389	0.428704	0.496094	0.55465	0.6721	0.751142	0.997772	1.19238	1.42435	1.86681	3.08992
0	0	0	0	0	0	0	0	0	0	0.0546393	0.106815	0.132036	0.163891	0.174786	0.204298	0.220691	0.248047	0.344426	0.42872	0.496094	0.564282	0.676921	0.761008	1.0135	1.21897	1.42562	1.86944	3.13731
0	0	0	0	0	0	0	0	0	0	0.055222	0.109031	0.132864	0.164064	0.174797	0.204964	0.221279	0.248047	0.34724	0.43282	0.496094	0.565625	0.678971	0.761123	1.01351	1.22783	1.42945	1.87007	3.18149
0	0	0	0	0	0	0	0	0	0	0.0572313	0.109158	0.134531	0.164886	0.176097	0.207812	0.223482	0.248729	0.347832	0.438322	0.496094	0.567981	0.682742	0.765822	1.02162	1.22987	1.43616	1.87538	3.19566
0	0	0	0	0	0	0	0	0	0	0.0582552	0.111078	0.135747	0.16499	0.176463	0.207812	0.225419	0.249168	0.347865	0.440188	0.500643	0.568662	0.683107	0.768093	1.02177	1.23959	1.45145	1.88907	3.20374
0	0	0	0	0	0	0	0	0	0	0.0593327	0.111213	0.136692	0.165019	0.177188	0.207812	0.225707	0.255885	0.34802	0.444159	0.503086	0.568688	0.684366	0.769398	1.02272	1.24023	1.4727	1.88939	3.20768
0	0	0	0	0	0	0	0	0	0	0.0596701	0.111571	0.136745	0.165684	0.178356	0.207812	0.226908	0.25902	0.349183	0.444234	0.504955	0.575614	0.686366	0.783782	1.03417	1.24188	1.4792	1.92019	3.22369
0	0	0	0	0	0	0	0	0	0	0.0612402	0.112379	0.137265	0.165923	0.179849	0.207812	0.228449	0.260117	0.350409	0.444266	0.510475	0.577589	0.694651	0.796864	1.04656	1.24385	1.48828	1.92537	3.22461
0	0	0	0	0	0	0	0	0	0	0.0629063	0.112827	0.137445	0.166237	0.181353	0.207812	0.23044	0.263061	0.350791	0.444281	0.515852	0.578498	0.698416	0.805008	1.05237	1.24738	1.50055	1.92855	3.22461
0	0	0	0	0	0	0	0	0	0	0.0641705	0.113096	0.138378	0.167609	0.181592	0.207812	0.232739	0.263356	0.35192	0.444691	0.518159	0.582775	0.701583	0.808698	1.06508	1.25819	1.50055	1.97229	3.26549
0	0	0	0	0	0	0	0	0	0	0.0643761	0.114298	0.139949	0.168882	0.18231	0.207812	0.233144	0.263917	0.356071	0.446876	0.520344	0.584398	0.701962	0.81164	1.07163	1.25853	1.50166	1.97747	3.28708
0	0	0	0	0	0	0	0	0	0	0.0667123	0.114532	0.140229	0.169163	0.182489	0.207812	0.233409	0.265043	0.356783	0.447496	0.521738	0.585354	0.702825	0.814867	1.08107	1.2607	1.5041	1.98283	3.31887
0	0	0	0	0	0	0	0	0	0	0.0672345	0.115153	0.141005	0.169307	0.183121	0.20817	0.233548	0.266383	0.360562	0.44808	0.530297	0.587508	0.706799	0.8199	1.0868	1.26171	1.51505	1.98438	3.32591
0	0	0	0	0	0	0	0	0	0	0.0683022	0.117062	0.14129	0.170411	0.184492	0.209518	0.23436	0.270195	0.362403	0.448229	0.536993	0.587532	0.71166	0.833145	1.09085	1.2648	1.52347	1.98459	3.33346
0	0	0	0	0	0	0	0	0	0.00248609	0.0685092	0.117271	0.141343	0.172725	0.184733	0.209976	0.235889	0.273749	0.364874	0.449807	0.538334	0.597041	0.71266	0.839958	1.09705	1.2648	1.53553	2.004	3.41744
0	0	0	0	0	0	0	0	0	0.0105683	0.07076	0.117742	0.142775	0.173222	0.186149	0.211069	0.237063	0.276859	0.366472	0.451172	0.538971	0.599219	0.715465	0.869045	1.09735	1.27155	1.54176	2.00976	3.44819
0	0	0	0	0	0	0	0	0	0.0147374	0.0714719	0.118268	0.142919	0.174823	0.186551	0.211313	0.237216	0.277858	0.366808	0.453579	0.53958	0.601268	0.717954	0.869556	1.10786	1.27395	1.54369	2.01347	3.45489
0	0	0	0	0	0	0	0	0	0.0171278	0.0730539	0.119618	0.142981	0.176281	0.186592	0.212724	0.239633	0.277875	0.366914	0.459572	0.539979	0.605064	0.73105	0.871018	1.1093	1.28109	1.55292	2.01533	3.45489
0	0	0	0	0	0	0	0	0	0.0190238	0.0770823	0.120627	0.14399	0.17651	0.187815	0.213376	0.239855	0.278588	0.367524	0.459612	0.540599	0.605224	0.73361	0.877486	1.11399	1.28113	1.55448	2.02471	3.45489
0	0	0	0	0	0	0	0	0	0.0243494	0.077443	0.120872	0.144009	0.176869	0.187827	0.214431	0.241129	0.279009	0.371806	0.459754	0.540699	0.605297	0.734876	0.883373	1.11708	1.28984	1.55546	2.02983	3.46341
0	0	0	0	0	0	0	0	0	0.026641	0.07762	0.121149	0.144808	0.178506	0.190574	0.216182	0.242473	0.285915	0.372092	0.460784	0.544304	0.611562	0.738431	0.889277	1.12362	1.29151	1.56271	2.0496	3.47195
0	0	0	0	0	0	0	0	0	0.0279459	0.078502	0.121579	0.146069	0.178675	0.191595	0.217363	0.24383	0.287075	0.374528	0.460894	0.545325	0.616795	0.738808	0.896168	1.12941	1.29738	1.56879	2.05163	3.49895
0	0	0	0	0	0	0	0	0	0.0309835	0.0795378	0.122147	0.147094	0.179158	0.192046	0.217435	0.246242	0.28803	0.377388	0.46212	0.545569	0.618699	0.744141	0.896974	1.13165	1.30477	1.57566	2.05447	3.50392
0	0	0	0	0	0	0	0	0	0.0320463	0.0824778	0.124116	0.149217	0.181236	0.192526	0.218288	0.247056	0.288628	0.37755	0.462656	0.548303	0.618928	0.744141	0.903417	1.13305	1.31601	1.57942	2.06875	3.59491
0	0	0	0	0	0	0	0	0	0.034335	0.085458	0.12493	0.149287	0.18334	0.192582	0.218537	0.247342	0.289675	0.377827	0.466297	0.552066	0.619699	0.744141	0.905684	1.13371	1.32243	1.58442	2.09564	3.6526
0	0	0	0	0	0	0	0	0	0.0346626	0.0856426	0.126425	0.149372	0.184017	0.194698	0.219438	0.248047	0.291826	0.378097	0.466661	0.552345	0.634773	0.744672	0.906536	1.14162	1.33117	1.58467	2.10878	3.66428
0	0	0	0	0	0	0	0	0	0.0354224	0.0862766	0.129001	0.149633	0.184841	0.194763	0.219559	0.248047	0.292971	0.379628	0.467191	0.554758	0.637659	0.747857	0.907516	1.1564	1.33422	1.59332	2.11931	3.71434
0	0	0	0	0	0	0	0	0	0.0394938	0.0878849	0.12959	0.15028	0.187147	0.196393	0.219713	0.248047	0.293515	0.38048	0.47047	0.562878	0.638249	0.7482	0.910134	1.15967	1.33577	1.60031	2.12853	3.71767
0	0	0	0	0	0	0	0	0	0.0395753	0.0880061	0.12999	0.151739	0.187485	0.203528	0.220408	0.248047	0.293891	0.381857	0.472254	0.56521	0.638971	0.748327	0.922395	1.16602	1.33577	1.60465	2.12945	3.74592
0	0	0	0	0	0	0	0	0	0.0420344	0.089855	0.131732	0.152235	0.187684	0.204035	0.221377	0.248047	0.293891	0.382542	0.473554	0.566862	0.643719	0.758548	0.928273	1.16647	1.34524	1.60476	2.1315	3.79439
0	0	0	0	0	0	0	0	0	0.0428197	0.0909194	0.131773	0.15252	0.190691	0.205915	0.221453	0.248047	0.298604	0.383092	0.474434	0.571913	0.646092	0.761512	0.928767	1.16722	1.34725	1.62518	2.14262	3.88065
0	0	0	0	0	0	0	0	0	0.0456639	0.0931833	0.132582	0.156051	0.191252	0.207	0.222223	0.248047	0.302252	0.383649	0.478869	0.574687	0.658796	0.763242	0.943017	1.16868	1.35605	1.62765	2.15762	3.91155
0	0	0	0	0	0	0	0	0	0.0469377	0.094001	0.133643	0.157029	0.191955	0.207455	0.22261	0.248047	0.305883	0.385471	0.479309	0.57871	0.66094	0.763981	0.946007	1.17857	1.35866	1.63455	2.18335	3.92077
0	0	0	0	0	0	0	0	0	0.0478456	0.0957581	0.134377	0.157878	0.192804	0.207511	0.22351	0.250332	0.309728	0.385795	0.489004	0.580524	0.664704	0.764637	0.955997	1.18531	1.36191	1.63679	2.18945	3.93681
0	0	0	0	0	0	0	0	0	0.0492438	0.0957898	0.134935	0.158434	0.192905	0.207812	0.223738	0.254141	0.310024	0.388268	0.49426	0.587916	0.665466	0.764645	0.962396	1.18861	1.3672	1.65262	2.20472	3.95002
0	0	0	0	0	0	0	0	0.00682129	0.0498281	0.0959198	0.135082	0.158938	0.193944	0.207812	0.225005	0.256528	0.310156	0.391964	0.496012	0.588793	0.668124	0.765747	0.966378	1.19577	1.36906	1.66395	2.20749	3.97419
0	0	0	0	0	0	0	0	0.0113215	0.0512679	0.097078	0.135153	0.161019	0.194936	0.207812	0.225968	0.25715	0.310156	0.397077	0.496094	0.590032	0.670534	0.769611	0.970493	1.19696	1.3845	1.66991	2.20925	4.03921
0	0	0	0	0	0	0	0	0.0183573	0.053124	0.0985054	0.135399	0.162654	0.195037	0.207812	0.226724	0.258649	0.310156	0.398639	0.496094	0.594385	0.679929	0.780207	0.982618	1.20348	1.38953	1.70075	2.21082	4.05625
0	0	0	0	0	0	0	0	0.0199756	0.0553036	0.0993691	0.135479	0.163797	0.195962	0.207812	0.230384	0.260595	0.310156	0.401514	0.496094	0.595771	0.683752	0.784393	0.992188	1.20477	1.39898	1.70194	2.21153	4.27168
0	0	0	0	0	0	0	0	0.021384	0.0559318	0.0999879	0.138877	0.163875	0.19597	0.207812	0.230591	0.265714	0.310939	0.406304	0.496094	0.603264	0.683994	0.784393	0.992188	1.20942	1.40036	1.71094	2.21839	4.35169
0	0	0	0	0	0	0	0	0.0234511	0.0572818	0.100091	0.139818	0.164945	0.19619	0.207812	0.231105	0.271333	0.313403	0.410905	0.496094	0.60362	0.684215	0.785935	1.00089	1.21164	1.40875	1.71182	2.22356	4.96406
0	0	0	0	0	0	0	0	0.0294748	0.0610435	0.100446	0.140322	0.16515	0.19749	0.207812	0.23204	0.271727	0.317885	0.413023	0.496094	0.60515	0.687046	0.788606	1.00274	1.21773	1.40978	1.71184	2.2284	4.98656
0	0	0	0	0	0	0	0	0.0315322	0.0615178	0.102475	0.140814	0.16595	0.199501	0.207812	0.232453	0.274198	0.318869	0.413313	0.506002	0.605688	0.690766	0.80466	1.01407	1.22685	1.41608	1.72202	2.23091	5.04571
0	0	0	0	0	0	0	0	0.0333045	0.0635315	0.102557	0.141516	0.166422	0.200055	0.207812	0.232746	0.274243	0.319079	0.41378	0.50759	0.612039	0.695796	0.809297	1.02106	1.22719	1.41852	1.72601	2.23207	5.06745
0	0	0	0	0	0	0	0	0.0339932	0.0640826	0.103059	0.141792	0.166541	0.20023	0.207812	0.234487	0.277661	0.321717	0.414049	0.508373	0.613782	0.696029	0.814029	1.02286	1.2365	1.4237	1.72656	2.25002	5.07475
0	0	0	0	0	0	0	0	0.0345394	0.0646324	0.103405	0.142723	0.166741	0.200668	0.207812	0.238178	0.281745	0.322098	0.414849	0.517349	0.614311	0.708463	0.814719	1.02303	1.24604	1.4263	1.72966	2.25898	5.11362
0	0	0	0	0	0	0	0	0.0402397	0.0676754	0.10426	0.14313	0.167226	0.203372	0.207812	0.239076	0.283321	0.32444	0.415057	0.518864	0.616486	0.712079	0.819274	1.0358	1.25283	1.43581	1.73125	2.27548	5.30504
0	0	0	0	0	0	0	0	0.0431903	0.0681417	0.105156	0.143664	0.167731	0.203646	0.207812	0.24089	0.283326	0.325156	0.415625	0.52131	0.616539	0.712327	0.824903	1.05134	1.25614	1.4378	1.73266	2.28578	5.37151
0	0	0	0	0	0	0	0	0.0462707	0.0681533	0.105298	0.144006	0.169006	0.204762	0.207812	0.244795	0.28409	0.325509	0.415625	0.521395	0.622797	0.714199	0.827875	1.0522	1.25985	1.44274	1.73633	2.28688	5.53303
0	0	0	0	0	0	0	0	0.0469422	0.0689428	0.106347	0.14624	0.169816	0.205249	0.207812	0.24571	0.28605	0.328031	0.415625	0.521454	0.623861	0.717741	0.841474	1.05297	1.25998	1.44477	1.73986	2.29841	5.67883
0	0	0	0	0	0	0	0	0.0481588	0.0690058	0.106549	0.146705	0.170229	0.205251	0.207812	0.247488	0.28799	0.328079	0.415625	0.522624	0.62654	0.719091	0.842355	1.05507	1.2648	1.44635	1.76578	2.30412	5.72497
0	0	0	0	0	0	0	0	0.0488656	0.0690583	0.107462	0.146952	0.170832	0.2061	0.207812	0.247622	0.289768	0.328152	0.415741	0.524802	0.637852	0.719424	0.86204	1.06447	1.27001	1.45912	1.78865	2.30429	5.81408
0	0	0	0	0	0	0	0	0.0489403	0.0703204	0.109651	0.148996	0.171013	0.207491	0.207813	0.247922	0.293451	0.329284	0.415871	0.530842	0.638187	0.73011	0.862162	1.08107	1.27107	1.46261	1.78948	2.30767	5.83686
0	0	0	0	0	0	0	0	0.0497994	0.0707726	0.110226	0.149068	0.171394	0.207812	0.208121	0.248047	0.293891	0.329746	0.416227	0.530849	0.642121	0.743933	0.863194	1.08228	1.27197	1.46465	1.79103	2.3254	5.83833
0	0	0	0	0	0	0	0	0.0500294	0.0709627	0.110412	0.15023	0.171486	0.207812	0.208298	0.248047	0.293891	0.330779	0.418327	0.532815	0.643763	0.744141	0.864613	1.08865	1.2728	1.47856	1.79366	2.34402	5.83833
0	0	0	0	0	0	0	0	0.051327	0.0716089	0.111183	0.152062	0.171529	0.207812	0.208882	0.248047	0.293891	0.331211	0.419753	0.540472	0.645427	0.744141	0.868023	1.08893	1.27655	1.47882	1.81223	2.34407	6.08094
0	0	0	0	0	0	0	0	0.0521362	0.071884	0.11129	0.152175	0.173543	0.207812	0.209545	0.248047	0.293891	0.335015	0.420461	0.542387	0.652817	0.744141	0.881919	1.09112	1.28019	1.48828	1.82085	2.34441	6.08094
0	0	0	0	0	0	0	0	0.0540425	0.0719443	0.111581	0.152496	0.173671	0.207812	0.21069	0.248047	0.293891	0.336111	0.4208	0.548593	0.653682	0.753093	0.892963	1.09148	1.28455	1.48828	1.82335	2.34884	6.33658
0	0	0	0	0	0	0	0	0.05407	0.072303	0.111877	0.152508	0.174765	0.207812	0.211741	0.248047	0.293891	0.3367	0.423199	0.552148	0.653696	0.754968	0.893872	1.0923	1.28556	1.48995	1.82843	2.35201	6.68094
0	0	0	0	0	0	0	0	0.0556551	0.072863	0.11233	0.152808	0.174836	0.207812	0.213389	0.248047	0.294291	0.337	0.428138	0.55505	0.656864	0.755684	0.908259	1.10074	1.30518	1.49388	1.83858	2.37958	7.26671
0	0	0	0	0	0	0	0	0.0565923	0.0735146	0.11233	0.152924	0.176268	0.207812	0.213575	0.249243	0.297174	0.337918	0.429153	0.558086	0.658045	0.763732	0.91106	1.10407	1.30886	1.50989	1.84471	2.38146	7.38976
0	0	0	0	0	0	0	0	0.0568994	0.0738458	0.114425	0.153146	0.176665	0.207812	0.213967	0.251316	0.300227	0.341337	0.431079	0.558647	0.659569	0.774959	0.911647	1.10512	1.31834	1.51137	1.85539	2.38779	7.45072
0	0	0	0	0	0	0	0	0.0576102	0.0739173	0.115517	0.153575	0.178038	0.207812	0.21479	0.251352	0.300843	0.342461	0.432753	0.559657	0.660639	0.777196	0.913295	1.1093	1.32539	1.51784	1.86506	2.41743	7.46491
0	0	0	0	0	0	0	0	0.0587574	0.0750887	0.115518	0.154058	0.178939	0.207812	0.216238	0.25197	0.301423	0.342825	0.433593	0.561177	0.668533	0.77959	0.930365	1.11087	1.33373	1.5211	1.8656	2.41922	7.59007
0	0	0	0	0	0	0	0	0.0592766	0.0756873	0.115603	0.154489	0.179812	0.207812	0.218155	0.253883	0.303622	0.345222	0.435405	0.563827	0.670418	0.781117	0.93677	1.11162	1.33577	1.52257	1.8844	2.45072	7.88305
0	0	0	0	0	0	0	0	0.0592994	0.0764296	0.115692	0.156004	0.180091	0.207812	0.21843	0.25466	0.304735	0.345322	0.439713	0.568381	0.670987	0.784073	0.938932	1.11191	1.33577	1.52781	1.88907	2.46287	8.03381
0	0	0	0	0	0	0	0	0.0614591	0.076649	0.115823	0.156761	0.18024	0.207812	0.219121	0.256042	0.306786	0.346538	0.43986	0.570551	0.671176	0.784393	0.940291	1.12169	1.34181	1.53565	1.91533	2.48555	8.07582
0	0	0	0	0	0	0	0	0.0618019	0.0771107	0.117724	0.157197	0.180723	0.207812	0.219749	0.259036	0.308848	0.34668	0.44034	0.570746	0.675182	0.784393	0.941438	1.13264	1.34371	1.54267	1.93291	2.49284	8.27897
0	0	0	0	0	0	0	0	0.0624484	0.0771847	0.118098	0.15756	0.181139	0.207812	0.219964	0.260643	0.310156	0.348171	0.440373	0.573164	0.677469	0.785195	0.94819	1.13843	1.34797	1.54648	1.93401	2.49284	8.29809
0	0	0	0	0	0	0	0	0.0636027	0.0774015	0.120933	0.157914	0.181545	0.207812	0.220302	0.261006	0.310156	0.352445	0.444191	0.57577	0.67785	0.789766	0.951663	1.1418	1.35235	1.55159	1.93571	2.49284	8.38661
0	0	0	0	0	0	0	0	0.0638485	0.0782085	0.12108	0.160791	0.184793	0.207812	0.220404	0.265312	0.310156	0.352477	0.446995	0.578858	0.679297	0.792564	0.952579	1.14597	1.3543	1.55582	1.93937	2.49288	8.84849
0	0	0	0	0	0	0	0	0.0639639	0.0788832	0.121174	0.161156	0.186367	0.207812	0.221599	0.265983	0.310156	0.357375	0.447544	0.581782	0.688726	0.795064	0.953618	1.15036	1.3571	1.55669	1.95638	2.49639	8.8986
0	0	0	0	0	0	0	0.00475351	0.064583	0.0799387	0.122026	0.161288	0.187333	0.207812	0.224256	0.267708	0.310156	0.357463	0.44813	0.582401	0.694654	0.79665	0.959059	1.15664	1.35914	1.5567	1.9589	2.4992	9.03091
0	0	0	0	0	0	0	0.010728	0.0665008	0.07999	0.122412	0.161773	0.187553	0.207812	0.225575	0.267957	0.310156	0.360584	0.448503	0.582531	0.695033	0.798823	0.968239	1.15771	1.36282	1.56627	1.96041	2.49921	9.04788
0	0	0	0	0	0	0	0.0155153	0.0671603	0.0821238	0.124489	0.161974	0.187785	0.207812	0.226393	0.268008	0.310156	0.361423	0.450893	0.586222	0.700781	0.799983	0.969815	1.1599	1.36295	1.56718	1.96157	2.50853	9.09547
0	0	0	0	0	0	0	0.0164001	0.0673326	0.0842449	0.124624	0.162584	0.188526	0.207812	0.226512	0.269832	0.310837	0.36173	0.451039	0.592715	0.701583	0.800164	0.97358	1.16284	1.3631	1.57104	1.96335	2.5158	9.20413
0	0	0	0	0	0	0	0.0183176	0.0673612	0.08585	0.126096	0.162897	0.189221	0.207812	0.227354	0.27012	0.312168	0.365521	0.458931	0.593071	0.707837	0.80117	0.973666	1.17108	1.36515	1.57946	1.96725	2.52622	9.27032
0	0	0	0	0	0	0	0.0210424	0.0683198	0.0875258	0.126448	0.164545	0.18958	0.207812	0.227868	0.271161	0.31251	0.367121	0.460155	0.599483	0.711415	0.804122	0.974533	1.17344	1.37395	1.58827	1.97276	2.53161	9.87236
0	0	0	0	0	0	0	0.0218638	0.0693566	0.0884079	0.128941	0.164557	0.190354	0.207812	0.228074	0.272378	0.312511	0.370854	0.461097	0.604505	0.712085	0.804434	0.977749	1.1738	1.37402	1.58827	1.98992	2.53188	10.0769
0	0	0	0	0	0	0	0.0228368	0.0707608	0.0885101	0.128984	0.165208	0.190472	0.207812	0.228656	0.274816	0.315153	0.37256	0.461897	0.604565	0.712803	0.808204	0.979395	1.18168	1.3743	1.58852	1.99542	2.54008	10.2423
0	0	0	0	0	0	0	0.025838	0.0709406	0.0893771	0.129014	0.166037	0.190658	0.207812	0.228931	0.278633	0.31533	0.375112	0.464683	0.605705	0.716666	0.812869	0.980772	1.18258	1.37785	1.59095	1.99971	2.54142	10.3155
0	0	0	0	0	0	0	0.0285211	0.0717001	0.0908923	0.129606	0.166125	0.191285	0.207813	0.230182	0.279547	0.319827	0.375214	0.466054	0.611581	0.721875	0.815919	0.980844	1.18378	1.3794	1.59399	2.00817	2.56108	25.9075
0	0	0	0	0	0	0	0.030828	0.0725788	0.0910011	0.130997	0.166337	0.192137	0.208337	0.231817	0.279557	0.321456	0.376576	0.470928	0.61469	0.722872	0.818212	0.985278	1.18486	1.38427	1.60081	2.0105	2.56981	26.4609
0	0	0	0	0	0	0	0.0313082	0.0732507	0.0913447	0.131899	0.168221	0.19411	0.208385	0.233823	0.281826	0.323629	0.377447	0.47121	0.616271	0.731333	0.832633	0.989553	1.1872	1.39111	1.61329	2.01634	2.57253	26.5514
0	0	0	0	0	0	0	0.0323948	0.0743969	0.0921245	0.131925	0.169085	0.194872	0.208486	0.23558	0.282516	0.324044	0.378118	0.477383	0.616571	0.735549	0.838151	0.992188	1.18901	1.39223	1.61344	2.02098	2.58969	26.6751
0	0	0	0	0	0	0	0.0343124	0.0754145	0.0925507	0.131953	0.17111	0.195977	0.209689	0.23558	0.282593	0.324979	0.37813	0.478147	0.623272	0.744078	0.847743	0.992188	1.19017	1.39301	1.62602	2.02681	2.59688
0	0	0	0	0	0	0	0.0343906	0.0764014	0.0932317	0.132916	0.171151	0.196577	0.210968	0.235605	0.283966	0.325087	0.38158	0.486518	0.624221	0.744141	0.849217	0.993254	1.19219	1.39431	1.63898	2.02994	2.60704
0	0	0	0	0	0	0	0.0347697	0.0767737	0.0946718	0.133505	0.172538	0.197731	0.214474	0.238009	0.285308	0.325208	0.382373	0.489629	0.625522	0.744141	0.849544	0.993913	1.19645	1.3973	1.64124	2.03207	2.60769
0	0	0	0	0	0	0	0.0384353	0.0767956	0.0959703	0.133989	0.173766	0.198984	0.214623	0.2386	0.285897	0.325672	0.383368	0.489747	0.627226	0.744141	0.856826	1.01619	1.21061	1.39933	1.64127	2.03395	2.62941
0	0	0	0	0	0	0	0.0391698	0.0775392	0.0970077	0.134677	0.175037	0.199332	0.214767	0.238711	0.286128	0.325749	0.383454	0.492478	0.627487	0.744513	0.856945	1.0194	1.21065	1.40137	1.64691	2.04431	2.63121
0	0	0	0	0	0	0	0.0401144	0.0777871	0.0973595	0.13501	0.175508	0.203014	0.215193	0.239657	0.286374	0.327767	0.383873	0.492727	0.629039	0.749399	0.857597	1.01987	1.21092	1.40317	1.65295	2.05046	2.6435
0	0	0	0	0	0	0	0.0402139	0.0790298	0.0979061	0.136246	0.176037	0.205221	0.215228	0.241022	0.286572	0.329253	0.386887	0.496094	0.630197	0.751304	0.868019	1.02272	1.2164	1.40317	1.66395	2.05062	2.65128
0	0	0	0	0	0	0	0.041758	0.0796323	0.0982304	0.136294	0.17834	0.20694	0.216059	0.243599	0.28674	0.332013	0.387296	0.496094	0.631596	0.75369	0.876719	1.02813	1.22606	1.40476	1.66493	2.05959	2.67534
0	0	0	0	0	0	0	0.0448195	0.0804136	0.098285	0.137259	0.178935	0.207162	0.216229	0.244384	0.286936	0.33332	0.388677	0.496094	0.63361	0.755906	0.877801	1.03869	1.23184	1.41088	1.66959	2.06337	2.68069
0	0	0	0	0	0	0	0.0448893	0.0806862	0.0983363	0.138725	0.179417	0.207812	0.217293	0.244896	0.288874	0.337575	0.389159	0.496094	0.635022	0.756125	0.88131	1.04286	1.23421	1.41171	1.6708	2.06627	2.7197
0	0	0	0	0	0	0	0.0454537	0.0808558	0.0995347	0.139888	0.181025	0.207812	0.218657	0.247681	0.290121	0.33758	0.389217	0.496094	0.637981	0.759194	0.881336	1.04787	1.23975	1.41758	1.67499	2.06678	2.76635
0	0	0	0	0	0	0	0.0456575	0.0810471	0.0996544	0.141824	0.182486	0.207812	0.219422	0.248047	0.293402	0.339185	0.389268	0.496867	0.638852	0.76125	0.882609	1.05454	1.23983	1.42145	1.67585	2.07513	2.77325
0	0	0	0	0	0	0	0.0457117	0.0813178	0.099983	0.141903	0.182527	0.207812	0.220494	0.248047	0.293891	0.339199	0.391216	0.49882	0.639129	0.763254	0.88793	1.05861	1.24023	1.42287	1.67841	2.08032	2.77325
0	0	0	0	0	0	0	0.0467555	0.0815891	0.100716	0.142525	0.183312	0.207812	0.222376	0.248047	0.293891	0.340444	0.39162	0.499653	0.641672	0.767115	0.894465	1.06094	1.24023	1.43011	1.68417	2.08475	2.77325
0	0	0	0	0	0	0	0.0484017	0.0825874	0.102258	0.142874	0.18399	0.207812	0.22286	0.248047	0.293891	0.340738	0.391644	0.502768	0.642307	0.769718	0.898318	1.07142	1.24023	1.43084	1.70213	2.08855	2.77325
0	0	0	0	0	0	0	0.0485678	0.0829255	0.103478	0.14313	0.184525	0.207812	0.224093	0.248047	0.293891	0.34078	0.391885	0.504933	0.643855	0.770266	0.899984	1.07226	1.24566	1.43235	1.70326	2.09063	2.77846
0	0	0	0	0	0	0	0.0499621	0.0834789	0.104514	0.143371	0.184699	0.207812	0.224447	0.248047	0.296197	0.340797	0.392097	0.507434	0.64431	0.77136	0.90187	1.07409	1.24765	1.43425	1.70583	2.0952	2.79662
0	0	0	0	0	0	0	0.0506401	0.0853989	0.104634	0.144842	0.184956	0.207812	0.227582	0.248047	0.296786	0.341335	0.392687	0.509216	0.645849	0.772592	0.901956	1.0762	1.24788	1.43454	1.70789	2.09583	2.81332
0	0	0	0	0	0	0	0.0512145	0.0862625	0.104768	0.145065	0.185304	0.207812	0.227903	0.248047	0.299288	0.342061	0.394295	0.511011	0.64585	0.772801	0.904504	1.07677	1.25437	1.43867	1.70966	2.09723	2.85638
0	0	0	0	0	0	0	0.0543504	0.0873503	0.105383	0.146715	0.185784	0.207812	0.22794	0.248047	0.299962	0.344858	0.394592	0.513386	0.646243	0.776658	0.913935	1.08047	1.25565	1.43918	1.71675	2.10189	2.89072
0	0	0	0	0	0	0	0.0554734	0.0889546	0.105742	0.147182	0.186955	0.207812	0.229624	0.248047	0.3009	0.344899	0.395512	0.513657	0.648175	0.777537	0.915479	1.08402	1.2648	1.44321	1.71757	2.10275	2.90966
0	0	0	0	0	0	0	0.0563207	0.0889658	0.106498	0.14729	0.187294	0.207812	0.231072	0.248047	0.300998	0.346589	0.399814	0.515073	0.648821	0.784393	0.915784	1.09381	1.26892	1.44635	1.71994	2.1089	2.93639
0	0	0	0	0	0	0	0.0566015	0.0899327	0.107886	0.147303	0.18738	0.207812	0.231313	0.248047	0.302233	0.34722	0.40129	0.515893	0.650741	0.785823	0.9184	1.09717	1.27707	1.44714	1.7254	2.10913	2.96066
0	0	0	0	0	0	0	0.0580431	0.0907991	0.109069	0.150576	0.188298	0.207812	0.231374	0.248047	0.303617	0.348677	0.401837	0.51608	0.65292	0.793676	0.918802	1.10159	1.28135	1.45149	1.72647	2.11128	2.96676
0	0	0	0	0	0	0	0.0581849	0.0911267	0.109697	0.151191	0.189471	0.207812	0.231437	0.248047	0.304147	0.349879	0.402066	0.521316	0.654212	0.794329	0.922007	1.10324	1.29124	1.45311	1.73524	2.11742	2.98931
0	0	0	0	0	0	0	0.0582605	0.0911848	0.110479	0.151461	0.189766	0.207812	0.233386	0.248515	0.305713	0.350779	0.404018	0.522546	0.654224	0.801182	0.934645	1.10856	1.29282	1.45421	1.73543	2.11931	2.99716
0	0	0	0	0	0	0	0.0583182	0.0918652	0.110846	0.152782	0.190175	0.207812	0.236737	0.248714	0.307942	0.351852	0.406681	0.522749	0.657271	0.802224	0.9402	1.1093	1.29377	1.46262	1.73633	2.11931	2.99914
0	0	0	0	0	0	0	0.0584408	0.0932792	0.1109	0.152842	0.192128	0.207812	0.237536	0.250121	0.309272	0.352872	0.408191	0.523477	0.658051	0.804114	0.945977	1.11367	1.29469	1.46497	1.73633	2.12995	3.05936
0	0	0	0	0	0	0	0.0584484	0.0935006	0.111132	0.153014	0.192159	0.207812	0.238202	0.250304	0.309726	0.353459	0.413629	0.52376	0.660771	0.812367	0.946195	1.11894	1.30383	1.46982	1.73879	2.13361	3.06187
0	0	0	0	0	0	0	0.0609064	0.093812	0.111758	0.153019	0.192323	0.207812	0.239102	0.250742	0.310156	0.353851	0.413646	0.525414	0.663832	0.819297	0.950344	1.12412	1.30468	1.47154	1.7438	2.13769	3.06285
0	0	0	0	0	0	0	0.0610665	0.0946339	0.113141	0.153374	0.193169	0.207812	0.240436	0.250893	0.310156	0.355699	0.413743	0.526165	0.672753	0.825077	0.952163	1.13177	1.30755	1.47286	1.75765	2.14315	3.06584
0	0	0	0	0	0	0	0.0623784	0.0951766	0.116268	0.1536	0.193173	0.207812	0.241922	0.251024	0.310156	0.356657	0.414774	0.52957	0.673636	0.826051	0.95354	1.13664	1.3076	1.47715	1.76389	2.14562	3.07708
0	0	0	0	0	0	0	0.0628348	0.0960174	0.116547	0.1539	0.196408	0.207812	0.243061	0.251415	0.310156	0.358637	0.415625	0.529919	0.674897	0.827688	0.954542	1.14973	1.31112	1.47743	1.76416	2.14819	3.08176
0	0	0	0	0	0	0	0.0630683	0.0960391	0.117326	0.154286	0.196744	0.207812	0.243899	0.251584	0.310156	0.359116	0.415625	0.53155	0.678568	0.829136	0.955431	1.1571	1.31326	1.47909	1.77279	2.15211	3.08446
0	0	0	0	0	0	0	0.0635315	0.0965428	0.119665	0.154838	0.197328	0.207812	0.243996	0.251592	0.310156	0.359123	0.415625	0.532721	0.682766	0.83019	0.957895	1.16354	1.31434	1.47964	1.78869	2.1524	3.09746
0	0	0	0	0	0	0	0.0643621	0.0967701	0.120358	0.15568	0.197598	0.207812	0.24512	0.253047	0.310156	0.359143	0.415625	0.533933	0.686132	0.835744	0.959459	1.16535	1.31629	1.48398	1.79382	2.15509	3.09758
0	0	0	0	0	0	0	0.0648029	0.0977484	0.120403	0.156114	0.198107	0.207812	0.245523	0.253129	0.310156	0.360688	0.418573	0.535357	0.68793	0.839139	0.965382	1.16616	1.31744	1.48583	1.79573	2.15524	3.09865
0	0	0	0	0	0	0	0.0648238	0.0986937	0.120598	0.156523	0.198807	0.207812	0.245814	0.253373	0.310156	0.362404	0.419152	0.536282	0.690002	0.841476	0.971371	1.17351	1.31856	1.48828	1.80021	2.15664	3.10147
0	0	0	0	0	0	0	0.0654762	0.0990318	0.121317	0.158065	0.200053	0.207812	0.24593	0.253445	0.310156	0.362406	0.41959	0.536424	0.691303	0.842897	0.978751	1.17449	1.32491	1.49103	1.80101	2.15921	3.13011
0	0	0	0	0	0	0	0.066951	0.0991009	0.122478	0.158552	0.201143	0.207813	0.247782	0.256337	0.310156	0.364259	0.419728	0.538865	0.692081	0.843864	0.992188	1.17874	1.32825	1.49294	1.80386	2.17395	3.13513
0	0	0	0	0	0	0	0.0671064	0.100273	0.122589	0.160383	0.201657	0.207813	0.248047	0.257664	0.31077	0.36613	0.421267	0.541894	0.692464	0.847234	0.992188	1.18009	1.32925	1.49878	1.80485	2.17402	3.13816
0	0	0	0	0	0	0.0187772	0.0671345	0.100296	0.122602	0.160756	0.202538	0.207813	0.248047	0.258058	0.311601	0.372965	0.421565	0.541906	0.692966	0.848006	0.998849	1.18187	1.33064	1.49975	1.81093	2.17567	3.22369
0	0	0	0	0	0	0.018807	0.0673761	0.100529	0.123045	0.160907	0.203224	0.208952	0.248047	0.258631	0.312264	0.373465	0.425602	0.542516	0.695994	0.848569	1.0032	1.18191	1.33577	1.50066	1.81174	2.18066	3.22461
0	0	0	0	0	0	0.0188758	0.0686096	0.100649	0.123114	0.161157	0.204898	0.209599	0.248047	0.258937	0.314054	0.37463	0.42699	0.543286	0.699695	0.850378	1.00468	1.18195	1.33577	1.50528	1.81809	2.18375	3.22461
0	0	0	0	0	0	0.0210043	0.0696621	0.101125	0.124472	0.161418	0.20559	0.209802	0.248047	0.259476	0.316714	0.375836	0.427891	0.545156	0.701164	0.861154	1.0061	1.18283	1.33577	1.5081	1.8191	2.1853	3.22789
0	0	0	0	0	0	0.0210598	0.0699247	0.101745	0.124717	0.162134	0.206461	0.211764	0.248047	0.259726	0.316756	0.375955	0.427996	0.545785	0.703156	0.86134	1.00737	1.18522	1.33608	1.51645	1.82052	2.18637	3.23415
0	0	0	0	0	0	0.0219465	0.0700008	0.101972	0.125509	0.162329	0.206607	0.212146	0.248047	0.260523	0.31735	0.376804	0.434157	0.547038	0.70334	0.864581	1.00865	1.18685	1.34248	1.51787	1.82467	2.18962	3.321
0	0	0	0	0	0	0.0220541	0.070346	0.102328	0.125958	0.163258	0.206989	0.212384	0.248047	0.262009	0.317763	0.377035	0.43516	0.549382	0.706487	0.868434	1.01624	1.18879	1.34478	1.52055	1.84493	2.19811	3.35253
0	0	0	0	0	0	0.022746	0.0706157	0.102619	0.12602	0.165023	0.207298	0.212519	0.248047	0.262384	0.317772	0.378212	0.435934	0.554179	0.709124	0.869486	1.01748	1.19397	1.34666	1.53056	1.84784	2.20045	3.3593
0	0	0	0	0	0	0.0278214	0.0710267	0.103097	0.126214	0.16566	0.207812	0.213144	0.248047	0.262511	0.319748	0.37853	0.43679	0.55465	0.710018	0.872124	1.0227	1.20565	1.34744	1.53265	1.84956	2.21141	3.37119
0	0	0	0	0	0	0.0282843	0.0720458	0.103134	0.126892	0.165908	0.207812	0.213552	0.248047	0.262898	0.321882	0.383084	0.438627	0.556971	0.713394	0.873219	1.02272	1.20625	1.35032	1.53265	1.87065	2.21241	3.37191
0	0	0	0	0	0	0.0284403	0.0724435	0.103862	0.12936	0.166976	0.207812	0.214128	0.248047	0.263392	0.323326	0.383322	0.438627	0.557867	0.717464	0.879622	1.02461	1.21412	1.35706	1.53351	1.87413	2.22587	3.39372
0	0	0	0	0	0	0.0284428	0.0732407	0.104834	0.131185	0.167068	0.207812	0.214312	0.248047	0.263525	0.323544	0.383894	0.439825	0.559389	0.717568	0.882925	1.02622	1.21452	1.35717	1.53456	1.88469	2.23017	3.40554
0	0	0	0	0	0	0.0289449	0.0745132	0.105264	0.131515	0.167861	0.207812	0.214451	0.248047	0.263683	0.327719	0.384277	0.442144	0.559966	0.723052	0.884621	1.02654	1.21531	1.36216	1.54145	1.88758	2.23397	3.42249
0	0	0	0	0	0	0.030818	0.0748504	0.105353	0.131684	0.168978	0.207812	0.215047	0.248047	0.264552	0.328481	0.386137	0.443469	0.560887	0.729032	0.887146	1.03176	1.21732	1.36543	1.55451	1.88852	2.23927	3.45079
0	0	0	0	0	0	0.0321375	0.0754432	0.106265	0.131948	0.17084	0.207812	0.217882	0.248047	0.266763	0.330615	0.386726	0.44409	0.562305	0.729207	0.888156	1.03218	1.21775	1.36547	1.56026	1.88907	2.245	3.50002
0	0	0	0	0	0	0.0338702	0.0758076	0.106536	0.132588	0.17466	0.207812	0.21836	0.248047	0.268391	0.333913	0.387234	0.447847	0.564379	0.729546	0.892454	1.03504	1.22832	1.3702	1.5612	1.89955	2.24871	3.54072
0	0	0	0	0	0	0.0338793	0.0760983	0.106723	0.132601	0.1754	0.207812	0.219422	0.249301	0.268796	0.334152	0.387359	0.451427	0.56553	0.732415	0.894098	1.0358	1.2294	1.37179	1.56238	1.90167	2.25485	3.5437
0	0	0	0	0	0	0.035482	0.0773468	0.106809	0.132793	0.175592	0.207812	0.220291	0.249336	0.268897	0.335127	0.389545	0.451959	0.568893	0.73296	0.894346	1.0362	1.23476	1.37522	1.56812	1.90233	2.25873	3.54994
0	0	0	0	0	0	0.0355409	0.0775016	0.106937	0.133809	0.175804	0.207812	0.221465	0.249798	0.269274	0.335606	0.394193	0.454058	0.571581	0.735068	0.895773	1.04095	1.23494	1.37624	1.56879	1.90233	2.26614	3.55978
0	0	0	0	0	0	0.0360968	0.0779541	0.106945	0.134449	0.176334	0.207812	0.222149	0.251285	0.27104	0.337289	0.394684	0.454438	0.573613	0.738477	0.897769	1.04336	1.23555	1.37948	1.56885	1.9065	2.26783	3.60969
0	0	0	0	0	0	0.037387	0.078332	0.107551	0.135968	0.176437	0.207812	0.224728	0.254036	0.271452	0.339557	0.395585	0.457012	0.574011	0.739491	0.89825	1.05801	1.23732	1.38349	1.57109	1.91287	2.26962	3.62894
0	0	0	0	0	0	0.039677	0.0786408	0.107707	0.13623	0.17994	0.207812	0.224802	0.254291	0.273603	0.340516	0.396013	0.458412	0.577441	0.740279	0.902141	1.06095	1.23964	1.38511	1.58306	1.92065	2.27211	3.63346
0	0	0	0	0	0	0.0399553	0.0788886	0.108192	0.136897	0.180066	0.207812	0.226176	0.255474	0.27549	0.340538	0.397018	0.459761	0.577724	0.74169	0.902853	1.07074	1.24023	1.38954	1.58634	1.92318	2.28006	3.64915
0	0	0	0	0	0	0.0432183	0.0793861	0.108679	0.137035	0.180068	0.207812	0.226681	0.257313	0.278211	0.340727	0.397588	0.462056	0.579026	0.744141	0.909062	1.07581	1.24023	1.3954	1.58827	1.92921	2.28688	3.68868
0	0	0	0	0	0	0.0443361	0.0802192	0.109219	0.13752	0.180435	0.207812	0.226705	0.258347	0.278566	0.341761	0.398205	0.463065	0.581736	0.744141	0.910205	1.08939	1.24117	1.39659	1.58827	1.92994	2.30636	3.69325
0	0	0	0	0	0	0.044364	0.0805033	0.109477	0.138193	0.18166	0.207812	0.226896	0.258684	0.278769	0.342888	0.398903	0.465655	0.586191	0.744141	0.910581	1.09028	1.24124	1.39751	1.58827	1.93204	2.31034	3.72914
0	0	0	0	0	0	0.0447663	0.0815759	0.1095	0.138933	0.182592	0.207812	0.227437	0.258772	0.279483	0.346722	0.399186	0.466902	0.587071	0.744141	0.911572	1.09059	1.24184	1.3992	1.58827	1.93464	2.31139	3.76115
0	0	0	0	0	0	0.0460067	0.0820858	0.110127	0.139135	0.182782	0.207812	0.228133	0.258947	0.279967	0.346994	0.400754	0.468209	0.587507	0.744141	0.914853	1.09182	1.24248	1.40302	1.60663	1.93543	2.33494	3.76602
0	0	0	0	0	0	0.0461133	0.0834896	0.110696	0.141114	0.182962	0.207812	0.228941	0.259044	0.280523	0.34781	0.401344	0.468292	0.587888	0.744326	0.918591	1.09326	1.24636	1.40317	1.6108	1.94189	2.34222	3.78155
0	0	0	0	0	0.0115425	0.0480834	0.0842217	0.112048	0.141343	0.183649	0.207812	0.229322	0.26049	0.282745	0.348142	0.403666	0.468441	0.589305	0.748858	0.920866	1.09482	1.24833	1.40317	1.61797	1.94694	2.35141	3.79439
0	0	0	0	0	0.0120443	0.0486058	0.0849863	0.11281	0.1427	0.185143	0.207812	0.229921	0.261862	0.283715	0.348259	0.404363	0.471121	0.591383	0.749238	0.924919	1.09523	1.25483	1.40462	1.61851	1.94712	2.35401	3.80038
0	0	0	0	0	0.0133122	0.0496468	0.0856005	0.113453	0.142729	0.185149	0.207812	0.230256	0.262054	0.284949	0.348873	0.405568	0.474989	0.59435	0.750445	0.930446	1.09994	1.25667	1.40587	1.62577	1.95192	2.3582	3.81023
0	0	0	0	0	0.013781	0.0508744	0.0870042	0.113493	0.14276	0.186016	0.207812	0.231856	0.262213	0.285976	0.350376	0.406167	0.475422	0.594826	0.75152	0.94161	1.10228	1.25873	1.40587	1.62815	1.95485	2.36278	3.81931
0	0	0	0	0	0.0156319	0.0511283	0.0875541	0.113589	0.142879	0.186156	0.207812	0.232153	0.26262	0.287532	0.350803	0.406177	0.477052	0.594874	0.753556	0.944514	1.10424	1.26189	1.40612	1.6375	1.9571	2.3786	3.89472
0	0	0	0	0	0.0173123	0.0515149	0.0877593	0.113912	0.143378	0.186445	0.207812	0.233075	0.262698	0.290555	0.351781	0.407871	0.477385	0.5954	0.753834	0.944882	1.1076	1.2648	1.40891	1.63825	1.96052	2.39599	3.95773
0	0	0	0	0	0.0188752	0.0516179	0.0882718	0.114056	0.144197	0.186457	0.207812	0.235357	0.262714	0.291773	0.352991	0.409915	0.477428	0.602936	0.755021	0.945579	1.11583	1.2648	1.41066	1.64479	1.96052	2.40872	4.06093
0	0	0	0	0	0.0227677	0.0531757	0.0885764	0.114811	0.144381	0.187209	0.207812	0.235608	0.263282	0.291895	0.354281	0.409925	0.479163	0.604292	0.760811	0.945771	1.11699	1.27036	1.414	1.64696	1.96052	2.40964	4.08873
0	0	0	0	0	0.0241215	0.0546291	0.0885778	0.114832	0.144446	0.187496	0.207812	0.235824	0.263574	0.293891	0.354542	0.410672	0.48069	0.604684	0.761285	0.946774	1.11743	1.27043	1.41429	1.65533	1.96171	2.41464	4.1382
0	0	0	0	0	0.0255274	0.0548673	0.0894828	0.114857	0.145196	0.188525	0.207812	0.236067	0.264135	0.293891	0.355341	0.412952	0.481231	0.605006	0.762299	0.948505	1.12707	1.27318	1.41524	1.65768	1.96242	2.41464	4.2118
0	0	0	0	0	0.0257708	0.0552222	0.0898984	0.114893	0.145455	0.188667	0.207812	0.236413	0.265607	0.293891	0.355506	0.413185	0.481537	0.605061	0.762871	0.954722	1.12968	1.27343	1.41799	1.66182	1.97474	2.41473	4.27836
0	0	0	0	0	0.0268605	0.0575108	0.0905417	0.115912	0.145652	0.189176	0.207812	0.236823	0.266123	0.293997	0.358078	0.413271	0.484899	0.608393	0.765697	0.959858	1.13629	1.27512	1.42267	1.66395	1.97546	2.41524	4.6339
0	0	0	0	0	0.0271227	0.0598109	0.0910651	0.115942	0.145652	0.189307	0.207812	0.236852	0.266321	0.294624	0.358973	0.415432	0.484943	0.608727	0.766119	0.967098	1.14802	1.27561	1.42471	1.67106	1.97694	2.41652	4.73487
0	0	0	0	0	0.0271671	0.0610166	0.0919925	0.116749	0.145987	0.189355	0.207812	0.237362	0.266617	0.296267	0.359301	0.41546	0.485452	0.61035	0.775391	0.971486	1.15095	1.2819	1.42584	1.69211	1.97868	2.42782	4.75216
0	0	0	0	0	0.0272088	0.0620097	0.0920112	0.116858	0.146461	0.189815	0.207813	0.237382	0.267474	0.296467	0.360157	0.415625	0.487908	0.613754	0.777481	0.972855	1.15775	1.28277	1.43205	1.69329	1.98438	2.44106	4.8348
0	0	0	0	0	0.0272818	0.0642154	0.0923013	0.116861	0.147529	0.190121	0.207813	0.239253	0.268398	0.296557	0.360832	0.415625	0.48812	0.614628	0.778579	0.973126	1.16178	1.28413	1.43661	1.69533	1.98438	2.45643	4.92758
0	0	0	0	0	0.0279713	0.065031	0.0923329	0.117152	0.147757	0.190276	0.208296	0.239256	0.268444	0.297212	0.361355	0.415625	0.492132	0.615102	0.778891	0.97947	1.16631	1.28633	1.4464	1.69904	1.98698	2.46259	4.93963
0	0	0	0	0	0.0285443	0.0652202	0.0925389	0.118632	0.148512	0.191073	0.208408	0.240024	0.26927	0.297849	0.362774	0.415625	0.492455	0.617025	0.781432	0.984648	1.16651	1.28904	1.44849	1.69907	1.99	2.46496	4.9404
0	0	0	0	0	0.0289364	0.0654253	0.0950183	0.118774	0.148568	0.191652	0.209078	0.240468	0.269506	0.298003	0.363796	0.415625	0.492983	0.617174	0.784393	0.984732	1.16865	1.29158	1.44867	1.70102	1.99126	2.46824	4.96687
0	0	0	0	0	0.029398	0.0668135	0.0951228	0.119376	0.148956	0.192266	0.209169	0.241366	0.270844	0.298378	0.364041	0.415625	0.493349	0.620312	0.784393	0.988315	1.17288	1.29242	1.45223	1.70523	1.99509	2.48377	4.98466
0	0	0	0	0	0.0310329	0.0680037	0.095718	0.121087	0.149371	0.192338	0.209497	0.24137	0.273121	0.301172	0.365035	0.415625	0.494723	0.620312	0.786348	0.989218	1.17552	1.2975	1.45686	1.70588	2.00064	2.48972	5.03615
0	0	0	0	0	0.0316462	0.0688103	0.0958056	0.121969	0.150396	0.193072	0.209812	0.244836	0.273974	0.302253	0.366306	0.415625	0.494802	0.620313	0.786504	0.992188	1.17632	1.29839	1.46766	1.70895	2.00123	2.49284	5.04571
0	0	0	0	0	0.0316823	0.0702741	0.0959825	0.122404	0.152162	0.193438	0.210887	0.245156	0.274026	0.302432	0.366588	0.417338	0.495002	0.620313	0.792277	0.992188	1.17763	1.30097	1.48828	1.71156	2.00217	2.49284	5.06172
0	0	0	0	0	0.0319099	0.0707724	0.0962672	0.122547	0.153339	0.193476	0.211039	0.245313	0.274853	0.304219	0.367208	0.417946	0.495739	0.621448	0.797218	0.993385	1.18268	1.30141	1.49033	1.71315	2.00582	2.50359	5.06745
0	0	0	0	0	0.0321682	0.0709193	0.0964204	0.124735	0.153672	0.194277	0.211876	0.247235	0.27504	0.304977	0.367851	0.418358	0.496094	0.621487	0.79812	0.994544	1.18331	1.30459	1.49446	1.71351	2.00742	2.51118	5.09816
0	0	0	0	0	0.0325745	0.0711636	0.0966287	0.124814	0.154266	0.19514	0.211964	0.24751	0.27508	0.305262	0.368089	0.418658	0.496094	0.622863	0.79879	0.996084	1.18615	1.30501	1.4959	1.72094	2.02358	2.52538	5.13875
0	0	0	0	0	0.0338677	0.0717714	0.0966455	0.12496	0.154359	0.195455	0.212041	0.248047	0.275338	0.307037	0.368324	0.42025	0.496094	0.623437	0.800851	0.998527	1.19128	1.30902	1.49753	1.72171	2.0236	2.54576	5.17192
0	0	0	0	0	0.0377002	0.0722526	0.0967767	0.125014	0.154721	0.195575	0.212335	0.248047	0.276363	0.307141	0.368544	0.423271	0.496094	0.623438	0.809586	1.00167	1.19539	1.31749	1.52052	1.72488	2.026	2.5538	5.20189
0	0	0	0	0	0.039049	0.0725228	0.0970743	0.125604	0.155224	0.195719	0.212398	0.248047	0.277574	0.309462	0.369253	0.424603	0.496762	0.623438	0.813266	1.00171	1.20225	1.3248	1.52728	1.72596	2.02603	2.5538	5.20935
0	0	0	0	0	0.04041	0.0727231	0.0986386	0.12733	0.156504	0.196065	0.213457	0.248047	0.27804	0.310156	0.370366	0.427287	0.49831	0.623438	0.815507	1.00517	1.20499	1.32612	1.53307	1.73101	2.02618	2.5538	5.4334
0	0	0	0	0	0.0404706	0.0727591	0.100512	0.128081	0.156745	0.196697	0.213514	0.248047	0.279566	0.310156	0.371049	0.427453	0.498962	0.623438	0.819376	1.00781	1.20617	1.32621	1.53591	1.73633	2.02702	2.56006	5.47043
0	0	0	0	0	0.040955	0.0727618	0.100878	0.128161	0.157631	0.197031	0.213688	0.248047	0.279631	0.310156	0.371271	0.427463	0.500044	0.623438	0.821524	1.01008	1.20774	1.33206	1.53604	1.73633	2.02767	2.57634	5.57293
0	0	0	0	0	0.0417324	0.0731217	0.100909	0.128847	0.158687	0.197099	0.213846	0.248047	0.280153	0.310156	0.37149	0.427822	0.500182	0.623438	0.826379	1.01038	1.20919	1.33577	1.53869	1.73674	2.03077	2.58787	5.59619
0	0	0	0	0	0.0420586	0.0731465	0.101083	0.128975	0.158996	0.197311	0.214608	0.248047	0.280898	0.310156	0.37342	0.427994	0.50524	0.623968	0.828821	1.01767	1.2108	1.33577	1.54382	1.73696	2.03102	2.58969	5.59619
0	0	0	0	0	0.0432636	0.0731765	0.102593	0.130382	0.159338	0.197903	0.215107	0.248047	0.281449	0.310156	0.37368	0.429647	0.505686	0.625073	0.830085	1.01951	1.2164	1.33629	1.54507	1.74201	2.03581	2.59075	5.59619
0	0	0	0	0	0.0442318	0.0733146	0.102593	0.130678	0.160606	0.198834	0.216008	0.248047	0.282318	0.310156	0.375425	0.430078	0.50592	0.628247	0.831046	1.02062	1.21998	1.343	1.54603	1.74207	2.04704	2.61426	5.59619
0	0	0	0	0	0.0445142	0.0733668	0.10317	0.131224	0.160878	0.19991	0.216918	0.248047	0.283136	0.310156	0.376262	0.431018	0.508197	0.628354	0.831645	1.02183	1.22285	1.34884	1.54835	1.74772	2.04767	2.62783	5.81183
0	0	0	0	0	0.0454959	0.0734119	0.103747	0.131444	0.161529	0.200174	0.217549	0.248047	0.284549	0.310156	0.376912	0.432607	0.508837	0.632568	0.833347	1.02264	1.22391	1.3534	1.55346	1.74912	2.05889	2.64208	5.83197
0	0	0	0	0	0.0475797	0.0734705	0.10425	0.131642	0.161636	0.200843	0.218664	0.248047	0.285825	0.310156	0.378089	0.432864	0.510739	0.633426	0.834116	1.02272	1.22647	1.35569	1.55698	1.74923	2.06841	2.64904	5.83833
0	0	0	0	0	0.0477409	0.0735314	0.104468	0.131653	0.163024	0.201004	0.219443	0.248047	0.286662	0.310156	0.379063	0.433266	0.512546	0.63345	0.835666	1.03269	1.2276	1.35617	1.5578	1.74964	2.07722	2.65597	5.83833
0	0	0	0	0	0.0477979	0.0735429	0.104864	0.131805	0.163076	0.201393	0.220239	0.248047	0.287898	0.310156	0.379155	0.433605	0.51441	0.636514	0.839067	1.033	1.2285	1.36308	1.56256	1.75396	2.07963	2.67137	5.9042
0	0	0	0	0	0.048645	0.0737262	0.105158	0.131838	0.163807	0.203065	0.221318	0.248047	0.288066	0.310156	0.379455	0.43547	0.517788	0.636982	0.840326	1.0365	1.23097	1.36448	1.56732	1.76113	2.08061	2.67155	5.98657
0	0	0	0	0	0.049708	0.0744469	0.106457	0.132011	0.164007	0.203196	0.221542	0.248592	0.28808	0.310156	0.380351	0.43548	0.520193	0.637452	0.840883	1.04038	1.23306	1.36676	1.58425	1.76142	2.08097	2.68247	6.08094
0	0	0	0	0	0.0497888	0.0749542	0.10651	0.132838	0.164579	0.203252	0.221913	0.249306	0.288585	0.310156	0.380642	0.435966	0.520238	0.637855	0.841484	1.04421	1.23525	1.36765	1.58665	1.76485	2.08241	2.71292	6.09984
0	0	0	0	0	0.0501093	0.0750017	0.106523	0.133704	0.164974	0.203362	0.223184	0.249533	0.289637	0.310156	0.381039	0.436524	0.522027	0.638302	0.841933	1.04885	1.23545	1.3691	1.58827	1.77074	2.0866	2.71927	6.55578
0	0	0	0	0	0.0509005	0.0750701	0.106888	0.134195	0.16632	0.205427	0.224315	0.249961	0.289655	0.310156	0.381643	0.438127	0.523334	0.639496	0.84207	1.05036	1.23556	1.38159	1.5888	1.77487	2.08728	2.75117	6.64954
0	0	0	0	0	0.0510546	0.0751208	0.107211	0.134623	0.166335	0.206366	0.225193	0.251994	0.290704	0.310156	0.381666	0.438627	0.523426	0.639497	0.843633	1.05237	1.23701	1.385	1.59155	1.77524	2.09365	2.75588	6.73848
0	0	0	0	0	0.0511825	0.0752712	0.107233	0.135108	0.166713	0.206489	0.225288	0.252398	0.292239	0.310156	0.381989	0.438627	0.523999	0.640402	0.846344	1.05237	1.23785	1.38717	1.59268	1.77525	2.09503	2.77162	6.86975
0	0	0	0	0	0.0517843	0.075289	0.108949	0.135363	0.167177	0.206543	0.228036	0.252417	0.292989	0.310331	0.382269	0.439158	0.524194	0.641701	0.847372	1.05237	1.23898	1.39181	1.59294	1.78418	2.09748	2.77325	6.93234
0	0	0	0	0	0.0518678	0.0753226	0.109176	0.135484	0.167459	0.206952	0.228636	0.253737	0.293891	0.31288	0.384484	0.440091	0.524254	0.642971	0.848771	1.05237	1.24023	1.3928	1.59309	1.78651	2.10288	2.77325	7.01583
0	0	0	0	0	0.0520114	0.0754752	0.109536	0.135665	0.1678	0.207057	0.229103	0.253993	0.293891	0.314811	0.385869	0.440563	0.525738	0.643157	0.848832	1.05384	1.24323	1.39691	1.59522	1.78905	2.10543	2.77325	7.04971
0	0	0	0	0.00563206	0.0520972	0.0756157	0.109716	0.136248	0.167871	0.207095	0.229107	0.254143	0.293891	0.315844	0.386046	0.442289	0.532204	0.643884	0.849372	1.06062	1.24707	1.39846	1.59783	1.79198	2.11577	2.78027	7.07659
0	0	0	0	0.0118511	0.0521231	0.0756341	0.110194	0.136412	0.168476	0.207581	0.229294	0.254296	0.293891	0.316339	0.386415	0.44276	0.532638	0.648541	0.852917	1.0623	1.24739	1.39944	1.60619	1.79725	2.11931	2.78632	7.11032
0	0	0	0	0.0127277	0.05218	0.0762361	0.111289	0.13689	0.170866	0.207812	0.22949	0.255871	0.293891	0.316581	0.38702	0.44314	0.533709	0.648744	0.855929	1.06635	1.24973	1.40317	1.60634	1.80296	2.12771	2.81314	7.22981
0	0	0	0	0.0135078	0.0524233	0.0763026	0.111396	0.13742	0.171058	0.207812	0.230578	0.256011	0.293891	0.318743	0.388654	0.445223	0.534889	0.648915	0.861462	1.06956	1.25	1.41013	1.60663	1.80303	2.12995	2.82712	7.34571
0	0	0	0	0.0136604	0.0527384	0.0766705	0.112229	0.138898	0.171846	0.207812	0.231726	0.256455	0.293891	0.319914	0.388956	0.446171	0.539861	0.649527	0.865528	1.0717	1.25386	1.41031	1.60762	1.80388	2.13378	2.82971	7.39995
0	0	0	0	0.017475	0.0532684	0.0777253	0.112324	0.139266	0.172543	0.207812	0.232365	0.256457	0.293891	0.321488	0.393773	0.449044	0.540135	0.649579	0.866969	1.07842	1.25425	1.41389	1.61044	1.80594	2.13511	2.83224	7.43257
0	0	0	0	0.0176327	0.053493	0.0777769	0.112625	0.14025	0.1728	0.207812	0.232628	0.256966	0.294219	0.322295	0.395435	0.451772	0.541571	0.652817	0.867197	1.08706	1.25428	1.41556	1.61204	1.8111	2.13665	2.83815	7.46205
0	0	0	0	0.0176879	0.0536196	0.0794611	0.113528	0.140328	0.173865	0.207812	0.2336	0.258241	0.294589	0.322682	0.397357	0.452136	0.545978	0.656926	0.871267	1.08827	1.25664	1.41687	1.61429	1.8126	2.13684	2.86565	7.64294
0	0	0	0	0.0177122	0.0536966	0.0794703	0.113643	0.141579	0.17389	0.207812	0.236395	0.258723	0.295203	0.322979	0.397557	0.454128	0.547926	0.657344	0.872995	1.08877	1.25925	1.42058	1.61681	1.82089	2.13874	2.86805	7.65903
0	0	0	0	0.0185913	0.0537994	0.0805418	0.113707	0.141616	0.173925	0.207812	0.236638	0.258985	0.295336	0.324315	0.398085	0.4543	0.547986	0.657368	0.878633	1.0916	1.25934	1.42419	1.61968	1.82228	2.1432	2.86849	7.76906
0	0	0	0	0.01953	0.0540086	0.0806439	0.114198	0.141792	0.17411	0.207812	0.238049	0.259569	0.295595	0.325363	0.401878	0.454711	0.548337	0.657566	0.878829	1.09325	1.2608	1.42471	1.62539	1.82548	2.14511	2.87555	7.76906
0	0	0	0	0.0198191	0.0540118	0.0808677	0.114693	0.142029	0.174292	0.207812	0.23844	0.259648	0.295667	0.325453	0.402378	0.455315	0.550248	0.657969	0.882344	1.09368	1.26118	1.42935	1.62951	1.82622	2.14815	2.87702	7.85115
0	0	0	0	0.0199684	0.0543152	0.0809874	0.115111	0.142169	0.175151	0.207812	0.238555	0.259753	0.296301	0.326062	0.402782	0.455469	0.550627	0.658094	0.883955	1.09559	1.26187	1.432	1.63208	1.82623	2.15526	2.88404	8.11845
0	0	0	0	0.0218063	0.0548909	0.0813694	0.115528	0.142428	0.175383	0.207812	0.238825	0.261607	0.301118	0.32638	0.403986	0.45601	0.55193	0.661547	0.88543	1.09733	1.26464	1.43276	1.63452	1.82779	2.16491	2.88835	8.28812
0	0	0	0	0.0229292	0.0565428	0.0818398	0.116175	0.142637	0.175997	0.207812	0.239488	0.261929	0.30176	0.327336	0.406095	0.458575	0.551941	0.663898	0.888136	1.09948	1.2648	1.43981	1.63483	1.82932	2.16707	2.89986	8.68428
0	0	0	0	0.0235902	0.0566575	0.0826079	0.116384	0.142851	0.176122	0.207812	0.239795	0.262395	0.302299	0.331285	0.406505	0.459751	0.554022	0.666665	0.889032	1.10309	1.2648	1.44635	1.63494	1.82963	2.1769	2.90331	8.76241
0	0	0	0	0.0245494	0.0567519	0.0827169	0.117766	0.142984	0.176562	0.207812	0.239822	0.26333	0.302892	0.331334	0.40665	0.461814	0.554079	0.666902	0.889811	1.1093	1.26494	1.44748	1.63969	1.83238	2.19435	2.91233	8.8247
0	0	0	0	0.0250285	0.0591118	0.0827611	0.11846	0.143238	0.17732	0.207812	0.24023	0.263918	0.305507	0.331443	0.407822	0.462072	0.554475	0.668962	0.890271	1.11362	1.27022	1.44818	1.64221	1.83433	2.21274	2.96066	8.86289
0	0	0	0	0.0263955	0.0596216	0.0830761	0.118991	0.143298	0.178415	0.207812	0.240337	0.264184	0.30555	0.332447	0.408672	0.462086	0.55465	0.669983	0.892454	1.11513	1.27073	1.45209	1.64345	1.83621	2.2186	2.96322	9.03913
0	0	0	0	0.0265793	0.059767	0.0833311	0.11912	0.14353	0.178693	0.207812	0.240898	0.265551	0.305734	0.332812	0.408864	0.463024	0.55465	0.67022	0.894346	1.11714	1.27366	1.45311	1.644	1.84207	2.2186	2.98204	9.04678
0	0	0	0	0.0270368	0.0598387	0.0843104	0.1197	0.144198	0.179132	0.207812	0.241142	0.266252	0.307319	0.332901	0.40894	0.464683	0.555984	0.673303	0.895083	1.11812	1.27407	1.45425	1.64429	1.85101	2.2186	3.00747	9.14012
0	0	0	0	0.0280858	0.0601748	0.0849811	0.119782	0.144357	0.179736	0.207812	0.241616	0.266812	0.307371	0.333174	0.409532	0.464683	0.558469	0.676277	0.898801	1.11867	1.27459	1.45537	1.64494	1.85437	2.22176	3.02134	9.21678
0	0	0	0	0.0284943	0.0604376	0.0853042	0.120303	0.144803	0.180062	0.207812	0.241643	0.267303	0.307978	0.334725	0.40972	0.464683	0.558623	0.682893	0.89954	1.11867	1.27626	1.4557	1.64631	1.8601	2.22341	3.05129	9.22617
0	0	0	0	0.0302767	0.060528	0.0867379	0.120526	0.144955	0.180517	0.207812	0.242054	0.267758	0.308665	0.33509	0.41014	0.465854	0.560283	0.682991	0.899665	1.11957	1.29076	1.46138	1.65254	1.86163	2.22459	3.0514	9.28561
0	0	0	0	0.0309924	0.0605687	0.0870768	0.120781	0.146102	0.180708	0.207812	0.242774	0.268603	0.309617	0.335484	0.411159	0.466438	0.564339	0.68395	0.900762	1.12219	1.29441	1.46245	1.65788	1.86299	2.22593	3.06584	9.52615
0	0	0	0	0.0319129	0.060589	0.0870994	0.121109	0.146859	0.180768	0.207812	0.243197	0.268847	0.310156	0.335966	0.411551	0.466635	0.565326	0.684265	0.905229	1.12263	1.29449	1.46542	1.66395	1.86982	2.23242	3.07635	9.6183
0	0	0	0	0.0319608	0.0608819	0.0871887	0.121632	0.148044	0.181267	0.207812	0.243436	0.269105	0.310156	0.338234	0.412318	0.467213	0.565958	0.686806	0.905717	1.12328	1.29488	1.46733	1.66395	1.87092	2.23494	3.07855	9.73887
0	0	0	0	0.0328842	0.0613786	0.0879226	0.12189	0.148242	0.181729	0.207812	0.244304	0.269302	0.310156	0.338295	0.412432	0.467316	0.566178	0.687992	0.906556	1.12486	1.29919	1.47646	1.66398	1.87333	2.24644	3.08376	9.82863
0	0	0	0	0.0330954	0.0614001	0.0892784	0.121929	0.148703	0.181763	0.207812	0.245002	0.269558	0.310156	0.338602	0.413587	0.471091	0.567835	0.688105	0.910483	1.12561	1.3019	1.47718	1.66594	1.87653	2.25759	3.08446	10.0124
0	0	0	0	0.0332642	0.0614374	0.0901128	0.122113	0.149114	0.182382	0.207812	0.245073	0.270074	0.310156	0.338731	0.414101	0.471694	0.568528	0.689253	0.910669	1.12753	1.30217	1.47933	1.66597	1.87877	2.25872	3.10059	10.1531
0	0	0	0	0.0356477	0.0615409	0.0901569	0.122292	0.149605	0.183677	0.207812	0.245462	0.270075	0.310156	0.339276	0.414897	0.471887	0.572312	0.689642	0.911339	1.12806	1.30227	1.48108	1.66599	1.88318	2.2616	3.10944	10.1685
0	0	0	0	0.0363769	0.061858	0.0904445	0.122878	0.149618	0.183854	0.207812	0.245873	0.270688	0.310156	0.339993	0.415625	0.472166	0.57309	0.69025	0.915001	1.13002	1.30371	1.48763	1.66748	1.88342	2.26495	3.16315	24.035
0	0	0	0	0.0369269	0.0619205	0.0905053	0.122891	0.149828	0.184532	0.207812	0.245956	0.270809	0.310156	0.340797	0.415625	0.472306	0.573864	0.690401	0.916229	1.13079	1.30589	1.48828	1.66845	1.88874	2.27354	3.16461	24.5879
0	0	0	0	0.0369398	0.0622228	0.0906072	0.123156	0.150106	0.185164	0.207812	0.246401	0.270904	0.310156	0.342444	0.415625	0.474888	0.573985	0.692856	0.916512	1.13113	1.30857	1.49114	1.6731	1.88907	2.27654	3.1649	25.0146
0	0	0	0	0.0371004	0.0627323	0.0912264	0.12355	0.150571	0.185477	0.207812	0.246678	0.271092	0.310156	0.343455	0.415625	0.476148	0.575282	0.693058	0.917595	1.13265	1.31242	1.49143	1.6734	1.893	2.27796	3.17098	25.2289
0	0	0	0	0.037213	0.0627334	0.0912856	0.123836	0.150947	0.185483	0.207812	0.246901	0.271793	0.310156	0.343898	0.415625	0.476202	0.575511	0.69353	0.923771	1.13706	1.31269	1.49619	1.67415	1.89396	2.28273	3.17562	25.3214
0	0	0	0	0.0375824	0.0628863	0.0914705	0.124389	0.151426	0.18563	0.207812	0.248047	0.272461	0.310156	0.344538	0.415625	0.482764	0.576114	0.694029	0.924461	1.14859	1.31386	1.49939	1.67637	1.90312	2.28557	3.17813	25.4439
0	0	0	0	0.0377323	0.0640934	0.0920244	0.124442	0.152134	0.185978	0.207812	0.248047	0.273132	0.310156	0.344729	0.415625	0.483218	0.576657	0.694773	0.926379	1.15027	1.31397	1.50479	1.67692	1.92003	2.28688	3.1845	25.6594
0	0	0	0	0.0379016	0.0642237	0.0933093	0.124537	0.152173	0.185994	0.207812	0.248047	0.273443	0.310156	0.347999	0.415625	0.483227	0.577703	0.696414	0.929216	1.15426	1.31402	1.51399	1.67743	1.92397	2.30271	3.18715
0	0	0	0	0.0382914	0.0646248	0.093619	0.124584	0.152244	0.186439	0.207812	0.248047	0.273809	0.310156	0.34801	0.415625	0.483736	0.578776	0.696513	0.929893	1.15596	1.31481	1.51549	1.68069	1.92416	2.30567	3.2062
0	0	0	0	0.0391749	0.0646327	0.0942726	0.124623	0.152754	0.186987	0.207812	0.248047	0.273952	0.310156	0.349068	0.415625	0.484118	0.579156	0.697271	0.931823	1.15673	1.32238	1.5265	1.68192	1.93041	2.31471	3.22187
0	0	0	0	0.0393266	0.0648243	0.0947067	0.125224	0.15307	0.187034	0.207812	0.248047	0.274704	0.310156	0.350791	0.415625	0.489994	0.58001	0.697992	0.933493	1.16062	1.32311	1.52924	1.68278	1.93235	2.32005	3.22718
0	0	0	0	0.0397334	0.0649197	0.0956487	0.125343	0.153364	0.187143	0.207812	0.248047	0.275758	0.310156	0.350791	0.415625	0.492696	0.580025	0.700301	0.937845	1.16165	1.33209	1.53056	1.68287	1.93353	2.3324	3.26321
0	0	0	0	0.0400788	0.0654307	0.0959159	0.126294	0.154239	0.187148	0.207812	0.248047	0.276431	0.310156	0.350791	0.415625	0.495399	0.581453	0.701583	0.938703	1.16352	1.33562	1.53301	1.68547	1.93369	2.33645	3.2796
0	0	0	0	0.0405081	0.0657878	0.0960245	0.12662	0.154245	0.187237	0.207812	0.248047	0.277896	0.310156	0.350791	0.417532	0.495636	0.581527	0.701583	0.944332	1.16519	1.33577	1.53819	1.68576	1.93537	2.34697	3.28072
0	0	0	0	0.0412635	0.0660118	0.0963475	0.126806	0.154265	0.1883	0.207812	0.248047	0.278581	0.310156	0.351456	0.418816	0.496094	0.581946	0.702234	0.948464	1.16558	1.33577	1.54225	1.69282	1.93925	2.35575	3.30063
0	0	0	0	0.0415668	0.066201	0.0964376	0.126928	0.154572	0.188625	0.207812	0.248047	0.278633	0.310156	0.352862	0.420201	0.496094	0.583529	0.70579	0.94853	1.1684	1.33577	1.54318	1.694	1.94216	2.36039	3.30625
0	0	0	0	0.0415812	0.0663264	0.0965182	0.126997	0.156276	0.188982	0.207813	0.248047	0.279173	0.310156	0.352909	0.42043	0.496094	0.583827	0.706869	0.948714	1.17504	1.3359	1.55143	1.69633	1.94452	2.36169	3.31063
0	0	0	0	0.0418465	0.0665288	0.0969978	0.12725	0.156343	0.189026	0.207841	0.248047	0.279476	0.310156	0.353231	0.421023	0.496631	0.58406	0.70778	0.948908	1.17523	1.33836	1.55324	1.6983	1.94702	2.36215	3.31957
0	0	0	0	0.0419414	0.0665499	0.09746	0.127396	0.15697	0.189097	0.207948	0.248047	0.279669	0.310156	0.354614	0.42114	0.496998	0.584353	0.708627	0.952683	1.17755	1.33917	1.55383	1.70144	1.9527	2.37437	3.32155
0	0	0	0	0.0437549	0.0679297	0.0975546	0.128083	0.15704	0.189782	0.209121	0.248047	0.279679	0.310156	0.356582	0.421326	0.498672	0.584601	0.710692	0.952806	1.18006	1.35243	1.557	1.70264	1.9551	2.39276	3.32227
0	0	0	0	0.0438504	0.0679785	0.0978501	0.128142	0.157321	0.189859	0.209127	0.248047	0.281075	0.310156	0.357152	0.421418	0.501716	0.585267	0.710889	0.954096	1.18427	1.35317	1.56324	1.70299	1.95545	2.41338	3.32444
0	0	0	0	0.0449842	0.0687376	0.09794	0.128168	0.157463	0.190104	0.209182	0.248047	0.281096	0.310156	0.357488	0.421925	0.501859	0.587314	0.712102	0.955174	1.18737	1.3565	1.56465	1.70812	1.95664	2.42041	3.32956
0	0	0	0	0.0453147	0.0696848	0.0985342	0.128635	0.157718	0.190112	0.20961	0.248047	0.281526	0.310156	0.358786	0.424305	0.502911	0.587783	0.712733	0.957771	1.18799	1.35659	1.56479	1.7108	1.95774	2.42136	3.33581
0	0	0	0	0.0473401	0.0701225	0.0985407	0.12918	0.158112	0.190378	0.211133	0.248047	0.281576	0.310386	0.358974	0.42481	0.502929	0.588801	0.713948	0.958152	1.18907	1.35663	1.57103	1.71265	1.96117	2.42948	3.3609
0	0	0	0	0.0479026	0.070601	0.0994994	0.129204	0.158737	0.191195	0.211574	0.248047	0.281994	0.311614	0.359932	0.427922	0.503584	0.589988	0.714958	0.964895	1.18962	1.35687	1.57434	1.71853	1.96564	2.44298	3.37874
0	0	0	0	0.0480765	0.0708708	0.0997839	0.129619	0.158986	0.19154	0.211942	0.248047	0.282283	0.311914	0.360247	0.429238	0.504928	0.591403	0.716443	0.96525	1.1932	1.35782	1.57498	1.71882	1.96795	2.45467	3.38409
0	0	0	0	0.0481125	0.0709789	0.100007	0.129739	0.15978	0.191748	0.212025	0.248047	0.282911	0.312247	0.36036	0.429677	0.506414	0.591849	0.716971	0.967235	1.1949	1.35875	1.57693	1.71941	1.9693	2.46527	3.38568
0	0	0	0	0.0482631	0.071253	0.100268	0.130045	0.160139	0.192549	0.212132	0.248047	0.283103	0.312265	0.363203	0.430237	0.506522	0.591988	0.717349	0.968366	1.197	1.3594	1.58056	1.72137	1.9741	2.4654	3.43312
0	0	0	0	0.0483498	0.0726206	0.100473	0.130106	0.160142	0.194447	0.213257	0.248511	0.2852	0.312446	0.36356	0.432248	0.508019	0.592481	0.719806	0.970807	1.19907	1.36105	1.58081	1.72359	1.98046	2.4717	3.43898
0	0	0	0	0.0484561	0.0727138	0.100708	0.130792	0.160208	0.195247	0.214136	0.249049	0.285555	0.313575	0.364591	0.432765	0.511777	0.593209	0.719826	0.974349	1.20088	1.36254	1.58176	1.72569	1.98219	2.48047	3.44304
0	0	0	0.00105966	0.048622	0.0732079	0.100755	0.13089	0.160581	0.19543	0.214655	0.249345	0.287264	0.313799	0.365256	0.433187	0.51383	0.593769	0.719859	0.976041	1.2039	1.36506	1.58398	1.7296	1.9827	2.48644	3.44844
0	0	0	0.0100581	0.0489215	0.0733296	0.100856	0.131219	0.161291	0.195518	0.215168	0.250346	0.287379	0.313942	0.365766	0.435704	0.515787	0.595608	0.72049	0.977168	1.20552	1.36583	1.58561	1.73633	1.98438	2.49284	3.47266
0	0	0	0.0106725	0.0491291	0.0737749	0.100986	0.131292	0.161549	0.195808	0.215227	0.251606	0.287416	0.314699	0.367229	0.436301	0.516218	0.596143	0.721664	0.977448	1.20579	1.36959	1.58924	1.73677	1.98438	2.49284	3.50733
0	0	0	0.0115411	0.0500147	0.074108	0.101098	0.131326	0.161564	0.195897	0.215762	0.251815	0.288463	0.315003	0.368017	0.436623	0.517471	0.597602	0.721981	0.978095	1.20708	1.37041	1.58987	1.74489	1.98438	2.50249	3.50792
0	0	0	0.0124023	0.0503181	0.0741522	0.101456	0.131512	0.161714	0.196162	0.216231	0.251917	0.288741	0.315338	0.36871	0.437301	0.517659	0.600511	0.72634	0.978189	1.20721	1.37188	1.59153	1.74811	1.98637	2.50898	3.51167
0	0	0	0.0128226	0.0506925	0.0742933	0.102575	0.131677	0.16222	0.196371	0.216377	0.251946	0.289012	0.315545	0.368716	0.438627	0.518835	0.605288	0.726788	0.980723	1.21134	1.37249	1.59269	1.74886	1.9917	2.50908	3.5737
0	0	0	0.0137106	0.0511901	0.0744786	0.102629	0.132143	0.16393	0.196559	0.216393	0.252021	0.289102	0.315637	0.370192	0.438627	0.52012	0.606507	0.727027	0.980729	1.21284	1.37841	1.596	1.75112	1.99488	2.51102	3.57461
0	0	0	0.0144768	0.0512106	0.074842	0.103627	0.13231	0.164337	0.196844	0.21667	0.252021	0.290375	0.319019	0.370717	0.43995	0.522479	0.607149	0.728043	0.984966	1.21391	1.37957	1.59679	1.7564	1.99982	2.51571	3.59663
0	0	0	0.0148911	0.0514606	0.0752006	0.104012	0.132592	0.164459	0.196967	0.216682	0.25286	0.291457	0.319868	0.370949	0.44003	0.523434	0.609428	0.729476	0.98928	1.21495	1.38054	1.59984	1.7585	1.99998	2.52297	3.59829
0	0	0	0.015416	0.0515616	0.0755235	0.104188	0.133116	0.164758	0.197084	0.217716	0.252954	0.291639	0.320458	0.374826	0.443616	0.52456	0.609474	0.731439	0.98928	1.21577	1.3841	1.6029	1.75863	2.00462	2.52793	3.6002
0	0	0	0.0156637	0.051877	0.0764821	0.104392	0.133914	0.164827	0.197782	0.21828	0.253341	0.29216	0.320555	0.37484	0.44428	0.52689	0.609794	0.731861	0.992188	1.2161	1.3846	1.60365	1.75878	2.00514	2.52959	3.63573
0	0	0	0.0161735	0.0518783	0.077327	0.104951	0.134151	0.165557	0.199483	0.218887	0.253973	0.292549	0.321044	0.374888	0.44577	0.527086	0.612466	0.734115	0.992188	1.21658	1.38903	1.60474	1.75933	2.01138	2.54254	3.66413
0	0	0	0.0166693	0.0519651	0.0777509	0.105394	0.134848	0.165895	0.202501	0.219876	0.254394	0.293242	0.321667	0.375038	0.447206	0.527649	0.615242	0.738764	0.992188	1.21717	1.38945	1.60675	1.7597	2.0196	2.5682	3.68556
0	0	0	0.0170332	0.0520056	0.0779327	0.105533	0.134869	0.165973	0.202791	0.220178	0.255373	0.293891	0.322058	0.375136	0.447717	0.527657	0.61696	0.738795	0.992633	1.22046	1.39034	1.60879	1.76944	2.02279	2.57014	3.69622
0	0	0	0.0177129	0.052838	0.0782819	0.105665	0.135356	0.16618	0.203009	0.220498	0.25563	0.293891	0.322122	0.376435	0.448135	0.530621	0.617194	0.744141	0.996194	1.2209	1.3904	1.60893	1.76979	2.03061	2.57498	3.73718
0	0	0	0.0177631	0.0531705	0.0786389	0.106442	0.135681	0.166254	0.203128	0.22059	0.255754	0.293891	0.322616	0.377681	0.44866	0.531418	0.61989	0.744141	1.00623	1.22189	1.39114	1.60928	1.77414	2.03085	2.58969	3.75818
0	0	0	0.0191066	0.0531967	0.0790693	0.106637	0.136181	0.166258	0.203271	0.22094	0.25632	0.293891	0.324101	0.378119	0.448857	0.533736	0.620312	0.744141	1.00677	1.22554	1.39165	1.61093	1.77424	2.03741	2.59057	3.78744
0	0	0	0.0200356	0.0536971	0.0796489	0.106911	0.136442	0.166269	0.20394	0.221357	0.256627	0.293891	0.324751	0.378548	0.449017	0.534477	0.620312	0.744141	1.00743	1.22734	1.39294	1.61303	1.7753	2.04122	2.59969	3.82894
0	0	0	0.0219012	0.0542846	0.0798247	0.10707	0.137059	0.166955	0.204364	0.221828	0.256856	0.29426	0.325501	0.380004	0.449206	0.53508	0.620312	0.748263	1.00913	1.22995	1.39656	1.6149	1.78654	2.04262	2.60153	3.88143
0	0	0	0.022441	0.0551123	0.0805952	0.107092	0.137978	0.167258	0.204442	0.222023	0.257024	0.295459	0.32606	0.381027	0.449457	0.535662	0.620312	0.752279	1.00935	1.2317	1.39821	1.61514	1.78869	2.04307	2.60947	3.92197
0	0	0	0.0224975	0.0553212	0.0810294	0.107839	0.13801	0.168218	0.20448	0.222199	0.257337	0.29552	0.326623	0.382623	0.449725	0.537619	0.620312	0.755086	1.01008	1.23425	1.40662	1.617	1.78925	2.04978	2.61292	3.94479
0	0	0	0.0227252	0.0555693	0.0810432	0.108041	0.138067	0.168321	0.204758	0.223522	0.257785	0.295802	0.327648	0.383469	0.452092	0.540255	0.620313	0.75732	1.0104	1.23584	1.41419	1.61741	1.79194	2.05355	2.61957	3.96212
0	0	0	0.0248408	0.0556737	0.0815522	0.108277	0.138185	0.169588	0.20519	0.224235	0.257826	0.296152	0.327875	0.384045	0.452818	0.541218	0.620447	0.759128	1.01263	1.2362	1.41763	1.61767	1.79721	2.05841	2.62284	4.03294
0	0	0	0.0258659	0.0558508	0.0823333	0.108365	0.138435	0.169603	0.205403	0.224294	0.258348	0.296388	0.328031	0.386279	0.456486	0.543101	0.620598	0.760876	1.01506	1.23696	1.42709	1.62389	1.79758	2.06799	2.62724	4.04105
0	0	0	0.0260651	0.0559369	0.0827236	0.108604	0.138524	0.169611	0.205498	0.224912	0.258474	0.29734	0.328098	0.386321	0.456745	0.543214	0.622737	0.761485	1.01514	1.23741	1.42845	1.62538	1.80073	2.06892	2.63497	4.12069
0	0	0	0.0261369	0.0569338	0.0827775	0.108903	0.138622	0.169773	0.207812	0.225017	0.258546	0.297403	0.32893	0.388092	0.458049	0.543307	0.623437	0.761585	1.01731	1.238	1.42903	1.62689	1.80101	2.07527	2.6443	4.13428
0	0	0	0.0262546	0.0571618	0.0833582	0.109539	0.138819	0.17021	0.207812	0.225317	0.258941	0.298125	0.329213	0.388447	0.458311	0.543707	0.623437	0.762298	1.02173	1.24023	1.43082	1.62883	1.80122	2.07706	2.64825	4.16504
0	0	0	0.0263365	0.0572043	0.0837617	0.109665	0.138964	0.170327	0.207812	0.225321	0.259192	0.298558	0.329656	0.390141	0.45847	0.543827	0.623438	0.762831	1.02272	1.24023	1.43212	1.63027	1.80784	2.07731	2.65128	4.16604
0	0	0	0.0263562	0.0573999	0.0845691	0.109674	0.13909	0.171846	0.207812	0.225713	0.25985	0.299135	0.331514	0.390758	0.459315	0.544039	0.623438	0.763604	1.0273	1.24076	1.43278	1.63164	1.81206	2.08247	2.65339	4.17272
0	0	0	0.0273923	0.0577335	0.0848169	0.109854	0.139511	0.171849	0.207812	0.22633	0.260733	0.301454	0.331529	0.390832	0.459819	0.546865	0.623438	0.766837	1.03003	1.24256	1.43322	1.63196	1.82264	2.08475	2.65546	4.33463
0	0	0	0.0280972	0.0580289	0.0851383	0.109986	0.139848	0.171877	0.207812	0.227018	0.261169	0.301464	0.331998	0.391208	0.460316	0.548104	0.623483	0.767269	1.03266	1.24452	1.43477	1.63437	1.82334	2.08539	2.65868	4.3501
0	0	0	0.02838	0.058264	0.0851882	0.1101	0.139897	0.173023	0.207812	0.227152	0.261177	0.30227	0.332926	0.391765	0.461789	0.548977	0.625858	0.767424	1.0334	1.24595	1.43942	1.63665	1.82477	2.08827	2.66004	4.4626
0	0	0	0.0295056	0.0582788	0.085702	0.110137	0.140508	0.173374	0.207812	0.228893	0.262609	0.302821	0.333168	0.391827	0.462061	0.549233	0.628707	0.769341	1.03906	1.25276	1.43965	1.63862	1.82601	2.0918	2.66124	4.47808
0	0	0	0.0297014	0.0585384	0.0860241	0.110151	0.140921	0.174582	0.207812	0.229169	0.262924	0.302841	0.33394	0.394257	0.462293	0.549504	0.630295	0.769439	1.03906	1.25596	1.44094	1.64153	1.82861	2.09272	2.66141	4.56574
0	0	0	0.0305539	0.058673	0.0863181	0.110437	0.141313	0.174718	0.207812	0.229351	0.263253	0.303159	0.334057	0.394616	0.46294	0.549963	0.631364	0.772791	1.03906	1.26219	1.44516	1.64272	1.8318	2.10345	2.6712	4.69145
0	0	0	0.0313819	0.0590285	0.086547	0.111031	0.142343	0.174841	0.207812	0.22948	0.263538	0.303497	0.334916	0.394747	0.463234	0.55146	0.632445	0.773008	1.03906	1.26291	1.4453	1.6432	1.83482	2.1046	2.67155	4.70906
0	0	0	0.0314638	0.0593787	0.0878126	0.111977	0.142864	0.175333	0.207812	0.229509	0.264146	0.3039	0.335388	0.394761	0.464338	0.552614	0.633079	0.774482	1.04016	1.26438	1.44635	1.6518	1.84404	2.10901	2.67294	4.7441
0	0	0	0.0320221	0.0595768	0.0880283	0.11211	0.143518	0.175557	0.207812	0.22952	0.265595	0.304744	0.336255	0.394779	0.464683	0.552712	0.635087	0.775785	1.04033	1.26453	1.45069	1.65338	1.84452	2.11249	2.67753	4.85474
0	0	0	0.0323489	0.0597736	0.0881821	0.112239	0.144222	0.17561	0.207812	0.23036	0.265691	0.305095	0.336301	0.395022	0.464683	0.554223	0.636839	0.777421	1.04112	1.2648	1.45193	1.65477	1.85078	2.11687	2.68084	4.85792
0	0	0	0.0331042	0.0599807	0.0885143	0.112757	0.145031	0.175927	0.207812	0.231252	0.266179	0.305165	0.338065	0.395606	0.464683	0.554241	0.638565	0.778281	1.04265	1.2648	1.45874	1.65654	1.85079	2.11746	2.6838	4.861
0	0	0	0.0335157	0.0600651	0.0899576	0.113186	0.145072	0.176159	0.207812	0.231468	0.266238	0.306152	0.339445	0.396579	0.464683	0.55465	0.638802	0.778692	1.04466	1.26687	1.46124	1.6588	1.85086	2.11931	2.68734	4.87335
0	0	0	0.0339363	0.0606297	0.0921644	0.113354	0.145393	0.176265	0.207812	0.231966	0.266751	0.30617	0.340274	0.396939	0.464683	0.554855	0.638853	0.77946	1.04574	1.26978	1.46329	1.66142	1.85209	2.12298	2.69202	4.87665
0	0	0	0.0343446	0.0606812	0.092865	0.113741	0.145638	0.176299	0.207812	0.232113	0.267003	0.306903	0.340485	0.397659	0.464683	0.556878	0.639658	0.782913	1.04738	1.26991	1.46489	1.66181	1.85458	2.12393	2.70287	4.87896
0	0	0	0.0349924	0.0613906	0.0936241	0.114144	0.145899	0.177019	0.207812	0.232214	0.267125	0.308256	0.340604	0.398074	0.464683	0.558324	0.640061	0.784393	1.04767	1.2706	1.46592	1.66346	1.85653	2.12684	2.70586	4.89655
0	0	0	0.0350802	0.0614501	0.093851	0.114525	0.146051	0.177347	0.207812	0.232263	0.267211	0.30831	0.340644	0.398167	0.466495	0.558325	0.641509	0.784393	1.05049	1.27085	1.46783	1.66386	1.85773	2.13359	2.71095	4.90429
0	0	0	0.0355037	0.0616962	0.0939585	0.114651	0.146161	0.177684	0.207812	0.232302	0.267336	0.308502	0.340773	0.399645	0.468815	0.558578	0.641539	0.784393	1.05089	1.27163	1.47054	1.66395	1.85951	2.13378	2.71288	4.92263
0	0	0	0.0361176	0.061829	0.094005	0.114728	0.146279	0.177961	0.207812	0.232838	0.267605	0.309894	0.340989	0.399724	0.468919	0.559997	0.641707	0.786566	1.05237	1.27199	1.47131	1.66454	1.86223	2.13687	2.7207	4.93728
0	0	0	0.036266	0.0618886	0.0940626	0.115093	0.146409	0.177988	0.207812	0.233237	0.268002	0.309985	0.341116	0.401044	0.47093	0.560554	0.641956	0.792214	1.05237	1.27381	1.47176	1.66522	1.86512	2.14075	2.72244	4.93963
0	0	0	0.03706	0.0621511	0.0942918	0.115113	0.146541	0.178005	0.207812	0.233561	0.268826	0.310156	0.342116	0.401179	0.471704	0.560628	0.64202	0.794986	1.05624	1.27421	1.47176	1.67117	1.86786	2.14407	2.72873	4.95088
0	0	0	0.0371444	0.0634868	0.0945016	0.115312	0.146555	0.17814	0.207812	0.233598	0.269381	0.310156	0.342584	0.40193	0.471713	0.562162	0.642257	0.795312	1.06254	1.27454	1.47176	1.67412	1.87114	2.14664	2.75926	4.96687
0	0	0	0.0373696	0.0635588	0.0945042	0.115387	0.146571	0.178508	0.207812	0.23379	0.269424	0.310156	0.343479	0.404916	0.472282	0.56274	0.643257	0.796021	1.06668	1.2811	1.47241	1.67423	1.87308	2.14878	2.76248	5.0067
0	0	0	0.0374571	0.0637333	0.0947319	0.115896	0.146874	0.179428	0.207812	0.233844	0.269749	0.310156	0.343723	0.405536	0.474304	0.562753	0.644829	0.796585	1.06682	1.2812	1.47402	1.67437	1.87362	2.15636	2.77325	5.02297
0	0	0	0.0376941	0.0637416	0.0949157	0.115937	0.147338	0.179611	0.207812	0.235234	0.269906	0.310156	0.343724	0.406613	0.475926	0.565092	0.645799	0.796826	1.06972	1.28167	1.4757	1.67464	1.87419	2.16221	2.77325	5.02688
0	0	0.00326255	0.0381552	0.0638672	0.0949413	0.116064	0.147652	0.179687	0.207812	0.235266	0.270744	0.310156	0.343754	0.406967	0.476062	0.565315	0.64631	0.797218	1.07589	1.28344	1.47715	1.67958	1.87751	2.16671	2.78546	5.04698
0	0	0.00694542	0.0382166	0.0642079	0.0950516	0.116257	0.147692	0.179722	0.207812	0.236532	0.271523	0.310156	0.344166	0.408138	0.476636	0.566559	0.646624	0.797528	1.07718	1.28351	1.4775	1.68118	1.88252	2.16858	2.7874	5.11362
0	0	0.00815894	0.0383125	0.0642873	0.0952558	0.116709	0.147838	0.180199	0.207812	0.237514	0.271903	0.310156	0.344728	0.408822	0.477042	0.567172	0.64678	0.79879	1.07767	1.28415	1.48424	1.69222	1.88545	2.1748	2.79689	5.11362
0	0	0.00937678	0.0387789	0.0644664	0.0955394	0.116783	0.147867	0.180352	0.207812	0.237566	0.271942	0.310156	0.344734	0.409929	0.477255	0.568288	0.647127	0.800392	1.08264	1.28511	1.48461	1.6935	1.88907	2.18298	2.80147	5.11362
0	0	0.00966508	0.0390003	0.065214	0.0955973	0.116897	0.148117	0.18103	0.207812	0.237736	0.272221	0.310156	0.346032	0.409996	0.477274	0.569361	0.647186	0.800878	1.08325	1.28607	1.48807	1.69389	1.89456	2.18658	2.81657	5.20898
0	0	0.0101561	0.0390403	0.0655685	0.0959087	0.117669	0.148569	0.181145	0.207812	0.238738	0.272305	0.310156	0.346556	0.4103	0.478097	0.571874	0.647381	0.80465	1.08347	1.28648	1.48828	1.69663	1.89581	2.19027	2.82575	5.21489
0	0	0.0115425	0.0404004	0.0656286	0.0962077	0.117701	0.148956	0.18247	0.207812	0.238983	0.272592	0.310156	0.347157	0.411704	0.47837	0.572393	0.649433	0.805797	1.08378	1.28671	1.4888	1.69694	1.89785	2.19392	2.83079	5.22292
0	0	0.011672	0.0410295	0.0657366	0.0962449	0.117844	0.149438	0.182758	0.207812	0.239268	0.272982	0.310156	0.347376	0.411729	0.478608	0.572468	0.651759	0.807223	1.08638	1.28752	1.48972	1.69944	1.8997	2.19469	2.83395	5.22909
0	0	0.0142821	0.0411687	0.0665651	0.0965849	0.118318	0.149525	0.182834	0.207812	0.239752	0.27366	0.310156	0.347509	0.413819	0.478677	0.573175	0.653301	0.807377	1.08835	1.29021	1.48978	1.70042	1.90086	2.2016	2.84599	5.27392
0	0	0.0149585	0.0414409	0.0665934	0.0973759	0.118371	0.149627	0.183036	0.207812	0.239767	0.273841	0.310156	0.347557	0.414005	0.478733	0.574375	0.653482	0.807627	1.08938	1.29068	1.49013	1.70227	1.9024	2.20319	2.85127	5.33228
0	0	0.0152145	0.0414878	0.0670004	0.0975047	0.118423	0.149953	0.183058	0.207812	0.240107	0.273892	0.310156	0.348211	0.414276	0.4797	0.575936	0.654763	0.807928	1.09673	1.29226	1.49108	1.70615	1.90623	2.20537	2.87573	5.3546
0	0	0.0154621	0.0416069	0.0674107	0.0975391	0.118668	0.149961	0.18317	0.207812	0.24015	0.274151	0.310156	0.348297	0.415625	0.479754	0.576137	0.656009	0.811372	1.09871	1.29285	1.49299	1.70771	1.9069	2.21141	2.88893	5.50753
0	0	0.0158734	0.0420369	0.0675017	0.0976197	0.118918	0.150132	0.183545	0.207812	0.24071	0.274162	0.310156	0.34837	0.415625	0.48185	0.578897	0.656218	0.812082	1.10047	1.29557	1.49477	1.71201	1.9084	2.21706	2.89141	5.5467
0	0	0.0163444	0.0422714	0.0675459	0.09773	0.11921	0.150497	0.18421	0.207812	0.241352	0.27444	0.310156	0.348515	0.415625	0.484738	0.57968	0.656276	0.812474	1.1017	1.29687	1.4957	1.71479	1.90906	2.23242	2.8956	5.57624
0	0	0.0167354	0.0428736	0.0676324	0.0979669	0.120323	0.150699	0.185	0.207812	0.241364	0.27472	0.310156	0.348663	0.415625	0.485085	0.579776	0.657161	0.814418	1.10218	1.29699	1.49681	1.7185	1.90955	2.23242	2.90167	5.59619
0	0	0.0171646	0.0433762	0.0678857	0.0980254	0.120505	0.151128	0.185112	0.207812	0.241384	0.275101	0.310156	0.348783	0.415625	0.486649	0.580009	0.657161	0.815477	1.10277	1.29951	1.50093	1.71919	1.91484	2.23242	2.91302	5.67115
0	0	0.0172303	0.0436961	0.0679468	0.0985677	0.120518	0.151613	0.185475	0.207812	0.241691	0.275219	0.310156	0.350136	0.415625	0.487034	0.580171	0.658425	0.815783	1.10386	1.30006	1.50378	1.7201	1.91524	2.23886	2.91382	5.72531
0	0	0.017502	0.0439437	0.0680236	0.0987533	0.121044	0.151857	0.18557	0.207812	0.241733	0.275497	0.310156	0.350529	0.415625	0.487798	0.580427	0.658744	0.817617	1.10429	1.3015	1.50463	1.72383	1.91589	2.23927	2.91711	5.80688
0	0	0.0177566	0.0440515	0.0680484	0.0988619	0.121059	0.152006	0.185694	0.207812	0.241921	0.275812	0.310156	0.350791	0.415625	0.489362	0.580637	0.659807	0.817877	1.10735	1.30227	1.50819	1.72385	1.91619	2.25438	2.92912	5.83833
0	0	0.0178942	0.0441164	0.0681322	0.0988739	0.121366	0.152131	0.185909	0.207813	0.241992	0.27605	0.310156	0.35223	0.415625	0.489956	0.581212	0.661726	0.819325	1.10789	1.30627	1.50881	1.72402	1.91804	2.25923	2.93124	5.83833
0	0	0.0181977	0.0442763	0.0681765	0.0988787	0.121424	0.152532	0.186529	0.207949	0.242011	0.276097	0.310156	0.352898	0.415625	0.489989	0.582288	0.663306	0.822805	1.1084	1.30667	1.50881	1.72499	1.92001	2.28569	2.94589	5.87589
0	0	0.0202618	0.0444347	0.0688347	0.0992076	0.121553	0.154584	0.187114	0.207994	0.243793	0.276586	0.310156	0.353606	0.415625	0.493364	0.582801	0.664252	0.823205	1.1093	1.30918	1.51255	1.72672	1.92492	2.28688	2.95306	5.93341
0	0	0.0218005	0.0448881	0.0689214	0.0994633	0.121865	0.154638	0.187149	0.208057	0.244165	0.277046	0.310156	0.353916	0.415625	0.494174	0.583364	0.664623	0.823844	1.11188	1.30961	1.51324	1.72718	1.93077	2.30778	2.9583	5.93362
0	0	0.0220497	0.0449211	0.06914	0.0995457	0.122257	0.154824	0.187469	0.208278	0.245479	0.277166	0.310156	0.354324	0.415625	0.49525	0.583902	0.666149	0.824235	1.11225	1.31106	1.51375	1.7273	1.93129	2.3114	2.96042	5.97767
0	0	0.0222602	0.0451668	0.0692582	0.0995928	0.12229	0.154968	0.187493	0.2083	0.24551	0.277267	0.310156	0.354709	0.415625	0.496094	0.584432	0.668786	0.830625	1.1124	1.31799	1.51726	1.72881	1.9321	2.31296	2.97952	6.12455
0	0	0.0225269	0.0461374	0.0692781	0.0996544	0.12232	0.15537	0.187676	0.208316	0.245524	0.278009	0.310156	0.355036	0.415625	0.496094	0.585011	0.668838	0.83125	1.11242	1.32815	1.52039	1.73031	1.93367	2.31593	2.98685	6.32398
0	0	0.023288	0.0462369	0.0693365	0.100743	0.122725	0.15592	0.187759	0.208869	0.245995	0.278009	0.310156	0.355579	0.415625	0.496094	0.585177	0.669349	0.83125	1.11393	1.32922	1.52532	1.73425	1.93821	2.32419	2.9941	6.32398
0	0	0.0236432	0.0467606	0.0694082	0.101242	0.122726	0.155981	0.188343	0.209061	0.246434	0.279058	0.310156	0.355822	0.415625	0.496094	0.5857	0.669969	0.833713	1.1151	1.32999	1.52604	1.73633	1.93966	2.32511	3.00062	6.32398
0	0	0.0238206	0.0468679	0.0696056	0.101307	0.122866	0.156338	0.188392	0.210333	0.24688	0.280048	0.310156	0.356413	0.415935	0.496094	0.58665	0.670183	0.834116	1.1172	1.33327	1.52829	1.7368	1.94395	2.33053	3.0229	6.39511
0	0	0.0241056	0.0469657	0.0697283	0.101403	0.123038	0.15655	0.188573	0.210545	0.246924	0.280211	0.310641	0.357437	0.416001	0.496094	0.587656	0.670787	0.836147	1.11947	1.33445	1.5307	1.73861	1.94433	2.34007	3.06028	6.40751
0	0	0.0244566	0.0474224	0.0697612	0.101439	0.123487	0.157054	0.188704	0.210941	0.246963	0.28059	0.310718	0.360067	0.417398	0.496094	0.587666	0.671305	0.837374	1.12128	1.33577	1.53269	1.74882	1.95064	2.34836	3.0749	6.43967
0	0	0.0250524	0.0476464	0.0701125	0.101518	0.123529	0.157861	0.189268	0.211668	0.247277	0.280706	0.310779	0.361869	0.417553	0.496143	0.588569	0.672754	0.837418	1.12144	1.33611	1.53392	1.75161	1.9531	2.35038	3.07914	6.46573
0	0	0.0250853	0.0478097	0.0701171	0.1019	0.124472	0.157881	0.189296	0.211942	0.247675	0.280875	0.311013	0.36204	0.417783	0.496152	0.588817	0.675174	0.837559	1.12169	1.33712	1.53446	1.75386	1.95365	2.3547	3.10171	6.46949
0	0	0.0251601	0.0478793	0.0702369	0.101952	0.12455	0.158001	0.189985	0.213363	0.247742	0.281897	0.312437	0.362282	0.418135	0.497286	0.589425	0.67568	0.838568	1.12292	1.33773	1.53758	1.75429	1.95366	2.35988	3.11039	6.49194
0	0	0.025301	0.0478925	0.0702875	0.102092	0.12465	0.158369	0.190961	0.213569	0.247886	0.282808	0.312451	0.3623	0.418631	0.497548	0.589847	0.675786	0.839433	1.12299	1.33849	1.53928	1.75588	1.95572	2.36755	3.11301	6.63406
0	0	0.0253518	0.0482037	0.0708946	0.102286	0.124662	0.158451	0.191032	0.213772	0.247924	0.28323	0.312507	0.362633	0.419703	0.499496	0.590174	0.679452	0.839964	1.12347	1.33965	1.54595	1.75873	1.96683	2.37556	3.11358	6.87514
0	0	0.0256357	0.0483374	0.0709683	0.102683	0.124959	0.158633	0.191188	0.213931	0.248047	0.283585	0.31301	0.362898	0.419717	0.500079	0.591236	0.680283	0.841029	1.12355	1.34107	1.54606	1.76133	1.96826	2.37609	3.11515	6.91452
0	0	0.0260735	0.0484802	0.0719533	0.102947	0.125347	0.158854	0.191326	0.214494	0.248047	0.283761	0.313184	0.363133	0.420784	0.50084	0.591274	0.680829	0.842018	1.12516	1.3414	1.54682	1.76532	1.9711	2.37878	3.11801	6.93095
0	0	0.0262988	0.0488754	0.0722294	0.10353	0.125679	0.159014	0.191541	0.214563	0.248047	0.284485	0.313445	0.363898	0.420804	0.50085	0.593278	0.681694	0.845006	1.12607	1.34496	1.54699	1.76951	1.97314	2.40025	3.13757	7.0584
0	0	0.0263633	0.048948	0.0728359	0.103939	0.125819	0.159073	0.193295	0.214571	0.248047	0.285405	0.314233	0.365174	0.42464	0.501408	0.593828	0.682443	0.850223	1.12776	1.34674	1.54772	1.76987	1.98113	2.40892	3.14416	7.05954
0	0	0.0263747	0.0491191	0.0733147	0.104273	0.126085	0.159076	0.193308	0.214774	0.248047	0.285429	0.314673	0.366606	0.424939	0.501546	0.595101	0.686356	0.850693	1.12779	1.3478	1.54817	1.77058	1.9831	2.43333	3.14488	7.23672
0	0	0.026394	0.0492436	0.0735413	0.104329	0.126115	0.15908	0.193484	0.214842	0.248047	0.285473	0.315048	0.366714	0.425143	0.501693	0.595206	0.686492	0.851065	1.12842	1.35	1.55145	1.77521	1.98438	2.43372	3.15152	7.29528
0	0	0.0264391	0.0498571	0.0736572	0.104386	0.126451	0.159592	0.19368	0.215072	0.248047	0.285492	0.315476	0.367072	0.42583	0.503345	0.595248	0.687709	0.85212	1.13159	1.35029	1.55283	1.77681	1.98438	2.43676	3.16315	7.46205
0	0	0.0265122	0.0504062	0.0740036	0.104833	0.126604	0.16081	0.193706	0.215333	0.248047	0.28557	0.315924	0.367454	0.425956	0.505895	0.597191	0.689656	0.854635	1.13265	1.35281	1.55594	1.77904	1.98438	2.44129	3.17098	7.48862
0	0	0.0270715	0.0506942	0.0741543	0.105451	0.127029	0.161315	0.194171	0.215825	0.248047	0.285989	0.317142	0.367979	0.426186	0.506896	0.597346	0.69188	0.856171	1.13735	1.35571	1.55795	1.78164	1.98438	2.44298	3.17541	7.50623
0	0	0.0272547	0.050808	0.0743363	0.10552	0.127614	0.161543	0.194622	0.216019	0.248047	0.286319	0.317664	0.369068	0.426461	0.50726	0.598108	0.692264	0.857601	1.14446	1.35638	1.55819	1.78397	1.98438	2.44735	3.18213	7.58878
0	0	0.0272606	0.050852	0.0744325	0.105847	0.12771	0.161928	0.194988	0.216704	0.248047	0.287326	0.318356	0.369157	0.426655	0.511282	0.598891	0.69353	0.859109	1.14453	1.35787	1.55926	1.78624	1.98484	2.45255	3.18267	7.60029
0	0	0.0273052	0.0514948	0.0748154	0.105977	0.127854	0.162138	0.195103	0.217106	0.248047	0.287384	0.318417	0.369921	0.427416	0.511289	0.599288	0.69353	0.859377	1.14802	1.35855	1.56603	1.78869	1.99982	2.46313	3.1851	7.63523
0	0	0.0274228	0.0515128	0.0748563	0.106104	0.128227	0.162406	0.195345	0.217127	0.248047	0.287522	0.318734	0.370316	0.427504	0.512675	0.600276	0.693627	0.861233	1.14824	1.35956	1.56692	1.78869	2.00037	2.46591	3.1901	7.64129
0	0	0.0277325	0.0515414	0.0750933	0.106541	0.128538	0.162509	0.19566	0.217791	0.248047	0.287954	0.318771	0.370747	0.428209	0.512902	0.603669	0.694935	0.861301	1.14865	1.35989	1.56879	1.78958	2.00338	2.48047	3.19867	7.6909
0	0	0.0278059	0.0520088	0.0751451	0.106566	0.12873	0.162705	0.196164	0.218045	0.248047	0.288089	0.318844	0.371322	0.430129	0.51587	0.605119	0.695174	0.865858	1.14982	1.36139	1.57241	1.79441	2.00668	2.48047	3.20233	7.93072
0	0	0.0282994	0.0520563	0.0752321	0.106601	0.128792	0.162903	0.196332	0.218086	0.248047	0.288861	0.320749	0.371968	0.43043	0.516104	0.605784	0.695304	0.866363	1.15125	1.36139	1.57516	1.79488	2.01083	2.48047	3.21832	8.00963
0	0	0.0283165	0.0528088	0.075448	0.106669	0.128874	0.163541	0.19687	0.218624	0.248047	0.289021	0.321156	0.372364	0.43145	0.517079	0.608529	0.696011	0.866979	1.15126	1.36437	1.57646	1.80207	2.01495	2.48047	3.22802	8.12744
0	0	0.0285023	0.0528334	0.0757092	0.106806	0.129024	0.163684	0.197177	0.218657	0.248047	0.28908	0.321911	0.374951	0.431969	0.51814	0.608588	0.696222	0.867691	1.15323	1.3652	1.57776	1.80598	2.01818	2.48657	3.23135	8.46458
0	0	0.0286303	0.0529828	0.0759156	0.106811	0.129245	0.164394	0.197189	0.219187	0.248047	0.289682	0.322383	0.37518	0.432356	0.51908	0.609144	0.697232	0.8679	1.15349	1.36596	1.58057	1.8102	2.02186	2.48734	3.24025	8.55513
0	0	0.0289535	0.0532783	0.0759562	0.106843	0.129537	0.164686	0.197322	0.219415	0.248047	0.289745	0.323742	0.375986	0.432357	0.519251	0.609779	0.700102	0.869184	1.15526	1.36927	1.58217	1.81021	2.02245	2.49284	3.24026	8.70807
0	0	0.0290903	0.053985	0.0760807	0.106859	0.129595	0.164763	0.197383	0.219443	0.248047	0.290044	0.32393	0.3761	0.432394	0.519848	0.611166	0.701411	0.869589	1.1576	1.37016	1.58361	1.81321	2.02426	2.49284	3.24029	8.72509
0	0	0.0300137	0.0546666	0.0762857	0.107049	0.12962	0.164898	0.197438	0.220688	0.248047	0.291015	0.325204	0.377103	0.43245	0.521704	0.613121	0.702159	0.871373	1.15793	1.37347	1.58707	1.81401	2.03507	2.49721	3.2411	8.75238
0	0	0.0300468	0.0547038	0.0767092	0.107049	0.130264	0.164923	0.198667	0.22095	0.248047	0.291055	0.325551	0.377553	0.432637	0.524076	0.613233	0.703837	0.874739	1.15918	1.3759	1.58827	1.81691	2.03634	2.49923	3.24306	8.79201
0	0	0.0302084	0.0548162	0.0769723	0.107095	0.130514	0.164981	0.198789	0.221003	0.248047	0.291598	0.327689	0.37771	0.432916	0.524147	0.614769	0.704098	0.878237	1.15977	1.37728	1.58827	1.81797	2.03806	2.50202	3.26439	8.81881
0	0	0.0302457	0.0549005	0.0776237	0.107363	0.130533	0.165166	0.198873	0.221251	0.248047	0.292885	0.327979	0.379568	0.435739	0.524352	0.616939	0.705046	0.881531	1.16045	1.37845	1.58827	1.81925	2.03894	2.50206	3.27207	8.89224
0	0	0.0302788	0.0549161	0.0780072	0.107443	0.130548	0.166588	0.199171	0.221337	0.248047	0.293017	0.328336	0.379578	0.435984	0.524439	0.617345	0.705203	0.881674	1.16165	1.37914	1.59131	1.8194	2.03894	2.5065	3.27584	9.0041
0	0	0.0314182	0.0549782	0.0783319	0.107446	0.130961	0.166779	0.199492	0.22142	0.248047	0.293227	0.330712	0.379717	0.437662	0.52492	0.61869	0.706435	0.884055	1.16221	1.38264	1.59556	1.82109	2.0427	2.50689	3.28315	9.01038
0	0	0.0317853	0.0552269	0.0786323	0.107474	0.13098	0.166802	0.199499	0.221501	0.248047	0.293294	0.330965	0.380161	0.438627	0.528381	0.618867	0.707909	0.884513	1.16403	1.38322	1.60041	1.82274	2.05604	2.51367	3.29306	9.16702
0	0	0.0318074	0.0552608	0.0787808	0.107479	0.130991	0.166914	0.200116	0.221575	0.248047	0.293587	0.331358	0.380214	0.438627	0.528997	0.620312	0.70832	0.884598	1.16758	1.38539	1.60077	1.82351	2.0581	2.51565	3.29592	9.23692
0	0	0.0320006	0.0552807	0.0790685	0.107686	0.131223	0.16792	0.200581	0.221898	0.248047	0.293864	0.33141	0.380664	0.438627	0.529197	0.620312	0.70978	0.885328	1.16773	1.38693	1.60111	1.82673	2.05824	2.52315	3.33581	9.35457
0	0	0.0320412	0.0553064	0.0793683	0.107899	0.131575	0.168271	0.200765	0.222101	0.24894	0.293891	0.331597	0.381711	0.440868	0.52966	0.620312	0.710042	0.887575	1.16838	1.38754	1.60133	1.82725	2.0591	2.52839	3.37251	9.48192
0	0	0.0322762	0.055325	0.0795656	0.108154	0.131832	0.168352	0.200787	0.222123	0.250084	0.293891	0.332749	0.381824	0.441533	0.529753	0.620312	0.710556	0.88901	1.16846	1.39026	1.60436	1.82766	2.06021	2.54231	3.38568	9.52171
0	0	0.0326467	0.0557663	0.0797317	0.108226	0.132324	0.169218	0.201402	0.222243	0.250117	0.293891	0.332964	0.381931	0.44262	0.53078	0.620313	0.711299	0.891923	1.16946	1.39175	1.60442	1.82856	2.0622	2.54356	3.4218	9.54638
0	0	0.0327807	0.0560092	0.0801341	0.108506	0.132595	0.169595	0.202261	0.222448	0.250831	0.293891	0.333459	0.38256	0.443233	0.531436	0.620386	0.711888	0.892454	1.16951	1.39224	1.605	1.83115	2.06393	2.5538	3.42208	9.55932
0	0	0.0330171	0.0560161	0.0808253	0.108714	0.13338	0.170261	0.202517	0.222495	0.251254	0.293891	0.334458	0.382638	0.444517	0.531557	0.620472	0.71506	0.893404	1.17305	1.39282	1.60504	1.83133	2.0643	2.55424	3.43968	9.67041
0	0	0.033034	0.0564372	0.0812081	0.10896	0.133385	0.170506	0.202687	0.22264	0.251666	0.293891	0.335402	0.382806	0.444939	0.531948	0.622007	0.71549	0.893423	1.17415	1.39389	1.60606	1.83337	2.07728	2.55564	3.44813	9.708
0	0	0.0334851	0.0564776	0.0819818	0.109029	0.133479	0.170773	0.202709	0.223059	0.251692	0.293891	0.335547	0.384864	0.445146	0.533065	0.622219	0.716405	0.894346	1.17781	1.39415	1.60711	1.83356	2.07854	2.55638	3.4572	9.90074
0	0	0.0339935	0.056532	0.0825748	0.109103	0.133676	0.17084	0.203095	0.223485	0.251869	0.293891	0.336201	0.384958	0.445846	0.53424	0.623437	0.717232	0.894346	1.17874	1.40022	1.60779	1.83534	2.08464	2.56018	3.48183	10.0453
0	0	0.0340187	0.0567975	0.0828256	0.109123	0.133692	0.170888	0.203164	0.224311	0.252402	0.293891	0.33658	0.38598	0.44722	0.535283	0.623437	0.717913	0.894757	1.17913	1.40103	1.60819	1.83627	2.08615	2.5686	3.48875	10.1171
0	0	0.0344598	0.0567979	0.0830919	0.109163	0.134171	0.171741	0.203427	0.224344	0.252407	0.293891	0.337311	0.386228	0.44767	0.535568	0.623437	0.719087	0.897704	1.17949	1.40273	1.6088	1.83669	2.08718	2.57096	3.50319	23.1907
0	0	0.0346907	0.0569839	0.0831217	0.109542	0.134639	0.171947	0.203585	0.224498	0.252586	0.293891	0.337605	0.387002	0.447738	0.536518	0.623438	0.722387	0.898167	1.18534	1.40317	1.609	1.83797	2.09202	2.58335	3.52733	23.3546
0	0	0.0347389	0.0571931	0.0832321	0.109583	0.134647	0.171949	0.203667	0.224522	0.25273	0.293891	0.337678	0.387114	0.44811	0.536811	0.623438	0.72259	0.899156	1.18542	1.40544	1.61204	1.83803	2.09802	2.58471	3.55748	23.4821
0	0	0.034815	0.0573349	0.0832711	0.109587	0.134782	0.172125	0.203706	0.225986	0.253596	0.294624	0.338126	0.387725	0.448381	0.537028	0.623438	0.723126	0.899611	1.1879	1.40926	1.61423	1.83834	2.10092	2.58969	3.56734	23.5684
0	0	0.0349766	0.057351	0.0833538	0.109686	0.134944	0.172176	0.203796	0.226137	0.253614	0.294707	0.338995	0.387784	0.448557	0.538666	0.623438	0.723558	0.900014	1.18905	1.41338	1.61806	1.83945	2.10304	2.59136	3.59504	23.6114
0	0	0.0350047	0.0574808	0.083386	0.109767	0.134952	0.172769	0.203912	0.226278	0.253989	0.294711	0.339029	0.38791	0.448906	0.53887	0.623438	0.725208	0.900797	1.18942	1.41419	1.6181	1.84251	2.10446	2.59186	3.60134	23.9978
0	0	0.0355247	0.0575193	0.0835639	0.110479	0.13512	0.172771	0.203989	0.22632	0.254496	0.295054	0.339094	0.389352	0.449348	0.540311	0.623438	0.726026	0.901049	1.19071	1.41535	1.61925	1.84311	2.10755	2.60308	3.62964	23.9978
0	0	0.0356362	0.0575995	0.0836601	0.110574	0.135227	0.17284	0.204188	0.226383	0.255377	0.295067	0.339101	0.389357	0.449799	0.54087	0.623438	0.731097	0.901886	1.19385	1.4166	1.62028	1.84557	2.11286	2.60713	3.63444	24.0925
0	0	0.036131	0.0576136	0.0836988	0.110794	0.135771	0.173204	0.204906	0.226572	0.255717	0.296822	0.33986	0.390833	0.450486	0.544587	0.623977	0.734032	0.902143	1.19469	1.41681	1.62318	1.84602	2.11403	2.61191	3.63949	24.2135
0	0	0.0362193	0.0576838	0.0837026	0.110851	0.135896	0.173545	0.205146	0.227365	0.255811	0.297315	0.340879	0.391229	0.450544	0.547025	0.624006	0.7343	0.904625	1.19531	1.41781	1.62553	1.84869	2.11473	2.62031	3.65337	24.4298
0	0	0.0363262	0.0579715	0.0839076	0.111125	0.135902	0.173577	0.205318	0.228509	0.256912	0.297426	0.341097	0.392053	0.450556	0.547791	0.624195	0.734389	0.904966	1.19712	1.41811	1.62806	1.85291	2.11931	2.62894	3.65983
0	0	0.036344	0.0580145	0.0840445	0.111621	0.135967	0.173732	0.205458	0.229118	0.256976	0.2982	0.341766	0.392202	0.450671	0.548117	0.624539	0.735995	0.906286	1.19728	1.41816	1.62986	1.85345	2.11931	2.63327	3.66229
0	0	0.0365164	0.0584011	0.0841199	0.112491	0.136224	0.173759	0.205459	0.229123	0.257324	0.298529	0.342348	0.393048	0.450741	0.549414	0.626489	0.736229	0.90714	1.19758	1.42054	1.63011	1.85887	2.1261	2.6341	3.69232
0	0	0.0367126	0.0584513	0.0843404	0.112628	0.136384	0.173988	0.205839	0.229141	0.257345	0.301072	0.342498	0.394526	0.450823	0.549601	0.626491	0.736267	0.907222	1.19816	1.42599	1.63168	1.8604	2.13327	2.64006	3.74683
0	0	0.0367888	0.0584807	0.0843745	0.112945	0.13665	0.174085	0.206624	0.229718	0.257383	0.301862	0.342817	0.395618	0.451899	0.549974	0.62815	0.736271	0.907792	1.19833	1.427	1.63193	1.8615	2.13378	2.64062	3.75227
0	0	0.0371195	0.058498	0.0844024	0.1133	0.136688	0.174155	0.207432	0.229786	0.258534	0.302111	0.342839	0.395877	0.452115	0.551237	0.62857	0.737058	0.908106	1.19948	1.42819	1.63741	1.86336	2.13569	2.65409	3.75337
0	0	0.0375006	0.0589856	0.0848792	0.113622	0.136733	0.174361	0.207812	0.230203	0.259346	0.303223	0.343164	0.396083	0.452301	0.551902	0.628595	0.737709	0.911303	1.20348	1.43016	1.64883	1.86552	2.13672	2.65806	3.78207
0	0	0.037904	0.0591639	0.0852042	0.113657	0.136766	0.174536	0.207812	0.230411	0.260464	0.303549	0.343268	0.396546	0.452374	0.552421	0.633092	0.737992	0.915931	1.20352	1.43394	1.6503	1.86682	2.14261	2.66388	3.80482
0	0	0.0381319	0.0594955	0.0852311	0.114018	0.136782	0.175006	0.207812	0.230848	0.260587	0.303937	0.343704	0.396782	0.452408	0.553453	0.633829	0.738166	0.915948	1.20467	1.43454	1.65263	1.8727	2.14333	2.66519	3.82842
0	0	0.0381654	0.0595226	0.0853087	0.114367	0.13696	0.175007	0.207812	0.231052	0.261445	0.304299	0.345248	0.398746	0.452886	0.554132	0.635428	0.739835	0.916206	1.20655	1.43789	1.65404	1.87578	2.14923	2.67414	3.84637
0	0	0.03874	0.0598504	0.0853872	0.114944	0.137291	0.175602	0.207812	0.23177	0.261601	0.304644	0.345432	0.398908	0.455395	0.554466	0.635712	0.744109	0.918567	1.207	1.44042	1.65805	1.87906	2.15307	2.68285	3.85345
0	0	0.0387849	0.0614091	0.0855604	0.115332	0.137317	0.176203	0.207812	0.232002	0.262268	0.304943	0.345955	0.398968	0.456285	0.55465	0.636561	0.744141	0.921721	1.20719	1.44089	1.66095	1.88289	2.15559	2.69129	3.87748
0	0	0.0392767	0.0614696	0.085587	0.115923	0.137553	0.176684	0.207812	0.232755	0.262442	0.305962	0.346086	0.399237	0.457446	0.55465	0.637819	0.744141	0.921856	1.20751	1.44101	1.66395	1.88606	2.16372	2.69716	3.88059
0	0	0.0395111	0.0620069	0.0858826	0.116059	0.137909	0.17751	0.207812	0.233241	0.262539	0.306546	0.346351	0.399489	0.457486	0.55465	0.638065	0.744141	0.924397	1.20818	1.44211	1.66395	1.88648	2.16459	2.71245	3.88516
0	0	0.0397935	0.0620394	0.0864942	0.117183	0.138074	0.177855	0.207812	0.233561	0.263863	0.306602	0.346654	0.400085	0.45759	0.55465	0.638234	0.744141	0.927643	1.2153	1.44241	1.66395	1.8867	2.16605	2.71698	3.92197
0	0	0.0402081	0.0620446	0.0866133	0.117364	0.138282	0.178312	0.207812	0.233733	0.264656	0.306679	0.346755	0.40245	0.458071	0.55465	0.640963	0.744141	0.929366	1.21534	1.44306	1.66482	1.88817	2.1672	2.71766	3.98114
0	0	0.0403734	0.0623158	0.0866996	0.117535	0.138832	0.178831	0.207812	0.233896	0.264946	0.307483	0.346945	0.403221	0.459858	0.556067	0.644656	0.744296	0.929394	1.21563	1.44414	1.66963	1.88823	2.16988	2.72372	3.99273
0	0	0.0406677	0.062321	0.0867322	0.118075	0.139445	0.179383	0.207812	0.233981	0.265742	0.307621	0.347319	0.403701	0.459892	0.556138	0.645257	0.744846	0.930469	1.21617	1.44514	1.67084	1.88877	2.18355	2.72786	4.01281
0	0	0.0406708	0.0624521	0.0867505	0.118199	0.139501	0.179568	0.207812	0.235113	0.266089	0.307663	0.34747	0.404972	0.459939	0.557008	0.645755	0.74722	0.930469	1.21699	1.44635	1.67285	1.88907	2.18899	2.72994	4.02075
0	0	0.0406797	0.0628007	0.0867644	0.11823	0.139517	0.180907	0.207812	0.235385	0.266484	0.308376	0.349072	0.405587	0.460635	0.558921	0.6467	0.747552	0.930469	1.21786	1.44635	1.67384	1.88907	2.19891	2.73575	4.02789
0	0	0.0407022	0.063032	0.0873133	0.118372	0.139854	0.181039	0.207812	0.235517	0.266663	0.308746	0.349081	0.405944	0.460637	0.559313	0.647649	0.748897	0.93114	1.22412	1.44709	1.67725	1.89104	2.19946	2.74949	4.16143
0	0	0.041018	0.0630382	0.0873552	0.118381	0.140409	0.18143	0.207812	0.235919	0.266835	0.308932	0.349587	0.406305	0.462341	0.559419	0.649761	0.749102	0.931545	1.22516	1.44728	1.68009	1.89963	2.20341	2.75462	4.16649
0	0	0.0410385	0.0633604	0.0877838	0.118448	0.140476	0.182143	0.207812	0.235975	0.266943	0.310054	0.350067	0.406927	0.463245	0.560606	0.65221	0.749279	0.9319	1.2271	1.44784	1.68024	1.90294	2.20726	2.75463	4.18268
0	0	0.0412555	0.0635897	0.0881346	0.118922	0.140513	0.182388	0.207812	0.23604	0.267014	0.310156	0.351225	0.407519	0.464256	0.560902	0.65235	0.754213	0.932311	1.22744	1.44856	1.68114	1.90331	2.22869	2.76792	4.18704
0	0	0.0413428	0.0636215	0.0882595	0.119125	0.140605	0.182518	0.207812	0.236211	0.267961	0.310156	0.351773	0.407964	0.464376	0.561075	0.652983	0.754425	0.932385	1.22957	1.44904	1.68168	1.90891	2.23007	2.76829	4.22409
0	0	0.04137	0.0640401	0.0884768	0.119417	0.140639	0.182716	0.207812	0.236494	0.268053	0.310156	0.351825	0.408243	0.464683	0.561882	0.653485	0.755004	0.933038	1.23158	1.44919	1.68433	1.90945	2.23242	2.77177	4.24588
0	0	0.0414801	0.0641547	0.0884873	0.119645	0.141329	0.18295	0.207812	0.236778	0.269227	0.310156	0.352301	0.410503	0.464683	0.562338	0.654495	0.756383	0.933088	1.23198	1.45187	1.685	1.91219	2.23242	2.77325	4.24681
0	0	0.0416022	0.0643895	0.0887517	0.119667	0.141813	0.183143	0.207812	0.237225	0.269874	0.310156	0.35262	0.41159	0.464683	0.563915	0.65575	0.756438	0.934332	1.23273	1.45278	1.68744	1.91513	2.23508	2.77325	4.30949
0	0	0.0416506	0.0643938	0.0890456	0.120012	0.142011	0.183211	0.207812	0.237373	0.270458	0.310156	0.352762	0.411757	0.464683	0.564155	0.656506	0.758302	0.936083	1.23282	1.45296	1.69331	1.92181	2.25712	2.77325	4.34696
0	0	0.0417795	0.0646548	0.0895978	0.120507	0.14218	0.18348	0.207812	0.238396	0.271353	0.310156	0.352799	0.412456	0.464683	0.564889	0.657001	0.75982	0.936575	1.23529	1.45824	1.69496	1.92502	2.26319	2.77553	4.4587
0	0	0.0418941	0.0648603	0.0897809	0.120549	0.142286	0.183783	0.207812	0.238741	0.271608	0.310156	0.353633	0.41278	0.464683	0.565019	0.657161	0.763401	0.936861	1.23722	1.45957	1.69503	1.93012	2.27093	2.77582	4.46484
0	0	0.0420745	0.0650434	0.0899684	0.120583	0.142564	0.183984	0.207812	0.23947	0.271663	0.310156	0.353875	0.412847	0.464683	0.566958	0.657161	0.764124	0.936921	1.23793	1.46491	1.69529	1.93283	2.28688	2.77593	4.47558
0	0	0.0423785	0.0651389	0.0900055	0.120832	0.142973	0.184115	0.207812	0.239611	0.271722	0.310156	0.353909	0.413897	0.464683	0.568686	0.660349	0.764149	0.939501	1.24023	1.46669	1.69534	1.93731	2.28688	2.7809	4.55224
0	0	0.0425697	0.0655076	0.0903291	0.12084	0.143044	0.184157	0.207812	0.239695	0.271745	0.310156	0.35393	0.41489	0.464683	0.570678	0.660457	0.764356	0.939707	1.24023	1.47068	1.69652	1.93731	2.30085	2.78246	4.55388
0	0	0.0430378	0.0656017	0.0905721	0.120879	0.143153	0.184254	0.207812	0.239943	0.271775	0.310156	0.353943	0.415625	0.464683	0.571168	0.66081	0.765349	0.94013	1.24023	1.47242	1.70525	1.93731	2.30551	2.78884	4.57376
0	0	0.0434896	0.0660438	0.0911545	0.120942	0.143248	0.184326	0.207812	0.239967	0.272306	0.310156	0.354512	0.415625	0.464683	0.571852	0.661416	0.766001	0.940859	1.24073	1.47346	1.70873	1.94108	2.31011	2.79822	4.62495
0	0	0.0436131	0.0660686	0.0913422	0.121085	0.14336	0.184881	0.207812	0.24016	0.272671	0.310156	0.354556	0.415625	0.464683	0.572036	0.662069	0.766261	0.942065	1.24264	1.47368	1.70922	1.94355	2.31011	2.80028	4.6339
0	0	0.0436938	0.0661771	0.0913864	0.121271	0.144861	0.18498	0.207812	0.240179	0.273404	0.310156	0.355595	0.415625	0.465571	0.573186	0.662219	0.767369	0.942234	1.24271	1.47621	1.71187	1.94361	2.32986	2.80268	4.6339
0	0	0.0439381	0.0664683	0.0913889	0.121593	0.145081	0.185513	0.207812	0.240431	0.273705	0.310156	0.356238	0.415625	0.466284	0.57332	0.663006	0.7677	0.94397	1.24305	1.47819	1.71286	1.95449	2.33135	2.80844	4.6821
0	0	0.0439838	0.0668862	0.0918319	0.121894	0.145316	0.185971	0.207812	0.240476	0.273751	0.310156	0.356445	0.415625	0.466631	0.573985	0.663578	0.76786	0.944014	1.24426	1.47849	1.71415	1.95726	2.34007	2.82656	4.68992
0	0	0.044289	0.0672212	0.0918465	0.121961	0.145347	0.18637	0.207812	0.241281	0.274036	0.310156	0.356524	0.415625	0.467976	0.574947	0.66439	0.769693	0.948622	1.24486	1.47958	1.72186	1.95931	2.34007	2.82817	4.70449
0	0	0.0445763	0.0672994	0.0925375	0.122373	0.145495	0.186438	0.207812	0.241513	0.275593	0.310156	0.358685	0.415625	0.469396	0.576757	0.666437	0.771117	0.949421	1.24872	1.48118	1.7281	1.97191	2.34007	2.83131	4.73661
0	0	0.0446141	0.0674854	0.0926284	0.122393	0.145721	0.186473	0.207812	0.24188	0.275685	0.310156	0.358764	0.415625	0.470702	0.578095	0.666641	0.772778	0.949804	1.24877	1.4829	1.73051	1.97391	2.34188	2.84509	4.78142
0	0	0.044774	0.0675411	0.0928254	0.122922	0.14578	0.186484	0.207812	0.242675	0.277222	0.310156	0.359113	0.415625	0.470845	0.578109	0.666941	0.772791	0.950444	1.25176	1.48367	1.73164	1.97408	2.34249	2.85314	4.80492
0	0	0.0450576	0.0676094	0.0932708	0.123097	0.145817	0.18663	0.207812	0.242757	0.277549	0.310156	0.359607	0.415625	0.47123	0.580232	0.66734	0.772882	0.954092	1.25304	1.48828	1.73188	1.97533	2.34979	2.86122	4.80493
0	0	0.0454672	0.0679378	0.094022	0.123362	0.146308	0.1867	0.207812	0.243703	0.277588	0.310156	0.359939	0.415625	0.471243	0.580352	0.668423	0.772956	0.955266	1.2566	1.48843	1.73375	1.97574	2.35842	2.86331	4.8093
0	0	0.046089	0.0679986	0.0951802	0.123385	0.146456	0.186746	0.207812	0.245122	0.277634	0.310156	0.360523	0.415625	0.471514	0.581324	0.668502	0.77331	0.955276	1.25779	1.49169	1.7348	1.97639	2.36883	2.88432	4.82687
0	0	0.0461729	0.06808	0.0952181	0.123736	0.147244	0.186801	0.207812	0.245539	0.277661	0.310156	0.360838	0.415625	0.472038	0.581589	0.669096	0.77418	0.956686	1.25898	1.49223	1.73557	1.97657	2.37742	2.90782	4.83205
0	0	0.04643	0.0682433	0.0953524	0.123947	0.147491	0.186905	0.207812	0.246403	0.277765	0.310156	0.360853	0.415625	0.472733	0.58237	0.669342	0.774544	0.959073	1.25965	1.49249	1.73559	1.98093	2.38575	2.91529	4.85792
0	0	0.0466249	0.0686144	0.0957963	0.12404	0.149245	0.187101	0.207812	0.246825	0.278303	0.310156	0.362845	0.415625	0.473183	0.583138	0.670535	0.774611	0.962809	1.26302	1.49443	1.73633	1.98438	2.38635	2.92089	4.87335
0	0	0.0466721	0.0690812	0.0957994	0.124348	0.149729	0.187291	0.207812	0.247163	0.27867	0.310156	0.363842	0.415625	0.473631	0.583543	0.671386	0.774656	0.962972	1.26399	1.49616	1.73633	1.98438	2.38822	2.9245	4.87335
0	0	0.046839	0.0691734	0.0958952	0.124392	0.149968	0.18731	0.207812	0.247707	0.278968	0.310156	0.364124	0.415625	0.473726	0.583723	0.67332	0.774923	0.963053	1.2648	1.49663	1.73856	1.98438	2.38897	2.92852	4.87335
0	0.000277325	0.0469228	0.0692005	0.0964536	0.124555	0.149968	0.18732	0.207812	0.247717	0.27918	0.310156	0.364485	0.415625	0.474423	0.584207	0.673766	0.776087	0.964198	1.2648	1.49909	1.73899	1.98438	2.39289	2.93407	4.87335
0	0.000350791	0.0469587	0.0693055	0.0964827	0.124639	0.15062	0.187381	0.207812	0.248047	0.279396	0.310156	0.364758	0.415625	0.474721	0.584497	0.674425	0.776956	0.965297	1.26498	1.49931	1.73951	1.98438	2.3938	2.96849	4.87479
0	0.00210929	0.0472273	0.069346	0.0965015	0.125101	0.150654	0.187901	0.207812	0.248047	0.279738	0.310156	0.364876	0.415625	0.476379	0.585565	0.674482	0.780313	0.965646	1.2656	1.50267	1.74163	1.98654	2.40564	2.97858	4.87807
0	0.0049571	0.0475223	0.0695769	0.0966112	0.125368	0.150698	0.188149	0.207812	0.248047	0.279896	0.310156	0.364894	0.415625	0.476557	0.586192	0.674774	0.781143	0.967325	1.26746	1.50335	1.74216	1.99307	2.41083	3.00053	4.89655
0	0.00682242	0.0475724	0.0695891	0.096835	0.125771	0.151108	0.1882	0.207812	0.248047	0.280677	0.310156	0.365857	0.415625	0.477887	0.586704	0.675214	0.781503	0.969207	1.27003	1.50525	1.74327	1.99982	2.41244	3.01194	4.91542
0	0.00727945	0.0476082	0.0696869	0.0968378	0.125916	0.151125	0.188238	0.207812	0.248047	0.282002	0.310156	0.365881	0.41644	0.478235	0.587728	0.677288	0.782012	0.973892	1.27093	1.50601	1.74542	2.00776	2.41597	3.012	4.93024
0	0.00970637	0.0476846	0.0697592	0.096969	0.126394	0.151142	0.188284	0.207812	0.248047	0.282108	0.310156	0.366647	0.416635	0.478259	0.587783	0.677742	0.782641	0.975945	1.27195	1.50713	1.74763	2.01113	2.41775	3.01467	4.93276
0	0.0102272	0.0479015	0.0702411	0.097161	0.126542	0.151177	0.188446	0.207812	0.248047	0.283335	0.310251	0.366861	0.418885	0.478513	0.587783	0.679198	0.782847	0.976277	1.27288	1.50881	1.74766	2.0137	2.41934	3.02654	4.96094
0	0.0109502	0.0481826	0.0705002	0.0971765	0.126784	0.151178	0.18877	0.207812	0.248047	0.283864	0.312445	0.367235	0.419467	0.47936	0.587794	0.679571	0.783006	0.976857	1.27476	1.5131	1.75396	2.01469	2.42023	3.02952	5.00117
0	0.0120053	0.0482068	0.0707383	0.097252	0.12706	0.151212	0.189226	0.207812	0.248047	0.284339	0.313204	0.367549	0.419547	0.480205	0.588516	0.680075	0.78332	0.977859	1.27657	1.52403	1.75396	2.01709	2.44818	3.02956	5.00775
0	0.0122589	0.048338	0.0709522	0.0975281	0.127071	0.15168	0.189384	0.207812	0.248047	0.284771	0.313422	0.367969	0.419761	0.481198	0.59066	0.683757	0.784393	0.98017	1.27716	1.52574	1.75589	2.02094	2.44928	3.03524	5.09663
0	0.012289	0.0485883	0.0713935	0.0979051	0.127771	0.152006	0.189456	0.207812	0.248047	0.285166	0.31398	0.368011	0.420685	0.483475	0.590813	0.684402	0.784393	0.9808	1.2792	1.52828	1.75929	2.02111	2.45003	3.06262	5.11308
0	0.0123788	0.0486091	0.0714547	0.0980101	0.127828	0.152285	0.189495	0.207812	0.248047	0.285562	0.314865	0.368725	0.421077	0.485152	0.591877	0.684983	0.784393	0.980882	1.27987	1.53058	1.76575	2.02267	2.45619	3.07296	5.14042
0	0.0133122	0.0486566	0.0720058	0.0981463	0.128021	0.152346	0.190085	0.207812	0.248047	0.285794	0.316468	0.368994	0.421532	0.485423	0.592027	0.686935	0.784563	0.981202	1.28014	1.53376	1.76632	2.02327	2.45982	3.08037	5.17937
0	0.0134698	0.0493861	0.0720209	0.0984195	0.12804	0.153038	0.190622	0.207812	0.248047	0.286138	0.316716	0.370721	0.421831	0.486223	0.593468	0.687812	0.78601	0.982845	1.28018	1.5352	1.76673	2.02517	2.46372	3.11088	5.20596
0	0.0136339	0.0495947	0.0723209	0.0996634	0.128091	0.153768	0.190721	0.207812	0.248047	0.286213	0.317369	0.37088	0.421995	0.488549	0.594029	0.68907	0.78695	0.983546	1.28241	1.53554	1.76721	2.0313	2.46807	3.11287	5.21232
0	0.0141065	0.0496805	0.0725099	0.0999277	0.128276	0.154059	0.191079	0.207812	0.248047	0.286258	0.31778	0.371293	0.422014	0.488679	0.594716	0.689755	0.787128	0.984334	1.28355	1.54337	1.7679	2.03801	2.4692	3.12645	5.32505
0	0.0146017	0.0500133	0.0726693	0.10001	0.128348	0.154188	0.191234	0.207812	0.248047	0.286419	0.31786	0.37183	0.422294	0.489228	0.595574	0.690796	0.787898	0.987677	1.28618	1.55028	1.76929	2.04248	2.47046	3.12886	5.3546
0	0.0147874	0.0500271	0.0727454	0.100393	0.12851	0.155424	0.191789	0.207812	0.248047	0.286556	0.318783	0.372153	0.422389	0.490718	0.596728	0.692927	0.788466	0.989017	1.28686	1.55078	1.77003	2.04318	2.47767	3.13281	5.37796
0	0.0152388	0.0500307	0.0729896	0.100419	0.128553	0.155543	0.191978	0.207812	0.248047	0.28689	0.319204	0.372904	0.425287	0.491561	0.596948	0.693103	0.789394	0.991095	1.28795	1.55102	1.77072	2.0441	2.47789	3.13422	5.47079
0	0.0160331	0.0501117	0.0732181	0.100655	0.128618	0.156097	0.192768	0.207812	0.248047	0.287205	0.319415	0.373065	0.425579	0.492655	0.597459	0.693368	0.790375	0.99171	1.29026	1.55366	1.77785	2.04841	2.48047	3.14052	5.49151
0	0.0162736	0.0502348	0.0733053	0.10093	0.129005	0.156121	0.192986	0.207812	0.248047	0.287231	0.321258	0.374688	0.425769	0.493993	0.597853	0.69353	0.791005	0.991779	1.29739	1.55444	1.78238	2.05201	2.48047	3.14747	5.66756
0	0.0164466	0.0507407	0.0733173	0.101069	0.129085	0.156181	0.193189	0.207813	0.248047	0.28748	0.321504	0.374886	0.426668	0.494197	0.598265	0.694869	0.79235	0.992188	1.29754	1.56285	1.78363	2.05394	2.48047	3.15819	5.66927
0	0.0165695	0.050802	0.0733209	0.101626	0.129785	0.157113	0.19354	0.207813	0.248047	0.287926	0.321655	0.374891	0.426792	0.495058	0.598352	0.696361	0.793442	0.992188	1.29815	1.56891	1.78595	2.05695	2.48047	3.17673	5.69528
0	0.0167807	0.0508738	0.0736847	0.101653	0.129899	0.157226	0.193874	0.207813	0.248047	0.28793	0.321661	0.375067	0.426859	0.496094	0.598677	0.697144	0.794582	0.992188	1.29877	1.56905	1.78658	2.05849	2.48047	3.17748	5.72661
0	0.0169593	0.0508874	0.0740356	0.101698	0.1299	0.157983	0.193922	0.207813	0.248047	0.288128	0.322587	0.375819	0.428526	0.496094	0.599002	0.697178	0.796825	0.992188	1.29907	1.56961	1.78869	2.05932	2.48047	3.18679	5.763
0	0.0170181	0.050909	0.0743403	0.101939	0.129952	0.158093	0.194042	0.207813	0.248047	0.288497	0.322801	0.37655	0.429383	0.496094	0.599769	0.698971	0.797218	0.992188	1.30062	1.56973	1.78869	2.06627	2.48846	3.1901	5.82819
0	0.0171767	0.0513259	0.0744655	0.102556	0.130165	0.15817	0.194245	0.207813	0.248047	0.289083	0.3229	0.376961	0.429951	0.496094	0.600385	0.70002	0.797547	0.992508	1.30264	1.5699	1.79377	2.06825	2.49284	3.19063	5.83833
0	0.0175513	0.0515342	0.0744811	0.102935	0.130236	0.158854	0.194257	0.208009	0.248514	0.289238	0.323361	0.377164	0.430479	0.496094	0.600604	0.701142	0.797578	0.993263	1.30317	1.57409	1.79496	2.07046	2.49284	3.19475	5.84679
0	0.0177852	0.0515395	0.0746029	0.102954	0.130431	0.158854	0.194527	0.2081	0.248648	0.289335	0.32387	0.378495	0.430625	0.496094	0.600775	0.701583	0.798399	0.99872	1.30586	1.57445	1.80251	2.08561	2.49284	3.19972	5.8604
0	0.0178663	0.0516541	0.0748475	0.103442	0.130494	0.158854	0.194667	0.208457	0.248714	0.289745	0.324193	0.378795	0.430789	0.496094	0.602421	0.701957	0.798488	0.998769	1.30589	1.57745	1.80298	2.08628	2.49664	3.21592	5.88119
0	0.0179039	0.0517469	0.0751132	0.103447	0.130689	0.15906	0.195228	0.208541	0.249009	0.290221	0.324642	0.381458	0.430796	0.496324	0.603306	0.702515	0.798496	1.00194	1.3076	1.57985	1.80348	2.09163	2.50032	3.21927	5.96681
0	0.0181077	0.051764	0.0751771	0.103478	0.13078	0.159359	0.195297	0.209132	0.249808	0.291138	0.325235	0.381525	0.431879	0.497308	0.603702	0.702959	0.79879	1.0021	1.30779	1.58364	1.8081	2.09234	2.50119	3.22559	6.00429
0	0.0181091	0.0518726	0.0751944	0.103576	0.130819	0.159616	0.195341	0.2092	0.250228	0.29185	0.325253	0.381826	0.43192	0.498008	0.604285	0.703229	0.801447	1.00305	1.30807	1.58538	1.80822	2.09359	2.50599	3.22959	6.08094
0	0.0181865	0.0519599	0.0752241	0.103734	0.130846	0.159635	0.196023	0.209364	0.250926	0.29251	0.325999	0.384309	0.432079	0.498445	0.604413	0.703233	0.802935	1.00471	1.31052	1.58687	1.80832	2.09918	2.51133	3.23538	6.08094
0	0.0183291	0.0520637	0.075567	0.103762	0.131004	0.16022	0.196518	0.209781	0.251058	0.292669	0.326171	0.384387	0.432103	0.499748	0.604907	0.704606	0.803139	1.007	1.31082	1.58707	1.80888	2.10022	2.51462	3.2411	6.08948
0	0.0185223	0.052247	0.0755848	0.103781	0.131186	0.160319	0.196557	0.210037	0.251491	0.293146	0.327472	0.384731	0.433302	0.500498	0.605845	0.705494	0.803256	1.00783	1.31133	1.58827	1.81659	2.10263	2.51748	3.24982	6.14859
0	0.0187406	0.0522733	0.0759465	0.104382	0.131256	0.160671	0.197567	0.210104	0.251644	0.293447	0.32779	0.385377	0.433698	0.500726	0.605868	0.705936	0.803895	1.00867	1.31267	1.58827	1.81769	2.10525	2.51895	3.25724	6.15117
0	0.0190047	0.0523705	0.0759588	0.104458	0.131397	0.161552	0.197671	0.210155	0.251774	0.293891	0.327933	0.385496	0.434059	0.501854	0.606499	0.706064	0.804695	1.01008	1.31269	1.58902	1.81917	2.11097	2.51958	3.26273	6.15267
0	0.0190746	0.0525229	0.0760231	0.10457	0.131483	0.162239	0.197769	0.210295	0.253076	0.293891	0.328041	0.38551	0.434407	0.50214	0.607124	0.706138	0.805416	1.01117	1.31367	1.58923	1.82033	2.1125	2.53525	3.29413	6.3003
0	0.0192271	0.0527129	0.0763485	0.10461	0.131661	0.162539	0.198101	0.210507	0.253125	0.293891	0.329114	0.386111	0.435884	0.502975	0.607377	0.706199	0.806212	1.0112	1.31486	1.58926	1.82578	2.11316	2.53685	3.30936	6.31268
0	0.0194816	0.052823	0.0764403	0.104646	0.131707	0.162783	0.198537	0.210844	0.25439	0.293891	0.329573	0.386175	0.435909	0.502981	0.610782	0.707726	0.806276	1.01122	1.31558	1.5906	1.82714	2.11601	2.53934	3.32515	6.32398
0	0.0195048	0.0528581	0.0767997	0.104735	0.131735	0.162791	0.198831	0.211278	0.254443	0.293891	0.329644	0.386293	0.438627	0.503076	0.611534	0.708116	0.809089	1.01263	1.31759	1.59651	1.82982	2.11897	2.54295	3.32821	6.32398
0	0.0195541	0.0531321	0.0769221	0.10486	0.131736	0.163305	0.198922	0.211442	0.254604	0.293891	0.329761	0.386465	0.438835	0.503225	0.613342	0.708772	0.810718	1.01297	1.31935	1.59695	1.8299	2.11931	2.5524	3.32984	6.32398
0	0.0202466	0.0532528	0.0769669	0.105125	0.132355	0.163766	0.19912	0.21211	0.2547	0.293891	0.329863	0.386603	0.439476	0.503626	0.613631	0.709307	0.811372	1.01314	1.31953	1.59757	1.8324	2.12019	2.55352	3.33669	6.33515
0	0.0203557	0.0533606	0.077059	0.105199	0.132798	0.164228	0.199133	0.212964	0.254761	0.293891	0.330334	0.387266	0.440036	0.505008	0.615148	0.70952	0.813181	1.0142	1.32813	1.59877	1.83293	2.12048	2.5538	3.35254	6.34285
0	0.020368	0.0533873	0.077168	0.105371	0.132961	0.164464	0.199835	0.213353	0.254955	0.293891	0.331229	0.388287	0.441475	0.506493	0.616749	0.710341	0.814601	1.01518	1.32951	1.60153	1.8393	2.12797	2.5538	3.37993	6.43967
0	0.0204112	0.0534255	0.0772312	0.105725	0.13326	0.164655	0.201021	0.213815	0.255042	0.293891	0.331544	0.388697	0.441576	0.508086	0.616993	0.711325	0.816725	1.01735	1.32983	1.60304	1.84771	2.12987	2.5551	3.39105	6.56195
0	0.0204123	0.0534783	0.0772437	0.106036	0.133621	0.164846	0.201369	0.213836	0.255659	0.293891	0.331957	0.389548	0.441685	0.508121	0.617314	0.71218	0.817332	1.01784	1.33081	1.60311	1.85178	2.13378	2.55858	3.39527	6.64702
0	0.0205061	0.0536636	0.0772608	0.106137	0.133766	0.165099	0.201647	0.214156	0.255727	0.293891	0.331977	0.390057	0.443111	0.50821	0.617418	0.712372	0.81768	1.01917	1.33138	1.60512	1.85317	2.15219	2.56454	3.42927	6.69901
0	0.0207838	0.0541176	0.0774256	0.106334	0.133791	0.165252	0.202044	0.214251	0.255731	0.294207	0.332348	0.391105	0.44315	0.508496	0.617558	0.713401	0.818319	1.01947	1.33192	1.60936	1.85627	2.15594	2.56815	3.43818	6.85535
0	0.0210873	0.0542034	0.0778667	0.106414	0.133841	0.165978	0.202377	0.215045	0.256674	0.295029	0.332488	0.391699	0.443167	0.508631	0.618012	0.713782	0.818939	1.02053	1.33318	1.61008	1.8572	2.15818	2.57305	3.45124	6.87839
0	0.021418	0.0542753	0.0779484	0.107018	0.133949	0.166088	0.202553	0.215441	0.25679	0.295296	0.332894	0.39175	0.443563	0.510202	0.618159	0.713984	0.819078	1.02229	1.33577	1.61134	1.85895	2.16289	2.57496	3.4514	6.91869
0	0.0216029	0.0543939	0.0781048	0.107718	0.133982	0.166168	0.202754	0.215528	0.257401	0.295302	0.333032	0.391939	0.443588	0.510344	0.618614	0.715407	0.819756	1.02295	1.33577	1.61376	1.86076	2.16335	2.57926	3.4572	6.95036
0	0.0216988	0.0545547	0.0782111	0.107904	0.134146	0.166287	0.202825	0.215851	0.258397	0.295789	0.333327	0.392067	0.444096	0.510429	0.618739	0.715449	0.821452	1.02725	1.33577	1.61418	1.86174	2.16673	2.58181	3.46019	7.03334
0	0.0218215	0.0549469	0.078231	0.107955	0.134203	0.166374	0.20291	0.216143	0.259187	0.29582	0.333476	0.393284	0.444161	0.510783	0.620312	0.716124	0.822555	1.03045	1.33577	1.61484	1.86325	2.17287	2.58262	3.47456	7.05425
0	0.0219297	0.0550707	0.0782819	0.107997	0.134266	0.166838	0.203265	0.21619	0.259366	0.296516	0.334309	0.393488	0.444221	0.511903	0.620312	0.717506	0.823154	1.03102	1.33577	1.62078	1.86364	2.17581	2.58969	3.47818	7.10298
0	0.0220435	0.0552676	0.0783731	0.107999	0.134278	0.167025	0.203282	0.216427	0.259729	0.296604	0.334344	0.394229	0.444428	0.512485	0.620312	0.71773	0.823553	1.03682	1.33698	1.62135	1.86397	2.17783	2.58969	3.48875	7.13132
0	0.0222061	0.0555975	0.0783773	0.108036	0.134586	0.167366	0.203653	0.21682	0.260573	0.297612	0.334599	0.395628	0.444994	0.514316	0.620312	0.717889	0.823689	1.03751	1.33722	1.62347	1.86509	2.17898	2.59315	3.4964	7.16049
0	0.022465	0.0558289	0.0784272	0.108093	0.134603	0.167522	0.20392	0.216937	0.26094	0.297638	0.335638	0.395885	0.445593	0.514653	0.620312	0.718187	0.823892	1.03786	1.34489	1.62935	1.8686	2.1946	2.60187	3.51296	7.21222
0	0.022897	0.055926	0.078475	0.108226	0.134626	0.168174	0.205446	0.216987	0.26122	0.297746	0.335847	0.396467	0.445891	0.514737	0.620312	0.718731	0.825046	1.03906	1.34666	1.63135	1.86909	2.19894	2.60543	3.51352	7.26599
0	0.0232926	0.0560625	0.0787037	0.108429	0.134689	0.168497	0.20558	0.21793	0.261346	0.298188	0.336023	0.396495	0.446591	0.515129	0.620313	0.719105	0.825506	1.03906	1.34673	1.63353	1.87252	2.20016	2.62193	3.5171	7.27197
0	0.0232996	0.0561856	0.0788305	0.108641	0.134737	0.168598	0.205825	0.217935	0.261689	0.298259	0.336303	0.396832	0.446636	0.517636	0.620313	0.720081	0.826535	1.03906	1.34724	1.6341	1.87264	2.21422	2.62335	3.53797	7.29949
0	0.0234312	0.0562686	0.0789831	0.108826	0.135147	0.169287	0.205884	0.217952	0.262053	0.298402	0.336849	0.397186	0.44732	0.517637	0.620313	0.720118	0.826979	1.04132	1.34866	1.63466	1.878	2.2186	2.63403	3.55591	7.45171
0	0.0235791	0.0562948	0.0790018	0.108895	0.135526	0.169309	0.205998	0.218388	0.262553	0.298467	0.336889	0.397481	0.447461	0.518242	0.620317	0.721162	0.827598	1.04142	1.34883	1.6354	1.88029	2.21956	2.63853	3.56242	7.49637
0	0.023728	0.0565991	0.0791985	0.109037	0.135567	0.169561	0.2061	0.218582	0.263031	0.298618	0.337207	0.39775	0.447782	0.518583	0.620875	0.721792	0.828131	1.0453	1.34955	1.6402	1.88301	2.22643	2.64466	3.58897	7.54405
0	0.0237857	0.0567277	0.0794274	0.109171	0.135597	0.171019	0.206188	0.219089	0.263491	0.29978	0.337617	0.397786	0.449551	0.518742	0.621466	0.722727	0.828174	1.04625	1.35068	1.64028	1.88991	2.23242	2.64577	3.59983	7.54405
0	0.0244127	0.056759	0.0794355	0.109243	0.135598	0.171357	0.206357	0.219642	0.263882	0.299963	0.337847	0.39785	0.449599	0.519053	0.621623	0.72464	0.829303	1.05362	1.35253	1.64193	1.89087	2.23242	2.65519	3.61001	7.71158
0	0.024652	0.0567758	0.079527	0.109312	0.135613	0.171477	0.206838	0.219661	0.263919	0.300569	0.338089	0.398968	0.449626	0.520728	0.622102	0.724987	0.829902	1.05449	1.35635	1.64275	1.89439	2.23242	2.65876	3.61421	7.72962
0	0.0247379	0.0571114	0.0802198	0.109392	0.13687	0.171503	0.207	0.219838	0.263981	0.301154	0.338439	0.400212	0.449906	0.521155	0.622313	0.727613	0.830525	1.0555	1.35661	1.64829	1.89995	2.23242	2.66026	3.63195	7.99248
0	0.0260282	0.057172	0.0806903	0.109562	0.136894	0.172164	0.207327	0.220289	0.264141	0.301202	0.338681	0.400352	0.449938	0.521743	0.623135	0.728987	0.83125	1.05571	1.35689	1.65249	1.9083	2.23509	2.66447	3.65713	8.19861
0	0.0262082	0.0575058	0.0808635	0.109695	0.136995	0.172582	0.207812	0.220375	0.264285	0.301885	0.338956	0.400764	0.450154	0.522217	0.623437	0.729062	0.83125	1.0587	1.35709	1.65485	1.90909	2.23539	2.66692	3.67364	8.20441
0	0.0264202	0.0576383	0.0809276	0.109718	0.137245	0.172585	0.207812	0.220481	0.265448	0.302706	0.339757	0.400776	0.450589	0.52223	0.623437	0.729635	0.83125	1.05964	1.35794	1.65623	1.91261	2.23708	2.66904	3.67472	8.3874
0	0.0264914	0.0577424	0.0809574	0.110037	0.137365	0.173148	0.207812	0.221289	0.265544	0.303336	0.339913	0.401057	0.450606	0.522433	0.623438	0.729997	0.83125	1.06037	1.3602	1.65838	1.91332	2.24616	2.66921	3.70391	8.41532
0	0.0265685	0.0581231	0.0811819	0.110221	0.137475	0.173386	0.207812	0.222629	0.265863	0.303365	0.340525	0.40146	0.450964	0.522464	0.623438	0.730674	0.83125	1.0607	1.36213	1.66023	1.91677	2.24845	2.67258	3.71292	8.41817
0	0.0265756	0.0581657	0.0812682	0.110283	0.137822	0.173427	0.207812	0.223452	0.266057	0.304025	0.340701	0.401989	0.452019	0.522883	0.623438	0.730895	0.83125	1.06097	1.36367	1.66166	1.91761	2.25375	2.67992	3.7136	8.58519
0	0.0266775	0.0582384	0.0815107	0.110528	0.138195	0.173832	0.207812	0.223654	0.266078	0.304109	0.341156	0.402469	0.452986	0.523679	0.623438	0.730904	0.831892	1.06463	1.36392	1.66245	1.91839	2.25618	2.68856	3.72178	8.61417
0	0.026733	0.0585405	0.0815146	0.111447	0.138263	0.174094	0.207812	0.22381	0.266106	0.304533	0.341709	0.402981	0.454907	0.52438	0.623438	0.731246	0.832747	1.06504	1.36459	1.66454	1.92086	2.25879	2.69038	3.73315	8.62931
0	0.0269887	0.0586202	0.0816271	0.111495	0.138305	0.1741	0.207812	0.224353	0.266491	0.305039	0.341886	0.403509	0.456699	0.524686	0.623438	0.731519	0.832979	1.06523	1.3664	1.66624	1.92353	2.25957	2.69954	3.74033	8.66596
0	0.0275447	0.0589725	0.081649	0.111601	0.138941	0.174526	0.207812	0.224563	0.267159	0.30505	0.34239	0.404035	0.457161	0.524942	0.623438	0.732328	0.833713	1.06771	1.36906	1.66667	1.9245	2.26222	2.70042	3.74145	8.74103
0	0.0275547	0.0591091	0.0817638	0.111683	0.139034	0.17484	0.207812	0.224718	0.267441	0.305284	0.343369	0.405398	0.457358	0.526259	0.623438	0.732735	0.834116	1.06796	1.36977	1.67073	1.92652	2.27094	2.70763	3.74473	8.7702
0	0.0277325	0.0592896	0.0819816	0.111788	0.139085	0.174874	0.207812	0.225326	0.26905	0.305763	0.344366	0.40602	0.45762	0.526453	0.623438	0.733455	0.834671	1.06975	1.37056	1.67514	1.93001	2.27275	2.7108	3.75363	8.7958
0	0.0280619	0.05933	0.0823549	0.111896	0.139512	0.174986	0.207812	0.226249	0.269248	0.306697	0.344502	0.406168	0.458832	0.526963	0.623678	0.734555	0.83493	1.07191	1.37477	1.67884	1.93654	2.27568	2.71907	3.77196	8.89476
0	0.0282757	0.059473	0.0825427	0.112173	0.139708	0.175008	0.207812	0.226254	0.269348	0.306734	0.34543	0.406914	0.458979	0.527717	0.624036	0.735162	0.835908	1.07311	1.37864	1.67911	1.93731	2.28205	2.72464	3.79155	8.91592
0	0.0290307	0.0594869	0.0830525	0.112299	0.139956	0.175109	0.207812	0.226458	0.269378	0.3068	0.345443	0.406915	0.459309	0.527737	0.62786	0.736036	0.837191	1.07313	1.37972	1.67916	1.93731	2.2843	2.73584	3.79439	8.919
0	0.0292309	0.0594881	0.0830869	0.11232	0.140074	0.175334	0.207812	0.22652	0.269449	0.307153	0.345476	0.407454	0.459802	0.528818	0.627932	0.736564	0.837315	1.07343	1.38096	1.6829	1.93802	2.28484	2.73788	3.80695	9.13576
0	0.0293526	0.0595958	0.0834442	0.112653	0.140142	0.175417	0.207812	0.226527	0.269603	0.307445	0.345498	0.40774	0.460452	0.530733	0.630006	0.739562	0.840011	1.07496	1.38171	1.6859	1.93882	2.28688	2.75022	3.81209	9.19482
0	0.0299459	0.0596557	0.0836141	0.112802	0.140614	0.175797	0.207812	0.22655	0.269991	0.308028	0.346456	0.408759	0.461508	0.530789	0.630619	0.739579	0.841426	1.075	1.38212	1.686	1.94103	2.29098	2.75627	3.83415	9.31265
0	0.0303509	0.0598021	0.0844369	0.11286	0.14081	0.176161	0.207812	0.226942	0.270073	0.309468	0.34703	0.409227	0.462609	0.53404	0.63068	0.741294	0.843303	1.07592	1.38583	1.68704	1.94306	2.29487	2.76468	3.85072	9.36778
0	0.0304266	0.0601801	0.0844797	0.113125	0.140873	0.176342	0.207812	0.229011	0.270337	0.309481	0.347801	0.409315	0.462648	0.53465	0.631303	0.741398	0.846185	1.0771	1.38626	1.6871	1.94491	2.2959	2.77238	3.85244	9.44555
0	0.0305231	0.0602594	0.084715	0.113207	0.140952	0.176512	0.207812	0.229518	0.270361	0.309591	0.348194	0.409686	0.462685	0.535823	0.631474	0.74184	0.846926	1.0774	1.38869	1.6939	1.946	2.29909	2.77325	3.85345	9.4598
0	0.0307648	0.06026	0.0847502	0.113231	0.140994	0.176525	0.207812	0.229639	0.270684	0.309807	0.349825	0.410276	0.463216	0.536656	0.632749	0.742336	0.846967	1.07773	1.3899	1.69547	1.95012	2.30622	2.77325	3.86361	9.48052
0	0.0307881	0.0603363	0.0848039	0.11328	0.141119	0.176847	0.207812	0.229952	0.271347	0.309824	0.349926	0.410331	0.464683	0.537748	0.633527	0.744141	0.847157	1.07883	1.39104	1.69743	1.95116	2.30859	2.77757	3.87748	9.58218
0	0.0308796	0.060488	0.0848535	0.113333	0.141515	0.176889	0.207812	0.22999	0.271874	0.310156	0.35012	0.410607	0.464683	0.538021	0.634464	0.744141	0.847233	1.08013	1.39127	1.69969	1.95713	2.30905	2.77794	3.88516	9.66533
0	0.0309872	0.0606473	0.0851582	0.113788	0.142254	0.17712	0.207812	0.230045	0.272305	0.310156	0.350324	0.410848	0.464683	0.538402	0.63465	0.744141	0.848259	1.08027	1.39227	1.70052	1.95723	2.32659	2.77904	3.92197	9.85381
0	0.0311553	0.0606723	0.085444	0.113869	0.14244	0.177296	0.207812	0.230338	0.272649	0.310156	0.350418	0.41143	0.464683	0.538544	0.635332	0.744141	0.849464	1.08041	1.39538	1.70261	1.95827	2.32869	2.78579	3.96282	10.0453
0	0.0313262	0.0606788	0.0857441	0.11393	0.142562	0.177654	0.207812	0.230391	0.272731	0.310156	0.350732	0.412101	0.464683	0.539207	0.635808	0.744141	0.851363	1.08107	1.39645	1.70542	1.97222	2.33442	2.79525	3.96607	10.0715
0	0.0318579	0.0606877	0.0861293	0.113994	0.142604	0.17771	0.207812	0.23067	0.272905	0.310156	0.350791	0.412957	0.464683	0.540505	0.635817	0.744141	0.852016	1.08127	1.39925	1.70655	1.97295	2.33954	2.79683	3.96862	22.1221
0	0.0319314	0.0607088	0.0865426	0.114086	0.143415	0.17773	0.207812	0.230775	0.273249	0.310156	0.351044	0.413122	0.464683	0.543484	0.636975	0.744141	0.852114	1.08141	1.40455	1.70767	1.97326	2.34007	2.80204	3.99402	22.3366
0	0.0319328	0.0607155	0.0866801	0.114307	0.143463	0.17777	0.207812	0.230808	0.273753	0.310156	0.351123	0.413686	0.464683	0.543828	0.637011	0.744141	0.852692	1.08162	1.40502	1.71621	1.97489	2.34007	2.81023	3.99701	22.4301
0	0.0319562	0.0608274	0.0867803	0.114372	0.143621	0.17781	0.207812	0.230904	0.273852	0.310156	0.351371	0.413905	0.464683	0.543869	0.637111	0.745542	0.852692	1.08194	1.4094	1.71809	1.97761	2.34007	2.81119	3.99964	22.4616
0	0.0323806	0.0609017	0.0868965	0.114477	0.143867	0.178259	0.207812	0.231195	0.274237	0.310156	0.351591	0.414439	0.465228	0.543883	0.637966	0.746568	0.856171	1.08435	1.40966	1.71965	1.98222	2.34007	2.81888	4.02323	22.5068
0	0.0324229	0.0611867	0.086912	0.114495	0.143937	0.17868	0.207812	0.231275	0.274239	0.310156	0.351747	0.41453	0.465757	0.544524	0.638172	0.747107	0.856367	1.08488	1.4108	1.72069	1.98363	2.34084	2.8194	4.06755	22.5886
0	0.0325984	0.0614275	0.0870512	0.114514	0.144124	0.17875	0.207812	0.231953	0.2743	0.310156	0.352468	0.415022	0.465906	0.544619	0.641315	0.747253	0.856833	1.08652	1.41286	1.72169	1.98438	2.34293	2.82486	4.09089	22.6389
0	0.0327443	0.0617428	0.0871754	0.114536	0.144361	0.17887	0.207812	0.232135	0.274335	0.310156	0.352861	0.415378	0.465935	0.544684	0.641438	0.747594	0.856833	1.0868	1.41343	1.72334	1.98438	2.35186	2.85324	4.12576	22.7474
0	0.03293	0.0617858	0.0871864	0.114612	0.144381	0.178912	0.207812	0.232756	0.274631	0.310156	0.352969	0.415625	0.466221	0.545152	0.642678	0.748748	0.857759	1.08706	1.41419	1.72458	1.98438	2.35379	2.85868	4.13625	22.7677
0	0.0330337	0.0617924	0.0872868	0.114946	0.144475	0.179535	0.207812	0.233798	0.275079	0.310156	0.353106	0.415625	0.466484	0.547726	0.643581	0.748991	0.858297	1.08896	1.41541	1.72799	1.98438	2.35904	2.86008	4.14113	22.7677
0	0.0332024	0.0619127	0.0876982	0.115378	0.1445	0.179701	0.207812	0.233814	0.275178	0.310156	0.353194	0.415625	0.467299	0.547782	0.644184	0.749279	0.860557	1.08933	1.41569	1.73046	1.98438	2.35931	2.86099	4.17974	22.7677
0	0.0333528	0.0619235	0.0879894	0.115401	0.144679	0.180201	0.207812	0.233873	0.27557	0.310156	0.353375	0.415625	0.467435	0.548467	0.644941	0.749279	0.86078	1.09198	1.41586	1.73105	1.98438	2.36888	2.8663	4.18823	22.7731
0	0.0335058	0.0619626	0.0880103	0.115465	0.144702	0.180254	0.207812	0.233888	0.275681	0.310156	0.353433	0.415625	0.467727	0.549109	0.64527	0.749279	0.861519	1.09295	1.41696	1.73157	1.98481	2.37147	2.86776	4.22259	22.8648
0	0.0337323	0.062206	0.088151	0.115525	0.145132	0.180409	0.207812	0.234748	0.276014	0.310156	0.353667	0.415625	0.467928	0.549247	0.645644	0.749279	0.863164	1.09333	1.41872	1.73255	1.99755	2.3727	2.87191	4.22409
0	0.033908	0.0622111	0.0881971	0.115819	0.145332	0.180449	0.207812	0.234825	0.276258	0.310156	0.353747	0.415625	0.468312	0.549729	0.647884	0.749279	0.864036	1.09366	1.42205	1.73633	1.99982	2.37352	2.87741	4.24795
0	0.0339185	0.062536	0.0885031	0.116253	0.145405	0.180754	0.207812	0.234927	0.276488	0.310156	0.35399	0.415625	0.468643	0.550389	0.648027	0.749279	0.86532	1.09403	1.42227	1.73633	1.99982	2.38153	2.87842	4.25072
0	0.0340001	0.0626512	0.0886781	0.116522	0.145589	0.180762	0.207812	0.235266	0.277465	0.310156	0.354395	0.415625	0.470475	0.551698	0.648093	0.749279	0.865969	1.09449	1.42553	1.7372	2.00045	2.38509	2.88907	4.26975
0	0.0341641	0.062785	0.0888554	0.116802	0.145745	0.180984	0.207812	0.235426	0.277529	0.310156	0.354506	0.415625	0.470548	0.552988	0.64892	0.749303	0.866512	1.09551	1.42976	1.74831	2.00668	2.38605	2.88927	4.29063
0	0.0341729	0.0629673	0.0889598	0.116824	0.145805	0.181101	0.207812	0.235846	0.27753	0.310156	0.354713	0.415625	0.470991	0.554055	0.650141	0.749377	0.866979	1.09808	1.43162	1.75365	2.00672	2.39281	2.89324	4.37928
0	0.0342181	0.0632483	0.0890489	0.116968	0.145849	0.181335	0.207812	0.236233	0.277773	0.310156	0.354879	0.415625	0.47109	0.554219	0.65017	0.749737	0.867702	1.09824	1.43389	1.75396	2.00729	2.39404	2.89727	4.3954
0	0.0342651	0.0632692	0.0891018	0.117391	0.145926	0.181415	0.207812	0.236312	0.278214	0.310156	0.355007	0.415625	0.471165	0.554519	0.650749	0.750232	0.868992	1.101	1.43443	1.75396	2.00878	2.39898	2.89934	4.3954
0	0.0342953	0.063273	0.0891919	0.118104	0.146107	0.181537	0.207812	0.236479	0.27822	0.310156	0.355137	0.415625	0.471511	0.55465	0.651252	0.750583	0.86998	1.10114	1.43469	1.75396	2.00946	2.40924	2.92112	4.3954
0	0.0343225	0.0636828	0.0892533	0.118307	0.146188	0.181615	0.207812	0.236743	0.278391	0.310156	0.356727	0.415625	0.471785	0.55465	0.652064	0.751803	0.871692	1.10159	1.43474	1.75396	2.01106	2.4118	2.92644	4.3954
0	0.0345055	0.0638422	0.0892627	0.118308	0.146295	0.181616	0.207812	0.23694	0.278751	0.310156	0.356966	0.415625	0.472073	0.555888	0.653231	0.751948	0.87197	1.10275	1.43552	1.75396	2.01162	2.41314	2.93836	4.4288
0	0.0346547	0.0638952	0.0893675	0.118705	0.147156	0.182128	0.207812	0.237005	0.279158	0.310156	0.35708	0.415625	0.473302	0.556489	0.653492	0.752021	0.874326	1.10462	1.43555	1.75396	2.01466	2.41996	2.97221	4.43457
0	0.0346756	0.0639789	0.0894941	0.119043	0.147358	0.182328	0.207812	0.237238	0.279424	0.310156	0.357833	0.415625	0.473709	0.556768	0.653884	0.752173	0.876288	1.10542	1.43708	1.75396	2.01611	2.42085	2.97442	4.46484
0	0.034731	0.0641493	0.0895736	0.119208	0.147464	0.18269	0.207812	0.237323	0.279762	0.310156	0.358256	0.415625	0.474225	0.557355	0.655772	0.752623	0.876813	1.1067	1.44248	1.75677	2.01737	2.42699	2.97558	4.48465
0	0.0350328	0.0642784	0.0897428	0.119625	0.147471	0.182736	0.207812	0.238228	0.279868	0.310156	0.358352	0.415625	0.474737	0.558178	0.656136	0.753646	0.877254	1.10695	1.4433	1.75726	2.02173	2.43132	2.9874	4.57376
0	0.0350791	0.0644407	0.0898507	0.119814	0.147521	0.183239	0.207812	0.238733	0.280329	0.310156	0.358641	0.415625	0.475516	0.558368	0.656577	0.755085	0.880349	1.10832	1.44378	1.75839	2.02243	2.43279	2.99132	4.58749
0	0.0350848	0.0646121	0.0899314	0.119821	0.147543	0.183247	0.207812	0.238777	0.280524	0.310156	0.359003	0.415625	0.475936	0.558429	0.657161	0.757568	0.880957	1.10838	1.44438	1.75901	2.02272	2.43591	2.99532	4.60447
0	0.0353423	0.0646544	0.0901275	0.11991	0.147867	0.183301	0.207812	0.239388	0.280784	0.310156	0.359538	0.415625	0.475996	0.559263	0.657161	0.757906	0.881194	1.10872	1.44635	1.76083	2.02653	2.43854	3.00085	4.6339
0	0.0355057	0.0646573	0.0904161	0.119939	0.148262	0.184028	0.207812	0.239706	0.281261	0.310156	0.360066	0.415625	0.476346	0.559551	0.657161	0.758312	0.881674	1.10967	1.44635	1.76579	2.02838	2.44298	3.01762	4.6339
0	0.0355403	0.0648359	0.0904915	0.120129	0.148639	0.184345	0.207812	0.240205	0.281601	0.310156	0.360691	0.415625	0.477342	0.559817	0.657161	0.758422	0.881674	1.11026	1.44635	1.76747	2.03015	2.44551	3.03991	4.65091
0	0.0355794	0.0649383	0.0912295	0.120209	0.148928	0.184398	0.207812	0.240299	0.28162	0.310156	0.360743	0.415625	0.478031	0.56051	0.657161	0.758989	0.882068	1.11099	1.44635	1.76814	2.03015	2.44876	3.05515	4.65269
0	0.0356293	0.0649893	0.0913111	0.120298	0.149647	0.184695	0.207812	0.240517	0.281991	0.310156	0.361045	0.415625	0.479392	0.560633	0.657161	0.760218	0.88262	1.11275	1.44635	1.76826	2.036	2.449	3.05763	4.72755
0	0.0356548	0.0650834	0.0921337	0.120399	0.149758	0.185329	0.207812	0.240863	0.282076	0.310156	0.361206	0.415625	0.479614	0.560728	0.657344	0.760405	0.883176	1.1141	1.44658	1.77229	2.04463	2.44932	3.05935	4.72974
0	0.0361002	0.0651851	0.0921422	0.120431	0.149765	0.185463	0.207812	0.241115	0.282229	0.310156	0.361424	0.415625	0.479841	0.560859	0.657587	0.761022	0.883717	1.11467	1.44999	1.77353	2.04717	2.45462	3.06684	4.73241
0	0.0362057	0.0653358	0.0922085	0.121496	0.149832	0.185581	0.207812	0.241507	0.282354	0.310156	0.361604	0.415625	0.47996	0.560913	0.657907	0.761443	0.884493	1.11632	1.45047	1.7756	2.04839	2.45827	3.06951	4.7609
0	0.0363067	0.0654914	0.0924093	0.12175	0.14992	0.186007	0.207812	0.242292	0.283175	0.310156	0.361769	0.415625	0.48	0.561037	0.657909	0.761622	0.885161	1.11729	1.45291	1.77602	2.04989	2.45955	3.07451	4.7889
0	0.0363679	0.0655332	0.092674	0.122145	0.150046	0.186428	0.207812	0.24241	0.283182	0.310156	0.362055	0.415872	0.480388	0.561185	0.658152	0.761855	0.885196	1.11801	1.45376	1.77802	2.05049	2.47052	3.08217	4.79649
0	0.0364504	0.0659006	0.0926865	0.122723	0.150094	0.186813	0.207812	0.242443	0.283264	0.310156	0.362304	0.416021	0.480874	0.562111	0.660371	0.761936	0.886168	1.11845	1.45833	1.78032	2.05114	2.47176	3.08405	4.80493
0	0.036585	0.065944	0.0927082	0.122724	0.150539	0.187276	0.207812	0.242622	0.283275	0.311302	0.362575	0.418658	0.480982	0.56277	0.660917	0.764092	0.889833	1.11869	1.45896	1.78406	2.05186	2.4748	3.0851	4.8093
0	0.0367471	0.0659546	0.0927657	0.122869	0.150735	0.187298	0.207812	0.242764	0.283596	0.311514	0.36293	0.419185	0.481348	0.562992	0.661389	0.76454	0.892454	1.1191	1.46223	1.78471	2.05191	2.48047	3.08513	4.82801
0	0.0368385	0.0661325	0.092799	0.122944	0.150867	0.187431	0.207812	0.242899	0.283598	0.31179	0.362981	0.419226	0.4816	0.563747	0.662104	0.764896	0.893471	1.1191	1.46286	1.78544	2.05381	2.48047	3.09414	4.82979
0	0.0368686	0.0664185	0.093275	0.123103	0.150873	0.187467	0.207812	0.243049	0.283763	0.312238	0.363321	0.419602	0.481869	0.56426	0.662644	0.765038	0.894294	1.12058	1.46405	1.78869	2.06148	2.48047	3.09935	4.85649
0	0.0368784	0.0665197	0.0932763	0.123154	0.151058	0.187791	0.207812	0.243783	0.284411	0.312423	0.363436	0.41963	0.482179	0.564472	0.662966	0.765045	0.894517	1.12077	1.46499	1.78869	2.06376	2.48047	3.1075	4.85654
0	0.0369642	0.0666734	0.0932847	0.123397	0.151326	0.187921	0.207812	0.244192	0.285276	0.312592	0.36384	0.420316	0.482501	0.564836	0.664007	0.766035	0.895776	1.12161	1.46718	1.79185	2.06516	2.48047	3.13283	4.87082
0	0.0370357	0.0667606	0.09333	0.12346	0.151481	0.187965	0.207812	0.246346	0.285522	0.313754	0.363949	0.422152	0.482615	0.564842	0.664028	0.767171	0.899227	1.12472	1.46946	1.79304	2.06872	2.48047	3.13593	4.87335
0	0.0373508	0.0669276	0.0935992	0.123731	0.151526	0.188026	0.207812	0.246631	0.286089	0.314073	0.364187	0.422177	0.482646	0.565022	0.665784	0.767463	0.899386	1.12529	1.46946	1.79468	2.07115	2.48047	3.14373	4.87597
0	0.0373511	0.0669787	0.093678	0.124039	0.151596	0.188578	0.207812	0.246855	0.28615	0.314605	0.36437	0.422637	0.482649	0.56572	0.665824	0.768529	0.89968	1.12575	1.47256	1.7954	2.07742	2.48552	3.15496	4.87779
0	0.0373597	0.0670132	0.0937975	0.124044	0.151703	0.188681	0.207812	0.247453	0.286158	0.315494	0.365274	0.422818	0.482653	0.56579	0.667873	0.769419	0.90102	1.12612	1.47324	1.79715	2.07822	2.49066	3.15926	4.8778
0	0.0375115	0.067021	0.0938132	0.124206	0.151752	0.188733	0.207812	0.247799	0.28625	0.315676	0.366004	0.423102	0.482694	0.565942	0.669526	0.769502	0.9027	1.1277	1.47404	1.79964	2.07887	2.49224	3.16038	4.87985
0	0.0375556	0.0670827	0.0939713	0.12426	0.152119	0.189115	0.207812	0.247831	0.286382	0.315849	0.3665	0.42328	0.482964	0.566524	0.669682	0.770452	0.90318	1.12775	1.47463	1.80228	2.083	2.49284	3.16246	4.8825
0	0.037661	0.0672876	0.0939844	0.124327	0.152287	0.189162	0.207812	0.248008	0.286883	0.316295	0.366829	0.423459	0.482978	0.567326	0.670093	0.771267	0.903819	1.12776	1.47564	1.80274	2.09267	2.49514	3.19389	4.89953
0	0.0378107	0.067298	0.0940831	0.124424	0.152398	0.189228	0.207812	0.248047	0.286965	0.316377	0.366829	0.423841	0.48304	0.568055	0.671051	0.773466	0.904082	1.12846	1.48461	1.80349	2.09938	2.49974	3.20098	4.92321
0	0.0380348	0.0673739	0.0942469	0.124599	0.152481	0.189228	0.207812	0.248047	0.287314	0.316491	0.367055	0.424339	0.483651	0.568122	0.671483	0.773639	0.909009	1.1308	1.48569	1.80523	2.10051	2.49996	3.21425	4.96094
0	0.0382551	0.0673867	0.0942546	0.124668	0.152518	0.18934	0.207812	0.248047	0.287332	0.317618	0.367438	0.424621	0.483915	0.568176	0.671708	0.773874	0.909227	1.13169	1.48828	1.8079	2.10087	2.50244	3.21435	5.04239
0	0.038342	0.0673894	0.0942847	0.124753	0.152578	0.189486	0.207812	0.248047	0.2874	0.317961	0.367654	0.426216	0.484736	0.568224	0.671858	0.774153	0.910703	1.13204	1.48871	1.81196	2.10126	2.50803	3.21927	5.05918
0	0.0385699	0.0674046	0.0943641	0.124769	0.152692	0.189679	0.207813	0.248047	0.287483	0.318768	0.368083	0.426343	0.485761	0.569783	0.672878	0.774462	0.911047	1.13241	1.48946	1.81216	2.10222	2.51092	3.22433	5.15348
0	0.0385863	0.0674107	0.0945563	0.12503	0.152807	0.189771	0.207813	0.248047	0.287684	0.31889	0.368269	0.426535	0.48587	0.57044	0.672986	0.77468	0.911492	1.13469	1.4921	1.81256	2.10446	2.52446	3.2297	5.17909
0	0.0385934	0.0674775	0.0945698	0.125055	0.152912	0.189848	0.207813	0.248047	0.287757	0.319267	0.369079	0.426543	0.486014	0.570456	0.673619	0.774928	0.912818	1.13516	1.49233	1.8148	2.11479	2.52539	3.24359	5.35216
0	0.0388199	0.0678838	0.0946675	0.125059	0.15295	0.189893	0.207878	0.248047	0.289096	0.319468	0.370125	0.427732	0.48649	0.570499	0.674122	0.775626	0.912851	1.13902	1.49252	1.82156	2.12183	2.52589	3.25898	5.3546
0	0.0388727	0.067952	0.0946799	0.1254	0.153331	0.189905	0.208211	0.248047	0.289262	0.319536	0.370397	0.427986	0.486643	0.571018	0.674264	0.775724	0.915107	1.14773	1.49866	1.82217	2.12666	2.52959	3.26255	5.3546
0	0.038946	0.067971	0.0947771	0.125494	0.153349	0.189963	0.208767	0.248047	0.289408	0.319856	0.371403	0.42801	0.486919	0.571859	0.674404	0.777456	0.915657	1.14824	1.4988	1.82385	2.12988	2.53462	3.26273	5.47841
0	0.0390502	0.0680465	0.0949046	0.125655	0.15341	0.189988	0.209079	0.248047	0.289865	0.320419	0.371875	0.428016	0.487616	0.571992	0.674469	0.778326	0.91837	1.14908	1.50246	1.82621	2.13084	2.542	3.26522	5.51408
0	0.0393744	0.0688366	0.0950143	0.125925	0.153482	0.190083	0.209485	0.248047	0.290139	0.320543	0.372657	0.428156	0.48798	0.572396	0.674808	0.778799	0.919684	1.15179	1.50288	1.83799	2.13378	2.54554	3.27849	5.54206
0	0.0397052	0.0690377	0.0951267	0.125959	0.153863	0.190372	0.20993	0.248047	0.290165	0.32107	0.37293	0.42819	0.488117	0.573562	0.675021	0.779036	0.922	1.15263	1.50629	1.83916	2.13378	2.54689	3.28446	5.5465
0	0.0401087	0.0692887	0.0953087	0.125973	0.154227	0.190784	0.210141	0.248047	0.290291	0.321544	0.372965	0.428241	0.489063	0.574381	0.675126	0.779401	0.923687	1.15359	1.51042	1.8394	2.13854	2.54886	3.28564	5.55761
0	0.0404334	0.0693242	0.0954314	0.126152	0.154285	0.190805	0.21036	0.248047	0.290327	0.32167	0.374188	0.429817	0.489598	0.575866	0.675343	0.78018	0.925263	1.15504	1.51091	1.83951	2.1408	2.55013	3.29257	5.57318
0	0.0407116	0.0694615	0.0957288	0.126247	0.15442	0.19092	0.210851	0.248047	0.291246	0.321683	0.37541	0.429852	0.489616	0.5764	0.676152	0.780728	0.926217	1.15631	1.51135	1.84106	2.14674	2.55193	3.29938	5.59619
0	0.040958	0.0695803	0.0961169	0.126647	0.154742	0.19101	0.211049	0.248047	0.291435	0.322183	0.377853	0.430589	0.491203	0.577086	0.67638	0.780773	0.92876	1.15644	1.51156	1.84235	2.14896	2.56526	3.30741	5.59619
0	0.041176	0.0697858	0.0962832	0.126694	0.154838	0.19196	0.21135	0.248047	0.291765	0.322543	0.378093	0.431195	0.492373	0.57908	0.677293	0.782925	0.929366	1.15718	1.51374	1.8452	2.15089	2.56657	3.30877	5.61465
0	0.0412478	0.0700549	0.0963314	0.126702	0.154958	0.191979	0.211395	0.248047	0.291814	0.323228	0.378128	0.431234	0.494925	0.579081	0.677764	0.783589	0.929366	1.15756	1.51422	1.84528	2.15459	2.57002	3.30949	5.62055
0	0.041473	0.0701339	0.0964429	0.127067	0.155148	0.192309	0.211417	0.248047	0.292174	0.323543	0.378762	0.431551	0.495384	0.579407	0.677996	0.784393	0.929366	1.15837	1.51447	1.84679	2.17423	2.57781	3.32554	5.62828
0	0.0417618	0.0701759	0.0966239	0.127235	0.156016	0.192774	0.211839	0.248047	0.292658	0.323951	0.379351	0.431858	0.495983	0.580486	0.678049	0.784393	0.929402	1.15932	1.51686	1.84882	2.17556	2.57955	3.34962	5.6425
0	0.0417725	0.0701918	0.0966811	0.127466	0.156146	0.192786	0.211856	0.248047	0.293165	0.324213	0.379388	0.432386	0.496094	0.580797	0.678173	0.784781	0.929402	1.15966	1.51949	1.85111	2.17824	2.58703	3.35305	5.67057
0	0.041987	0.0701977	0.0968058	0.127806	0.15627	0.192827	0.212498	0.248047	0.293234	0.324484	0.379733	0.432581	0.496094	0.581123	0.678897	0.786008	0.929718	1.16165	1.51964	1.85245	2.17925	2.58969	3.35418	5.70379
0	0.0420044	0.0706409	0.0968944	0.127818	0.157151	0.192877	0.212625	0.248047	0.293891	0.325385	0.380178	0.432826	0.496094	0.581853	0.679323	0.786382	0.930228	1.16172	1.52217	1.85477	2.18261	2.60497	3.39036	5.71779
0	0.0422195	0.0707919	0.0969925	0.127991	0.157202	0.193117	0.212641	0.248047	0.293891	0.325741	0.38028	0.432971	0.496094	0.582032	0.680078	0.786685	0.930469	1.16227	1.52367	1.85547	2.18785	2.60818	3.39649	5.72552
0	0.0422265	0.0708233	0.0971995	0.128046	0.157364	0.193129	0.212975	0.248047	0.293891	0.326311	0.38096	0.433551	0.496094	0.582071	0.680389	0.787925	0.930469	1.16395	1.52398	1.8577	2.19029	2.61051	3.40364	5.74604
0	0.0423736	0.0708864	0.0973717	0.128096	0.157378	0.193485	0.213024	0.248047	0.293891	0.326407	0.381424	0.433889	0.496094	0.582575	0.680496	0.788104	0.930469	1.16494	1.52461	1.86008	2.1914	2.61191	3.41054	5.80871
0	0.0424771	0.0709602	0.0973878	0.129019	0.157405	0.193544	0.213426	0.248047	0.293891	0.326499	0.381688	0.434371	0.496094	0.583147	0.681861	0.788727	0.930469	1.16561	1.52465	1.8606	2.19646	2.61349	3.41154	5.83613
0	0.0424771	0.0709822	0.0973983	0.129061	0.157552	0.193686	0.213538	0.248163	0.293891	0.326604	0.381828	0.434462	0.496094	0.583457	0.681893	0.788817	0.930469	1.16602	1.52491	1.86074	2.20328	2.62247	3.41226	5.83833
0	0.0426123	0.0711061	0.0974711	0.129153	0.157719	0.193721	0.213663	0.248258	0.293891	0.327203	0.381863	0.434707	0.496094	0.584443	0.682164	0.789063	0.930469	1.16858	1.52611	1.86286	2.20751	2.6245	3.4165	5.83833
0	0.0431033	0.0711672	0.0976083	0.129212	0.15802	0.194134	0.213959	0.248815	0.293891	0.327317	0.382284	0.435271	0.496094	0.584857	0.682177	0.791535	0.930469	1.17237	1.5264	1.86298	2.21372	2.63153	3.42083	5.84415
0	0.0432454	0.0712005	0.0976555	0.129236	0.15854	0.194272	0.214098	0.248934	0.293891	0.32778	0.382703	0.435481	0.496094	0.584941	0.683228	0.794867	0.930469	1.17258	1.52653	1.86819	2.21571	2.6322	3.45108	5.94545
0	0.043479	0.0715885	0.0976799	0.129529	0.158582	0.19443	0.214303	0.248959	0.293891	0.328677	0.382996	0.435636	0.496094	0.585419	0.683448	0.795477	0.930469	1.17305	1.52906	1.87086	2.21822	2.63642	3.49411	5.99014
0	0.0436212	0.0717217	0.0979369	0.129532	0.158623	0.19481	0.214358	0.249414	0.293891	0.330018	0.383163	0.436159	0.496528	0.586138	0.683493	0.796991	0.933202	1.17638	1.53348	1.87132	2.21929	2.63949	3.50791	6.03842
0	0.0437161	0.0717526	0.0980233	0.129727	0.158638	0.195074	0.215292	0.249457	0.293891	0.330983	0.383214	0.436663	0.497181	0.586188	0.683634	0.79743	0.933818	1.17966	1.53499	1.87211	2.22315	2.64744	3.51395	6.08094
0	0.0437304	0.0719346	0.0980844	0.130002	0.158663	0.195088	0.215954	0.249615	0.293891	0.331007	0.383449	0.436915	0.497408	0.586384	0.684458	0.798159	0.934374	1.17992	1.53687	1.87477	2.23059	2.65178	3.53797	6.08094
0	0.0437761	0.0719699	0.0982067	0.130039	0.158854	0.195148	0.216249	0.249898	0.293891	0.331144	0.383786	0.437022	0.497587	0.587783	0.685208	0.798696	0.93537	1.18481	1.53813	1.88125	2.23242	2.65888	3.53823	6.08094
0	0.0438008	0.0719772	0.0985084	0.130163	0.158854	0.19522	0.216338	0.250111	0.293891	0.331236	0.383824	0.43752	0.497725	0.588214	0.685817	0.79879	0.937411	1.18505	1.5384	1.88328	2.23242	2.66265	3.53823	6.12871
0	0.0439703	0.0719945	0.0986361	0.130164	0.158928	0.195314	0.21636	0.250918	0.293891	0.331281	0.383833	0.437602	0.497993	0.589019	0.685875	0.800417	0.937787	1.18562	1.54686	1.88454	2.23242	2.67155	3.56242	6.13582
0	0.0440304	0.0721175	0.0995197	0.130178	0.159048	0.19547	0.216633	0.251771	0.293891	0.331421	0.383881	0.437785	0.498111	0.590335	0.686177	0.801363	0.939325	1.18785	1.54983	1.8871	2.23242	2.67197	3.56291	6.15645
0	0.0440562	0.0722492	0.0995476	0.130402	0.159543	0.195606	0.217063	0.252741	0.294418	0.331904	0.384274	0.438313	0.498389	0.590437	0.686546	0.802163	0.940099	1.18786	1.55078	1.88771	2.23624	2.68064	3.58634	6.16291
0	0.0441112	0.0723434	0.0996063	0.13041	0.15956	0.196124	0.21719	0.253008	0.295008	0.332151	0.386337	0.438499	0.498727	0.590559	0.686649	0.80375	0.940597	1.18887	1.55078	1.88858	2.23639	2.68498	3.58725	6.20444
0	0.0444352	0.0723485	0.0997994	0.130977	0.15966	0.196398	0.217497	0.253441	0.295063	0.332219	0.387043	0.438627	0.499043	0.590988	0.687002	0.804698	0.942106	1.19262	1.55078	1.89903	2.238	2.68708	3.62142	6.21179
0	0.0444885	0.07258	0.0998541	0.131111	0.159761	0.19657	0.217643	0.253582	0.295274	0.332329	0.387356	0.438627	0.499311	0.591065	0.688646	0.805978	0.9425	1.19306	1.55078	1.90215	2.23823	2.69477	3.62584	6.28005
0	0.0445398	0.0727025	0.0999027	0.131355	0.160683	0.196904	0.217658	0.253645	0.295478	0.332689	0.388185	0.438627	0.499434	0.591257	0.69353	0.806394	0.943523	1.19571	1.55757	1.90417	2.24777	2.695	3.62728	6.31804
0	0.0447392	0.0727498	0.100049	0.131685	0.160738	0.197017	0.217664	0.253669	0.295555	0.332785	0.388348	0.438627	0.500959	0.591484	0.69353	0.806458	0.943775	1.19633	1.56234	1.90432	2.25433	2.69783	3.65562	6.32554
0	0.0448602	0.0728949	0.10022	0.132089	0.16116	0.197069	0.217791	0.254058	0.295668	0.333477	0.388452	0.438759	0.50099	0.59262	0.69353	0.807861	0.944616	1.19685	1.56409	1.90633	2.25433	2.69929	3.67004	6.34431
0	0.0448841	0.0729722	0.100275	0.132635	0.161523	0.197402	0.218752	0.254165	0.295816	0.333501	0.388784	0.438829	0.501485	0.592856	0.69353	0.808187	0.945863	1.19842	1.56446	1.91258	2.25433	2.70047	3.67556	6.36899
0	0.0448881	0.0731105	0.100311	0.133143	0.162102	0.197972	0.219147	0.25451	0.295959	0.333951	0.388981	0.438921	0.50153	0.593331	0.69353	0.80916	0.947062	1.19922	1.56605	1.91316	2.25497	2.70397	3.68338	6.4685
0	0.044948	0.0731138	0.100319	0.133178	0.162543	0.198076	0.219918	0.255197	0.296406	0.333975	0.389894	0.439111	0.501619	0.594156	0.69364	0.810036	0.948334	1.20038	1.56634	1.91345	2.25959	2.70816	3.68748	6.51193
0	0.0452074	0.0733408	0.100428	0.133329	0.162562	0.198222	0.22008	0.255481	0.296578	0.334284	0.389913	0.43917	0.502177	0.594261	0.693667	0.81125	0.950418	1.20238	1.57147	1.91892	2.26431	2.71305	3.70786	6.63059
0	0.045311	0.0734809	0.100718	0.133493	0.162608	0.198623	0.220207	0.255542	0.296684	0.334313	0.390765	0.442131	0.502989	0.594471	0.694904	0.811347	0.950653	1.20272	1.57149	1.92008	2.26484	2.71363	3.72983	6.63519
0	0.0454353	0.0735785	0.100731	0.13353	0.162997	0.198659	0.220505	0.255922	0.296712	0.334314	0.391367	0.442232	0.503019	0.594704	0.695325	0.811372	0.950774	1.20458	1.57193	1.92263	2.26977	2.71421	3.73867	6.64429
0	0.0456042	0.0737693	0.100851	0.133772	0.163052	0.198737	0.22065	0.256521	0.296849	0.334467	0.392244	0.442278	0.503173	0.595305	0.695655	0.812641	0.952516	1.2049	1.57225	1.92308	2.27033	2.71488	3.74473	6.65542
0	0.0456214	0.0739428	0.101181	0.133788	0.163144	0.198788	0.221358	0.256729	0.296965	0.3354	0.392809	0.443014	0.50455	0.595534	0.696013	0.812895	0.954812	1.20803	1.57262	1.92497	2.27674	2.71621	3.7461	6.66223
0	0.0456435	0.0739647	0.101231	0.133822	0.16325	0.19882	0.221486	0.256846	0.297108	0.335703	0.392924	0.443129	0.50471	0.595611	0.6966	0.814013	0.956324	1.20929	1.57521	1.92679	2.28024	2.72316	3.753	6.68238
0	0.0456916	0.0743339	0.10131	0.133922	0.163354	0.199003	0.221771	0.256861	0.297186	0.335848	0.393195	0.444765	0.505896	0.596174	0.697815	0.814295	0.956933	1.21156	1.57715	1.92784	2.2855	2.73361	3.75363	6.69623
0	0.0458887	0.0744411	0.101393	0.134251	0.163563	0.199559	0.22224	0.256911	0.297276	0.33587	0.393395	0.444862	0.505949	0.597073	0.698064	0.814311	0.956969	1.21174	1.57842	1.92857	2.29119	2.73368	3.75363	6.72815
0	0.0459038	0.0745117	0.101683	0.134456	0.163575	0.199659	0.222289	0.257124	0.297574	0.335929	0.393917	0.444996	0.506105	0.597383	0.698241	0.815504	0.957503	1.21174	1.57913	1.93043	2.29637	2.73379	3.77196	6.73817
0	0.0459941	0.0746164	0.102139	0.134503	0.163634	0.199707	0.222289	0.257182	0.297912	0.336626	0.394075	0.446087	0.50619	0.59964	0.698749	0.815788	0.957531	1.21174	1.57937	1.93049	2.2964	2.73817	3.772	6.74384
0	0.0462715	0.0746573	0.102175	0.134738	0.163676	0.200022	0.222745	0.257682	0.298077	0.336865	0.394615	0.446609	0.506492	0.599921	0.701175	0.81581	0.958006	1.21346	1.5807	1.93216	2.29694	2.73825	3.79132	6.81113
0	0.0462843	0.0746588	0.102213	0.134827	0.163968	0.200179	0.222786	0.257732	0.298147	0.33718	0.394742	0.447206	0.506963	0.600455	0.701278	0.816089	0.960311	1.21454	1.58076	1.93371	2.29776	2.7446	3.79155	6.88328
0	0.0463166	0.0746792	0.102312	0.134946	0.164207	0.200277	0.223039	0.258096	0.298184	0.33758	0.395164	0.447722	0.507826	0.601029	0.701393	0.816179	0.963801	1.21545	1.58158	1.94005	2.29892	2.7461	3.79439	6.91081
0	0.0463166	0.074747	0.102327	0.135078	0.164732	0.200452	0.223624	0.259366	0.298347	0.337679	0.395285	0.448283	0.507858	0.601719	0.701583	0.816397	0.964791	1.21645	1.58644	1.94196	2.30398	2.74615	3.79439	7.05518
0	0.0463207	0.0748005	0.102414	0.135102	0.164835	0.200909	0.223991	0.259464	0.298361	0.337687	0.395355	0.448756	0.507994	0.601966	0.701652	0.817098	0.9653	1.21763	1.58827	1.94441	2.30436	2.75537	3.85072	7.07899
0	0.0463942	0.0748337	0.102824	0.13512	0.165022	0.201149	0.224427	0.260263	0.298528	0.337834	0.395367	0.448778	0.508049	0.601984	0.701901	0.817427	0.970231	1.21845	1.58827	1.94465	2.30632	2.75964	3.85072	7.12851
0	0.0464735	0.0748403	0.102866	0.135248	0.165057	0.201177	0.224448	0.2603	0.298634	0.338042	0.395745	0.448864	0.508178	0.602137	0.703499	0.819596	0.970315	1.2204	1.59156	1.94694	2.31035	2.76618	3.85345	7.16181
0	0.0466185	0.0749337	0.102961	0.135287	0.165547	0.201334	0.224534	0.260808	0.298706	0.338613	0.396334	0.449174	0.508416	0.604143	0.705286	0.820162	0.971178	1.22165	1.59479	1.95142	2.31036	2.76833	3.87505	7.29949
0	0.0466714	0.0750198	0.10309	0.135449	0.165901	0.201451	0.224625	0.260962	0.299262	0.338614	0.396675	0.449879	0.508633	0.60418	0.705502	0.820372	0.972526	1.22198	1.59565	1.95504	2.31147	2.77077	3.87589	7.45711
0	0.046733	0.0752341	0.103185	0.135551	0.165978	0.201659	0.225055	0.261053	0.299463	0.339128	0.39679	0.449915	0.508755	0.604721	0.706978	0.821142	0.973579	1.22297	1.59585	1.96266	2.32005	2.77162	3.87748	7.54405
0	0.0469125	0.0752514	0.103266	0.135935	0.166716	0.201787	0.225844	0.261395	0.301269	0.339273	0.396823	0.450459	0.509042	0.606942	0.707736	0.821643	0.975565	1.22741	1.59807	1.96352	2.32017	2.77325	3.88516	7.54405
0	0.0472503	0.0754239	0.103776	0.136462	0.167254	0.20193	0.22585	0.261925	0.301656	0.339473	0.397464	0.452235	0.50931	0.606961	0.709221	0.82238	0.975796	1.22905	1.60004	1.96744	2.32488	2.78376	3.88614	7.62421
0	0.0472796	0.0755091	0.103936	0.136601	0.167309	0.202399	0.2266	0.262478	0.301746	0.340012	0.397705	0.452454	0.509916	0.608847	0.709372	0.823656	0.977514	1.22979	1.60114	1.96865	2.32789	2.81125	3.88696	7.66312
0	0.0472938	0.0755918	0.104064	0.136711	0.168161	0.202523	0.226616	0.262751	0.301937	0.340151	0.398125	0.452481	0.510284	0.610327	0.710541	0.823772	0.978897	1.23076	1.60317	1.97134	2.33002	2.81553	3.9166	7.7825
0	0.047392	0.0757093	0.104095	0.136724	0.168233	0.202798	0.22666	0.26325	0.302313	0.340429	0.398231	0.452624	0.510915	0.610651	0.711461	0.824013	0.978903	1.23181	1.60987	1.97284	2.333	2.82481	3.91813	7.78627
0	0.0476581	0.0759044	0.104102	0.136939	0.168262	0.203174	0.226805	0.263516	0.303071	0.340803	0.398346	0.452825	0.512857	0.611464	0.712242	0.824373	0.979132	1.23262	1.61019	1.97302	2.33361	2.82902	3.92197	7.83202
0	0.0479063	0.0760265	0.104262	0.137116	0.168557	0.2032	0.22684	0.263548	0.303249	0.340834	0.398511	0.452937	0.513297	0.612357	0.712461	0.825009	0.982567	1.2351	1.61195	1.9735	2.33692	2.83426	3.92197	8.08671
0	0.0479195	0.0760591	0.104281	0.137186	0.168744	0.203753	0.227064	0.263622	0.303273	0.34095	0.39864	0.453309	0.513789	0.612868	0.712605	0.825443	0.984132	1.23989	1.61332	1.97545	2.33961	2.83575	3.92197	8.16733
0	0.0479984	0.0765643	0.104304	0.137212	0.169064	0.203954	0.227311	0.263977	0.30331	0.341665	0.398993	0.453353	0.513804	0.61301	0.713392	0.825973	0.984426	1.24015	1.61335	1.97813	2.34007	2.8403	3.92197	8.19305
0	0.0482453	0.0765938	0.104358	0.137218	0.169271	0.204023	0.227344	0.265336	0.303432	0.341686	0.399289	0.454297	0.513925	0.615454	0.713644	0.826129	0.98454	1.24023	1.61674	1.98039	2.34084	2.84122	3.9394	8.37143
0	0.0482556	0.0766847	0.104388	0.137366	0.169378	0.204061	0.227909	0.265904	0.303606	0.342128	0.399844	0.454413	0.514077	0.615693	0.713838	0.827013	0.985583	1.24023	1.61799	1.98109	2.34403	2.8462	3.94437	8.42478
0	0.0483154	0.0766947	0.10453	0.137379	0.169398	0.204264	0.22802	0.266698	0.303898	0.342249	0.400526	0.454704	0.515278	0.615967	0.714287	0.827198	0.990573	1.24023	1.61967	1.98134	2.34575	2.84793	3.97649	8.45135
0	0.0483189	0.0767257	0.104694	0.137897	0.169556	0.204363	0.228715	0.266912	0.30417	0.343065	0.400747	0.456038	0.515335	0.616129	0.715462	0.827507	0.990678	1.24023	1.6203	1.98403	2.34577	2.84919	3.9902	8.47268
0	0.0483655	0.076749	0.104858	0.137923	0.169869	0.204806	0.228805	0.267059	0.304215	0.343409	0.401036	0.456441	0.516528	0.616487	0.716271	0.82992	0.992024	1.24023	1.62134	1.98438	2.35773	2.85311	3.99964	8.52899
0	0.0484424	0.0768829	0.105251	0.13794	0.169883	0.205606	0.229054	0.26729	0.304372	0.34351	0.401388	0.456443	0.51808	0.617099	0.716977	0.830183	0.992188	1.24023	1.62259	1.98438	2.35919	2.87138	4.0185	8.60224
0	0.0486176	0.0769222	0.105562	0.138006	0.170032	0.205716	0.229081	0.267562	0.304561	0.344062	0.402618	0.456704	0.518813	0.617542	0.717247	0.830484	0.992188	1.24023	1.62347	1.98438	2.3647	2.88429	4.02272	8.61484
0	0.0488608	0.0769558	0.105638	0.138118	0.170295	0.20618	0.229225	0.267595	0.304811	0.344367	0.403439	0.456944	0.519481	0.617843	0.71773	0.830761	0.992188	1.24023	1.62407	1.98438	2.36732	2.88995	4.04282	8.65864
0	0.0489428	0.0773639	0.106008	0.138221	0.170342	0.206239	0.229317	0.267661	0.305273	0.344689	0.404429	0.457903	0.519637	0.619906	0.71778	0.830962	0.992188	1.24023	1.62792	1.98438	2.37303	2.89272	4.0537	8.67774
0	0.0491289	0.0773915	0.106057	0.138339	0.170477	0.206511	0.229449	0.267798	0.305647	0.344916	0.404618	0.458236	0.51971	0.620312	0.718049	0.83125	0.992188	1.24023	1.62814	1.98438	2.38234	2.8932	4.0625	8.69454
0	0.0491521	0.0774452	0.106116	0.138357	0.170561	0.206693	0.229517	0.268135	0.306541	0.344986	0.405074	0.459138	0.519827	0.620312	0.718316	0.83125	0.992436	1.24023	1.63068	1.98689	2.38837	2.89489	4.09016	8.77141
0	0.0492438	0.0777413	0.106116	0.138567	0.170603	0.2068	0.229522	0.268166	0.307354	0.344992	0.405118	0.459808	0.519906	0.620312	0.718678	0.83125	0.99363	1.24023	1.63293	1.98846	2.38857	2.91648	4.12891	8.79431
0	0.0492548	0.0777661	0.106225	0.13884	0.171103	0.207116	0.230047	0.268487	0.308004	0.345158	0.405415	0.459854	0.52349	0.620312	0.718695	0.83125	0.993779	1.24062	1.63351	1.99982	2.39201	2.92666	4.14106	8.80688
0	0.0493437	0.0777844	0.106556	0.139101	0.171239	0.207403	0.230149	0.268679	0.308464	0.345638	0.405449	0.460231	0.523835	0.620312	0.719404	0.83125	0.99385	1.24062	1.63496	1.99982	2.39365	2.9389	4.15714	8.85279
0	0.0494642	0.0778058	0.106589	0.13914	0.171475	0.207589	0.230569	0.268804	0.308685	0.345778	0.405597	0.460839	0.524074	0.620312	0.719675	0.83125	0.994995	1.24063	1.63614	2.0038	2.40181	2.93891	4.15802	9.07043
0	0.0496442	0.0779484	0.106703	0.139263	0.171822	0.207615	0.230725	0.26908	0.309197	0.34578	0.406031	0.460921	0.524356	0.620312	0.720212	0.83125	0.995959	1.24063	1.63757	2.00479	2.40503	2.94708	4.17722	9.11266
0	0.0499832	0.0781793	0.106808	0.139396	0.17204	0.20781	0.231109	0.269897	0.309231	0.347266	0.406143	0.461026	0.524628	0.620312	0.721096	0.831532	0.998545	1.24063	1.63837	2.00591	2.40565	2.94752	4.17765	9.17466
0	0.0501213	0.0782674	0.106859	0.139478	0.172192	0.207812	0.231252	0.269985	0.310156	0.347876	0.406468	0.46192	0.525397	0.620313	0.722004	0.831706	0.99874	1.24221	1.64081	2.01621	2.40854	2.95514	4.19155	9.32759
0	0.0502202	0.0782785	0.106956	0.139615	0.172289	0.207812	0.231728	0.27012	0.310156	0.34815	0.406763	0.463261	0.526344	0.620313	0.722051	0.833043	1.00094	1.2436	1.6434	2.02196	2.40946	2.99135	4.1957	9.35114
0	0.0502405	0.0784653	0.106985	0.139703	0.172447	0.207812	0.23186	0.270215	0.310156	0.348297	0.407535	0.463566	0.527144	0.621182	0.722117	0.8337	1.00236	1.24442	1.64417	2.02217	2.41246	2.99785	4.21505	9.36712
0	0.0503212	0.0785475	0.107072	0.139722	0.172641	0.207812	0.232056	0.270236	0.310156	0.348461	0.407567	0.463952	0.527197	0.621586	0.724077	0.833713	1.00281	1.2447	1.64487	2.02423	2.43097	3.01621	4.22409	9.41944
0	0.0504057	0.0787902	0.107203	0.140144	0.172782	0.207812	0.232613	0.270358	0.310156	0.349597	0.407607	0.464683	0.527514	0.622173	0.72438	0.834357	1.00415	1.24518	1.64806	2.02447	2.43279	3.01663	4.24854	9.58218
0	0.0505897	0.0788219	0.107488	0.140536	0.172834	0.207812	0.232867	0.270778	0.310156	0.349842	0.407892	0.464683	0.527744	0.623089	0.725307	0.834425	1.00505	1.2458	1.64891	2.02769	2.43589	3.01762	4.25006	9.62887
0	0.0505958	0.0790158	0.107705	0.140587	0.172845	0.207812	0.233041	0.270969	0.310156	0.349862	0.407918	0.464683	0.527798	0.623437	0.725459	0.835188	1.00507	1.24775	1.64924	2.03884	2.43728	3.02311	4.2887	10.0402
0	0.0506631	0.0790614	0.107733	0.140689	0.17305	0.207812	0.233068	0.27101	0.310156	0.349869	0.408391	0.464683	0.529985	0.623437	0.726056	0.83558	1.00551	1.24868	1.65339	2.03991	2.44292	3.03352	4.29459	10.229
0	0.0506868	0.0791175	0.107834	0.140823	0.173253	0.207812	0.23342	0.271103	0.310156	0.350137	0.408536	0.464683	0.530732	0.623437	0.726144	0.835697	1.00571	1.24908	1.65477	2.04086	2.44298	3.03925	4.30587	10.302
0	0.0507149	0.0794096	0.107869	0.140928	0.17356	0.207812	0.233529	0.27189	0.310156	0.35035	0.409055	0.464683	0.531216	0.623437	0.726745	0.835807	1.00588	1.25047	1.65509	2.0418	2.44362	3.03928	4.33038	14.206
0	0.0507803	0.0794742	0.108019	0.141271	0.173689	0.207812	0.234091	0.2719	0.310156	0.350599	0.409101	0.464683	0.531566	0.623437	0.728037	0.837524	1.00695	1.25201	1.65579	2.05718	2.44394	3.04776	4.35303	14.6914
0	0.0507807	0.0794999	0.108047	0.141514	0.17475	0.207812	0.234742	0.272599	0.310156	0.350791	0.409511	0.464683	0.532252	0.623437	0.728078	0.838119	1.00809	1.25288	1.66162	2.05778	2.46195	3.05805	4.35898	15.2826
0	0.0509096	0.0795988	0.108068	0.141798	0.17484	0.207812	0.234818	0.272688	0.310156	0.350791	0.409687	0.464683	0.532665	0.623438	0.728712	0.838513	1.00849	1.2532	1.66329	2.06075	2.46652	3.06098	4.37624	20.8905
0	0.0509441	0.0797266	0.108183	0.141895	0.17503	0.207812	0.234969	0.27274	0.310156	0.351366	0.409708	0.464683	0.533294	0.623438	0.729695	0.838771	1.00884	1.25358	1.66395	2.08312	2.46709	3.062	4.38061	20.8905
0	0.0509518	0.0797671	0.108322	0.142462	0.175049	0.207812	0.235178	0.272761	0.310156	0.352003	0.410525	0.464683	0.535164	0.623438	0.730923	0.839204	1.00906	1.25507	1.66624	2.08322	2.47561	3.07196	4.3954	21.2018
0	0.0510466	0.079999	0.108416	0.142502	0.175305	0.207812	0.235326	0.27357	0.310156	0.352325	0.411002	0.464683	0.53581	0.623438	0.731505	0.839317	1.0118	1.25563	1.66993	2.08771	2.47724	3.0767	4.40262	21.2294
0	0.0511664	0.0802435	0.108673	0.142524	0.175454	0.207812	0.235543	0.273616	0.310156	0.352453	0.411144	0.464818	0.536538	0.623438	0.732299	0.839376	1.01264	1.25707	1.67519	2.09191	2.48047	3.08023	4.45846	21.2714
0	0.0512961	0.0803915	0.108681	0.142614	0.175472	0.207812	0.236276	0.273863	0.310156	0.352465	0.412776	0.465193	0.53672	0.623438	0.73286	0.840673	1.01292	1.25809	1.6773	2.0942	2.48047	3.08467	4.46484	21.3551
0	0.0514423	0.0804216	0.108699	0.142945	0.175479	0.207812	0.236432	0.27425	0.310156	0.353012	0.412891	0.465333	0.537908	0.623438	0.73369	0.841117	1.01305	1.25825	1.68139	2.09607	2.48047	3.08866	4.47173	21.4026
0	0.0514446	0.0804572	0.108736	0.142998	0.17548	0.207812	0.237329	0.274302	0.310156	0.35315	0.41324	0.465695	0.538714	0.623438	0.733964	0.841698	1.01349	1.25835	1.68232	2.09729	2.48047	3.09035	4.55012	21.4198
0	0.0515329	0.0804988	0.108872	0.143004	0.175697	0.207812	0.237404	0.274418	0.310156	0.353399	0.413247	0.466753	0.538857	0.623438	0.734809	0.842179	1.01427	1.2584	1.68585	2.09832	2.48047	3.09107	4.58476	21.6128
0	0.0515487	0.080541	0.108971	0.143097	0.175795	0.207812	0.237458	0.274891	0.310156	0.353437	0.413279	0.468423	0.538969	0.623438	0.735989	0.843832	1.01441	1.25964	1.68771	2.10029	2.48047	3.0985	4.58895	21.6384
0	0.0518882	0.0806047	0.109058	0.143196	0.175938	0.207812	0.237851	0.27536	0.310156	0.353446	0.4137	0.468439	0.539651	0.623806	0.736009	0.84472	1.01458	1.26182	1.69058	2.11752	2.48047	3.12307	4.59572	21.7448
0	0.0519366	0.0807508	0.109146	0.143196	0.176171	0.207812	0.238	0.275627	0.310156	0.353486	0.41467	0.468575	0.539683	0.627147	0.737042	0.845443	1.01589	1.26262	1.69201	2.11836	2.48153	3.12617	4.63156	21.7448
0	0.0519502	0.0807845	0.109746	0.14337	0.176199	0.207812	0.238751	0.27597	0.310156	0.35378	0.414957	0.469771	0.540082	0.627568	0.737046	0.845464	1.01658	1.2631	1.69272	2.11931	2.49027	3.1318	4.6339	21.7448
0	0.0519664	0.0808255	0.109974	0.143577	0.176726	0.207812	0.238906	0.276459	0.310156	0.353853	0.415139	0.470998	0.542156	0.627753	0.738454	0.845647	1.01674	1.26385	1.69505	2.1234	2.49284	3.14184	4.66624	21.7448
0	0.0520122	0.0808789	0.110108	0.143822	0.176878	0.207812	0.239356	0.276782	0.310156	0.354354	0.415418	0.471078	0.543316	0.62804	0.738533	0.845712	1.01759	1.26396	1.69762	2.12402	2.50164	3.14691	4.67758	22.0776
0	0.0520825	0.0809862	0.110147	0.144184	0.1771	0.207812	0.2394	0.277388	0.310156	0.354659	0.415625	0.47172	0.54519	0.629078	0.738833	0.846144	1.01814	1.2648	1.70631	2.1323	2.50433	3.15296	4.69121	22.186
0	0.0520952	0.0812433	0.110404	0.144213	0.177131	0.207812	0.23964	0.277614	0.310156	0.355382	0.415625	0.47188	0.545266	0.629107	0.739333	0.846597	1.01841	1.2648	1.70862	2.13278	2.51138	3.15312	4.71941
0	0.0521383	0.0812989	0.110435	0.144412	0.177653	0.207812	0.239827	0.278213	0.310156	0.355443	0.415625	0.472034	0.545282	0.629287	0.739934	0.847775	1.01901	1.2648	1.71031	2.13378	2.5126	3.15593	4.71976
0	0.05214	0.0813137	0.110493	0.144487	0.177712	0.207812	0.2401	0.27872	0.310156	0.355774	0.415625	0.472292	0.545853	0.629391	0.740193	0.848597	1.01922	1.2648	1.71045	2.13496	2.5205	3.15893	4.72134
0	0.0522081	0.0813867	0.110522	0.144633	0.177934	0.207812	0.240382	0.278855	0.310156	0.356967	0.415625	0.472536	0.546329	0.629578	0.740766	0.848706	1.01977	1.2648	1.71117	2.13544	2.52287	3.15986	4.72696
0	0.0522947	0.0814252	0.110893	0.144974	0.178132	0.207812	0.240674	0.279893	0.310156	0.356983	0.415625	0.472939	0.547495	0.629718	0.741127	0.849841	1.02272	1.26636	1.71306	2.13813	2.52959	3.16208	4.74768
0	0.0524959	0.0816453	0.111	0.144988	0.178476	0.207812	0.240687	0.280023	0.310156	0.357051	0.415625	0.474152	0.54783	0.63106	0.741376	0.850281	1.02306	1.26764	1.71465	2.14318	2.53302	3.18816	4.76914
0	0.0525716	0.0818146	0.111069	0.145217	0.1786	0.207812	0.24077	0.280124	0.310156	0.35707	0.415625	0.474459	0.548973	0.632143	0.74186	0.850292	1.02514	1.26901	1.71476	2.14337	2.53325	3.18911	4.77368
0	0.0528006	0.0818334	0.111147	0.145403	0.178713	0.207812	0.240937	0.280392	0.310156	0.357262	0.415625	0.474569	0.549581	0.632569	0.741875	0.851473	1.02651	1.2704	1.71531	2.14425	2.53574	3.20385	4.78129
0	0.0528875	0.0819631	0.111301	0.145805	0.178867	0.207812	0.241047	0.280816	0.310156	0.358062	0.415625	0.474911	0.549753	0.63342	0.743925	0.851565	1.02842	1.27041	1.7179	2.1573	2.53648	3.21435	4.78389
0	0.052907	0.0823928	0.111324	0.145816	0.178925	0.207812	0.24124	0.28082	0.310156	0.358377	0.415625	0.475058	0.549845	0.634143	0.744141	0.851583	1.02857	1.27127	1.71791	2.16655	2.53774	3.22461	4.78727
0	0.0530863	0.0825134	0.111345	0.145839	0.179056	0.207812	0.241289	0.281142	0.310156	0.359291	0.415625	0.475197	0.550063	0.634774	0.744141	0.852401	1.02869	1.27206	1.72111	2.17014	2.541	3.22914	4.82978
0	0.0531055	0.0825595	0.111448	0.145896	0.17925	0.207812	0.241616	0.281264	0.310156	0.35955	0.415625	0.475398	0.550839	0.634946	0.744141	0.852692	1.02904	1.27401	1.73037	2.17313	2.54354	3.23822	4.85649
0	0.0531466	0.0827195	0.111527	0.146175	0.179252	0.207812	0.242141	0.281344	0.310156	0.359689	0.415625	0.475903	0.552276	0.634962	0.744141	0.852692	1.02915	1.27665	1.73086	2.17677	2.54858	3.24063	4.87597
0	0.0532448	0.0828307	0.111665	0.146409	0.179421	0.207812	0.242348	0.281409	0.310156	0.360246	0.415625	0.476154	0.552277	0.635432	0.744141	0.852852	1.03045	1.27682	1.73106	2.1773	2.55987	3.24821	4.89128
0	0.0534261	0.0829034	0.111691	0.146409	0.179674	0.207812	0.24269	0.281478	0.310156	0.360776	0.415625	0.476512	0.552715	0.637337	0.744141	0.853333	1.03216	1.27822	1.73165	2.18133	2.56155	3.26161	4.90664
0	0.0534626	0.0829466	0.111705	0.146471	0.179784	0.207812	0.243326	0.28161	0.310156	0.361056	0.415625	0.477428	0.552765	0.637372	0.744141	0.855345	1.03304	1.27881	1.73367	2.18341	2.56428	3.26255	4.91797
0	0.0535507	0.0829921	0.111731	0.146545	0.180068	0.207812	0.243885	0.281693	0.310156	0.361077	0.415625	0.477445	0.552948	0.63757	0.744141	0.856171	1.03388	1.27881	1.73633	2.18694	2.56872	3.26522	4.95389
0	0.0536206	0.0830888	0.11184	0.14666	0.180072	0.207812	0.243913	0.282107	0.310156	0.361339	0.415625	0.477494	0.553772	0.638225	0.744141	0.856366	1.03587	1.27934	1.73634	2.18919	2.5712	3.27704	4.97375
0	0.0536894	0.0830954	0.11195	0.146684	0.180224	0.207812	0.244416	0.2823	0.310156	0.361391	0.415625	0.477634	0.554095	0.640481	0.744141	0.856833	1.03605	1.28246	1.73766	2.20707	2.57437	3.28721	4.97823
0	0.053693	0.0831849	0.112026	0.146935	0.180287	0.207812	0.244637	0.282302	0.310156	0.361454	0.415625	0.477974	0.55465	0.640985	0.744295	0.856833	1.0374	1.2842	1.74048	2.20948	2.5745	3.29142	4.98568
0	0.0537824	0.0832024	0.112208	0.147253	0.180394	0.207812	0.244699	0.282565	0.310156	0.362051	0.415625	0.479156	0.55465	0.641039	0.744646	0.858288	1.03804	1.28714	1.74099	2.21197	2.5789	3.29315	5.08571
0	0.0538396	0.0833187	0.112673	0.147624	0.180455	0.207812	0.245286	0.282583	0.310156	0.362846	0.415625	0.479251	0.555284	0.641523	0.745014	0.86039	1.03906	1.28852	1.74596	2.21231	2.57948	3.302	5.11362
0	0.0539024	0.0833943	0.112718	0.147985	0.18131	0.207812	0.245588	0.282644	0.310156	0.363248	0.415625	0.479938	0.556479	0.64195	0.745614	0.86076	1.03906	1.2892	1.75095	2.21316	2.58111	3.30457	5.11362
0	0.0539359	0.0834575	0.11294	0.148047	0.181395	0.207812	0.245663	0.282649	0.310156	0.36333	0.415625	0.480219	0.556485	0.642023	0.746279	0.860952	1.03906	1.29004	1.75131	2.2186	2.58136	3.31644	5.11362
0	0.0539797	0.0834942	0.113006	0.148047	0.181468	0.207812	0.24605	0.283069	0.310156	0.363384	0.415625	0.480465	0.557298	0.643181	0.746281	0.861451	1.03906	1.29326	1.75269	2.22359	2.5891	3.33025	5.19025
0	0.0541387	0.0834966	0.113045	0.148067	0.181676	0.207812	0.24624	0.283186	0.310156	0.363413	0.415625	0.481328	0.557345	0.643745	0.748373	0.864445	1.03906	1.29547	1.75332	2.22392	2.58969	3.33601	5.20757
0	0.0541416	0.0835546	0.113107	0.148254	0.18175	0.207812	0.246426	0.283359	0.310156	0.363689	0.415625	0.481623	0.55896	0.644075	0.749279	0.864728	1.03906	1.29627	1.7534	2.22653	2.5939	3.3371	5.2703
0	0.0541459	0.0836919	0.113154	0.148429	0.181863	0.207812	0.246506	0.283384	0.310156	0.363742	0.415625	0.482748	0.559979	0.644115	0.749279	0.865134	1.04062	1.29845	1.75396	2.22756	2.59417	3.33958	5.32465
0	0.054252	0.0837148	0.113184	0.148488	0.181937	0.207812	0.246633	0.283531	0.310156	0.364072	0.415625	0.483403	0.560767	0.64559	0.749279	0.86532	1.04499	1.30199	1.75396	2.22945	2.6005	3.34625	5.3546
0	0.054269	0.0837526	0.113307	0.149129	0.181996	0.207812	0.246919	0.283705	0.311074	0.364133	0.415625	0.484827	0.560815	0.645771	0.749279	0.865474	1.04511	1.30257	1.75396	2.23242	2.60842	3.35051	5.3546
0	0.054346	0.083798	0.113374	0.149189	0.182251	0.207812	0.247088	0.283755	0.312075	0.364766	0.416812	0.484875	0.561519	0.646722	0.749279	0.866424	1.04557	1.3049	1.75396	2.23242	2.61703	3.35163	5.3546
0	0.0543788	0.083798	0.113807	0.149387	0.182462	0.207812	0.247365	0.283972	0.312442	0.36481	0.416967	0.48578	0.561768	0.646961	0.749428	0.867377	1.04583	1.30509	1.75421	2.23242	2.61927	3.35764	5.3546
0	0.0543902	0.0839586	0.113838	0.149469	0.182521	0.207812	0.247783	0.284758	0.313323	0.365102	0.416976	0.486964	0.5631	0.647381	0.749509	0.867556	1.04606	1.30531	1.75812	2.23354	2.63101	3.36537	5.3546
0	0.0544015	0.0841381	0.113884	0.149544	0.183178	0.207812	0.247928	0.284962	0.313428	0.365177	0.417059	0.487059	0.564426	0.647754	0.749539	0.868687	1.04624	1.30585	1.75867	2.23694	2.63287	3.38922	5.39321
0	0.0545506	0.0841648	0.113952	0.149664	0.183676	0.207812	0.248047	0.285145	0.313564	0.365439	0.417451	0.488756	0.565003	0.647893	0.750458	0.868714	1.04626	1.30702	1.75909	2.23878	2.63406	3.41743	5.39868
0	0.0547208	0.0843194	0.114093	0.149735	0.183832	0.207812	0.248047	0.285525	0.313962	0.366027	0.417855	0.488797	0.565154	0.648304	0.751425	0.868894	1.04637	1.30837	1.76084	2.23906	2.64349	3.41941	5.49381
0	0.0548185	0.0843368	0.114242	0.149767	0.183869	0.207812	0.248047	0.285531	0.314187	0.366409	0.41832	0.489188	0.566048	0.648685	0.751787	0.868903	1.04682	1.30867	1.76119	2.24097	2.64377	3.42918	5.50495
0	0.0548297	0.0843514	0.114302	0.149792	0.183884	0.207812	0.248047	0.285562	0.314259	0.366662	0.418377	0.48934	0.566099	0.650771	0.751803	0.87026	1.04767	1.30964	1.76379	2.24211	2.65044	3.42959	5.50753
0	0.0549697	0.0844888	0.114431	0.149898	0.183968	0.207812	0.248047	0.285603	0.314268	0.366763	0.418535	0.491142	0.566125	0.651062	0.752875	0.871565	1.04862	1.31075	1.76397	2.24304	2.65231	3.43133	5.51447
0	0.0551687	0.0845539	0.114561	0.149912	0.184059	0.207812	0.248047	0.285671	0.314288	0.366923	0.419054	0.491311	0.566332	0.651745	0.752899	0.871888	1.05005	1.31111	1.76722	2.24351	2.65351	3.44693	5.51594
0	0.0552105	0.0845783	0.114622	0.150207	0.18418	0.207812	0.248047	0.286191	0.314558	0.368319	0.419951	0.491449	0.566588	0.651864	0.753069	0.871999	1.05093	1.31228	1.76725	2.24616	2.65701	3.45489	5.52014
0	0.0552133	0.084806	0.114648	0.150253	0.184201	0.207812	0.248047	0.28627	0.314695	0.368714	0.42083	0.492148	0.567043	0.65188	0.753264	0.872495	1.05116	1.31414	1.76805	2.24629	2.66503	3.45489	5.52951
0	0.0553574	0.084928	0.11471	0.150274	0.18431	0.207812	0.248047	0.28671	0.315202	0.368741	0.421298	0.492667	0.567402	0.652228	0.754814	0.874385	1.05292	1.31533	1.77035	2.24969	2.66607	3.46633	5.5636
0	0.0554078	0.0851978	0.11489	0.150294	0.184319	0.207812	0.248047	0.286919	0.316247	0.369003	0.421821	0.492888	0.568268	0.652268	0.755031	0.875096	1.05328	1.31534	1.77079	2.25146	2.67155	3.47131	5.57195
0	0.0554611	0.0852244	0.114945	0.150312	0.1845	0.207812	0.248047	0.287004	0.316248	0.36906	0.423386	0.492922	0.569155	0.653535	0.755235	0.875272	1.05341	1.31559	1.77551	2.25171	2.67155	3.48362	5.58166
0	0.0554777	0.0853405	0.114989	0.150512	0.18458	0.207812	0.248047	0.287176	0.316313	0.369413	0.423632	0.49306	0.570332	0.653578	0.755639	0.875911	1.05556	1.31565	1.77657	2.25433	2.67155	3.49574	5.58423
0	0.0556633	0.0853527	0.11515	0.150562	0.184582	0.207812	0.248047	0.287187	0.316602	0.369855	0.424187	0.493113	0.571663	0.654145	0.756423	0.87635	1.05583	1.31803	1.77941	2.25433	2.67466	3.50791	5.58436
0	0.0556875	0.0857135	0.115206	0.150642	0.184697	0.207812	0.248047	0.287227	0.316651	0.370051	0.424687	0.493244	0.571731	0.654248	0.756666	0.877203	1.05748	1.3189	1.78354	2.25433	2.68054	3.51395	5.59252
0	0.0559506	0.085893	0.115238	0.15067	0.184759	0.207812	0.248047	0.287697	0.316778	0.370594	0.424689	0.493681	0.572132	0.654794	0.757391	0.877894	1.0581	1.31971	1.78388	2.25589	2.68824	3.53823	5.59619
0	0.055961	0.0859267	0.115781	0.150744	0.184867	0.207812	0.248047	0.287703	0.317021	0.37073	0.424826	0.493836	0.572623	0.654978	0.757491	0.879922	1.05815	1.32136	1.78445	2.2591	2.68961	3.53823	5.59619
0	0.0561556	0.086198	0.115881	0.150817	0.184928	0.207812	0.248047	0.288224	0.317082	0.371065	0.425137	0.494051	0.572942	0.655153	0.757619	0.880177	1.05837	1.32172	1.78686	2.26075	2.69123	3.59051	5.59619
0	0.0563468	0.0862402	0.115995	0.151001	0.184949	0.207812	0.248047	0.288565	0.317168	0.37134	0.425498	0.494555	0.573245	0.656658	0.757772	0.881105	1.05898	1.32193	1.78869	2.26287	2.7132	3.59862	5.59619
0	0.0563729	0.0862826	0.116005	0.15155	0.185005	0.207812	0.248047	0.288631	0.317514	0.371529	0.425594	0.494998	0.573875	0.657161	0.75792	0.881674	1.05929	1.32416	1.795	2.26601	2.71418	3.59999	5.63677
0	0.0564265	0.0864506	0.116033	0.15191	0.185099	0.207812	0.248047	0.288946	0.317788	0.372195	0.425713	0.49551	0.573948	0.657161	0.758824	0.881674	1.05964	1.32736	1.79559	2.26853	2.7215	3.62023	5.65055
0	0.0566705	0.0868253	0.116078	0.151961	0.185368	0.207812	0.248047	0.28909	0.317869	0.372494	0.426454	0.495858	0.573979	0.657161	0.759141	0.881737	1.05964	1.32749	1.79887	2.27229	2.73177	3.62068	5.67432
0	0.0566771	0.086875	0.116141	0.152039	0.185389	0.207812	0.248047	0.289122	0.318003	0.372799	0.426478	0.496002	0.574203	0.657161	0.759308	0.882487	1.05984	1.32922	1.80199	2.27442	2.73824	3.63833	5.67538
0	0.0567204	0.086913	0.116266	0.152053	0.185421	0.207813	0.248047	0.289265	0.318017	0.372932	0.426522	0.496094	0.574409	0.657161	0.759759	0.882525	1.06074	1.32987	1.80241	2.27674	2.73847	3.64158	5.78866
0	0.0567636	0.0870049	0.116343	0.152188	0.185545	0.207813	0.248047	0.289406	0.318861	0.373124	0.427581	0.496094	0.577562	0.658757	0.759815	0.883086	1.06101	1.32998	1.8037	2.27871	2.74226	3.6416	5.806
0	0.0567798	0.0870911	0.116366	0.152364	0.185564	0.207813	0.248047	0.289486	0.319162	0.373382	0.427749	0.496094	0.578263	0.659795	0.761349	0.884551	1.06318	1.33051	1.80581	2.28534	2.74268	3.64351	5.8176
0	0.0569191	0.0873284	0.116531	0.152453	0.185577	0.207813	0.248047	0.289596	0.319221	0.373479	0.427838	0.496094	0.579371	0.660464	0.761616	0.88479	1.06509	1.33065	1.8076	2.2929	2.74395	3.64508	5.86655
0	0.056959	0.0873473	0.116666	0.152554	0.185584	0.207813	0.248047	0.289749	0.319299	0.374464	0.428904	0.496094	0.579543	0.660467	0.761832	0.884818	1.06539	1.33175	1.80923	2.29332	2.77196	3.6535	5.88532
0	0.0569601	0.087632	0.116811	0.152647	0.185682	0.207813	0.248047	0.290079	0.319638	0.374493	0.429135	0.496094	0.579597	0.660829	0.761872	0.885725	1.06738	1.33192	1.81054	2.29928	2.77325	3.67004	5.89277
0	0.0569779	0.0876561	0.116814	0.15269	0.185887	0.207813	0.248047	0.290367	0.319833	0.374562	0.430028	0.496094	0.579721	0.66111	0.762023	0.885848	1.06943	1.33205	1.81119	2.2999	2.77505	3.6742	5.94628
0	0.0570407	0.0876856	0.117079	0.152691	0.186263	0.207922	0.248047	0.29041	0.319938	0.374567	0.430904	0.496094	0.5798	0.662328	0.764226	0.887334	1.0696	1.33577	1.8115	2.30357	2.77987	3.68748	5.98925
0	0.0570737	0.0877811	0.117133	0.152773	0.186396	0.207997	0.248047	0.290806	0.320358	0.375619	0.430986	0.496094	0.580224	0.662439	0.765845	0.88774	1.0699	1.33577	1.81618	2.30745	2.78455	3.68748	5.99249
0	0.0571355	0.0879119	0.117321	0.152819	0.186941	0.208088	0.248047	0.290886	0.320541	0.376528	0.432081	0.496094	0.580403	0.664067	0.766802	0.88788	1.07019	1.33617	1.81628	2.30778	2.79283	3.68748	6.00353
0	0.0572074	0.0879232	0.117429	0.15306	0.187016	0.20827	0.248047	0.291393	0.321032	0.377003	0.432088	0.496094	0.580872	0.664401	0.767566	0.88822	1.07038	1.3369	1.81738	2.31663	2.79321	3.68748	6.01037
0.000277325	0.0575759	0.0879889	0.117482	0.153119	0.18703	0.208372	0.248047	0.291507	0.321176	0.377661	0.432855	0.496094	0.581155	0.664657	0.769563	0.889601	1.07062	1.33707	1.8223	2.32255	2.79631	3.68897	6.03352
0.000511362	0.0576484	0.0880087	0.117965	0.153252	0.187189	0.208739	0.248047	0.291574	0.321488	0.377971	0.433398	0.496094	0.581302	0.666218	0.770591	0.890838	1.07097	1.33905	1.82545	2.32321	2.79741	3.70786	6.03434
0.00198597	0.0576673	0.0881112	0.118527	0.153277	0.187262	0.208839	0.248047	0.292272	0.322225	0.378319	0.433452	0.496094	0.581355	0.666623	0.77088	0.891082	1.07275	1.33933	1.82875	2.32696	2.80313	3.71287	6.05272
0.0022897	0.0577276	0.0881234	0.118595	0.153372	0.187383	0.208925	0.248047	0.292426	0.322348	0.379436	0.433527	0.496094	0.581396	0.666634	0.771549	0.891725	1.07299	1.34029	1.83006	2.32718	2.80501	3.7207	6.05305
0.00372277	0.0577811	0.0881967	0.118599	0.15357	0.187389	0.209052	0.248047	0.292605	0.322834	0.379445	0.433964	0.496094	0.581803	0.667448	0.771729	0.891839	1.07429	1.3405	1.83048	2.33068	2.8096	3.7207	6.05611
0.00444347	0.0577843	0.0885196	0.11861	0.153849	0.187505	0.209066	0.248047	0.292853	0.322998	0.379519	0.434223	0.496094	0.582742	0.668297	0.773899	0.893325	1.0746	1.34133	1.83425	2.33166	2.81622	3.72896	6.06545
0.00452924	0.0577982	0.0885305	0.118698	0.153926	0.187571	0.209149	0.248435	0.293057	0.323005	0.379724	0.434831	0.496094	0.583444	0.668581	0.774746	0.894226	1.07516	1.34148	1.84325	2.33283	2.81933	3.72896	6.09608
0.00558281	0.0578445	0.088581	0.118743	0.154106	0.187602	0.209398	0.248522	0.29329	0.323052	0.380069	0.436391	0.496202	0.584123	0.66929	0.774878	0.894346	1.07674	1.34322	1.844	2.33317	2.82094	3.72896	6.10266
0.00598662	0.0578717	0.0886148	0.118785	0.154142	0.187658	0.209506	0.248656	0.29373	0.323673	0.380157	0.436795	0.49623	0.584228	0.670025	0.776461	0.895135	1.07746	1.34464	1.84518	2.33568	2.8213	3.72896	6.14458
0.00616209	0.0578808	0.0887953	0.118923	0.154301	0.187808	0.209618	0.249311	0.293795	0.324401	0.380302	0.437502	0.496403	0.585329	0.67038	0.776595	0.895861	1.07801	1.34475	1.84627	2.33889	2.82238	3.72983	6.14838
0.00686096	0.0579223	0.0888511	0.119205	0.154462	0.188019	0.209668	0.24977	0.293868	0.324579	0.381015	0.437514	0.496874	0.585483	0.670969	0.776791	0.896334	1.07934	1.34479	1.85326	2.33953	2.82411	3.73922	6.16761
0.0070104	0.0579429	0.088916	0.119414	0.1545	0.188207	0.210399	0.250456	0.293891	0.324854	0.381917	0.437894	0.497691	0.585958	0.671676	0.778047	0.897043	1.07957	1.34707	1.85326	2.34007	2.82574	3.74473	6.20071
0.00710839	0.0579497	0.0889387	0.119539	0.155097	0.188311	0.210436	0.250769	0.293891	0.325199	0.382202	0.438129	0.497783	0.586699	0.67204	0.778839	0.89765	1.07985	1.34834	1.85433	2.34084	2.83429	3.75363	6.25126
0.00711511	0.0582072	0.0890814	0.119585	0.155112	0.188516	0.210482	0.251159	0.293891	0.325357	0.38255	0.438627	0.497806	0.587345	0.672503	0.779292	0.901529	1.08124	1.34935	1.85563	2.34457	2.84928	3.7631	6.26479
0.00714033	0.0583223	0.0891271	0.11973	0.155236	0.188766	0.210516	0.251616	0.293891	0.325465	0.383395	0.438627	0.498035	0.587637	0.672537	0.779787	0.901835	1.08128	1.35334	1.85636	2.35318	2.85588	3.76527	6.28005
0.00792553	0.0583707	0.0893424	0.119744	0.155362	0.189094	0.21058	0.251972	0.293891	0.325702	0.383417	0.438627	0.498171	0.587783	0.674014	0.779884	0.905856	1.08175	1.3537	1.86453	2.35365	2.85962	3.77196	6.28418
0.00842082	0.0583998	0.0893999	0.12019	0.156211	0.189257	0.210755	0.252421	0.293891	0.326005	0.383955	0.438627	0.500409	0.587783	0.674662	0.779963	0.907916	1.08203	1.35403	1.86478	2.35495	2.86242	3.79155	6.36058
0.00899453	0.0586727	0.0894006	0.120227	0.156237	0.189307	0.211155	0.252654	0.293891	0.326631	0.384026	0.438648	0.50088	0.588215	0.674847	0.780139	0.908724	1.08241	1.35437	1.87008	2.35728	2.86335	3.79439	6.38713
0.00918946	0.0586737	0.089519	0.120521	0.156299	0.18933	0.211474	0.2529	0.293891	0.327047	0.384298	0.438673	0.501519	0.588931	0.674848	0.781271	0.909641	1.0831	1.35472	1.87103	2.36245	2.86585	3.79439	6.38754
0.00943431	0.0590937	0.0896906	0.120552	0.156366	0.189331	0.211517	0.253256	0.293891	0.327237	0.384404	0.438895	0.501684	0.589046	0.674937	0.781417	0.909891	1.08321	1.35544	1.87441	2.36679	2.88748	3.79439	6.44813
0.00948056	0.0592147	0.0897176	0.120648	0.156481	0.189623	0.211525	0.253275	0.293891	0.327362	0.384696	0.438942	0.502128	0.589602	0.675073	0.781564	0.91011	1.08407	1.35639	1.8769	2.3677	2.89242	3.80235	6.48735
0.00976246	0.0592868	0.0897339	0.120697	0.156533	0.189766	0.211536	0.253512	0.293891	0.328229	0.384747	0.43966	0.503079	0.58967	0.675145	0.781825	0.910142	1.08873	1.35824	1.88182	2.37457	2.89317	3.80867	6.59319
0.00985108	0.0594075	0.0897869	0.120732	0.156752	0.189883	0.211668	0.253729	0.293891	0.328669	0.385075	0.439904	0.504224	0.589908	0.676475	0.781913	0.910503	1.0891	1.35826	1.88213	2.38819	2.89376	3.85072	6.65746
0.00985741	0.0594762	0.0898205	0.120772	0.156908	0.190031	0.211679	0.254247	0.293891	0.32872	0.385246	0.440083	0.504241	0.591034	0.676594	0.782239	0.910891	1.09022	1.35868	1.88406	2.39756	2.89574	3.85072	6.79724
0.00988421	0.0597343	0.0898849	0.120807	0.157128	0.190057	0.211726	0.254267	0.293891	0.329074	0.385337	0.441497	0.504674	0.591241	0.67811	0.783193	0.911172	1.09052	1.36106	1.88623	2.40056	2.89856	3.85345	6.81113
0.010049	0.0600395	0.0900821	0.121246	0.157136	0.190164	0.211767	0.254372	0.293891	0.329584	0.385579	0.441704	0.50518	0.591619	0.678173	0.784157	0.911295	1.09113	1.36356	1.89429	2.40691	2.90041	3.87188	6.87377
0.0100514	0.0601359	0.090437	0.121459	0.157334	0.191006	0.212047	0.254453	0.293891	0.329799	0.385593	0.442095	0.506215	0.592011	0.678397	0.784393	0.914425	1.09198	1.36896	1.89916	2.41031	2.90813	3.8746	6.91735
0.0100794	0.0601638	0.0905596	0.121798	0.157559	0.191227	0.212079	0.255041	0.293891	0.329826	0.385643	0.442861	0.506695	0.59209	0.679115	0.784393	0.916547	1.09405	1.36901	1.90037	2.41263	2.9088	3.87766	6.93672
0.0102951	0.0604121	0.090602	0.121804	0.157772	0.191498	0.212125	0.255201	0.293945	0.330035	0.386061	0.443022	0.507644	0.592187	0.679462	0.784393	0.91687	1.09512	1.36926	1.90598	2.41709	2.91887	3.90555	6.97129
0.0104209	0.0604594	0.0909579	0.121846	0.157845	0.191572	0.212148	0.255761	0.294382	0.330269	0.386457	0.443976	0.507866	0.592587	0.679531	0.784393	0.918709	1.09535	1.37167	1.90831	2.4231	2.92987	3.90677	7.02766
0.010457	0.0605632	0.0909887	0.122024	0.158321	0.191596	0.212473	0.25587	0.294387	0.330362	0.386793	0.444151	0.508052	0.592695	0.680362	0.785407	0.919594	1.09547	1.37189	1.91357	2.43279	2.94179	3.91988	7.03065
0.010603	0.060584	0.0911184	0.122261	0.158382	0.191641	0.212872	0.256031	0.294433	0.330764	0.386831	0.444341	0.508069	0.593008	0.680762	0.786557	0.920068	1.09764	1.37326	1.9142	2.43516	2.94245	3.92095	7.05518
0.0107415	0.0607812	0.0912371	0.122456	0.158418	0.191649	0.213515	0.256072	0.294765	0.330816	0.386862	0.444918	0.510258	0.594292	0.681042	0.787433	0.921542	1.09946	1.37339	1.91788	2.43972	2.94612	3.92393	7.20957
0.0110826	0.0608256	0.0913038	0.122603	0.158509	0.192381	0.213822	0.256085	0.294859	0.331392	0.38718	0.445078	0.510284	0.595382	0.68107	0.787466	0.921548	1.09982	1.37588	1.91975	2.44298	2.94797	3.94133	7.29949
0.0112889	0.0608511	0.0913461	0.12262	0.158517	0.19257	0.213875	0.256244	0.29505	0.331637	0.387233	0.445746	0.510405	0.595419	0.6811	0.788002	0.921772	1.10095	1.37848	1.92958	2.4446	2.95541	3.96383	7.34699
0.0116236	0.0608867	0.0914436	0.122823	0.158605	0.192726	0.213917	0.256378	0.295183	0.331746	0.387364	0.446033	0.510584	0.5964	0.681944	0.788531	0.921942	1.101	1.37871	1.93076	2.44907	2.95886	3.96875	7.51441
0.0116602	0.0608968	0.0915388	0.123012	0.158695	0.192764	0.214015	0.256548	0.295253	0.331869	0.387847	0.446578	0.510667	0.596565	0.682079	0.789174	0.924409	1.10242	1.3821	1.93381	2.44939	2.96122	3.99284	7.51876
0.0117985	0.0609168	0.0916093	0.123588	0.1588	0.192774	0.214863	0.256682	0.295458	0.332035	0.388804	0.446886	0.511612	0.59675	0.682639	0.789319	0.925929	1.10253	1.38218	1.93645	2.45523	2.97656	4.00139	7.5294
0.0122702	0.060954	0.0917061	0.123672	0.158854	0.192807	0.214932	0.256801	0.295466	0.332862	0.388841	0.447029	0.511932	0.597622	0.682648	0.790088	0.927449	1.10292	1.38378	1.93668	2.46317	2.98295	4.01256	7.54405
0.0126224	0.0609869	0.0917198	0.123705	0.158854	0.192856	0.214955	0.25697	0.295707	0.333108	0.389149	0.447669	0.513545	0.59769	0.682688	0.790442	0.928425	1.1046	1.38474	1.93731	2.46633	2.98394	4.02399	7.54405
0.0126698	0.0610471	0.0917724	0.123924	0.158864	0.193217	0.21532	0.25753	0.296262	0.333299	0.389237	0.448091	0.514335	0.598127	0.682693	0.791414	0.929366	1.10492	1.38575	1.93731	2.46909	2.98688	4.02833	7.54557
0.012731	0.0611062	0.0918082	0.124039	0.159102	0.193351	0.215561	0.257561	0.296338	0.333726	0.389242	0.44843	0.515084	0.598531	0.682856	0.792417	0.929366	1.10526	1.38667	1.93785	2.46975	2.99617	4.03638	7.74384
0.0127598	0.0611588	0.0921526	0.124041	0.159103	0.193512	0.215866	0.258134	0.296376	0.333742	0.38952	0.448755	0.515164	0.59857	0.682975	0.79253	0.930469	1.10537	1.38706	1.93805	2.47562	2.99716	4.04041	7.78841
0.012968	0.0611637	0.0922716	0.124146	0.159212	0.193578	0.216042	0.258447	0.296649	0.334154	0.389619	0.44885	0.515329	0.598619	0.683703	0.792692	0.930469	1.10547	1.38706	1.93885	2.47786	2.99716	4.06274	7.91278
0.0131751	0.0611712	0.0923082	0.124173	0.159338	0.193823	0.216061	0.258523	0.296921	0.334183	0.390231	0.449383	0.515484	0.599566	0.683783	0.792723	0.930469	1.10553	1.38713	1.93953	2.48047	2.99716	4.09089	7.92568
0.0132104	0.0611783	0.0924355	0.124186	0.159552	0.193826	0.216224	0.258828	0.296951	0.334407	0.390774	0.450735	0.515847	0.599808	0.683908	0.792925	0.930469	1.10653	1.38779	1.94392	2.48047	3.01063	4.09474	7.95936
0.0133116	0.0613947	0.0925026	0.124222	0.159611	0.194131	0.216466	0.259399	0.297191	0.334438	0.391044	0.45104	0.516073	0.600359	0.684327	0.794115	0.930469	1.10687	1.38907	1.94507	2.48047	3.01762	4.13751	7.99951
0.0135222	0.0615303	0.0928134	0.124331	0.159701	0.194365	0.21656	0.259621	0.297263	0.334473	0.391091	0.45139	0.516286	0.600711	0.686786	0.794558	0.930469	1.10748	1.39062	1.94545	2.48047	3.02573	4.15802	8.2275
0.013869	0.0615527	0.0928332	0.124425	0.159973	0.194422	0.216769	0.259902	0.297447	0.335382	0.391191	0.452008	0.516313	0.60219	0.686837	0.794784	0.930469	1.11011	1.39242	1.95039	2.48047	3.02984	4.24098	8.23341
0.0138722	0.0615572	0.0929717	0.124559	0.160054	0.19457	0.217316	0.25992	0.297502	0.335744	0.391917	0.452102	0.516423	0.602483	0.687644	0.795225	0.930469	1.11024	1.40139	1.95531	2.48047	3.03022	4.25409	8.3312
0.0140284	0.0617334	0.092974	0.124628	0.160222	0.194607	0.217562	0.259927	0.297608	0.335875	0.392004	0.452742	0.51648	0.603335	0.687961	0.7953	0.930469	1.11472	1.40277	1.95565	2.48047	3.03031	4.2594	8.34741
0.0140658	0.0617648	0.0929804	0.124904	0.160374	0.194981	0.21771	0.259968	0.298115	0.336376	0.392212	0.453886	0.517016	0.604028	0.68926	0.795607	0.930469	1.11475	1.40295	1.95719	2.48047	3.03049	4.32319	8.35002
0.0140746	0.0618513	0.0929942	0.125193	0.160445	0.195163	0.21779	0.259996	0.298489	0.336443	0.392398	0.454714	0.517051	0.604699	0.689362	0.795654	0.930469	1.11568	1.40354	1.96244	2.48071	3.03108	4.37386	8.53423
0.0141245	0.0618676	0.0930446	0.12521	0.160994	0.195359	0.21788	0.26109	0.298508	0.33647	0.392434	0.454948	0.517306	0.605383	0.689382	0.795987	0.930469	1.1172	1.40501	1.97085	2.48397	3.04896	4.39158	8.54575
0.0142778	0.0619075	0.0930864	0.125214	0.161152	0.195522	0.217925	0.261523	0.299113	0.336612	0.392913	0.454975	0.518049	0.606	0.689647	0.796231	0.93064	1.11828	1.40519	1.97151	2.48464	3.04989	4.39579	8.54667
0.0143149	0.0620695	0.0931455	0.12529	0.161167	0.195523	0.217931	0.2617	0.29915	0.336824	0.393832	0.455555	0.518303	0.606079	0.690036	0.796585	0.930758	1.1191	1.40564	1.97551	2.48672	3.06558	4.42463	8.56342
0.014323	0.0620971	0.0931617	0.125577	0.161168	0.195583	0.217983	0.261715	0.299219	0.336879	0.394079	0.455632	0.518638	0.606657	0.690163	0.797338	0.931729	1.11979	1.40644	1.97582	2.48735	3.07522	4.43122	8.65925
0.0143808	0.0622901	0.0931762	0.125644	0.161367	0.195783	0.218257	0.262165	0.29958	0.33708	0.394363	0.455735	0.518834	0.60776	0.690674	0.797659	0.932247	1.12212	1.40715	1.97827	2.49284	3.08167	4.44177	8.7093
0.014386	0.0623251	0.093248	0.125683	0.161646	0.195789	0.218601	0.262191	0.299674	0.337723	0.394469	0.456151	0.519392	0.609289	0.690822	0.797908	0.933264	1.12499	1.40799	1.97827	2.4999	3.08995	4.45871	8.71225
0.0143889	0.0623679	0.0932546	0.125732	0.161939	0.195896	0.218701	0.262282	0.299678	0.338398	0.394667	0.456606	0.519406	0.60931	0.692369	0.799286	0.934573	1.125	1.40846	1.9797	2.5042	3.09406	4.46093	8.71698
0.0144816	0.062402	0.0933708	0.12585	0.161999	0.195949	0.218743	0.262307	0.299704	0.33851	0.394724	0.458359	0.519874	0.609429	0.69353	0.799748	0.935323	1.12687	1.41013	1.98387	2.50427	3.1051	4.46609	8.79718
0.0145187	0.0624197	0.0934088	0.125909	0.162247	0.196214	0.218841	0.262315	0.299728	0.338792	0.395267	0.459726	0.521561	0.610438	0.693617	0.800005	0.937058	1.12833	1.41358	1.98435	2.50629	3.11233	4.47173	8.95896
0.0145298	0.0624839	0.0934161	0.126085	0.162356	0.196231	0.219016	0.262718	0.300005	0.339001	0.395955	0.46105	0.522148	0.610515	0.695126	0.800224	0.938118	1.12867	1.41419	1.98438	2.51412	3.11305	4.47222	9.01394
0.0145625	0.062505	0.0934371	0.126109	0.162573	0.196363	0.219187	0.262727	0.300069	0.339426	0.396952	0.461185	0.522391	0.611016	0.695405	0.80316	0.938784	1.12875	1.41854	1.98438	2.51722	3.1309	4.48077	9.12739
0.0147052	0.062853	0.0935185	0.126138	0.16264	0.19638	0.219366	0.262771	0.300296	0.340195	0.397382	0.461508	0.522498	0.611174	0.695432	0.803975	0.939051	1.13012	1.41901	1.98438	2.51992	3.1363	4.53367	9.29385
0.0152103	0.0630465	0.0935886	0.126263	0.162716	0.196553	0.220275	0.262832	0.300373	0.340204	0.397808	0.461511	0.522901	0.612033	0.695716	0.804477	0.939547	1.1316	1.42286	1.98438	2.52033	3.13721	4.54817	9.31982
0.0157231	0.0630695	0.0936527	0.126277	0.162968	0.196709	0.220459	0.263382	0.300447	0.340425	0.397843	0.462367	0.523376	0.612231	0.695886	0.805927	0.940563	1.13204	1.42355	1.98679	2.52087	3.13757	4.56171	9.35114
0.015729	0.0631328	0.093703	0.126335	0.163019	0.196908	0.220494	0.263399	0.30059	0.341049	0.398149	0.462388	0.523726	0.612867	0.696222	0.806358	0.940855	1.13463	1.42467	1.99234	2.52307	3.14159	4.56998	9.61125
0.0157719	0.0631621	0.0937123	0.126519	0.163078	0.196923	0.220513	0.263513	0.300607	0.341484	0.398496	0.462785	0.524135	0.612902	0.696244	0.806431	0.941175	1.13691	1.42948	1.99982	2.52588	3.14765	4.57924	9.68665
0.0157837	0.0632065	0.0937673	0.126521	0.163212	0.197043	0.220839	0.263628	0.300823	0.342666	0.398986	0.46358	0.524154	0.612945	0.697074	0.806495	0.943046	1.13772	1.42952	1.99982	2.52959	3.14808	4.58181	9.7715
0.0160046	0.063227	0.0939759	0.126671	0.163276	0.197103	0.220974	0.26363	0.302468	0.34302	0.399029	0.463714	0.525167	0.61346	0.697421	0.806817	0.943704	1.13821	1.43154	2.00179	2.52959	3.15185	4.62649	9.85277
0.0160432	0.0632579	0.0942589	0.12698	0.163516	0.197235	0.221231	0.263743	0.302849	0.343132	0.399383	0.463842	0.525549	0.614183	0.697525	0.808059	0.944338	1.1383	1.43218	2.00546	2.52959	3.15203	4.6339	9.86616
0.0161594	0.063269	0.0942863	0.12707	0.163567	0.197323	0.221241	0.26381	0.302942	0.343331	0.39999	0.464213	0.526073	0.614238	0.698456	0.809277	0.944659	1.13933	1.4325	2.00991	2.53187	3.15209	4.65445	9.951
0.016311	0.0632819	0.0945448	0.127074	0.163595	0.197865	0.221539	0.263843	0.303163	0.343648	0.400021	0.464353	0.526091	0.614499	0.698836	0.809943	0.945797	1.13966	1.43328	2.01668	2.53212	3.1559	4.67661	13.9128
0.0163638	0.0632942	0.0945682	0.127233	0.163709	0.197902	0.221757	0.264173	0.303446	0.344019	0.400046	0.464683	0.526221	0.615422	0.698919	0.811845	0.946535	1.13986	1.43378	2.0253	2.54756	3.16133	4.68422	13.9128
0.0165026	0.0633006	0.0946609	0.127635	0.163954	0.199035	0.221775	0.264259	0.303557	0.344047	0.401036	0.464683	0.526518	0.615468	0.698942	0.811933	0.947703	1.14324	1.43509	2.02661	2.55137	3.16145	4.68468	14.1561
0.0165268	0.0633021	0.094721	0.127661	0.164107	0.199122	0.221835	0.264537	0.303631	0.344594	0.401567	0.464683	0.526633	0.615471	0.699107	0.812615	0.947726	1.14409	1.43647	2.02879	2.5538	3.16232	4.68533	14.206
0.017157	0.0634071	0.0948776	0.12771	0.164819	0.199192	0.222163	0.264952	0.303685	0.344707	0.401613	0.464683	0.526801	0.616742	0.699186	0.812702	0.94809	1.14458	1.43743	2.03367	2.5538	3.16557	4.71454	14.4486
0.017176	0.0634362	0.0948924	0.127927	0.165078	0.199235	0.222583	0.265053	0.303758	0.345133	0.401818	0.464683	0.526857	0.616797	0.700621	0.813124	0.948403	1.14525	1.44181	2.03769	2.55556	3.16862	4.72821	14.62
0.0172031	0.0635319	0.0949112	0.128042	0.165303	0.199388	0.222626	0.265089	0.303776	0.345593	0.401951	0.464683	0.527194	0.617563	0.70088	0.813414	0.948942	1.14549	1.44209	2.03786	2.56426	3.17783	4.7663	19.5391
0.0172967	0.063605	0.094941	0.128132	0.165456	0.199594	0.222771	0.265302	0.304022	0.345624	0.402402	0.464683	0.527351	0.617976	0.701162	0.813583	0.952372	1.14691	1.44357	2.03939	2.56465	3.19552	4.77111	19.66
0.0173145	0.0636152	0.0951636	0.128144	0.165614	0.199648	0.223144	0.265706	0.304437	0.345737	0.402721	0.464683	0.527521	0.618988	0.701583	0.81547	0.953078	1.14791	1.44635	2.04497	2.56735	3.20092	4.77589	19.7567
0.0173407	0.063648	0.0952601	0.128183	0.165626	0.199654	0.22324	0.265859	0.304621	0.345757	0.402795	0.464683	0.52873	0.619084	0.701822	0.815744	0.953498	1.15359	1.44635	2.04854	2.56981	3.20963	4.82495	19.9088
0.0174137	0.0637829	0.0954477	0.128387	0.165828	0.199813	0.223337	0.26602	0.304645	0.345926	0.403068	0.464683	0.528937	0.619301	0.70213	0.815939	0.955524	1.15395	1.44655	2.04957	2.57554	3.2199	4.83323	20.0366
0.0176353	0.064001	0.095543	0.128836	0.165852	0.20026	0.223445	0.266082	0.30467	0.346091	0.403114	0.464683	0.529074	0.619369	0.703111	0.816163	0.955779	1.15557	1.44996	2.05051	2.57565	3.22461	4.85955	20.3776
0.0177421	0.06415	0.095661	0.129218	0.166114	0.200447	0.223948	0.266252	0.304711	0.346563	0.403193	0.464683	0.529697	0.619676	0.703146	0.816445	0.957342	1.15571	1.45462	2.05168	2.57737	3.22461	4.87335	20.4138
0.0178533	0.0642101	0.0957751	0.129273	0.166146	0.200545	0.224019	0.266419	0.304728	0.346831	0.403429	0.464683	0.529972	0.620066	0.704246	0.817036	0.957604	1.15708	1.45614	2.06174	2.58681	3.23022	4.87335	20.4334
0.0179462	0.0643304	0.095777	0.129338	0.166255	0.200832	0.224092	0.266423	0.305095	0.347578	0.404554	0.464683	0.530065	0.620312	0.704298	0.817894	0.959757	1.1573	1.45769	2.06292	2.58767	3.23517	4.87335	20.5085
0.0181865	0.0643363	0.0958435	0.129415	0.166289	0.201123	0.224935	0.266429	0.305248	0.347713	0.404714	0.464683	0.530157	0.620312	0.704661	0.819056	0.961098	1.15857	1.45779	2.06546	2.58969	3.25615	4.87335	20.5085
0.0184667	0.0644293	0.0958505	0.129448	0.166401	0.201159	0.224972	0.266602	0.305443	0.347735	0.404748	0.464683	0.53041	0.620312	0.704933	0.819121	0.961908	1.16041	1.45844	2.07288	2.5969	3.25812	4.87335	20.5085
0.0185659	0.064468	0.0958586	0.129473	0.166658	0.201714	0.225081	0.26665	0.305512	0.347967	0.405142	0.464683	0.531402	0.620312	0.70578	0.819413	0.962542	1.16096	1.45891	2.07699	2.6016	3.26255	4.89184	20.6416
0.0187534	0.0645047	0.0960443	0.129505	0.167173	0.201759	0.225292	0.266787	0.305583	0.348912	0.405226	0.464683	0.53148	0.620312	0.707505	0.819497	0.962626	1.16162	1.45928	2.08347	2.60218	3.26726	4.92512	20.719
0.0188418	0.0645716	0.0961155	0.12958	0.16741	0.201813	0.225493	0.266812	0.305606	0.34894	0.405921	0.464747	0.53167	0.620312	0.707596	0.819878	0.962764	1.16179	1.45964	2.08526	2.60311	3.2682	4.95389	20.719
0.0189249	0.0646138	0.096294	0.12964	0.167658	0.202111	0.225581	0.267921	0.305691	0.34915	0.406083	0.465436	0.532188	0.620312	0.708168	0.81991	0.96323	1.16206	1.46084	2.08535	2.60597	3.27511	4.97375	20.719
0.0193222	0.0648466	0.096301	0.130058	0.167997	0.20219	0.2256	0.268031	0.305698	0.349372	0.406247	0.4658	0.53302	0.620313	0.709822	0.820102	0.964048	1.16286	1.46237	2.09048	2.61342	3.27934	4.97487	20.8551
0.0194312	0.0649035	0.096328	0.13007	0.168035	0.202299	0.225625	0.268038	0.305948	0.349657	0.40653	0.466003	0.533361	0.620313	0.710148	0.820827	0.965858	1.16382	1.46301	2.09267	2.62016	3.2893	4.98568	21.4098
0.0194934	0.0649307	0.0963898	0.130138	0.168292	0.202498	0.225858	0.268229	0.305975	0.349832	0.406645	0.466205	0.533603	0.620313	0.71029	0.821275	0.96605	1.16451	1.46547	2.09379	2.63044	3.29142	5.07004	21.9644
0.0195348	0.0650053	0.0964453	0.130266	0.1683	0.202504	0.225914	0.268303	0.305988	0.350108	0.406681	0.466709	0.533677	0.620313	0.710437	0.821468	0.967228	1.16508	1.46946	2.09412	2.63218	3.29253	5.08002	22.186
0.019578	0.065075	0.0964676	0.130284	0.168653	0.202633	0.225931	0.268391	0.306087	0.350791	0.406945	0.46698	0.534585	0.620315	0.711378	0.82301	0.968539	1.16635	1.4703	2.10135	2.63651	3.29571	5.09136
0.019602	0.0651273	0.0965474	0.130291	0.168933	0.202762	0.226111	0.268421	0.306175	0.350791	0.407211	0.467183	0.535614	0.620387	0.712124	0.823271	0.968653	1.16684	1.47076	2.10373	2.63725	3.30693	5.09956
0.0196339	0.0651345	0.0966257	0.130297	0.169057	0.202811	0.226147	0.268577	0.306247	0.350791	0.407333	0.467262	0.535914	0.620562	0.712461	0.823772	0.968966	1.16751	1.4716	2.10454	2.64272	3.30915	5.11362
0.019895	0.0651373	0.096658	0.13047	0.169259	0.202811	0.226279	0.268665	0.307043	0.350791	0.407409	0.467272	0.536304	0.620567	0.712658	0.824147	0.9703	1.1689	1.47189	2.10718	2.64661	3.31454	5.11362
0.0199693	0.0652303	0.0966683	0.130484	0.169336	0.202888	0.226773	0.268823	0.307314	0.350791	0.407558	0.467766	0.53646	0.621891	0.71293	0.825498	0.970881	1.16982	1.47323	2.10723	2.64827	3.31701	5.11362
0.0202749	0.0653117	0.0968009	0.130493	0.169371	0.203085	0.226943	0.268903	0.307934	0.350817	0.407795	0.467795	0.536802	0.621987	0.713181	0.82657	0.971357	1.1706	1.47814	2.10814	2.65041	3.31813	5.11362
0.0204093	0.0653407	0.0970111	0.130595	0.169424	0.203088	0.227127	0.268975	0.307979	0.35098	0.409109	0.46787	0.537629	0.622007	0.713218	0.826922	0.97161	1.17156	1.48028	2.10912	2.6551	3.31859	5.11362
0.0204488	0.0654056	0.0970635	0.130734	0.169836	0.2032	0.227783	0.269222	0.308449	0.351193	0.409498	0.468224	0.537978	0.622242	0.713467	0.827272	0.974528	1.17166	1.48108	2.11515	2.65627	3.32397	5.15432
0.0206628	0.0655	0.097069	0.130777	0.169919	0.203209	0.228184	0.269446	0.308842	0.351268	0.410106	0.469105	0.538233	0.62248	0.71386	0.827301	0.976256	1.17214	1.48112	2.11931	2.65737	3.33168	5.21951
0.020663	0.0655887	0.0970989	0.131053	0.169964	0.203336	0.22823	0.269467	0.309255	0.351294	0.410165	0.469274	0.538717	0.622672	0.714052	0.828134	0.977127	1.17274	1.48209	2.11931	2.66323	3.33381	5.23998
0.0206677	0.0656125	0.0971127	0.131068	0.170063	0.203609	0.228279	0.270118	0.309762	0.351544	0.410427	0.469318	0.539032	0.623437	0.714516	0.829641	0.977736	1.17284	1.48237	2.11987	2.66418	3.35163	5.25283
0.0206993	0.0657279	0.0971955	0.131344	0.170158	0.203723	0.228288	0.270352	0.310007	0.351746	0.410655	0.470313	0.53979	0.623437	0.714552	0.829706	0.97783	1.17332	1.48365	2.12136	2.66837	3.36119	5.28816
0.0208632	0.0657292	0.0975001	0.131498	0.170267	0.20409	0.22841	0.270506	0.310156	0.352019	0.410934	0.470828	0.539843	0.623437	0.714619	0.830018	0.978403	1.1737	1.48425	2.12251	2.66863	3.36865	5.29842
0.0209082	0.0657313	0.0978016	0.131528	0.170477	0.204277	0.228634	0.271086	0.310156	0.35227	0.411411	0.470915	0.539868	0.623437	0.714811	0.830669	0.97944	1.17557	1.48689	2.12756	2.67155	3.36898	5.30713
0.0210854	0.0658448	0.0978237	0.131541	0.170832	0.204358	0.228635	0.271278	0.310156	0.352415	0.412051	0.470925	0.540282	0.623438	0.715939	0.83074	0.979663	1.17624	1.48828	2.12859	2.67155	3.38874	5.31429
0.0211806	0.0659788	0.0978277	0.131707	0.171058	0.204395	0.229219	0.271289	0.310156	0.353069	0.412105	0.471327	0.540606	0.623438	0.71607	0.831032	0.980402	1.17687	1.49247	2.13181	2.67155	3.41973	5.31682
0.0213921	0.0660167	0.0979256	0.131893	0.171379	0.204419	0.229262	0.271563	0.310156	0.353143	0.41215	0.471683	0.541077	0.623438	0.716432	0.83125	0.9808	1.17723	1.49527	2.13224	2.67285	3.42615	5.31769
0.0214165	0.0661226	0.0979293	0.131899	0.171382	0.204603	0.229669	0.271619	0.310156	0.353608	0.413542	0.472222	0.541536	0.623438	0.717357	0.83125	0.9808	1.17768	1.49705	2.13378	2.68092	3.42731	5.3546
0.0214937	0.0664408	0.0979388	0.132245	0.17142	0.204673	0.229913	0.271672	0.310156	0.353788	0.413902	0.472356	0.542025	0.623438	0.71773	0.83125	0.981197	1.17801	1.49902	2.13429	2.68236	3.4275	5.35868
0.0215609	0.0665554	0.0980131	0.132382	0.171425	0.204698	0.230031	0.271859	0.310156	0.354244	0.413903	0.472519	0.542404	0.623438	0.718598	0.83125	0.982473	1.17902	1.4998	2.13539	2.68735	3.42815	5.38316
0.0215637	0.0667334	0.0980708	0.132563	0.171561	0.204815	0.230339	0.272563	0.310156	0.354329	0.413992	0.472749	0.544294	0.623438	0.718642	0.83125	0.982728	1.18057	1.5047	2.13645	2.68777	3.42918	5.39113
0.0216029	0.0667962	0.0980875	0.132593	0.171899	0.205043	0.230349	0.272782	0.310156	0.355192	0.414032	0.47298	0.545265	0.623438	0.718948	0.83125	0.983306	1.18077	1.50803	2.14263	2.6898	3.44448	5.39915
0.0216583	0.0668306	0.0981153	0.132852	0.172117	0.205549	0.230415	0.27284	0.310156	0.355222	0.414638	0.473197	0.545492	0.623438	0.719234	0.831302	0.983608	1.18116	1.50835	2.15061	2.69732	3.44693	5.40457
0.0218609	0.066925	0.0981691	0.132983	0.172461	0.205653	0.230713	0.272898	0.310156	0.355804	0.414679	0.473417	0.546027	0.623892	0.719558	0.831313	0.984999	1.18218	1.51029	2.15504	2.70186	3.45454	5.4216
0.0221985	0.0671054	0.0984062	0.133044	0.172529	0.205674	0.23092	0.272976	0.310156	0.356099	0.414881	0.473841	0.546186	0.625061	0.719751	0.83166	0.985657	1.18447	1.51205	2.15697	2.70458	3.45489	5.42202
0.0222294	0.0671373	0.0984702	0.133162	0.172543	0.205903	0.231279	0.273162	0.310156	0.356549	0.415625	0.474046	0.546626	0.625497	0.720571	0.83192	0.987225	1.18599	1.51297	2.15956	2.70722	3.45489	5.42542
0.0223645	0.0673662	0.0985865	0.133189	0.172666	0.206106	0.231587	0.273184	0.310156	0.357016	0.415625	0.475086	0.546668	0.625607	0.721492	0.832035	0.987707	1.18991	1.51344	2.16621	2.70877	3.45489	5.42682
0.0224507	0.0674268	0.0986236	0.13324	0.172671	0.206162	0.231799	0.273222	0.310156	0.357488	0.415625	0.475321	0.547559	0.625966	0.721667	0.832261	0.988282	1.19118	1.51673	2.17663	2.71241	3.47266	5.43246
0.0225231	0.0674288	0.0987416	0.133315	0.172753	0.206166	0.231906	0.273226	0.310156	0.357703	0.415625	0.475615	0.548238	0.6267	0.722332	0.832328	0.988298	1.19203	1.5186	2.17746	2.71496	3.49576	5.43909
0.0225675	0.067599	0.0987462	0.133369	0.173017	0.206365	0.231955	0.273323	0.310156	0.358478	0.415625	0.476067	0.548489	0.629041	0.722877	0.833042	0.989103	1.19212	1.51867	2.18466	2.7189	3.50042	5.44647
0.0225765	0.0678088	0.0988486	0.133433	0.17317	0.206518	0.232097	0.273382	0.310156	0.358525	0.415625	0.477544	0.548536	0.629442	0.72391	0.833296	0.990098	1.19277	1.51986	2.18603	2.72563	3.50979	5.44696
0.0226674	0.0678122	0.0989417	0.133444	0.173276	0.206578	0.232501	0.273618	0.310156	0.358862	0.415625	0.477671	0.54897	0.629844	0.72441	0.835007	0.991232	1.19336	1.52005	2.18624	2.72593	3.53673	5.45451
0.022722	0.067965	0.0989916	0.133498	0.173285	0.206663	0.232555	0.273777	0.310156	0.359184	0.415625	0.477849	0.549097	0.630388	0.725649	0.836957	0.991512	1.19729	1.52166	2.18963	2.72723	3.55149	5.46434
0.0227508	0.0680233	0.0990605	0.133509	0.173382	0.206674	0.232651	0.273884	0.310156	0.35951	0.415625	0.478744	0.54911	0.631123	0.726033	0.838908	0.991924	1.1974	1.52269	2.19086	2.72852	3.58743	5.50753
0.0227545	0.0680722	0.0991271	0.133533	0.173495	0.206973	0.232662	0.273931	0.310156	0.359982	0.415625	0.478768	0.549111	0.631219	0.726231	0.83927	0.992188	1.19886	1.5238	2.1922	2.72852	3.59211	5.52601
0.0227576	0.068092	0.0991792	0.133554	0.173549	0.207061	0.232731	0.274092	0.310156	0.360209	0.415625	0.479737	0.549745	0.631926	0.727579	0.840254	0.992188	1.20012	1.52616	2.19314	2.73025	3.60982	5.59437
0.0227837	0.0681667	0.0994242	0.133844	0.173808	0.20728	0.232796	0.27418	0.310156	0.360284	0.415625	0.479819	0.55071	0.632132	0.728078	0.843215	0.992188	1.20022	1.52658	2.19314	2.73247	3.61368	5.59619
0.022835	0.0682177	0.0994902	0.133858	0.174226	0.207338	0.232889	0.274274	0.310156	0.360387	0.415625	0.480526	0.55089	0.632392	0.728239	0.843454	0.992188	1.20244	1.52959	2.19314	2.73998	3.61403	5.59619
0.0228674	0.0684061	0.0995843	0.134022	0.174356	0.207394	0.232937	0.274442	0.310156	0.361175	0.415625	0.480673	0.551414	0.632667	0.729523	0.844119	0.992188	1.20303	1.53766	2.19314	2.74464	3.61644	5.59619
0.0228933	0.068433	0.0995968	0.134162	0.17437	0.207398	0.23301	0.274473	0.310156	0.361435	0.415625	0.480862	0.551895	0.633739	0.729955	0.844414	0.992188	1.20429	1.53912	2.19566	2.75353	3.62023	5.6227
0.0231077	0.0684459	0.099692	0.134398	0.174436	0.207598	0.233302	0.274528	0.310156	0.361929	0.415625	0.480933	0.552056	0.634322	0.730049	0.844456	0.99224	1.20527	1.53919	2.19919	2.76288	3.62068	5.62616
0.0231529	0.0685109	0.0999433	0.134615	0.174525	0.207656	0.233539	0.27459	0.310156	0.362113	0.415625	0.481287	0.552506	0.634693	0.730314	0.846104	0.992568	1.20648	1.54202	2.19928	2.76351	3.63527	5.62783
0.0234637	0.0685594	0.100186	0.134753	0.174607	0.207729	0.234227	0.274596	0.310156	0.362174	0.415625	0.481295	0.553044	0.635344	0.730378	0.846471	0.993052	1.20674	1.54266	2.20065	2.77325	3.64079	5.63098
0.0234942	0.0686002	0.100228	0.134809	0.17475	0.207812	0.234287	0.274688	0.310156	0.363373	0.415625	0.481888	0.553174	0.635641	0.730628	0.848105	0.994447	1.20898	1.54352	2.20136	2.77325	3.64158	5.63761
0.0235174	0.0686092	0.100262	0.134915	0.174864	0.207812	0.234369	0.274986	0.310156	0.36414	0.415625	0.482246	0.553234	0.63613	0.73071	0.850406	0.994603	1.20918	1.544	2.20186	2.77492	3.64267	5.65652
0.0235876	0.068684	0.100311	0.13492	0.174904	0.207812	0.23477	0.275214	0.310156	0.364199	0.415625	0.482981	0.553267	0.637065	0.731739	0.850699	0.995716	1.20932	1.54483	2.20646	2.77595	3.64515	5.65899
0.0236322	0.0688102	0.100553	0.135022	0.175059	0.207812	0.235022	0.275272	0.310156	0.364863	0.415625	0.483306	0.553883	0.637834	0.732299	0.851254	0.996118	1.21169	1.54539	2.2081	2.79538	3.66378	5.67357
0.0236681	0.0688165	0.100588	0.135133	0.175118	0.207812	0.235187	0.275313	0.310156	0.364916	0.415625	0.484908	0.55465	0.638182	0.733028	0.851317	0.996941	1.21172	1.54935	2.21076	2.80315	3.67004	5.67933
0.0238648	0.0689414	0.100613	0.135217	0.175161	0.207812	0.235308	0.275345	0.310156	0.365166	0.415625	0.484917	0.55465	0.638195	0.7334	0.851759	0.998969	1.21174	1.54977	2.21081	2.80781	3.68343	5.69172
0.0240496	0.0691465	0.100617	0.135272	0.175243	0.207812	0.235667	0.275476	0.310156	0.365566	0.415625	0.485043	0.55465	0.6387	0.733526	0.851836	0.999065	1.21174	1.55064	2.21695	2.80828	3.68748	5.70278
0.0240986	0.0693162	0.100693	0.135397	0.175252	0.207812	0.236184	0.275488	0.310156	0.365613	0.415625	0.485313	0.55465	0.639255	0.733548	0.852381	1.00005	1.21174	1.55078	2.21716	2.81426	3.70092	5.71779
0.0241209	0.0693331	0.100817	0.135466	0.175552	0.207812	0.236268	0.275726	0.310156	0.365945	0.415625	0.485354	0.554806	0.639657	0.733606	0.852449	1.00009	1.21174	1.55078	2.2186	2.82162	3.70786	5.72914
0.02414	0.0693695	0.100991	0.135863	0.175632	0.207812	0.236841	0.276356	0.310156	0.366153	0.415625	0.485413	0.555065	0.63968	0.73371	0.852692	1.00104	1.21174	1.55078	2.2197	2.8223	3.71074	5.73107
0.0243445	0.0695195	0.101023	0.135893	0.17569	0.207812	0.236965	0.276817	0.310156	0.366498	0.415625	0.485418	0.555108	0.640095	0.734088	0.852692	1.00123	1.21206	1.55078	2.22302	2.82483	3.71558	5.74646
0.0243951	0.0695366	0.101075	0.136003	0.175769	0.207812	0.237029	0.27691	0.310156	0.366613	0.415625	0.485533	0.555221	0.640108	0.734095	0.852924	1.00126	1.21288	1.5544	2.22408	2.82817	3.7207	5.80107
0.0244321	0.0698738	0.10121	0.136169	0.175934	0.207812	0.237476	0.277027	0.310156	0.366881	0.415625	0.486285	0.556297	0.640271	0.73524	0.853144	1.00219	1.2133	1.55626	2.22435	2.82912	3.7207	5.807
0.0245215	0.0699718	0.101356	0.136271	0.175945	0.207812	0.237517	0.277335	0.310156	0.366957	0.415625	0.487895	0.556436	0.640548	0.73606	0.853424	1.00511	1.21465	1.5577	2.23115	2.82958	3.7207	5.8331
0.0245986	0.0699938	0.101748	0.136394	0.175978	0.207812	0.237594	0.277379	0.310156	0.366981	0.415625	0.488301	0.556603	0.640702	0.736431	0.853662	1.00538	1.21535	1.5581	2.23229	2.82965	3.7207	5.85585
0.0246161	0.0701391	0.101865	0.136723	0.176055	0.207812	0.237805	0.277451	0.310156	0.367158	0.415625	0.488364	0.557077	0.641322	0.737174	0.853824	1.00576	1.21839	1.56011	2.23242	2.8344	3.7207	5.86871
0.0246959	0.0701877	0.101881	0.137027	0.176216	0.207812	0.238043	0.277635	0.310156	0.367299	0.415625	0.488673	0.558323	0.642145	0.7376	0.854194	1.00583	1.21906	1.56082	2.23242	2.83507	3.7207	5.88307
0.0247218	0.0702293	0.101916	0.13709	0.176225	0.207812	0.238266	0.277649	0.310156	0.368213	0.415625	0.489099	0.558858	0.642705	0.737776	0.855018	1.00608	1.21972	1.56178	2.23242	2.84332	3.72896	5.88646
0.024805	0.0702802	0.101946	0.137159	0.176228	0.207812	0.238612	0.277873	0.310156	0.369184	0.415625	0.489219	0.55891	0.642817	0.738088	0.85593	1.00619	1.21986	1.56879	2.23879	2.84412	3.72983	5.89048
0.025	0.0705514	0.101982	0.13725	0.176276	0.207812	0.238858	0.277931	0.310156	0.369219	0.415625	0.489828	0.56001	0.64398	0.738638	0.856171	1.0088	1.22225	1.57339	2.24297	2.84967	3.74002	5.89262
0.0250676	0.0706364	0.10209	0.137265	0.176291	0.207812	0.239049	0.27803	0.310156	0.369718	0.415625	0.489839	0.560915	0.644035	0.738968	0.856833	1.01077	1.22503	1.57458	2.24341	2.85021	3.74473	5.91824
0.0251116	0.0706765	0.10215	0.137367	0.176301	0.207812	0.239137	0.278449	0.310156	0.369875	0.415659	0.489914	0.561187	0.644132	0.739964	0.856833	1.01141	1.22726	1.57557	2.24632	2.85229	3.75363	5.96438
0.0251816	0.0707271	0.102164	0.137567	0.176541	0.207812	0.239177	0.278496	0.310156	0.370102	0.415777	0.490122	0.56132	0.644386	0.739972	0.856833	1.01202	1.22858	1.57588	2.2465	2.8586	3.75923	5.97921
0.0253457	0.0707314	0.102171	0.137768	0.176586	0.207812	0.239183	0.278508	0.310156	0.370151	0.415807	0.490615	0.561381	0.645122	0.740386	0.857339	1.01425	1.22912	1.57722	2.25033	2.86058	3.75927	5.98952
0.0253694	0.0708547	0.102292	0.137869	0.176849	0.207812	0.239207	0.278513	0.310156	0.370506	0.415856	0.491535	0.561529	0.64576	0.741555	0.859253	1.01453	1.22969	1.57857	2.25358	2.86597	3.7667	6.01472
0.0254248	0.0708612	0.102382	0.137993	0.177106	0.207812	0.239444	0.278896	0.310156	0.370899	0.41637	0.491561	0.562148	0.646773	0.742054	0.860002	1.0151	1.23102	1.57997	2.25398	2.87092	3.79439	6.01968
0.0254248	0.0709113	0.102421	0.13818	0.177162	0.207812	0.239567	0.2789	0.310156	0.371144	0.418405	0.491779	0.562557	0.647103	0.742553	0.861331	1.01666	1.23265	1.58026	2.2561	2.88017	3.81209	6.05982
0.0254348	0.0709406	0.102444	0.138376	0.177198	0.207812	0.239627	0.278909	0.310156	0.372743	0.418447	0.491945	0.563387	0.647452	0.742819	0.861699	1.01694	1.2348	1.58062	2.25737	2.88252	3.81226	6.08295
0.0254698	0.0709992	0.10248	0.138618	0.177319	0.207812	0.240064	0.279016	0.310156	0.372939	0.418807	0.492828	0.563457	0.649049	0.743342	0.862786	1.01781	1.2354	1.58149	2.26186	2.88994	3.81634	6.09589
0.0256012	0.0711606	0.102504	0.138646	0.177898	0.207812	0.240183	0.279196	0.310156	0.37309	0.418946	0.493039	0.563712	0.650629	0.743721	0.863117	1.01835	1.2363	1.58353	2.26401	2.89472	3.82256	6.11305
0.0256623	0.0712568	0.102505	0.138676	0.178026	0.207812	0.24022	0.279338	0.310156	0.373706	0.418961	0.493539	0.563743	0.651318	0.744141	0.863124	1.01852	1.23637	1.58635	2.2697	2.89592	3.84379	6.28005
0.0256747	0.0713728	0.102519	0.13873	0.178091	0.207812	0.240474	0.279569	0.310156	0.373905	0.418998	0.493886	0.564363	0.651535	0.744141	0.863361	1.01894	1.23702	1.58676	2.27022	2.89804	3.87619	6.29341
0.0257371	0.0715309	0.102624	0.138741	0.178325	0.207812	0.240481	0.279675	0.310156	0.373947	0.41927	0.493988	0.564395	0.65155	0.744141	0.863598	1.02217	1.23768	1.58794	2.27686	2.91201	3.88394	6.32083
0.0258139	0.0715943	0.102667	0.138787	0.178328	0.207812	0.240567	0.279754	0.310156	0.374379	0.419841	0.494167	0.564702	0.65336	0.744141	0.864226	1.02254	1.23812	1.58827	2.27941	2.91882	3.88537	6.33914
0.0260322	0.0717276	0.10275	0.13881	0.178387	0.207812	0.240662	0.27996	0.310384	0.374552	0.420039	0.494205	0.564865	0.654144	0.744141	0.864325	1.02333	1.24023	1.58979	2.27998	2.92116	3.88556	6.37593
0.0260641	0.071729	0.102779	0.138818	0.178415	0.207812	0.240662	0.280671	0.310614	0.375201	0.420093	0.494209	0.565117	0.654598	0.744141	0.864544	1.02376	1.24023	1.59115	2.27998	2.93952	3.92197	6.44634
0.0262464	0.0718568	0.102812	0.139042	0.178451	0.207812	0.24081	0.280719	0.310707	0.37528	0.420516	0.494679	0.565129	0.6552	0.744141	0.86532	1.026	1.24023	1.59153	2.28516	2.96295	3.94388	6.50656
0.0262464	0.0719347	0.102891	0.139084	0.178513	0.207812	0.241475	0.281212	0.311395	0.375442	0.421308	0.49479	0.565342	0.655509	0.744141	0.865606	1.02692	1.24023	1.59475	2.2867	2.97453	3.9541	6.60447
0.0262608	0.0720782	0.102937	0.139193	0.178529	0.207812	0.24155	0.281276	0.311503	0.375538	0.42154	0.495317	0.565456	0.65574	0.744985	0.865668	1.02801	1.24023	1.5966	2.29008	2.97656	3.95751	6.61162
0.0264042	0.0721195	0.102994	0.139224	0.178564	0.207812	0.24171	0.281434	0.311713	0.375671	0.422784	0.495516	0.565579	0.656047	0.745876	0.866429	1.02804	1.24023	1.60348	2.29262	2.97656	3.96875	6.62641
0.0264457	0.0721833	0.103113	0.139283	0.178816	0.207812	0.242231	0.281493	0.312019	0.376813	0.422986	0.495741	0.565666	0.656983	0.746077	0.866898	1.02826	1.24023	1.60518	2.29326	2.97767	3.98558	6.65649
0.026592	0.0725935	0.103182	0.139284	0.178881	0.207812	0.242317	0.281583	0.312253	0.376825	0.423041	0.496094	0.566053	0.657161	0.746452	0.866929	1.02839	1.24023	1.60574	2.29366	2.99716	3.99378	6.7163
0.0266304	0.0726291	0.103247	0.139384	0.179212	0.207812	0.242711	0.281721	0.312638	0.377132	0.423466	0.496094	0.568185	0.657161	0.746526	0.867106	1.03127	1.24023	1.60656	2.29785	2.99737	4.00402	6.72394
0.0267137	0.0727344	0.10325	0.139409	0.179219	0.207812	0.242771	0.281867	0.313621	0.377305	0.423798	0.496094	0.568625	0.657161	0.746791	0.867336	1.03132	1.24023	1.60782	2.29824	2.9997	4.02946	6.74378
0.0268043	0.0727633	0.103462	0.139424	0.179271	0.207812	0.242854	0.282173	0.313782	0.377355	0.423997	0.496094	0.568745	0.657161	0.747173	0.869013	1.03165	1.24023	1.61255	2.29902	3.0129	4.03392	6.81113
0.0269051	0.0727771	0.103516	0.139473	0.179476	0.207812	0.242908	0.282327	0.314112	0.377565	0.424107	0.496094	0.569611	0.657161	0.747851	0.869514	1.03292	1.24023	1.61379	2.29997	3.01305	4.08199	6.8289
0.0270156	0.0727777	0.10362	0.139817	0.179643	0.207812	0.242966	0.282433	0.314433	0.377648	0.424178	0.496094	0.570127	0.657161	0.748127	0.869545	1.03464	1.24023	1.61451	2.30055	3.01983	4.11036	6.8854
0.0270566	0.0729361	0.103718	0.139854	0.179806	0.207812	0.243235	0.282473	0.314752	0.377672	0.424421	0.496094	0.570195	0.657161	0.748475	0.869907	1.03573	1.24023	1.61577	2.30213	3.03084	4.12298	6.92854
0.0271745	0.073076	0.103846	0.139902	0.179884	0.207812	0.244054	0.28271	0.315022	0.377727	0.424573	0.496094	0.570277	0.657161	0.748551	0.871713	1.03654	1.24023	1.61592	2.31248	3.03181	4.13813	6.96156
0.0273329	0.0730789	0.103911	0.139917	0.179935	0.207812	0.24406	0.283147	0.315078	0.377911	0.424596	0.496094	0.570877	0.657161	0.749279	0.874296	1.03662	1.24023	1.61655	2.31424	3.0373	4.1479	7.05518
0.0274127	0.073125	0.103923	0.139988	0.180129	0.207812	0.244237	0.283192	0.315463	0.377959	0.424754	0.496094	0.570938	0.657161	0.749279	0.874525	1.03683	1.24062	1.61736	2.31812	3.04114	4.15802	7.1815
0.0274606	0.0731842	0.104207	0.140092	0.18036	0.207812	0.244308	0.2832	0.316007	0.3785	0.425052	0.496094	0.570999	0.657161	0.749279	0.87548	1.03818	1.24062	1.61889	2.33069	3.04525	4.15802	7.20059
0.0274652	0.0732448	0.104269	0.140267	0.180448	0.207812	0.244314	0.283235	0.31617	0.379026	0.425158	0.496094	0.571238	0.657161	0.749279	0.875685	1.03854	1.24063	1.62209	2.33723	3.05612	4.23053	7.24855
0.0276221	0.0732448	0.104495	0.140363	0.180547	0.207812	0.244343	0.283326	0.316718	0.379702	0.42541	0.496094	0.571552	0.657642	0.749279	0.87682	1.03863	1.24063	1.62344	2.33796	3.05963	4.2306	7.29949
0.0276361	0.0733755	0.104535	0.140399	0.180637	0.207812	0.244553	0.283353	0.316781	0.379941	0.425565	0.496094	0.572267	0.658549	0.749279	0.877187	1.03906	1.24063	1.62345	2.33989	3.06066	4.24612	7.47669
0.0276736	0.0734461	0.104646	0.140459	0.18077	0.207812	0.244638	0.283394	0.3172	0.380507	0.425961	0.496094	0.572881	0.659266	0.749279	0.877366	1.03906	1.24184	1.62474	2.34007	3.06259	4.32103	7.51864
0.027683	0.07346	0.104806	0.140527	0.180797	0.207812	0.244779	0.283689	0.317367	0.380601	0.426147	0.496094	0.573591	0.65968	0.749279	0.877556	1.03906	1.24394	1.63009	2.34007	3.06397	4.33968	7.54405
0.0277175	0.0734974	0.104816	0.140757	0.18083	0.207812	0.24529	0.283721	0.317971	0.381135	0.426198	0.496094	0.573807	0.66012	0.749452	0.877682	1.03906	1.24595	1.63071	2.34007	3.06439	4.34376	7.54405
0.0277325	0.0735181	0.105143	0.140776	0.180855	0.207812	0.245468	0.283754	0.318063	0.381399	0.426393	0.496094	0.573863	0.66089	0.749718	0.879739	1.03906	1.24648	1.64033	2.34007	3.0693	4.3516	7.55752
0.0277325	0.0735253	0.10526	0.14086	0.181417	0.207812	0.24553	0.283866	0.318373	0.381459	0.426831	0.496094	0.574256	0.660952	0.749857	0.880198	1.04043	1.24687	1.64109	2.3404	3.07738	4.3954	7.64932
0.0277397	0.0735868	0.105387	0.140903	0.181593	0.207812	0.245583	0.284044	0.318494	0.381509	0.427258	0.496094	0.574498	0.662198	0.749873	0.881148	1.04064	1.24726	1.64137	2.34084	3.09311	4.3954	7.71254
0.0277434	0.0735973	0.105415	0.14102	0.181731	0.207812	0.245949	0.284082	0.31957	0.381598	0.427892	0.496094	0.574596	0.662252	0.750038	0.881465	1.04175	1.24859	1.64362	2.346	3.09421	4.3954	7.79307
0.0277772	0.0737363	0.105588	0.14179	0.181853	0.207812	0.246274	0.284244	0.319698	0.381638	0.428009	0.496094	0.575798	0.662726	0.75159	0.881674	1.04183	1.24868	1.64398	2.34767	3.09461	4.3954	7.79774
0.0278261	0.073739	0.105767	0.142018	0.18193	0.207812	0.246466	0.284247	0.319733	0.381716	0.428781	0.496094	0.575922	0.662904	0.751758	0.881674	1.04249	1.24916	1.64449	2.34962	3.09531	4.40094	7.80773
0.0278708	0.0738827	0.106	0.14214	0.182078	0.207812	0.246489	0.284269	0.319778	0.382495	0.428829	0.496094	0.575924	0.662933	0.751803	0.881674	1.04276	1.24966	1.64494	2.35318	3.09544	4.40249	7.85279
0.0279163	0.0740426	0.106132	0.142174	0.182211	0.207812	0.246511	0.284283	0.320095	0.382582	0.429542	0.496381	0.576154	0.663477	0.751833	0.881674	1.04284	1.2501	1.64519	2.35745	3.10533	4.40956	7.86134
0.0279658	0.0740455	0.106218	0.142221	0.182254	0.207812	0.246632	0.284332	0.3204	0.382608	0.429759	0.496466	0.576159	0.6635	0.751863	0.881682	1.043	1.25308	1.64614	2.36265	3.10777	4.40965	7.96826
0.0280029	0.0740574	0.10622	0.142423	0.182308	0.207812	0.246638	0.284457	0.320798	0.382675	0.429814	0.4965	0.576584	0.663776	0.752676	0.882139	1.04417	1.25467	1.64744	2.36385	3.10852	4.43548	8.03568
0.0281461	0.07412	0.106261	0.142569	0.182364	0.207812	0.246854	0.284581	0.321123	0.382731	0.429831	0.49664	0.57726	0.664734	0.753531	0.88293	1.0454	1.25527	1.64865	2.36418	3.12243	4.43697	8.17938
0.0282057	0.0741321	0.106271	0.142749	0.182394	0.207812	0.246947	0.284627	0.321232	0.382871	0.430363	0.496763	0.577383	0.66556	0.754958	0.882989	1.0454	1.25563	1.64977	2.37638	3.12509	4.44555	8.20113
0.0282504	0.0741401	0.106318	0.143029	0.182614	0.207812	0.247744	0.285186	0.321282	0.383849	0.430969	0.49728	0.577699	0.666062	0.755003	0.883301	1.04552	1.25837	1.65003	2.38239	3.12847	4.45084	8.2352
0.0283108	0.0741655	0.106385	0.143098	0.182712	0.207812	0.248046	0.285191	0.3221	0.384194	0.431215	0.497697	0.577719	0.666186	0.755547	0.883393	1.04626	1.25996	1.65986	2.3824	3.13757	4.47173	8.3439
0.0284623	0.0741871	0.106478	0.143145	0.182729	0.207812	0.248047	0.285885	0.322689	0.384289	0.431864	0.498391	0.578835	0.66726	0.755963	0.883497	1.04704	1.26154	1.66167	2.38389	3.13962	4.47729	8.4201
0.0284649	0.0743116	0.10655	0.143289	0.182961	0.207812	0.248047	0.286257	0.32285	0.384493	0.433154	0.498496	0.579152	0.667496	0.756287	0.883627	1.04718	1.2616	1.66334	2.3908	3.143	4.48853	8.43058
0.0285129	0.0743655	0.106593	0.143371	0.182987	0.207812	0.248047	0.286282	0.323541	0.384918	0.433539	0.498505	0.57928	0.667754	0.75662	0.883742	1.0472	1.26302	1.66395	2.39293	3.14349	4.49045	8.45598
0.0285254	0.0744149	0.10666	0.143637	0.18349	0.207812	0.248047	0.286377	0.323597	0.384974	0.433798	0.498505	0.579751	0.669042	0.756939	0.883806	1.04772	1.26439	1.66395	2.39667	3.15325	4.51659	8.54594
0.0286698	0.0744226	0.106686	0.143638	0.183523	0.207812	0.248047	0.286452	0.323686	0.385343	0.434018	0.499693	0.579868	0.669867	0.756997	0.883947	1.04777	1.2648	1.6651	2.39855	3.15386	4.5269	8.56712
0.028722	0.0744242	0.106781	0.143643	0.183601	0.207812	0.248047	0.287257	0.324068	0.385919	0.434082	0.500069	0.580034	0.670952	0.757777	0.884319	1.04808	1.2648	1.66938	2.39876	3.15928	4.52735	8.61489
0.0287242	0.0744261	0.106932	0.14382	0.183684	0.207812	0.248047	0.28734	0.324113	0.385956	0.434422	0.500371	0.580122	0.671072	0.75787	0.884553	1.05073	1.2648	1.6699	2.40106	3.1634	4.54395	8.67111
0.0287269	0.074644	0.106937	0.143902	0.183697	0.207812	0.248047	0.287732	0.324483	0.386066	0.434426	0.500568	0.580146	0.671298	0.758176	0.885351	1.05181	1.2648	1.67024	2.40364	3.18884	4.54919	8.91307
0.0287791	0.0746835	0.106971	0.144075	0.183973	0.207812	0.248047	0.287748	0.325315	0.386312	0.43504	0.501087	0.581402	0.672153	0.758231	0.885408	1.05187	1.2648	1.67636	2.40691	3.19147	4.62597	9.01394
0.0289365	0.0747911	0.107079	0.144138	0.184005	0.207812	0.248047	0.287757	0.325436	0.386404	0.435147	0.501138	0.581971	0.672379	0.760024	0.886231	1.05237	1.2648	1.67845	2.41196	3.19554	4.63144	9.08665
0.0289573	0.0748539	0.107178	0.144143	0.184302	0.207812	0.248047	0.288162	0.325982	0.386768	0.435156	0.501182	0.582088	0.672786	0.760062	0.886245	1.05255	1.2648	1.68448	2.41396	3.19587	4.6339	9.20982
0.0289581	0.0749973	0.107207	0.14416	0.184325	0.207812	0.248047	0.288264	0.326109	0.387031	0.435289	0.50138	0.582328	0.672939	0.760559	0.887321	1.05329	1.2648	1.6845	2.4208	3.20229	4.6339	9.22758
0.0289662	0.0750152	0.107214	0.144265	0.184357	0.207812	0.248047	0.288473	0.326673	0.387361	0.435881	0.501414	0.582664	0.67324	0.760965	0.887502	1.05341	1.2648	1.68515	2.42477	3.20547	4.63392	9.23596
0.0290768	0.075029	0.107245	0.14429	0.1847	0.207812	0.248047	0.289464	0.326896	0.387375	0.436154	0.502003	0.582786	0.673243	0.76176	0.887758	1.05367	1.2648	1.68657	2.42621	3.21083	4.64627	9.26802
0.0291212	0.075156	0.107292	0.144372	0.184784	0.207812	0.248047	0.289566	0.326927	0.387412	0.436674	0.502152	0.583073	0.673564	0.761954	0.888024	1.05401	1.2648	1.68781	2.42778	3.21937	4.65512	9.43015
0.0291636	0.0751583	0.107319	0.144395	0.184793	0.207812	0.248047	0.289664	0.326939	0.387571	0.437176	0.50216	0.583473	0.673689	0.762574	0.888668	1.0569	1.26563	1.68895	2.43279	3.22461	4.71351	9.48175
0.0295699	0.0751719	0.10734	0.144402	0.184931	0.207812	0.248047	0.289815	0.327006	0.387759	0.437392	0.502262	0.583564	0.673833	0.763272	0.890622	1.0584	1.26619	1.69105	2.43757	3.22461	4.7439	9.50612
0.0296162	0.0752884	0.107482	0.144488	0.185051	0.207812	0.248047	0.289962	0.327054	0.387796	0.437468	0.502738	0.583623	0.674993	0.763661	0.890836	1.05863	1.26639	1.69111	2.43765	3.2288	4.75827	9.51573
0.0297307	0.0753635	0.107806	0.1445	0.185126	0.207812	0.248047	0.290165	0.327152	0.387805	0.438035	0.503074	0.583878	0.67517	0.764682	0.891725	1.0591	1.26788	1.6916	2.4381	3.24573	4.7837	9.53891
0.0297793	0.0753689	0.107838	0.144547	0.185317	0.207812	0.248047	0.290781	0.327246	0.387849	0.438121	0.503262	0.58395	0.675805	0.765147	0.894346	1.05934	1.26859	1.69195	2.44298	3.26264	4.812	13.2374
0.0298033	0.0753778	0.107934	0.144598	0.185421	0.207812	0.248047	0.29079	0.327393	0.38792	0.438627	0.503443	0.584073	0.67633	0.765375	0.894346	1.05964	1.26887	1.69497	2.44298	3.27055	4.82731	13.2374
0.0298299	0.0754025	0.108003	0.144724	0.185643	0.207812	0.248047	0.291037	0.32752	0.389039	0.438627	0.503898	0.584078	0.676939	0.765412	0.894346	1.05964	1.27041	1.69588	2.44337	3.2744	4.83001	13.5362
0.0298904	0.0754239	0.108268	0.144875	0.186229	0.207812	0.248047	0.291581	0.327904	0.390845	0.438627	0.503964	0.584499	0.677148	0.766229	0.895473	1.05964	1.27068	1.69611	2.44717	3.28814	4.83434	13.6696
0.0299657	0.0754558	0.108352	0.144879	0.186236	0.207813	0.248047	0.29205	0.328339	0.390934	0.438627	0.503994	0.584521	0.677455	0.766411	0.89562	1.05964	1.27237	1.69779	2.44722	3.28958	4.85078	14.1408
0.0300296	0.0755621	0.108389	0.144923	0.186294	0.207813	0.248047	0.292098	0.328629	0.391107	0.439466	0.504123	0.585807	0.677562	0.766425	0.895957	1.0601	1.27317	1.70013	2.44826	3.29253	4.87335	14.1561
0.0300375	0.0756254	0.108504	0.145208	0.186436	0.207813	0.248047	0.29213	0.328767	0.391225	0.4395	0.505032	0.586758	0.677735	0.766604	0.897062	1.06101	1.2735	1.70025	2.44933	3.29266	4.87335	14.3138
0.030065	0.0756329	0.108525	0.145265	0.186531	0.207813	0.248047	0.292345	0.32887	0.39154	0.439551	0.505076	0.586761	0.677928	0.766614	0.897867	1.06135	1.27717	1.70105	2.45142	3.29297	4.87335	14.3546
0.0300691	0.0757589	0.108596	0.145265	0.186532	0.207813	0.248047	0.292478	0.329382	0.391662	0.439693	0.505096	0.586832	0.678185	0.767052	0.898071	1.06451	1.27761	1.70354	2.45303	3.30511	4.87335	14.3995
0.0300706	0.075977	0.108663	0.145316	0.186683	0.207813	0.248047	0.292544	0.3295	0.391838	0.439695	0.505209	0.587734	0.67867	0.768349	0.898703	1.06491	1.27881	1.70493	2.45429	3.30693	4.88776	18.6761
0.0300792	0.0760277	0.108682	0.145323	0.186711	0.207813	0.248047	0.292756	0.329554	0.391941	0.439704	0.505374	0.587783	0.678918	0.768473	0.899002	1.06559	1.27986	1.70701	2.46558	3.31701	4.90764	18.7682
0.0301846	0.0760341	0.108738	0.145578	0.186737	0.207813	0.248047	0.292882	0.329569	0.392315	0.439998	0.506052	0.587783	0.679026	0.769532	0.900061	1.06838	1.28004	1.70891	2.46706	3.32227	4.93952	18.8025
0.0302158	0.076049	0.108801	0.145614	0.187061	0.208315	0.248047	0.292898	0.330172	0.392568	0.44033	0.506235	0.588167	0.679793	0.769688	0.900176	1.07074	1.28029	1.71	2.47612	3.34472	4.96805	18.8662
0.0302749	0.0760871	0.108879	0.145771	0.187187	0.208622	0.248047	0.293202	0.330559	0.392613	0.440387	0.506645	0.588869	0.680145	0.769745	0.900294	1.07079	1.2804	1.71045	2.48047	3.34751	4.97336	18.9703
0.0303046	0.0761035	0.108926	0.145784	0.187224	0.208649	0.248047	0.29324	0.330741	0.392645	0.440676	0.507021	0.588933	0.680764	0.770522	0.900555	1.07146	1.28045	1.71062	2.48047	3.3609	4.97486	19.0625
0.0303736	0.0761229	0.108937	0.145797	0.187502	0.208917	0.248047	0.293324	0.331087	0.392731	0.44082	0.507173	0.589602	0.681564	0.771819	0.901334	1.07259	1.2814	1.71234	2.48047	3.3738	4.98568	19.2728
0.0304484	0.0761437	0.108966	0.145973	0.187569	0.208967	0.248047	0.293643	0.331092	0.393421	0.440885	0.507182	0.59038	0.681901	0.77205	0.903951	1.07293	1.28229	1.71613	2.48047	3.37545	5.02953	19.4839
0.0304815	0.0762158	0.109102	0.146227	0.187767	0.208971	0.248047	0.293891	0.331118	0.393739	0.441119	0.507586	0.591045	0.681943	0.772452	0.905278	1.07324	1.2825	1.72073	2.48047	3.37927	5.03438	19.4839
0.0305171	0.0764564	0.109106	0.14651	0.187778	0.209085	0.248047	0.293891	0.331348	0.393838	0.441395	0.507801	0.591468	0.682741	0.772866	0.905327	1.07412	1.28452	1.72686	2.48047	3.39991	5.03698	19.4839
0.0306458	0.0764627	0.109173	0.146514	0.187924	0.20946	0.248047	0.293891	0.331448	0.394741	0.442123	0.507869	0.592243	0.682869	0.774231	0.905795	1.07468	1.28763	1.73096	2.48047	3.40028	5.05794	19.4839
0.0306619	0.0765868	0.109179	0.146543	0.188178	0.209579	0.248047	0.293891	0.331764	0.394845	0.442832	0.507952	0.59234	0.683508	0.774432	0.905997	1.07662	1.28804	1.73633	2.48047	3.41349	5.11362	19.5249
0.0307138	0.076672	0.109462	0.146697	0.188203	0.209684	0.248047	0.293891	0.332065	0.394931	0.442888	0.507954	0.59276	0.683848	0.774469	0.906249	1.07745	1.28929	1.73633	2.48047	3.41575	5.11362	19.6145
0.0308629	0.0767837	0.109517	0.146757	0.18825	0.209697	0.248047	0.293891	0.332185	0.395041	0.44291	0.508123	0.592843	0.683871	0.775654	0.907313	1.07747	1.29116	1.7416	2.48047	3.41698	5.11362	19.7474
0.0310702	0.0768269	0.109553	0.146786	0.188263	0.209774	0.248049	0.293891	0.33241	0.395073	0.443185	0.508143	0.593272	0.683891	0.775666	0.907504	1.08342	1.29178	1.7439	2.48047	3.42504	5.11993	20.0903
0.031094	0.0768795	0.109676	0.146875	0.188407	0.209775	0.24855	0.293891	0.33258	0.395139	0.443271	0.508236	0.593629	0.68413	0.775726	0.908839	1.08404	1.2928	1.74538	2.48047	3.42615	5.12747	20.2261
0.0311041	0.0769808	0.10973	0.146908	0.188637	0.209893	0.248557	0.293891	0.33329	0.395598	0.443501	0.508494	0.593645	0.684227	0.775976	0.910069	1.08548	1.29285	1.74541	2.48359	3.42731	5.13734	20.2261
0.031197	0.0770493	0.109734	0.147206	0.188698	0.210261	0.248591	0.293891	0.333512	0.395809	0.44386	0.509286	0.594267	0.684321	0.776166	0.910579	1.08634	1.29306	1.74732	2.48861	3.43596	5.15328	20.3005
0.0312544	0.0771295	0.109748	0.147271	0.189024	0.210641	0.248594	0.293891	0.333951	0.395833	0.443922	0.510561	0.59475	0.684899	0.776323	0.910657	1.08701	1.29452	1.75104	2.48961	3.43994	5.15418	20.8551
0.0314041	0.0772588	0.109813	0.147518	0.189046	0.210715	0.248971	0.293891	0.33429	0.396493	0.44407	0.510833	0.596046	0.685147	0.77734	0.910895	1.08728	1.29482	1.75159	2.49284	3.44638	5.15432	21.4098
0.0314112	0.0772611	0.109817	0.147519	0.189166	0.210764	0.249126	0.293891	0.334468	0.396649	0.444387	0.511301	0.596068	0.685266	0.777688	0.912187	1.08847	1.29591	1.75352	2.49284	3.44684	5.15754	21.9644
0.0314628	0.077273	0.109845	0.14777	0.189622	0.210797	0.249165	0.293891	0.334504	0.397159	0.444502	0.511737	0.596087	0.685327	0.777967	0.91301	1.08853	1.29615	1.75396	2.49284	3.45037	5.16275	22.186
0.0314836	0.0775384	0.109963	0.147781	0.189806	0.210852	0.249331	0.293891	0.334607	0.397434	0.444747	0.511758	0.596195	0.685867	0.778197	0.913902	1.08984	1.29623	1.75396	2.49559	3.45489	5.16473
0.0318272	0.0776193	0.11001	0.147846	0.189814	0.210914	0.249349	0.293989	0.334814	0.397512	0.444969	0.511771	0.596467	0.685897	0.77851	0.914065	1.08998	1.29655	1.75416	2.49816	3.46293	5.18405
0.0318511	0.0779327	0.110038	0.147903	0.189886	0.210969	0.249557	0.294231	0.334972	0.397582	0.445076	0.512173	0.596781	0.686036	0.781045	0.915075	1.09071	1.29665	1.75559	2.5016	3.46438	5.19309
0.0318735	0.0780878	0.110078	0.14795	0.189942	0.211002	0.250068	0.295188	0.335096	0.397765	0.445726	0.512252	0.597117	0.686355	0.781355	0.915789	1.09149	1.29744	1.757	2.50184	3.46865	5.20512
0.0318974	0.0781047	0.110096	0.148102	0.189964	0.211004	0.25014	0.295231	0.335159	0.398323	0.446109	0.51351	0.59861	0.687021	0.781483	0.916512	1.09386	1.29924	1.75776	2.50826	3.47266	5.21951
0.0319437	0.0781818	0.11012	0.148141	0.19005	0.211322	0.250333	0.295394	0.335509	0.398633	0.44626	0.514013	0.598756	0.687144	0.782242	0.916903	1.09448	1.30114	1.75804	2.5109	3.47444	5.23199
0.0319723	0.0781928	0.110209	0.148163	0.190158	0.211476	0.250537	0.295604	0.335638	0.398917	0.446303	0.514089	0.59903	0.687219	0.782805	0.917722	1.09463	1.30117	1.75854	2.51535	3.4815	5.24066
0.0320205	0.0783328	0.110261	0.148164	0.190295	0.21161	0.250568	0.295769	0.336585	0.399031	0.446651	0.514594	0.599291	0.687666	0.782827	0.917818	1.09489	1.30147	1.75886	2.51716	3.48387	5.25252
0.032037	0.0783671	0.110348	0.148293	0.190392	0.211826	0.2508	0.296117	0.336761	0.399223	0.44734	0.514689	0.600334	0.688023	0.783272	0.917962	1.09642	1.30379	1.76146	2.5253	3.51801	5.27077
0.0320847	0.0783702	0.11039	0.148311	0.190457	0.211881	0.25093	0.296314	0.336951	0.399486	0.447556	0.514758	0.601144	0.688122	0.784393	0.918329	1.09699	1.30452	1.7651	2.52792	3.53067	5.28503
0.032123	0.0783867	0.110736	0.148358	0.190532	0.212181	0.251331	0.2965	0.336986	0.3998	0.44797	0.514787	0.601225	0.688428	0.784393	0.91848	1.09825	1.30514	1.76842	2.52959	3.54085	5.28916
0.0322212	0.0785591	0.110781	0.148366	0.190553	0.21219	0.251405	0.296545	0.337248	0.399859	0.447972	0.515104	0.601528	0.688789	0.784393	0.919133	1.09916	1.30596	1.76953	2.52959	3.55565	5.29007
0.0323128	0.0786097	0.110798	0.148369	0.190884	0.212372	0.251461	0.29658	0.337255	0.400031	0.448298	0.515574	0.601884	0.688883	0.784459	0.920654	1.09941	1.30623	1.76969	2.52959	3.56302	5.30202
0.0324159	0.0786474	0.110865	0.148782	0.191355	0.212422	0.252249	0.296899	0.337599	0.400327	0.448315	0.516022	0.60247	0.689484	0.784868	0.920756	1.09981	1.30627	1.77113	2.52959	3.589	5.32246
0.0324596	0.0786873	0.110873	0.148987	0.191538	0.21243	0.252297	0.296979	0.337767	0.400397	0.448357	0.516391	0.602652	0.689518	0.785297	0.921725	1.09984	1.30732	1.77239	2.52959	3.5909	5.32696
0.0325228	0.0787363	0.110882	0.14901	0.191796	0.212477	0.252567	0.297022	0.337816	0.4005	0.448744	0.517666	0.6029	0.690105	0.78533	0.921922	1.10254	1.30767	1.7748	2.53461	3.59345	5.33322
0.0325361	0.0787748	0.111014	0.149078	0.191808	0.212732	0.252777	0.297166	0.337831	0.400573	0.449072	0.517758	0.602921	0.690194	0.788175	0.922464	1.10288	1.30976	1.77815	2.54024	3.60181	5.33437
0.0325547	0.0789398	0.111248	0.149236	0.192084	0.212796	0.252853	0.29784	0.337927	0.400601	0.449447	0.517791	0.602929	0.69032	0.788278	0.922605	1.10473	1.31243	1.77879	2.54472	3.61905	5.34054
0.0326037	0.0790809	0.111266	0.149298	0.192086	0.212869	0.253137	0.298048	0.338012	0.400657	0.449506	0.517927	0.603374	0.690322	0.788382	0.923507	1.10498	1.31424	1.78346	2.55107	3.62023	5.3444
0.0326236	0.0790879	0.111804	0.149355	0.192197	0.212889	0.253268	0.29838	0.338025	0.400666	0.449522	0.518305	0.603954	0.69096	0.789541	0.927088	1.10572	1.31428	1.78453	2.5511	3.62068	5.35124
0.0326451	0.0791133	0.111872	0.149386	0.192536	0.212907	0.253326	0.298512	0.338446	0.400668	0.449583	0.518561	0.604146	0.690989	0.789633	0.927215	1.10579	1.31764	1.78651	2.55317	3.62193	5.3546
0.0327744	0.079256	0.111987	0.149404	0.192588	0.212933	0.253453	0.298723	0.339911	0.400679	0.449648	0.518654	0.604199	0.69113	0.790302	0.929366	1.10627	1.3177	1.78869	2.5538	3.63071	5.3546
0.0327964	0.0792929	0.112143	0.149414	0.192757	0.212973	0.253612	0.298877	0.339966	0.401391	0.449676	0.518874	0.604585	0.691529	0.7907	0.929366	1.10733	1.31897	1.78877	2.56149	3.63527	5.3546
0.0329671	0.0794883	0.112212	0.149446	0.19279	0.21299	0.25421	0.298901	0.340046	0.401396	0.45004	0.519154	0.604809	0.691617	0.791647	0.929366	1.1093	1.32088	1.7907	2.56665	3.64158	5.36324
0.0330657	0.0795241	0.112223	0.149479	0.193002	0.213177	0.254334	0.299198	0.340046	0.401434	0.450241	0.520109	0.605267	0.691708	0.791758	0.929366	1.1093	1.32161	1.79154	2.56904	3.64584	5.36737
0.0331029	0.0795563	0.112231	0.149636	0.193152	0.213271	0.25449	0.29922	0.340049	0.401468	0.450452	0.520179	0.605307	0.692302	0.792285	0.929627	1.1093	1.32195	1.79255	2.57023	3.65968	5.37912
0.0331256	0.0795678	0.112469	0.149862	0.193202	0.213353	0.254526	0.299292	0.340413	0.401966	0.450513	0.520483	0.605464	0.692511	0.792828	0.93	1.1093	1.32471	1.79354	2.57261	3.66378	5.38616
0.0331421	0.0796216	0.112474	0.149967	0.193241	0.213403	0.254553	0.299415	0.341069	0.402067	0.450605	0.520588	0.606919	0.693088	0.793369	0.930469	1.11055	1.32563	1.80011	2.57756	3.67004	5.39542
0.0331611	0.0796224	0.112571	0.150143	0.193369	0.213486	0.254553	0.299421	0.341179	0.40214	0.450875	0.520681	0.606997	0.69353	0.793918	0.930469	1.11063	1.32953	1.8031	2.57939	3.68343	5.3973
0.033257	0.0797933	0.112576	0.150243	0.193551	0.213588	0.254628	0.299633	0.341298	0.402697	0.451098	0.520895	0.608349	0.69353	0.794426	0.930469	1.11116	1.33065	1.80359	2.58421	3.70095	5.40665
0.0333191	0.0798789	0.112585	0.150353	0.193571	0.213611	0.25481	0.299683	0.341768	0.403046	0.451216	0.520906	0.608601	0.69353	0.794646	0.930469	1.11253	1.33234	1.80421	2.58891	3.70201	5.41063
0.0333349	0.0799011	0.1127	0.150572	0.193739	0.213634	0.254901	0.299805	0.341868	0.403411	0.451223	0.52105	0.608622	0.69353	0.795029	0.930469	1.11259	1.33317	1.80556	2.58912	3.70368	5.43476
0.0334342	0.079999	0.112901	0.15072	0.193874	0.213708	0.255111	0.299839	0.342259	0.404275	0.451355	0.521178	0.608909	0.693918	0.795429	0.930469	1.11271	1.33546	1.807	2.58969	3.70743	5.48484
0.0334536	0.0800775	0.112958	0.150872	0.193945	0.214161	0.255345	0.299875	0.342368	0.404714	0.451497	0.521484	0.609179	0.693928	0.795572	0.930469	1.11477	1.33577	1.80851	2.59318	3.72	5.50753
0.033524	0.0803627	0.112985	0.150922	0.193947	0.214254	0.255422	0.300021	0.342433	0.404869	0.451579	0.522206	0.609373	0.694596	0.795635	0.930469	1.11511	1.33577	1.80851	2.59779	3.7207	5.53082
0.0335358	0.0803953	0.113176	0.151033	0.194095	0.214332	0.255641	0.300022	0.342623	0.405081	0.451639	0.522373	0.60944	0.69465	0.79749	0.930469	1.11563	1.33577	1.80851	2.59898	3.7207	5.54299
0.0335671	0.0804181	0.113371	0.151035	0.194202	0.21445	0.255955	0.300283	0.342803	0.405558	0.45171	0.522406	0.609454	0.695387	0.798401	0.930652	1.11704	1.33577	1.80851	2.60224	3.7207	5.54783
0.0337419	0.0804493	0.113528	0.15112	0.194243	0.214462	0.256122	0.300478	0.342847	0.406129	0.451754	0.522542	0.609547	0.695428	0.798667	0.930838	1.1175	1.33577	1.80851	2.61117	3.7207	5.54917
0.0337582	0.0806581	0.113838	0.151299	0.194334	0.214588	0.256154	0.300904	0.342872	0.406337	0.451923	0.522576	0.609718	0.695518	0.799143	0.93117	1.11792	1.33577	1.81018	2.61232	3.7207	5.55017
0.0337638	0.080699	0.11394	0.151302	0.194358	0.214909	0.256302	0.300959	0.343505	0.407432	0.452383	0.522626	0.609781	0.696005	0.799496	0.934047	1.11828	1.33674	1.81608	2.61997	3.7207	5.61739
0.0338844	0.0807056	0.113957	0.151354	0.194458	0.215067	0.256357	0.301098	0.343542	0.40745	0.452389	0.524171	0.610049	0.696406	0.800101	0.934474	1.11828	1.33675	1.81705	2.62286	3.7207	5.62063
0.0339341	0.0808249	0.11405	0.151386	0.194621	0.215102	0.256359	0.301463	0.343612	0.4079	0.452418	0.524217	0.61012	0.697154	0.800786	0.937561	1.11851	1.33735	1.82104	2.62659	3.7207	5.63831
0.0339453	0.080976	0.114105	0.151808	0.194644	0.215198	0.256914	0.301463	0.34393	0.407952	0.452772	0.524307	0.610137	0.697288	0.800952	0.937732	1.1191	1.3374	1.82319	2.63747	3.72896	5.64858
0.0339505	0.0809832	0.11411	0.15182	0.194674	0.215556	0.256995	0.301556	0.344368	0.408428	0.452929	0.524667	0.610241	0.69761	0.80286	0.937756	1.1191	1.3377	1.82499	2.63787	3.73303	5.67413
0.0340532	0.0809865	0.114218	0.152176	0.19476	0.215897	0.257111	0.301692	0.344493	0.408467	0.453208	0.524747	0.610333	0.697765	0.803006	0.93806	1.1191	1.33875	1.82606	2.64627	3.73931	5.68257
0.0340751	0.0809925	0.114335	0.152177	0.195091	0.215905	0.25715	0.30182	0.344911	0.408559	0.453306	0.525317	0.610336	0.697832	0.804229	0.940718	1.1191	1.34038	1.8297	2.64763	3.75293	5.72812
0.0340837	0.080999	0.114365	0.152212	0.195126	0.215929	0.257418	0.301843	0.345091	0.40871	0.453495	0.525327	0.61093	0.698223	0.804647	0.940755	1.11933	1.34192	1.83129	2.6499	3.75392	5.73287
0.0341186	0.0809992	0.114482	0.15223	0.195181	0.216069	0.257443	0.302289	0.345215	0.409097	0.453789	0.525633	0.611224	0.698379	0.805804	0.941195	1.11938	1.34304	1.83887	2.65409	3.77173	5.73834
0.0341211	0.0811905	0.114494	0.152264	0.195275	0.216087	0.257585	0.302431	0.345594	0.409263	0.453865	0.525689	0.611236	0.698703	0.80601	0.941609	1.12035	1.34496	1.83987	2.65631	3.79439	5.74526
0.0341327	0.0813512	0.114531	0.15235	0.195335	0.21647	0.257673	0.303125	0.345594	0.409287	0.454307	0.52594	0.611417	0.698746	0.806212	0.942042	1.12045	1.34701	1.84012	2.65871	3.80278	5.76016
0.0342181	0.0813702	0.114702	0.152535	0.195482	0.216548	0.257854	0.303187	0.345681	0.409663	0.454474	0.525998	0.611582	0.699211	0.806456	0.942284	1.1213	1.34763	1.84066	2.66129	3.84905	5.76852
0.0344269	0.0814818	0.114713	0.152538	0.195579	0.216574	0.257867	0.30328	0.346341	0.409856	0.454845	0.52612	0.612484	0.699873	0.807257	0.942297	1.12294	1.34806	1.8456	2.66338	3.85299	5.78844
0.0345629	0.0815738	0.114934	0.152556	0.19571	0.216655	0.258002	0.303782	0.346446	0.409921	0.454979	0.527014	0.612893	0.700692	0.807555	0.942975	1.12393	1.34834	1.84693	2.66547	3.85538	5.80156
0.0346034	0.0815936	0.114952	0.152793	0.195969	0.21707	0.258008	0.305033	0.346523	0.409973	0.455266	0.527024	0.613814	0.700893	0.808301	0.943399	1.12432	1.34834	1.84695	2.6681	3.87014	5.80261
0.034639	0.0816162	0.114959	0.152806	0.196135	0.217281	0.258199	0.30511	0.34664	0.410151	0.455512	0.527117	0.614313	0.701532	0.809846	0.943652	1.12478	1.34878	1.84805	2.66898	3.87964	5.8092
0.0346525	0.0816489	0.115038	0.152823	0.196331	0.217324	0.258232	0.305478	0.347078	0.4103	0.455784	0.527524	0.614845	0.701583	0.810234	0.944086	1.12578	1.35006	1.84932	2.67017	3.88272	5.83183
0.0346857	0.0816546	0.115135	0.152924	0.196403	0.217803	0.25831	0.30553	0.347091	0.411606	0.455847	0.527717	0.615955	0.701583	0.811603	0.944229	1.12819	1.35028	1.85113	2.67155	3.8904	5.84231
0.0348086	0.0817532	0.115222	0.153255	0.196467	0.21782	0.259695	0.305739	0.347229	0.411679	0.456051	0.527809	0.61608	0.701772	0.811822	0.944861	1.1287	1.35158	1.85357	2.67155	3.89561	5.85054
0.0349042	0.0817584	0.115249	0.153322	0.196548	0.217933	0.25971	0.305776	0.347613	0.411795	0.456931	0.527902	0.617308	0.701804	0.813659	0.944895	1.12939	1.35282	1.86069	2.67618	3.90794	5.88556
0.0349077	0.0817826	0.115475	0.153421	0.196597	0.218044	0.259962	0.305867	0.34855	0.411816	0.457652	0.527971	0.617361	0.70189	0.81384	0.944917	1.13004	1.3538	1.86088	2.67702	3.92197	5.95661
0.0349487	0.0818191	0.115496	0.153495	0.196605	0.218046	0.26008	0.306095	0.348577	0.412009	0.458047	0.528029	0.617637	0.701955	0.813951	0.945221	1.13133	1.3552	1.861	2.68364	3.92197	5.97283
0.0349652	0.0818277	0.115622	0.153496	0.196636	0.218125	0.260147	0.306304	0.348865	0.412226	0.458051	0.528082	0.617658	0.702141	0.814578	0.946489	1.13176	1.3558	1.86455	2.68504	3.92197	5.98069
0.0351621	0.0818483	0.115677	0.153623	0.196758	0.218378	0.260551	0.306407	0.348891	0.412581	0.45823	0.528772	0.618647	0.702984	0.815493	0.94756	1.13232	1.35939	1.86532	2.68515	3.96458	6.01357
0.035244	0.0819029	0.115751	0.153794	0.196796	0.218488	0.260986	0.306459	0.349312	0.412648	0.458268	0.529104	0.618912	0.703512	0.81561	0.947745	1.13249	1.35969	1.86805	2.68527	3.96875	6.02398
0.0352652	0.0820076	0.116067	0.153894	0.196986	0.218639	0.261033	0.306489	0.349356	0.412932	0.45828	0.529112	0.619102	0.703521	0.81692	0.947991	1.13274	1.36021	1.86952	2.68876	3.98369	6.06529
0.0352796	0.0820435	0.116094	0.154116	0.197034	0.21871	0.261464	0.306539	0.350237	0.414268	0.458855	0.52954	0.619117	0.703978	0.817358	0.951699	1.13279	1.36048	1.87031	2.69593	4.00048	6.07331
0.0353295	0.0820563	0.116271	0.154174	0.197344	0.218724	0.261503	0.306828	0.350509	0.414294	0.459196	0.52986	0.619129	0.704358	0.81793	0.952464	1.13325	1.36213	1.872	2.70637	4.03655	6.13945
0.0354943	0.0821303	0.11635	0.154181	0.197933	0.218763	0.261822	0.306851	0.350791	0.414961	0.459441	0.530534	0.619768	0.704362	0.818159	0.953241	1.13408	1.36347	1.87613	2.70822	4.03841	6.14539
0.0356703	0.0822117	0.116375	0.1542	0.197957	0.218785	0.262065	0.306924	0.350791	0.415221	0.459775	0.530761	0.619787	0.705293	0.818408	0.954394	1.13551	1.36383	1.87647	2.7106	4.05221	6.18539
0.0357663	0.0822421	0.116432	0.154446	0.19812	0.218905	0.262102	0.306948	0.350791	0.415592	0.460443	0.530778	0.620312	0.705303	0.818859	0.955608	1.13685	1.3655	1.88147	2.72803	4.05883	6.18631
0.035799	0.0824585	0.116493	0.154463	0.198543	0.218931	0.262201	0.307102	0.350791	0.415625	0.460636	0.530785	0.620312	0.706066	0.819101	0.957894	1.13752	1.36575	1.88191	2.73496	4.07698	6.26534
0.0359687	0.0824849	0.116522	0.154562	0.19855	0.218933	0.262304	0.307118	0.35088	0.415625	0.4607	0.530864	0.620312	0.706332	0.820679	0.958109	1.13815	1.36624	1.88198	2.73569	4.07858	6.28005
0.0359995	0.0825355	0.116565	0.154781	0.198694	0.219302	0.262342	0.307328	0.350902	0.415625	0.461681	0.531143	0.620312	0.707692	0.821144	0.958428	1.13885	1.3664	1.88852	2.73977	4.10294	6.38023
0.0360261	0.0825406	0.116608	0.154808	0.19879	0.219428	0.262427	0.307567	0.351161	0.415625	0.462036	0.531144	0.620312	0.708313	0.821244	0.958626	1.13976	1.36957	1.88882	2.73977	4.15802	6.44504
0.0360381	0.0825466	0.116705	0.154866	0.198792	0.219523	0.262981	0.308067	0.352016	0.415625	0.463145	0.531147	0.620312	0.708503	0.821354	0.958743	1.1425	1.36981	1.89358	2.74533	4.15802	6.46407
0.0360405	0.0825785	0.116742	0.154918	0.19895	0.219737	0.263137	0.30825	0.352207	0.415625	0.463348	0.53142	0.620312	0.709208	0.821464	0.960572	1.14299	1.36993	1.89623	2.74678	4.15802	6.51739
0.0360522	0.0828243	0.116887	0.154933	0.199031	0.219954	0.263259	0.308411	0.352456	0.415625	0.463356	0.531433	0.620312	0.710244	0.821567	0.961885	1.14377	1.37312	1.90512	2.7505	4.15802	6.54341
0.0361498	0.0829665	0.117096	0.154963	0.199116	0.220012	0.263364	0.30859	0.352981	0.415625	0.463522	0.531572	0.620312	0.710538	0.822638	0.962022	1.14519	1.37333	1.90532	2.76039	4.15802	6.56994
0.0362202	0.0829849	0.11716	0.155054	0.199308	0.220479	0.263424	0.308811	0.353164	0.415625	0.463945	0.531639	0.620312	0.710876	0.823218	0.962262	1.14615	1.37388	1.90728	2.76062	4.16215	6.62112
0.0362299	0.0832476	0.117176	0.155064	0.199514	0.221043	0.263513	0.308949	0.353484	0.415625	0.464027	0.531946	0.620313	0.710894	0.82338	0.962422	1.14641	1.37421	1.90884	2.7702	4.16506	6.69887
0.0363002	0.0833339	0.11718	0.15507	0.199596	0.221149	0.26395	0.30923	0.353486	0.415625	0.464094	0.532718	0.620313	0.711694	0.823772	0.962481	1.14684	1.3768	1.90884	2.77269	4.17363	6.72677
0.036337	0.0833659	0.117203	0.155071	0.199799	0.221416	0.264887	0.309352	0.353509	0.415625	0.464472	0.533207	0.620313	0.711948	0.824168	0.963809	1.1476	1.38013	1.91742	2.77325	4.18217	6.81113
0.036501	0.0833826	0.117343	0.155105	0.199801	0.221438	0.265025	0.309485	0.353771	0.415625	0.464683	0.533281	0.620313	0.712461	0.824422	0.964887	1.14811	1.38047	1.92066	2.77325	4.18791	6.87257
0.0365289	0.0834161	0.117497	0.155199	0.199985	0.221588	0.265127	0.30964	0.354072	0.415625	0.464683	0.533384	0.620313	0.713019	0.824699	0.965068	1.14834	1.3808	1.92208	2.78058	4.23432	6.87477
0.0365415	0.0834807	0.117666	0.155243	0.20014	0.221651	0.265165	0.30979	0.354202	0.415625	0.464683	0.533597	0.620642	0.71352	0.824789	0.96884	1.14926	1.38125	1.9226	2.78668	4.23509	6.88358
0.0365871	0.0835389	0.117675	0.155398	0.200189	0.221765	0.265693	0.309931	0.354205	0.415625	0.464683	0.534695	0.622529	0.714125	0.824839	0.969104	1.14966	1.38156	1.92538	2.78941	4.23814	7.02203
0.0366579	0.0835503	0.117903	0.155555	0.200191	0.221815	0.266328	0.310034	0.354466	0.415625	0.464683	0.535586	0.622671	0.714633	0.825149	0.969456	1.14987	1.38198	1.92667	2.79226	4.24509	7.05518
0.0366736	0.0835614	0.117957	0.155609	0.200203	0.222023	0.2664	0.31015	0.354519	0.415625	0.464683	0.535701	0.622689	0.714676	0.825173	0.969855	1.15026	1.38223	1.93064	2.79364	4.25133	7.08625
0.0367463	0.0836166	0.117985	0.155767	0.200226	0.222111	0.266576	0.310156	0.354553	0.415625	0.464683	0.535903	0.622964	0.715487	0.825235	0.970234	1.15055	1.38777	1.9336	2.79376	4.27003	7.0889
0.0367941	0.0836297	0.118021	0.155835	0.200326	0.222277	0.266694	0.310156	0.354996	0.415625	0.464683	0.535908	0.623184	0.715542	0.825771	0.970364	1.15123	1.38843	1.93364	2.79393	4.27255	7.17987
0.0368082	0.0837372	0.118102	0.155985	0.200443	0.222332	0.266868	0.310156	0.355129	0.415625	0.464683	0.53603	0.623437	0.715596	0.826639	0.971711	1.15209	1.38884	1.93731	2.81161	4.30171	7.25168
0.0368201	0.0837372	0.11829	0.156167	0.20051	0.222638	0.266895	0.310156	0.355261	0.415625	0.464683	0.536093	0.623437	0.716594	0.826779	0.971777	1.15353	1.39714	1.93731	2.8181	4.30521	7.27098
0.0368435	0.0837528	0.118294	0.156202	0.200528	0.2229	0.266973	0.310156	0.355328	0.415625	0.464683	0.536812	0.623437	0.716889	0.826908	0.971956	1.15394	1.39777	1.93903	2.82239	4.3453	7.27631
0.0369092	0.0837805	0.118329	0.156209	0.200631	0.222955	0.267206	0.310156	0.355759	0.415625	0.464683	0.537556	0.623437	0.717345	0.827232	0.972995	1.15445	1.39837	1.93959	2.82817	4.36281	7.3033
0.0369234	0.0839043	0.118519	0.156308	0.201342	0.223151	0.267236	0.310156	0.356047	0.415625	0.464683	0.537818	0.623437	0.717448	0.827383	0.973456	1.15465	1.39888	1.93964	2.82869	4.3771	7.44146
0.0369783	0.0839272	0.118598	0.156463	0.201499	0.223258	0.267344	0.310156	0.357356	0.415625	0.464683	0.538032	0.623437	0.717714	0.827679	0.973824	1.15597	1.39901	1.94102	2.83586	4.38877	7.45555
0.0370631	0.0839647	0.118601	0.156474	0.201501	0.223345	0.267346	0.310156	0.357524	0.415625	0.464683	0.538064	0.623437	0.71773	0.828147	0.974141	1.15679	1.40722	1.9448	2.83642	4.38951	7.54405
0.0370631	0.0840118	0.118605	0.156503	0.202036	0.223346	0.267459	0.310156	0.357568	0.415625	0.464819	0.538826	0.623438	0.719053	0.828417	0.974564	1.15743	1.40725	1.94659	2.84009	4.39337	7.57067
0.0370676	0.0840294	0.11864	0.156522	0.202239	0.223363	0.267512	0.310156	0.35765	0.415625	0.465064	0.538841	0.623438	0.72141	0.830057	0.975767	1.15764	1.40898	1.95123	2.84056	4.39494	7.59454
0.0371746	0.0840853	0.118963	0.15665	0.202332	0.223377	0.267661	0.310156	0.35789	0.415625	0.465352	0.539258	0.623438	0.721922	0.83093	0.9763	1.15872	1.4099	1.95166	2.85373	4.3954	7.72886
0.037207	0.084104	0.119122	0.157079	0.202577	0.223384	0.267699	0.310156	0.358042	0.415625	0.465503	0.539365	0.623438	0.723149	0.83125	0.976629	1.16041	1.4103	1.95201	2.8583	4.3954	7.75301
0.0372898	0.0841844	0.119148	0.157189	0.202894	0.223742	0.267771	0.310156	0.358182	0.415625	0.465592	0.539566	0.623438	0.723289	0.83125	0.977661	1.16136	1.41054	1.95322	2.86297	4.3954	7.77555
0.0373558	0.0842086	0.119239	0.157345	0.202958	0.22381	0.267875	0.310156	0.358263	0.415625	0.466558	0.539766	0.623438	0.723693	0.83125	0.978294	1.16214	1.4142	1.95342	2.86302	4.3954	7.82933
0.03751	0.0842456	0.119271	0.157407	0.203208	0.223883	0.267929	0.310156	0.35832	0.415625	0.466693	0.53999	0.623438	0.72406	0.83125	0.978297	1.16306	1.41866	1.95551	2.87134	4.41788	7.98047
0.0376192	0.0842887	0.119284	0.157408	0.203212	0.224014	0.268043	0.310156	0.358426	0.415625	0.467256	0.540038	0.623438	0.724301	0.83125	0.979378	1.16311	1.41944	1.95935	2.8721	4.4235	8.02781
0.0376921	0.0843162	0.119385	0.157445	0.203366	0.224088	0.268185	0.310156	0.358434	0.415625	0.467734	0.540064	0.623438	0.724453	0.832214	0.97992	1.16489	1.42175	1.96208	2.87554	4.43293	8.03381
0.0377508	0.0844154	0.119474	0.157448	0.203472	0.224095	0.268426	0.310156	0.358455	0.415625	0.468101	0.540211	0.623438	0.7245	0.832322	0.98007	1.16498	1.42292	1.96275	2.87574	4.4381	8.09581
0.0377936	0.0844594	0.119477	0.157618	0.203495	0.22418	0.26861	0.310156	0.358807	0.415625	0.46843	0.540287	0.623438	0.725104	0.832727	0.9808	1.16569	1.42371	1.96777	2.87637	4.47173	8.11318
0.0378391	0.0844668	0.119538	0.158034	0.203602	0.224331	0.268612	0.310156	0.359093	0.415625	0.468852	0.540295	0.623438	0.725127	0.832967	0.980819	1.16587	1.42449	1.96911	2.88103	4.47245	8.12951
0.0379336	0.0845841	0.11979	0.158054	0.20376	0.224369	0.268637	0.310156	0.359194	0.415625	0.469206	0.541174	0.623438	0.725332	0.837377	0.981084	1.16602	1.42491	1.97453	2.88368	4.48445	8.2188
0.0379676	0.0846534	0.119825	0.158278	0.203783	0.224435	0.268663	0.310156	0.359814	0.415625	0.47003	0.54156	0.623438	0.726479	0.837637	0.981868	1.16647	1.42694	1.97521	2.90466	4.49628	8.23487
0.0380047	0.0847035	0.120012	0.158337	0.203832	0.224494	0.268828	0.310156	0.359899	0.415625	0.470082	0.541568	0.623438	0.72691	0.838352	0.982679	1.16658	1.42947	1.97687	2.90763	4.50193	8.27001
0.0381485	0.0847472	0.120114	0.158411	0.203975	0.224544	0.26904	0.310156	0.360123	0.415625	0.470428	0.541602	0.624123	0.727844	0.838357	0.982683	1.1668	1.4301	1.98112	2.90881	4.50281	8.27897
0.03817	0.0848003	0.120176	0.158444	0.204063	0.224611	0.269049	0.310156	0.360278	0.415625	0.470933	0.541906	0.624131	0.728078	0.838455	0.982721	1.16737	1.43062	1.98124	2.91668	4.51736	8.38295
0.0382065	0.0848353	0.120273	0.158472	0.204087	0.224794	0.26934	0.310156	0.360446	0.415625	0.470959	0.542049	0.624812	0.728129	0.838672	0.983037	1.16766	1.43273	1.9843	2.92067	4.56251	8.61489
0.0382163	0.0850698	0.120273	0.158648	0.204158	0.224804	0.269347	0.310156	0.360814	0.415625	0.471071	0.542153	0.624937	0.728159	0.839154	0.984159	1.16814	1.43352	1.98438	2.92312	4.5652	8.63213
0.0383046	0.0851348	0.120356	0.158883	0.204181	0.2249	0.26937	0.310156	0.361253	0.415625	0.471126	0.542173	0.625236	0.728487	0.83917	0.984437	1.16905	1.4365	1.98438	2.92494	4.6339	8.76498
0.0383521	0.0852203	0.120368	0.158933	0.204214	0.225018	0.269758	0.310156	0.361473	0.415625	0.471658	0.542466	0.626371	0.728605	0.839528	0.984825	1.16963	1.43823	1.98438	2.92608	4.6339	8.76976
0.0384116	0.0852394	0.120494	0.159029	0.204511	0.22502	0.26995	0.310156	0.361485	0.415625	0.471778	0.542621	0.626576	0.728739	0.839705	0.985132	1.16973	1.43892	1.98597	2.92624	4.65114	8.81452
0.0384842	0.0852952	0.120495	0.159084	0.204555	0.225109	0.270148	0.310156	0.362747	0.415625	0.471931	0.542847	0.626722	0.728789	0.839886	0.985231	1.17087	1.4391	1.98597	2.92722	4.6574	8.88786
0.0385016	0.0854977	0.120629	0.15916	0.204567	0.225201	0.270227	0.310156	0.362893	0.415769	0.472664	0.543532	0.627067	0.729121	0.840014	0.98587	1.1712	1.43974	1.98597	2.92918	4.67349	8.91881
0.0385628	0.0855134	0.120736	0.15929	0.204589	0.225324	0.270461	0.310156	0.362932	0.416155	0.473099	0.543796	0.627234	0.729489	0.840042	0.986038	1.17139	1.44064	1.99035	2.93589	4.71029	9.02411
0.0386229	0.0856098	0.12075	0.159358	0.204592	0.225351	0.2705	0.310156	0.362978	0.416214	0.473462	0.544135	0.627388	0.729923	0.841868	0.987174	1.17145	1.44338	1.994	2.95623	4.73099	9.0922
0.0386269	0.0856222	0.120825	0.159404	0.204626	0.225522	0.27098	0.310156	0.363151	0.416271	0.473676	0.545114	0.627831	0.731269	0.841907	0.987947	1.17185	1.4436	1.99955	2.95863	4.73294	9.10072
0.0386348	0.0856399	0.121084	0.159444	0.204642	0.22576	0.270994	0.310156	0.363248	0.416501	0.47372	0.545186	0.628388	0.731418	0.842066	0.988361	1.17312	1.44386	1.99982	2.96156	4.73744	9.20071
0.0386478	0.0856952	0.121089	0.159749	0.204796	0.225809	0.271128	0.310156	0.363496	0.416779	0.473762	0.545678	0.628479	0.731548	0.8427	0.98909	1.17462	1.44483	1.99982	2.96719	4.75833	9.25253
0.038667	0.0857359	0.12134	0.159902	0.204815	0.225908	0.271381	0.310156	0.363503	0.417173	0.474019	0.546345	0.628793	0.731572	0.844162	0.990415	1.17481	1.44501	2.00061	2.97543	4.76717	9.31363
0.0388073	0.0857885	0.121386	0.159936	0.204907	0.22598	0.271397	0.310156	0.363698	0.417305	0.474051	0.546432	0.628859	0.732299	0.844288	0.991311	1.17489	1.44635	2.00235	2.97674	4.76882	9.33223
0.0388724	0.0859584	0.121439	0.160043	0.205277	0.226044	0.271498	0.310156	0.363742	0.41753	0.474848	0.546799	0.628862	0.732491	0.844608	0.991376	1.17509	1.44635	2.00279	2.97788	4.77772	12.7545
0.038924	0.0859908	0.121495	0.160058	0.205511	0.226166	0.271537	0.310156	0.364282	0.417585	0.474892	0.546856	0.629831	0.732927	0.844844	0.992188	1.1754	1.44839	2.00483	2.9824	4.7907	12.7545
0.0389244	0.0860941	0.12177	0.160278	0.205601	0.226259	0.271656	0.310156	0.364305	0.417615	0.47562	0.548089	0.63039	0.733166	0.846055	0.992188	1.17557	1.44924	2.0067	2.98688	4.81093	12.9959
0.0389856	0.0861063	0.121856	0.160308	0.205604	0.226469	0.271696	0.310156	0.364371	0.417657	0.476551	0.549287	0.632211	0.733702	0.846091	0.992188	1.17557	1.45125	2.01294	2.98688	4.8413	13.0549
0.0390106	0.08612	0.122048	0.160322	0.20573	0.22664	0.27172	0.310156	0.36483	0.417729	0.476677	0.549629	0.632369	0.734239	0.846401	0.992231	1.17557	1.45393	2.01494	2.98877	4.84511	13.2049
0.0391467	0.08612	0.122312	0.160342	0.205736	0.226808	0.271775	0.310156	0.364948	0.417989	0.47687	0.549726	0.632568	0.735334	0.847028	0.993638	1.17596	1.45469	2.01514	2.98949	4.84521	13.4244
0.0391584	0.0862415	0.122362	0.160401	0.205963	0.226922	0.27201	0.310156	0.365092	0.418025	0.477188	0.549869	0.632858	0.736218	0.847036	0.993898	1.17661	1.45644	2.01881	3.00604	4.85483	13.4518
0.0392127	0.0862841	0.122538	0.160482	0.205987	0.227167	0.272176	0.310156	0.365516	0.418138	0.478585	0.549933	0.633447	0.736576	0.847121	0.994885	1.17782	1.45673	2.02094	3.01925	4.87335	13.4792
0.0392138	0.0863	0.122673	0.16054	0.205991	0.22722	0.272333	0.310156	0.365634	0.419135	0.478722	0.550098	0.634788	0.7373	0.848337	0.995888	1.17819	1.45939	2.0228	3.01972	4.87335	13.7213
0.0392373	0.0863023	0.122696	0.160632	0.206004	0.227246	0.272366	0.310156	0.366141	0.42119	0.47888	0.550241	0.635149	0.737404	0.849455	0.996804	1.17825	1.46162	2.02491	3.01984	4.87335	13.8662
0.0392558	0.0863506	0.122723	0.160718	0.206007	0.22727	0.272539	0.310156	0.366202	0.421652	0.478882	0.550463	0.636257	0.737882	0.849894	0.997069	1.17921	1.46238	2.03201	3.02355	4.87335	13.9701
0.0393217	0.0863648	0.12293	0.160736	0.206138	0.227485	0.272575	0.310156	0.366414	0.4218	0.479777	0.550768	0.636826	0.73796	0.849985	0.997177	1.17934	1.4648	2.0333	3.02679	4.88854	14.0317
0.0393353	0.0863692	0.12295	0.161122	0.206255	0.227772	0.272777	0.310156	0.366512	0.422076	0.479797	0.551156	0.63733	0.738417	0.850371	0.997563	1.17934	1.46483	2.034	3.02913	4.89819	17.9093
0.0393741	0.0865471	0.123229	0.161221	0.206265	0.227865	0.273364	0.310156	0.366513	0.422833	0.47983	0.551201	0.637549	0.738539	0.851007	0.999565	1.17948	1.46523	2.03411	3.03003	4.91406	17.9093
0.0394435	0.0867005	0.123331	0.161242	0.206305	0.228002	0.273425	0.310156	0.366685	0.422858	0.480307	0.551205	0.637906	0.739313	0.851295	0.999735	1.17963	1.46646	2.03624	3.03703	4.91985	17.9093
0.039503	0.0867796	0.123497	0.161297	0.206689	0.228309	0.273625	0.310156	0.368126	0.422944	0.480592	0.551794	0.638389	0.73999	0.851556	1.00009	1.17991	1.46848	2.03836	3.05558	4.96145	17.9984
0.0395541	0.0868563	0.123533	0.161337	0.206871	0.228324	0.273675	0.310156	0.368182	0.422972	0.481056	0.552203	0.638421	0.740095	0.852431	1.00084	1.18336	1.46924	2.03912	3.05856	4.97258	18.0376
0.0396057	0.0870722	0.123619	0.161461	0.206917	0.228368	0.273948	0.310156	0.368331	0.423082	0.481109	0.552645	0.638476	0.740101	0.852692	1.00242	1.18354	1.46943	2.04065	3.06054	4.97856	18.0938
0.0396613	0.0870935	0.123655	0.16158	0.207003	0.228378	0.274105	0.310156	0.368399	0.423532	0.481279	0.552794	0.63971	0.740146	0.853824	1.00281	1.1842	1.46946	2.04134	3.06455	4.98083	18.2496
0.0397195	0.0870944	0.123661	0.161638	0.207028	0.228719	0.274124	0.310156	0.368491	0.423786	0.481286	0.553234	0.639828	0.740189	0.854386	1.00307	1.18517	1.46958	2.04421	3.06562	4.98568	18.2496
0.0397277	0.0875	0.123765	0.161731	0.207135	0.228869	0.274207	0.310156	0.36852	0.423805	0.481585	0.553794	0.64053	0.740967	0.854474	1.00338	1.18584	1.46973	2.04486	3.06817	4.98617	18.3789
0.0397277	0.0875636	0.123904	0.161803	0.207149	0.229097	0.27424	0.310156	0.36895	0.424121	0.481777	0.553963	0.640769	0.741317	0.854882	1.00427	1.18645	1.46988	2.04644	3.08322	4.99164	18.5107
0.0398038	0.087575	0.123935	0.161975	0.207184	0.229105	0.274515	0.310156	0.368988	0.42435	0.481781	0.554168	0.640894	0.741809	0.855318	1.00435	1.18663	1.47261	2.048	3.08653	4.99873	18.5306
0.0398594	0.0877029	0.124066	0.161985	0.207552	0.229136	0.274686	0.310156	0.369025	0.424686	0.482005	0.554191	0.641521	0.742189	0.855348	1.00538	1.18689	1.47278	2.04834	3.09004	5.00655	18.7501
0.0398767	0.0877599	0.124159	0.162053	0.207676	0.229976	0.274783	0.310156	0.369203	0.424732	0.483284	0.554223	0.641571	0.742552	0.855375	1.00552	1.18697	1.47295	2.05875	3.09244	5.00696	18.9703
0.0399304	0.0878461	0.124317	0.162054	0.207812	0.230192	0.2749	0.310156	0.369279	0.424807	0.483391	0.554254	0.641683	0.742703	0.856532	1.00631	1.18737	1.47431	2.0602	3.09917	5.01057	19.0625
0.0399681	0.0879193	0.124359	0.162056	0.207812	0.230256	0.275138	0.310156	0.369386	0.424977	0.483506	0.554452	0.641773	0.742795	0.856833	1.00697	1.18937	1.47649	2.06407	3.10869	5.01801	19.196
0.0400023	0.0879474	0.124705	0.162096	0.207812	0.230374	0.275469	0.310156	0.369857	0.425275	0.483619	0.554475	0.642191	0.743264	0.856833	1.00745	1.18966	1.47958	2.0655	3.11719	5.0401	19.196
0.0401779	0.0879866	0.125004	0.162248	0.207812	0.230762	0.27574	0.310156	0.370046	0.42546	0.483767	0.55465	0.642205	0.744141	0.856833	1.00754	1.18977	1.4799	2.06599	3.11719	5.04407	19.5249
0.0401844	0.0881243	0.125019	0.162624	0.207812	0.230804	0.275868	0.310156	0.370054	0.425832	0.48386	0.55465	0.642231	0.744141	0.856833	1.00838	1.19107	1.48218	2.07564	3.12155	5.06562	19.5391
0.0402159	0.0881887	0.125068	0.162673	0.207812	0.230994	0.276279	0.310156	0.370229	0.426234	0.484439	0.554669	0.64284	0.744141	0.856833	1.01003	1.19155	1.48508	2.07648	3.12787	5.08092	19.5391
0.0402931	0.0882331	0.125264	0.162726	0.207812	0.231223	0.276488	0.310156	0.370276	0.426316	0.485626	0.554806	0.643535	0.744141	0.856838	1.0118	1.19203	1.48517	2.07767	3.13423	5.09353	19.5391
0.0403376	0.0883975	0.125336	0.162772	0.207812	0.231611	0.276543	0.310156	0.370356	0.426427	0.485916	0.554806	0.643573	0.744141	0.85734	1.0143	1.19471	1.48828	2.07971	3.13512	5.09585	20.3005
0.0403555	0.0886257	0.125614	0.162895	0.207812	0.231671	0.276809	0.310156	0.370682	0.426477	0.486401	0.555518	0.644205	0.744141	0.857551	1.01598	1.19828	1.48832	2.08216	3.13532	5.1085	20.8551
0.0404037	0.0886817	0.125803	0.163032	0.207812	0.231761	0.276874	0.310156	0.371155	0.426642	0.487977	0.556195	0.644294	0.744141	0.857793	1.01622	1.19831	1.49001	2.09416	3.13534	5.11156	21.1888
0.0404303	0.0886914	0.125843	0.163123	0.207812	0.231793	0.277007	0.310299	0.371624	0.42698	0.488	0.557425	0.6452	0.744141	0.85787	1.01625	1.19836	1.49093	2.09518	3.13945	5.11362	21.4098
0.0404334	0.0887157	0.125873	0.163134	0.207812	0.231869	0.277181	0.310668	0.371704	0.427113	0.488726	0.557426	0.645201	0.744141	0.858469	1.01671	1.20095	1.49224	2.09627	3.15534	5.11362	21.523
0.0404553	0.0888442	0.125897	0.163262	0.207812	0.231934	0.277283	0.311469	0.372142	0.427181	0.488849	0.557663	0.64529	0.744141	0.858476	1.01701	1.20498	1.49464	2.09812	3.15598	5.11362
0.0404766	0.0888545	0.125914	0.163281	0.207812	0.231976	0.277345	0.311526	0.372222	0.427221	0.489536	0.557792	0.645487	0.744141	0.858854	1.0173	1.20608	1.49565	2.09861	3.15994	5.1325
0.0406042	0.0888894	0.126096	0.163341	0.207812	0.232017	0.277574	0.31162	0.372346	0.427322	0.489774	0.558293	0.645928	0.744141	0.859838	1.0179	1.2067	1.49811	2.10292	3.16369	5.15814
0.0406169	0.0889988	0.126196	0.163428	0.207812	0.232507	0.277742	0.312353	0.372469	0.42748	0.489962	0.558571	0.646012	0.744141	0.860469	1.01854	1.20887	1.49868	2.10947	3.16495	5.171
0.0406316	0.0890278	0.126228	0.163436	0.207812	0.232564	0.277772	0.312877	0.372603	0.427633	0.490146	0.558589	0.646064	0.744212	0.861279	1.02074	1.20888	1.4993	2.11023	3.16648	5.17213
0.0406497	0.0890361	0.126239	0.163445	0.207812	0.232998	0.277855	0.313654	0.372617	0.427766	0.490209	0.558809	0.646092	0.744708	0.861988	1.02272	1.20932	1.50087	2.11075	3.17923	5.18105
0.0406751	0.0891305	0.126251	0.163503	0.207812	0.233119	0.278034	0.31396	0.373415	0.428212	0.490314	0.558921	0.646121	0.744875	0.863942	1.02453	1.20997	1.5016	2.11249	3.17987	5.18875
0.0407062	0.0891736	0.126346	0.163519	0.207812	0.233194	0.278093	0.314049	0.373748	0.428291	0.490652	0.559415	0.646214	0.745101	0.865398	1.0246	1.21081	1.5027	2.11261	3.18485	5.19477
0.0408043	0.0892363	0.126357	0.16362	0.207812	0.233258	0.278094	0.314349	0.373776	0.428812	0.490738	0.560462	0.646861	0.745423	0.866452	1.02514	1.21142	1.50404	2.11307	3.19018	5.20355
0.0408102	0.0895444	0.126432	0.163754	0.207812	0.233438	0.278183	0.314394	0.373855	0.428978	0.4908	0.561058	0.647231	0.746062	0.866849	1.02646	1.21174	1.50561	2.11489	3.21066	5.2148
0.0408353	0.0895918	0.126445	0.163893	0.207812	0.233689	0.278191	0.314498	0.374599	0.429033	0.490987	0.561308	0.647418	0.746493	0.866999	1.02658	1.21174	1.50777	2.11664	3.21909	5.22489
0.0408818	0.0895944	0.126464	0.163922	0.207812	0.233753	0.278246	0.314574	0.375073	0.429081	0.491123	0.561512	0.647487	0.746677	0.867871	1.02742	1.21174	1.51019	2.11761	3.22461	5.22799
0.0409185	0.0896703	0.12658	0.163928	0.207812	0.233787	0.278305	0.314609	0.375194	0.429242	0.491343	0.561821	0.648613	0.747845	0.868007	1.03141	1.21174	1.51043	2.11931	3.22542	5.22854
0.0409888	0.0897901	0.126714	0.164132	0.207812	0.233873	0.278584	0.314618	0.375207	0.429373	0.491857	0.561824	0.649145	0.748545	0.86817	1.03301	1.21189	1.51304	2.12054	3.23414	5.26977
0.0409889	0.0898507	0.126736	0.164183	0.207812	0.234001	0.278803	0.314659	0.375787	0.429429	0.492048	0.56183	0.64977	0.749279	0.868333	1.0336	1.21252	1.51789	2.12183	3.23414	5.26985
0.0410577	0.090046	0.126741	0.16426	0.207812	0.234151	0.278923	0.314824	0.375794	0.429786	0.492392	0.562725	0.651041	0.749279	0.869183	1.03466	1.21314	1.51797	2.12479	3.23738	5.27065
0.0411104	0.0901229	0.126785	0.164339	0.207812	0.234217	0.27902	0.31492	0.375867	0.429828	0.492426	0.56292	0.651527	0.749279	0.869287	1.03498	1.21367	1.52101	2.12492	3.24454	5.2728
0.0412639	0.090206	0.126788	0.164709	0.207812	0.234417	0.27907	0.314988	0.376345	0.430082	0.492661	0.563515	0.652028	0.749279	0.869579	1.03554	1.21375	1.52699	2.12849	3.24503	5.28585
0.041298	0.0902265	0.126791	0.165008	0.207812	0.234558	0.279112	0.315029	0.376819	0.430235	0.492788	0.563592	0.652512	0.749279	0.86967	1.03636	1.21495	1.53074	2.12938	3.24733	5.295
0.0413363	0.0903137	0.126922	0.165131	0.207812	0.234592	0.279276	0.315166	0.377038	0.430241	0.493025	0.56387	0.652588	0.749279	0.869692	1.03721	1.21496	1.533	2.13378	3.25455	5.33267
0.0413465	0.0905134	0.127039	0.165348	0.207812	0.23482	0.279396	0.315274	0.377134	0.430254	0.493068	0.563991	0.652998	0.749279	0.869782	1.03784	1.21576	1.53372	2.13378	3.25816	5.35124
0.0413809	0.0905226	0.127039	0.16548	0.207812	0.235352	0.279534	0.315359	0.377768	0.43027	0.493376	0.564003	0.653559	0.749279	0.869978	1.03804	1.21621	1.53612	2.13378	3.26255	5.36107
0.041416	0.0905245	0.127043	0.165801	0.207812	0.2356	0.279724	0.315366	0.377854	0.430425	0.493645	0.564549	0.653789	0.749279	0.87016	1.03906	1.21632	1.53703	2.13462	3.26347	5.36601
0.0414357	0.0905391	0.127107	0.165813	0.207812	0.235709	0.279785	0.315524	0.377892	0.43066	0.493694	0.564623	0.653997	0.749442	0.871198	1.03906	1.21667	1.53707	2.13648	3.268	5.36737
0.0415313	0.0905729	0.127266	0.166061	0.207812	0.235806	0.27979	0.31553	0.377986	0.4308	0.493836	0.565355	0.655031	0.749456	0.872811	1.03906	1.2168	1.54513	2.14034	3.27206	5.36957
0.0415399	0.0906108	0.127313	0.166072	0.207812	0.235922	0.279822	0.316161	0.378055	0.431501	0.49465	0.565555	0.655099	0.749665	0.872978	1.03906	1.21792	1.54749	2.14143	3.2858	5.38193
0.0415646	0.0906511	0.127395	0.166089	0.207812	0.236104	0.279938	0.316422	0.37818	0.431555	0.495549	0.56608	0.655103	0.749682	0.873484	1.03906	1.21873	1.54853	2.14232	3.2858	5.38238
0.0417431	0.0906894	0.127436	0.166297	0.207812	0.236205	0.280031	0.316752	0.378256	0.431569	0.495801	0.566874	0.655223	0.750035	0.873876	1.03906	1.2192	1.55078	2.14537	3.29823	5.39334
0.0417679	0.090692	0.127477	0.166425	0.207812	0.23633	0.280343	0.316796	0.3784	0.431782	0.496094	0.566943	0.655231	0.750058	0.875002	1.03906	1.22005	1.55078	2.15062	3.29965	5.399
0.0418483	0.0907629	0.127566	0.166435	0.207812	0.236541	0.280561	0.317127	0.378419	0.432232	0.496094	0.567543	0.655465	0.751083	0.875457	1.03906	1.223	1.55078	2.15215	3.30475	5.41486
0.0418589	0.0907996	0.127692	0.166572	0.207812	0.236716	0.280575	0.317266	0.37848	0.432395	0.496094	0.567695	0.655949	0.751294	0.875835	1.03906	1.2255	1.55078	2.15771	3.30593	5.43215
0.0419265	0.0908039	0.127706	0.166589	0.207812	0.236797	0.281236	0.317467	0.37852	0.432744	0.496094	0.567982	0.655991	0.751495	0.876823	1.03906	1.2256	1.55078	2.16104	3.30751	5.44422
0.0419612	0.0909826	0.128059	0.166749	0.207812	0.236887	0.281278	0.317514	0.378621	0.432913	0.496094	0.568717	0.65603	0.752412	0.877254	1.03906	1.2258	1.55078	2.1642	3.32471	5.44728
0.0419861	0.0910052	0.128178	0.16678	0.207812	0.236909	0.281533	0.317522	0.378626	0.433008	0.496094	0.569288	0.656079	0.75368	0.877254	1.03913	1.22607	1.55078	2.16489	3.32877	5.50254
0.0420271	0.0910217	0.128298	0.166946	0.207812	0.236985	0.281607	0.317633	0.378695	0.433632	0.496094	0.569414	0.656226	0.753824	0.877434	1.0393	1.22858	1.55078	2.1738	3.33006	5.50648
0.0421066	0.0910254	0.128305	0.167077	0.207812	0.237007	0.281764	0.317759	0.379086	0.434383	0.496094	0.569423	0.65626	0.754193	0.878743	1.03991	1.22948	1.55118	2.17589	3.33072	5.50753
0.0421824	0.0910281	0.128557	0.167094	0.207812	0.237132	0.281801	0.317843	0.379351	0.434462	0.496094	0.569889	0.656331	0.754195	0.879268	1.04028	1.22963	1.55164	2.17775	3.33729	5.51512
0.0422015	0.0911168	0.12876	0.167554	0.207812	0.237413	0.281865	0.31821	0.379472	0.43485	0.496094	0.570266	0.656545	0.754345	0.879772	1.0404	1.23038	1.55437	2.18082	3.34054	5.51999
0.0422922	0.0911333	0.1289	0.167576	0.207812	0.237549	0.282138	0.318327	0.379717	0.435626	0.496094	0.570377	0.6567	0.75494	0.88056	1.04084	1.23264	1.55697	2.18317	3.34328	5.53028
0.0422929	0.0911728	0.128956	0.16762	0.207812	0.237592	0.282249	0.318667	0.380221	0.435855	0.496094	0.570477	0.657161	0.754947	0.880608	1.04128	1.23505	1.5585	2.18446	3.35873	5.56085
0.0423954	0.0912909	0.12904	0.168298	0.207812	0.237638	0.282299	0.318805	0.380245	0.436175	0.496094	0.570759	0.657161	0.755184	0.880968	1.0413	1.2362	1.56073	2.18619	3.37638	5.56984
0.0424147	0.0912934	0.129061	0.168369	0.207812	0.237668	0.282366	0.318827	0.380858	0.436572	0.496094	0.572448	0.657161	0.755431	0.881674	1.04179	1.23623	1.5614	2.18816	3.37927	5.58043
0.0424532	0.0913094	0.129169	0.168605	0.207812	0.237752	0.282832	0.318953	0.380899	0.436738	0.496094	0.573066	0.657161	0.755502	0.881973	1.04203	1.24008	1.56232	2.18865	3.38433	5.58691
0.0424771	0.0913393	0.129268	0.168619	0.207812	0.237974	0.283278	0.319089	0.38091	0.436866	0.496094	0.573178	0.657161	0.756032	0.882121	1.04227	1.24023	1.56242	2.18874	3.3856	5.59498
0.042546	0.0914257	0.129273	0.168694	0.207812	0.23798	0.283783	0.319464	0.380953	0.436937	0.496094	0.573238	0.657161	0.756145	0.882359	1.04243	1.24023	1.56288	2.19023	3.38807	5.60458
0.0425634	0.091523	0.129279	0.168801	0.207812	0.23846	0.283828	0.319607	0.381436	0.436951	0.496094	0.573331	0.657161	0.756379	0.882443	1.04247	1.24023	1.56394	2.19314	3.38835	5.61632
0.0425677	0.0915782	0.129405	0.168939	0.207812	0.238683	0.283916	0.319799	0.38145	0.437448	0.496577	0.573359	0.657843	0.756486	0.88247	1.04398	1.24023	1.56511	2.19314	3.40609	5.67535
0.042608	0.0916071	0.129416	0.16897	0.207812	0.238812	0.284024	0.319852	0.381842	0.437522	0.497096	0.573622	0.658262	0.757123	0.882947	1.0441	1.24023	1.56796	2.19314	3.41342	5.67697
0.0426873	0.0916754	0.129467	0.169013	0.207812	0.238837	0.284059	0.319894	0.382044	0.437533	0.497379	0.573623	0.658424	0.757518	0.883635	1.04608	1.24023	1.56838	2.19314	3.41575	5.70915
0.04275	0.0918649	0.130099	0.169037	0.207812	0.238851	0.284071	0.320392	0.382383	0.43774	0.497505	0.573976	0.658561	0.759457	0.884303	1.04666	1.24023	1.56879	2.19314	3.41606	5.82313
0.0427656	0.0919335	0.130103	0.169059	0.207812	0.239193	0.284516	0.320413	0.382551	0.437756	0.4978	0.574086	0.658713	0.759959	0.885929	1.04709	1.24023	1.57086	2.19314	3.42638	5.82588
0.0428127	0.0919866	0.130116	0.169158	0.207812	0.239277	0.284712	0.320602	0.382572	0.438179	0.497961	0.575217	0.658991	0.76009	0.88641	1.04789	1.24023	1.57669	2.19314	3.43596	5.82652
0.0428317	0.0920073	0.130196	0.169301	0.207812	0.239511	0.284768	0.320807	0.383111	0.438627	0.498135	0.575226	0.659858	0.760479	0.886685	1.04798	1.24023	1.57867	2.19353	3.43782	5.83057
0.0428341	0.0920105	0.130398	0.16936	0.207812	0.239758	0.284906	0.320837	0.38351	0.438627	0.498185	0.575293	0.659944	0.760526	0.887759	1.04846	1.24023	1.58149	2.19389	3.43823	5.83331
0.0428819	0.0920124	0.130474	0.169518	0.207812	0.239761	0.285006	0.321698	0.383556	0.438627	0.498735	0.575459	0.660412	0.760901	0.888927	1.04896	1.24023	1.58149	2.19986	3.43943	5.91923
0.0429236	0.0920571	0.130536	0.169553	0.207812	0.239794	0.285207	0.321798	0.383565	0.438627	0.498843	0.575836	0.660678	0.761256	0.888988	1.04902	1.24062	1.58149	2.20065	3.43994	5.92766
0.0429338	0.0922105	0.130576	0.169594	0.207812	0.239816	0.285335	0.321857	0.383588	0.438627	0.498875	0.577824	0.66192	0.762103	0.889036	1.04927	1.24062	1.58197	2.20274	3.45095	5.93019
0.0429499	0.0922529	0.130612	0.169625	0.207812	0.239918	0.285369	0.322333	0.383614	0.438627	0.498883	0.579299	0.66193	0.762495	0.889518	1.05098	1.24063	1.58827	2.20597	3.45489	5.94118
0.0429789	0.0922899	0.130673	0.169923	0.207812	0.240189	0.285391	0.322492	0.383637	0.438697	0.498918	0.580238	0.66211	0.762565	0.889787	1.05124	1.24063	1.58827	2.20617	3.45969	5.98738
0.0430077	0.0923456	0.130684	0.17005	0.207812	0.240222	0.285573	0.32255	0.383651	0.438989	0.499045	0.580339	0.662306	0.763452	0.89074	1.05147	1.24063	1.58834	2.20713	3.45971	6.0257
0.0430963	0.0923653	0.130714	0.170345	0.207812	0.240404	0.28586	0.322664	0.38461	0.439176	0.499978	0.580457	0.662541	0.763562	0.892441	1.05237	1.24063	1.59641	2.20966	3.4613	6.06079
0.0430976	0.0923988	0.130804	0.170358	0.207812	0.240485	0.285921	0.322726	0.384621	0.440158	0.500212	0.580749	0.663191	0.763991	0.893013	1.05237	1.24063	1.59664	2.21129	3.46211	6.14832
0.0432053	0.0924445	0.130975	0.170488	0.207812	0.240553	0.286129	0.322773	0.384779	0.440324	0.500345	0.58086	0.663811	0.764661	0.894028	1.05284	1.241	1.60057	2.21136	3.46975	6.22779
0.0432493	0.0926292	0.130982	0.170514	0.207812	0.240772	0.286308	0.322898	0.384787	0.441204	0.500778	0.581023	0.663925	0.765098	0.894346	1.05334	1.24287	1.601	2.21693	3.4725	6.29628
0.0432559	0.0926942	0.131189	0.170642	0.207812	0.240855	0.286367	0.32336	0.384821	0.441233	0.501066	0.581454	0.664294	0.765115	0.894346	1.05376	1.24292	1.60171	2.2186	3.4815	6.30623
0.0432712	0.0927395	0.131213	0.170693	0.207812	0.24092	0.286637	0.323368	0.384991	0.441594	0.501254	0.581588	0.664333	0.765132	0.894346	1.05768	1.24327	1.60266	2.2186	3.4815	6.36869
0.0433054	0.0927703	0.131229	0.170943	0.207812	0.24102	0.286793	0.323656	0.3851	0.441598	0.501393	0.581883	0.664605	0.76572	0.894346	1.05782	1.2469	1.60467	2.2186	3.48433	6.39464
0.0433146	0.0927795	0.131252	0.171046	0.207812	0.241149	0.286838	0.323686	0.385469	0.441664	0.501627	0.582215	0.66476	0.765872	0.894346	1.05893	1.24716	1.6047	2.21881	3.52838	6.41505
0.0433519	0.0928162	0.131308	0.171165	0.207812	0.24127	0.286883	0.323737	0.385581	0.441713	0.501938	0.582254	0.665015	0.76616	0.895776	1.05897	1.24942	1.60519	2.22391	3.52985	6.44212
0.0433582	0.0928698	0.131336	0.171328	0.207812	0.241474	0.286912	0.32392	0.386024	0.441987	0.502169	0.582431	0.66504	0.766182	0.895878	1.05907	1.25003	1.60812	2.226	3.54256	6.46368
0.0434057	0.0929487	0.131484	0.171577	0.207812	0.24149	0.28694	0.32433	0.386091	0.442217	0.502794	0.582855	0.665367	0.766335	0.896336	1.05945	1.25157	1.60937	2.22711	3.55769	6.48536
0.0434455	0.092952	0.131631	0.171641	0.207812	0.2417	0.287004	0.324535	0.386395	0.443065	0.503414	0.58304	0.665903	0.766613	0.897081	1.05964	1.2516	1.61301	2.2285	3.56457	6.52509
0.043518	0.0929711	0.131729	0.1718	0.207812	0.242062	0.287091	0.32457	0.386525	0.443251	0.504336	0.583439	0.665947	0.766645	0.897111	1.05964	1.2523	1.61515	2.23242	3.59787	6.54304
0.0435739	0.0930087	0.131847	0.171886	0.207812	0.242521	0.287104	0.324645	0.386587	0.443368	0.504361	0.583625	0.666046	0.766694	0.898157	1.05964	1.25231	1.61702	2.23897	3.61947	6.60176
0.0435794	0.0930469	0.131987	0.171933	0.207812	0.242676	0.287119	0.324937	0.386973	0.444068	0.504373	0.583804	0.666678	0.766874	0.898505	1.05964	1.255	1.61845	2.23989	3.62068	6.62813
0.0435965	0.0930722	0.132089	0.172101	0.207812	0.242793	0.287344	0.324989	0.387194	0.44439	0.504543	0.584009	0.666815	0.766994	0.899587	1.05964	1.25577	1.61929	2.24384	3.63036	6.62942
0.0435993	0.0931717	0.132236	0.172119	0.207812	0.242828	0.287661	0.325315	0.387201	0.444539	0.504723	0.584026	0.666994	0.768692	0.900022	1.05964	1.25863	1.6201	2.24389	3.63527	6.77495
0.0436393	0.093215	0.132512	0.172141	0.207812	0.243048	0.287976	0.325327	0.387253	0.444907	0.504778	0.584412	0.667124	0.768966	0.900379	1.05964	1.2588	1.62191	2.24432	3.6484	6.82258
0.04364	0.0932264	0.13259	0.172221	0.207812	0.243344	0.288055	0.325337	0.387362	0.445284	0.505368	0.584882	0.667209	0.769417	0.900405	1.05964	1.25937	1.62261	2.24773	3.6617	6.88691
0.0437267	0.0932468	0.132598	0.172237	0.207812	0.243558	0.288237	0.325344	0.387455	0.445296	0.505391	0.58648	0.667588	0.769539	0.901185	1.06166	1.25973	1.62287	2.24788	3.66378	6.97191
0.0437346	0.0933266	0.132956	0.172278	0.207812	0.24375	0.288311	0.325375	0.387623	0.445308	0.506047	0.586856	0.667753	0.769688	0.901294	1.06257	1.2598	1.6254	2.25124	3.66634	7.00766
0.0438252	0.0933982	0.132995	0.172389	0.207812	0.243824	0.288518	0.325397	0.387809	0.445343	0.506139	0.587101	0.667768	0.769765	0.901674	1.06402	1.26007	1.63109	2.25358	3.66733	7.01908
0.0438489	0.093415	0.133072	0.172402	0.207812	0.243923	0.288554	0.325551	0.387874	0.445387	0.506283	0.587116	0.667842	0.770168	0.901926	1.06419	1.26043	1.63133	2.25646	3.67526	7.09164
0.0439145	0.0936161	0.133087	0.172561	0.207812	0.244163	0.288711	0.325573	0.388383	0.445544	0.506389	0.587615	0.667845	0.771428	0.902121	1.06551	1.26112	1.6315	2.25808	3.68343	7.18083
0.043954	0.0936314	0.133293	0.172589	0.207812	0.244178	0.288935	0.325681	0.38881	0.445607	0.506583	0.587667	0.668057	0.771616	0.902606	1.06675	1.26163	1.63301	2.26335	3.68748	7.1906
0.0439654	0.0937293	0.133581	0.172628	0.207812	0.244202	0.289162	0.325725	0.388868	0.446011	0.50684	0.58769	0.668062	0.771695	0.902909	1.06717	1.26213	1.63439	2.26378	3.68748	7.22111
0.043967	0.0937336	0.133627	0.17282	0.207812	0.244255	0.289264	0.325895	0.389001	0.446073	0.506848	0.587783	0.668454	0.771887	0.903358	1.06934	1.26302	1.63662	2.26553	3.68748	7.22307
0.0440676	0.093761	0.133762	0.173074	0.207812	0.244379	0.289283	0.326	0.389049	0.446095	0.507005	0.587783	0.668839	0.771938	0.903485	1.06959	1.26311	1.64293	2.26769	3.68748	7.24856
0.0440883	0.0937903	0.133846	0.173142	0.207812	0.244495	0.289414	0.326051	0.389235	0.446149	0.507407	0.587783	0.668903	0.772804	0.904151	1.06981	1.2648	1.64335	2.26782	3.71129	7.28638
0.0441176	0.0939327	0.133865	0.173215	0.207812	0.244538	0.289592	0.326156	0.389482	0.446172	0.507854	0.587783	0.66896	0.772825	0.904533	1.07012	1.2648	1.64863	2.2759	3.72	7.29949
0.0441635	0.093995	0.133937	0.173313	0.207812	0.244646	0.289643	0.326173	0.38996	0.446387	0.507966	0.587783	0.669323	0.773162	0.905455	1.07025	1.2648	1.64968	2.27762	3.7207	7.33666
0.0441872	0.093999	0.134037	0.173349	0.207812	0.244935	0.289685	0.326467	0.390144	0.446676	0.508053	0.587783	0.66975	0.773217	0.907179	1.07139	1.2648	1.65241	2.27856	3.7207	7.45866
0.0442068	0.0940808	0.13405	0.173359	0.207812	0.245264	0.289706	0.327061	0.390339	0.4467	0.508163	0.587783	0.670149	0.773254	0.907922	1.07151	1.2648	1.65328	2.27998	3.7207	7.53712
0.0442849	0.0942218	0.134265	0.173385	0.207812	0.245598	0.289748	0.327087	0.390626	0.446987	0.508255	0.587801	0.670249	0.774067	0.9088	1.07226	1.2648	1.6546	2.27998	3.7207	7.62903
0.0442852	0.0942253	0.134364	0.173406	0.207812	0.245606	0.289751	0.327304	0.390767	0.447349	0.508451	0.588081	0.670316	0.774208	0.9088	1.07381	1.2648	1.6561	2.28083	3.7207	7.67818
0.0445099	0.0942473	0.134367	0.173414	0.207812	0.245859	0.289998	0.327376	0.391075	0.44755	0.509054	0.588914	0.671263	0.774451	0.909221	1.07408	1.2648	1.65688	2.28527	3.7207	7.75301
0.0445582	0.0942594	0.134379	0.173426	0.207812	0.246002	0.290055	0.327611	0.391092	0.448259	0.509103	0.588996	0.671608	0.77461	0.909434	1.07411	1.2674	1.657	2.28575	3.7207	7.77297
0.044596	0.0943295	0.134444	0.173477	0.207812	0.246023	0.290447	0.327891	0.391199	0.448341	0.510272	0.589118	0.67223	0.775275	0.911287	1.07469	1.26761	1.65746	2.28594	3.7207	7.78883
0.0446066	0.0944108	0.134551	0.173522	0.207812	0.246068	0.290758	0.328395	0.39142	0.448482	0.511459	0.58965	0.672577	0.775462	0.912864	1.07525	1.26789	1.66088	2.28605	3.7207	7.79243
0.0446102	0.0945042	0.134578	0.173649	0.207812	0.246089	0.290802	0.328803	0.39173	0.448508	0.511846	0.589757	0.672593	0.77635	0.913985	1.07538	1.26855	1.66141	2.29233	3.727	7.79492
0.044624	0.0947968	0.134614	0.173707	0.207812	0.246182	0.290935	0.32882	0.391815	0.448801	0.511981	0.590066	0.672724	0.777441	0.91434	1.07598	1.2695	1.66242	2.29589	3.72896	7.81672
0.0446542	0.0950893	0.134625	0.173707	0.207812	0.246472	0.291238	0.328908	0.392097	0.44886	0.512076	0.59031	0.672809	0.777506	0.914395	1.07619	1.27161	1.6625	2.29714	3.74886	7.97464
0.0447374	0.0952291	0.134699	0.173727	0.207812	0.24651	0.291335	0.329219	0.392181	0.448929	0.512434	0.590687	0.673157	0.777688	0.915296	1.0767	1.27316	1.66295	2.29824	3.74936	8.08694
0.0447835	0.0952458	0.134769	0.173742	0.207812	0.246629	0.291433	0.329646	0.392245	0.449323	0.512443	0.591319	0.673594	0.777854	0.915619	1.07777	1.27372	1.66395	2.30081	3.75293	8.10155
0.0448555	0.0953568	0.134841	0.174015	0.207812	0.246762	0.291598	0.329704	0.392336	0.44936	0.512806	0.591536	0.674019	0.777855	0.9189	1.07896	1.27394	1.66395	2.30087	3.76464	8.27897
0.0449237	0.0953686	0.134878	0.174178	0.207812	0.247494	0.291989	0.330436	0.392849	0.449397	0.512922	0.591713	0.674232	0.778197	0.919258	1.07938	1.27673	1.6666	2.30134	3.76835	8.27897
0.044992	0.095378	0.134925	0.174263	0.207812	0.247786	0.292189	0.330847	0.392892	0.449453	0.513202	0.591752	0.674257	0.778613	0.919583	1.07954	1.27697	1.66693	2.30974	3.77173	8.47651
0.044995	0.0954369	0.134935	0.174302	0.207812	0.247805	0.292266	0.331562	0.393051	0.450082	0.513528	0.592103	0.674933	0.778632	0.921692	1.08265	1.27881	1.67024	2.311	3.776	8.4857
0.0450436	0.095479	0.135238	0.174496	0.207812	0.247846	0.292536	0.331943	0.393152	0.45018	0.514077	0.592103	0.67598	0.778882	0.922152	1.08274	1.27881	1.67024	2.31889	3.78332	8.5243
0.0450485	0.0955001	0.135258	0.174543	0.207813	0.248047	0.292663	0.332056	0.393495	0.450182	0.514121	0.592184	0.676347	0.779198	0.922826	1.08316	1.27937	1.67024	2.32138	3.78812	8.53615
0.0451385	0.0955396	0.135304	0.174601	0.207813	0.248047	0.292798	0.332425	0.39401	0.450193	0.514164	0.592414	0.676401	0.779386	0.922888	1.08352	1.27951	1.67024	2.32376	3.79951	8.56587
0.045194	0.0955468	0.135367	0.174736	0.207813	0.248047	0.29291	0.333001	0.394234	0.450302	0.5143	0.592558	0.676586	0.7795	0.92489	1.08394	1.27957	1.67225	2.32424	3.80452	8.56951
0.0452534	0.095606	0.135395	0.17483	0.207813	0.248047	0.292955	0.333129	0.39427	0.450311	0.514676	0.593255	0.676783	0.780177	0.925121	1.08644	1.2836	1.67307	2.32607	3.81734	8.64684
0.0453441	0.0956132	0.135455	0.17486	0.207813	0.248047	0.293057	0.333533	0.394438	0.450482	0.514925	0.593286	0.677318	0.780475	0.926288	1.08688	1.28512	1.67549	2.32718	3.84504	8.67615
0.0454	0.095643	0.135484	0.174971	0.207813	0.248047	0.29313	0.333599	0.39452	0.450518	0.515243	0.593684	0.677434	0.781088	0.926897	1.08767	1.28542	1.67826	2.32859	3.84775	8.69338
0.0454474	0.0957618	0.135579	0.175189	0.207813	0.248047	0.293407	0.333741	0.394873	0.45062	0.51532	0.593898	0.677905	0.781164	0.926919	1.08775	1.28933	1.68146	2.33868	3.86315	8.76242
0.0455862	0.0957976	0.135607	0.175488	0.207813	0.248047	0.293441	0.334209	0.39489	0.451172	0.515339	0.593971	0.678465	0.7812	0.927676	1.08823	1.29233	1.68234	2.33989	3.88222	8.80224
0.0456246	0.0959263	0.135622	0.175493	0.207813	0.248047	0.293531	0.334266	0.394893	0.451677	0.515387	0.594081	0.678779	0.781525	0.927767	1.08965	1.29296	1.68251	2.34007	3.8833	8.8578
0.0457433	0.0960145	0.135707	0.175623	0.207813	0.248047	0.293582	0.33432	0.395124	0.451727	0.515769	0.594304	0.679071	0.781551	0.928077	1.09002	1.29345	1.68418	2.34007	3.91952	8.88871
0.0458801	0.0960689	0.135724	0.175689	0.207813	0.248047	0.293653	0.334419	0.39519	0.452009	0.515898	0.594803	0.679194	0.781681	0.928159	1.09033	1.29525	1.68966	2.34007	3.92197	8.91657
0.0458969	0.0962614	0.135759	0.175781	0.207813	0.248047	0.293789	0.334696	0.395762	0.452042	0.516756	0.594812	0.6797	0.781809	0.928537	1.09126	1.29629	1.69055	2.34007	3.92197	8.9251
0.045962	0.0962873	0.135844	0.175836	0.207813	0.248047	0.293864	0.334794	0.39598	0.452076	0.517462	0.595112	0.679824	0.783909	0.929366	1.092	1.2965	1.69223	2.34007	3.92197	8.92641
0.0460224	0.0963727	0.136008	0.175842	0.207813	0.248047	0.293891	0.334925	0.396302	0.452125	0.517494	0.596109	0.679839	0.784393	0.929366	1.09211	1.29716	1.69579	2.34007	3.92197	11.792
0.0460447	0.0964347	0.136018	0.17599	0.207813	0.248047	0.293891	0.335752	0.396345	0.452581	0.517664	0.596189	0.680236	0.784393	0.929442	1.09213	1.29724	1.69657	2.34007	3.92197	11.8571
0.0460534	0.0964925	0.136069	0.176111	0.207868	0.248047	0.293891	0.335841	0.396416	0.453201	0.518239	0.596396	0.681044	0.784393	0.929625	1.09227	1.2982	1.699	2.34218	3.92677	12.0322
0.0460715	0.0966212	0.136166	0.176239	0.208015	0.248047	0.293891	0.336348	0.396926	0.454331	0.518401	0.596431	0.681328	0.784393	0.929968	1.09232	1.3	1.69964	2.34488	3.93263	12.2375
0.0461549	0.0966685	0.136192	0.176581	0.208126	0.248047	0.293891	0.336406	0.39728	0.454578	0.518734	0.596494	0.681568	0.784609	0.930469	1.09243	1.30221	1.70007	2.34517	3.9388	12.4642
0.0461671	0.0966912	0.136213	0.176609	0.208337	0.248047	0.293891	0.336564	0.397332	0.454716	0.518751	0.596577	0.681783	0.784674	0.930469	1.0935	1.30367	1.7009	2.3471	3.93905	12.5135
0.0462143	0.0967577	0.136312	0.176638	0.208449	0.248047	0.293891	0.336572	0.397383	0.454813	0.518774	0.596668	0.681817	0.78553	0.930469	1.09394	1.30424	1.70226	2.35026	3.94724	12.6892
0.0462767	0.0968001	0.136325	0.176644	0.208762	0.248047	0.293891	0.336902	0.39765	0.454826	0.518854	0.596706	0.682246	0.786477	0.930469	1.09425	1.3046	1.7026	2.3577	3.96875	12.9365
0.0463317	0.0968405	0.13636	0.176786	0.20893	0.248047	0.293891	0.337158	0.397707	0.454978	0.519366	0.596807	0.68234	0.786726	0.930469	1.09438	1.30469	1.70418	2.35898	3.97899	12.9365
0.0463377	0.0968509	0.136381	0.176868	0.208999	0.248047	0.293891	0.337498	0.397876	0.454993	0.519458	0.597347	0.682894	0.786833	0.930469	1.09581	1.30752	1.70487	2.36854	3.98061	12.9579
0.0464123	0.0969168	0.136418	0.176921	0.20925	0.248047	0.293891	0.337567	0.398121	0.45531	0.519493	0.597405	0.683638	0.787249	0.930469	1.09672	1.3083	1.70519	2.36892	3.9867	12.9959
0.0465384	0.0969794	0.136651	0.177052	0.209272	0.248047	0.293891	0.337644	0.398131	0.455566	0.519799	0.597766	0.683837	0.787569	0.930469	1.09758	1.30972	1.708	2.37605	3.9885	13.1839
0.0466272	0.0969933	0.136745	0.177094	0.20932	0.248047	0.293891	0.337883	0.39912	0.455623	0.520083	0.597855	0.683867	0.78785	0.930469	1.09771	1.30981	1.71077	2.3825	4.0017	13.2374
0.0466481	0.0970593	0.136807	0.177391	0.209455	0.248047	0.293891	0.338101	0.399131	0.455708	0.520096	0.598662	0.684108	0.787861	0.930469	1.09785	1.3103	1.71324	2.38401	4.00989	13.2607
0.0466566	0.097109	0.136926	0.177414	0.209552	0.248047	0.293891	0.338285	0.399233	0.455961	0.520198	0.599039	0.684729	0.787949	0.93202	1.09831	1.31086	1.71381	2.38961	4.01217	13.3347
0.046757	0.0972341	0.136927	0.17749	0.209615	0.248047	0.293891	0.338394	0.399362	0.456118	0.520275	0.599725	0.684858	0.787984	0.932324	1.09927	1.31246	1.71521	2.39232	4.0189	16.6764
0.0467712	0.0972885	0.136958	0.177593	0.209852	0.248047	0.293891	0.338471	0.399815	0.456379	0.520953	0.599729	0.685232	0.788826	0.932451	1.09927	1.3132	1.71638	2.40376	4.0391	16.8909
0.0468121	0.0974384	0.136988	0.177661	0.209883	0.248047	0.293891	0.338552	0.40026	0.456538	0.521217	0.600287	0.685235	0.788994	0.932773	1.10017	1.31588	1.71915	2.40536	4.05551	16.8909
0.046814	0.0974986	0.137009	0.177717	0.210187	0.248047	0.293891	0.33898	0.400472	0.457135	0.521409	0.600459	0.686241	0.789049	0.933809	1.10309	1.31719	1.72412	2.40563	4.05772	16.9327
0.046925	0.0975837	0.137009	0.177808	0.210229	0.248047	0.293891	0.338981	0.400498	0.457342	0.521527	0.60054	0.68684	0.789873	0.934096	1.10429	1.32043	1.72803	2.40691	4.0578	17.1062
0.0469317	0.0976043	0.137258	0.177844	0.210359	0.248047	0.293891	0.339037	0.400603	0.457578	0.521629	0.600939	0.687285	0.790631	0.934165	1.10471	1.32077	1.73084	2.40714	4.07119	17.2745
0.0469893	0.0976446	0.137298	0.177934	0.210384	0.248084	0.293891	0.339058	0.400949	0.457766	0.521683	0.6011	0.687733	0.790839	0.936321	1.10708	1.32283	1.73414	2.40949	4.07982	17.3225
0.0469973	0.0977021	0.13733	0.177986	0.210537	0.248268	0.293894	0.339128	0.40095	0.458298	0.521963	0.601261	0.687762	0.791129	0.937032	1.10896	1.32343	1.73599	2.41682	4.09021	17.6602
0.0470003	0.0977048	0.137726	0.177988	0.210549	0.24829	0.294037	0.339187	0.401047	0.458398	0.522224	0.601502	0.687809	0.791336	0.937726	1.1093	1.32648	1.73607	2.42107	4.10128	17.8266
0.0470338	0.0978143	0.137798	0.178115	0.210602	0.24848	0.29462	0.339446	0.402353	0.458664	0.522763	0.601766	0.68828	0.791371	0.937975	1.10996	1.32702	1.73633	2.42136	4.10862	17.8766
0.0470429	0.0978526	0.137866	0.178258	0.210726	0.248496	0.29478	0.339584	0.402625	0.458687	0.523133	0.601835	0.688325	0.791671	0.938098	1.11007	1.32931	1.73806	2.42271	4.11493	17.8869
0.0470889	0.0978744	0.138009	0.178326	0.210826	0.248647	0.2948	0.339667	0.402641	0.458907	0.523937	0.60244	0.688767	0.791921	0.938136	1.11051	1.33061	1.73962	2.42402	4.13476	17.959
0.0471108	0.0979236	0.138023	0.178486	0.210842	0.248686	0.29487	0.339785	0.402816	0.459088	0.524235	0.602641	0.689462	0.79226	0.938187	1.11135	1.33065	1.7402	2.43044	4.13871	18.0938
0.0471109	0.0979695	0.138122	0.178501	0.211162	0.248889	0.295042	0.339819	0.402823	0.459126	0.524668	0.603248	0.689651	0.792554	0.941667	1.11307	1.33065	1.74509	2.43094	4.14368	18.3018
0.0471402	0.0982316	0.138142	0.178504	0.211169	0.249073	0.295045	0.339958	0.402931	0.459227	0.524708	0.603279	0.689694	0.79279	0.943142	1.1132	1.33065	1.74706	2.43162	4.14849	18.3018
0.0471479	0.0984209	0.138237	0.178593	0.211325	0.249242	0.295172	0.340882	0.402935	0.459435	0.524798	0.60334	0.690403	0.792791	0.943337	1.11462	1.33072	1.74904	2.44292	4.15566	18.5107
0.0472034	0.0984282	0.138303	0.178605	0.211377	0.249398	0.295491	0.340949	0.40304	0.459557	0.525876	0.603707	0.690571	0.792817	0.946973	1.11532	1.33195	1.75068	2.44722	4.15802	18.5107
0.0472151	0.0984828	0.138375	0.178617	0.211671	0.249688	0.295507	0.341299	0.403167	0.45984	0.526043	0.603714	0.690911	0.792859	0.947451	1.11597	1.33219	1.75179	2.45445	4.15802	18.5107
0.0472156	0.0985046	0.138389	0.178624	0.211953	0.249743	0.295899	0.341839	0.403517	0.460272	0.526059	0.604003	0.691125	0.794605	0.947488	1.11758	1.33316	1.75297	2.45733	4.15892	18.5107
0.0473477	0.0985155	0.138469	0.178634	0.212307	0.24977	0.296261	0.34185	0.403558	0.460674	0.526536	0.604253	0.691242	0.794626	0.947539	1.11828	1.33343	1.75312	2.45836	4.17171	18.5306
0.0474284	0.0985802	0.138548	0.178763	0.212349	0.250024	0.296299	0.342523	0.403662	0.46071	0.526818	0.604428	0.69174	0.794831	0.948438	1.11828	1.33437	1.75325	2.45909	4.18305	18.7501
0.0475346	0.098602	0.138569	0.17899	0.21243	0.250076	0.2964	0.342643	0.404073	0.461326	0.526866	0.604545	0.692044	0.796259	0.950107	1.11828	1.33457	1.75332	2.47334	4.19768	18.9703
0.0475508	0.0986252	0.138681	0.179227	0.212588	0.250255	0.296503	0.34306	0.404095	0.461427	0.526904	0.604563	0.692448	0.796379	0.950649	1.11849	1.33541	1.75396	2.47634	4.19978	19.3047
0.047632	0.0986379	0.13899	0.179298	0.212726	0.250321	0.29659	0.343076	0.404118	0.461429	0.527025	0.604578	0.692713	0.796839	0.95106	1.11902	1.33566	1.75396	2.47939	4.2015	19.8592
0.0476779	0.0986731	0.139051	0.17933	0.21275	0.250428	0.296611	0.343134	0.404179	0.461472	0.527221	0.604617	0.69353	0.797022	0.951089	1.1191	1.33577	1.75458	2.48047	4.21112	20.0795
0.0476831	0.0987055	0.139171	0.17934	0.212765	0.250478	0.296887	0.34324	0.404458	0.461663	0.527315	0.605116	0.69353	0.797048	0.95135	1.1191	1.33577	1.75577	2.48047	4.23341	20.3005
0.0477522	0.0990614	0.13918	0.17934	0.212802	0.250621	0.297082	0.343315	0.404481	0.461716	0.527402	0.605335	0.693539	0.798229	0.952903	1.11911	1.33577	1.75621	2.48047	4.2417	20.522
0.0477881	0.0990708	0.139196	0.179459	0.212816	0.250993	0.297276	0.343431	0.404702	0.462028	0.528037	0.605775	0.69362	0.798265	0.953557	1.11914	1.33577	1.75816	2.48047	4.24745	20.5295
0.0478809	0.0991244	0.139287	0.179713	0.212837	0.251001	0.297345	0.343904	0.405521	0.46216	0.528688	0.605964	0.695897	0.798268	0.95369	1.11958	1.33577	1.75866	2.48047	4.24867
0.047885	0.099237	0.139341	0.179885	0.212852	0.251063	0.297887	0.343943	0.405917	0.462212	0.528772	0.606052	0.695997	0.798777	0.953979	1.12011	1.33577	1.7589	2.48047	4.25562
0.0479352	0.0992759	0.139392	0.179915	0.212943	0.251076	0.298086	0.344128	0.406066	0.462383	0.528806	0.606316	0.696031	0.799726	0.954293	1.1204	1.33577	1.75982	2.48047	4.28037
0.0479381	0.0993044	0.139399	0.179942	0.21308	0.251144	0.29822	0.344216	0.406095	0.462424	0.529468	0.606478	0.69652	0.799751	0.954763	1.1222	1.33643	1.76214	2.48047	4.28416
0.0479394	0.0993935	0.139408	0.179967	0.213086	0.251166	0.298262	0.344254	0.406303	0.462557	0.529711	0.606897	0.696589	0.800633	0.956067	1.12282	1.33723	1.76428	2.48047	4.28991
0.048006	0.0993953	0.139446	0.180051	0.213092	0.251208	0.298344	0.344427	0.406356	0.462567	0.52991	0.607192	0.696719	0.801349	0.956114	1.12418	1.33837	1.76549	2.48047	4.29316
0.0480372	0.0994062	0.139762	0.180164	0.213129	0.251223	0.298859	0.344445	0.406481	0.462603	0.53012	0.607449	0.696741	0.801971	0.956192	1.12461	1.34126	1.77391	2.48047	4.2987
0.0480422	0.0994202	0.139838	0.180203	0.213135	0.25138	0.299031	0.344531	0.406676	0.462613	0.530292	0.607484	0.696963	0.802115	0.956325	1.12529	1.34213	1.7741	2.48047	4.30744
0.0481197	0.0994712	0.13986	0.180278	0.213222	0.251516	0.299073	0.344577	0.407631	0.462974	0.530698	0.607543	0.697527	0.80223	0.958006	1.12613	1.34278	1.78052	2.48047	4.32861
0.0481289	0.0995775	0.14	0.1805	0.213298	0.251692	0.299086	0.344731	0.407849	0.463325	0.530723	0.608614	0.697882	0.802434	0.958151	1.12709	1.34587	1.78067	2.48047	4.32924
0.0482094	0.0997088	0.140089	0.180538	0.213358	0.251792	0.299111	0.344988	0.408107	0.463339	0.531223	0.609427	0.697953	0.802553	0.958313	1.12778	1.34603	1.78086	2.48047	4.34409
0.0482153	0.0997168	0.140348	0.180601	0.213378	0.25199	0.299116	0.345076	0.40831	0.463729	0.531448	0.609476	0.699057	0.802612	0.958946	1.12886	1.34844	1.78187	2.48376	4.346
0.0482295	0.099732	0.140395	0.18062	0.213417	0.252284	0.299132	0.345657	0.408338	0.46375	0.531608	0.609484	0.699419	0.802861	0.960079	1.12932	1.34875	1.78212	2.48533	4.34881
0.048231	0.0998057	0.140551	0.18067	0.213678	0.252364	0.299182	0.345686	0.408482	0.463755	0.531848	0.609546	0.699457	0.802945	0.960144	1.12988	1.34993	1.78341	2.48646	4.35598
0.0482314	0.0998778	0.140563	0.180706	0.214008	0.252416	0.299286	0.345929	0.408645	0.463791	0.531875	0.609596	0.700299	0.802962	0.96023	1.1299	1.35027	1.78379	2.48652	4.36756
0.0482462	0.0998993	0.140656	0.180727	0.21426	0.252489	0.299323	0.346023	0.408918	0.464586	0.532388	0.609685	0.700785	0.803135	0.961351	1.13033	1.35163	1.78615	2.48886	4.37025
0.0483103	0.100054	0.140724	0.181079	0.21437	0.252621	0.299514	0.346247	0.409005	0.464683	0.532407	0.609752	0.701583	0.803975	0.961619	1.13046	1.35368	1.7862	2.48988	4.3954
0.0483445	0.100081	0.140773	0.181269	0.214509	0.252661	0.29955	0.346298	0.409067	0.464683	0.532411	0.609851	0.701583	0.803977	0.963626	1.13088	1.35507	1.7875	2.49081	4.3954
0.0483502	0.100194	0.140893	0.181272	0.214616	0.252695	0.299853	0.346393	0.409265	0.464683	0.532587	0.61023	0.702208	0.804252	0.964638	1.13159	1.35615	1.78869	2.49243	4.3954
0.0483918	0.100314	0.140991	0.181348	0.214896	0.252911	0.300017	0.346433	0.409408	0.464683	0.532711	0.610307	0.70231	0.804315	0.965196	1.13358	1.35668	1.78869	2.49284	4.3954
0.04842	0.100373	0.141018	0.181492	0.214933	0.253002	0.300107	0.346441	0.409657	0.464683	0.532885	0.610973	0.702685	0.805104	0.96669	1.13448	1.35775	1.78914	2.49284	4.3954
0.0484525	0.100406	0.141028	0.181494	0.215036	0.25308	0.300177	0.346574	0.409661	0.464683	0.532995	0.611115	0.702756	0.805709	0.969278	1.13556	1.35856	1.79027	2.49284	4.42539
0.0486162	0.100452	0.141331	0.181902	0.215063	0.25317	0.300177	0.346693	0.409721	0.464683	0.533025	0.611117	0.703016	0.807709	0.971237	1.13692	1.3604	1.79097	2.49298	4.43477
0.0486664	0.10047	0.141366	0.181912	0.215319	0.253402	0.300246	0.347006	0.410294	0.464683	0.533075	0.611283	0.703193	0.807921	0.971478	1.13693	1.36142	1.79233	2.49319	4.44185
0.0486943	0.100559	0.14149	0.182031	0.215428	0.253423	0.300352	0.347105	0.41048	0.464683	0.5331	0.612023	0.704117	0.807932	0.971849	1.139	1.36278	1.79863	2.49572	4.47391
0.0487149	0.10065	0.141616	0.182127	0.21557	0.253752	0.300517	0.347126	0.410824	0.464683	0.533139	0.612723	0.704162	0.808228	0.972155	1.13965	1.36341	1.8019	2.50018	4.49034
0.0488737	0.10068	0.141715	0.182227	0.21583	0.253752	0.30053	0.347144	0.410952	0.464683	0.533584	0.61319	0.704968	0.808555	0.972386	1.13991	1.36463	1.80329	2.50789	4.51017
0.0489182	0.100856	0.141729	0.18234	0.215992	0.253821	0.300588	0.347321	0.411059	0.464683	0.533713	0.614202	0.705029	0.809486	0.972475	1.14043	1.36465	1.80361	2.50842	4.51161
0.0489774	0.100879	0.14174	0.182355	0.216219	0.253862	0.300605	0.347441	0.411299	0.464683	0.533821	0.61436	0.705345	0.810621	0.973133	1.1431	1.36587	1.80601	2.51509	4.51632
0.0491279	0.100894	0.141899	0.18248	0.21628	0.253869	0.300727	0.347521	0.411848	0.464683	0.534071	0.614384	0.705357	0.811074	0.973438	1.14352	1.36639	1.80734	2.51553	4.52071
0.0491784	0.100959	0.141947	0.182497	0.216509	0.253897	0.300908	0.34767	0.412337	0.464683	0.534253	0.614588	0.705737	0.812009	0.974032	1.14365	1.3668	1.80851	2.51701	4.52331
0.0491971	0.101024	0.141962	0.182679	0.216542	0.254003	0.300951	0.347825	0.412376	0.464683	0.53451	0.614642	0.705872	0.812085	0.974083	1.14374	1.36968	1.80851	2.52358	4.52893
0.0492534	0.101058	0.141997	0.182782	0.216608	0.254104	0.301379	0.348091	0.412704	0.464745	0.534865	0.615065	0.705904	0.812698	0.974292	1.14387	1.37329	1.80851	2.52538	4.53499
0.0492701	0.101074	0.142002	0.182848	0.216769	0.254217	0.301477	0.348206	0.412783	0.465281	0.535862	0.615328	0.705952	0.812714	0.97482	1.14395	1.3735	1.80851	2.52758	4.56605
0.049387	0.101162	0.142021	0.182906	0.216772	0.254445	0.302021	0.348231	0.412923	0.465325	0.53614	0.615552	0.706236	0.812952	0.974879	1.14558	1.38003	1.80851	2.52959	4.58974
0.049402	0.101194	0.142064	0.18291	0.216831	0.254455	0.302151	0.348255	0.413027	0.46535	0.536235	0.615987	0.706461	0.816473	0.97488	1.14597	1.38099	1.80851	2.52959	4.59153
0.0494175	0.101247	0.142071	0.182918	0.216831	0.25463	0.302263	0.348269	0.413053	0.465455	0.536284	0.616166	0.707162	0.81654	0.9763	1.14644	1.38192	1.80851	2.52959	4.59749
0.0494665	0.101292	0.142183	0.182974	0.216917	0.254801	0.30235	0.348419	0.413054	0.4655	0.536606	0.616273	0.70736	0.816593	0.977023	1.14657	1.38315	1.81013	2.52959	4.60709
0.0494878	0.101351	0.142225	0.183095	0.217174	0.254866	0.302654	0.348822	0.413228	0.465542	0.53699	0.616384	0.708064	0.81679	0.977208	1.14692	1.38357	1.81034	2.52959	4.61599
0.0494954	0.101416	0.142273	0.183246	0.217178	0.255077	0.302739	0.348974	0.413263	0.465565	0.537436	0.616502	0.709118	0.818572	0.977838	1.14763	1.38706	1.81342	2.52959	4.61778
0.0494996	0.101658	0.142306	0.18328	0.217384	0.255116	0.302769	0.348992	0.413491	0.465679	0.537509	0.616583	0.710066	0.818954	0.9781	1.14809	1.38706	1.81928	2.52959	4.63279
0.0495102	0.101808	0.142365	0.183302	0.217412	0.255182	0.303472	0.349099	0.41354	0.466737	0.537817	0.61663	0.71014	0.819941	0.978922	1.14813	1.38706	1.81977	2.52959	4.6339
0.0495746	0.101815	0.14237	0.183339	0.217603	0.255206	0.303745	0.349104	0.4136	0.466854	0.53794	0.616633	0.710898	0.821345	0.979532	1.14832	1.38706	1.82227	2.53155	4.63748
0.0496099	0.101847	0.142402	0.183393	0.217606	0.255439	0.303757	0.349207	0.413847	0.466937	0.538138	0.617042	0.71094	0.822066	0.979862	1.1491	1.38824	1.82492	2.5339	4.64158
0.0496099	0.10196	0.142427	0.183405	0.217779	0.255519	0.30398	0.349601	0.414165	0.467073	0.538506	0.617104	0.711341	0.82227	0.9808	1.14948	1.38896	1.82505	2.53744	4.64232
0.0496638	0.10205	0.142485	0.183472	0.217788	0.255556	0.304024	0.349711	0.414234	0.467267	0.538611	0.61721	0.711475	0.823468	0.9808	1.15018	1.38901	1.82622	2.54932	4.64683
0.0496926	0.102054	0.142551	0.183514	0.21787	0.255745	0.30404	0.34988	0.414273	0.467338	0.53888	0.617245	0.711659	0.823555	0.982279	1.15087	1.38925	1.82913	2.55099	4.64683
0.0497116	0.102071	0.142992	0.183641	0.217909	0.255874	0.304068	0.350016	0.414452	0.467362	0.539145	0.617384	0.711922	0.824579	0.982381	1.15276	1.39023	1.83154	2.5538	4.64683
0.0498087	0.102162	0.143304	0.183691	0.218375	0.256423	0.304684	0.350045	0.414611	0.467669	0.5396	0.617388	0.713442	0.824762	0.982931	1.15366	1.39046	1.83224	2.56928	4.65076
0.0498099	0.102384	0.143304	0.183836	0.218574	0.256529	0.304729	0.350133	0.414671	0.468534	0.539649	0.618026	0.713629	0.82482	0.983212	1.15455	1.39296	1.83519	2.56951	4.65234
0.0498151	0.102392	0.143393	0.183886	0.218579	0.256595	0.305104	0.350272	0.414715	0.468585	0.539663	0.61821	0.713904	0.825118	0.984006	1.1554	1.39344	1.83563	2.57044	4.65234
0.0498748	0.102411	0.143455	0.183893	0.218877	0.256733	0.305171	0.350278	0.414823	0.468665	0.539827	0.618257	0.714213	0.825324	0.984719	1.15548	1.39398	1.83563	2.57338	4.65937
0.0499191	0.102438	0.143496	0.183924	0.218964	0.257156	0.305374	0.350386	0.414832	0.468694	0.539952	0.618889	0.714967	0.82553	0.984738	1.15609	1.39405	1.83668	2.57932	4.66068
0.050025	0.102441	0.143506	0.184007	0.219035	0.257337	0.305765	0.350394	0.415149	0.468926	0.540053	0.618912	0.715416	0.826542	0.98477	1.15931	1.39445	1.83949	2.58192	4.67306
0.0501992	0.102453	0.143555	0.184065	0.219423	0.257426	0.30593	0.350539	0.41526	0.46902	0.540097	0.619001	0.715697	0.826656	0.985311	1.15974	1.3955	1.83957	2.58969	4.67767
0.0502333	0.102469	0.143718	0.1843	0.219465	0.257457	0.305982	0.350635	0.415334	0.469051	0.540504	0.619987	0.716497	0.826728	0.985399	1.16037	1.39603	1.84042	2.59535	4.68401
0.0502515	0.102578	0.143902	0.184328	0.219565	0.257633	0.306151	0.350791	0.415592	0.469995	0.540642	0.620118	0.717788	0.827113	0.986501	1.16057	1.39663	1.84088	2.61775	4.68983
0.0502546	0.102584	0.143918	0.184468	0.219789	0.258007	0.306378	0.350791	0.415625	0.470154	0.540689	0.620136	0.717854	0.827118	0.986553	1.16258	1.3978	1.84329	2.6287	4.69289
0.0502556	0.102692	0.143941	0.184592	0.219917	0.258262	0.306398	0.350815	0.415625	0.470159	0.540804	0.620212	0.718245	0.827281	0.986696	1.16297	1.40054	1.84434	2.63026	4.69499
0.0502556	0.102695	0.144172	0.18464	0.219931	0.258412	0.306435	0.351007	0.415625	0.470211	0.540804	0.620312	0.718302	0.82788	0.987135	1.16326	1.40166	1.84599	2.63904	4.70974
0.0502563	0.102772	0.144246	0.184733	0.22014	0.258423	0.306912	0.351158	0.415625	0.470339	0.541104	0.620312	0.718515	0.828528	0.987645	1.16413	1.40317	1.84751	2.64016	4.71691
0.0502595	0.102882	0.144262	0.185035	0.220373	0.258436	0.306918	0.351372	0.415625	0.470699	0.541232	0.620312	0.718541	0.828774	0.987827	1.16441	1.40421	1.84752	2.64573	4.71941
0.0502637	0.102896	0.144332	0.185073	0.220553	0.258522	0.306974	0.351383	0.415625	0.470718	0.541268	0.620312	0.71913	0.82926	0.988087	1.16469	1.40421	1.84817	2.6464	4.7231
0.0502884	0.102934	0.144437	0.185084	0.220579	0.258666	0.307154	0.351559	0.415625	0.471912	0.541464	0.620312	0.720416	0.830641	0.9881	1.16492	1.40429	1.8504	2.65326	4.72387
0.0503361	0.103052	0.144585	0.185422	0.220742	0.258748	0.307278	0.351636	0.415625	0.472065	0.542143	0.620312	0.720517	0.83125	0.988308	1.16571	1.40484	1.85701	2.66077	4.7338
0.0503586	0.103204	0.144613	0.185514	0.220833	0.258759	0.307439	0.352133	0.415625	0.472597	0.542336	0.620312	0.721411	0.83125	0.989017	1.1658	1.4057	1.85802	2.66795	4.75823
0.050382	0.103204	0.14468	0.185517	0.220887	0.258815	0.307627	0.352136	0.415625	0.472667	0.542497	0.620312	0.721696	0.83125	0.990513	1.16612	1.40575	1.86398	2.66897	4.75951
0.0504341	0.103235	0.144933	0.185645	0.220918	0.259122	0.30818	0.352382	0.415625	0.472836	0.542518	0.620313	0.722781	0.83125	0.990568	1.16675	1.40668	1.86564	2.67155	4.76027
0.0506022	0.103584	0.14499	0.185665	0.221222	0.259129	0.30842	0.352594	0.415625	0.47296	0.542655	0.620313	0.722793	0.83125	0.991008	1.16711	1.40732	1.86728	2.67328	4.76044
0.0506692	0.103599	0.145085	0.185679	0.221744	0.259238	0.308651	0.352684	0.415625	0.473316	0.542942	0.620313	0.723634	0.83125	0.992188	1.16765	1.40779	1.86871	2.67489	4.77694
0.0506819	0.103653	0.145094	0.185729	0.221818	0.259347	0.308934	0.352839	0.415625	0.473339	0.543136	0.620313	0.724222	0.83125	0.992188	1.16768	1.40806	1.86932	2.67558	4.79587
0.0507161	0.103792	0.145124	0.185746	0.221895	0.259443	0.309058	0.352908	0.415625	0.473639	0.543783	0.620313	0.724248	0.83125	0.992188	1.16852	1.40817	1.87031	2.68134	4.81829
0.0507341	0.103818	0.145209	0.185876	0.221917	0.259461	0.309357	0.353315	0.415625	0.474049	0.544078	0.62063	0.724884	0.83125	0.992188	1.16972	1.40836	1.87091	2.6832	4.83195
0.0509169	0.103916	0.145359	0.186057	0.221939	0.259488	0.309392	0.353432	0.415625	0.474163	0.544187	0.620914	0.725489	0.832169	0.992188	1.17003	1.4131	1.87213	2.68395	4.84388
0.0509742	0.104065	0.145414	0.186122	0.222017	0.259713	0.309427	0.353592	0.415625	0.474602	0.544532	0.620927	0.725922	0.832274	0.992188	1.17072	1.41458	1.87262	2.68698	4.85298
0.0510232	0.104119	0.145428	0.186244	0.222081	0.259863	0.309464	0.353778	0.415625	0.474761	0.544874	0.621088	0.726088	0.832385	0.992366	1.17557	1.41706	1.87395	2.70156	4.85744
0.051051	0.10417	0.14548	0.186307	0.222129	0.260074	0.309638	0.353796	0.415625	0.474972	0.54503	0.621124	0.726196	0.832522	0.992385	1.17557	1.4218	1.875	2.70156	4.86734
0.0510544	0.104377	0.145597	0.186561	0.222191	0.260277	0.309705	0.353868	0.415625	0.475631	0.545561	0.621309	0.726196	0.834191	0.992591	1.17557	1.42423	1.87763	2.70156	4.87335
0.0510637	0.104385	0.145786	0.186562	0.222631	0.260635	0.309939	0.353992	0.415625	0.475663	0.545931	0.621345	0.726311	0.836225	0.992791	1.17581	1.42563	1.87837	2.70261	4.87335
0.0511488	0.104479	0.145847	0.186618	0.222852	0.260954	0.30998	0.354066	0.415625	0.475711	0.546251	0.621356	0.727742	0.837319	0.994625	1.17598	1.42575	1.88014	2.70728	4.87581
0.051152	0.104657	0.14592	0.186742	0.223028	0.26096	0.310091	0.354232	0.415625	0.475783	0.546364	0.621464	0.727806	0.839056	0.994652	1.17666	1.42699	1.88026	2.70852	4.87724
0.0511854	0.104694	0.145931	0.186912	0.223325	0.261004	0.310156	0.354416	0.415625	0.476425	0.547123	0.622356	0.7279	0.839972	0.994987	1.17745	1.42912	1.88066	2.70879	4.88042
0.051197	0.104866	0.145988	0.186916	0.223522	0.261118	0.310156	0.354636	0.415625	0.476755	0.547262	0.623087	0.728078	0.840444	0.995697	1.17932	1.43116	1.8836	2.711	4.88564
0.0512744	0.104915	0.146115	0.18705	0.223597	0.261135	0.310156	0.354916	0.415625	0.476802	0.54738	0.623326	0.728661	0.840843	0.997515	1.17934	1.43751	1.88539	2.72395	4.88878
0.0512901	0.104942	0.146281	0.187152	0.2236	0.261241	0.310156	0.354986	0.415625	0.476821	0.547459	0.623437	0.728766	0.841297	0.998043	1.17934	1.44057	1.88705	2.72521	4.904
0.0513201	0.104945	0.1463	0.187166	0.223767	0.261304	0.310156	0.355115	0.415625	0.477107	0.547714	0.623437	0.728964	0.842557	0.999045	1.17937	1.44635	1.88951	2.73699	4.904
0.0513786	0.104966	0.146388	0.187505	0.224018	0.261326	0.310156	0.355287	0.415625	0.477154	0.547796	0.623437	0.729015	0.843099	0.999907	1.18015	1.44635	1.89018	2.73977	4.91011
0.0513837	0.104969	0.146481	0.187673	0.224039	0.261475	0.310156	0.355727	0.415625	0.477339	0.548071	0.623438	0.729872	0.843791	1.00126	1.18113	1.44635	1.89328	2.74425	4.9188
0.0513932	0.105071	0.146496	0.187764	0.224067	0.261482	0.310156	0.355805	0.415625	0.477367	0.548141	0.623438	0.73106	0.845322	1.00141	1.18178	1.44635	1.89395	2.75625	4.92131
0.0514093	0.105116	0.146552	0.188044	0.224134	0.261607	0.310156	0.356053	0.415625	0.47747	0.548415	0.623438	0.731118	0.846448	1.00164	1.18185	1.44635	1.89449	2.75844	4.93448
0.0514675	0.105317	0.1466	0.188067	0.224149	0.261846	0.310156	0.356071	0.415625	0.477511	0.54844	0.623438	0.731595	0.846558	1.00353	1.1828	1.44635	1.89554	2.76036	4.9449
0.051492	0.105359	0.146725	0.18809	0.224235	0.262291	0.310156	0.356549	0.415625	0.478137	0.548551	0.623438	0.731721	0.84686	1.00356	1.18303	1.44635	1.90223	2.76127	4.95578
0.0515347	0.105656	0.146735	0.188355	0.224495	0.262466	0.310156	0.356647	0.415625	0.478138	0.548616	0.623438	0.731794	0.846901	1.00459	1.18333	1.44635	1.90238	2.76202	4.95917
0.051535	0.105692	0.146745	0.188381	0.224537	0.262474	0.310156	0.356704	0.415625	0.478482	0.548698	0.623438	0.73224	0.847017	1.0054	1.18389	1.44635	1.90373	2.76535	4.96182
0.0515366	0.105792	0.14683	0.18842	0.224646	0.263024	0.310156	0.356727	0.415625	0.479341	0.548879	0.623438	0.732352	0.848278	1.00572	1.18408	1.44813	1.90492	2.77019	4.96189
0.0515504	0.105843	0.146852	0.188724	0.224707	0.26309	0.310156	0.356759	0.415625	0.479794	0.548967	0.623438	0.732691	0.848462	1.00608	1.18528	1.44831	1.90582	2.77077	4.96941
0.0515951	0.105943	0.146878	0.188905	0.224816	0.263225	0.310156	0.357031	0.415625	0.480038	0.549523	0.623438	0.733426	0.848513	1.0062	1.18601	1.44967	1.90784	2.77325	4.96948
0.051628	0.105999	0.146881	0.18897	0.224994	0.263276	0.310156	0.3572	0.415625	0.480314	0.549847	0.623438	0.733739	0.849858	1.00723	1.18663	1.45299	1.91209	2.77325	4.98493
0.0516555	0.10603	0.146927	0.189098	0.225095	0.263471	0.310156	0.357261	0.415625	0.480505	0.549942	0.623438	0.733919	0.849908	1.00907	1.18844	1.45314	1.91315	2.77325	4.99046
0.051658	0.106032	0.146951	0.189174	0.225262	0.263505	0.310156	0.357381	0.415625	0.48053	0.550176	0.623438	0.734343	0.850374	1.0106	1.18898	1.45354	1.92022	2.77325	5.00277
0.0516672	0.106156	0.14697	0.189193	0.225315	0.26367	0.310156	0.357557	0.415625	0.480936	0.550317	0.623438	0.734829	0.850376	1.01208	1.19016	1.45434	1.92035	2.77325	5.00624
0.0517036	0.106234	0.146996	0.189209	0.225362	0.263731	0.310156	0.357641	0.415625	0.481047	0.550474	0.623438	0.734967	0.851331	1.01365	1.1902	1.45469	1.92325	2.77693	5.00946
0.0517083	0.106269	0.147157	0.189285	0.225368	0.263973	0.310156	0.357835	0.415761	0.481166	0.550838	0.623438	0.735192	0.851381	1.01516	1.19085	1.45469	1.9235	2.78552	5.0187
0.0517188	0.106279	0.147335	0.189408	0.225689	0.264546	0.310156	0.357954	0.415861	0.481288	0.550845	0.623438	0.735445	0.854735	1.01536	1.19187	1.45702	1.92434	2.79048	5.01982
0.0517529	0.106281	0.147396	0.189467	0.225721	0.264563	0.310156	0.358201	0.415991	0.481307	0.550916	0.623438	0.736227	0.85531	1.0156	1.19324	1.45784	1.92822	2.79066	5.04114
0.0517679	0.106385	0.147476	0.189632	0.225834	0.264602	0.310156	0.358247	0.416067	0.481737	0.550926	0.623438	0.736708	0.855333	1.0156	1.19338	1.46478	1.93125	2.79141	5.05919
0.0517885	0.106386	0.147482	0.189694	0.225854	0.264627	0.310156	0.358686	0.416185	0.481765	0.551887	0.623815	0.737354	0.855743	1.01601	1.19393	1.46579	1.93142	2.7917	5.06074
0.0517988	0.106554	0.147567	0.189783	0.226087	0.264694	0.310156	0.358711	0.416311	0.481792	0.552114	0.623906	0.737551	0.855897	1.01648	1.19463	1.46729	1.93731	2.79462	5.08889
0.0518555	0.106647	0.147606	0.189812	0.226218	0.264889	0.310156	0.358977	0.417283	0.481837	0.553247	0.624034	0.737663	0.856073	1.01705	1.19509	1.46731	1.93731	2.79872	5.09095
0.0519292	0.106703	0.147644	0.19014	0.226288	0.26499	0.310156	0.359015	0.417559	0.482273	0.553478	0.624306	0.737985	0.856341	1.01738	1.19753	1.46744	1.93731	2.80158	5.1013
0.0519469	0.106755	0.147712	0.190187	0.226299	0.265291	0.310156	0.359161	0.417562	0.482912	0.553687	0.624739	0.73829	0.856833	1.01984	1.1978	1.46762	1.93731	2.80375	5.11672
0.0519777	0.106786	0.147821	0.190216	0.22632	0.265502	0.310156	0.359216	0.417632	0.483232	0.553754	0.625138	0.73849	0.856833	1.02107	1.19822	1.46828	1.93843	2.80913	5.1474
0.0520711	0.106818	0.147831	0.19026	0.226605	0.265641	0.310156	0.359276	0.417646	0.48326	0.553761	0.625218	0.739058	0.856833	1.02223	1.19831	1.46862	1.93857	2.80976	5.15799
0.0520911	0.106971	0.147833	0.190268	0.226731	0.266041	0.310156	0.359392	0.418151	0.483875	0.553884	0.625337	0.739179	0.856833	1.02272	1.19834	1.46934	1.94053	2.81589	5.1637
0.0520952	0.107013	0.147844	0.190291	0.226829	0.266189	0.310156	0.359429	0.418201	0.484193	0.55465	0.625962	0.739386	0.856833	1.02286	1.19915	1.46996	1.94235	2.81807	5.20239
0.0521114	0.107041	0.147952	0.190355	0.226843	0.266267	0.310156	0.359529	0.418425	0.484299	0.55465	0.626838	0.739699	0.856833	1.02339	1.20052	1.47325	1.94369	2.81913	5.24946
0.0521119	0.107056	0.147965	0.190578	0.226892	0.2665	0.310156	0.359694	0.418717	0.484643	0.55465	0.626914	0.740614	0.856833	1.02351	1.20132	1.47341	1.94553	2.82115	5.2668
0.0521141	0.107159	0.147995	0.190608	0.226964	0.266564	0.310156	0.359707	0.418866	0.484749	0.55465	0.627106	0.741782	0.857018	1.02561	1.20212	1.4753	1.95415	2.82744	5.2674
0.0521195	0.107334	0.148005	0.190618	0.227021	0.266766	0.310156	0.359721	0.418943	0.484888	0.554653	0.62743	0.74259	0.8575	1.02701	1.20411	1.48032	1.95722	2.82932	5.27914
0.0521636	0.107346	0.14806	0.190788	0.227028	0.267033	0.310156	0.359758	0.418964	0.485384	0.554702	0.627442	0.743072	0.857705	1.02748	1.20499	1.48242	1.95749	2.8329	5.28704
0.0521775	0.107361	0.148108	0.190812	0.227129	0.267083	0.310156	0.360061	0.419009	0.485819	0.554852	0.627444	0.743424	0.858036	1.02912	1.20609	1.48287	1.9616	2.83477	5.30324
0.0521857	0.107549	0.148199	0.190931	0.227234	0.267119	0.310156	0.360063	0.419217	0.485849	0.555116	0.627472	0.743471	0.858163	1.02946	1.20651	1.48358	1.9616	2.8361	5.32
0.052239	0.10756	0.148395	0.191011	0.22728	0.267312	0.310156	0.360289	0.41932	0.485928	0.555551	0.62749	0.74363	0.859264	1.02963	1.20805	1.48457	1.96246	2.8406	5.33327
0.0523755	0.107565	0.148457	0.191301	0.227294	0.267432	0.310156	0.360529	0.419572	0.485943	0.556042	0.628523	0.74373	0.859299	1.03047	1.2086	1.48553	1.96891	2.8418	5.33878
0.0523791	0.10762	0.148479	0.19133	0.227319	0.267494	0.310156	0.360906	0.41966	0.485949	0.556199	0.62865	0.743733	0.859669	1.0306	1.21021	1.48709	1.96962	2.8428	5.3546
0.0524613	0.107685	0.148512	0.191371	0.227372	0.267786	0.310156	0.361097	0.419769	0.486495	0.556409	0.629043	0.744043	0.859778	1.03138	1.21035	1.48716	1.97279	2.84688	5.35781
0.052536	0.107764	0.148519	0.191523	0.227449	0.267813	0.310156	0.361118	0.420121	0.486518	0.556815	0.629152	0.7441	0.860366	1.03149	1.21174	1.48815	1.97281	2.84732	5.35796
0.0525738	0.107816	0.148543	0.191549	0.227461	0.267823	0.310156	0.361219	0.420128	0.486889	0.557017	0.629158	0.744141	0.860472	1.03241	1.21174	1.48828	1.97667	2.84935	5.35982
0.0526155	0.107824	0.148544	0.191591	0.227597	0.268131	0.310156	0.361337	0.420171	0.487273	0.557057	0.629226	0.744141	0.86159	1.03369	1.21174	1.48921	1.97671	2.84953	5.38244
0.0526584	0.107908	0.148553	0.191766	0.227616	0.268142	0.310156	0.36191	0.420193	0.48812	0.557304	0.629387	0.744141	0.861755	1.03509	1.21236	1.49149	1.97738	2.84981	5.38999
0.052679	0.10808	0.148785	0.191767	0.227798	0.268215	0.310156	0.36234	0.420227	0.488344	0.55744	0.629717	0.744141	0.861824	1.03573	1.21272	1.49194	1.97799	2.85142	5.40418
0.0526923	0.108094	0.148822	0.191794	0.227872	0.268359	0.310156	0.362881	0.420233	0.4885	0.557828	0.629786	0.744141	0.862557	1.03609	1.21426	1.49238	1.97995	2.85351	5.41231
0.0527346	0.108116	0.149026	0.191909	0.227996	0.268365	0.310156	0.363275	0.420254	0.488918	0.55821	0.629971	0.744141	0.86323	1.03655	1.21504	1.49304	1.98122	2.85355	5.41486
0.052778	0.10815	0.149098	0.191912	0.228026	0.26862	0.310156	0.363316	0.42028	0.488942	0.558314	0.631638	0.744141	0.863361	1.03664	1.21537	1.49388	1.98448	2.8631	5.42503
0.0528092	0.108169	0.149111	0.191915	0.228029	0.26878	0.310156	0.363346	0.420705	0.489217	0.558516	0.63192	0.744141	0.86359	1.03731	1.21792	1.49456	1.98466	2.87044	5.43215
0.0528127	0.1082	0.149235	0.191917	0.22847	0.268857	0.310156	0.363417	0.420842	0.489434	0.559137	0.632008	0.744141	0.86444	1.03906	1.2218	1.49597	1.98472	2.87506	5.45494
0.0528194	0.108207	0.149275	0.191967	0.228684	0.269025	0.310156	0.363637	0.421389	0.490076	0.559306	0.632251	0.744141	0.864546	1.03906	1.22211	1.49625	1.98543	2.87955	5.45651
0.0528312	0.108418	0.14939	0.192027	0.22876	0.269101	0.310156	0.363638	0.421416	0.490077	0.559767	0.632964	0.744549	0.865159	1.03906	1.22261	1.49824	1.98597	2.88079	5.46678
0.0529071	0.108485	0.149475	0.192067	0.228814	0.269152	0.310156	0.363861	0.421472	0.490147	0.559845	0.633412	0.744573	0.865849	1.03906	1.22328	1.49989	1.98597	2.88132	5.47129
0.0530161	0.108486	0.149489	0.192078	0.228832	0.269319	0.310156	0.364356	0.421521	0.49026	0.560007	0.633976	0.745026	0.865898	1.03906	1.22422	1.50129	1.98597	2.8914	5.4774
0.0530497	0.108517	0.149501	0.192082	0.228926	0.269406	0.310156	0.365236	0.421662	0.490569	0.560141	0.634089	0.74508	0.866096	1.03906	1.22458	1.50194	1.98597	2.90331	5.47953
0.0531019	0.108576	0.149621	0.192105	0.228996	0.269586	0.310156	0.365281	0.422197	0.490784	0.560417	0.634937	0.745134	0.866678	1.03906	1.22618	1.50198	1.98597	2.90937	5.5234
0.0531041	0.108586	0.149706	0.192277	0.229002	0.269824	0.310156	0.365396	0.422776	0.490803	0.560721	0.635887	0.745431	0.86799	1.03906	1.22653	1.50202	1.98597	2.91973	5.52867
0.0532137	0.108624	0.149922	0.192353	0.229032	0.269962	0.310156	0.365467	0.422865	0.490919	0.561344	0.635899	0.745592	0.869198	1.03906	1.22686	1.50382	1.99165	2.9209	5.54781
0.0532191	0.108696	0.149951	0.19236	0.229497	0.269987	0.310156	0.365725	0.423063	0.491349	0.561386	0.63627	0.745806	0.870328	1.03906	1.22789	1.50555	1.99624	2.92767	5.55395
0.0532425	0.108779	0.149961	0.192458	0.229502	0.269994	0.310156	0.365734	0.423617	0.491662	0.561454	0.636329	0.74614	0.87096	1.03906	1.22836	1.50623	1.99709	2.92814	5.59142
0.0532482	0.10884	0.150088	0.192621	0.229514	0.270104	0.310156	0.365975	0.423848	0.491929	0.562074	0.636723	0.7465	0.871299	1.03906	1.22939	1.50745	1.99982	2.92817	5.59552
0.0533618	0.108913	0.150112	0.192701	0.22971	0.27016	0.310156	0.36615	0.423851	0.491954	0.562111	0.637311	0.746593	0.871437	1.03906	1.22948	1.50881	2.00375	2.93735	5.59552
0.0533793	0.108959	0.150153	0.192717	0.230011	0.270162	0.310156	0.366171	0.424258	0.492249	0.562502	0.637428	0.747126	0.871591	1.03906	1.23045	1.5125	2.00493	2.9396	5.6489
0.0534367	0.108986	0.150193	0.192798	0.23002	0.270223	0.310156	0.366313	0.424657	0.492263	0.562546	0.638479	0.748961	0.871664	1.03906	1.23055	1.51387	2.00847	2.94006	5.65597
0.053659	0.108994	0.150312	0.192881	0.230073	0.270298	0.310156	0.366426	0.424932	0.492304	0.562868	0.638667	0.749158	0.872109	1.04205	1.23082	1.51431	2.0147	2.94282	5.65634
0.0536722	0.109	0.150441	0.192973	0.230248	0.270298	0.310156	0.366575	0.425186	0.492671	0.563379	0.638823	0.749279	0.872477	1.04309	1.23387	1.51524	2.01545	2.9456	5.73667
0.0537873	0.109048	0.150499	0.193029	0.230265	0.270496	0.310156	0.366595	0.425256	0.492955	0.563656	0.638859	0.749279	0.873745	1.04332	1.23484	1.51604	2.01717	2.94946	5.76081
0.0538232	0.109065	0.150572	0.19313	0.230287	0.27071	0.310277	0.36663	0.425653	0.493263	0.56424	0.639191	0.749279	0.873889	1.04409	1.23583	1.51662	2.01848	2.95089	5.79478
0.054006	0.109066	0.150591	0.193193	0.23045	0.270875	0.310349	0.366732	0.426452	0.493302	0.564399	0.639491	0.749279	0.874618	1.04526	1.2363	1.51759	2.0224	2.95853	5.79836
0.0540247	0.109277	0.150629	0.193218	0.230565	0.270922	0.310421	0.366757	0.426813	0.493559	0.564833	0.639517	0.749279	0.875518	1.04685	1.23798	1.51939	2.02261	2.96348	5.82393
0.0540888	0.109334	0.150745	0.193299	0.230579	0.271087	0.310442	0.366867	0.426921	0.494351	0.564838	0.639672	0.749279	0.875745	1.04805	1.23822	1.52202	2.02349	2.96676	5.88713
0.0541535	0.109435	0.150809	0.193446	0.230667	0.271503	0.310466	0.367178	0.427049	0.494462	0.565017	0.639782	0.749279	0.877758	1.04877	1.23881	1.52307	2.02355	2.96806	5.93374
0.0542064	0.109484	0.150911	0.193567	0.230809	0.271625	0.310549	0.367381	0.427338	0.494552	0.565124	0.63987	0.749279	0.877983	1.04904	1.23917	1.52528	2.0268	2.98172	5.96345
0.0542135	0.109487	0.151	0.193679	0.230827	0.271892	0.310591	0.367451	0.427565	0.494901	0.565587	0.640112	0.749279	0.878341	1.04917	1.23973	1.52559	2.03388	2.98667	6.02341
0.0543016	0.109569	0.15102	0.193704	0.230832	0.271957	0.310594	0.36761	0.427767	0.495559	0.565989	0.640122	0.749279	0.880088	1.04983	1.24023	1.52784	2.03437	2.98688	6.04412
0.0543272	0.109603	0.151082	0.193815	0.230839	0.271958	0.310615	0.367762	0.42801	0.49597	0.566361	0.640367	0.749279	0.881301	1.04987	1.24023	1.53034	2.04507	2.98912	6.05872
0.0543344	0.109652	0.151491	0.193849	0.230922	0.272079	0.31068	0.367793	0.428024	0.496094	0.566752	0.640416	0.749279	0.881443	1.05023	1.24023	1.53142	2.04655	2.99021	6.05989
0.0543962	0.109713	0.151494	0.193861	0.230934	0.272373	0.310877	0.367921	0.42811	0.496094	0.566887	0.640904	0.749279	0.881674	1.05076	1.24023	1.53542	2.04979	2.99212	6.10169
0.054445	0.109757	0.151521	0.193917	0.230946	0.272532	0.31109	0.368029	0.428412	0.496094	0.566963	0.641165	0.749279	0.882281	1.0509	1.24023	1.53832	2.05181	2.99542	6.13087
0.0544463	0.109762	0.151528	0.193919	0.231035	0.272535	0.311182	0.368043	0.428776	0.496094	0.566977	0.642532	0.750425	0.882839	1.05131	1.24023	1.53908	2.0534	2.99716	6.18211
0.0544469	0.109766	0.151537	0.193948	0.231156	0.272567	0.311274	0.368163	0.428789	0.496094	0.56732	0.642671	0.751083	0.882889	1.05236	1.24023	1.54324	2.05435	2.99811	6.18345
0.0544723	0.109778	0.151795	0.193974	0.231325	0.272901	0.311663	0.368667	0.428913	0.496094	0.567557	0.642791	0.751612	0.883549	1.05237	1.24023	1.54529	2.05548	2.9983	6.21858
0.0545155	0.109812	0.151827	0.194202	0.231431	0.273227	0.311737	0.36872	0.428933	0.496094	0.567633	0.643925	0.751884	0.883937	1.05237	1.24023	1.54636	2.05671	2.99842	6.23438
0.0545654	0.109886	0.151836	0.194284	0.231442	0.27328	0.311758	0.368999	0.42965	0.496094	0.568153	0.643935	0.752062	0.884627	1.05362	1.24023	1.55014	2.05727	3.00114	6.24566
0.0546272	0.109971	0.15184	0.194312	0.231448	0.273301	0.311867	0.369	0.429896	0.496094	0.568404	0.644069	0.752084	0.884947	1.05373	1.24023	1.55078	2.05753	3.00128	6.30768
0.0546358	0.110033	0.151931	0.194427	0.23157	0.273324	0.311955	0.36911	0.429988	0.496094	0.568417	0.644714	0.752238	0.88503	1.05379	1.24023	1.55078	2.05889	3.00494	6.30822
0.0547645	0.110082	0.152006	0.194514	0.231861	0.274089	0.312081	0.369533	0.430228	0.496094	0.568555	0.644886	0.752299	0.885048	1.05387	1.24023	1.55078	2.05949	3.00638	6.3701
0.0547862	0.110099	0.152264	0.194522	0.232007	0.274386	0.312171	0.36969	0.430475	0.496094	0.568878	0.645481	0.752719	0.885277	1.05392	1.24024	1.55078	2.06146	3.01104	6.38681
0.0547889	0.110174	0.152574	0.194532	0.232053	0.274565	0.312238	0.369727	0.430487	0.496094	0.568967	0.645524	0.752819	0.887022	1.05418	1.24062	1.55078	2.0669	3.01374	6.44101
0.0548158	0.110202	0.152693	0.194553	0.232192	0.274936	0.312463	0.36988	0.430594	0.496094	0.56901	0.645824	0.752958	0.887045	1.0547	1.24062	1.55078	2.06939	3.01646	6.6008
0.0548862	0.110221	0.152787	0.194743	0.232214	0.275056	0.312467	0.369921	0.430838	0.496094	0.569403	0.645927	0.753134	0.887388	1.05503	1.24063	1.55078	2.07096	3.01979	6.7193
0.0548925	0.110228	0.152801	0.195029	0.232287	0.275087	0.312476	0.369969	0.430881	0.496094	0.570835	0.646199	0.753348	0.889355	1.05529	1.24063	1.55078	2.07144	3.01984	6.74251
0.0549443	0.110331	0.152907	0.195052	0.232423	0.275136	0.312862	0.370134	0.430955	0.496094	0.570881	0.646258	0.753548	0.889419	1.05543	1.24063	1.55078	2.07193	3.02051	6.77275
0.0549838	0.11055	0.15293	0.195353	0.232453	0.275404	0.313195	0.370219	0.430998	0.496094	0.57125	0.646292	0.753697	0.890615	1.0555	1.24063	1.55078	2.07428	3.02702	6.78133
0.0550175	0.110647	0.152983	0.195385	0.232617	0.275996	0.313325	0.370449	0.431094	0.496094	0.571543	0.646727	0.754345	0.891114	1.05566	1.24063	1.55078	2.07706	3.02849	6.81201
0.0550575	0.110681	0.153044	0.195417	0.232782	0.276124	0.313642	0.37049	0.431131	0.496094	0.571738	0.646799	0.754458	0.891133	1.05568	1.24063	1.55078	2.07761	3.02918	6.82773
0.0551488	0.110683	0.15305	0.195478	0.232954	0.276194	0.313661	0.370715	0.431216	0.496094	0.57198	0.647012	0.754596	0.89325	1.05576	1.24063	1.55078	2.07779	3.03609	6.90931
0.0551903	0.110704	0.153104	0.195611	0.233223	0.276254	0.313721	0.370716	0.431256	0.496094	0.572742	0.647087	0.754703	0.893713	1.05613	1.2408	1.55165	2.07822	3.03746	6.9132
0.0551938	0.110722	0.153216	0.195656	0.233422	0.276419	0.313906	0.370718	0.43192	0.496094	0.572892	0.647229	0.754862	0.89396	1.05735	1.24567	1.55287	2.08092	3.03802	6.9311
0.0553429	0.110753	0.153219	0.195683	0.233463	0.276544	0.314018	0.37073	0.431924	0.496155	0.573116	0.647253	0.754947	0.894346	1.05895	1.24587	1.55486	2.08493	3.04691	6.93443
0.0554084	0.110775	0.153229	0.195716	0.233604	0.276645	0.31404	0.370732	0.43194	0.497152	0.573486	0.647326	0.755802	0.894346	1.05922	1.24628	1.55649	2.09023	3.05064	6.94456
0.055474	0.110855	0.153259	0.195862	0.233628	0.276893	0.314505	0.371098	0.431971	0.497177	0.574187	0.647691	0.755869	0.894346	1.05953	1.24793	1.56106	2.09043	3.05608	6.95296
0.0555319	0.110966	0.153333	0.19594	0.233668	0.276905	0.314566	0.371104	0.43202	0.497243	0.574221	0.647733	0.756101	0.894346	1.05964	1.24887	1.56176	2.09093	3.06817	6.97191
0.0555805	0.110974	0.153418	0.196137	0.23372	0.276979	0.314589	0.371108	0.432199	0.497282	0.574628	0.648631	0.756609	0.894607	1.05964	1.24981	1.56246	2.09212	3.06901	6.98597
0.0557708	0.111001	0.153458	0.196142	0.233762	0.277183	0.314709	0.371268	0.432317	0.497434	0.574703	0.648968	0.756756	0.894668	1.05964	1.2501	1.56272	2.09239	3.07178	7.04939
0.0557723	0.111038	0.153493	0.196344	0.233872	0.277184	0.315035	0.37128	0.432342	0.497571	0.574727	0.649137	0.756816	0.896165	1.05964	1.2523	1.564	2.09289	3.0764	7.10022
0.0558166	0.111273	0.15358	0.196429	0.234172	0.277346	0.315066	0.371406	0.432786	0.497603	0.574886	0.649549	0.757019	0.896456	1.05964	1.25256	1.5653	2.09346	3.07672	7.20195
0.0558556	0.1113	0.153678	0.196603	0.234193	0.277391	0.31509	0.37145	0.432898	0.497748	0.575074	0.649957	0.757802	0.89716	1.05964	1.25275	1.56659	2.09433	3.07984	7.24855
0.0558955	0.111413	0.153749	0.196679	0.234254	0.277404	0.315217	0.3715	0.433177	0.497944	0.575255	0.649983	0.758135	0.897453	1.05964	1.25275	1.56879	2.09448	3.08506	7.26146
0.0559419	0.111454	0.153781	0.196685	0.234397	0.277481	0.315524	0.371547	0.433229	0.498034	0.57599	0.650106	0.759289	0.897905	1.05966	1.25439	1.56986	2.09553	3.09252	7.3437
0.055949	0.111522	0.153822	0.196715	0.234548	0.277537	0.315789	0.37164	0.433336	0.498367	0.576318	0.650458	0.759526	0.898139	1.05974	1.25448	1.57198	2.09568	3.09534	7.36851
0.0559553	0.111536	0.153826	0.196811	0.234777	0.277647	0.315892	0.371645	0.43356	0.498598	0.576341	0.650779	0.759919	0.898437	1.06004	1.25462	1.57526	2.10233	3.10156	7.42015
0.0560141	0.111674	0.153919	0.196823	0.234871	0.277917	0.316031	0.371675	0.433881	0.498704	0.576373	0.650843	0.760222	0.89882	1.06016	1.25659	1.57545	2.10311	3.10156	7.44582
0.0562309	0.111757	0.153948	0.196853	0.235121	0.278028	0.316511	0.372189	0.4339	0.499006	0.576422	0.65106	0.760529	0.900034	1.06114	1.25867	1.57679	2.10882	3.10296	7.49989
0.0562543	0.111765	0.154008	0.197011	0.235123	0.278047	0.316648	0.372251	0.434198	0.499381	0.577286	0.651816	0.760675	0.900196	1.06279	1.25946	1.57705	2.11162	3.10653	7.53809
0.056309	0.111895	0.154219	0.197095	0.235279	0.278213	0.316708	0.372289	0.434433	0.499846	0.578015	0.652673	0.760982	0.900972	1.06289	1.25975	1.57768	2.11203	3.10794	7.54405
0.056379	0.111973	0.154246	0.197207	0.235318	0.278264	0.316813	0.372429	0.434753	0.499958	0.578239	0.652685	0.761146	0.90262	1.06327	1.25981	1.57779	2.11211	3.10849	7.78883
0.056389	0.111988	0.154398	0.197353	0.235568	0.27862	0.316896	0.372562	0.434868	0.499967	0.578246	0.65278	0.761314	0.902773	1.06432	1.26108	1.58061	2.11742	3.11528	7.78883
0.056545	0.112006	0.154418	0.19744	0.235604	0.278724	0.317	0.37295	0.435866	0.500882	0.578857	0.652973	0.761761	0.902782	1.06447	1.26163	1.58149	2.12215	3.11703	7.78883
0.0565559	0.112009	0.154529	0.197465	0.235633	0.278781	0.317011	0.372972	0.436184	0.501008	0.578891	0.653545	0.761768	0.903116	1.06607	1.2648	1.58149	2.12221	3.11719	7.78883
0.0565812	0.112049	0.154607	0.198	0.235743	0.278831	0.317022	0.373032	0.436318	0.501098	0.578963	0.654627	0.761888	0.905415	1.06672	1.2648	1.58149	2.12676	3.11719	7.82649
0.0566373	0.11205	0.154682	0.198202	0.23575	0.279052	0.317109	0.373319	0.436584	0.501252	0.579111	0.654925	0.762747	0.905639	1.06739	1.2648	1.58391	2.12997	3.12258	7.86272
0.0568256	0.112069	0.154834	0.1983	0.235831	0.279053	0.317257	0.373609	0.436786	0.501407	0.579189	0.655376	0.762765	0.905736	1.06781	1.2648	1.58762	2.13059	3.12606	7.90746
0.0568587	0.112197	0.155027	0.19833	0.235841	0.279066	0.317383	0.373956	0.437063	0.501469	0.579835	0.655767	0.762906	0.905856	1.06822	1.2648	1.58827	2.13263	3.12786	7.93786
0.0568685	0.112235	0.155078	0.198335	0.236022	0.279539	0.317458	0.374576	0.437506	0.501561	0.579844	0.655834	0.763144	0.906502	1.06834	1.2648	1.58827	2.13335	3.13065	8.20053
0.056877	0.112326	0.155242	0.198388	0.236086	0.279654	0.317641	0.374872	0.437572	0.501638	0.579845	0.657161	0.763307	0.907029	1.07014	1.2648	1.58827	2.13378	3.14613	8.23591
0.0569054	0.112588	0.155428	0.198433	0.23612	0.279777	0.317792	0.375115	0.437688	0.501647	0.579996	0.657161	0.763404	0.907619	1.07052	1.2648	1.58827	2.13378	3.15159	8.26812
0.0569172	0.112622	0.155528	0.198645	0.236173	0.27981	0.318008	0.375218	0.437877	0.501678	0.58056	0.657161	0.763412	0.908148	1.07055	1.26753	1.58827	2.13378	3.15465	8.27731
0.0569192	0.112648	0.155561	0.198907	0.23626	0.279899	0.31841	0.3754	0.437887	0.501678	0.580568	0.657161	0.763849	0.908662	1.0712	1.26848	1.58827	2.13417	3.15997	8.31131
0.0569354	0.112675	0.155571	0.198936	0.23629	0.279992	0.318465	0.37581	0.438133	0.501717	0.580716	0.657161	0.764093	0.908983	1.07162	1.26981	1.58827	2.13583	3.16222	8.31515
0.0569658	0.112687	0.155591	0.19903	0.236359	0.280149	0.318719	0.37593	0.438135	0.501738	0.581222	0.657161	0.764357	0.909324	1.07235	1.27048	1.58868	2.13633	3.16474	8.33191
0.0570138	0.112696	0.155766	0.199161	0.236418	0.280411	0.318835	0.375945	0.438424	0.501768	0.581253	0.657161	0.764977	0.909831	1.07306	1.27058	1.59036	2.13929	3.16732	8.33325
0.0570261	0.11277	0.155972	0.199181	0.236439	0.281232	0.318866	0.376045	0.43843	0.50203	0.581484	0.657161	0.765872	0.911166	1.07332	1.27064	1.59052	2.14226	3.17202	8.38479
0.0570273	0.112841	0.156156	0.199316	0.236518	0.281298	0.318913	0.376093	0.438627	0.502288	0.58154	0.657161	0.766534	0.912493	1.07336	1.27077	1.59196	2.14379	3.17266	8.39537
0.0570333	0.112908	0.15633	0.199387	0.236888	0.281391	0.319049	0.376207	0.438627	0.502292	0.581706	0.657161	0.766574	0.913772	1.07379	1.27185	1.59275	2.14381	3.18248	8.44076
0.0570367	0.11293	0.156335	0.1994	0.237172	0.281634	0.319057	0.376382	0.438627	0.502398	0.582252	0.657161	0.766699	0.913878	1.07387	1.27244	1.59357	2.14418	3.18333	8.46423
0.0572806	0.112949	0.156441	0.199416	0.237209	0.281643	0.319341	0.376395	0.438627	0.502829	0.582944	0.657161	0.767314	0.91394	1.0741	1.27253	1.59387	2.14444	3.1837	8.51697
0.0572909	0.113015	0.15664	0.199452	0.237338	0.281822	0.319462	0.376647	0.438627	0.503116	0.582963	0.657886	0.767534	0.913988	1.07419	1.27292	1.59869	2.14464	3.18574	8.55923
0.0573059	0.113064	0.156709	0.199557	0.237582	0.28202	0.319808	0.376682	0.438627	0.503523	0.583002	0.658251	0.768345	0.914071	1.07528	1.27351	1.60077	2.14574	3.19002	8.75436
0.0573317	0.113075	0.156724	0.199681	0.237619	0.282081	0.320519	0.377211	0.438627	0.503676	0.583267	0.659361	0.768381	0.914412	1.07618	1.27408	1.60112	2.14689	3.19415	8.85574
0.0573353	0.113135	0.156934	0.199949	0.237637	0.282098	0.320813	0.377275	0.438627	0.503777	0.584669	0.659997	0.769265	0.91447	1.07679	1.27495	1.6016	2.15041	3.19641	10.8349
0.0573483	0.11316	0.156996	0.200045	0.237962	0.282099	0.321057	0.377284	0.438627	0.504229	0.584671	0.660103	0.769688	0.914839	1.07798	1.27582	1.6027	2.15116	3.20124	10.8349
0.0573784	0.113165	0.157107	0.200164	0.237964	0.282243	0.321236	0.377316	0.438627	0.50439	0.58515	0.660392	0.770224	0.915118	1.0783	1.27749	1.60324	2.1577	3.20143	11.1428
0.0573895	0.113199	0.157258	0.200264	0.237983	0.282268	0.32126	0.377336	0.438674	0.504473	0.585692	0.66055	0.770929	0.915657	1.0791	1.27805	1.61279	2.15872	3.20595	11.3127
0.0574121	0.113211	0.157259	0.200369	0.238146	0.282274	0.321377	0.377644	0.438962	0.504594	0.585781	0.660872	0.770933	0.916792	1.07918	1.2782	1.61302	2.1623	3.2088	11.7659
0.0574486	0.113224	0.157731	0.200615	0.238157	0.282288	0.321681	0.377921	0.439399	0.504777	0.585957	0.660967	0.771123	0.91709	1.07978	1.27825	1.61402	2.16381	3.22373	12.0322
0.0575065	0.113227	0.157741	0.200781	0.23817	0.282754	0.321692	0.377929	0.439609	0.50507	0.586005	0.661672	0.771283	0.917112	1.08252	1.27845	1.615	2.16541	3.22461	12.1947
0.057541	0.113317	0.157752	0.200961	0.238273	0.282834	0.321707	0.377945	0.439704	0.505486	0.587332	0.661766	0.771328	0.918521	1.08274	1.27881	1.61628	2.16611	3.22461	12.1947
0.0575621	0.11351	0.157765	0.201044	0.238415	0.282939	0.321714	0.378041	0.440061	0.505522	0.587553	0.662789	0.771428	0.918544	1.08334	1.27881	1.61774	2.17017	3.22461	12.2174
0.0575769	0.11352	0.157796	0.201088	0.238481	0.28299	0.322013	0.378578	0.44007	0.505829	0.58758	0.662798	0.772105	0.918797	1.0835	1.27881	1.61779	2.17152	3.22461	12.2174
0.0575867	0.113541	0.157844	0.201173	0.238485	0.283041	0.322262	0.37888	0.440206	0.505921	0.587783	0.662851	0.772318	0.921359	1.08392	1.27881	1.61841	2.17385	3.22461	12.2451
0.0576025	0.113605	0.157863	0.201357	0.238541	0.2831	0.322376	0.379036	0.440235	0.506037	0.587783	0.66293	0.772564	0.921841	1.08404	1.27907	1.61866	2.17423	3.22846	12.442
0.0576444	0.113706	0.158051	0.20136	0.238731	0.283402	0.322435	0.379429	0.440284	0.506068	0.587783	0.663299	0.772684	0.922252	1.08638	1.28115	1.62323	2.18783	3.22916	12.442
0.0576649	0.11381	0.158083	0.201544	0.238802	0.283467	0.32257	0.379618	0.440328	0.506137	0.587783	0.663667	0.772744	0.923047	1.08765	1.28209	1.62773	2.18811	3.23367	12.4642
0.0577608	0.114134	0.158092	0.20162	0.238887	0.283574	0.322715	0.379941	0.440404	0.506154	0.587783	0.664966	0.773027	0.923085	1.08782	1.28297	1.6298	2.18896	3.23414	12.5135
0.057768	0.114135	0.158301	0.201648	0.238946	0.284082	0.323111	0.379985	0.440477	0.506505	0.587783	0.665172	0.773638	0.925814	1.08786	1.28548	1.63072	2.1912	3.2361	12.6989
0.0578344	0.114214	0.158323	0.201758	0.238992	0.28412	0.323141	0.380245	0.440582	0.506844	0.587812	0.665462	0.773714	0.925985	1.08858	1.28618	1.63077	2.19314	3.23788	12.769
0.057838	0.114489	0.158429	0.202136	0.239082	0.284307	0.323177	0.380472	0.440776	0.506862	0.587998	0.665576	0.774484	0.926464	1.08926	1.28779	1.63694	2.19314	3.24299	12.8459
0.0579357	0.114522	0.158504	0.202191	0.239086	0.284377	0.32321	0.380479	0.440792	0.506892	0.588578	0.665638	0.774589	0.927152	1.0905	1.29029	1.63718	2.19314	3.24614	15.7837
0.058006	0.114641	0.158515	0.202372	0.239174	0.284432	0.323298	0.381348	0.440797	0.507175	0.588842	0.665687	0.774711	0.927485	1.09145	1.29139	1.64804	2.19314	3.24632	15.8769
0.0580746	0.114723	0.158558	0.202381	0.239323	0.284471	0.323388	0.381405	0.440879	0.507496	0.588975	0.665888	0.775067	0.927704	1.09275	1.29239	1.64824	2.19314	3.24673	15.9098
0.058097	0.11474	0.15857	0.202489	0.239551	0.28476	0.323473	0.381541	0.44116	0.507498	0.588987	0.665918	0.776106	0.927813	1.0931	1.29247	1.64856	2.19314	3.24732	16.0331
0.0582799	0.114789	0.158582	0.202536	0.239616	0.284827	0.323675	0.381706	0.441296	0.507807	0.589104	0.66648	0.77611	0.928431	1.09383	1.29517	1.65089	2.19314	3.26255	16.2504
0.0583248	0.114885	0.158598	0.202567	0.239939	0.285184	0.323766	0.381768	0.441478	0.50801	0.589253	0.666745	0.776114	0.928967	1.09405	1.29781	1.65156	2.19314	3.26604	16.3127
0.0583413	0.114886	0.158637	0.20266	0.240183	0.285414	0.323788	0.381777	0.441574	0.50826	0.589348	0.667116	0.776288	0.929366	1.09428	1.29909	1.6586	2.19314	3.26988	16.5133
0.0583539	0.114902	0.158647	0.202692	0.240207	0.285439	0.323958	0.382117	0.441805	0.508795	0.589628	0.667512	0.776476	0.929366	1.0943	1.29963	1.65872	2.19314	3.27144	16.5821
0.0584175	0.11492	0.158665	0.202745	0.240315	0.285611	0.324113	0.382125	0.441919	0.509274	0.589879	0.667524	0.777158	0.929366	1.0946	1.29973	1.65952	2.19357	3.27154	16.6487
0.0584236	0.114944	0.15868	0.202756	0.240411	0.285635	0.324129	0.382436	0.442041	0.50928	0.590149	0.667935	0.777209	0.929973	1.09482	1.30034	1.66126	2.19791	3.27885	16.9853
0.0584619	0.114945	0.158769	0.202863	0.240455	0.285699	0.324348	0.382668	0.442221	0.510159	0.590345	0.668137	0.777688	0.930242	1.09513	1.3016	1.66199	2.20262	3.28127	16.9926
0.0584766	0.115078	0.158836	0.202879	0.240599	0.285821	0.324367	0.382941	0.442261	0.510215	0.590487	0.66828	0.778197	0.930469	1.09524	1.30344	1.66229	2.20292	3.2858	17.0648
0.0585072	0.115216	0.158932	0.203091	0.24076	0.285834	0.324454	0.38301	0.442299	0.510654	0.591045	0.668332	0.778407	0.930469	1.09524	1.30358	1.66244	2.21789	3.2858	17.1995
0.0585104	0.115299	0.158955	0.203113	0.240783	0.28596	0.324539	0.383084	0.442421	0.510961	0.591155	0.669056	0.778442	0.930469	1.09596	1.30443	1.6625	2.22187	3.28635	17.2745
0.0586402	0.115353	0.159076	0.20314	0.241114	0.285999	0.324547	0.383139	0.442719	0.511162	0.591277	0.669163	0.779131	0.930469	1.09723	1.30456	1.66331	2.22201	3.30275	17.2745
0.0586652	0.11547	0.159166	0.20317	0.241184	0.286111	0.324608	0.383185	0.442756	0.511196	0.591542	0.669593	0.779159	0.930469	1.09777	1.30609	1.66395	2.22752	3.32753	17.2745
0.0586888	0.115485	0.159171	0.203203	0.241389	0.286542	0.32465	0.383193	0.442769	0.511246	0.592112	0.669618	0.779735	0.930469	1.09804	1.30731	1.66398	2.23109	3.34207	17.2745
0.0587338	0.115506	0.159218	0.203265	0.241404	0.286545	0.324755	0.383473	0.442821	0.5113	0.592181	0.669718	0.780683	0.930469	1.09816	1.30797	1.66482	2.23242	3.343	17.3225
0.0587373	0.115513	0.159221	0.203351	0.241504	0.286571	0.3248	0.383773	0.443359	0.511538	0.592249	0.669766	0.780719	0.930469	1.09933	1.309	1.66684	2.23341	3.34664	17.4851
0.058811	0.115518	0.159385	0.203367	0.24152	0.28661	0.324903	0.384245	0.443451	0.511701	0.592341	0.66987	0.781018	0.930469	1.09975	1.31012	1.66713	2.23518	3.35268	17.6602
0.0588339	0.115525	0.159514	0.20345	0.241597	0.28674	0.324972	0.384345	0.443758	0.51212	0.592363	0.670418	0.781543	0.930469	1.10107	1.31414	1.66795	2.23578	3.35702	17.8766
0.0588423	0.115528	0.159857	0.203558	0.241648	0.286887	0.325061	0.38436	0.443884	0.512252	0.592377	0.670697	0.782272	0.930469	1.10118	1.31442	1.66866	2.23776	3.35731	18.0938
0.058876	0.115557	0.160102	0.203567	0.241653	0.286895	0.325183	0.384706	0.443887	0.512336	0.592462	0.671043	0.78357	0.930469	1.10438	1.31471	1.67024	2.23791	3.36017	18.1956
0.0589138	0.115562	0.160287	0.203649	0.241814	0.287053	0.325209	0.384921	0.443892	0.5124	0.592908	0.67114	0.78358	0.930469	1.10495	1.31509	1.67024	2.239	3.36926	18.3118
0.0589676	0.115676	0.160504	0.203668	0.241846	0.287124	0.325335	0.384927	0.444036	0.512551	0.593137	0.671226	0.784273	0.930556	1.10525	1.31588	1.67024	2.2412	3.37183	18.3118
0.0590783	0.115759	0.160524	0.203756	0.241849	0.287131	0.325421	0.384945	0.444152	0.51259	0.593539	0.671533	0.784393	0.930643	1.10601	1.31588	1.67024	2.24722	3.37756	18.4157
0.0591448	0.115853	0.160558	0.203831	0.241852	0.287164	0.325674	0.385117	0.44435	0.513254	0.593924	0.671865	0.784393	0.931207	1.10644	1.31588	1.67024	2.25144	3.37964	18.8581
0.059247	0.115857	0.160753	0.203866	0.241873	0.287257	0.325804	0.385202	0.444395	0.513353	0.594119	0.672037	0.784393	0.931305	1.10735	1.31588	1.67258	2.2531	3.38294	19.196
0.0593151	0.11587	0.160839	0.204057	0.24194	0.287355	0.325813	0.385474	0.444472	0.513464	0.594268	0.672198	0.784393	0.931436	1.10789	1.31621	1.67484	2.25358	3.39037	19.4839
0.0593222	0.116331	0.160851	0.2042	0.241956	0.287719	0.325837	0.385643	0.444976	0.51369	0.594341	0.672365	0.784393	0.932171	1.10881	1.31744	1.67486	2.25358	3.3915	19.5438
0.0594042	0.116346	0.160899	0.204265	0.242067	0.288009	0.325891	0.385797	0.445197	0.513769	0.594548	0.672439	0.786755	0.932278	1.10886	1.31916	1.67544	2.25358	3.39192	19.6725
0.0594476	0.116352	0.160952	0.20429	0.242128	0.28844	0.325985	0.385924	0.445197	0.513835	0.59459	0.672529	0.786785	0.932409	1.1093	1.31919	1.67544	2.2559	3.39256
0.0595748	0.116417	0.160983	0.204344	0.242192	0.288955	0.325996	0.385955	0.44523	0.514113	0.594606	0.673313	0.788066	0.932615	1.1093	1.31925	1.67544	2.2659	3.39616
0.0595829	0.116439	0.161063	0.20436	0.242295	0.289127	0.326102	0.386011	0.445237	0.514147	0.595619	0.673606	0.789033	0.932727	1.1093	1.32079	1.67562	2.26759	3.39747
0.0595954	0.11644	0.161135	0.204388	0.242485	0.289254	0.326163	0.386081	0.445495	0.514455	0.595827	0.674414	0.789137	0.93318	1.10942	1.32097	1.67674	2.27424	3.40219
0.0596939	0.116493	0.161158	0.204414	0.242506	0.289389	0.326166	0.386271	0.445779	0.515139	0.595857	0.674879	0.789233	0.93511	1.11012	1.32103	1.67726	2.27562	3.40236
0.0597062	0.116513	0.161547	0.20443	0.242549	0.289392	0.326501	0.386686	0.445945	0.515368	0.596033	0.674954	0.790041	0.935563	1.1106	1.32528	1.67967	2.28594	3.40406
0.0598356	0.116617	0.161731	0.204833	0.242662	0.289425	0.326802	0.386784	0.446091	0.51548	0.5961	0.675102	0.79046	0.935968	1.11081	1.32529	1.68118	2.28688	3.40609
0.0598602	0.116691	0.161776	0.204847	0.242779	0.2896	0.326896	0.387655	0.446483	0.515645	0.596649	0.675432	0.79046	0.936174	1.11102	1.32572	1.68167	2.28788	3.40817
0.0599558	0.116747	0.161888	0.204935	0.242828	0.289749	0.326991	0.387825	0.447113	0.515862	0.596846	0.675624	0.790539	0.938418	1.11168	1.32615	1.68403	2.28955	3.41554
0.0599776	0.116829	0.162035	0.20495	0.242841	0.28983	0.327011	0.387881	0.447223	0.516232	0.596905	0.675676	0.790563	0.939313	1.11289	1.32766	1.68481	2.29143	3.41574
0.0599777	0.116843	0.16205	0.205091	0.242934	0.290027	0.327138	0.387882	0.447234	0.516714	0.596909	0.676011	0.790658	0.940467	1.11311	1.32884	1.6861	2.29227	3.41606
0.060016	0.116932	0.162075	0.205137	0.243	0.290052	0.327201	0.387958	0.447601	0.516742	0.597205	0.676774	0.790684	0.940615	1.11441	1.32986	1.69108	2.2994	3.41769
0.0600718	0.116935	0.162198	0.205204	0.243127	0.290063	0.327428	0.388198	0.447673	0.516828	0.598166	0.677454	0.790876	0.941731	1.1157	1.33065	1.69292	2.30351	3.42929
0.0601446	0.117038	0.162272	0.205372	0.243131	0.290139	0.328012	0.388348	0.447864	0.517204	0.598685	0.677518	0.791431	0.942224	1.11653	1.33065	1.69414	2.30502	3.43823
0.0601514	0.117053	0.162275	0.205377	0.243181	0.290362	0.328102	0.388365	0.447937	0.517287	0.599258	0.677847	0.792105	0.942509	1.11659	1.33065	1.69771	2.30622	3.45112
0.0601553	0.117066	0.162447	0.20543	0.243185	0.290406	0.328157	0.388963	0.448176	0.517429	0.599458	0.677969	0.792547	0.942964	1.11716	1.33065	1.69992	2.30957	3.45489
0.0601583	0.117079	0.162458	0.205517	0.243233	0.290972	0.328323	0.389027	0.448454	0.517603	0.599878	0.677995	0.792713	0.943371	1.11826	1.33463	1.70099	2.31298	3.45489
0.0601745	0.117196	0.162512	0.205741	0.243276	0.291185	0.328388	0.389064	0.448523	0.517925	0.599891	0.678702	0.792975	0.94401	1.11828	1.33577	1.70192	2.31803	3.45971
0.0601876	0.117215	0.162597	0.205895	0.243316	0.291374	0.328455	0.389105	0.448719	0.518238	0.600007	0.678774	0.793492	0.94513	1.11828	1.33577	1.70264	2.32129	3.46349
0.0602071	0.117286	0.16266	0.205958	0.24335	0.291514	0.328975	0.38937	0.449185	0.518447	0.600289	0.679857	0.793526	0.945908	1.11873	1.33577	1.70305	2.32519	3.46765
0.0602255	0.117322	0.162693	0.206046	0.243363	0.291641	0.329122	0.389376	0.449231	0.51858	0.600395	0.680026	0.793895	0.946165	1.1191	1.33577	1.70374	2.32718	3.46765
0.0602265	0.117532	0.162817	0.206143	0.243373	0.291658	0.329325	0.389378	0.449308	0.519977	0.600472	0.680051	0.794564	0.946817	1.1191	1.33577	1.7039	2.32718	3.47246
0.0602536	0.117533	0.162867	0.206673	0.243418	0.291677	0.32941	0.389403	0.449457	0.520232	0.600516	0.680243	0.795646	0.946954	1.1191	1.33577	1.70634	2.33753	3.47266
0.0603031	0.117553	0.163069	0.207145	0.243491	0.291747	0.329435	0.389431	0.449733	0.520239	0.600776	0.68077	0.796739	0.946998	1.1191	1.33577	1.70687	2.34007	3.47266
0.0603239	0.117567	0.16307	0.207179	0.243802	0.291757	0.329545	0.389508	0.449793	0.520264	0.601055	0.680891	0.797189	0.947885	1.1191	1.33577	1.70707	2.34007	3.4815
0.0603511	0.117616	0.163156	0.207206	0.243909	0.29184	0.330015	0.389514	0.449925	0.521566	0.601571	0.681331	0.797683	0.947886	1.11939	1.33577	1.70804	2.34007	3.49391
0.0603692	0.117681	0.163228	0.20722	0.243938	0.291865	0.330103	0.38962	0.449982	0.521576	0.601877	0.682126	0.79775	0.949628	1.1196	1.33756	1.70903	2.34377	3.50858
0.0604039	0.117735	0.163241	0.207222	0.243979	0.291907	0.330115	0.389796	0.450051	0.521665	0.601908	0.682437	0.79804	0.949644	1.1203	1.33892	1.71167	2.34441	3.51397
0.0604467	0.117752	0.163244	0.207303	0.244147	0.292046	0.330212	0.389885	0.45045	0.522242	0.601958	0.68297	0.79807	0.950772	1.12106	1.33934	1.71173	2.35015	3.53511
0.0604735	0.117764	0.163541	0.207345	0.244276	0.292098	0.330227	0.390194	0.450699	0.522389	0.602531	0.683815	0.799433	0.951796	1.1217	1.34148	1.71491	2.35266	3.54072
0.0605164	0.117838	0.163637	0.207422	0.244277	0.292173	0.330372	0.390278	0.450882	0.522869	0.602714	0.684039	0.799543	0.952229	1.12285	1.34159	1.71696	2.35423	3.54314
0.0605373	0.117839	0.163663	0.207551	0.244291	0.292282	0.330426	0.390299	0.451008	0.52289	0.602814	0.68419	0.80008	0.952393	1.12423	1.34319	1.71822	2.35519	3.54383
0.0605418	0.117899	0.163703	0.207716	0.244343	0.292291	0.330595	0.390588	0.451649	0.52354	0.602876	0.684209	0.80091	0.952776	1.1246	1.3435	1.72085	2.35881	3.54917
0.0605593	0.117939	0.163772	0.207806	0.244605	0.29249	0.33064	0.390633	0.4517	0.523696	0.603272	0.684406	0.801608	0.953345	1.12701	1.34357	1.72153	2.35923	3.54991
0.0605879	0.117963	0.163773	0.207812	0.24483	0.292555	0.330875	0.390728	0.451705	0.523951	0.60335	0.684625	0.803211	0.953867	1.12772	1.34413	1.72598	2.36023	3.55287
0.0605998	0.118022	0.163773	0.207812	0.245002	0.292597	0.330951	0.390931	0.451737	0.524517	0.603655	0.684969	0.804224	0.954502	1.12776	1.34443	1.72862	2.36111	3.56293
0.0606656	0.118025	0.163786	0.207812	0.245054	0.292746	0.330953	0.390949	0.45185	0.5247	0.603683	0.685558	0.804331	0.954999	1.12853	1.34446	1.7344	2.36262	3.5652
0.0606659	0.11805	0.163877	0.207812	0.245168	0.292895	0.330985	0.391015	0.452157	0.524941	0.603924	0.685662	0.804692	0.955174	1.12921	1.34458	1.73476	2.36828	3.57935
0.0606831	0.118057	0.164156	0.207812	0.245181	0.293127	0.331167	0.391441	0.452293	0.524958	0.604162	0.685871	0.805047	0.956238	1.1296	1.34504	1.73511	2.37098	3.588
0.0607087	0.118091	0.164172	0.207812	0.245231	0.29343	0.331295	0.39149	0.45236	0.524973	0.604396	0.686338	0.805222	0.957501	1.12972	1.34528	1.73643	2.37227	3.59084
0.0607974	0.118246	0.164291	0.207812	0.245274	0.293461	0.3313	0.391585	0.452473	0.525228	0.60452	0.686524	0.80552	0.961595	1.13089	1.34558	1.737	2.37713	3.59923
0.0608362	0.118254	0.16437	0.207812	0.245434	0.293487	0.331543	0.391599	0.452664	0.525491	0.604965	0.686997	0.806092	0.961802	1.13112	1.34881	1.74033	2.3782	3.62059
0.0608606	0.11843	0.164505	0.207812	0.245808	0.293513	0.332014	0.391722	0.45294	0.525971	0.605109	0.687396	0.806184	0.961809	1.13136	1.34957	1.74304	2.38102	3.62386
0.0609152	0.1185	0.164531	0.207812	0.245813	0.293521	0.332162	0.391873	0.452975	0.526013	0.605778	0.687595	0.806433	0.963447	1.13321	1.35024	1.74509	2.38161	3.62571
0.0609392	0.118553	0.164546	0.207812	0.245864	0.29355	0.33236	0.391983	0.453019	0.52622	0.605957	0.688084	0.80656	0.963686	1.13353	1.35063	1.74659	2.38368	3.62688
0.060968	0.118782	0.16466	0.207812	0.245889	0.293884	0.332418	0.392099	0.453036	0.526434	0.606774	0.688583	0.806748	0.963703	1.13487	1.35095	1.74888	2.38706	3.62712
0.0609846	0.11883	0.164757	0.207812	0.245957	0.293891	0.332532	0.392409	0.453122	0.526951	0.606775	0.689483	0.806903	0.964168	1.13749	1.35139	1.74914	2.39743	3.63204
0.0610358	0.118859	0.164772	0.207812	0.245988	0.293891	0.332568	0.392683	0.453664	0.52697	0.606901	0.689752	0.806984	0.965659	1.13806	1.35166	1.75053	2.3991	3.64511
0.061223	0.118862	0.164781	0.207812	0.246103	0.293891	0.332747	0.392737	0.45369	0.527221	0.606943	0.689926	0.807302	0.966249	1.13857	1.35288	1.75123	2.40691	3.65363
0.0612794	0.118975	0.164805	0.207812	0.246153	0.293891	0.332839	0.392861	0.454063	0.52743	0.606968	0.690141	0.807515	0.967063	1.13955	1.35347	1.75367	2.40691	3.65703
0.0612799	0.119008	0.164904	0.207812	0.246286	0.293891	0.332969	0.392898	0.454125	0.527761	0.607273	0.690404	0.807723	0.967687	1.14044	1.3557	1.75396	2.41964	3.66813
0.0613456	0.119046	0.164909	0.207812	0.246317	0.293891	0.332992	0.393125	0.45431	0.527818	0.607523	0.690544	0.807781	0.968361	1.14087	1.35796	1.75396	2.42163	3.67095
0.0613861	0.119241	0.165061	0.207812	0.246333	0.293891	0.332993	0.393413	0.454506	0.528239	0.607791	0.690548	0.808355	0.969218	1.14112	1.35827	1.75396	2.42328	3.68093
0.0614243	0.119258	0.165118	0.207812	0.24643	0.293891	0.333076	0.393549	0.45461	0.528243	0.60802	0.690614	0.808456	0.969248	1.14248	1.36016	1.75475	2.42799	3.68097
0.0614782	0.119373	0.16513	0.207812	0.246461	0.293891	0.333104	0.393686	0.454852	0.528328	0.608303	0.690964	0.808928	0.969384	1.14412	1.36299	1.75505	2.43834	3.68186
0.0615762	0.11938	0.165147	0.207812	0.246488	0.293891	0.333253	0.39392	0.455014	0.528397	0.608521	0.691061	0.809864	0.969551	1.14496	1.36413	1.75633	2.443	3.68343
0.0616177	0.119418	0.165172	0.207812	0.246533	0.293891	0.333454	0.393969	0.455024	0.528618	0.608581	0.691251	0.810212	0.969904	1.14558	1.36463	1.75899	2.44516	3.68748
0.0616368	0.119533	0.165198	0.207812	0.246733	0.293891	0.333661	0.394001	0.455568	0.529215	0.608718	0.691555	0.810664	0.970969	1.14617	1.36482	1.75995	2.44555	3.68748
0.061689	0.119548	0.165322	0.207812	0.246748	0.293891	0.333788	0.39401	0.455675	0.52941	0.608751	0.692307	0.811133	0.971087	1.14643	1.3667	1.76033	2.44722	3.68748
0.06169	0.119578	0.165433	0.207812	0.246915	0.293891	0.333795	0.394156	0.455862	0.529673	0.608833	0.692373	0.81124	0.971396	1.14726	1.36814	1.76098	2.44837	3.69344
0.0617075	0.119638	0.165442	0.207812	0.246983	0.293891	0.333815	0.39418	0.455897	0.530037	0.608889	0.692982	0.81145	0.973568	1.14743	1.36959	1.76161	2.45001	3.70028
0.0618513	0.119679	0.165513	0.207812	0.246996	0.293891	0.333923	0.394339	0.456145	0.530099	0.608919	0.693023	0.812271	0.974956	1.14811	1.37293	1.76818	2.45273	3.70307
0.061852	0.119695	0.16567	0.207812	0.2472	0.293891	0.334078	0.394684	0.456566	0.530261	0.608955	0.693449	0.81243	0.975019	1.14876	1.37567	1.76824	2.45625	3.71256
0.061862	0.119784	0.165691	0.207812	0.247245	0.293891	0.334084	0.394873	0.456853	0.530321	0.608957	0.69353	0.812542	0.975338	1.14912	1.37575	1.76921	2.46389	3.71837
0.0618867	0.119788	0.165693	0.207812	0.247276	0.293891	0.334179	0.394963	0.456921	0.530567	0.60903	0.69353	0.812739	0.975365	1.15127	1.37673	1.76994	2.47044	3.71992
0.0618938	0.119806	0.165769	0.207812	0.247504	0.293891	0.334486	0.39511	0.457196	0.530967	0.609045	0.69353	0.813796	0.97537	1.15182	1.37997	1.77137	2.47276	3.72
0.0619026	0.11982	0.165886	0.207812	0.247516	0.293891	0.334555	0.395163	0.457497	0.531394	0.609205	0.69353	0.814144	0.975796	1.15251	1.38014	1.77144	2.47298	3.7207
0.0619329	0.119838	0.166062	0.207812	0.247685	0.293891	0.334805	0.395218	0.457942	0.531494	0.609339	0.69353	0.81435	0.976021	1.15269	1.38198	1.77181	2.47581	3.7207
0.0619385	0.119904	0.166383	0.207812	0.247687	0.293891	0.335185	0.395543	0.458214	0.531787	0.609359	0.69353	0.814599	0.976612	1.15427	1.38226	1.77204	2.47818	3.7207
0.0619697	0.119987	0.166392	0.207812	0.247708	0.293902	0.335219	0.396045	0.45849	0.531928	0.609371	0.69353	0.814925	0.977125	1.15445	1.38438	1.77279	2.48047	3.7207
0.0619782	0.120005	0.166495	0.207812	0.247715	0.294069	0.335223	0.39607	0.458573	0.53195	0.609634	0.69353	0.81516	0.978448	1.15471	1.38452	1.77307	2.48047	3.7207
0.0619888	0.120065	0.166508	0.207812	0.247938	0.294299	0.33532	0.39621	0.459133	0.532461	0.610154	0.693893	0.815337	0.979199	1.15483	1.38563	1.77329	2.48047	3.7207
0.0619894	0.120129	0.166523	0.207812	0.248011	0.294336	0.335361	0.396234	0.460011	0.532537	0.610373	0.694456	0.815383	0.979511	1.15566	1.38574	1.77988	2.48047	3.7207
0.0619948	0.120174	0.16654	0.207812	0.248047	0.294405	0.335439	0.396315	0.460074	0.533068	0.610815	0.694845	0.815585	0.979528	1.1559	1.3862	1.78194	2.48047	3.72187
0.062056	0.120199	0.166558	0.207812	0.248047	0.294479	0.335777	0.39661	0.460155	0.533071	0.610898	0.694895	0.815724	0.9808	1.15618	1.38636	1.78403	2.48047	3.72862
0.0621554	0.120201	0.166589	0.207812	0.248047	0.294502	0.335918	0.396721	0.460375	0.533152	0.611323	0.69591	0.816428	0.981086	1.15639	1.38673	1.78542	2.48047	3.73572
0.062192	0.120337	0.166783	0.207812	0.248047	0.294684	0.336023	0.396775	0.460427	0.533163	0.611936	0.696157	0.81683	0.981106	1.15659	1.38682	1.78653	2.48047	3.75293
0.0622406	0.120338	0.166796	0.207812	0.248047	0.294768	0.336067	0.396894	0.460435	0.53331	0.612054	0.696443	0.817143	0.981964	1.15685	1.38714	1.78675	2.48047	3.761
0.062242	0.120339	0.166819	0.207812	0.248047	0.29483	0.336074	0.397116	0.460685	0.533732	0.612087	0.697064	0.817165	0.982924	1.15694	1.38718	1.7875	2.48047	3.76265
0.0622423	0.120382	0.166878	0.207812	0.248047	0.294959	0.336196	0.397349	0.460689	0.534467	0.612143	0.697082	0.817193	0.983397	1.15755	1.38937	1.79764	2.48047	3.77173
0.0622484	0.120466	0.167002	0.207812	0.248047	0.295057	0.337173	0.397468	0.460702	0.534744	0.612202	0.69715	0.818489	0.984585	1.15913	1.39098	1.79889	2.48047	3.77725
0.062292	0.120529	0.167003	0.207812	0.248047	0.295129	0.337186	0.397523	0.460829	0.535003	0.612335	0.698048	0.819085	0.985459	1.15962	1.39251	1.79933	2.48047	3.78037
0.0622969	0.120706	0.167057	0.207812	0.248047	0.295351	0.337317	0.39753	0.460948	0.535262	0.612734	0.69815	0.819153	0.985537	1.15987	1.3946	1.80119	2.48047	3.78982
0.0623078	0.120823	0.167189	0.207812	0.248047	0.295384	0.337473	0.397739	0.461065	0.535758	0.613465	0.69856	0.819191	0.987742	1.16069	1.39641	1.80153	2.48047	3.79544
0.0623309	0.120905	0.167275	0.207812	0.248047	0.295474	0.337509	0.397869	0.461858	0.535845	0.613559	0.698593	0.819195	0.988575	1.16129	1.39736	1.80407	2.48047	3.79951
0.0623438	0.120935	0.167396	0.207812	0.248047	0.29549	0.337619	0.398109	0.46192	0.536029	0.613735	0.698667	0.819466	0.989041	1.16162	1.39907	1.805	2.48047	3.80108
0.0623889	0.120936	0.167408	0.207812	0.248047	0.295511	0.337669	0.398185	0.462127	0.536058	0.614081	0.69875	0.819467	0.989481	1.16423	1.39966	1.80581	2.48047	3.80563
0.0624262	0.120977	0.167412	0.207812	0.248047	0.295715	0.337696	0.398373	0.462697	0.53618	0.614393	0.699499	0.819955	0.989499	1.16426	1.40068	1.80583	2.48047	3.808
0.0624496	0.121022	0.167472	0.207812	0.248047	0.29592	0.337735	0.398402	0.463111	0.536521	0.614532	0.699671	0.81998	0.989915	1.16704	1.40317	1.80601	2.48047	3.80915
0.0624821	0.121067	0.167503	0.207812	0.248047	0.295965	0.337968	0.398615	0.463184	0.536675	0.614561	0.700415	0.820482	0.990094	1.16879	1.4037	1.8081	2.48047	3.81636
0.0626162	0.121136	0.167509	0.207812	0.248047	0.296095	0.338043	0.398656	0.463249	0.537718	0.614604	0.700453	0.821577	0.990355	1.1691	1.40459	1.80851	2.48047	3.8173
0.0626796	0.121323	0.167953	0.207812	0.248047	0.296239	0.338103	0.398763	0.463306	0.537827	0.61491	0.700743	0.821886	0.991075	1.1713	1.40488	1.80851	2.48125	3.82059
0.0626968	0.121348	0.168014	0.207812	0.248047	0.296343	0.338393	0.398772	0.463385	0.538294	0.614932	0.701458	0.821931	0.99129	1.17161	1.40498	1.80851	2.48125	3.8221
0.0627055	0.121427	0.168089	0.207812	0.248047	0.296403	0.338567	0.398898	0.463444	0.538313	0.615461	0.701829	0.822277	0.991933	1.17411	1.40905	1.80851	2.48858	3.82317
0.0627201	0.121545	0.168127	0.207812	0.248047	0.296407	0.338606	0.399208	0.463727	0.538474	0.61689	0.701979	0.822523	0.992072	1.17489	1.41042	1.80851	2.48943	3.8274
0.0627206	0.12156	0.168156	0.207812	0.248047	0.29642	0.338634	0.399292	0.463989	0.538491	0.617093	0.702367	0.822813	0.992188	1.17502	1.41139	1.80851	2.49052	3.82805
0.0627391	0.121595	0.168214	0.207812	0.248047	0.296515	0.338668	0.399667	0.464197	0.538733	0.617093	0.702374	0.822863	0.992188	1.17557	1.41217	1.80851	2.49056	3.83361
0.0627799	0.12169	0.168481	0.207812	0.248047	0.29681	0.338719	0.400165	0.464295	0.538781	0.617261	0.70263	0.823757	0.992188	1.17557	1.41287	1.80851	2.49081	3.83372
0.0627842	0.121824	0.168546	0.207812	0.248047	0.296976	0.338779	0.400199	0.464305	0.539024	0.617547	0.703013	0.824032	0.992188	1.17557	1.41352	1.80851	2.49284	3.835
0.0628556	0.121857	0.16862	0.207812	0.248047	0.297232	0.338839	0.400304	0.464418	0.539031	0.617724	0.703087	0.824131	0.992188	1.17717	1.41373	1.80851	2.49711	3.8361
0.0629493	0.121885	0.168661	0.207812	0.248047	0.297516	0.339298	0.400324	0.464595	0.53922	0.6179	0.703381	0.824573	0.992188	1.17826	1.41881	1.80855	2.49817	3.84068
0.0630115	0.121914	0.168717	0.207812	0.248047	0.297576	0.339499	0.400378	0.464683	0.539615	0.617953	0.703585	0.824819	0.992188	1.1786	1.41924	1.80942	2.49949	3.84267
0.0631135	0.121919	0.168735	0.207812	0.248047	0.297578	0.339598	0.400667	0.464683	0.539622	0.61844	0.704094	0.825282	0.992188	1.17897	1.42002	1.81184	2.50056	3.84324
0.063131	0.12193	0.168785	0.207812	0.248047	0.298215	0.33981	0.400672	0.464683	0.539633	0.618466	0.704701	0.825594	0.992188	1.17924	1.421	1.82042	2.50372	3.85196
0.0631317	0.122156	0.168796	0.207812	0.248047	0.298353	0.339979	0.400673	0.464683	0.539755	0.618587	0.705692	0.825805	0.992188	1.17932	1.4226	1.82204	2.50415	3.85275
0.0631449	0.122266	0.16882	0.207812	0.248047	0.298563	0.340042	0.400987	0.464683	0.540323	0.619203	0.706038	0.826702	0.992188	1.17941	1.42404	1.82204	2.50842	3.85307
0.0631663	0.122266	0.16902	0.207812	0.248047	0.298604	0.340075	0.400988	0.464683	0.540795	0.619429	0.706619	0.826728	0.992188	1.17979	1.42575	1.82445	2.50905	3.86232
0.0631762	0.122268	0.169053	0.207812	0.248047	0.298726	0.340346	0.401191	0.464683	0.540853	0.619758	0.706843	0.826972	0.99326	1.18098	1.43031	1.82614	2.51212	3.86315
0.063235	0.122478	0.169094	0.207812	0.248047	0.29874	0.340358	0.40133	0.464683	0.540919	0.619769	0.707676	0.82709	0.995359	1.18141	1.43107	1.82623	2.51409	3.86496
0.0632856	0.122659	0.169169	0.207812	0.248047	0.299082	0.340478	0.40138	0.464683	0.54101	0.619972	0.707683	0.827252	0.995414	1.18172	1.43137	1.82708	2.51841	3.87065
0.063475	0.122842	0.169264	0.207812	0.248113	0.299168	0.340622	0.401452	0.464683	0.54173	0.620118	0.708089	0.827603	0.995654	1.18284	1.43204	1.8305	2.52169	3.87338
0.0635897	0.122884	0.169268	0.207812	0.248212	0.299222	0.340724	0.40146	0.464683	0.54174	0.620255	0.708169	0.827611	0.997012	1.18376	1.43369	1.83287	2.52231	3.87378
0.0635945	0.122926	0.169352	0.207812	0.2483	0.299251	0.340833	0.40159	0.464683	0.541814	0.620312	0.70818	0.828016	0.997283	1.18659	1.43396	1.8352	2.52538	3.87877
0.0636239	0.12294	0.169434	0.207812	0.248312	0.299254	0.340834	0.401926	0.464683	0.541938	0.620312	0.708299	0.828271	0.997655	1.18845	1.43802	1.83661	2.52892	3.88625
0.0636241	0.122983	0.169575	0.207812	0.248426	0.299309	0.341079	0.401974	0.464683	0.542381	0.620312	0.708382	0.828448	0.997906	1.18874	1.44001	1.83961	2.52959	3.88635
0.0636603	0.122993	0.169714	0.207812	0.248681	0.299353	0.341222	0.402344	0.464683	0.542586	0.620312	0.709432	0.828693	0.998679	1.18894	1.44244	1.8438	2.52959	3.88898
0.0637001	0.12325	0.169862	0.207812	0.24886	0.299427	0.341298	0.402441	0.464683	0.542864	0.620312	0.709551	0.829395	1.00047	1.18916	1.44262	1.84486	2.52959	3.88938
0.0637265	0.123321	0.16989	0.207812	0.248876	0.29947	0.341316	0.402655	0.464683	0.542891	0.620312	0.709591	0.830145	1.00063	1.19095	1.44446	1.84498	2.52959	3.88938
0.0638377	0.123359	0.169936	0.207812	0.248894	0.299834	0.34138	0.402663	0.464683	0.542959	0.620312	0.710349	0.83017	1.00118	1.19192	1.44602	1.84522	2.52959	3.89199
0.0638793	0.123456	0.170049	0.207812	0.249031	0.300039	0.341613	0.402943	0.464683	0.543273	0.620312	0.710591	0.830503	1.00119	1.19205	1.44635	1.84625	2.53125	3.90047
0.0639136	0.123569	0.170201	0.207812	0.249098	0.30018	0.341674	0.403073	0.464683	0.543301	0.620312	0.710641	0.830983	1.00142	1.19248	1.44635	1.84811	2.53576	3.921
0.0639505	0.123794	0.170225	0.207812	0.249185	0.300196	0.341803	0.403187	0.464683	0.543325	0.620312	0.711798	0.83125	1.00145	1.1925	1.44635	1.84854	2.54047	3.92197
0.0639605	0.12381	0.170338	0.207812	0.249285	0.300202	0.34213	0.403302	0.464683	0.54419	0.620312	0.712264	0.83125	1.0021	1.19331	1.44635	1.84875	2.54462	3.92197
0.0639813	0.123837	0.170426	0.207812	0.249486	0.300221	0.342636	0.403478	0.464683	0.544765	0.620313	0.712342	0.83125	1.00274	1.1941	1.44635	1.84996	2.54681	3.92197
0.0640345	0.12385	0.170555	0.207812	0.249551	0.300322	0.342661	0.403639	0.464722	0.544933	0.620313	0.712432	0.83125	1.00296	1.19424	1.44635	1.8513	2.54961	3.92647
0.064035	0.123897	0.170612	0.207812	0.249573	0.30037	0.342763	0.404059	0.464888	0.545296	0.620313	0.712626	0.83125	1.00351	1.19497	1.44635	1.85454	2.55184	3.92892
0.0640626	0.123988	0.170642	0.207812	0.249669	0.30052	0.34279	0.404074	0.465003	0.545318	0.620313	0.712959	0.83125	1.00361	1.19524	1.44635	1.86022	2.5538	3.93091
0.064071	0.124001	0.170837	0.207812	0.249679	0.30063	0.342802	0.404164	0.465104	0.545573	0.620313	0.713581	0.83125	1.0041	1.19559	1.44689	1.86041	2.55404	3.9324
0.0640758	0.124023	0.170971	0.207812	0.249814	0.300741	0.343071	0.404273	0.465312	0.54575	0.620313	0.714032	0.83125	1.00448	1.19575	1.44814	1.86376	2.55761	3.93905
0.0641288	0.124029	0.171011	0.207812	0.249831	0.300791	0.343173	0.404415	0.466835	0.54577	0.620313	0.715037	0.83125	1.00471	1.19653	1.45099	1.86704	2.561	3.94668
0.0641327	0.124059	0.171079	0.207812	0.250213	0.30089	0.343269	0.404448	0.466978	0.54583	0.620313	0.715165	0.83125	1.00527	1.19702	1.45106	1.86745	2.56201	3.9636
0.0641384	0.124082	0.171466	0.207812	0.25025	0.300904	0.343465	0.40456	0.46778	0.54616	0.620932	0.715827	0.831359	1.00556	1.19747	1.45469	1.87031	2.56918	3.96375
0.0642208	0.124159	0.17161	0.207812	0.2503	0.300905	0.34367	0.405005	0.467803	0.546351	0.621516	0.716165	0.831481	1.00624	1.19938	1.45469	1.87505	2.57244	3.96468
0.0642427	0.124163	0.171682	0.207812	0.250329	0.300964	0.343804	0.405172	0.467868	0.546697	0.622301	0.716166	0.832588	1.00647	1.19949	1.45512	1.87634	2.58044	3.96875
0.0642427	0.124308	0.171803	0.207812	0.250346	0.300969	0.343902	0.405328	0.467989	0.546807	0.622304	0.717297	0.832839	1.00685	1.19959	1.45539	1.87654	2.58947	3.97649
0.0642558	0.12457	0.171866	0.207812	0.250365	0.301059	0.343928	0.405666	0.468102	0.546957	0.622392	0.717623	0.83353	1.00691	1.19968	1.4559	1.87662	2.59255	3.98516
0.0643101	0.124583	0.17192	0.207812	0.250372	0.301229	0.343945	0.405882	0.468165	0.547362	0.622656	0.717979	0.834146	1.00728	1.20048	1.45712	1.877	2.59298	3.99842
0.0643165	0.124718	0.171923	0.207812	0.250418	0.301303	0.343962	0.405932	0.468233	0.547727	0.623105	0.718275	0.834206	1.00788	1.20081	1.45982	1.8775	2.59314	4.0017
0.0643268	0.124723	0.171998	0.207812	0.2507	0.301624	0.343964	0.406842	0.46842	0.548048	0.623126	0.718374	0.834379	1.00815	1.20137	1.46012	1.87874	2.59357	4.01394
0.0643353	0.124769	0.172003	0.207812	0.250916	0.301629	0.344916	0.406859	0.46901	0.548096	0.623134	0.71926	0.834651	1.00915	1.20161	1.46171	1.88049	2.59551	4.01704
0.0643854	0.124892	0.172083	0.207812	0.25101	0.301716	0.34501	0.406893	0.469082	0.548725	0.623222	0.720001	0.834841	1.00929	1.20251	1.46427	1.8829	2.59624	4.03336
0.0644476	0.124951	0.172125	0.207812	0.251241	0.301742	0.345158	0.406894	0.469281	0.548873	0.623383	0.720061	0.836849	1.00931	1.20305	1.46454	1.88413	2.61306	4.03774
0.0645066	0.124991	0.172125	0.207812	0.251334	0.301962	0.345283	0.406957	0.469387	0.549279	0.623437	0.720106	0.837667	1.00945	1.20335	1.46545	1.88661	2.61352	4.0477
0.0646415	0.125048	0.172176	0.207812	0.251349	0.301965	0.345342	0.406983	0.469665	0.549544	0.623437	0.720404	0.838717	1.01017	1.2036	1.46607	1.88751	2.61427	4.04814
0.0646713	0.125088	0.172181	0.207812	0.251428	0.302109	0.345355	0.407073	0.469814	0.549558	0.623437	0.720669	0.839032	1.01021	1.20411	1.46835	1.88903	2.61507	4.05564
0.0647278	0.125151	0.172224	0.207812	0.251446	0.302132	0.345384	0.407238	0.470138	0.549623	0.623437	0.720722	0.839287	1.01136	1.20436	1.46946	1.89339	2.61547	4.05827
0.0647637	0.125169	0.172286	0.207812	0.251493	0.302525	0.345443	0.407509	0.47038	0.549697	0.623437	0.720888	0.839774	1.01189	1.20452	1.46953	1.89415	2.61569	4.05837
0.0647649	0.12521	0.172349	0.207812	0.251613	0.302562	0.345443	0.407618	0.470798	0.550428	0.623437	0.721595	0.840195	1.01241	1.20528	1.47043	1.89592	2.61942	4.06038
0.0649609	0.125277	0.172359	0.207812	0.251709	0.302697	0.345498	0.407856	0.470808	0.55073	0.623437	0.72175	0.840399	1.01322	1.20658	1.4724	1.89668	2.62288	4.06234
0.0650367	0.125325	0.172455	0.207812	0.251897	0.302718	0.345703	0.408086	0.470957	0.550733	0.623438	0.722045	0.840644	1.01352	1.20675	1.47419	1.9017	2.63308	4.06415
0.0651103	0.125375	0.172498	0.207812	0.251991	0.302876	0.345745	0.408151	0.471036	0.550805	0.623438	0.722732	0.840888	1.01355	1.20801	1.47428	1.90274	2.63565	4.07467
0.0651251	0.125491	0.17263	0.207812	0.252126	0.302927	0.345788	0.408454	0.471053	0.550846	0.623438	0.723324	0.84105	1.01402	1.20897	1.47503	1.90277	2.63591	4.08469
0.0651464	0.125588	0.172643	0.207812	0.252136	0.302968	0.345916	0.408971	0.471055	0.551069	0.623438	0.723649	0.841124	1.01417	1.21101	1.47524	1.90447	2.64143	4.08562
0.06516	0.125632	0.172759	0.207812	0.252171	0.303095	0.345989	0.409025	0.471283	0.551392	0.623438	0.724071	0.84121	1.01418	1.21137	1.47548	1.90512	2.64368	4.09737
0.0652208	0.125645	0.172826	0.207812	0.252316	0.303121	0.346029	0.409098	0.471474	0.55159	0.623438	0.724135	0.842798	1.01453	1.21148	1.47806	1.90845	2.64402	4.0987
0.0652324	0.125695	0.172883	0.207812	0.252331	0.303406	0.346261	0.409113	0.471607	0.552053	0.623438	0.724222	0.843265	1.01526	1.21174	1.48179	1.90932	2.64699	4.0987
0.0652614	0.125739	0.172905	0.207812	0.252347	0.30356	0.346389	0.409151	0.471805	0.552542	0.623438	0.724436	0.844323	1.01557	1.21174	1.48344	1.91287	2.64802	4.09888
0.0653077	0.125739	0.172919	0.207812	0.252391	0.303869	0.346405	0.409274	0.472206	0.552851	0.623438	0.725051	0.844402	1.01598	1.21174	1.48415	1.91437	2.64861	4.10999
0.0653828	0.125769	0.172932	0.207812	0.252472	0.303988	0.346456	0.409289	0.4723	0.552878	0.623438	0.725112	0.844509	1.01622	1.21174	1.48828	1.91498	2.65643	4.11655
0.0654027	0.12606	0.172943	0.207812	0.252492	0.304545	0.346543	0.409364	0.472441	0.552914	0.623438	0.725433	0.845149	1.01633	1.21174	1.48939	1.9158	2.66178	4.11932
0.0654168	0.126217	0.172986	0.207812	0.25256	0.3047	0.346668	0.409459	0.472766	0.553225	0.623438	0.725852	0.845241	1.01717	1.21174	1.49154	1.92054	2.66594	4.12257
0.0654492	0.126377	0.173047	0.207812	0.252609	0.3049	0.346708	0.40958	0.472902	0.553623	0.623438	0.725972	0.845359	1.01792	1.2123	1.49359	1.92074	2.67135	4.12759
0.0655372	0.126613	0.173096	0.207812	0.252615	0.304988	0.346801	0.409704	0.473009	0.554101	0.623438	0.726275	0.84547	1.01885	1.21471	1.49604	1.92257	2.67155	4.13127
0.0655543	0.126621	0.173104	0.207812	0.252655	0.305134	0.347162	0.409866	0.473365	0.554147	0.623438	0.727319	0.845486	1.01897	1.21505	1.49774	1.92381	2.67155	4.14049
0.0656303	0.126682	0.173158	0.207812	0.252824	0.305217	0.347181	0.410205	0.474064	0.554481	0.623438	0.727513	0.846832	1.02011	1.21764	1.49923	1.92555	2.67449	4.14239
0.0657043	0.126682	0.173663	0.207812	0.252919	0.305251	0.347279	0.410219	0.474065	0.554526	0.623438	0.728068	0.847191	1.02055	1.2183	1.50018	1.92628	2.67496	4.14292
0.0657554	0.126734	0.173918	0.207812	0.253003	0.30535	0.347452	0.410269	0.474425	0.55465	0.623438	0.728694	0.847321	1.02059	1.21873	1.502	1.92699	2.67973	4.14677
0.0658089	0.126763	0.173922	0.207812	0.253039	0.305738	0.347527	0.410437	0.474465	0.55465	0.623438	0.728695	0.848091	1.02099	1.22036	1.50294	1.92743	2.68034	4.15423
0.0658153	0.126831	0.173961	0.207812	0.2531	0.305847	0.347594	0.41055	0.474502	0.55465	0.623616	0.72874	0.848829	1.02299	1.22062	1.50718	1.92803	2.68549	4.15802
0.0658465	0.126919	0.174046	0.207812	0.253114	0.306147	0.34772	0.410591	0.474515	0.55465	0.623713	0.729052	0.848877	1.02306	1.22285	1.50722	1.92917	2.68792	4.15802
0.0658895	0.126945	0.174074	0.207812	0.253227	0.306235	0.347882	0.410719	0.474604	0.55465	0.624053	0.72909	0.84973	1.02326	1.22362	1.50856	1.92925	2.69248	4.15802
0.0659077	0.12698	0.174137	0.207812	0.253275	0.306393	0.347896	0.410843	0.474924	0.55465	0.62467	0.729872	0.849731	1.02339	1.22584	1.51154	1.93239	2.69303	4.15802
0.0659216	0.127016	0.174154	0.207812	0.253531	0.306525	0.347917	0.410977	0.475055	0.554791	0.625213	0.730156	0.84977	1.02341	1.22739	1.51246	1.93351	2.69555	4.15802
0.0659416	0.12702	0.17416	0.207812	0.253578	0.306526	0.347955	0.411195	0.47536	0.555257	0.626154	0.7304	0.850098	1.02387	1.22776	1.51492	1.9348	2.69586	4.16842
0.0659766	0.127033	0.174181	0.207813	0.253669	0.306576	0.348064	0.411769	0.475873	0.555286	0.62621	0.730627	0.850361	1.02414	1.22778	1.51566	1.9354	2.69634	4.17986
0.0659835	0.127036	0.174232	0.207813	0.25384	0.306829	0.348106	0.411848	0.476335	0.555302	0.626414	0.731647	0.850435	1.02417	1.22779	1.52055	1.93549	2.69773	4.18215
0.0660014	0.127143	0.174289	0.207813	0.253883	0.307	0.348119	0.411899	0.476552	0.555314	0.626601	0.731787	0.851177	1.02458	1.23022	1.52144	1.93554	2.70156	4.1902
0.0660019	0.127193	0.174292	0.207813	0.254051	0.307029	0.348375	0.412007	0.476714	0.556523	0.626883	0.732583	0.852156	1.02497	1.23164	1.52168	1.94239	2.70156	4.19122
0.0660446	0.127347	0.174367	0.207813	0.254291	0.307067	0.348424	0.412157	0.476831	0.556702	0.626964	0.732979	0.852809	1.02559	1.23217	1.52191	1.94445	2.70156	4.20879
0.0661008	0.12739	0.174384	0.207813	0.254369	0.307097	0.348433	0.412183	0.47701	0.557454	0.627387	0.733065	0.853358	1.02563	1.23297	1.52247	1.9457	2.70156	4.20924
0.0661343	0.127489	0.174484	0.207813	0.254678	0.307158	0.348503	0.412226	0.477188	0.557903	0.628084	0.733102	0.853681	1.02569	1.23412	1.52262	1.94676	2.70156	4.21035
0.066172	0.12751	0.174525	0.207813	0.255006	0.307224	0.348706	0.412235	0.47749	0.557994	0.628272	0.733458	0.854187	1.02594	1.23491	1.52289	1.94945	2.70156	4.21432
0.0661971	0.12758	0.174539	0.207813	0.255091	0.307319	0.348818	0.412445	0.477989	0.558069	0.628299	0.733628	0.854244	1.02616	1.23612	1.52881	1.95011	2.70419	4.2168
0.0662088	0.127649	0.174622	0.207813	0.255274	0.307371	0.34894	0.412466	0.478327	0.558301	0.629089	0.733866	0.854969	1.0263	1.23615	1.52902	1.95312	2.70421	4.22525
0.0662095	0.127662	0.174811	0.207813	0.255319	0.307385	0.348973	0.412722	0.478474	0.558533	0.629253	0.734073	0.855402	1.02847	1.2363	1.52952	1.95345	2.70526	4.23753
0.0662401	0.127737	0.174863	0.207813	0.255414	0.307733	0.349539	0.413067	0.478523	0.558594	0.629295	0.73443	0.856002	1.02949	1.23738	1.52958	1.95851	2.70557	4.2431
0.0662506	0.127821	0.174975	0.207813	0.255424	0.307795	0.349772	0.413324	0.478571	0.559147	0.62951	0.735148	0.856833	1.02985	1.23816	1.53084	1.95893	2.72197	4.25311
0.0662666	0.127839	0.175109	0.207813	0.255574	0.307851	0.349798	0.413522	0.479394	0.559262	0.629524	0.735405	0.856833	1.03028	1.23878	1.53088	1.95983	2.72232	4.26494
0.0663053	0.127845	0.175109	0.207813	0.25564	0.307893	0.349986	0.414018	0.479422	0.559321	0.629569	0.735553	0.856833	1.03148	1.23892	1.53573	1.96014	2.72266	4.27203
0.0663815	0.127858	0.175206	0.207813	0.255833	0.308225	0.350018	0.414207	0.479427	0.559334	0.629598	0.736122	0.856833	1.03151	1.24023	1.53681	1.96022	2.72434	4.27539
0.0664196	0.128074	0.175208	0.207813	0.256133	0.308327	0.350028	0.414428	0.479608	0.559651	0.629859	0.736137	0.856833	1.03157	1.24023	1.53769	1.96118	2.72614	4.27912
0.0664923	0.128105	0.175288	0.207914	0.256245	0.308374	0.350224	0.414491	0.480168	0.559808	0.630297	0.736543	0.856833	1.03215	1.24023	1.5381	1.9616	2.7268	4.27912
0.0665099	0.128142	0.175319	0.207992	0.256443	0.308444	0.350237	0.41463	0.480499	0.559854	0.630459	0.736701	0.856833	1.03243	1.24023	1.53961	1.96196	2.72852	4.27912
0.0665377	0.128377	0.175455	0.208122	0.256493	0.308622	0.350401	0.414936	0.480651	0.560089	0.630761	0.737008	0.856833	1.03248	1.24023	1.54084	1.96313	2.74018	4.28027
0.0665733	0.128382	0.175663	0.208149	0.256594	0.308656	0.350472	0.415398	0.480717	0.560685	0.630919	0.737093	0.856833	1.0325	1.24023	1.54101	1.96421	2.74026	4.2809
0.0665816	0.128393	0.17567	0.208459	0.256597	0.308723	0.350477	0.415419	0.480879	0.56147	0.630972	0.737546	0.856833	1.03255	1.24023	1.54232	1.96481	2.74215	4.28416
0.0666838	0.128454	0.175705	0.208518	0.256728	0.30874	0.350555	0.415625	0.48111	0.561511	0.631192	0.737593	0.856833	1.03279	1.24023	1.54265	1.96801	2.74444	4.28416
0.0667742	0.128479	0.175794	0.208653	0.256869	0.308788	0.350654	0.415625	0.481138	0.561735	0.631394	0.738973	0.856833	1.03418	1.24023	1.54314	1.97081	2.75123	4.29919
0.0668238	0.128715	0.1758	0.208754	0.257023	0.30896	0.350791	0.415625	0.481327	0.562312	0.631969	0.739158	0.857099	1.03538	1.24023	1.54338	1.9715	2.7583	4.31119
0.066843	0.128804	0.175828	0.208764	0.257245	0.308967	0.350791	0.415625	0.481443	0.562666	0.632077	0.740277	0.858355	1.03611	1.24023	1.54349	1.97151	2.76008	4.31127
0.066856	0.128923	0.175834	0.208932	0.257313	0.3091	0.350791	0.415625	0.481528	0.562969	0.632199	0.74028	0.858769	1.03639	1.24023	1.54544	1.97214	2.76154	4.31735
0.0668964	0.128965	0.175851	0.208965	0.257414	0.309244	0.350843	0.415625	0.481623	0.563112	0.632306	0.740321	0.85879	1.0371	1.24023	1.54657	1.97377	2.76896	4.32019
0.0669594	0.129092	0.175879	0.209126	0.257835	0.30925	0.350985	0.415625	0.482053	0.563558	0.632377	0.740381	0.860574	1.03891	1.24023	1.54885	1.97502	2.77195	4.32788
0.067002	0.129099	0.175886	0.209227	0.25787	0.309387	0.351065	0.415625	0.482535	0.564013	0.632388	0.740939	0.861013	1.03906	1.24023	1.54899	1.97531	2.77325	4.33925
0.0670182	0.129133	0.175996	0.209389	0.257899	0.309388	0.351179	0.415625	0.482685	0.564319	0.632432	0.741471	0.861353	1.03906	1.24023	1.55039	1.97738	2.77325	4.33925
0.0670514	0.129164	0.176276	0.209403	0.257914	0.309423	0.351602	0.415625	0.483543	0.564425	0.63276	0.741871	0.861417	1.03906	1.24023	1.5507	1.97763	2.77325	4.34219
[truncated: 9,142 more rows]
