# Supplementary material for: Long-term intravital imaging of the multicolor-coded tumor microenvironment during combination immunotherapy
Source: eLife. 2016 Nov 18;5:e14756. doi: 10.7554/eLife.14756 (PMC5173323; doi:10.7554/eLife.14756)
Supplement: Figure 6—source data 2. — Data listed in the excel files are displacements. Displacement is a function of time. Each column in the excel files lists displacements corresponding to one time. The time values are 0.5 min, 1 min, 1.5 min, and so on, in turn. DOI: http://dx.doi.org/10.7554/eLife.14756.046 [file elife-14756-fig6-data2.xls]

## Sheet: displacement(um）
0	0	0	0	0	0	0	0	0	0	0	0	0	0	0	0	0	0	0	0	0	0	0	0.248047	0.55465	0.496094	0.496094	0.496094	0.744141	1.24023
0	0	0	0	0	0	0	0	0	0	0	0	0	0	0	0	0	0	0	0	0	0	0.248047	0.350791	0.55465	0.55465	0.55465	0.784393	1.24023	1.24023
0	0	0	0	0	0	0	0	0	0	0	0	0	0	0	0	0	0	0	0	0.248047	0.350791	0.350791	0.55465	0.55465	0.55465	0.784393	1.24023	1.24023	1.24023
0	0	0	0	0	0	0	0	0	0	0	0	0	0	0	0	0	0	0	0	0.350791	0.496094	0.496094	0.55465	0.55465	0.784393	1.24023	1.24023	1.2648	1.24023
0	0	0	0	0	0	0	0	0	0	0	0	0	0	0	0	0	0	0	0	0.496094	0.496094	0.55465	0.55465	0.701583	0.894346	1.24023	1.24023	1.2648	1.75396
0	0	0	0	0	0	0	0	0	0	0	0	0	0	0	0	0	0	0	0	0.496094	0.496094	0.55465	0.701583	0.744141	1.05237	1.24023	1.2648	1.2648	1.75396
0	0	0	0	0	0	0	0	0	0	0	0	0	0	0	0	0	0	0	0.248047	0.496094	0.55465	0.701583	0.744141	0.784393	1.24023	1.24023	1.2648	1.33577	1.75396
0	0	0	0	0	0	0	0	0	0	0	0	0	0	0	0	0	0	0	0.248047	0.496094	0.701583	0.744141	0.784393	1.05237	1.24023	1.24023	1.2648	1.58827	1.94849
0	0	0	0	0	0	0	0	0	0	0	0	0	0	0	0	0	0	0	0.248047	0.55465	0.744141	0.784393	0.992188	1.24023	1.2648	1.2648	1.2648	1.73633	2.77325
0	0	0	0	0	0	0	0	0	0	0	0	0	0	0	0	0	0	0	0.350791	0.701583	0.744141	0.992188	1.05237	1.24023	1.2648	1.2648	1.2648	1.75396	2.77325
0	0	0	0	0	0	0	0	0	0	0	0	0	0	0	0	0	0	0.248047	0.496094	0.744141	0.784393	1.02272	1.10802	1.24023	1.2648	1.2648	1.40317	1.75396	2.77325
0	0	0	0	0	0	0	0	0	0	0	0	0	0	0	0	0	0	0.248047	0.496094	0.744141	0.894346	1.03315	1.24023	1.24023	1.2648	1.2648	1.58827	1.93274	2.77325
0	0	0	0	0	0	0	0	0	0	0	0	0	0	0	0	0	0	0.248047	0.496094	0.744141	0.894346	1.05237	1.24023	1.2648	1.2648	1.2648	1.73633	1.93731	2.77325
0	0	0	0	0	0	0	0	0	0	0	0	0	0	0	0	0	0	0.248047	0.496094	0.784393	1.02272	1.1093	1.24023	1.2648	1.2648	1.2648	1.75396	1.99982	2.77325
0	0	0	0	0	0	0	0	0	0	0	0	0	0	0	0	0	0	0.248047	0.496094	0.784393	1.02272	1.1093	1.24023	1.2648	1.2648	1.33577	1.75396	2.10475	2.77325
0	0	0	0	0	0	0	0	0	0	0	0	0	0	0	0	0	0	0.248047	0.504739	0.894346	1.02272	1.24023	1.24023	1.2648	1.2648	1.58827	1.93731	2.21325	2.83567
0	0	0	0	0	0	0	0	0	0	0	0	0	0	0	0	0	0	0.248047	0.55465	0.992188	1.1093	1.24023	1.2648	1.2648	1.33577	1.73633	1.9682	2.5538	3.50791
0	0	0	0	0	0	0	0	0	0	0	0	0	0	0	0	0	0	0.248047	0.55465	0.992188	1.1093	1.24023	1.2648	1.31022	1.40317	1.75396	1.99982	2.5538	3.50791
0	0	0	0	0	0	0	0	0	0	0	0	0	0	0	0	0	0	0.248047	0.744141	1.02272	1.13861	1.24023	1.2648	1.33577	1.50881	1.75396	1.99982	2.5538	3.50791
0	0	0	0	0	0	0	0	0	0	0	0	0	0	0	0	0	0	0.248047	0.744141	1.02272	1.24023	1.2648	1.2648	1.33577	1.56988	1.82661	2.10475	2.5538	3.7207
0	0	0	0	0	0	0	0	0	0	0	0	0	0	0	0	0.248047	0.248047	0.350791	0.744141	1.02272	1.24023	1.2648	1.2648	1.44635	1.73633	1.93731	2.13378	2.67155	3.92197
0	0	0	0	0	0	0	0	0	0	0	0	0	0	0	0	0.248047	0.248047	0.350791	0.744141	1.02272	1.24023	1.2648	1.33577	1.48828	1.75396	1.93731	2.19699	2.73605	3.92197
0	0	0	0	0	0	0	0	0	0	0	0	0	0	0	0	0.248047	0.248047	0.350791	0.784393	1.05237	1.24023	1.2648	1.33577	1.50881	1.75396	1.99982	2.28688	2.7529	3.92197
0	0	0	0	0	0	0	0	0	0	0	0	0	0	0	0	0.248047	0.248047	0.496094	0.784393	1.1093	1.24023	1.33577	1.44635	1.50881	1.75396	1.99982	2.28688	2.77325	3.92197
0	0	0	0	0	0	0	0	0	0	0	0	0	0	0	0	0.248047	0.248047	0.496094	0.784393	1.1093	1.2648	1.33577	1.44635	1.58827	1.75396	1.99982	2.34007	2.77325	3.92197
0	0	0	0	0	0	0	0	0	0	0	0	0	0	0	0	0.248047	0.248047	0.496094	0.805634	1.1093	1.2648	1.33577	1.44635	1.58827	1.78869	2.04545	2.34007	2.77325	4.47173
0	0	0	0	0	0	0	0	0	0	0	0	0	0	0	0	0.248047	0.248047	0.496094	0.885808	1.24023	1.2648	1.33577	1.44635	1.58827	1.93731	2.10475	2.34007	2.77325	4.47173
0	0	0	0	0	0	0	0	0	0	0	0	0	0	0	0	0.248047	0.248047	0.496094	0.948792	1.24023	1.2648	1.33577	1.44635	1.58827	1.93731	2.10475	2.35318	2.77325	5.5465
0	0	0	0	0	0	0	0	0	0	0	0	0	0	0	0	0.248047	0.248047	0.496094	0.992188	1.24023	1.29456	1.33577	1.48828	1.58827	1.93731	2.13378	2.39698	2.77325	5.5465
0	0	0	0	0	0	0	0	0	0	0	0	0	0	0	0	0.248047	0.248047	0.496094	0.992188	1.24023	1.33577	1.37015	1.48828	1.73633	1.93731	2.13378	2.48047	2.90331	6.20117
0	0	0	0	0	0	0	0	0	0	0	0	0	0	0	0.231873	0.248047	0.248047	0.496094	0.992188	1.24023	1.33577	1.40317	1.50881	1.75396	1.93731	2.13378	2.48047	2.98688	8.31975
0	0	0	0	0	0	0	0	0	0	0	0	0	0	0	0.248047	0.248047	0.248047	0.496094	0.992188	1.24023	1.33577	1.40317	1.56879	1.75396	1.93731	2.13378	2.5538	2.98688	10.5237
0	0	0	0	0	0	0	0	0	0	0	0	0	0	0	0.248047	0.248047	0.248047	0.496094	1.02272	1.2648	1.33577	1.44635	1.57328	1.75396	1.99982	2.13378	2.5538	2.99716	14.5166
0	0	0	0	0	0	0	0	0	0	0	0	0	0	0	0.248047	0.248047	0.248047	0.496094	1.02272	1.2648	1.33577	1.44635	1.58827	1.75396	1.99982	2.22972	2.65506	3.0278	16.3127
0	0	0	0	0	0	0	0	0	0	0	0	0	0	0	0.248047	0.248047	0.248047	0.496094	1.02272	1.2648	1.33577	1.44635	1.58827	1.78869	1.99982	2.28688	2.6632	3.17655	21.084
0	0	0	0	0	0	0	0	0	0	0	0	0	0	0	0.248047	0.248047	0.248047	0.496094	1.05237	1.2648	1.33577	1.44635	1.58827	1.83436	2.04545	2.28688	2.67155	3.17655	36.0522
0	0	0	0	0	0	0	0	0	0	0	0	0	0	0	0.248047	0.248047	0.248047	0.496094	1.05237	1.2648	1.33577	1.44635	1.58827	1.88907	2.08846	2.28688	2.67155	3.22461	38.307
0	0	0	0	0	0	0	0	0	0	0	0	0	0	0	0.248047	0.248047	0.248047	0.496094	1.06053	1.2648	1.33577	1.44635	1.58827	1.88907	2.10475	2.34007	2.68304	3.26255	44.4586
0	0	0	0	0	0	0	0	0	0	0	0	0	0	0	0.248047	0.248047	0.248047	0.496094	1.1093	1.2648	1.33577	1.44635	1.58827	1.93731	2.10475	2.34007	2.68304	3.3738	50.895
0	0	0	0	0	0	0	0	0	0	0	0	0	0	0	0.248047	0.248047	0.248047	0.55465	1.1093	1.28785	1.33577	1.44635	1.58827	1.93731	2.11931	2.35318	2.69365	3.50791	59.2853
0	0	0	0	0	0	0	0	0	0	0	0	0	0	0	0.248047	0.248047	0.248047	0.55465	1.1093	1.33577	1.33577	1.48828	1.66395	1.93731	2.11931	2.38161	2.77325	3.50791	68.3143
0	0	0	0	0	0	0	0	0	0	0	0	0	0	0	0.248047	0.248047	0.248047	0.55465	1.1093	1.33577	1.33577	1.50881	1.66395	1.93731	2.13378	2.42299	2.77325	3.55149	68.7967
0	0	0	0	0	0	0	0	0	0	0	0	0	0	0.0680111	0.248047	0.248047	0.248047	0.55465	1.1093	1.33577	1.33577	1.50881	1.73633	1.93731	2.13378	2.44298	2.77325	3.75363	69.8176
0	0	0	0	0	0	0	0	0	0	0	0	0	0	0.0711694	0.248047	0.248047	0.248047	0.55465	1.1093	1.33577	1.40317	1.50881	1.75396	1.98438	2.13378	2.44298	2.77325	3.79439
0	0	0	0	0	0	0	0	0	0	0	0	0	0	0.0887947	0.248047	0.248047	0.332075	0.55465	1.24023	1.33577	1.44635	1.56879	1.75396	1.99982	2.13378	2.45554	2.77325	3.92197
0	0	0	0	0	0	0	0	0	0	0	0	0	0	0.0957352	0.248047	0.248047	0.350791	0.579645	1.24023	1.33577	1.44635	1.56879	1.75396	1.99982	2.13378	2.46462	2.82817	3.92197
0	0	0	0	0	0	0	0	0	0	0	0	0	0	0.112117	0.248047	0.248047	0.350791	0.638525	1.24023	1.33577	1.44635	1.58827	1.75396	1.99982	2.17216	2.48047	2.82817	3.92197
0	0	0	0	0	0	0	0	0	0	0	0	0	0	0.113611	0.248047	0.248047	0.350791	0.640346	1.24023	1.33577	1.44635	1.58827	1.78869	1.99982	2.2186	2.48047	2.8927	3.92197
0	0	0	0	0	0	0	0	0	0	0	0	0	0	0.141765	0.248047	0.248047	0.350791	0.677074	1.24023	1.33577	1.44635	1.58827	1.78869	2.04545	2.23017	2.52959	2.8927	3.92197
0	0	0	0	0	0	0	0	0	0	0	0	0	0	0.142153	0.248047	0.248047	0.350791	0.701583	1.24023	1.33577	1.44635	1.58827	1.80581	2.04545	2.24616	2.52959	2.98688	4.00732
0	0	0	0	0	0	0	0	0	0	0	0	0	0	0.150404	0.248047	0.248047	0.350791	0.701583	1.24023	1.33577	1.44635	1.58827	1.88907	2.09596	2.28688	2.5538	2.98688	4.06827
0	0	0	0	0	0	0	0	0	0	0	0	0	0	0.15575	0.248047	0.248047	0.350791	0.744141	1.24023	1.33577	1.44635	1.58827	1.93731	2.10475	2.28688	2.56663	2.99716	4.26756
0	0	0	0	0	0	0	0	0	0	0	0	0	0.0493348	0.181669	0.248047	0.248047	0.350791	0.744141	1.24023	1.33577	1.44635	1.66395	1.93731	2.11931	2.28688	2.61664	2.99716	4.47173
0	0	0	0	0	0	0	0	0	0	0	0	0	0.0596701	0.196421	0.248047	0.248047	0.350791	0.744141	1.24023	1.33577	1.44635	1.66395	1.93731	2.12737	2.34007	2.64552	2.99716	4.47173
0	0	0	0	0	0	0	0	0	0	0	0	0	0.0736396	0.208178	0.248047	0.264561	0.388078	0.744141	1.24023	1.33577	1.44635	1.66395	1.93731	2.13378	2.34007	2.67155	3.0278	4.89225
0	0	0	0	0	0	0	0	0	0	0	0	0	0.0761704	0.22458	0.248047	0.336886	0.496094	0.744141	1.24023	1.33577	1.50881	1.73633	1.93774	2.13378	2.35318	2.67155	3.0278	5.44009
0	0	0	0	0	0	0	0	0	0	0	0	0	0.0780008	0.240952	0.248047	0.350791	0.496094	0.744141	1.24023	1.33577	1.50881	1.7497	1.98438	2.13378	2.35318	2.68304	3.06817	5.66178
0	0	0	0	0	0	0	0	0	0	0	0	0	0.0869177	0.242547	0.248047	0.350791	0.496094	0.744141	1.24023	1.33577	1.50881	1.75239	1.99982	2.13378	2.37439	2.73977	3.17655	5.71047
0	0	0	0	0	0	0	0	0	0	0	0	0	0.115209	0.248047	0.248047	0.350791	0.496094	0.744141	1.24023	1.33577	1.50881	1.75396	1.99982	2.13378	2.40719	2.77325	3.22461	5.99432
0	0	0	0	0	0	0	0	0	0	0	0	0	0.11561	0.248047	0.248047	0.350791	0.496094	0.744141	1.24023	1.33577	1.54829	1.75396	1.99982	2.13378	2.4154	2.77325	3.22461	6.70186
0	0	0	0	0	0	0	0	0	0	0	0	0	0.120585	0.248047	0.248047	0.350791	0.496094	0.744141	1.24023	1.40317	1.56879	1.75396	1.99982	2.13378	2.45554	2.77325	3.3738	7.43313
0	0	0	0	0	0	0	0	0	0	0	0	0	0.121524	0.248047	0.248047	0.350791	0.496094	0.744141	1.24023	1.40317	1.56879	1.75396	1.99982	2.14845	2.48047	2.77325	3.4815	7.55627
0	0	0	0	0	0	0	0	0	0	0	0	0	0.135022	0.248047	0.248047	0.350791	0.496094	0.744141	1.24023	1.40341	1.56879	1.75396	1.99982	2.1538	2.48047	2.77325	3.4815	9.97753
0	0	0	0	0	0	0	0	0	0	0	0	0	0.13658	0.248047	0.248047	0.350791	0.496094	0.784393	1.24023	1.44635	1.57699	1.78869	2.01872	2.24616	2.49284	2.77325	3.50791	11.0763
0	0	0	0	0	0	0	0	0	0	0	0	0	0.138391	0.248047	0.248047	0.374751	0.496094	0.784393	1.24023	1.44635	1.58827	1.78869	2.03564	2.2741	2.52821	2.77325	3.55149	12.5356
0	0	0	0	0	0	0	0	0	0	0	0	0	0.155145	0.248047	0.248047	0.435542	0.496094	0.784393	1.24023	1.44635	1.58827	1.78869	2.04377	2.28688	2.52959	2.82817	3.68748	13.3784
0	0	0	0	0	0	0	0	0	0	0	0	0	0.158655	0.248047	0.248047	0.456182	0.496094	0.83528	1.24023	1.44635	1.58827	1.80581	2.04545	2.28688	2.52959	2.82817	3.68748	14.62
0	0	0	0	0	0	0	0	0	0	0	0	0	0.164329	0.248047	0.248047	0.496094	0.496094	0.84406	1.24023	1.44635	1.58827	1.80581	2.04545	2.28688	2.52959	2.8927	3.68748	15.6643
0	0	0	0	0	0	0	0	0	0	0	0	0	0.165646	0.248047	0.248047	0.496094	0.496094	0.848202	1.24023	1.44635	1.58827	1.80581	2.04545	2.28688	2.5312	2.8927	3.68748	20.3414
0	0	0	0	0	0	0	0	0	0	0	0	0	0.166149	0.248047	0.248047	0.496094	0.496094	0.865328	1.24023	1.44635	1.58827	1.88907	2.08116	2.28688	2.5538	2.98688	3.79439	20.3535
0	0	0	0	0	0	0	0	0	0	0	0	0	0.172145	0.248047	0.248047	0.496094	0.496094	0.893742	1.25458	1.44635	1.58827	1.88907	2.10475	2.34007	2.5538	2.99716	3.85072	34.876
0	0	0	0	0	0	0	0	0	0	0	0	0	0.17943	0.248047	0.248047	0.496094	0.496094	0.894346	1.2648	1.44635	1.66395	1.88907	2.11931	2.34007	2.57089	2.99716	3.87462	37.5142
0	0	0	0	0	0	0	0	0	0	0	0	0	0.185102	0.248047	0.260497	0.496094	0.496094	0.901905	1.2648	1.44635	1.66395	1.88907	2.11931	2.34007	2.58969	2.99716	3.92197	38.1871
0	0	0	0	0	0	0	0	0	0	0	0	0	0.186344	0.248047	0.268496	0.496094	0.496094	0.992188	1.2648	1.44635	1.66395	1.88907	2.11931	2.35244	2.58969	3.0278	3.92197	38.3567
0	0	0	0	0	0	0	0	0	0	0	0	0	0.191473	0.248047	0.276732	0.496094	0.55465	0.992188	1.2648	1.47198	1.66395	1.90276	2.13378	2.35318	2.67155	3.0278	4.00732	41.5536
0	0	0	0	0	0	0	0	0	0	0	0	0.0405928	0.196193	0.248047	0.294988	0.496094	0.55465	0.992188	1.2648	1.50631	1.73177	1.92267	2.13378	2.35318	2.68304	3.10802	4.06827	44.8602
0	0	0	0	0	0	0	0	0	0	0	0	0.047464	0.198757	0.248047	0.295341	0.496094	0.55465	0.992188	1.2648	1.50881	1.73633	1.93731	2.13378	2.35318	2.77325	3.13757	4.06827	49.1108
0	0	0	0	0	0	0	0	0	0	0	0	0.0538332	0.200099	0.248047	0.320461	0.496094	0.55465	0.992188	1.2648	1.50881	1.75396	1.93731	2.13378	2.35318	2.77325	3.15712	4.09089	49.3239
0	0	0	0	0	0	0	0	0	0	0	0	0.0611843	0.206612	0.248047	0.328645	0.496094	0.55465	0.992188	1.2648	1.53995	1.75396	1.93731	2.13378	2.42553	2.77325	3.17655	4.23863	57.309
0	0	0	0	0	0	0	0	0	0	0	0	0.0615686	0.217734	0.248047	0.328776	0.496094	0.55465	0.992413	1.2648	1.55289	1.75396	1.93731	2.13378	2.4399	2.77325	3.22461	4.26756	57.6516
0	0	0	0	0	0	0	0	0	0	0	0	0.074233	0.22236	0.248047	0.339431	0.496094	0.55465	1.00302	1.2648	1.56879	1.75396	1.95002	2.13378	2.45231	2.77325	3.22461	4.26756	65.4552
0	0	0	0	0	0	0	0	0	0	0	0	0.0775344	0.225121	0.248047	0.350791	0.496094	0.57083	1.02272	1.2648	1.56879	1.75396	1.98438	2.13378	2.48047	2.77325	3.26255	4.47173	65.7249
0	0	0	0	0	0	0	0	0	0	0	0	0.0897444	0.225826	0.248047	0.350791	0.496094	0.580576	1.02272	1.2648	1.56879	1.75396	1.99982	2.13378	2.48047	2.77325	3.30936	5.23255	65.8227
0	0	0	0	0	0	0	0	0	0	0	0	0.0934688	0.226059	0.248047	0.350791	0.496094	0.619073	1.02272	1.32791	1.57559	1.75396	1.99982	2.14392	2.48047	2.77325	3.33713	5.32579	67.5207
0	0	0	0	0	0	0	0	0	0	0	0	0.0973758	0.233782	0.248047	0.350791	0.496094	0.632005	1.02272	1.33577	1.58827	1.75396	1.99982	2.18213	2.48734	2.82817	3.3738	5.34309	68.1587
0	0	0	0	0	0	0	0	0	0	0	0	0.101766	0.233903	0.248047	0.350791	0.496094	0.645769	1.02272	1.33577	1.58827	1.75396	1.99982	2.23242	2.49284	2.82817	3.45489	5.5465	68.4187
0	0	0	0	0	0	0	0	0	0	0	0	0.128243	0.238227	0.248047	0.350791	0.496094	0.657174	1.02272	1.33577	1.58827	1.75396	1.99982	2.24616	2.52959	2.8927	3.45489	5.7854
0	0	0	0	0	0	0	0	0	0	0	0	0.132722	0.247916	0.248047	0.350791	0.496094	0.692737	1.02272	1.33577	1.58827	1.77955	1.99982	2.24616	2.5538	2.8927	3.45489	6.20117
0	0	0	0	0	0	0	0	0	0	0	0	0.133843	0.248047	0.248047	0.350791	0.496975	0.701583	1.02272	1.33577	1.58827	1.78869	1.99982	2.28688	2.5538	2.8927	3.47266	6.44922
0	0	0	0	0	0	0	0	0	0	0	0	0.134006	0.248047	0.248047	0.350791	0.523292	0.707013	1.02272	1.33577	1.58827	1.78869	2.03659	2.28688	2.5538	2.90331	3.4815	6.6558
0	0	0	0	0	0	0	0	0	0	0	0	0.134488	0.248047	0.248047	0.350791	0.535213	0.744141	1.03517	1.33577	1.58827	1.78869	2.0413	2.28688	2.5538	2.97656	3.4815	6.67887
0	0	0	0	0	0	0	0	0	0	0	0	0.137086	0.248047	0.248047	0.350791	0.551703	0.744141	1.0483	1.33577	1.66395	1.79207	2.04443	2.2987	2.5538	2.98688	3.50791	7.02459
0	0	0	0	0	0	0	0	0	0	0	0	0.13827	0.248047	0.248047	0.357202	0.55465	0.744141	1.05237	1.33577	1.66395	1.80581	2.04545	2.31665	2.58969	2.98688	3.50791	7.05954
0	0	0	0	0	0	0	0	0	0	0	0	0.140126	0.248047	0.248047	0.363273	0.55465	0.744141	1.05237	1.33577	1.66395	1.80581	2.10475	2.34007	2.63677	2.99716	3.50791	9.67383
0	0	0	0	0	0	0	0	0	0	0	0	0.146158	0.248047	0.248047	0.383377	0.55465	0.744141	1.05237	1.33577	1.66395	1.81449	2.10475	2.34007	2.67155	2.99716	3.55149	10.179
0	0	0	0	0	0	0	0	0	0	0	0	0.147623	0.248047	0.248047	0.396623	0.55465	0.744141	1.05237	1.33577	1.71804	1.88907	2.11774	2.34007	2.67155	2.99716	3.68748	11.1428
0	0	0	0	0	0	0	0	0	0	0	0	0.152439	0.248047	0.248047	0.406384	0.55465	0.744141	1.05237	1.33577	1.73633	1.88907	2.11875	2.34007	2.68304	3.01762	3.79439	11.3127
0	0	0	0	0	0	0	0	0	0	0	0	0.160182	0.248047	0.248047	0.4082	0.55465	0.744141	1.05237	1.33577	1.73633	1.90108	2.11931	2.34007	2.68304	3.0278	3.87462	11.87
0	0	0	0	0	0	0	0	0	0	0	0	0.167948	0.248047	0.248047	0.41904	0.55465	0.744141	1.07624	1.33577	1.73633	1.93731	2.11931	2.34249	2.72852	3.06817	3.87462	12.6504
0	0	0	0	0	0	0	0	0	0	0	0	0.173422	0.248047	0.248047	0.479662	0.55465	0.744141	1.08148	1.33577	1.75396	1.93731	2.13378	2.3495	2.77325	3.10802	3.92197	13.2676
0	0	0	0	0	0	0	0	0	0	0	0	0.17409	0.248047	0.248047	0.483003	0.55465	0.744141	1.09105	1.33577	1.75396	1.93731	2.13378	2.35318	2.77325	3.15712	3.92197	14.0426
0	0	0	0	0	0	0	0	0	0	0	0	0.183283	0.248047	0.248047	0.484096	0.55465	0.744141	1.1093	1.33577	1.75396	1.93731	2.13378	2.36779	2.77325	3.17655	3.92197	14.4486
0	0	0	0	0	0	0	0	0	0	0	0	0.183682	0.248047	0.248047	0.496094	0.55465	0.744141	1.1093	1.33577	1.75396	1.93989	2.13378	2.44298	2.77325	3.17655	4.00732	19.602
0	0	0	0	0	0	0	0	0	0	0	0	0.217293	0.248047	0.248047	0.496094	0.55465	0.744141	1.1093	1.33577	1.75396	1.9597	2.13378	2.44298	2.77325	3.17655	4.06827	19.6725
0	0	0	0	0	0	0	0	0	0	0	0.0415175	0.223127	0.248047	0.248047	0.496094	0.55465	0.7552	1.1093	1.33577	1.75396	1.97612	2.13378	2.44298	2.77325	3.22461	4.06827	19.8453
0	0	0	0	0	0	0	0	0	0	0	0.0483981	0.2258	0.248047	0.248047	0.496094	0.55465	0.784393	1.1093	1.33577	1.75396	1.98438	2.13378	2.45554	2.77325	3.22461	4.23863	33.967
0	0	0	0	0	0	0	0	0	0	0	0.0605678	0.226756	0.248047	0.248047	0.496094	0.569165	0.784393	1.1093	1.33836	1.75396	1.98438	2.17135	2.48047	2.77325	3.22461	4.26756	36.2768
0	0	0	0	0	0	0	0	0	0	0	0.104975	0.23144	0.248047	0.248047	0.496094	0.59747	0.784393	1.1093	1.36559	1.75396	1.98438	2.19348	2.48047	2.82817	3.22461	4.47173	37.1988
0	0	0	0	0	0	0	0	0	0	0	0.105401	0.231553	0.248047	0.248047	0.496094	0.598005	0.784393	1.1152	1.38795	1.75396	1.9919	2.2186	2.48047	2.82817	3.23414	4.47173	37.3967
0	0	0	0	0	0	0	0	0	0	0	0.113273	0.239	0.248047	0.248047	0.496094	0.598671	0.784393	1.13685	1.4183	1.75396	1.99982	2.2186	2.52959	2.82817	3.23414	4.47173	37.9512
0	0	0	0	0	0	0	0	0	0	0	0.117626	0.242617	0.248047	0.248047	0.496094	0.60428	0.784393	1.17105	1.44635	1.75396	1.99982	2.2186	2.52959	2.82817	3.30936	4.55354	38.2491
0	0	0	0	0	0	0	0	0	0	0	0.120815	0.24269	0.248047	0.248047	0.496094	0.619803	0.784393	1.17961	1.44635	1.764	1.99982	2.2186	2.5538	2.8927	3.3279	5.25602	39.2581
0	0	0	0	0	0	0	0	0	0	0	0.129669	0.246516	0.248047	0.248047	0.496094	0.629298	0.790954	1.20534	1.44635	1.78869	1.99982	2.23242	2.5538	2.8927	3.3279	5.44009	41.9111
0	0	0	0	0	0	0	0	0	0	0	0.132888	0.247581	0.248047	0.248047	0.496094	0.630841	0.791101	1.21153	1.44635	1.78869	1.99982	2.23242	2.5538	2.8927	3.33713	5.66178	45.4948
0	0	0	0	0	0	0	0	0	0	0	0.148876	0.248047	0.248047	0.248047	0.496094	0.632243	0.840708	1.21425	1.44635	1.78869	1.99982	2.23242	2.5538	2.8927	3.3738	5.71047	47.1974
0	0	0	0	0	0	0	0	0	0	0	0.150463	0.248047	0.248047	0.257932	0.496094	0.641962	0.848324	1.23272	1.44635	1.80063	1.99982	2.24616	2.5538	2.90331	3.47266	5.76942	47.5325
0	0	0	0	0	0	0	0	0	0	0	0.155343	0.248047	0.248047	0.261886	0.496094	0.664356	0.885997	1.24023	1.44635	1.80354	1.99982	2.2649	2.5538	2.97656	3.4815	5.89601	47.754
0	0	0	0	0	0	0	0	0	0	0	0.156673	0.248047	0.248047	0.263433	0.496094	0.685513	0.894346	1.24023	1.44635	1.80581	2.0104	2.2681	2.5538	2.97656	3.50791	5.91684	55.405
0	0	0	0	0	0	0	0	0	0	0.0450767	0.158511	0.248047	0.248047	0.276892	0.496094	0.686521	0.894346	1.24023	1.44635	1.80581	2.02477	2.28688	2.58969	2.97656	3.50791	5.99432	55.6737
0	0	0	0	0	0	0	0	0	0	0.0701655	0.187288	0.248047	0.248047	0.287173	0.496094	0.689129	0.894346	1.24023	1.45254	1.81799	2.04545	2.28688	2.63677	2.98688	3.50791	6.20117	56.0849
0	0	0	0	0	0	0	0	0	0	0.0841303	0.190577	0.248047	0.248047	0.300291	0.496094	0.695743	0.894346	1.24023	1.48158	1.83216	2.04545	2.28688	2.67155	2.98688	3.50791	6.51094	62.7711
0	0	0	0	0	0	0	0	0	0	0.107336	0.19091	0.248047	0.248047	0.305005	0.496094	0.701583	0.894346	1.24023	1.48828	1.8838	2.09066	2.28688	2.68304	2.98688	3.66237	6.7476	62.8656
0	0	0	0	0	0	0	0	0	0	0.1144	0.204055	0.248047	0.248047	0.306342	0.496094	0.701583	0.894346	1.24023	1.48828	1.88907	2.09722	2.28688	2.68304	2.98688	3.7207	6.7749	63.0742
0	0	0	0	0	0	0	0	0	0	0.137005	0.205981	0.248047	0.248047	0.324559	0.496094	0.701583	0.894346	1.24023	1.48828	1.88907	2.10475	2.34007	2.68304	2.99716	3.79439	7.36662	63.1356
0	0	0	0	0	0	0	0	0	0	0.15505	0.209977	0.248047	0.248047	0.324669	0.496094	0.701583	0.894346	1.24023	1.49937	1.88907	2.10475	2.34007	2.72852	2.99716	3.85072	9.42904	64.8053
0	0	0	0	0	0	0	0	0	0	0.155728	0.214781	0.248047	0.248047	0.332133	0.496094	0.701583	0.894346	1.24023	1.50881	1.88907	2.10475	2.34007	2.72852	2.99716	3.85072	9.54255	65.1953
0	0	0	0	0	0	0	0	0	0	0.157183	0.215211	0.248047	0.248047	0.341724	0.496094	0.701583	0.894346	1.24023	1.52512	1.89009	2.10475	2.34007	2.73977	2.99716	3.87462	9.6324	66.1114
0	0	0	0	0	0	0	0	0	0	0.157689	0.229235	0.248047	0.248047	0.346797	0.496094	0.701583	0.894346	1.24023	1.55033	1.9125	2.11931	2.34007	2.73977	2.99716	3.87462	10.1971	66.7831
0	0	0	0	0	0	0	0	0	0	0.166921	0.238946	0.248047	0.248047	0.347222	0.496094	0.701583	0.894346	1.24023	1.55777	1.93731	2.11931	2.35318	2.73977	3.0278	3.87462	10.7321	67.1016
0	0	0	0	0	0	0	0	0	0	0.17031	0.240291	0.248047	0.248047	0.350791	0.496094	0.70239	0.908048	1.24023	1.5596	1.93731	2.13378	2.35318	2.77325	3.06817	3.92197	11.2472	85.1527
0	0	0	0	0	0	0	0	0	0	0.172802	0.240847	0.248047	0.248047	0.350791	0.496094	0.706345	0.91007	1.24023	1.56879	1.93731	2.13378	2.44298	2.77325	3.10802	4.00732	11.9809
0	0	0	0	0	0	0	0	0	0	0.174892	0.246511	0.248047	0.248047	0.350791	0.496094	0.707134	0.932944	1.24023	1.56879	1.93731	2.13378	2.48047	2.77325	3.17655	4.06827	12.1619
0	0	0	0	0	0	0	0	0	0	0.177949	0.248047	0.248047	0.248047	0.350791	0.496094	0.717873	0.937065	1.24023	1.57297	1.94941	2.13378	2.48047	2.77325	3.17655	4.06827	12.6309
0	0	0	0	0	0	0	0	0	0	0.178619	0.248047	0.248047	0.248047	0.350791	0.496094	0.720657	0.937852	1.24023	1.58607	1.98438	2.13378	2.48047	2.77325	3.17655	4.06827	12.769
0	0	0	0	0	0	0	0	0	0	0.179199	0.248047	0.248047	0.248047	0.350791	0.496094	0.725156	0.947675	1.24023	1.58827	1.98438	2.13378	2.49284	2.77325	3.22461	4.15802	12.865
0	0	0	0	0	0	0	0	0	0	0.181536	0.248047	0.248047	0.248047	0.350791	0.496094	0.736159	0.956732	1.24023	1.58827	1.98537	2.13378	2.49284	2.77325	3.22461	4.26756	13.7213
0	0	0	0	0	0	0	0	0	0	0.186305	0.248047	0.248047	0.248047	0.350791	0.496094	0.744141	0.958011	1.24023	1.58827	1.99982	2.18485	2.49284	2.77325	3.23414	4.26756	18.9102
0	0	0	0	0	0	0	0	0	0	0.187577	0.248047	0.248047	0.248047	0.350791	0.496499	0.744141	0.962438	1.24023	1.58827	1.99982	2.2186	2.52959	2.77325	3.26255	4.47173	19.048
0	0	0	0	0	0	0	0	0	0	0.207375	0.248047	0.248047	0.248047	0.350791	0.50453	0.744141	0.967286	1.24023	1.58827	1.99982	2.2186	2.5538	2.77325	3.30936	4.89225	19.1061
0	0	0	0	0	0	0	0	0	0	0.207946	0.248047	0.248047	0.248047	0.350791	0.508018	0.744141	0.973433	1.24023	1.58827	1.99982	2.23242	2.5538	2.80633	3.3279	5.02257	19.5973
0	0	0	0	0	0	0	0	0	0	0.218012	0.248047	0.248047	0.248047	0.350791	0.511671	0.744141	0.98167	1.24023	1.58827	1.99982	2.24616	2.5538	2.80633	3.33713	5.17937	32.7995
0	0	0	0	0	0	0	0	0	0	0.220702	0.248047	0.248047	0.248047	0.350791	0.52168	0.744141	0.985366	1.24023	1.58827	1.99982	2.24616	2.5538	2.82817	3.33713	5.25602	34.6103
0	0	0	0	0	0	0	0	0	0	0.230537	0.248047	0.248047	0.248047	0.357764	0.524841	0.744141	0.992188	1.24904	1.58827	1.99982	2.24616	2.5538	2.82817	3.4815	5.34309	35.3282
0	0	0	0	0	0	0	0	0	0	0.233259	0.248047	0.248047	0.248047	0.362311	0.526378	0.744141	0.992188	1.24955	1.58827	2.01427	2.28688	2.5538	2.82817	3.50791	5.41743	36.1638
0	0	0	0	0	0	0	0	0	0	0.234428	0.248047	0.248047	0.248047	0.366057	0.539362	0.744141	0.992188	1.25132	1.58827	2.01659	2.28688	2.58969	2.8927	3.50791	5.5465	36.3073
0	0	0	0	0	0	0	0	0	0	0.234603	0.248047	0.248047	0.248047	0.378636	0.54117	0.744141	0.992188	1.26378	1.58827	2.04545	2.28688	2.58969	2.8927	3.50791	5.57416	37.1657
0	0	0	0	0	0	0	0	0	0	0.238903	0.248047	0.248047	0.248047	0.379433	0.547936	0.744141	0.992188	1.2648	1.58827	2.04545	2.28688	2.63677	2.8927	3.50791	5.7854	37.5002
0	0	0	0	0	0	0	0	0	0	0.240946	0.248047	0.248047	0.248047	0.381137	0.55394	0.744141	0.992188	1.2648	1.58827	2.04545	2.28688	2.63677	2.97656	3.50791	5.89601	38.1323
0	0	0	0	0	0	0	0	0	0	0.241912	0.248047	0.248047	0.248047	0.385963	0.55465	0.744141	0.992188	1.2648	1.6226	2.10475	2.28688	2.63677	2.97656	3.50791	5.91684	38.5527
0	0	0	0	0	0	0	0	0	0	0.243937	0.248047	0.248047	0.248047	0.394361	0.55465	0.744141	0.992188	1.2648	1.66395	2.10475	2.34007	2.63677	2.98688	3.7207	6.00458	39.1144
0	0	0	0	0	0	0	0	0	0.0239802	0.24503	0.248047	0.248047	0.248047	0.40464	0.55465	0.744141	0.992188	1.2648	1.66395	2.10475	2.34007	2.63677	2.98688	3.75363	6.10115	42.4972
0	0	0	0	0	0	0	0	0	0.0312748	0.246436	0.248047	0.248047	0.248047	0.413243	0.55465	0.744141	0.992188	1.2648	1.66395	2.10475	2.34007	2.67155	2.99716	3.85072	6.51094	45.301
0	0	0	0	0	0	0	0	0	0.0357766	0.2469	0.248047	0.248047	0.248047	0.427768	0.55465	0.744141	0.992188	1.2648	1.66395	2.10475	2.35318	2.67155	2.99716	3.85072	6.54863	45.615
0	0	0	0	0	0	0	0	0	0.0463708	0.248047	0.248047	0.248047	0.248047	0.442904	0.55465	0.744141	0.992188	1.2648	1.66395	2.11931	2.44298	2.68304	2.99716	3.87462	6.84268	45.955
0	0	0	0	0	0	0	0	0	0.0482553	0.248047	0.248047	0.248047	0.248047	0.456276	0.55465	0.744141	0.992188	1.2648	1.73633	2.11931	2.44298	2.68304	3.01762	3.87462	7.54405	46.0359
0	0	0	0	0	0	0	0	0	0.103017	0.248047	0.248047	0.248047	0.248047	0.458674	0.55465	0.744141	0.992188	1.2648	1.73868	2.13378	2.44298	2.72852	3.01762	3.87462	8.18179	46.0393
0	0	0	0	0	0	0	0	0	0.12439	0.248047	0.248047	0.248047	0.248047	0.459662	0.55465	0.744141	0.992188	1.2648	1.75202	2.13378	2.44298	2.72852	3.17655	3.92197	8.99149	46.6882
0	0	0	0	0	0	0	0	0	0.124865	0.248047	0.248047	0.248047	0.248047	0.470753	0.55465	0.744141	0.994453	1.2648	1.75396	2.13378	2.45554	2.73977	3.17655	3.92197	9.14752	53.1243
0	0	0	0	0	0	0	0	0	0.133763	0.248047	0.248047	0.248047	0.24819	0.472329	0.55892	0.744141	0.996591	1.2648	1.75396	2.13378	2.48047	2.73977	3.17655	3.92197	9.58437	53.7667
0	0	0	0	0	0	0	0	0	0.139238	0.248047	0.248047	0.248047	0.249689	0.489257	0.56416	0.744141	1.00019	1.2648	1.75396	2.13378	2.48047	2.77325	3.17655	4.06827	9.64835	54.1066
0	0	0	0	0	0	0	0	0	0.140655	0.248047	0.248047	0.248047	0.253043	0.489553	0.565741	0.752876	1.02272	1.2648	1.75396	2.13378	2.49284	2.77325	3.22461	4.06827	9.70241	54.7577
0	0	0	0	0	0	0	0	0	0.142737	0.248047	0.248047	0.248047	0.272634	0.490731	0.566693	0.763464	1.02272	1.2648	1.75396	2.13378	2.49284	2.77325	3.22461	4.06827	10.5267	60.1814
0	0	0	0	0	0	0	0	0	0.144219	0.248047	0.248047	0.248047	0.274014	0.493431	0.570867	0.77591	1.02272	1.2648	1.75396	2.13378	2.49284	2.77325	3.23414	4.06827	11.3154	60.2545
0	0	0	0	0	0	0	0	0	0.149077	0.248047	0.248047	0.248047	0.278178	0.496094	0.580549	0.776975	1.02272	1.2648	1.75396	2.2186	2.49284	2.77325	3.26255	4.09089	11.5708	60.2759
0	0	0	0	0	0	0	0	0	0.151791	0.248047	0.248047	0.248047	0.279575	0.496094	0.587499	0.778584	1.02272	1.2648	1.75396	2.23242	2.52959	2.77325	3.30936	4.12832	11.6476	60.4797
0	0	0	0	0	0	0	0	0	0.157954	0.248047	0.248047	0.248047	0.281706	0.496094	0.597429	0.778682	1.02272	1.2648	1.75396	2.24616	2.52959	2.77325	3.30936	4.26756	12.0424	60.5483
0	0	0	0	0	0	0	0	0	0.160398	0.248047	0.248047	0.248047	0.283532	0.496094	0.597452	0.784393	1.02272	1.27637	1.75396	2.24616	2.5538	2.77325	3.30936	4.47173	12.1644	62.1891
0	0	0	0	0	0	0	0	0	0.161423	0.248047	0.248047	0.248047	0.283637	0.496094	0.600736	0.784393	1.02272	1.27853	1.75396	2.24616	2.5538	2.77325	3.33713	4.8162	12.3452	62.4566
0	0	0	0	0	0	0	0	0	0.163606	0.248047	0.248047	0.248047	0.28796	0.496094	0.603479	0.784393	1.02272	1.28334	1.75396	2.24616	2.5538	2.80633	3.33713	4.87335	13.4792	63.388
0	0	0	0	0	0	0	0	0	0.166347	0.248047	0.248047	0.248047	0.291752	0.496094	0.604268	0.784393	1.02272	1.28878	1.75396	2.24616	2.5538	2.8927	3.3738	5.02257	13.5974	64.1526
0	0	0	0	0	0	0	0	0	0.172814	0.248047	0.248047	0.248047	0.301227	0.496094	0.610582	0.784393	1.02272	1.29729	1.75396	2.24616	2.5538	2.8927	3.50791	5.11362	18.2765	64.464
0	0	0	0	0	0	0	0	0	0.175919	0.248047	0.248047	0.248047	0.314836	0.496094	0.610829	0.784393	1.02412	1.29848	1.75396	2.28688	2.58969	2.98688	3.50791	5.17937	18.4157	65.0365
0	0	0	0	0	0	0	0	0	0.176783	0.248047	0.248047	0.248047	0.318261	0.496094	0.617562	0.784393	1.02741	1.316	1.75396	2.28688	2.58969	2.98688	3.50791	5.23255	18.5373	65.5989
0	0	0	0	0	0	0	0	0	0.185069	0.248047	0.248047	0.248047	0.32844	0.496094	0.621279	0.784393	1.03357	1.32019	1.75396	2.28688	2.63677	2.98688	3.50791	5.25602	18.8581	82.009
0	0	0	0	0	0	0	0	0	0.194212	0.248047	0.248047	0.248047	0.32858	0.496094	0.634513	0.784393	1.0454	1.32828	1.75396	2.28688	2.63677	2.98688	3.50791	5.30843	19.8453	82.3818
0	0	0	0	0	0	0	0	0	0.196812	0.248047	0.248047	0.248047	0.341782	0.496094	0.654418	0.784393	1.05237	1.33577	1.75396	2.34007	2.63677	2.99716	3.57738	5.44009	31.362
0	0	0	0	0	0	0	0	0	0.199251	0.248047	0.248047	0.248047	0.343705	0.496094	0.657767	0.784393	1.05237	1.33577	1.75396	2.34007	2.67155	2.99716	3.57738	5.65634	32.6255
0	0	0	0	0	0	0	0	0	0.201618	0.248047	0.248047	0.248047	0.344922	0.496094	0.671115	0.784393	1.05237	1.33577	1.75396	2.35318	2.67155	2.99716	3.68748	5.66178	32.8369
0	0	0	0	0	0	0	0	0	0.202591	0.248047	0.248047	0.248047	0.345496	0.496094	0.675082	0.784393	1.05237	1.33577	1.75396	2.44298	2.68304	3.01762	3.68748	5.7854	34.5008
0	0	0	0	0	0	0	0	0	0.202806	0.248047	0.248047	0.248047	0.346068	0.496094	0.687703	0.799442	1.05237	1.33577	1.75396	2.44298	2.68304	3.01762	3.7207	5.88033	34.9473
0	0	0	0	0	0	0	0	0	0.204984	0.248047	0.248047	0.248047	0.348941	0.496094	0.689525	0.800572	1.05237	1.33577	1.75431	2.44298	2.68304	3.0278	3.7207	5.91684	35.1527
0	0	0	0	0	0	0	0	0	0.206613	0.248047	0.248047	0.248047	0.350791	0.496094	0.691186	0.817416	1.05413	1.33577	1.77147	2.44298	2.68304	3.06817	3.72896	6.10115	35.5703
0	0	0	0	0	0	0	0	0	0.207003	0.248047	0.248047	0.248047	0.350791	0.496094	0.691229	0.817416	1.06247	1.33577	1.77189	2.44298	2.73977	3.13757	3.79439	6.32398	35.942
0	0	0	0	0	0	0	0	0	0.207428	0.248047	0.248047	0.248047	0.350791	0.496094	0.699364	0.825845	1.07308	1.33577	1.78186	2.44298	2.77325	3.13757	3.85072	6.51094	36.7185
0	0	0	0	0	0	0	0	0	0.209256	0.248047	0.248047	0.248047	0.350791	0.496094	0.701583	0.829873	1.07447	1.33577	1.78623	2.45554	2.77325	3.17655	3.85072	7.01583	36.9457
0	0	0	0	0	0	0	0	0	0.211094	0.248047	0.248047	0.248047	0.350791	0.496094	0.701583	0.850738	1.07829	1.33577	1.78869	2.48047	2.77325	3.17655	3.87462	7.21045	37.2731
0	0	0	0	0	0	0	0	0	0.212142	0.248047	0.248047	0.248047	0.350791	0.496094	0.701583	0.865991	1.09468	1.33577	1.78869	2.49284	2.77325	3.17655	3.87462	7.32474	38.0443
0	0	0	0	0	0	0	0	0	0.212385	0.248047	0.248047	0.248047	0.350791	0.496094	0.701583	0.869188	1.10721	1.33577	1.78913	2.49284	2.77325	3.17655	3.87462	7.56035	38.2676
0	0	0	0	0	0	0	0	0	0.213157	0.248047	0.248047	0.248047	0.350791	0.496094	0.701583	0.875468	1.1093	1.33577	1.80581	2.49284	2.77325	3.22461	3.92197	8.7908	39.079
0	0	0	0	0	0	0	0	0	0.214203	0.248047	0.248047	0.248047	0.350791	0.496094	0.701583	0.883597	1.1093	1.33577	1.80581	2.49284	2.77325	3.23414	4.06827	8.88133	42.9816
0	0	0	0	0	0	0	0	0	0.222453	0.248047	0.248047	0.248047	0.350791	0.496094	0.706417	0.889127	1.1093	1.33577	1.80581	2.52959	2.80633	3.23414	4.06827	9.33724	43.3827
0	0	0	0	0	0	0	0	0	0.22713	0.248047	0.248047	0.248047	0.350791	0.496094	0.707014	0.894346	1.1093	1.33577	1.80581	2.52959	2.82817	3.23414	4.06827	9.72458	43.7161
0	0	0	0	0	0	0	0	0	0.232678	0.248047	0.248047	0.248047	0.350791	0.496094	0.723842	0.894346	1.1093	1.33577	1.82463	2.52959	2.82817	3.26255	4.09089	9.77191	44.033
0	0	0	0	0	0	0	0	0	0.233144	0.248047	0.248047	0.248047	0.350791	0.496094	0.730143	0.894346	1.1093	1.33577	1.8481	2.5538	2.82817	3.30936	4.33195	9.93427	44.9013
0	0	0	0	0	0	0	0	0	0.233525	0.248047	0.248047	0.248047	0.350791	0.496094	0.731444	0.894346	1.1093	1.33577	1.86555	2.5538	2.8927	3.30936	4.41635	9.97753	46.2626
0	0	0	0	0	0	0	0	0	0.239086	0.248047	0.248047	0.248047	0.350791	0.496094	0.744141	0.894346	1.1093	1.33577	1.87326	2.5538	2.8927	3.30936	4.47173	10.2272	46.3164
0	0	0	0	0	0	0	0	0	0.240036	0.248047	0.248047	0.248047	0.350791	0.496094	0.744141	0.894346	1.1093	1.33577	1.87867	2.5538	2.8927	3.33713	4.49232	10.5267	46.4987
0	0	0	0	0	0	0	0	0	0.246283	0.248047	0.248047	0.248047	0.350791	0.496094	0.744141	0.894346	1.11491	1.33577	1.88907	2.5538	2.8927	3.33713	4.52643	10.9871	47.6263
0	0	0	0	0	0	0	0	0	0.246626	0.248047	0.248047	0.248047	0.350791	0.496094	0.744141	0.894346	1.12335	1.33577	1.88907	2.5538	2.8927	3.33713	4.61394	11.9321	50.2257
0	0	0	0	0	0	0	0	0	0.24751	0.248047	0.248047	0.248047	0.350791	0.496094	0.744141	0.894346	1.131	1.33577	1.88907	2.58969	2.8927	3.3738	4.70636	12.1644	51.4851
0	0	0	0	0	0	0	0	0	0.248047	0.248047	0.248047	0.248047	0.350791	0.496094	0.744141	0.901405	1.14722	1.33577	1.88907	2.58969	2.90331	3.3738	4.87335	13.3577	52.199
0	0	0	0	0	0	0	0	0	0.248047	0.248047	0.248047	0.248047	0.354134	0.496094	0.744141	0.901939	1.14792	1.33577	1.91644	2.58969	2.98688	3.50791	4.87335	13.4266	52.7786
0	0	0	0	0	0	0	0	0	0.248047	0.248047	0.248047	0.248047	0.355235	0.496094	0.744141	0.911824	1.1509	1.33577	1.93731	2.58969	2.98688	3.50791	5.02257	13.7571	52.8811
0	0	0	0	0	0	0	0	0	0.248047	0.248047	0.248047	0.248047	0.359473	0.496094	0.744141	0.918126	1.15927	1.33577	1.93731	2.63677	2.98688	3.50791	5.25602	14.206	54.1498
0	0	0	0	0	0	0	0	0	0.248047	0.248047	0.248047	0.248047	0.364935	0.496094	0.744141	0.924864	1.165	1.33577	1.93731	2.63677	2.98688	3.50791	5.34309	17.7575	57.5918
0	0	0	0	0	0	0	0	0	0.248047	0.248047	0.248047	0.248047	0.366111	0.496094	0.744141	0.924993	1.17321	1.33577	1.93731	2.67155	2.99716	3.50791	5.44574	17.7852	57.6163
0	0	0	0	0	0	0	0	0	0.248047	0.248047	0.248047	0.248047	0.366728	0.50234	0.744141	0.928847	1.17748	1.33926	1.93731	2.67155	2.99716	3.50791	5.5465	18.1685	57.6649
0	0	0	0	0	0	0	0	0	0.248047	0.248047	0.248047	0.253895	0.371697	0.507987	0.744141	0.929769	1.18419	1.34108	1.93731	2.67155	2.99716	3.68748	5.57416	18.2006	57.7608
0	0	0	0	0	0	0	0	0.0147609	0.248047	0.248047	0.248047	0.257451	0.374784	0.546077	0.744141	0.942793	1.19348	1.35825	1.93731	2.68304	2.99716	3.68748	5.62361	19.1061	57.829
0	0	0	0	0	0	0	0	0.0282352	0.248047	0.248047	0.248047	0.260344	0.389304	0.548332	0.744141	0.943511	1.19495	1.35837	1.93731	2.68304	2.99716	3.7207	5.65634	20.0933	58.2424
0	0	0	0	0	0	0	0	0.0353521	0.248047	0.248047	0.248047	0.260376	0.395037	0.548895	0.744141	0.949618	1.20193	1.3607	1.93731	2.68304	3.01762	3.7207	5.66178	29.7584	59.7031
0	0	0	0	0	0	0	0	0.0368435	0.248047	0.248047	0.248047	0.261018	0.399614	0.549699	0.744141	0.954504	1.20348	1.36973	1.9519	2.68304	3.01762	3.7207	5.66178	30.218	59.9396
0	0	0	0	0	0	0	0	0.0446736	0.248047	0.248047	0.248047	0.261581	0.405837	0.549897	0.744141	0.971021	1.20393	1.37742	1.98438	2.73977	3.0278	3.75363	5.7854	31.2893	60.7674
0	0	0	0	0	0	0	0	0.0490057	0.248047	0.248047	0.248047	0.267665	0.41797	0.551565	0.744141	0.97193	1.20592	1.38759	1.98438	2.77325	3.0278	3.85072	5.79071	32.729	61.4275
0	0	0	0	0	0	0	0	0.0718807	0.248047	0.248047	0.248047	0.271487	0.420695	0.55465	0.744141	0.980097	1.22368	1.39744	1.99982	2.77325	3.06817	3.85072	6.49201	32.8032	61.7318
0	0	0	0	0	0	0	0	0.0761675	0.248047	0.248047	0.248047	0.278011	0.423454	0.55465	0.744141	0.984262	1.22892	1.40317	1.99982	2.77325	3.06817	3.87462	6.59077	32.8444	62.6617
0	0	0	0	0	0	0	0	0.0773203	0.248047	0.248047	0.248047	0.287032	0.425779	0.55465	0.744141	0.990669	1.23072	1.40317	1.99982	2.77325	3.13757	3.97649	7.02459	33.7243	62.7147
0	0	0	0	0	0	0	0	0.0984681	0.248047	0.248047	0.248047	0.287546	0.434028	0.55465	0.744141	0.992188	1.23874	1.40317	1.99982	2.77325	3.15712	4.03791	7.23175	34.2861	62.8778
0	0	0	0	0	0	0	0	0.104351	0.248047	0.248047	0.248047	0.287993	0.451136	0.55465	0.744412	0.992188	1.23911	1.40317	1.99982	2.77325	3.17655	4.03791	7.2445	35.5019	63.7254
0	0	0	0	0	0	0	0	0.112642	0.248047	0.248047	0.248047	0.289695	0.46344	0.55465	0.748461	0.992188	1.24023	1.40317	1.99982	2.77325	3.17655	4.06827	7.54405	35.7532	79.113
0	0	0	0	0	0	0	0	0.118643	0.248047	0.248047	0.248047	0.292106	0.464208	0.55465	0.771661	0.992188	1.24023	1.41729	1.99982	2.77325	3.23414	4.06827	8.43359	36.0275	79.2392
0	0	0	0	0	0	0	0	0.120423	0.248047	0.248047	0.248047	0.293787	0.470874	0.55465	0.774928	0.992188	1.24023	1.42246	1.99982	2.77325	3.30936	4.06827	8.61048	36.1443	79.6663
0	0	0	0	0	0	0	0	0.123742	0.248047	0.248047	0.248047	0.298737	0.479096	0.55465	0.778885	0.992188	1.24023	1.4328	2.04223	2.82817	3.30936	4.15802	8.76978	36.1638
0	0	0	0	0	0	0	0	0.124448	0.248047	0.248047	0.248047	0.305632	0.48219	0.55465	0.779373	0.992188	1.24023	1.44635	2.04545	2.82817	3.33713	4.22409	8.9469	36.2768
0	0	0	0	0	0	0	0	0.131187	0.248047	0.248047	0.248047	0.308774	0.48339	0.55465	0.780401	0.992188	1.24023	1.44635	2.04545	2.8927	3.33713	4.22409	9.12057	36.58
0	0	0	0	0	0	0	0	0.133464	0.248047	0.248047	0.248047	0.311084	0.489417	0.55465	0.780935	0.992188	1.24023	1.44635	2.04545	2.8927	3.33713	4.28195	9.29762	37.2409
0	0	0	0	0	0	0	0	0.137284	0.248047	0.248047	0.248047	0.311975	0.491632	0.55465	0.784393	0.992188	1.24023	1.44635	2.04637	2.8927	3.33713	4.33195	9.92188	37.2772
0	0	0	0	0	0	0	0	0.137884	0.248047	0.248047	0.248047	0.318887	0.493031	0.55465	0.784393	0.992188	1.24023	1.44635	2.10475	2.8927	3.3738	4.33195	10.0329	39.4948
0	0	0	0	0	0	0	0	0.144141	0.248047	0.248047	0.248047	0.319342	0.495425	0.55465	0.784393	0.992188	1.24023	1.44635	2.11931	2.98688	3.45489	4.41635	10.6516	41.4305
0	0	0	0	0	0	0	0	0.150773	0.248047	0.248047	0.248047	0.325741	0.496094	0.55465	0.784393	0.992188	1.24023	1.44635	2.11931	2.98688	3.47266	4.61394	10.7693	41.7972
0	0	0	0	0	0	0	0	0.15159	0.248047	0.248047	0.248047	0.330041	0.496094	0.55465	0.784393	0.992188	1.24023	1.44635	2.11931	2.98688	3.50791	4.6339	10.8717	42.1315
0	0	0	0	0	0	0	0	0.153358	0.248047	0.248047	0.248047	0.331232	0.496094	0.55465	0.784393	0.992188	1.24023	1.44635	2.11931	2.98688	3.50791	4.73893	11.3236	42.9895
0	0	0	0	0	0	0	0	0.156737	0.248047	0.248047	0.248047	0.335266	0.496094	0.55465	0.784393	0.992188	1.24023	1.44635	2.11931	2.98688	3.50791	4.87335	11.8467	43.3806
0	0	0	0	0	0	0	0	0.158018	0.248047	0.248047	0.248047	0.337753	0.496094	0.55465	0.784393	0.992188	1.24023	1.44635	2.11931	2.99716	3.50791	4.9423	12.711	44.556
0	0	0	0	0	0	0	0	0.158435	0.248047	0.248047	0.248047	0.346602	0.496094	0.55465	0.784393	0.992188	1.24023	1.44635	2.13378	2.99716	3.50791	5.02257	13.824	45.959
0	0	0	0	0	0	0	0	0.162473	0.248047	0.248047	0.248047	0.348185	0.496094	0.55465	0.784393	0.992188	1.24023	1.44635	2.13378	2.99716	3.50791	5.02257	14.3995	46.7442
0	0	0	0	0	0	0	0	0.165213	0.248047	0.248047	0.248047	0.350669	0.496094	0.55465	0.784393	0.992188	1.24023	1.44635	2.13378	2.99716	3.52541	5.23255	14.5356	47.258
0	0	0	0	0	0	0	0	0.16593	0.248047	0.248047	0.248047	0.350791	0.496094	0.561235	0.784393	0.992188	1.24023	1.44635	2.13378	2.99716	3.57738	5.34309	15.4766	47.325
0	0	0	0	0	0	0	0	0.167043	0.248047	0.248047	0.248047	0.350791	0.496094	0.562882	0.784393	0.992188	1.24023	1.44635	2.13378	3.01762	3.68748	5.3546	17.2727	47.9116
0	0	0	0	0	0	0	0	0.168522	0.248047	0.248047	0.248047	0.350791	0.496094	0.571921	0.784393	0.992188	1.24023	1.44635	2.13378	3.0278	3.68748	5.44009	17.4164	48.3182
0	0	0	0	0	0	0	0	0.168922	0.248047	0.248047	0.248047	0.350791	0.496094	0.573379	0.784393	0.992188	1.24023	1.44635	2.2086	3.0278	3.7207	5.44574	17.5396	48.5874
0	0	0	0	0	0	0	0	0.171429	0.248047	0.248047	0.248047	0.350791	0.496094	0.588012	0.784393	0.992188	1.24023	1.44635	2.2186	3.0278	3.7207	5.44574	18.012	49.9172
0	0	0	0	0	0	0	0.0338047	0.176739	0.248047	0.248047	0.248047	0.350791	0.496094	0.590888	0.791323	0.992188	1.24023	1.44635	2.23242	3.06817	3.7207	5.5465	18.4157	50.8696
0	0	0	0	0	0	0	0.0526697	0.179092	0.248047	0.248047	0.248047	0.350791	0.496094	0.592738	0.798302	0.992188	1.24023	1.44635	2.23242	3.06817	3.7207	5.66178	19.354	51.0687
0	0	0	0	0	0	0	0.060027	0.184204	0.248047	0.248047	0.248047	0.350791	0.496094	0.600084	0.799856	1.01359	1.24023	1.44635	2.23586	3.06817	3.72896	5.72661	20.6013	51.5442
0	0	0	0	0	0	0	0.0615326	0.18971	0.248047	0.248047	0.248047	0.350791	0.496094	0.609504	0.803897	1.01954	1.24023	1.44635	2.24616	3.13757	3.72896	5.79071	26.9048	52.1689
0	0	0	0	0	0	0	0.105649	0.191032	0.248047	0.248047	0.248047	0.350791	0.496094	0.612132	0.810868	1.02162	1.24023	1.44635	2.24616	3.17655	3.79439	6.44922	29.3336	53.6068
0	0	0	0	0	0	0	0.111146	0.191507	0.248047	0.248047	0.248047	0.350791	0.496094	0.612386	0.815068	1.02272	1.24023	1.44635	2.24616	3.17655	3.87462	6.49201	29.8503	54.8901
0	0	0	0	0	0	0	0.111522	0.192862	0.248047	0.248047	0.248047	0.350791	0.496094	0.614976	0.833079	1.02272	1.24023	1.44635	2.24616	3.17655	3.97649	6.70186	29.8688	54.9299
0	0	0	0	0	0	0	0.118021	0.194671	0.248047	0.248047	0.248047	0.350791	0.496094	0.616624	0.835614	1.02272	1.24023	1.44635	2.28688	3.17655	3.99964	6.89642	30.3084	55.0753
0	0	0	0	0	0	0	0.118576	0.203107	0.248047	0.248047	0.248047	0.350791	0.496094	0.619321	0.83716	1.02272	1.24023	1.44635	2.28688	3.22461	4.03791	7.56035	31.1839	55.2393
0	0	0	0	0	0	0	0.120357	0.203967	0.248047	0.248047	0.248047	0.350791	0.496094	0.620067	0.84052	1.02272	1.24023	1.46774	2.32979	3.23414	4.03791	8.1592	32.5178	55.3495
0	0	0	0	0	0	0	0.124641	0.206648	0.248047	0.248047	0.248047	0.350791	0.496094	0.622042	0.845856	1.02272	1.24023	1.48828	2.34007	3.33713	4.03791	8.29011	32.5934	55.5725
0	0	0	0	0	0	0	0.127942	0.208125	0.248047	0.248047	0.248047	0.350791	0.496094	0.62321	0.848234	1.02272	1.26168	1.48828	2.34007	3.33713	4.06827	8.29011	33.1873	56.154
0	0	0	0	0	0	0	0.129375	0.208414	0.248047	0.248047	0.248047	0.350791	0.496094	0.625727	0.849899	1.02272	1.2648	1.48828	2.34007	3.33713	4.06827	8.33452	33.6586	57.0643
0	0	0	0	0	0	0	0.131041	0.211238	0.248047	0.248047	0.248047	0.350791	0.496094	0.630194	0.849904	1.02272	1.2648	1.48828	2.34007	3.33713	4.10591	8.4263	33.8518	57.6414
0	0	0	0	0	0	0	0.135133	0.211723	0.248047	0.248047	0.248047	0.350791	0.496094	0.630342	0.852566	1.02272	1.2648	1.48828	2.34007	3.33713	4.2095	8.68518	34.5008	58.2831
0	0	0	0	0	0	0	0.138438	0.21545	0.248047	0.248047	0.248047	0.350791	0.496094	0.636728	0.856641	1.02272	1.2648	1.48828	2.34007	3.3738	4.22409	8.77679	34.7354	58.923
0	0	0	0	0	0	0	0.141176	0.215778	0.248047	0.248047	0.248047	0.350791	0.496094	0.640614	0.861263	1.02272	1.2648	1.48828	2.35318	3.3738	4.24588	8.94346	34.9473	59.1065
0	0	0	0	0	0	0	0.143747	0.218581	0.248047	0.248047	0.248047	0.350791	0.496094	0.641479	0.865561	1.02272	1.2648	1.49028	2.35318	3.45489	4.26756	9.42904	35.3873	59.9479
0	0	0	0	0	0	0	0.145281	0.227384	0.248047	0.248047	0.248047	0.350791	0.496094	0.649371	0.883679	1.02272	1.2648	1.50105	2.35318	3.47266	4.28195	9.72458	35.4976	59.9807
0	0	0	0	0	0	0	0.14709	0.227478	0.248047	0.248047	0.248047	0.350791	0.496094	0.65088	0.888266	1.02272	1.2648	1.50123	2.43981	3.47266	4.3954	10.0727	35.6998	60.4278
0	0	0	0	0	0	0	0.147197	0.228311	0.248047	0.248047	0.248047	0.352802	0.496094	0.652333	0.890133	1.02272	1.2648	1.50793	2.44298	3.4815	4.3954	10.6516	35.8743	60.5666
0	0	0	0	0	0	0	0.147775	0.228968	0.248047	0.248047	0.248047	0.355759	0.496094	0.659111	0.893272	1.02272	1.2648	1.50881	2.44298	3.4815	4.41635	11.1069	36.1587	60.7917
0	0	0	0	0	0	0	0.150512	0.232284	0.248047	0.248047	0.248891	0.356933	0.496094	0.66368	0.894346	1.02272	1.2648	1.50881	2.44298	3.50791	4.70636	12.134	36.3649	61.8135
0	0	0	0	0	0	0	0.152779	0.232302	0.248047	0.248047	0.251766	0.363218	0.496094	0.6654	0.894346	1.02272	1.2648	1.50881	2.44298	3.50791	4.89225	12.1644	36.5531	62.0241
0	0	0	0	0	0	0	0.153689	0.233436	0.248047	0.248047	0.253579	0.368173	0.496094	0.678258	0.894346	1.02272	1.2648	1.52684	2.44298	3.50791	4.91108	12.8793	39.4738	75.6815
0	0	0	0	0	0	0	0.158238	0.239209	0.248047	0.248047	0.260867	0.368602	0.496094	0.681899	0.894346	1.02272	1.2648	1.54798	2.48047	3.50791	4.9423	12.9959	39.8175	76.3445
0	0	0	0	0	0	0	0.161741	0.246075	0.248047	0.248047	0.262415	0.371225	0.496094	0.685619	0.894346	1.02272	1.2648	1.55705	2.48047	3.50791	5.02257	14.599	39.8461	76.5272
0	0	0	0	0	0	0	0.16189	0.246443	0.248047	0.248047	0.269364	0.373987	0.496094	0.685784	0.894346	1.02272	1.2648	1.56306	2.48047	3.50791	5.1076	14.7374	40.2119	76.9525
0	0	0	0	0	0	0	0.163172	0.248047	0.248047	0.248047	0.270917	0.374262	0.496094	0.689757	0.894346	1.0236	1.2648	1.56879	2.48047	3.52541	5.32579	15.729	41.0965
0	0	0	0	0	0	0	0.164074	0.248047	0.248047	0.248047	0.274846	0.385491	0.496094	0.690562	0.894346	1.0282	1.2648	1.56879	2.49284	3.57738	5.44009	16.4723	42.6648
0	0	0	0	0	0	0	0.16472	0.248047	0.248047	0.248047	0.276183	0.386288	0.496094	0.699695	0.894346	1.03254	1.2648	1.56879	2.49284	3.57738	5.44009	16.9436	44.1231
0	0	0	0	0	0	0	0.165883	0.248047	0.248047	0.248047	0.279433	0.386611	0.496094	0.700657	0.894346	1.04031	1.2648	1.56879	2.49284	3.68748	5.5465	17.0305	44.1523
0	0	0	0	0	0	0	0.167909	0.248047	0.248047	0.248047	0.28334	0.391777	0.496094	0.701476	0.897695	1.05206	1.2648	1.56879	2.5282	3.68748	5.57416	17.2299	44.2122
0	0	0	0	0	0	0	0.168686	0.248047	0.248047	0.248047	0.286161	0.393421	0.496094	0.701583	0.898991	1.05237	1.2648	1.56879	2.52959	3.68748	5.79071	17.4217	45.6224
0	0	0	0	0	0	0	0.172718	0.248047	0.248047	0.248047	0.295556	0.39775	0.496094	0.701583	0.920264	1.05237	1.2648	1.56879	2.52959	3.68748	6.16136	17.7852	45.7786
0	0	0	0	0	0	0	0.177222	0.248047	0.248047	0.248047	0.297708	0.399014	0.496094	0.701583	0.922293	1.05237	1.2648	1.56879	2.52959	3.68748	6.16136	18.663	46.9012
0	0	0	0	0	0	0	0.177728	0.248047	0.248047	0.248047	0.299025	0.399367	0.496094	0.701583	0.923637	1.05237	1.2648	1.56879	2.52959	3.68748	6.22098	19.8438	47.0198
0	0	0	0	0	0	0	0.178099	0.248047	0.248047	0.248047	0.299989	0.400757	0.496094	0.701583	0.934228	1.06342	1.2648	1.57052	2.5538	3.7207	6.26042	21.1204	47.6205
0	0	0	0	0	0	0	0.178359	0.248047	0.248047	0.248047	0.304901	0.403802	0.496094	0.701583	0.942154	1.08544	1.2648	1.58428	2.5538	3.72896	6.3531	24.4298	48.0878
0	0	0	0	0	0	0	0.179963	0.248047	0.248047	0.248047	0.306499	0.407331	0.496094	0.701583	0.94381	1.0876	1.2648	1.58827	2.5538	3.75363	6.3531	26.9379	48.4581
0	0	0	0	0	0	0	0.179964	0.248047	0.248047	0.248047	0.306765	0.409429	0.496094	0.703847	0.950673	1.10244	1.2648	1.58827	2.5538	3.8587	6.51094	27.6592	48.5874
0	0	0	0	0	0	0	0.180355	0.248047	0.248047	0.248047	0.311898	0.40962	0.496094	0.712058	0.952924	1.1093	1.2648	1.58827	2.5538	3.87462	7.37496	28.4649	48.6577
0	0	0	0	0	0	0	0.18356	0.248047	0.248047	0.248047	0.315032	0.410479	0.50055	0.717756	0.953326	1.1093	1.2648	1.58827	2.5538	3.87462	7.64129	29.1779	49.0738
0	0	0	0	0	0	0	0.183867	0.248047	0.248047	0.248047	0.316598	0.415216	0.504274	0.721376	0.958506	1.1093	1.2648	1.58827	2.5538	3.97649	7.78488	29.746	49.7116
0	0	0	0	0	0	0	0.184467	0.248047	0.248047	0.248047	0.319463	0.415367	0.506171	0.727645	0.959145	1.1093	1.2648	1.58827	2.58969	3.97649	7.84393	30.1762	50.1552
0	0	0	0	0	0	0	0.187998	0.248047	0.248047	0.248047	0.323205	0.417051	0.523502	0.727967	0.962835	1.1093	1.2648	1.58827	2.58969	4.06827	7.88305	30.9781	50.2563
0	0	0	0	0	0	0	0.191293	0.248047	0.248047	0.248047	0.325626	0.421785	0.524487	0.728084	0.973462	1.1093	1.2648	1.58827	2.58969	4.09089	8.61048	31.1395	51.6253
0	0	0	0	0	0	0	0.191346	0.248047	0.248047	0.248047	0.325901	0.433365	0.526839	0.730157	0.973697	1.1093	1.2648	1.58827	2.60638	4.2168	8.61048	31.7209	52.199
0	0	0	0	0	0	0	0.19294	0.248047	0.248047	0.248047	0.327301	0.433723	0.527752	0.7339	0.98205	1.1093	1.26631	1.58827	2.63677	4.33195	8.68164	32.0864	52.4125
0	0	0	0	0	0	0	0.195742	0.248047	0.248047	0.248047	0.331558	0.434933	0.537028	0.735544	0.983002	1.1093	1.2703	1.58827	2.63677	4.3884	9.57474	32.5858	52.4735
0	0	0	0	0	0	0	0.195831	0.248047	0.248047	0.248047	0.334235	0.437411	0.547292	0.738206	0.985452	1.1093	1.27211	1.58827	2.6413	4.47173	9.64835	33.2975	52.6497
0	0	0	0	0	0	0.0051076	0.197395	0.248047	0.248047	0.248047	0.340181	0.441469	0.548584	0.744117	0.986102	1.1093	1.27304	1.58827	2.67155	4.47173	9.7845	33.4431	52.8875
0	0	0	0	0	0	0.0203829	0.201011	0.248047	0.248047	0.248047	0.340638	0.445917	0.550369	0.744141	0.992188	1.1093	1.27643	1.58827	2.67155	4.56029	10.0727	33.633	52.941
0	0	0	0	0	0	0.0382155	0.20184	0.248047	0.248047	0.248047	0.342772	0.446403	0.551729	0.744141	0.992188	1.1093	1.2777	1.58827	2.67155	4.61394	10.5383	33.7344	52.9828
0	0	0	0	0	0	0.0392733	0.204569	0.248047	0.248047	0.248047	0.34432	0.448916	0.554076	0.744141	0.992188	1.11503	1.27956	1.58827	2.68304	4.70636	10.8802	33.7818	53.0843
0	0	0	0	0	0	0.0495722	0.204783	0.248047	0.248047	0.248047	0.350487	0.45292	0.55465	0.744141	0.992188	1.12239	1.28593	1.58827	2.68304	4.77128	11.239	34.1693	54.1958
0	0	0	0	0	0	0.0528381	0.20516	0.248047	0.248047	0.248047	0.350791	0.455469	0.55465	0.744141	0.992188	1.1242	1.28689	1.58827	2.68304	4.79058	12.9959	34.2861	54.3472
0	0	0	0	0	0	0.0536299	0.208004	0.248047	0.248047	0.248047	0.350791	0.460641	0.55465	0.744141	0.992188	1.12438	1.3042	1.58827	2.68304	4.79058	13.0549	34.6165	55.5592
0	0	0	0	0	0	0.0662676	0.208292	0.248047	0.248047	0.248047	0.350791	0.461099	0.55465	0.744141	0.992188	1.14225	1.31041	1.58827	2.73493	4.92359	13.3485	34.7876	55.651
0	0	0	0	0	0	0.0773338	0.209783	0.248047	0.248047	0.248047	0.350791	0.462236	0.55465	0.744141	0.992188	1.14446	1.32416	1.58827	2.73977	4.99185	13.9657	35.0835	56.6243
0	0	0	0	0	0	0.0778774	0.211125	0.248047	0.248047	0.248047	0.350791	0.466075	0.55465	0.744141	0.992188	1.14962	1.32483	1.58827	2.73977	5.11362	14.8435	35.3203	56.6357
0	0	0	0	0	0	0.0791185	0.212382	0.248047	0.248047	0.248047	0.350791	0.466343	0.55465	0.744141	0.992188	1.15061	1.33252	1.58827	2.77325	5.21489	15.3969	35.54	57.3546
0	0	0	0	0	0	0.080499	0.212788	0.248047	0.248047	0.248047	0.350791	0.466925	0.55465	0.744141	0.992188	1.15151	1.33577	1.60249	2.77325	5.34309	16.5133	36.601	57.4538
0	0	0	0	0	0	0.0856952	0.22054	0.248047	0.248047	0.248047	0.350791	0.469219	0.55465	0.744141	0.992188	1.15641	1.33577	1.61243	2.77325	5.36607	16.6043	37.3597	57.6942
0	0	0	0	0	0	0.0861256	0.227004	0.248047	0.248047	0.248047	0.350791	0.483074	0.55465	0.744141	0.992188	1.1579	1.33577	1.61415	2.77325	5.44009	16.6487	37.892	57.8417
0	0	0	0	0	0	0.0884565	0.228686	0.248047	0.248047	0.248047	0.350791	0.487864	0.55465	0.744141	0.992188	1.15808	1.33577	1.64598	2.77325	5.44009	16.7078	38.262	58.0816
0	0	0	0	0	0	0.0902687	0.228837	0.248047	0.248047	0.248047	0.350791	0.491128	0.55465	0.744141	0.992188	1.15843	1.33577	1.66045	2.77325	5.44009	16.7739	39.1796	58.1325
0	0	0	0	0	0	0.0931485	0.23141	0.248047	0.248047	0.248047	0.350791	0.493019	0.55465	0.744141	0.992188	1.16432	1.33577	1.66094	2.77325	5.46267	16.869	40.5236	58.8755
0	0	0	0	0	0	0.0940668	0.232069	0.248047	0.248047	0.248047	0.350791	0.496094	0.55465	0.744141	0.992188	1.1665	1.33577	1.66395	2.77325	5.62361	17.2727	40.7884	59.1715
0	0	0	0	0	0	0.0952304	0.232478	0.248047	0.248047	0.248047	0.350791	0.496094	0.55465	0.744141	0.992188	1.16684	1.33577	1.66395	2.77325	5.81192	18.0308	40.9886	60.0878
0	0	0	0	0	0	0.0959484	0.23293	0.248047	0.248047	0.248047	0.350791	0.496094	0.55465	0.744141	0.992188	1.16723	1.33577	1.66395	2.77325	5.99432	19.1254	42.3318	60.467
0	0	0	0	0	0	0.09952	0.235323	0.248047	0.248047	0.248047	0.350791	0.496094	0.55465	0.744141	0.992188	1.17049	1.33577	1.66395	2.77325	6.14135	20.3459	42.4885	71.8917
0	0	0	0	0	0	0.10153	0.238635	0.248047	0.248047	0.248047	0.350791	0.496094	0.55465	0.744141	0.992188	1.17347	1.33577	1.66395	2.77325	6.60476	21.6711	44.0526	72.9144
0	0	0	0	0	0	0.106398	0.23975	0.248047	0.248047	0.248047	0.350791	0.496094	0.55465	0.744141	0.992188	1.1738	1.33577	1.66395	2.77325	7.23175	22.2483	44.0554	73.6361
0	0	0	0	0	0	0.109072	0.240401	0.248047	0.248047	0.248047	0.350791	0.496094	0.55465	0.744141	0.992188	1.17798	1.33577	1.66859	2.77325	7.32894	24.3756	44.8554	73.8172
0	0	0	0	0	0	0.112063	0.241022	0.248047	0.248047	0.248047	0.350791	0.496094	0.55465	0.744141	0.992188	1.17918	1.33577	1.67333	2.77325	7.54405	25.0146	45.6029	74.2406
0	0	0	0	0	0	0.112938	0.244849	0.248047	0.248047	0.248047	0.350791	0.496094	0.55465	0.744141	0.992188	1.18102	1.33577	1.68415	2.77325	7.70544	27.1563	45.6528
0	0	0	0	0	0	0.114046	0.246062	0.248047	0.248047	0.250786	0.350791	0.496094	0.55465	0.744141	0.992188	1.18258	1.33577	1.69638	2.77325	7.83216	27.7956	45.6905
0	0	0	0	0	0	0.120116	0.248047	0.248047	0.248047	0.251272	0.350791	0.496094	0.55465	0.744141	0.992188	1.18369	1.33577	1.69973	2.77325	7.91032	28.5027	46.615
0	0	0	0	0	0	0.123936	0.248047	0.248047	0.248047	0.253936	0.350791	0.496094	0.55465	0.744141	0.992188	1.18468	1.33577	1.71578	2.77325	7.99927	28.5092	46.7396
0	0	0	0	0	0	0.124313	0.248047	0.248047	0.248047	0.254977	0.350791	0.496094	0.55465	0.744141	0.992188	1.18546	1.33577	1.73204	2.82817	8.4263	29.0713	47.6883
0	0	0	0	0	0	0.126066	0.248047	0.248047	0.248047	0.256834	0.357178	0.496094	0.55465	0.744141	0.992188	1.19109	1.33577	1.73259	2.82817	8.68164	29.5426	47.9732
0	0	0	0	0	0	0.126099	0.248047	0.248047	0.248047	0.258252	0.358822	0.496094	0.55465	0.744141	0.992188	1.1964	1.33577	1.73583	2.82817	8.88133	30.348	48.0059
0	0	0	0	0	0	0.129038	0.248047	0.248047	0.248047	0.26023	0.358828	0.496094	0.55465	0.744141	0.992188	1.19689	1.33577	1.73633	2.82817	9.70241	30.4815	48.3029
0	0	0	0	0	0	0.129295	0.248047	0.248047	0.248047	0.261612	0.360818	0.496094	0.55481	0.744141	0.992188	1.19711	1.33577	1.73633	2.88972	9.87837	30.5511	48.6577
0	0	0	0	0	0	0.13101	0.248047	0.248047	0.248047	0.262742	0.362074	0.496094	0.554997	0.744141	0.992188	1.19826	1.33577	1.73709	2.89107	10.1184	30.8637	48.7512
0	0	0	0	0	0	0.132542	0.248047	0.248047	0.248047	0.263923	0.362461	0.496094	0.555403	0.744141	0.992188	1.19924	1.33577	1.75248	2.8927	10.8745	31.2667	48.9765
0	0	0	0	0	0	0.135237	0.248047	0.248047	0.248047	0.265361	0.363992	0.496094	0.562152	0.744141	1.00223	1.20314	1.33577	1.75396	2.8927	11.3805	31.5322	49.2609
0	0	0	0	0	0	0.139182	0.248047	0.248047	0.248047	0.26547	0.364855	0.496094	0.5645	0.748154	1.00739	1.20416	1.33577	1.75396	2.90331	11.4693	31.9239	49.6794
0	0	0	0	0	0	0.140651	0.248047	0.248047	0.248047	0.268375	0.364869	0.496094	0.565502	0.749323	1.00968	1.20582	1.33577	1.75396	2.98688	11.6133	32.6406	49.7116
0	0	0	0	0	0	0.141045	0.248047	0.248047	0.248047	0.268586	0.365682	0.496094	0.566264	0.75082	1.01173	1.20706	1.33577	1.75396	2.98688	13.2954	32.7882	49.779
0	0	0	0	0	0	0.141714	0.248047	0.248047	0.248047	0.268845	0.368328	0.496094	0.568659	0.752398	1.01547	1.21112	1.33577	1.75396	2.98688	13.5407	32.8473	49.9881
0	0	0	0	0	0	0.143202	0.248047	0.248047	0.248047	0.271677	0.368407	0.496094	0.570345	0.754982	1.01551	1.2117	1.33577	1.75396	2.98688	14.0776	33.2281	50.0594
0	0	0	0	0	0	0.144726	0.248047	0.248047	0.248047	0.27271	0.369258	0.496094	0.574625	0.760882	1.01791	1.21232	1.33577	1.75396	2.98688	14.4507	33.2281	50.2948
0	0	0	0	0	0	0.147927	0.248047	0.248047	0.248047	0.274973	0.37073	0.496094	0.583832	0.770819	1.02213	1.21384	1.33577	1.75396	2.99716	14.8041	33.4017	50.3932
0	0	0	0	0	0	0.148671	0.248047	0.248047	0.248047	0.279376	0.371375	0.496094	0.589814	0.77127	1.02272	1.21396	1.33577	1.75396	2.99716	15.2302	33.421	50.4951
0	0	0	0	0	0	0.149525	0.248047	0.248047	0.248047	0.280229	0.371538	0.496094	0.604768	0.780279	1.02272	1.21444	1.33577	1.75396	2.99716	15.6289	33.59	50.7339
0	0	0	0	0	0	0.149826	0.248047	0.248047	0.248047	0.284447	0.372256	0.496094	0.605636	0.780865	1.02272	1.21653	1.33577	1.75396	2.99716	15.7544	33.738	50.9071
0	0	0	0	0	0	0.151594	0.248047	0.248047	0.248047	0.284455	0.375696	0.496094	0.606299	0.781791	1.02272	1.21814	1.33958	1.75396	2.99716	15.8226	34.1693	51.739
0	0	0	0	0	0	0.151797	0.248047	0.248047	0.248047	0.285222	0.375921	0.496094	0.615437	0.784393	1.02272	1.22692	1.35271	1.75396	3.01762	16.2144	34.2287	52.1046
0	0	0	0	0	0	0.152822	0.248047	0.248047	0.248047	0.286961	0.377301	0.496094	0.617083	0.784393	1.02272	1.22749	1.35282	1.75396	3.0278	16.5468	34.3077	52.1654
0	0	0	0	0	0	0.153045	0.248047	0.248047	0.248047	0.288165	0.381302	0.496094	0.632216	0.784393	1.02272	1.23236	1.3609	1.75396	3.0278	16.9436	35.0861	52.9497
0	0	0	0	0	0	0.153852	0.248047	0.248047	0.248047	0.291762	0.388114	0.496094	0.636469	0.784393	1.02272	1.23371	1.365	1.75396	3.0278	17.515	35.7807	53.6114
0	0	0	0	0	0	0.155247	0.248047	0.248047	0.248047	0.291966	0.393314	0.496094	0.641856	0.784393	1.02272	1.23806	1.36577	1.75396	3.0278	17.5431	36.3107	54.0002
0	0	0	0	0	0	0.156556	0.248047	0.248047	0.248047	0.293679	0.394877	0.496094	0.647053	0.784393	1.02272	1.24023	1.37309	1.75396	3.0278	18.4624	37.2252	54.5624
0	0	0	0	0	0	0.156759	0.248047	0.248047	0.248047	0.294274	0.396273	0.496094	0.649733	0.784393	1.02272	1.24023	1.38084	1.75396	3.0278	19.602	37.231	54.6452
0	0	0	0	0	0	0.157392	0.248047	0.248047	0.248047	0.295191	0.400224	0.496094	0.651075	0.784393	1.02272	1.24023	1.38552	1.75396	3.04544	20.4545	37.6835	54.8728
0	0	0	0	0	0	0.160108	0.248047	0.248047	0.248047	0.296891	0.404145	0.496094	0.66206	0.784393	1.02272	1.24023	1.40072	1.75396	3.04713	20.8728	38.8769	55.1758
0	0	0	0	0	0	0.161854	0.248047	0.248047	0.248047	0.298581	0.404324	0.496094	0.667166	0.784393	1.02272	1.24023	1.40317	1.75396	3.10802	21.7519	39.3551	55.2209
0	0	0	0	0	0	0.167112	0.248047	0.248047	0.248047	0.298789	0.40613	0.496094	0.676031	0.784393	1.02272	1.24023	1.40317	1.75396	3.13757	21.783	40.4643	55.4211
0	0	0	0	0	0	0.168005	0.248047	0.248047	0.248047	0.305251	0.406801	0.496094	0.676406	0.784393	1.02272	1.24023	1.40317	1.75396	3.15712	22.0887	40.9217	55.4211
0	0	0	0	0	0	0.17208	0.248047	0.248047	0.248047	0.305298	0.407699	0.496094	0.678055	0.784393	1.02272	1.24023	1.40317	1.77357	3.17655	24.4914	41.1556	55.5913
0	0	0	0	0	0	0.173062	0.248047	0.248047	0.248047	0.305453	0.408861	0.496094	0.681076	0.784393	1.02272	1.24023	1.40317	1.7791	3.17655	25.8731	42.1884	56.1617
0	0	0	0	0	0	0.173603	0.248047	0.248047	0.248047	0.31063	0.409904	0.496094	0.683328	0.784393	1.02272	1.24023	1.40317	1.7823	3.17655	27.2321	42.6013	56.4076
0	0	0	0	0	0	0.1739	0.248047	0.248047	0.248047	0.312625	0.410226	0.496094	0.687403	0.784393	1.02272	1.24023	1.40317	1.78869	3.17655	27.4033	42.7275	57.1354
0	0	0	0	0	0	0.180637	0.248047	0.248047	0.248047	0.313798	0.410305	0.496094	0.696154	0.784393	1.02272	1.24023	1.40536	1.78869	3.17655	27.4974	43.884	57.6206
0	0	0	0	0	0	0.182597	0.248047	0.248047	0.248047	0.316042	0.413766	0.496094	0.697928	0.795544	1.02272	1.24023	1.40778	1.78869	3.17655	28.2403	44.0666	58.6997
0	0	0	0	0	0	0.182724	0.248047	0.248047	0.248047	0.317133	0.418266	0.496094	0.698823	0.801572	1.02272	1.24023	1.42098	1.78869	3.17655	28.4	45.0777	58.959
0	0	0	0	0	0	0.18409	0.248047	0.248047	0.248047	0.324995	0.421252	0.496094	0.701583	0.801902	1.02272	1.24023	1.44241	1.78869	3.17993	28.633	45.2534	67.6809
0	0	0	0	0	0	0.184332	0.248047	0.248047	0.248047	0.32595	0.424442	0.496094	0.701583	0.802094	1.02272	1.24023	1.44635	1.78869	3.22461	28.8631	45.3248	69.125
0	0	0	0	0	0	0.184958	0.248047	0.248047	0.248047	0.327228	0.424537	0.496094	0.701583	0.805217	1.02272	1.24023	1.44635	1.78869	3.23414	29.1178	45.6979	70.2095
0	0	0	0	0	0	0.186388	0.248047	0.248047	0.248047	0.328254	0.426815	0.496094	0.701583	0.81011	1.02272	1.24023	1.44635	1.78869	3.23414	29.9151	45.8773	70.9301
0	0	0	0	0	0	0.186882	0.248047	0.248047	0.248047	0.332869	0.42775	0.496094	0.701583	0.811884	1.02272	1.24023	1.44635	1.78869	3.23414	29.9973	46.068	71.1095
0	0	0	0	0	0	0.187967	0.248047	0.248047	0.248047	0.333418	0.427842	0.496094	0.701583	0.812727	1.02272	1.24023	1.44635	1.79047	3.23414	30.2007	46.2513	71.5906
0	0	0	0	0	0	0.188418	0.248047	0.248047	0.248047	0.335604	0.42898	0.496094	0.701583	0.821799	1.02427	1.24023	1.44635	1.7943	3.23414	30.4047	46.8815
0	0	0	0	0	0	0.190428	0.248047	0.248047	0.248047	0.335651	0.433217	0.496094	0.701583	0.830093	1.02779	1.24023	1.44635	1.80581	3.26255	30.7138	47.258
0	0	0	0	0	0	0.193895	0.248047	0.248047	0.248047	0.336673	0.433731	0.496094	0.701583	0.839054	1.03298	1.24023	1.44635	1.80581	3.30009	30.8776	47.258
0	0	0	0	0	0	0.195939	0.248047	0.248047	0.248047	0.337408	0.436468	0.496094	0.701583	0.839134	1.03453	1.24023	1.44635	1.80581	3.30415	31.1049	47.3536
0	0	0	0	0	0.0185692	0.196159	0.248047	0.248047	0.248047	0.337438	0.437966	0.496094	0.701583	0.841818	1.03537	1.24023	1.44635	1.80581	3.30936	31.5176	47.3614
0	0	0	0	0	0.023078	0.198109	0.248047	0.248047	0.248047	0.33863	0.439295	0.496094	0.701583	0.848976	1.03685	1.24023	1.44635	1.80822	3.30936	31.7887	47.4081
0	0	0	0	0	0.0253111	0.199483	0.248047	0.248047	0.248047	0.341806	0.439737	0.496094	0.701583	0.850381	1.03784	1.24023	1.44635	1.81074	3.3279	31.9596	47.4282
0	0	0	0	0	0.0299452	0.2017	0.248047	0.248047	0.248047	0.341955	0.441374	0.496094	0.713923	0.85461	1.03805	1.24023	1.44635	1.82321	3.33713	32.0864	47.4937
0	0	0	0	0	0.0321852	0.203955	0.248047	0.248047	0.248047	0.343275	0.441405	0.496094	0.716113	0.858492	1.04375	1.24023	1.44635	1.82635	3.33713	32.2127	47.7347
0	0	0	0	0	0.0396662	0.205274	0.248047	0.248047	0.248047	0.346042	0.441937	0.496094	0.716369	0.86898	1.05061	1.24023	1.44635	1.85526	3.33713	32.2127	47.9058
0	0	0	0	0	0.0514878	0.205824	0.248047	0.248047	0.248047	0.346405	0.44292	0.496094	0.723344	0.873352	1.05237	1.24023	1.44635	1.85997	3.33713	32.4193	47.9732
0	0	0	0	0	0.0542361	0.211098	0.248047	0.248047	0.248047	0.348441	0.443248	0.496094	0.724765	0.875713	1.05237	1.24023	1.44635	1.86217	3.33713	32.6406	48.1447
0	0	0	0	0	0.0580181	0.211701	0.248047	0.248047	0.248047	0.349703	0.445931	0.496094	0.730971	0.876235	1.05237	1.24023	1.44635	1.87856	3.3738	32.9445	48.4047
0	0	0	0	0	0.0617744	0.211978	0.248047	0.248047	0.248047	0.350791	0.44637	0.496094	0.732595	0.876306	1.05237	1.24023	1.44635	1.88907	3.3738	32.9492	48.6577
0	0	0	0	0	0.0655624	0.212953	0.248047	0.248047	0.248047	0.350791	0.448512	0.496094	0.734568	0.880497	1.05237	1.24023	1.44635	1.88907	3.38801	33.2577	48.8954
0	0	0	0	0	0.0754785	0.214128	0.248047	0.248047	0.248047	0.350791	0.449451	0.496094	0.735592	0.882193	1.05237	1.24023	1.44635	1.88907	3.44598	33.3906	48.9954
0	0	0	0	0	0.0755076	0.214145	0.248047	0.248047	0.248047	0.350791	0.453321	0.496094	0.739275	0.882243	1.05363	1.24023	1.44635	1.88907	3.45133	33.512	49.4982
0	0	0	0	0	0.078232	0.214902	0.248047	0.248047	0.250205	0.350791	0.456278	0.496094	0.744141	0.884719	1.05437	1.24023	1.44635	1.88907	3.45481	34.1405	49.6026
0	0	0	0	0	0.0789624	0.217075	0.248047	0.248047	0.252989	0.350791	0.45655	0.496094	0.744141	0.886317	1.05696	1.24023	1.44635	1.88907	3.47266	34.2026	49.6571
0	0	0	0	0	0.0790497	0.219472	0.248047	0.248047	0.253884	0.350791	0.457028	0.496094	0.744141	0.894037	1.05852	1.24023	1.44635	1.88907	3.50791	34.3793	50.1239
0	0	0	0	0	0.079244	0.219915	0.248047	0.248047	0.255079	0.350791	0.457668	0.496094	0.744141	0.894346	1.06075	1.24023	1.44635	1.88907	3.50791	35.2654	50.3633
0	0	0	0	0	0.0792518	0.220469	0.248047	0.248047	0.255557	0.350791	0.458573	0.496094	0.744141	0.894346	1.06396	1.24023	1.44635	1.88907	3.50791	36.0488	51.3175
0	0	0	0	0	0.0802159	0.220973	0.248047	0.248047	0.259381	0.350791	0.459245	0.496094	0.744141	0.894346	1.06559	1.24023	1.44635	1.92612	3.50791	36.9148	51.3912
0	0	0	0	0	0.0809751	0.221562	0.248047	0.248047	0.260812	0.350791	0.459609	0.496094	0.744141	0.894346	1.07466	1.24023	1.44635	1.92612	3.50791	37.7814	51.5985
0	0	0	0	0	0.0864558	0.22401	0.248047	0.248047	0.261477	0.350791	0.460054	0.497559	0.744141	0.894346	1.07798	1.24023	1.44635	1.93703	3.50791	37.7887	51.739
0	0	0	0	0	0.0880523	0.224398	0.248047	0.248047	0.261939	0.350791	0.460506	0.499125	0.744141	0.894346	1.07958	1.24023	1.44635	1.93731	3.50791	38.2065	52.2502
0	0	0	0	0	0.0915189	0.225321	0.248047	0.248047	0.263618	0.350791	0.46132	0.4999	0.744141	0.894346	1.07966	1.24023	1.44635	1.93731	3.50791	38.5559	52.409
0	0	0	0	0	0.0955394	0.225585	0.248047	0.248047	0.264146	0.350791	0.467239	0.501152	0.744141	0.894346	1.08298	1.24023	1.44635	1.93731	3.55149	39.5944	52.6292
0	0	0	0	0	0.09794	0.228679	0.248047	0.248047	0.266132	0.350791	0.469226	0.505036	0.744141	0.894346	1.08429	1.24023	1.44635	1.93731	3.57403	40.3341	52.7291
0	0	0	0	0	0.0983675	0.228718	0.248047	0.248047	0.266426	0.350791	0.470106	0.514318	0.744141	0.894346	1.08493	1.24023	1.44635	1.93731	3.68748	41.2213	52.7367
0	0	0	0	0	0.0989164	0.229341	0.248047	0.248047	0.266719	0.350791	0.470351	0.518899	0.744141	0.896079	1.08548	1.24023	1.44635	1.93731	3.68748	41.9434	52.8084
0	0	0	0	0	0.0995136	0.229681	0.248047	0.248047	0.268207	0.350791	0.470703	0.520564	0.744141	0.902677	1.08872	1.24023	1.44635	1.93731	3.7207	42.0255	53.1104
0	0	0	0	0	0.0998638	0.232625	0.248047	0.248047	0.26848	0.350791	0.472616	0.523299	0.744141	0.905731	1.09116	1.24023	1.44635	1.93731	3.7207	42.1183	53.3168
0	0	0	0	0	0.101079	0.235209	0.248047	0.248047	0.268545	0.350791	0.473462	0.523345	0.744141	0.906226	1.09381	1.24023	1.44756	1.93731	3.7207	42.6208	53.5029
0	0	0	0	0	0.101871	0.235551	0.248047	0.248047	0.26954	0.350791	0.473681	0.526344	0.744141	0.906244	1.09645	1.24023	1.45021	1.93731	3.7207	43.0331	53.6682
0	0	0	0	0	0.102192	0.235645	0.248047	0.248047	0.270188	0.350791	0.475624	0.526546	0.744141	0.907884	1.09729	1.24032	1.45098	1.93731	3.7207	43.5207	54.4083
0	0	0	0	0	0.103735	0.238907	0.248047	0.248047	0.270496	0.350791	0.476397	0.527102	0.744141	0.932462	1.09751	1.24268	1.45784	1.95145	3.72896	43.8594	54.8638
0	0	0	0	0	0.105063	0.238954	0.248047	0.248047	0.271446	0.350791	0.477684	0.532367	0.744141	0.934651	1.10194	1.24399	1.46948	1.95482	3.72896	44.1252	55.7267
0	0	0	0	0	0.106071	0.239563	0.248047	0.248047	0.272939	0.351151	0.479856	0.533653	0.744141	0.934685	1.1048	1.25088	1.47654	1.97126	3.72896	44.3838	56.1118
0	0	0	0	0	0.11129	0.242476	0.248047	0.248047	0.27661	0.351563	0.481218	0.54238	0.744141	0.936938	1.10661	1.25595	1.47986	1.98251	3.74482	44.4586	57.2403
0	0	0	0	0	0.112667	0.243188	0.248047	0.248047	0.282928	0.354364	0.481752	0.547628	0.744141	0.942472	1.1093	1.2648	1.48712	1.98438	3.75363	44.5332	57.6942
0	0	0	0	0	0.116051	0.244477	0.248047	0.248047	0.283644	0.35459	0.485146	0.552994	0.744141	0.943483	1.1093	1.2648	1.48828	1.98438	3.79439	44.6822	63.4171
0	0	0	0	0	0.11626	0.244794	0.248047	0.248047	0.286204	0.35498	0.485252	0.55465	0.744141	0.944082	1.1093	1.2648	1.48828	1.99032	3.8587	44.707	64.913
0	0	0	0	0	0.116978	0.246013	0.248047	0.248047	0.287996	0.357558	0.486656	0.55465	0.744141	0.944758	1.1093	1.2648	1.48828	1.99152	3.87462	44.8032	66.4215
0	0	0	0	0	0.117728	0.247213	0.248047	0.248047	0.288325	0.358705	0.486921	0.55465	0.744141	0.947375	1.1093	1.2648	1.48828	1.99528	3.92197	44.8389	67.5075
0	0	0	0	0	0.120188	0.248047	0.248047	0.248047	0.289531	0.359349	0.489109	0.55465	0.744141	0.948377	1.1093	1.2648	1.48828	1.99982	3.92197	44.8389	68.2269
0	0	0	0	0	0.12057	0.248047	0.248047	0.248047	0.289996	0.361715	0.490174	0.55465	0.744141	0.949532	1.1093	1.2648	1.48828	1.99982	3.92197	44.8807	68.4668
0	0	0	0	0	0.120888	0.248047	0.248047	0.248047	0.290761	0.361781	0.490824	0.55465	0.744141	0.953445	1.1093	1.2648	1.48828	1.99982	3.92197	45.0115	69.2495
0	0	0	0	0	0.123245	0.248047	0.248047	0.248047	0.291364	0.362709	0.491877	0.55465	0.744141	0.959641	1.1093	1.2648	1.49248	1.99982	3.92197	45.2507
0	0	0	0	0	0.124265	0.248047	0.248047	0.248047	0.291386	0.362769	0.496094	0.55465	0.744141	0.960626	1.1093	1.2648	1.49367	1.99982	3.99964	45.3838
0	0	0	0	0	0.125904	0.248047	0.248047	0.248047	0.291795	0.362917	0.496094	0.55465	0.744141	0.968449	1.1093	1.2648	1.5074	1.99982	4.00732	45.5556
0	0	0	0	0	0.126543	0.248047	0.248047	0.248047	0.292297	0.364044	0.496094	0.55465	0.744141	0.969272	1.1093	1.2648	1.50881	1.99982	4.03791	45.6116
0	0	0	0	0	0.127006	0.248047	0.248047	0.248047	0.292548	0.365063	0.496094	0.55465	0.744141	0.972073	1.1093	1.2648	1.50881	1.99982	4.03838	46.1247
0	0	0	0	0	0.128162	0.248047	0.248047	0.248047	0.293738	0.369998	0.496094	0.55465	0.744141	0.973337	1.1093	1.2648	1.50881	1.99982	4.06827	46.339
0	0	0	0	0	0.129324	0.248047	0.248047	0.248047	0.295816	0.372965	0.496094	0.55465	0.744141	0.976099	1.11135	1.2648	1.50881	1.99982	4.15802	46.4987
0	0	0	0	0	0.129882	0.248047	0.248047	0.248047	0.297107	0.373015	0.496094	0.55465	0.744141	0.976287	1.11249	1.2648	1.50881	1.99982	4.15802	46.6566
0	0	0	0	0	0.131149	0.248047	0.248047	0.248047	0.300497	0.373618	0.496094	0.55465	0.744141	0.976366	1.11251	1.2648	1.50881	1.99982	4.33905	46.7126
0	0	0	0	0	0.131304	0.248047	0.248047	0.248047	0.304209	0.374502	0.496094	0.55465	0.744141	0.977353	1.11395	1.2648	1.50881	1.99982	4.33905	46.7521
0	0	0	0	0	0.133689	0.248047	0.248047	0.248047	0.31021	0.381436	0.496094	0.55465	0.744141	0.978699	1.11412	1.2648	1.51083	2.04545	4.41635	47.5435
0	0	0	0	0	0.134091	0.248047	0.248047	0.248047	0.310901	0.381842	0.496094	0.55465	0.744141	0.980926	1.11681	1.2648	1.51112	2.04545	4.47173	47.6921
0	0	0	0	0	0.13453	0.248047	0.248047	0.248047	0.313916	0.381966	0.496094	0.55465	0.744141	0.981849	1.11792	1.2648	1.51665	2.04545	4.47173	48.2118
0	0	0	0	0	0.13605	0.248047	0.248047	0.248047	0.317691	0.383281	0.496094	0.55465	0.744141	0.983847	1.12584	1.2648	1.51702	2.05202	4.47173	48.2418
0	0	0	0	0	0.138358	0.248047	0.248047	0.248047	0.31782	0.38506	0.496094	0.55465	0.744141	0.985063	1.1269	1.2648	1.51821	2.05336	4.47173	48.7568
0	0	0	0	0	0.139796	0.248047	0.248047	0.248047	0.318347	0.386286	0.496094	0.55465	0.744141	0.991269	1.12719	1.2648	1.52503	2.06379	4.55354	48.9281
0	0	0	0	0	0.14	0.248047	0.248047	0.248047	0.320761	0.389186	0.496094	0.55465	0.744141	0.992188	1.13159	1.2648	1.52684	2.08393	4.56029	49.0562
0	0	0	0	0	0.140217	0.248047	0.248047	0.248047	0.322982	0.390464	0.496094	0.55465	0.744141	0.992188	1.13231	1.2648	1.52746	2.10425	4.56029	49.1971
0	0	0	0	0	0.14117	0.248047	0.248047	0.248047	0.324518	0.390773	0.496094	0.55465	0.744141	0.992188	1.13541	1.2648	1.5345	2.10475	4.61394	49.2759
0	0	0	0	0	0.143512	0.248047	0.248047	0.248047	0.325133	0.390928	0.496094	0.55465	0.744141	0.992188	1.13619	1.2648	1.53725	2.10475	4.66038	49.5722
0	0	0	0	0	0.143702	0.248047	0.248047	0.248047	0.327246	0.392845	0.496094	0.55465	0.744141	0.992188	1.13652	1.2648	1.54203	2.11931	4.88596	49.7493
0	0	0	0	0	0.144643	0.248047	0.248047	0.248047	0.327854	0.393643	0.496094	0.55465	0.744141	0.992188	1.13798	1.2648	1.54376	2.11931	4.88596	49.7561
0	0	0	0	0	0.145762	0.248047	0.248047	0.248047	0.327866	0.394833	0.496094	0.55465	0.744141	0.992188	1.13994	1.2648	1.5483	2.11931	4.91108	50.1055
0	0	0	0	0	0.145782	0.248047	0.248047	0.248047	0.327939	0.394931	0.496094	0.55465	0.744141	0.992188	1.14105	1.2648	1.54968	2.11931	4.92359	50.1282
0	0	0	0	0	0.145822	0.248047	0.248047	0.248047	0.328501	0.394952	0.496094	0.55465	0.744141	0.992188	1.14409	1.2648	1.55182	2.11931	4.96094	50.1828
0	0	0	0	0.0205295	0.147827	0.248047	0.248047	0.248047	0.332202	0.395333	0.496094	0.554667	0.744141	0.992188	1.14579	1.2648	1.56117	2.11931	4.96094	50.3211
0	0	0	0	0.0260818	0.148935	0.248047	0.248047	0.248047	0.333446	0.396042	0.496094	0.555038	0.745133	0.992188	1.14955	1.2648	1.56879	2.13378	5.02257	50.4365
0	0	0	0	0.0263893	0.149345	0.248047	0.248047	0.248047	0.335981	0.397096	0.496094	0.558262	0.746967	0.992188	1.15576	1.2648	1.56879	2.13378	5.0895	50.6405
0	0	0	0	0.0296434	0.149577	0.248047	0.248047	0.248047	0.341192	0.399557	0.496094	0.561541	0.748986	0.992188	1.16282	1.2648	1.56879	2.13378	5.0895	51.1897
0	0	0	0	0.029652	0.152082	0.248047	0.248047	0.248047	0.34306	0.405038	0.496094	0.569811	0.759453	0.992188	1.16604	1.2648	1.56879	2.13378	5.11362	51.2546
0	0	0	0	0.0301686	0.153563	0.248047	0.248047	0.248047	0.343484	0.405235	0.496094	0.570031	0.762567	0.992188	1.16651	1.2648	1.56879	2.13378	5.11362	51.3912
0	0	0	0	0.0340523	0.153749	0.248047	0.248047	0.248047	0.344581	0.407487	0.496094	0.579773	0.763967	0.992188	1.16867	1.2648	1.56879	2.13378	5.11362	51.4373
0	0	0	0	0.036758	0.154496	0.248047	0.248047	0.248047	0.350791	0.407977	0.496094	0.584467	0.780328	0.992188	1.17512	1.2648	1.56879	2.13378	5.11362	51.9029
0	0	0	0	0.0419078	0.155794	0.248047	0.248047	0.248047	0.350791	0.4088	0.496094	0.587823	0.784393	0.992188	1.17544	1.2648	1.56879	2.13378	5.26187	51.9651
0	0	0	0	0.0461649	0.160247	0.248047	0.248047	0.248047	0.350791	0.410155	0.496094	0.589098	0.784393	0.992188	1.17699	1.26495	1.56879	2.13378	5.26187	52.9805
0	0	0	0	0.0500054	0.160821	0.248047	0.248047	0.248047	0.350791	0.411964	0.496094	0.591089	0.784393	0.992188	1.17972	1.26529	1.56879	2.13378	5.36607	53.3555
0	0	0	0	0.0508445	0.162089	0.248047	0.248047	0.248047	0.350791	0.412933	0.496094	0.59319	0.784393	0.992188	1.18141	1.26643	1.56879	2.15889	5.44009	54.252
0	0	0	0	0.0520086	0.162312	0.248047	0.248047	0.248047	0.350791	0.419461	0.496094	0.594658	0.784393	0.992188	1.18156	1.2787	1.56879	2.16322	5.5465	54.8475
0	0	0	0	0.0589524	0.163577	0.248047	0.248047	0.248047	0.350791	0.419587	0.496094	0.610065	0.784393	0.992188	1.18218	1.28253	1.56879	2.18171	5.65634	55.4677
0	0	0	0	0.0599162	0.167352	0.248047	0.248047	0.248047	0.350791	0.422337	0.496094	0.620201	0.784393	0.992188	1.18369	1.28492	1.56879	2.18567	5.85412	56.8677
0	0	0	0	0.0609425	0.167369	0.248047	0.248047	0.248047	0.350791	0.422993	0.496094	0.631499	0.784393	0.992188	1.18586	1.29753	1.56879	2.20187	5.88033	58.5737
0	0	0	0	0.0647831	0.170361	0.248047	0.248047	0.248047	0.350791	0.42767	0.496094	0.631547	0.784393	0.992188	1.18861	1.30113	1.56879	2.21507	6.20117	60.6473
0	0	0	0	0.0662904	0.170396	0.248047	0.248047	0.248047	0.350791	0.427826	0.496094	0.633456	0.784393	0.992188	1.18937	1.30228	1.56879	2.2186	6.21604	62.2064
0	0	0	0	0.0677746	0.170433	0.248047	0.248047	0.248047	0.350791	0.429067	0.496094	0.633775	0.784393	0.992188	1.19276	1.3048	1.56879	2.2186	6.32398	63.721
0	0	0	0	0.0702759	0.170871	0.248047	0.248047	0.248047	0.350791	0.431472	0.496094	0.634493	0.784393	0.992188	1.19337	1.31252	1.57117	2.2186	7.10731	64.8086
0	0	0	0	0.0716573	0.171818	0.248047	0.248047	0.248047	0.350791	0.432951	0.496094	0.637268	0.784393	0.992188	1.19518	1.31298	1.57389	2.2186	7.23175	65.5919
0	0	0	0	0.075908	0.172758	0.248047	0.248047	0.248047	0.350791	0.433367	0.496094	0.639461	0.784393	0.992188	1.19566	1.31636	1.58428	2.2186	7.23175	66.136
0	0	0	0	0.0775068	0.175355	0.248047	0.248047	0.248047	0.350791	0.434141	0.496094	0.643877	0.784393	0.992188	1.19884	1.31828	1.587	2.21917	7.29528	66.9194
0	0	0	0	0.077509	0.175929	0.248047	0.248047	0.248047	0.350791	0.434424	0.496094	0.652832	0.784393	0.992188	1.19893	1.32	1.58827	2.22174	7.49906
0	0	0	0	0.0791841	0.176225	0.248047	0.248047	0.250889	0.350791	0.435089	0.496094	0.653315	0.784393	0.992188	1.20062	1.33106	1.58827	2.23242	7.54405
0	0	0	0	0.0815422	0.17653	0.248047	0.248047	0.253396	0.350791	0.4356	0.496094	0.659099	0.784393	0.992188	1.20255	1.33272	1.58827	2.23242	7.83216
0	0	0	0	0.0845582	0.176865	0.248047	0.248047	0.257057	0.350791	0.438419	0.496094	0.659636	0.784393	0.992188	1.21236	1.33577	1.58827	2.23242	8.07582
0	0	0	0	0.0860723	0.179917	0.248047	0.248047	0.262596	0.350791	0.440849	0.496094	0.663977	0.784393	0.992188	1.21258	1.33577	1.58827	2.24066	8.31975
0	0	0	0	0.0877688	0.180634	0.248047	0.248047	0.26318	0.350791	0.443421	0.496094	0.664832	0.784393	0.992188	1.23291	1.33577	1.58827	2.24616	8.4263
0	0	0	0	0.0878805	0.182784	0.248047	0.248047	0.26698	0.350791	0.443487	0.496094	0.665118	0.784393	0.992188	1.23421	1.33577	1.58827	2.24616	8.68518
0	0	0	0	0.0880494	0.187795	0.248047	0.248047	0.267104	0.350791	0.444887	0.496094	0.665292	0.784393	0.992188	1.23494	1.33577	1.58827	2.24616	8.76978
0	0	0	0	0.0901869	0.187986	0.248047	0.248047	0.269333	0.350791	0.447105	0.496094	0.668515	0.784393	0.992188	1.23738	1.33577	1.58827	2.24616	8.89171
0	0	0	0	0.090511	0.188481	0.248047	0.248047	0.269541	0.350791	0.447713	0.496094	0.669212	0.784393	0.992188	1.23796	1.33577	1.58827	2.24616	8.94346
0	0	0	0	0.0924015	0.188728	0.248047	0.248047	0.269812	0.350791	0.449877	0.496094	0.680919	0.784393	0.992188	1.24023	1.33577	1.58827	2.25118	8.94346
0	0	0	0	0.0926821	0.189106	0.248047	0.248047	0.271655	0.350791	0.450498	0.496094	0.681814	0.784393	0.992188	1.24023	1.33577	1.58827	2.27421	9.87526
0	0	0	0	0.0933139	0.18977	0.248047	0.248047	0.272947	0.350791	0.45197	0.496094	0.682368	0.784393	0.992188	1.24023	1.33577	1.58827	2.28688	9.98369
0	0	0	0	0.0948378	0.189977	0.248047	0.248047	0.274686	0.350791	0.452551	0.496094	0.684218	0.784393	0.992188	1.24023	1.33577	1.58827	2.28688	10.2272
0	0	0	0	0.0953153	0.191845	0.248047	0.248047	0.275098	0.355021	0.453309	0.496094	0.685562	0.787722	0.992188	1.24023	1.33577	1.58827	2.28688	10.3171
0	0	0	0	0.0954691	0.194811	0.248047	0.248047	0.27537	0.35586	0.45415	0.496094	0.687396	0.795242	0.992188	1.24023	1.33577	1.58827	2.28688	11.5522
0	0	0	0	0.0997004	0.19535	0.248047	0.248047	0.276357	0.356867	0.45626	0.496094	0.688569	0.796011	0.992188	1.24023	1.33577	1.58827	2.28688	11.6133
0	0	0	0	0.0997346	0.195999	0.248047	0.248047	0.278524	0.358062	0.457111	0.496094	0.689074	0.797075	0.992188	1.24023	1.33577	1.58827	2.28688	11.9475
0	0	0	0	0.0999837	0.197783	0.248047	0.248047	0.282563	0.358969	0.457697	0.496094	0.693653	0.799547	1.00112	1.24023	1.33577	1.58827	2.3017	12.0322
0	0	0	0	0.100177	0.198247	0.248047	0.248047	0.28371	0.361033	0.461454	0.496094	0.694047	0.802773	1.00393	1.24023	1.33577	1.58827	2.32707	12.4642
0	0	0	0	0.100854	0.199785	0.248047	0.248047	0.285013	0.361631	0.46371	0.496094	0.70068	0.803028	1.0065	1.24023	1.33577	1.58827	2.34007	12.9484
0	0	0	0	0.100896	0.200149	0.248047	0.248047	0.285054	0.361843	0.467006	0.496094	0.701135	0.803642	1.00722	1.24023	1.33577	1.58827	2.34007	12.9484
0	0	0	0	0.101379	0.202574	0.248047	0.248047	0.288608	0.362579	0.467168	0.496094	0.701583	0.805018	1.00845	1.24023	1.33577	1.58827	2.34007	13.2374
0	0	0	0	0.101691	0.203255	0.248047	0.248047	0.29202	0.36265	0.467436	0.496094	0.701583	0.810146	1.0088	1.24023	1.33577	1.58827	2.34007	13.2954
0	0	0	0	0.104391	0.204269	0.248047	0.248047	0.293098	0.36513	0.467809	0.496094	0.701583	0.811571	1.01058	1.24023	1.33577	1.58827	2.34007	13.6786
0	0	0	0	0.104529	0.205933	0.248047	0.248047	0.293215	0.370329	0.46897	0.496094	0.701583	0.813863	1.0179	1.24023	1.33577	1.58827	2.34007	13.7213
0	0	0	0	0.10503	0.205943	0.248047	0.248047	0.294223	0.371568	0.469014	0.496094	0.701583	0.814245	1.02272	1.24023	1.33577	1.58827	2.34007	14.1582
0	0	0	0	0.105418	0.206277	0.248047	0.248047	0.294359	0.371777	0.470097	0.496094	0.701583	0.818146	1.02272	1.24023	1.33577	1.58827	2.34007	14.489
0	0	0	0	0.108052	0.210804	0.248047	0.248047	0.295781	0.372099	0.470218	0.496094	0.701583	0.818759	1.02272	1.24023	1.33577	1.60489	2.35318	14.7374
0	0	0	0	0.109695	0.210845	0.248047	0.248047	0.296197	0.373132	0.472544	0.496094	0.701583	0.820301	1.02272	1.24023	1.33577	1.60989	2.35318	15.082
0	0	0	0	0.110121	0.21155	0.248047	0.248047	0.296428	0.373227	0.473039	0.496094	0.701583	0.825553	1.02272	1.24023	1.33577	1.61047	2.37291	15.3429
0	0	0	0	0.110312	0.211596	0.248047	0.248047	0.300115	0.374922	0.473243	0.496094	0.701583	0.826998	1.02272	1.24023	1.33577	1.61242	2.43144	15.5401
0	0	0	0	0.111385	0.21424	0.248047	0.248047	0.300383	0.375134	0.473524	0.496094	0.701583	0.828887	1.02272	1.24023	1.33577	1.61729	2.43179	15.8827
0	0	0	0	0.113748	0.214978	0.248047	0.248047	0.303705	0.37711	0.47484	0.496094	0.701583	0.834979	1.02272	1.24023	1.33577	1.62151	2.43463	15.9234
0	0	0	0	0.11666	0.215382	0.248047	0.248047	0.30439	0.377761	0.474942	0.496094	0.701583	0.837373	1.02272	1.24023	1.33577	1.62515	2.44298	15.9985
0	0	0	0	0.116791	0.215481	0.248047	0.248047	0.305847	0.377814	0.475052	0.496094	0.701583	0.840295	1.02272	1.24023	1.33577	1.62697	2.44298	16.7739
0	0	0	0	0.117616	0.215983	0.248047	0.248047	0.307875	0.378142	0.475147	0.496094	0.701583	0.840559	1.02272	1.24023	1.33577	1.65552	2.44298	17.1798
0	0	0	0	0.117624	0.217426	0.248047	0.248047	0.30869	0.37975	0.475423	0.496094	0.701583	0.840578	1.02272	1.24023	1.33577	1.66395	2.44298	17.2745
0	0	0	0	0.119491	0.218159	0.248047	0.248047	0.309482	0.379985	0.477913	0.496094	0.701583	0.846894	1.02272	1.24023	1.33577	1.66395	2.44298	17.6602
0	0	0	0	0.119807	0.218432	0.248047	0.248047	0.312784	0.380079	0.47923	0.496094	0.703305	0.847457	1.02272	1.24023	1.33577	1.66395	2.44298	17.8869
0	0	0	0	0.123265	0.218432	0.248047	0.248047	0.313904	0.384274	0.480047	0.496094	0.703741	0.847691	1.02272	1.24023	1.33577	1.66395	2.45554	17.9041
0	0	0	0	0.125405	0.219119	0.248047	0.248047	0.315336	0.385773	0.481518	0.496094	0.706805	0.849619	1.02272	1.24023	1.33577	1.66395	2.46189	18.2795
0	0	0	0	0.126008	0.21954	0.248047	0.248047	0.316444	0.385792	0.482179	0.496094	0.70711	0.850347	1.02272	1.24023	1.33577	1.66395	2.48047	18.5522
0	0	0	0	0.1265	0.219712	0.248047	0.248047	0.316599	0.385814	0.482968	0.496094	0.707818	0.852939	1.02272	1.24023	1.33577	1.66395	2.48047	18.6035
0	0	0	0	0.126728	0.21997	0.248047	0.248047	0.31663	0.386121	0.483466	0.496094	0.715815	0.858234	1.02272	1.24023	1.33577	1.66395	2.48047	18.9102
0	0	0	0	0.127102	0.221538	0.248047	0.248047	0.317075	0.386577	0.484186	0.496094	0.718193	0.858604	1.02272	1.24023	1.33577	1.66395	2.48047	19.1784
0	0	0	0	0.128079	0.222751	0.248047	0.248047	0.31719	0.386786	0.489927	0.496094	0.719944	0.862005	1.02272	1.24023	1.33577	1.66395	2.48047	19.3731
0	0	0	0	0.12901	0.223715	0.248047	0.248047	0.318606	0.388321	0.495187	0.496094	0.720772	0.863951	1.02272	1.24023	1.33577	1.66395	2.49284	20.0366
0	0	0	0	0.130999	0.22404	0.248047	0.248047	0.319656	0.390557	0.495605	0.496761	0.722068	0.864958	1.02272	1.24023	1.33966	1.66825	2.49284	20.0933
0	0	0	0	0.13148	0.22449	0.248047	0.248047	0.323235	0.391886	0.496094	0.498055	0.724121	0.867219	1.02272	1.24023	1.34101	1.66945	2.49284	20.1713
0	0	0	0	0.133009	0.224713	0.248047	0.248047	0.323786	0.392493	0.496094	0.498172	0.725751	0.86832	1.02272	1.24023	1.35525	1.69611	2.49284	20.5295
0	0	0	0	0.133038	0.225125	0.248047	0.248047	0.324186	0.393059	0.496094	0.498333	0.730382	0.874005	1.02272	1.24023	1.37736	1.7061	2.49284	20.9302
0	0	0	0	0.133137	0.225299	0.248047	0.248047	0.325078	0.393723	0.496094	0.498611	0.731436	0.874647	1.02272	1.24023	1.38245	1.70677	2.49284	21.8577
0	0	0	0	0.136156	0.225767	0.248047	0.248047	0.325439	0.394758	0.496094	0.499498	0.732481	0.877021	1.02272	1.24023	1.38575	1.71035	2.49284	22.0776
0	0	0	0	0.137859	0.226956	0.248047	0.248047	0.327643	0.396258	0.496094	0.505769	0.732751	0.878523	1.02272	1.24023	1.39636	1.71048	2.49284	22.6389
0	0	0	0	0.13798	0.228144	0.248047	0.248047	0.331978	0.396363	0.496094	0.506089	0.736697	0.879525	1.02272	1.24023	1.3983	1.7196	2.52959	24.4575
0	0	0	0	0.138103	0.229052	0.248047	0.248047	0.332227	0.397315	0.496094	0.512093	0.740119	0.881636	1.02384	1.24023	1.40072	1.72026	2.52959	25.8314
0	0	0	0	0.13899	0.229832	0.248047	0.248047	0.332468	0.397611	0.496094	0.512461	0.740165	0.882565	1.02726	1.24023	1.40317	1.72414	2.52959	25.9976
0	0	0	0	0.140149	0.23004	0.248047	0.248047	0.332805	0.398363	0.496094	0.512526	0.744141	0.88479	1.02754	1.24023	1.40317	1.73633	2.52959	26.0071
0	0	0	0	0.144353	0.230461	0.248047	0.248047	0.334452	0.398365	0.496094	0.516077	0.744141	0.890768	1.02767	1.24023	1.40317	1.73633	2.52959	26.0744
0	0	0	0	0.145521	0.230804	0.248047	0.248047	0.334511	0.398756	0.496094	0.517169	0.744141	0.891223	1.0292	1.24023	1.40317	1.73633	2.53819	26.629
0	0	0	0	0.146108	0.231812	0.248047	0.248047	0.334889	0.399089	0.496094	0.51752	0.744141	0.893398	1.03172	1.24023	1.40317	1.73633	2.54037	27.1869
0	0	0	0	0.148541	0.234039	0.248047	0.248047	0.335395	0.400324	0.496094	0.52269	0.744141	0.894346	1.03213	1.24023	1.40317	1.73633	2.54762	27.2897
0	0	0	0	0.149633	0.23407	0.248047	0.248047	0.335415	0.400762	0.496094	0.523868	0.744141	0.894346	1.036	1.24023	1.40472	1.73685	2.54945	27.2908
0	0	0	0	0.150849	0.234956	0.248047	0.248047	0.336329	0.402263	0.496094	0.525942	0.744141	0.894346	1.04596	1.24023	1.40705	1.73709	2.5538	27.768
0	0	0	0	0.151254	0.235601	0.248047	0.248047	0.34034	0.402411	0.496094	0.526717	0.744141	0.894346	1.04743	1.24023	1.40718	1.74863	2.5538	28.0808
0	0	0	0	0.152818	0.236625	0.248047	0.248047	0.340718	0.402869	0.496094	0.52892	0.744141	0.894346	1.04851	1.24023	1.40869	1.75315	2.5538	28.1869
0	0	0	0	0.153811	0.237416	0.248047	0.248047	0.341914	0.40329	0.496094	0.530313	0.744141	0.894346	1.04882	1.24023	1.41365	1.75396	2.5538	28.4347
0	0	0	0	0.157294	0.237603	0.248047	0.248047	0.342145	0.40373	0.496094	0.534785	0.744141	0.894346	1.05095	1.24023	1.41702	1.75396	2.5538	28.4469
0	0	0	0	0.157838	0.238934	0.248047	0.248047	0.342996	0.403826	0.496094	0.539796	0.744141	0.894346	1.05237	1.24023	1.42141	1.75396	2.5538	28.5642
0	0	0	0	0.158207	0.239573	0.248047	0.248047	0.343354	0.404304	0.496094	0.540094	0.744141	0.894346	1.05237	1.24023	1.4294	1.75396	2.5538	28.633
0	0	0	0	0.161221	0.239636	0.248047	0.248047	0.345413	0.407665	0.496094	0.541011	0.744141	0.894346	1.05237	1.24023	1.43203	1.75396	2.5538	29.0649
0	0	0	0	0.161938	0.240419	0.248047	0.248047	0.347346	0.407873	0.496094	0.547136	0.744141	0.894346	1.05237	1.24023	1.43746	1.75396	2.5538	29.3462
0	0	0	0	0.161943	0.240888	0.248047	0.248047	0.349272	0.409155	0.496094	0.548386	0.744141	0.894346	1.05237	1.24023	1.43979	1.75396	2.55909	29.5998
0	0	0	0	0.162099	0.241946	0.248047	0.248047	0.350207	0.409992	0.496094	0.549154	0.744141	0.894346	1.05237	1.24023	1.44497	1.75396	2.58969	29.6932
0	0	0	0	0.162253	0.244261	0.248047	0.248047	0.350791	0.412302	0.496094	0.551277	0.744141	0.894346	1.05237	1.24023	1.44635	1.75396	2.58969	29.8997
0	0	0	0	0.162802	0.246187	0.248047	0.248047	0.350791	0.413333	0.496094	0.55465	0.744141	0.894346	1.05237	1.24023	1.44635	1.75396	2.58969	30.0331
0	0	0	0	0.164701	0.246283	0.248047	0.248047	0.350791	0.414296	0.496094	0.55465	0.744141	0.894346	1.05288	1.24023	1.44635	1.75396	2.58969	30.3571
0	0	0	0	0.165481	0.246513	0.248047	0.248047	0.350791	0.415671	0.496094	0.55465	0.744141	0.894346	1.05521	1.24023	1.44635	1.75396	2.58969	30.3683
0	0	0	0	0.166741	0.248047	0.248047	0.248047	0.350791	0.415822	0.496094	0.55465	0.744141	0.894346	1.05845	1.24023	1.44635	1.75396	2.58969	30.5863
0	0	0	0	0.168292	0.248047	0.248047	0.248047	0.350791	0.41804	0.496094	0.55465	0.744141	0.894346	1.05852	1.24023	1.44635	1.75396	2.58969	30.8078
0	0	0	0	0.172486	0.248047	0.248047	0.248047	0.350791	0.41828	0.496094	0.55465	0.744141	0.898185	1.05857	1.24023	1.44635	1.75396	2.60649	30.8746
0	0	0	0	0.173315	0.248047	0.248047	0.248047	0.350791	0.418333	0.496094	0.55465	0.744141	0.898387	1.05979	1.24023	1.44635	1.75396	2.62855	30.9105
0	0	0	0	0.174543	0.248047	0.248047	0.248047	0.350791	0.419363	0.496094	0.55465	0.744141	0.900975	1.06445	1.24023	1.44635	1.75396	2.63233	31.0693
0	0	0	0	0.17461	0.248047	0.248047	0.248047	0.350791	0.419561	0.496094	0.55465	0.744141	0.902919	1.06695	1.24023	1.44635	1.75396	2.63302	31.1484
0	0	0	0	0.175563	0.248047	0.248047	0.248047	0.350791	0.424853	0.496094	0.55465	0.744141	0.907711	1.06709	1.24023	1.44635	1.75396	2.63618	31.2854
0	0	0	0	0.175567	0.248047	0.248047	0.248047	0.350791	0.425263	0.496094	0.55465	0.744141	0.909614	1.07058	1.24023	1.44635	1.75396	2.63677	31.3021
0	0	0	0	0.176549	0.248047	0.248047	0.248047	0.350791	0.425648	0.496094	0.55465	0.744141	0.91282	1.07192	1.24023	1.44635	1.75396	2.64491	31.3139
0	0	0	0	0.178588	0.248047	0.248047	0.248047	0.350791	0.428906	0.496094	0.55465	0.744141	0.913629	1.07223	1.24023	1.44635	1.75396	2.67155	31.9393
0	0	0	0	0.179289	0.248047	0.248047	0.248047	0.350791	0.430541	0.496094	0.55465	0.744141	0.914258	1.07338	1.24023	1.44635	1.75396	2.67155	32.0067
0	0	0	0	0.179378	0.248047	0.248047	0.248047	0.350791	0.434201	0.496094	0.55465	0.744141	0.915426	1.07451	1.24023	1.44635	1.75396	2.67155	32.0912
0	0	0	0	0.179953	0.248047	0.248047	0.248047	0.350791	0.435114	0.496094	0.55465	0.744141	0.918071	1.07547	1.24023	1.44635	1.75396	2.67155	32.1697
0	0	0	0	0.181611	0.248047	0.248047	0.248047	0.350791	0.438008	0.496094	0.55465	0.744141	0.91959	1.07563	1.24023	1.44635	1.75396	2.67155	32.5396
0	0	0	0	0.183166	0.248047	0.248047	0.248047	0.350791	0.438554	0.496094	0.55465	0.744141	0.920163	1.07601	1.24023	1.44635	1.75396	2.67155	32.7431
0	0	0	0	0.183844	0.248047	0.248047	0.248047	0.350791	0.439883	0.496094	0.55465	0.744141	0.92239	1.07753	1.24023	1.44635	1.75396	2.68304	33.1502
0	0	0	0	0.185794	0.248047	0.248047	0.248047	0.350791	0.440335	0.496094	0.55465	0.744141	0.922464	1.07814	1.24023	1.44635	1.75396	2.68304	33.1948
0	0	0	0.00806152	0.186497	0.248047	0.248047	0.248047	0.350791	0.440431	0.496094	0.55465	0.744141	0.924862	1.07817	1.24023	1.44635	1.75396	2.68304	33.6513
0	0	0	0.0205149	0.187051	0.248047	0.248047	0.248047	0.350791	0.440756	0.496094	0.55465	0.744141	0.92859	1.08426	1.24023	1.44635	1.75396	2.68304	34.3032
0	0	0	0.0211572	0.187286	0.248047	0.248047	0.248047	0.350791	0.441468	0.496094	0.55465	0.744141	0.930525	1.0849	1.24023	1.44635	1.75396	2.68842	34.4821
0	0	0	0.0365669	0.188067	0.248047	0.248047	0.248047	0.350791	0.442672	0.496094	0.55465	0.744141	0.931299	1.08761	1.24023	1.44635	1.75396	2.69261	34.6068
0	0	0	0.0416905	0.188292	0.248047	0.248047	0.248047	0.350791	0.442816	0.496094	0.55465	0.744141	0.932272	1.08806	1.24023	1.44635	1.75396	2.70551	34.9394
0	0	0	0.0423981	0.188693	0.248047	0.248047	0.248047	0.350791	0.443015	0.496094	0.55465	0.744141	0.935346	1.08918	1.24023	1.44635	1.75396	2.70995	36.462
0	0	0	0.0438521	0.188729	0.248047	0.248047	0.248047	0.350791	0.44506	0.496094	0.55465	0.744141	0.944316	1.09007	1.24023	1.44635	1.75396	2.71593	36.5901
0	0	0	0.0466409	0.189706	0.248047	0.248047	0.248047	0.350791	0.445267	0.496094	0.55465	0.744141	0.944646	1.09256	1.24023	1.44635	1.75396	2.72628	36.9997
0	0	0	0.0477864	0.191233	0.248047	0.248047	0.248047	0.350791	0.446117	0.496094	0.55465	0.744141	0.947853	1.09523	1.24023	1.44635	1.7567	2.72852	38.0806
0	0	0	0.0500811	0.191333	0.248047	0.248047	0.248047	0.350791	0.446533	0.496094	0.55465	0.744141	0.948908	1.09669	1.24023	1.44635	1.75778	2.72852	38.4305
0	0	0	0.0514847	0.191983	0.248047	0.248047	0.248047	0.350791	0.446835	0.496094	0.55465	0.744141	0.951915	1.09671	1.24023	1.44635	1.75928	2.73977	38.5056
0	0	0	0.0542835	0.192723	0.248047	0.248047	0.248047	0.350791	0.447983	0.496094	0.55465	0.744141	0.952104	1.10026	1.24023	1.44635	1.75975	2.73977	38.6269
0	0	0	0.0571548	0.194842	0.248047	0.248047	0.248047	0.350791	0.45006	0.496094	0.55465	0.744141	0.957613	1.10204	1.24023	1.44635	1.76067	2.73977	38.638
0	0	0	0.059396	0.195242	0.248047	0.248047	0.248047	0.350791	0.453005	0.496094	0.55465	0.744141	0.958067	1.10347	1.24023	1.44635	1.76147	2.77325	38.9868
0	0	0	0.0597171	0.19558	0.248047	0.248047	0.248047	0.350791	0.455082	0.496094	0.555501	0.744141	0.958565	1.10399	1.24023	1.44635	1.77202	2.77325	39.7154
0	0	0	0.0600131	0.197187	0.248047	0.248047	0.248047	0.350791	0.455387	0.496094	0.558417	0.744141	0.963506	1.10611	1.24023	1.44635	1.77529	2.77325	40.1759
0	0	0	0.0618325	0.199062	0.248047	0.248047	0.248047	0.350791	0.457782	0.496094	0.55932	0.744141	0.964069	1.10655	1.24023	1.44635	1.77582	2.77325	40.8668
0	0	0	0.0640899	0.199131	0.248047	0.248047	0.250099	0.350791	0.457994	0.496094	0.560726	0.744141	0.964537	1.1072	1.24023	1.44635	1.77796	2.77325	41.1264
0	0	0	0.0652495	0.200472	0.248047	0.248047	0.250744	0.350791	0.458434	0.496094	0.562456	0.744141	0.965963	1.1078	1.24023	1.44635	1.783	2.77325	41.2183
0	0	0	0.0670014	0.200698	0.248047	0.248047	0.252087	0.350791	0.460405	0.496094	0.562868	0.744141	0.966315	1.10783	1.24023	1.44635	1.78387	2.77325	41.5751
0	0	0	0.0711861	0.20103	0.248047	0.248047	0.255319	0.351094	0.460572	0.496094	0.563569	0.744141	0.966525	1.10871	1.24023	1.44635	1.78869	2.77325	41.6519
0	0	0	0.0713463	0.201726	0.248047	0.248047	0.256871	0.351535	0.463466	0.496094	0.570069	0.744141	0.969356	1.1093	1.24454	1.44635	1.78869	2.77325	41.7523
0	0	0	0.0714392	0.201791	0.248047	0.248047	0.257247	0.352065	0.463501	0.496094	0.572833	0.744141	0.973352	1.1093	1.25716	1.44635	1.78869	2.77325	41.8384
0	0	0	0.0758442	0.203742	0.248047	0.248047	0.260241	0.35312	0.464083	0.496094	0.572955	0.744141	0.973833	1.1093	1.26198	1.44635	1.78869	2.77325	42.122
0	0	0	0.0767721	0.2045	0.248047	0.248047	0.260335	0.354205	0.46692	0.496094	0.573502	0.744141	0.974555	1.1093	1.2648	1.44937	1.78869	2.77325	42.1833
0	0	0	0.0776994	0.205024	0.248047	0.248047	0.261536	0.354335	0.469169	0.496094	0.574925	0.744141	0.974887	1.1093	1.2648	1.45287	1.78869	2.77325	42.2911
0	0	0	0.0783084	0.20552	0.248047	0.248047	0.262804	0.355551	0.469966	0.496094	0.574948	0.744141	0.975825	1.1093	1.2648	1.45296	1.78869	2.77325	42.3863
0	0	0	0.0793867	0.205665	0.248047	0.248047	0.263583	0.355971	0.470243	0.496094	0.576969	0.744167	0.977966	1.1093	1.2648	1.45337	1.78869	2.77325	42.4225
0	0	0	0.0804783	0.206219	0.248047	0.248047	0.26559	0.356757	0.470365	0.496094	0.577631	0.74698	0.980739	1.1093	1.2648	1.45567	1.78869	2.77325	42.5348
0	0	0	0.0817879	0.206384	0.248047	0.248047	0.268714	0.357639	0.470465	0.496094	0.579297	0.747217	0.981435	1.1093	1.2648	1.46064	1.79255	2.77325	42.5384
0	0	0	0.0819855	0.208453	0.248047	0.248047	0.271487	0.358872	0.470796	0.496094	0.579414	0.750256	0.982393	1.1093	1.2648	1.46524	1.79818	2.77325	42.5977
0	0	0	0.0832176	0.208534	0.248047	0.248047	0.27179	0.360581	0.475269	0.496094	0.583225	0.750473	0.982897	1.1093	1.2648	1.47101	1.79864	2.77325	42.6302
0	0	0	0.0833029	0.208563	0.248047	0.248047	0.273305	0.361906	0.476323	0.496094	0.583691	0.751029	0.98399	1.1093	1.2648	1.47133	1.80326	2.77325	42.7944
0	0	0	0.0840249	0.208707	0.248047	0.248047	0.273586	0.362361	0.478064	0.496094	0.584197	0.759101	0.986177	1.1093	1.2648	1.47297	1.80581	2.77325	42.9014
0	0	0	0.0842589	0.208839	0.248047	0.248047	0.276995	0.364028	0.47812	0.496094	0.586749	0.765893	0.986948	1.1093	1.2648	1.47314	1.80581	2.77325	43.1152
0	0	0	0.0867611	0.209449	0.248047	0.248047	0.277153	0.364163	0.479293	0.496094	0.588175	0.76754	0.98894	1.1093	1.2648	1.47613	1.80581	2.80633	43.1701
0	0	0	0.0871814	0.209509	0.248047	0.248047	0.277374	0.364544	0.480044	0.496094	0.58907	0.768233	0.989072	1.1093	1.2648	1.47654	1.80581	2.80633	43.4557
0	0	0	0.0874962	0.210692	0.248047	0.248047	0.277924	0.364947	0.481307	0.496094	0.590268	0.768457	0.989651	1.1093	1.2648	1.48363	1.80581	2.82	43.5123
0	0	0	0.0881661	0.210815	0.248047	0.248047	0.27829	0.365029	0.481341	0.496094	0.592725	0.77446	0.992188	1.1093	1.2648	1.48828	1.80581	2.82817	43.6069
0	0	0	0.0885309	0.211867	0.248047	0.248047	0.279445	0.365506	0.481952	0.496094	0.5928	0.776976	0.992188	1.1093	1.2648	1.48828	1.80713	2.82817	43.7365
0	0	0	0.0901661	0.211877	0.248047	0.248047	0.279657	0.366663	0.48243	0.496094	0.592918	0.77813	0.992188	1.1093	1.2648	1.48828	1.81363	2.82817	43.8166
0	0	0	0.0904726	0.212499	0.248047	0.248047	0.279829	0.367004	0.483795	0.496094	0.593162	0.778247	0.992188	1.1093	1.2648	1.48828	1.81482	2.82817	43.989
0	0	0	0.0909203	0.213358	0.248047	0.248047	0.280569	0.369149	0.485314	0.496094	0.593703	0.778269	0.992188	1.1093	1.2648	1.48828	1.81533	2.82817	44.3121
0	0	0	0.0913149	0.213377	0.248047	0.248047	0.280718	0.369993	0.487392	0.496094	0.594007	0.780697	0.992188	1.1093	1.2648	1.48828	1.82283	2.83296	44.6105
0	0	0	0.0953097	0.213662	0.248047	0.248047	0.28189	0.370038	0.489585	0.496094	0.59445	0.782735	0.992188	1.1093	1.2648	1.48828	1.82531	2.84709	44.7895
0	0	0	0.0974243	0.214079	0.248047	0.248047	0.284038	0.371066	0.490798	0.496094	0.596435	0.784393	0.992188	1.1093	1.2648	1.48828	1.84348	2.85588	44.9232
0	0	0	0.0976805	0.214292	0.248047	0.248047	0.285056	0.371411	0.492263	0.496094	0.60382	0.784393	0.992188	1.1093	1.2648	1.48828	1.8467	2.86354	45.509
0	0	0	0.0990839	0.214384	0.248047	0.248047	0.287733	0.371576	0.492669	0.496094	0.60504	0.784393	0.992188	1.1093	1.2648	1.48828	1.85669	2.88766	45.9289
0	0	0	0.100361	0.214642	0.248047	0.248047	0.289398	0.374168	0.49433	0.496094	0.606854	0.784393	0.992188	1.1093	1.2648	1.48828	1.86576	2.88911	45.9657
0	0	0	0.100384	0.215209	0.248047	0.248047	0.289743	0.374277	0.494638	0.496094	0.607546	0.784393	0.992188	1.1093	1.2648	1.48828	1.87995	2.8927	46.0393
0	0	0	0.102038	0.215301	0.248047	0.248047	0.290666	0.374576	0.495096	0.496094	0.612087	0.784393	0.992188	1.1093	1.2648	1.48828	1.88631	2.8927	46.082
0	0	0	0.102607	0.215569	0.248047	0.248047	0.290914	0.376196	0.495141	0.496094	0.614996	0.784393	0.992188	1.1093	1.2648	1.48828	1.88907	2.8927	46.1394
0	0	0	0.104816	0.215856	0.248047	0.248047	0.290989	0.376762	0.495193	0.496094	0.617512	0.784393	0.992188	1.11411	1.2648	1.48828	1.88907	2.8927	46.5146
0	0	0	0.106207	0.216204	0.248047	0.248047	0.291103	0.379605	0.495572	0.496094	0.617545	0.784393	0.992188	1.11631	1.2648	1.49604	1.88907	2.8927	46.576
0	0	0	0.108913	0.216859	0.248047	0.248047	0.294827	0.379927	0.495578	0.496094	0.617629	0.784393	0.992188	1.11925	1.2648	1.49798	1.88907	2.90046	46.8959
0	0	0	0.109519	0.221418	0.248047	0.248047	0.294887	0.379989	0.49589	0.496094	0.619685	0.784393	0.992188	1.12078	1.2648	1.50057	1.88907	2.90331	47.0198
0	0	0	0.109774	0.22187	0.248047	0.248047	0.295617	0.383196	0.496094	0.496094	0.62532	0.784393	0.992188	1.12486	1.2648	1.50097	1.88907	2.90331	47.0453
0	0	0	0.110169	0.225415	0.248047	0.248047	0.296603	0.383557	0.496094	0.496094	0.63068	0.784393	0.992188	1.12776	1.2648	1.50254	1.88907	2.92254	47.0897
0	0	0	0.110367	0.225424	0.248047	0.248047	0.296886	0.383918	0.496094	0.496094	0.633644	0.784393	0.992188	1.13783	1.2648	1.50359	1.88907	2.93704	47.1694
0	0	0	0.110612	0.225556	0.248047	0.248047	0.297175	0.384279	0.496094	0.496094	0.633801	0.784393	0.992188	1.13821	1.2648	1.50433	1.88907	2.95289	47.4101
0	0	0	0.110964	0.226105	0.248047	0.248047	0.298492	0.385011	0.496094	0.496094	0.637076	0.784393	0.992188	1.14401	1.2648	1.50487	1.88907	2.95497	47.6379
0	0	0	0.113101	0.227059	0.248047	0.248047	0.299959	0.385593	0.496094	0.496094	0.642286	0.784393	0.992188	1.14472	1.2648	1.50756	1.89354	2.95504	47.6779
0	0	0	0.113872	0.227592	0.248047	0.248047	0.30289	0.386043	0.496094	0.496094	0.64315	0.784393	0.992188	1.14601	1.2648	1.50881	1.90775	2.95912	47.8396
0	0	0	0.114453	0.227851	0.248047	0.248047	0.303381	0.386341	0.496094	0.496094	0.646771	0.784393	0.992188	1.14831	1.2648	1.50881	1.91053	2.96108	48.1268
0	0	0	0.114582	0.228056	0.248047	0.248047	0.303909	0.387424	0.496094	0.496094	0.647469	0.784393	0.992188	1.15014	1.2648	1.50881	1.91762	2.97594	48.5874
0	0	0	0.116443	0.22896	0.248047	0.248047	0.307389	0.388717	0.496094	0.496094	0.648927	0.784393	0.992188	1.15806	1.2648	1.50881	1.924	2.97656	48.6488
0	0	0	0.11694	0.229278	0.248047	0.248047	0.308304	0.39089	0.496094	0.496094	0.649025	0.784393	0.992188	1.15913	1.2648	1.50881	1.9267	2.97656	48.7335
0	0	0	0.117263	0.229622	0.248047	0.248047	0.308835	0.391063	0.496094	0.496094	0.650024	0.784393	0.992188	1.16263	1.2648	1.50881	1.93731	2.97656	49.2215
0	0	0	0.117299	0.231547	0.248047	0.248047	0.309672	0.392204	0.496094	0.496094	0.650112	0.784393	0.992188	1.16322	1.2648	1.50881	1.93731	2.97656	49.327
0	0	0	0.119303	0.231631	0.248047	0.248047	0.310004	0.39282	0.496094	0.496094	0.653373	0.784393	0.992188	1.16474	1.2648	1.50881	1.93731	2.97656	49.3389
0	0	0	0.122111	0.234217	0.248047	0.248047	0.310055	0.3931	0.496094	0.496094	0.656714	0.784393	0.992188	1.16559	1.2648	1.50881	1.93731	2.9803	49.4535
0	0	0	0.122953	0.234502	0.248047	0.248047	0.312018	0.393538	0.496094	0.496094	0.659151	0.784393	0.992188	1.16666	1.2648	1.50881	1.93731	2.98688	49.6156
0	0	0	0.123217	0.234517	0.248047	0.248047	0.312026	0.393638	0.496094	0.496094	0.659713	0.784393	0.992188	1.16829	1.2648	1.51171	1.93731	2.98688	50.4579
0	0	0	0.125345	0.235049	0.248047	0.248047	0.315385	0.393734	0.496094	0.496094	0.659822	0.785804	0.992188	1.1684	1.2648	1.51303	1.93731	2.98688	50.4579
0	0	0	0.125469	0.235558	0.248047	0.248047	0.316116	0.394613	0.496094	0.496094	0.661838	0.785954	0.992188	1.16861	1.2648	1.51441	1.93731	2.98688	50.8956
0	0	0	0.126414	0.23604	0.248047	0.248047	0.316122	0.395782	0.496094	0.496094	0.66234	0.786337	0.992188	1.16891	1.26529	1.51614	1.93731	2.98688	50.9173
0	0	0	0.126461	0.238206	0.248047	0.248047	0.316142	0.397708	0.496094	0.496094	0.664566	0.787475	0.992188	1.16957	1.26667	1.52251	1.93731	2.98688	51.4917
0	0	0	0.128186	0.239329	0.248047	0.248047	0.31675	0.39777	0.496094	0.49872	0.668334	0.787681	0.992188	1.17044	1.26783	1.52295	1.93731	2.98688	52.0928
0	0	0	0.128294	0.240149	0.248047	0.248047	0.316984	0.398208	0.496094	0.502696	0.668702	0.789765	0.992188	1.17073	1.27519	1.52684	1.93731	2.99716	52.47
0	0	0	0.128482	0.2403	0.248047	0.248047	0.31711	0.399022	0.496094	0.502781	0.669517	0.790776	0.992188	1.17771	1.27655	1.53211	1.93731	2.99716	52.8811
0	0	0	0.129171	0.240347	0.248047	0.248047	0.318061	0.399774	0.496094	0.504408	0.670613	0.791043	0.992188	1.17929	1.27673	1.53217	1.95339	2.99716	53.4724
0	0	0	0.130499	0.241021	0.248047	0.248047	0.319015	0.400959	0.496094	0.50653	0.680907	0.795405	0.992188	1.1857	1.27935	1.5412	1.95963	2.99716	53.9563
0	0	0	0.131163	0.241533	0.248047	0.248047	0.319522	0.401419	0.496094	0.507894	0.684771	0.797356	0.992188	1.19239	1.27947	1.54431	1.9642	2.99716	54.0321
0	0	0	0.131917	0.243588	0.248047	0.248047	0.321198	0.402072	0.496094	0.509368	0.685865	0.7975	0.992188	1.19433	1.28011	1.54663	1.9773	2.99716	55.8017
0	0	0	0.132971	0.244427	0.248047	0.248047	0.321398	0.402888	0.496094	0.511213	0.686693	0.798587	0.992188	1.19555	1.29046	1.54731	1.98438	2.99716	55.8464
0	0	0	0.133206	0.244459	0.248047	0.248047	0.322623	0.403022	0.496094	0.511859	0.687207	0.799163	0.992188	1.19566	1.29239	1.5483	1.98438	2.99716	57.9358
0	0	0	0.133554	0.244687	0.248047	0.248047	0.322734	0.404018	0.496094	0.513056	0.691039	0.801153	0.992188	1.19773	1.29311	1.55169	1.98438	2.99716	59.5028
0	0	0	0.133656	0.245457	0.248047	0.248047	0.323154	0.40503	0.496094	0.514651	0.692252	0.801156	0.992188	1.19982	1.29663	1.55361	1.98438	2.99716	61.0241
0	0	0	0.134144	0.246017	0.248047	0.248047	0.323472	0.406339	0.496094	0.514697	0.692341	0.801166	0.992188	1.20255	1.29771	1.55806	1.98438	3.01582	62.1812
0	0	0	0.134819	0.246242	0.248047	0.248047	0.3242	0.406477	0.496094	0.514775	0.692587	0.808011	0.992188	1.20666	1.29949	1.55858	1.98438	3.01721	63.2719
0	0	0	0.134935	0.246419	0.248047	0.248047	0.32637	0.406523	0.496094	0.515566	0.693447	0.810144	0.992188	1.20683	1.30301	1.56879	1.99466	3.0278	63.8175
0	0	0	0.136282	0.247107	0.248047	0.248047	0.327442	0.408068	0.496094	0.517502	0.695009	0.81017	0.992188	1.20861	1.3048	1.56879	1.99512	3.0278	64.6013
0	0	0	0.13632	0.247381	0.248047	0.248047	0.327522	0.408678	0.496094	0.520129	0.698169	0.812412	0.992188	1.21008	1.30482	1.56879	1.99982	3.0278
0	0	0	0.13783	0.247707	0.248047	0.248047	0.329402	0.408793	0.496094	0.521154	0.699049	0.812838	0.992188	1.21442	1.31151	1.56879	1.99982	3.0278
0	0	0	0.138554	0.248047	0.248047	0.248047	0.330778	0.409169	0.496094	0.522401	0.699325	0.814643	0.992188	1.2157	1.31246	1.56879	1.99982	3.0278
0	0	0	0.140822	0.248047	0.248047	0.248047	0.33129	0.409808	0.496094	0.523254	0.700329	0.815671	0.992188	1.21799	1.31286	1.56879	1.99982	3.0278
0	0	0	0.142504	0.248047	0.248047	0.248047	0.333566	0.409888	0.496094	0.52465	0.700549	0.816187	0.992188	1.21843	1.31377	1.56879	1.99982	3.0278
0	0	0	0.143455	0.248047	0.248047	0.248047	0.333822	0.410083	0.496094	0.527174	0.701583	0.817871	0.992188	1.22093	1.31393	1.56879	1.99982	3.0278
0	0	0	0.143941	0.248047	0.248047	0.248047	0.334146	0.41018	0.496094	0.527309	0.701583	0.817932	0.992188	1.22385	1.31431	1.56879	1.99982	3.0278
0	0	0	0.144806	0.248047	0.248047	0.248047	0.334155	0.411103	0.496094	0.527349	0.701583	0.81977	0.992188	1.22429	1.31742	1.56879	1.99982	3.02897
0	0	0	0.145193	0.248047	0.248047	0.248047	0.335116	0.4126	0.496094	0.527364	0.701583	0.821237	0.992188	1.23016	1.3191	1.56879	1.99982	3.03399
0	0	0	0.145532	0.248047	0.248047	0.248047	0.336096	0.412937	0.496094	0.53255	0.701583	0.822098	0.992188	1.23202	1.3218	1.56879	1.99982	3.03486
0	0	0	0.149976	0.248047	0.248047	0.248047	0.337214	0.414428	0.496094	0.533717	0.701583	0.824871	0.992188	1.23421	1.32517	1.56879	1.99982	3.03967
0	0	0	0.150056	0.248047	0.248047	0.248047	0.337385	0.415994	0.496094	0.535468	0.701583	0.826397	0.992188	1.23905	1.32593	1.56879	1.99982	3.06817
0	0	0	0.150143	0.248047	0.248047	0.248047	0.337502	0.416712	0.496094	0.535876	0.701583	0.827925	0.992408	1.24001	1.32752	1.56879	1.99982	3.06817
0	0	0	0.150168	0.248047	0.248047	0.248047	0.33834	0.417187	0.496094	0.537538	0.701583	0.832664	0.993406	1.24023	1.33074	1.56985	1.99982	3.07299
0	0	0	0.15049	0.248047	0.248047	0.248047	0.338429	0.417811	0.496094	0.537628	0.701583	0.834849	0.993919	1.24023	1.33577	1.57659	1.99982	3.10204
0	0	0	0.150854	0.248047	0.248047	0.248047	0.339032	0.418175	0.496094	0.537828	0.701583	0.835563	0.99445	1.24023	1.33577	1.57815	1.99982	3.10306
0	0	0	0.151303	0.248047	0.248047	0.248047	0.339033	0.418597	0.496094	0.538334	0.701583	0.837311	0.996443	1.24023	1.33577	1.58827	2.00634	3.10802
0	0	0	0.151311	0.248047	0.248047	0.248047	0.339098	0.419692	0.496094	0.539049	0.701583	0.837645	0.998592	1.24023	1.33577	1.58827	2.01461	3.10802
0	0	0	0.152702	0.248047	0.248047	0.248047	0.340892	0.419793	0.496094	0.539799	0.701583	0.837926	1.00173	1.24023	1.33577	1.58827	2.01463	3.10802
0	0	0	0.153694	0.248047	0.248047	0.248047	0.341347	0.42089	0.496094	0.540209	0.701583	0.839166	1.00324	1.24023	1.33577	1.58827	2.02637	3.13757
0	0	0	0.154123	0.248047	0.248047	0.248047	0.341496	0.421963	0.496094	0.541196	0.701583	0.842249	1.00497	1.24023	1.33577	1.58827	2.03923	3.14062
0	0	0	0.155082	0.248047	0.248047	0.248047	0.342304	0.422472	0.496094	0.546047	0.701583	0.846202	1.00622	1.24023	1.33577	1.58827	2.04545	3.15399
0	0	0	0.155535	0.248047	0.248047	0.248047	0.342682	0.424374	0.496094	0.549195	0.701583	0.849095	1.00722	1.24023	1.33577	1.58827	2.04545	3.15435
0	0	0	0.156049	0.248047	0.248047	0.248047	0.344694	0.424754	0.496094	0.549894	0.701583	0.849667	1.00833	1.24023	1.33577	1.58827	2.04545	3.15712
0	0	0	0.156846	0.248047	0.248047	0.248047	0.345052	0.426578	0.496094	0.551009	0.701583	0.851159	1.0084	1.24023	1.33577	1.58827	2.0929	3.16689
0	0	0	0.156944	0.248047	0.248047	0.248047	0.345732	0.42813	0.496094	0.551739	0.701583	0.85344	1.01022	1.24023	1.33577	1.58827	2.10475	3.17655
0	0	0	0.156955	0.248047	0.248047	0.248047	0.346425	0.428921	0.496094	0.552179	0.701583	0.85531	1.01072	1.24023	1.33577	1.58827	2.10475	3.17655
0	0	0	0.157395	0.248047	0.248047	0.248047	0.346862	0.430053	0.496094	0.55465	0.701583	0.855324	1.01226	1.24023	1.33577	1.58827	2.10475	3.17655
0	0	0	0.157544	0.248047	0.248047	0.248047	0.349468	0.430601	0.496094	0.55465	0.703783	0.858217	1.01419	1.24023	1.33577	1.58827	2.10475	3.17655
0	0	0	0.157821	0.248047	0.248047	0.248047	0.350156	0.43136	0.496094	0.55465	0.705493	0.859255	1.01706	1.24023	1.33577	1.58827	2.10475	3.17655
0	0	0	0.157867	0.248047	0.248047	0.248047	0.350791	0.431797	0.496094	0.55465	0.706707	0.859577	1.01861	1.24023	1.33577	1.58827	2.11931	3.17655
0	0	0	0.159487	0.248047	0.248047	0.248047	0.350791	0.433254	0.496094	0.55465	0.711064	0.863202	1.02272	1.24023	1.33577	1.58827	2.11931	3.17655
0	0	0	0.160336	0.248047	0.248047	0.248047	0.350791	0.434457	0.496094	0.55465	0.714848	0.86369	1.02272	1.24023	1.33577	1.58827	2.11931	3.17655
0	0	0	0.160377	0.248047	0.248047	0.248047	0.350791	0.434582	0.496094	0.55465	0.715015	0.863856	1.02272	1.24023	1.33577	1.58827	2.11931	3.17655
0	0	0	0.160632	0.248047	0.248047	0.248047	0.350791	0.435559	0.496094	0.55465	0.71702	0.866261	1.02272	1.24023	1.33577	1.58827	2.11931	3.17655
0	0	0	0.160665	0.248047	0.248047	0.248047	0.350791	0.43571	0.496094	0.55465	0.718421	0.869176	1.02272	1.24023	1.33577	1.58827	2.11931	3.17655
0	0	0	0.160985	0.248047	0.248047	0.248047	0.350791	0.435953	0.496094	0.55465	0.719701	0.871229	1.02272	1.24023	1.33577	1.58827	2.13378	3.22461
0	0	0	0.161437	0.248047	0.248047	0.248047	0.350791	0.438247	0.496094	0.55465	0.720536	0.871378	1.02272	1.24023	1.33577	1.58827	2.13378	3.22461
0	0	0	0.161554	0.248047	0.248047	0.248047	0.350791	0.438807	0.496094	0.55465	0.720588	0.87388	1.02272	1.24023	1.33577	1.58827	2.13378	3.22461
0	0	0	0.161753	0.248047	0.248047	0.248047	0.350791	0.438989	0.496094	0.55465	0.721798	0.874495	1.02272	1.24023	1.33577	1.58827	2.13378	3.22461
0	0	0	0.163156	0.248047	0.248047	0.248047	0.350791	0.444748	0.496094	0.55465	0.721832	0.875615	1.02272	1.24023	1.33577	1.58827	2.13378	3.22461
0	0	0	0.163427	0.248047	0.248047	0.248047	0.350791	0.445267	0.496094	0.55465	0.722072	0.877194	1.02272	1.24023	1.33577	1.58827	2.13378	3.22461
0	0	0	0.16452	0.248047	0.248047	0.248047	0.350791	0.446133	0.496094	0.55465	0.724048	0.87952	1.02272	1.24023	1.33577	1.58827	2.13378	3.23414
0	0	0	0.164598	0.248047	0.248047	0.248047	0.350791	0.44677	0.496094	0.55465	0.728393	0.879864	1.02272	1.24023	1.33577	1.58827	2.13378	3.23414
0	0	0	0.165288	0.248047	0.248047	0.248047	0.350791	0.447038	0.496094	0.55465	0.729163	0.880599	1.02272	1.24023	1.33577	1.58827	2.13378	3.23414
0	0	0	0.165301	0.248047	0.248047	0.248047	0.350791	0.448511	0.496094	0.55465	0.734016	0.88124	1.02272	1.24023	1.33577	1.58827	2.13378	3.23414
0	0	0	0.166894	0.248047	0.248047	0.248047	0.350791	0.448675	0.496094	0.55465	0.734512	0.883386	1.02272	1.24023	1.33577	1.58827	2.14967	3.28021
0	0	0	0.167913	0.248047	0.248047	0.248047	0.350791	0.448686	0.496094	0.55465	0.736054	0.883972	1.02272	1.24023	1.33577	1.58827	2.1645	3.30936
0	0	0	0.168864	0.248047	0.248047	0.248047	0.350791	0.449593	0.496094	0.55465	0.73673	0.885043	1.02272	1.24023	1.33577	1.58827	2.19039	3.30936
0	0	0	0.169374	0.248047	0.248047	0.248047	0.350791	0.449912	0.496094	0.55465	0.736825	0.888117	1.02272	1.24023	1.33577	1.58827	2.19268	3.3279
0	0	0	0.170439	0.248047	0.248047	0.248047	0.350791	0.450091	0.496094	0.55465	0.736967	0.890792	1.02272	1.24023	1.33577	1.58827	2.19985	3.3279
0	0	0	0.170481	0.248047	0.248047	0.248047	0.350791	0.450411	0.496094	0.55465	0.73705	0.892059	1.02272	1.24023	1.33577	1.58827	2.20841	3.33713
0	0	0.0220472	0.170897	0.248047	0.248047	0.248047	0.350791	0.450685	0.496094	0.55465	0.737898	0.894059	1.02272	1.24023	1.33577	1.58827	2.21688	3.33713
0	0	0.0238335	0.17114	0.248047	0.248047	0.248047	0.350791	0.450701	0.496094	0.55465	0.739283	0.894346	1.02272	1.24023	1.33577	1.58827	2.21794	3.33713
0	0	0.0256372	0.172129	0.248047	0.248047	0.248201	0.350791	0.450751	0.496094	0.55465	0.73947	0.894346	1.02272	1.24023	1.33577	1.58827	2.2186	3.33713
0	0	0.0321709	0.1727	0.248047	0.248047	0.249535	0.350791	0.452103	0.496094	0.55465	0.740466	0.894346	1.02272	1.24023	1.33577	1.58827	2.2186	3.33713
0	0	0.0349825	0.172713	0.248047	0.248047	0.250608	0.350791	0.454184	0.496094	0.55465	0.74182	0.894346	1.02272	1.24023	1.33577	1.58827	2.2186	3.33713
0	0	0.0354961	0.173467	0.248047	0.248047	0.253872	0.350791	0.454675	0.496094	0.55465	0.74248	0.894346	1.02272	1.24023	1.33577	1.58827	2.2186	3.33713
0	0	0.0370789	0.174402	0.248047	0.248047	0.254441	0.350791	0.45522	0.496094	0.55465	0.744141	0.894346	1.02272	1.24023	1.33577	1.58827	2.2186	3.33713
0	0	0.0396497	0.174519	0.248047	0.248047	0.255738	0.350791	0.455756	0.496094	0.55465	0.744141	0.894346	1.02272	1.24023	1.33577	1.59223	2.23242	3.33713
0	0	0.0405786	0.174532	0.248047	0.248047	0.255905	0.350791	0.457245	0.496094	0.55465	0.744141	0.894346	1.02272	1.24023	1.33577	1.59685	2.23242	3.33713
0	0	0.0415895	0.17569	0.248047	0.248047	0.257894	0.350791	0.45875	0.496094	0.55465	0.744141	0.894346	1.02272	1.24023	1.33577	1.59756	2.23242	3.33713
0	0	0.0428052	0.177014	0.248047	0.248047	0.260014	0.350791	0.458756	0.496094	0.55465	0.744141	0.894346	1.02272	1.24023	1.33577	1.60326	2.23242	3.3738
0	0	0.0429997	0.177922	0.248047	0.248047	0.260157	0.350791	0.459721	0.496094	0.55465	0.744141	0.894346	1.02272	1.24023	1.33577	1.60478	2.23242	3.3738
0	0	0.04772	0.179386	0.248047	0.248047	0.261325	0.350791	0.460237	0.496094	0.55465	0.744141	0.894346	1.02272	1.24023	1.33577	1.60911	2.23242	3.3738
0	0	0.0482118	0.179477	0.248047	0.248047	0.262567	0.350791	0.461533	0.496094	0.55465	0.744141	0.894346	1.02326	1.24023	1.33577	1.61579	2.23242	3.44598
0	0	0.0500854	0.180906	0.248047	0.248047	0.262906	0.350791	0.462138	0.496094	0.55465	0.744141	0.894346	1.02517	1.24023	1.33577	1.61613	2.23242	3.45489
0	0	0.0509074	0.181159	0.248047	0.248047	0.263912	0.350791	0.462271	0.496094	0.55465	0.744141	0.894346	1.02607	1.24023	1.33577	1.61834	2.23242	3.45489
0	0	0.0514823	0.181877	0.248047	0.248047	0.264979	0.350791	0.463431	0.496094	0.55465	0.744141	0.894346	1.02628	1.24023	1.33577	1.61959	2.23242	3.45489
0	0	0.0522211	0.182422	0.248047	0.248047	0.265686	0.350791	0.463704	0.496094	0.55465	0.744141	0.894346	1.02814	1.24023	1.33577	1.62032	2.2414	3.45489
0	0	0.0533387	0.182901	0.248047	0.248047	0.266501	0.350791	0.465515	0.496094	0.55465	0.744141	0.894346	1.03125	1.24023	1.33577	1.63373	2.24616	3.47266
0	0	0.0576714	0.183465	0.248047	0.248047	0.267763	0.350791	0.466007	0.496094	0.55465	0.744141	0.894346	1.03145	1.24023	1.33577	1.63768	2.24616	3.47266
0	0	0.0582072	0.183941	0.248047	0.248047	0.267991	0.350791	0.467011	0.496094	0.55465	0.744141	0.894346	1.03346	1.24023	1.33577	1.63911	2.24616	3.47266
0	0	0.0582253	0.184952	0.248047	0.248047	0.268242	0.350791	0.467362	0.496094	0.559976	0.744141	0.894346	1.03628	1.24023	1.33657	1.64774	2.24616	3.4815
0	0	0.0592404	0.185492	0.248047	0.248047	0.26863	0.350791	0.467817	0.496094	0.560043	0.744141	0.894346	1.03629	1.24023	1.33894	1.65659	2.24616	3.4815
0	0	0.0597808	0.186851	0.248047	0.248047	0.270229	0.350791	0.469003	0.496094	0.56074	0.744141	0.897184	1.03698	1.24023	1.33926	1.65853	2.24621	3.4815
0	0	0.0606906	0.188892	0.248047	0.248047	0.271369	0.350791	0.469363	0.496094	0.562182	0.744141	0.898844	1.03784	1.24023	1.33966	1.65958	2.25602	3.50791
0	0	0.0634492	0.189475	0.248047	0.248047	0.272201	0.350805	0.473755	0.496094	0.562605	0.744141	0.901674	1.04202	1.24023	1.34414	1.66395	2.26223	3.50791
0	0	0.0638913	0.18948	0.248047	0.248047	0.272703	0.35142	0.475971	0.496094	0.563825	0.744141	0.902583	1.04358	1.24023	1.34457	1.66395	2.27012	3.52541
0	0	0.0649345	0.190363	0.248047	0.248047	0.273006	0.351986	0.476284	0.496094	0.56571	0.744141	0.902803	1.04499	1.24023	1.34751	1.66395	2.27383	3.52541
0	0	0.0661984	0.190638	0.248047	0.248047	0.273891	0.352362	0.478368	0.496094	0.56591	0.744141	0.903673	1.04875	1.24023	1.36135	1.66395	2.2743	3.52541
0	0	0.0680413	0.190979	0.248047	0.248047	0.275105	0.353317	0.478557	0.496094	0.566302	0.744141	0.904866	1.04979	1.24023	1.36197	1.66395	2.28688	3.5511
0	0	0.0685244	0.191131	0.248047	0.248047	0.275561	0.355115	0.479281	0.496094	0.567299	0.744141	0.905698	1.05237	1.24023	1.36294	1.66395	2.28688	3.55149
0	0	0.0699976	0.191789	0.248047	0.248047	0.277105	0.355788	0.480997	0.496094	0.568668	0.744141	0.9069	1.05237	1.24023	1.37012	1.66395	2.28688	3.57738
0	0	0.0718357	0.191878	0.248047	0.248047	0.277338	0.35611	0.481505	0.496094	0.568774	0.744141	0.908494	1.05237	1.24023	1.37617	1.66395	2.28688	3.61601
0	0	0.0723398	0.192268	0.248047	0.248047	0.278249	0.356344	0.481882	0.496094	0.570866	0.744141	0.909448	1.05237	1.24023	1.37812	1.66395	2.28688	3.68748
0	0	0.0733858	0.194417	0.248047	0.248047	0.278705	0.356844	0.482398	0.496094	0.572466	0.744141	0.909492	1.05237	1.24023	1.38097	1.66395	2.28688	3.68748
0	0	0.0735778	0.194589	0.248047	0.248047	0.279066	0.356855	0.482904	0.496094	0.574681	0.744141	0.910431	1.05237	1.24023	1.38181	1.66395	2.28688	3.68748
0	0	0.0741633	0.194788	0.248047	0.248047	0.281841	0.35794	0.48325	0.496094	0.57473	0.744141	0.910769	1.05237	1.24023	1.38358	1.66395	2.28688	3.68748
0	0	0.0744154	0.195801	0.248047	0.248047	0.282403	0.358407	0.489074	0.496094	0.574895	0.744141	0.915294	1.05237	1.24023	1.38412	1.66395	2.28695	3.68748
0	0	0.0759183	0.196256	0.248047	0.248047	0.282506	0.358673	0.489251	0.496094	0.576469	0.744141	0.918952	1.05237	1.24023	1.38486	1.66395	2.29561	3.7207
0	0	0.0771059	0.197443	0.248047	0.248047	0.28312	0.359383	0.489447	0.496094	0.576697	0.744141	0.919127	1.05237	1.24023	1.38707	1.66695	2.30236	3.7207
0	0	0.0784919	0.197567	0.248047	0.248047	0.284094	0.361447	0.49062	0.496094	0.576924	0.744141	0.919682	1.05237	1.24023	1.3887	1.67876	2.30638	3.7207
0	0	0.0805348	0.199075	0.248047	0.248047	0.284807	0.36191	0.491632	0.496094	0.580253	0.744141	0.920619	1.05237	1.24023	1.38892	1.68142	2.30806	3.7207
0	0	0.0812453	0.199382	0.248047	0.248047	0.28516	0.362281	0.493933	0.496094	0.584008	0.744141	0.921898	1.05388	1.24023	1.39054	1.68329	2.31974	3.7207
0	0	0.0818226	0.199913	0.248047	0.248047	0.285168	0.362917	0.494189	0.496094	0.585852	0.744141	0.922855	1.05581	1.24023	1.39292	1.68696	2.33039	3.72896
0	0	0.0822907	0.201194	0.248047	0.248047	0.285414	0.363098	0.494194	0.496094	0.586309	0.744141	0.924155	1.05688	1.24023	1.39373	1.68836	2.34007	3.72896
0	0	0.0835024	0.201294	0.248047	0.248047	0.285778	0.36376	0.494708	0.496094	0.586457	0.744141	0.925171	1.0569	1.24023	1.40072	1.68856	2.34007	3.72896
0	0	0.0847871	0.202138	0.248047	0.248047	0.286411	0.365404	0.495141	0.496094	0.586617	0.744141	0.925699	1.05715	1.24023	1.40317	1.70148	2.34007	3.75363
0	0	0.0861867	0.202468	0.248047	0.248047	0.286614	0.365506	0.495197	0.496094	0.588152	0.744141	0.926555	1.05777	1.24023	1.40317	1.70221	2.34007	3.79439
0	0	0.0865129	0.203942	0.248047	0.248047	0.287022	0.367027	0.496094	0.496094	0.589022	0.744141	0.926893	1.06347	1.24023	1.40317	1.70761	2.34007	3.79439
0	0	0.0869164	0.204484	0.248047	0.248047	0.287304	0.367193	0.496094	0.496094	0.591556	0.744141	0.927618	1.0642	1.24023	1.40317	1.70776	2.34007	3.79439
0	0	0.0872584	0.204985	0.248047	0.248047	0.287567	0.3674	0.496094	0.496094	0.591658	0.744141	0.928516	1.06511	1.24023	1.40317	1.71816	2.34007	3.85072
0	0	0.0884636	0.205147	0.248047	0.248047	0.287906	0.368023	0.496094	0.496094	0.597208	0.744141	0.928691	1.06599	1.24023	1.40317	1.72019	2.34007	3.85072
0	0	0.0885101	0.205512	0.248047	0.248047	0.289244	0.3687	0.496094	0.496094	0.598225	0.744141	0.928992	1.06678	1.24023	1.40317	1.72154	2.34007	3.87462
0	0	0.0896109	0.205524	0.248047	0.248047	0.289263	0.368818	0.496094	0.496094	0.599681	0.744141	0.932634	1.06952	1.24023	1.40317	1.72417	2.34007	3.87462
0	0	0.0904123	0.206467	0.248047	0.248047	0.291681	0.369684	0.496094	0.496273	0.6002	0.744141	0.935631	1.06994	1.24023	1.40317	1.72705	2.34007	3.87462
0	0	0.0907941	0.208812	0.248047	0.248047	0.293276	0.37086	0.496094	0.497231	0.602024	0.744141	0.937	1.07093	1.24023	1.40317	1.73633	2.34007	3.87462
0	0	0.0919916	0.20931	0.248047	0.248047	0.294577	0.371081	0.496094	0.497369	0.602619	0.744141	0.93868	1.07195	1.24023	1.40317	1.73633	2.34007	3.88255
0	0	0.0926548	0.209872	0.248047	0.248047	0.296312	0.372278	0.496094	0.497374	0.602689	0.744141	0.940121	1.07626	1.24023	1.40317	1.73633	2.34007	3.89851
0	0	0.093566	0.210842	0.248047	0.248047	0.299155	0.372461	0.496094	0.497656	0.606386	0.744141	0.941433	1.07783	1.24023	1.40419	1.73633	2.34007	3.92197
0	0	0.0935739	0.211008	0.248047	0.248047	0.299304	0.372662	0.496094	0.498604	0.607144	0.744141	0.942976	1.07869	1.24023	1.40538	1.73633	2.34007	3.92197
0	0	0.0942429	0.211877	0.248047	0.248047	0.299399	0.372699	0.496094	0.501697	0.608132	0.744141	0.94369	1.07928	1.24023	1.4149	1.73633	2.34354	3.92197
0	0	0.0947136	0.213141	0.248047	0.248047	0.300462	0.373244	0.496094	0.501754	0.608859	0.744141	0.947486	1.08172	1.24023	1.4174	1.73633	2.35318	3.92197
0	0	0.0979265	0.213413	0.248047	0.248047	0.301286	0.373415	0.496094	0.502894	0.609134	0.744141	0.948626	1.0843	1.24023	1.41749	1.73633	2.35318	3.92197
0	0	0.0985733	0.213567	0.248047	0.248047	0.30167	0.3751	0.496094	0.503352	0.609951	0.744141	0.951156	1.0852	1.24023	1.41864	1.73633	2.35318	4.03791
0	0	0.0990233	0.214062	0.248047	0.248047	0.301968	0.377713	0.496094	0.5048	0.610569	0.744141	0.953583	1.0864	1.24023	1.41873	1.73633	2.35318	4.03791
0	0	0.10375	0.215043	0.248047	0.248047	0.303926	0.37801	0.496094	0.50674	0.611915	0.744141	0.953766	1.08739	1.24023	1.42638	1.73973	2.35318	4.03791
0	0	0.104151	0.215545	0.248047	0.248047	0.305693	0.378385	0.496094	0.508172	0.614992	0.744141	0.954633	1.0877	1.24023	1.43163	1.74598	2.35318	4.06827
0	0	0.104639	0.216472	0.248047	0.248047	0.307151	0.378626	0.496094	0.508436	0.615744	0.744141	0.960401	1.08789	1.24023	1.43185	1.74744	2.35318	4.06827
0	0	0.105198	0.216495	0.248047	0.248047	0.308009	0.378739	0.496094	0.5092	0.617322	0.744141	0.964751	1.0896	1.24023	1.43722	1.74908	2.35318	4.06827
0	0	0.105452	0.216823	0.248047	0.248047	0.308665	0.379316	0.496094	0.509219	0.617577	0.744141	0.967685	1.09292	1.24023	1.43727	1.75396	2.35478	4.06827
0	0	0.105554	0.21687	0.248047	0.248047	0.309317	0.379984	0.496094	0.509429	0.618439	0.744141	0.967844	1.09353	1.24023	1.43841	1.75396	2.3629	4.12832
0	0	0.105626	0.216904	0.248047	0.248047	0.309936	0.381001	0.496094	0.5104	0.620202	0.744141	0.96859	1.09547	1.24023	1.43843	1.75396	2.37479	4.15802
0	0	0.106014	0.21786	0.248047	0.248047	0.31105	0.382357	0.496094	0.510645	0.620652	0.744141	0.971689	1.09659	1.24023	1.4407	1.75396	2.38278	4.2168
0	0	0.106236	0.219301	0.248047	0.248047	0.311413	0.382873	0.496094	0.510755	0.621887	0.744141	0.972684	1.0972	1.24023	1.44315	1.75396	2.38733	4.23863
0	0	0.10777	0.219361	0.248047	0.248047	0.313108	0.383571	0.496094	0.510833	0.622644	0.744141	0.972963	1.09893	1.24023	1.44604	1.75396	2.38851	4.26756
0	0	0.108126	0.219467	0.248047	0.248047	0.313189	0.385317	0.496094	0.511417	0.623137	0.744141	0.973696	1.10084	1.24023	1.44635	1.75396	2.39176	4.26756
0	0	0.108289	0.219646	0.248047	0.248047	0.313296	0.385705	0.496094	0.512475	0.624536	0.744141	0.974273	1.10689	1.24023	1.44635	1.75396	2.39873	4.26756
0	0	0.108791	0.219765	0.248047	0.248047	0.313971	0.386778	0.496094	0.512963	0.627674	0.744141	0.975382	1.10753	1.24023	1.44635	1.75396	2.41486	4.26756
0	0	0.109242	0.219905	0.248047	0.248047	0.316659	0.386854	0.496094	0.512977	0.631381	0.744141	0.977042	1.1093	1.24023	1.44635	1.75396	2.4159	4.26756
0	0	0.109815	0.219989	0.248047	0.248047	0.317705	0.387041	0.496094	0.515105	0.632276	0.744141	0.979343	1.1093	1.24023	1.44635	1.75396	2.42976	4.26756
0	0	0.110086	0.220156	0.248047	0.248047	0.317856	0.3881	0.496094	0.516481	0.632625	0.744141	0.979837	1.1093	1.24023	1.44635	1.75396	2.44298	4.33195
0	0	0.11068	0.220266	0.248047	0.248047	0.318862	0.388695	0.496094	0.517791	0.633138	0.744141	0.980396	1.1093	1.24023	1.44635	1.75396	2.44298	4.33195
0	0	0.111715	0.220287	0.248047	0.248047	0.319145	0.388775	0.496094	0.523761	0.634526	0.744141	0.980475	1.1093	1.24023	1.44635	1.75396	2.44298	4.3884
0	0	0.112738	0.220505	0.248047	0.248047	0.319153	0.389703	0.496094	0.52623	0.634969	0.744141	0.981938	1.1093	1.24023	1.44635	1.75396	2.44298	4.3884
0	0	0.112761	0.221349	0.248047	0.248047	0.319484	0.390613	0.496094	0.527016	0.635136	0.744141	0.98563	1.1093	1.24023	1.44635	1.75396	2.44298	4.41635
0	0	0.113204	0.222058	0.248047	0.248047	0.319505	0.390639	0.496094	0.528832	0.636086	0.744141	0.985642	1.1093	1.24023	1.44635	1.75396	2.44298	4.52643
0	0	0.11363	0.222235	0.248047	0.248047	0.320108	0.391561	0.496094	0.531883	0.637907	0.744141	0.985869	1.1093	1.24197	1.44635	1.75396	2.44298	4.56029
0	0	0.114091	0.222925	0.248047	0.248047	0.321073	0.392827	0.496094	0.532804	0.6403	0.744141	0.987613	1.1093	1.24367	1.44635	1.75396	2.44298	4.57376
0	0	0.114143	0.223415	0.248047	0.248047	0.3216	0.393346	0.496094	0.533358	0.643525	0.744141	0.990336	1.1093	1.24386	1.44635	1.75396	2.44349	4.61394
0	0	0.114328	0.223926	0.248047	0.248047	0.322088	0.393593	0.496094	0.534772	0.644479	0.744141	0.991378	1.1093	1.24472	1.44635	1.75396	2.44726	4.61394
0	0	0.114368	0.224655	0.248047	0.248047	0.325562	0.394919	0.496094	0.535838	0.644958	0.744141	0.992188	1.1093	1.24886	1.44635	1.75396	2.45554	4.66038
0	0	0.116197	0.225353	0.248047	0.248047	0.326607	0.395695	0.496094	0.539001	0.644998	0.744141	0.992188	1.1093	1.25107	1.44635	1.75396	2.45554	4.68014
0	0	0.116214	0.22703	0.248047	0.248047	0.326609	0.396429	0.496094	0.539277	0.646204	0.744141	0.992188	1.1093	1.25201	1.44635	1.75396	2.45554	4.68014
0	0	0.116697	0.227103	0.248047	0.248047	0.326676	0.397004	0.496094	0.541111	0.646321	0.744141	0.992188	1.1093	1.26295	1.44635	1.75396	2.48047	4.71289
0	0	0.117122	0.227865	0.248047	0.248047	0.326962	0.399153	0.496094	0.542284	0.64775	0.744141	0.992188	1.1093	1.26299	1.44635	1.75396	2.48047	4.73893
0	0	0.11732	0.22813	0.248047	0.248047	0.327228	0.399626	0.496094	0.544143	0.648491	0.744141	0.992188	1.1093	1.26415	1.44635	1.75396	2.48047	4.73893
0	0	0.117589	0.228738	0.248047	0.248047	0.328685	0.400537	0.496094	0.544167	0.648541	0.744678	0.992188	1.1093	1.26425	1.44635	1.75396	2.48047	4.76482
0	0	0.11786	0.230164	0.248047	0.248047	0.329052	0.401029	0.496094	0.544248	0.650118	0.746356	0.992188	1.1093	1.2648	1.44635	1.75396	2.48047	4.79058
0	0	0.117872	0.230304	0.248047	0.248047	0.329283	0.401327	0.496094	0.545699	0.650165	0.74962	0.992188	1.1093	1.2648	1.44635	1.75396	2.48047	4.87335
0	0	0.118841	0.230594	0.248047	0.248047	0.332094	0.40194	0.496094	0.545804	0.650825	0.750259	0.992188	1.1093	1.2648	1.44635	1.75396	2.48047	4.88596
0	0	0.119212	0.230762	0.248047	0.248047	0.332285	0.402832	0.496094	0.546501	0.654393	0.751484	0.992188	1.1093	1.2648	1.44635	1.75396	2.48047	4.89225
0	0	0.119217	0.230842	0.248047	0.248047	0.332717	0.405044	0.496094	0.546885	0.65476	0.752895	0.992188	1.1093	1.2648	1.44635	1.75396	2.48047	4.92359
0	0	0.119275	0.230953	0.248047	0.248047	0.332915	0.405428	0.496094	0.547193	0.655228	0.753319	0.992188	1.1093	1.2648	1.44635	1.75396	2.48047	4.96713
0	0	0.119806	0.232118	0.248047	0.248047	0.332928	0.406148	0.496094	0.547225	0.655272	0.753579	0.992188	1.1093	1.2648	1.44635	1.75396	2.48047	4.99185
0	0	0.119821	0.232422	0.248047	0.248047	0.334644	0.406279	0.496094	0.547349	0.655925	0.753595	0.992188	1.1093	1.2648	1.44635	1.75396	2.48047	4.99185
0	0	0.120211	0.23405	0.248047	0.248047	0.335783	0.406755	0.496094	0.547702	0.656068	0.754178	0.992188	1.1116	1.2648	1.44635	1.75396	2.48047	5.1076
0	0	0.120608	0.234596	0.248047	0.248047	0.33593	0.407039	0.496094	0.548428	0.657823	0.7555	0.992188	1.11195	1.2648	1.44635	1.75396	2.48047	5.11362
0	0	0.121392	0.235859	0.248047	0.248047	0.337046	0.408931	0.496094	0.549466	0.659053	0.757152	0.992188	1.11289	1.2648	1.44635	1.75396	2.48047	5.11362
0	0	0.122356	0.23658	0.248047	0.248047	0.337778	0.409433	0.496094	0.550546	0.660057	0.757239	0.992188	1.11394	1.2648	1.44635	1.75396	2.48047	5.25602
0	0	0.122963	0.237102	0.248047	0.248047	0.338201	0.41168	0.496094	0.550605	0.661206	0.757485	0.992188	1.11556	1.2648	1.44635	1.75396	2.48047	5.36184
0	0	0.123209	0.237654	0.248047	0.248047	0.338348	0.412769	0.496094	0.551239	0.662088	0.763388	0.992188	1.11608	1.2648	1.44635	1.75396	2.48047	5.46267
0	0	0.123616	0.237894	0.248047	0.248047	0.338863	0.413007	0.496094	0.551326	0.663209	0.763521	0.992188	1.11617	1.2648	1.44635	1.75396	2.48187	5.5465
0	0	0.123731	0.238227	0.248047	0.248047	0.341373	0.41302	0.496094	0.552044	0.663243	0.764113	0.992188	1.11971	1.2648	1.44635	1.75396	2.48357	5.57416
0	0	0.124357	0.238239	0.248047	0.248047	0.343221	0.415292	0.496094	0.553839	0.663552	0.766506	0.992188	1.12737	1.2648	1.44635	1.75396	2.48666	5.81192
0	0	0.124539	0.23924	0.248047	0.248047	0.343367	0.415625	0.496094	0.55465	0.663924	0.766535	0.992188	1.12747	1.2648	1.44635	1.75396	2.48698	6.00458
0	0	0.125171	0.239515	0.248047	0.248047	0.343931	0.41625	0.496094	0.55465	0.666156	0.766622	0.992188	1.12757	1.2648	1.44635	1.75396	2.4905	6.10115
0	0	0.126081	0.239648	0.248047	0.248047	0.344475	0.416829	0.496094	0.55465	0.668075	0.770035	0.992188	1.13258	1.2648	1.44635	1.75396	2.49138	6.20117
0	0	0.126433	0.239935	0.248047	0.248047	0.346335	0.4173	0.496094	0.55465	0.673456	0.772743	0.992188	1.13583	1.2648	1.44635	1.75396	2.49284	6.20117
0	0	0.126603	0.240095	0.248047	0.248047	0.347058	0.417588	0.496094	0.55465	0.675354	0.775028	0.992188	1.13773	1.2648	1.44635	1.75396	2.49284	6.22098
0	0	0.12693	0.241444	0.248047	0.248047	0.347069	0.417749	0.496094	0.55465	0.681116	0.77522	0.992188	1.13954	1.2648	1.44635	1.75396	2.49284	6.39966
0	0	0.127445	0.241899	0.248047	0.248047	0.347165	0.417825	0.496094	0.55465	0.683144	0.775285	0.992188	1.1402	1.2648	1.44635	1.75396	2.49284	6.46827
0	0	0.129068	0.241993	0.248047	0.248047	0.349566	0.419235	0.496094	0.55465	0.683167	0.777819	0.992188	1.14086	1.2648	1.44635	1.75396	2.49284	6.6558
0	0	0.129773	0.242403	0.248047	0.248047	0.350373	0.419545	0.496094	0.55465	0.683202	0.783909	0.992188	1.14185	1.2648	1.44635	1.75396	2.49301	6.67426
0	0	0.130499	0.242473	0.248047	0.248047	0.350791	0.41965	0.496094	0.55465	0.684108	0.784393	0.992188	1.142	1.2648	1.44635	1.7564	2.50849	6.86064
0	0	0.13121	0.242918	0.248047	0.248047	0.350791	0.419731	0.496094	0.55465	0.684587	0.784393	0.992188	1.14273	1.2648	1.44635	1.75804	2.51249	6.89195
0	0	0.131215	0.243474	0.248047	0.248047	0.350791	0.420205	0.496094	0.55465	0.686418	0.784393	0.992188	1.143	1.2648	1.44635	1.76602	2.51285	6.98947
0	0	0.13201	0.244267	0.248047	0.248047	0.350791	0.420821	0.496094	0.55465	0.688965	0.784393	0.992188	1.14378	1.2648	1.44864	1.77076	2.52959	7.10298
0	0	0.132049	0.244465	0.248047	0.248047	0.350791	0.421252	0.496094	0.55465	0.691501	0.784393	0.992188	1.15163	1.2648	1.45095	1.7757	2.52959	7.15477
0	0	0.132921	0.245466	0.248047	0.248047	0.350791	0.421746	0.496094	0.55465	0.692549	0.784393	0.992188	1.15425	1.2648	1.46216	1.78869	2.52959	7.15477
0	0	0.133352	0.24549	0.248047	0.248047	0.350791	0.422022	0.496094	0.55465	0.694944	0.784393	0.992188	1.15447	1.2648	1.47015	1.78869	2.52959	7.23175
0	0	0.133644	0.246002	0.248047	0.248047	0.350791	0.422729	0.496094	0.55465	0.695235	0.784393	0.992188	1.15736	1.2648	1.47069	1.78869	2.52959	7.32474
0	0	0.133841	0.246219	0.248047	0.248047	0.350791	0.425668	0.496094	0.55465	0.695344	0.784393	0.992188	1.15792	1.2648	1.47259	1.78869	2.52959	7.37496
0	0	0.135501	0.24665	0.248047	0.248047	0.350791	0.426595	0.496094	0.55465	0.695975	0.784393	0.992188	1.15839	1.2648	1.47272	1.78869	2.52959	7.39995
0	0	0.135662	0.247588	0.248047	0.248047	0.350791	0.428514	0.496094	0.55465	0.697422	0.784393	0.992188	1.16297	1.2648	1.47371	1.78869	2.53031	7.44141
0	0	0.135674	0.248047	0.248047	0.248047	0.350791	0.429099	0.496094	0.55465	0.699404	0.784393	0.992188	1.16503	1.2648	1.47996	1.78869	2.53274	7.49906
0	0	0.137701	0.248047	0.248047	0.248047	0.350791	0.429462	0.496094	0.55465	0.699902	0.784393	0.992188	1.16505	1.2648	1.48214	1.78869	2.53407	7.66559
0	0	0.137835	0.248047	0.248047	0.248047	0.350791	0.431324	0.496094	0.55465	0.701065	0.784393	0.992188	1.16591	1.2648	1.48522	1.79222	2.53525	7.70145
0	0	0.137845	0.248047	0.248047	0.248047	0.350791	0.432021	0.496094	0.55465	0.701299	0.784393	0.992188	1.16732	1.2648	1.48828	1.7953	2.53836	7.78883
0	0	0.13802	0.248047	0.248047	0.248047	0.350791	0.4328	0.496094	0.55465	0.701583	0.784393	0.992188	1.17108	1.2648	1.48828	1.80581	2.53974	7.78883
0	0	0.138036	0.248047	0.248047	0.248047	0.350791	0.433553	0.496094	0.55465	0.701583	0.784393	0.992188	1.1711	1.2648	1.48828	1.80581	2.54361	8.09865
0	0	0.138244	0.248047	0.248047	0.248047	0.350791	0.433707	0.496094	0.55465	0.701583	0.784393	0.992188	1.17289	1.2648	1.48828	1.80581	2.54385	8.12519
0	0	0.139526	0.248047	0.248047	0.248047	0.350791	0.433733	0.496094	0.55465	0.701583	0.784393	0.992188	1.17357	1.2648	1.48828	1.80581	2.54535	8.43359
0	0	0.139929	0.248047	0.248047	0.248047	0.350791	0.433884	0.496094	0.55465	0.701583	0.784393	0.992188	1.17383	1.2648	1.48828	1.80581	2.5538	8.43724
0	0	0.140211	0.248047	0.248047	0.248047	0.350791	0.4343	0.496094	0.55465	0.701583	0.784393	0.992188	1.1753	1.2648	1.48828	1.80581	2.5538	8.73815
0	0	0.140756	0.248047	0.248047	0.248047	0.350791	0.434585	0.496094	0.55465	0.701583	0.784393	0.992188	1.17573	1.2648	1.48828	1.80581	2.5538	8.88133
0	0	0.143123	0.248047	0.248047	0.248047	0.350791	0.434628	0.496094	0.55465	0.701583	0.784393	0.992188	1.17667	1.2648	1.48828	1.8079	2.5538	8.90554
0	0	0.143181	0.248047	0.248047	0.248047	0.350791	0.435271	0.496094	0.55465	0.701583	0.784393	0.992188	1.17675	1.2648	1.48828	1.81026	2.5538	8.96407
0	0	0.143357	0.248047	0.248047	0.248047	0.350791	0.435778	0.496094	0.55465	0.701583	0.784393	0.992188	1.18251	1.2648	1.48828	1.81446	2.5538	9.01882
0	0	0.14336	0.248047	0.248047	0.248047	0.350791	0.436282	0.496094	0.55465	0.701583	0.784393	0.992188	1.1828	1.2648	1.48828	1.82452	2.5538	9.02904
0	0	0.144196	0.248047	0.248047	0.248047	0.350791	0.437996	0.496094	0.55465	0.701583	0.784393	0.992188	1.18439	1.2648	1.48828	1.83202	2.5538	9.68654
0	0	0.144385	0.248047	0.248047	0.248047	0.350791	0.438164	0.496094	0.55465	0.701583	0.784393	0.992188	1.18513	1.2648	1.48828	1.83244	2.5538	9.76246
0	0	0.144413	0.248047	0.248047	0.248047	0.350791	0.438261	0.496094	0.55465	0.701583	0.784393	0.992188	1.18557	1.2648	1.48828	1.83414	2.5538	9.84718
0	0	0.144513	0.248047	0.248047	0.248047	0.350791	0.439249	0.496094	0.55465	0.701583	0.784393	0.992188	1.18761	1.2648	1.48828	1.84545	2.5538	10.2062
0	0	0.144785	0.248047	0.248047	0.248047	0.350791	0.439312	0.496094	0.55465	0.701583	0.784393	0.992188	1.18799	1.2648	1.48828	1.86115	2.5538	10.3171
0	0	0.145238	0.248047	0.248047	0.248047	0.350791	0.439759	0.496094	0.55465	0.701583	0.784393	0.992188	1.18801	1.2648	1.48828	1.86196	2.5538	10.3171
0	0	0.145975	0.248047	0.248047	0.248047	0.350791	0.439876	0.496094	0.55465	0.701583	0.784393	0.992188	1.19231	1.2648	1.48828	1.86284	2.5538	10.5966
0	0	0.14607	0.248047	0.248047	0.248047	0.350791	0.441188	0.496094	0.55465	0.701583	0.784393	0.992188	1.19436	1.2648	1.48828	1.86715	2.5538	10.6545
0	0	0.146256	0.248047	0.248047	0.248047	0.350791	0.441729	0.496094	0.55465	0.701583	0.784393	0.992188	1.19457	1.2648	1.48828	1.87303	2.5538	10.7693
0	0	0.147266	0.248047	0.248047	0.248047	0.350791	0.442937	0.496094	0.55465	0.701583	0.786533	0.992188	1.19555	1.2648	1.48828	1.87461	2.5538	10.8349
0	0	0.147479	0.248047	0.248047	0.248047	0.350791	0.443261	0.496094	0.55465	0.701583	0.788289	0.992188	1.19566	1.2648	1.48828	1.88142	2.5538	11.1924
0	0	0.147697	0.248047	0.248047	0.248047	0.350791	0.443401	0.496094	0.55465	0.701615	0.789192	0.992188	1.19784	1.2648	1.48828	1.88216	2.56276	11.5308
0	0	0.148084	0.248047	0.248047	0.248047	0.350791	0.445166	0.496094	0.55465	0.701886	0.790645	0.992188	1.19994	1.2648	1.48828	1.88406	2.56539	11.6608
0	0	0.148431	0.248047	0.248047	0.248047	0.350791	0.445336	0.496094	0.55465	0.702337	0.790674	0.992188	1.20432	1.2648	1.48828	1.88907	2.58969	11.6767
0	0	0.149021	0.248047	0.248047	0.248047	0.350791	0.446122	0.496094	0.55465	0.704151	0.791706	0.992188	1.20482	1.2648	1.48828	1.88907	2.58969	11.7528
0	0	0.14909	0.248047	0.248047	0.248047	0.350791	0.446154	0.496094	0.55465	0.704619	0.792838	0.992188	1.20579	1.2648	1.48828	1.88907	2.58969	11.87
0	0	0.149194	0.248047	0.248047	0.248047	0.350791	0.447886	0.496094	0.55465	0.705078	0.793649	0.992188	1.20608	1.2648	1.48828	1.88907	2.58969	12.0322
0	0	0.14963	0.248047	0.248047	0.248047	0.350791	0.449116	0.496094	0.55465	0.70733	0.799773	0.992188	1.20635	1.2648	1.48828	1.88907	2.58969	12.0705
0	0	0.149724	0.248047	0.248047	0.248047	0.350791	0.450346	0.496094	0.55465	0.709274	0.800881	0.992188	1.20683	1.2648	1.49348	1.88907	2.58969	12.442
0	0	0.149841	0.248047	0.248047	0.248047	0.350791	0.451152	0.496094	0.55465	0.710297	0.800917	0.992188	1.20861	1.26529	1.4959	1.88907	2.58969	12.4642
0	0	0.150111	0.248047	0.248047	0.248047	0.350791	0.452063	0.496094	0.55465	0.711358	0.801541	0.992423	1.20986	1.2665	1.50881	1.88907	2.59081	12.5527
0	0	0.150947	0.248047	0.248047	0.248047	0.350791	0.45287	0.496094	0.55465	0.714476	0.80218	0.994481	1.21087	1.27298	1.50881	1.88907	2.5938	12.6309
0	0	0.15101	0.248047	0.248047	0.248047	0.350791	0.453646	0.496094	0.55465	0.714775	0.80485	0.994931	1.21228	1.27819	1.50881	1.88907	2.62201	12.6407
0	0	0.152349	0.248047	0.248047	0.248047	0.350791	0.453866	0.496094	0.55465	0.715948	0.805099	0.997206	1.21566	1.27903	1.50881	1.88907	2.63169	12.9365
0	0	0.152827	0.248047	0.248047	0.248047	0.350791	0.454277	0.496094	0.55465	0.716021	0.806345	0.998257	1.21599	1.28061	1.50881	1.88907	2.63677	12.9982
0	0	0.153294	0.248047	0.248047	0.248047	0.350791	0.45446	0.496094	0.55465	0.71631	0.810544	0.999622	1.2194	1.28397	1.50881	1.88907	2.63677	13.0219
0	0	0.154611	0.248047	0.248047	0.248047	0.350791	0.454774	0.496094	0.55465	0.718948	0.812436	1.001	1.21971	1.28447	1.50881	1.88907	2.63677	13.1348
0	0	0.154757	0.248047	0.248047	0.248047	0.350791	0.454827	0.496094	0.55465	0.718999	0.812447	1.00277	1.22159	1.28667	1.50881	1.88907	2.63677	13.3508
0	0	0.156311	0.248047	0.248047	0.248047	0.350791	0.455479	0.496094	0.55465	0.721108	0.813599	1.0031	1.22252	1.28793	1.50881	1.89023	2.64746	13.7772
0	0	0.156495	0.248047	0.248047	0.248047	0.350791	0.455928	0.496094	0.55465	0.721825	0.813689	1.00336	1.22602	1.29041	1.50881	1.89355	2.66861	13.8196
0	0	0.156543	0.248047	0.248047	0.248047	0.350791	0.457303	0.496094	0.55465	0.721946	0.81646	1.00375	1.23039	1.29527	1.50881	1.90698	2.67155	13.8906
0	0	0.156995	0.248047	0.248047	0.248047	0.350791	0.457645	0.496094	0.55465	0.722328	0.816843	1.00384	1.23095	1.2966	1.51224	1.90914	2.67155	13.9459
0	0	0.157046	0.248047	0.248047	0.248047	0.350791	0.458015	0.496094	0.55465	0.723765	0.821503	1.00896	1.23123	1.2979	1.51364	1.91198	2.67155	14.0885
0	0	0.157579	0.248047	0.248047	0.248732	0.350791	0.458439	0.496094	0.55465	0.725077	0.824078	1.01348	1.23442	1.29939	1.51772	1.91909	2.67155	14.1016
0	0	0.157687	0.248047	0.248047	0.249229	0.350791	0.461719	0.496094	0.55465	0.725241	0.824639	1.01404	1.23583	1.30491	1.51836	1.92925	2.67206	14.2794
0	0	0.15794	0.248047	0.248047	0.249633	0.350791	0.462534	0.496094	0.55465	0.726831	0.824861	1.01535	1.23696	1.3071	1.5193	1.93731	2.68304	14.6872
0	0	0.158051	0.248047	0.248047	0.252745	0.350791	0.463287	0.496094	0.555972	0.727072	0.82529	1.01548	1.24023	1.30884	1.52513	1.93731	2.68304	14.8683
0	0	0.158188	0.248047	0.248047	0.252775	0.350791	0.463827	0.496094	0.55638	0.731177	0.826583	1.01706	1.24023	1.30973	1.52632	1.93731	2.68304	14.8911
0	0	0.158232	0.248047	0.248047	0.253355	0.350791	0.464822	0.496094	0.556386	0.731685	0.82704	1.0187	1.24023	1.32228	1.52704	1.93731	2.68304	14.9344
0	0	0.158841	0.248047	0.248047	0.253554	0.350791	0.467195	0.496094	0.557747	0.732138	0.827223	1.01881	1.24023	1.32352	1.52881	1.93731	2.68304	15.139
0	0	0.158895	0.248047	0.248047	0.253565	0.350791	0.470059	0.496094	0.558539	0.732747	0.828527	1.019	1.24023	1.32389	1.5291	1.93731	2.68304	15.1451
0	0	0.158935	0.248047	0.248047	0.253571	0.350791	0.470974	0.496094	0.559052	0.733978	0.831209	1.02186	1.24023	1.32697	1.52912	1.93731	2.68304	15.7583
0	0	0.159335	0.248047	0.248047	0.255955	0.350891	0.472618	0.496094	0.559066	0.73474	0.832408	1.02272	1.24023	1.32831	1.52988	1.93731	2.68304	15.7856
0	0	0.159857	0.248047	0.248047	0.256331	0.35159	0.478467	0.496094	0.560087	0.736863	0.834653	1.02272	1.24023	1.33019	1.53101	1.93731	2.68304	15.8692
0	0	0.160169	0.248047	0.248047	0.256449	0.351723	0.478849	0.496094	0.561223	0.738372	0.834802	1.02272	1.24023	1.33077	1.53156	1.93731	2.68304	15.9985
0	0	0.160755	0.248047	0.248047	0.256718	0.351976	0.479565	0.496094	0.561386	0.741204	0.835434	1.02272	1.24023	1.33211	1.54678	1.93731	2.68304	16.0944
0	0	0.160808	0.248047	0.248047	0.257975	0.35212	0.480449	0.496094	0.561681	0.742538	0.836234	1.02272	1.24023	1.33224	1.55379	1.93731	2.68847	16.2144
0	0	0.160869	0.248047	0.248047	0.258707	0.352974	0.481859	0.496094	0.562498	0.743351	0.836412	1.02272	1.24023	1.33251	1.55714	1.93731	2.70323	16.3127
0	0	0.161348	0.248047	0.248047	0.258959	0.354478	0.482878	0.496094	0.562949	0.744087	0.83912	1.02272	1.24023	1.33558	1.562	1.93731	2.70871	16.3579
0	0	0.161504	0.248047	0.248047	0.259241	0.355375	0.483382	0.496094	0.563229	0.744141	0.839406	1.02272	1.24023	1.33577	1.5638	1.93731	2.71054	16.5207
0	0	0.161716	0.248047	0.248047	0.26129	0.355915	0.484584	0.496094	0.563634	0.744141	0.841848	1.02272	1.24023	1.33577	1.56408	1.93731	2.71681	16.6487
0	0	0.163191	0.248047	0.248047	0.263258	0.357291	0.484635	0.496094	0.564978	0.744141	0.845396	1.02272	1.24023	1.33577	1.56879	1.93731	2.72463	16.8672
0	0	0.16329	0.248047	0.248047	0.265968	0.358087	0.485226	0.496094	0.566774	0.744141	0.847543	1.02272	1.24023	1.33577	1.56879	1.93731	2.72852	16.869
0	0	0.163597	0.248047	0.248047	0.266483	0.359567	0.488039	0.496094	0.569091	0.744141	0.849461	1.02272	1.24023	1.33577	1.56879	1.93731	2.72852	17.0016
0	0	0.164375	0.248047	0.248047	0.267178	0.361867	0.489039	0.496094	0.570386	0.744141	0.849536	1.02272	1.24023	1.33577	1.56879	1.93731	2.72852	17.1224
0	0	0.164973	0.248047	0.248047	0.267197	0.361966	0.489928	0.496094	0.570692	0.744141	0.849832	1.02272	1.24023	1.33577	1.56879	1.93731	2.72852	17.1655
0	0	0.165758	0.248047	0.248047	0.267776	0.362355	0.492149	0.496094	0.570912	0.744141	0.850757	1.02272	1.24023	1.33577	1.56879	1.94011	2.73129	17.2299
0	0	0.167067	0.248047	0.248047	0.268175	0.363314	0.492879	0.496094	0.57096	0.744141	0.850794	1.02272	1.24023	1.33577	1.56879	1.94441	2.73467	17.5132
0	0	0.168221	0.248047	0.248047	0.270427	0.364368	0.495318	0.496094	0.572108	0.744141	0.850907	1.02272	1.24023	1.33577	1.56879	1.94668	2.73977	17.6549
0	0	0.168846	0.248047	0.248047	0.270641	0.365054	0.496094	0.496094	0.573106	0.744141	0.851394	1.02272	1.24023	1.33577	1.56879	1.95309	2.73977	17.7575
0	0	0.169499	0.248047	0.248047	0.270669	0.365266	0.496094	0.496094	0.573368	0.744141	0.853433	1.02272	1.24023	1.33577	1.56879	1.95722	2.73977	17.9761
0	0	0.169758	0.248047	0.248047	0.270794	0.366878	0.496094	0.496094	0.573463	0.744141	0.853718	1.02272	1.24023	1.33577	1.56879	1.96454	2.73977	18.0041
0	0	0.170011	0.248047	0.248047	0.27132	0.367638	0.496094	0.496094	0.573497	0.744141	0.853814	1.02272	1.24023	1.33577	1.56879	1.97778	2.73977	18.0819
0	0	0.170394	0.248047	0.248047	0.2714	0.369924	0.496094	0.496094	0.573636	0.744141	0.854637	1.02272	1.24023	1.33577	1.56879	1.97865	2.74105	18.1498
0	0	0.171452	0.248047	0.248047	0.272798	0.369998	0.496094	0.496094	0.576614	0.744141	0.856522	1.02272	1.24023	1.33577	1.56879	1.98438	2.74311	18.1781
0	0	0.172832	0.248047	0.248047	0.272976	0.373131	0.496094	0.496094	0.577863	0.744141	0.857796	1.02272	1.24023	1.33577	1.56879	1.98438	2.7596	18.231
0	0	0.173207	0.248047	0.248047	0.273858	0.373574	0.496094	0.496094	0.578435	0.744141	0.857934	1.02272	1.24023	1.33577	1.57007	1.98438	2.76269	18.3118
0	0	0.173234	0.248047	0.248047	0.274793	0.374853	0.496094	0.496094	0.578457	0.744141	0.85873	1.02272	1.24023	1.33577	1.57479	1.98438	2.77325	18.3274
0	0	0.17369	0.248047	0.248047	0.2767	0.376331	0.496094	0.497569	0.578469	0.744141	0.863595	1.02272	1.24023	1.33577	1.57824	1.98438	2.77325	18.5222
0	0	0.173743	0.248047	0.248047	0.2769	0.376621	0.496094	0.49769	0.582523	0.744141	0.865415	1.02272	1.24023	1.33577	1.57937	1.98438	2.77325	18.5306
0	0	0.17406	0.248047	0.248047	0.277898	0.377102	0.496094	0.497735	0.582604	0.744141	0.865725	1.02272	1.24023	1.33577	1.58524	1.98438	2.77325	18.7682
0	0	0.174278	0.248047	0.248047	0.278579	0.37728	0.496094	0.498515	0.583319	0.744141	0.866641	1.02272	1.24023	1.33577	1.58587	1.98438	2.77325	18.9314
0	0	0.174476	0.248047	0.248047	0.278664	0.377485	0.496094	0.498556	0.583576	0.744141	0.867149	1.02272	1.24023	1.33577	1.58816	1.98438	2.77325	18.9719
0	0	0.174553	0.248047	0.248047	0.279012	0.37835	0.496094	0.498798	0.584875	0.744141	0.868773	1.02272	1.24023	1.33577	1.58827	1.98438	2.77325	19.362
0	0	0.174826	0.248047	0.248047	0.28219	0.378415	0.496094	0.49967	0.587003	0.744141	0.870918	1.02272	1.24023	1.33577	1.58827	1.98438	2.77325	19.4048
0	0	0.175514	0.248047	0.248047	0.285532	0.378941	0.496094	0.502811	0.590416	0.744141	0.871732	1.02272	1.24023	1.33577	1.58827	1.98438	2.77325	19.408
0	0	0.1756	0.248047	0.248047	0.285574	0.37936	0.496094	0.504885	0.590712	0.744141	0.875733	1.02272	1.24023	1.33577	1.58827	1.98438	2.77325	19.8577
0	0	0.175632	0.248047	0.248047	0.286455	0.380097	0.496094	0.505228	0.593001	0.744141	0.876465	1.02619	1.24023	1.33577	1.58827	1.98539	2.77325	19.9751
0	0	0.175755	0.248047	0.248047	0.2869	0.380166	0.496094	0.505325	0.593027	0.744141	0.87907	1.02866	1.24023	1.33577	1.58827	1.98663	2.77325	20.0059
0	0	0.175796	0.248047	0.248047	0.286984	0.381631	0.496094	0.505349	0.593087	0.744141	0.881725	1.03093	1.24023	1.33577	1.58827	1.98703	2.77325	20.1163
0	0	0.176165	0.248047	0.248047	0.287663	0.381641	0.496094	0.50574	0.593606	0.744141	0.883105	1.03502	1.24023	1.33577	1.58827	1.98928	2.77325	20.4935
0	0	0.176252	0.248047	0.248047	0.288063	0.382099	0.496094	0.505767	0.594927	0.744141	0.883901	1.03548	1.24023	1.33577	1.58827	1.99982	2.77325	20.9801
0	0	0.176567	0.248047	0.248047	0.288237	0.384435	0.496094	0.505935	0.595418	0.744141	0.885691	1.03934	1.24023	1.33577	1.58827	1.99982	2.77325	21.0138
0	0	0.176804	0.248047	0.248047	0.289443	0.385139	0.496094	0.506327	0.596641	0.744141	0.890046	1.04147	1.24023	1.33577	1.58827	1.99982	2.77325	21.6981
0	0	0.177356	0.248047	0.248047	0.289896	0.385544	0.496094	0.50704	0.598047	0.744141	0.891061	1.04275	1.24023	1.33577	1.58827	1.99982	2.77325	21.9083
0	0	0.177663	0.248047	0.248047	0.29053	0.385846	0.496094	0.507557	0.599159	0.744141	0.892891	1.04615	1.24023	1.33577	1.58827	1.99982	2.77325	22.7731
0	0	0.177866	0.248047	0.248047	0.290556	0.385888	0.496094	0.50801	0.600099	0.744141	0.892957	1.04666	1.24023	1.33577	1.58827	1.99982	2.77325	23.5056
0	0	0.178169	0.248047	0.248047	0.290606	0.386634	0.496094	0.510379	0.600905	0.744141	0.894346	1.04703	1.24023	1.33577	1.58827	1.99982	2.77325	24.2186
0	0	0.17856	0.248047	0.248047	0.291374	0.387513	0.496094	0.511525	0.601342	0.744141	0.894346	1.04774	1.24023	1.33577	1.58827	1.99982	2.77325	24.2959
0	0	0.17869	0.248047	0.248047	0.292034	0.389054	0.496094	0.512434	0.601368	0.744141	0.894346	1.05109	1.24023	1.33577	1.58827	1.99982	2.77325	24.5165
0	0	0.178812	0.248047	0.248047	0.292208	0.389216	0.496094	0.512594	0.602486	0.744141	0.894346	1.05198	1.24023	1.33577	1.58827	1.99982	2.77325	25.1813
0	0	0.17914	0.248047	0.248047	0.292506	0.389368	0.496094	0.512722	0.604543	0.744141	0.894346	1.05237	1.24023	1.33577	1.58827	1.99982	2.77325	25.3008
0	0	0.180681	0.248047	0.248047	0.293041	0.390321	0.496094	0.513886	0.604668	0.744141	0.894346	1.05237	1.24023	1.33577	1.58827	1.99982	2.77325	25.3214
0	0	0.181272	0.248047	0.248047	0.294257	0.390603	0.496094	0.514432	0.608759	0.744141	0.894346	1.05237	1.24023	1.33577	1.58827	1.99982	2.77325	25.4051
0	0	0.181953	0.248047	0.248047	0.294732	0.391047	0.496094	0.514729	0.610692	0.744141	0.894346	1.05237	1.24023	1.33577	1.58827	1.99982	2.77325	25.433
0	0	0.182088	0.248047	0.248047	0.294877	0.39189	0.496094	0.514969	0.611359	0.744141	0.894346	1.05237	1.24023	1.33577	1.58827	1.99982	2.77325	25.4559
0	0	0.182208	0.248047	0.248047	0.295021	0.39208	0.496094	0.51703	0.611916	0.744141	0.894346	1.05237	1.24023	1.33577	1.58827	1.99982	2.77325	25.6258
0	0.0094266	0.182644	0.248047	0.248047	0.296238	0.392408	0.496094	0.51933	0.614992	0.744141	0.894346	1.05237	1.24023	1.33577	1.58827	1.99982	2.77325	25.8755
0	0.0135322	0.182657	0.248047	0.248047	0.297681	0.392496	0.496094	0.519539	0.61506	0.744141	0.894346	1.05237	1.24023	1.33577	1.58827	1.99982	2.77325	26.2988
0	0.0191225	0.183072	0.248047	0.248047	0.297996	0.394067	0.496094	0.519599	0.617228	0.744141	0.894346	1.05237	1.24023	1.33577	1.58827	1.99982	2.77325	26.3231
0	0.0228203	0.18338	0.248047	0.248047	0.299805	0.394846	0.496094	0.52008	0.617946	0.744141	0.894346	1.05237	1.24023	1.33577	1.58827	1.99982	2.77325	26.5213
0	0.0246445	0.183589	0.248047	0.248047	0.300122	0.394868	0.496094	0.520418	0.618139	0.744141	0.894346	1.05237	1.24023	1.33577	1.58827	1.99982	2.7837	26.7488
0	0.0256105	0.183857	0.248047	0.248047	0.300719	0.395432	0.496094	0.520491	0.618818	0.744141	0.894346	1.05237	1.24023	1.33577	1.58827	1.99982	2.79856	26.8304
0	0.0285443	0.183988	0.248047	0.248047	0.301676	0.395708	0.496094	0.520757	0.619253	0.744141	0.894346	1.05237	1.24023	1.33577	1.58827	1.99982	2.80488	26.9455
0	0.0307023	0.18537	0.248047	0.248047	0.301709	0.396275	0.496094	0.520814	0.619986	0.744141	0.894346	1.05237	1.24023	1.33577	1.58827	2.00491	2.80633	27.0061
0	0.0310567	0.185596	0.248047	0.248047	0.303348	0.396438	0.496094	0.520956	0.622518	0.744141	0.894346	1.05321	1.24023	1.33577	1.58827	2.00703	2.80633	27.0132
0	0.0338745	0.186393	0.248047	0.248047	0.30367	0.397631	0.496094	0.521191	0.622531	0.744141	0.894346	1.05326	1.24023	1.33577	1.58827	2.01715	2.80633	27.0564
0	0.0353521	0.186497	0.248047	0.248047	0.303692	0.397808	0.496094	0.523395	0.623328	0.744141	0.894346	1.0551	1.24023	1.33577	1.58827	2.02383	2.80633	27.0678
0	0.0374842	0.186543	0.248047	0.248047	0.30487	0.398046	0.496094	0.523825	0.623424	0.744141	0.895095	1.06329	1.24023	1.33577	1.58827	2.03114	2.82817	27.3824
0	0.037705	0.186991	0.248047	0.248047	0.305345	0.398158	0.496094	0.526039	0.625093	0.744141	0.895865	1.06395	1.24023	1.33662	1.58827	2.04029	2.82817	27.5421
0	0.0384441	0.187209	0.248047	0.248047	0.305412	0.398167	0.496094	0.526686	0.627571	0.744141	0.896089	1.0642	1.24023	1.33801	1.58827	2.04545	2.82817	27.5645
0	0.0399321	0.187262	0.248047	0.248047	0.305559	0.398412	0.496094	0.52725	0.628355	0.744141	0.896908	1.06541	1.24023	1.33996	1.58827	2.04545	2.82817	27.6239
0	0.0399912	0.187674	0.248047	0.248047	0.30797	0.398536	0.496094	0.528598	0.628567	0.744141	0.900742	1.06559	1.24023	1.34256	1.58827	2.04545	2.82817	27.6848
0	0.0406784	0.188129	0.248047	0.248047	0.307985	0.398678	0.496094	0.529494	0.629438	0.744141	0.902194	1.06595	1.24023	1.34766	1.58827	2.04545	2.82817	27.7547
0	0.0413257	0.188323	0.248047	0.248047	0.308062	0.398914	0.496094	0.530547	0.62965	0.744141	0.90405	1.06617	1.24023	1.3504	1.58827	2.04545	2.83098	27.8807
0	0.0429121	0.188523	0.248047	0.248047	0.308141	0.39939	0.496094	0.530594	0.629989	0.744141	0.904253	1.06778	1.24023	1.3518	1.58827	2.04545	2.83394	27.9149
0	0.0442279	0.188751	0.248047	0.248047	0.308303	0.40032	0.496094	0.530598	0.631165	0.744141	0.908815	1.06794	1.24023	1.35376	1.58827	2.04768	2.86981	28.083
0	0.0445099	0.18883	0.248047	0.248047	0.308556	0.401131	0.496094	0.53137	0.633214	0.744141	0.91109	1.06987	1.24023	1.35546	1.58827	2.05544	2.87198	28.1607
0	0.0451999	0.189002	0.248047	0.248047	0.309089	0.401286	0.496094	0.531798	0.633246	0.744141	0.913559	1.07162	1.24023	1.35924	1.58827	2.05628	2.8927	28.3349
0	0.045417	0.189095	0.248047	0.248047	0.310233	0.402109	0.496094	0.531847	0.635664	0.744141	0.914035	1.07636	1.24023	1.36319	1.58827	2.06646	2.8927	28.338
0	0.04551	0.189254	0.248047	0.248047	0.311043	0.403098	0.496094	0.531887	0.635674	0.744141	0.914362	1.07725	1.24023	1.36687	1.58827	2.08974	2.8927	28.5124
0	0.0469884	0.18926	0.248047	0.248047	0.311189	0.404953	0.496094	0.534483	0.637131	0.744141	0.915277	1.0776	1.24023	1.36946	1.58827	2.09815	2.8927	28.7446
0	0.047593	0.190368	0.248047	0.248047	0.312446	0.406344	0.496094	0.534675	0.641497	0.744141	0.916869	1.07866	1.24023	1.37152	1.58827	2.10453	2.8927	28.7991
0	0.0476137	0.190887	0.248047	0.248047	0.312888	0.406594	0.496094	0.534917	0.643106	0.744141	0.918877	1.07948	1.24023	1.37451	1.58827	2.10475	2.90331	28.8343
0	0.0484989	0.191668	0.248047	0.248047	0.313286	0.406679	0.496094	0.53613	0.644196	0.744141	0.920138	1.08149	1.24023	1.38092	1.58827	2.10475	2.90331	28.9833
0	0.0496605	0.19212	0.248047	0.248047	0.313789	0.407984	0.496094	0.536626	0.644309	0.744141	0.922052	1.0816	1.24023	1.38415	1.58827	2.10475	2.91507	29.2064
0	0.0498568	0.192268	0.248047	0.248047	0.313975	0.40861	0.496094	0.538329	0.64458	0.744141	0.923094	1.08175	1.24023	1.38469	1.58827	2.10475	2.92887	29.2664
0	0.0498866	0.192392	0.248047	0.248047	0.314076	0.409417	0.496094	0.539381	0.645018	0.744141	0.923923	1.08571	1.24023	1.38768	1.58827	2.10475	2.94194	29.2958
0	0.0501552	0.192924	0.248047	0.248047	0.314463	0.409445	0.496094	0.540222	0.6452	0.744141	0.924171	1.0865	1.24023	1.39075	1.58827	2.10475	2.97656	29.4999
0	0.0501989	0.193581	0.248047	0.248047	0.314588	0.409639	0.496094	0.540294	0.645458	0.744141	0.925682	1.08694	1.24023	1.39477	1.58827	2.10475	2.97656	29.5082
0	0.0506356	0.193637	0.248047	0.248047	0.317041	0.411032	0.496094	0.541146	0.645652	0.744141	0.932861	1.08795	1.24023	1.39911	1.58827	2.10766	2.97656	29.6766
0	0.0513307	0.193692	0.248047	0.248047	0.317129	0.411217	0.496094	0.54203	0.646146	0.744141	0.934488	1.08812	1.24023	1.4026	1.58827	2.11931	2.97656	29.7915
0	0.0513607	0.193868	0.248047	0.248047	0.317358	0.412156	0.496094	0.542723	0.647213	0.744141	0.93515	1.09231	1.24023	1.40317	1.58827	2.11931	2.97656	30.5652
0	0.0514057	0.19387	0.248047	0.248047	0.318307	0.413089	0.496094	0.543778	0.64844	0.744141	0.936054	1.09355	1.24023	1.40317	1.58973	2.11931	2.97656	30.5652
0	0.0514069	0.194451	0.248047	0.248047	0.318866	0.413471	0.496094	0.54488	0.649595	0.744141	0.939976	1.09553	1.24023	1.40317	1.60505	2.11931	2.97656	30.8776
0	0.0514582	0.19478	0.248047	0.248047	0.319009	0.413599	0.496094	0.545726	0.650886	0.744141	0.941373	1.09939	1.24023	1.40317	1.62192	2.11931	2.98688	31.0059
0	0.0522635	0.194935	0.248047	0.248047	0.319729	0.413977	0.496094	0.546326	0.651164	0.744141	0.943966	1.10296	1.24023	1.40317	1.6233	2.11931	2.98688	31.0307
0	0.052826	0.194956	0.248047	0.248047	0.319999	0.414215	0.496094	0.548584	0.65118	0.744141	0.943978	1.10364	1.24023	1.40317	1.63198	2.11931	2.98688	31.0802
0	0.0529154	0.195145	0.248047	0.248047	0.32119	0.414788	0.496094	0.548629	0.651369	0.744141	0.944219	1.10682	1.24023	1.40317	1.63549	2.11931	2.98688	31.176
0	0.0536301	0.195511	0.248047	0.248047	0.322406	0.415133	0.496094	0.548911	0.653658	0.744141	0.945027	1.10754	1.24023	1.40317	1.63797	2.11931	2.98688	31.2578
0	0.0536607	0.195552	0.248047	0.248047	0.322897	0.415153	0.496094	0.550953	0.655865	0.744141	0.946028	1.10815	1.24023	1.40317	1.64131	2.11931	2.99716	31.4795
0	0.0567346	0.196091	0.248047	0.248047	0.323985	0.415314	0.496094	0.551374	0.656981	0.744141	0.950982	1.10841	1.24023	1.40317	1.64305	2.11931	2.99716	31.5576
0	0.0571086	0.196332	0.248047	0.248047	0.324265	0.415641	0.496094	0.551699	0.657215	0.744141	0.951084	1.10859	1.24023	1.40317	1.64587	2.11931	2.99716	31.7209
0	0.0588866	0.196475	0.248047	0.248047	0.325067	0.415873	0.496094	0.551949	0.658172	0.744141	0.951854	1.1093	1.24023	1.40317	1.64883	2.12632	2.99716	31.8438
0	0.0595656	0.196627	0.248047	0.248047	0.325678	0.416323	0.496094	0.553856	0.660221	0.744141	0.952276	1.1093	1.24023	1.40317	1.65368	2.12912	2.99716	32.1544
0	0.0603761	0.197576	0.248047	0.248047	0.325817	0.417024	0.496094	0.55465	0.660776	0.744141	0.95251	1.1093	1.24023	1.40317	1.66395	2.13378	2.99716	32.4742
0	0.0610601	0.197745	0.248047	0.248047	0.325837	0.417376	0.496094	0.55465	0.661811	0.744141	0.953115	1.1093	1.24023	1.40317	1.66395	2.13378	3.00749	32.8107
0	0.0619805	0.198073	0.248047	0.248047	0.326437	0.417471	0.496094	0.55465	0.662102	0.744141	0.955609	1.1093	1.24023	1.40317	1.66395	2.13378	3.01822	32.8847
0	0.0623946	0.198911	0.248047	0.248047	0.326696	0.418333	0.496094	0.55465	0.662997	0.744141	0.957369	1.1093	1.24023	1.40583	1.66395	2.13378	3.0278	33.0908
0	0.0626058	0.199232	0.248047	0.248047	0.327144	0.418774	0.496094	0.55465	0.663291	0.744141	0.957663	1.1093	1.24023	1.40733	1.66395	2.13378	3.0278	33.1549
0	0.0635331	0.199238	0.248047	0.248047	0.327496	0.419967	0.496094	0.55465	0.663446	0.744141	0.958033	1.1093	1.24023	1.41434	1.66395	2.13378	3.0278	33.6248
0	0.0635897	0.199277	0.248047	0.248047	0.327683	0.420789	0.496094	0.55465	0.663471	0.744141	0.960401	1.1093	1.24023	1.41632	1.66395	2.13378	3.0278	33.7863
0	0.0644035	0.199869	0.248047	0.248047	0.327697	0.421049	0.496094	0.55465	0.663572	0.744141	0.961377	1.1093	1.24023	1.41818	1.66395	2.13378	3.0278	33.8118
0	0.0655332	0.20113	0.248047	0.248047	0.328118	0.421183	0.496094	0.55465	0.665671	0.744141	0.961618	1.1093	1.24023	1.41911	1.66395	2.13378	3.0278	34.0719
0	0.0656657	0.20127	0.248047	0.248047	0.330066	0.421184	0.496094	0.55465	0.666332	0.744141	0.961774	1.1093	1.24023	1.42078	1.66395	2.13378	3.0278	34.3243
0	0.0662162	0.20165	0.248047	0.248047	0.3308	0.421278	0.496094	0.55465	0.667768	0.746048	0.961971	1.1093	1.24023	1.42129	1.66486	2.13378	3.0278	34.6068
0	0.0668804	0.202022	0.248047	0.248047	0.33096	0.421504	0.496094	0.55465	0.668877	0.747407	0.964753	1.1093	1.24023	1.42195	1.66993	2.13378	3.0278	35.2541
0	0.0669057	0.202066	0.248047	0.248047	0.332549	0.421987	0.496094	0.55465	0.66904	0.747509	0.965618	1.1093	1.24023	1.42328	1.67297	2.13378	3.0278	35.2654
0	0.0687088	0.202397	0.248047	0.248047	0.332777	0.422456	0.496094	0.55465	0.671302	0.748318	0.966247	1.1093	1.24023	1.42574	1.67308	2.13378	3.0278	35.8563
0	0.0692696	0.202871	0.248047	0.248047	0.3332	0.422629	0.496094	0.55465	0.672514	0.749617	0.9667	1.1093	1.24023	1.42613	1.67623	2.13378	3.0278	35.9907
0	0.0695471	0.202882	0.248047	0.248047	0.333531	0.423587	0.496094	0.55465	0.672908	0.751459	0.966994	1.1093	1.24023	1.42939	1.68127	2.13378	3.0278	36.1468
0	0.0704214	0.203395	0.248047	0.248047	0.333831	0.424412	0.496094	0.55465	0.673295	0.751688	0.968172	1.1093	1.24023	1.43155	1.68251	2.13378	3.0278	36.2493
0	0.0711704	0.203608	0.248047	0.248047	0.334636	0.424668	0.496094	0.55465	0.677336	0.753276	0.974749	1.1093	1.24023	1.43212	1.68334	2.13378	3.03255	36.4595
0	0.0713553	0.203734	0.248047	0.248047	0.334698	0.425528	0.496094	0.55465	0.677713	0.753301	0.97541	1.1093	1.24023	1.43324	1.68409	2.13378	3.06817	36.489
0	0.071398	0.203882	0.248047	0.248047	0.334721	0.425775	0.496094	0.55465	0.677938	0.753388	0.977502	1.1093	1.24023	1.43452	1.69385	2.13378	3.06817	36.6858
0	0.0716775	0.204446	0.248047	0.248047	0.335196	0.426141	0.496094	0.55465	0.678292	0.753893	0.979255	1.1093	1.24023	1.435	1.69588	2.13378	3.10802	37.0745
0	0.0718105	0.205656	0.248047	0.248047	0.33549	0.426465	0.496094	0.55465	0.679368	0.75628	0.979619	1.1093	1.24023	1.43595	1.69764	2.13378	3.1165	37.3127
0	0.0733858	0.207266	0.248047	0.248047	0.336161	0.427176	0.496094	0.55465	0.681501	0.756579	0.979837	1.1093	1.24023	1.44047	1.70028	2.13378	3.11664	37.8871
0	0.0740178	0.207365	0.248047	0.248047	0.337363	0.429862	0.496094	0.55465	0.683144	0.756613	0.980072	1.1093	1.24023	1.44176	1.70059	2.13378	3.13757	37.9439
0	0.0741627	0.207516	0.248047	0.248047	0.338044	0.430247	0.496094	0.55465	0.683751	0.756749	0.981099	1.1093	1.24023	1.44223	1.70133	2.13378	3.13757	37.9641
0	0.0745555	0.209013	0.248047	0.248047	0.338581	0.43086	0.496094	0.55465	0.683856	0.75743	0.9812	1.1093	1.24023	1.44233	1.70251	2.14262	3.13757	38.1589
0	0.0747352	0.20963	0.248047	0.248047	0.338651	0.433075	0.496094	0.55465	0.684158	0.757483	0.981316	1.1093	1.24023	1.44635	1.7106	2.14878	3.13811	38.274
0	0.0757893	0.209735	0.248047	0.248047	0.340072	0.433315	0.496094	0.55465	0.686576	0.758105	0.98404	1.1093	1.24023	1.44635	1.71191	2.15544	3.15712	38.3114
0	0.0765904	0.209862	0.248047	0.248047	0.340561	0.43345	0.496094	0.55465	0.686776	0.760098	0.986334	1.1093	1.24023	1.44635	1.7128	2.16296	3.15712	38.4441
0	0.077133	0.209916	0.248047	0.248047	0.340793	0.434928	0.496094	0.55465	0.686876	0.765439	0.986487	1.1093	1.24023	1.44635	1.71332	2.17779	3.15712	38.5048
0	0.077286	0.210044	0.248047	0.248047	0.34113	0.435014	0.496094	0.55465	0.6912	0.766812	0.98706	1.1093	1.24023	1.44635	1.72622	2.19125	3.17655	38.5815
0	0.0790388	0.210212	0.248047	0.248047	0.341287	0.436447	0.496094	0.55465	0.694655	0.767674	0.988839	1.11076	1.24023	1.44635	1.72774	2.20583	3.17655	39.0475
0	0.0792809	0.210354	0.248047	0.248047	0.342577	0.438024	0.496094	0.55465	0.697586	0.769723	0.989407	1.11077	1.24023	1.44635	1.73633	2.21023	3.17655	39.2267
0	0.0795734	0.210425	0.248047	0.248047	0.344633	0.43966	0.496094	0.55465	0.698597	0.76993	0.992188	1.11167	1.24023	1.44635	1.73633	2.2186	3.17655	39.2698
0	0.0797124	0.210532	0.248047	0.248047	0.345127	0.439681	0.496094	0.55465	0.698719	0.770115	0.992188	1.11619	1.24023	1.44635	1.73633	2.2186	3.17655	39.345
0	0.0797466	0.210876	0.248047	0.248047	0.345632	0.439789	0.496094	0.55465	0.699725	0.771923	0.992188	1.11669	1.24023	1.44635	1.73633	2.2186	3.17655	39.5337
0	0.0798651	0.211485	0.248047	0.248047	0.347713	0.439857	0.496094	0.55465	0.700197	0.772463	0.992188	1.11682	1.24023	1.44635	1.73633	2.2186	3.17655	39.6293
0	0.0804353	0.211861	0.248047	0.248047	0.347941	0.440115	0.496094	0.55465	0.700349	0.774009	0.992188	1.1236	1.24023	1.44635	1.73633	2.2186	3.17655	39.7015
0	0.0810263	0.213116	0.248047	0.248047	0.348259	0.441561	0.496094	0.55465	0.701174	0.777853	0.992188	1.12485	1.24023	1.44635	1.73633	2.2186	3.17655	39.7696
0	0.081171	0.213246	0.248047	0.248047	0.348903	0.441697	0.496094	0.55465	0.701583	0.779436	0.992188	1.12508	1.24023	1.44635	1.73633	2.2186	3.22461	39.7943
0	0.081265	0.213436	0.248047	0.248047	0.350571	0.443074	0.496094	0.55465	0.701583	0.781024	0.992188	1.1256	1.24023	1.44635	1.73633	2.2186	3.22461	39.8461
0	0.0815763	0.213621	0.248047	0.248047	0.350651	0.443117	0.496094	0.55465	0.701583	0.784393	0.992188	1.12626	1.24023	1.44635	1.73633	2.2186	3.22461	39.8623
0	0.0816731	0.213787	0.248047	0.248047	0.35074	0.443325	0.496094	0.55465	0.701583	0.784393	0.992188	1.12662	1.24023	1.44635	1.73633	2.2186	3.22461	40.1269
0	0.0820875	0.214395	0.248047	0.248047	0.350791	0.443634	0.496094	0.55465	0.701583	0.784393	0.992188	1.12911	1.24023	1.44635	1.73633	2.23242	3.22461	40.1384
0	0.0821273	0.214595	0.248047	0.248047	0.350791	0.444304	0.496094	0.55465	0.701583	0.784393	0.992188	1.13022	1.24023	1.44635	1.73633	2.23242	3.22461	40.1874
0	0.0821789	0.21485	0.248047	0.248047	0.350791	0.444744	0.496094	0.55465	0.701583	0.784393	0.992188	1.13248	1.24023	1.44635	1.73633	2.23242	3.23414	40.1874
0	0.0822892	0.215211	0.248047	0.248047	0.350791	0.445368	0.496094	0.55465	0.701583	0.784393	0.992188	1.1355	1.24023	1.44635	1.73876	2.23242	3.23414	40.4864
0	0.0823764	0.215313	0.248047	0.248047	0.350791	0.445634	0.496094	0.55465	0.701583	0.784393	0.992188	1.13553	1.24023	1.44635	1.73918	2.23242	3.23414	40.7462
0	0.0829465	0.215333	0.248047	0.248047	0.350791	0.446818	0.496094	0.55465	0.701583	0.784393	0.992188	1.13671	1.24023	1.44635	1.74392	2.23242	3.23414	40.8563
0	0.0836956	0.215453	0.248047	0.248047	0.350791	0.447798	0.496094	0.55465	0.701583	0.784393	0.992188	1.13691	1.24023	1.44635	1.74687	2.23242	3.23414	40.8683
0	0.0841113	0.215547	0.248047	0.248047	0.350791	0.448817	0.496094	0.55465	0.701583	0.784393	0.992188	1.13933	1.24023	1.44635	1.74926	2.23242	3.23774	41.0778
0	0.0841497	0.216744	0.248047	0.248047	0.350791	0.449968	0.496094	0.55465	0.701583	0.784393	0.992188	1.13954	1.24023	1.44635	1.75058	2.23242	3.26255	41.0965
0	0.0841827	0.216858	0.248047	0.248047	0.350791	0.451198	0.496094	0.55465	0.701583	0.784393	0.992188	1.14336	1.24023	1.44635	1.75396	2.23284	3.3279	41.1025
0	0.0849257	0.217036	0.248047	0.248047	0.350791	0.451388	0.496094	0.55465	0.701583	0.784393	0.992188	1.14474	1.24023	1.44635	1.75396	2.2398	3.3279	41.3703
0	0.0851279	0.217302	0.248047	0.248047	0.350791	0.451514	0.496094	0.55465	0.701583	0.784393	0.992188	1.14478	1.24023	1.44635	1.75396	2.24616	3.3279	41.3949
0	0.0851622	0.217509	0.248047	0.248047	0.350791	0.451741	0.496094	0.55465	0.701583	0.784393	0.992188	1.14492	1.24023	1.44635	1.75396	2.24616	3.33276	41.7102
0	0.0856121	0.217554	0.248047	0.248047	0.350791	0.453125	0.496094	0.55465	0.701583	0.784393	0.992188	1.14878	1.24023	1.44635	1.75396	2.24616	3.33713	42.1307
0	0.0858673	0.217791	0.248047	0.248047	0.350791	0.453261	0.496094	0.55465	0.701583	0.784393	0.992188	1.15169	1.24023	1.44635	1.75396	2.24616	3.33713	42.184
0	0.0858991	0.218068	0.248047	0.248047	0.350791	0.453285	0.496094	0.55465	0.701583	0.784393	0.992188	1.15272	1.24023	1.44635	1.75396	2.24616	3.33713	42.4846
0	0.0868272	0.218166	0.248047	0.248047	0.350791	0.453336	0.496094	0.55465	0.701583	0.784393	0.992188	1.15425	1.24285	1.44635	1.75396	2.24616	3.33713	42.4979
0	0.0869203	0.218215	0.248047	0.248047	0.350791	0.45412	0.496094	0.55465	0.701583	0.784393	0.992188	1.15594	1.24557	1.44635	1.75396	2.24616	3.33713	42.7857
0	0.0871139	0.218631	0.248047	0.248047	0.350791	0.454132	0.496094	0.55465	0.701583	0.784393	0.992188	1.15665	1.24764	1.44635	1.75396	2.24616	3.33713	42.8605
0	0.0872838	0.218822	0.248047	0.248047	0.350791	0.454171	0.496094	0.55465	0.701583	0.784393	0.992188	1.15853	1.24949	1.44635	1.75396	2.2488	3.36176	43.0331
0	0.0873551	0.218864	0.248047	0.248047	0.350791	0.455924	0.496094	0.55465	0.701583	0.784393	0.992188	1.16124	1.25123	1.44635	1.75396	2.24883	3.3738	43.1038
0	0.0875627	0.218953	0.248047	0.248047	0.350791	0.457614	0.496094	0.55465	0.701583	0.784393	0.992188	1.16211	1.25203	1.44635	1.75396	2.25391	3.3738	43.1188
0	0.0875877	0.219998	0.248047	0.248047	0.350791	0.457917	0.496094	0.55465	0.701583	0.784393	0.992188	1.16255	1.25308	1.44635	1.75396	2.257	3.3738	43.1438
0	0.0878074	0.220164	0.248047	0.248047	0.350791	0.458335	0.496094	0.55465	0.701583	0.784393	0.992188	1.16338	1.25358	1.44635	1.75396	2.26325	3.3738	43.1758
0	0.0883023	0.220298	0.248047	0.248047	0.350791	0.459978	0.496094	0.55465	0.701583	0.784393	0.992188	1.16415	1.25649	1.44635	1.75396	2.2842	3.38291	43.2321
0	0.0889975	0.220308	0.248047	0.248047	0.350791	0.46033	0.496094	0.55465	0.701583	0.784393	0.992188	1.16571	1.26254	1.44635	1.75396	2.28688	3.43091	43.2556
0	0.0893693	0.220351	0.248047	0.248047	0.350791	0.460374	0.496094	0.55465	0.701583	0.784393	0.992188	1.16671	1.2648	1.44635	1.75396	2.28688	3.44598	43.4696
0	0.0896484	0.220464	0.248047	0.248047	0.350791	0.461343	0.496094	0.55465	0.701583	0.784393	0.992188	1.16733	1.2648	1.44635	1.75396	2.28688	3.45489	43.4939
0	0.0901515	0.221046	0.248047	0.248047	0.350791	0.461892	0.496094	0.55465	0.701583	0.784393	0.992188	1.17028	1.2648	1.44635	1.75396	2.28688	3.45489	43.496
0	0.0902182	0.221211	0.248047	0.248047	0.350791	0.462037	0.496094	0.55465	0.701583	0.784393	0.992188	1.17119	1.2648	1.44635	1.75396	2.28688	3.45489	43.6203
0	0.0903764	0.221754	0.248047	0.248047	0.350791	0.462358	0.496094	0.55465	0.702841	0.784393	0.992188	1.17212	1.2648	1.44635	1.75396	2.28688	3.45489	44.0226
0	0.0906185	0.222619	0.248047	0.248047	0.350791	0.46241	0.496094	0.55465	0.702955	0.784393	0.992188	1.17362	1.2648	1.44635	1.75396	2.28688	3.45489	44.0442
0	0.0924457	0.222753	0.248047	0.248047	0.350791	0.462873	0.496094	0.55465	0.703379	0.784393	0.992188	1.17473	1.2648	1.44635	1.75396	2.28688	3.47266	44.24
0	0.092834	0.223	0.248047	0.248047	0.350791	0.463231	0.496094	0.55465	0.704209	0.784393	0.992188	1.17752	1.2648	1.44635	1.75396	2.28688	3.47266	44.3838
0	0.0929539	0.223094	0.248047	0.248047	0.350791	0.463488	0.496094	0.55465	0.704219	0.784393	0.992188	1.17756	1.2648	1.44635	1.75396	2.28688	3.47266	44.5537
0	0.09302	0.223899	0.248047	0.248047	0.350791	0.464039	0.496094	0.55465	0.704997	0.784393	0.992188	1.18116	1.2648	1.44635	1.75396	2.28688	3.4815	44.6002
0	0.0934702	0.225478	0.248047	0.248047	0.350791	0.464316	0.496094	0.55465	0.70546	0.784393	0.992188	1.18198	1.2648	1.44635	1.75396	2.28688	3.4815	44.6767
0	0.0940503	0.226026	0.248047	0.248047	0.350791	0.464351	0.496094	0.55465	0.706104	0.784732	0.992188	1.18393	1.2648	1.44635	1.75396	2.28716	3.50791	44.8005
0	0.0940842	0.226133	0.248047	0.248047	0.350791	0.464619	0.496094	0.55465	0.706238	0.786457	0.992188	1.18437	1.2648	1.44635	1.75396	2.30053	3.50791	44.8389
0	0.0944412	0.226212	0.248047	0.248047	0.350791	0.466598	0.496094	0.55465	0.706381	0.787934	0.992188	1.1884	1.2648	1.44635	1.75396	2.30198	3.50791	44.8499
0	0.0950542	0.226477	0.248047	0.248047	0.350791	0.466767	0.496094	0.55465	0.706729	0.788728	0.992188	1.18887	1.2648	1.44635	1.75396	2.31867	3.50791	44.9403
0	0.0955005	0.226922	0.248047	0.248047	0.350791	0.467994	0.496094	0.55465	0.706769	0.789023	0.992188	1.18904	1.2648	1.44635	1.75396	2.32212	3.50791	44.9458
0	0.0955808	0.227692	0.248047	0.248047	0.350791	0.468913	0.496094	0.555725	0.707444	0.790195	0.992188	1.18954	1.2648	1.44635	1.75396	2.3236	3.50791	44.9574
0	0.0956735	0.227769	0.248047	0.248047	0.350791	0.469343	0.496094	0.556471	0.70872	0.790508	0.992188	1.19119	1.2648	1.44635	1.75396	2.32361	3.50791	44.9793
0	0.0963764	0.228038	0.248047	0.248047	0.350791	0.471778	0.496094	0.557557	0.708856	0.790508	0.992188	1.19196	1.2648	1.44635	1.75396	2.32411	3.50791	45.2507
0	0.0972778	0.228129	0.248047	0.248047	0.350791	0.472118	0.496094	0.558562	0.712317	0.790852	0.992188	1.19298	1.2648	1.44635	1.75396	2.32878	3.50791	45.3648
0	0.0973637	0.2283	0.248047	0.248047	0.350791	0.472799	0.496094	0.559721	0.717227	0.793457	0.992188	1.19501	1.2648	1.44635	1.75396	2.32896	3.52541	45.5485
0	0.0981367	0.228362	0.248047	0.248047	0.350791	0.474267	0.496094	0.559992	0.718871	0.793612	0.992188	1.19588	1.2648	1.44635	1.75396	2.33412	3.55149	45.5556
0	0.0983922	0.228505	0.248047	0.248047	0.350791	0.474876	0.496094	0.561283	0.719213	0.794118	0.992188	1.19698	1.2648	1.44637	1.75396	2.33945	3.55149	46.733
0	0.0990853	0.228922	0.248047	0.248047	0.350791	0.474912	0.496094	0.562759	0.722309	0.798857	0.992188	1.1985	1.2648	1.45294	1.75396	2.33999	3.55149	46.8704
0	0.099186	0.229949	0.248047	0.248047	0.350791	0.475208	0.496094	0.565475	0.724134	0.799291	0.992188	1.19873	1.2648	1.45595	1.75396	2.34007	3.65482	47.1426
0	0.0997008	0.230067	0.248047	0.248047	0.350791	0.475248	0.496094	0.566539	0.726337	0.799877	0.992188	1.19937	1.2648	1.45733	1.75396	2.34007	3.66237	47.3796
0	0.0999909	0.230711	0.248047	0.248047	0.350791	0.476834	0.496094	0.567378	0.728293	0.800257	0.992188	1.2	1.2648	1.46278	1.75396	2.34007	3.68748	47.4088
0	0.100433	0.23075	0.248047	0.248047	0.350791	0.477155	0.496094	0.570241	0.731131	0.804375	0.992188	1.20113	1.2648	1.46582	1.75396	2.34007	3.68748	47.4282
0	0.100583	0.230778	0.248047	0.248047	0.350791	0.477392	0.496094	0.57058	0.735399	0.80449	0.992188	1.20148	1.2648	1.47005	1.75396	2.34007	3.68748	47.5351
0	0.100805	0.231988	0.248047	0.248047	0.350791	0.477829	0.496094	0.571823	0.736328	0.807261	0.992188	1.20279	1.2648	1.47106	1.75396	2.34007	3.68748	47.5384
0	0.100913	0.232066	0.248047	0.248047	0.350791	0.478028	0.496094	0.573576	0.738274	0.810889	0.992188	1.20771	1.2648	1.47146	1.75396	2.34007	3.68748	47.5429
0	0.101101	0.23231	0.248047	0.248047	0.350791	0.478092	0.496094	0.574529	0.73862	0.810991	0.992188	1.20861	1.2648	1.47274	1.75396	2.34007	3.68748	48.068
0	0.102176	0.232459	0.248047	0.248047	0.350791	0.478156	0.496094	0.578082	0.74076	0.812402	0.992188	1.21131	1.2648	1.47433	1.75396	2.34007	3.68748	48.1556
0	0.102199	0.233244	0.248047	0.248047	0.350791	0.478393	0.496094	0.578611	0.743053	0.813606	0.992188	1.21141	1.2648	1.47478	1.75396	2.34007	3.68748	48.9112
0	0.102413	0.233262	0.248047	0.248047	0.350791	0.478687	0.496094	0.580687	0.744141	0.814474	0.992188	1.21159	1.2648	1.47629	1.75396	2.34007	3.7207	48.9564
0	0.102677	0.233563	0.248047	0.248047	0.350791	0.48008	0.496094	0.580847	0.744141	0.816584	0.992188	1.21413	1.2648	1.47803	1.75396	2.34007	3.7207	49.1971
0	0.102994	0.233577	0.248047	0.248047	0.350791	0.480624	0.496094	0.580984	0.744141	0.816823	0.992188	1.21443	1.2648	1.48092	1.75396	2.34007	3.7207	49.7011
0	0.103058	0.233686	0.248047	0.248104	0.350791	0.481133	0.496094	0.581724	0.744141	0.816976	0.992188	1.21453	1.2648	1.48356	1.75396	2.34007	3.7207	49.8475
0	0.103801	0.234535	0.248047	0.249281	0.350791	0.481856	0.496094	0.582715	0.744141	0.817621	0.992188	1.21493	1.2648	1.48442	1.75396	2.34007	3.7207	50.1134
0	0.103803	0.23461	0.248047	0.249877	0.350791	0.482113	0.496094	0.583855	0.744141	0.819026	0.992188	1.2175	1.2648	1.48496	1.75396	2.34007	3.7207	50.4731
0	0.103892	0.234974	0.248047	0.250262	0.350791	0.482315	0.496094	0.584983	0.744141	0.819684	0.992188	1.21968	1.2648	1.48728	1.75396	2.34007	3.72896	51.0091
0	0.104151	0.235013	0.248047	0.250751	0.350791	0.482669	0.496094	0.585591	0.744141	0.820232	0.992188	1.21978	1.2648	1.48828	1.75396	2.34007	3.72896	51.1488
0	0.104168	0.235311	0.248047	0.251521	0.350791	0.4827	0.496634	0.587274	0.744141	0.821315	0.992188	1.22042	1.2648	1.48828	1.75396	2.34007	3.72896	51.1771
0	0.104372	0.236011	0.248047	0.251829	0.350791	0.482723	0.496863	0.587381	0.744141	0.821473	0.992188	1.2211	1.2648	1.48828	1.75396	2.34007	3.72896	51.1831
0	0.104589	0.236316	0.248047	0.252174	0.350791	0.48425	0.496991	0.588108	0.744141	0.822994	0.992188	1.22162	1.2648	1.48828	1.75396	2.34007	3.78627	51.2497
0	0.104937	0.236441	0.248047	0.252463	0.350791	0.485207	0.497387	0.588251	0.744141	0.824424	0.992188	1.22238	1.2648	1.48828	1.75396	2.34007	3.78627	51.2546
0	0.105198	0.236782	0.248047	0.253665	0.350791	0.485376	0.499979	0.58843	0.744141	0.826311	0.992188	1.22409	1.2648	1.48828	1.75396	2.34007	3.78627	51.2888
0	0.105293	0.236967	0.248047	0.253919	0.350791	0.486219	0.500717	0.588605	0.744141	0.826478	0.992547	1.22545	1.2648	1.48828	1.75396	2.34007	3.79439	51.463
0	0.106561	0.237216	0.248047	0.254861	0.350791	0.486871	0.501187	0.589294	0.744141	0.829502	0.992611	1.22599	1.2648	1.48828	1.76405	2.3437	3.79439	53.013
0	0.106604	0.23732	0.248047	0.255733	0.350791	0.489242	0.501307	0.59361	0.744141	0.830517	0.993026	1.22712	1.2648	1.48828	1.7662	2.34681	3.79439	53.0826
0	0.106862	0.237994	0.248047	0.255779	0.350791	0.489645	0.501619	0.593714	0.744141	0.838253	0.993575	1.22742	1.2648	1.48828	1.76666	2.35318	3.85072	55.0686
0	0.107727	0.238877	0.248047	0.256242	0.350791	0.489814	0.501739	0.593831	0.744141	0.838272	0.996943	1.22919	1.2648	1.48828	1.7711	2.35318	3.87462	55.2271
0	0.107886	0.238983	0.248047	0.257229	0.350791	0.491118	0.502681	0.594615	0.744141	0.838955	0.997019	1.22937	1.2648	1.48828	1.77519	2.35318	3.87462	56.8027
0	0.107964	0.239298	0.248047	0.257241	0.350791	0.4929	0.503055	0.59545	0.744141	0.839138	0.999449	1.23298	1.2648	1.48828	1.77548	2.35318	3.88255	58.4002
0	0.108179	0.239559	0.248047	0.258118	0.350791	0.493062	0.504726	0.596253	0.744141	0.84175	1.00069	1.23602	1.2648	1.48828	1.77846	2.36693	3.92197	59.8719
0	0.108291	0.239788	0.248047	0.258944	0.350791	0.495406	0.506294	0.597735	0.744141	0.843223	1.00159	1.24023	1.2648	1.48828	1.77891	2.36797	3.92197	60.9656
0	0.108555	0.241148	0.248047	0.261273	0.350791	0.496094	0.506905	0.598313	0.744141	0.843226	1.00329	1.24023	1.2648	1.48828	1.78165	2.36869	3.92197	61.5126
0	0.109311	0.241226	0.248047	0.261353	0.351648	0.496094	0.507042	0.599465	0.744141	0.850645	1.00469	1.24023	1.2648	1.48828	1.78668	2.3802	3.92197	62.1336
0	0.109923	0.242157	0.248047	0.261564	0.352969	0.496094	0.507182	0.599892	0.744141	0.85286	1.00764	1.24023	1.2648	1.48828	1.78841	2.38073	3.92197
0	0.110013	0.242458	0.248047	0.261727	0.353446	0.496094	0.507435	0.600768	0.744141	0.85439	1.00969	1.24023	1.2648	1.48828	1.78869	2.38291	3.92197
0	0.11025	0.242874	0.248047	0.26185	0.354235	0.496094	0.508131	0.600855	0.744141	0.855598	1.01064	1.24023	1.2648	1.48828	1.78869	2.38599	3.92197
0	0.110341	0.243138	0.248047	0.262147	0.356523	0.496094	0.508332	0.601021	0.744141	0.85601	1.01243	1.24023	1.2648	1.48828	1.78869	2.38933	3.92197
0	0.111029	0.243159	0.248047	0.262597	0.357498	0.496094	0.50867	0.601936	0.744141	0.859996	1.01292	1.24023	1.2648	1.48828	1.78869	2.39245	3.99964
0	0.111825	0.243668	0.248047	0.263715	0.357634	0.496094	0.509027	0.604161	0.744141	0.860499	1.01359	1.24023	1.2648	1.48828	1.78869	2.39321	4.03791
0	0.112267	0.243693	0.248047	0.26463	0.357657	0.496094	0.509656	0.605488	0.744141	0.863296	1.01505	1.24023	1.2648	1.48828	1.78869	2.41796	4.06827
0	0.112614	0.244393	0.248047	0.264761	0.357942	0.496094	0.51038	0.606173	0.744141	0.863655	1.0169	1.24023	1.2648	1.48828	1.78869	2.4417	4.06827
0	0.11291	0.244855	0.248047	0.265072	0.358324	0.496094	0.511278	0.60641	0.744141	0.865282	1.01813	1.24023	1.2648	1.48828	1.78869	2.44298	4.06827
0	0.113105	0.244996	0.248047	0.265424	0.358861	0.496094	0.511816	0.607422	0.744141	0.866296	1.02016	1.24023	1.2648	1.48828	1.78869	2.44298	4.10591
0	0.113116	0.24574	0.248047	0.265549	0.359393	0.496094	0.511868	0.610254	0.744141	0.866493	1.02186	1.24023	1.2648	1.49091	1.78869	2.44298	4.12832
0	0.113703	0.245792	0.248047	0.265572	0.359395	0.496094	0.511947	0.610543	0.744141	0.866631	1.02272	1.24023	1.2648	1.49234	1.78869	2.44298	4.15802
0	0.113921	0.245811	0.248047	0.266366	0.359713	0.496094	0.513696	0.61103	0.744141	0.869239	1.02272	1.24023	1.2648	1.49242	1.78869	2.44298	4.15802
0	0.11415	0.246044	0.248047	0.266683	0.360941	0.496094	0.515096	0.613374	0.744141	0.869441	1.02272	1.24023	1.2648	1.49349	1.78869	2.44298	4.2095
0	0.114171	0.247479	0.248047	0.267912	0.360946	0.496094	0.51555	0.614501	0.744141	0.872462	1.02272	1.24023	1.2648	1.50046	1.78869	2.44298	4.2095
0	0.114318	0.247487	0.248047	0.269	0.3622	0.496094	0.516644	0.6153	0.744141	0.872685	1.02272	1.24023	1.2648	1.50671	1.78869	2.44298	4.2168
0	0.114936	0.247927	0.248047	0.269308	0.362474	0.496094	0.517427	0.615453	0.744141	0.873573	1.02272	1.24023	1.26482	1.50881	1.78869	2.44298	4.22409
0	0.115424	0.248047	0.248047	0.269792	0.363437	0.496094	0.5176	0.616262	0.744141	0.875595	1.02272	1.24023	1.26508	1.50881	1.78869	2.44298	4.22409
0	0.115603	0.248047	0.248047	0.270103	0.363477	0.496094	0.518419	0.616463	0.744141	0.877352	1.02272	1.24023	1.26794	1.50881	1.78869	2.44346	4.26756
0	0.115893	0.248047	0.248047	0.270549	0.364956	0.496094	0.518996	0.617555	0.744141	0.878748	1.02272	1.24023	1.26818	1.50881	1.78869	2.44747	4.26756
0	0.116424	0.248047	0.248047	0.271011	0.366231	0.496094	0.521426	0.617954	0.744141	0.882865	1.02272	1.24023	1.26899	1.50881	1.78869	2.44783	4.26756
0	0.116622	0.248047	0.248047	0.271716	0.366325	0.496094	0.521441	0.620572	0.744141	0.88393	1.02272	1.24023	1.26977	1.50881	1.78869	2.45032	4.26756
0	0.116898	0.248047	0.248047	0.271966	0.366785	0.496094	0.521887	0.620798	0.744141	0.884998	1.02272	1.24023	1.27121	1.50881	1.7914	2.45246	4.26756
0	0.117302	0.248047	0.248047	0.272193	0.369348	0.496094	0.522005	0.620854	0.744141	0.886404	1.02272	1.24023	1.27159	1.50881	1.79976	2.45334	4.33195
0	0.117769	0.248047	0.248047	0.272875	0.370973	0.496094	0.523376	0.625991	0.744141	0.887529	1.02272	1.24023	1.2734	1.50881	1.80581	2.45554	4.33195
0	0.117808	0.248047	0.248047	0.274334	0.371473	0.496094	0.523942	0.626212	0.744141	0.888076	1.02272	1.24023	1.2787	1.50881	1.80581	2.45554	4.36031
0	0.1187	0.248047	0.248047	0.274551	0.371827	0.496094	0.524059	0.627341	0.744141	0.890822	1.02272	1.24023	1.27957	1.50881	1.80581	2.45554	4.47173
0	0.118849	0.248047	0.248047	0.274655	0.372262	0.496094	0.524202	0.628585	0.744141	0.89088	1.02272	1.24023	1.28057	1.50881	1.80581	2.45554	4.47173
0	0.118988	0.248047	0.248047	0.274723	0.372505	0.496094	0.525718	0.629563	0.744141	0.891447	1.02272	1.24023	1.28073	1.50881	1.80581	2.45554	4.47173
0	0.119066	0.248047	0.248047	0.275979	0.372551	0.496094	0.5266	0.630031	0.744141	0.894346	1.02272	1.24023	1.28124	1.50881	1.80581	2.45665	4.52643
0	0.119433	0.248047	0.248047	0.27645	0.37292	0.496094	0.526886	0.635381	0.744141	0.894346	1.02272	1.24023	1.28143	1.50881	1.80581	2.46124	4.55354
0	0.119637	0.248047	0.248047	0.277043	0.373324	0.496094	0.527094	0.637712	0.744141	0.894346	1.02272	1.24023	1.28161	1.50881	1.80581	2.46257	4.55354
0	0.119665	0.248047	0.248047	0.27724	0.37347	0.496094	0.527376	0.63848	0.744141	0.894346	1.02272	1.24023	1.28437	1.50881	1.80581	2.46909	4.56029
0	0.119742	0.248047	0.248047	0.277671	0.374247	0.496094	0.527587	0.639179	0.744141	0.894346	1.02272	1.24023	1.28605	1.50881	1.80581	2.47828	4.61394
0	0.120675	0.248047	0.248047	0.278211	0.374486	0.496094	0.53029	0.640042	0.744141	0.894346	1.02272	1.24023	1.28781	1.50881	1.80581	2.48047	4.66038
0	0.121213	0.248047	0.248047	0.278692	0.374514	0.496094	0.531338	0.64119	0.744141	0.894346	1.02272	1.24023	1.28872	1.50881	1.80581	2.48047	4.68014
0	0.121987	0.248047	0.248047	0.278836	0.374592	0.496094	0.531558	0.642188	0.744141	0.894346	1.02272	1.24023	1.28967	1.50881	1.80581	2.48047	4.68014
0	0.122699	0.248047	0.248047	0.280001	0.374866	0.496094	0.531674	0.642351	0.744141	0.894346	1.02272	1.24023	1.28972	1.50881	1.80793	2.48047	4.70636
0	0.123452	0.248047	0.248047	0.280344	0.375421	0.496094	0.531865	0.643106	0.744141	0.894346	1.02272	1.24023	1.29103	1.50881	1.81888	2.48047	4.73893
0	0.123965	0.248047	0.248047	0.280547	0.375696	0.496094	0.5327	0.643808	0.744141	0.894346	1.02272	1.24023	1.2958	1.50881	1.83403	2.48047	4.76482
0	0.12455	0.248047	0.248047	0.280552	0.376596	0.496094	0.534598	0.644033	0.744141	0.894346	1.02272	1.24023	1.29708	1.50881	1.85741	2.48047	4.76482
0	0.125045	0.248047	0.248047	0.280879	0.377698	0.496094	0.535323	0.646793	0.744141	0.894346	1.02272	1.24023	1.30065	1.5101	1.87108	2.48047	4.76482
0	0.125783	0.248047	0.248047	0.281106	0.378442	0.496094	0.535834	0.647062	0.744141	0.894346	1.02272	1.24023	1.30152	1.51154	1.87391	2.48047	4.77128
0	0.12579	0.248047	0.248047	0.281247	0.378857	0.496094	0.536255	0.647746	0.744141	0.894346	1.02272	1.24023	1.30359	1.51518	1.87722	2.48047	4.77128
0	0.12583	0.248047	0.248047	0.281825	0.379013	0.496094	0.536544	0.64929	0.744141	0.894346	1.02272	1.24023	1.30844	1.51837	1.88864	2.48047	4.79058
0	0.126496	0.248047	0.248047	0.284125	0.379341	0.496094	0.536713	0.651474	0.744141	0.894346	1.02272	1.24023	1.30989	1.51973	1.88907	2.48047	4.79058
0	0.126594	0.248047	0.248047	0.285218	0.379357	0.496094	0.538176	0.653647	0.744141	0.894346	1.02515	1.24023	1.3122	1.52031	1.88907	2.48047	4.88596
0	0.126803	0.248047	0.248047	0.285251	0.379367	0.496094	0.541239	0.656423	0.744141	0.894346	1.02905	1.24023	1.31641	1.52275	1.88907	2.48047	4.88596
0	0.126854	0.248047	0.248047	0.285766	0.380812	0.496094	0.542461	0.656585	0.744141	0.894346	1.03294	1.24023	1.31673	1.52284	1.88907	2.48047	4.88596
0	0.127066	0.248047	0.248047	0.286023	0.380917	0.496094	0.54257	0.657472	0.744141	0.894346	1.03306	1.24023	1.31799	1.52789	1.88907	2.48047	4.89225
0	0.127473	0.248047	0.248047	0.286097	0.381103	0.496094	0.542652	0.657754	0.744141	0.894346	1.03346	1.24023	1.31831	1.52841	1.88907	2.48047	4.96094
0	0.127757	0.248047	0.248047	0.287496	0.381285	0.496094	0.544013	0.658139	0.744141	0.894346	1.03524	1.24023	1.31925	1.53063	1.88907	2.48047	5.02257
0	0.127898	0.248047	0.248047	0.28774	0.384416	0.496094	0.544116	0.659699	0.744141	0.894346	1.03668	1.24023	1.32114	1.53113	1.88907	2.48047	5.02257
0	0.127926	0.248047	0.248047	0.287756	0.385601	0.496094	0.544944	0.659792	0.744141	0.894346	1.03881	1.24023	1.3232	1.5318	1.88907	2.48047	5.11362
0	0.128517	0.248047	0.248047	0.288329	0.385634	0.496094	0.544968	0.659992	0.744141	0.894346	1.03891	1.24023	1.32481	1.5409	1.88907	2.48047	5.17937
0	0.12867	0.248047	0.248047	0.28852	0.386132	0.496094	0.544972	0.661116	0.744141	0.894346	1.04045	1.24023	1.32739	1.54207	1.88907	2.48047	5.21489
0	0.129637	0.248047	0.248047	0.288828	0.386358	0.496094	0.546195	0.661276	0.744141	0.894346	1.04125	1.24023	1.32759	1.55373	1.88907	2.4853	5.32579
0	0.129747	0.248047	0.248047	0.28936	0.387061	0.496094	0.546409	0.661403	0.744141	0.894346	1.0418	1.24023	1.32835	1.55611	1.88907	2.48653	5.3546
0	0.129871	0.248047	0.248047	0.289614	0.38708	0.496094	0.547079	0.66219	0.744141	0.894346	1.04288	1.24023	1.32989	1.56321	1.88907	2.49171	5.44009
0	0.130183	0.248047	0.248047	0.289632	0.387749	0.496094	0.548481	0.662221	0.744141	0.894346	1.04491	1.24023	1.33412	1.56492	1.88907	2.49284	5.46267
0	0.130349	0.248047	0.248047	0.290764	0.387783	0.496094	0.548547	0.663136	0.744141	0.894346	1.04742	1.24023	1.33427	1.56879	1.89074	2.49284	5.50753
0	0.130499	0.248047	0.248047	0.292203	0.387845	0.496094	0.549174	0.664877	0.744141	0.894346	1.0484	1.24023	1.33577	1.56879	1.89129	2.49284	5.50753
0	0.130514	0.248047	0.248047	0.292734	0.388155	0.496094	0.549893	0.666366	0.744141	0.894346	1.05015	1.24023	1.33577	1.56879	1.90207	2.49284	5.55873
0	0.13066	0.248047	0.248047	0.293809	0.388202	0.496094	0.55002	0.667642	0.744141	0.894346	1.05107	1.24023	1.33577	1.56879	1.92233	2.49284	5.64255
0	0.13084	0.248047	0.248047	0.294001	0.388334	0.496094	0.550853	0.667678	0.744141	0.894346	1.05145	1.24023	1.33577	1.56879	1.92493	2.49284	5.80663
0	0.130875	0.248047	0.248047	0.29521	0.38875	0.496094	0.552147	0.668051	0.744141	0.894346	1.05148	1.24023	1.33577	1.56879	1.92666	2.49284	5.81192
0	0.130907	0.248047	0.248047	0.295363	0.388965	0.496094	0.55465	0.668444	0.744141	0.894346	1.05183	1.24023	1.33577	1.56879	1.93054	2.49284	5.88033
0	0.131217	0.248047	0.248047	0.295589	0.389142	0.496094	0.55465	0.66885	0.744141	0.894346	1.05235	1.24023	1.33577	1.56879	1.93731	2.49284	5.88033
0	0.131509	0.248047	0.248047	0.295883	0.389608	0.496094	0.55465	0.669075	0.744141	0.894346	1.05237	1.24023	1.33577	1.56879	1.93731	2.49284	6.00458
0	0.131865	0.248047	0.248047	0.296986	0.391139	0.496094	0.55465	0.671377	0.744141	0.894346	1.05237	1.24023	1.33577	1.56879	1.93731	2.49488	6.00458
0	0.132116	0.248047	0.248047	0.298066	0.391169	0.496094	0.55465	0.672465	0.744141	0.894346	1.05237	1.24023	1.33577	1.56879	1.93731	2.50011	6.20117
0	0.13224	0.248047	0.248047	0.298252	0.391355	0.496094	0.55465	0.673245	0.744141	0.894346	1.05237	1.24023	1.33577	1.56879	1.93731	2.51837	6.26042
0	0.132369	0.248047	0.248047	0.299634	0.392561	0.496094	0.55465	0.673682	0.744141	0.894346	1.05237	1.24023	1.33577	1.56879	1.93731	2.52254	6.51094
0	0.132692	0.248047	0.248047	0.299653	0.393183	0.496094	0.55465	0.674458	0.744141	0.894346	1.05237	1.24023	1.33577	1.56879	1.93731	2.52959	6.54863
0	0.132897	0.248047	0.248047	0.300142	0.393577	0.496094	0.55465	0.67466	0.744141	0.894346	1.05237	1.24023	1.33577	1.56879	1.93731	2.52959	6.61872
0	0.133171	0.248047	0.248047	0.302466	0.394135	0.496094	0.55465	0.675626	0.744141	0.894346	1.05237	1.24023	1.33577	1.5693	1.93731	2.52959	6.67887
0	0.133287	0.248047	0.248047	0.30322	0.394265	0.496094	0.55465	0.675626	0.744141	0.894346	1.05237	1.24023	1.33577	1.57037	1.93731	2.52959	6.67887
0	0.133293	0.248047	0.248047	0.304248	0.394728	0.496094	0.55465	0.67693	0.744141	0.894346	1.05237	1.24023	1.33577	1.57171	1.93731	2.52959	6.7476
0	0.133351	0.248047	0.248047	0.304393	0.395256	0.496094	0.55465	0.677177	0.744141	0.896215	1.05237	1.24023	1.33577	1.57403	1.93731	2.5373	6.7749
0	0.13346	0.248047	0.248047	0.304567	0.396062	0.496094	0.55465	0.677334	0.744141	0.896697	1.05237	1.24023	1.33577	1.57453	1.93731	2.54597	6.81209
0	0.133602	0.248047	0.248047	0.30701	0.396333	0.496094	0.55465	0.678595	0.744141	0.900197	1.05237	1.24023	1.33577	1.58042	1.93731	2.54809	6.89642
0	0.134305	0.248047	0.248047	0.307374	0.396425	0.496094	0.55465	0.678724	0.744141	0.90073	1.05237	1.24023	1.33577	1.58144	1.93731	2.5538	6.91869
0	0.135438	0.248047	0.248047	0.307618	0.397378	0.496094	0.55465	0.678941	0.744141	0.901283	1.05237	1.24023	1.33577	1.58187	1.93731	2.5538	6.98506
0	0.13548	0.248047	0.248047	0.307679	0.398227	0.496094	0.55465	0.681061	0.744141	0.902197	1.05237	1.24023	1.33577	1.58192	1.93731	2.5538	7.02459
0	0.135917	0.248047	0.248047	0.308321	0.398627	0.496094	0.55465	0.682137	0.744141	0.902612	1.05237	1.24023	1.33577	1.58509	1.93731	2.5538	7.10731
0	0.136341	0.248047	0.248047	0.309803	0.39986	0.496094	0.55465	0.683794	0.744141	0.913317	1.05237	1.24023	1.33577	1.58827	1.93731	2.5538	7.14185
0	0.136396	0.248047	0.248047	0.310005	0.400605	0.496094	0.55465	0.685418	0.744141	0.914223	1.05621	1.24023	1.33577	1.58827	1.93731	2.5538	7.15477
0	0.136443	0.248047	0.248047	0.310294	0.401827	0.496094	0.55465	0.685806	0.744141	0.916687	1.05668	1.24023	1.33577	1.58827	1.93731	2.5538	7.21045
0	0.136798	0.248047	0.248047	0.310504	0.402353	0.496094	0.55465	0.685875	0.744141	0.917608	1.0581	1.24023	1.33577	1.58827	1.93731	2.5538	7.23175
0	0.137122	0.248047	0.248047	0.310661	0.402986	0.496094	0.55465	0.686872	0.744141	0.918146	1.06014	1.24023	1.33577	1.58827	1.93731	2.5538	7.36662
0	0.13751	0.248047	0.248047	0.310769	0.404606	0.496094	0.55465	0.687333	0.744141	0.918743	1.06297	1.24023	1.33577	1.58827	1.93731	2.5538	7.37496
0	0.137575	0.248047	0.248047	0.311032	0.404653	0.496094	0.55465	0.687362	0.744141	0.920226	1.064	1.24023	1.33577	1.58827	1.93731	2.5538	7.54405
0	0.137733	0.248047	0.248047	0.311065	0.405466	0.496094	0.55465	0.687726	0.744141	0.920757	1.0642	1.24023	1.33577	1.58827	1.93731	2.5538	7.56035
0	0.137915	0.248047	0.248047	0.311324	0.405542	0.496094	0.55465	0.688119	0.744141	0.92555	1.06617	1.24023	1.33577	1.58827	1.93731	2.5538	7.59283
0	0.13822	0.248047	0.248047	0.311403	0.405724	0.496094	0.55465	0.688518	0.744141	0.926295	1.06733	1.24023	1.33577	1.58827	1.93731	2.56096	7.72538
0	0.138514	0.248047	0.248047	0.3117	0.405805	0.496094	0.55465	0.688807	0.744141	0.927655	1.06893	1.24023	1.33577	1.58827	1.93731	2.56534	7.74923
0	0.138617	0.248047	0.248047	0.312446	0.40675	0.496094	0.55465	0.689478	0.744141	0.930649	1.07073	1.24023	1.33577	1.58827	1.93731	2.58364	7.91032
0	0.139194	0.248047	0.248047	0.313535	0.407216	0.496094	0.55465	0.689547	0.744141	0.933552	1.07084	1.24023	1.33577	1.58827	1.93731	2.58715	7.91421
0	0.139201	0.248047	0.248047	0.313689	0.408418	0.496094	0.55465	0.690274	0.744141	0.934216	1.07114	1.24023	1.33577	1.58827	1.93731	2.58969	7.97231
0	0.139213	0.248047	0.248047	0.314055	0.409369	0.496094	0.55465	0.690913	0.744141	0.935312	1.07125	1.24023	1.33577	1.58827	1.94336	2.58969	7.98773
0	0.139363	0.248047	0.248047	0.314581	0.410422	0.496094	0.55465	0.690942	0.744141	0.93781	1.07146	1.24023	1.33577	1.58827	1.95705	2.58969	8.13654
0	0.139411	0.248047	0.248047	0.316044	0.410466	0.496094	0.55465	0.691159	0.744141	0.938676	1.07537	1.24023	1.33577	1.58827	1.95721	2.58969	8.14587
0	0.140174	0.248047	0.248047	0.316142	0.410581	0.496094	0.55465	0.69153	0.744141	0.93955	1.07572	1.24023	1.33577	1.58827	1.96114	2.61791	8.1592
0	0.140378	0.248047	0.248047	0.317746	0.410807	0.496094	0.55465	0.691718	0.744141	0.939798	1.07653	1.24023	1.33577	1.58827	1.96257	2.61913	8.20057
0	0.141028	0.248047	0.248047	0.318967	0.411807	0.496094	0.55465	0.692489	0.744141	0.939992	1.07828	1.24023	1.33577	1.58827	1.96957	2.61931	8.2193
0	0.141243	0.248047	0.248047	0.318979	0.411815	0.496094	0.55465	0.692584	0.744141	0.940397	1.07865	1.24023	1.33577	1.58827	1.97527	2.62477	8.6639
0	0.141453	0.248047	0.248047	0.320202	0.412281	0.496094	0.55465	0.693895	0.744141	0.941629	1.08	1.24023	1.33577	1.58827	1.97708	2.62621	8.98806
0	0.141474	0.248047	0.248047	0.320518	0.413408	0.496094	0.55465	0.697036	0.744141	0.944596	1.08039	1.24023	1.33577	1.58827	1.98222	2.62772	9.18109
0	0.141662	0.248047	0.248047	0.320701	0.413674	0.496094	0.55465	0.697794	0.747232	0.9477	1.08227	1.24023	1.33577	1.58827	1.98351	2.62947	9.19671
0	0.141973	0.248047	0.248047	0.320984	0.414691	0.496094	0.55465	0.698174	0.747367	0.947842	1.08367	1.24023	1.33577	1.58827	1.98438	2.63416	9.23121
0	0.142145	0.248047	0.248047	0.321713	0.415291	0.496094	0.55465	0.698629	0.748518	0.948262	1.08555	1.24023	1.33577	1.58827	1.98438	2.63677	9.3767
0	0.142526	0.248047	0.248047	0.321939	0.415572	0.496094	0.55465	0.698736	0.750474	0.948938	1.08607	1.24023	1.33577	1.58827	1.98438	2.63677	9.42578
0	0.142715	0.248047	0.248047	0.323434	0.416582	0.496094	0.55465	0.699128	0.750803	0.954989	1.08949	1.24023	1.33577	1.58827	1.98438	2.63677	9.43696
0	0.142991	0.248047	0.248047	0.323477	0.417793	0.496094	0.55465	0.700141	0.751209	0.955215	1.09215	1.24023	1.33577	1.58827	1.98438	2.63677	9.64835
0	0.143156	0.248047	0.248047	0.324163	0.418218	0.496094	0.55465	0.700361	0.752299	0.955412	1.09261	1.24023	1.33577	1.58827	1.98438	2.63677	9.97136
0	0.143206	0.248047	0.248047	0.32666	0.419791	0.496094	0.55465	0.701551	0.752527	0.956145	1.09332	1.24023	1.33577	1.58827	1.98438	2.63677	10.0329
0	0.143372	0.248047	0.248047	0.326685	0.420408	0.496094	0.55465	0.701583	0.756188	0.957604	1.09491	1.24023	1.33577	1.58827	1.98438	2.67011	10.0727
0	0.144108	0.248047	0.248047	0.327047	0.420937	0.496094	0.55465	0.701583	0.757018	0.957979	1.09533	1.24023	1.33577	1.58827	1.98438	2.67155	10.1001
0	0.144513	0.248047	0.248047	0.327515	0.422177	0.496094	0.55465	0.701583	0.75786	0.958961	1.09598	1.24023	1.33577	1.58827	1.98438	2.67155	10.179
0	0.145012	0.248047	0.248047	0.328034	0.423142	0.496094	0.55465	0.701583	0.758989	0.959541	1.0991	1.24023	1.33577	1.58827	1.98438	2.67155	10.2272
0	0.146382	0.248047	0.248047	0.328673	0.423441	0.496094	0.55465	0.701583	0.760495	0.960015	1.10016	1.24023	1.33577	1.58827	1.98438	2.67155	10.2272
0	0.146603	0.248047	0.248047	0.328815	0.423958	0.496094	0.55465	0.701583	0.767805	0.961357	1.10033	1.24023	1.33577	1.58827	1.98438	2.67155	10.4327
0	0.146675	0.248047	0.248047	0.328984	0.425183	0.496094	0.55465	0.701583	0.769224	0.967343	1.10168	1.24023	1.33577	1.58827	1.98438	2.67155	10.468
0	0.146742	0.248047	0.248047	0.329101	0.426627	0.496094	0.55465	0.701583	0.770823	0.96913	1.10266	1.24023	1.33577	1.58827	1.98619	2.67155	10.5296
0	0.146895	0.248047	0.248047	0.329196	0.426807	0.496094	0.55465	0.701583	0.772146	0.969803	1.10367	1.24023	1.33577	1.58827	1.99902	2.68304	10.6169
0	0.147176	0.248047	0.248047	0.329489	0.427924	0.496094	0.55465	0.701583	0.774247	0.970925	1.10428	1.24023	1.33577	1.58827	1.99982	2.68304	10.7121
0	0.14743	0.248047	0.248047	0.329502	0.428302	0.496094	0.55465	0.701583	0.7744	0.971469	1.10704	1.24023	1.33577	1.58827	1.99982	2.68304	10.9506
0	0.147626	0.248047	0.248047	0.329526	0.428635	0.496094	0.55465	0.701583	0.774914	0.972523	1.1093	1.24023	1.33577	1.58827	1.99982	2.68304	10.9506
0	0.147743	0.248047	0.248047	0.33061	0.428863	0.496094	0.55465	0.701583	0.775619	0.97347	1.1093	1.24023	1.33577	1.58827	1.99982	2.68304	10.9506
0	0.147754	0.248047	0.248047	0.33103	0.429564	0.496094	0.55465	0.701583	0.776353	0.973514	1.1093	1.24023	1.33577	1.58827	1.99982	2.68304	11.0095
0	0.147882	0.248047	0.248047	0.331919	0.429864	0.496094	0.55465	0.701583	0.776435	0.973572	1.1093	1.24023	1.33577	1.58827	1.99982	2.68304	11.0513
0	0.148099	0.248047	0.248047	0.332065	0.429879	0.496094	0.55465	0.701583	0.777007	0.974428	1.1093	1.24023	1.33577	1.58827	1.99982	2.68304	11.0763
0	0.148469	0.248047	0.248047	0.33326	0.429954	0.496094	0.55465	0.701583	0.777405	0.978213	1.1093	1.24023	1.33577	1.58827	1.99982	2.68304	11.1924
0	0.148549	0.248047	0.248047	0.333459	0.430593	0.496094	0.55465	0.701583	0.778197	0.97908	1.1093	1.24023	1.33577	1.58827	1.99982	2.68527	11.2308
0	0.149391	0.248047	0.248047	0.333641	0.430869	0.496094	0.55465	0.701583	0.780069	0.979837	1.1093	1.24023	1.33577	1.58827	1.99982	2.68997	11.3588
0	0.150436	0.248047	0.248047	0.334154	0.431014	0.496094	0.55465	0.701583	0.780688	0.980071	1.1093	1.24023	1.33577	1.58827	1.99982	2.69197	11.3805
0	0.150843	0.248047	0.248047	0.334514	0.43131	0.496094	0.55465	0.701583	0.781034	0.981164	1.1093	1.24023	1.33926	1.58827	1.99982	2.72852	11.4209
0	0.151102	0.248047	0.248047	0.335653	0.431444	0.496094	0.55465	0.701583	0.781273	0.981724	1.1093	1.24023	1.33926	1.58827	1.99982	2.72852	11.4452
0	0.151159	0.248047	0.248047	0.336389	0.432438	0.496094	0.55465	0.701583	0.784393	0.984558	1.1093	1.24023	1.34117	1.58827	1.99982	2.72852	11.4774
0	0.151329	0.248047	0.248047	0.338478	0.432612	0.496094	0.55465	0.701583	0.784393	0.98603	1.1093	1.24023	1.34193	1.58827	1.99982	2.72852	11.6767
0	0.151407	0.248047	0.248047	0.339126	0.433298	0.496094	0.55465	0.701583	0.784393	0.987798	1.1093	1.24023	1.34311	1.58827	1.99982	2.72852	11.7868
0	0.152166	0.248047	0.248047	0.340182	0.433998	0.496094	0.55465	0.701583	0.784393	0.98817	1.1093	1.24023	1.34551	1.58827	1.99982	2.73977	11.792
0	0.152211	0.248047	0.248047	0.340524	0.434281	0.496094	0.55465	0.701583	0.784393	0.989105	1.1093	1.24023	1.34651	1.58827	1.99982	2.73977	11.792
0	0.152368	0.248047	0.248047	0.341103	0.434604	0.496094	0.55465	0.701583	0.784393	0.989496	1.1093	1.24023	1.34732	1.58827	1.99982	2.73977	11.8259
0	0.152535	0.248047	0.248047	0.34173	0.434878	0.496094	0.55465	0.701583	0.784393	0.992188	1.1093	1.24023	1.34915	1.58827	1.99982	2.73977	11.87
0	0.152756	0.248047	0.248047	0.341766	0.436135	0.496094	0.55465	0.701583	0.784393	0.992188	1.1093	1.24023	1.35226	1.58827	1.99982	2.75792	11.9088
0	0.153077	0.248047	0.248047	0.342276	0.436391	0.496094	0.55465	0.701583	0.784393	0.992188	1.1093	1.24023	1.35467	1.58827	1.99982	2.75937	11.9321
0	0.153277	0.248047	0.248047	0.342526	0.436895	0.496094	0.55465	0.701583	0.784393	0.992188	1.1093	1.24023	1.35623	1.58827	1.99982	2.77325	12.0322
0	0.153396	0.248047	0.248047	0.343385	0.440045	0.496094	0.55465	0.701583	0.784393	0.992188	1.1093	1.24023	1.35628	1.58827	1.99982	2.77325	12.1947
0	0.153517	0.248047	0.248047	0.344328	0.440453	0.496094	0.55465	0.701583	0.784393	0.992188	1.1093	1.24023	1.36159	1.58827	1.99982	2.77325	12.2149
0	0.154402	0.248047	0.248047	0.344696	0.440571	0.496094	0.55465	0.701583	0.784393	0.992188	1.1093	1.24023	1.36199	1.58827	2.00055	2.77325	12.3152
0	0.154411	0.248047	0.248047	0.345223	0.441113	0.496094	0.55465	0.701583	0.784393	0.992188	1.1093	1.24023	1.36233	1.58827	2.00227	2.77325	12.4642
0	0.154602	0.248047	0.248047	0.345956	0.441883	0.496094	0.55465	0.701583	0.784393	0.992188	1.1093	1.24023	1.36615	1.58827	2.0066	2.77325	12.5943
0	0.154651	0.248047	0.248047	0.346223	0.441998	0.496094	0.55465	0.701583	0.784393	0.992188	1.1093	1.24023	1.36922	1.58827	2.0093	2.77325	12.6017
0	0.15553	0.248047	0.248047	0.34677	0.442613	0.496094	0.55465	0.701583	0.784393	0.992188	1.1093	1.24023	1.37003	1.58827	2.01111	2.77325	12.6334
0	0.155841	0.248047	0.248047	0.346837	0.443048	0.496094	0.55465	0.701583	0.784393	0.992188	1.1093	1.24023	1.37466	1.58827	2.01376	2.77325	12.8147
0	0.15601	0.248047	0.248047	0.347467	0.443262	0.496094	0.55465	0.701583	0.784393	0.992188	1.1093	1.24023	1.37684	1.58827	2.02084	2.77325	12.8984
0	0.156172	0.248047	0.248047	0.347623	0.443358	0.496094	0.55465	0.701583	0.784393	0.992188	1.1093	1.24023	1.37738	1.58827	2.02427	2.77325	12.9793
0	0.156259	0.248047	0.248047	0.347923	0.443668	0.496094	0.55465	0.701583	0.784393	0.992188	1.1093	1.24023	1.37986	1.58827	2.03351	2.77325	13.0502
0	0.156302	0.248047	0.248047	0.348559	0.443816	0.496094	0.55465	0.701987	0.784393	0.992188	1.1093	1.24023	1.38068	1.58827	2.04545	2.77325	13.2049
0	0.15664	0.248047	0.248047	0.348956	0.444345	0.496094	0.55465	0.703055	0.784393	0.992188	1.1093	1.24023	1.38338	1.58827	2.04545	2.77325	13.2049
0	0.157018	0.248047	0.248047	0.349266	0.445672	0.496094	0.55465	0.703078	0.784393	0.992188	1.1093	1.24023	1.38381	1.59235	2.04545	2.77325	13.249
0	0.157063	0.248047	0.248047	0.34929	0.445685	0.496094	0.55465	0.703336	0.784393	0.992188	1.1093	1.24023	1.38455	1.59645	2.04545	2.77325	13.2954
0	0.157435	0.248047	0.248047	0.349339	0.44575	0.496094	0.55465	0.704346	0.784393	0.992188	1.1093	1.24023	1.38476	1.59821	2.04545	2.77325	13.5702
0	0.15747	0.248047	0.248047	0.350791	0.446227	0.496094	0.55465	0.705259	0.784393	0.992188	1.1093	1.24023	1.38487	1.60222	2.04545	2.77325	13.6223
0	0.158018	0.248047	0.248047	0.350791	0.447542	0.496094	0.55465	0.707521	0.784393	0.992188	1.1093	1.24023	1.38641	1.60479	2.04545	2.77325	13.8307
0	0.158118	0.248047	0.248047	0.350791	0.44798	0.496094	0.55465	0.708169	0.784393	0.992188	1.11281	1.24023	1.38925	1.60489	2.04545	2.77325	13.8418
0	0.158274	0.248047	0.248047	0.350791	0.448059	0.496094	0.55465	0.710091	0.784393	0.992188	1.11418	1.24023	1.38953	1.60761	2.04545	2.77325	13.9105
0	0.158353	0.248047	0.248047	0.350791	0.448322	0.496094	0.55465	0.710471	0.784393	0.992188	1.1156	1.24023	1.38978	1.60812	2.04545	2.77325	13.9105
0	0.158787	0.248047	0.248047	0.350791	0.448515	0.496094	0.55465	0.711666	0.784393	0.992188	1.1163	1.24023	1.39058	1.6123	2.04545	2.77325	13.9105
0	0.15898	0.248047	0.248047	0.350791	0.45033	0.496094	0.555313	0.712625	0.784393	0.992188	1.12212	1.24023	1.39711	1.61559	2.04545	2.77325	14.1038
0	0.158988	0.248047	0.248047	0.350791	0.4517	0.496094	0.555679	0.712931	0.784393	0.992188	1.1222	1.24023	1.39839	1.61887	2.04545	2.77325	14.1408
0	0.159001	0.248047	0.248047	0.350791	0.451936	0.496094	0.556115	0.715667	0.784393	0.992188	1.12445	1.24023	1.39857	1.62399	2.05248	2.77325	14.1474
0	0.159431	0.248047	0.248047	0.350791	0.453606	0.496094	0.557337	0.716533	0.784393	0.992188	1.12472	1.24023	1.39989	1.63685	2.05921	2.77325	14.3867
0	0.159608	0.248047	0.248047	0.350791	0.454	0.496094	0.557956	0.716969	0.784393	0.992188	1.12478	1.24023	1.40147	1.63825	2.07377	2.77325	14.489
0	0.15964	0.248047	0.248047	0.350791	0.454542	0.496094	0.5584	0.717075	0.784393	0.992188	1.12527	1.24023	1.40317	1.64111	2.0855	2.77325	14.5589
0	0.159746	0.248047	0.248047	0.350791	0.455176	0.496094	0.558605	0.717083	0.784393	0.992188	1.12603	1.24023	1.40317	1.64237	2.09269	2.77325	14.5842
0	0.159758	0.248047	0.248047	0.350791	0.456104	0.496094	0.56047	0.717381	0.784393	0.992188	1.12704	1.24023	1.40317	1.64689	2.09905	2.77325	14.6032
0	0.159874	0.248047	0.248047	0.350791	0.457028	0.496094	0.561195	0.71945	0.784393	0.992188	1.12848	1.24023	1.40317	1.66395	2.10475	2.77325	14.6432
0	0.160359	0.248047	0.248047	0.350791	0.457706	0.496094	0.561931	0.721548	0.784393	0.992188	1.12946	1.24023	1.40317	1.66395	2.10475	2.77325	14.8911
0	0.160539	0.248047	0.248047	0.350791	0.457734	0.496094	0.562518	0.721607	0.784393	0.992188	1.12962	1.24023	1.40317	1.66395	2.10475	2.77325	15.0901
0	0.160604	0.248047	0.248047	0.350791	0.458256	0.496094	0.563011	0.722215	0.784393	0.992188	1.13399	1.24023	1.40317	1.66395	2.10746	2.77325	15.1003
0	0.161084	0.248047	0.248047	0.350791	0.458401	0.496094	0.565964	0.722311	0.784393	0.992188	1.13415	1.24023	1.40317	1.66395	2.10823	2.77325	15.2039
0	0.161169	0.248047	0.248047	0.350791	0.45967	0.496094	0.567328	0.724107	0.784393	0.992188	1.13991	1.24023	1.40317	1.66395	2.11931	2.77325	15.2846
0	0.161604	0.248047	0.248047	0.350791	0.460865	0.496094	0.568729	0.725077	0.784393	0.992188	1.14204	1.24023	1.40317	1.66395	2.11931	2.77325	15.3429
0	0.161675	0.248047	0.248047	0.350791	0.461469	0.496094	0.570173	0.725192	0.784393	0.992188	1.14455	1.24023	1.40317	1.66395	2.11931	2.77325	15.4109
0	0.161733	0.248047	0.248047	0.350791	0.461642	0.496094	0.570791	0.7254	0.784393	0.992188	1.14556	1.24023	1.40317	1.66395	2.11931	2.78169	15.6289
0	0.161803	0.248047	0.248047	0.350791	0.462738	0.496094	0.57137	0.725648	0.784393	0.992188	1.14594	1.24058	1.40317	1.66395	2.11931	2.7843	15.906
0	0.161864	0.248047	0.248047	0.350791	0.463148	0.496094	0.572221	0.727615	0.784393	0.992188	1.14747	1.24288	1.40317	1.66395	2.12258	2.80633	16.0331
0	0.161988	0.248047	0.248047	0.350791	0.463662	0.496094	0.573424	0.727707	0.784393	0.992188	1.14889	1.24297	1.40317	1.66395	2.12896	2.80633	16.0772
0	0.162085	0.248047	0.248047	0.350791	0.465428	0.496094	0.573448	0.728596	0.784393	0.992188	1.15221	1.24389	1.40317	1.66395	2.13257	2.81064	16.1707
0	0.163177	0.248047	0.248047	0.350791	0.466045	0.496094	0.573584	0.728602	0.784393	0.992188	1.1526	1.24452	1.40562	1.66395	2.13378	2.81801	16.1973
0	0.163336	0.248047	0.248047	0.350791	0.466363	0.496094	0.57477	0.728846	0.784393	0.992188	1.15346	1.24521	1.40653	1.66395	2.13378	2.82817	16.3052
0	0.163654	0.248047	0.248047	0.350791	0.466487	0.496094	0.575115	0.729432	0.784393	0.992188	1.15364	1.24526	1.41145	1.66395	2.13378	2.82817	16.3127
0	0.163696	0.248047	0.248047	0.350791	0.466621	0.496094	0.575649	0.731416	0.784393	0.992188	1.15677	1.24662	1.41156	1.66395	2.13378	2.82817	16.4255
0	0.163961	0.248047	0.248047	0.350791	0.467765	0.496094	0.575704	0.731595	0.784393	0.992188	1.1578	1.25098	1.41511	1.66584	2.13378	2.82817	16.4311
0	0.164045	0.248047	0.248047	0.350791	0.467787	0.496094	0.575962	0.733451	0.784393	0.992188	1.15908	1.25161	1.41651	1.66921	2.13378	2.82817	16.5021
0	0.164341	0.248047	0.248047	0.350791	0.470277	0.496094	0.576249	0.734094	0.784393	0.992188	1.16136	1.25339	1.41932	1.67397	2.13378	2.82817	16.5468
0	0.164416	0.248047	0.248047	0.350791	0.470317	0.496094	0.577728	0.734329	0.784393	0.992188	1.162	1.25485	1.42057	1.68187	2.13378	2.82817	16.5914
0	0.164574	0.248047	0.248047	0.350791	0.471369	0.496094	0.578136	0.735059	0.784393	0.992188	1.16226	1.25487	1.42587	1.69185	2.13378	2.82817	16.5914
0	0.164736	0.248047	0.248047	0.350791	0.471733	0.496094	0.580104	0.735428	0.784575	0.992188	1.16344	1.25596	1.42776	1.69483	2.13378	2.82817	16.9327
0	0.16488	0.248047	0.248047	0.350791	0.471867	0.496094	0.580141	0.735585	0.784729	0.992188	1.16516	1.25762	1.43167	1.69575	2.13378	2.82817	17.2727
0	0.165208	0.248047	0.248047	0.350791	0.472294	0.496094	0.580444	0.738415	0.787333	0.992188	1.16684	1.25767	1.43466	1.69741	2.13378	2.86838	17.2745
0	0.165447	0.248047	0.248047	0.350791	0.472557	0.496094	0.58215	0.738628	0.789284	0.992188	1.16693	1.25899	1.43483	1.69756	2.13378	2.8927	17.2745
0	0.165725	0.248047	0.248047	0.350791	0.472779	0.496094	0.582454	0.73867	0.789433	0.992188	1.16746	1.25958	1.43644	1.70722	2.13378	2.8927	17.3278
0	0.165798	0.248047	0.248047	0.350791	0.47339	0.496094	0.584178	0.739799	0.789607	0.992188	1.16841	1.26219	1.4388	1.70803	2.13378	2.8927	17.471
0	0.165802	0.248047	0.248047	0.350791	0.474216	0.496094	0.584203	0.740503	0.789947	0.992188	1.16901	1.26288	1.44635	1.70803	2.13378	2.8927	17.6169
0	0.166029	0.248047	0.248047	0.350791	0.475628	0.496094	0.5848	0.74076	0.791207	0.992188	1.16908	1.26469	1.44635	1.71201	2.13378	2.8927	17.6183
0	0.166323	0.248047	0.248047	0.350791	0.476529	0.496094	0.58529	0.741058	0.792751	0.992188	1.16917	1.2648	1.44635	1.73296	2.13378	2.8927	17.6602
0	0.166987	0.248047	0.248047	0.350791	0.477259	0.496094	0.585459	0.741059	0.793855	0.992188	1.16959	1.2648	1.44635	1.73394	2.13378	2.8927	17.7678
0	0.167693	0.248047	0.248047	0.350791	0.478536	0.496094	0.58576	0.741336	0.795162	0.992188	1.17018	1.2648	1.44635	1.73459	2.13378	2.89675	17.868
0	0.167835	0.248047	0.248047	0.350791	0.478689	0.496094	0.587169	0.742016	0.795994	0.992188	1.17028	1.2648	1.44635	1.73633	2.13378	2.90331	17.8869
0	0.167886	0.248047	0.248047	0.350791	0.478787	0.496094	0.587672	0.742746	0.79648	0.992188	1.17029	1.2648	1.44635	1.73633	2.13378	2.90331	17.9093
0	0.16819	0.248047	0.248047	0.350791	0.479273	0.496094	0.58815	0.742933	0.796852	0.992188	1.17152	1.2648	1.44635	1.73633	2.13378	2.90331	17.9416
0	0.168191	0.248047	0.248047	0.350791	0.480191	0.496094	0.588244	0.743196	0.801777	0.992188	1.17208	1.2648	1.44635	1.73633	2.13378	2.90331	18.1685
0	0.168289	0.248047	0.248047	0.350791	0.480652	0.496094	0.588865	0.743212	0.803512	0.992188	1.17231	1.2648	1.44635	1.73633	2.13378	2.90331	18.2577
0	0.168563	0.248047	0.248047	0.350791	0.48129	0.496094	0.589477	0.743283	0.804461	0.992188	1.17265	1.2648	1.44635	1.73633	2.13378	2.92185	18.3118
0	0.169536	0.248047	0.248047	0.350791	0.481462	0.496094	0.590947	0.744141	0.804858	0.992188	1.17676	1.2648	1.44635	1.73633	2.13378	2.94381	18.4374
0	0.169758	0.248047	0.248047	0.350791	0.481923	0.496094	0.591333	0.744141	0.805187	0.992188	1.17757	1.2648	1.44635	1.73633	2.13378	2.94908	18.5922
0	0.170263	0.248047	0.248047	0.350791	0.482672	0.496094	0.592827	0.744141	0.809399	0.992188	1.17797	1.2648	1.44635	1.73633	2.13378	2.95164	18.709
0	0.170626	0.248047	0.248047	0.350791	0.482854	0.496094	0.593028	0.744141	0.809511	0.992188	1.17945	1.2648	1.44635	1.73633	2.13378	2.96313	18.7534
0	0.170627	0.248047	0.248047	0.350791	0.483152	0.496094	0.593917	0.744141	0.809581	0.992188	1.1801	1.2648	1.44635	1.73633	2.13378	2.97656	18.7682
0	0.170848	0.248047	0.248047	0.350791	0.483243	0.496094	0.594411	0.744141	0.81112	0.992188	1.18155	1.2648	1.44635	1.73633	2.13378	2.97656	18.9544
0	0.171139	0.248047	0.248047	0.350791	0.48351	0.496094	0.594871	0.744141	0.81291	0.992188	1.18295	1.2648	1.44635	1.73633	2.13378	2.97656	18.9703
0	0.171375	0.248047	0.248047	0.350791	0.483685	0.496094	0.594991	0.744141	0.813357	0.992188	1.18405	1.2648	1.44635	1.73633	2.13537	2.97656	19.1677
0	0.171421	0.248047	0.248047	0.350791	0.484332	0.496094	0.595138	0.744141	0.81406	0.992188	1.18579	1.2648	1.44635	1.73633	2.13575	2.97656	19.3477
0	0.171456	0.248047	0.248047	0.350791	0.485731	0.496094	0.596069	0.744141	0.814373	0.992188	1.18862	1.2648	1.44635	1.74232	2.13891	2.97656	19.4697
0	0.171648	0.248047	0.248047	0.350791	0.487216	0.496094	0.596465	0.744141	0.814573	0.992188	1.18865	1.2648	1.44635	1.74298	2.1447	2.97916	19.5391
0	0.172609	0.248047	0.248047	0.350791	0.487453	0.496094	0.596471	0.744141	0.815127	0.992188	1.19066	1.2648	1.44635	1.74516	2.14508	2.98268	19.6396
0	0.172716	0.248047	0.248047	0.350791	0.488737	0.496094	0.596483	0.744141	0.815697	0.992188	1.19163	1.2648	1.44635	1.74521	2.15311	2.98688	19.6725
0	0.173236	0.248047	0.248047	0.350791	0.489517	0.496094	0.597466	0.744141	0.816398	0.992188	1.19284	1.2648	1.44635	1.74731	2.15732	2.98688	19.6959
0	0.173488	0.248047	0.248047	0.350791	0.491323	0.496094	0.598391	0.744141	0.81822	0.992188	1.19464	1.2648	1.44635	1.74735	2.15742	2.98688	20.0811
0	0.173683	0.248047	0.248047	0.350791	0.49152	0.496094	0.598428	0.744141	0.820545	0.992188	1.19635	1.2648	1.44635	1.74965	2.16274	2.98688	20.1667
0	0.173708	0.248047	0.248047	0.350791	0.492724	0.496094	0.598666	0.744141	0.820801	0.992188	1.19652	1.2648	1.44635	1.75396	2.16823	2.98688	20.504
0	0.173772	0.248047	0.248047	0.350791	0.492934	0.496094	0.59891	0.744141	0.820837	0.992188	1.19956	1.2648	1.44635	1.75396	2.16919	2.98688	20.8034
0	0.173897	0.248047	0.248047	0.350791	0.493323	0.496094	0.601008	0.744141	0.822871	0.992188	1.20213	1.2648	1.44635	1.75396	2.16974	2.98688	20.8389
0	0.174035	0.248047	0.248047	0.350791	0.493552	0.496094	0.604529	0.744141	0.823483	0.992188	1.20532	1.2648	1.44635	1.75396	2.17145	2.98688	21.0504
0	0.174072	0.248047	0.248047	0.350791	0.494088	0.496094	0.605077	0.744141	0.824807	0.992188	1.20551	1.2648	1.44635	1.75396	2.17922	2.98688	21.3089
0	0.174075	0.248047	0.248047	0.350791	0.495071	0.496094	0.605684	0.744141	0.82514	0.992188	1.20741	1.2648	1.44635	1.75396	2.18827	2.99716	21.4327
0	0.174253	0.248047	0.248047	0.350791	0.495427	0.496094	0.606081	0.744141	0.827046	0.992188	1.2079	1.2648	1.44635	1.75396	2.19001	2.99716	21.6029
0	0.174383	0.248047	0.248047	0.350791	0.495825	0.496094	0.606304	0.744141	0.827177	0.992188	1.21425	1.2648	1.44635	1.75396	2.19609	2.99716	22.222
0	0.174535	0.248047	0.248047	0.350791	0.496094	0.496094	0.607864	0.744141	0.829836	0.992188	1.21705	1.2648	1.44635	1.75396	2.20139	2.99716	22.3242
0	0.174598	0.248047	0.248047	0.350791	0.496094	0.496094	0.607916	0.744141	0.832627	0.992188	1.21843	1.2648	1.44635	1.75396	2.20217	2.99716	22.6756
0	0.174804	0.248047	0.248047	0.350791	0.496094	0.496094	0.608636	0.744141	0.833177	0.992188	1.21962	1.2648	1.44635	1.75396	2.20226	2.99854	22.8903
0	0.175156	0.248047	0.248047	0.350791	0.496094	0.496094	0.609525	0.744141	0.833577	0.992188	1.22007	1.2648	1.44635	1.75396	2.20334	3.01762	23.1761
0	0.175178	0.248047	0.248047	0.350791	0.496094	0.496094	0.610246	0.744141	0.835904	0.992188	1.22035	1.2648	1.44635	1.75396	2.21768	3.01762	23.3546
0	0.175226	0.248047	0.248047	0.350791	0.496094	0.496094	0.610507	0.744141	0.83625	0.992188	1.22181	1.2648	1.44635	1.75396	2.2186	3.0278	23.5383
0	0.175285	0.248047	0.248047	0.350791	0.496094	0.496094	0.610596	0.744141	0.837247	0.992547	1.23309	1.2648	1.44635	1.75396	2.2186	3.0278	23.7517
0	0.175566	0.248047	0.248047	0.350791	0.496094	0.496094	0.610653	0.744141	0.838148	0.992954	1.23402	1.2648	1.44635	1.75396	2.2186	3.0278	23.9529
0	0.175835	0.248047	0.248047	0.350791	0.496094	0.496094	0.611488	0.744141	0.843189	0.993416	1.23873	1.2648	1.44635	1.75396	2.2186	3.0278	24.0848
0	0.175889	0.248047	0.248047	0.350791	0.496094	0.496094	0.612074	0.744141	0.843746	0.997884	1.24023	1.2648	1.44635	1.75396	2.2186	3.05744	24.3099
0	0.176728	0.248047	0.248047	0.350791	0.496094	0.496094	0.613084	0.744141	0.84396	0.999448	1.24023	1.2648	1.44635	1.75396	2.2186	3.10802	24.3099
0	0.176733	0.248047	0.248047	0.350791	0.496094	0.496094	0.613403	0.744141	0.844242	0.999872	1.24023	1.2648	1.44635	1.75396	2.2186	3.10802	24.4273
0	0.176991	0.248047	0.248047	0.350791	0.496094	0.496094	0.613535	0.744141	0.844817	1.00038	1.24023	1.2648	1.44635	1.75396	2.2186	3.13757	24.5002
0	0.177434	0.248047	0.248047	0.350791	0.496094	0.496684	0.613614	0.744141	0.845059	1.00089	1.24023	1.2648	1.44635	1.75396	2.2186	3.15712	24.544
0	0.177882	0.248047	0.248047	0.350791	0.496094	0.497636	0.614398	0.744141	0.845265	1.00122	1.24023	1.2648	1.44635	1.75396	2.2186	3.17655	24.5654
0	0.178081	0.248047	0.248047	0.350791	0.496094	0.497648	0.614797	0.744141	0.848257	1.00236	1.24023	1.2648	1.44635	1.75396	2.22307	3.17655	24.8641
0	0.178865	0.248047	0.248047	0.350791	0.496094	0.498457	0.616273	0.744141	0.848447	1.00303	1.24023	1.2648	1.44635	1.75396	2.23242	3.17655	24.8654
0	0.179199	0.248047	0.248047	0.350791	0.496094	0.499269	0.616649	0.744141	0.848895	1.00335	1.24023	1.2648	1.44635	1.75396	2.23242	3.17655	24.8753
0	0.179744	0.248047	0.248047	0.350791	0.496094	0.499694	0.617278	0.744141	0.849169	1.00369	1.24023	1.2648	1.44635	1.75396	2.23242	3.17655	25.0576
0	0.180095	0.248047	0.248047	0.350791	0.496094	0.50042	0.617308	0.744141	0.850563	1.00618	1.24023	1.2648	1.44635	1.75396	2.23242	3.19403	25.0711
0	0.180205	0.248047	0.248047	0.351435	0.496094	0.500878	0.618387	0.744141	0.851075	1.00915	1.24023	1.2648	1.44635	1.75396	2.23242	3.22461	25.1006
0	0.180542	0.248047	0.248047	0.351742	0.496094	0.501234	0.618927	0.744141	0.851241	1.00969	1.24023	1.2648	1.44635	1.75396	2.23242	3.22461	25.1813
0	0.180612	0.248047	0.248047	0.352358	0.496094	0.503806	0.619121	0.744141	0.854233	1.01072	1.24023	1.2648	1.44635	1.75396	2.23287	3.22461	25.2228
0	0.180625	0.248047	0.248047	0.352601	0.496094	0.503903	0.619514	0.744141	0.854483	1.01189	1.24023	1.2648	1.44635	1.75396	2.23583	3.22461	25.2789
0	0.180895	0.248047	0.248047	0.352659	0.496094	0.50518	0.619927	0.744141	0.855681	1.0135	1.24023	1.2648	1.44635	1.75396	2.24413	3.22461	25.3008
0	0.181246	0.248047	0.248047	0.352982	0.496094	0.507554	0.620015	0.744141	0.856507	1.01382	1.24023	1.2648	1.44635	1.75396	2.24616	3.22461	25.4039
0	0.181699	0.248047	0.248047	0.352986	0.496094	0.507605	0.6201	0.744141	0.856609	1.01395	1.24023	1.2648	1.44635	1.75396	2.24616	3.23414	25.4681
0	0.181715	0.248047	0.248047	0.353279	0.496094	0.508091	0.62032	0.744141	0.856948	1.01544	1.24023	1.2648	1.44635	1.75396	2.24616	3.23414	25.5199
0	0.181727	0.248047	0.248047	0.354445	0.496094	0.509049	0.620678	0.744141	0.857369	1.01545	1.24023	1.2648	1.44635	1.75396	2.24616	3.23414	25.5673
0	0.181962	0.248047	0.248047	0.355509	0.496094	0.509049	0.62178	0.744141	0.857919	1.01564	1.24023	1.2648	1.44635	1.75396	2.24616	3.23414	25.6366
0	0.181994	0.248047	0.248047	0.35633	0.496094	0.509538	0.622838	0.744141	0.858003	1.01723	1.24023	1.2648	1.44635	1.75396	2.24616	3.23414	25.7826
0	0.182097	0.248047	0.248047	0.357932	0.496094	0.510593	0.623367	0.744141	0.858886	1.01841	1.24023	1.2648	1.44635	1.75396	2.24616	3.23414	25.9596
0	0.182268	0.248047	0.248174	0.358205	0.496094	0.510781	0.623512	0.744141	0.859708	1.01903	1.24023	1.2648	1.44635	1.75396	2.24616	3.23414	25.9692
0	0.182477	0.248047	0.248751	0.358348	0.496094	0.511079	0.624652	0.744141	0.86175	1.02038	1.24023	1.2648	1.44635	1.75396	2.24616	3.28268	26.0921
0	0.182961	0.248047	0.248869	0.358402	0.496094	0.512008	0.625575	0.744141	0.862825	1.02063	1.24023	1.2648	1.44635	1.75396	2.24616	3.30936	26.0921
0	0.183419	0.248047	0.249136	0.359569	0.496094	0.513117	0.626418	0.744141	0.862888	1.02163	1.24023	1.2648	1.44635	1.75396	2.24922	3.30936	26.1204
0	0.183984	0.248047	0.249224	0.359646	0.496094	0.513417	0.628007	0.744141	0.865363	1.02229	1.24023	1.2648	1.45118	1.75396	2.25402	3.3279	26.1487
0	0.184109	0.248047	0.249961	0.359867	0.496094	0.514389	0.629414	0.744141	0.865681	1.02272	1.24023	1.2648	1.46284	1.75396	2.25449	3.33713	26.2221
0	0.184115	0.248047	0.251433	0.361104	0.496094	0.514396	0.629442	0.744141	0.866688	1.02272	1.24023	1.2648	1.46374	1.75396	2.25634	3.33713	26.4771
0	0.184963	0.248047	0.252498	0.361417	0.496094	0.514462	0.630216	0.744141	0.866771	1.02272	1.24023	1.2648	1.46424	1.75396	2.26082	3.33713	26.5132
0	0.185007	0.248047	0.252547	0.361844	0.496094	0.515865	0.630288	0.744141	0.870747	1.02272	1.24023	1.2648	1.46633	1.75396	2.26088	3.33713	26.5167
0	0.185744	0.248047	0.254442	0.362135	0.496094	0.516004	0.63039	0.744141	0.871044	1.02272	1.24023	1.2648	1.46707	1.75396	2.26529	3.33713	26.629
0	0.185789	0.248047	0.255069	0.362298	0.496094	0.517199	0.631839	0.744141	0.87131	1.02272	1.24023	1.2648	1.46896	1.75396	2.26927	3.33713	26.8178
0	0.185964	0.248047	0.255113	0.362363	0.496094	0.517717	0.631934	0.744141	0.871709	1.02272	1.24023	1.2648	1.47024	1.75396	2.27043	3.33713	27.02
0	0.1868	0.248047	0.255698	0.363353	0.496094	0.517981	0.631987	0.744141	0.872683	1.02272	1.24023	1.2648	1.47471	1.75396	2.27355	3.33713	27.0871
0	0.186819	0.248047	0.256544	0.363886	0.496094	0.519098	0.634829	0.744141	0.872799	1.02272	1.24023	1.2648	1.47573	1.75396	2.28523	3.33713	27.1315
0	0.187398	0.248047	0.257751	0.364342	0.496094	0.519836	0.636634	0.744141	0.873584	1.02272	1.24023	1.2648	1.47778	1.75396	2.28688	3.33713	27.1973
0	0.187578	0.248047	0.258028	0.364604	0.496094	0.520905	0.637607	0.744141	0.873606	1.02272	1.24023	1.2648	1.48276	1.75396	2.28688	3.33713	27.2005
0	0.187706	0.248047	0.258095	0.36547	0.496094	0.521968	0.638735	0.744141	0.875625	1.02272	1.24023	1.2648	1.48449	1.75396	2.28688	3.33713	27.2186
0	0.188466	0.248047	0.258811	0.366085	0.496094	0.523456	0.639191	0.744141	0.877016	1.02272	1.24023	1.2648	1.48828	1.75396	2.28688	3.3738	27.2287
0	0.188651	0.248047	0.259264	0.366365	0.496094	0.523732	0.639502	0.744141	0.879865	1.02272	1.24023	1.2648	1.48828	1.75396	2.28688	3.3738	27.2321
0	0.188991	0.248047	0.259296	0.367817	0.496094	0.523984	0.640134	0.744141	0.882154	1.02272	1.24023	1.2648	1.48828	1.75396	2.28688	3.3738	27.2908
0	0.189015	0.248047	0.259501	0.367906	0.496094	0.524195	0.640696	0.744141	0.882891	1.02272	1.24023	1.2648	1.48828	1.75396	2.28688	3.3738	27.319
0	0.189262	0.248047	0.259601	0.368345	0.496094	0.524314	0.640949	0.744141	0.88371	1.02272	1.24023	1.2648	1.48828	1.75396	2.28688	3.3738	27.5511
0	0.189435	0.248047	0.259641	0.369167	0.496094	0.525302	0.641876	0.744141	0.88379	1.02272	1.24023	1.2648	1.48828	1.75396	2.28688	3.3738	27.6146
0	0.189524	0.248047	0.259753	0.369202	0.496094	0.525731	0.642418	0.744141	0.884418	1.02272	1.24023	1.2648	1.48828	1.75396	2.28688	3.3739	27.8542
0	0.190048	0.248047	0.260052	0.369897	0.496094	0.527669	0.642443	0.744141	0.885184	1.02272	1.24023	1.2648	1.48828	1.75396	2.28688	3.39284	27.9403
0	0.190153	0.248047	0.261628	0.370019	0.496094	0.528331	0.642789	0.744141	0.886839	1.02272	1.24023	1.2648	1.48828	1.75396	2.28688	3.44598	28.0042
0	0.190303	0.248047	0.261678	0.370297	0.496094	0.529031	0.644269	0.744141	0.887081	1.02272	1.24023	1.2648	1.48828	1.75396	2.28688	3.44598	28.0655
0	0.190327	0.248047	0.263315	0.371067	0.496094	0.529835	0.644339	0.744141	0.888647	1.02272	1.24023	1.2648	1.48828	1.75396	2.28688	3.45489	28.4336
0	0.190516	0.248047	0.263687	0.371263	0.496094	0.53031	0.644958	0.744141	0.890763	1.02272	1.24023	1.2648	1.48828	1.75396	2.28688	3.47266	28.5168
0	0.190822	0.248047	0.263795	0.371461	0.496094	0.530327	0.645885	0.744141	0.891105	1.02272	1.24023	1.2648	1.48828	1.75396	2.28688	3.47266	28.5545
0	0.191368	0.248047	0.263983	0.371802	0.496094	0.531222	0.649661	0.744141	0.891887	1.02272	1.24023	1.2648	1.48828	1.75396	2.28688	3.47266	28.734
0	0.191763	0.248047	0.264071	0.372382	0.496094	0.531948	0.651029	0.744141	0.894346	1.02272	1.24023	1.2648	1.48828	1.75396	2.28688	3.47266	28.7991
0	0.191796	0.248047	0.264231	0.372484	0.496094	0.532014	0.651745	0.744141	0.894346	1.02272	1.24023	1.2648	1.48828	1.75396	2.28688	3.47266	29.1685
0	0.192033	0.248047	0.264384	0.375058	0.496094	0.533505	0.65247	0.744141	0.894346	1.02272	1.24023	1.2648	1.48828	1.75396	2.2952	3.4815	29.3629
0	0.192201	0.248047	0.265133	0.375648	0.496094	0.533767	0.653904	0.744141	0.894346	1.02272	1.24023	1.2648	1.48828	1.75396	2.29889	3.4815	29.6538
0	0.192314	0.248047	0.265683	0.376528	0.496094	0.536273	0.653975	0.744141	0.894346	1.02272	1.24023	1.2648	1.48828	1.75396	2.30282	3.4815	29.8482
0	0.192414	0.248047	0.266147	0.377013	0.496094	0.537199	0.654973	0.744141	0.894346	1.02272	1.24023	1.2648	1.48828	1.75396	2.30545	3.4815	30.0639
0	0.192832	0.248047	0.266415	0.377532	0.496094	0.538923	0.655779	0.744141	0.894346	1.02272	1.24023	1.2648	1.48828	1.75396	2.30694	3.50791	30.0659
0	0.192881	0.248047	0.266451	0.377955	0.496094	0.540213	0.656513	0.744141	0.894346	1.02272	1.24023	1.2648	1.48828	1.75396	2.31207	3.50791	30.2175
0	0.193189	0.248047	0.266461	0.378016	0.496094	0.542269	0.656803	0.744141	0.894346	1.02272	1.24023	1.2648	1.48828	1.75396	2.31234	3.50791	30.3683
0	0.193193	0.248047	0.266658	0.378035	0.496094	0.54243	0.657039	0.744141	0.894346	1.02272	1.24023	1.2648	1.48828	1.76408	2.31484	3.50791	30.5188
0	0.193219	0.248047	0.269139	0.379827	0.496094	0.542972	0.65764	0.744141	0.894346	1.02272	1.24023	1.2648	1.48828	1.76488	2.31603	3.50791	30.7428
0	0.193457	0.248047	0.269441	0.379954	0.496094	0.543112	0.658016	0.744141	0.894346	1.02272	1.24023	1.2648	1.48828	1.76799	2.31643	3.50791	30.8696
0	0.193539	0.248047	0.269714	0.380838	0.496094	0.543403	0.658047	0.744141	0.894346	1.02272	1.24023	1.26635	1.48828	1.77641	2.3204	3.50791	30.8955
0	0.193878	0.248047	0.269753	0.381495	0.496094	0.543894	0.658579	0.744141	0.894346	1.02272	1.24023	1.26875	1.48828	1.77889	2.32129	3.50791	31.0851
0	0.193926	0.248047	0.270719	0.381543	0.496094	0.545005	0.661096	0.744141	0.894346	1.02272	1.24023	1.26924	1.49117	1.78869	2.32305	3.50791	31.2382
0	0.195318	0.248047	0.270741	0.382704	0.496094	0.545541	0.661712	0.744141	0.894346	1.02272	1.24023	1.2708	1.49433	1.78869	2.32424	3.50791	31.2824
0	0.195351	0.248047	0.27136	0.383323	0.496094	0.545855	0.661742	0.744141	0.894346	1.02272	1.24023	1.27272	1.4975	1.78869	2.3261	3.50791	31.5059
0	0.195452	0.248047	0.27161	0.383534	0.496094	0.547085	0.661748	0.744141	0.894346	1.02272	1.24023	1.27986	1.49819	1.78869	2.32779	3.50791	31.7703
0	0.196252	0.248047	0.272086	0.383686	0.496094	0.547813	0.662294	0.744141	0.894346	1.02272	1.24023	1.28006	1.49847	1.78869	2.32983	3.50791	31.7742
0	0.196385	0.248047	0.272737	0.383816	0.496094	0.54888	0.663196	0.744141	0.894346	1.02272	1.24023	1.28153	1.50123	1.78869	2.33376	3.50791	31.8525
0	0.196537	0.248047	0.273181	0.384453	0.496094	0.549345	0.66355	0.744141	0.894346	1.02272	1.24023	1.28479	1.50276	1.78869	2.3346	3.50791	32.049
0	0.196964	0.248047	0.273191	0.38476	0.496094	0.549495	0.663826	0.744141	0.894346	1.02272	1.24023	1.28614	1.50379	1.78869	2.33602	3.50791	32.1065
0	0.197261	0.248047	0.273328	0.384972	0.496094	0.550428	0.664597	0.744141	0.894346	1.02272	1.24023	1.28658	1.50881	1.78869	2.33983	3.50791	32.4714
0	0.197914	0.248047	0.274558	0.38524	0.496094	0.550726	0.664836	0.744141	0.894346	1.02272	1.24023	1.28782	1.50881	1.78869	2.34007	3.52541	32.5481
0	0.197998	0.248047	0.274632	0.386224	0.496094	0.551439	0.664947	0.744141	0.894346	1.02272	1.24023	1.28847	1.50881	1.78869	2.34007	3.52541	32.7572
0	0.198112	0.248047	0.275073	0.38666	0.496094	0.551904	0.66662	0.744141	0.894346	1.02272	1.24023	1.28994	1.50881	1.78869	2.34007	3.52541	32.8369
0	0.198676	0.248047	0.275185	0.38679	0.496094	0.552431	0.666729	0.744141	0.894346	1.02272	1.24023	1.29553	1.50881	1.78869	2.34007	3.52541	32.8781
0	0.198993	0.248047	0.27524	0.387375	0.496094	0.552595	0.668401	0.744141	0.894346	1.02272	1.24023	1.29606	1.50881	1.78869	2.34007	3.55149	33.0387
0	0.199087	0.248047	0.27593	0.387398	0.496094	0.553155	0.669938	0.744141	0.894346	1.02272	1.24023	1.29875	1.50881	1.78869	2.34007	3.57738	33.5093
0	0.199121	0.248047	0.276361	0.387713	0.496094	0.553847	0.67069	0.744141	0.894346	1.02272	1.24023	1.30016	1.50881	1.78869	2.34007	3.66237	33.5377
0	0.199534	0.248047	0.276362	0.387909	0.496094	0.55465	0.672532	0.744141	0.894346	1.02272	1.24023	1.30187	1.50881	1.78869	2.34007	3.66237	33.6659
0	0.199733	0.248047	0.276637	0.387967	0.496094	0.55465	0.673004	0.744141	0.894346	1.02515	1.24023	1.30192	1.50881	1.78869	2.34007	3.66237	33.8033
0	0.199776	0.248047	0.277531	0.388033	0.496094	0.55465	0.674755	0.744141	0.894346	1.02651	1.24023	1.30296	1.50881	1.78869	2.34007	3.68748	33.9833
0	0.200028	0.248047	0.277819	0.38807	0.496094	0.55465	0.675114	0.744141	0.894346	1.02723	1.24023	1.3035	1.50881	1.78869	2.34007	3.68748	34.0512
0	0.20017	0.248047	0.279112	0.3882	0.496094	0.55465	0.675329	0.744141	0.894346	1.02812	1.24023	1.30379	1.50881	1.78869	2.34007	3.68748	34.2781
0	0.200459	0.248047	0.279276	0.388322	0.496094	0.55465	0.675441	0.744141	0.894346	1.02911	1.24023	1.30726	1.50881	1.78869	2.34007	3.68748	34.3793
0	0.200497	0.248047	0.279451	0.38833	0.496094	0.55465	0.675579	0.744141	0.894346	1.03079	1.24023	1.3082	1.50881	1.78869	2.34007	3.68748	34.4651
0	0.201086	0.248047	0.27995	0.388684	0.496094	0.55465	0.677149	0.744141	0.894346	1.03275	1.24023	1.30833	1.50881	1.79175	2.34007	3.68748	34.4865
0	0.201092	0.248047	0.280742	0.388738	0.496094	0.55465	0.678424	0.744141	0.894346	1.03471	1.24023	1.3123	1.50881	1.79927	2.34007	3.68748	34.5222
0	0.201459	0.248047	0.280896	0.389792	0.496094	0.55465	0.679931	0.744141	0.894346	1.03521	1.24023	1.32009	1.50881	1.79992	2.34007	3.68748	34.6343
0	0.201468	0.248047	0.280958	0.389834	0.496094	0.55465	0.680031	0.744141	0.894346	1.03803	1.24023	1.32577	1.50881	1.80581	2.34007	3.68748	34.7726
0	0.201717	0.248047	0.281581	0.39003	0.496094	0.55465	0.681706	0.744141	0.894346	1.03892	1.24023	1.32834	1.50881	1.80581	2.34007	3.68748	34.815
0	0.202072	0.248047	0.281861	0.390292	0.496094	0.55465	0.682789	0.744141	0.894346	1.03983	1.24023	1.32909	1.50881	1.80581	2.34007	3.7207	34.8415
0	0.202171	0.248047	0.281996	0.390668	0.496094	0.55465	0.685331	0.744141	0.894346	1.04041	1.24023	1.33007	1.50881	1.80581	2.34007	3.7207	34.8415
0	0.202516	0.248047	0.282364	0.391009	0.496094	0.55465	0.687532	0.744141	0.894346	1.04116	1.24023	1.33103	1.50881	1.80581	2.34007	3.7207	34.9042
0	0.202582	0.248047	0.28257	0.391209	0.496094	0.55465	0.688044	0.744141	0.894346	1.04139	1.24023	1.33176	1.50881	1.80581	2.34007	3.7207	34.9473
0	0.202845	0.248047	0.283522	0.391808	0.496094	0.55465	0.68818	0.744141	0.894346	1.04154	1.24023	1.33564	1.50881	1.80581	2.34233	3.72896	35.0791
0	0.202882	0.248047	0.284016	0.39211	0.496094	0.55465	0.688631	0.744141	0.894346	1.04475	1.24023	1.33577	1.50881	1.80581	2.34426	3.72896	35.2209
0	0.203282	0.248047	0.284422	0.392383	0.496094	0.55465	0.689969	0.744141	0.896813	1.04476	1.24023	1.33577	1.51304	1.80581	2.34465	3.72896	35.2654
0	0.203777	0.248047	0.28477	0.392591	0.496094	0.55465	0.690111	0.744141	0.897209	1.0449	1.24023	1.33577	1.51908	1.80581	2.35318	3.72896	35.3142
0	0.203868	0.248047	0.284786	0.393224	0.496094	0.55465	0.690979	0.744141	0.898482	1.04538	1.24023	1.33577	1.52192	1.80581	2.35318	3.72896	35.3743
0	0.203934	0.248047	0.284974	0.393242	0.496094	0.55465	0.69107	0.744141	0.899061	1.04687	1.24023	1.33577	1.52635	1.81877	2.35318	3.72896	35.4742
0	0.204169	0.248047	0.284974	0.39407	0.496094	0.55465	0.693398	0.744141	0.899547	1.04787	1.24023	1.33577	1.53463	1.82104	2.38131	3.77814	35.6919
0	0.204499	0.248047	0.285034	0.394378	0.496094	0.55465	0.693871	0.744141	0.900133	1.0479	1.24023	1.33577	1.53705	1.82259	2.38258	3.77814	35.7532
0	0.2046	0.248047	0.285263	0.394956	0.496094	0.55465	0.695704	0.744141	0.905016	1.0495	1.24023	1.33577	1.54053	1.8275	2.39392	3.77814	35.7609
0	0.205275	0.248047	0.285496	0.396031	0.496094	0.55465	0.697275	0.744141	0.907359	1.0499	1.24023	1.33577	1.54933	1.83922	2.39628	3.78627	35.7953
0	0.205311	0.248047	0.285497	0.396065	0.496094	0.55465	0.698112	0.744141	0.908214	1.05188	1.24023	1.33577	1.5516	1.85673	2.39715	3.78627	35.9771
0	0.20553	0.248047	0.285848	0.397565	0.496094	0.55465	0.698857	0.744141	0.910803	1.05229	1.24023	1.33577	1.55369	1.85802	2.39782	3.78627	36.1059
0	0.205665	0.248047	0.286365	0.397715	0.496094	0.55465	0.698915	0.744141	0.911886	1.05237	1.24023	1.33577	1.56115	1.8621	2.40053	3.79064	36.1587
0	0.206847	0.248047	0.286572	0.397773	0.496094	0.55465	0.698959	0.744141	0.915762	1.05237	1.24023	1.33577	1.56323	1.86311	2.40639	3.79439	36.3014
0	0.206968	0.248047	0.286711	0.398051	0.496094	0.55465	0.700161	0.744141	0.917884	1.05237	1.24023	1.33577	1.56505	1.87404	2.40694	3.79439	36.601
0	0.207584	0.248047	0.287313	0.398219	0.496094	0.55465	0.700313	0.744141	0.918533	1.05237	1.24023	1.33577	1.56586	1.87873	2.40775	3.85072	36.818
0	0.207765	0.248047	0.287642	0.398519	0.496094	0.55465	0.700848	0.744141	0.919048	1.05237	1.24023	1.33577	1.56879	1.88907	2.42254	3.85072	36.9457
0	0.208095	0.248047	0.287869	0.398669	0.496094	0.55465	0.701583	0.744141	0.919398	1.05237	1.24023	1.33577	1.56879	1.88907	2.42384	3.87462	37.0396
0	0.208185	0.248047	0.287954	0.398757	0.496094	0.55465	0.701583	0.744141	0.921082	1.05237	1.24023	1.33577	1.56879	1.88907	2.42544	3.87462	37.0861
0	0.208379	0.248047	0.288408	0.398914	0.496094	0.55465	0.701583	0.744141	0.921171	1.05237	1.24023	1.33577	1.56879	1.88907	2.43548	3.88255	37.1284
0	0.208411	0.248047	0.288626	0.400992	0.496094	0.55465	0.701583	0.744141	0.92143	1.05237	1.24023	1.33577	1.56879	1.88907	2.44298	3.88255	37.2277
0	0.20854	0.248047	0.289538	0.401958	0.496094	0.55465	0.701583	0.744141	0.921493	1.05237	1.24023	1.33577	1.56879	1.88907	2.44298	3.92197	37.2772
0	0.208667	0.248047	0.289615	0.402223	0.496094	0.55465	0.701583	0.744141	0.921914	1.05237	1.24023	1.33577	1.56879	1.88907	2.44298	3.92197	37.4214
0	0.208769	0.248047	0.291116	0.402321	0.496094	0.55465	0.701583	0.744425	0.922876	1.05237	1.24023	1.33577	1.56879	1.88907	2.44298	3.92197	37.4625
0	0.20877	0.248047	0.291543	0.402489	0.496094	0.55465	0.701583	0.744812	0.923049	1.05237	1.24023	1.33577	1.56879	1.88907	2.45554	3.92197	37.5404
0	0.209444	0.248047	0.292116	0.402863	0.496094	0.55465	0.701583	0.744858	0.924213	1.05237	1.24023	1.33577	1.56879	1.88907	2.45554	3.92197	37.6672
0	0.210097	0.248047	0.292884	0.403249	0.496094	0.55465	0.701583	0.748366	0.925115	1.05237	1.24023	1.33577	1.56879	1.88907	2.45554	3.92197	37.7235
0	0.21032	0.248047	0.29362	0.403471	0.496094	0.55465	0.701583	0.74963	0.926254	1.05237	1.24023	1.33577	1.56879	1.88907	2.45554	3.92197	37.7243
0	0.210368	0.248047	0.293774	0.403793	0.496094	0.55465	0.701583	0.750652	0.92713	1.05237	1.24023	1.33577	1.56879	1.88907	2.45554	3.92197	37.7814
0	0.210392	0.248047	0.294047	0.404126	0.496094	0.55465	0.701583	0.750704	0.927144	1.05237	1.24023	1.33577	1.56879	1.88907	2.46374	3.96875	37.8658
0	0.210696	0.248047	0.294408	0.404132	0.496094	0.55465	0.701583	0.751506	0.929061	1.05237	1.24023	1.33577	1.56879	1.88907	2.46888	4.00732	37.8895
0	0.21076	0.248047	0.295374	0.404536	0.496094	0.55465	0.701583	0.751995	0.93025	1.05237	1.24023	1.33577	1.56879	1.88907	2.47532	4.00732	38.0038
0	0.210865	0.248047	0.295559	0.405545	0.496094	0.55465	0.701583	0.752563	0.930928	1.05426	1.24023	1.33577	1.56879	1.88907	2.48047	4.00732	38.2065
0	0.210964	0.248047	0.295562	0.406725	0.496094	0.55465	0.701583	0.75295	0.935263	1.05583	1.24023	1.33577	1.56879	1.88907	2.48047	4.00732	38.307
0	0.211254	0.248047	0.296234	0.406955	0.496094	0.55465	0.701583	0.755876	0.935532	1.05863	1.24023	1.33577	1.56879	1.88907	2.48047	4.03791	38.3351
0	0.21134	0.248047	0.297017	0.407093	0.496094	0.55465	0.701583	0.75669	0.936511	1.05929	1.24023	1.33577	1.58412	1.89142	2.48047	4.06827	38.6651
0	0.211356	0.248047	0.297145	0.407134	0.496094	0.55465	0.701583	0.758513	0.939385	1.05945	1.24023	1.33577	1.58499	1.90878	2.48047	4.10591	38.8769
0	0.211416	0.248047	0.29717	0.407175	0.496094	0.55465	0.701583	0.759255	0.939415	1.06008	1.24023	1.33577	1.58827	1.9349	2.48047	4.12832	39.1419
0	0.211546	0.248047	0.297576	0.407294	0.496094	0.55465	0.701583	0.759978	0.939815	1.06146	1.24023	1.33577	1.58827	1.93731	2.48047	4.15802	39.2902
0	0.211572	0.248047	0.297954	0.408794	0.496094	0.55465	0.701583	0.761356	0.940081	1.06455	1.24023	1.33577	1.58827	1.93731	2.48047	4.2168	39.4956
0	0.211586	0.248047	0.298081	0.409799	0.496094	0.55465	0.701583	0.763152	0.94066	1.06534	1.24023	1.33577	1.58827	1.93731	2.48047	4.2168	39.6573
0	0.211637	0.248047	0.298524	0.410793	0.496094	0.55465	0.701583	0.76403	0.943462	1.06663	1.24023	1.33577	1.58827	1.93731	2.48047	4.2168	39.6642
0	0.21169	0.248047	0.298781	0.411891	0.496094	0.55465	0.701583	0.765514	0.943789	1.06778	1.24023	1.33577	1.58827	1.93731	2.48047	4.23863	39.7154
0	0.21178	0.248047	0.29891	0.412272	0.496094	0.55465	0.701583	0.767535	0.943978	1.06783	1.24023	1.33577	1.58827	1.93731	2.48047	4.23863	39.7255
0	0.211836	0.248047	0.299168	0.412376	0.496094	0.55465	0.701583	0.768746	0.944188	1.07095	1.24023	1.33577	1.58827	1.93731	2.48047	4.26756	39.7781
0	0.211932	0.248047	0.299906	0.412827	0.496094	0.55465	0.701583	0.770165	0.944471	1.07208	1.24023	1.33577	1.58827	1.93731	2.48047	4.26756	39.9964
0	0.212599	0.248047	0.300274	0.412926	0.496094	0.55465	0.701583	0.770218	0.945061	1.07312	1.24023	1.33577	1.58827	1.93731	2.48047	4.26756	40.0187
0	0.212727	0.248047	0.300325	0.413049	0.496094	0.55465	0.701583	0.770547	0.945107	1.07501	1.24023	1.33577	1.58827	1.93731	2.48047	4.33195	40.0463
0	0.212828	0.248047	0.301005	0.413331	0.496094	0.55465	0.701583	0.773019	0.946702	1.07765	1.24023	1.33577	1.58827	1.93731	2.48047	4.33195	40.0555
0	0.213977	0.248047	0.301225	0.414687	0.496094	0.55465	0.701583	0.775518	0.947522	1.07817	1.24023	1.33577	1.58827	1.93731	2.48047	4.33905	40.0732
0	0.214913	0.248047	0.302082	0.414828	0.496094	0.55465	0.701583	0.775609	0.947682	1.07883	1.24023	1.33577	1.58827	1.93731	2.48047	4.33905	40.2211
0	0.215159	0.248047	0.302118	0.41575	0.496094	0.55465	0.701583	0.775719	0.948165	1.07886	1.24023	1.33577	1.58827	1.93731	2.48047	4.47173	40.4288
0	0.215458	0.248047	0.302189	0.416016	0.496094	0.55465	0.701583	0.778437	0.948864	1.08557	1.24023	1.33577	1.58827	1.93731	2.48047	4.47173	40.5843
0	0.21547	0.248047	0.302664	0.416094	0.496094	0.55465	0.701583	0.779284	0.950788	1.08615	1.24023	1.33577	1.58827	1.93731	2.48047	4.47173	40.5866
0	0.215634	0.248047	0.302703	0.416303	0.496094	0.55465	0.701583	0.779551	0.952231	1.08664	1.24023	1.33577	1.58827	1.93731	2.48047	4.47173	40.626
0	0.215868	0.248047	0.302773	0.417263	0.496094	0.55465	0.701583	0.781484	0.952944	1.08738	1.24023	1.33577	1.58827	1.93731	2.4901	4.49232	40.6441
0	0.215909	0.248047	0.302823	0.417396	0.496094	0.55465	0.701583	0.782566	0.954022	1.08827	1.24023	1.33577	1.58827	1.93731	2.49284	4.56029	40.6751
0	0.216083	0.248047	0.303012	0.417801	0.496094	0.55465	0.701583	0.783709	0.957974	1.0894	1.24023	1.33577	1.58827	1.93731	2.49284	4.56029	40.6868
0	0.216105	0.248047	0.303467	0.417956	0.496094	0.55465	0.701583	0.784393	0.960265	1.09012	1.24023	1.33577	1.58827	1.93731	2.49284	4.57376	40.75
0	0.216388	0.248047	0.303533	0.418268	0.496094	0.55465	0.701583	0.784393	0.960376	1.0903	1.24023	1.33577	1.58827	1.93731	2.49284	4.61394	40.9645
0	0.216932	0.248047	0.304712	0.419064	0.496094	0.55465	0.701583	0.784393	0.963114	1.09064	1.24023	1.33577	1.58827	1.93731	2.49284	4.6339	41.0171
0	0.216987	0.248047	0.304888	0.419127	0.496094	0.55465	0.701583	0.784393	0.963601	1.09443	1.24023	1.33577	1.58827	1.93731	2.49284	4.66038	41.0591
0	0.216993	0.248047	0.305313	0.419479	0.496094	0.55465	0.702835	0.784393	0.965629	1.09506	1.24023	1.33577	1.58827	1.93731	2.49284	4.66038	41.4891
0	0.217124	0.248047	0.305883	0.420917	0.496094	0.55465	0.704146	0.784393	0.96651	1.0977	1.24023	1.33577	1.58827	1.93731	2.49284	4.66038	41.5017
0	0.217152	0.248047	0.306241	0.421725	0.496094	0.55465	0.704738	0.784393	0.966903	1.09826	1.24023	1.33577	1.58827	1.93731	2.49284	4.76482	41.5158
0	0.218061	0.248047	0.306244	0.421946	0.496094	0.55465	0.705363	0.784393	0.967109	1.09891	1.24023	1.33577	1.58827	1.93731	2.50521	4.76482	41.5306
0	0.218092	0.248047	0.306282	0.422919	0.496094	0.55465	0.706372	0.784393	0.967598	1.09965	1.24023	1.33577	1.58827	1.93731	2.52483	4.76482	41.6135
0	0.218132	0.248047	0.306453	0.423078	0.496094	0.55465	0.706674	0.784393	0.968371	1.10036	1.24023	1.33577	1.58827	1.93731	2.52959	4.76482	41.7146
0	0.218419	0.248047	0.307028	0.423105	0.496094	0.55465	0.706706	0.784393	0.971609	1.10224	1.24023	1.33577	1.58827	1.93731	2.52959	4.76482	41.9962
0	0.218472	0.248047	0.307081	0.423406	0.496094	0.55465	0.706942	0.784393	0.974543	1.10244	1.24023	1.33577	1.58827	1.93731	2.52959	4.76482	42.0438
0	0.218491	0.248047	0.307148	0.424346	0.496094	0.55465	0.708142	0.784393	0.978926	1.10259	1.24023	1.33577	1.58827	1.93731	2.52959	4.79058	42.2248
0	0.218746	0.248047	0.308125	0.426857	0.496094	0.55465	0.709269	0.784393	0.97908	1.10295	1.24023	1.33577	1.58827	1.93731	2.52959	4.8162	42.2714
0	0.219147	0.248047	0.30827	0.42761	0.496094	0.55465	0.709639	0.784393	0.980295	1.10318	1.24023	1.33577	1.58827	1.93731	2.52959	4.8162	42.358
0	0.219259	0.248047	0.309516	0.427828	0.496094	0.55465	0.709688	0.784393	0.980637	1.10334	1.24023	1.33577	1.58827	1.93731	2.52959	4.88596	42.6619
0	0.21926	0.248047	0.309817	0.42854	0.496094	0.55465	0.710725	0.784393	0.981054	1.1042	1.24023	1.33577	1.58827	1.93731	2.52959	4.94989	42.7174
0	0.219357	0.248047	0.31118	0.428699	0.496094	0.55465	0.710832	0.784393	0.981075	1.10609	1.24023	1.33577	1.58827	1.93731	2.52959	4.98568	42.915
0	0.219607	0.248047	0.31127	0.428743	0.496094	0.55465	0.710833	0.784393	0.992188	1.10735	1.24023	1.33577	1.58827	1.94229	2.52959	5.02257	43.0524
0	0.220385	0.248047	0.312563	0.428862	0.496094	0.55465	0.710877	0.784393	0.992188	1.10758	1.24023	1.33577	1.58827	1.9542	2.52959	5.05918	43.2235
0	0.220479	0.248047	0.31292	0.429053	0.496094	0.55465	0.711268	0.784393	0.992188	1.10767	1.24023	1.33577	1.58827	1.95544	2.52959	5.11362	43.6675
0	0.220593	0.248047	0.313059	0.429098	0.496094	0.55465	0.713175	0.784393	0.992188	1.10788	1.24023	1.33577	1.58827	1.95607	2.53176	5.11362	43.6933
0	0.22073	0.248047	0.31331	0.429279	0.496094	0.55465	0.714101	0.784393	0.992188	1.10822	1.24023	1.33577	1.58827	1.95668	2.5538	5.21489	43.8594
0	0.220903	0.248047	0.313383	0.42984	0.496094	0.55465	0.716968	0.784393	0.992188	1.10866	1.24023	1.33577	1.58827	1.96176	2.5538	5.26187	43.8826
0	0.221347	0.248047	0.314056	0.429876	0.496094	0.55465	0.717903	0.784393	0.992188	1.1088	1.24023	1.33577	1.58827	1.98059	2.5538	5.27355	43.8931
0	0.221505	0.248047	0.31418	0.43024	0.496094	0.55465	0.718007	0.784393	0.992188	1.1093	1.24023	1.33577	1.58827	1.98438	2.5538	5.27355	44.1614
0	0.221721	0.248047	0.314426	0.431163	0.496094	0.554715	0.718547	0.784393	0.992188	1.1093	1.24023	1.33577	1.58827	1.98438	2.5538	5.44009	44.2345
0	0.222416	0.248047	0.315861	0.433431	0.496094	0.55531	0.71895	0.784393	0.992188	1.1093	1.24023	1.33577	1.58827	1.98438	2.5538	5.44574	44.729
0	0.222721	0.248047	0.316017	0.433694	0.496094	0.557434	0.720677	0.784393	0.992188	1.1093	1.24023	1.33577	1.58827	1.98438	2.5538	5.49075	44.7489
0	0.222783	0.248047	0.317271	0.433998	0.496094	0.557537	0.721703	0.784393	0.992188	1.1093	1.24023	1.33577	1.58827	1.98438	2.5538	5.49075	44.8499
0	0.222797	0.248047	0.317419	0.434311	0.496094	0.557811	0.722731	0.784393	0.992188	1.1093	1.24023	1.33577	1.58827	1.98438	2.5538	5.62361	44.9027
0	0.222871	0.248047	0.317634	0.434398	0.496094	0.557932	0.722988	0.784393	0.992188	1.1093	1.24023	1.33665	1.58827	1.98438	2.5538	5.71047	44.9068
0	0.222878	0.248047	0.3194	0.434673	0.496094	0.558207	0.723536	0.784393	0.992188	1.1093	1.24023	1.33669	1.58827	1.98438	2.5538	5.72661	44.9306
0	0.223577	0.248047	0.321237	0.43476	0.496094	0.558282	0.724081	0.784393	0.992188	1.1093	1.24023	1.33752	1.58827	1.98438	2.5538	5.85412	44.9684
0	0.223747	0.248047	0.321239	0.4351	0.496094	0.558688	0.724626	0.784393	0.992188	1.1093	1.24023	1.33859	1.58827	1.98438	2.5538	5.95829	45.2507
0	0.223759	0.248047	0.321984	0.435698	0.496094	0.559025	0.725012	0.784393	0.992188	1.1093	1.24023	1.34395	1.58827	1.98438	2.5538	6.10115	45.2861
0	0.224265	0.248047	0.322312	0.436379	0.496094	0.559245	0.725129	0.784393	0.992188	1.1093	1.24023	1.34448	1.58827	1.98438	2.5538	6.12631	45.4461
0	0.224302	0.248047	0.322614	0.43669	0.496094	0.559532	0.725895	0.784393	0.992188	1.1093	1.24023	1.34491	1.58827	1.98438	2.5538	6.15206	45.4813
0	0.226173	0.248047	0.322614	0.437313	0.496094	0.560099	0.726388	0.784393	0.992188	1.1093	1.24023	1.34749	1.58827	1.98438	2.5538	6.1805	45.6116
0	0.226597	0.248047	0.322678	0.437503	0.496094	0.561278	0.728456	0.784393	0.992188	1.1093	1.24023	1.34857	1.58827	1.98438	2.5538	6.20117	45.8612
0	0.227744	0.248047	0.323306	0.439254	0.496094	0.56144	0.729105	0.784393	0.992188	1.1093	1.24023	1.34898	1.58827	1.99179	2.5538	6.20613	45.8833
0	0.228107	0.248047	0.323462	0.439261	0.496094	0.561472	0.730083	0.784393	0.992188	1.1093	1.24023	1.34994	1.58827	1.99747	2.5538	6.22098	46.0707
0	0.228169	0.248047	0.323604	0.43941	0.496094	0.56156	0.731128	0.784393	0.992188	1.1093	1.24023	1.35038	1.58827	1.99924	2.55434	6.31424	46.1508
0	0.228458	0.248047	0.324113	0.440259	0.496094	0.561645	0.733653	0.784393	0.992188	1.1093	1.24369	1.35159	1.58827	1.99982	2.57033	6.32398	46.222
0	0.2287	0.248047	0.325067	0.440792	0.496094	0.562615	0.733936	0.784393	0.992188	1.1093	1.24416	1.35469	1.58827	1.99982	2.57336	6.44922	46.4027
0	0.228764	0.248047	0.325926	0.441119	0.496094	0.562922	0.734491	0.784393	0.992188	1.1093	1.24474	1.3632	1.58827	1.99982	2.58969	6.46827	46.6434
0	0.228867	0.248047	0.326209	0.441816	0.496094	0.563845	0.735976	0.784393	0.992188	1.1093	1.24675	1.36445	1.58827	1.99982	2.58969	6.49201	46.8182
0	0.229213	0.248047	0.327175	0.442468	0.496094	0.564194	0.737413	0.784393	0.992188	1.1093	1.24907	1.36447	1.58827	1.99982	2.58969	6.49201	46.9274
0	0.229414	0.248047	0.327423	0.44256	0.496094	0.564195	0.738458	0.784393	0.992188	1.1093	1.25181	1.3673	1.58827	1.99982	2.58969	6.51094	46.9916
0	0.229656	0.248047	0.327471	0.443286	0.496094	0.564296	0.740448	0.784393	0.992188	1.1093	1.25211	1.371	1.58827	1.99982	2.58969	6.66503	47.0767
0	0.22975	0.248047	0.327562	0.443318	0.496094	0.564996	0.740758	0.784393	0.992188	1.1093	1.25375	1.37622	1.58827	1.99982	2.58969	6.67887	47.1583
0	0.229828	0.248047	0.327765	0.443631	0.496094	0.565824	0.743311	0.784393	0.992188	1.1093	1.25942	1.37745	1.58827	1.99982	2.58969	6.77036	47.7031
0	0.22983	0.248047	0.328046	0.44483	0.496094	0.56675	0.744141	0.784393	0.992188	1.1093	1.25966	1.37924	1.58827	1.99982	2.58969	6.84268	47.7701
0	0.230137	0.248047	0.328596	0.444896	0.496094	0.568427	0.744141	0.784393	0.992188	1.1093	1.2646	1.38005	1.58827	1.99982	2.58969	6.84268	48.1288
0	0.230198	0.248047	0.328979	0.445826	0.496094	0.568471	0.744141	0.784393	0.992188	1.1093	1.2648	1.38474	1.58827	1.99982	2.58969	6.86064	48.2577
0	0.230226	0.248047	0.329449	0.44692	0.496094	0.569316	0.744141	0.784393	0.992188	1.1093	1.2648	1.38508	1.58827	1.99982	2.59747	6.89642	48.4022
0	0.230277	0.248047	0.32956	0.447302	0.496094	0.569476	0.744141	0.784393	0.992188	1.1093	1.2648	1.38673	1.58827	1.99982	2.60161	6.90979	48.4549
0	0.230309	0.248047	0.331354	0.447904	0.496094	0.569497	0.744141	0.784393	0.992188	1.1093	1.2648	1.38815	1.58827	1.99982	2.63677	6.94974	48.8123
0	0.230597	0.248047	0.332041	0.448458	0.496094	0.569902	0.744141	0.784393	0.992188	1.1093	1.2648	1.38946	1.58827	1.99982	2.63677	7.01583	48.9332
0	0.231368	0.248047	0.332699	0.448874	0.496094	0.570489	0.744141	0.784393	0.992188	1.1093	1.2648	1.39049	1.58827	1.99982	2.63677	7.02021	49.1233
0	0.231453	0.248047	0.332706	0.449146	0.496094	0.570904	0.744141	0.784393	0.992188	1.1093	1.2648	1.3925	1.58827	1.99982	2.63677	7.10298	49.3314
0	0.231579	0.248047	0.333655	0.449253	0.496094	0.572412	0.744141	0.784393	0.992188	1.1093	1.2648	1.39889	1.58827	1.99982	2.63677	7.15477	49.5628
0	0.231706	0.248047	0.333721	0.449397	0.496094	0.572854	0.744141	0.784393	0.992188	1.1093	1.2648	1.40157	1.58827	1.99982	2.63677	7.19336	49.9419
0	0.23179	0.248047	0.334017	0.451263	0.496094	0.572864	0.744141	0.784393	0.992188	1.1093	1.2648	1.40183	1.58827	1.99982	2.63677	7.19336	50.2728
0	0.231987	0.248047	0.334355	0.452304	0.496094	0.57331	0.744141	0.784393	0.992188	1.1093	1.2648	1.40317	1.58827	1.99982	2.63677	7.21045	50.3657
0	0.232422	0.248047	0.334623	0.45233	0.496094	0.575609	0.744141	0.784393	0.992188	1.1093	1.2648	1.40317	1.58827	1.99982	2.63677	7.23175	50.4579
0	0.232987	0.248047	0.334838	0.452483	0.496094	0.577599	0.744141	0.784393	0.992188	1.1093	1.2648	1.40317	1.58827	1.99982	2.63677	7.26146	50.956
0	0.233109	0.248047	0.335245	0.453032	0.496094	0.578854	0.744141	0.784856	0.992188	1.1093	1.2648	1.40317	1.58827	1.99982	2.63677	7.34782	50.9807
0	0.233193	0.248047	0.335916	0.454325	0.496094	0.578891	0.744141	0.785283	0.992188	1.1093	1.2648	1.40317	1.59092	2.00076	2.63677	7.37496	51.1464
0	0.233439	0.248047	0.335985	0.454486	0.496094	0.579072	0.744141	0.786561	0.992188	1.1093	1.2648	1.40317	1.59538	2.0031	2.64945	7.37496	52.239
0	0.233749	0.248047	0.337524	0.455442	0.496094	0.579574	0.744141	0.786934	0.992188	1.1093	1.2648	1.40317	1.59927	2.00321	2.65688	7.53181	52.5215
0	0.233936	0.248047	0.337539	0.455633	0.496094	0.579769	0.744141	0.788052	0.992188	1.1093	1.2648	1.40317	1.60435	2.0075	2.67155	7.69345	53.7575
0	0.234132	0.248047	0.337742	0.456007	0.496094	0.579895	0.744141	0.788107	0.992188	1.1093	1.2648	1.40317	1.6126	2.0119	2.67155	7.70145	54.1743
0	0.234367	0.248047	0.338679	0.456498	0.496094	0.580244	0.744141	0.78881	0.992188	1.1093	1.2648	1.40317	1.62047	2.01343	2.67155	7.70544	56.0964
0	0.234956	0.248047	0.33915	0.456542	0.496094	0.580996	0.744141	0.790117	0.992188	1.1093	1.2648	1.40317	1.62139	2.01523	2.67155	7.87915	57.5779
0	0.235049	0.248047	0.339302	0.456896	0.496094	0.581745	0.744141	0.791256	0.992188	1.1093	1.2648	1.40317	1.6309	2.01606	2.67155	7.88305	58.6745
0	0.23525	0.248047	0.3395	0.457259	0.496094	0.582849	0.744141	0.792547	0.992188	1.1093	1.2648	1.4054	1.6323	2.01864	2.67155	7.89475	59.0649
0	0.237182	0.248047	0.339579	0.457876	0.496094	0.582867	0.744141	0.794485	0.992188	1.1093	1.2648	1.40704	1.63296	2.02275	2.67155	8.03381	59.538
0	0.23786	0.248047	0.339832	0.458774	0.496094	0.58323	0.744141	0.796154	0.992188	1.1093	1.2648	1.40971	1.63553	2.02424	2.67155	8.21332
0	0.23847	0.248047	0.340258	0.458863	0.496094	0.583396	0.744141	0.796894	0.992188	1.11207	1.2648	1.41265	1.63712	2.02577	2.67155	8.33452
0	0.238635	0.248047	0.340476	0.459348	0.496094	0.584069	0.744141	0.797036	0.992188	1.11419	1.2648	1.41736	1.64154	2.02834	2.67155	8.46636
0	0.238758	0.248047	0.340721	0.460438	0.496094	0.58517	0.744141	0.797425	0.992188	1.11624	1.2648	1.42209	1.64382	2.03284	2.67155	8.49176
0	0.238802	0.248047	0.340975	0.461164	0.496094	0.586955	0.744141	0.79753	0.992188	1.11685	1.2648	1.42262	1.64744	2.03395	2.67155	8.61048
0	0.239112	0.248047	0.341083	0.462129	0.496094	0.587836	0.744141	0.798268	0.992188	1.1184	1.2648	1.4244	1.64888	2.03805	2.6815	8.6781
0	0.239175	0.248047	0.341329	0.464094	0.496094	0.588213	0.744141	0.799442	0.992188	1.12222	1.2648	1.42492	1.65653	2.03938	2.68304	8.6937
0	0.239264	0.248047	0.342138	0.464678	0.496094	0.589009	0.744141	0.799987	0.992188	1.1239	1.2648	1.42603	1.66395	2.04545	2.68304	8.70994
0	0.239298	0.248047	0.342288	0.464947	0.496094	0.589157	0.744141	0.802903	0.992188	1.12729	1.2648	1.43774	1.66395	2.04545	2.68304	8.7978
0.00112308	0.239539	0.248047	0.34329	0.46508	0.496094	0.589829	0.744141	0.803449	0.992188	1.12924	1.2648	1.43943	1.66395	2.04545	2.68304	8.8327
0.00227677	0.239811	0.248047	0.343497	0.466962	0.496094	0.591519	0.744141	0.803689	0.992188	1.13015	1.2648	1.44022	1.66395	2.04545	2.68304	8.94346
0.00416911	0.239824	0.248047	0.344292	0.467433	0.496094	0.593037	0.744141	0.806309	0.992188	1.13379	1.2648	1.44635	1.66395	2.04545	2.68304	9.09693
0.00786449	0.240317	0.248047	0.34453	0.468801	0.496094	0.593523	0.744141	0.808749	0.992188	1.13778	1.2648	1.44635	1.66395	2.04545	2.68304	9.10707
0.00967701	0.240776	0.248047	0.344548	0.468898	0.496094	0.594779	0.744141	0.808799	0.992188	1.13832	1.2648	1.44635	1.66395	2.04545	2.68304	9.12057
0.010049	0.240842	0.248047	0.344836	0.469085	0.496094	0.595133	0.744141	0.810062	0.992188	1.14535	1.2648	1.44635	1.66395	2.04545	2.68304	9.12458
0.0105682	0.240888	0.248047	0.345708	0.469641	0.496094	0.59568	0.744141	0.811637	0.992188	1.14554	1.2648	1.44635	1.66395	2.04545	2.68304	9.12732
0.0110555	0.240981	0.248047	0.345959	0.469762	0.496094	0.596027	0.744141	0.812428	0.992188	1.14583	1.2648	1.44635	1.66395	2.05167	2.68304	9.15088
0.0110999	0.241171	0.248047	0.345996	0.470226	0.496094	0.59627	0.744141	0.81308	0.992188	1.14596	1.2648	1.44635	1.66395	2.05349	2.70104	9.34054
0.013013	0.241627	0.248047	0.346154	0.470294	0.496094	0.596729	0.744141	0.81329	0.992188	1.14854	1.2648	1.44635	1.66395	2.05406	2.72852	9.49731
0.0130484	0.241909	0.248047	0.346252	0.470413	0.496094	0.597283	0.744141	0.814025	0.992188	1.15219	1.2648	1.44635	1.66395	2.05735	2.72852	9.57474
0.0132914	0.241994	0.248047	0.347169	0.470573	0.496094	0.598331	0.744141	0.814792	0.992188	1.15338	1.2648	1.44635	1.66395	2.05915	2.72852	9.58283
0.0140344	0.242285	0.248047	0.347779	0.470633	0.496094	0.599399	0.744141	0.815122	0.992188	1.15352	1.2648	1.44635	1.66395	2.06378	2.72852	9.67383
0.0142562	0.242516	0.248047	0.348184	0.470694	0.496094	0.600681	0.744141	0.815397	0.992188	1.1554	1.2648	1.44635	1.66395	2.06395	2.72852	9.78764
0.0146982	0.242563	0.248047	0.348263	0.472161	0.496094	0.6012	0.744141	0.819534	0.992188	1.15565	1.2648	1.44635	1.66395	2.06409	2.72982	9.82842
0.0147008	0.242574	0.248047	0.348487	0.472685	0.496094	0.601716	0.744141	0.819787	0.992188	1.1602	1.2648	1.44635	1.66395	2.06539	2.73094	9.87526
0.0151339	0.242725	0.248047	0.348592	0.472807	0.496094	0.601778	0.744141	0.819992	0.992188	1.16038	1.2648	1.44635	1.66395	2.06595	2.73977	9.87837
0.0151857	0.242807	0.248047	0.348899	0.476404	0.496094	0.602456	0.744141	0.820009	0.992188	1.16087	1.2648	1.44635	1.66395	2.0669	2.73977	9.90325
0.0153774	0.242886	0.248047	0.348999	0.476638	0.496094	0.602598	0.744141	0.820671	0.992188	1.16106	1.2648	1.44635	1.66395	2.07239	2.73977	9.90325
0.0156967	0.243072	0.248047	0.34928	0.476986	0.496094	0.60511	0.744141	0.820786	0.992188	1.1655	1.2648	1.44635	1.66395	2.07373	2.73977	9.91257
0.0161535	0.243092	0.248047	0.349519	0.478436	0.496094	0.606387	0.744141	0.821469	0.992188	1.16927	1.2648	1.44635	1.66395	2.0764	2.73977	9.92498
0.016633	0.24342	0.248047	0.349572	0.479078	0.496094	0.606473	0.744141	0.822613	0.992188	1.17047	1.2648	1.44635	1.66677	2.07679	2.73977	10.182
0.016964	0.24353	0.248047	0.349874	0.479189	0.496094	0.60668	0.744141	0.822668	0.992188	1.17084	1.2648	1.44635	1.66837	2.08404	2.73977	10.468
0.016969	0.244122	0.248047	0.350024	0.479629	0.496094	0.608746	0.744141	0.822919	0.992188	1.17091	1.2648	1.44635	1.67261	2.08583	2.73977	10.468
0.0182824	0.244192	0.248047	0.350238	0.480229	0.496094	0.610186	0.744141	0.825656	0.992188	1.17114	1.2648	1.44635	1.67346	2.08746	2.74236	10.5237
0.0183731	0.244506	0.248047	0.350349	0.480414	0.496094	0.610416	0.744141	0.826168	0.992188	1.17156	1.2648	1.44635	1.68044	2.08955	2.75421	10.5296
0.018386	0.244728	0.248047	0.350381	0.480658	0.496094	0.610605	0.744141	0.828535	0.992188	1.17435	1.2648	1.44635	1.68102	2.09061	2.77325	10.5529
0.0187292	0.244875	0.248047	0.350735	0.480782	0.496094	0.610789	0.744141	0.830577	0.992188	1.18185	1.2648	1.44635	1.68939	2.09276	2.77325	10.5617
0.0196557	0.244932	0.248047	0.350791	0.48169	0.496094	0.611284	0.744141	0.830645	0.992188	1.18515	1.2648	1.44635	1.69959	2.09413	2.77325	10.5966
0.021327	0.244989	0.248047	0.350791	0.481732	0.496094	0.612061	0.744141	0.830782	0.992188	1.18667	1.2648	1.44635	1.70766	2.09428	2.77325	10.666
0.022478	0.245036	0.248047	0.350791	0.482124	0.496094	0.612205	0.744141	0.830898	0.992188	1.18912	1.2648	1.44635	1.71103	2.09562	2.77325	10.6919
0.0226597	0.245249	0.248047	0.350791	0.482775	0.496094	0.612215	0.744141	0.832247	0.992188	1.194	1.2648	1.44635	1.7146	2.09899	2.77325	10.7092
0.0228203	0.245321	0.248047	0.350791	0.482989	0.496806	0.61284	0.744141	0.837618	0.992188	1.19481	1.2648	1.44635	1.71481	2.09984	2.77325	10.7121
0.023022	0.245515	0.248047	0.350791	0.483526	0.497668	0.612887	0.744141	0.838617	0.992188	1.19565	1.2648	1.44635	1.71718	2.09993	2.77325	10.7321
0.0234286	0.245587	0.248047	0.350791	0.483828	0.499033	0.613101	0.744141	0.839496	0.992188	1.1958	1.2648	1.44635	1.71823	2.10475	2.77325	10.7379
0.0242164	0.245633	0.248047	0.350791	0.483834	0.499269	0.613255	0.744141	0.839687	0.992188	1.196	1.2648	1.44635	1.72403	2.10475	2.77325	10.8349
0.0247811	0.245724	0.248047	0.350791	0.484394	0.499348	0.613554	0.744141	0.840333	0.992188	1.19671	1.2648	1.44635	1.72499	2.10676	2.77325	10.849
0.0247861	0.246139	0.248047	0.350791	0.485179	0.499448	0.613689	0.744141	0.841047	0.992188	1.20149	1.2648	1.44635	1.72537	2.10706	2.77325	10.8802
0.0249669	0.246188	0.248047	0.350791	0.485873	0.500511	0.615714	0.744141	0.842169	0.992188	1.20301	1.2648	1.44635	1.73163	2.11039	2.77325	10.8915
0.0270462	0.246202	0.248047	0.350791	0.486531	0.500992	0.616506	0.744141	0.842512	0.992188	1.20531	1.2648	1.44635	1.73633	2.1109	2.77325	10.9169
0.0270871	0.24654	0.248047	0.350791	0.486762	0.501156	0.618036	0.744141	0.843756	0.992188	1.2068	1.2648	1.44635	1.73633	2.11164	2.77325	10.9169
0.0272177	0.24655	0.248047	0.350791	0.487169	0.50128	0.619398	0.744141	0.844991	0.992188	1.21075	1.2648	1.44635	1.73633	2.1158	2.77325	10.9394
0.0272584	0.2471	0.248047	0.350791	0.487933	0.501286	0.620282	0.744141	0.845226	0.992188	1.21158	1.2648	1.44635	1.73633	2.1167	2.77325	10.9506
0.0273328	0.247106	0.248047	0.350791	0.488465	0.501553	0.622443	0.744141	0.848269	0.992188	1.21197	1.2648	1.44635	1.73633	2.11931	2.77325	10.9506
0.0274876	0.247107	0.248047	0.350791	0.489679	0.501947	0.622797	0.744141	0.848555	0.992188	1.21297	1.2648	1.44635	1.73633	2.11931	2.77325	11.0095
0.0276325	0.247624	0.248047	0.350791	0.490066	0.502203	0.622913	0.744141	0.849951	0.992188	1.2138	1.2648	1.44635	1.73633	2.11931	2.77325	11.0513
0.0277948	0.247733	0.248047	0.350791	0.490496	0.502343	0.623324	0.744141	0.851082	0.992188	1.21598	1.2648	1.44635	1.73633	2.11931	2.77325	11.0624
0.0279078	0.247852	0.248047	0.350791	0.490797	0.502597	0.623659	0.744141	0.852092	0.992188	1.21871	1.2648	1.44635	1.73633	2.11931	2.77325	11.0763
0.0281208	0.247918	0.248047	0.350791	0.491011	0.503925	0.623942	0.744141	0.853308	0.992188	1.22398	1.2648	1.44635	1.73633	2.11931	2.77325	11.093
0.0282714	0.248047	0.248047	0.350791	0.491529	0.504983	0.623962	0.744141	0.853426	0.992188	1.22476	1.2648	1.44635	1.73633	2.11931	2.77325	11.093
0.0285254	0.248047	0.248047	0.350791	0.491583	0.505355	0.623999	0.744141	0.853712	0.992188	1.23206	1.2648	1.44635	1.73633	2.11931	2.77325	11.1924
0.0285537	0.248047	0.248047	0.350791	0.491674	0.505603	0.624927	0.744141	0.855444	0.992188	1.23362	1.2648	1.44635	1.73633	2.11931	2.77325	11.2171
0.0288039	0.248047	0.248047	0.350791	0.493037	0.506813	0.625661	0.744141	0.855526	0.992188	1.2343	1.2648	1.44635	1.73633	2.11931	2.77325	11.25
0.0295356	0.248047	0.248047	0.350791	0.494085	0.507126	0.628551	0.744141	0.856937	0.992188	1.23526	1.2648	1.44635	1.74213	2.11931	2.77325	11.3154
0.029892	0.248047	0.248047	0.350791	0.494561	0.507335	0.629766	0.744141	0.858543	0.992188	1.23558	1.2648	1.44635	1.74739	2.11931	2.77325	11.4344
0.0300147	0.248047	0.248047	0.350791	0.495117	0.507372	0.630507	0.744141	0.858547	0.992188	1.24023	1.2648	1.44635	1.74906	2.11931	2.77325	11.4693
0.0301265	0.248047	0.248047	0.350791	0.49533	0.507818	0.63059	0.744141	0.859315	0.994579	1.24023	1.2648	1.44635	1.75396	2.11931	2.77325	11.4908
0.030219	0.248047	0.248047	0.350791	0.496094	0.507935	0.630896	0.744141	0.862837	0.997024	1.24023	1.2648	1.44635	1.75396	2.11931	2.77325	11.5095
0.0306308	0.248047	0.248047	0.350791	0.496094	0.507972	0.631689	0.744141	0.865875	0.997752	1.24023	1.2648	1.44635	1.75396	2.11931	2.77325	11.6265
0.030634	0.248047	0.248047	0.350791	0.496094	0.508163	0.631987	0.744141	0.866684	0.997884	1.24023	1.2648	1.44635	1.75396	2.11931	2.77325	11.6767
0.0309338	0.248047	0.248047	0.350791	0.496094	0.508782	0.632976	0.744141	0.867466	0.999084	1.24023	1.2648	1.44635	1.75396	2.11959	2.77325	11.7607
0.031323	0.248047	0.248047	0.350791	0.496094	0.509566	0.633789	0.744141	0.868237	0.9999	1.24023	1.2648	1.44635	1.75396	2.13059	2.77325	11.7868
0.0315756	0.248047	0.248047	0.350791	0.496094	0.509651	0.634428	0.744141	0.869271	1.00145	1.24023	1.2648	1.44635	1.75396	2.13095	2.77325	11.87
0.0317175	0.248047	0.248047	0.350791	0.496094	0.510044	0.63443	0.744141	0.870085	1.00647	1.24023	1.2648	1.44635	1.75396	2.13132	2.77325	11.9192
0.0317849	0.248047	0.248047	0.350791	0.496094	0.510606	0.634609	0.744141	0.871702	1.00675	1.24023	1.2648	1.44635	1.75396	2.13193	2.77325	11.9707
0.0320626	0.248047	0.248047	0.350791	0.496094	0.511657	0.63478	0.744141	0.872141	1.00828	1.24023	1.2648	1.44635	1.75396	2.13368	2.77325	11.9732
0.0325282	0.248047	0.248047	0.350791	0.496094	0.5124	0.634915	0.744141	0.874158	1.00915	1.24023	1.2648	1.44635	1.75396	2.13378	2.77484	12.1112
0.0333943	0.248047	0.248047	0.350791	0.496094	0.512936	0.635051	0.744141	0.874245	1.00942	1.24023	1.2648	1.44635	1.75396	2.13378	2.78888	12.1568
0.0334496	0.248047	0.248047	0.350791	0.496094	0.513629	0.636003	0.744141	0.874701	1.00969	1.24023	1.2648	1.44635	1.75396	2.13378	2.7916	12.1619
0.0335707	0.248047	0.248047	0.350791	0.496094	0.513809	0.636233	0.744141	0.874939	1.01086	1.24023	1.2648	1.44635	1.75396	2.13378	2.80633	12.1771
0.0342219	0.248047	0.248047	0.350791	0.496094	0.513945	0.636789	0.744141	0.875766	1.01124	1.24023	1.2648	1.44635	1.75396	2.13378	2.80633	12.3576
0.0344118	0.248047	0.248047	0.350791	0.496094	0.5155	0.636889	0.744141	0.87643	1.01139	1.24023	1.2648	1.44635	1.75396	2.13378	2.82453	12.4543
0.0344841	0.248047	0.248047	0.350791	0.496094	0.515754	0.63724	0.744141	0.876449	1.01145	1.24023	1.2648	1.44635	1.75396	2.13378	2.82467	12.4642
0.0345204	0.248047	0.248047	0.350791	0.496094	0.515779	0.637467	0.744141	0.877537	1.01185	1.24023	1.2648	1.44635	1.75396	2.13378	2.82817	12.4839
0.0351827	0.248047	0.248047	0.350791	0.496094	0.516115	0.638442	0.744141	0.877945	1.01472	1.24023	1.2648	1.44635	1.75396	2.13378	2.82817	12.5429
0.0355828	0.248047	0.248047	0.350791	0.496094	0.516641	0.641612	0.744141	0.878392	1.01539	1.24023	1.2648	1.44635	1.75396	2.13378	2.82817	12.5527
0.0358402	0.248047	0.248047	0.350791	0.496094	0.516883	0.641951	0.744141	0.879705	1.01793	1.24023	1.2648	1.44635	1.75396	2.13378	2.82817	12.8295
0.0359747	0.248047	0.248047	0.350791	0.496094	0.517769	0.643099	0.744141	0.883357	1.01956	1.24023	1.2648	1.46598	1.75396	2.13378	2.82817	12.9413
0.0360789	0.248047	0.248047	0.350791	0.496094	0.517882	0.643493	0.744141	0.885392	1.02032	1.24023	1.2648	1.46692	1.75396	2.13378	2.82817	13.0171
0.0361613	0.248047	0.248047	0.350791	0.496094	0.518766	0.644652	0.744141	0.885847	1.02272	1.24023	1.2648	1.46834	1.75396	2.13378	2.82817	13.0973
0.036232	0.248047	0.248047	0.350791	0.496094	0.520051	0.644665	0.744141	0.888658	1.02272	1.24023	1.2648	1.46892	1.75396	2.13378	2.82817	13.1488
0.0363865	0.248047	0.248047	0.350791	0.496094	0.520374	0.645023	0.744141	0.890468	1.02272	1.24023	1.2648	1.46906	1.75396	2.13378	2.82817	13.3231
0.0365472	0.248047	0.248047	0.350791	0.496094	0.5213	0.645476	0.744141	0.890518	1.02272	1.24023	1.2648	1.47134	1.75396	2.13378	2.86613	13.3485
0.0371203	0.248047	0.248047	0.350791	0.496094	0.523039	0.645629	0.744141	0.890899	1.02272	1.24023	1.2648	1.48023	1.75396	2.13378	2.8927	13.5339
0.0371907	0.248047	0.248047	0.350791	0.496094	0.523261	0.645809	0.744141	0.891888	1.02272	1.24023	1.2648	1.48257	1.75396	2.13378	2.8927	13.5407
0.0373063	0.248047	0.248047	0.350791	0.496094	0.523913	0.647744	0.744141	0.892887	1.02272	1.24023	1.2648	1.48527	1.75396	2.13378	2.8927	13.6448
0.0378905	0.248047	0.248047	0.350791	0.496094	0.524697	0.647755	0.744141	0.894346	1.02272	1.24023	1.2648	1.48592	1.75396	2.13378	2.8927	13.6854
0.0379641	0.248047	0.248047	0.350791	0.496094	0.52556	0.647833	0.744141	0.894346	1.02272	1.24023	1.2648	1.4869	1.75396	2.13378	2.8927	13.7593
0.0380097	0.248047	0.248047	0.350791	0.496094	0.527213	0.648005	0.744141	0.894346	1.02272	1.24023	1.2648	1.48828	1.75396	2.13378	2.8927	13.8662
0.0382065	0.248047	0.248047	0.350791	0.496094	0.52752	0.648859	0.744141	0.894346	1.02272	1.24023	1.2648	1.48828	1.75396	2.13378	2.8927	13.8773
0.0393614	0.248047	0.248047	0.350791	0.496094	0.527761	0.649352	0.744141	0.894346	1.02272	1.24023	1.2648	1.48828	1.75396	2.13378	2.9017	13.884
0.0396481	0.248047	0.248047	0.350791	0.496094	0.527883	0.649801	0.744141	0.894346	1.02272	1.24023	1.2648	1.48828	1.75396	2.13378	2.90331	13.9105
0.0400044	0.248047	0.248047	0.350791	0.496094	0.528464	0.650247	0.744141	0.894346	1.02272	1.24023	1.2648	1.48828	1.75396	2.13378	2.97218	13.9105
0.0400463	0.248047	0.248047	0.350791	0.496094	0.528868	0.650631	0.744141	0.894346	1.02272	1.24023	1.2648	1.48828	1.75396	2.13378	2.97656	14.0404
0.0403038	0.248047	0.248047	0.350791	0.496094	0.528899	0.650825	0.744141	0.894346	1.02272	1.24023	1.2648	1.48828	1.75396	2.13378	2.97656	14.0514
0.0407871	0.248047	0.248047	0.350791	0.496094	0.52929	0.650916	0.744141	0.894346	1.02272	1.24023	1.2648	1.48828	1.75396	2.13378	2.97656	14.1016
0.0408384	0.248047	0.248047	0.350791	0.496094	0.530639	0.652279	0.744141	0.894346	1.02272	1.24023	1.2648	1.48828	1.75396	2.13378	2.97656	14.1038
0.0414329	0.248047	0.248047	0.350791	0.496094	0.530837	0.652732	0.744141	0.894346	1.02272	1.24023	1.2648	1.48828	1.75396	2.13378	2.97656	14.1191
0.0419817	0.248047	0.248047	0.350791	0.496094	0.531655	0.65297	0.744141	0.894346	1.02272	1.24023	1.2648	1.48828	1.75396	2.13378	2.97656	14.1925
0.0420864	0.248047	0.248047	0.350791	0.496094	0.532326	0.653957	0.744141	0.894346	1.02272	1.24023	1.2648	1.48828	1.75396	2.13378	2.97656	14.193
0.0422993	0.248047	0.248047	0.350791	0.496094	0.533294	0.653957	0.744141	0.894346	1.02272	1.24023	1.2648	1.48828	1.75396	2.13378	2.97656	14.2449
0.0424305	0.248047	0.248047	0.350791	0.496094	0.534521	0.654658	0.744141	0.894346	1.02272	1.24023	1.2648	1.48828	1.75396	2.13378	2.98688	14.3824
0.0429121	0.248047	0.248047	0.350791	0.496094	0.534567	0.654874	0.744141	0.894346	1.02272	1.24023	1.2648	1.48828	1.75396	2.13378	2.98688	14.3867
0.0430704	0.248047	0.248047	0.350791	0.496094	0.534656	0.655191	0.744141	0.894346	1.02272	1.24023	1.2648	1.48828	1.75396	2.13378	2.98688	14.5356
0.0430776	0.248047	0.248047	0.350791	0.496094	0.535684	0.655364	0.744141	0.894346	1.02272	1.24023	1.2648	1.48828	1.75396	2.13378	2.98688	14.7999
0.0431646	0.248047	0.248047	0.350791	0.496094	0.536386	0.655401	0.744141	0.894346	1.02272	1.24023	1.2648	1.48828	1.75396	2.13435	2.98688	15.0598
0.0436564	0.248047	0.248047	0.350791	0.496094	0.536753	0.656377	0.744141	0.894346	1.02272	1.24023	1.2648	1.48828	1.75396	2.13642	2.98688	15.1207
0.0455369	0.248047	0.248047	0.350791	0.496094	0.537399	0.656677	0.744141	0.894346	1.02272	1.24023	1.2648	1.48828	1.75396	2.1394	2.98688	15.1491
0.0459183	0.248047	0.248047	0.350791	0.496094	0.53763	0.658327	0.744141	0.894346	1.02272	1.24023	1.2648	1.48828	1.75396	2.13944	2.99716	15.3007
0.0460067	0.248047	0.248047	0.350791	0.496094	0.538464	0.660621	0.744141	0.894346	1.02272	1.24023	1.2648	1.48828	1.75396	2.14003	2.99716	15.3409
0.0460107	0.248047	0.248047	0.350791	0.496094	0.538529	0.661144	0.744141	0.894346	1.02272	1.24023	1.26802	1.48828	1.75396	2.14128	2.99716	15.3409
0.0462268	0.248047	0.248047	0.350791	0.496094	0.53919	0.661561	0.744141	0.894346	1.02272	1.24023	1.26878	1.48828	1.75396	2.14264	2.99716	15.3409
0.0463265	0.248047	0.248047	0.350791	0.496094	0.539908	0.661678	0.744141	0.894346	1.02272	1.24023	1.2689	1.48828	1.75396	2.15291	3.01434	15.4766
0.0466072	0.248047	0.248047	0.350791	0.496094	0.540342	0.662807	0.744141	0.894346	1.02272	1.24023	1.27193	1.48828	1.75396	2.155	3.0278	15.548
0.0469491	0.248047	0.248047	0.350791	0.496094	0.540499	0.663081	0.744141	0.894346	1.02272	1.24023	1.27558	1.48828	1.75396	2.16138	3.0278	15.6191
0.0472699	0.248047	0.248047	0.350791	0.496094	0.540543	0.664597	0.744141	0.894346	1.02272	1.24023	1.27579	1.48828	1.75396	2.17363	3.0278	15.6348
0.0476069	0.248047	0.248047	0.350791	0.496094	0.541554	0.666882	0.744141	0.894346	1.02272	1.24023	1.27633	1.48828	1.75396	2.17501	3.0278	15.6584
0.0480419	0.248047	0.248047	0.350791	0.496094	0.542264	0.667977	0.744141	0.894346	1.02272	1.24023	1.27911	1.49199	1.75396	2.17514	3.0278	15.6584
0.0483833	0.248047	0.248047	0.350791	0.496094	0.54336	0.668515	0.744141	0.894346	1.02272	1.24023	1.2877	1.49404	1.75396	2.17654	3.06817	15.8012
0.0489541	0.248047	0.248047	0.350791	0.496094	0.543518	0.668618	0.744141	0.894346	1.02272	1.24023	1.2893	1.49718	1.75396	2.17654	3.06817	15.8304
0.0490796	0.248047	0.248047	0.350791	0.496094	0.545054	0.668775	0.744141	0.894346	1.02272	1.24023	1.29005	1.49838	1.75396	2.18161	3.08551	15.8478
0.0492417	0.248047	0.248047	0.350791	0.496094	0.545502	0.669168	0.744141	0.894346	1.02272	1.24023	1.29367	1.50268	1.75396	2.18567	3.10432	16.0389
0.0496573	0.248047	0.248047	0.350791	0.496094	0.545557	0.670394	0.744141	0.894346	1.02272	1.24023	1.29533	1.5066	1.75396	2.19248	3.10802	16.1078
0.0503202	0.248047	0.248047	0.350791	0.496094	0.547419	0.671745	0.744141	0.894346	1.02272	1.24023	1.29641	1.50763	1.75396	2.199	3.13757	16.2731
0.0509368	0.248047	0.248047	0.350791	0.496094	0.54745	0.672747	0.744141	0.894346	1.02272	1.24023	1.29684	1.50881	1.75396	2.19925	3.14307	16.3805
0.0514675	0.248047	0.248047	0.350791	0.496094	0.547566	0.67364	0.744141	0.894346	1.02272	1.24023	1.29924	1.50881	1.75396	2.20791	3.17655	16.4704
0.051685	0.248047	0.248047	0.350791	0.496094	0.548168	0.674943	0.744141	0.894346	1.02272	1.24023	1.30007	1.50881	1.75396	2.20811	3.17655	16.4909
0.0517065	0.248047	0.248047	0.350791	0.496094	0.548359	0.675397	0.744141	0.894346	1.02272	1.24023	1.30033	1.50881	1.75396	2.20946	3.17655	16.5226
0.052122	0.248047	0.248047	0.350791	0.496094	0.548648	0.676367	0.744141	0.894346	1.02272	1.24023	1.30066	1.50881	1.75396	2.21088	3.17655	16.5821
0.052367	0.248047	0.248047	0.350791	0.496094	0.549019	0.676742	0.744141	0.894346	1.02272	1.24023	1.30251	1.50881	1.75396	2.21723	3.17655	16.6395
0.0524738	0.248047	0.248047	0.350791	0.496094	0.549057	0.677742	0.744141	0.894346	1.02272	1.24023	1.30299	1.50881	1.75396	2.2186	3.17655	16.6856
0.0525394	0.248047	0.248047	0.350791	0.496094	0.549203	0.678417	0.744141	0.894346	1.02272	1.24023	1.30752	1.50881	1.75396	2.2186	3.17655	16.7225
0.0526106	0.248047	0.248047	0.350791	0.496094	0.549731	0.679037	0.744141	0.894346	1.0256	1.24023	1.30762	1.50881	1.75396	2.2186	3.17655	16.7243
0.0529342	0.248047	0.248047	0.350791	0.496094	0.549803	0.67923	0.744141	0.894346	1.02699	1.24023	1.30772	1.50881	1.75396	2.2186	3.17655	16.8019
0.0529406	0.248047	0.248047	0.350791	0.496094	0.552011	0.679498	0.744141	0.894346	1.02699	1.24023	1.30828	1.50881	1.75396	2.2186	3.17655	16.8032
0.0533625	0.248047	0.248047	0.350791	0.496094	0.552171	0.679628	0.744141	0.894346	1.02701	1.24023	1.30877	1.50881	1.75396	2.2186	3.17797	16.869
0.0533764	0.248047	0.248047	0.350791	0.496094	0.553253	0.680119	0.744141	0.894346	1.02812	1.24023	1.31017	1.50881	1.75396	2.2186	3.18812	16.9853
0.0541238	0.248047	0.248047	0.350791	0.496094	0.553685	0.681232	0.744141	0.894346	1.02879	1.24023	1.31026	1.50881	1.75396	2.2186	3.22461	17.1224
0.0544442	0.248047	0.248047	0.350791	0.496094	0.553893	0.681907	0.744328	0.894346	1.02888	1.24023	1.3124	1.50881	1.75396	2.2186	3.22461	17.3162
0.0544582	0.248047	0.248047	0.350791	0.496094	0.55465	0.682092	0.745188	0.894346	1.02899	1.24023	1.31259	1.50881	1.75396	2.2186	3.22461	17.4763
0.054911	0.248047	0.248047	0.350791	0.496094	0.55465	0.682425	0.745422	0.894346	1.0294	1.24023	1.31308	1.50881	1.75396	2.2186	3.22461	17.5711
0.0552356	0.248047	0.248047	0.350791	0.496094	0.55465	0.682483	0.745986	0.894346	1.03501	1.24023	1.31541	1.50881	1.75396	2.2186	3.22461	17.6166
0.0553053	0.248047	0.248047	0.350791	0.496094	0.55465	0.683014	0.747175	0.894346	1.03549	1.24023	1.31548	1.50881	1.75396	2.2186	3.22461	17.6246
0.0555527	0.248047	0.248047	0.350791	0.496094	0.55465	0.684829	0.74721	0.894887	1.03861	1.24023	1.31701	1.50881	1.75396	2.21927	3.22461	17.6549
0.0556654	0.248047	0.248047	0.350791	0.496094	0.55465	0.685137	0.74752	0.899779	1.03921	1.24023	1.32663	1.50881	1.75396	2.2263	3.22461	17.8692
0.0557935	0.248047	0.248047	0.350791	0.496094	0.55465	0.685159	0.74755	0.900879	1.03979	1.24023	1.32725	1.50881	1.75396	2.22846	3.22461	17.9281
0.0558464	0.248047	0.248047	0.350791	0.496094	0.55465	0.685647	0.749121	0.902464	1.04185	1.24023	1.32806	1.50881	1.75396	2.23242	3.22461	18.0938
0.0558973	0.248047	0.248047	0.350791	0.496094	0.55465	0.685739	0.750576	0.90324	1.04209	1.24023	1.32811	1.50881	1.75396	2.23242	3.22461	18.1865
0.0559654	0.248047	0.248047	0.350791	0.496094	0.55465	0.688239	0.752166	0.904538	1.04213	1.24023	1.32936	1.50895	1.75396	2.23242	3.22461	18.1939
0.0561536	0.248047	0.248047	0.350791	0.496094	0.55465	0.690486	0.753232	0.904885	1.04271	1.24023	1.33481	1.51176	1.75396	2.23242	3.22461	18.231
0.0564177	0.248047	0.248047	0.350791	0.496094	0.55465	0.690765	0.754394	0.908205	1.04368	1.24023	1.33577	1.51565	1.75396	2.23242	3.22461	18.4307
0.0566856	0.248047	0.248047	0.350791	0.496094	0.55465	0.690826	0.755108	0.909307	1.04405	1.24023	1.33577	1.52003	1.75396	2.23987	3.22461	18.584
0.056706	0.248047	0.248047	0.351081	0.496094	0.55465	0.69152	0.755405	0.909537	1.0441	1.24023	1.33577	1.52175	1.75396	2.24616	3.23414	18.6448
0.0567064	0.248047	0.248047	0.351598	0.496094	0.55465	0.693677	0.75593	0.90962	1.04514	1.24023	1.33577	1.52364	1.75396	2.24616	3.23414	18.6761
0.0567075	0.248047	0.248047	0.352681	0.496094	0.55465	0.694576	0.755949	0.911576	1.04683	1.24023	1.33577	1.52481	1.75396	2.24616	3.23414	18.7206
0.0567309	0.248047	0.248047	0.352777	0.496094	0.55465	0.694985	0.7566	0.912034	1.05237	1.24023	1.33577	1.52718	1.75396	2.24616	3.23414	18.7682
0.0568624	0.248047	0.248047	0.353684	0.496094	0.55465	0.696073	0.762295	0.912865	1.05237	1.24023	1.33577	1.53382	1.75396	2.24616	3.23414	18.9252
0.0573521	0.248047	0.248047	0.35376	0.496094	0.55465	0.696298	0.762502	0.912887	1.05237	1.24023	1.33577	1.53709	1.75396	2.24616	3.23414	18.9881
0.0574969	0.248047	0.248047	0.354518	0.496094	0.55465	0.696439	0.762534	0.913149	1.05237	1.24023	1.33577	1.54028	1.75396	2.24616	3.23414	19.1912
0.0575025	0.248047	0.248047	0.35479	0.496094	0.55465	0.697522	0.76271	0.914268	1.05237	1.24023	1.33577	1.54062	1.75396	2.25009	3.23414	19.1912
0.0581802	0.248047	0.248047	0.355013	0.496094	0.55465	0.698344	0.763634	0.915355	1.05237	1.24023	1.33577	1.54093	1.75396	2.25815	3.24782	19.2554
0.0581893	0.248047	0.248047	0.355808	0.496094	0.55465	0.700197	0.763964	0.915534	1.05237	1.24023	1.33577	1.54214	1.75396	2.28688	3.26255	19.362
0.0583833	0.248047	0.248047	0.355997	0.496094	0.55465	0.701219	0.763989	0.91839	1.05237	1.24023	1.33577	1.54691	1.75396	2.28688	3.30905	19.4644
0.0585215	0.248047	0.248047	0.3566	0.496094	0.55465	0.701286	0.764191	0.918885	1.05237	1.24023	1.33577	1.55328	1.75396	2.28688	3.30936	19.4968
0.0585261	0.248047	0.248047	0.356692	0.496094	0.55465	0.701419	0.765332	0.922299	1.05237	1.24023	1.33577	1.55545	1.75396	2.28688	3.30936	19.5265
0.059066	0.248047	0.248047	0.356816	0.496094	0.55465	0.701583	0.765812	0.923661	1.05237	1.24023	1.33577	1.55658	1.75396	2.28688	3.3279	19.7521
0.0590774	0.248047	0.248047	0.356921	0.496094	0.55465	0.701583	0.765955	0.924709	1.05237	1.24023	1.33577	1.55964	1.75396	2.28688	3.3279	19.9088
0.0590833	0.248047	0.248047	0.357235	0.496094	0.55465	0.701583	0.76835	0.927045	1.05237	1.24023	1.33577	1.56247	1.75396	2.28688	3.33713	19.9689
0.0592051	0.248047	0.248047	0.357313	0.496094	0.55465	0.701583	0.769006	0.927151	1.05237	1.24023	1.33577	1.56514	1.75396	2.28688	3.33713	20.2154
0.0592604	0.248047	0.248047	0.357456	0.496094	0.55465	0.701583	0.76955	0.927326	1.05237	1.24023	1.33577	1.56879	1.75827	2.28688	3.33713	20.4334
0.0592989	0.248047	0.248047	0.357686	0.496094	0.55465	0.701583	0.76992	0.929071	1.05237	1.24023	1.33577	1.56879	1.75917	2.28688	3.33713	20.5295
0.0594435	0.248047	0.248047	0.358141	0.496094	0.55465	0.701583	0.770578	0.929699	1.05237	1.24023	1.33577	1.56879	1.76485	2.28688	3.33713	20.5385
0.0595799	0.248047	0.248047	0.358797	0.496094	0.55465	0.701583	0.770749	0.930928	1.05237	1.24023	1.33577	1.56879	1.76692	2.28688	3.33713	20.552
0.0600296	0.248047	0.248047	0.358954	0.496094	0.55465	0.701583	0.771188	0.931305	1.05237	1.24023	1.33577	1.56879	1.77701	2.28688	3.33713	20.5894
0.0605678	0.248047	0.248047	0.359768	0.496094	0.55465	0.701583	0.772555	0.932247	1.05237	1.24023	1.33577	1.56879	1.78348	2.28688	3.33713	20.6118
0.0606689	0.248047	0.248047	0.359996	0.496094	0.55465	0.701583	0.772826	0.933472	1.05237	1.24023	1.33577	1.56879	1.7835	2.28688	3.33713	20.6952
0.0611183	0.248047	0.248047	0.361513	0.496094	0.55465	0.701583	0.77346	0.936366	1.05237	1.24023	1.33577	1.56879	1.78691	2.28688	3.33713	20.7679
0.0612336	0.248047	0.248047	0.362865	0.496094	0.55465	0.701583	0.775206	0.936974	1.05237	1.24023	1.33577	1.56879	1.78771	2.28688	3.33713	20.7679
0.0614238	0.248047	0.248047	0.363327	0.496094	0.55465	0.701583	0.775345	0.938251	1.05237	1.24023	1.33577	1.56879	1.78869	2.28688	3.33713	20.7709
0.0619687	0.248047	0.248047	0.363673	0.496094	0.55465	0.701583	0.778974	0.938541	1.05237	1.24023	1.33577	1.56879	1.78869	2.28688	3.33713	20.8787
0.0621882	0.248047	0.248047	0.364009	0.496094	0.55465	0.701583	0.779351	0.94066	1.05237	1.24023	1.33577	1.56879	1.78869	2.28688	3.33713	20.9082
0.0637012	0.248047	0.248047	0.365065	0.496094	0.55465	0.701583	0.781148	0.940894	1.05237	1.24023	1.33577	1.56879	1.78869	2.28688	3.3738	21.0069
0.0638732	0.248047	0.248047	0.365474	0.496094	0.55465	0.701583	0.781295	0.941505	1.05237	1.24023	1.33577	1.56879	1.78869	2.28813	3.3738	21.1931
0.064173	0.248047	0.248047	0.365504	0.496094	0.55465	0.701583	0.782548	0.942037	1.05299	1.24023	1.33577	1.56879	1.78869	2.28829	3.3738	21.2931
0.0642468	0.248047	0.248047	0.365531	0.496094	0.55465	0.701583	0.782771	0.944155	1.05622	1.24023	1.33577	1.56879	1.78869	2.30031	3.39583	21.5801
0.0643719	0.248047	0.248047	0.366077	0.496094	0.55465	0.701583	0.783112	0.944758	1.05781	1.24023	1.33577	1.56879	1.78869	2.30385	3.44598	21.6598
0.0645194	0.248047	0.248047	0.366086	0.496094	0.55465	0.701583	0.783669	0.945043	1.05911	1.24023	1.33577	1.56879	1.78869	2.30601	3.44598	21.6598
0.0650177	0.248047	0.248047	0.366238	0.496094	0.55465	0.701583	0.783916	0.946372	1.06164	1.24023	1.33577	1.56879	1.78869	2.31347	3.44598	21.7335
0.0650216	0.248047	0.248047	0.366644	0.496094	0.55465	0.701583	0.784393	0.949507	1.06209	1.24023	1.33577	1.56879	1.78869	2.31872	3.44598	21.7434
0.0653086	0.248047	0.248047	0.367353	0.496094	0.55465	0.701583	0.784393	0.94994	1.0657	1.24023	1.33577	1.56879	1.78869	2.31965	3.45489	21.9308
0.0656395	0.248047	0.248047	0.367489	0.496094	0.55465	0.701583	0.784393	0.950374	1.06775	1.24023	1.33577	1.56879	1.78869	2.32119	3.45489	21.963
0.065721	0.248047	0.248047	0.367655	0.496094	0.55465	0.701583	0.784393	0.950709	1.06808	1.24023	1.33577	1.56879	1.78869	2.33231	3.45489	22.1763
0.0657605	0.248047	0.248047	0.368066	0.496094	0.55465	0.701583	0.784393	0.951723	1.06886	1.24023	1.33577	1.56879	1.78869	2.33893	3.45489	22.4616
0.0658205	0.248047	0.248047	0.368071	0.496094	0.55465	0.701583	0.784393	0.953668	1.07047	1.24023	1.33577	1.56879	1.78869	2.34007	3.47266	22.5218
0.0660076	0.248047	0.248047	0.368171	0.496094	0.55465	0.701583	0.784393	0.954198	1.07064	1.24023	1.33577	1.56879	1.79448	2.34007	3.47266	22.7984
0.0660329	0.248047	0.248047	0.368313	0.496094	0.55465	0.701583	0.784393	0.956171	1.07122	1.24023	1.33577	1.56879	1.79628	2.34007	3.47266	23.027
0.0661343	0.248047	0.248047	0.368566	0.496094	0.55465	0.701583	0.784393	0.956702	1.07211	1.24023	1.33577	1.56879	1.79634	2.34007	3.47266	23.059
0.0661844	0.248047	0.248047	0.36876	0.496094	0.55465	0.701583	0.784393	0.957974	1.07586	1.24023	1.33577	1.56879	1.80003	2.34007	3.47266	23.0897
0.0664036	0.248047	0.248047	0.369004	0.496094	0.55465	0.701583	0.784393	0.960288	1.07611	1.24023	1.33577	1.56879	1.80291	2.34007	3.47266	23.2821
0.0667972	0.248047	0.248047	0.36914	0.496094	0.55465	0.701583	0.784393	0.967287	1.07881	1.24023	1.33577	1.56879	1.80545	2.34007	3.47266	23.4265
0.0668515	0.248047	0.248047	0.369363	0.496094	0.55465	0.701583	0.784393	0.9687	1.07897	1.24023	1.33577	1.56879	1.80581	2.34007	3.4815	23.444
0.0670461	0.248047	0.248047	0.369502	0.496094	0.55465	0.701583	0.784393	0.968717	1.08209	1.24023	1.33577	1.56879	1.80581	2.34007	3.4815	23.444
0.0670759	0.248047	0.248047	0.369826	0.496094	0.55465	0.701583	0.784393	0.969535	1.08241	1.24023	1.33577	1.56879	1.80581	2.34007	3.4815	23.4545
0.0670819	0.248047	0.248047	0.369915	0.496094	0.55465	0.701583	0.784393	0.970942	1.08368	1.24023	1.33577	1.57347	1.80581	2.34007	3.50791	23.4976
0.067551	0.248047	0.248047	0.370535	0.496094	0.55465	0.701583	0.784393	0.97129	1.08432	1.24023	1.33577	1.57517	1.80581	2.34007	3.50791	23.7828
0.0679225	0.248047	0.248047	0.370882	0.496094	0.55465	0.701583	0.784393	0.971862	1.08478	1.24023	1.33577	1.57709	1.80581	2.34007	3.50791	23.8228
0.0680599	0.248047	0.248047	0.371033	0.496094	0.55465	0.701583	0.784393	0.972253	1.08641	1.24023	1.33577	1.5781	1.80581	2.34007	3.50791	23.8719
0.0682893	0.248047	0.248047	0.371797	0.496094	0.55465	0.701583	0.784393	0.973783	1.08677	1.24023	1.33577	1.58137	1.80581	2.34007	3.50791	23.9388
0.0684426	0.248047	0.248047	0.372054	0.496094	0.55465	0.701583	0.784393	0.973911	1.08861	1.24023	1.33577	1.58827	1.80581	2.34007	3.50791	23.9978
0.0687412	0.248047	0.248047	0.372558	0.496094	0.55465	0.701583	0.784393	0.975402	1.09017	1.24023	1.33577	1.58827	1.80581	2.34007	3.50791	24.0298
0.0689183	0.248047	0.248047	0.373891	0.496094	0.55465	0.701583	0.784393	0.978536	1.09041	1.24023	1.33577	1.58827	1.80581	2.34007	3.50791	24.0759
0.0690591	0.248047	0.248047	0.374269	0.496094	0.55465	0.701583	0.784393	0.97908	1.0911	1.24023	1.33577	1.58827	1.80581	2.34007	3.50791	24.1371
0.0692678	0.248047	0.248047	0.374645	0.496094	0.55465	0.701583	0.784393	0.981231	1.09216	1.24023	1.33577	1.58827	1.80581	2.34007	3.50791	24.1919
0.0694259	0.248047	0.248047	0.37505	0.496094	0.55465	0.701583	0.784393	0.981603	1.09354	1.24023	1.33577	1.58827	1.80794	2.34007	3.52541	24.2135
0.0695206	0.248047	0.248047	0.376137	0.496094	0.55465	0.701583	0.784393	0.983466	1.09386	1.24023	1.33577	1.58827	1.81269	2.34007	3.55149	24.2148
0.069587	0.248047	0.248047	0.376672	0.496094	0.55465	0.701583	0.784393	0.984362	1.09607	1.24023	1.33577	1.58827	1.81485	2.34007	3.55149	24.3245
0.0696215	0.248047	0.248047	0.377286	0.496094	0.55465	0.703366	0.784393	0.984923	1.09618	1.24023	1.33577	1.58827	1.81572	2.34007	3.55149	24.4088
0.0697242	0.248047	0.248047	0.377363	0.496094	0.55465	0.703834	0.784393	0.986511	1.0963	1.24023	1.33577	1.58827	1.81847	2.35318	3.55149	24.5178
0.0700516	0.248047	0.248047	0.377454	0.496094	0.55465	0.704103	0.784393	0.987575	1.09687	1.24023	1.33577	1.58827	1.82425	2.35318	3.55149	24.5278
0.0703073	0.248047	0.248047	0.377492	0.496094	0.55465	0.704417	0.784393	0.987807	1.10025	1.24023	1.33577	1.58827	1.82621	2.35318	3.55149	24.5779
0.0703608	0.248047	0.248047	0.377843	0.496094	0.55465	0.704914	0.784393	0.988758	1.10051	1.24023	1.33577	1.58827	1.83313	2.35318	3.55149	24.7376
0.0704492	0.248047	0.248047	0.377863	0.496094	0.55465	0.70512	0.784393	0.992179	1.10092	1.24023	1.33577	1.58827	1.83601	2.35318	3.66237	24.7463
0.0705131	0.248047	0.248047	0.378208	0.496094	0.55465	0.707149	0.784393	0.992188	1.10171	1.24023	1.33577	1.58827	1.83645	2.35318	3.66237	24.7463
0.0705187	0.248047	0.248047	0.379041	0.496094	0.55465	0.707559	0.784393	0.992188	1.10195	1.24023	1.33577	1.58827	1.83913	2.35318	3.66237	24.8357
0.0707026	0.248047	0.248047	0.379212	0.496094	0.55465	0.708782	0.784393	0.992188	1.10203	1.24023	1.33577	1.58827	1.84032	2.35339	3.66237	24.8505
0.070876	0.248047	0.248047	0.379222	0.496094	0.55465	0.708868	0.784393	0.992188	1.10543	1.24023	1.33577	1.58827	1.84607	2.35836	3.68748	24.8604
0.0710299	0.248047	0.248047	0.380739	0.496094	0.55465	0.709389	0.784393	0.992188	1.10635	1.24023	1.33577	1.58827	1.85281	2.36497	3.68748	24.9457
0.0712928	0.248047	0.248047	0.381307	0.496094	0.55465	0.711184	0.784393	0.992188	1.10732	1.24023	1.33577	1.58827	1.85294	2.38372	3.68748	24.9481
0.071397	0.248047	0.248047	0.382046	0.496094	0.55465	0.711314	0.784393	0.992188	1.1093	1.24023	1.33577	1.58827	1.85423	2.38385	3.68748	24.9592
0.0717203	0.248047	0.248047	0.382136	0.496094	0.55465	0.711727	0.784393	0.992188	1.1093	1.24023	1.33577	1.58827	1.85615	2.38597	3.68748	25.0353
0.0719203	0.248047	0.248047	0.382324	0.496094	0.55465	0.712091	0.784393	0.992188	1.1093	1.24023	1.33577	1.58827	1.85735	2.38699	3.68748	25.0429
0.0723594	0.248047	0.248047	0.382415	0.496094	0.55465	0.712898	0.784393	0.992188	1.1093	1.24023	1.33577	1.58827	1.85862	2.39274	3.68748	25.1244
0.072685	0.248047	0.248047	0.383261	0.496094	0.55465	0.712908	0.784393	0.992188	1.1093	1.24023	1.33577	1.58827	1.876	2.41619	3.68748	25.185
0.0729571	0.248047	0.248047	0.383934	0.496094	0.55465	0.712966	0.784393	0.992188	1.1093	1.24023	1.33577	1.58827	1.88623	2.42586	3.68748	25.3275
0.0730339	0.248047	0.248047	0.383977	0.496094	0.55465	0.713048	0.784393	0.992188	1.1093	1.24023	1.33577	1.58827	1.88907	2.44298	3.68748	25.4148
0.0733858	0.248047	0.248047	0.384166	0.496094	0.55465	0.714229	0.784393	0.992188	1.1093	1.24023	1.33577	1.58827	1.88907	2.44298	3.68748	25.4751
0.0735212	0.248047	0.248047	0.384195	0.496094	0.55465	0.714657	0.784393	0.992188	1.1093	1.24023	1.33577	1.58827	1.88907	2.44298	3.7207	25.6594
0.0735496	0.248047	0.248047	0.385029	0.496094	0.55465	0.715135	0.784393	0.992188	1.1093	1.24023	1.33577	1.58827	1.88907	2.44298	3.7207	25.6654
0.0736747	0.248047	0.248047	0.386199	0.496094	0.55465	0.71568	0.784393	0.992188	1.1093	1.24023	1.33577	1.58827	1.88907	2.44298	3.7207	25.8496
0.0737039	0.248047	0.248047	0.386314	0.496094	0.55465	0.716194	0.784393	0.992188	1.1093	1.24023	1.33577	1.58827	1.88907	2.44298	3.72896	25.8505
0.0737423	0.248047	0.248047	0.386432	0.496094	0.55465	0.717429	0.784393	0.992188	1.1093	1.24023	1.33577	1.58827	1.88907	2.45554	3.72896	25.885
0.07402	0.248047	0.248047	0.386637	0.496094	0.55465	0.718207	0.784393	0.992188	1.1093	1.24023	1.33577	1.58827	1.88907	2.45554	3.72896	25.8969
0.0741251	0.248047	0.248047	0.386731	0.496094	0.55465	0.718765	0.784393	0.992188	1.1093	1.24023	1.33577	1.58827	1.88907	2.45554	3.72896	25.9881
0.074396	0.248047	0.248047	0.387376	0.496094	0.55465	0.719838	0.784393	0.992188	1.1093	1.24023	1.33577	1.58827	1.88907	2.45554	3.72896	26.0461
0.0745562	0.248047	0.248047	0.387765	0.496094	0.55465	0.720127	0.784393	0.992188	1.1093	1.24023	1.33577	1.58827	1.88907	2.46796	3.78627	26.0744
0.0745959	0.248047	0.248047	0.388	0.496094	0.55465	0.720603	0.784393	0.992188	1.1093	1.24023	1.33577	1.58827	1.88907	2.4686	3.78627	26.1628
0.0747165	0.248047	0.248047	0.388245	0.496094	0.55465	0.724184	0.784393	0.992188	1.1093	1.24023	1.33577	1.58827	1.89124	2.46945	3.78627	26.2051
0.0748898	0.248047	0.248047	0.388339	0.496094	0.55465	0.724277	0.784393	0.992188	1.1093	1.24023	1.33577	1.58827	1.89181	2.48047	3.79439	26.2302
0.0749598	0.248047	0.248047	0.388912	0.496094	0.55465	0.724551	0.784393	0.992188	1.1093	1.24023	1.33577	1.58827	1.90008	2.48047	3.79439	26.3089
0.0750506	0.248047	0.248451	0.388944	0.496094	0.55465	0.726888	0.784393	0.992188	1.1093	1.24023	1.33577	1.58827	1.90576	2.48047	3.85072	26.3502
0.0753038	0.248047	0.248746	0.389952	0.496094	0.55465	0.726932	0.784393	0.992188	1.1093	1.24023	1.33577	1.58827	1.9076	2.48047	3.85072	26.3934
0.0754553	0.248047	0.249194	0.390081	0.496094	0.55465	0.72736	0.784393	0.992188	1.1093	1.24023	1.33577	1.58827	1.90826	2.48047	3.87462	26.4344
0.0754553	0.248047	0.249273	0.390175	0.496094	0.55465	0.728574	0.784393	0.992188	1.1093	1.24023	1.33577	1.58827	1.91531	2.48047	3.87462	26.5457
0.075555	0.248047	0.249869	0.390294	0.496094	0.55465	0.728757	0.784393	0.992188	1.1093	1.24023	1.33577	1.58827	1.91609	2.48047	3.87462	26.57
0.0757792	0.248047	0.250142	0.390339	0.496094	0.55465	0.729181	0.784393	0.992188	1.1093	1.24023	1.33577	1.58827	1.91707	2.48047	3.88255	26.6105
0.0759122	0.248047	0.250263	0.390548	0.496094	0.55465	0.730039	0.784393	0.992188	1.1093	1.24023	1.33577	1.58827	1.92692	2.48047	3.88255	26.6694
0.0760519	0.248047	0.250863	0.390823	0.496094	0.55465	0.731235	0.784393	0.992188	1.1093	1.24023	1.33577	1.58827	1.93215	2.48047	3.92197	26.7394
0.0760556	0.248047	0.251071	0.39137	0.496094	0.55465	0.731265	0.784393	0.992188	1.1093	1.24023	1.33577	1.58827	1.93459	2.48047	3.92197	26.9273
0.0767469	0.248047	0.251148	0.391596	0.496094	0.55465	0.732052	0.784393	0.992188	1.1093	1.24023	1.33637	1.58827	1.93731	2.48047	3.92197	27.3633
0.0767649	0.248047	0.251494	0.391712	0.496094	0.55465	0.73245	0.784393	0.992188	1.1093	1.24023	1.33768	1.58827	1.93731	2.48047	3.92197	27.5511
0.0767746	0.248047	0.251525	0.392448	0.496094	0.55465	0.732463	0.784393	0.992188	1.1093	1.24023	1.34088	1.58827	1.93731	2.48047	3.97649	27.6326
0.0770777	0.248047	0.252065	0.392542	0.496094	0.55465	0.732644	0.784393	0.992188	1.1093	1.24023	1.34356	1.58827	1.93731	2.48047	3.97649	28.0216
0.0771088	0.248047	0.252168	0.393275	0.496094	0.55465	0.734417	0.784393	0.992188	1.1093	1.24023	1.3449	1.58827	1.93731	2.48047	3.99964	28.0655
0.0775738	0.248047	0.252186	0.393756	0.496094	0.55465	0.735822	0.784468	0.992188	1.1093	1.24023	1.34722	1.58827	1.93731	2.48047	4.00732	28.2229
0.0781489	0.248047	0.252219	0.394551	0.496094	0.55465	0.735855	0.784628	0.992188	1.1093	1.24023	1.34966	1.58827	1.93731	2.48047	4.00732	28.3773
0.078255	0.248047	0.252481	0.394986	0.496094	0.55465	0.735882	0.784952	0.992188	1.1093	1.24023	1.35159	1.58827	1.93731	2.48047	4.00732	28.6079
0.0782654	0.248047	0.252488	0.395252	0.496094	0.55465	0.736628	0.785157	0.992188	1.1093	1.24023	1.35646	1.58827	1.93731	2.48047	4.04313	28.7734
0.0783833	0.248047	0.252696	0.395398	0.496094	0.55465	0.736929	0.786285	0.992188	1.1093	1.24023	1.3586	1.58827	1.93731	2.48047	4.09089	28.927
0.0784403	0.248047	0.252888	0.395423	0.496094	0.55465	0.738375	0.78638	0.992188	1.1093	1.24023	1.36022	1.58827	1.93731	2.48047	4.10591	29.0035
0.0786043	0.248047	0.254053	0.395688	0.496094	0.55465	0.739067	0.786919	0.992188	1.1093	1.24023	1.36158	1.58827	1.93731	2.48047	4.10591	29.0903
0.0786357	0.248047	0.254309	0.395714	0.496094	0.55465	0.739755	0.787471	0.992188	1.1093	1.24023	1.36442	1.58827	1.93731	2.48047	4.14098	29.1072
0.0786415	0.248047	0.254337	0.395856	0.496094	0.55465	0.740153	0.787871	0.992188	1.1093	1.24023	1.36484	1.58827	1.93731	2.48047	4.15802	29.2401
0.078687	0.248047	0.254388	0.396114	0.496094	0.55465	0.741611	0.788898	0.992188	1.1093	1.24023	1.36702	1.58827	1.93731	2.48047	4.15802	29.5998
0.078744	0.248047	0.254978	0.396315	0.496094	0.55561	0.742013	0.790154	0.992188	1.1093	1.24023	1.36775	1.58827	1.93731	2.48047	4.15802	29.6258
0.0789012	0.248047	0.25586	0.396686	0.496094	0.555661	0.742372	0.790971	0.992188	1.1093	1.24023	1.37042	1.58827	1.93731	2.48047	4.15802	29.7842
0.0791057	0.248047	0.256482	0.397109	0.496094	0.55663	0.743038	0.791515	0.992188	1.1093	1.24023	1.38409	1.58827	1.93731	2.48047	4.2168	30.0212
0.0791142	0.248047	0.256721	0.397149	0.496094	0.557051	0.743373	0.792478	0.992188	1.1093	1.24023	1.3845	1.58827	1.93731	2.49284	4.2168	30.1619
0.0792339	0.248047	0.256832	0.397735	0.496094	0.55726	0.744141	0.794034	0.992188	1.1093	1.24023	1.38602	1.58827	1.93731	2.49284	4.22409	30.1701
0.0792899	0.248047	0.257106	0.398151	0.496094	0.557526	0.744141	0.795653	0.992188	1.1093	1.24023	1.3873	1.58827	1.93731	2.49284	4.23863	30.3267
0.0795772	0.248047	0.257507	0.398275	0.496094	0.557576	0.744141	0.795867	0.992188	1.1093	1.24023	1.38906	1.58827	1.93731	2.49284	4.23863	30.3551
0.0800521	0.248047	0.257625	0.398519	0.496094	0.558905	0.744141	0.798436	0.992188	1.1093	1.24023	1.39135	1.58827	1.93731	2.49284	4.26756	30.4047
0.0803527	0.248047	0.25783	0.399477	0.496094	0.558927	0.744141	0.798537	0.992188	1.1093	1.24023	1.39212	1.58827	1.93731	2.49284	4.28195	30.4078
0.0803826	0.248047	0.25785	0.400088	0.496094	0.559229	0.744141	0.798745	0.992188	1.1093	1.24023	1.39307	1.58827	1.93731	2.49284	4.33195	30.7998
0.0803835	0.248047	0.258639	0.400678	0.496094	0.559764	0.744141	0.799126	0.992188	1.1093	1.24023	1.39774	1.58827	1.93731	2.49284	4.33195	30.8068
0.0804242	0.248047	0.259328	0.400935	0.496094	0.559858	0.744141	0.800606	0.992188	1.1093	1.24023	1.3979	1.58827	1.93731	2.49284	4.3884	30.8387
0.0804462	0.248047	0.259785	0.401074	0.496094	0.560534	0.744141	0.801319	0.992188	1.1093	1.24023	1.3987	1.58827	1.93731	2.49284	4.3884	30.8746
0.0805489	0.248047	0.260035	0.401426	0.496094	0.562499	0.744141	0.80223	0.992188	1.1093	1.24023	1.39902	1.58827	1.93731	2.49284	4.3884	30.9055
0.0805755	0.248047	0.260354	0.401715	0.496094	0.563409	0.744141	0.803211	0.992188	1.1093	1.24023	1.40317	1.58827	1.93731	2.49284	4.3884	30.9144
0.0812263	0.248047	0.260818	0.402004	0.496094	0.563623	0.744141	0.805685	0.992188	1.1093	1.24023	1.40317	1.58827	1.93731	2.49284	4.4372	30.9502
0.0813906	0.248047	0.262078	0.402024	0.496094	0.565447	0.744141	0.806656	0.992188	1.1093	1.24023	1.40317	1.58827	1.93731	2.49284	4.47173	31.0683
0.0814819	0.248047	0.262215	0.403267	0.496094	0.566571	0.744141	0.80778	0.992188	1.1093	1.24023	1.40317	1.58827	1.93731	2.49284	4.47173	31.1286
0.081514	0.248047	0.262415	0.404226	0.496094	0.568378	0.744141	0.807792	0.992188	1.1093	1.24023	1.40317	1.58827	1.93731	2.49284	4.47173	31.3796
0.0818988	0.248047	0.262615	0.404307	0.496094	0.568807	0.744141	0.808035	0.992188	1.1093	1.24023	1.40317	1.58827	1.93731	2.49284	4.52643	31.4169
0.0819254	0.248047	0.262617	0.404464	0.496094	0.569502	0.744141	0.808521	0.992188	1.1093	1.24023	1.40317	1.58827	1.93731	2.49284	4.55354	31.5735
0.0821181	0.248047	0.262859	0.404809	0.496094	0.569803	0.744141	0.809195	0.992188	1.1093	1.24023	1.40317	1.58827	1.93731	2.49284	4.55354	31.5878
0.0822394	0.248047	0.262969	0.405243	0.496094	0.571142	0.744141	0.812007	0.992188	1.11357	1.24023	1.40317	1.59018	1.93731	2.49284	4.56029	31.751
0.0824719	0.248047	0.263305	0.40556	0.496094	0.572452	0.744141	0.812772	0.992188	1.11513	1.24023	1.40317	1.59591	1.93731	2.50936	4.57376	31.8747
0.0824901	0.248047	0.263473	0.405927	0.496094	0.572643	0.744141	0.812981	0.992188	1.1156	1.2407	1.40317	1.59857	1.93731	2.52959	4.57376	31.8863
0.0826329	0.248047	0.263663	0.406013	0.496094	0.572683	0.744141	0.813009	0.992188	1.11577	1.2422	1.40317	1.60285	1.93731	2.52959	4.57376	31.948
0.0826532	0.248047	0.263907	0.406607	0.496094	0.573525	0.744141	0.814318	0.992188	1.11693	1.24494	1.40317	1.60469	1.93731	2.52959	4.70636	31.9548
0.082827	0.248047	0.264027	0.407015	0.496094	0.573615	0.744141	0.816379	0.992188	1.11722	1.24511	1.40317	1.6121	1.93731	2.52959	4.70636	31.9596
0.0828685	0.248047	0.264123	0.407539	0.496094	0.573823	0.744141	0.81694	0.992188	1.11799	1.24652	1.40317	1.61288	1.93731	2.52959	4.71941	32.0057
0.0829894	0.248047	0.264399	0.407871	0.496094	0.574745	0.744141	0.817744	0.992188	1.11823	1.24672	1.40317	1.61489	1.93731	2.52959	4.73893	32.1142
0.0831458	0.248047	0.264484	0.408089	0.496094	0.575096	0.744141	0.817749	0.992188	1.11939	1.24793	1.40317	1.61496	1.93731	2.52959	4.76482	32.1601
0.0831939	0.248047	0.264638	0.408456	0.496094	0.575933	0.744141	0.818175	0.992188	1.12067	1.24959	1.40317	1.62321	1.93731	2.52959	4.76482	32.2156
0.0838884	0.248047	0.264908	0.408644	0.496094	0.57784	0.744141	0.819689	0.992188	1.1223	1.25047	1.40317	1.62336	1.93731	2.52959	4.76482	32.2699
0.0841683	0.248047	0.265291	0.409859	0.496094	0.579539	0.744141	0.821109	0.992188	1.12285	1.2548	1.40317	1.62407	1.93775	2.52959	4.76482	32.2747
0.0842178	0.248047	0.266594	0.410556	0.496094	0.57991	0.744141	0.82139	0.992188	1.12297	1.25978	1.40317	1.62444	1.94664	2.52959	4.77128	32.289
0.0843437	0.248047	0.266677	0.410945	0.496094	0.580233	0.744141	0.821435	0.992188	1.12314	1.26131	1.40509	1.62664	1.95403	2.52959	4.87335	32.3204
0.0844621	0.248047	0.266933	0.41175	0.496094	0.580664	0.744141	0.822907	0.992188	1.12323	1.26159	1.4077	1.62683	1.95673	2.52959	4.8979	32.3414
0.0847168	0.248047	0.267365	0.413092	0.496094	0.580969	0.744141	0.824357	0.992188	1.1251	1.26474	1.41347	1.62787	1.95818	2.52959	4.91108	32.3414
0.0847312	0.248047	0.267523	0.413461	0.496094	0.581084	0.744141	0.824447	0.992188	1.12559	1.2648	1.41439	1.63322	1.95878	2.52959	4.92359	32.4269
0.0847522	0.248047	0.267655	0.413944	0.496094	0.581332	0.744141	0.826098	0.992188	1.12882	1.2648	1.41452	1.63737	1.9594	2.52959	4.96713	32.5206
0.0848632	0.248047	0.268134	0.413997	0.496094	0.581434	0.744141	0.827627	0.992188	1.12996	1.2648	1.41711	1.6484	1.96559	2.52959	5.02257	32.6537
0.0848909	0.248047	0.268611	0.415013	0.496094	0.581532	0.744141	0.827863	0.992188	1.13075	1.2648	1.41911	1.64996	1.96876	2.5465	5.05918	32.6679
0.0851795	0.248047	0.268885	0.415616	0.496094	0.581678	0.744141	0.828712	0.992188	1.13258	1.2648	1.42121	1.6524	1.96927	2.5538	5.17937	32.6914
0.0851972	0.248047	0.26945	0.415627	0.496094	0.582794	0.744141	0.82927	0.992188	1.13545	1.2648	1.42213	1.65251	1.97171	2.5538	5.30264	32.698
0.0852806	0.248047	0.269565	0.415819	0.496094	0.583473	0.744141	0.829407	0.992188	1.13771	1.2648	1.42351	1.65562	1.97258	2.5538	5.66178	32.8116
0.0854321	0.248047	0.269655	0.416077	0.496094	0.584004	0.744141	0.829688	0.992188	1.13795	1.2648	1.4257	1.65608	1.97628	2.5538	5.68463	33.021
0.0856187	0.248047	0.269679	0.416902	0.496094	0.584486	0.744141	0.83071	0.992188	1.13945	1.2648	1.43013	1.65746	1.97673	2.5538	5.72661	33.191
0.0858677	0.248047	0.269783	0.41705	0.496094	0.584664	0.744141	0.831729	0.992188	1.13974	1.2648	1.43371	1.65759	1.98101	2.5538	5.78535	33.4431
0.0858798	0.248047	0.270284	0.417383	0.496094	0.584757	0.744141	0.832102	0.992188	1.1406	1.2648	1.43508	1.66161	1.98377	2.5538	5.79071	33.4496
0.0858952	0.248047	0.270336	0.418125	0.496094	0.585788	0.744141	0.832796	0.992188	1.14126	1.2648	1.43719	1.66395	1.98438	2.5538	5.85412	33.5772
0.0860316	0.248047	0.270435	0.418248	0.496094	0.586184	0.744141	0.833211	0.992188	1.14377	1.2648	1.44391	1.66395	1.98438	2.5538	5.96345	33.6833
0.0860694	0.248047	0.270529	0.418539	0.496094	0.5874	0.744141	0.833613	0.992188	1.14397	1.2648	1.44537	1.66395	1.98438	2.5538	5.97376	33.7017
0.0862962	0.248047	0.270574	0.418981	0.496094	0.587925	0.744141	0.834102	0.992188	1.14411	1.2648	1.44608	1.66395	1.98438	2.5538	6.00458	33.7426
0.0864103	0.248047	0.270741	0.41899	0.496094	0.588462	0.744141	0.836534	0.992188	1.14477	1.2648	1.44635	1.66395	1.98438	2.5538	6.00458	33.8518
0.0864708	0.248047	0.270861	0.419207	0.496094	0.588529	0.744141	0.836832	0.992188	1.14651	1.2648	1.44635	1.66395	1.98438	2.5538	6.13634	33.9126
0.0864724	0.248047	0.271042	0.419349	0.496094	0.588767	0.744141	0.837396	0.992188	1.14661	1.2648	1.44635	1.66395	1.98438	2.5538	6.14135	33.9317
0.0865589	0.248047	0.271231	0.420304	0.496094	0.589155	0.744141	0.838957	0.992188	1.14714	1.2648	1.44635	1.66395	1.98438	2.5538	6.14135	34.0322
0.0865937	0.248047	0.272794	0.420324	0.496094	0.589379	0.744141	0.839247	0.992188	1.14941	1.2648	1.44635	1.66395	1.98438	2.5538	6.22098	34.1729
0.0866094	0.248047	0.272847	0.421037	0.496094	0.589837	0.744141	0.839919	0.992188	1.15368	1.2648	1.44635	1.66395	1.98438	2.5538	6.28005	34.2781
0.0866427	0.248047	0.27357	0.421691	0.496094	0.590184	0.744141	0.840842	0.992188	1.15369	1.2648	1.44635	1.66395	1.98438	2.5538	6.31424	34.3032
0.0866732	0.248047	0.27409	0.422739	0.496094	0.590284	0.744141	0.840954	0.992188	1.15692	1.2648	1.44635	1.66395	1.98438	2.5538	6.32398	34.3104
0.0873591	0.248047	0.274346	0.422897	0.496094	0.593749	0.744141	0.841343	0.992188	1.16191	1.2648	1.44635	1.66395	1.98613	2.5538	6.33856	34.331
0.0874506	0.248047	0.274398	0.42384	0.496094	0.594274	0.744141	0.843112	0.992188	1.16399	1.2648	1.44635	1.66395	1.98676	2.5538	6.38624	34.3579
0.0874607	0.248047	0.274541	0.423965	0.496094	0.594929	0.744141	0.843141	0.992188	1.16421	1.2648	1.44635	1.66395	1.9932	2.5538	6.40134	34.5934
0.087485	0.248047	0.274575	0.424005	0.496094	0.595046	0.744141	0.843375	0.992188	1.16483	1.2648	1.44635	1.66395	1.99447	2.5538	6.49201	34.5996
0.0876833	0.248047	0.274741	0.42418	0.496094	0.595221	0.744141	0.844352	0.992188	1.16512	1.2648	1.44635	1.66395	1.99582	2.57574	6.49201	34.6929
0.0877751	0.248047	0.274788	0.424537	0.496094	0.596437	0.744141	0.844494	0.992188	1.16556	1.2648	1.44635	1.66395	1.99599	2.58299	6.49201	34.7266
0.0878111	0.248047	0.275715	0.424826	0.496094	0.596648	0.744141	0.845349	0.992188	1.16774	1.2648	1.44635	1.66395	1.99632	2.58887	6.51094	34.7567
0.087992	0.248047	0.275758	0.428534	0.496094	0.596995	0.744141	0.845819	0.992188	1.16934	1.2648	1.44635	1.66395	1.99642	2.58969	6.59077	34.815
0.0881116	0.248047	0.275914	0.429144	0.496094	0.59729	0.744141	0.846135	0.992188	1.17557	1.2648	1.44635	1.66395	1.99815	2.58969	6.59077	34.8557
0.0885459	0.248047	0.277299	0.429242	0.496094	0.597396	0.744141	0.846302	0.992188	1.17797	1.2648	1.44635	1.66395	1.99982	2.58969	6.67887	35.0124
0.0886276	0.248047	0.277605	0.429381	0.496094	0.597727	0.744141	0.849147	0.992188	1.18435	1.2648	1.44635	1.66395	1.99982	2.58969	6.67887	35.0133
0.0886734	0.248047	0.277722	0.430158	0.496094	0.597855	0.744141	0.852892	0.992188	1.18508	1.2648	1.44635	1.66395	1.99982	2.58969	6.71266	35.0835
0.0887928	0.248047	0.277853	0.430281	0.496094	0.598023	0.744141	0.852947	0.992188	1.18857	1.2648	1.44635	1.66395	1.99982	2.58969	6.73423	35.0835
0.0891253	0.248047	0.27795	0.43057	0.496094	0.598853	0.744141	0.854825	0.992188	1.19247	1.2648	1.44635	1.67425	1.99982	2.58969	6.73848	35.2279
0.0891891	0.248047	0.278378	0.43057	0.496094	0.598946	0.744141	0.855748	0.992188	1.19285	1.2648	1.44635	1.68203	1.99982	2.58969	6.81113	35.2968
0.089244	0.248047	0.279026	0.430918	0.496094	0.599089	0.744141	0.855976	0.992188	1.19542	1.2648	1.44635	1.68297	1.99982	2.58969	6.81113	35.3804
0.0892529	0.248047	0.279484	0.431176	0.496094	0.599456	0.744141	0.857647	0.992188	1.20071	1.2648	1.44635	1.68599	1.99982	2.58969	6.84268	35.4221
0.0892722	0.248047	0.279867	0.43123	0.496094	0.599563	0.744141	0.859318	0.992188	1.20455	1.2648	1.44635	1.68619	1.99982	2.58969	6.94974	35.5409
0.0893252	0.248047	0.279994	0.431349	0.496094	0.600392	0.744141	0.859492	0.992188	1.20458	1.2648	1.44635	1.68637	1.99982	2.58969	6.94974	35.8511
0.0894758	0.248047	0.280421	0.431591	0.496094	0.601011	0.744141	0.860663	0.992188	1.20823	1.2648	1.44635	1.68718	1.99982	2.58969	6.98506	35.9197
0.0897961	0.248047	0.281042	0.431826	0.496094	0.601302	0.744141	0.860994	0.992188	1.20926	1.2648	1.44635	1.69351	1.99982	2.59085	7.01583	35.9386
0.0900806	0.248047	0.281255	0.433093	0.496094	0.601403	0.744141	0.861064	0.992188	1.20973	1.2648	1.44635	1.69454	1.99982	2.59871	7.01583	35.9936
0.09009	0.248047	0.281386	0.433283	0.496094	0.601644	0.744141	0.861658	0.992303	1.21105	1.2648	1.44635	1.696	1.99982	2.60288	7.03052	36.0283
0.0901664	0.248047	0.281677	0.433415	0.496094	0.601868	0.744141	0.862797	0.992433	1.21377	1.2648	1.44635	1.6992	1.99982	2.62248	7.05082	36.2182
0.0902608	0.248047	0.28179	0.433583	0.496094	0.602342	0.744141	0.863021	0.994132	1.21457	1.2648	1.44635	1.69934	1.99982	2.63677	7.10298	36.3911
0.0904287	0.248047	0.281851	0.434133	0.496094	0.603718	0.744141	0.864474	0.996162	1.21574	1.2648	1.44635	1.70048	1.99982	2.63677	7.19336	36.8331
0.0907101	0.248047	0.281922	0.434885	0.496094	0.606358	0.744141	0.864475	0.997535	1.2158	1.2648	1.44635	1.70409	1.99982	2.63677	7.19336	36.8398
0.0907415	0.248047	0.282153	0.435714	0.496094	0.6086	0.744141	0.864681	0.997624	1.22264	1.2648	1.44635	1.70612	1.99982	2.63677	7.19336	36.9415
0.0907415	0.248047	0.282155	0.436564	0.496094	0.608609	0.744141	0.865713	0.998149	1.22368	1.2648	1.44635	1.71143	1.99982	2.63677	7.19336	36.9415
0.0909972	0.248047	0.282442	0.436685	0.496094	0.609665	0.744141	0.865898	0.999585	1.22381	1.2648	1.44635	1.71568	1.99982	2.64959	7.21057	36.9681
0.0910137	0.248047	0.282504	0.436795	0.496094	0.609766	0.744141	0.86703	1.00086	1.22728	1.2648	1.44635	1.71765	1.99982	2.66328	7.29528	36.9997
0.0910998	0.248047	0.282886	0.437767	0.496094	0.610671	0.744141	0.867266	1.00163	1.22763	1.2648	1.44635	1.72684	1.99982	2.6656	7.29528	37.2203
0.091277	0.248047	0.282992	0.437921	0.496094	0.610774	0.744141	0.867903	1.00495	1.22767	1.2648	1.44635	1.7353	1.99982	2.67155	7.32894	37.283
0.0912866	0.248047	0.28305	0.438045	0.496094	0.612111	0.744141	0.87155	1.00593	1.22986	1.2648	1.44635	1.73633	1.99982	2.67155	7.35663	37.3696
0.0914749	0.248047	0.28322	0.438054	0.496094	0.612219	0.744141	0.873541	1.00739	1.23218	1.2648	1.44635	1.73633	1.99982	2.67155	7.36244	37.4846
0.0915723	0.248047	0.283925	0.43806	0.496094	0.613344	0.744141	0.874274	1.00773	1.23223	1.2648	1.44635	1.73633	1.99982	2.67155	7.37496	37.5215
0.0916051	0.248047	0.284233	0.43814	0.496094	0.613471	0.744141	0.874429	1.00954	1.23276	1.2648	1.44635	1.73633	1.99982	2.67155	7.37496	37.6051
0.0917385	0.248047	0.284362	0.438701	0.496094	0.614024	0.744141	0.875428	1.00982	1.23374	1.2648	1.44635	1.73633	1.99982	2.67155	7.39995	37.6149
0.0918452	0.248047	0.284636	0.43915	0.496094	0.614306	0.744141	0.876917	1.00982	1.23439	1.2648	1.44635	1.73633	2.00006	2.67155	7.43313	37.659
0.0918792	0.248047	0.284711	0.439477	0.496094	0.615405	0.744141	0.877826	1.01171	1.2356	1.2648	1.44635	1.73633	2.00082	2.67155	7.45792	37.7105
0.0921777	0.248047	0.28558	0.44088	0.496094	0.615415	0.744141	0.878748	1.01186	1.23722	1.2648	1.44635	1.73633	2.00251	2.67155	7.53181	37.8107
0.0922909	0.248047	0.285602	0.44123	0.496094	0.61705	0.744141	0.879121	1.01202	1.23774	1.2648	1.44635	1.73633	2.00377	2.67155	7.54405	37.8408
0.0924866	0.248047	0.285931	0.441298	0.496094	0.619113	0.744141	0.880661	1.01207	1.23794	1.2648	1.44635	1.73633	2.00538	2.67155	7.56035	37.9763
0.0929277	0.248047	0.286092	0.441653	0.496094	0.619419	0.744141	0.881034	1.01389	1.24023	1.2648	1.44635	1.73633	2.00565	2.67155	7.57254	38.0613
0.0929355	0.248047	0.286638	0.4421	0.496094	0.620193	0.744141	0.882488	1.01436	1.24023	1.2648	1.44635	1.73633	2.00854	2.67155	7.64129	38.1331
0.0929598	0.248047	0.28709	0.442278	0.496094	0.621909	0.744141	0.883079	1.01568	1.24023	1.2648	1.44635	1.73633	2.01108	2.67155	7.70544	38.2354
0.0930015	0.248047	0.287833	0.442571	0.496094	0.621923	0.744141	0.884285	1.01665	1.24023	1.2648	1.44635	1.73633	2.01338	2.67155	7.77201	38.38
0.093391	0.248047	0.287905	0.442948	0.496094	0.622215	0.744141	0.885276	1.01715	1.24023	1.2648	1.44635	1.73633	2.02329	2.67155	7.83216	38.4569
[truncated: 8,890 more rows]
