# Supplementary material for: Long-term intravital imaging of the multicolor-coded tumor microenvironment during combination immunotherapy
Source: eLife. 2016 Nov 18;5:e14756. doi: 10.7554/eLife.14756 (PMC5173323; doi:10.7554/eLife.14756)
Supplement: Figure 6—source data 3. — DOI: http://dx.doi.org/10.7554/eLife.14756.047 [file elife-14756-fig6-data3.xls]

## Sheet: displacement（um）
0	0	0	0	0	0	0	0	0	0	0	0	0	0	0	0	0	0	0	0.248047	0.11853	0	0	0	0	0.248047	0.248047	0	0.440702	0.737002
0	0	0	0	0	0	0	0	0	0	0	0	0	0	0	0	0	0.101953	0	0.269118	0.248047	0.0542924	0	0.248047	0.248047	0.248047	0.248047	0.55465	0.496094	1.07753
0	0	0	0	0	0	0	0	0	0	0	0	0	0	0	0	0	0.101953	0	0.307795	0.321345	0.248047	0.0942686	0.317692	0.350791	0.333468	0.452036	0.655897	1.24023	1.24023
0	0	0	0	0	0	0	0	0	0	0	0	0	0	0	0	0.0839844	0.101953	0.101953	0.324456	0.350791	0.248047	0.248047	0.350791	0.477263	0.350791	0.55465	0.758634	1.24858	1.24023
0	0	0	0	0	0	0	0	0	0	0	0	0	0	0	0	0.0919115	0.101953	0.101953	0.350791	0.496094	0.248047	0.248047	0.350791	0.496094	0.55465	0.571929	1.05227	1.2648	1.36558
0	0	0	0	0	0	0	0	0	0	0	0	0	0	0	0	0.101953	0.101953	0.118772	0.419922	0.496094	0.350791	0.350791	0.350791	0.55465	0.680344	0.751561	1.1614	1.31769	1.75396
0	0	0	0	0	0	0	0	0	0	0	0	0	0	0	0	0.101953	0.101953	0.144183	0.419922	0.496094	0.350791	0.350791	0.496094	0.55465	0.784393	0.894346	1.24023	1.32799	1.75396
0	0	0	0	0	0	0	0	0	0	0	0	0	0	0	0	0.101953	0.101953	0.187795	0.496094	0.496094	0.350791	0.350791	0.496094	0.586323	0.880846	0.962773	1.24023	1.33577	1.75396
0	0	0	0	0	0	0	0	0	0	0	0	0	0	0	0	0.119628	0.101953	0.203906	0.496094	0.55465	0.350791	0.350791	0.496094	0.795736	0.933887	1.06102	1.2648	1.43081	1.79893
0	0	0	0	0	0	0	0	0	0	0	0	0	0	0	0	0.124023	0.118772	0.203906	0.496094	0.55465	0.350791	0.496094	0.496094	0.832592	0.944563	1.06524	1.26541	1.49362	1.89488
0	0	0	0	0	0	0	0	0	0	0	0	0	0	0	0	0.124023	0.175396	0.227974	0.496094	0.55465	0.350791	0.55465	0.496094	0.866847	0.949247	1.09084	1.30189	1.52497	1.97952
0	0	0	0	0	0	0	0	0	0	0	0	0	0	0.0690805	0.0839844	0.143173	0.187795	0.227974	0.496094	0.55465	0.496094	0.55465	0.500764	0.873723	1.02411	1.10496	1.33577	1.53164	2.29961
0	0	0	0	0	0	0	0	0	0	0	0	0	0	0.0839844	0.0974989	0.163587	0.203906	0.236458	0.509766	0.55465	0.496094	0.55465	0.67293	0.894346	1.02418	1.12902	1.34408	1.58529	2.31291
0	0	0	0	0	0	0	0	0	0	0	0	0	0	0.101953	0.101953	0.167969	0.203906	0.265582	0.509766	0.603017	0.496094	0.557814	0.78341	0.920063	1.03574	1.23017	1.37406	1.58698	2.49378
0	0	0	0	0	0	0	0	0	0	0	0	0	0.0839844	0.101953	0.101953	0.167969	0.203906	0.305859	0.509766	0.633946	0.496094	0.573046	0.805964	0.949973	1.05794	1.23412	1.3883	1.58827	2.54852
0	0	0	0	0	0	0	0	0	0	0	0	0	0.0839844	0.101953	0.101953	0.175396	0.203906	0.348467	0.533592	0.634211	0.55465	0.701583	0.839961	0.992188	1.08454	1.24023	1.51288	1.58827	2.64088
0	0	0	0	0	0	0	0	0	0	0	0	0	0.0998081	0.101953	0.101953	0.185568	0.248047	0.350791	0.55465	0.636441	0.55465	0.744141	0.894346	1.02259	1.08774	1.2648	1.52693	1.6249	2.75302
0	0	0	0	0	0	0	0	0	0	0	0	0	0.101953	0.118772	0.101953	0.187795	0.265582	0.350791	0.55465	0.668145	0.55465	0.744141	0.894346	1.02272	1.10162	1.27487	1.56458	1.63417	2.77325
0	0	0	0	0	0	0	0	0	0	0	0	0	0.101953	0.124023	0.101953	0.187795	0.277325	0.367597	0.55465	0.672248	0.55465	0.744141	0.894346	1.02272	1.14424	1.28335	1.58827	1.75396	2.77325
0	0	0	0	0	0	0	0	0	0	0	0	0.0218512	0.101953	0.124023	0.101953	0.203906	0.288367	0.367597	0.55465	0.678772	0.609293	0.744141	0.94019	1.06136	1.14658	1.32111	1.6181	1.76152	2.77325
0	0	0	0	0	0	0	0	0	0	0	0	0.101953	0.124023	0.124023	0.101953	0.203906	0.305859	0.37207	0.55465	0.683432	0.680691	0.752323	0.951994	1.07513	1.15485	1.33577	1.62116	1.81931	2.77325
0	0	0	0	0	0	0	0	0	0	0	0	0.101953	0.124023	0.124023	0.124023	0.203906	0.305859	0.37559	0.565585	0.689917	0.701583	0.784393	0.979604	1.08412	1.20307	1.38105	1.63112	1.86894	2.77325
0	0	0	0	0	0	0	0	0	0	0	0	0.101953	0.124023	0.124023	0.124023	0.203906	0.305859	0.419922	0.593859	0.698806	0.701583	0.855447	0.992188	1.10435	1.20565	1.4551	1.64444	1.88516	2.77325
0	0	0	0	0	0	0	0	0	0	0	0	0.118772	0.124023	0.129442	0.124023	0.203906	0.305859	0.428238	0.609479	0.701583	0.705484	0.870285	1.00236	1.12227	1.24023	1.45768	1.66579	1.88907	2.89384
0	0	0	0	0	0	0	0	0	0	0	0.0839844	0.118772	0.124023	0.138089	0.124023	0.203906	0.305859	0.438398	0.657832	0.701583	0.712715	0.871079	1.0034	1.18139	1.2553	1.48861	1.67953	1.99982	2.93003
0	0	0	0	0	0	0	0	0	0	0	0.0839844	0.124023	0.124023	0.140839	0.130313	0.227974	0.346276	0.456247	0.667416	0.701583	0.713914	0.874473	1.00652	1.19481	1.2648	1.49337	1.69093	2.01481	3.03317
0	0	0	0	0	0	0	0	0	0	0.0622876	0.0839844	0.124023	0.124023	0.144183	0.144183	0.227974	0.350791	0.475087	0.673983	0.701583	0.714262	0.898883	1.01129	1.20467	1.2648	1.50411	1.70084	2.03139	3.22618
0	0	0	0	0	0	0	0	0	0	0.0723398	0.0839844	0.124023	0.124023	0.144183	0.146121	0.248047	0.350791	0.479311	0.676154	0.701583	0.715127	0.907063	1.06434	1.21963	1.26969	1.53211	1.75396	2.06979	3.3609
0	0	0	0	0	0	0	0	0	0	0.0797927	0.0839844	0.124023	0.124023	0.163031	0.167969	0.248047	0.350791	0.496094	0.680657	0.71635	0.724542	0.911934	1.07978	1.24023	1.31251	1.53369	1.75396	2.10235	3.50791
0	0	0	0	0	0	0	0	0	0	0.0839844	0.0873683	0.124023	0.124023	0.167969	0.175396	0.248047	0.350791	0.496094	0.701583	0.744141	0.762877	0.914014	1.09568	1.24023	1.31464	1.55446	1.75396	2.11931	3.50791
0	0	0	0	0	0	0	0	0	0	0.0839844	0.0950444	0.124023	0.124023	0.175396	0.175396	0.248047	0.350791	0.498943	0.701583	0.744141	0.76588	0.918206	1.1093	1.24023	1.33577	1.5605	1.75396	2.1272	3.5301
0	0	0	0	0	0	0	0	0	0	0.0839844	0.101953	0.124023	0.124023	0.175396	0.175396	0.248047	0.350791	0.509766	0.710425	0.744141	0.777329	0.93411	1.19257	1.24023	1.33577	1.5623	1.76103	2.13378	3.54384
0	0	0	0	0	0	0	0	0	0	0.0953167	0.101953	0.13852	0.124023	0.175396	0.187795	0.248047	0.356316	0.509766	0.720917	0.744141	0.784393	0.943622	1.23163	1.24023	1.33577	1.56879	1.77168	2.13378	3.7207
0	0	0	0	0	0	0	0	0	0	0.101953	0.101953	0.14211	0.124023	0.175396	0.187795	0.248047	0.378033	0.519861	0.732594	0.784393	0.784393	0.944388	1.24664	1.2419	1.34734	1.58671	1.77231	2.17719	3.7207
0	0	0	0	0	0	0	0	0	0	0.101953	0.101953	0.144183	0.144183	0.175396	0.187795	0.248047	0.387379	0.526187	0.732617	0.784393	0.784393	0.956959	1.24874	1.2632	1.37211	1.58827	1.79514	2.18013	3.7207
0	0	0	0	0	0	0	0	0	0	0.101953	0.101953	0.144183	0.144183	0.187795	0.187795	0.251953	0.392197	0.531164	0.734347	0.784393	0.784393	0.992188	1.25567	1.28015	1.37578	1.58827	1.81463	2.24454	3.7207
0	0	0	0	0	0	0	0	0	0	0.101953	0.101953	0.144183	0.167969	0.187795	0.187795	0.265582	0.407813	0.540597	0.736242	0.784393	0.784393	0.992188	1.2648	1.29488	1.42455	1.59264	1.84014	2.25938	3.7207
0	0	0	0	0	0	0	0	0	0	0.101953	0.101953	0.175396	0.167969	0.195465	0.203906	0.277325	0.420364	0.550308	0.738827	0.784393	0.795554	0.992188	1.26567	1.30145	1.44635	1.60387	1.86591	2.34007	3.91056
0	0	0	0	0	0	0	0	0	0	0.101953	0.101953	0.175396	0.175396	0.203906	0.203906	0.277325	0.420364	0.55465	0.741213	0.790563	0.843193	0.99274	1.26966	1.307	1.45926	1.61712	1.88907	2.34007	3.92197
0	0	0	0	0	0	0	0	0	0.0390601	0.118772	0.118772	0.175396	0.175396	0.203906	0.203906	0.280987	0.422213	0.55465	0.741307	0.799781	0.853354	1.01093	1.28611	1.31891	1.47462	1.63907	1.93731	2.34007	3.92197
0	0	0	0	0	0	0	0	0	0.041865	0.118772	0.118772	0.175396	0.175396	0.203906	0.203906	0.288367	0.428238	0.55465	0.744141	0.840918	0.864863	1.01771	1.29169	1.33577	1.48933	1.6579	1.94827	2.34357	3.92197
0	0	0	0	0	0	0	0	0	0.0802645	0.118772	0.124023	0.175396	0.187075	0.203906	0.21128	0.288367	0.435372	0.55465	0.744141	0.845175	0.874907	1.02053	1.30357	1.34095	1.49396	1.6711	1.95138	2.36487	3.92197
0	0	0	0	0	0	0	0	0	0.0822321	0.118772	0.124023	0.177562	0.187795	0.203906	0.211356	0.288367	0.442897	0.560027	0.744141	0.846011	0.887767	1.02272	1.30585	1.34336	1.49453	1.72373	1.95583	2.37092	4.06755
0	0	0	0	0	0	0	0	0	0.083401	0.118772	0.124023	0.177777	0.187795	0.203906	0.227974	0.30281	0.447173	0.563384	0.744365	0.859513	0.888897	1.02272	1.3141	1.35001	1.49488	1.72583	1.95953	2.40717	4.08547
0	0	0	0	0	0	0	0	0	0.0839844	0.124023	0.124023	0.187795	0.187795	0.203906	0.227974	0.30281	0.447173	0.563384	0.745495	0.872765	0.894346	1.07013	1.31999	1.38177	1.53087	1.73492	1.96593	2.42133	4.13588
0	0	0	0	0	0	0	0	0	0.0839844	0.124023	0.124023	0.187795	0.19809	0.203906	0.227974	0.305859	0.447173	0.577166	0.74683	0.876982	0.894346	1.08784	1.32101	1.39746	1.5363	1.73501	1.98169	2.45554	4.13834
0	0	0	0	0	0	0	0	0	0.101953	0.124023	0.124023	0.187795	0.203906	0.203906	0.227974	0.305859	0.45227	0.587891	0.766738	0.890099	0.923239	1.08917	1.33577	1.39762	1.54881	1.75396	2.03836	2.45554	4.30526
0	0	0	0	0	0	0	0	0	0.101953	0.124023	0.124023	0.187795	0.203906	0.21865	0.227974	0.305859	0.45227	0.593859	0.769794	0.894346	0.928251	1.09448	1.33577	1.40489	1.56674	1.75396	2.05408	2.45711	4.33642
0	0	0	0	0	0	0	0	0	0.101953	0.124023	0.124023	0.187795	0.203906	0.223947	0.23203	0.305859	0.45227	0.594484	0.773949	0.894346	0.970167	1.1093	1.33577	1.40872	1.56701	1.75396	2.05537	2.4572	4.44751
0	0	0	0	0	0	0	0	0.0379222	0.101953	0.124023	0.124023	0.187795	0.203906	0.227974	0.237544	0.313657	0.455948	0.612283	0.783559	0.894346	0.985724	1.11175	1.34919	1.40885	1.58827	1.75396	2.05547	2.52459	4.47173
0	0	0	0	0	0	0	0	0.0830702	0.101953	0.124023	0.124023	0.187795	0.203906	0.227974	0.248047	0.322404	0.478029	0.620173	0.784393	0.894346	0.992188	1.14091	1.35199	1.41514	1.58827	1.75396	2.07396	2.5538	4.47173
0	0	0	0	0	0	0	0	0.0839844	0.109371	0.124023	0.124023	0.187795	0.203906	0.227974	0.248047	0.322404	0.479567	0.625412	0.784393	0.894346	0.992188	1.14577	1.35959	1.43142	1.59109	1.75396	2.13378	2.5538	4.47173
0	0	0	0	0	0	0	0	0.0839844	0.112056	0.124023	0.124023	0.187795	0.204181	0.227974	0.248047	0.322404	0.483802	0.627006	0.784393	0.894346	0.992188	1.1883	1.36099	1.45534	1.59147	1.75396	2.21612	2.58058	4.69896
0	0	0	0	0	0	0	0	0.0839844	0.118772	0.124023	0.124023	0.203049	0.210655	0.237544	0.248047	0.322404	0.489709	0.643497	0.784393	0.918554	0.99332	1.19609	1.36693	1.46537	1.6121	1.795	2.2186	2.58535	4.96023
0	0	0	0	0	0	0	0	0.0839844	0.124023	0.124023	0.124023	0.203906	0.227974	0.237544	0.248047	0.335938	0.489709	0.648565	0.784393	0.920377	1.01581	1.21036	1.36917	1.47559	1.61733	1.79501	2.2186	2.58969	4.96094
0	0	0	0	0	0	0	0	0.0839844	0.124023	0.124023	0.127139	0.203906	0.227974	0.237544	0.248047	0.336714	0.496094	0.650185	0.784393	0.927318	1.0221	1.23937	1.38141	1.50644	1.63876	1.83219	2.2304	2.635	4.96094
0	0	0	0	0	0	0	0	0.0839844	0.124023	0.124023	0.144183	0.203906	0.227974	0.237544	0.248047	0.346276	0.496463	0.652819	0.784393	0.932683	1.02272	1.24023	1.39199	1.50881	1.66529	1.83911	2.23058	2.64808	4.96094
0	0	0	0	0	0	0	0	0.0839844	0.124023	0.124023	0.144183	0.203906	0.237544	0.237544	0.248047	0.346466	0.50153	0.655939	0.784393	0.936195	1.04377	1.24023	1.3939	1.50881	1.66806	1.84811	2.24558	2.67155	4.96094
0	0	0	0	0	0	0	0	0.0839844	0.124023	0.124023	0.144183	0.203906	0.237544	0.247006	0.248047	0.346766	0.503906	0.655939	0.78749	0.953147	1.04664	1.24023	1.39446	1.50944	1.6711	1.85427	2.27541	2.67155	4.96094
0	0	0	0	0	0	0	0	0.0839844	0.124023	0.124023	0.168176	0.213299	0.238508	0.248047	0.251953	0.350687	0.509766	0.656064	0.796656	0.976357	1.04821	1.24023	1.39472	1.51468	1.67358	1.85888	2.28688	2.67155	4.96094
0	0	0	0	0	0	0	0	0.0839844	0.124023	0.124023	0.170944	0.214814	0.238652	0.248047	0.251953	0.350791	0.509766	0.666107	0.820148	0.983445	1.04826	1.24023	1.40317	1.51763	1.67468	1.86235	2.30517	2.67943	4.96094
0	0	0	0	0	0	0	0	0.0839844	0.124023	0.125234	0.175396	0.227974	0.248047	0.248047	0.251953	0.350791	0.510857	0.667887	0.825646	0.987485	1.05237	1.24531	1.4033	1.52721	1.67604	1.87856	2.3202	2.68542	5.02158
0	0	0	0	0	0	0	0	0.0897684	0.124023	0.129646	0.175396	0.227974	0.248047	0.248047	0.261541	0.350791	0.518392	0.667887	0.834262	0.992188	1.05796	1.26214	1.40577	1.53586	1.69295	1.90815	2.33946	2.7354	5.11362
0	0	0	0	0	0	0	0.0201564	0.101105	0.124023	0.135222	0.175396	0.227974	0.248047	0.248047	0.263459	0.350791	0.519861	0.667887	0.839844	0.992188	1.08955	1.26938	1.41192	1.55235	1.69379	1.91223	2.34007	2.75933	5.11362
0	0	0	0	0	0	0	0.0432123	0.101953	0.124023	0.143941	0.175396	0.227974	0.248047	0.248047	0.265582	0.350791	0.526187	0.674008	0.839844	0.992188	1.1093	1.27198	1.41515	1.58821	1.69522	1.95006	2.34007	2.76373	5.11362
0	0	0	0	0	0	0	0.0536775	0.101953	0.124023	0.144183	0.175396	0.227974	0.248047	0.248047	0.270878	0.350791	0.526187	0.695458	0.844416	0.99508	1.12876	1.27853	1.41519	1.58827	1.70686	1.98438	2.34007	2.76778	5.11362
0	0	0	0	0	0	0	0.0738469	0.101953	0.131855	0.144183	0.175396	0.236316	0.248047	0.248047	0.277325	0.350791	0.534445	0.698319	0.848645	0.998254	1.12956	1.2878	1.42302	1.58827	1.71374	1.98438	2.34007	2.77325	5.11362
0	0	0	0	0	0	0	0.0795918	0.101953	0.134982	0.144183	0.186182	0.237544	0.248047	0.248047	0.289473	0.364552	0.537702	0.701583	0.871203	1.00595	1.14256	1.28943	1.43456	1.59312	1.73633	1.99488	2.34418	2.77325	5.11362
0	0	0	0	0	0	0	0.0796467	0.101953	0.144183	0.144183	0.187795	0.244575	0.248047	0.251953	0.292382	0.367597	0.537762	0.701583	0.892449	1.00743	1.14284	1.29201	1.43497	1.59615	1.73633	2.01006	2.34706	2.77934	5.26187
0	0	0	0	0	0	0	0.0839844	0.101953	0.144183	0.145141	0.202529	0.248047	0.248047	0.251953	0.30145	0.367597	0.537762	0.701583	0.894346	1.00903	1.14523	1.2926	1.4356	1.59921	1.74559	2.04545	2.35318	2.85709	5.35274
0	0	0	0	0	0	0	0.0839844	0.102587	0.144183	0.146948	0.203906	0.248047	0.248047	0.255923	0.30281	0.367597	0.540818	0.709167	0.894346	1.02272	1.14755	1.30542	1.43624	1.64981	1.75148	2.04545	2.36515	2.86606	5.5465
0	0	0	0	0	0	0	0.0839844	0.118772	0.144183	0.167969	0.203906	0.248047	0.248047	0.265582	0.303487	0.37207	0.546641	0.717563	0.894346	1.02272	1.18868	1.30937	1.43795	1.66162	1.75396	2.07058	2.38252	2.87773	5.5465
0	0	0	0	0	0	0	0.0839844	0.118772	0.144183	0.167969	0.213689	0.248047	0.248047	0.265582	0.305859	0.37207	0.549034	0.719362	0.894346	1.02272	1.19617	1.31845	1.44635	1.66408	1.75396	2.07853	2.38407	2.8927	5.5465
0	0	0	0	0	0	0	0.0839844	0.121171	0.144183	0.167969	0.214107	0.248047	0.248047	0.277325	0.305859	0.401589	0.549034	0.721327	0.894346	1.02304	1.20563	1.31982	1.44635	1.66505	1.75396	2.09742	2.4212	2.89967	5.5465
0	0	0	0	0	0	0	0.0839844	0.124023	0.153151	0.167969	0.227974	0.248047	0.248047	0.277325	0.305859	0.407812	0.55465	0.723175	0.894346	1.03731	1.2099	1.32247	1.45058	1.66694	1.75396	2.10489	2.43377	2.92707	5.82871
0	0	0	0	0	0	0	0.0839844	0.124023	0.163587	0.170493	0.227974	0.248047	0.248047	0.277325	0.30941	0.419922	0.55465	0.723175	0.894346	1.04276	1.2151	1.32463	1.46711	1.66707	1.75396	2.11197	2.44298	2.93504	6.04016
0	0	0	0	0	0	0	0.0856611	0.124023	0.164627	0.175396	0.227974	0.248047	0.248047	0.277325	0.322404	0.419922	0.55465	0.723175	0.894346	1.05237	1.2182	1.32599	1.48383	1.66731	1.75396	2.13378	2.46512	2.94708	6.32398
0	0	0	0	0	0	0	0.0918179	0.124023	0.167969	0.175396	0.227974	0.248047	0.248047	0.277325	0.322404	0.420364	0.55465	0.72622	0.905161	1.05237	1.23178	1.33011	1.48828	1.6711	1.75396	2.13378	2.46582	2.96435	6.32398
0	0	0	0	0	0	0	0.0919703	0.124023	0.167969	0.175396	0.227974	0.248047	0.251953	0.277325	0.322404	0.420364	0.55465	0.731293	0.907137	1.05237	1.23354	1.33577	1.50002	1.67663	1.75396	2.13378	2.48047	2.96774	6.49499
0	0	0	0	0	0	0	0.100087	0.124023	0.172379	0.175396	0.228629	0.248047	0.251953	0.281303	0.322404	0.4239	0.55465	0.744141	0.909752	1.06158	1.24023	1.33577	1.50881	1.68615	1.75396	2.13378	2.48047	2.97656	6.67887
0	0	0	0	0	0	0	0.101953	0.124023	0.174238	0.175396	0.237544	0.248047	0.251953	0.282049	0.324378	0.43255	0.55465	0.744141	0.914455	1.06726	1.24023	1.33577	1.51874	1.71655	1.75396	2.13378	2.48047	2.98688	6.67887
0	0	0	0	0	0	0	0.101953	0.124023	0.175396	0.186631	0.237544	0.248047	0.251953	0.288263	0.330986	0.447173	0.55465	0.744141	0.916545	1.0806	1.24023	1.33577	1.51942	1.73946	1.75396	2.13378	2.48665	2.99716	7.54405
0	0	0	0	0	0	0	0.101953	0.124023	0.175396	0.187795	0.237544	0.248047	0.256347	0.289838	0.335938	0.447173	0.562503	0.744141	0.91888	1.08551	1.24023	1.33577	1.53388	1.73954	1.75396	2.16649	2.49284	3.01312	7.84393
0	0	0	0	0	0	0.00506222	0.101953	0.124023	0.175396	0.187795	0.237544	0.248047	0.261723	0.29629	0.343822	0.447173	0.564842	0.744141	0.921175	1.08573	1.24023	1.33577	1.5342	1.75396	1.75396	2.18129	2.49284	3.01379	7.94137
0	0	0	0	0	0	0.0243895	0.101953	0.124023	0.175396	0.187795	0.237544	0.248047	0.264522	0.30281	0.346276	0.455948	0.56664	0.755859	0.933371	1.0866	1.24023	1.33577	1.53868	1.75396	1.79658	2.19064	2.49959	3.01943	8.31975
0	0	0	0	0	0	0.0479544	0.101953	0.124023	0.175396	0.187795	0.238197	0.248047	0.265582	0.30281	0.346979	0.468112	0.572681	0.755859	0.93429	1.08752	1.24713	1.3364	1.53926	1.75396	1.80719	2.19679	2.50549	3.01953	8.76978
0	0	0	0	0	0	0.0518317	0.101953	0.124023	0.175396	0.187795	0.248047	0.248047	0.265582	0.305141	0.350791	0.470458	0.578226	0.773998	0.967746	1.10237	1.257	1.34261	1.54471	1.75396	1.8092	2.199	2.52959	3.04097	8.94346
0	0	0	0	0	0	0.0621169	0.101953	0.124023	0.182707	0.187795	0.248047	0.248047	0.265582	0.305859	0.350791	0.475087	0.587683	0.776745	0.973911	1.1093	1.2646	1.35977	1.5467	1.75396	1.83194	2.2186	2.52959	3.07435	9.02904
0	0	0	0	0	0	0.0749167	0.101953	0.124023	0.187795	0.187795	0.248047	0.248047	0.265582	0.305859	0.350791	0.481513	0.587891	0.781546	0.983012	1.1093	1.2648	1.36256	1.55727	1.75396	1.84285	2.2186	2.53933	3.094	9.02904
0	0	0	0	0	0	0.0774481	0.101953	0.124023	0.187795	0.190606	0.248047	0.248047	0.265582	0.305859	0.350791	0.491219	0.587891	0.784393	0.985519	1.1093	1.2648	1.3626	1.558	1.75396	1.85441	2.22765	2.57346	3.09527	9.44534
0	0	0	0	0	0	0.0821131	0.101953	0.124023	0.187795	0.203906	0.248047	0.248047	0.277325	0.305859	0.350791	0.492903	0.587891	0.784393	0.992188	1.1093	1.2648	1.37733	1.56879	1.75396	1.86938	2.23977	2.58519	3.11371	9.68654
0	0	0	0	0	0	0.0839844	0.101953	0.124023	0.187795	0.203906	0.248047	0.248047	0.277325	0.305859	0.350791	0.496094	0.594484	0.784393	0.994835	1.1093	1.26676	1.39328	1.58827	1.75396	1.88907	2.2483	2.59366	3.11652	10.5966
0	0	0	0	0	0	0.0839844	0.101953	0.124023	0.187795	0.203906	0.248047	0.248047	0.277325	0.305859	0.350791	0.496094	0.594484	0.784393	1.01953	1.12318	1.26706	1.3933	1.58827	1.75396	1.88907	2.25081	2.59401	3.13757	10.6689
0	0	0	0	0	0	0.0839844	0.108188	0.124023	0.191207	0.203906	0.248047	0.248047	0.277325	0.319991	0.350791	0.496094	0.596456	0.784393	1.01953	1.12421	1.27538	1.39951	1.60488	1.75396	1.90028	2.25312	2.61716	3.14673	11.093
0	0	0	0	0	0	0.0839844	0.116548	0.124023	0.20262	0.203906	0.248047	0.261568	0.277325	0.322404	0.350791	0.496094	0.60562	0.784393	1.02144	1.14344	1.27844	1.40707	1.6072	1.75396	1.90111	2.26344	2.63242	3.15699	11.1621
0	0	0	0	0	0	0.0839844	0.116829	0.124023	0.202626	0.211594	0.248047	0.261679	0.288367	0.322404	0.350791	0.503692	0.619288	0.785454	1.02272	1.1545	1.2873	1.41367	1.60825	1.75396	1.90815	2.26782	2.63465	3.17655	11.2308
0	0	0	0	0	0	0.0839844	0.117648	0.124023	0.203906	0.215181	0.248047	0.265582	0.288367	0.322404	0.351305	0.503906	0.623345	0.796279	1.02272	1.15861	1.29012	1.42184	1.63302	1.75396	1.93424	2.27229	2.63677	3.17655	12.4642
0	0	0	0	0	0	0.0892249	0.118015	0.124023	0.203906	0.219756	0.248047	0.265582	0.288367	0.324575	0.362665	0.505397	0.632398	0.796279	1.02272	1.16106	1.30048	1.42851	1.63341	1.75396	1.93731	2.27547	2.66762	3.20361	12.4642
0	0	0	0	0	0	0.0913659	0.118772	0.125174	0.203906	0.224416	0.248047	0.277325	0.298951	0.325487	0.362712	0.509426	0.634515	0.796746	1.03314	1.16478	1.30161	1.43628	1.64411	1.75396	1.93731	2.28688	2.67155	3.20564	12.648
0	0	0	0	0	0	0.0956796	0.118772	0.12547	0.203906	0.227974	0.248047	0.277325	0.30281	0.335937	0.367597	0.509652	0.639606	0.797376	1.04263	1.16877	1.30213	1.43707	1.65206	1.75396	1.94152	2.28688	2.67155	3.22461	12.648
0	0	0	0	0	0	0.0965646	0.118772	0.125632	0.203906	0.227974	0.248047	0.277325	0.30281	0.335938	0.37207	0.509766	0.650103	0.797831	1.05233	1.16899	1.30687	1.43884	1.65385	1.75396	1.95887	2.31432	2.67155	3.24478	13.5786
0	0	0	0	0	0	0.101953	0.118772	0.129477	0.203906	0.227974	0.248047	0.277325	0.30281	0.346276	0.37207	0.509766	0.652819	0.804137	1.05237	1.178	1.31593	1.44635	1.65684	1.75396	1.96254	2.31445	2.67155	3.25093	13.8662
0	0	0	0	0	0	0.101953	0.118772	0.139883	0.203906	0.230571	0.248047	0.277325	0.30281	0.346276	0.37559	0.509766	0.655939	0.810004	1.05237	1.18565	1.31639	1.44635	1.6625	1.75396	1.96999	2.32049	2.67155	3.26255	14.4635
0	0	0	0	0	0	0.101953	0.119047	0.144183	0.205434	0.237544	0.248047	0.277325	0.30281	0.346276	0.383078	0.509766	0.655939	0.811023	1.05237	1.19074	1.31721	1.44635	1.66395	1.76047	1.97078	2.32547	2.67155	3.2796	14.5166
0	0	0	0	0	0	0.101953	0.124023	0.144183	0.211536	0.242413	0.248047	0.277325	0.30281	0.350791	0.392197	0.510857	0.655939	0.817047	1.05237	1.19709	1.31942	1.44635	1.66395	1.76492	1.98321	2.33237	2.68605	3.29194	17.3633
0	0	0	0	0	0	0.101953	0.124023	0.144676	0.217387	0.245888	0.248047	0.277325	0.30281	0.350791	0.392197	0.510857	0.657341	0.821131	1.05237	1.2051	1.32158	1.44635	1.67011	1.77069	1.99982	2.33963	2.68963	3.30936	19.2536
0	0	0	0	0	0	0.101953	0.124023	0.161239	0.218098	0.246118	0.248047	0.277325	0.305859	0.350791	0.407812	0.510857	0.6587	0.821972	1.05237	1.21152	1.32527	1.44889	1.67519	1.7727	1.99982	2.34007	2.70781	3.30936	19.2935
0	0	0	0	0	0	0.101953	0.124023	0.162154	0.219438	0.248047	0.248047	0.277325	0.305859	0.350791	0.407813	0.511362	0.664724	0.831728	1.05237	1.21406	1.3309	1.4538	1.67607	1.7756	2.02466	2.34007	2.71354	3.31605	19.3731
0	0	0	0	0	0	0.101953	0.124023	0.163889	0.227974	0.248047	0.248047	0.277325	0.305859	0.350791	0.410541	0.511362	0.667599	0.831765	1.05237	1.21598	1.33496	1.45613	1.69276	1.78529	2.0384	2.34007	2.72852	3.33713	19.6098
0	0	0	0	0	0	0.101953	0.124023	0.167969	0.227974	0.248047	0.248047	0.277325	0.305859	0.350791	0.419922	0.512249	0.667887	0.833851	1.05946	1.22327	1.33514	1.45682	1.70477	1.78869	2.04545	2.34957	2.72852	3.33713	19.8267
0	0	0	0	0	0	0.101953	0.124023	0.167969	0.227974	0.248047	0.248047	0.277325	0.305859	0.350791	0.420364	0.526187	0.667887	0.840727	1.0842	1.22492	1.33577	1.46147	1.72429	1.79131	2.04545	2.35318	2.73977	3.33793	21.084
0	0	0	0	0	0	0.101953	0.124023	0.167969	0.229843	0.248047	0.248047	0.277325	0.305859	0.350791	0.420364	0.531164	0.667887	0.851709	1.09611	1.22927	1.33577	1.46633	1.73075	1.79672	2.04545	2.36246	2.76156	3.35044	21.084
0	0	0	0	0	0	0.101953	0.124023	0.167969	0.235055	0.248047	0.248047	0.277325	0.30668	0.350791	0.420364	0.531164	0.667887	0.852532	1.09924	1.23111	1.33577	1.46812	1.73633	1.80581	2.04545	2.37007	2.77325	3.36731	21.4098
0	0	0	0	0	0.0128996	0.101953	0.124023	0.167969	0.237544	0.248047	0.248047	0.279376	0.312714	0.350791	0.4216	0.537762	0.671371	0.865233	1.10043	1.23999	1.33577	1.46857	1.75396	1.80581	2.04545	2.37175	2.77325	3.41095	21.4098
0	0	0	0	0	0.0289292	0.101953	0.124023	0.167969	0.237544	0.248047	0.248047	0.280387	0.31721	0.350791	0.421977	0.537879	0.671875	0.872327	1.10132	1.24023	1.33577	1.47741	1.75396	1.80581	2.04762	2.37286	2.77325	3.45489	22.8688
0	0	0	0	0	0.0296175	0.101953	0.124023	0.168148	0.247721	0.248047	0.248047	0.288367	0.319959	0.350791	0.425168	0.539022	0.671875	0.878235	1.10572	1.24023	1.33577	1.48997	1.75396	1.80581	2.04843	2.38028	2.77325	3.4734	23.6946
0	0	0	0	0	0.042328	0.101953	0.124023	0.169233	0.248047	0.248047	0.248047	0.288367	0.322404	0.350791	0.427623	0.540157	0.671875	0.881211	1.1093	1.24023	1.33577	1.49192	1.75396	1.80712	2.05414	2.38674	2.77325	3.50791	24.8047
0	0	0	0	0	0.0524098	0.101953	0.124023	0.174021	0.248047	0.248047	0.248047	0.288367	0.322404	0.350791	0.428238	0.54495	0.673604	0.884941	1.1093	1.24023	1.33577	1.49425	1.75396	1.80984	2.08053	2.39305	2.77325	3.50791	24.8047
0	0	0	0	0	0.0547118	0.103646	0.124023	0.175396	0.248047	0.248047	0.248047	0.299225	0.322404	0.350791	0.430643	0.546323	0.677104	0.889398	1.1093	1.24023	1.33577	1.49751	1.75396	1.82204	2.09036	2.39802	2.77325	3.50791	27.3133
0	0	0	0	0	0.0572588	0.116225	0.124023	0.175396	0.248047	0.248047	0.248047	0.30281	0.322404	0.350791	0.43255	0.549034	0.677104	0.890445	1.1093	1.24023	1.36059	1.50881	1.75396	1.83083	2.10475	2.40696	2.77325	3.50791	27.5377
0	0	0	0	0	0.0656507	0.118192	0.124023	0.175396	0.248047	0.248047	0.248047	0.30281	0.322404	0.350791	0.43255	0.549034	0.677949	0.894346	1.1093	1.24023	1.36867	1.50881	1.75396	1.83444	2.11922	2.43373	2.77325	3.50791	27.7325
0	0	0	0	0	0.0669867	0.118772	0.124023	0.175396	0.248047	0.248047	0.248047	0.30281	0.335938	0.350791	0.447173	0.549034	0.687789	0.894346	1.1093	1.24023	1.37825	1.51001	1.75396	1.86256	2.11931	2.43477	2.77325	3.5351	28.633
0	0	0	0	0	0.0697869	0.118772	0.124023	0.175396	0.248047	0.248047	0.248047	0.30281	0.335938	0.354262	0.447173	0.549034	0.701583	0.894346	1.11362	1.24023	1.38186	1.52216	1.75396	1.86329	2.12129	2.43639	2.82817	3.53925	30.1762
0	0	0	0	0	0.0707773	0.121248	0.124023	0.175396	0.248047	0.248047	0.248047	0.302954	0.335938	0.356316	0.447173	0.549034	0.701583	0.894346	1.11532	1.24228	1.40317	1.54201	1.75396	1.86463	2.13378	2.44298	2.84124	3.5641	32.9538
0	0	0	0	0	0.0719174	0.122679	0.124023	0.175396	0.248047	0.248047	0.24898	0.303837	0.338463	0.356316	0.447173	0.549034	0.701583	0.894346	1.11878	1.24294	1.40317	1.54226	1.75396	1.86542	2.13378	2.45827	2.84685	3.58669	35.7953
0	0	0	0	0	0.076616	0.124023	0.124023	0.175396	0.248047	0.248047	0.251953	0.305859	0.346276	0.357683	0.455948	0.549034	0.706517	0.894346	1.12474	1.24414	1.40818	1.54664	1.75396	1.88696	2.15073	2.48047	2.87029	3.58708	37.3102
0	0	0	0	0	0.0782754	0.124023	0.124023	0.175396	0.248047	0.248047	0.251953	0.305859	0.346276	0.367409	0.455948	0.55465	0.707595	0.894346	1.13878	1.25303	1.42175	1.54877	1.75396	1.88907	2.1508	2.48047	2.87581	3.60224	46.6862
0	0	0	0	0	0.082419	0.124023	0.124023	0.175396	0.248047	0.248047	0.251953	0.305859	0.346276	0.367597	0.455948	0.55465	0.711028	0.894346	1.13987	1.26154	1.44149	1.56417	1.75396	1.88907	2.15494	2.48532	2.89197	3.61162	47.1452
0	0	0	0	0	0.0839844	0.124023	0.124023	0.175396	0.248047	0.248047	0.259312	0.322404	0.349863	0.367597	0.455948	0.55465	0.714442	0.894346	1.1404	1.2648	1.44294	1.56879	1.75396	1.88907	2.16022	2.49284	2.89637	3.617	55.8243
0	0	0	0	0	0.0839844	0.124023	0.124023	0.175396	0.248047	0.248047	0.263472	0.322404	0.349915	0.367597	0.455948	0.55465	0.720917	0.894346	1.15102	1.2648	1.44523	1.56879	1.75396	1.89258	2.1656	2.49284	2.90446	3.62016	56.5634
0	0	0	0	0	0.0839844	0.124023	0.124023	0.175396	0.248047	0.248047	0.265582	0.322404	0.350791	0.369612	0.455948	0.566261	0.720917	0.894346	1.15978	1.2648	1.44635	1.57066	1.75396	1.90815	2.17736	2.49284	2.92778	3.64818	58.934
0	0	0	0	0	0.0839844	0.124023	0.124023	0.175396	0.248047	0.248047	0.265582	0.322404	0.350791	0.37207	0.455948	0.567459	0.720917	0.894346	1.16046	1.2648	1.44635	1.58827	1.75396	1.91785	2.18551	2.51142	2.93822	3.66101	60.5687
0	0	0	0	0	0.0839844	0.124023	0.124023	0.175396	0.248047	0.248047	0.265582	0.325797	0.350791	0.37207	0.464256	0.571717	0.723175	0.894346	1.16529	1.2648	1.44635	1.58827	1.75396	1.92901	2.19861	2.52116	2.94277	3.68345	64.0254
0	0	0	0	0	0.0839844	0.124023	0.124023	0.175396	0.248047	0.248047	0.265582	0.332517	0.350791	0.37207	0.469414	0.57265	0.727392	0.894346	1.16825	1.2648	1.44635	1.58827	1.75396	1.92919	2.20022	2.54674	2.96371	3.68446
0	0	0	0	0	0.0839844	0.124023	0.124023	0.180313	0.248047	0.248047	0.265582	0.335522	0.350791	0.37207	0.469657	0.587891	0.739556	0.915593	1.17005	1.2648	1.44635	1.58827	1.75396	1.93223	2.20957	2.5538	2.96677	3.69598
0	0	0	0	0	0.0839844	0.124023	0.124023	0.185654	0.248047	0.248047	0.277218	0.335938	0.350791	0.37207	0.47318	0.593859	0.739611	0.921282	1.17975	1.271	1.44635	1.59591	1.75396	1.93731	2.2186	2.5538	2.97104	3.7207
0	0	0	0	0	0.0839844	0.124023	0.124023	0.186402	0.248047	0.248047	0.277325	0.337783	0.350791	0.37207	0.475087	0.594268	0.744141	0.923828	1.1838	1.28224	1.44704	1.60042	1.75396	1.93731	2.2186	2.5538	2.97153	3.72896
0	0	0	0	0	0.0839844	0.124023	0.124023	0.186644	0.248047	0.248047	0.277325	0.346276	0.350791	0.37559	0.475087	0.594484	0.744141	0.930272	1.1874	1.3309	1.44762	1.60052	1.75396	1.95605	2.21955	2.57419	2.9719	3.75363
0	0	0	0	0	0.0839844	0.124023	0.124023	0.187795	0.248047	0.248047	0.277325	0.346276	0.350791	0.37559	0.475087	0.60562	0.755064	0.937519	1.19353	1.33577	1.44894	1.61145	1.75808	1.95668	2.23043	2.57461	2.97531	3.75363
0	0	0	0	0	0.0839844	0.124023	0.124023	0.187795	0.248047	0.248047	0.277325	0.346276	0.350791	0.37559	0.48232	0.606395	0.760511	0.944534	1.19582	1.33577	1.45	1.629	1.76264	1.96643	2.23242	2.57647	2.97656	3.76367
0	0	0	0	0.00149858	0.0839844	0.124023	0.124023	0.187795	0.248047	0.248047	0.277325	0.346276	0.350791	0.37559	0.489709	0.609808	0.763553	0.945843	1.19663	1.33577	1.45269	1.65549	1.77325	1.96658	2.2351	2.58495	2.97656	3.78978
0	0	0	0	0.0226298	0.0839844	0.124023	0.124023	0.187795	0.248047	0.248047	0.277325	0.346276	0.350791	0.37559	0.489709	0.61052	0.766759	0.956639	1.20468	1.33577	1.46396	1.6625	1.77393	1.96806	2.24104	2.58969	2.9773	3.80415
0	0	0	0	0.0272632	0.084485	0.124023	0.124023	0.187795	0.248047	0.248047	0.277325	0.349589	0.350791	0.386168	0.489709	0.617979	0.770197	0.961824	1.21309	1.33577	1.46599	1.66395	1.77515	1.97078	2.24311	2.58969	2.99716	3.8472
0	0	0	0	0.0375253	0.0867435	0.124023	0.124023	0.187795	0.248047	0.248047	0.277325	0.350791	0.350791	0.392197	0.489709	0.620117	0.784393	0.967016	1.21672	1.33577	1.46788	1.66395	1.77963	1.98321	2.26347	2.58969	2.99716	3.86022
0	0	0	0	0.037988	0.0871366	0.124023	0.124023	0.187795	0.248047	0.248047	0.277325	0.350791	0.350791	0.392197	0.494049	0.620117	0.784393	0.968203	1.22758	1.33577	1.46808	1.66772	1.78054	1.98438	2.26844	2.58969	2.99868	3.8677
0	0	0	0	0.0428674	0.0872276	0.124023	0.124023	0.203906	0.248047	0.248047	0.286112	0.350791	0.366625	0.392197	0.496094	0.620117	0.784393	0.969986	1.23398	1.33577	1.47545	1.67083	1.78529	1.98572	2.26922	2.59252	3.00495	3.87462
0	0	0	0	0.0447987	0.0929956	0.124023	0.124023	0.203906	0.248047	0.248047	0.288367	0.350791	0.367597	0.392197	0.496094	0.620157	0.784393	0.979545	1.24023	1.33577	1.48558	1.67326	1.78869	1.99336	2.27907	2.6003	3.01762	3.91357
0	0	0	0	0.047931	0.0942341	0.124023	0.144183	0.203906	0.248047	0.248047	0.288367	0.350791	0.37207	0.392197	0.496094	0.620157	0.784393	0.982997	1.24023	1.33577	1.48828	1.67484	1.798	1.99982	2.27956	2.61176	3.0278	3.92186
0	0	0	0	0.0515248	0.0942585	0.124023	0.144183	0.203906	0.248047	0.248047	0.288367	0.350791	0.37207	0.392197	0.496094	0.632398	0.784393	0.983139	1.24023	1.33827	1.49528	1.6778	1.79835	1.99982	2.28688	2.61432	3.03731	3.92197
0	0	0	0	0.0544354	0.0944837	0.124023	0.144183	0.203906	0.248047	0.248047	0.288367	0.350791	0.37207	0.392197	0.496094	0.639606	0.784393	0.992188	1.24023	1.34918	1.49905	1.68686	1.80562	1.99982	2.28688	2.62702	3.03809	3.92197
0	0	0	0	0.0552862	0.0945629	0.124023	0.163587	0.203906	0.248047	0.248047	0.288367	0.350791	0.37207	0.392305	0.496094	0.639606	0.784393	0.992188	1.24023	1.35645	1.50101	1.69212	1.80581	1.99982	2.28688	2.63598	3.06817	3.92197
0	0	0	0	0.059663	0.0964717	0.124023	0.167969	0.20615	0.248047	0.251953	0.288367	0.350791	0.375404	0.395167	0.501586	0.639606	0.784393	0.999909	1.24023	1.36198	1.50231	1.70116	1.80581	1.99982	2.28897	2.63677	3.07159	3.92617
0	0	0	0	0.063374	0.0970344	0.124023	0.167969	0.206737	0.248047	0.251953	0.288393	0.350791	0.37559	0.400023	0.50185	0.639606	0.784393	1.00026	1.24023	1.36354	1.50881	1.7034	1.80581	1.99982	2.29817	2.64767	3.07435	3.92952
0	0	0	0	0.0635142	0.0982762	0.124023	0.167969	0.213819	0.248047	0.265582	0.29074	0.350791	0.379958	0.407812	0.503906	0.644808	0.784393	1.00464	1.24023	1.38403	1.50881	1.70879	1.80581	2.02215	2.29868	2.67155	3.08196	3.9303
0	0	0	0	0.0648908	0.101953	0.124023	0.167969	0.217389	0.248047	0.265582	0.292239	0.350791	0.380713	0.407812	0.509766	0.652819	0.788812	1.00499	1.24023	1.3899	1.50881	1.70902	1.80581	2.02466	2.31063	2.67155	3.08278	3.96875
0	0	0	0	0.066411	0.101953	0.124023	0.167969	0.218724	0.248047	0.265582	0.296045	0.350791	0.392197	0.407812	0.509766	0.652819	0.796279	1.00578	1.24023	1.3915	1.50881	1.72245	1.80747	2.03159	2.31551	2.67155	3.0889	3.97649
0	0	0	0	0.0671301	0.101953	0.124023	0.167969	0.222395	0.248047	0.265582	0.30281	0.350791	0.392197	0.407813	0.509766	0.657571	0.796279	1.01953	1.25391	1.39331	1.50981	1.72899	1.83486	2.04401	2.31839	2.67155	3.0898	3.9915
0	0	0	0	0.069001	0.101953	0.124023	0.167969	0.227974	0.248047	0.265582	0.30281	0.350791	0.392197	0.415252	0.509766	0.659609	0.800003	1.01953	1.25977	1.39578	1.52163	1.73633	1.861	2.04539	2.32285	2.67155	3.10008	3.99599
0	0	0	0	0.0709133	0.101953	0.124023	0.169939	0.227974	0.248047	0.265582	0.30281	0.350791	0.392197	0.417519	0.509766	0.66616	0.800555	1.0208	1.2607	1.39908	1.52519	1.73633	1.8804	2.04545	2.32521	2.67155	3.10522	4.00443
0	0	0	0	0.0753929	0.101953	0.124023	0.173426	0.227974	0.248047	0.265582	0.30281	0.356316	0.392197	0.419922	0.509766	0.666781	0.801453	1.02272	1.26351	1.40288	1.52699	1.73633	1.88422	2.04545	2.335	2.67155	3.10915	4.00732
0	0	0	0	0.0759405	0.101953	0.124023	0.175396	0.227974	0.248047	0.267239	0.30281	0.356316	0.392197	0.419922	0.509766	0.667887	0.80211	1.02272	1.2648	1.4188	1.52954	1.73633	1.88517	2.04545	2.33513	2.67155	3.12224	4.03497
0	0	0	0	0.0796309	0.101953	0.124023	0.175396	0.227974	0.248047	0.27052	0.30281	0.364391	0.392197	0.419922	0.509766	0.667887	0.812882	1.02272	1.2648	1.44073	1.53441	1.73633	1.88696	2.04545	2.34007	2.67581	3.13682	4.03791
0	0	0	0	0.0801022	0.101953	0.124023	0.175396	0.237544	0.248047	0.277325	0.304732	0.365161	0.392197	0.420364	0.509766	0.671336	0.815592	1.02272	1.2648	1.44204	1.53623	1.73633	1.88767	2.05937	2.34007	2.67613	3.13757	4.05612
0	0	0	0	0.0821707	0.101953	0.124023	0.175396	0.237544	0.248047	0.277325	0.305859	0.367597	0.399358	0.420364	0.509766	0.677104	0.821972	1.02272	1.2648	1.44635	1.54216	1.73964	1.88907	2.06042	2.34007	2.68143	3.13759	4.09842
0	0	0	0	0.0839844	0.101953	0.124023	0.175396	0.237544	0.248047	0.277325	0.305859	0.367597	0.400016	0.420364	0.510857	0.677104	0.82715	1.02272	1.2648	1.44635	1.54243	1.75396	1.88907	2.07005	2.35318	2.6865	3.1472	4.10591
0	0	0	0	0.0839844	0.101953	0.124023	0.175396	0.237544	0.248047	0.277325	0.305859	0.367597	0.402333	0.420364	0.510857	0.677104	0.82715	1.02272	1.2648	1.44635	1.54431	1.75396	1.88907	2.0716	2.35318	2.69525	3.14776	4.10591
0	0	0	0	0.0839844	0.10329	0.124025	0.175396	0.237544	0.248047	0.277325	0.309085	0.367597	0.407812	0.428238	0.510954	0.683922	0.831466	1.02371	1.2648	1.44635	1.56626	1.75396	1.88907	2.07679	2.36148	2.72852	3.1628	4.12324
0	0	0	0	0.0839844	0.104387	0.125444	0.175396	0.238027	0.248047	0.277325	0.30952	0.370671	0.407812	0.43255	0.511362	0.688154	0.831975	1.0322	1.2648	1.44635	1.56947	1.75396	1.90348	2.07789	2.3624	2.72852	3.16328	4.1297
0	0	0	0	0.0839844	0.109703	0.130908	0.175683	0.241582	0.248047	0.277325	0.31359	0.37207	0.407812	0.434753	0.511362	0.690074	0.831975	1.03355	1.2648	1.44635	1.56963	1.75396	1.90439	2.08631	2.36362	2.72852	3.16802	4.15802
0	0	0	0	0.0839844	0.111875	0.130946	0.178069	0.248047	0.248047	0.277325	0.319314	0.37207	0.407812	0.447173	0.511362	0.692553	0.834887	1.03579	1.2648	1.44635	1.57113	1.75396	1.90478	2.1013	2.39673	2.73232	3.16864	4.1644
0	0	0	0	0.0839844	0.112924	0.131331	0.178474	0.248047	0.248047	0.277325	0.322404	0.37207	0.407812	0.447173	0.511362	0.692553	0.839251	1.03972	1.2648	1.44635	1.5715	1.75396	1.90815	2.11905	2.39839	2.73977	3.17487	4.2168
0	0	0	0	0.0839844	0.113149	0.133348	0.185631	0.248047	0.24996	0.277325	0.322404	0.37207	0.407812	0.447173	0.519861	0.698004	0.840727	1.04012	1.2648	1.44635	1.57265	1.75396	1.91117	2.11931	2.40179	2.73977	3.18828	4.22409
0	0	0	0	0.0839844	0.113955	0.136069	0.187795	0.248047	0.251953	0.277325	0.328032	0.37207	0.407812	0.447173	0.519861	0.701583	0.84196	1.04468	1.2648	1.44635	1.58827	1.75396	1.91147	2.11931	2.40611	2.77325	3.19246	4.23799
0	0	0	0	0.0839844	0.118772	0.136557	0.187795	0.248047	0.251953	0.277325	0.329798	0.37207	0.407812	0.447173	0.519861	0.701583	0.843313	1.05237	1.2648	1.44635	1.58827	1.75396	1.92901	2.12138	2.43107	2.77325	3.19403	4.24122
0	0	0	0	0.0839844	0.118772	0.137067	0.187795	0.248047	0.251953	0.277325	0.332455	0.37207	0.407813	0.451834	0.526187	0.701583	0.846874	1.05237	1.27673	1.44635	1.58827	1.75396	1.93067	2.12739	2.43254	2.77325	3.2013	4.33195
0	0	0	0	0.0839844	0.118772	0.137573	0.187795	0.248047	0.251953	0.277325	0.334113	0.37207	0.407813	0.45227	0.526187	0.701583	0.847367	1.05237	1.2795	1.45053	1.58827	1.75396	1.93397	2.12814	2.43354	2.77325	3.20317	4.33905
0	0	0	0	0.0879672	0.118772	0.141563	0.187795	0.248047	0.251953	0.277325	0.335937	0.37559	0.407813	0.45227	0.531164	0.701583	0.863131	1.05237	1.28358	1.45107	1.58827	1.75396	1.93731	2.13378	2.4381	2.77325	3.20895	4.33905
0	0	0	0	0.0915083	0.119143	0.144183	0.187795	0.248047	0.257873	0.283561	0.335938	0.37559	0.407813	0.45227	0.531164	0.704125	0.868164	1.05237	1.2871	1.45371	1.58827	1.75396	1.93731	2.1371	2.43929	2.77325	3.21192	4.42667
0	0	0	0	0.0936323	0.119797	0.144183	0.187795	0.248047	0.259713	0.286202	0.340278	0.37559	0.407953	0.454683	0.531164	0.705757	0.872855	1.05237	1.28954	1.455	1.58827	1.75396	1.93731	2.14166	2.44298	2.77325	3.22461	4.45357
0	0	0	0	0.0941568	0.121196	0.144183	0.187795	0.248047	0.265582	0.288367	0.34241	0.377249	0.418125	0.455585	0.537762	0.712631	0.875522	1.061	1.29214	1.45526	1.58827	1.75396	1.93731	2.14264	2.44341	2.77325	3.234	4.46484
0	0	0	0	0.094237	0.122764	0.144183	0.187795	0.248047	0.265582	0.288367	0.346276	0.391741	0.419922	0.455948	0.537762	0.713672	0.876978	1.06102	1.29741	1.45859	1.58827	1.75396	1.93731	2.1441	2.44456	2.77325	3.2344	4.46484
0	0	0	0	0.0959077	0.124023	0.144183	0.187795	0.248047	0.265582	0.288367	0.346276	0.392197	0.419922	0.460615	0.543654	0.716897	0.876978	1.06442	1.29936	1.45999	1.58827	1.75396	1.94362	2.1524	2.45032	2.77325	3.23488	4.46484
0	0	0	0	0.101134	0.124023	0.144183	0.187795	0.248047	0.265582	0.288367	0.350791	0.392197	0.419922	0.461391	0.545611	0.720917	0.876978	1.07369	1.30248	1.472	1.58827	1.75396	1.94436	2.1536	2.45554	2.77325	3.23573	4.46484
0	0	0	0.00825665	0.101953	0.124023	0.145866	0.187795	0.248047	0.265582	0.288367	0.350791	0.392197	0.420364	0.471741	0.549034	0.720917	0.877034	1.07791	1.30804	1.47432	1.58827	1.75396	1.96721	2.15412	2.46277	2.77325	3.24066	4.46484
0	0	0	0.0153158	0.101953	0.124023	0.149134	0.187795	0.248047	0.265582	0.289155	0.350791	0.392197	0.420364	0.471821	0.549034	0.720917	0.883571	1.07944	1.3244	1.4756	1.58827	1.75396	1.97078	2.15489	2.46493	2.77325	3.24689	4.47173
0	0	0	0.0225971	0.101953	0.124023	0.156365	0.192723	0.248047	0.265582	0.29142	0.350791	0.392197	0.420364	0.475779	0.549034	0.720917	0.884164	1.08051	1.32605	1.47882	1.60573	1.75396	1.97166	2.16	2.46618	2.77325	3.26255	4.47173
0	0	0	0.0234074	0.101953	0.124023	0.167969	0.195387	0.248047	0.265582	0.293802	0.350791	0.392197	0.420364	0.477278	0.550978	0.722461	0.885541	1.08239	1.32791	1.48367	1.61145	1.75396	1.98321	2.16232	2.46738	2.77515	3.26255	4.47173
0	0	0	0.0242959	0.101953	0.124023	0.167969	0.195741	0.248047	0.265582	0.30281	0.350791	0.392197	0.428238	0.489709	0.55465	0.722461	0.886219	1.08352	1.32791	1.48539	1.61159	1.75396	1.98438	2.16666	2.47273	2.77925	3.28472	4.47653
0	0	0	0.0283235	0.101953	0.124023	0.167969	0.197218	0.248047	0.269029	0.30281	0.350791	0.392197	0.429534	0.489709	0.55465	0.722461	0.886397	1.08662	1.33577	1.4876	1.61209	1.75396	1.98438	2.17315	2.48008	2.79526	3.29194	4.5441
0	0	0	0.0328194	0.101953	0.124023	0.167969	0.199899	0.248047	0.271283	0.30281	0.350791	0.392197	0.447173	0.489709	0.55465	0.723037	0.890542	1.09169	1.33577	1.48813	1.61425	1.75396	1.9845	2.18226	2.48047	2.80332	3.3034	4.61394
0	0	0	0.0335792	0.101953	0.124023	0.167969	0.203906	0.248047	0.277325	0.30281	0.350791	0.392197	0.447173	0.496094	0.55465	0.723175	0.894346	1.0924	1.33577	1.48828	1.61972	1.75396	1.99982	2.18801	2.48047	2.81471	3.31463	4.6339
0	0	0	0.0360823	0.101953	0.124023	0.167969	0.203906	0.248047	0.277325	0.305144	0.350791	0.392197	0.448327	0.496094	0.55465	0.723175	0.894346	1.09502	1.33577	1.48828	1.62111	1.75396	1.99982	2.19413	2.48527	2.84211	3.31871	4.65846
0	0	0	0.0384098	0.101953	0.124023	0.167969	0.203906	0.248047	0.277325	0.305224	0.350791	0.394014	0.45227	0.496094	0.55465	0.723175	0.894346	1.09807	1.33577	1.48828	1.62784	1.75866	1.99982	2.19678	2.49284	2.8423	3.32173	4.65999
0	0	0	0.0440981	0.101953	0.124023	0.167969	0.203906	0.248047	0.277325	0.305859	0.350791	0.403804	0.45227	0.496094	0.55465	0.723175	0.894346	1.09976	1.33577	1.49515	1.62827	1.76523	1.99982	2.199	2.49284	2.84805	3.33713	4.68875
0	0	0	0.045417	0.101953	0.124023	0.167969	0.203906	0.248047	0.277325	0.305859	0.350791	0.407812	0.45227	0.496094	0.55465	0.732096	0.894346	1.1093	1.33577	1.50073	1.62938	1.77169	1.99982	2.20198	2.49284	2.84869	3.33713	4.71289
0	0	0	0.0458736	0.101953	0.124023	0.167969	0.203906	0.248047	0.277325	0.305859	0.350791	0.407812	0.455948	0.496094	0.55465	0.733448	0.894346	1.1093	1.33577	1.50881	1.62971	1.7723	1.99982	2.20623	2.49284	2.86379	3.33713	4.71289
0	0	0	0.0487538	0.101953	0.124023	0.170163	0.203906	0.248047	0.277325	0.312991	0.350791	0.407813	0.455948	0.496094	0.55465	0.735194	0.894346	1.1093	1.33577	1.50881	1.63346	1.7774	1.99982	2.20669	2.49284	2.8685	3.33713	4.71289
0	0	0	0.050836	0.101953	0.124023	0.171573	0.203906	0.248047	0.277325	0.32071	0.350791	0.407813	0.455948	0.496094	0.55465	0.735194	0.894346	1.1093	1.33577	1.50881	1.6401	1.77963	1.99982	2.21195	2.52894	2.869	3.33713	4.73893
0	0	0	0.0526504	0.101953	0.124023	0.175396	0.203906	0.248047	0.277325	0.32128	0.350791	0.407813	0.458721	0.496094	0.55465	0.74223	0.894346	1.1093	1.33577	1.50881	1.6418	1.78	1.99982	2.21248	2.52959	2.86907	3.33793	4.76482
0	0	0	0.0533527	0.101953	0.124023	0.175396	0.203906	0.248047	0.277325	0.322404	0.350791	0.407813	0.459809	0.496094	0.554734	0.743104	0.894346	1.1093	1.33577	1.50881	1.64269	1.78475	1.99982	2.2186	2.52959	2.87682	3.36085	4.77128
0	0	0	0.0541102	0.101996	0.124023	0.175396	0.203906	0.248047	0.277325	0.322404	0.350791	0.41965	0.463506	0.496094	0.56078	0.744141	0.894346	1.1093	1.34675	1.51604	1.64334	1.78529	2.00069	2.2186	2.52959	2.87907	3.36306	4.79058
0	0	0	0.0548264	0.103142	0.124023	0.175396	0.203906	0.248047	0.277325	0.322404	0.350791	0.419922	0.4706	0.496094	0.563384	0.744141	0.906133	1.11087	1.34755	1.51676	1.64476	1.78593	2.01182	2.2186	2.52959	2.88066	3.39566	4.80741
0	0	0	0.0556207	0.103279	0.124023	0.175396	0.203906	0.248047	0.277325	0.322404	0.350791	0.419922	0.475087	0.496094	0.563384	0.744141	0.906408	1.11439	1.35127	1.52	1.65277	1.78869	2.0139	2.2186	2.52959	2.88577	3.41799	4.87335
0	0	0	0.0567151	0.103396	0.124023	0.175396	0.211046	0.248047	0.277325	0.322404	0.350791	0.419922	0.475087	0.503906	0.563753	0.744141	0.906907	1.11935	1.35421	1.52424	1.65495	1.78869	2.02123	2.2186	2.52959	2.8927	3.41965	4.87335
0	0	0	0.0568447	0.106134	0.124023	0.175396	0.21703	0.248047	0.277325	0.322404	0.350791	0.419922	0.475087	0.50604	0.576734	0.744141	0.907625	1.11983	1.35481	1.53083	1.65903	1.78869	2.02466	2.22052	2.52959	2.8927	3.44319	4.88264
0	0	0	0.0644239	0.106523	0.124023	0.175396	0.218108	0.248047	0.277325	0.325977	0.350791	0.419922	0.481647	0.509766	0.59268	0.745901	0.912902	1.12462	1.35839	1.53288	1.6625	1.79293	2.03111	2.2209	2.53238	2.91365	3.45489	4.88607
0	0	0	0.0678608	0.106609	0.124023	0.175396	0.220073	0.248047	0.277325	0.332559	0.35754	0.420364	0.485374	0.509766	0.593577	0.747092	0.916037	1.13432	1.36209	1.53396	1.66281	1.7989	2.03431	2.23242	2.53812	2.91884	3.45489	4.88836
0	0	0	0.0687094	0.113358	0.124023	0.175396	0.220504	0.248047	0.277325	0.335938	0.359485	0.420364	0.486966	0.509766	0.593859	0.748	0.916295	1.13762	1.38701	1.53896	1.66312	1.8012	2.03607	2.23764	2.58277	2.92261	3.46064	4.96094
0	0	0	0.0694448	0.11515	0.124023	0.175396	0.222795	0.248047	0.277325	0.335938	0.359631	0.420364	0.487291	0.509766	0.593859	0.753547	0.919072	1.13904	1.38941	1.5396	1.66318	1.80581	2.04044	2.24293	2.58731	2.92894	3.46681	4.96094
0	0	0	0.0694587	0.115468	0.124023	0.175396	0.223451	0.248047	0.277325	0.335938	0.367597	0.420364	0.488107	0.509766	0.594484	0.754405	0.927638	1.13987	1.39438	1.54056	1.66395	1.80581	2.04462	2.24616	2.58969	2.92923	3.4815	4.96713
0	0	0	0.0711295	0.116135	0.124023	0.175396	0.223877	0.248047	0.277382	0.335938	0.367597	0.427102	0.489709	0.509766	0.594484	0.754944	0.927695	1.14231	1.40317	1.54217	1.66395	1.80581	2.04545	2.24616	2.58969	2.92943	3.5067	4.98568
0	0	0	0.0716273	0.116404	0.124023	0.175396	0.227974	0.248047	0.278544	0.335938	0.367597	0.428238	0.489709	0.509766	0.594484	0.769424	0.929095	1.14646	1.40317	1.54668	1.66395	1.80581	2.04545	2.25157	2.58969	2.93867	3.50791	5.01644
0	0	0	0.0723618	0.118772	0.124023	0.175396	0.227974	0.248047	0.282306	0.338773	0.367597	0.428238	0.489709	0.509766	0.60562	0.774298	0.929838	1.15093	1.40317	1.54869	1.66395	1.80581	2.04545	2.2688	2.58969	2.94277	3.50791	5.01644
0	0	0	0.0741764	0.118772	0.124023	0.175396	0.227974	0.248047	0.288367	0.346276	0.37207	0.428238	0.489905	0.509766	0.607015	0.776452	0.93505	1.15267	1.40504	1.55015	1.66395	1.80747	2.04545	2.2689	2.58969	2.94353	3.50791	5.05918
0	0	0	0.0746494	0.118772	0.124023	0.175396	0.227974	0.248047	0.288367	0.346276	0.37207	0.428238	0.496094	0.509766	0.611415	0.781754	0.938974	1.15871	1.40722	1.55022	1.66735	1.8082	2.04561	2.27868	2.58969	2.94915	3.51748	5.05918
0	0	0	0.0778824	0.118772	0.124023	0.175396	0.227974	0.248047	0.288367	0.346276	0.37207	0.431396	0.496094	0.510857	0.611415	0.781832	0.944058	1.15924	1.40723	1.55502	1.67076	1.81337	2.0468	2.28156	2.58969	2.96112	3.54239	5.0895
0	0	0	0.0783675	0.118772	0.124023	0.175396	0.227974	0.248047	0.288367	0.346276	0.37207	0.43255	0.496094	0.511362	0.611415	0.784393	0.944534	1.1619	1.40923	1.55749	1.68012	1.81561	2.05944	2.28688	2.60258	2.97438	3.54995	5.11362
0	0	0	0.0784982	0.118772	0.124023	0.176029	0.227974	0.248047	0.288367	0.346276	0.37207	0.43255	0.496094	0.512477	0.620117	0.784393	0.945851	1.16427	1.41006	1.55782	1.68586	1.82404	2.07032	2.28775	2.60712	2.97656	3.55374	5.11362
0	0	0	0.0794363	0.121275	0.124023	0.176238	0.227974	0.248047	0.288367	0.346276	0.37207	0.447173	0.496094	0.514545	0.620117	0.784393	0.951086	1.16815	1.41329	1.55834	1.68625	1.82587	2.07357	2.2951	2.60832	2.97656	3.55867	5.22913
0	0	0	0.0798662	0.121514	0.124023	0.181847	0.227974	0.248047	0.288367	0.350791	0.37207	0.447173	0.496094	0.519861	0.620117	0.784393	0.961877	1.16885	1.41844	1.55973	1.69091	1.82646	2.07418	2.31243	2.60946	2.97656	3.56599	5.23008
0	0	0	0.0812567	0.121898	0.124023	0.184987	0.229592	0.248047	0.293438	0.350791	0.37207	0.447173	0.496094	0.519861	0.620117	0.784393	0.962106	1.16977	1.4186	1.56112	1.69112	1.83416	2.08194	2.32077	2.62706	2.97677	3.56615	5.26187
0	0	0	0.0833962	0.122155	0.124023	0.187795	0.229654	0.248047	0.296856	0.350791	0.37559	0.447173	0.496094	0.519861	0.620117	0.784393	0.96711	1.16977	1.41961	1.56252	1.69743	1.84696	2.08257	2.33163	2.63677	2.98304	3.58585	5.27733
0	0	0	0.0839844	0.122516	0.124023	0.187795	0.235692	0.248047	0.30281	0.350791	0.37559	0.447173	0.496094	0.519861	0.620117	0.784393	0.968654	1.17376	1.42707	1.56879	1.70125	1.8532	2.08425	2.34007	2.63677	2.9853	3.58876	5.34309
0	0	0	0.0839844	0.122843	0.124023	0.187795	0.237544	0.248047	0.30281	0.350791	0.37559	0.447173	0.496094	0.520113	0.620157	0.784393	0.969081	1.17659	1.42756	1.56879	1.70481	1.85418	2.08637	2.34007	2.63726	2.98537	3.5995	5.3546
0	0	0	0.0839844	0.123228	0.125606	0.187795	0.237544	0.248047	0.30281	0.350791	0.37559	0.447173	0.496094	0.521726	0.620157	0.784393	0.971192	1.17827	1.42872	1.56879	1.70727	1.85837	2.08974	2.34007	2.65926	2.98688	3.61162	5.46267
0	0	0	0.0839844	0.124023	0.127339	0.187795	0.237544	0.248047	0.30281	0.350791	0.37559	0.447173	0.496094	0.526187	0.629361	0.784393	0.975133	1.18586	1.42993	1.57395	1.70858	1.86467	2.09414	2.34151	2.67155	2.98688	3.61326	5.51685
0	0	0	0.0839844	0.124023	0.128943	0.187795	0.237544	0.248047	0.30281	0.350791	0.37559	0.452134	0.496094	0.530637	0.631403	0.787297	0.977816	1.19024	1.43021	1.57454	1.71058	1.8684	2.09688	2.34237	2.67155	2.98688	3.62427	5.5376
0	0	0	0.0839844	0.124023	0.129	0.187795	0.237544	0.248047	0.30281	0.350791	0.37559	0.45227	0.496094	0.531164	0.632398	0.78819	0.98175	1.2162	1.43209	1.57834	1.71713	1.87254	2.09865	2.34901	2.67155	2.98688	3.63149	5.5465
0	0	0	0.0839844	0.124023	0.12928	0.187795	0.237544	0.248047	0.30281	0.350791	0.37559	0.45227	0.496094	0.535913	0.632398	0.791911	0.981757	1.21698	1.43528	1.57897	1.71804	1.87686	2.09921	2.35318	2.67155	2.99716	3.63703	5.71047
0	0	0	0.0839844	0.124023	0.131745	0.187795	0.239118	0.248047	0.30281	0.350791	0.376106	0.45227	0.496785	0.537762	0.63698	0.794137	0.983387	1.22242	1.43751	1.57989	1.72307	1.87689	2.10209	2.35318	2.67155	2.99716	3.64702	5.7534
0	0	0	0.0839844	0.124023	0.132223	0.187795	0.239272	0.248047	0.30281	0.350791	0.37642	0.45227	0.508469	0.549034	0.639606	0.794137	0.985873	1.22397	1.43922	1.58053	1.72392	1.87812	2.10475	2.35356	2.67155	3.00255	3.65606	5.80663
0	0	0	0.0839844	0.124023	0.132262	0.187795	0.242387	0.248047	0.30281	0.350791	0.392197	0.45227	0.508581	0.549034	0.639606	0.796279	0.987047	1.2334	1.44635	1.58084	1.72739	1.88444	2.1058	2.35972	2.67381	3.00932	3.66665	5.8814
0	0	0	0.0851007	0.124023	0.132936	0.188812	0.247849	0.248047	0.30281	0.350791	0.392197	0.45227	0.509766	0.549034	0.64554	0.796279	0.987783	1.23751	1.44635	1.58333	1.73633	1.88696	2.10861	2.36611	2.68692	3.01618	3.68748	5.88614
0	0	0	0.086671	0.124023	0.138467	0.191595	0.248047	0.248047	0.30281	0.356316	0.392197	0.455948	0.509766	0.549034	0.65213	0.796746	0.992188	1.24023	1.44635	1.58517	1.73633	1.88907	2.10909	2.37797	2.70425	3.01657	3.68748	5.96345
0	0	0	0.0879672	0.124023	0.138551	0.193718	0.248047	0.248047	0.30281	0.356316	0.392197	0.455948	0.509766	0.549034	0.652819	0.796746	0.992188	1.24023	1.44635	1.58784	1.73633	1.88907	2.1091	2.38348	2.71212	3.01762	3.68748	5.96345
0	0	0	0.0883957	0.124023	0.138826	0.198238	0.248047	0.248047	0.30281	0.356316	0.392197	0.455948	0.509766	0.549034	0.652819	0.796746	0.992188	1.24023	1.44635	1.58827	1.73633	1.88907	2.11098	2.39125	2.71432	3.01803	3.68748	5.99432
0	0	0	0.0884235	0.124023	0.144183	0.200725	0.248047	0.248047	0.30281	0.356881	0.392197	0.455948	0.509766	0.549034	0.652819	0.810014	0.992188	1.24023	1.44635	1.58827	1.73677	1.88907	2.11159	2.40243	2.71486	3.033	3.68748	6.22098
0	0	0	0.0895785	0.124023	0.144183	0.201033	0.248047	0.248047	0.30281	0.35746	0.392197	0.455948	0.509766	0.549034	0.652819	0.812995	0.99533	1.24023	1.44635	1.58827	1.73996	1.88907	2.11395	2.40817	2.71775	3.03986	3.70092	6.22098
0	0	0	0.0962513	0.124023	0.144183	0.201489	0.248047	0.248047	0.30281	0.358125	0.392197	0.455948	0.509766	0.550664	0.652819	0.821036	0.998447	1.24023	1.44635	1.58827	1.74736	1.89298	2.1143	2.41699	2.72852	3.04087	3.70132	6.24566
0	0	0	0.0973587	0.124023	0.148245	0.201786	0.248047	0.248047	0.30281	0.360364	0.392197	0.461452	0.509766	0.551864	0.655939	0.821972	1.00692	1.24023	1.44635	1.58827	1.75396	1.89461	2.11514	2.42925	2.72906	3.05929	3.70263	6.28005
0	0	0	0.0993779	0.124023	0.150312	0.203906	0.248047	0.248047	0.30281	0.361374	0.392197	0.465887	0.510857	0.552728	0.656387	0.823795	1.00708	1.24023	1.44635	1.58827	1.75396	1.90429	2.11931	2.43076	2.73047	3.06817	3.7207	6.37727
0	0	0	0.0995216	0.124023	0.152268	0.203906	0.248047	0.248047	0.30281	0.365284	0.392197	0.4706	0.511362	0.55465	0.659199	0.82662	1.01431	1.24023	1.44828	1.58827	1.75396	1.90815	2.11931	2.44298	2.7384	3.07366	3.7207	6.42672
0	0	0	0.100072	0.124023	0.153228	0.203906	0.248047	0.248047	0.30466	0.36566	0.395645	0.47535	0.511362	0.55465	0.659299	0.831408	1.01953	1.24023	1.45068	1.58827	1.75396	1.91099	2.11947	2.44298	2.73977	3.08061	3.74351	6.46827
0	0	0	0.101502	0.124023	0.154309	0.203906	0.248047	0.248047	0.305859	0.366838	0.397692	0.475696	0.511362	0.55465	0.661853	0.831975	1.01953	1.24023	1.4528	1.58827	1.75396	1.91442	2.12656	2.44351	2.73977	3.08229	3.74799	6.59077
0	0	0	0.101953	0.124023	0.155017	0.203906	0.248047	0.248047	0.305859	0.367597	0.401702	0.484888	0.511362	0.55465	0.664149	0.831975	1.02272	1.24023	1.4592	1.58827	1.75396	1.91444	2.13378	2.44814	2.73977	3.08758	3.75363	6.67887
0	0	0	0.101953	0.124023	0.164072	0.203906	0.248047	0.248047	0.305859	0.367597	0.407813	0.486128	0.511362	0.55465	0.667398	0.832757	1.02272	1.24023	1.46223	1.58827	1.75396	1.91971	2.13378	2.44891	2.73977	3.09726	3.77095	6.81113
0	0	0	0.101953	0.124023	0.16541	0.203906	0.248047	0.248047	0.305859	0.367597	0.407813	0.488802	0.511362	0.55465	0.667784	0.833098	1.02272	1.24023	1.46865	1.58827	1.75396	1.92901	2.13378	2.4529	2.73977	3.10008	3.78912	6.84268
0	0	0	0.101953	0.124023	0.167969	0.203906	0.248047	0.248047	0.305859	0.367597	0.407813	0.489159	0.513403	0.55465	0.667887	0.835382	1.02272	1.24197	1.47009	1.58827	1.75396	1.92975	2.13378	2.45554	2.74201	3.10082	3.79439	6.86064
0	0	0	0.101953	0.124023	0.167969	0.203906	0.248047	0.248047	0.306767	0.367597	0.408986	0.489709	0.513498	0.55465	0.667887	0.836068	1.02272	1.25138	1.47485	1.58827	1.75396	1.93427	2.13657	2.45607	2.74896	3.10658	3.80292	6.89195
0	0	0	0.101953	0.124023	0.167969	0.203906	0.248047	0.248047	0.312273	0.367597	0.417932	0.489746	0.518123	0.55465	0.671416	0.841309	1.02272	1.25918	1.47514	1.58827	1.75396	1.93667	2.1461	2.4763	2.76057	3.10708	3.81031	7.23175
0	0	0	0.101953	0.124023	0.167969	0.203906	0.248047	0.248047	0.317653	0.367597	0.419922	0.495021	0.519861	0.55465	0.672818	0.846372	1.02462	1.26256	1.4826	1.58827	1.75396	1.93731	2.16234	2.48047	2.76426	3.10777	3.81742	7.29949
0	0	0	0.101953	0.124023	0.167969	0.203906	0.248047	0.248047	0.319051	0.37207	0.419922	0.496094	0.519861	0.55465	0.673422	0.85429	1.02572	1.26446	1.48385	1.58827	1.75396	1.93731	2.16572	2.48047	2.76691	3.1083	3.83699	7.44554
0	0	0	0.101953	0.124023	0.167969	0.203906	0.248047	0.25187	0.322077	0.37207	0.419922	0.496094	0.519861	0.55465	0.67514	0.856476	1.026	1.2648	1.48661	1.58827	1.75396	1.93731	2.16634	2.48047	2.76694	3.10886	3.84989	7.6614
0	0	0	0.101953	0.124023	0.167969	0.203906	0.248047	0.251953	0.322404	0.37207	0.419922	0.496094	0.519861	0.55465	0.677104	0.856575	1.02697	1.2648	1.48828	1.58827	1.75396	1.93731	2.16678	2.48047	2.77325	3.11424	3.85072	7.70145
0	0	0	0.101953	0.124023	0.167969	0.203906	0.248047	0.251953	0.322404	0.37207	0.419922	0.496094	0.519861	0.55465	0.677104	0.857083	1.02767	1.2648	1.48828	1.58827	1.75396	1.93731	2.16878	2.48047	2.77325	3.11727	3.85072	7.7651
0	0	0	0.101953	0.124023	0.168129	0.203906	0.248047	0.251953	0.322404	0.37207	0.420364	0.496094	0.519861	0.55465	0.683922	0.859787	1.02929	1.2648	1.48828	1.58827	1.75396	1.93731	2.1696	2.48047	2.77325	3.12899	3.87462	7.84393
0	0	0	0.101953	0.124023	0.168734	0.207269	0.248047	0.251953	0.322404	0.37207	0.420364	0.496094	0.519861	0.558065	0.683922	0.860714	1.03035	1.2648	1.48828	1.58827	1.75396	1.93798	2.16988	2.48047	2.77325	3.13179	3.87462	7.88305
0	0	0	0.101953	0.124023	0.17053	0.207401	0.248047	0.251953	0.322404	0.37207	0.420364	0.496094	0.52073	0.562069	0.687339	0.86241	1.03883	1.2648	1.49205	1.58967	1.75396	1.94263	2.17015	2.48047	2.77325	3.15214	3.87707	8.07963
0	0	0	0.101953	0.124023	0.17105	0.213551	0.248047	0.253411	0.322404	0.37207	0.420364	0.496094	0.526187	0.56722	0.691041	0.864672	1.03942	1.2648	1.493	1.59277	1.75396	1.94558	2.1714	2.48349	2.77325	3.15372	3.87926	8.09865
0	0	0	0.101953	0.124023	0.17117	0.213728	0.248047	0.255739	0.322902	0.37207	0.420364	0.496094	0.526187	0.571281	0.691669	0.864672	1.03972	1.2648	1.49482	1.59591	1.75396	1.94668	2.17727	2.49215	2.77325	3.15712	3.88255	8.24546
0	0	0	0.101953	0.124023	0.17266	0.216154	0.248047	0.260785	0.335938	0.37207	0.420364	0.496094	0.531164	0.576905	0.692553	0.866875	1.03972	1.2648	1.49597	1.59591	1.75396	1.94824	2.18219	2.49284	2.77325	3.15947	3.88743	8.39337
0	0	0	0.101953	0.124023	0.172767	0.216922	0.248047	0.261682	0.335938	0.37207	0.424211	0.496094	0.537762	0.578085	0.697477	0.868164	1.04204	1.2648	1.49743	1.59646	1.75396	1.95297	2.18643	2.49284	2.77325	3.16604	3.88979	8.42264
0	0	0	0.102492	0.124023	0.174842	0.220339	0.248047	0.263459	0.335938	0.37207	0.427558	0.496094	0.537762	0.582159	0.698836	0.868164	1.04699	1.2648	1.4998	1.59677	1.75396	1.95445	2.1884	2.49284	2.77325	3.17046	3.8898	8.61048
0	0	0	0.102754	0.124023	0.175396	0.222171	0.248047	0.265582	0.335938	0.37207	0.428111	0.496094	0.538019	0.584152	0.701583	0.868818	1.05077	1.2648	1.50498	1.59812	1.75396	1.96901	2.19518	2.49373	2.77325	3.18172	3.90324	8.7908
0	0	0	0.103626	0.124023	0.175396	0.224164	0.248047	0.265582	0.3366	0.37207	0.428238	0.496094	0.539991	0.585373	0.701583	0.869618	1.05237	1.2648	1.50881	1.5998	1.75396	1.97054	2.20169	2.50364	2.77325	3.19112	3.91682	8.7908
0	0	0	0.103953	0.124023	0.175396	0.227974	0.248047	0.265582	0.340673	0.37559	0.428238	0.496094	0.543129	0.590398	0.701583	0.869831	1.05237	1.2648	1.50881	1.60645	1.75396	1.97078	2.20336	2.50582	2.77325	3.196	3.91748	8.94346
0	0	0	0.104457	0.124023	0.175396	0.227974	0.248047	0.265582	0.346276	0.37559	0.428238	0.496094	0.543204	0.593859	0.701583	0.87569	1.05237	1.2648	1.50881	1.60665	1.75396	1.98438	2.2186	2.50833	2.77325	3.19865	3.92197	8.96064
0	0	0	0.104541	0.124023	0.175396	0.227974	0.248047	0.265582	0.346276	0.37559	0.428238	0.496094	0.548243	0.593859	0.701583	0.876978	1.05237	1.2648	1.50881	1.61373	1.75396	1.98438	2.2186	2.50844	2.77325	3.2059	3.92197	9.02904
0	0	0	0.105567	0.124023	0.175396	0.227974	0.248047	0.265582	0.346276	0.37559	0.429824	0.496094	0.549034	0.593859	0.701583	0.876978	1.05237	1.2648	1.50881	1.61617	1.75396	1.98438	2.2186	2.51145	2.77325	3.20706	3.92197	9.50703
0	0	0	0.108443	0.124023	0.175396	0.227974	0.248047	0.265582	0.347157	0.37559	0.43255	0.496094	0.549034	0.593859	0.704241	0.877782	1.05237	1.2648	1.50881	1.62337	1.75396	1.98438	2.21867	2.51428	2.78709	3.21884	3.92197	9.70241
0	0	0	0.109407	0.124023	0.175396	0.227974	0.248047	0.274295	0.350791	0.37559	0.43255	0.496094	0.549034	0.593859	0.705883	0.882942	1.05237	1.2648	1.50881	1.63116	1.75396	1.98653	2.22558	2.51912	2.79504	3.2216	3.94803	10.2152
0	0	0	0.110252	0.124023	0.175396	0.227974	0.248047	0.277325	0.350791	0.375678	0.43255	0.496094	0.549034	0.593859	0.706336	0.887099	1.0545	1.271	1.50881	1.6314	1.75396	1.99406	2.23242	2.52672	2.79546	3.22399	3.95751	10.2693
0	0	0	0.111116	0.124023	0.175396	0.227974	0.248047	0.277325	0.350791	0.382288	0.433252	0.496094	0.549034	0.594484	0.713119	0.887934	1.06233	1.27226	1.50881	1.64023	1.75396	1.99629	2.23242	2.52959	2.79731	3.22461	3.96107	10.323
0	0	0	0.11187	0.124023	0.175396	0.227974	0.248047	0.277325	0.350791	0.392197	0.43451	0.497212	0.549034	0.594484	0.713672	0.89133	1.06233	1.27921	1.51181	1.64193	1.75701	1.99698	2.2345	2.52959	2.79767	3.22461	3.96875	10.3647
0	0	0	0.112144	0.124023	0.175396	0.227974	0.248047	0.277325	0.350791	0.392197	0.447173	0.498061	0.55406	0.59973	0.713672	0.894346	1.06442	1.29057	1.51234	1.64487	1.75955	1.99977	2.23493	2.52959	2.80205	3.22648	3.96875	10.3884
0	0	0	0.112602	0.124023	0.175396	0.227974	0.248047	0.277325	0.350791	0.392197	0.447173	0.499059	0.55465	0.603132	0.716347	0.894346	1.06442	1.29484	1.51318	1.6449	1.76212	1.99978	2.23831	2.52959	2.80726	3.2299	3.96982	10.4445
0	0	0	0.113082	0.124023	0.180086	0.227974	0.248047	0.277325	0.350791	0.392197	0.447173	0.502051	0.55465	0.604186	0.720917	0.894346	1.06442	1.29675	1.51431	1.65213	1.76804	1.99982	2.24116	2.52959	2.80877	3.23276	3.97204	10.5762
0	0	0	0.114487	0.124023	0.180198	0.227974	0.248047	0.277325	0.350791	0.392197	0.447173	0.502667	0.55465	0.60562	0.720917	0.894346	1.06983	1.3123	1.51473	1.65635	1.76812	1.99982	2.24616	2.52959	2.81152	3.23414	3.97649	10.7379
0	0	0	0.114834	0.124023	0.182506	0.227974	0.248047	0.277325	0.350791	0.392197	0.447173	0.503906	0.55465	0.60562	0.720917	0.894346	1.07857	1.3131	1.52552	1.6615	1.77301	1.99982	2.24616	2.52959	2.81281	3.23414	3.97649	10.7693
0	0	0	0.115743	0.124023	0.182793	0.227974	0.248047	0.277325	0.350791	0.392197	0.447173	0.503906	0.55465	0.605924	0.722461	0.894346	1.08124	1.31468	1.52564	1.66161	1.77404	1.99982	2.24616	2.53333	2.8286	3.23488	3.99612	10.9253
0	0	0	0.116608	0.124023	0.183883	0.229638	0.248047	0.277325	0.350791	0.392197	0.448258	0.506076	0.55465	0.611415	0.723175	0.894346	1.08345	1.3161	1.5259	1.66395	1.77609	1.99982	2.24616	2.54964	2.84111	3.241	3.99964	11.1069
0	0	0	0.118098	0.124023	0.184133	0.230586	0.248047	0.277325	0.350791	0.392197	0.450311	0.507765	0.55465	0.611719	0.723175	0.894346	1.08921	1.32064	1.52599	1.66605	1.77963	1.99982	2.24616	2.5538	2.84369	3.2465	4.00732	11.1869
0	0	0	0.118446	0.124023	0.184779	0.232722	0.248047	0.277325	0.350791	0.392197	0.45227	0.507883	0.55465	0.611719	0.723537	0.896514	1.09807	1.32329	1.52863	1.66716	1.78529	2.00022	2.24616	2.5538	2.84493	3.2547	4.00732	11.1869
0	0	0	0.118772	0.124023	0.185389	0.233346	0.248047	0.277325	0.350791	0.392197	0.45227	0.509766	0.55465	0.611719	0.727304	0.899546	1.10057	1.32548	1.53027	1.66852	1.78797	2.00101	2.24616	2.5538	2.84869	3.25897	4.01152	11.3236
0	0	0	0.118772	0.124023	0.185499	0.234919	0.248047	0.277325	0.350791	0.398376	0.455948	0.509766	0.55465	0.611736	0.734361	0.902904	1.10413	1.32791	1.53863	1.67454	1.78869	2.00193	2.25352	2.5538	2.85588	3.28174	4.02246	11.4344
0	0	0	0.118772	0.124023	0.187553	0.237161	0.248047	0.277325	0.350791	0.402261	0.455948	0.509766	0.55465	0.615391	0.738182	0.902904	1.10464	1.33577	1.5403	1.67859	1.78869	2.00516	2.26192	2.56173	2.86021	3.28869	4.02688	11.9088
0	0	0	0.118772	0.126056	0.187795	0.237544	0.248047	0.277325	0.350791	0.404691	0.455948	0.509766	0.55465	0.617474	0.742824	0.904539	1.1093	1.33577	1.54415	1.68265	1.79957	2.0096	2.2663	2.5618	2.86784	3.29026	4.03791	11.9295
0	0	0	0.118772	0.126388	0.187795	0.237544	0.248047	0.277325	0.350791	0.405704	0.45812	0.509766	0.55465	0.620117	0.742938	0.904609	1.1093	1.33577	1.54623	1.68265	1.80581	2.01283	2.26827	2.5621	2.86907	3.29194	4.04341	12.1137
0	0	0	0.118772	0.126533	0.187795	0.237544	0.248047	0.277325	0.350791	0.407812	0.462924	0.509766	0.55465	0.620117	0.744141	0.90843	1.1093	1.33577	1.54938	1.68405	1.80581	2.02115	2.27193	2.5732	2.87224	3.30936	4.06827	12.1137
0	0	0	0.118772	0.127616	0.187795	0.237544	0.248047	0.277325	0.350791	0.407812	0.464835	0.509766	0.55465	0.620117	0.744141	0.914057	1.1093	1.33577	1.55025	1.68422	1.80581	2.02278	2.27453	2.57445	2.87306	3.30936	4.06827	12.1568
0	0	0	0.118772	0.130076	0.187795	0.237544	0.248047	0.277325	0.350791	0.407813	0.466914	0.509766	0.55465	0.620117	0.744141	0.915411	1.1093	1.33577	1.55063	1.69072	1.80581	2.02376	2.27837	2.58808	2.87823	3.30977	4.07473	12.2174
0	0	0.00534597	0.118797	0.130358	0.187795	0.238103	0.248047	0.277325	0.350791	0.407813	0.470491	0.509766	0.55465	0.620117	0.744141	0.916038	1.11543	1.33577	1.55343	1.69331	1.80747	2.03896	2.28688	2.58969	2.88265	3.32627	4.1057	12.2451
0	0	0.00805389	0.119069	0.132428	0.187795	0.239571	0.248047	0.277325	0.350791	0.409198	0.4706	0.510857	0.55465	0.620117	0.744141	0.916414	1.11621	1.33577	1.55441	1.70094	1.80787	2.04545	2.28688	2.58969	2.88826	3.33698	4.10591	12.4023
0	0	0.0107872	0.120701	0.134905	0.189024	0.239986	0.248047	0.277325	0.350791	0.410561	0.470901	0.510857	0.55465	0.620117	0.744141	0.920421	1.11927	1.33577	1.55568	1.70221	1.81259	2.04545	2.28688	2.58969	2.88899	3.33713	4.10591	13.1949
0	0	0.0166773	0.120889	0.134946	0.190698	0.242328	0.248047	0.277325	0.35095	0.414046	0.473504	0.511362	0.55465	0.620117	0.744141	0.921199	1.12308	1.33577	1.55585	1.70427	1.81632	2.04545	2.29214	2.58969	2.8907	3.33713	4.10591	13.2713
0	0	0.0184032	0.121631	0.135224	0.192885	0.243167	0.248047	0.277325	0.354514	0.414327	0.475087	0.511362	0.55465	0.620117	0.744141	0.925738	1.12568	1.33619	1.55813	1.70774	1.82603	2.04545	2.29383	2.58969	2.8927	3.33793	4.12867	13.5362
0	0	0.02216	0.122053	0.135968	0.19337	0.245466	0.248047	0.277325	0.355552	0.419922	0.475104	0.511362	0.555423	0.620117	0.744141	0.927357	1.1272	1.3392	1.55901	1.70835	1.83393	2.04545	2.30504	2.58969	2.8927	3.34228	4.15802	13.5543
0	0	0.0240402	0.122537	0.138714	0.193741	0.246422	0.248047	0.277325	0.356316	0.419922	0.477171	0.511362	0.558792	0.620157	0.744141	0.928015	1.12873	1.33937	1.55973	1.70923	1.83693	2.04638	2.31117	2.58969	2.89496	3.35449	4.15802	13.884
0	0	0.0246835	0.124023	0.141964	0.194214	0.246943	0.248047	0.288367	0.361723	0.419922	0.48174	0.511362	0.563384	0.620157	0.744141	0.931218	1.13012	1.352	1.56023	1.7108	1.84121	2.04807	2.32154	2.59159	2.89575	3.36278	4.15802	14.4316
0	0	0.025053	0.124023	0.143178	0.19438	0.247523	0.248047	0.288367	0.367597	0.419922	0.486784	0.511362	0.569836	0.629415	0.744141	0.934371	1.142	1.35421	1.56403	1.71212	1.84301	2.052	2.32516	2.60022	2.91365	3.36774	4.16178	15.3007
0	0	0.0272225	0.124023	0.14328	0.197193	0.248047	0.248047	0.288367	0.367597	0.419922	0.486989	0.511362	0.576734	0.630954	0.745823	0.937051	1.14344	1.35523	1.56425	1.71447	1.84962	2.05385	2.33058	2.60586	2.91369	3.37	4.1757	15.3087
0	0	0.0289738	0.124023	0.143554	0.197516	0.248047	0.248047	0.288367	0.367597	0.419922	0.488518	0.511362	0.576734	0.631946	0.751179	0.93775	1.15223	1.35815	1.56515	1.71963	1.84979	2.06802	2.33333	2.61487	2.9158	3.37017	4.1922	15.7583
0	0	0.0300313	0.124023	0.144183	0.198656	0.248047	0.248047	0.288367	0.367597	0.419922	0.489177	0.513594	0.579243	0.632398	0.751179	0.938974	1.15418	1.36161	1.5657	1.73101	1.85234	2.06838	2.34007	2.61965	2.92019	3.3738	4.19445	15.8769
0	0	0.0319937	0.124023	0.144183	0.200754	0.248047	0.248047	0.290206	0.367597	0.419922	0.489709	0.517323	0.579495	0.632398	0.75287	0.939961	1.15471	1.36401	1.56879	1.73166	1.86354	2.07401	2.34007	2.63526	2.92331	3.40927	4.2168	16.388
0	0	0.0328194	0.124023	0.144183	0.203906	0.248047	0.248047	0.293686	0.367597	0.420364	0.489709	0.519861	0.58636	0.635265	0.754405	0.940183	1.15794	1.3663	1.56879	1.73633	1.86718	2.08888	2.34007	2.63647	2.9272	3.42911	4.2168	17.8611
0	0	0.0331412	0.124023	0.144183	0.203906	0.248047	0.248047	0.295003	0.367597	0.420364	0.489709	0.519861	0.587891	0.644808	0.754405	0.940406	1.16237	1.36728	1.56879	1.73633	1.87513	2.09232	2.34007	2.63677	2.93058	3.43705	4.2168	17.8904
0	0	0.0345367	0.124023	0.144183	0.203906	0.248047	0.248047	0.295639	0.367597	0.420364	0.489709	0.519861	0.593859	0.644808	0.754405	0.944534	1.16755	1.36899	1.56879	1.73633	1.87944	2.09354	2.34007	2.63681	2.93133	3.44109	4.2168	17.9984
0	0	0.0360823	0.124023	0.144183	0.203906	0.248047	0.248047	0.300924	0.367597	0.420364	0.489709	0.519861	0.593859	0.644808	0.75445	0.945483	1.16775	1.3701	1.56879	1.73633	1.88101	2.09568	2.34007	2.64634	2.93928	3.44812	4.2168	18.4241
0	0	0.0395446	0.124023	0.144183	0.203906	0.248047	0.248047	0.301139	0.371014	0.420364	0.489709	0.519861	0.593859	0.644808	0.759848	0.946576	1.1689	1.37388	1.56879	1.73633	1.8868	2.09924	2.34007	2.65101	2.94277	3.45489	4.22046	18.6035
0	0	0.0401291	0.124023	0.144725	0.203906	0.248047	0.248047	0.302458	0.37207	0.420364	0.492237	0.519861	0.594484	0.646552	0.760511	0.951338	1.16977	1.37431	1.57114	1.73633	1.88907	2.10145	2.34007	2.65244	2.94557	3.45489	4.22409	18.7107
0	0	0.0411618	0.124023	0.145774	0.203906	0.248047	0.248047	0.30281	0.37207	0.420364	0.493314	0.521197	0.594484	0.647621	0.772131	0.957569	1.17003	1.37524	1.57298	1.74622	1.88907	2.10555	2.34007	2.65468	2.95911	3.45489	4.22409	18.7747
0	0	0.0422753	0.124023	0.146718	0.203906	0.248047	0.248047	0.30281	0.37207	0.421138	0.495674	0.523152	0.594484	0.649825	0.774298	0.957984	1.17831	1.37693	1.57862	1.74634	1.88907	2.11086	2.34007	2.65893	2.96746	3.45989	4.22409	19.3548
0	0	0.0451616	0.124023	0.146973	0.203906	0.248047	0.248047	0.30281	0.37207	0.428238	0.496094	0.525663	0.594484	0.651191	0.784141	0.95909	1.17991	1.38337	1.58506	1.74785	1.88907	2.11399	2.34144	2.66256	2.96978	3.462	4.24588	19.3787
0	0	0.0504416	0.124023	0.147745	0.203906	0.248047	0.248047	0.30281	0.37207	0.428238	0.496094	0.526187	0.595678	0.652819	0.784393	0.961824	1.18703	1.38494	1.58615	1.75179	1.89455	2.11931	2.34168	2.66257	2.9734	3.47266	4.2587	19.4126
0	0	0.0507298	0.124023	0.148907	0.203906	0.248047	0.248047	0.30281	0.37207	0.431014	0.496094	0.526187	0.596526	0.652819	0.784393	0.967525	1.191	1.38662	1.58827	1.75281	1.9003	2.11931	2.35017	2.66425	2.9745	3.47625	4.26599	19.4455
0	0	0.0516712	0.124023	0.149926	0.203906	0.248047	0.248047	0.30281	0.37207	0.432247	0.496094	0.526187	0.599233	0.652819	0.784393	0.968654	1.19143	1.39019	1.58827	1.75396	1.90445	2.11969	2.35137	2.66752	2.97643	3.49878	4.26756	19.4697
0	0	0.0518605	0.124023	0.150112	0.203906	0.248047	0.248047	0.303343	0.37207	0.43255	0.496094	0.526187	0.600989	0.652819	0.784393	0.968654	1.19249	1.39406	1.58827	1.75396	1.90645	2.12296	2.35255	2.66809	2.97656	3.50791	4.27835	19.5076
0	0	0.0526292	0.124023	0.150341	0.203906	0.248047	0.248047	0.305859	0.37207	0.43255	0.496094	0.527971	0.610636	0.652819	0.784393	0.9747	1.19519	1.39778	1.58827	1.75396	1.9065	2.12512	2.35318	2.67099	2.97708	3.50791	4.28896	20.4334
0	0	0.0536156	0.124023	0.150723	0.203906	0.248047	0.248047	0.305859	0.37207	0.43255	0.496094	0.528777	0.611233	0.653415	0.784393	0.97606	1.19973	1.40123	1.58827	1.75396	1.90698	2.12699	2.35318	2.67155	2.97747	3.50992	4.33905	20.4364
0	0	0.0538115	0.124023	0.153735	0.203906	0.248047	0.248047	0.305859	0.37207	0.43255	0.496094	0.531164	0.611415	0.667636	0.784393	0.976905	1.20247	1.40246	1.58827	1.75396	1.9109	2.12997	2.35712	2.67155	2.97932	3.51925	4.35695	21.084
0	0	0.0538332	0.124023	0.15465	0.203906	0.248047	0.248047	0.305859	0.37207	0.43255	0.496094	0.531164	0.611415	0.667887	0.784393	0.981044	1.20689	1.40317	1.58827	1.75396	1.91501	2.13002	2.36023	2.67155	2.98537	3.52313	4.38375	21.084
0	0	0.0559124	0.124023	0.155987	0.203906	0.248047	0.248047	0.305859	0.37207	0.43255	0.496094	0.532632	0.611719	0.667887	0.784393	0.982076	1.21934	1.40317	1.58827	1.75396	1.91644	2.13378	2.36122	2.67155	2.9862	3.52541	4.41635	21.084
0	0	0.0572103	0.124023	0.155998	0.203906	0.248047	0.248047	0.305859	0.37207	0.440617	0.496094	0.53372	0.611719	0.667887	0.784393	0.983012	1.22344	1.40317	1.58827	1.75396	1.92215	2.13378	2.36356	2.67877	2.98639	3.52541	4.41635	21.084
0	0	0.0583207	0.124023	0.156655	0.203906	0.248047	0.248047	0.305859	0.37207	0.441931	0.496094	0.537762	0.616299	0.667887	0.784393	0.983151	1.22702	1.40762	1.58827	1.75396	1.92268	2.13378	2.36662	2.68181	2.98688	3.52541	4.46484	21.3378
0	0	0.0590806	0.124023	0.157341	0.203906	0.248047	0.248047	0.305859	0.37207	0.442344	0.496094	0.537762	0.616933	0.670704	0.784393	0.992188	1.22768	1.4098	1.58827	1.75396	1.92711	2.13378	2.36908	2.68304	2.99637	3.52726	4.46484	21.4772
0	0	0.0605829	0.124023	0.157997	0.203906	0.248047	0.248047	0.305859	0.37207	0.442549	0.496094	0.538736	0.620117	0.673698	0.784393	0.992188	1.23313	1.41083	1.58827	1.75396	1.92827	2.13378	2.37416	2.68409	2.99716	3.54835	4.47173	21.5815
0	0	0.0616348	0.124023	0.158416	0.203906	0.248047	0.248047	0.306408	0.37207	0.446524	0.496094	0.540638	0.620117	0.676139	0.784393	0.992188	1.2337	1.41213	1.58827	1.75396	1.92935	2.13378	2.37545	2.68466	2.99867	3.55149	4.47173	21.8464
0	0	0.061711	0.124023	0.158897	0.204659	0.248047	0.248047	0.30686	0.37207	0.447173	0.496094	0.54365	0.620117	0.677104	0.784393	0.992188	1.2381	1.41224	1.58827	1.75396	1.93209	2.13378	2.38345	2.68876	2.9993	3.55149	4.55354	22.7081
0	0	0.0622297	0.124023	0.159624	0.209707	0.248047	0.248047	0.308027	0.37207	0.447173	0.496094	0.547584	0.620117	0.679997	0.784393	0.992188	1.24023	1.41361	1.58827	1.75396	1.9359	2.13378	2.39107	2.68914	3.00575	3.58181	4.56178	23.5958
0	0	0.0634729	0.124023	0.161842	0.21007	0.248047	0.248047	0.320775	0.37207	0.447173	0.496094	0.549034	0.620117	0.683922	0.787262	0.992188	1.24023	1.41501	1.58827	1.75396	1.93596	2.13615	2.4012	2.69694	3.00767	3.60915	4.61394	23.6946
0	0	0.0645786	0.124023	0.162555	0.21041	0.248047	0.248047	0.322404	0.372642	0.447173	0.496094	0.549034	0.620117	0.683922	0.792307	0.997641	1.24023	1.41824	1.58827	1.75396	1.93619	2.13863	2.40233	2.70309	3.00833	3.6201	4.62626	24.3099
0	0	0.0661129	0.124023	0.165561	0.213076	0.248047	0.248047	0.322404	0.37559	0.447173	0.496094	0.549034	0.620117	0.683922	0.794137	0.999086	1.24023	1.41948	1.58827	1.75396	1.9363	2.13995	2.4091	2.7039	3.01264	3.62051	4.6339	24.5178
0	0	0.0662673	0.124023	0.165822	0.214053	0.248047	0.248047	0.322404	0.37559	0.447173	0.496094	0.549034	0.620117	0.688461	0.799074	0.999909	1.24023	1.4268	1.58827	1.75396	1.93649	2.14022	2.41059	2.71304	3.01335	3.62739	4.6339	24.7712
0	0	0.0665558	0.124023	0.167841	0.218522	0.248047	0.248047	0.322404	0.37559	0.447173	0.496094	0.549034	0.620117	0.692553	0.799493	0.999909	1.24023	1.42861	1.58827	1.75396	1.93731	2.14764	2.4124	2.71417	3.01675	3.62869	4.66996	24.8047
0	0	0.0669563	0.124023	0.167969	0.219218	0.248047	0.248047	0.322404	0.37559	0.447173	0.496094	0.549034	0.620117	0.692553	0.800161	1.00102	1.24023	1.42917	1.58827	1.75396	1.93731	2.15178	2.4159	2.71792	3.01762	3.63177	4.68023	24.8096
0	0	0.0670668	0.124023	0.167969	0.222824	0.248047	0.248047	0.322404	0.37559	0.447173	0.496094	0.549034	0.620117	0.700691	0.802199	1.00248	1.24023	1.42964	1.58827	1.75396	1.93731	2.15569	2.41807	2.72149	3.01821	3.63935	4.68515	25.8267
0	0	0.0674808	0.124023	0.167969	0.222888	0.248047	0.248047	0.322404	0.37559	0.451133	0.496094	0.552606	0.620139	0.701583	0.802555	1.00421	1.24023	1.43029	1.58827	1.75396	1.93731	2.15808	2.42066	2.72852	3.0278	3.64279	4.71289	26.5514
0	0	0.0676951	0.124023	0.167969	0.223382	0.248047	0.248047	0.322597	0.37559	0.45227	0.496094	0.553823	0.620157	0.701583	0.805364	1.00732	1.24023	1.43052	1.58827	1.75396	1.93731	2.1612	2.42192	2.73977	3.0278	3.64292	4.71289	27.0132
0	0	0.0678863	0.124023	0.167969	0.22436	0.248047	0.248047	0.322643	0.375728	0.45227	0.496094	0.55465	0.620157	0.701583	0.813924	1.01389	1.24023	1.43116	1.58827	1.75396	1.93731	2.17096	2.42514	2.73977	3.02806	3.65584	4.71289	27.6091
0	0	0.0683379	0.124023	0.167969	0.227177	0.248047	0.248047	0.322721	0.376707	0.45227	0.496094	0.55465	0.620157	0.701583	0.814943	1.01431	1.24023	1.43256	1.58827	1.75396	1.93731	2.1719	2.43005	2.73977	3.0313	3.66131	4.71941	27.6091
0	0	0.0685537	0.124023	0.167969	0.227974	0.248047	0.248047	0.323405	0.376725	0.45227	0.496094	0.55465	0.625811	0.701583	0.815625	1.01867	1.24023	1.43513	1.58827	1.75396	1.93731	2.17606	2.43968	2.74851	3.03686	3.66237	4.71941	27.6592
0	0	0.0720408	0.124023	0.167969	0.227974	0.248047	0.248047	0.329342	0.380701	0.45313	0.496094	0.55465	0.626298	0.701583	0.819492	1.01953	1.24023	1.43551	1.58827	1.75396	1.93731	2.17929	2.44298	2.74932	3.04554	3.66266	4.73893	27.852
0	0	0.0730329	0.124023	0.167969	0.227974	0.248047	0.249555	0.331344	0.383268	0.45557	0.496094	0.55465	0.62796	0.701583	0.820421	1.01953	1.24023	1.43682	1.59322	1.75396	1.93731	2.18231	2.44298	2.74944	3.04783	3.67332	4.73893	28.2142
0	0	0.0737159	0.124023	0.167969	0.227974	0.248047	0.251931	0.332746	0.385301	0.455948	0.501214	0.55465	0.627979	0.701583	0.821972	1.01953	1.24023	1.44372	1.59396	1.75396	1.94528	2.18397	2.44756	2.74958	3.05061	3.68356	4.76482	29.9316
0	0	0.0739766	0.124023	0.167969	0.227974	0.248047	0.251953	0.334929	0.386817	0.455948	0.501641	0.55465	0.63102	0.701583	0.821972	1.02171	1.24023	1.44635	1.59572	1.75396	1.96267	2.18534	2.45032	2.75016	3.05617	3.68748	4.77128	32.8819
0	0	0.0747286	0.124023	0.168858	0.227974	0.248047	0.251953	0.335822	0.38853	0.455948	0.501879	0.55465	0.632075	0.704544	0.821972	1.02272	1.24023	1.44635	1.59715	1.75396	1.96676	2.19302	2.45246	2.75052	3.0604	3.68748	4.77128	32.9818
0	0	0.0750121	0.124023	0.168887	0.227974	0.248047	0.251953	0.335938	0.391292	0.455948	0.503906	0.55465	0.632398	0.70554	0.821972	1.02272	1.24023	1.44635	1.60521	1.75396	1.97078	2.19454	2.45979	2.75228	3.06041	3.68748	4.77128	32.9818
0	0	0.0757056	0.124023	0.168898	0.227974	0.248047	0.251953	0.335938	0.391746	0.458273	0.503906	0.55465	0.632398	0.70698	0.822025	1.02272	1.24023	1.44635	1.60705	1.75396	1.97272	2.19518	2.4621	2.75724	3.06466	3.68748	4.77128	34.2314
0	0	0.076134	0.124023	0.168994	0.227974	0.248047	0.251953	0.335938	0.392197	0.462471	0.504337	0.55465	0.632398	0.713672	0.824006	1.02272	1.24443	1.44635	1.60929	1.75396	1.9741	2.2001	2.47628	2.76348	3.06505	3.68748	4.78863	35.2724
0	0	0.0762459	0.124023	0.169717	0.229165	0.248047	0.251953	0.335938	0.392197	0.466493	0.504903	0.55465	0.632398	0.717563	0.825909	1.02272	1.2445	1.44635	1.61202	1.75396	1.97592	2.20034	2.48047	2.76355	3.06817	3.68748	4.8098	38.0281
0	0	0.0769598	0.124023	0.170184	0.231429	0.248047	0.251953	0.335938	0.392197	0.466903	0.506166	0.55465	0.632398	0.720647	0.82715	1.02272	1.24642	1.44635	1.61413	1.75396	1.98374	2.20256	2.48047	2.76496	3.07682	3.70092	4.8162	44.7977
0	0	0.0771972	0.124023	0.171568	0.232615	0.248047	0.251953	0.336112	0.392197	0.468642	0.507549	0.55465	0.632398	0.720917	0.830039	1.02272	1.24642	1.44635	1.6178	1.75396	1.98438	2.20359	2.48047	2.76762	3.08827	3.70404	4.82128	47.0806
0	0	0.0772885	0.124023	0.172646	0.235627	0.248047	0.251953	0.337467	0.392197	0.4706	0.509766	0.55476	0.632398	0.720917	0.831403	1.02272	1.24852	1.44635	1.62082	1.76144	1.98438	2.20992	2.48047	2.77103	3.09336	3.71591	4.83277	47.1224
0	0	0.0776352	0.124023	0.172944	0.236049	0.248047	0.260271	0.339923	0.392197	0.472794	0.509766	0.562654	0.632398	0.720917	0.831975	1.02272	1.25088	1.44635	1.62132	1.76219	1.98438	2.21299	2.48047	2.77325	3.09393	3.7207	4.85532	47.1609
0	0	0.0778347	0.124023	0.175396	0.237396	0.248047	0.260705	0.342278	0.392197	0.473457	0.509766	0.563384	0.636633	0.72116	0.831975	1.02272	1.25492	1.44635	1.6214	1.76405	1.98438	2.21574	2.48047	2.77325	3.10008	3.7207	4.86232	51.6319
0	0	0.0779525	0.124023	0.175396	0.237544	0.248047	0.263687	0.343667	0.392197	0.475087	0.509766	0.563384	0.639606	0.721718	0.832913	1.02272	1.25654	1.44635	1.62153	1.76548	1.98438	2.21719	2.48047	2.77325	3.10061	3.7207	4.87699	54.5844
0	0	0.0787752	0.124023	0.175396	0.237544	0.248047	0.265582	0.346276	0.392197	0.475087	0.509766	0.566829	0.647342	0.723175	0.839844	1.02272	1.25784	1.44635	1.62435	1.7699	1.98438	2.2186	2.48047	2.77325	3.10651	3.72583	4.96094	55.1446
0	0	0.079959	0.124023	0.175396	0.237544	0.248047	0.265582	0.346276	0.392197	0.475087	0.509766	0.568859	0.65205	0.723175	0.839844	1.02292	1.25888	1.44635	1.6281	1.77013	1.99179	2.2186	2.48047	2.77325	3.10725	3.73818	4.96094	55.5143
0	0	0.0800684	0.124023	0.175396	0.240243	0.248047	0.265582	0.346276	0.392197	0.475157	0.509766	0.568873	0.652111	0.72467	0.839844	1.02462	1.26144	1.44635	1.62819	1.77114	1.99303	2.21868	2.48047	2.77325	3.10802	3.75041	4.96094	55.5714
0	0	0.0809494	0.124023	0.175396	0.240497	0.248047	0.265582	0.346276	0.392197	0.477261	0.509766	0.57348	0.652274	0.726181	0.841098	1.02462	1.26292	1.44635	1.62872	1.77227	1.99978	2.21928	2.48047	2.77325	3.10802	3.75363	4.9646	56.9299
0	0	0.0817581	0.124023	0.175396	0.243472	0.248047	0.265582	0.346276	0.392197	0.477274	0.509766	0.57548	0.652819	0.731111	0.845411	1.02516	1.2648	1.44635	1.63015	1.77543	1.99982	2.22419	2.48047	2.77325	3.1137	3.75363	4.96713	57.8806
0	0	0.0817902	0.124023	0.175396	0.244185	0.248047	0.265582	0.346276	0.392197	0.481888	0.509766	0.576734	0.652819	0.735194	0.848787	1.02516	1.2648	1.45166	1.63021	1.77796	1.99982	2.23017	2.48047	2.77325	3.11464	3.7549	4.96713	59.6386
0	0	0.0821438	0.124023	0.175396	0.246568	0.248047	0.265854	0.348744	0.393873	0.486125	0.510137	0.576734	0.652819	0.735194	0.849644	1.02582	1.2648	1.45221	1.63035	1.77811	1.99982	2.23242	2.48047	2.77325	3.11987	3.76132	4.96927	59.9473
0	0	0.0822321	0.124023	0.175396	0.246688	0.248047	0.26769	0.348776	0.394951	0.487089	0.510527	0.576734	0.652819	0.735194	0.855569	1.02677	1.2648	1.45274	1.63367	1.77914	1.99982	2.23242	2.48047	2.77325	3.12008	3.76816	4.98568	64.9002
0	0	0.0839844	0.124023	0.175396	0.246751	0.248047	0.272767	0.349317	0.397673	0.489709	0.510857	0.579421	0.653545	0.739007	0.856623	1.02897	1.2648	1.45723	1.63627	1.77963	1.99982	2.23242	2.48593	2.77325	3.1439	3.78257	5.02257
0	0	0.0839844	0.124023	0.175396	0.246793	0.248047	0.274186	0.350791	0.398525	0.489709	0.510857	0.579852	0.659968	0.739518	0.864752	1.03006	1.2648	1.46184	1.63642	1.78261	1.99982	2.23242	2.48754	2.77325	3.16182	3.78618	5.05918
0	0	0.0839844	0.124023	0.175396	0.246961	0.248047	0.277325	0.350791	0.399861	0.489709	0.510857	0.581958	0.661439	0.74223	0.865065	1.03775	1.2648	1.46305	1.63827	1.78357	1.99982	2.23843	2.49088	2.77325	3.16765	3.78627	5.05918
0	0	0.0839844	0.124023	0.175396	0.247452	0.248047	0.277325	0.350791	0.404096	0.489709	0.511362	0.582057	0.661672	0.74223	0.868164	1.03874	1.2648	1.46524	1.6392	1.78529	2.00121	2.23858	2.49284	2.77325	3.17655	3.79088	5.0895
0	0	0.0839844	0.124023	0.175396	0.248047	0.248047	0.277325	0.350791	0.406662	0.489709	0.511362	0.583496	0.663571	0.744141	0.868164	1.03972	1.2648	1.46877	1.6399	1.78732	2.00977	2.24235	2.49284	2.77618	3.17655	3.79439	5.11362
0	0	0.0839844	0.124023	0.175396	0.248047	0.248047	0.277325	0.350791	0.407812	0.489709	0.511362	0.587891	0.667887	0.744141	0.868164	1.03972	1.2648	1.46925	1.6424	1.78869	2.01708	2.24251	2.49324	2.77975	3.17655	3.81989	5.11362
0	0	0.0839844	0.124023	0.175396	0.248047	0.248047	0.277325	0.350791	0.407812	0.489709	0.511362	0.593859	0.667887	0.744141	0.86871	1.0482	1.2648	1.47079	1.64243	1.78869	2.02084	2.24616	2.4975	2.78544	3.17655	3.82045	5.11362
0	0	0.0839844	0.124023	0.175396	0.248047	0.248047	0.277325	0.350791	0.407812	0.493078	0.511362	0.593859	0.667887	0.744141	0.868928	1.04857	1.2648	1.47482	1.64348	1.78869	2.02173	2.24616	2.50229	2.78976	3.17802	3.82944	5.11362
0	0	0.0839844	0.124023	0.175396	0.248047	0.248047	0.277325	0.350791	0.407813	0.494294	0.511362	0.593859	0.667887	0.744141	0.87207	1.05237	1.2648	1.47862	1.64413	1.79713	2.03166	2.24616	2.50523	2.7908	3.17932	3.83102	5.12756
0	0	0.0839844	0.124023	0.175396	0.248047	0.248047	0.277325	0.350791	0.407813	0.496094	0.511362	0.593904	0.667887	0.744141	0.87363	1.05237	1.2648	1.47889	1.64595	1.80006	2.03414	2.24616	2.50654	2.79651	3.1853	3.8356	5.14938
0	0	0.0839844	0.124023	0.175396	0.248047	0.248047	0.277325	0.350791	0.407813	0.496094	0.511362	0.594484	0.667887	0.744141	0.876823	1.05237	1.2648	1.48005	1.64688	1.80496	2.03656	2.24616	2.50865	2.80232	3.18898	3.84149	5.15862
0	0	0.0839844	0.124023	0.175396	0.248047	0.248047	0.277325	0.350791	0.407813	0.496094	0.511362	0.594484	0.667887	0.744141	0.876823	1.05237	1.2648	1.48499	1.65277	1.80581	2.03941	2.24953	2.50898	2.80247	3.19142	3.85072	5.17937
0	0	0.0839844	0.124023	0.175396	0.248047	0.248047	0.277325	0.350791	0.407813	0.496094	0.511362	0.594484	0.671875	0.744141	0.876823	1.05237	1.2648	1.48707	1.65336	1.80581	2.04177	2.25205	2.50968	2.80933	3.1994	3.85072	5.26002
0	0	0.0839844	0.124023	0.175396	0.248047	0.248047	0.277325	0.350791	0.413077	0.496094	0.511362	0.594484	0.671875	0.744141	0.876978	1.05237	1.2648	1.48735	1.6536	1.80581	2.04218	2.25605	2.52112	2.81973	3.20742	3.85072	5.26187
0	0	0.0839844	0.124023	0.175396	0.248047	0.248047	0.277325	0.350791	0.413237	0.496094	0.511362	0.594484	0.674088	0.744141	0.876978	1.05237	1.2648	1.48828	1.65685	1.80935	2.04545	2.25774	2.52351	2.82032	3.20771	3.85293	5.28292
0	0	0.0839844	0.124023	0.175396	0.248047	0.248047	0.277325	0.350791	0.414286	0.496094	0.511362	0.594484	0.674588	0.747672	0.876978	1.05237	1.26643	1.48828	1.65823	1.81686	2.04545	2.25977	2.52421	2.8206	3.21032	3.85371	5.34309
0	0	0.0839844	0.124023	0.175396	0.248047	0.248047	0.277325	0.350791	0.416243	0.496094	0.511362	0.595717	0.675664	0.747846	0.876978	1.05237	1.26982	1.48828	1.6601	1.82878	2.04545	2.26035	2.52433	2.8244	3.22461	3.8587	5.34309
0	0	0.0839844	0.124023	0.175396	0.248047	0.248047	0.277325	0.350791	0.418613	0.496094	0.511974	0.596753	0.676659	0.74797	0.876978	1.05237	1.27289	1.48828	1.66172	1.84418	2.04545	2.26441	2.52959	2.82566	3.22461	3.8587	5.37916
0	0	0.0839844	0.124023	0.17541	0.248047	0.248047	0.277325	0.350791	0.419922	0.496094	0.512076	0.59718	0.677658	0.750242	0.892766	1.05237	1.27645	1.48828	1.66395	1.84618	2.04545	2.27476	2.52959	2.82665	3.22461	3.86414	5.41743
0	0	0.0839844	0.124023	0.175614	0.248047	0.248047	0.277325	0.350791	0.419922	0.496094	0.513308	0.597525	0.678643	0.754405	0.892766	1.0575	1.27665	1.48828	1.66573	1.84821	2.04941	2.27807	2.52959	2.82817	3.22461	3.87308	5.46267
0	0	0.0839844	0.124023	0.175621	0.248047	0.248047	0.277325	0.350791	0.419922	0.496094	0.517115	0.598478	0.684429	0.754405	0.894346	1.05966	1.27921	1.48828	1.67711	1.85226	2.04979	2.27909	2.52959	2.82991	3.23008	3.87462	5.47953
0	0	0.0839844	0.124023	0.175855	0.248047	0.248047	0.277325	0.350791	0.419922	0.496094	0.518844	0.599857	0.692553	0.754405	0.894346	1.05966	1.28009	1.48828	1.67943	1.85271	2.05549	2.27952	2.52959	2.82995	3.2339	3.87462	5.49075
0	0	0.0839844	0.124023	0.179508	0.248047	0.248047	0.277325	0.350791	0.419922	0.496094	0.519861	0.600039	0.692553	0.754405	0.894346	1.05983	1.28368	1.48828	1.68197	1.85884	2.05677	2.2828	2.52959	2.83118	3.23414	3.87759	5.49075
0	0	0.0839844	0.124023	0.180157	0.248047	0.248047	0.277325	0.350791	0.419922	0.496094	0.519861	0.603868	0.692553	0.754405	0.894346	1.06125	1.28471	1.48828	1.68888	1.86264	2.06064	2.28446	2.53217	2.84105	3.23954	3.88255	5.5465
0	0	0.0849183	0.124448	0.180334	0.248047	0.248047	0.277325	0.350791	0.419922	0.496094	0.519861	0.604549	0.697234	0.755859	0.894346	1.06233	1.28927	1.48828	1.69274	1.86424	2.06126	2.28647	2.55375	2.84869	3.23963	3.88505	5.5465
0	0	0.0852047	0.124651	0.181724	0.248047	0.248047	0.277325	0.350791	0.419922	0.496094	0.519861	0.604626	0.699147	0.756024	0.894346	1.06233	1.28994	1.48828	1.69326	1.86591	2.0651	2.28688	2.5538	2.85745	3.24519	3.89264	5.65634
0	0	0.0854248	0.125744	0.181887	0.248047	0.248047	0.277325	0.352443	0.419922	0.496094	0.519861	0.60562	0.701583	0.756847	0.894346	1.06473	1.29028	1.49034	1.69633	1.86924	2.06579	2.2898	2.5538	2.86115	3.25316	3.92138	5.65634
0	0	0.0855702	0.127203	0.182288	0.248047	0.248047	0.277325	0.35297	0.419922	0.496094	0.519861	0.60562	0.701583	0.760511	0.894346	1.06689	1.29463	1.49093	1.70428	1.86991	2.06802	2.29124	2.5538	2.87568	3.25368	3.92197	5.72661
0	0	0.086725	0.128117	0.18262	0.248047	0.248047	0.277325	0.356207	0.420364	0.496094	0.520509	0.60562	0.701583	0.761597	0.894346	1.06689	1.29555	1.49135	1.70473	1.87554	2.07007	2.29336	2.5538	2.87648	3.2573	3.92197	5.72661
0	0	0.0868338	0.128533	0.182914	0.248047	0.248047	0.277325	0.356275	0.420364	0.496094	0.522237	0.60562	0.701583	0.76378	0.894346	1.06689	1.29749	1.49194	1.70609	1.88036	2.07007	2.2966	2.5538	2.87785	3.26255	3.92197	5.76942
0	0	0.0885292	0.128956	0.184205	0.248047	0.248047	0.277325	0.356316	0.420364	0.496094	0.52381	0.60562	0.701583	0.764415	0.894346	1.06689	1.2998	1.49234	1.70801	1.88592	2.07197	2.29779	2.5538	2.88261	3.26865	3.92197	5.81598
0	0	0.0889594	0.12953	0.184832	0.248047	0.248047	0.277325	0.356316	0.420364	0.496094	0.523883	0.60562	0.701583	0.771374	0.894346	1.07056	1.30091	1.49587	1.70856	1.88677	2.07742	2.29913	2.5538	2.88438	3.2846	3.92197	5.83833
0	0	0.0891652	0.129651	0.187795	0.248047	0.248047	0.277325	0.356316	0.420364	0.496094	0.526187	0.60562	0.701583	0.776452	0.896625	1.0727	1.3039	1.50621	1.71145	1.88907	2.08016	2.3151	2.56047	2.89	3.29453	3.92197	5.85678
0	0	0.0898166	0.129717	0.187795	0.248047	0.248047	0.278265	0.356316	0.420364	0.496094	0.526187	0.611415	0.701583	0.776452	0.900914	1.07552	1.30553	1.50642	1.71771	1.88907	2.0814	2.31568	2.56555	2.8927	3.29774	3.93433	5.88033
0	0	0.0899839	0.130337	0.187795	0.248047	0.248047	0.279881	0.356316	0.420364	0.496094	0.530445	0.611415	0.701583	0.777987	0.902145	1.08207	1.31738	1.50746	1.71886	1.88907	2.08195	2.31614	2.56925	2.8927	3.30198	3.94542	5.89601
0	0	0.0911426	0.130574	0.187795	0.248047	0.248047	0.284075	0.356405	0.426633	0.496094	0.531164	0.611719	0.701583	0.780184	0.902904	1.0843	1.31892	1.50808	1.71906	1.89065	2.08258	2.31969	2.57181	2.8927	3.30936	3.95462	5.97376
0	0	0.0917391	0.130801	0.187795	0.248047	0.248047	0.288367	0.356522	0.428238	0.496094	0.531164	0.611719	0.701583	0.782654	0.902904	1.08535	1.32539	1.50881	1.7216	1.89125	2.08552	2.32169	2.57745	2.8927	3.30936	3.96875	5.99432
0	0	0.0923731	0.130802	0.187795	0.248047	0.248047	0.288422	0.358035	0.428238	0.496094	0.531164	0.616234	0.701583	0.784393	0.902904	1.08615	1.32778	1.50881	1.72209	1.89253	2.08866	2.32885	2.57755	2.8927	3.31099	3.96875	6.12631
0	0	0.0931565	0.131586	0.187795	0.248047	0.248047	0.289671	0.359811	0.428238	0.496094	0.531305	0.620117	0.701583	0.784393	0.902904	1.09162	1.32791	1.50881	1.72329	1.89653	2.09141	2.33216	2.57955	2.8927	3.31356	3.98208	6.12631
0	0	0.0935726	0.131887	0.187795	0.248047	0.248047	0.290889	0.36109	0.428238	0.496094	0.532281	0.620117	0.701583	0.784393	0.90814	1.09481	1.32791	1.50881	1.72417	1.89654	2.09397	2.33267	2.58121	2.8927	3.31653	3.98481	6.13634
0	0	0.0938461	0.132076	0.187795	0.248047	0.248047	0.295614	0.362065	0.428238	0.496094	0.532327	0.620117	0.701583	0.784393	0.90843	1.09807	1.32803	1.50881	1.72513	1.89662	2.09639	2.33308	2.58245	2.89646	3.31761	3.98577	6.20613
0	0	0.0938562	0.132606	0.187795	0.248047	0.248047	0.300724	0.36517	0.428238	0.496094	0.537762	0.620117	0.701583	0.784393	0.911883	1.10279	1.33379	1.50881	1.72704	1.89809	2.09666	2.33323	2.5858	2.89792	3.32279	3.98942	6.22098
0	0	0.0942689	0.132744	0.187795	0.248047	0.248047	0.301106	0.367084	0.428238	0.496094	0.537762	0.620117	0.701583	0.784393	0.914443	1.10509	1.33524	1.50881	1.72948	1.90111	2.1003	2.34007	2.5863	2.89962	3.32303	3.99134	6.22098
0	0	0.0946312	0.134268	0.187795	0.248047	0.248047	0.301305	0.367597	0.429046	0.497985	0.537762	0.620117	0.701583	0.784393	0.91579	1.10666	1.33577	1.50881	1.73596	1.90113	2.10145	2.34007	2.58635	2.90331	3.3269	3.99964	6.24566
0	0	0.0961837	0.135013	0.187795	0.248047	0.248047	0.30281	0.367597	0.43255	0.498853	0.537762	0.620117	0.711327	0.784393	0.923225	1.1093	1.33577	1.50881	1.73633	1.90357	2.10284	2.34007	2.58681	2.90391	3.3279	3.99964	6.26042
0	0	0.0973217	0.135124	0.187795	0.248047	0.248047	0.30281	0.367597	0.43255	0.499703	0.537858	0.620117	0.712631	0.784393	0.92336	1.1093	1.33577	1.50881	1.73633	1.90815	2.10433	2.34007	2.58969	2.90803	3.3279	3.99964	6.27514
0	0	0.0975189	0.136328	0.187795	0.248047	0.248047	0.30281	0.367597	0.435676	0.500685	0.539064	0.620117	0.712631	0.784393	0.925163	1.1093	1.33577	1.50888	1.73633	1.91203	2.10462	2.34007	2.58969	2.91365	3.32958	4.02207	6.31082
0	0	0.0981275	0.137768	0.187795	0.248047	0.248047	0.30281	0.367597	0.436366	0.501235	0.540643	0.620117	0.712678	0.784393	0.927026	1.1093	1.33577	1.51236	1.73633	1.91287	2.10475	2.34007	2.58969	2.92178	3.37129	4.02595	6.51094
0	0	0.0992536	0.138607	0.187795	0.248047	0.248047	0.30281	0.367597	0.439494	0.502188	0.541294	0.620117	0.713672	0.784393	0.930095	1.1093	1.33577	1.51346	1.73633	1.91381	2.10475	2.34007	2.58969	2.92256	3.3738	4.0301	6.54863
0	0	0.099874	0.13953	0.187795	0.248047	0.248047	0.30281	0.367597	0.439582	0.502641	0.54674	0.620117	0.713672	0.784393	0.931573	1.1093	1.33577	1.51364	1.73656	1.91414	2.10613	2.34007	2.58969	2.92313	3.3738	4.03113	6.66503
0	0	0.100336	0.141214	0.187795	0.248047	0.248047	0.30281	0.367597	0.442034	0.503119	0.547798	0.620117	0.715309	0.784393	0.933617	1.1093	1.33577	1.51706	1.73821	1.91422	2.10716	2.34007	2.58969	2.92733	3.3738	4.03482	6.67887
0	0	0.100407	0.14307	0.187795	0.248047	0.248047	0.30281	0.367597	0.443437	0.503482	0.549034	0.620117	0.715801	0.784393	0.937784	1.1093	1.33577	1.51748	1.73887	1.91439	2.10988	2.34007	2.58969	2.93355	3.3787	4.03503	6.67887
0	0	0.100514	0.143214	0.187795	0.248047	0.248047	0.30281	0.367597	0.446349	0.503906	0.549034	0.620117	0.720589	0.784393	0.938974	1.1093	1.33577	1.51862	1.73968	1.91444	2.11093	2.34007	2.59092	2.93729	3.37967	4.03692	6.67887
0	0	0.101198	0.143436	0.188268	0.248047	0.248047	0.302843	0.367597	0.447173	0.503906	0.549034	0.620117	0.720917	0.784393	0.944534	1.10963	1.33577	1.51882	1.74049	1.92009	2.11289	2.34007	2.59583	2.94056	3.40307	4.03791	6.67887
0	0	0.101213	0.144183	0.188336	0.248047	0.248047	0.305859	0.370641	0.447173	0.503906	0.549034	0.620117	0.720917	0.784393	0.956106	1.11046	1.33577	1.52095	1.7429	1.92604	2.11754	2.34007	2.59605	2.94227	3.40906	4.0392	6.77036
0	0	0.101303	0.144183	0.189824	0.248047	0.248047	0.305859	0.37207	0.447173	0.508349	0.549034	0.620157	0.720917	0.784393	0.956549	1.11464	1.33577	1.5218	1.74559	1.93347	2.11931	2.34007	2.60255	2.9492	3.43172	4.06626	6.81113
0	0	0.101512	0.144183	0.19064	0.248047	0.248047	0.305859	0.37207	0.447173	0.509766	0.549034	0.620157	0.720917	0.784393	0.957569	1.11818	1.33577	1.52237	1.74719	1.93693	2.11931	2.34132	2.60391	2.95009	3.44311	4.06827	6.89195
0	0	0.101515	0.144183	0.191122	0.248047	0.248047	0.305859	0.37207	0.447173	0.509766	0.549034	0.620157	0.720917	0.784393	0.958339	1.12611	1.33577	1.52411	1.74762	1.93731	2.12296	2.34285	2.6054	2.95714	3.4465	4.06827	6.90979
0	0	0.101953	0.144183	0.191246	0.248047	0.248047	0.305859	0.37207	0.447173	0.509766	0.549034	0.623601	0.720917	0.788271	0.95943	1.12793	1.33577	1.5248	1.74943	1.93731	2.12627	2.34383	2.60542	2.95964	3.45131	4.06827	6.94974
0	0	0.101953	0.144183	0.19182	0.248047	0.248047	0.305859	0.37207	0.447173	0.509766	0.549367	0.626673	0.720917	0.788328	0.961824	1.12989	1.33577	1.53122	1.75241	1.93731	2.1272	2.35318	2.60642	2.96555	3.45489	4.08246	7.00266
0	0	0.101953	0.144183	0.192876	0.248047	0.248047	0.305859	0.37207	0.447173	0.509766	0.549803	0.627764	0.722461	0.792307	0.961824	1.12999	1.33577	1.53276	1.75396	1.93731	2.12918	2.35318	2.60678	2.96638	3.45489	4.10591	7.21045
0	0	0.101953	0.144183	0.19362	0.248047	0.248047	0.305859	0.37207	0.447173	0.509766	0.55465	0.628815	0.722461	0.792307	0.966925	1.13113	1.3371	1.53994	1.75396	1.93731	2.12988	2.35562	2.60715	2.97357	3.46895	4.10591	7.21045
0	0	0.101953	0.144183	0.19383	0.248047	0.248047	0.305859	0.37207	0.447173	0.509766	0.55465	0.629637	0.723175	0.792307	0.967145	1.13167	1.33803	1.54099	1.75396	1.93731	2.13019	2.3558	2.61137	2.97656	3.47266	4.14857	7.37496
0	0	0.101953	0.144183	0.194114	0.248047	0.248047	0.306796	0.37207	0.447173	0.509766	0.55465	0.632398	0.723175	0.794137	0.967212	1.13362	1.34031	1.5412	1.75396	1.93731	2.13152	2.35927	2.61179	2.97656	3.47266	4.15095	7.54405
0	0	0.101953	0.144183	0.194679	0.248047	0.248047	0.311285	0.37207	0.447173	0.509766	0.55465	0.632398	0.723175	0.794137	0.968654	1.13936	1.34152	1.5423	1.75396	1.93731	2.1335	2.3638	2.61578	2.97656	3.4737	4.15802	7.60902
0	0	0.101953	0.144183	0.197591	0.248047	0.248047	0.311829	0.37207	0.447173	0.509766	0.55465	0.632398	0.723175	0.794137	0.968654	1.14231	1.34213	1.54254	1.75396	1.93731	2.13378	2.36559	2.61705	2.97656	3.4815	4.15802	7.69345
0	0	0.101953	0.144183	0.199677	0.248047	0.248047	0.312021	0.37207	0.447173	0.509766	0.55465	0.632398	0.723175	0.794137	0.973426	1.14344	1.34215	1.54374	1.75396	1.93731	2.13378	2.37182	2.62267	2.97656	3.4959	4.15802	7.83216
0	0	0.101953	0.144183	0.199835	0.248047	0.248047	0.312449	0.37207	0.447527	0.510857	0.55465	0.632398	0.723175	0.794137	0.974129	1.14364	1.34366	1.54502	1.75396	1.93731	2.13378	2.37513	2.62489	2.97656	3.50791	4.15802	7.88305
0	0	0.101953	0.144563	0.200814	0.248047	0.248047	0.31301	0.37207	0.45227	0.510857	0.55465	0.632398	0.723896	0.794137	0.976292	1.1445	1.34792	1.54732	1.75396	1.93731	2.13378	2.3761	2.62625	2.97747	3.50791	4.15802	7.98773
0	0	0.101953	0.144766	0.202728	0.248047	0.248047	0.313676	0.37207	0.45227	0.510857	0.55465	0.632398	0.727105	0.795432	0.977469	1.1561	1.34959	1.54777	1.75396	1.93731	2.13378	2.38039	2.63049	2.98183	3.50791	4.15802	8.00696
0	0	0.101953	0.145375	0.203085	0.248047	0.248047	0.313986	0.37207	0.45227	0.511362	0.55465	0.632398	0.728611	0.796279	0.979319	1.15695	1.35061	1.55322	1.75396	1.93731	2.13378	2.38819	2.63257	2.98283	3.50791	4.21166	8.07963
0	0	0.101953	0.145701	0.203767	0.248047	0.248047	0.314431	0.37207	0.45227	0.511362	0.55465	0.632398	0.729291	0.802058	0.980189	1.16171	1.35189	1.55412	1.75396	1.94774	2.13473	2.38824	2.63677	2.98537	3.50791	4.2168	8.12519
0	0	0.101953	0.146378	0.203906	0.248047	0.248047	0.315236	0.37207	0.45227	0.511362	0.55465	0.632398	0.729794	0.806794	0.984024	1.16244	1.35328	1.55755	1.75396	1.94927	2.1376	2.39165	2.65244	2.98611	3.50791	4.2168	8.18179
0	0	0.101953	0.147482	0.203906	0.248047	0.248047	0.316324	0.37207	0.453075	0.511362	0.55465	0.632398	0.730641	0.815625	0.984498	1.16674	1.35421	1.55892	1.75396	1.95068	2.14068	2.39652	2.65264	2.98773	3.50791	4.2168	8.18179
0	0	0.101953	0.148006	0.203906	0.248047	0.248047	0.318917	0.37207	0.455948	0.511362	0.55465	0.632398	0.731733	0.817545	0.984855	1.16977	1.35633	1.55958	1.75396	1.95091	2.14211	2.39705	2.66127	2.98842	3.51138	4.2168	8.24546
0	0.000695094	0.101953	0.148424	0.203906	0.248047	0.248047	0.322404	0.37207	0.455948	0.511362	0.55465	0.632398	0.733387	0.819461	0.986309	1.17003	1.35718	1.55973	1.75396	1.9524	2.14216	2.3987	2.66162	2.99668	3.51272	4.2168	8.27897
0	0.00851076	0.101953	0.148737	0.203906	0.248047	0.248047	0.322404	0.374541	0.455948	0.511362	0.55465	0.632398	0.734759	0.819634	0.987762	1.17003	1.36426	1.5609	1.75396	1.95463	2.14389	2.40152	2.66481	2.99674	3.51595	4.22409	8.31605
0	0.0100727	0.101953	0.148974	0.203906	0.248047	0.248047	0.322404	0.37559	0.455948	0.511362	0.55465	0.632398	0.735194	0.820482	0.988039	1.17392	1.36988	1.56318	1.75396	1.95588	2.14548	2.40348	2.66511	2.99716	3.52027	4.24588	8.43724
0	0.0137554	0.101953	0.149654	0.203906	0.248047	0.251126	0.322404	0.37559	0.455948	0.511362	0.55465	0.634139	0.73551	0.821697	0.988411	1.17527	1.37405	1.56371	1.75396	1.95717	2.15465	2.40434	2.66668	2.99716	3.52209	4.24588	8.48451
0	0.015085	0.101953	0.150196	0.203906	0.248047	0.251953	0.322404	0.375593	0.455948	0.511362	0.55465	0.636998	0.739009	0.821972	0.988665	1.17659	1.37488	1.56498	1.75396	1.96248	2.15491	2.40455	2.66732	2.99716	3.52541	4.25019	8.59975
0	0.0167298	0.101953	0.150892	0.203906	0.248047	0.251953	0.322404	0.376789	0.455948	0.511362	0.55465	0.637472	0.741878	0.822155	0.992188	1.17659	1.3772	1.56838	1.75396	1.96591	2.15503	2.40952	2.67133	2.99716	3.52541	4.26756	8.7978
0	0.016817	0.101953	0.152998	0.203906	0.248047	0.251953	0.322404	0.377415	0.455948	0.512192	0.55465	0.638761	0.74223	0.825259	0.992188	1.17983	1.37743	1.56849	1.75396	1.96593	2.15876	2.40999	2.67155	2.99716	3.52541	4.26756	8.90554
0	0.0174891	0.101953	0.15314	0.203906	0.248047	0.251953	0.322404	0.377454	0.455948	0.517943	0.55465	0.639792	0.74223	0.827314	0.992188	1.18897	1.38133	1.56879	1.75396	1.96621	2.16247	2.41105	2.67155	3.00228	3.53613	4.26756	8.96064
0	0.0176153	0.101953	0.153278	0.203906	0.248047	0.251953	0.322404	0.381258	0.456471	0.518392	0.558239	0.642076	0.74223	0.831975	0.992188	1.18953	1.38522	1.56879	1.75396	1.96765	2.16434	2.41263	2.67155	3.00343	3.53873	4.26756	8.96407
0	0.0186551	0.101953	0.153374	0.203906	0.248047	0.251953	0.322404	0.383353	0.461899	0.519861	0.559865	0.643462	0.744141	0.831975	0.992188	1.19329	1.38649	1.56879	1.75396	1.96814	2.16716	2.41298	2.67155	3.00767	3.54791	4.26756	9.20451
0	0.0232245	0.101953	0.154539	0.203906	0.248047	0.251953	0.322404	0.38416	0.464821	0.519861	0.562604	0.644808	0.744141	0.831975	0.992188	1.19364	1.38657	1.56879	1.75396	1.96853	2.16774	2.41633	2.67377	3.00777	3.55149	4.26756	9.6324
0	0.0253694	0.101953	0.154539	0.203906	0.248047	0.251953	0.322404	0.387647	0.464977	0.519861	0.563384	0.644808	0.744141	0.832956	0.993924	1.19373	1.38662	1.56879	1.75396	1.96896	2.17096	2.41822	2.67614	3.00913	3.56698	4.28102	9.67701
0	0.0254229	0.101953	0.155193	0.203906	0.248047	0.251953	0.322404	0.39129	0.466629	0.519861	0.563384	0.649794	0.744141	0.833144	0.994746	1.19655	1.38662	1.56879	1.75396	1.96933	2.17125	2.43196	2.67862	3.01762	3.56817	4.28432	9.75301
0	0.0280035	0.10266	0.156729	0.203906	0.248047	0.255251	0.322404	0.391449	0.467922	0.519861	0.563384	0.651282	0.744141	0.83413	0.995159	1.20099	1.38671	1.57082	1.75396	1.97239	2.17231	2.43217	2.68274	3.01762	3.57738	4.28977	9.97753
0	0.0282382	0.103147	0.157424	0.203906	0.248047	0.255267	0.323087	0.392197	0.470201	0.519861	0.563384	0.652037	0.744141	0.839029	0.997492	1.20577	1.38812	1.57165	1.75396	1.97244	2.17283	2.43287	2.68304	3.01821	3.58778	4.31326	9.99909
0	0.0284038	0.103581	0.157881	0.203906	0.248047	0.256004	0.324752	0.392197	0.472399	0.519861	0.563384	0.652819	0.744141	0.839844	0.997518	1.20625	1.38911	1.57256	1.75396	1.97472	2.17641	2.43372	2.68304	3.01855	3.58811	4.33195	9.99909
0	0.0294126	0.104829	0.158356	0.203906	0.248047	0.256802	0.324841	0.392197	0.473325	0.521318	0.563695	0.652819	0.744141	0.839844	0.998502	1.20697	1.39019	1.57805	1.75396	1.97562	2.17888	2.43836	2.68304	3.02395	3.58987	4.33905	10.0451
0	0.0295632	0.107371	0.158656	0.203906	0.248047	0.258434	0.3262	0.392197	0.47427	0.522451	0.571966	0.652819	0.744141	0.839844	0.999083	1.20823	1.39195	1.58004	1.75396	1.97631	2.18334	2.43996	2.68808	3.0278	3.59111	4.37671	10.0727
0	0.030262	0.107393	0.158928	0.203906	0.248047	0.259474	0.326239	0.392197	0.475087	0.525606	0.575495	0.652819	0.744141	0.840727	0.999909	1.20902	1.39573	1.58274	1.75396	1.97682	2.1835	2.44298	2.6916	3.0278	3.59152	4.39376	10.1214
0	0.0304292	0.108106	0.161383	0.204159	0.248047	0.260299	0.328246	0.392197	0.475087	0.525743	0.576658	0.652819	0.744141	0.842567	0.999909	1.21063	1.39778	1.58751	1.75396	1.97709	2.18771	2.44298	2.69219	3.0278	3.59416	4.3954	10.1971
0	0.0309582	0.108301	0.162659	0.204221	0.248047	0.261054	0.330145	0.392197	0.475087	0.526187	0.576734	0.652819	0.744141	0.844695	0.999909	1.21678	1.4004	1.58827	1.75396	1.97849	2.18773	2.44298	2.69449	3.0278	3.60463	4.41635	10.2543
0	0.0312628	0.108389	0.163568	0.204236	0.248047	0.261078	0.332125	0.392197	0.475087	0.526187	0.576734	0.652819	0.744141	0.84835	0.999909	1.21705	1.40288	1.58827	1.75396	1.98166	2.18884	2.44347	2.69528	3.0278	3.60681	4.41635	10.4209
0	0.0316094	0.108529	0.163589	0.205186	0.248047	0.26205	0.333129	0.392197	0.475348	0.526187	0.576734	0.652819	0.744141	0.850417	1.00266	1.21999	1.40317	1.58827	1.75396	1.98438	2.19518	2.44723	2.69595	3.0278	3.6091	4.44313	10.4915
0	0.0338077	0.108538	0.1642	0.206027	0.248047	0.263459	0.334556	0.392197	0.476923	0.526187	0.576734	0.652819	0.744141	0.854368	1.00412	1.22018	1.40317	1.58827	1.75396	1.98438	2.1955	2.44915	2.70613	3.0278	3.61693	4.46484	10.666
0	0.034199	0.108952	0.164623	0.209035	0.248047	0.265582	0.335937	0.392197	0.479574	0.526187	0.576734	0.652819	0.744141	0.854478	1.00413	1.22283	1.40317	1.58827	1.75396	1.98438	2.2028	2.45141	2.7098	3.0278	3.62449	4.46484	10.6689
0	0.0349088	0.109068	0.165573	0.209885	0.248047	0.265582	0.335938	0.393878	0.480419	0.526187	0.576734	0.654872	0.744555	0.859368	1.00779	1.22768	1.40317	1.58827	1.75396	1.98438	2.20281	2.45554	2.70992	3.0278	3.62584	4.46484	10.8971
0	0.0350111	0.10931	0.16571	0.210797	0.248047	0.265582	0.335938	0.394386	0.480766	0.526187	0.577638	0.655494	0.747031	0.861082	1.00877	1.22975	1.40317	1.58827	1.75396	1.98438	2.20408	2.4579	2.71329	3.02878	3.62595	4.47173	10.9253
0	0.0359266	0.109543	0.165804	0.211739	0.248047	0.265582	0.335938	0.395173	0.481358	0.526445	0.577709	0.655939	0.747343	0.861499	1.00928	1.23023	1.40317	1.58827	1.75493	1.98438	2.20557	2.45959	2.71427	3.03491	3.63218	4.47173	10.9591
0	0.0368602	0.11016	0.16602	0.21237	0.248047	0.265582	0.335962	0.399718	0.484317	0.526676	0.579206	0.655939	0.750081	0.864863	1.01072	1.23591	1.40317	1.58827	1.75554	1.98438	2.20853	2.46241	2.71493	3.03686	3.64076	4.47173	11.0095
0	0.0374945	0.110653	0.166193	0.21262	0.248047	0.265582	0.336151	0.39978	0.485246	0.528357	0.581276	0.655939	0.754405	0.865101	1.01121	1.23942	1.40578	1.58827	1.75683	1.98659	2.20864	2.46293	2.72206	3.03943	3.66237	4.47173	11.0847
0	0.0387624	0.111116	0.166761	0.212876	0.248047	0.265582	0.336913	0.403529	0.489122	0.528359	0.584162	0.655939	0.754405	0.866227	1.01131	1.24023	1.40783	1.58827	1.75942	1.99008	2.20992	2.4687	2.72347	3.0503	3.66237	4.47173	11.093
0	0.0389394	0.112168	0.166837	0.213282	0.248047	0.265582	0.336981	0.4042	0.489709	0.528819	0.584252	0.656334	0.754405	0.868164	1.01373	1.24023	1.40953	1.58827	1.76207	1.99058	2.21066	2.47636	2.72446	3.05048	3.67058	4.47833	11.1069
0	0.0393719	0.112297	0.167815	0.213974	0.248047	0.26896	0.338608	0.405438	0.489709	0.531021	0.584365	0.65774	0.754405	0.868164	1.0139	1.24023	1.41016	1.58827	1.763	1.99128	2.21339	2.47711	2.72608	3.05647	3.67129	4.52093	11.1621
0	0.0401958	0.112526	0.167969	0.214024	0.248047	0.270258	0.34008	0.407812	0.489709	0.531164	0.587891	0.662267	0.755859	0.868689	1.01953	1.24023	1.41189	1.58827	1.76327	1.99182	2.21509	2.47811	2.72852	3.0604	3.68748	4.52643	11.1621
0	0.0402396	0.112967	0.167969	0.214772	0.248047	0.270948	0.341873	0.407812	0.489709	0.531164	0.587891	0.662953	0.756377	0.869041	1.02115	1.24023	1.41207	1.58827	1.76467	1.99362	2.21643	2.47913	2.72902	3.06812	3.68748	4.55715	11.1621
0	0.0416191	0.113413	0.167969	0.215208	0.248047	0.271024	0.343938	0.407812	0.489709	0.531164	0.587891	0.667369	0.756581	0.870549	1.02167	1.24023	1.41408	1.58827	1.76555	1.99864	2.21656	2.48047	2.72992	3.06817	3.68748	4.57376	11.1731
0	0.0427091	0.114126	0.167969	0.215711	0.248047	0.271527	0.345216	0.407812	0.489709	0.531164	0.589064	0.667887	0.757104	0.871088	1.02171	1.24023	1.42194	1.58827	1.76731	1.99905	2.21704	2.48047	2.73821	3.06817	3.68748	4.59888	11.3154
0	0.0433864	0.11525	0.167969	0.217165	0.248047	0.272397	0.345971	0.407812	0.489709	0.532328	0.591695	0.667887	0.757291	0.872239	1.02272	1.24023	1.42202	1.58827	1.76819	1.99957	2.2186	2.48047	2.73977	3.0697	3.68748	4.61394	11.4129
0	0.0434905	0.115972	0.167969	0.217335	0.248047	0.273118	0.346276	0.407813	0.489709	0.532414	0.593859	0.667887	0.760317	0.876823	1.02272	1.24023	1.42734	1.58827	1.77081	1.99962	2.2186	2.48047	2.73977	3.07046	3.68748	4.61404	11.4129
0	0.0437978	0.116063	0.167969	0.217769	0.248047	0.2733	0.346276	0.407813	0.489709	0.532546	0.593859	0.667887	0.761366	0.876978	1.02272	1.24023	1.42739	1.58827	1.77349	1.99978	2.2186	2.48047	2.74585	3.07075	3.68748	4.6217	11.4774
0	0.0449932	0.116117	0.167969	0.219101	0.248047	0.27393	0.346276	0.407813	0.489709	0.534507	0.593859	0.667887	0.762378	0.876978	1.02272	1.24023	1.42744	1.58827	1.77957	1.99982	2.22039	2.48047	2.74942	3.07793	3.69089	4.6339	11.5095
0	0.0450758	0.118772	0.167969	0.219642	0.248047	0.274373	0.346276	0.407813	0.491143	0.537762	0.593859	0.667887	0.763437	0.876978	1.02272	1.24023	1.42747	1.58827	1.77963	1.99982	2.22081	2.48047	2.75444	3.08287	3.69127	4.67506	11.6265
0	0.0453663	0.118772	0.167969	0.220852	0.248047	0.274394	0.346276	0.407813	0.494931	0.537762	0.593859	0.667887	0.769779	0.876978	1.02272	1.24023	1.42756	1.58827	1.78622	1.99982	2.22197	2.48047	2.76406	3.08323	3.70032	4.6829	11.6608
0	0.0456433	0.118772	0.167969	0.221472	0.248047	0.274857	0.346276	0.410638	0.495622	0.537762	0.594432	0.667887	0.770037	0.876978	1.02272	1.24023	1.42815	1.58827	1.78771	1.99982	2.22309	2.48047	2.76981	3.08473	3.70171	4.71289	11.6608
0	0.0476421	0.118772	0.167969	0.22167	0.248047	0.27541	0.346276	0.411174	0.496094	0.537762	0.594484	0.667887	0.771039	0.876978	1.02272	1.24023	1.4302	1.58827	1.78869	1.99982	2.22834	2.48047	2.7731	3.09196	3.70482	4.71289	11.7003
0	0.0478385	0.118772	0.167969	0.222576	0.248047	0.276332	0.347661	0.413556	0.496094	0.537762	0.594484	0.667887	0.772455	0.876978	1.02272	1.24023	1.4302	1.58827	1.78869	1.99982	2.23242	2.48047	2.77325	3.09307	3.70996	4.71289	11.9062
0	0.0480664	0.118772	0.168257	0.224565	0.248047	0.276959	0.3481	0.415887	0.496094	0.537762	0.594484	0.667887	0.772745	0.876978	1.02272	1.24023	1.43169	1.59394	1.78869	1.99992	2.23242	2.48047	2.77325	3.09372	3.7207	4.71941	12.3352
0	0.048411	0.118772	0.168542	0.225318	0.248047	0.277289	0.34861	0.416209	0.496094	0.537762	0.594484	0.667887	0.774298	0.876978	1.02462	1.24023	1.43247	1.59763	1.78869	2.00046	2.23242	2.48047	2.77325	3.10059	3.7207	4.71941	12.6528
0	0.0486007	0.118772	0.16856	0.225794	0.248047	0.277325	0.349354	0.417611	0.496094	0.537762	0.594484	0.667887	0.776452	0.876978	1.02462	1.24023	1.43533	1.60169	1.79211	2.00056	2.23242	2.48047	2.77325	3.10089	3.7207	4.71941	12.6547
0	0.0490263	0.118772	0.168627	0.226613	0.248047	0.277325	0.350791	0.418244	0.496094	0.540845	0.601154	0.667887	0.777233	0.881137	1.03024	1.24023	1.43646	1.60322	1.79501	2.00522	2.23314	2.48047	2.77325	3.10802	3.7207	4.71941	12.8714
0	0.0492215	0.118772	0.168719	0.227183	0.248047	0.277325	0.350791	0.418509	0.496094	0.547603	0.601471	0.668311	0.777533	0.886058	1.0308	1.24023	1.43669	1.60412	1.79584	2.00705	2.23318	2.48047	2.77325	3.11196	3.7207	4.71941	12.8851
0	0.0502228	0.118772	0.168963	0.227974	0.248047	0.277325	0.350791	0.419922	0.496094	0.548229	0.602411	0.671875	0.784393	0.886868	1.03349	1.24023	1.437	1.60548	1.79608	2.00748	2.23749	2.48047	2.77325	3.11926	3.7251	4.72991	13.3347
0	0.0503535	0.118772	0.17038	0.227974	0.248047	0.277325	0.350791	0.419922	0.496094	0.548764	0.604829	0.671875	0.784393	0.887295	1.03566	1.24023	1.43709	1.60586	1.79757	2.00751	2.23858	2.48192	2.77325	3.12329	3.72798	4.73893	13.5339
0	0.050604	0.118772	0.171265	0.227974	0.248047	0.277325	0.350791	0.419922	0.496094	0.549034	0.60562	0.672886	0.784393	0.892766	1.03883	1.24023	1.43774	1.60618	1.79962	2.00978	2.23885	2.48402	2.77325	3.12591	3.72896	4.74483	14.3953
0	0.050742	0.118772	0.172297	0.227974	0.248047	0.277325	0.350791	0.419922	0.496094	0.549034	0.60562	0.677104	0.784393	0.892766	1.03972	1.24023	1.43919	1.60822	1.80048	2.01055	2.24348	2.48775	2.77325	3.13513	3.7528	4.74963	14.6684
0	0.0510645	0.118772	0.172336	0.227974	0.248047	0.277325	0.350791	0.419922	0.496094	0.549034	0.60562	0.683209	0.784393	0.893875	1.03975	1.24023	1.44019	1.60847	1.80108	2.01385	2.24523	2.48797	2.77325	3.13537	3.75332	4.76482	14.6851
0	0.0512194	0.118772	0.172784	0.227974	0.248047	0.277325	0.350791	0.419922	0.496094	0.549034	0.60562	0.683352	0.784393	0.894346	1.04112	1.24023	1.44148	1.60852	1.80581	2.01873	2.24616	2.4893	2.77325	3.1366	3.75363	4.76932	14.7102
0	0.0514424	0.119614	0.173035	0.227974	0.248047	0.277325	0.350791	0.419922	0.496094	0.549034	0.60562	0.685828	0.784393	0.894346	1.04348	1.24023	1.44183	1.61011	1.80665	2.02169	2.24616	2.49284	2.77325	3.13757	3.75363	4.77128	14.9158
0	0.0520337	0.119712	0.173691	0.227974	0.248047	0.277325	0.350791	0.419922	0.496094	0.549034	0.606792	0.687814	0.784393	0.894346	1.04398	1.24023	1.44326	1.61014	1.80758	2.02564	2.24616	2.49284	2.77325	3.1426	3.75363	4.77128	15.0636
0	0.0527355	0.119894	0.173782	0.227974	0.248047	0.277325	0.350791	0.419922	0.496094	0.549705	0.607367	0.688909	0.784393	0.894346	1.04911	1.24023	1.44606	1.61117	1.81026	2.03675	2.24616	2.49284	2.77325	3.14688	3.75519	4.77128	15.3869
0	0.0527987	0.120396	0.174532	0.227974	0.248047	0.277325	0.350791	0.419922	0.496094	0.549834	0.608512	0.69167	0.784393	0.894346	1.04967	1.24023	1.44635	1.6123	1.81244	2.03722	2.24616	2.49284	2.77325	3.14996	3.77025	4.78733	15.4846
0	0.0528353	0.12065	0.175069	0.227974	0.248047	0.277325	0.350791	0.419922	0.496094	0.552938	0.611415	0.692553	0.784393	0.894346	1.04967	1.24023	1.44635	1.6123	1.81618	2.03911	2.24616	2.49284	2.77325	3.15162	3.77504	4.79689	15.6977
0	0.0541647	0.120996	0.175325	0.227974	0.248047	0.277325	0.350791	0.419922	0.496094	0.55465	0.611415	0.692553	0.784393	0.894346	1.04999	1.24023	1.44635	1.61254	1.81631	2.03941	2.24627	2.49284	2.77325	3.15778	3.78246	4.8084	15.8692
0	0.0543585	0.122321	0.175396	0.227974	0.248047	0.277325	0.350791	0.419922	0.496094	0.55465	0.611415	0.692553	0.784393	0.894346	1.05232	1.24023	1.44635	1.61267	1.8189	2.03965	2.25061	2.49284	2.77341	3.16039	3.79439	4.8162	16.1707
0	0.0544723	0.122487	0.175396	0.227974	0.248047	0.277325	0.350791	0.419922	0.496094	0.55465	0.611719	0.692978	0.784393	0.894346	1.05232	1.24023	1.44635	1.61289	1.82117	2.04114	2.25181	2.49284	2.77418	3.16229	3.79439	4.8162	16.5524
0	0.054492	0.122785	0.175396	0.228635	0.248047	0.277325	0.350791	0.419922	0.496094	0.55465	0.611719	0.695886	0.784393	0.894346	1.05237	1.24023	1.44635	1.61324	1.82496	2.04426	2.25213	2.49683	2.77469	3.16261	3.79505	4.8162	16.7684
0	0.0549613	0.122956	0.175396	0.231246	0.248047	0.277325	0.350791	0.419922	0.496094	0.55465	0.611719	0.699867	0.784393	0.894346	1.05237	1.24023	1.44635	1.61342	1.8331	2.04545	2.25307	2.50018	2.77961	3.17033	3.79507	4.8162	17.0215
0	0.0552171	0.123308	0.175396	0.231286	0.248047	0.277325	0.350791	0.420337	0.496094	0.55465	0.619102	0.700272	0.784393	0.894346	1.05237	1.24023	1.44635	1.61479	1.83813	2.04545	2.25423	2.50523	2.78038	3.17064	3.80292	4.8162	17.2299
0	0.0557065	0.123471	0.175396	0.23149	0.248047	0.277325	0.350791	0.420364	0.496094	0.55465	0.620117	0.701583	0.784393	0.894346	1.05237	1.24023	1.44635	1.61605	1.84279	2.04545	2.25604	2.50648	2.78072	3.17091	3.80449	4.8162	17.4164
0	0.0560501	0.123854	0.175396	0.231704	0.248047	0.277325	0.350791	0.420364	0.496094	0.55465	0.620117	0.701583	0.784393	0.894346	1.05237	1.24023	1.44635	1.62201	1.84446	2.04545	2.25717	2.50761	2.78518	3.17655	3.80611	4.87335	17.5711
0	0.0562296	0.124023	0.175396	0.231982	0.248047	0.277325	0.350791	0.420364	0.496094	0.55465	0.620117	0.701583	0.784393	0.895633	1.05237	1.24023	1.44635	1.62278	1.84632	2.04626	2.25762	2.51253	2.78561	3.17655	3.80677	4.8803	18.0581
0	0.0567064	0.124023	0.175396	0.233396	0.248047	0.277325	0.350791	0.420364	0.496094	0.55465	0.620117	0.701583	0.784393	0.900275	1.05237	1.24023	1.44635	1.62448	1.84926	2.0519	2.25985	2.51518	2.78606	3.17655	3.80973	4.88596	18.295
0	0.0573097	0.124023	0.175396	0.233624	0.248047	0.277325	0.350791	0.420364	0.496094	0.55465	0.620117	0.701583	0.784393	0.902904	1.05251	1.24023	1.44635	1.62542	1.85184	2.05197	2.26009	2.51957	2.78898	3.18018	3.81108	4.88596	18.3923
0	0.0584583	0.124023	0.175396	0.233698	0.248047	0.277325	0.350791	0.420364	0.496094	0.55465	0.620117	0.701583	0.785345	0.902904	1.05265	1.24031	1.44635	1.62742	1.85758	2.05431	2.26899	2.52058	2.79598	3.18602	3.81139	4.89242	18.4374
0	0.0585916	0.124023	0.175396	0.233802	0.248047	0.277325	0.350791	0.420479	0.496094	0.55465	0.620117	0.701583	0.786662	0.904539	1.05611	1.24642	1.44635	1.62785	1.86591	2.05753	2.27141	2.52136	2.80114	3.19227	3.82314	4.92359	18.6052
0	0.0587638	0.124023	0.175396	0.234255	0.248047	0.277325	0.350791	0.421594	0.496094	0.55465	0.620117	0.701583	0.787817	0.908568	1.05618	1.24746	1.44635	1.62792	1.87384	2.05942	2.27283	2.52366	2.80449	3.19918	3.84236	4.94425	18.8336
0	0.0589593	0.124023	0.175396	0.235427	0.248047	0.277325	0.350791	0.422422	0.496094	0.55465	0.620117	0.701583	0.78796	0.910292	1.0578	1.24852	1.44635	1.62823	1.87384	2.06017	2.27405	2.52384	2.80515	3.20193	3.85072	4.94747	19.0199
0	0.0592039	0.124023	0.175396	0.235821	0.248047	0.277325	0.350791	0.423536	0.496094	0.55465	0.620117	0.701583	0.789514	0.910709	1.05966	1.24852	1.44635	1.62855	1.87768	2.06802	2.27672	2.52731	2.81018	3.20196	3.85072	4.96094	19.0448
0	0.0597716	0.124023	0.175396	0.235871	0.248047	0.277325	0.350791	0.427881	0.496094	0.55465	0.620117	0.701583	0.792307	0.917578	1.06442	1.24852	1.44635	1.62992	1.87885	2.07235	2.27961	2.52839	2.8166	3.20496	3.85072	4.96094	19.0675
0	0.0598346	0.124023	0.175396	0.23641	0.248047	0.277325	0.350791	0.428238	0.496094	0.55465	0.620117	0.701583	0.792307	0.917578	1.06442	1.24852	1.44635	1.63931	1.88195	2.07292	2.28033	2.52923	2.81716	3.21264	3.85072	4.96713	19.2039
0	0.0600085	0.124023	0.175396	0.237544	0.248047	0.277325	0.350791	0.428238	0.496094	0.55465	0.620117	0.701583	0.792307	0.918909	1.06442	1.24852	1.44635	1.63933	1.88333	2.07362	2.2809	2.52959	2.82568	3.21446	3.85694	4.96713	19.2753
0	0.0601369	0.124023	0.175396	0.237544	0.248047	0.277325	0.350791	0.428238	0.496094	0.55465	0.620117	0.701583	0.794137	0.919907	1.06689	1.24857	1.44635	1.63984	1.88562	2.07401	2.28216	2.52959	2.82629	3.21919	3.8587	4.96713	19.3585
0	0.0601958	0.124023	0.175396	0.237544	0.248047	0.277325	0.350791	0.428238	0.496094	0.55465	0.620117	0.701583	0.794137	0.91995	1.06689	1.25192	1.44635	1.64013	1.88907	2.07715	2.28251	2.52959	2.82634	3.22461	3.8587	4.96713	19.4466
0	0.0603486	0.124023	0.175396	0.237544	0.248047	0.277325	0.350791	0.428238	0.496094	0.55465	0.620117	0.703421	0.794137	0.920207	1.06689	1.25317	1.44635	1.64302	1.88907	2.07839	2.28522	2.52959	2.82762	3.22461	3.87334	4.97063	19.4586
0	0.0605464	0.124023	0.175396	0.237544	0.248047	0.277325	0.350791	0.428238	0.496094	0.55465	0.620117	0.704009	0.794137	0.923828	1.06689	1.25609	1.44935	1.64639	1.88907	2.08172	2.2858	2.52959	2.82817	3.22461	3.87462	4.98568	19.6474
0	0.0605693	0.124023	0.175396	0.23831	0.248047	0.277325	0.350791	0.428238	0.496094	0.55465	0.620157	0.704868	0.794137	0.92479	1.06689	1.26195	1.45175	1.6471	1.88983	2.08298	2.28688	2.52959	2.82817	3.22461	3.87462	4.9993	19.7022
0	0.0608985	0.124023	0.175396	0.238482	0.248047	0.277325	0.350791	0.428238	0.496094	0.55465	0.620157	0.709441	0.794137	0.925744	1.06689	1.26245	1.45254	1.64715	1.89065	2.0833	2.28688	2.52959	2.82902	3.22461	3.87462	5.02257	19.8267
0	0.0615161	0.124023	0.175396	0.23854	0.248047	0.277325	0.350791	0.428238	0.496094	0.55465	0.620157	0.710494	0.794137	0.926876	1.06788	1.2648	1.45407	1.65083	1.8926	2.08553	2.28688	2.52961	2.82965	3.22655	3.87462	5.02257	19.9736
0	0.0617044	0.124023	0.175396	0.238766	0.248047	0.277588	0.350791	0.428238	0.496094	0.55465	0.620157	0.711319	0.794137	0.93064	1.06895	1.2648	1.45449	1.65354	1.89296	2.08759	2.28688	2.53317	2.83423	3.23078	3.87462	5.02567	20.3111
0	0.0637727	0.124023	0.175396	0.239541	0.248047	0.278461	0.350791	0.428238	0.496094	0.55465	0.620157	0.71184	0.794137	0.931497	1.07131	1.2648	1.4572	1.65406	1.89633	2.08821	2.28688	2.53621	2.84234	3.23414	3.87849	5.05845	20.3459
0	0.0638841	0.124023	0.175396	0.240224	0.248047	0.278724	0.350791	0.428238	0.496094	0.55465	0.620157	0.71222	0.794137	0.933147	1.0727	1.2648	1.46102	1.65968	1.89644	2.09075	2.28688	2.5404	2.84886	3.23652	3.88189	5.07586	20.4304
0	0.0643731	0.124023	0.175396	0.241313	0.248047	0.27926	0.350791	0.428238	0.496094	0.55465	0.620407	0.712631	0.795473	0.934281	1.07294	1.2648	1.46134	1.66274	1.89672	2.09082	2.28688	2.54271	2.85045	3.23911	3.88255	5.0895	20.6476
0	0.0647977	0.124023	0.175396	0.241608	0.248047	0.282372	0.350791	0.432519	0.496094	0.55465	0.621215	0.712631	0.796279	0.937784	1.07639	1.2648	1.46672	1.66395	1.89719	2.09756	2.28688	2.5442	2.8513	3.25016	3.88543	5.09072	20.6476
0	0.0650721	0.124023	0.175396	0.241755	0.248047	0.283038	0.350791	0.43255	0.496094	0.55465	0.622953	0.713672	0.798451	0.938974	1.08113	1.2648	1.46709	1.66395	1.89776	2.1002	2.28688	2.54531	2.85178	3.25583	3.88962	5.11362	20.8654
0	0.0656263	0.124023	0.175396	0.241923	0.248047	0.283888	0.350791	0.43255	0.496094	0.55465	0.623781	0.713672	0.802122	0.938974	1.08122	1.2648	1.4675	1.66395	1.89809	2.10138	2.28909	2.54644	2.85264	3.25821	3.90014	5.11362	20.8654
0	0.0657891	0.124023	0.175396	0.242046	0.248047	0.285128	0.350791	0.43255	0.496094	0.55465	0.628395	0.713876	0.803035	0.939781	1.08297	1.2648	1.46838	1.66395	1.89915	2.10388	2.28969	2.54769	2.85272	3.26255	3.90127	5.11362	20.9552
0	0.0666099	0.124023	0.175396	0.242299	0.248047	0.286799	0.350791	0.43255	0.496094	0.55465	0.629583	0.715501	0.803779	0.939961	1.08441	1.2648	1.46973	1.66395	1.90024	2.10475	2.29046	2.55256	2.85377	3.26255	3.92197	5.11362	21.084
0	0.0679616	0.124023	0.176246	0.245806	0.248047	0.288367	0.350791	0.43255	0.496094	0.55465	0.629688	0.716243	0.805683	0.939961	1.08491	1.2648	1.4752	1.66395	1.90035	2.10475	2.29246	2.5538	2.85386	3.26468	3.92197	5.13061	21.1902
0	0.0684124	0.124023	0.17669	0.246437	0.248047	0.288367	0.350791	0.43276	0.496094	0.55465	0.631421	0.717531	0.807877	0.939961	1.09129	1.2648	1.47608	1.66453	1.90085	2.10475	2.29458	2.5538	2.85506	3.26548	3.92197	5.17937	21.6952
0	0.0690049	0.124023	0.177245	0.247035	0.248047	0.288367	0.350791	0.434946	0.496094	0.55465	0.632398	0.717563	0.80975	0.939961	1.09335	1.2648	1.48543	1.66656	1.90198	2.10889	2.29673	2.5538	2.85717	3.27303	3.92197	5.17937	21.942
0	0.069677	0.124023	0.178084	0.247288	0.248047	0.288367	0.35232	0.436152	0.496094	0.55465	0.632398	0.719342	0.811136	0.944256	1.09502	1.2648	1.48546	1.66765	1.90357	2.10919	2.29805	2.5538	2.86644	3.27494	3.92197	5.18736	22.1998
0	0.0699111	0.124023	0.179203	0.247424	0.248047	0.288367	0.352371	0.436246	0.496094	0.55465	0.632398	0.720917	0.813553	0.944534	1.09749	1.2648	1.48682	1.67195	1.90428	2.1103	2.30727	2.5538	2.87143	3.27966	3.92197	5.21489	22.2594
0	0.0701076	0.124023	0.179242	0.248047	0.248047	0.289379	0.352576	0.438112	0.496094	0.55465	0.632398	0.720917	0.815321	0.944534	1.09807	1.2648	1.48826	1.67624	1.90676	2.11195	2.30772	2.5538	2.87169	3.30936	3.92197	5.21489	22.3297
0	0.0702298	0.124023	0.179359	0.248047	0.248047	0.290358	0.353087	0.438341	0.496094	0.556142	0.632398	0.720917	0.815625	0.944534	1.10045	1.2648	1.48828	1.67654	1.90807	2.11343	2.30864	2.5538	2.87479	3.319	3.92197	5.23255	22.7081
0	0.0711071	0.124023	0.179989	0.248047	0.248047	0.292239	0.353898	0.440195	0.496094	0.556192	0.632398	0.720917	0.815625	0.945584	1.10788	1.2648	1.48828	1.6785	1.90845	2.11439	2.3112	2.5538	2.87516	3.32026	3.92692	5.25602	23.5645
0	0.0719528	0.124023	0.180352	0.248047	0.248047	0.292346	0.354242	0.442072	0.496094	0.557102	0.632398	0.720985	0.815625	0.946159	1.10879	1.2648	1.48828	1.67863	1.91485	2.11513	2.3141	2.5538	2.87648	3.3261	3.9297	5.26187	23.6946
0	0.0723109	0.124023	0.180583	0.248047	0.248047	0.29305	0.355834	0.442164	0.496094	0.560179	0.632398	0.722461	0.815625	0.946303	1.10887	1.2648	1.48828	1.68266	1.91525	2.11589	2.31534	2.55715	2.87715	3.3279	3.93886	5.32579	24.32
0	0.0727545	0.124023	0.180773	0.248047	0.248047	0.293409	0.356316	0.442503	0.496094	0.563384	0.632398	0.72254	0.815881	0.950175	1.1093	1.26578	1.48828	1.68608	1.9164	2.11931	2.31759	2.5574	2.87785	3.3279	3.9407	5.34309	24.3756
0	0.0730375	0.124023	0.181094	0.248047	0.248047	0.29371	0.356406	0.442841	0.496094	0.563384	0.632398	0.723175	0.818127	0.951373	1.1093	1.26701	1.48828	1.68887	1.92009	2.11931	2.32129	2.55956	2.87811	3.33713	3.96681	5.35431	24.4298
0	0.0733978	0.124023	0.181773	0.248047	0.248047	0.294956	0.357252	0.443154	0.496094	0.565055	0.632398	0.723175	0.819741	0.954223	1.1093	1.2671	1.48828	1.68974	1.92014	2.11931	2.3223	2.56047	2.87859	3.33713	3.96875	5.41743	24.4914
0	0.0739749	0.124023	0.182009	0.248047	0.248047	0.295699	0.357973	0.444771	0.496094	0.569123	0.632398	0.723175	0.821913	0.954914	1.1093	1.26839	1.48828	1.69054	1.92158	2.11931	2.32699	2.562	2.88222	3.33924	3.96875	5.41743	24.7712
0	0.0743965	0.124023	0.182559	0.248047	0.248047	0.298442	0.358035	0.445218	0.496094	0.572155	0.635165	0.723175	0.821972	0.955142	1.1093	1.26867	1.48828	1.69287	1.92171	2.12006	2.3314	2.56374	2.88655	3.35169	3.96875	5.44009	24.8245
0	0.0744606	0.124023	0.183545	0.248047	0.250469	0.29914	0.358045	0.447173	0.496094	0.576734	0.639606	0.723175	0.821972	0.955314	1.1093	1.27091	1.48828	1.69448	1.9227	2.12274	2.33233	2.56395	2.8927	3.36279	3.96875	5.44009	24.8357
0	0.074646	0.124023	0.183831	0.248047	0.250625	0.302143	0.360498	0.447173	0.496094	0.576734	0.640759	0.723175	0.821972	0.955498	1.1093	1.27127	1.48828	1.69554	1.92348	2.12549	2.33353	2.56485	2.8927	3.36574	3.96875	5.44574	25.0638
0	0.0750351	0.124023	0.1839	0.248047	0.250904	0.302203	0.36186	0.447173	0.496094	0.576734	0.6415	0.723175	0.821972	0.957569	1.11175	1.27422	1.48828	1.69663	1.92397	2.12647	2.3372	2.56919	2.8927	3.3738	3.9724	5.46267	25.0822
0	0.0754099	0.124023	0.185592	0.248047	0.251953	0.30281	0.36242	0.447173	0.496183	0.576734	0.64316	0.723175	0.82715	0.957569	1.11621	1.27588	1.48828	1.69753	1.92447	2.12658	2.33969	2.56989	2.89454	3.3738	3.97649	5.46267	25.152
0	0.0757717	0.124023	0.185731	0.248047	0.251953	0.30281	0.36619	0.447173	0.496672	0.576734	0.643528	0.723175	0.828763	0.959915	1.12049	1.2759	1.48828	1.69892	1.92453	2.12737	2.34007	2.5735	2.89627	3.3738	3.97669	5.49075	26.0461
0	0.0760459	0.124023	0.186139	0.248047	0.251953	0.30281	0.367095	0.447173	0.498847	0.576734	0.644536	0.723175	0.828931	0.966051	1.12093	1.27685	1.48828	1.70085	1.92713	2.12775	2.34007	2.57494	2.89857	3.3738	3.9895	5.59619	26.2145
0	0.076278	0.124023	0.187179	0.248047	0.251953	0.30281	0.367191	0.447173	0.503807	0.578739	0.644808	0.723175	0.831447	0.968635	1.12228	1.2769	1.48828	1.70163	1.93441	2.13067	2.34007	2.57545	2.90331	3.3738	3.99964	5.66721	27.0814
0	0.0764227	0.124023	0.187795	0.248047	0.251953	0.30281	0.367597	0.447173	0.503906	0.5798	0.645198	0.723175	0.831975	0.968654	1.12308	1.2769	1.48828	1.70199	1.93454	2.1332	2.34007	2.58051	2.90331	3.39986	3.99964	5.66721	27.0928
0	0.0770968	0.124023	0.187795	0.248047	0.251953	0.30281	0.367597	0.447173	0.503906	0.580387	0.647414	0.723175	0.831975	0.968654	1.12469	1.27922	1.48828	1.70254	1.93731	2.13378	2.34007	2.58243	2.90382	3.43243	4.00718	5.69938	27.364
0	0.0772637	0.124023	0.187795	0.248047	0.252501	0.30281	0.367597	0.447173	0.503906	0.581052	0.648227	0.723175	0.832975	0.968654	1.12584	1.28036	1.4896	1.70284	1.93731	2.13378	2.34007	2.589	2.91271	3.43284	4.02826	5.71047	27.4212
0	0.0785369	0.124023	0.187795	0.248047	0.253633	0.30281	0.367597	0.447173	0.50578	0.582216	0.650619	0.729836	0.83306	0.970942	1.12611	1.28087	1.49375	1.70311	1.93731	2.13378	2.34209	2.58969	2.91534	3.43853	4.03791	5.72661	27.648
0	0.079578	0.124023	0.187795	0.248047	0.254008	0.30281	0.367597	0.447173	0.506209	0.583978	0.652327	0.731667	0.833215	0.971442	1.12724	1.28094	1.49385	1.70478	1.93731	2.13378	2.34341	2.58969	2.91741	3.45188	4.06827	5.7534	27.7391
0	0.0796834	0.124023	0.187795	0.248047	0.256374	0.303069	0.367597	0.447351	0.50641	0.587891	0.652684	0.732572	0.835347	0.974467	1.12893	1.28471	1.49392	1.7048	1.93731	2.13378	2.34761	2.58969	2.92178	3.45489	4.0786	5.7534	28.0995
0	0.0800177	0.124023	0.187795	0.248047	0.257757	0.303903	0.367597	0.451016	0.507452	0.587891	0.652819	0.733942	0.83571	0.981816	1.13073	1.28518	1.49742	1.70692	1.93731	2.13378	2.35077	2.58969	2.92564	3.45489	4.08487	5.76942	29.9675
0	0.0803538	0.124023	0.187795	0.248047	0.2578	0.304754	0.367597	0.45227	0.509669	0.587891	0.652819	0.737537	0.839844	0.982061	1.13238	1.2875	1.49793	1.70726	1.93731	2.13378	2.35318	2.59463	2.92733	3.45489	4.09089	5.76942	29.9737
0	0.0808696	0.124023	0.187795	0.248047	0.257949	0.305859	0.367597	0.45227	0.509766	0.593859	0.652819	0.741576	0.839844	0.982479	1.13264	1.28962	1.49854	1.70853	1.93731	2.13504	2.35387	2.59483	2.92877	3.45489	4.09089	5.76942	31.6695
0	0.0813384	0.124023	0.187795	0.248047	0.258159	0.305859	0.367597	0.45227	0.509766	0.593859	0.652819	0.74223	0.840406	0.983012	1.13292	1.29192	1.5005	1.70879	1.93731	2.13557	2.35502	2.60217	2.93004	3.45489	4.09089	5.78671	32.308
0	0.0813753	0.124023	0.187795	0.248047	0.258236	0.305859	0.367597	0.45227	0.509766	0.593859	0.652819	0.74223	0.840555	0.983303	1.13378	1.29307	1.50117	1.7093	1.93731	2.1357	2.35529	2.60887	2.93262	3.45489	4.0937	5.85412	32.9342
0	0.081874	0.124023	0.187795	0.248047	0.260698	0.305859	0.368325	0.45227	0.509766	0.593859	0.652819	0.74223	0.843606	0.984013	1.13816	1.29345	1.50166	1.70937	1.93731	2.13629	2.35911	2.61093	2.93365	3.45489	4.09646	5.89601	32.9538
0	0.0818785	0.124023	0.187795	0.248047	0.260814	0.305859	0.369208	0.45227	0.509766	0.593859	0.652819	0.744141	0.847936	0.984809	1.13987	1.29484	1.50458	1.71119	1.93731	2.13725	2.35975	2.6164	2.94523	3.45651	4.10591	5.95312	33.2808
0	0.0822757	0.124023	0.187795	0.248047	0.263202	0.305859	0.370574	0.45227	0.509766	0.593859	0.652819	0.744141	0.852151	0.984865	1.13987	1.29484	1.50813	1.71546	1.93731	2.13887	2.36023	2.62159	2.95254	3.46285	4.10591	5.97376	34.2556
0	0.0827173	0.124023	0.187795	0.248047	0.264303	0.305859	0.37207	0.45227	0.509766	0.593859	0.652819	0.744141	0.852751	0.985472	1.14231	1.29484	1.50841	1.71652	1.93731	2.14172	2.36651	2.62366	2.95659	3.47249	4.12775	5.99432	34.9544
0	0.0828756	0.124023	0.187795	0.248047	0.264636	0.305859	0.37207	0.45227	0.509766	0.593859	0.652819	0.744141	0.854753	0.992188	1.14231	1.29538	1.50881	1.71695	1.93731	2.14285	2.36753	2.62944	2.95659	3.47266	4.12832	5.99432	38.638
0	0.0831791	0.124023	0.187795	0.248047	0.265032	0.306878	0.37207	0.45227	0.509766	0.593859	0.652819	0.744141	0.854851	0.992188	1.14231	1.29614	1.50881	1.71888	1.93784	2.14359	2.37277	2.6304	2.962	3.47459	4.13281	5.99945	42.7706
0	0.083209	0.124023	0.187795	0.248047	0.26533	0.30696	0.37207	0.45227	0.509766	0.594484	0.652819	0.744141	0.855111	0.992188	1.14262	1.29855	1.50881	1.72176	1.9407	2.144	2.37757	2.63677	2.96295	3.4807	4.15428	6.04034	44.7833
0	0.0832589	0.124023	0.187795	0.248047	0.265582	0.308516	0.37207	0.452355	0.509766	0.594484	0.655939	0.744141	0.85612	0.992188	1.14277	1.29924	1.50881	1.72187	1.94236	2.14476	2.37919	2.64308	2.96972	3.4815	4.15802	6.0556	46.5642
0	0.0832718	0.124023	0.188237	0.248047	0.265582	0.309049	0.37207	0.453488	0.509766	0.594484	0.655939	0.744141	0.856334	0.992188	1.14344	1.29968	1.50881	1.72293	1.94285	2.14548	2.38319	2.64634	2.97144	3.48304	4.15802	6.12631	47.0695
0	0.0836456	0.124023	0.188785	0.248047	0.265582	0.310587	0.37207	0.453991	0.510857	0.594484	0.660797	0.744141	0.85947	0.992188	1.14344	1.30333	1.50881	1.72322	1.94449	2.14607	2.38401	2.648	2.97188	3.48747	4.15802	6.20613	47.6004
0	0.0839844	0.124023	0.188996	0.248047	0.265582	0.312592	0.37207	0.454214	0.510857	0.594484	0.661768	0.744141	0.859693	0.992188	1.14344	1.30379	1.50881	1.73252	1.94983	2.14622	2.38735	2.65244	2.97656	3.50292	4.15802	6.21977	47.7804
0	0.0839844	0.124023	0.189063	0.248047	0.265582	0.315156	0.37207	0.455948	0.510857	0.594484	0.66263	0.744141	0.861954	0.992188	1.14344	1.30385	1.50881	1.73409	1.95036	2.15016	2.38852	2.65303	2.97656	3.50791	4.15802	6.22098	48.185
0	0.0839844	0.124023	0.190461	0.248047	0.265582	0.315268	0.37207	0.455948	0.510857	0.594484	0.667737	0.744141	0.863697	0.992188	1.14344	1.30506	1.50892	1.7345	1.95105	2.15029	2.38918	2.66107	2.97656	3.50791	4.15802	6.22098	51.3751
0	0.0839844	0.124023	0.190851	0.248047	0.265582	0.320765	0.37207	0.455948	0.510857	0.595687	0.667887	0.744141	0.866165	0.992675	1.14856	1.30549	1.50935	1.73633	1.9519	2.15596	2.38952	2.66604	2.98166	3.50791	4.15802	6.22098	51.6367
0	0.0839844	0.124023	0.190869	0.248047	0.265582	0.321014	0.37207	0.455948	0.510857	0.598186	0.667887	0.744141	0.867137	0.994585	1.1538	1.30564	1.51204	1.73633	1.95229	2.15614	2.39191	2.668	2.98183	3.50791	4.15807	6.22098	52.4131
0	0.0839844	0.124023	0.19116	0.248047	0.265582	0.322404	0.37207	0.455948	0.510857	0.59988	0.667887	0.744141	0.868164	0.995896	1.15383	1.30871	1.51273	1.73633	1.9557	2.15928	2.39789	2.67155	2.98326	3.50791	4.18747	6.22098	53.367
0	0.0839844	0.124023	0.191185	0.248047	0.266096	0.322404	0.37207	0.455948	0.510857	0.600052	0.667887	0.744141	0.868164	0.996836	1.15384	1.31116	1.51286	1.73633	1.95811	2.1641	2.40013	2.67155	2.9838	3.50791	4.18897	6.24566	53.5287
0	0.0839844	0.124023	0.191335	0.248047	0.267167	0.322404	0.37207	0.455948	0.510995	0.600445	0.667887	0.744141	0.868164	0.997635	1.15546	1.31123	1.5139	1.73633	1.95961	2.16431	2.40291	2.67155	2.98875	3.50791	4.2168	6.32398	54.0924
0	0.0839844	0.124023	0.191655	0.248047	0.267355	0.322404	0.37207	0.457013	0.511362	0.600591	0.667887	0.744141	0.868164	0.998644	1.15552	1.31156	1.51469	1.7365	1.96071	2.16511	2.40316	2.67155	2.98951	3.50791	4.2168	6.43967	54.643
0	0.0839844	0.124023	0.192058	0.248047	0.268729	0.322404	0.37207	0.459968	0.511362	0.60562	0.667887	0.744141	0.868164	0.999098	1.15945	1.31411	1.51531	1.74133	1.96197	2.16753	2.40976	2.67155	2.99123	3.50791	4.2168	6.43967	55.0686
0	0.0839844	0.124023	0.192798	0.248047	0.269145	0.322404	0.37207	0.461364	0.511362	0.60562	0.667887	0.744141	0.868366	0.999909	1.16026	1.31839	1.51737	1.74201	1.96601	2.16848	2.41246	2.67286	2.99389	3.50854	4.2168	6.44922	55.9647
0	0.0839844	0.124023	0.194847	0.248047	0.271751	0.322404	0.37207	0.462249	0.511362	0.60562	0.667887	0.744141	0.868612	0.999909	1.16178	1.31871	1.51954	1.74308	1.96635	2.17096	2.41272	2.67749	2.99562	3.54033	4.2168	6.56739	56.287
0	0.0839844	0.124023	0.195129	0.248047	0.272255	0.322404	0.37207	0.463501	0.511362	0.606604	0.667887	0.744141	0.871088	0.999909	1.16433	1.32074	1.52343	1.7455	1.96714	2.17119	2.41367	2.67847	2.99703	3.54228	4.2168	6.59077	56.5835
0	0.0839844	0.124023	0.195177	0.248047	0.272392	0.322404	0.372285	0.464855	0.511362	0.606731	0.673222	0.744141	0.871088	0.999909	1.16563	1.32131	1.52362	1.74588	1.96753	2.17231	2.41473	2.67912	2.99716	3.5457	4.219	6.67887	58.971
0	0.0839844	0.124023	0.195251	0.248047	0.274139	0.322771	0.373267	0.466353	0.511362	0.608585	0.677104	0.744141	0.874074	0.999909	1.16675	1.32406	1.52458	1.74661	1.96815	2.17319	2.41629	2.68304	2.99716	3.55055	4.22409	6.84268	60.5138
0	0.0839844	0.124023	0.195376	0.248047	0.276263	0.323201	0.37559	0.466881	0.511362	0.609319	0.677104	0.744141	0.876978	1.0012	1.16675	1.32561	1.52584	1.74809	1.96939	2.17416	2.41683	2.68411	2.99716	3.55149	4.22409	6.87855	65.2481
0	0.0839844	0.124023	0.195718	0.248047	0.277325	0.323559	0.37559	0.467527	0.511362	0.610139	0.677104	0.744141	0.876978	1.00533	1.16814	1.32791	1.52645	1.75396	1.97078	2.17923	2.41966	2.69187	2.99716	3.55149	4.24205	6.98506
0	0.0839844	0.124023	0.19582	0.248047	0.277325	0.323723	0.37559	0.468077	0.511362	0.611415	0.677104	0.747207	0.876978	1.00594	1.17	1.32956	1.52682	1.75396	1.97103	2.18091	2.42298	2.69449	2.99716	3.55926	4.24824	7.09431
0	0.0839844	0.124023	0.196551	0.248047	0.277325	0.324678	0.37559	0.468467	0.511362	0.611415	0.677104	0.74825	0.876978	1.00597	1.17003	1.33074	1.52764	1.75396	1.97339	2.18196	2.42376	2.69558	2.99716	3.56122	4.26756	7.10731
0	0.0839844	0.124023	0.197025	0.248047	0.277325	0.326744	0.37559	0.470762	0.511362	0.611415	0.677104	0.749912	0.876978	1.00717	1.17003	1.33185	1.52868	1.75396	1.97342	2.18244	2.42608	2.69896	3.00767	3.56129	4.26756	7.19763
0	0.0839844	0.124023	0.19703	0.248047	0.277325	0.326911	0.37559	0.470977	0.511362	0.611415	0.677403	0.752236	0.876978	1.00718	1.17003	1.33303	1.53076	1.75396	1.97352	2.18515	2.42875	2.69916	3.01154	3.56162	4.26756	7.34571
0	0.0839844	0.124023	0.197682	0.248047	0.277325	0.327263	0.37584	0.47364	0.511362	0.611719	0.680262	0.754405	0.876978	1.00781	1.17003	1.33305	1.53269	1.75396	1.97738	2.18546	2.43115	2.70197	3.01749	3.56907	4.26756	7.36244
0	0.0839844	0.124023	0.198388	0.248047	0.277325	0.327377	0.379841	0.475087	0.512615	0.611719	0.681837	0.754405	0.876978	1.01072	1.17003	1.33342	1.53281	1.75396	1.97774	2.1872	2.43582	2.70354	3.01762	3.5713	4.26756	7.44554
0	0.0839844	0.124023	0.199279	0.248047	0.277325	0.328323	0.381031	0.480764	0.514058	0.612582	0.683343	0.754405	0.876978	1.01131	1.17375	1.33417	1.53712	1.75396	1.97781	2.18898	2.4368	2.71211	3.01762	3.61162	4.26756	7.54405
0	0.0839844	0.124023	0.199484	0.248047	0.277325	0.329079	0.381299	0.481339	0.514109	0.614114	0.683361	0.754405	0.876978	1.01131	1.17411	1.33446	1.54019	1.75396	1.97788	2.1898	2.43947	2.71229	3.01762	3.61162	4.26756	7.64129
0	0.0839844	0.124023	0.200508	0.248047	0.277325	0.32924	0.381624	0.481998	0.514296	0.615099	0.683922	0.754405	0.878005	1.01429	1.17534	1.33577	1.54048	1.75396	1.97802	2.19086	2.44298	2.71741	3.01821	3.61909	4.26756	7.64129
0	0.0839844	0.124023	0.201003	0.248047	0.277325	0.329294	0.385008	0.483146	0.515203	0.616899	0.683922	0.754405	0.880885	1.01431	1.17646	1.33577	1.54283	1.75396	1.97859	2.19114	2.44515	2.71844	3.0278	3.62885	4.26756	7.69345
0	0.0839844	0.124023	0.202383	0.248047	0.277325	0.329491	0.385042	0.483838	0.517019	0.617761	0.683922	0.754523	0.881744	1.01479	1.18169	1.33577	1.54403	1.75396	1.98091	2.19172	2.44521	2.72037	3.0278	3.63145	4.26756	7.70145
0	0.0839844	0.124023	0.202421	0.248047	0.277325	0.330874	0.386404	0.484657	0.517488	0.619674	0.683922	0.760511	0.88427	1.01479	1.1852	1.33577	1.5447	1.75396	1.98233	2.19535	2.44884	2.72728	3.0278	3.63145	4.28195	7.7651
0	0.0839844	0.124023	0.202426	0.248047	0.277325	0.331149	0.387174	0.4852	0.517662	0.620117	0.683922	0.76059	0.886657	1.01566	1.18568	1.33577	1.54502	1.75396	1.98438	2.19571	2.44955	2.72852	3.0278	3.63315	4.28195	7.78883
0	0.0845477	0.124023	0.202596	0.248047	0.277325	0.331173	0.387573	0.486549	0.519861	0.620117	0.686487	0.761366	0.887261	1.01953	1.18772	1.33577	1.5462	1.75396	1.98438	2.20024	2.45283	2.72899	3.0278	3.64394	4.28195	7.84393
0	0.084672	0.124023	0.202731	0.248047	0.277325	0.33338	0.388797	0.486918	0.519861	0.620117	0.687694	0.764705	0.88816	1.01953	1.18914	1.33577	1.54743	1.75396	1.98438	2.20511	2.45296	2.73115	3.0278	3.64723	4.28348	7.89475
0	0.0856323	0.124023	0.203906	0.248047	0.277325	0.33592	0.389751	0.488751	0.519861	0.620117	0.688318	0.768615	0.8887	1.02171	1.19333	1.33577	1.54748	1.75396	1.98438	2.20861	2.45554	2.73179	3.0278	3.64796	4.29927	8.00696
0	0.0856628	0.124023	0.203906	0.248047	0.277325	0.335938	0.38997	0.489709	0.519861	0.620117	0.690935	0.768877	0.889394	1.02241	1.19347	1.33577	1.55008	1.75396	1.98438	2.20992	2.45554	2.73381	3.0278	3.64838	4.30956	8.03381
0	0.0860892	0.124023	0.203906	0.248047	0.277325	0.335938	0.391449	0.489709	0.519861	0.620117	0.691616	0.769562	0.889634	1.02272	1.19888	1.33577	1.55175	1.75396	1.98438	2.2117	2.45554	2.73457	3.03131	3.65353	4.31381	8.03381
0	0.0868161	0.124023	0.203906	0.248047	0.277325	0.335938	0.391728	0.489709	0.519861	0.620117	0.692553	0.774298	0.889972	1.02272	1.20095	1.33577	1.55218	1.75396	1.98438	2.21199	2.45554	2.7361	3.03686	3.65476	4.33195	8.07582
0	0.0869554	0.124023	0.203906	0.248047	0.277325	0.335938	0.392147	0.489709	0.519861	0.620117	0.692553	0.774298	0.8938	1.02272	1.20121	1.33577	1.55418	1.75396	1.98438	2.21514	2.4558	2.73683	3.03814	3.65719	4.33905	8.07582
0	0.0871347	0.124023	0.203906	0.248047	0.277325	0.335938	0.392197	0.489709	0.520054	0.620117	0.692553	0.774298	0.894346	1.02272	1.20526	1.33577	1.55586	1.75396	1.98544	2.21546	2.45732	2.73823	3.04732	3.6593	4.33905	8.07963
0	0.0873889	0.124023	0.203906	0.248047	0.277325	0.335938	0.392197	0.489803	0.521009	0.620117	0.692553	0.774298	0.894346	1.02272	1.20833	1.33577	1.55619	1.75396	1.98661	2.21704	2.4575	2.73855	3.06981	3.66237	4.35925	8.24546
0	0.0874699	0.124023	0.203906	0.248047	0.277325	0.335938	0.392197	0.490024	0.523507	0.620117	0.692553	0.776452	0.894346	1.02272	1.20976	1.33577	1.55715	1.75396	1.98846	2.21752	2.46003	2.73977	3.07101	3.66266	4.3884	8.24546
0	0.0875814	0.124023	0.203906	0.248047	0.277325	0.337788	0.392197	0.491072	0.524732	0.620117	0.695282	0.78018	0.894346	1.02272	1.21204	1.33577	1.55756	1.75396	1.98895	2.2186	2.46347	2.73977	3.07223	3.6734	4.3954	8.31605
0	0.0877375	0.124931	0.203906	0.248047	0.277325	0.337925	0.392197	0.491228	0.525531	0.620117	0.696922	0.780211	0.894346	1.02272	1.21914	1.33577	1.55925	1.75396	1.98982	2.2186	2.46439	2.74359	3.0728	3.67433	4.41635	8.31975
0	0.0878844	0.126366	0.203906	0.248047	0.277325	0.338686	0.392197	0.492013	0.526163	0.620117	0.697039	0.7804	0.894346	1.02272	1.21989	1.33577	1.56107	1.75396	1.99183	2.2186	2.46752	2.75113	3.07588	3.67453	4.41635	8.43724
0	0.088509	0.126774	0.203906	0.248047	0.277325	0.34061	0.392197	0.492077	0.526187	0.620117	0.698641	0.782089	0.894346	1.02272	1.22022	1.33577	1.5622	1.75396	1.99273	2.21961	2.47268	2.75282	3.08392	3.68748	4.41635	8.56391
0	0.0887725	0.127694	0.203906	0.248047	0.277325	0.341281	0.392197	0.493255	0.526187	0.620117	0.699525	0.783931	0.894346	1.02272	1.22143	1.33577	1.5622	1.75396	1.99514	2.22023	2.47272	2.75365	3.0854	3.68748	4.46484	8.63901
0	0.0890077	0.127882	0.203906	0.248047	0.277325	0.342639	0.392197	0.493475	0.52853	0.620117	0.701583	0.784393	0.894346	1.02272	1.22228	1.33577	1.56232	1.75396	1.99557	2.22032	2.47462	2.75385	3.09542	3.68748	4.46484	8.73815
0	0.0892185	0.127953	0.203906	0.248047	0.277325	0.342879	0.392197	0.493854	0.528755	0.620117	0.701583	0.784393	0.894346	1.02272	1.22283	1.33577	1.56258	1.75396	1.99685	2.22057	2.47743	2.75405	3.0991	3.68748	4.47173	8.80828
0	0.0893577	0.127954	0.203906	0.248047	0.277325	0.343342	0.392197	0.494931	0.531164	0.620117	0.701583	0.784393	0.894346	1.02272	1.22643	1.33577	1.5651	1.75396	1.99982	2.2238	2.48047	2.75444	3.10481	3.68748	4.47173	8.98464
0	0.0894905	0.128533	0.203906	0.248047	0.277325	0.343695	0.392197	0.496094	0.531164	0.620117	0.701583	0.784393	0.894346	1.02272	1.22707	1.33678	1.5653	1.75396	1.99982	2.22759	2.48047	2.7609	3.11498	3.68748	4.47173	9.20785
0	0.0898133	0.128973	0.203906	0.248047	0.277325	0.345663	0.392197	0.496094	0.531684	0.620117	0.701583	0.784393	0.894346	1.02272	1.22777	1.33814	1.56535	1.75396	1.99982	2.23242	2.48047	2.76374	3.11757	3.68748	4.47173	9.28769
0	0.0900197	0.130248	0.203906	0.248047	0.277325	0.345727	0.392197	0.496094	0.533195	0.620117	0.701583	0.784393	0.894346	1.02283	1.22938	1.34156	1.56665	1.75396	1.99982	2.23242	2.48047	2.76395	3.11891	3.68783	4.47173	9.29762
0	0.090206	0.131034	0.203906	0.248047	0.277325	0.346035	0.392197	0.496094	0.533355	0.620117	0.701583	0.784393	0.894346	1.0241	1.23196	1.34566	1.56738	1.75396	1.99982	2.23242	2.48047	2.76428	3.11893	3.68877	4.47173	9.32076
0	0.0908469	0.131847	0.203906	0.248047	0.277325	0.346276	0.392197	0.496094	0.537588	0.620117	0.701583	0.784393	0.894346	1.02462	1.23457	1.34583	1.56808	1.75396	1.99982	2.23242	2.48047	2.76459	3.12793	3.68914	4.47756	9.42578
0	0.0910864	0.132152	0.203906	0.248047	0.277325	0.346276	0.392197	0.496094	0.537762	0.620117	0.701583	0.784393	0.895222	1.02483	1.23523	1.34602	1.56879	1.75396	1.99982	2.23242	2.48047	2.77227	3.13153	3.68915	4.49232	9.42904
0	0.0912014	0.132516	0.203906	0.248047	0.277325	0.346276	0.392197	0.496094	0.537762	0.620117	0.701583	0.784393	0.89608	1.02516	1.23634	1.34841	1.56879	1.75396	1.99982	2.23242	2.48047	2.77302	3.13471	3.69017	4.49232	9.42904
0	0.0924005	0.132776	0.203906	0.248047	0.277325	0.346276	0.392197	0.496094	0.537762	0.620157	0.701583	0.784393	0.900172	1.02999	1.23884	1.354	1.56879	1.75396	1.99982	2.23242	2.48047	2.77325	3.13757	3.69143	4.49232	9.64835
0	0.0928161	0.133087	0.203906	0.248047	0.277325	0.346276	0.392197	0.496094	0.537762	0.620157	0.701583	0.784393	0.900273	1.0317	1.23894	1.3542	1.56879	1.75396	1.99982	2.23242	2.48047	2.77325	3.14008	3.69175	4.49232	9.67383
0	0.0929625	0.133533	0.203906	0.248047	0.277325	0.346276	0.39433	0.496094	0.537762	0.620157	0.701583	0.784393	0.902498	1.03566	1.24023	1.35421	1.56879	1.75396	1.99982	2.23296	2.48047	2.77325	3.14212	3.71127	4.52643	9.68654
0	0.093211	0.134839	0.203906	0.248047	0.277325	0.346276	0.396522	0.496094	0.537762	0.620157	0.701583	0.784393	0.902904	1.03883	1.24023	1.36022	1.56879	1.75396	2.00126	2.24462	2.48047	2.77325	3.16541	3.7207	4.54402	9.70241
0	0.0932646	0.135143	0.203906	0.248047	0.277325	0.346419	0.39694	0.496094	0.537762	0.620157	0.701583	0.784393	0.902904	1.03929	1.24023	1.36041	1.57057	1.75396	2.00278	2.2452	2.48047	2.77325	3.16632	3.7207	4.54515	9.72458
0	0.0933448	0.136979	0.203906	0.248047	0.277325	0.34646	0.397119	0.496094	0.537762	0.620598	0.701583	0.788161	0.902904	1.03972	1.24023	1.36112	1.57199	1.75396	2.00322	2.24616	2.48047	2.77325	3.17655	3.7207	4.55064	9.75301
0	0.0936777	0.137057	0.203906	0.248047	0.277325	0.349572	0.398453	0.496094	0.537762	0.621382	0.701583	0.792271	0.905978	1.03972	1.24023	1.36191	1.57412	1.75396	2.0053	2.24881	2.48047	2.77325	3.17655	3.7207	4.55656	9.77506
0	0.0941665	0.138974	0.203966	0.248047	0.277325	0.34969	0.398657	0.496094	0.537762	0.623372	0.701583	0.792307	0.910127	1.04002	1.24023	1.36519	1.57437	1.75396	2.00681	2.25433	2.48047	2.77325	3.17655	3.7207	4.56108	9.77506
0	0.0942072	0.13915	0.204058	0.248047	0.277325	0.350012	0.400023	0.496094	0.537762	0.625554	0.701583	0.793503	0.912156	1.04258	1.24023	1.36776	1.57496	1.75405	2.00773	2.25578	2.48047	2.77325	3.17655	3.7207	4.56174	9.78764
0	0.0943081	0.139219	0.204773	0.248047	0.277325	0.350791	0.400308	0.496094	0.537762	0.627658	0.701583	0.794137	0.912785	1.04289	1.24023	1.37449	1.57541	1.75577	2.01101	2.25753	2.48047	2.77325	3.17655	3.7207	4.56708	9.8378
0	0.0943499	0.139813	0.205065	0.248047	0.277325	0.350791	0.402186	0.496094	0.537762	0.628438	0.701583	0.794137	0.914532	1.04521	1.24023	1.37714	1.57716	1.7585	2.01229	2.26063	2.48047	2.77325	3.17655	3.7207	4.57376	9.91257
0	0.0950783	0.139867	0.205371	0.248047	0.277325	0.350791	0.404867	0.496094	0.540957	0.629183	0.701583	0.794137	0.917578	1.04522	1.24023	1.3772	1.58157	1.75875	2.01288	2.26075	2.48047	2.77325	3.17655	3.7207	4.57376	9.94974
0	0.0961015	0.140019	0.205806	0.248047	0.277325	0.350791	0.405127	0.496094	0.542108	0.629376	0.702115	0.794137	0.918081	1.04596	1.24023	1.37729	1.58386	1.76067	2.01451	2.26325	2.48047	2.77325	3.18324	3.72162	4.57376	9.94974
0	0.0962058	0.140803	0.205943	0.248047	0.277325	0.350791	0.405879	0.496094	0.543545	0.629593	0.702719	0.794137	0.920442	1.04695	1.24023	1.37848	1.58477	1.76155	2.01482	2.26463	2.48047	2.77325	3.18464	3.72223	4.57725	10.1214
0	0.096234	0.141303	0.20667	0.248047	0.277325	0.350791	0.407812	0.496094	0.543724	0.629688	0.706752	0.794137	0.920766	1.04967	1.24023	1.37955	1.58827	1.76385	2.01488	2.26597	2.48047	2.77325	3.19947	3.72896	4.60757	10.1244
0	0.0964696	0.141579	0.207427	0.248047	0.277325	0.350791	0.407812	0.496094	0.54459	0.630185	0.707097	0.794137	0.920978	1.05089	1.24023	1.38032	1.58827	1.76457	2.01551	2.27166	2.48307	2.77325	3.2032	3.72896	4.61394	10.1699
0	0.0965572	0.142124	0.207739	0.248047	0.277325	0.350791	0.407812	0.496094	0.544678	0.632054	0.7088	0.794137	0.921524	1.05223	1.24023	1.38307	1.58827	1.76468	2.01707	2.27265	2.4834	2.77325	3.21883	3.72896	4.61394	10.179
0	0.0966961	0.142263	0.208798	0.248047	0.277325	0.350791	0.407813	0.496094	0.548905	0.632398	0.710782	0.794398	0.921647	1.05224	1.24023	1.38387	1.58827	1.76624	2.01764	2.27446	2.49284	2.77325	3.22347	3.73243	4.63749	10.1971
0	0.0970092	0.143647	0.209107	0.248047	0.277325	0.350791	0.407813	0.496094	0.549034	0.632398	0.712631	0.794455	0.922062	1.05237	1.24023	1.38561	1.58827	1.77096	2.01835	2.27498	2.49284	2.77325	3.22384	3.73487	4.66038	10.418
0	0.0970546	0.144109	0.209331	0.248047	0.277325	0.350791	0.407813	0.496094	0.549034	0.632398	0.712631	0.794871	0.922114	1.05237	1.24023	1.38585	1.58827	1.77393	2.01965	2.27617	2.49284	2.77325	3.22461	3.7402	4.66038	10.4327
0	0.0970906	0.144124	0.209375	0.248047	0.277325	0.350791	0.407919	0.496094	0.549034	0.632398	0.713529	0.795532	0.922151	1.05237	1.24023	1.38662	1.58827	1.77405	2.02148	2.27693	2.49284	2.77325	3.22461	3.74216	4.68014	10.4651
0	0.0976385	0.14418	0.209481	0.248047	0.278144	0.350791	0.409451	0.496094	0.549034	0.632398	0.713672	0.796279	0.923225	1.05237	1.24023	1.38662	1.58827	1.77676	2.02431	2.27957	2.49284	2.77325	3.22461	3.74292	4.68014	10.4651
0	0.0976695	0.144183	0.209582	0.248047	0.278878	0.350791	0.409551	0.496094	0.549034	0.632398	0.713672	0.796746	0.923828	1.05237	1.24023	1.38662	1.58827	1.77957	2.02787	2.28011	2.49284	2.7734	3.22461	3.74769	4.70636	10.4915
0	0.0976739	0.144183	0.209925	0.248047	0.279273	0.350791	0.409852	0.496094	0.549034	0.632398	0.713672	0.79692	0.923828	1.05237	1.24023	1.38662	1.58827	1.78052	2.02936	2.28034	2.49284	2.77403	3.22461	3.74774	4.71289	10.5529
0	0.0977091	0.144183	0.210117	0.248047	0.27933	0.350791	0.410724	0.496094	0.549034	0.632398	0.713672	0.798229	0.924368	1.05237	1.24023	1.38868	1.58827	1.78203	2.02975	2.28085	2.49284	2.77406	3.22461	3.74817	4.71289	10.5966
0	0.0979585	0.144183	0.210566	0.248047	0.279899	0.350791	0.411197	0.496094	0.552428	0.632398	0.714826	0.802446	0.925372	1.05237	1.24023	1.39002	1.58827	1.78272	2.03366	2.2834	2.49284	2.77456	3.23414	3.75363	4.71289	10.6053
0	0.0980499	0.144183	0.21066	0.248047	0.280712	0.350791	0.411302	0.496094	0.554168	0.632398	0.717563	0.802957	0.926457	1.05237	1.24023	1.39019	1.58827	1.78345	2.03392	2.28646	2.49284	2.77602	3.23414	3.75363	4.71299	10.6689
0	0.0989486	0.144183	0.211206	0.248047	0.281267	0.350791	0.41135	0.496094	0.55465	0.632398	0.717563	0.805016	0.9299	1.05237	1.24023	1.39349	1.58827	1.78349	2.0359	2.28661	2.49284	2.77662	3.23414	3.75363	4.71941	10.7092
0	0.0989984	0.144183	0.211594	0.248047	0.281535	0.350791	0.411447	0.496094	0.55465	0.632398	0.719262	0.805501	0.930963	1.05237	1.24023	1.39544	1.58827	1.78357	2.03663	2.28688	2.49284	2.77954	3.24493	3.75363	4.71941	10.849
0	0.0991321	0.144183	0.211944	0.248047	0.281623	0.350791	0.412269	0.496094	0.55465	0.632398	0.719486	0.80856	0.937379	1.05237	1.24023	1.39723	1.58827	1.78529	2.03682	2.28688	2.49284	2.78215	3.25392	3.75773	4.71941	10.9169
0	0.0993466	0.144183	0.212574	0.248047	0.282116	0.350791	0.41598	0.496094	0.55465	0.632398	0.720917	0.808805	0.938974	1.05237	1.24023	1.39744	1.58827	1.78546	2.03755	2.28688	2.49284	2.78534	3.26255	3.75977	4.72354	11.0151
0	0.0997687	0.144183	0.212701	0.248047	0.282438	0.350791	0.416209	0.496094	0.55465	0.632398	0.720917	0.80934	0.938974	1.05237	1.24023	1.39778	1.58827	1.78621	2.03819	2.28688	2.49382	2.78647	3.26255	3.7712	4.7351	11.0763
0	0.100024	0.144183	0.213616	0.248047	0.283033	0.350791	0.41662	0.496094	0.55465	0.632398	0.720917	0.810193	0.939961	1.05506	1.24023	1.39838	1.58827	1.7867	2.03923	2.28688	2.50257	2.79069	3.26384	3.77913	4.73893	11.0847
0	0.10021	0.144183	0.213965	0.248047	0.283237	0.350791	0.417391	0.496094	0.55465	0.632398	0.720917	0.811314	0.939961	1.05791	1.24023	1.40161	1.58827	1.78869	2.03941	2.28688	2.50774	2.79576	3.26774	3.78943	4.7568	11.093
0	0.100887	0.144183	0.214384	0.248047	0.28432	0.350791	0.419886	0.496094	0.55465	0.632398	0.721411	0.811878	0.940003	1.05805	1.24023	1.40186	1.58827	1.78869	2.04193	2.28932	2.51271	2.79941	3.27405	3.79088	4.76482	11.1731
0	0.101406	0.144183	0.2148	0.248047	0.285293	0.350791	0.419922	0.496094	0.55465	0.632398	0.721538	0.812092	0.94363	1.06228	1.24023	1.40317	1.58827	1.78869	2.0423	2.29651	2.51383	2.80377	3.27879	3.79254	4.77128	11.2061
0	0.10166	0.144183	0.215262	0.248047	0.286596	0.350791	0.419922	0.496094	0.55465	0.632398	0.721611	0.813488	0.94384	1.06233	1.24023	1.40317	1.58827	1.78869	2.0445	2.29725	2.51435	2.80876	3.27907	3.79439	4.77767	11.2089
0	0.101953	0.144183	0.215533	0.248047	0.287755	0.350791	0.419922	0.496094	0.55465	0.632896	0.7226	0.814388	0.944534	1.06273	1.24023	1.40317	1.58827	1.78889	2.04452	2.30758	2.51643	2.81004	3.28664	3.79439	4.80025	11.4666
0	0.101953	0.144183	0.215867	0.248047	0.287823	0.350791	0.419922	0.496094	0.55465	0.63884	0.723175	0.815129	0.944534	1.06314	1.24023	1.40317	1.58827	1.78986	2.04517	2.30772	2.51743	2.81442	3.28847	3.79452	4.8162	11.5068
0	0.101953	0.144183	0.216106	0.248047	0.288061	0.350791	0.419922	0.496094	0.55465	0.639048	0.723175	0.815625	0.944534	1.06344	1.24023	1.40317	1.58827	1.79098	2.04541	2.31227	2.51747	2.81457	3.30109	3.80768	4.8162	11.5628
0	0.101953	0.144183	0.216205	0.248047	0.288367	0.350791	0.419922	0.496094	0.55465	0.639606	0.723175	0.815625	0.944983	1.06385	1.24023	1.40317	1.58827	1.79303	2.04545	2.31373	2.5227	2.81466	3.30276	3.81914	4.8162	11.5628
0	0.101953	0.144183	0.216391	0.248047	0.288367	0.350791	0.419922	0.496094	0.55465	0.639606	0.723175	0.815625	0.945909	1.06442	1.24023	1.40317	1.58827	1.79407	2.04545	2.31525	2.52959	2.8241	3.30936	3.82279	4.8162	11.6608
0	0.101953	0.144183	0.216591	0.248047	0.288367	0.350791	0.419922	0.496094	0.55465	0.639606	0.723175	0.816075	0.951373	1.06689	1.24023	1.40317	1.58827	1.79584	2.04545	2.31804	2.52959	2.82629	3.30973	3.83095	4.83574	11.6688
0	0.101953	0.144183	0.21661	0.248047	0.288367	0.350791	0.419922	0.496094	0.55465	0.640046	0.723175	0.817026	0.953551	1.06689	1.24023	1.40317	1.58827	1.79716	2.04545	2.32094	2.52959	2.82817	3.32028	3.84153	4.872	11.9088
0	0.101953	0.144183	0.216891	0.248047	0.289866	0.350791	0.419922	0.496094	0.55465	0.640057	0.723175	0.81937	0.953915	1.06689	1.24023	1.40418	1.5901	1.79917	2.04545	2.32363	2.52959	2.82817	3.32301	3.85072	4.87335	12.0552
0	0.101953	0.144668	0.216945	0.248047	0.289891	0.350791	0.419922	0.496094	0.55465	0.640988	0.723175	0.820597	0.95416	1.06689	1.24023	1.40473	1.59084	1.80312	2.04545	2.32565	2.53622	2.82817	3.3279	3.85072	4.88596	12.1963
0	0.101953	0.144884	0.218899	0.248047	0.291714	0.350791	0.419922	0.496094	0.55465	0.641757	0.723175	0.821972	0.955432	1.06886	1.24023	1.40489	1.59131	1.80334	2.04574	2.3288	2.54138	2.82817	3.3279	3.85072	4.88596	12.2688
0	0.101953	0.145454	0.219258	0.248047	0.292963	0.350791	0.419922	0.496094	0.55465	0.644161	0.723175	0.821972	0.957569	1.06895	1.24023	1.40595	1.59201	1.80472	2.04618	2.32968	2.54662	2.82817	3.33713	3.85072	4.88596	12.5578
0	0.101953	0.145484	0.219828	0.248047	0.293485	0.350791	0.419922	0.496094	0.55465	0.644442	0.723175	0.821972	0.957569	1.07075	1.24023	1.40631	1.59378	1.80581	2.04665	2.33124	2.54769	2.83227	3.33713	3.8587	4.89225	12.6723
0	0.101953	0.145768	0.220524	0.248047	0.295064	0.350791	0.419922	0.496094	0.55465	0.644808	0.723175	0.823349	0.957569	1.07102	1.24031	1.4072	1.59538	1.80581	2.04894	2.33823	2.54977	2.83289	3.33713	3.86258	4.89225	12.733
0	0.101953	0.145984	0.221538	0.248047	0.295925	0.350791	0.419922	0.496094	0.55465	0.644808	0.723175	0.824605	0.957569	1.07552	1.24176	1.40789	1.59604	1.80581	2.04944	2.34007	2.55097	2.83646	3.33713	3.87462	4.89882	12.984
0	0.101953	0.146205	0.222279	0.248047	0.297363	0.350791	0.420022	0.496094	0.55465	0.645592	0.723175	0.82715	0.957569	1.07609	1.2445	1.41408	1.59689	1.80581	2.05143	2.34007	2.55346	2.84237	3.34648	3.87462	4.91294	13.0219
0	0.101953	0.146257	0.22229	0.248047	0.29767	0.350791	0.420327	0.496094	0.55465	0.648227	0.723175	0.82715	0.961735	1.0818	1.24627	1.41408	1.59835	1.80581	2.05182	2.34007	2.5538	2.8439	3.34928	3.87462	4.92971	13.1675
0	0.101953	0.146347	0.222299	0.248047	0.297742	0.350791	0.420364	0.496094	0.55465	0.648891	0.723175	0.82756	0.962612	1.08197	1.24642	1.41408	1.59954	1.80581	2.05284	2.34007	2.5538	2.84657	3.35464	3.87462	4.94487	13.4152
0	0.101953	0.146975	0.222805	0.248047	0.298364	0.350791	0.420364	0.496094	0.55465	0.651299	0.723175	0.828262	0.967055	1.08214	1.24642	1.41421	1.60137	1.80701	2.05293	2.34007	2.5538	2.85211	3.35975	3.87462	4.96094	13.4518
0	0.101953	0.147122	0.222823	0.248047	0.29976	0.350791	0.420364	0.496094	0.55465	0.652819	0.723175	0.82853	0.967212	1.08245	1.24642	1.41597	1.60327	1.8087	2.05434	2.34007	2.5538	2.85303	3.36296	3.87651	4.96094	13.4952
0	0.101953	0.147229	0.223062	0.248047	0.299816	0.350791	0.420364	0.496094	0.55465	0.652819	0.724526	0.831403	0.968654	1.08278	1.24642	1.41762	1.60434	1.81026	2.05549	2.34007	2.5538	2.85696	3.36597	3.88255	4.96094	14.1191
0	0.101953	0.147404	0.223538	0.248047	0.301614	0.350791	0.420364	0.496094	0.55465	0.652819	0.725245	0.831975	0.968654	1.08406	1.24642	1.42004	1.60443	1.81123	2.05957	2.34007	2.5538	2.86456	3.36677	3.90952	4.96094	14.2449
0	0.101953	0.147519	0.223875	0.248047	0.30281	0.350791	0.420364	0.496094	0.55465	0.652819	0.725816	0.831975	0.968654	1.08511	1.24803	1.4206	1.60503	1.81399	2.0599	2.34007	2.5538	2.86607	3.3673	3.91281	4.96094	15.0145
0	0.101953	0.147633	0.224005	0.248047	0.30281	0.350791	0.420364	0.496094	0.55465	0.652819	0.727043	0.832658	0.968654	1.08594	1.24852	1.42112	1.60506	1.81612	2.06395	2.34007	2.5538	2.86667	3.36765	3.9153	4.96713	15.0881
0	0.101953	0.1486	0.224072	0.248047	0.30281	0.350791	0.420708	0.496094	0.55465	0.652819	0.727553	0.833877	0.968654	1.08771	1.25087	1.42125	1.60839	1.81655	2.06421	2.34007	2.55629	2.87026	3.36916	3.92197	4.96713	15.3869
0	0.101953	0.148982	0.224416	0.248047	0.30281	0.350791	0.421084	0.496094	0.55465	0.652819	0.727727	0.835902	0.968654	1.08893	1.2557	1.4217	1.6096	1.81792	2.06541	2.34267	2.55791	2.87118	3.37173	3.92197	4.98568	15.4706
0	0.101953	0.149146	0.224537	0.248047	0.30281	0.350791	0.421935	0.496094	0.55465	0.655868	0.728367	0.837379	0.968654	1.08921	1.25754	1.42292	1.61015	1.81856	2.06614	2.34388	2.56047	2.87156	3.3738	3.92197	4.99185	15.5342
0	0.101953	0.149235	0.224975	0.248047	0.30281	0.350791	0.422861	0.496094	0.55465	0.655939	0.729267	0.839844	0.968977	1.09113	1.258	1.42303	1.61025	1.82147	2.06935	2.34542	2.56247	2.87533	3.3738	3.92197	4.99219	15.9562
0	0.101953	0.149273	0.227358	0.248047	0.30281	0.350791	0.423274	0.496094	0.55465	0.655939	0.730096	0.839844	0.974557	1.09174	1.25812	1.424	1.61155	1.82216	2.07089	2.34544	2.56841	2.87684	3.3738	3.92197	5.00936	16.0024
0	0.101953	0.14966	0.227974	0.248047	0.30281	0.350791	0.424077	0.496094	0.55465	0.655939	0.735194	0.840727	0.974938	1.0918	1.25977	1.42475	1.61202	1.8229	2.07401	2.34955	2.56986	2.87923	3.37383	3.92197	5.01773	16.0848
0	0.101953	0.149942	0.227974	0.248047	0.30281	0.350791	0.424113	0.496094	0.55465	0.655939	0.737537	0.840727	0.975695	1.0918	1.26356	1.42559	1.61233	1.82325	2.07511	2.35268	2.57444	2.88111	3.37845	3.92197	5.05009	16.1078
0	0.101953	0.150147	0.227974	0.248047	0.30281	0.350791	0.427049	0.496183	0.55465	0.655939	0.74116	0.840835	0.978879	1.0925	1.2648	1.42762	1.61329	1.82377	2.08471	2.35318	2.57677	2.88433	3.3846	3.92197	5.05918	16.123
0	0.101953	0.150466	0.227974	0.248047	0.303102	0.350791	0.427541	0.496756	0.55465	0.658052	0.741827	0.840934	0.981414	1.0926	1.2648	1.42802	1.61329	1.82564	2.09214	2.35318	2.57862	2.88713	3.39038	3.92197	5.05918	16.2201
0	0.101953	0.150528	0.227974	0.248047	0.304307	0.350791	0.427871	0.498063	0.55465	0.65865	0.74223	0.841197	0.983012	1.09351	1.2648	1.43038	1.61396	1.82658	2.09284	2.35318	2.58403	2.8927	3.39447	3.92197	5.05918	16.3052
0	0.101953	0.150915	0.227974	0.248047	0.305191	0.350791	0.428057	0.499253	0.55465	0.658857	0.74223	0.842834	0.983012	1.09502	1.2648	1.43098	1.61601	1.82908	2.09362	2.35318	2.5865	2.8927	3.4019	3.92197	5.06993	16.5524
0	0.101953	0.151463	0.227974	0.248047	0.305859	0.350791	0.428083	0.499515	0.55465	0.66233	0.74223	0.843146	0.983553	1.09502	1.2648	1.43115	1.61713	1.82956	2.10108	2.35506	2.58908	2.8927	3.40456	3.92613	5.0895	16.5524
0	0.101953	0.151615	0.227974	0.248047	0.305859	0.350791	0.428238	0.49961	0.55465	0.664217	0.74223	0.844033	0.988554	1.09651	1.2648	1.4334	1.61784	1.83	2.10124	2.35595	2.58957	2.8927	3.40926	3.93806	5.1076	17.0161
0	0.101953	0.151703	0.227974	0.248047	0.305859	0.350791	0.428238	0.499927	0.55465	0.66423	0.743066	0.844033	0.989283	1.09675	1.2648	1.43671	1.61894	1.83026	2.10182	2.35853	2.58969	2.8927	3.41717	3.94573	5.11362	17.1026
0	0.101953	0.152352	0.227974	0.248047	0.305859	0.350791	0.428238	0.499972	0.55465	0.665617	0.744141	0.845366	0.992188	1.09694	1.2648	1.44093	1.6191	1.83184	2.10212	2.36098	2.58969	2.8927	3.41831	3.95027	5.11362	17.135
0	0.101953	0.152366	0.227974	0.248047	0.305859	0.350791	0.428238	0.500411	0.55465	0.667841	0.744141	0.847158	0.992188	1.09729	1.2648	1.44134	1.61924	1.83234	2.10273	2.36619	2.59125	2.8927	3.43063	3.96509	5.11362	17.2459
0	0.101953	0.152549	0.227974	0.248047	0.305859	0.350791	0.428238	0.50151	0.55465	0.667887	0.744141	0.852151	0.992188	1.09779	1.2648	1.44183	1.62066	1.8325	2.10347	2.36878	2.59561	2.90197	3.43077	3.96559	5.17937	17.2727
0	0.101953	0.152682	0.227974	0.248047	0.305859	0.350791	0.428238	0.502943	0.55465	0.667887	0.744141	0.854126	0.992188	1.09806	1.2648	1.4432	1.62072	1.83256	2.10475	2.36963	2.59713	2.90331	3.43186	3.96875	5.17937	17.5956
0	0.101953	0.152852	0.227974	0.248047	0.305859	0.350791	0.428238	0.503906	0.55465	0.667887	0.744141	0.854822	0.992188	1.09807	1.2648	1.44609	1.62671	1.83295	2.10475	2.37518	2.59932	2.9111	3.43438	3.96875	5.20898	17.7488
0	0.101953	0.15291	0.227974	0.248047	0.305859	0.350791	0.428238	0.503906	0.55465	0.667887	0.744141	0.856476	0.992188	1.09981	1.2648	1.44635	1.62939	1.83351	2.10475	2.37697	2.60071	2.92017	3.43439	3.96875	5.21489	17.7575
0	0.101953	0.152919	0.227974	0.248047	0.305859	0.350791	0.428238	0.504164	0.55465	0.667887	0.744141	0.861397	0.992188	1.10279	1.2648	1.44635	1.63127	1.83507	2.10475	2.38221	2.60161	2.92178	3.44217	3.96875	5.23748	17.868
0	0.101953	0.152966	0.227974	0.248047	0.305859	0.350791	0.428238	0.50445	0.558196	0.667887	0.744141	0.861431	0.992188	1.10464	1.2648	1.44635	1.63127	1.83799	2.10475	2.38247	2.60193	2.92733	3.44975	3.96875	5.25602	18.1685
0	0.101953	0.153026	0.227974	0.248047	0.305859	0.350791	0.428238	0.506296	0.559561	0.667887	0.744141	0.862138	0.992188	1.1058	1.2648	1.44635	1.63176	1.84152	2.10475	2.38319	2.60567	2.93065	3.45104	3.97648	5.26187	18.231
0	0.101953	0.153042	0.227974	0.248047	0.305859	0.350791	0.428676	0.50748	0.560017	0.667887	0.744141	0.862368	0.992188	1.1093	1.2648	1.44635	1.63257	1.84324	2.10475	2.38466	2.60635	2.93367	3.45189	3.97989	5.26187	18.5903
0	0.101953	0.153922	0.227974	0.248047	0.305859	0.350791	0.429162	0.508147	0.5606	0.667887	0.744141	0.863186	0.992188	1.1093	1.2648	1.44635	1.63286	1.84456	2.10562	2.38512	2.61004	2.94142	3.45489	3.99506	5.27884	18.7796
0	0.101953	0.154117	0.227974	0.248047	0.305859	0.350791	0.430464	0.508558	0.562174	0.667887	0.744141	0.864672	0.992188	1.1093	1.2648	1.44635	1.63373	1.84487	2.10651	2.38599	2.61124	2.94986	3.45489	3.99964	5.28431	18.7796
0	0.101953	0.154685	0.227974	0.248047	0.305859	0.350791	0.4307	0.508635	0.562504	0.667887	0.744141	0.864672	0.992188	1.1093	1.2648	1.44635	1.63426	1.84572	2.10939	2.38669	2.61452	2.95205	3.45489	3.99964	5.30264	18.7878
0	0.101953	0.154852	0.227974	0.248047	0.305859	0.350791	0.432541	0.509461	0.562849	0.667887	0.744141	0.864863	0.992188	1.1093	1.2648	1.44635	1.63503	1.84594	2.11058	2.38922	2.6157	2.95879	3.45489	3.99964	5.32579	18.896
0	0.101953	0.154898	0.227974	0.248047	0.305859	0.350791	0.43255	0.50949	0.562976	0.667887	0.744141	0.868073	0.992188	1.1093	1.2648	1.44635	1.64217	1.84645	2.11405	2.38936	2.62181	2.96095	3.47266	4.00732	5.32579	18.924
0	0.101953	0.154993	0.227974	0.248047	0.305859	0.350791	0.43255	0.509766	0.563384	0.667887	0.744141	0.868164	0.992188	1.1093	1.2648	1.44635	1.64375	1.84714	2.11515	2.39205	2.62384	2.96338	3.47266	4.00732	5.34309	18.9636
0	0.101953	0.155032	0.227974	0.248047	0.307165	0.350791	0.43255	0.509766	0.563384	0.667887	0.744141	0.868687	0.993644	1.1093	1.2648	1.44635	1.64808	1.84888	2.11588	2.39223	2.62403	2.96348	3.47266	4.00732	5.34309	18.9992
0	0.101953	0.155487	0.227974	0.248047	0.307194	0.350791	0.432934	0.509766	0.563997	0.668786	0.744141	0.869649	0.995379	1.11199	1.2648	1.44635	1.64931	1.84932	2.11931	2.39241	2.62443	2.96927	3.47266	4.00732	5.44009	19.0424
0	0.101953	0.155526	0.228983	0.248047	0.30788	0.350791	0.433136	0.509766	0.564219	0.671253	0.744141	0.87002	0.997822	1.11341	1.2648	1.44635	1.6508	1.85148	2.12083	2.39717	2.62693	2.97656	3.4815	4.00732	5.45703	19.0803
0	0.102424	0.155695	0.229973	0.248047	0.308213	0.351653	0.435153	0.509766	0.567738	0.671875	0.744141	0.870184	0.99833	1.11406	1.2648	1.44635	1.65299	1.85157	2.12328	2.39819	2.62775	2.97656	3.48577	4.02626	5.45703	19.1184
0	0.102743	0.156508	0.231165	0.248047	0.30991	0.352856	0.437766	0.509766	0.568036	0.671875	0.744141	0.870705	0.998821	1.11511	1.2648	1.44635	1.65362	1.85186	2.12611	2.39873	2.62983	2.97656	3.48815	4.03471	5.45703	19.1382
0	0.102945	0.156567	0.231569	0.248047	0.311259	0.353244	0.438912	0.509766	0.568165	0.674807	0.744141	0.870885	0.999909	1.11539	1.26563	1.44635	1.65374	1.85315	2.1272	2.40012	2.63087	2.98022	3.4888	4.03791	5.46267	19.1429
0	0.103314	0.156635	0.231676	0.248047	0.311283	0.353255	0.439352	0.509766	0.568951	0.675633	0.744141	0.871088	0.999909	1.11725	1.26771	1.44635	1.6614	1.85604	2.13032	2.40269	2.63422	2.98688	3.49211	4.03791	5.49075	19.2337
0	0.103466	0.157141	0.23343	0.248047	0.31245	0.353503	0.440949	0.509766	0.569123	0.676461	0.744141	0.871572	0.999909	1.12234	1.27096	1.44635	1.66191	1.85674	2.13378	2.40297	2.63677	2.98688	3.49775	4.03791	5.5465	19.2636
0	0.103485	0.157293	0.233814	0.248047	0.313194	0.355526	0.442177	0.509766	0.57078	0.677095	0.744141	0.871939	0.999909	1.12308	1.27311	1.44635	1.66395	1.85745	2.13378	2.40342	2.64122	2.98704	3.50791	4.03791	5.5465	19.3047
0	0.103653	0.157654	0.234814	0.248047	0.313265	0.355557	0.444312	0.509766	0.571104	0.677104	0.744141	0.876823	0.999909	1.12308	1.27329	1.44635	1.66395	1.85986	2.13378	2.40597	2.64427	2.99309	3.50791	4.03791	5.57416	19.354
0	0.104456	0.158696	0.235374	0.248047	0.313481	0.356316	0.444743	0.509766	0.571294	0.677104	0.744141	0.876978	0.999909	1.12308	1.27373	1.44635	1.66395	1.86203	2.13378	2.41454	2.64697	2.99462	3.50791	4.03791	5.6069	19.3688
0	0.10521	0.15876	0.235469	0.248047	0.314511	0.356316	0.446345	0.509766	0.571541	0.677928	0.744141	0.876978	0.999909	1.12308	1.27492	1.44635	1.66395	1.86275	2.13378	2.41466	2.64927	2.99716	3.50791	4.05472	5.65634	19.4697
0	0.105258	0.158819	0.236395	0.248047	0.314783	0.357229	0.44658	0.509766	0.573799	0.678094	0.748751	0.876978	0.999909	1.12323	1.27549	1.44635	1.66395	1.86448	2.13378	2.41608	2.65296	2.99716	3.50791	4.06725	5.71047	19.569
0	0.105437	0.158853	0.236649	0.248047	0.315137	0.358284	0.447173	0.509766	0.574762	0.678234	0.748822	0.876978	1.00051	1.12367	1.2769	1.44635	1.66417	1.86448	2.13378	2.41911	2.65402	2.99716	3.50791	4.06827	5.72661	19.6396
0	0.105834	0.160029	0.237252	0.248047	0.315574	0.362166	0.447173	0.509766	0.576734	0.67868	0.749412	0.876978	1.00062	1.12442	1.27706	1.44635	1.66476	1.86533	2.13378	2.41929	2.65965	2.99716	3.50791	4.06827	5.74678	19.7832
0	0.106134	0.160119	0.237544	0.248047	0.316194	0.362699	0.447173	0.509766	0.576734	0.679358	0.751011	0.876978	1.0009	1.12611	1.27908	1.44635	1.66777	1.86591	2.13378	2.41966	2.66096	2.99716	3.50791	4.07415	5.7534	19.8205
0	0.10629	0.160245	0.237544	0.248047	0.316992	0.365104	0.447173	0.509766	0.576734	0.679739	0.751179	0.876978	1.00113	1.12942	1.27921	1.44831	1.66929	1.86614	2.13378	2.4281	2.67155	2.99716	3.50791	4.08004	5.76942	19.9751
0	0.106436	0.160933	0.237544	0.248047	0.317159	0.36567	0.447173	0.509766	0.576734	0.68148	0.751179	0.876978	1.00188	1.13024	1.27921	1.44872	1.67015	1.87012	2.13378	2.42999	2.67155	2.99716	3.50791	4.09089	5.79071	20.2139
0	0.106796	0.160939	0.237544	0.248047	0.317383	0.366899	0.447173	0.509766	0.576734	0.682069	0.751179	0.876978	1.00209	1.13364	1.27922	1.4499	1.67286	1.87025	2.13378	2.43131	2.67155	2.99716	3.50791	4.09089	5.80663	20.2367
0	0.106884	0.161193	0.237544	0.248047	0.320163	0.367179	0.447173	0.509766	0.577101	0.68347	0.751179	0.876978	1.00318	1.13384	1.2808	1.45029	1.67305	1.87158	2.13378	2.43201	2.67155	3.00759	3.51075	4.10499	5.89601	20.3111
0	0.10755	0.161237	0.237544	0.248047	0.320209	0.367597	0.447173	0.510857	0.577929	0.683922	0.751179	0.876978	1.00327	1.13525	1.28086	1.45036	1.67409	1.87221	2.13378	2.43364	2.67155	3.01762	3.5144	4.10591	5.89601	20.4304
0	0.107566	0.161416	0.237544	0.248047	0.320784	0.367597	0.447173	0.510857	0.578716	0.683922	0.751729	0.876978	1.00412	1.13717	1.28377	1.45166	1.67587	1.87301	2.13448	2.43499	2.67155	3.02027	3.51533	4.11923	5.96345	20.4304
0	0.108791	0.161561	0.237544	0.248047	0.321333	0.367597	0.447173	0.510857	0.579667	0.685381	0.751816	0.876978	1.00546	1.13813	1.28599	1.45322	1.67604	1.87373	2.13473	2.44298	2.67155	3.02172	3.51723	4.15763	5.97376	20.4304
0	0.109136	0.161724	0.237544	0.248047	0.321341	0.367597	0.447173	0.510857	0.580067	0.689156	0.754405	0.876978	1.00632	1.13904	1.28607	1.45691	1.67648	1.87384	2.13604	2.44298	2.67155	3.0278	3.52361	4.15802	5.97376	20.6833
0	0.109193	0.161835	0.237544	0.248047	0.321421	0.367597	0.447173	0.510857	0.580277	0.689969	0.754405	0.876978	1.00781	1.13987	1.28628	1.46162	1.67667	1.87392	2.13792	2.44298	2.67155	3.0278	3.52465	4.15802	5.99432	20.6952
0	0.109247	0.162091	0.237544	0.248047	0.322404	0.367597	0.447173	0.510857	0.580639	0.690051	0.754405	0.876978	1.00791	1.13987	1.28639	1.46181	1.67716	1.87974	2.13953	2.44298	2.67155	3.0278	3.52541	4.15802	6.00458	20.9552
0	0.109285	0.162158	0.237544	0.248047	0.322404	0.367597	0.447173	0.510857	0.580901	0.691211	0.754405	0.876978	1.01106	1.13987	1.28673	1.46256	1.67718	1.88062	2.13961	2.44792	2.67228	3.03043	3.52541	4.15802	6.03524	21.1059
0	0.110036	0.162481	0.237544	0.248047	0.322404	0.367597	0.448798	0.511166	0.582367	0.691221	0.754405	0.877034	1.01131	1.13987	1.28779	1.46274	1.67732	1.88115	2.14167	2.45031	2.67411	3.03669	3.52541	4.15802	6.04034	21.6952
0	0.110598	0.162958	0.238494	0.248047	0.322404	0.367597	0.449842	0.511362	0.583561	0.691424	0.754405	0.877034	1.01131	1.14082	1.28858	1.46303	1.67751	1.88468	2.14548	2.45108	2.67643	3.03745	3.52541	4.17268	6.10115	21.7222
0	0.110755	0.163218	0.238497	0.248047	0.322404	0.367597	0.450256	0.511362	0.584175	0.691641	0.756414	0.877034	1.01131	1.14206	1.28983	1.46428	1.6781	1.8869	2.14701	2.45141	2.68061	3.04428	3.52541	4.19783	6.20024	21.9588
0	0.11122	0.163347	0.239031	0.248047	0.322404	0.367597	0.45045	0.511362	0.584953	0.692553	0.757189	0.877034	1.0119	1.14231	1.29066	1.46675	1.67969	1.88703	2.15088	2.45554	2.68254	3.0454	3.53241	4.2168	6.22098	22.3215
0	0.111312	0.163711	0.239086	0.248047	0.322404	0.367706	0.45054	0.511362	0.58502	0.692729	0.757284	0.877034	1.01413	1.14344	1.29484	1.46736	1.67969	1.88742	2.1522	2.45554	2.68304	3.04888	3.53491	4.2168	6.22098	22.6322
0	0.111631	0.16405	0.239154	0.248047	0.322404	0.368326	0.450744	0.511362	0.585721	0.693583	0.757749	0.879084	1.01479	1.14344	1.29614	1.46831	1.68435	1.8883	2.15283	2.45554	2.68304	3.05093	3.53669	4.2168	6.27514	22.7081
0	0.111788	0.164055	0.239311	0.248047	0.322404	0.368839	0.45145	0.511362	0.587891	0.694691	0.757861	0.879552	1.01479	1.14344	1.29702	1.46913	1.68498	1.88907	2.15578	2.45894	2.68304	3.06606	3.54584	4.2168	6.32398	22.8257
0	0.111793	0.164924	0.239583	0.248047	0.322404	0.37015	0.45227	0.511362	0.587891	0.695193	0.759265	0.880078	1.01479	1.14344	1.29795	1.46913	1.68679	1.88907	2.15618	2.45936	2.68304	3.06817	3.54733	4.2168	6.3531	22.8419
0	0.11339	0.165778	0.239749	0.248047	0.322404	0.370481	0.45227	0.511362	0.590479	0.696353	0.759356	0.881717	1.01566	1.14797	1.29889	1.47068	1.6868	1.88907	2.16239	2.46249	2.6849	3.07165	3.55149	4.2168	6.35794	22.9815
0	0.113671	0.166321	0.240095	0.248047	0.322404	0.370552	0.45227	0.512753	0.590594	0.700676	0.759996	0.882031	1.01748	1.14952	1.29972	1.47428	1.68712	1.8899	2.16624	2.46377	2.68603	3.07519	3.55149	4.2222	6.43967	23.5697
0	0.113838	0.166632	0.240122	0.248047	0.322744	0.370755	0.45227	0.512859	0.592473	0.701583	0.760511	0.882913	1.01887	1.15207	1.29976	1.47499	1.6873	1.89022	2.16659	2.46495	2.68796	3.07599	3.55149	4.22409	6.43967	23.6946
0	0.114056	0.166831	0.240249	0.248047	0.324458	0.37207	0.45227	0.513152	0.59285	0.701583	0.761366	0.883076	1.01953	1.15347	1.30111	1.47879	1.68899	1.89065	2.16781	2.46511	2.69167	3.07728	3.55149	4.22409	6.67426	24.0721
0	0.114295	0.167205	0.240275	0.248047	0.325435	0.37207	0.45227	0.513154	0.59336	0.701583	0.76269	0.883787	1.02015	1.157	1.30193	1.48276	1.69135	1.89123	2.16979	2.46772	2.6968	3.08466	3.55149	4.22409	6.67887	24.0925
0	0.114329	0.167399	0.240568	0.248047	0.326163	0.37207	0.45227	0.515014	0.593859	0.701583	0.764575	0.88609	1.02053	1.15894	1.30275	1.48535	1.69328	1.89184	2.16983	2.46846	2.70067	3.09722	3.55149	4.22409	6.7749	24.3402
0	0.11486	0.167429	0.240684	0.248047	0.32661	0.37207	0.45227	0.516855	0.593859	0.701583	0.76676	0.887144	1.02162	1.16009	1.30393	1.48541	1.69342	1.89196	2.17245	2.47352	2.70319	3.09968	3.55223	4.22409	6.89642	24.4273
0	0.114931	0.167432	0.240687	0.248047	0.327814	0.37207	0.45227	0.516859	0.593859	0.701583	0.769672	0.887788	1.02272	1.16132	1.30424	1.48584	1.69419	1.89346	2.17393	2.47396	2.70326	3.10359	3.5684	4.22409	6.90979	24.4914
0	0.115027	0.16754	0.240774	0.248047	0.328123	0.37207	0.45227	0.518392	0.593859	0.701583	0.771782	0.88798	1.02272	1.16244	1.3076	1.48601	1.69721	1.89416	2.1751	2.47574	2.70632	3.10802	3.57409	4.23175	7.05518	24.5052
0	0.115218	0.167969	0.24094	0.248047	0.328254	0.37207	0.453544	0.518925	0.594387	0.701583	0.774298	0.891952	1.02272	1.16277	1.30761	1.4873	1.69722	1.89492	2.17532	2.47633	2.70707	3.10802	3.57567	4.24588	7.05518	24.5579
0	0.115515	0.167969	0.24109	0.248047	0.328509	0.37207	0.453679	0.519861	0.594484	0.701583	0.774298	0.891954	1.02272	1.16345	1.30955	1.48821	1.69745	1.89719	2.17552	2.47825	2.70741	3.11321	3.57707	4.26756	7.10298	24.5679
0	0.115553	0.167969	0.241105	0.248047	0.328559	0.37207	0.455317	0.519861	0.594484	0.701583	0.774298	0.892664	1.02272	1.16473	1.30959	1.48828	1.69753	1.89942	2.17678	2.47858	2.70878	3.13471	3.57738	4.26756	7.10731	24.8369
0	0.115928	0.167969	0.2412	0.248047	0.328598	0.37207	0.455948	0.519861	0.594484	0.701583	0.774298	0.893317	1.02272	1.1651	1.30964	1.48828	1.69879	1.90211	2.18171	2.48047	2.71099	3.13674	3.57738	4.26756	7.15906	25.0834
0	0.115989	0.167969	0.242233	0.248047	0.329426	0.37207	0.455948	0.519861	0.594484	0.701583	0.77446	0.894346	1.02272	1.16675	1.31025	1.48828	1.70006	1.903	2.18603	2.48047	2.71184	3.13703	3.5899	4.26756	7.19763	25.1165
0	0.11618	0.167969	0.242456	0.248047	0.330076	0.37207	0.455948	0.519861	0.594484	0.701583	0.776614	0.894346	1.02272	1.16831	1.31188	1.48828	1.70177	1.90314	2.18639	2.48047	2.71492	3.13757	3.59577	4.26756	7.2445	25.2009
0	0.116218	0.167969	0.243027	0.248047	0.330265	0.37207	0.455948	0.519861	0.594484	0.701583	0.778514	0.894346	1.02272	1.16834	1.31217	1.48828	1.70301	1.90357	2.18782	2.48047	2.7174	3.13757	3.60018	4.26756	7.34571	25.2106
0	0.116485	0.167969	0.243926	0.248047	0.33183	0.37207	0.455948	0.519861	0.594484	0.701583	0.779202	0.894346	1.02272	1.16977	1.31219	1.48828	1.70822	1.9036	2.19145	2.48047	2.71805	3.13757	3.60436	4.28195	7.37496	25.302
0	0.116567	0.167969	0.244382	0.248047	0.333204	0.37207	0.455948	0.519861	0.594484	0.701583	0.779236	0.894346	1.02272	1.17003	1.31337	1.48828	1.70875	1.90541	2.19244	2.48047	2.71815	3.13757	3.60563	4.28195	7.46205	26.2754
0	0.116926	0.167969	0.244669	0.248047	0.333816	0.37207	0.456236	0.519861	0.600263	0.701583	0.78061	0.894346	1.02272	1.17003	1.3139	1.48828	1.70901	1.90574	2.1938	2.48047	2.72072	3.15712	3.60614	4.33195	7.49906	26.57
0	0.116981	0.167969	0.244809	0.248047	0.335698	0.37207	0.456344	0.519861	0.601611	0.701583	0.783489	0.894346	1.02272	1.17003	1.31423	1.48828	1.70945	1.90624	2.19546	2.48047	2.72195	3.15712	3.60748	4.33195	7.54405	26.6567
0	0.117122	0.167969	0.244892	0.248047	0.335938	0.37207	0.457503	0.520858	0.602007	0.701583	0.784393	0.894346	1.02272	1.17003	1.31582	1.48828	1.71232	1.907	2.19646	2.48047	2.72623	3.15907	3.61162	4.33195	7.57254	27.1189
0	0.117547	0.168246	0.245336	0.248047	0.335938	0.37207	0.457523	0.522484	0.602515	0.701583	0.784393	0.894346	1.02272	1.17079	1.31662	1.48828	1.71567	1.90742	2.19997	2.48047	2.72723	3.16595	3.61554	4.33195	7.59283	27.2919
0	0.118055	0.168419	0.2457	0.248047	0.335938	0.37207	0.458404	0.522489	0.604315	0.701583	0.784393	0.894346	1.02272	1.17081	1.3179	1.48828	1.71683	1.90807	2.20504	2.48047	2.72852	3.16969	3.61565	4.33905	7.70145	27.4033
0	0.118157	0.16866	0.245926	0.248047	0.335938	0.37207	0.459855	0.522588	0.60459	0.701583	0.784393	0.894346	1.02272	1.17469	1.31839	1.48828	1.7204	1.91084	2.2061	2.48047	2.72852	3.17467	3.62053	4.33905	7.7651	27.4571
0	0.118213	0.168825	0.245963	0.248047	0.335938	0.37207	0.460286	0.522726	0.604967	0.701583	0.784393	0.894346	1.02272	1.17474	1.31839	1.48828	1.72133	1.91102	2.21096	2.48047	2.73157	3.17655	3.62826	4.36391	7.78883	27.7325
0	0.118582	0.168922	0.248047	0.248047	0.335938	0.37207	0.460474	0.523304	0.60562	0.701583	0.784393	0.894346	1.02272	1.17571	1.31839	1.489	1.72274	1.91342	2.21264	2.48047	2.7316	3.17655	3.63218	4.38139	7.83216	27.7779
0	0.118636	0.169113	0.248047	0.248047	0.335973	0.37207	0.461881	0.523507	0.60562	0.701583	0.784393	0.894346	1.02272	1.17578	1.31872	1.49001	1.72322	1.91621	2.21661	2.48047	2.73544	3.17655	3.63806	4.3954	7.92586	27.8631
0	0.11877	0.169552	0.248047	0.248047	0.336519	0.37207	0.46212	0.52366	0.605817	0.701583	0.784393	0.894346	1.02272	1.17578	1.32041	1.49254	1.72605	1.91813	2.21704	2.48047	2.73977	3.17655	3.64564	4.41635	7.92586	28.8727
0	0.118772	0.169763	0.248047	0.248047	0.337001	0.37207	0.463754	0.526187	0.606632	0.701583	0.784393	0.894346	1.02272	1.17578	1.32259	1.49297	1.72676	1.92009	2.2186	2.48047	2.73999	3.17655	3.64938	4.41635	7.94137	29.343
0	0.118772	0.17009	0.248047	0.248047	0.337354	0.37207	0.466392	0.526187	0.606708	0.701583	0.784393	0.894401	1.02272	1.17659	1.32276	1.49487	1.72676	1.92037	2.2186	2.48047	2.74305	3.17655	3.65151	4.41635	7.99927	30.5057
0	0.118772	0.170154	0.248047	0.248047	0.337997	0.37207	0.466393	0.526187	0.608933	0.701665	0.784393	0.89465	1.02272	1.17659	1.3242	1.4953	1.727	1.92453	2.2186	2.48047	2.74703	3.18608	3.65454	4.44251	8.00696	31.2362
0	0.118772	0.170499	0.248047	0.248047	0.338392	0.37207	0.467371	0.526187	0.611038	0.702494	0.784393	0.895509	1.02371	1.17659	1.3246	1.49765	1.72777	1.92609	2.22032	2.48047	2.75379	3.19416	3.6566	4.44314	8.03381	32.1142
0	0.118772	0.171212	0.248047	0.248047	0.338592	0.37207	0.467387	0.526187	0.611205	0.702992	0.784393	0.897811	1.02454	1.17766	1.32494	1.49768	1.72826	1.92887	2.22928	2.48047	2.75444	3.19903	3.65708	4.46257	8.03381	32.3984
0	0.118772	0.17165	0.248047	0.248047	0.338733	0.37207	0.471037	0.526187	0.611415	0.703253	0.784393	0.89854	1.02481	1.17872	1.32561	1.4979	1.72994	1.93017	2.23196	2.48137	2.75555	3.20404	3.6592	4.47173	8.03381	32.7666
0	0.118772	0.172054	0.248047	0.248047	0.339761	0.37207	0.471113	0.526187	0.611415	0.703456	0.784393	0.898919	1.02516	1.17878	1.32742	1.49858	1.7309	1.93133	2.23242	2.48164	2.75632	3.20538	3.66237	4.47173	8.09865	32.8669
0	0.118772	0.172063	0.248047	0.248047	0.340002	0.37207	0.472968	0.526327	0.611719	0.703958	0.784393	0.901085	1.02516	1.17878	1.3275	1.49878	1.73128	1.93205	2.23242	2.48407	2.76106	3.22461	3.6708	4.47173	8.1592	33.2087
0	0.118772	0.172076	0.248047	0.248047	0.340008	0.373501	0.473774	0.526821	0.6155	0.705994	0.784393	0.901675	1.02516	1.18177	1.32791	1.50235	1.73138	1.93506	2.23242	2.4868	2.76257	3.22461	3.68748	4.47173	8.18555	33.5231
0	0.118772	0.173006	0.248047	0.248047	0.340181	0.374366	0.473891	0.527829	0.615727	0.706675	0.784393	0.902753	1.02621	1.18223	1.32862	1.5039	1.73138	1.93731	2.23242	2.49104	2.76278	3.22461	3.68748	4.47173	8.20057	34.7266
0	0.118772	0.173313	0.248047	0.248047	0.342134	0.374917	0.474355	0.529777	0.615972	0.709594	0.784393	0.902904	1.02763	1.18245	1.3304	1.50576	1.7332	1.93731	2.23242	2.49114	2.76395	3.22461	3.68748	4.47173	8.2193	35.5547
0	0.118772	0.173406	0.248047	0.248047	0.342136	0.375055	0.475087	0.531164	0.616356	0.710689	0.784393	0.902904	1.02832	1.18419	1.33082	1.50678	1.7345	1.93731	2.23242	2.49202	2.76913	3.22461	3.68748	4.47173	8.2193	38.2869
0	0.118772	0.173502	0.248047	0.248047	0.344098	0.37559	0.475087	0.531164	0.618084	0.712	0.784393	0.902904	1.02837	1.18477	1.33213	1.50881	1.7363	1.93731	2.23242	2.49284	2.7707	3.22461	3.68748	4.47173	8.24546	39.0128
0	0.118921	0.173684	0.248047	0.248401	0.344582	0.37559	0.475293	0.531164	0.619542	0.712631	0.784393	0.902904	1.03566	1.18606	1.33577	1.50881	1.73633	1.93731	2.23242	2.49284	2.77325	3.2295	3.68748	4.47173	8.31975	40.9871
0	0.119501	0.173845	0.248047	0.248408	0.345235	0.37559	0.475573	0.531164	0.61974	0.712631	0.784393	0.902904	1.03718	1.18772	1.33577	1.50881	1.73633	1.93731	2.23242	2.49284	2.77325	3.23115	3.69326	4.4799	8.36768	42.78
0	0.119931	0.174273	0.248047	0.248416	0.345264	0.37559	0.476318	0.531164	0.620117	0.712631	0.784393	0.903323	1.03835	1.19167	1.33577	1.50881	1.73633	1.93731	2.23242	2.49284	2.77325	3.23414	3.70596	4.48942	8.43359	44.8252
0	0.120082	0.174327	0.248047	0.248627	0.346276	0.37559	0.478663	0.531164	0.620117	0.713269	0.784393	0.903681	1.03883	1.19333	1.33577	1.50881	1.73633	1.93731	2.23273	2.49284	2.77325	3.23414	3.7207	4.49232	8.43359	45.4901
0	0.120391	0.174501	0.248047	0.248804	0.346276	0.37559	0.479253	0.531384	0.620117	0.713672	0.784393	0.904141	1.03883	1.19333	1.33577	1.50881	1.73633	1.93731	2.23463	2.49284	2.77325	3.23414	3.7207	4.49645	8.43724	45.9048
0	0.120892	0.174616	0.248047	0.249772	0.346276	0.37559	0.479964	0.532828	0.620117	0.713672	0.784393	0.9044	1.03883	1.19364	1.33577	1.50881	1.73633	1.93731	2.23991	2.49284	2.77325	3.23414	3.7207	4.52343	8.46636	46.5754
0	0.12103	0.1747	0.248047	0.250075	0.346276	0.37559	0.480849	0.534239	0.620117	0.713672	0.784393	0.904539	1.03883	1.19364	1.33577	1.50881	1.73633	1.93731	2.24616	2.49284	2.77325	3.23494	3.7207	4.52643	8.46636	47.0453
0	0.121232	0.174794	0.248047	0.25136	0.346276	0.37559	0.481742	0.534318	0.620117	0.713672	0.784903	0.904539	1.03972	1.19418	1.33577	1.50881	1.73633	1.93731	2.24616	2.49284	2.77325	3.23573	3.7207	4.52643	8.54233	47.9251
0	0.121284	0.175326	0.248047	0.251533	0.346365	0.37559	0.482416	0.535006	0.620117	0.715007	0.785749	0.904539	1.0401	1.1942	1.33577	1.50881	1.73633	1.93731	2.24616	2.49284	2.77325	3.24193	3.7207	4.5565	8.55312	48.0059
0	0.121371	0.175396	0.248047	0.251592	0.347359	0.37559	0.483135	0.535137	0.620117	0.71562	0.786299	0.904539	1.04157	1.19587	1.33577	1.50881	1.73633	1.93731	2.24654	2.49284	2.77325	3.24241	3.7207	4.56029	8.56391	48.1652
0	0.121591	0.175396	0.248047	0.251953	0.347365	0.37559	0.48362	0.535488	0.620117	0.71676	0.787221	0.904539	1.04171	1.19617	1.33577	1.50881	1.73633	1.93731	2.24729	2.49284	2.77325	3.24916	3.7207	4.57376	8.59618	48.2118
0	0.122043	0.175396	0.248047	0.251953	0.347574	0.376979	0.48366	0.536643	0.620117	0.717176	0.787812	0.904608	1.04184	1.19626	1.33577	1.50881	1.739	1.93731	2.2477	2.49284	2.77325	3.25368	3.72666	4.57376	8.61048	49.8963
0	0.122083	0.175396	0.248047	0.251953	0.347631	0.377144	0.483815	0.537762	0.620117	0.717354	0.789162	0.906321	1.04452	1.20247	1.33577	1.51061	1.73942	1.93731	2.24798	2.49284	2.77325	3.25587	3.72702	4.57376	8.73815	50.2826
0	0.122675	0.175396	0.248047	0.251953	0.347732	0.377739	0.485334	0.537762	0.620117	0.717494	0.789442	0.90843	1.04608	1.20608	1.33577	1.51067	1.7425	1.93731	2.25136	2.49284	2.77325	3.26108	3.72896	4.57376	8.7908	50.5845
0	0.122973	0.175396	0.248047	0.251953	0.348289	0.378051	0.485905	0.537762	0.620117	0.717563	0.789661	0.90843	1.04676	1.20647	1.33577	1.51405	1.74357	1.93733	2.25271	2.49379	2.77325	3.26255	3.72896	4.57376	8.93313	50.8647
0	0.123183	0.175396	0.248047	0.251953	0.348519	0.381544	0.486677	0.537762	0.620117	0.717563	0.78993	0.90843	1.04735	1.20677	1.33577	1.51405	1.74433	1.93846	2.25433	2.49393	2.77325	3.26255	3.72896	4.57376	9.08339	51.3463
0	0.123635	0.175396	0.248047	0.251953	0.348645	0.382812	0.486849	0.537762	0.620117	0.717563	0.790315	0.90843	1.04864	1.20808	1.33577	1.51564	1.74774	1.9391	2.25661	2.49575	2.77325	3.26255	3.72896	4.57376	9.14752	51.5854
0	0.123896	0.175396	0.248047	0.251953	0.348662	0.382937	0.487099	0.537762	0.620117	0.717563	0.792057	0.908457	1.04883	1.2097	1.33577	1.51591	1.75002	1.93911	2.25721	2.49598	2.77325	3.26255	3.72896	4.57766	9.14752	52.6526
0	0.124023	0.175396	0.248047	0.251953	0.348705	0.383945	0.489127	0.537762	0.620117	0.717563	0.792202	0.909299	1.04967	1.21124	1.33577	1.51655	1.7534	1.94097	2.25771	2.49649	2.77325	3.26258	3.73863	4.58671	9.17773	52.7005
0	0.124023	0.175396	0.248047	0.251953	0.348731	0.384105	0.48954	0.537906	0.620117	0.7187	0.792307	0.909829	1.04985	1.2123	1.33577	1.51713	1.75396	1.94146	2.25986	2.50077	2.77325	3.2703	3.73899	4.58814	9.18109	52.7967
0	0.124023	0.175396	0.248047	0.251953	0.349024	0.385309	0.489709	0.538808	0.620117	0.720811	0.793319	0.910464	1.05068	1.21388	1.33577	1.51843	1.75396	1.94189	2.2625	2.50139	2.77325	3.2725	3.74319	4.61394	9.18109	54.5551
0	0.124023	0.175396	0.248047	0.251953	0.349374	0.385893	0.489709	0.539979	0.620117	0.720917	0.794137	0.910957	1.0511	1.21492	1.33577	1.51909	1.75396	1.94276	2.26792	2.50166	2.77325	3.27356	3.74941	4.61394	9.20451	55.0686
0	0.124023	0.175396	0.248047	0.251953	0.349518	0.385989	0.489709	0.540031	0.620117	0.720917	0.794137	0.911108	1.05237	1.21579	1.33577	1.51998	1.75396	1.94355	2.26799	2.50239	2.77325	3.27529	3.75163	4.6339	9.20451	55.266
0	0.124023	0.175396	0.248047	0.251953	0.349548	0.386067	0.489709	0.540211	0.620117	0.720917	0.794137	0.911959	1.05237	1.21726	1.33577	1.5226	1.75396	1.94449	2.26902	2.50257	2.77325	3.27636	3.75363	4.6339	9.26115	55.39
0	0.124023	0.175396	0.248047	0.251953	0.349703	0.386139	0.489709	0.540598	0.620117	0.720917	0.794137	0.913534	1.05237	1.21789	1.33577	1.52443	1.75396	1.94563	2.27061	2.50258	2.77325	3.2878	3.75363	4.63719	9.2678	56.8379
0	0.124023	0.175396	0.248047	0.251953	0.350263	0.386947	0.489709	0.543977	0.620117	0.720917	0.794137	0.913718	1.05237	1.21838	1.33577	1.52458	1.75396	1.94603	2.27172	2.50966	2.77325	3.28846	3.75363	4.64775	9.34054	57.8125
0	0.124023	0.175396	0.248047	0.251953	0.350364	0.388952	0.489709	0.543983	0.620117	0.720917	0.794137	0.915474	1.05237	1.21842	1.33577	1.52479	1.75396	1.94618	2.27273	2.51066	2.78257	3.29494	3.77786	4.66038	9.38981	60.8625
0	0.124023	0.175396	0.248047	0.252402	0.350791	0.390786	0.490265	0.544499	0.620157	0.721326	0.794137	0.916719	1.05237	1.22008	1.33577	1.52766	1.75396	1.9471	2.27331	2.5115	2.78477	3.29767	3.77814	4.69478	9.42578	65.598
0	0.124023	0.175396	0.248047	0.252903	0.350791	0.390824	0.490288	0.546349	0.620157	0.72201	0.794137	0.916721	1.05237	1.22106	1.33577	1.52826	1.75396	1.94781	2.2742	2.51187	2.7935	3.29961	3.77814	4.69769	9.44534
0	0.124023	0.175396	0.248047	0.253035	0.350791	0.39167	0.490506	0.549034	0.620697	0.722461	0.794137	0.917578	1.05237	1.22149	1.33577	1.53029	1.75396	1.95106	2.27813	2.51392	2.79576	3.29966	3.77814	4.702	9.47786
0	0.124023	0.175396	0.248047	0.253065	0.350791	0.392197	0.490649	0.549034	0.622189	0.722461	0.794137	0.917578	1.05237	1.22185	1.33577	1.53229	1.75396	1.95462	2.27974	2.51449	2.79927	3.30794	3.77862	4.71289	9.49407
0	0.124023	0.175396	0.248047	0.253813	0.350791	0.392197	0.491227	0.549034	0.622961	0.722461	0.794137	0.918896	1.05237	1.22204	1.34033	1.53242	1.75396	1.95524	2.28234	2.51977	2.80305	3.30936	3.78118	4.71289	9.49407
0	0.124023	0.175396	0.248047	0.254072	0.350791	0.392197	0.492288	0.549034	0.623831	0.723175	0.794137	0.919264	1.05237	1.22283	1.34128	1.53358	1.75396	1.95804	2.28392	2.5227	2.80633	3.30936	3.79065	4.71289	9.52965
0	0.124023	0.175396	0.248047	0.254308	0.350791	0.392197	0.4932	0.549034	0.625491	0.723175	0.794137	0.919898	1.05237	1.22319	1.34229	1.53401	1.75396	1.95973	2.28439	2.5234	2.81687	3.30936	3.79439	4.71289	9.52965
0	0.124023	0.175396	0.248047	0.254587	0.350791	0.392197	0.494986	0.549034	0.626016	0.723175	0.794137	0.919925	1.05237	1.2244	1.34307	1.53409	1.75396	1.96098	2.28519	2.52498	2.82198	3.30936	3.79439	4.71941	9.70241
0	0.124023	0.175396	0.248047	0.255373	0.350791	0.392197	0.495504	0.549034	0.628337	0.723175	0.794137	0.92141	1.05278	1.2251	1.34377	1.53413	1.75396	1.96373	2.28569	2.52526	2.8251	3.30936	3.79439	4.71941	9.76246
0	0.124023	0.175396	0.248047	0.257765	0.350791	0.392197	0.496094	0.549034	0.629688	0.723175	0.794137	0.922057	1.05521	1.22777	1.34417	1.53569	1.75396	1.96529	2.28688	2.52567	2.82817	3.30936	3.79439	4.71941	9.7845
0	0.124023	0.175396	0.248047	0.25789	0.350791	0.392197	0.496094	0.549034	0.630178	0.723175	0.794137	0.923225	1.05599	1.2285	1.3452	1.53937	1.75396	1.96593	2.28688	2.52959	2.82817	3.31332	3.80556	4.72708	9.7845
0	0.124023	0.175396	0.248047	0.258756	0.350791	0.392197	0.496094	0.549991	0.630683	0.723175	0.794137	0.92367	1.058	1.22876	1.34536	1.53985	1.75396	1.96602	2.28688	2.52959	2.82817	3.31497	3.81359	4.73893	9.82842
0	0.124023	0.175396	0.248047	0.25885	0.350791	0.392197	0.496094	0.552156	0.631105	0.723175	0.794137	0.924276	1.05894	1.22916	1.34637	1.54175	1.75396	1.96784	2.28688	2.52959	2.82817	3.31645	3.82027	4.75522	9.82842
0	0.124023	0.175396	0.248047	0.260385	0.350791	0.392197	0.496094	0.552735	0.63152	0.723175	0.794137	0.924468	1.05966	1.22956	1.34676	1.5421	1.75396	1.96815	2.28688	2.52959	2.82817	3.31968	3.82561	4.7591	9.8378
0	0.124023	0.175396	0.248047	0.262178	0.350791	0.392197	0.496094	0.55443	0.632398	0.723175	0.794137	0.924787	1.05966	1.23008	1.34749	1.54227	1.75396	1.96821	2.29446	2.52959	2.83292	3.32178	3.8287	4.76091	9.92498
0	0.124023	0.175396	0.248047	0.262262	0.350791	0.392197	0.496094	0.55465	0.632398	0.723175	0.794137	0.925492	1.0602	1.23147	1.34779	1.54818	1.75396	1.96999	2.29804	2.52959	2.83908	3.32531	3.83478	4.76482	9.99909
0	0.124023	0.175396	0.248047	0.263018	0.350791	0.392197	0.496094	0.55465	0.632398	0.723175	0.794958	0.926606	1.06072	1.2319	1.35035	1.54836	1.75396	1.97117	2.29911	2.52959	2.84146	3.32596	3.84574	4.76482	10.0329
0	0.124023	0.175396	0.248047	0.26397	0.350791	0.392197	0.496094	0.55465	0.632398	0.723175	0.795295	0.930925	1.06226	1.2319	1.35185	1.54977	1.75396	1.97282	2.29954	2.52959	2.84435	3.32604	3.84973	4.77128	10.0513
0	0.124023	0.175396	0.248047	0.263971	0.350791	0.392197	0.496094	0.55465	0.632398	0.723175	0.796279	0.93455	1.06233	1.23354	1.35264	1.55057	1.75396	1.97574	2.30025	2.53068	2.84456	3.32669	3.85072	4.77128	10.0727
0	0.124023	0.175396	0.248047	0.26413	0.350791	0.392197	0.496094	0.55465	0.632398	0.723175	0.796279	0.934916	1.06233	1.23618	1.35421	1.55218	1.75396	1.9785	2.3008	2.53195	2.84611	3.3279	3.85072	4.77613	10.1699
0	0.124023	0.175396	0.248047	0.265018	0.350791	0.392197	0.496094	0.55465	0.632398	0.723175	0.796279	0.936214	1.06246	1.23935	1.35421	1.55257	1.75396	1.98438	2.30111	2.53374	2.85016	3.3328	3.85072	4.8016	10.1971
0	0.124023	0.175396	0.248047	0.265582	0.350791	0.392197	0.496094	0.55465	0.632398	0.723175	0.796279	0.93634	1.06277	1.24001	1.35623	1.55288	1.75396	1.98438	2.30237	2.53491	2.85671	3.33337	3.85072	4.8162	10.1971
0	0.124023	0.175396	0.248047	0.265582	0.350791	0.392197	0.496094	0.55465	0.632398	0.723175	0.796279	0.937048	1.06278	1.24023	1.35698	1.55318	1.75396	1.98438	2.30481	2.53625	2.85934	3.3371	3.85072	4.8162	10.4121
0	0.124023	0.175396	0.248047	0.265582	0.350791	0.392197	0.496094	0.55465	0.632398	0.725155	0.79634	0.938974	1.06285	1.24023	1.35761	1.55446	1.75396	1.98438	2.30694	2.53641	2.85984	3.33713	3.85072	4.8162	10.468
0	0.124023	0.175396	0.248047	0.265582	0.350791	0.392197	0.496094	0.55465	0.632398	0.725697	0.796746	0.938974	1.06373	1.24023	1.35855	1.55468	1.75396	1.98438	2.30745	2.53651	2.86257	3.33713	3.85108	4.8162	10.5383
0	0.124023	0.175396	0.248047	0.265582	0.350791	0.392197	0.496094	0.55465	0.632398	0.726415	0.796746	0.938974	1.06414	1.24023	1.35874	1.556	1.75396	1.98438	2.30767	2.54108	2.8634	3.33713	3.85815	4.8162	10.5617
0	0.124023	0.175396	0.248047	0.265582	0.350791	0.392197	0.496094	0.55465	0.632398	0.728484	0.796746	0.938974	1.06442	1.24023	1.359	1.55627	1.75396	1.98438	2.30808	2.54588	2.86378	3.33713	3.8587	4.87335	10.666
0	0.124023	0.175396	0.248047	0.265582	0.350791	0.393381	0.496094	0.55465	0.632398	0.728546	0.797891	0.939836	1.06442	1.24023	1.35919	1.55668	1.75396	1.98438	2.30858	2.5538	2.87114	3.33713	3.86073	4.87335	10.6689
0	0.124023	0.175396	0.248047	0.265582	0.350791	0.394206	0.496094	0.55465	0.633047	0.730478	0.79807	0.939961	1.06506	1.24023	1.36086	1.55848	1.75396	1.98502	2.30903	2.5538	2.87157	3.33713	3.87096	4.87521	10.6775
0	0.124023	0.175396	0.248047	0.265582	0.350791	0.394834	0.496094	0.55465	0.634154	0.731038	0.798375	0.939961	1.06689	1.24023	1.36373	1.55854	1.75396	1.98597	2.31299	2.5538	2.87301	3.33713	3.87462	4.88593	10.6775
0	0.124023	0.175396	0.248047	0.265582	0.350791	0.395909	0.496094	0.55465	0.634442	0.731333	0.800425	0.941961	1.06689	1.24023	1.36602	1.55862	1.75396	1.98639	2.31473	2.5538	2.88048	3.3373	3.87462	4.88596	10.735
0	0.124023	0.175396	0.248047	0.265582	0.350791	0.396562	0.496094	0.55465	0.634645	0.734417	0.80107	0.943432	1.06689	1.24023	1.36631	1.56142	1.75396	1.98746	2.31574	2.5538	2.88057	3.34359	3.87462	4.89351	10.7808
0	0.124023	0.175396	0.248047	0.265709	0.350791	0.396878	0.496094	0.55465	0.635405	0.734779	0.801471	0.944499	1.06689	1.24023	1.36646	1.5622	1.75396	1.98792	2.31717	2.5538	2.88133	3.3472	3.87584	4.95293	10.9843
0	0.124023	0.175396	0.248047	0.267058	0.350791	0.397291	0.496094	0.55465	0.635977	0.735047	0.803604	0.944534	1.06689	1.24023	1.36717	1.5622	1.75396	1.98982	2.31935	2.5538	2.88716	3.35034	3.88255	4.96094	11.1869
0	0.124023	0.17578	0.248047	0.267493	0.350791	0.397977	0.496094	0.55465	0.636288	0.735194	0.8058	0.944534	1.06689	1.24023	1.36717	1.5622	1.75396	1.9931	2.32517	2.5538	2.8927	3.35729	3.92197	4.96094	11.2963
0	0.124023	0.176085	0.248047	0.270598	0.350791	0.398176	0.496094	0.55465	0.636625	0.735194	0.80615	0.944534	1.06689	1.24023	1.36988	1.56352	1.75396	1.99982	2.32568	2.5538	2.8927	3.37062	3.92197	4.96094	11.4344
0	0.124023	0.176387	0.248047	0.271352	0.350791	0.39871	0.496094	0.55465	0.637784	0.735194	0.807205	0.944792	1.06689	1.24023	1.37164	1.5658	1.75396	1.99982	2.32581	2.5538	2.8927	3.3738	3.92197	4.96094	11.4666
0	0.124023	0.176745	0.248047	0.27167	0.350791	0.399435	0.496094	0.55465	0.639322	0.735194	0.810618	0.945003	1.06788	1.24023	1.37193	1.56651	1.75396	1.99982	2.33132	2.5538	2.8927	3.3738	3.92197	4.96713	11.5388
0	0.124023	0.177362	0.248047	0.271751	0.350791	0.399981	0.496094	0.55465	0.639606	0.735194	0.812434	0.945682	1.06799	1.24023	1.37328	1.56666	1.75396	1.99982	2.33512	2.55385	2.8927	3.3738	3.92197	4.96713	11.7003
0	0.124023	0.177785	0.248047	0.271827	0.350791	0.400318	0.496094	0.55465	0.64185	0.735194	0.812549	0.945933	1.06886	1.24023	1.37328	1.56704	1.75396	1.99982	2.33564	2.55438	2.8927	3.37786	3.92197	4.96713	11.8119
0	0.124023	0.177924	0.248047	0.272079	0.350791	0.400877	0.496094	0.55465	0.642168	0.736599	0.814638	0.946994	1.06988	1.24023	1.37389	1.56775	1.75396	1.99982	2.33588	2.55473	2.8927	3.37955	3.92197	4.96713	11.8249
0	0.124023	0.178043	0.248047	0.272691	0.350791	0.401246	0.496094	0.55465	0.642614	0.736648	0.8177	0.948321	1.07181	1.24023	1.37633	1.56786	1.75396	1.99982	2.33685	2.55789	2.8927	3.38184	3.92197	4.96713	11.8571
0	0.124023	0.178227	0.248047	0.273949	0.350791	0.40339	0.496094	0.55465	0.643774	0.73703	0.817848	0.950733	1.07246	1.24023	1.37711	1.56879	1.75396	1.99982	2.33876	2.5588	2.8927	3.3886	3.92197	4.97559	11.9192
0	0.124023	0.178663	0.248047	0.27397	0.350791	0.404763	0.496094	0.55465	0.644808	0.73708	0.818807	0.951076	1.0727	1.24023	1.37745	1.56879	1.75466	1.99982	2.33937	2.55935	2.89389	3.39475	3.92197	4.97884	11.9295
0	0.124023	0.179382	0.248047	0.273999	0.350791	0.404892	0.496094	0.55465	0.644808	0.737537	0.820324	0.951373	1.07341	1.24023	1.37802	1.56879	1.75492	1.99982	2.33997	2.56071	2.89623	3.39681	3.92197	4.98568	11.9421
0	0.124023	0.180062	0.248047	0.274114	0.350791	0.405617	0.496094	0.55465	0.644808	0.737929	0.821176	0.952529	1.07379	1.24023	1.37974	1.56879	1.75616	1.99982	2.34007	2.56376	2.89807	3.39911	3.92197	4.98568	12.0092
0	0.124023	0.180747	0.248047	0.274284	0.350791	0.40592	0.496094	0.55465	0.64524	0.738224	0.821972	0.955908	1.07552	1.24023	1.38315	1.56879	1.75691	1.99982	2.34007	2.56429	2.90331	3.40478	3.92197	4.98568	12.0552
0	0.124023	0.181682	0.248047	0.274529	0.350791	0.407453	0.496094	0.55465	0.646172	0.739721	0.821972	0.957569	1.07563	1.24023	1.38321	1.56879	1.75698	1.99982	2.34007	2.57043	2.90331	3.40627	3.92197	4.99185	12.1771
0	0.124023	0.18183	0.248047	0.274705	0.350791	0.407812	0.496094	0.55465	0.6468	0.740798	0.823966	0.957569	1.0759	1.24023	1.38458	1.56879	1.75784	2.00643	2.34007	2.57137	2.90355	3.40686	3.92197	5.02257	12.1771
0	0.124023	0.182255	0.248047	0.27541	0.350791	0.407812	0.496094	0.55465	0.646956	0.741482	0.825417	0.958604	1.07605	1.24023	1.38511	1.56879	1.76022	2.00721	2.34007	2.58377	2.91667	3.40778	3.93213	5.02257	12.3152
0	0.124023	0.182885	0.248047	0.275793	0.350791	0.407812	0.496094	0.55465	0.648125	0.741948	0.825913	0.959016	1.07751	1.24023	1.38662	1.56879	1.76058	2.00903	2.34007	2.58558	2.91671	3.40804	3.94836	5.05918	12.4123
0	0.124023	0.18291	0.248047	0.275932	0.350791	0.407812	0.496094	0.55465	0.648227	0.74223	0.826069	0.960772	1.0802	1.24023	1.38662	1.56879	1.7617	2.01427	2.34007	2.58646	2.91673	3.40886	3.95036	5.05918	12.4157
0	0.124023	0.183247	0.248047	0.275999	0.350791	0.407812	0.496094	0.55465	0.648361	0.74223	0.826542	0.961824	1.08079	1.24023	1.38662	1.56879	1.76191	2.01588	2.34007	2.58937	2.93765	3.41872	3.95941	5.07076	12.442
0	0.124023	0.184865	0.248047	0.276421	0.350791	0.407812	0.496094	0.55465	0.648497	0.74309	0.826651	0.961824	1.08135	1.24023	1.38662	1.56879	1.7627	2.01612	2.34007	2.58969	2.94053	3.42138	3.96875	5.0895	12.4568
0	0.124023	0.185027	0.248047	0.277325	0.350791	0.408006	0.496094	0.55465	0.648928	0.744141	0.826676	0.961824	1.08278	1.24023	1.38662	1.56896	1.76444	2.01626	2.34007	2.58969	2.944	3.42379	3.96875	5.1076	12.4913
0	0.124023	0.185324	0.248047	0.277325	0.350791	0.408024	0.496094	0.55465	0.649849	0.744141	0.826835	0.96205	1.08358	1.24023	1.38766	1.57121	1.76972	2.01706	2.34007	2.58969	2.9555	3.42605	3.96875	5.11362	12.6528
0	0.124023	0.185539	0.248047	0.277325	0.350791	0.408854	0.496094	0.55465	0.65242	0.744141	0.82715	0.962435	1.08493	1.24023	1.38795	1.57137	1.77058	2.01875	2.34007	2.58969	2.95602	3.42976	3.96875	5.11362	12.7397
0	0.124023	0.185642	0.248047	0.277325	0.350791	0.409807	0.496094	0.55465	0.652819	0.744141	0.82715	0.964354	1.08617	1.24023	1.38826	1.57203	1.77217	2.01924	2.34007	2.58969	2.96704	3.43011	3.96875	5.17937	12.7858
0	0.124023	0.185881	0.248047	0.277325	0.350791	0.409861	0.496094	0.55465	0.652819	0.744141	0.82715	0.96458	1.08667	1.24023	1.3889	1.57223	1.77225	2.01966	2.34007	2.59362	2.97012	3.43526	3.96875	5.20898	12.8051
0	0.124023	0.18616	0.248047	0.277325	0.350791	0.410644	0.496094	0.55465	0.652819	0.744141	0.827189	0.96466	1.08925	1.24023	1.38956	1.57366	1.77492	2.02118	2.34007	2.59713	2.97656	3.43926	3.97223	5.20898	13.5793
0	0.124023	0.18628	0.248047	0.277325	0.350791	0.410767	0.496094	0.55465	0.652819	0.744141	0.827277	0.965277	1.09101	1.24023	1.39019	1.57574	1.77575	2.02144	2.34502	2.60635	2.97656	3.44794	3.97649	5.21489	13.8062
0	0.124023	0.186917	0.248047	0.277325	0.350791	0.412405	0.496094	0.55465	0.652819	0.744141	0.828662	0.965553	1.09178	1.24023	1.39219	1.57614	1.77575	2.02586	2.34542	2.60788	2.97656	3.44909	3.97649	5.21489	14.5526
0	0.124023	0.18771	0.248047	0.277325	0.350791	0.413419	0.496094	0.55465	0.652819	0.744141	0.829544	0.966227	1.0918	1.24023	1.39241	1.57764	1.77661	2.02708	2.34587	2.60923	2.97656	3.45194	3.97649	5.23255	14.7437
0	0.124023	0.187795	0.248047	0.277325	0.350791	0.41371	0.496094	0.55465	0.652819	0.744141	0.831702	0.967212	1.09187	1.24023	1.39242	1.5781	1.77957	2.0302	2.34623	2.61114	2.97656	3.45489	3.97649	5.24503	14.7604
0	0.124023	0.187795	0.248047	0.277325	0.350791	0.414492	0.496094	0.55465	0.652819	0.744141	0.831975	0.968654	1.09243	1.24023	1.39366	1.57855	1.77963	2.03101	2.34951	2.61253	2.98607	3.45489	3.97649	5.25602	14.7687
0	0.124023	0.187795	0.248047	0.277325	0.350791	0.415757	0.496094	0.55465	0.652819	0.744141	0.831975	0.968654	1.09364	1.24023	1.39498	1.57885	1.77963	2.03305	2.34959	2.61566	2.98647	3.45489	3.97649	5.26187	14.9035
0	0.124023	0.187795	0.248047	0.277325	0.350791	0.417076	0.496094	0.55465	0.652908	0.744141	0.831975	0.968654	1.09414	1.24023	1.39501	1.58097	1.78325	2.03506	2.35106	2.62076	2.98647	3.45489	3.99964	5.26187	14.9097
0	0.124023	0.187795	0.248047	0.277325	0.350791	0.417473	0.496094	0.55465	0.653489	0.744141	0.831975	0.968654	1.0943	1.24023	1.39507	1.58106	1.78345	2.0357	2.35318	2.62257	2.98688	3.45489	3.99964	5.30264	14.9838
0	0.124023	0.187795	0.248047	0.277325	0.350791	0.418146	0.496094	0.55465	0.65383	0.744141	0.831975	0.968654	1.09502	1.24023	1.39512	1.58301	1.78345	2.03622	2.35318	2.62427	2.98688	3.45559	3.99964	5.32579	15.2685
0	0.124023	0.187795	0.248047	0.277325	0.350791	0.419629	0.496094	0.55465	0.655298	0.744141	0.831975	0.968654	1.09502	1.24214	1.3955	1.58436	1.7835	2.03642	2.35318	2.62925	2.98688	3.46929	3.99964	5.34309	15.4706
0	0.124023	0.187795	0.248047	0.277325	0.350791	0.419922	0.496094	0.55465	0.655939	0.744141	0.831975	0.968654	1.09502	1.24299	1.39563	1.58477	1.78485	2.03886	2.35318	2.63256	2.98688	3.47266	3.99964	5.3546	15.4706
0	0.124023	0.187795	0.248047	0.277325	0.350791	0.419922	0.496094	0.55465	0.655939	0.744141	0.834118	0.968654	1.09603	1.24337	1.39613	1.58494	1.78497	2.04	2.35318	2.63401	2.98688	3.47266	3.99964	5.41743	15.8944
0	0.124023	0.187795	0.248047	0.277325	0.350791	0.419922	0.496094	0.55465	0.655939	0.744141	0.834784	0.968654	1.09699	1.24357	1.39723	1.58596	1.78501	2.04049	2.35382	2.63677	2.99025	3.47266	3.99971	5.44574	15.9697
0	0.124023	0.187795	0.248047	0.277325	0.350791	0.419922	0.496094	0.55465	0.655939	0.744141	0.836351	0.968654	1.09753	1.24491	1.39778	1.58752	1.78745	2.04117	2.35755	2.63677	2.99045	3.47266	4.00732	5.45232	16.0848
0	0.124023	0.187795	0.248047	0.277325	0.350791	0.419922	0.496094	0.55465	0.65642	0.744141	0.836608	0.968654	1.09807	1.24642	1.39934	1.58827	1.78844	2.04157	2.35907	2.63677	2.99147	3.47266	4.00732	5.49075	16.2598
0	0.124023	0.187795	0.248047	0.277325	0.350791	0.419922	0.496094	0.55465	0.656454	0.744141	0.8381	0.971189	1.09876	1.24642	1.40014	1.58827	1.78869	2.0447	2.35948	2.63677	2.99546	3.47266	4.00732	5.49075	16.3805
0	0.124023	0.187795	0.248047	0.277325	0.350791	0.419922	0.496094	0.55465	0.656784	0.744141	0.838447	0.971311	1.10042	1.24642	1.40074	1.58827	1.78869	2.04545	2.36668	2.63903	2.99646	3.4815	4.00732	5.50753	16.3955
0	0.124023	0.187795	0.248047	0.277325	0.350791	0.419922	0.496094	0.55465	0.657627	0.744141	0.83846	0.972592	1.10279	1.24642	1.40085	1.58827	1.78869	2.04545	2.36711	2.64172	2.99655	3.4815	4.00732	5.50753	16.4909
0	0.124023	0.187795	0.248047	0.277325	0.350791	0.419922	0.496094	0.55465	0.657824	0.744141	0.839844	0.973451	1.10279	1.24642	1.40238	1.58827	1.78869	2.04545	2.36858	2.65383	2.99716	3.4815	4.01163	5.5465	16.7886
0	0.124023	0.187795	0.248047	0.277325	0.350791	0.419922	0.496094	0.55465	0.65939	0.744141	0.839844	0.974732	1.10464	1.24642	1.40317	1.58827	1.78869	2.04545	2.3686	2.6587	2.99716	3.4815	4.01478	5.5465	16.869
0	0.124023	0.187795	0.248047	0.277325	0.350791	0.419922	0.496094	0.55465	0.660848	0.744141	0.840348	0.976426	1.10464	1.24642	1.40317	1.58827	1.78869	2.04698	2.36971	2.6627	2.99716	3.4815	4.01705	5.58562	16.9127
0	0.124023	0.187795	0.248047	0.277325	0.350791	0.419922	0.496094	0.55465	0.661098	0.744141	0.840704	0.976682	1.10464	1.24646	1.40317	1.58827	1.78869	2.04862	2.37304	2.66319	2.99716	3.4815	4.03791	5.59619	17.036
0	0.124023	0.187795	0.248047	0.277325	0.350791	0.419922	0.496094	0.55465	0.662083	0.744141	0.841808	0.978868	1.10537	1.24699	1.40317	1.58827	1.78869	2.04894	2.37394	2.6652	2.99716	3.48785	4.03791	5.59619	17.0865
0	0.124023	0.187795	0.248047	0.277325	0.350791	0.419922	0.496094	0.55465	0.662521	0.744141	0.842568	0.979418	1.10597	1.24712	1.40317	1.58827	1.78877	2.05032	2.37423	2.67155	2.99716	3.49453	4.06827	5.65634	17.1798
0	0.124023	0.187795	0.248047	0.277325	0.350791	0.419922	0.496338	0.55465	0.664422	0.744141	0.842829	0.979418	1.10786	1.24906	1.40317	1.58827	1.79231	2.05032	2.37447	2.67155	2.99716	3.49776	4.06827	5.65634	17.2602
0	0.124023	0.187795	0.248047	0.277325	0.350791	0.420248	0.496936	0.55465	0.665332	0.744141	0.844033	0.981302	1.10879	1.25024	1.40317	1.58827	1.79287	2.05032	2.37549	2.67155	2.99716	3.49932	4.06827	5.66721	17.2745
0	0.124023	0.187795	0.248047	0.277325	0.350791	0.420364	0.498632	0.55465	0.667887	0.744141	0.844496	0.981784	1.10925	1.25044	1.40317	1.58827	1.79298	2.0524	2.37604	2.67155	2.99716	3.50157	4.09089	5.71047	17.3065
0	0.124023	0.187795	0.248047	0.277325	0.350791	0.420364	0.498834	0.55465	0.667887	0.744141	0.844794	0.981865	1.1093	1.25281	1.40317	1.58827	1.79459	2.05295	2.37784	2.67155	2.99723	3.50396	4.09089	5.72661	17.3633
0	0.124023	0.187845	0.248047	0.277325	0.350791	0.420364	0.499536	0.55465	0.667887	0.744141	0.848264	0.983012	1.1093	1.25342	1.40317	1.58827	1.79501	2.05326	2.37981	2.67155	2.99762	3.50406	4.09089	5.72661	17.4358
0	0.124023	0.188029	0.248047	0.277325	0.350791	0.420364	0.5	0.55465	0.667887	0.744141	0.848597	0.983012	1.1093	1.25406	1.40317	1.58827	1.79579	2.05723	2.38043	2.67155	2.9986	3.50791	4.0977	5.76942	17.6967
0	0.124023	0.188171	0.248047	0.277325	0.351993	0.420364	0.500063	0.55465	0.667887	0.744141	0.849067	0.985325	1.1093	1.25468	1.40317	1.58827	1.79787	2.05927	2.38136	2.67155	2.99932	3.50791	4.10247	5.7854	17.7834
0	0.124023	0.188175	0.248047	0.277325	0.352275	0.420364	0.500677	0.55465	0.667887	0.744141	0.84934	0.987268	1.1093	1.25483	1.40317	1.58827	1.79868	2.06018	2.38213	2.67155	3.0012	3.50791	4.10591	5.79071	17.9453
0	0.124023	0.188179	0.248047	0.277325	0.353576	0.420364	0.500862	0.554776	0.667887	0.744141	0.850543	0.98757	1.1093	1.25485	1.40317	1.58827	1.80116	2.06181	2.38304	2.67155	3.01428	3.50791	4.1131	5.7952	18.1091
0	0.124023	0.18822	0.248047	0.277325	0.354544	0.421402	0.502132	0.556226	0.667887	0.744141	0.851427	0.988179	1.1093	1.25485	1.40474	1.58827	1.80404	2.06375	2.38338	2.67512	3.01639	3.50791	4.14431	5.81192	18.1346
0	0.124023	0.188459	0.248047	0.277325	0.355556	0.421651	0.50303	0.557223	0.667887	0.744141	0.851988	0.989186	1.1093	1.25805	1.40856	1.58827	1.80481	2.06468	2.38483	2.67927	3.01762	3.50791	4.15802	5.81192	18.3034
0	0.124023	0.189638	0.248047	0.277325	0.355908	0.422292	0.503906	0.560164	0.667887	0.744141	0.853551	0.990682	1.1093	1.25814	1.40894	1.58827	1.80581	2.07011	2.38518	2.68016	3.01762	3.50791	4.15802	5.95312	18.4574
0	0.124023	0.189918	0.248047	0.277325	0.356316	0.422953	0.503906	0.561176	0.667887	0.744141	0.853807	0.990864	1.1093	1.25918	1.41048	1.58827	1.80581	2.07109	2.38658	2.68304	3.01794	3.50791	4.15802	5.96345	18.5223
0	0.124023	0.190031	0.248047	0.277325	0.356316	0.422965	0.503906	0.561819	0.667887	0.744141	0.854039	0.991834	1.1093	1.25919	1.41051	1.58827	1.80581	2.07169	2.38743	2.68304	3.02195	3.50791	4.15802	5.99432	18.5919
0	0.124023	0.190254	0.248047	0.277325	0.356316	0.423161	0.505195	0.563384	0.667887	0.744141	0.854754	0.992188	1.1093	1.25977	1.41134	1.58827	1.80581	2.07171	2.38793	2.68304	3.02248	3.50791	4.15802	6.08094	18.6052
0	0.124023	0.190363	0.248047	0.277325	0.357056	0.423578	0.505459	0.563384	0.667887	0.74503	0.857645	0.992188	1.1093	1.26066	1.4117	1.58827	1.80633	2.07259	2.38863	2.68304	3.0278	3.50791	4.18829	6.08719	18.6184
0	0.124023	0.190566	0.248047	0.277325	0.357366	0.423639	0.505772	0.563384	0.667887	0.746398	0.858671	0.992188	1.1093	1.2619	1.41202	1.58827	1.80645	2.07277	2.38922	2.68628	3.0278	3.50791	4.2168	6.12631	18.6366
0	0.124023	0.190814	0.248047	0.277325	0.35799	0.425828	0.505838	0.563384	0.667948	0.74711	0.859103	0.992188	1.1093	1.2621	1.41357	1.58827	1.8069	2.07302	2.38924	2.69499	3.03668	3.50985	4.2168	6.22098	18.7206
0	0.124023	0.191137	0.248047	0.277325	0.359534	0.427877	0.505914	0.563384	0.670252	0.74876	0.860665	0.992188	1.10945	1.2622	1.41408	1.58827	1.80801	2.07368	2.38939	2.69638	3.04031	3.52065	4.22409	6.24566	18.7747
0	0.124023	0.191147	0.248047	0.277325	0.360729	0.428238	0.505987	0.563831	0.671297	0.74924	0.862428	0.992188	1.10966	1.26256	1.41408	1.58827	1.81102	2.07585	2.39176	2.69952	3.04714	3.52524	4.22409	6.31424	18.8336
0	0.124023	0.191406	0.248047	0.277325	0.36118	0.428238	0.507425	0.564365	0.671875	0.749706	0.864672	0.992188	1.11106	1.2632	1.41408	1.58827	1.81167	2.07738	2.39223	2.70107	3.04726	3.52541	4.22409	6.3531	18.8418
0	0.124023	0.191464	0.248047	0.277325	0.36185	0.428238	0.508558	0.565163	0.672363	0.75028	0.864672	0.992188	1.11175	1.2648	1.41408	1.58827	1.81411	2.07954	2.39504	2.70199	3.05205	3.52545	4.22409	6.43489	18.8551
0.000392197	0.124023	0.19191	0.248047	0.277325	0.362053	0.428238	0.508561	0.566689	0.674025	0.750999	0.865364	0.992188	1.11373	1.2648	1.41452	1.58868	1.81556	2.07985	2.39563	2.70326	3.05381	3.5287	4.22409	6.43967	18.8586
0.0040626	0.124023	0.19222	0.248047	0.277325	0.362577	0.428238	0.509597	0.567263	0.675159	0.751179	0.867735	0.992188	1.11429	1.2648	1.41457	1.5891	1.81819	2.08072	2.39603	2.70565	3.05529	3.53941	4.22409	6.54863	18.8717
0.00594407	0.124023	0.192342	0.248047	0.277325	0.362594	0.428238	0.509692	0.567796	0.675249	0.751654	0.867877	0.992188	1.1144	1.2648	1.41637	1.58938	1.81914	2.08248	2.39612	2.70631	3.06753	3.54242	4.22409	6.61872	18.8963
0.00843542	0.124023	0.192773	0.248047	0.277348	0.362764	0.428238	0.509766	0.568337	0.675326	0.752004	0.868042	0.992188	1.1147	1.2648	1.41653	1.59013	1.82615	2.08361	2.39749	2.70703	3.06817	3.54418	4.23863	6.67887	18.9434
0.0105449	0.124023	0.192843	0.248047	0.27795	0.362795	0.428238	0.509766	0.569123	0.676168	0.752256	0.868164	0.992188	1.11519	1.2648	1.41676	1.59019	1.82631	2.08613	2.39749	2.70986	3.06817	3.55092	4.24588	6.67887	18.9571
0.0106118	0.124023	0.192979	0.248047	0.27873	0.363723	0.428238	0.509766	0.569759	0.677104	0.754405	0.868164	0.992188	1.11621	1.2648	1.41896	1.59279	1.82679	2.0874	2.40422	2.71437	3.06817	3.55149	4.24588	6.81113	18.9703
0.0108014	0.124023	0.193192	0.248047	0.278741	0.364207	0.428238	0.509766	0.570111	0.677104	0.754405	0.868164	0.992188	1.11621	1.2648	1.42004	1.59424	1.82863	2.08856	2.40434	2.7151	3.07332	3.55149	4.24588	6.81113	18.9785
0.0110444	0.124023	0.193305	0.248047	0.278838	0.366888	0.428238	0.509766	0.570371	0.677104	0.754405	0.868824	0.992188	1.11724	1.2648	1.42007	1.59432	1.83095	2.08882	2.40461	2.71511	3.07919	3.55149	4.26756	6.84268	18.9853
0.0116509	0.124023	0.193328	0.248047	0.278866	0.367419	0.428267	0.509766	0.57206	0.677104	0.754405	0.870453	0.992188	1.11802	1.2648	1.42047	1.59464	1.83256	2.09296	2.41406	2.7171	3.08114	3.55149	4.26756	6.86064	19.0678
0.0126285	0.124023	0.194252	0.248047	0.278891	0.367597	0.428581	0.509766	0.57422	0.681297	0.754405	0.870938	0.992188	1.11815	1.2648	1.42327	1.59586	1.83344	2.0941	2.41452	2.72163	3.09351	3.55149	4.26756	6.86064	19.0874
0.0129038	0.124023	0.194454	0.248047	0.279332	0.367597	0.429447	0.509766	0.574607	0.681774	0.754405	0.871088	0.992188	1.11947	1.2648	1.42397	1.59679	1.83423	2.09527	2.41557	2.72583	3.10802	3.55201	4.26756	6.89642	19.1189
0.0131184	0.124023	0.19446	0.248047	0.279771	0.367597	0.431702	0.509766	0.575461	0.682062	0.754405	0.871088	0.992188	1.11988	1.2648	1.42627	1.59688	1.83516	2.09583	2.41682	2.72655	3.10802	3.55769	4.26756	6.96301	19.143
0.0133727	0.124023	0.194789	0.248047	0.280771	0.367597	0.432476	0.509766	0.576734	0.682347	0.754405	0.871088	0.992188	1.12013	1.2648	1.42654	1.5977	1.83609	2.09707	2.4182	2.72838	3.10802	3.57012	4.26756	6.98506	19.1717
0.0133767	0.124023	0.19489	0.248047	0.280826	0.367597	0.43255	0.509766	0.576734	0.682834	0.754405	0.871533	0.992188	1.12049	1.2648	1.4266	1.59821	1.83798	2.09713	2.4206	2.72852	3.10802	3.57178	4.28195	7.02021	19.2031
0.0136279	0.124023	0.195087	0.248047	0.281306	0.367597	0.43255	0.509766	0.576734	0.683806	0.755055	0.871935	0.993642	1.12148	1.2648	1.42687	1.59988	1.83816	2.09832	2.42797	2.72852	3.11414	3.57738	4.29766	7.02021	19.2119
0.0138757	0.124023	0.196001	0.248047	0.281336	0.367597	0.432745	0.509766	0.576734	0.683843	0.755868	0.872507	0.996636	1.12148	1.2648	1.42734	1.60038	1.84013	2.09991	2.4293	2.72852	3.11415	3.57738	4.31719	7.05518	19.2152
0.0142303	0.124023	0.196297	0.248047	0.281618	0.367597	0.433896	0.509766	0.576734	0.683922	0.756397	0.874254	0.997274	1.12729	1.2648	1.4292	1.60044	1.84119	2.10259	2.4299	2.72852	3.12502	3.59244	4.33195	7.05518	19.3047
0.0145589	0.124023	0.196432	0.248047	0.281876	0.367597	0.434705	0.509766	0.576734	0.683922	0.75667	0.874571	0.998367	1.1274	1.2648	1.4302	1.60133	1.84148	2.10331	2.43013	2.7295	3.1294	3.60331	4.33195	7.15906	19.3556
0.014599	0.124023	0.196493	0.248047	0.282195	0.367597	0.434798	0.509766	0.576734	0.683922	0.757679	0.875955	0.998802	1.12789	1.2648	1.43146	1.60139	1.84168	2.10366	2.43085	2.73356	3.13652	3.60758	4.33195	7.19336	19.4207
0.0148466	0.124023	0.196957	0.248047	0.282377	0.367597	0.435716	0.509766	0.577104	0.683922	0.760511	0.876823	0.999083	1.12863	1.2648	1.43149	1.60201	1.8419	2.10473	2.43161	2.73721	3.13757	3.6102	4.33195	7.23175	19.4254
0.0152629	0.124023	0.19709	0.248047	0.283388	0.367597	0.437119	0.509766	0.577154	0.683922	0.760696	0.876978	0.999232	1.1287	1.2648	1.43292	1.60202	1.84259	2.10475	2.4325	2.73788	3.13757	3.61162	4.33905	7.29528	19.5391
0.0165774	0.124023	0.19714	0.248047	0.283513	0.367597	0.437222	0.509766	0.57722	0.683922	0.761574	0.876978	0.999681	1.12958	1.2648	1.43438	1.60212	1.84336	2.10475	2.43556	2.73977	3.13757	3.61162	4.39316	7.29949	19.569
0.0167704	0.124023	0.197172	0.248047	0.284085	0.367597	0.437243	0.509766	0.577902	0.686993	0.762022	0.876978	0.999909	1.12989	1.2648	1.43513	1.60218	1.84383	2.10475	2.43888	2.73977	3.13757	3.61162	4.3954	7.36244	19.569
0.0168909	0.124023	0.197296	0.248047	0.2853	0.367954	0.438005	0.509766	0.578282	0.688317	0.762261	0.876978	0.999909	1.12989	1.2648	1.43565	1.60238	1.84644	2.10475	2.44198	2.73977	3.13757	3.61162	4.3954	7.39995	19.6255
0.0179213	0.124023	0.198185	0.248047	0.285305	0.368467	0.440127	0.509766	0.581608	0.689026	0.762385	0.876978	0.999909	1.12989	1.2648	1.43571	1.60268	1.84728	2.10562	2.44298	2.73999	3.13757	3.61162	4.39733	7.44554	19.6568
0.0181142	0.124023	0.198331	0.248047	0.285788	0.369203	0.440133	0.509766	0.5831	0.689514	0.764332	0.876978	0.999909	1.13007	1.2648	1.43664	1.60452	1.84784	2.1084	2.44298	2.74624	3.13871	3.61162	4.41635	7.49906	19.66
0.018204	0.124023	0.19873	0.248047	0.285953	0.369318	0.441349	0.510857	0.583134	0.689914	0.765456	0.876978	0.999909	1.13123	1.2648	1.43816	1.60571	1.8484	2.1084	2.44298	2.74924	3.14105	3.61527	4.41635	7.49906	19.7832
0.0187312	0.124023	0.198746	0.248047	0.286696	0.369352	0.442179	0.510857	0.583612	0.690031	0.766091	0.876978	0.999909	1.13124	1.2648	1.43827	1.60668	1.85164	2.10854	2.44298	2.75403	3.15421	3.62711	4.41635	7.54405	19.9689
0.0188164	0.124023	0.198783	0.248047	0.286957	0.369933	0.442611	0.510857	0.583935	0.690492	0.770383	0.876978	0.999909	1.13136	1.2648	1.43831	1.60779	1.85209	2.11054	2.44298	2.75533	3.15712	3.62818	4.44347	7.55627	20.1896
0.0189626	0.124023	0.199628	0.248047	0.287428	0.370247	0.442701	0.510857	0.58398	0.69104	0.771828	0.876978	1.00037	1.13211	1.2648	1.4384	1.60827	1.85252	2.11122	2.44298	2.75599	3.15712	3.63937	4.45145	7.57254	20.3398
0.0192332	0.124023	0.199984	0.248047	0.288367	0.37117	0.44344	0.510857	0.584525	0.691152	0.773135	0.876978	1.00296	1.13383	1.2648	1.43991	1.60861	1.85468	2.11277	2.44298	2.76395	3.15712	3.64283	4.46484	7.70544	20.6833
0.0193306	0.124023	0.200075	0.248047	0.288367	0.371188	0.443537	0.510857	0.584587	0.691166	0.773941	0.876978	1.00391	1.13395	1.2648	1.44003	1.61181	1.85903	2.11411	2.44298	2.76407	3.15875	3.64505	4.46484	7.72538	20.9963
0.0194486	0.124023	0.200289	0.248047	0.288367	0.371307	0.443538	0.510857	0.585149	0.692104	0.774009	0.876978	1.00412	1.13553	1.2648	1.44568	1.6123	1.85978	2.1188	2.44374	2.7661	3.16645	3.64942	4.47173	7.7532	21.0153
0.0196137	0.124023	0.200299	0.248047	0.288367	0.37207	0.444414	0.511079	0.58517	0.69227	0.774298	0.876978	1.00412	1.13557	1.2648	1.44607	1.6123	1.86008	2.11931	2.44829	2.76912	3.16667	3.66237	4.47173	7.78883	21.1931
0.0210274	0.124023	0.200346	0.248047	0.288367	0.37207	0.444425	0.511362	0.585664	0.692553	0.774298	0.876978	1.00412	1.13617	1.2648	1.4461	1.6123	1.86035	2.11931	2.45335	2.76935	3.16842	3.66237	4.47173	7.92586	21.4772
0.0215776	0.124023	0.200372	0.248047	0.288367	0.37207	0.44474	0.511362	0.585891	0.692553	0.774298	0.876978	1.00412	1.13657	1.2648	1.44635	1.61329	1.86097	2.11931	2.45382	2.7702	3.17035	3.66237	4.47173	7.94137	21.6583
0.0227139	0.124023	0.200452	0.248047	0.288367	0.37207	0.444978	0.511362	0.58728	0.693605	0.774298	0.877034	1.00603	1.13987	1.2648	1.44635	1.61329	1.86182	2.11931	2.45466	2.77259	3.17267	3.66237	4.47173	7.94137	21.6952
0.0231761	0.124023	0.201401	0.248047	0.289866	0.37207	0.445112	0.511362	0.587874	0.695769	0.776452	0.877034	1.00616	1.13987	1.2648	1.44635	1.61329	1.86448	2.12108	2.45554	2.77287	3.17655	3.66316	4.47173	7.97231	22.0985
0.0233177	0.124023	0.202109	0.248047	0.291317	0.37207	0.445591	0.511362	0.587891	0.697512	0.776452	0.877034	1.00659	1.13987	1.2648	1.44635	1.61329	1.86476	2.12117	2.45554	2.77325	3.17655	3.67215	4.47173	7.99927	22.0985
0.0237044	0.124023	0.20211	0.248047	0.291429	0.37207	0.4459	0.511362	0.587891	0.697574	0.776603	0.877034	1.0068	1.13987	1.2648	1.44635	1.61455	1.86476	2.12328	2.45647	2.77325	3.17865	3.67842	4.47173	7.99927	22.2759
0.0239754	0.124023	0.202114	0.248047	0.291651	0.37207	0.446624	0.511362	0.588503	0.698867	0.778784	0.877034	1.00955	1.13987	1.2648	1.44635	1.61707	1.86508	2.1237	2.45705	2.77325	3.17872	3.68618	4.47173	8.00696	22.3215
0.0240417	0.124023	0.202133	0.248047	0.29174	0.37207	0.447173	0.511362	0.588608	0.700083	0.778948	0.877152	1.01059	1.13987	1.2648	1.44635	1.61767	1.8658	2.12469	2.46088	2.77325	3.18213	3.68748	4.47173	8.01464	22.3875
0.0241273	0.124023	0.202392	0.248047	0.292239	0.37207	0.447173	0.511362	0.590759	0.700739	0.783056	0.877366	1.01072	1.13987	1.2648	1.44635	1.61805	1.86638	2.12508	2.46868	2.77325	3.18631	3.68748	4.47173	8.01464	22.7081
0.0242011	0.124023	0.202887	0.248047	0.292245	0.37207	0.447173	0.511362	0.591643	0.700929	0.783191	0.877751	1.01118	1.14115	1.2648	1.44635	1.62969	1.86783	2.12518	2.47342	2.77325	3.19111	3.68748	4.47173	8.07963	22.8203
0.0243228	0.124023	0.203206	0.248047	0.292323	0.37207	0.447173	0.511362	0.591756	0.701583	0.784027	0.878053	1.01131	1.14121	1.2648	1.44635	1.63021	1.86803	2.12822	2.47574	2.77325	3.19254	3.68748	4.49191	8.09865	23.0804
0.0245786	0.124023	0.203747	0.248047	0.292476	0.37207	0.447173	0.511362	0.592459	0.701583	0.784393	0.881485	1.01131	1.14231	1.2648	1.44635	1.63049	1.87063	2.13032	2.4791	2.77325	3.19489	3.68748	4.49232	8.13654	23.1017
0.0248867	0.124039	0.203906	0.248047	0.292899	0.37207	0.447173	0.511362	0.592934	0.701583	0.784393	0.881713	1.01131	1.14231	1.2648	1.44635	1.63068	1.87065	2.13113	2.48047	2.77325	3.1999	3.68748	4.49232	8.1592	23.3283
0.0250036	0.124207	0.203906	0.248047	0.293284	0.37207	0.447173	0.511362	0.593438	0.701583	0.784393	0.88176	1.01131	1.14231	1.2648	1.44635	1.63127	1.8719	2.13186	2.48047	2.77325	3.20293	3.68748	4.49232	8.1592	23.3375
0.0254175	0.125029	0.203906	0.248047	0.293373	0.37207	0.447173	0.511362	0.593859	0.701583	0.784393	0.881796	1.01216	1.14231	1.26752	1.44635	1.63302	1.87253	2.13245	2.48047	2.77325	3.21218	3.68748	4.49309	8.20057	23.5658
0.0255226	0.125668	0.203906	0.248047	0.293728	0.37207	0.447173	0.511362	0.593859	0.701583	0.784393	0.883054	1.01312	1.14245	1.26964	1.44635	1.6339	1.87383	2.13295	2.48047	2.77325	3.21685	3.68748	4.49462	8.2193	23.5853
0.0256498	0.12576	0.203906	0.248047	0.29373	0.37207	0.447173	0.511362	0.593859	0.701583	0.784393	0.883517	1.01355	1.14342	1.27004	1.44635	1.63577	1.87489	2.13378	2.48047	2.77325	3.2192	3.68748	4.51692	8.2193	23.67
0.0258933	0.126378	0.203906	0.248047	0.293853	0.37207	0.447173	0.511362	0.593859	0.701583	0.784393	0.885443	1.01503	1.14344	1.27065	1.44635	1.63662	1.87565	2.13378	2.48047	2.77325	3.22461	3.68748	4.52643	8.24546	23.8241
0.0262359	0.126475	0.203906	0.248047	0.293975	0.37207	0.447173	0.511362	0.594484	0.701583	0.784393	0.885631	1.01533	1.14344	1.27165	1.44635	1.63664	1.87629	2.13378	2.48047	2.77325	3.22461	3.68977	4.52643	8.24546	23.9683
0.026481	0.12651	0.203906	0.248047	0.294441	0.37207	0.447173	0.511362	0.594484	0.701583	0.784393	0.889216	1.01708	1.14344	1.2758	1.44635	1.63679	1.87656	2.13378	2.48047	2.77325	3.22461	3.7097	4.55218	8.39337	24.3756
0.0265164	0.126599	0.203906	0.248047	0.296217	0.37207	0.447173	0.511362	0.594484	0.701583	0.784393	0.892192	1.01829	1.14344	1.27585	1.44635	1.63785	1.87682	2.13378	2.48047	2.77325	3.22461	3.7207	4.55354	8.43359	24.4273
0.0266722	0.12704	0.203906	0.248047	0.296449	0.37207	0.447173	0.511362	0.594484	0.701583	0.784393	0.893189	1.01943	1.14344	1.27733	1.44635	1.63794	1.87769	2.13378	2.48047	2.77325	3.22461	3.7207	4.56029	8.43724	24.6017
0.0272753	0.127051	0.203906	0.248047	0.297547	0.37207	0.447173	0.511362	0.594484	0.701583	0.784393	0.893315	1.02226	1.14591	1.27747	1.44635	1.63918	1.87786	2.13378	2.48047	2.77325	3.22461	3.7207	4.56958	8.43724	24.6304
0.0272866	0.1271	0.203906	0.248047	0.298221	0.37207	0.447173	0.511362	0.594484	0.701583	0.784393	0.894346	1.02272	1.14596	1.27826	1.44635	1.63971	1.87996	2.13378	2.48047	2.77325	3.22461	3.7207	4.57376	8.43724	24.8357
0.0274159	0.127576	0.203906	0.248047	0.29892	0.37207	0.447173	0.511362	0.594484	0.701583	0.784393	0.894346	1.02272	1.1466	1.27883	1.44635	1.64341	1.88016	2.13378	2.48047	2.77325	3.22461	3.7207	4.57376	8.44817	24.8505
0.027799	0.127611	0.203906	0.248047	0.29926	0.37207	0.447173	0.512512	0.594484	0.701583	0.784393	0.894346	1.02272	1.14666	1.27922	1.44635	1.64521	1.88275	2.13378	2.48047	2.77325	3.22461	3.7207	4.57376	8.44817	24.8753
0.0279229	0.127689	0.203906	0.248047	0.299943	0.37207	0.44738	0.513299	0.594484	0.701583	0.784393	0.894346	1.02272	1.14696	1.28112	1.44635	1.64737	1.88332	2.13378	2.48047	2.77325	3.22461	3.7207	4.57376	8.47725	25.2192
0.0280633	0.127779	0.203906	0.248047	0.300278	0.37207	0.448862	0.513827	0.594484	0.701583	0.784393	0.894346	1.02272	1.14741	1.28158	1.44635	1.6492	1.88731	2.13378	2.48047	2.77325	3.2341	3.7207	4.57376	8.5675	25.2594
0.0287269	0.127867	0.203906	0.248047	0.300499	0.37207	0.449209	0.514389	0.595452	0.701583	0.784393	0.894346	1.02272	1.14831	1.28197	1.44741	1.64923	1.88904	2.13378	2.48047	2.77325	3.23414	3.72896	4.57376	8.5675	25.2594
0.0291901	0.128087	0.203906	0.248047	0.301417	0.37207	0.450106	0.514467	0.596843	0.701583	0.784393	0.894346	1.02272	1.14978	1.28328	1.44787	1.64933	1.88907	2.13378	2.48766	2.77325	3.23414	3.72896	4.61203	8.59618	25.3312
0.0293157	0.128794	0.203906	0.248047	0.302777	0.37207	0.45025	0.51476	0.599282	0.701583	0.784393	0.894346	1.02272	1.15111	1.28605	1.44819	1.65133	1.88907	2.13378	2.49246	2.77325	3.23414	3.72896	4.61394	8.6639	25.9408
0.0299932	0.12902	0.203906	0.248047	0.30281	0.372798	0.450343	0.516232	0.60005	0.701583	0.784393	0.894346	1.02272	1.15122	1.28622	1.44843	1.65207	1.88907	2.13378	2.49267	2.77325	3.23414	3.72896	4.61394	8.6639	26.0556
0.0300907	0.129155	0.203906	0.248047	0.30281	0.375206	0.450911	0.516377	0.600891	0.701583	0.784393	0.894346	1.02272	1.15194	1.28962	1.45112	1.65213	1.88907	2.13378	2.49284	2.77325	3.23414	3.72896	4.62806	8.71347	26.1204
0.0302108	0.129365	0.203906	0.248047	0.30281	0.375343	0.452121	0.516445	0.601678	0.701583	0.784393	0.894346	1.02272	1.15274	1.28973	1.45235	1.65253	1.88907	2.13378	2.49284	2.77325	3.23414	3.72896	4.63165	8.76627	26.3093
0.0305017	0.13019	0.203906	0.248047	0.30281	0.37559	0.45227	0.516722	0.601996	0.70244	0.784393	0.894346	1.02272	1.15286	1.29197	1.45295	1.6543	1.88907	2.13378	2.49284	2.77325	3.23414	3.72896	4.6339	8.7908	26.3502
0.0311802	0.130549	0.203906	0.248047	0.30281	0.37559	0.45227	0.517063	0.603468	0.70247	0.784393	0.894346	1.02272	1.15325	1.29205	1.45644	1.6543	1.88907	2.13378	2.49284	2.77325	3.23414	3.72896	4.66038	8.7908	26.5213
0.0314224	0.130574	0.203906	0.248047	0.30281	0.37559	0.45227	0.517684	0.604003	0.705335	0.784393	0.894346	1.02272	1.15334	1.29301	1.45836	1.65626	1.89014	2.13378	2.49284	2.77325	3.23414	3.72896	4.66376	8.86399	26.7672
0.0315912	0.13097	0.203906	0.248047	0.30281	0.37559	0.45227	0.5181	0.604244	0.705777	0.784393	0.894346	1.02272	1.15372	1.2939	1.45963	1.65943	1.89066	2.13817	2.49284	2.77325	3.23414	3.72896	4.66793	8.87439	26.9562
0.0319646	0.131062	0.203906	0.248047	0.30281	0.37559	0.45227	0.519653	0.605372	0.705994	0.784393	0.894346	1.02272	1.15603	1.29484	1.45975	1.6613	1.89132	2.13988	2.49284	2.77603	3.23414	3.74085	4.68014	8.94346	27.0143
0.0321718	0.131761	0.203906	0.248047	0.30281	0.37559	0.45227	0.519861	0.60562	0.706835	0.784393	0.894346	1.02272	1.15611	1.29484	1.46777	1.66297	1.89314	2.14006	2.49284	2.77766	3.23587	3.74263	4.68019	8.96064	27.2005
0.0322997	0.131836	0.203906	0.248047	0.303621	0.37559	0.45227	0.519861	0.60562	0.708027	0.784393	0.894346	1.02272	1.15642	1.29484	1.46869	1.66395	1.89341	2.14346	2.49284	2.78267	3.24148	3.74568	4.69608	8.96407	27.5343
0.0323616	0.132754	0.203906	0.248047	0.303869	0.37559	0.45227	0.519861	0.60562	0.708588	0.784393	0.894346	1.02272	1.15714	1.29484	1.46885	1.66395	1.89341	2.14532	2.49284	2.78945	3.2431	3.74618	4.71289	8.98806	27.9336
0.0325163	0.132776	0.203906	0.248047	0.304627	0.37559	0.45227	0.519861	0.60562	0.711068	0.784393	0.894346	1.02272	1.15747	1.29484	1.46913	1.66395	1.89359	2.14937	2.49284	2.79539	3.24475	3.75363	4.71312	8.98806	28.1782
0.0325795	0.133284	0.203906	0.248047	0.305132	0.376085	0.452684	0.519861	0.60562	0.711102	0.784393	0.894346	1.02272	1.15752	1.29484	1.46913	1.66395	1.89367	2.1497	2.49284	2.79543	3.24976	3.75363	4.71549	8.99149	28.2174
0.0326097	0.133292	0.203906	0.248047	0.30528	0.377126	0.453157	0.519861	0.605793	0.712631	0.784393	0.894346	1.02462	1.1576	1.29614	1.46913	1.66395	1.89448	2.15095	2.49284	2.79873	3.25352	3.75363	4.71941	9.02904	29.6081
0.0326278	0.133585	0.203906	0.248047	0.30558	0.37739	0.453345	0.519861	0.605895	0.712923	0.784393	0.896019	1.02462	1.15794	1.29789	1.46913	1.66395	1.89452	2.15096	2.49284	2.80452	3.2542	3.75363	4.71941	9.05286	29.687
0.032994	0.13359	0.203906	0.248047	0.305859	0.377449	0.454237	0.519861	0.606436	0.713021	0.784393	0.896273	1.02462	1.1583	1.29863	1.46913	1.66395	1.89644	2.15267	2.49284	2.80798	3.26255	3.75363	4.71941	9.09693	30.3003
0.0331029	0.133654	0.203931	0.248047	0.305859	0.377611	0.455948	0.519861	0.606514	0.713672	0.784393	0.897198	1.02516	1.15979	1.29884	1.47022	1.66395	1.89648	2.15545	2.49284	2.8099	3.26255	3.75363	4.71941	9.12732	31.2824
0.0331572	0.133992	0.204086	0.248047	0.305859	0.379797	0.455948	0.519861	0.606546	0.713672	0.784393	0.898023	1.02516	1.16244	1.29931	1.47108	1.66467	1.89678	2.15628	2.49284	2.81083	3.26428	3.75363	4.73052	9.15088	31.3335
0.0335377	0.134041	0.20409	0.248047	0.305859	0.381318	0.455948	0.519861	0.607153	0.714006	0.784393	0.898191	1.02562	1.16244	1.30058	1.47166	1.6659	1.89719	2.15875	2.49284	2.81431	3.26578	3.75363	4.73893	9.19113	32.0048
0.033738	0.134049	0.204326	0.248047	0.305859	0.381374	0.455948	0.519861	0.607178	0.714295	0.784393	0.898538	1.02568	1.16413	1.3012	1.4722	1.66637	1.89749	2.16347	2.49284	2.81628	3.26591	3.75363	4.7505	9.19113	32.9856
0.034243	0.134375	0.204478	0.248047	0.305859	0.381423	0.455948	0.519861	0.607841	0.716345	0.784393	0.899132	1.02732	1.16755	1.30196	1.47309	1.66682	1.89912	2.16478	2.49339	2.82129	3.26809	3.75363	4.76482	9.23121	33.0052
0.0344424	0.13442	0.204586	0.248047	0.305859	0.381643	0.455948	0.519861	0.608933	0.716647	0.786356	0.89968	1.02765	1.16756	1.30333	1.47535	1.66759	1.90215	2.16598	2.49543	2.82794	3.27252	3.75363	4.76482	9.23121	33.0908
0.0344894	0.134603	0.205225	0.248047	0.305859	0.382616	0.455948	0.519861	0.609329	0.717563	0.786577	0.900427	1.02771	1.16771	1.30379	1.47571	1.66846	1.90224	2.16605	2.49547	2.82817	3.27877	3.75363	4.76482	9.31085	33.4201
0.0345066	0.13473	0.205353	0.248047	0.305859	0.383643	0.455948	0.519861	0.609437	0.717563	0.786747	0.901022	1.02772	1.16955	1.30524	1.4766	1.66884	1.90271	2.16723	2.49575	2.82817	3.28672	3.75498	4.76482	9.36028	33.7572
0.0346387	0.134998	0.205419	0.248047	0.305859	0.383899	0.455948	0.519861	0.610353	0.719324	0.789064	0.901303	1.02831	1.16977	1.30587	1.47733	1.6692	1.903	2.16737	2.49968	2.82817	3.29353	3.76355	4.76617	9.38981	33.889
0.0347266	0.13506	0.205697	0.248047	0.305859	0.384067	0.456887	0.520384	0.611163	0.719821	0.789336	0.901968	1.0285	1.16977	1.3064	1.47778	1.6704	1.90632	2.1683	2.50088	2.82817	3.29855	3.77624	4.76717	9.43883	35.9189
0.0349988	0.13508	0.205967	0.248047	0.305859	0.384075	0.46197	0.520571	0.611415	0.720051	0.792189	0.902833	1.02967	1.16977	1.30884	1.47864	1.67287	1.90812	2.16941	2.50257	2.82817	3.30383	3.78029	4.79755	9.44534	36.4975
0.0350791	0.135597	0.206218	0.248047	0.305859	0.386297	0.462004	0.52181	0.611415	0.720607	0.792297	0.902904	1.02969	1.16983	1.30953	1.48016	1.67608	1.9088	2.17278	2.50737	2.82817	3.30448	3.79439	4.8162	9.44534	36.6237
0.0353678	0.135659	0.206253	0.248047	0.305859	0.386948	0.462619	0.522374	0.611415	0.720917	0.792307	0.902904	1.03004	1.17003	1.3098	1.48296	1.67648	1.90892	2.17306	2.51241	2.82817	3.30484	3.79439	4.8162	9.50703	37.8286
0.0355653	0.135739	0.206445	0.248047	0.305859	0.387201	0.462748	0.523036	0.611624	0.720917	0.792604	0.903307	1.034	1.17003	1.31032	1.48328	1.67955	1.91545	2.1732	2.51812	2.82817	3.30936	3.80508	4.83871	9.57152	38.9907
0.035992	0.135929	0.20665	0.248047	0.305859	0.387301	0.463537	0.523489	0.611719	0.720917	0.793181	0.903884	1.03569	1.17003	1.31034	1.48446	1.67969	1.91727	2.18284	2.51944	2.82817	3.30936	3.81724	4.87335	9.57152	39.6394
0.0364639	0.135991	0.206879	0.248047	0.305859	0.38735	0.463893	0.523507	0.611719	0.720917	0.793881	0.904201	1.0362	1.17035	1.31076	1.48828	1.68118	1.91836	2.18385	2.52123	2.83195	3.30936	3.81893	4.88596	9.68654	41.0028
0.036865	0.136223	0.207904	0.248047	0.306412	0.387572	0.464906	0.52385	0.611719	0.720917	0.794137	0.904413	1.03663	1.17071	1.31167	1.48828	1.68297	1.92106	2.18461	2.5227	2.83624	3.30936	3.83646	4.88596	9.70241	42.8483
0.036895	0.136391	0.208066	0.248047	0.306459	0.388245	0.465015	0.523972	0.611719	0.720917	0.794137	0.904454	1.03672	1.17109	1.31183	1.48828	1.68625	1.92453	2.18639	2.52619	2.83978	3.30936	3.85072	4.88596	9.70241	43.0524
0.0369092	0.13652	0.208151	0.248047	0.306621	0.388863	0.465078	0.524054	0.612873	0.720917	0.794137	0.906173	1.03687	1.17156	1.31192	1.48828	1.6866	1.92536	2.18695	2.5283	2.84296	3.30936	3.85072	4.89225	9.77191	43.5469
0.0370963	0.136693	0.208174	0.248047	0.308324	0.388896	0.465412	0.524335	0.613048	0.720917	0.794137	0.90843	1.03883	1.17164	1.31302	1.48828	1.6869	1.92799	2.18705	2.52959	2.8434	3.30936	3.85072	4.89225	9.8378	44.3921
0.037141	0.136768	0.208192	0.248047	0.309015	0.392111	0.465569	0.526187	0.613137	0.720917	0.794137	0.90843	1.03883	1.17216	1.31426	1.48828	1.6869	1.92961	2.18859	2.52959	2.84934	3.30936	3.85072	4.91108	9.84718	44.5277
0.0373261	0.137047	0.208451	0.248047	0.309143	0.392197	0.465717	0.526187	0.616757	0.720917	0.794137	0.90843	1.03883	1.17221	1.31692	1.48828	1.6869	1.93204	2.18903	2.52959	2.84963	3.30936	3.85072	4.92359	9.92807	45.2242
0.0374823	0.137387	0.208888	0.248047	0.309995	0.392197	0.466562	0.526187	0.617001	0.721131	0.794137	0.909158	1.03887	1.17246	1.31766	1.48828	1.68754	1.93349	2.19156	2.52959	2.84977	3.31095	3.85072	4.92359	9.98678	45.2269
0.0375414	0.137825	0.208979	0.248047	0.310142	0.392197	0.466763	0.526187	0.618479	0.722036	0.794137	0.909304	1.03927	1.17277	1.31768	1.48828	1.68762	1.93498	2.19337	2.52959	2.84993	3.31506	3.86703	4.92359	9.98678	45.6244
0.0376844	0.137835	0.209408	0.248047	0.310561	0.392197	0.467236	0.526187	0.618672	0.722461	0.794137	0.909478	1.03966	1.17371	1.31839	1.48828	1.68893	1.93628	2.1942	2.52959	2.8512	3.32204	3.87082	4.9519	9.99909	46.3257
0.0376921	0.138208	0.209419	0.248047	0.310856	0.392197	0.467643	0.526187	0.618688	0.722461	0.794137	0.910393	1.03972	1.17418	1.31843	1.48828	1.69056	1.93731	2.19444	2.52959	2.85353	3.32376	3.87118	4.96094	10.0727	46.3874
0.0381454	0.138454	0.209668	0.248047	0.311093	0.392197	0.468186	0.526187	0.619266	0.722461	0.794137	0.911023	1.04009	1.17659	1.32072	1.48828	1.6944	1.93731	2.19596	2.52959	2.85996	3.3279	3.87462	4.96094	10.1971	46.6025
0.0385697	0.138889	0.209737	0.248047	0.311224	0.392197	0.468486	0.526187	0.619325	0.722461	0.794137	0.911628	1.04065	1.17659	1.32101	1.48828	1.69492	1.93731	2.19642	2.52959	2.86508	3.3279	3.87633	4.96094	10.1971	47.1113
0.038708	0.13913	0.209912	0.248047	0.311273	0.392197	0.468503	0.526187	0.619474	0.723175	0.794137	0.914393	1.04067	1.17659	1.3244	1.48828	1.69726	1.93731	2.19714	2.52959	2.86557	3.3279	3.87835	4.96713	10.2272	47.4088
0.0387223	0.139594	0.210394	0.248047	0.311486	0.392197	0.468849	0.527258	0.619654	0.723175	0.794137	0.917578	1.0411	1.17659	1.32561	1.48828	1.69745	1.93731	2.1977	2.53018	2.86794	3.33291	3.88255	4.96713	10.2902	47.6482
0.039097	0.139829	0.210601	0.248047	0.311682	0.392197	0.468851	0.527519	0.619931	0.723175	0.794137	0.917578	1.04223	1.17698	1.32622	1.48828	1.69753	1.93731	2.19959	2.53097	2.87528	3.33713	3.88623	4.96713	10.4298	47.8544
0.0392134	0.140043	0.210825	0.248047	0.312025	0.392197	0.469583	0.527854	0.620117	0.723175	0.794137	0.918228	1.04224	1.17887	1.32791	1.49045	1.69838	1.93731	2.20217	2.54133	2.88538	3.33713	3.92197	4.96713	10.4445	48.42
0.0392839	0.140076	0.210972	0.248047	0.312848	0.392197	0.469752	0.529006	0.620117	0.723175	0.79619	0.919167	1.04282	1.18032	1.32821	1.49046	1.6988	1.93731	2.20227	2.54315	2.8927	3.33713	3.92197	4.96713	10.5529	48.5013
0.0399681	0.14028	0.211051	0.248047	0.313157	0.392197	0.469876	0.530297	0.620117	0.723175	0.796279	0.923828	1.04368	1.18074	1.32837	1.49298	1.69951	1.93731	2.20449	2.54404	2.8927	3.33713	3.92197	4.96713	10.5762	49.204
0.0399835	0.140621	0.211623	0.248047	0.313828	0.392197	0.471508	0.531164	0.620117	0.723175	0.796279	0.923865	1.04391	1.18084	1.32977	1.4931	1.70035	1.93731	2.20459	2.5455	2.8927	3.33713	3.92197	4.97578	10.6689	49.2134
0.0400348	0.14139	0.211632	0.248047	0.314211	0.392197	0.472301	0.531164	0.620117	0.723175	0.796279	0.926061	1.04419	1.18159	1.33052	1.49344	1.70199	1.93731	2.20504	2.54714	2.8927	3.33713	3.92197	4.98568	10.7245	49.289
0.0402008	0.141531	0.212135	0.248047	0.314275	0.392197	0.472657	0.531164	0.620117	0.723175	0.796279	0.92729	1.04452	1.18193	1.3313	1.49344	1.70235	1.93731	2.20505	2.54953	2.8927	3.33713	3.92197	4.98568	10.7379	50.4615
0.0402045	0.141667	0.212502	0.248047	0.314492	0.392197	0.472892	0.531164	0.620117	0.723175	0.796279	0.928861	1.04519	1.18505	1.33149	1.49392	1.7033	1.93731	2.20631	2.55015	2.8927	3.33713	3.92197	4.98568	10.8292	50.8647
0.0403694	0.141799	0.212503	0.248047	0.316433	0.392197	0.473317	0.531164	0.620117	0.723175	0.796279	0.930078	1.0458	1.18572	1.33285	1.49532	1.70566	1.93731	2.20912	2.5521	2.8927	3.34196	3.92197	4.99185	10.8971	51.6015
0.040498	0.141977	0.212783	0.248047	0.317092	0.392197	0.473961	0.531164	0.620117	0.723175	0.796279	0.931343	1.04708	1.1869	1.33312	1.49623	1.70608	1.93731	2.21025	2.5538	2.8927	3.3635	3.92197	5.01644	10.9169	51.6301
0.0406383	0.142215	0.212939	0.248047	0.317734	0.392197	0.474003	0.531187	0.620117	0.723175	0.796746	0.932009	1.04948	1.18772	1.33337	1.49667	1.70753	1.93731	2.2108	2.5538	2.89788	3.37105	3.92197	5.01644	10.9169	52.4577
0.040643	0.142283	0.212999	0.248047	0.318181	0.392197	0.474291	0.532047	0.620117	0.723175	0.796746	0.932061	1.04967	1.18897	1.33355	1.49686	1.70998	1.93731	2.21222	2.5538	2.89859	3.3738	3.92197	5.02257	10.9253	52.5602
0.0406542	0.142612	0.213163	0.248047	0.318586	0.392197	0.474506	0.532074	0.620117	0.723175	0.796746	0.932768	1.05	1.1898	1.33393	1.49767	1.71106	1.93731	2.21321	2.5538	2.89909	3.3738	3.92197	5.02257	10.9394	54.0725
0.0408331	0.142691	0.213303	0.248047	0.319158	0.392197	0.475087	0.532083	0.620117	0.723175	0.796846	0.932949	1.05029	1.19144	1.33422	1.49858	1.71376	1.93731	2.21387	2.5538	2.90181	3.3738	3.92197	5.04614	11.0151	54.4829
0.0409405	0.142732	0.213564	0.248047	0.319449	0.392197	0.475087	0.533488	0.620117	0.723175	0.797179	0.932958	1.05059	1.19204	1.33577	1.499	1.71532	1.93731	2.21404	2.5538	2.90331	3.3738	3.92197	5.05918	11.1179	55.4783
0.0410085	0.142763	0.214093	0.248047	0.319626	0.392197	0.475095	0.534308	0.620117	0.723175	0.799094	0.933156	1.05237	1.19277	1.33577	1.50102	1.721	1.93812	2.21408	2.5538	2.91011	3.3738	3.92197	5.0895	11.4129	55.5647
0.0415702	0.142892	0.214245	0.248047	0.320079	0.392197	0.475576	0.53589	0.620117	0.723175	0.799123	0.933419	1.05237	1.19283	1.33577	1.5017	1.7235	1.94016	2.218	2.5538	2.91095	3.3738	3.92197	5.11362	11.4403	56.4572
0.0418474	0.14319	0.214302	0.248047	0.320311	0.392197	0.477635	0.536466	0.620117	0.723175	0.799153	0.93413	1.05237	1.19333	1.33577	1.50259	1.72411	1.9406	2.21802	2.5538	2.91207	3.3738	3.92197	5.11362	11.4774	57.1833
0.0419201	0.143975	0.214838	0.248047	0.320968	0.392197	0.47815	0.536643	0.620117	0.723759	0.802088	0.934493	1.05237	1.19333	1.33577	1.50427	1.72429	1.9415	2.2186	2.5538	2.91237	3.3738	3.94718	5.11362	11.4877	61.2133
0.0420557	0.144018	0.214885	0.248047	0.321791	0.392197	0.478458	0.537762	0.620117	0.723888	0.802176	0.936247	1.05237	1.19364	1.33577	1.50757	1.72476	1.94449	2.2186	2.5538	2.91237	3.37574	3.96875	5.11362	11.5095	65.9497
0.0425167	0.144183	0.215299	0.248047	0.322072	0.392197	0.47879	0.537762	0.620117	0.723901	0.802876	0.93636	1.05237	1.19593	1.33577	1.50881	1.72581	1.94506	2.2186	2.5538	2.91772	3.37601	3.96875	5.16152	11.5415
0.0426	0.144183	0.215322	0.248047	0.322404	0.392197	0.478818	0.537762	0.620117	0.724169	0.804769	0.938974	1.05237	1.1965	1.33577	1.50881	1.72745	1.94619	2.2188	2.5538	2.92491	3.38333	3.96875	5.17937	11.8009
0.0431662	0.144183	0.215702	0.248047	0.322404	0.392197	0.480279	0.537762	0.620117	0.724556	0.804913	0.938974	1.05237	1.19975	1.33577	1.50881	1.72767	1.94632	2.21954	2.5538	2.9324	3.38597	3.96875	5.17937	11.8571
0.0435271	0.144183	0.21588	0.248047	0.322404	0.392197	0.480456	0.537762	0.620117	0.724752	0.80568	0.938974	1.05237	1.19991	1.33577	1.50881	1.72856	1.948	2.21964	2.5538	2.93514	3.40025	3.96875	5.20898	11.87
0.0439374	0.144183	0.215996	0.248047	0.322404	0.392464	0.480459	0.537762	0.620117	0.725456	0.806116	0.939239	1.05237	1.20168	1.33577	1.50881	1.7288	1.94898	2.22032	2.5538	2.93653	3.40675	3.97649	5.25602	12.1239
0.0445182	0.144183	0.216555	0.248047	0.322404	0.393202	0.480633	0.538074	0.620117	0.725883	0.80803	0.939353	1.05237	1.20303	1.33577	1.50881	1.72915	1.9508	2.22106	2.55534	2.93728	3.41318	3.97649	5.26187	12.1619
0.044636	0.144183	0.216968	0.248047	0.322404	0.393498	0.483936	0.540701	0.620117	0.72617	0.808055	0.939961	1.05237	1.20316	1.33577	1.50881	1.72934	1.95289	2.22454	2.55563	2.9413	3.41342	3.97649	5.27355	12.2149
0.0446899	0.144183	0.217108	0.248047	0.322404	0.393715	0.483966	0.542722	0.620117	0.72737	0.808981	0.939961	1.05237	1.20413	1.33577	1.50881	1.73138	1.95431	2.22462	2.55797	2.94508	3.41609	3.99964	5.27355	12.2551
0.0449715	0.144183	0.217116	0.248047	0.322404	0.393922	0.485102	0.54285	0.620117	0.72827	0.809099	0.94106	1.05251	1.20635	1.33577	1.50881	1.73138	1.95453	2.22547	2.56041	2.95186	3.41724	3.99964	5.2948	12.3352
0.0451304	0.144183	0.217116	0.248047	0.322404	0.394486	0.485111	0.543803	0.620117	0.728323	0.810989	0.941241	1.05351	1.20684	1.33577	1.50881	1.73157	1.95512	2.22634	2.56109	2.95316	3.4179	3.99964	5.30843	12.4123
0.045339	0.144183	0.217293	0.248047	0.322404	0.394635	0.485488	0.543922	0.620117	0.728452	0.813787	0.941321	1.05563	1.20714	1.33577	1.50881	1.7332	1.95577	2.22715	2.56334	2.95764	3.45489	3.99964	5.32579	12.4248
0.0454847	0.144183	0.217375	0.248047	0.322404	0.39466	0.485604	0.544936	0.620117	0.728676	0.814884	0.943158	1.05606	1.2075	1.33577	1.50881	1.73552	1.95668	2.22757	2.56446	2.95941	3.45489	3.99964	5.3546	12.5943
0.0456266	0.144183	0.217535	0.248047	0.322404	0.396011	0.485899	0.545353	0.620117	0.728896	0.815625	0.943285	1.05879	1.20752	1.33577	1.50881	1.73633	1.95846	2.22866	2.56808	2.96374	3.45489	4.00732	5.3546	12.6309
0.0456467	0.144183	0.217581	0.248047	0.322404	0.396126	0.486705	0.546031	0.620117	0.729145	0.815625	0.944534	1.05898	1.20787	1.33577	1.50881	1.73633	1.95938	2.2296	2.57927	2.9689	3.45695	4.00732	5.46267	12.6601
0.0459049	0.144183	0.217645	0.248047	0.322404	0.397289	0.486872	0.546857	0.620117	0.729163	0.815625	0.944534	1.05966	1.20797	1.33577	1.50881	1.73633	1.95942	2.23034	2.58103	2.96958	3.45758	4.00732	5.4711	12.7159
0.0459557	0.144183	0.217958	0.248047	0.322404	0.397466	0.487858	0.54692	0.620117	0.729383	0.815653	0.944534	1.05966	1.20805	1.33577	1.50881	1.73633	1.96098	2.2308	2.58492	2.97441	3.46017	4.00732	5.49075	12.8051
0.0460308	0.144183	0.218079	0.248047	0.323818	0.397673	0.488439	0.547303	0.620117	0.730184	0.815897	0.944534	1.06233	1.20817	1.33577	1.50881	1.73633	1.96098	2.23105	2.58827	2.97656	3.462	4.00732	5.49075	12.8052
0.0461561	0.144183	0.218301	0.248047	0.324131	0.398081	0.488711	0.54899	0.620117	0.730205	0.818615	0.944534	1.06304	1.20879	1.33577	1.50881	1.73633	1.96098	2.23242	2.58879	2.97656	3.4628	4.00732	5.50753	12.9365
0.0465339	0.144183	0.218683	0.248047	0.324988	0.398574	0.489278	0.549034	0.620117	0.731578	0.81965	0.9459	1.06393	1.21082	1.33577	1.50959	1.73633	1.96111	2.23242	2.58969	2.97656	3.46702	4.01172	5.62361	13.0148
0.0467055	0.144183	0.219202	0.248047	0.325018	0.398926	0.489709	0.549034	0.620117	0.732397	0.821319	0.946191	1.06408	1.21124	1.33577	1.51148	1.73633	1.96142	2.23242	2.58969	2.97739	3.46747	4.01508	5.65502	13.0714
0.0469228	0.144183	0.219208	0.248047	0.32536	0.399053	0.489709	0.549034	0.620117	0.732571	0.821972	0.946615	1.06442	1.21456	1.33577	1.51153	1.73749	1.96208	2.23242	2.58969	2.97871	3.47266	4.01828	5.65634	13.1066
0.0470977	0.144183	0.219409	0.248047	0.325861	0.399085	0.489709	0.549034	0.620117	0.733242	0.821972	0.946891	1.06442	1.21464	1.33577	1.51172	1.73813	1.96438	2.23242	2.58969	2.98452	3.47266	4.02988	5.65634	13.1675
0.0471452	0.144183	0.219668	0.248047	0.325955	0.399478	0.489709	0.549034	0.620117	0.733579	0.821972	0.950175	1.0655	1.21577	1.33577	1.51405	1.73925	1.96472	2.23242	2.58969	2.98688	3.47266	4.03791	5.71047	13.3347
0.0471658	0.144183	0.219805	0.248047	0.326296	0.399608	0.489709	0.549034	0.620117	0.735194	0.822666	0.950255	1.06551	1.21634	1.33577	1.51405	1.73932	1.96529	2.23242	2.58969	2.98688	3.47266	4.03791	5.75635	13.3508
0.0471935	0.144183	0.219879	0.248047	0.32659	0.399772	0.489709	0.549034	0.620117	0.735194	0.822687	0.950656	1.06689	1.21663	1.33577	1.51405	1.73945	1.96555	2.23242	2.58969	2.98688	3.47266	4.03791	5.76942	13.5702
0.0472673	0.144183	0.219997	0.248047	0.329051	0.400023	0.489709	0.549034	0.620117	0.735194	0.822779	0.951697	1.06689	1.21799	1.33577	1.51408	1.74025	1.96602	2.23242	2.58969	2.98688	3.47266	4.0407	5.83833	13.9105
0.047646	0.144183	0.220149	0.248047	0.329325	0.400471	0.489709	0.549034	0.620157	0.73664	0.823872	0.952853	1.06689	1.21801	1.33577	1.51564	1.74026	1.96602	2.23242	2.58969	2.98688	3.47635	4.04602	5.88033	13.9701
0.0477105	0.144183	0.220173	0.248047	0.330044	0.400764	0.489709	0.549034	0.621423	0.736929	0.825145	0.95295	1.06689	1.21885	1.33577	1.51798	1.74075	1.96604	2.23567	2.58969	2.98688	3.4815	4.0627	5.90924	14.5229
0.0477548	0.144183	0.220207	0.248047	0.330143	0.400849	0.489709	0.549034	0.622304	0.737423	0.827044	0.954878	1.06689	1.21889	1.33577	1.51803	1.74075	1.968	2.23586	2.59086	2.98688	3.4815	4.06827	5.96345	14.5906
0.0479669	0.144183	0.220349	0.248047	0.330549	0.402057	0.489709	0.549043	0.623067	0.737537	0.827732	0.955728	1.06689	1.21897	1.33577	1.5187	1.74655	1.96815	2.23678	2.59121	2.98688	3.4815	4.06827	5.97376	14.5927
0.0481883	0.144515	0.220466	0.248047	0.330561	0.402064	0.489709	0.549571	0.62308	0.737585	0.827876	0.956483	1.06689	1.22149	1.33577	1.52047	1.74675	1.96899	2.23898	2.59224	2.98688	3.4815	4.07294	5.99432	14.6684
0.0482509	0.144856	0.220699	0.248047	0.330562	0.402194	0.491106	0.549939	0.623349	0.73767	0.83007	0.956926	1.06689	1.22283	1.33577	1.52371	1.74687	1.96903	2.2439	2.59578	2.98688	3.4815	4.07908	6.03524	14.7374
0.0482545	0.144989	0.22092	0.248047	0.3306	0.402943	0.491393	0.550508	0.623817	0.738708	0.830833	0.957343	1.06689	1.22537	1.33577	1.52497	1.74712	1.9701	2.24397	2.59762	2.99529	3.4815	4.09317	6.04034	15.4448
0.0483426	0.145653	0.220971	0.248047	0.330899	0.403075	0.49168	0.550605	0.62413	0.739443	0.831403	0.957569	1.06689	1.22561	1.33577	1.5284	1.75024	1.97271	2.24616	2.60299	2.99716	3.4815	4.10591	6.08094	15.5242
0.0490873	0.145658	0.221451	0.248047	0.332034	0.403252	0.491875	0.552023	0.627913	0.739919	0.831744	0.957569	1.06689	1.22768	1.33597	1.52942	1.75062	1.97323	2.24616	2.60509	2.99716	3.48573	4.10591	6.20117	15.6663
0.0492829	0.145728	0.221466	0.248047	0.332624	0.404716	0.493163	0.552491	0.628049	0.740219	0.831975	0.957569	1.06689	1.22768	1.33654	1.53057	1.75191	1.97414	2.24616	2.60635	2.99716	3.48876	4.15802	6.22098	15.7992
0.0494567	0.1463	0.221786	0.248047	0.332884	0.406626	0.493341	0.55465	0.62916	0.740644	0.831975	0.957569	1.06689	1.22777	1.33826	1.5312	1.75312	1.9754	2.24616	2.60856	2.99716	3.49068	4.2168	6.22098	15.9388
0.0498421	0.146374	0.222066	0.248047	0.332916	0.406649	0.496002	0.55465	0.629659	0.741107	0.831975	0.957656	1.06895	1.22777	1.3388	1.53131	1.75359	1.97569	2.24616	2.6095	2.99716	3.50791	4.2168	6.27514	16.0024
0.0500849	0.146924	0.222256	0.248047	0.334337	0.406933	0.496094	0.55465	0.629676	0.74223	0.831975	0.960241	1.0693	1.23015	1.33885	1.5314	1.75396	1.976	2.24616	2.61472	2.99716	3.50791	4.22409	6.28005	16.0848
0.0500905	0.147117	0.222406	0.248047	0.335595	0.40704	0.496094	0.55465	0.629688	0.74223	0.831975	0.960972	1.07088	1.23046	1.34016	1.5314	1.75396	1.97657	2.24616	2.6192	2.99716	3.50791	4.22409	6.28005	16.1992
0.0502404	0.147123	0.222717	0.248047	0.33573	0.40713	0.496094	0.55465	0.631156	0.742873	0.831975	0.961824	1.07172	1.2319	1.34043	1.53233	1.75396	1.97693	2.24616	2.62131	2.99716	3.50791	4.22409	6.32398	16.373
0.0502595	0.148036	0.222801	0.248047	0.335937	0.407185	0.496094	0.55465	0.631329	0.743129	0.832104	0.961824	1.07244	1.2319	1.34105	1.53251	1.75396	1.97701	2.24616	2.62197	2.99716	3.50791	4.22409	6.3531	16.403
0.0503361	0.148094	0.222906	0.248047	0.335937	0.407812	0.496094	0.55465	0.632253	0.743154	0.832618	0.961824	1.07245	1.23229	1.34228	1.53409	1.75396	1.97788	2.24616	2.62432	2.99716	3.50791	4.22409	6.40134	16.4423
0.0503793	0.148103	0.222978	0.248171	0.335938	0.407812	0.496094	0.55465	0.632398	0.743306	0.83355	0.962627	1.07276	1.23258	1.34275	1.53411	1.75396	1.9808	2.24701	2.62527	2.99716	3.50791	4.22409	6.45399	16.448
0.0507257	0.148478	0.223472	0.248314	0.335938	0.407812	0.496094	0.55465	0.632398	0.743535	0.834634	0.964549	1.0728	1.23388	1.34304	1.53458	1.75396	1.98197	2.24714	2.62984	2.99716	3.50791	4.22409	6.49201	16.4909
0.0512588	0.14849	0.223681	0.248344	0.335938	0.407812	0.496094	0.55465	0.632398	0.744141	0.834996	0.964738	1.07386	1.23484	1.34375	1.53485	1.75396	1.98265	2.24886	2.6304	3.00075	3.50791	4.23058	6.49201	16.7372
0.0512661	0.148583	0.224378	0.248398	0.335938	0.407812	0.496094	0.55465	0.632398	0.744141	0.837127	0.964898	1.07552	1.23756	1.34417	1.53719	1.75396	1.98387	2.24888	2.63677	3.00739	3.50791	4.24588	6.51094	16.9781
0.0515424	0.14881	0.224793	0.250074	0.335938	0.407812	0.496094	0.55465	0.632398	0.744141	0.838092	0.965948	1.07552	1.23787	1.347	1.53761	1.75396	1.98438	2.25089	2.64008	3.0075	3.50791	4.24588	6.60476	17.135
0.0516219	0.149157	0.224874	0.251719	0.336253	0.407812	0.496094	0.55465	0.632398	0.744141	0.83815	0.967212	1.07552	1.23922	1.34811	1.53841	1.75396	1.98438	2.25284	2.64027	3.01189	3.50791	4.24588	6.61872	17.221
0.0521431	0.149422	0.225174	0.251953	0.336282	0.407812	0.496094	0.55465	0.632398	0.744141	0.839844	0.967732	1.07552	1.23995	1.34954	1.53867	1.75396	1.98438	2.25405	2.64218	3.01191	3.51831	4.24588	6.61872	17.278
0.0523282	0.149427	0.226051	0.251953	0.337727	0.407812	0.496094	0.55465	0.632398	0.744141	0.839844	0.968654	1.07552	1.24023	1.35291	1.53969	1.75396	1.98438	2.25433	2.64481	3.01762	3.51882	4.26756	6.67887	17.3367
0.0524128	0.149602	0.226145	0.251953	0.33868	0.407812	0.496094	0.55465	0.632398	0.744141	0.839844	0.968654	1.07552	1.24023	1.35305	1.5405	1.75396	1.98438	2.25511	2.64828	3.01762	3.53179	4.26756	6.67887	17.4164
0.0524877	0.1497	0.226319	0.251953	0.339508	0.407812	0.496094	0.55465	0.632398	0.744141	0.839844	0.968654	1.07555	1.24023	1.35425	1.54096	1.75396	1.98438	2.25536	2.65083	3.01762	3.53321	4.26756	6.67887	17.4287
0.0525152	0.149833	0.226604	0.251953	0.339523	0.407812	0.496094	0.55465	0.632398	0.744141	0.840727	0.968654	1.07698	1.24023	1.35618	1.54177	1.75396	1.98438	2.25996	2.65351	3.01762	3.53327	4.26756	6.67887	17.5553
0.0525865	0.149926	0.227974	0.251953	0.339999	0.407812	0.496094	0.55465	0.632398	0.744141	0.841174	0.968654	1.07785	1.24023	1.35647	1.5425	1.75396	1.98438	2.26459	2.65625	3.01762	3.53672	4.26756	6.67887	17.627
0.052923	0.150427	0.227974	0.251953	0.34104	0.407812	0.496094	0.55465	0.632398	0.744141	0.842195	0.968654	1.07792	1.24023	1.35689	1.54351	1.75396	1.98438	2.26515	2.66371	3.01762	3.53939	4.26756	6.70186	17.627
0.0531104	0.15046	0.227974	0.251953	0.341134	0.407812	0.496094	0.55465	0.632398	0.744141	0.842236	0.968654	1.07803	1.24023	1.36017	1.54392	1.75396	1.98438	2.26525	2.66379	3.01927	3.54392	4.26756	6.71561	17.7488
0.0531553	0.150549	0.227974	0.252084	0.341736	0.407812	0.496094	0.55465	0.632398	0.744141	0.84246	0.968654	1.07841	1.24023	1.36059	1.54607	1.75396	1.98438	2.26809	2.66452	3.02367	3.55149	4.26756	6.73848	17.7523
0.0532419	0.150717	0.227974	0.252673	0.34175	0.407812	0.496094	0.55465	0.632398	0.744141	0.842602	0.969322	1.07914	1.24023	1.36253	1.54685	1.75396	1.98438	2.27121	2.66457	3.02539	3.55149	4.26756	6.7476	17.7575
0.0533608	0.150785	0.227974	0.253353	0.341781	0.407813	0.496094	0.55465	0.632398	0.744141	0.842886	0.969323	1.08022	1.24023	1.36275	1.54883	1.75396	1.98438	2.27221	2.67155	3.0278	3.55149	4.26756	6.7476	17.8214
0.0534623	0.150955	0.227974	0.253569	0.342022	0.407813	0.496094	0.55465	0.632398	0.744141	0.842953	0.971141	1.08037	1.24023	1.36303	1.5491	1.75396	1.98438	2.27223	2.67155	3.0278	3.55832	4.28195	6.77036	17.8594
0.0537594	0.151017	0.227974	0.253797	0.342532	0.407813	0.496094	0.55465	0.632398	0.744141	0.843087	0.972967	1.08066	1.24023	1.36331	1.54966	1.75396	1.98438	2.27274	2.67155	3.0278	3.56118	4.30472	6.7749	17.8818
0.0539774	0.151051	0.227974	0.254102	0.342715	0.407813	0.496094	0.55465	0.632398	0.744141	0.843318	0.973058	1.08103	1.24023	1.36389	1.55213	1.75396	1.98438	2.27366	2.67155	3.0278	3.56338	4.33195	6.81113	17.8869
0.0543073	0.151348	0.227974	0.254839	0.343131	0.407813	0.496094	0.55465	0.632398	0.744141	0.844033	0.97471	1.08239	1.24023	1.36646	1.55282	1.75396	1.98438	2.27565	2.67155	3.0278	3.57671	4.33195	6.96301	17.8904
0.054488	0.151411	0.227974	0.255272	0.343596	0.407813	0.496094	0.55465	0.632398	0.744141	0.845035	0.97586	1.08355	1.24023	1.36647	1.5529	1.75396	1.98438	2.27813	2.67155	3.0278	3.57738	4.33546	7.01583	17.9024
0.0550386	0.151526	0.227974	0.255432	0.344097	0.407813	0.496094	0.55465	0.632403	0.744141	0.84655	0.976775	1.08741	1.24023	1.36717	1.55401	1.75396	1.9851	2.28688	2.67155	3.0278	3.57738	4.33905	7.02021	17.9693
0.0550664	0.151796	0.227974	0.255543	0.344421	0.40815	0.496094	0.55465	0.632587	0.744141	0.846931	0.97679	1.08832	1.24023	1.36728	1.55681	1.75396	1.98523	2.28688	2.67155	3.0278	3.58212	4.33905	7.02021	18.0581
0.0551681	0.151907	0.227974	0.255594	0.34486	0.408278	0.496094	0.55465	0.632986	0.744141	0.848588	0.977266	1.09083	1.24023	1.36738	1.55767	1.75396	1.98647	2.28688	2.67155	3.02833	3.58938	4.36194	7.02459	18.1074
0.0554657	0.152194	0.227974	0.255749	0.345323	0.409143	0.496094	0.55465	0.633657	0.744141	0.849089	0.977378	1.09309	1.24023	1.36763	1.55914	1.75396	1.98792	2.28688	2.67155	3.03513	3.59561	4.36682	7.23175	18.1227
0.0554944	0.152876	0.227974	0.256184	0.346041	0.409818	0.496094	0.55465	0.634134	0.744141	0.850602	0.978174	1.09338	1.24023	1.36779	1.55958	1.75396	1.98913	2.28688	2.67155	3.0387	3.59649	4.37809	7.26146	18.2411
0.0556867	0.152956	0.227974	0.256296	0.346176	0.410388	0.496094	0.55465	0.635287	0.744141	0.850661	0.978294	1.09357	1.24023	1.36983	1.5605	1.75396	1.99005	2.28688	2.67156	3.03872	3.59812	4.3954	7.29528	18.3034
0.0556869	0.152957	0.227974	0.257066	0.346276	0.4112	0.496094	0.55465	0.636	0.744141	0.850931	0.9786	1.094	1.24023	1.36988	1.5622	1.75396	1.9904	2.28688	2.6734	3.03876	3.60602	4.41635	7.29949	18.409
0.0558608	0.153007	0.227974	0.257675	0.346276	0.411957	0.496094	0.55465	0.636736	0.744141	0.851034	0.978866	1.09502	1.24023	1.36988	1.5622	1.75396	1.99052	2.28688	2.67561	3.03933	3.60966	4.41635	7.29949	18.4157
0.0558885	0.153139	0.227974	0.257782	0.346276	0.412478	0.496094	0.55465	0.636971	0.744141	0.851277	0.978867	1.09502	1.24023	1.36988	1.5622	1.75396	1.99062	2.28753	2.68275	3.04124	3.61162	4.41635	7.29949	18.4241
0.0560457	0.153591	0.227974	0.257916	0.346276	0.41428	0.496094	0.55465	0.639606	0.744141	0.851432	0.979418	1.09669	1.24023	1.36988	1.56415	1.75396	1.9929	2.28804	2.68304	3.05658	3.61162	4.41635	7.37496	18.5107
0.0562134	0.153655	0.227974	0.258256	0.346276	0.416922	0.496094	0.55465	0.639606	0.744141	0.851526	0.979418	1.09685	1.24023	1.36988	1.56508	1.75396	1.99641	2.28954	2.68304	3.06052	3.61162	4.41635	7.39995	18.5107
0.0569839	0.153783	0.227974	0.258973	0.346276	0.416946	0.496094	0.55465	0.639606	0.744141	0.851916	0.979418	1.09769	1.24023	1.36988	1.56669	1.75396	1.99967	2.29054	2.68304	3.06817	3.61162	4.42661	7.43313	18.5107
0.0571222	0.153864	0.227974	0.259123	0.346276	0.417222	0.496094	0.55465	0.640111	0.744141	0.852481	0.979648	1.09807	1.24023	1.3703	1.56724	1.75396	1.99972	2.29279	2.68304	3.06817	3.61512	4.44974	7.45792	18.5306
0.0571506	0.15395	0.227974	0.259269	0.346276	0.418133	0.496094	0.55465	0.641418	0.744141	0.852899	0.98208	1.09807	1.24023	1.37043	1.56742	1.75396	1.99982	2.2933	2.68881	3.06817	3.63153	4.46484	7.46205	18.6481
0.0572957	0.153975	0.227974	0.259484	0.346276	0.418174	0.496094	0.55465	0.641421	0.744141	0.853285	0.982229	1.09807	1.24023	1.37164	1.56752	1.75396	1.99982	2.29558	2.69437	3.06817	3.63651	4.46484	7.49906	18.6712
0.0573714	0.154179	0.227974	0.260574	0.346276	0.419681	0.496094	0.55465	0.643173	0.744141	0.855479	0.983012	1.09807	1.24023	1.37217	1.56879	1.75396	1.99982	2.29614	2.69749	3.06991	3.64274	4.47173	7.49906	18.6761
0.0574161	0.154716	0.227974	0.260904	0.346276	0.419889	0.496094	0.55465	0.644322	0.744141	0.855538	0.983012	1.09827	1.24023	1.3733	1.56879	1.75396	1.99982	2.29698	2.69902	3.09138	3.65028	4.47173	7.49906	18.6975
0.0575817	0.154842	0.227974	0.261784	0.346276	0.419922	0.496094	0.55465	0.644808	0.744141	0.855898	0.983012	1.09865	1.24023	1.37353	1.56879	1.75396	1.99982	2.29718	2.70136	3.1047	3.65463	4.47173	7.53181	18.6978
0.0577052	0.154868	0.227974	0.261866	0.346276	0.419922	0.496094	0.55465	0.644808	0.744141	0.856625	0.983144	1.09871	1.24023	1.37405	1.56879	1.75396	1.99982	2.29908	2.70958	3.10607	3.66237	4.47173	7.54405	18.7127
0.0578946	0.155579	0.227974	0.26211	0.346276	0.419922	0.496094	0.55465	0.644808	0.744141	0.857456	0.98452	1.09887	1.24023	1.37406	1.56879	1.75396	1.99982	2.29942	2.71135	3.10802	3.66341	4.47173	7.69345	18.7206
0.0579014	0.156223	0.227974	0.262324	0.346316	0.419922	0.496094	0.55465	0.647012	0.744141	0.85754	0.984796	1.09991	1.24023	1.37453	1.56879	1.75396	1.99982	2.3015	2.71291	3.10802	3.6656	4.47173	7.70544	18.7632
0.0580272	0.156288	0.227974	0.262355	0.346568	0.419922	0.496094	0.55465	0.647898	0.744141	0.858214	0.986583	1.10111	1.24023	1.37456	1.56879	1.75396	1.99982	2.3035	2.71511	3.10802	3.68329	4.47173	7.72538	18.7682
0.0582908	0.156384	0.227974	0.262482	0.346578	0.419922	0.496094	0.55465	0.647932	0.744141	0.858261	0.98667	1.1014	1.24023	1.37595	1.56879	1.75396	1.99982	2.30732	2.71659	3.10802	3.6852	4.47173	7.7532	18.7744
0.0584387	0.156516	0.227974	0.262649	0.346938	0.419922	0.496094	0.55465	0.648982	0.744141	0.858767	0.988915	1.10167	1.24023	1.37724	1.56879	1.75396	1.99982	2.30935	2.72106	3.10802	3.68748	4.47602	7.78488	18.7897
0.0586337	0.156608	0.227974	0.262715	0.347636	0.419922	0.496094	0.55465	0.650146	0.744141	0.859022	0.98933	1.10416	1.24023	1.37863	1.56879	1.75396	1.99982	2.3117	2.7262	3.10812	3.68748	4.48239	7.78883	18.8018
0.0591434	0.156844	0.227974	0.26311	0.347712	0.419922	0.496094	0.55465	0.651586	0.744141	0.860158	0.989609	1.10464	1.24023	1.37883	1.56879	1.75396	2.00246	2.31188	2.72852	3.10917	3.68748	4.48509	7.84393	18.8025
0.0592744	0.157082	0.228298	0.263184	0.347938	0.419922	0.496094	0.55465	0.651941	0.744141	0.860861	0.989644	1.10633	1.24023	1.37915	1.5711	1.75396	2.00366	2.32052	2.72852	3.11786	3.68748	4.49228	7.88305	18.8063
0.0595015	0.157116	0.228385	0.263357	0.34801	0.419922	0.496094	0.55465	0.652115	0.744141	0.861026	0.990626	1.10634	1.24023	1.37952	1.57227	1.75396	2.00433	2.32083	2.73781	3.12276	3.68748	4.49232	7.92586	18.8189
0.0595179	0.157575	0.228452	0.263783	0.348645	0.419922	0.496094	0.55465	0.652301	0.744141	0.861306	0.991481	1.10752	1.24023	1.37986	1.57325	1.75396	2.00484	2.32391	2.73835	3.13555	3.68748	4.50131	7.94137	18.8336
0.0597464	0.157649	0.228452	0.26431	0.349173	0.419922	0.496094	0.55465	0.652472	0.744474	0.861306	0.991494	1.10773	1.24023	1.38005	1.57406	1.75396	2.00503	2.32456	2.73977	3.13698	3.68748	4.52643	7.95299	18.8533
0.0601262	0.158035	0.228621	0.26452	0.349734	0.419922	0.496094	0.55465	0.652819	0.744646	0.862076	0.992188	1.1088	1.24023	1.38124	1.57467	1.75396	2.00753	2.3277	2.73977	3.13757	3.68748	4.53069	7.99927	18.8628
0.06021	0.158494	0.228838	0.265582	0.349998	0.419922	0.496094	0.55465	0.652819	0.745366	0.862642	0.992188	1.10906	1.24023	1.38208	1.57481	1.75459	2.00803	2.3286	2.73977	3.13757	3.68748	4.54414	8.01464	18.9022
0.0602996	0.15875	0.229191	0.265582	0.350163	0.419922	0.496094	0.55465	0.652819	0.746901	0.86267	0.992188	1.1093	1.24023	1.38429	1.57549	1.75536	2.00913	2.33003	2.73977	3.13757	3.68748	4.56029	8.0682	18.9314
0.0603903	0.158916	0.229225	0.265582	0.350225	0.419922	0.496094	0.55465	0.652819	0.747107	0.863482	0.992188	1.1093	1.24023	1.38487	1.57566	1.75756	2.00919	2.3327	2.73977	3.13757	3.68748	4.56029	8.07963	18.9314
0.060557	0.159035	0.229273	0.265582	0.350494	0.419922	0.496094	0.55465	0.652819	0.74713	0.864086	0.992188	1.1093	1.24023	1.38537	1.57569	1.76072	2.01004	2.33595	2.73977	3.13757	3.70037	4.56029	8.09865	18.9418
0.0607407	0.159211	0.229704	0.265582	0.350791	0.419922	0.496094	0.55465	0.652819	0.749615	0.864096	0.992188	1.1093	1.24023	1.38537	1.5766	1.7612	2.01133	2.33791	2.73977	3.13757	3.70383	4.57376	8.11003	18.946
0.0608925	0.159367	0.230145	0.265582	0.350791	0.419938	0.496094	0.55465	0.652819	0.750774	0.86438	0.992188	1.1093	1.24023	1.386	1.57792	1.76245	2.01174	2.34007	2.73977	3.15138	3.71993	4.57376	8.12519	18.9719
0.0609623	0.159561	0.230246	0.265582	0.350791	0.420364	0.496094	0.55465	0.652819	0.751179	0.864672	0.992188	1.1093	1.24023	1.38643	1.57953	1.76313	2.0123	2.34007	2.73977	3.15712	3.7207	4.57376	8.1592	18.9816
0.061058	0.159673	0.230257	0.265582	0.350791	0.420364	0.496094	0.55465	0.652819	0.751179	0.864672	0.992188	1.1093	1.24023	1.38662	1.57981	1.76394	2.01252	2.34007	2.73997	3.15712	3.7207	4.57376	8.18179	18.9847
0.0611062	0.159705	0.230376	0.265582	0.350791	0.420364	0.496094	0.55465	0.652819	0.751179	0.864672	0.992188	1.1093	1.24023	1.38662	1.58068	1.76435	2.01443	2.34007	2.73999	3.15712	3.7207	4.58399	8.1893	19.0479
0.0611727	0.159908	0.230587	0.265582	0.350791	0.420364	0.496094	0.55465	0.653161	0.751179	0.865212	0.992188	1.1093	1.24023	1.38724	1.58125	1.76532	2.01896	2.34007	2.74021	3.16829	3.7207	4.59187	8.21556	19.0738
0.0612963	0.159963	0.230797	0.265582	0.350791	0.420364	0.496094	0.55465	0.653904	0.751179	0.865499	0.992188	1.1093	1.24023	1.39193	1.58172	1.76711	2.02043	2.34007	2.74521	3.17242	3.7207	4.59616	8.24546	19.0805
0.0613346	0.160226	0.230921	0.265582	0.350791	0.420364	0.496094	0.55465	0.655147	0.75143	0.865554	0.992188	1.1093	1.24023	1.3923	1.5818	1.76893	2.02224	2.34007	2.74911	3.17343	3.7207	4.59882	8.27897	19.2024
0.0614627	0.160334	0.231121	0.265582	0.350791	0.420364	0.496094	0.55465	0.655939	0.751624	0.86563	0.992188	1.1093	1.24023	1.39342	1.58198	1.77245	2.024	2.34007	2.74934	3.17472	3.7207	4.61394	8.27897	19.2935
0.0615937	0.160471	0.231295	0.265582	0.350791	0.420364	0.496094	0.55465	0.655939	0.751663	0.865911	0.992188	1.1093	1.24023	1.39542	1.58444	1.77509	2.02734	2.34007	2.75085	3.17531	3.7207	4.61394	8.31605	19.3445
0.0616596	0.160522	0.23146	0.265634	0.350791	0.420364	0.496094	0.55465	0.655939	0.753114	0.866365	0.992188	1.1093	1.24023	1.39573	1.58459	1.77575	2.02921	2.34007	2.75392	3.17655	3.7207	4.61394	8.31975	19.3731
0.061698	0.160861	0.231698	0.266107	0.350791	0.420831	0.496094	0.55465	0.655939	0.754405	0.867334	0.992188	1.1093	1.24023	1.39712	1.58461	1.77621	2.02986	2.34007	2.75461	3.17655	3.7207	4.6339	8.39337	19.4048
0.0617425	0.161031	0.231786	0.266622	0.350791	0.422777	0.496094	0.55465	0.655939	0.754405	0.867425	0.992188	1.1093	1.24023	1.39778	1.58477	1.77934	2.03305	2.34007	2.7556	3.17655	3.72896	4.6339	8.4263	19.4254
0.0620153	0.161111	0.231878	0.266764	0.350791	0.422923	0.496094	0.55465	0.655939	0.754405	0.867777	0.992188	1.1093	1.24023	1.39778	1.58585	1.7795	2.03311	2.34007	2.75645	3.17655	3.72896	4.6405	8.43359	20.0366
0.0621826	0.161335	0.231895	0.267028	0.350791	0.423489	0.496094	0.55465	0.655939	0.754405	0.868164	0.992188	1.1093	1.24023	1.39923	1.58734	1.7796	2.03337	2.34007	2.7566	3.17655	3.72896	4.66038	8.43359	20.0979
0.0624135	0.161515	0.232053	0.267434	0.350791	0.424479	0.496094	0.55465	0.656551	0.754405	0.868164	0.992188	1.1093	1.24023	1.39974	1.58827	1.78218	2.03339	2.34007	2.76135	3.17655	3.72896	4.66038	8.43359	20.1713
0.0624597	0.161602	0.232363	0.267686	0.350791	0.424998	0.496094	0.55465	0.657684	0.754405	0.868164	0.992188	1.1093	1.24023	1.40046	1.58827	1.78306	2.03395	2.34007	2.76234	3.17655	3.72896	4.68014	8.43359	20.4093
0.0624637	0.161603	0.232431	0.2678	0.350791	0.425046	0.496094	0.55465	0.659841	0.754405	0.868164	0.992188	1.1093	1.24031	1.40263	1.58827	1.78331	2.03414	2.34007	2.76349	3.17682	3.72896	4.68068	8.43724	20.54
0.0627063	0.161645	0.232528	0.268583	0.350791	0.42543	0.496094	0.55465	0.659849	0.754931	0.86851	0.992188	1.1093	1.24078	1.40298	1.58827	1.78532	2.0348	2.34057	2.7713	3.17796	3.75043	4.68641	8.44817	20.6118
0.0627413	0.161648	0.232556	0.269129	0.350791	0.425481	0.496094	0.55465	0.662379	0.755049	0.86869	0.992188	1.1093	1.24229	1.40317	1.58827	1.78633	2.03599	2.34406	2.77232	3.18092	3.75363	4.6899	8.46636	20.6833
0.0628799	0.162097	0.233252	0.269627	0.350791	0.426076	0.496094	0.55465	0.662425	0.755345	0.868894	0.992188	1.10964	1.24355	1.40317	1.58827	1.78787	2.0368	2.34492	2.77325	3.18906	3.75363	4.71289	8.49176	20.7294
0.0628804	0.162249	0.234675	0.269877	0.350791	0.42616	0.496094	0.55465	0.662725	0.755859	0.870138	0.992188	1.11066	1.2445	1.40317	1.58827	1.78869	2.03728	2.3474	2.77325	3.19232	3.75363	4.71289	8.55312	21.1554
0.0629454	0.162381	0.234856	0.270077	0.350791	0.426566	0.496094	0.55465	0.662875	0.755859	0.870429	0.992188	1.11131	1.24506	1.40317	1.58827	1.78869	2.0377	2.34752	2.77325	3.19747	3.75363	4.71289	8.59975	21.2366
0.0632336	0.162721	0.234892	0.270995	0.350791	0.426962	0.496094	0.55465	0.662973	0.756453	0.87075	0.992188	1.11131	1.24642	1.40317	1.58827	1.78869	2.03789	2.34797	2.77325	3.20185	3.75363	4.71289	8.6639	21.3378
0.0636638	0.162761	0.234912	0.271049	0.350791	0.428238	0.496094	0.55465	0.665273	0.757379	0.871088	0.992188	1.11137	1.24642	1.40317	1.58827	1.78869	2.03918	2.34887	2.77325	3.20606	3.75363	4.71941	8.68164	21.6043
0.0636966	0.162772	0.235415	0.27126	0.350791	0.428238	0.496094	0.55465	0.66576	0.758213	0.871088	0.992188	1.112	1.24642	1.40317	1.58827	1.78869	2.0395	2.35318	2.77325	3.22385	3.75363	4.73258	8.68518	21.6952
0.063878	0.162982	0.235622	0.271334	0.350791	0.428238	0.496094	0.55465	0.665827	0.758731	0.871367	0.992188	1.11257	1.24642	1.40317	1.58827	1.78869	2.04012	2.35318	2.77325	3.22461	3.75983	4.73893	8.76978	22.0817
0.0639985	0.16303	0.235963	0.271681	0.350791	0.428238	0.496094	0.554872	0.665929	0.758853	0.871655	0.992188	1.114	1.2476	1.40317	1.58827	1.79022	2.04143	2.35318	2.77325	3.22461	3.76136	4.73893	8.76978	22.0887
0.0640067	0.163432	0.236564	0.271751	0.350791	0.428238	0.496094	0.556926	0.666362	0.758983	0.871919	0.992188	1.11441	1.24852	1.40317	1.58827	1.79028	2.04263	2.35318	2.77325	3.22461	3.764	4.73893	8.77679	22.2594
0.0640348	0.163678	0.236905	0.271808	0.350791	0.428238	0.496094	0.556999	0.667384	0.759255	0.872342	0.992188	1.11462	1.24852	1.40317	1.58827	1.79148	2.04361	2.35318	2.77325	3.22461	3.77814	4.73893	8.7908	22.2966
0.0641521	0.164197	0.237132	0.27244	0.350791	0.428238	0.496094	0.557056	0.667887	0.759659	0.874197	0.992188	1.1156	1.24873	1.40317	1.58827	1.79151	2.04364	2.359	2.77325	3.22461	3.78256	4.76482	8.7978	22.3215
0.0643084	0.164319	0.237135	0.27252	0.350791	0.428238	0.496094	0.55724	0.667887	0.760268	0.874551	0.992188	1.11621	1.24914	1.40317	1.58827	1.79465	2.04442	2.35903	2.77325	3.22461	3.79439	4.76482	8.80828	22.4301
0.0643629	0.164615	0.237171	0.272956	0.350791	0.428238	0.496094	0.557543	0.667887	0.760511	0.874637	0.992188	1.11621	1.24948	1.40317	1.58827	1.79485	2.04545	2.35971	2.77325	3.22461	3.79439	4.76482	8.87439	22.5559
0.0643633	0.164851	0.237257	0.27367	0.350791	0.428238	0.496094	0.558374	0.667887	0.760511	0.874793	0.992188	1.11645	1.24966	1.40317	1.58827	1.79523	2.04545	2.36514	2.77325	3.22461	3.79439	4.76482	8.89171	22.5777
0.0644317	0.164857	0.237291	0.273771	0.350791	0.428238	0.496094	0.558805	0.667887	0.761457	0.875939	0.992188	1.11713	1.24968	1.40346	1.58827	1.79617	2.04545	2.36551	2.77325	3.22461	3.79439	4.77128	8.89171	22.6824
0.0645458	0.16512	0.237544	0.274511	0.350791	0.428238	0.496094	0.560334	0.667887	0.761515	0.876823	0.992188	1.11832	1.25004	1.40481	1.58827	1.79725	2.04545	2.36846	2.77325	3.22461	3.79439	4.77128	8.93313	22.7081
0.0646766	0.165155	0.237544	0.275516	0.350791	0.428238	0.496094	0.562218	0.667887	0.762675	0.876823	0.992188	1.11846	1.25166	1.40545	1.58827	1.79762	2.04545	2.36936	2.77325	3.22461	3.79439	4.77128	8.9469	22.8217
0.0648021	0.16533	0.237544	0.276333	0.350791	0.428238	0.496094	0.562592	0.667887	0.7628	0.876823	0.992188	1.11947	1.25489	1.40563	1.58827	1.80028	2.04545	2.36946	2.77325	3.22686	3.80432	4.77128	8.96407	22.8257
0.0649529	0.165387	0.237544	0.276505	0.350791	0.428238	0.496094	0.562798	0.667887	0.763051	0.876823	0.992188	1.12049	1.25521	1.40651	1.58827	1.80116	2.04545	2.36983	2.77325	3.2305	3.83439	4.79058	8.98464	23.0897
0.0649961	0.165434	0.237544	0.277105	0.350791	0.428238	0.496094	0.563384	0.667887	0.763719	0.876978	0.992188	1.12049	1.25565	1.40655	1.58827	1.80291	2.04545	2.37101	2.77325	3.23153	3.84286	4.79573	9.01882	23.381
0.0651369	0.165456	0.237544	0.277152	0.350791	0.428821	0.496094	0.563384	0.667887	0.765348	0.876978	0.992188	1.12055	1.2557	1.40712	1.58827	1.80339	2.04545	2.37607	2.77325	3.23414	3.84946	4.8162	9.10707	23.5971
0.0651796	0.165486	0.237544	0.277325	0.350791	0.429017	0.496094	0.563384	0.667887	0.766328	0.876978	0.992188	1.12081	1.25624	1.40761	1.58827	1.8041	2.04545	2.37716	2.77325	3.23414	3.85072	4.8162	9.12057	23.6479
0.0651861	0.16552	0.237544	0.277325	0.350791	0.429337	0.496094	0.563384	0.667887	0.7672	0.876978	0.992188	1.12199	1.25663	1.40789	1.58827	1.80493	2.04545	2.37948	2.77325	3.23414	3.85072	4.83546	9.12732	23.8448
0.0652029	0.165597	0.237544	0.277325	0.350791	0.429721	0.496094	0.563384	0.667887	0.768208	0.876978	0.992308	1.12308	1.25666	1.40935	1.58827	1.80581	2.04545	2.38	2.77325	3.23414	3.85072	4.87335	9.14752	24.0298
0.0652162	0.165607	0.237544	0.277325	0.350791	0.430088	0.496094	0.563401	0.667887	0.768221	0.876978	0.992376	1.12394	1.25842	1.40964	1.58827	1.80581	2.04572	2.38141	2.77325	3.23414	3.85072	4.88386	9.15088	24.035
0.0654958	0.165793	0.237544	0.277325	0.350791	0.430852	0.496094	0.563601	0.667887	0.768339	0.876978	0.992858	1.12405	1.25859	1.41037	1.58827	1.80581	2.0463	2.38349	2.77325	3.23414	3.85072	4.89348	9.17773	24.081
0.066216	0.165875	0.237628	0.277325	0.350791	0.430968	0.496094	0.564537	0.667887	0.770101	0.876978	0.99326	1.12524	1.25977	1.41073	1.58827	1.80581	2.04698	2.38429	2.77325	3.23414	3.85072	4.89762	9.19113	24.3756
0.0662859	0.165958	0.237677	0.277325	0.350791	0.431719	0.496094	0.565698	0.667887	0.77227	0.876978	0.993364	1.1254	1.2599	1.41141	1.58827	1.80581	2.04894	2.38453	2.77325	3.23414	3.85072	4.91108	9.23121	24.7699
0.0665721	0.166071	0.237702	0.277325	0.350791	0.431735	0.496094	0.56892	0.667887	0.773877	0.876978	0.993546	1.12558	1.26062	1.4117	1.58827	1.80581	2.04923	2.38601	2.77325	3.23414	3.85072	4.91108	9.23121	24.8493
0.0665793	0.166178	0.237801	0.277325	0.350791	0.431807	0.496417	0.569123	0.667887	0.774298	0.876978	0.993829	1.12611	1.26069	1.41228	1.58827	1.80581	2.05032	2.38614	2.77325	3.23414	3.85072	4.92359	9.23121	24.9543
0.0666582	0.166237	0.237919	0.277325	0.350791	0.43255	0.496587	0.569868	0.668406	0.774298	0.876978	0.995304	1.12625	1.2619	1.41244	1.58827	1.80581	2.05205	2.38986	2.77325	3.23414	3.85072	4.94058	9.26115	24.9753
0.0669848	0.166593	0.238078	0.277325	0.350791	0.43255	0.499546	0.570262	0.669616	0.774298	0.876978	0.995392	1.12634	1.26214	1.41244	1.58827	1.80581	2.05238	2.39131	2.77325	3.23414	3.8587	4.96094	9.28769	24.9753
0.0672579	0.166731	0.23842	0.277325	0.350791	0.43255	0.500401	0.570303	0.670736	0.774298	0.876978	0.996329	1.12653	1.26234	1.41358	1.58827	1.80581	2.05295	2.39269	2.77325	3.25655	3.8587	4.96094	9.32406	25.152
0.0673671	0.166846	0.238557	0.277325	0.350791	0.432739	0.500636	0.570722	0.670904	0.774298	0.876978	0.997501	1.12679	1.26256	1.41408	1.58827	1.80581	2.05384	2.39629	2.77325	3.26255	3.87462	4.96094	9.35041	25.1557
0.0675986	0.166885	0.238762	0.277325	0.350791	0.432775	0.501053	0.570746	0.671684	0.774298	0.876978	0.997751	1.12696	1.26258	1.41408	1.58827	1.80581	2.05431	2.39845	2.77325	3.26255	3.87462	4.96094	9.45511	25.2923
0.0679098	0.167003	0.238889	0.277325	0.350791	0.433884	0.501274	0.570969	0.671875	0.774298	0.876978	0.999335	1.12705	1.26265	1.41435	1.58827	1.80908	2.05461	2.39875	2.77325	3.26255	3.87462	4.96094	9.45511	25.3056
0.0679452	0.167026	0.23894	0.277325	0.350791	0.433942	0.501485	0.571837	0.671875	0.774298	0.876978	0.999909	1.12774	1.26328	1.41454	1.58827	1.80908	2.05519	2.40004	2.77325	3.26255	3.87462	4.96094	9.49731	25.4051
0.0681876	0.167077	0.238978	0.277325	0.350791	0.434341	0.501903	0.57253	0.671875	0.774848	0.876978	0.999909	1.12798	1.26379	1.41604	1.59099	1.80961	2.05609	2.40102	2.77429	3.26255	3.87462	4.96713	9.50703	25.5717
0.0685558	0.16711	0.239502	0.277325	0.350791	0.43448	0.502844	0.573436	0.672639	0.775673	0.876978	0.999909	1.12798	1.26381	1.41687	1.59175	1.81113	2.05638	2.40383	2.78257	3.26255	3.88255	4.96713	9.50703	25.5921
0.0687168	0.167134	0.239608	0.277325	0.350791	0.434668	0.502948	0.574185	0.675152	0.775939	0.876978	0.999909	1.12805	1.26425	1.41875	1.59234	1.8141	2.05695	2.40737	2.78371	3.26255	3.90293	4.96713	9.64835	25.5921
0.0687963	0.167385	0.239655	0.277325	0.350791	0.435821	0.503783	0.574651	0.675159	0.776149	0.876978	0.999909	1.12836	1.2648	1.4192	1.5924	1.81437	2.05713	2.40923	2.7845	3.26258	3.90367	4.96713	9.67383	25.8267
0.068833	0.167484	0.23985	0.277325	0.350791	0.436181	0.503906	0.576734	0.675547	0.776452	0.877034	0.999909	1.12849	1.2648	1.42004	1.59531	1.81496	2.06024	2.41276	2.80121	3.26648	3.92197	4.98568	9.68654	25.968
0.069065	0.167593	0.23992	0.277325	0.350791	0.437302	0.503906	0.576734	0.675872	0.776452	0.877034	0.999909	1.12885	1.2648	1.42094	1.59578	1.81498	2.06174	2.41695	2.80633	3.2746	3.92197	4.98568	9.72458	26.0744
0.0691095	0.167736	0.240511	0.277325	0.350791	0.437998	0.503906	0.576734	0.676491	0.776452	0.877034	1.00158	1.12906	1.2648	1.42119	1.59582	1.81522	2.06239	2.41727	2.81012	3.29677	3.92197	4.98568	9.87837	26.1781
0.0692136	0.167969	0.24061	0.277325	0.350791	0.439172	0.503906	0.576734	0.677104	0.777743	0.877034	1.0036	1.12929	1.2648	1.42194	1.60067	1.81595	2.06265	2.42163	2.81151	3.30138	3.92197	4.98568	9.8846	26.1804
0.0692252	0.167969	0.240647	0.277325	0.350791	0.439597	0.504028	0.576734	0.67782	0.777831	0.877034	1.00412	1.13051	1.2648	1.42206	1.60068	1.81595	2.06362	2.42541	2.81164	3.30344	3.92197	4.99185	9.90325	26.3841
0.0692581	0.167969	0.240973	0.277325	0.350791	0.440507	0.504415	0.576734	0.678544	0.779636	0.877034	1.00412	1.13224	1.2648	1.42627	1.60085	1.81756	2.06416	2.42617	2.81338	3.30739	3.92197	5.01644	9.92498	26.6105
0.0692772	0.167969	0.24115	0.277325	0.350791	0.440741	0.504679	0.576734	0.679152	0.780461	0.877034	1.00562	1.13261	1.2648	1.42672	1.60382	1.81826	2.06521	2.42737	2.81531	3.30936	3.92197	5.02257	9.92807	26.6809
0.0692865	0.167969	0.241167	0.277325	0.350791	0.441095	0.505314	0.576864	0.6805	0.780593	0.877034	1.00562	1.13282	1.2648	1.42867	1.60428	1.8191	2.06643	2.42859	2.81692	3.30936	3.92197	5.02257	9.93427	27.0007
0.0694581	0.167969	0.241809	0.277325	0.350791	0.442601	0.505433	0.57839	0.680668	0.780645	0.877786	1.0068	1.13356	1.2648	1.42931	1.60572	1.81989	2.06767	2.43019	2.81781	3.30936	3.92197	5.05918	9.94974	27.2592
0.0694731	0.167969	0.24181	0.277325	0.350791	0.442893	0.505923	0.579723	0.681184	0.780829	0.877824	1.0075	1.13392	1.2648	1.42964	1.60645	1.82001	2.06808	2.43264	2.8234	3.31089	3.92197	5.05918	9.94974	27.2908
0.0694955	0.167969	0.241848	0.277325	0.350791	0.443466	0.506023	0.58037	0.681344	0.780933	0.877854	1.00781	1.13585	1.2648	1.4302	1.60678	1.82227	2.06823	2.43423	2.82817	3.31267	3.93295	5.1076	9.9621	27.9546
0.0695067	0.167969	0.242093	0.277325	0.350791	0.444082	0.506248	0.580477	0.681477	0.781335	0.878165	1.00799	1.13675	1.2648	1.4302	1.60688	1.82278	2.07011	2.43667	2.82817	3.31599	3.93451	5.11362	9.99909	28.1869
0.0695843	0.167969	0.242414	0.277325	0.350791	0.444177	0.507235	0.580641	0.681787	0.781815	0.878842	1.00846	1.13715	1.2648	1.43073	1.60804	1.82352	2.07041	2.43667	2.82817	3.3279	3.94762	5.11362	9.99909	28.7092
0.0697948	0.167969	0.243109	0.277325	0.350791	0.444378	0.507256	0.581153	0.682082	0.783464	0.879103	1.00898	1.13834	1.2648	1.43077	1.60848	1.82386	2.071	2.44026	2.82817	3.3279	3.95872	5.11362	10.005	28.9015
0.0698406	0.167969	0.243466	0.277325	0.350791	0.444401	0.509766	0.581425	0.682447	0.784319	0.88083	1.00977	1.13875	1.2648	1.43098	1.60944	1.82467	2.07329	2.44298	2.82817	3.3279	3.96768	5.17937	10.0513	30.1354
0.0700166	0.167969	0.243657	0.277325	0.350791	0.444554	0.509766	0.582012	0.683922	0.784393	0.881149	1.01044	1.13984	1.2648	1.43098	1.60992	1.82556	2.07596	2.44298	2.82817	3.32853	3.96875	5.17937	10.0513	30.1762
0.0701983	0.167969	0.243752	0.277325	0.350791	0.444812	0.509766	0.583163	0.683922	0.784393	0.881329	1.01061	1.13987	1.2648	1.43322	1.61028	1.8266	2.07786	2.44298	2.82817	3.33283	3.96875	5.17937	10.1971	30.2627
0.0702893	0.167969	0.244127	0.277325	0.350791	0.444951	0.509766	0.583295	0.683922	0.784393	0.882031	1.01063	1.13987	1.2648	1.43367	1.61051	1.82687	2.07882	2.44298	2.82817	3.33326	3.96875	5.20898	10.2272	31.5498
0.0702925	0.167969	0.244254	0.277325	0.350791	0.445144	0.509766	0.583504	0.683922	0.784393	0.886455	1.01096	1.13987	1.2648	1.43425	1.61098	1.82769	2.07901	2.44298	2.82817	3.33366	3.96875	5.20898	10.2782	31.999
0.0703468	0.167969	0.244396	0.277325	0.350791	0.445187	0.509766	0.584787	0.686088	0.784393	0.88648	1.01124	1.13987	1.2648	1.43478	1.61166	1.82831	2.08267	2.44298	2.82954	3.33713	3.96875	5.20898	10.3449	32.1984
0.0710006	0.167969	0.244426	0.277325	0.350791	0.445635	0.509766	0.585822	0.68648	0.784393	0.888135	1.01131	1.13987	1.2648	1.43487	1.6121	1.8314	2.08592	2.44298	2.83481	3.33713	3.97649	5.25602	10.3587	32.3033
0.0711052	0.167969	0.24455	0.277325	0.350791	0.445684	0.509766	0.586555	0.687361	0.784393	0.88929	1.01196	1.14155	1.2648	1.43513	1.61218	1.83168	2.08841	2.44298	2.83665	3.33713	3.97649	5.25679	10.4209	32.5547
0.071351	0.167969	0.244784	0.277325	0.350791	0.446643	0.509766	0.587129	0.68762	0.784393	0.889774	1.01329	1.14231	1.2648	1.4365	1.61226	1.83293	2.08882	2.44298	2.85125	3.35233	3.97649	5.27355	10.6053	33.2808
0.0714385	0.167969	0.245361	0.277325	0.350791	0.447173	0.509766	0.587875	0.688714	0.784393	0.89023	1.01351	1.14231	1.2648	1.43708	1.6123	1.83307	2.0889	2.44612	2.8541	3.36135	3.97649	5.29138	10.6053	33.3353
0.0718614	0.167969	0.24604	0.277325	0.350791	0.447173	0.509766	0.587891	0.688728	0.784393	0.890438	1.01353	1.14231	1.2648	1.438	1.6123	1.83396	2.08912	2.45046	2.85471	3.36486	3.98609	5.32579	10.6919	33.7672
0.0720785	0.167969	0.246113	0.277325	0.350791	0.447173	0.509766	0.587891	0.689854	0.784393	0.891764	1.01479	1.14231	1.2648	1.43992	1.6123	1.83597	2.0902	2.45155	2.85775	3.3682	3.99964	5.34309	10.9253	33.889
0.0722089	0.167969	0.246366	0.277325	0.350791	0.447173	0.509766	0.587891	0.689882	0.784393	0.892277	1.01514	1.14231	1.2648	1.44058	1.6123	1.83682	2.09092	2.45156	2.87087	3.3738	3.99964	5.36607	10.9253	33.9281
0.0722314	0.167969	0.246587	0.277325	0.350791	0.447173	0.509766	0.589076	0.690356	0.784393	0.892442	1.01691	1.14344	1.2648	1.44183	1.6123	1.83703	2.0919	2.4544	2.87302	3.3738	3.99964	5.41743	10.9506	34.8574
0.0726394	0.167969	0.246603	0.277325	0.350791	0.447173	0.509766	0.590871	0.69041	0.784393	0.892641	1.01739	1.14344	1.2648	1.44225	1.61276	1.83755	2.09318	2.45554	2.87444	3.3738	3.99964	5.46267	10.9647	35.8777
0.0727048	0.167969	0.246735	0.277325	0.350791	0.447173	0.509766	0.592758	0.691064	0.784393	0.892766	1.01782	1.14344	1.2648	1.44286	1.61292	1.83799	2.09482	2.45554	2.88521	3.3738	3.99964	5.47302	11.0513	36.0616
0.0727679	0.167969	0.246764	0.277325	0.350791	0.447173	0.509766	0.593555	0.691862	0.784393	0.89383	1.01833	1.14344	1.2648	1.44361	1.61299	1.83804	2.09849	2.45554	2.89161	3.3738	3.99964	5.47953	11.1159	36.1647
0.0728478	0.168042	0.247102	0.277325	0.350791	0.447173	0.509766	0.593645	0.692102	0.784393	0.894346	1.01892	1.14359	1.2648	1.44415	1.61309	1.83817	2.09856	2.45827	2.89207	3.37694	4.00732	5.47953	11.1649	37.0521
0.0730356	0.16813	0.247193	0.277325	0.350791	0.447173	0.509766	0.593847	0.692234	0.784393	0.894346	1.01943	1.14401	1.2648	1.44454	1.61311	1.83938	2.09898	2.46203	2.8927	3.38023	4.00732	5.49075	11.1731	38.3519
0.0730802	0.168432	0.24745	0.277325	0.350824	0.447173	0.509766	0.593859	0.692267	0.784393	0.894346	1.01953	1.14409	1.2648	1.44531	1.61329	1.84054	2.09934	2.46592	2.8927	3.38962	4.00732	5.65634	11.25	39.1639
0.073159	0.168817	0.247529	0.277325	0.35105	0.447173	0.509766	0.593859	0.692492	0.784393	0.894346	1.01953	1.14485	1.2648	1.44618	1.61329	1.84289	2.09961	2.46592	2.8927	3.39386	4.02357	5.71047	11.3344	39.6355
0.0731634	0.169258	0.247561	0.277325	0.351347	0.447173	0.509766	0.593859	0.692553	0.784393	0.894346	1.01953	1.14489	1.2648	1.44635	1.61329	1.84365	2.10059	2.46905	2.8927	3.39867	4.03791	5.72661	11.349	40.8683
0.0731761	0.169297	0.248001	0.277325	0.351422	0.447173	0.509766	0.593859	0.693981	0.784393	0.894346	1.02017	1.14559	1.2648	1.44635	1.61329	1.84374	2.10106	2.46945	2.8927	3.41732	4.03791	5.75008	11.4344	40.8683
0.0732123	0.169337	0.248015	0.277325	0.351679	0.447173	0.509766	0.593859	0.694517	0.784393	0.894346	1.02042	1.14595	1.2648	1.44635	1.61342	1.84448	2.10113	2.47559	2.8927	3.42503	4.03791	5.7534	11.5095	40.8683
0.0732869	0.169416	0.248047	0.277355	0.352003	0.447173	0.509766	0.593859	0.694578	0.784393	0.894346	1.02096	1.14808	1.2648	1.44635	1.61455	1.84543	2.10214	2.47737	2.8927	3.43652	4.03791	5.76814	11.7082	40.8683
0.0741686	0.169426	0.248047	0.277677	0.352006	0.447173	0.510242	0.593859	0.694618	0.784393	0.894346	1.02142	1.14846	1.2648	1.44635	1.61531	1.84589	2.10308	2.47953	2.8927	3.44856	4.03791	5.76942	11.7528	41.08
0.0741932	0.169493	0.248047	0.277777	0.352012	0.447173	0.510414	0.593859	0.695764	0.784393	0.894346	1.02272	1.15007	1.2648	1.44635	1.61549	1.84669	2.10472	2.48015	2.8927	3.4498	4.03791	5.7854	11.8094	41.2482
0.0742672	0.169684	0.248047	0.278314	0.352176	0.447173	0.51067	0.593859	0.695846	0.784393	0.894346	1.02272	1.15045	1.2648	1.44635	1.61566	1.84829	2.10475	2.48047	2.8927	3.45091	4.05464	5.80663	11.87	41.8384
0.0743653	0.169815	0.248047	0.278487	0.352316	0.447173	0.510857	0.594351	0.696264	0.784393	0.894346	1.02272	1.1512	1.2648	1.44635	1.61568	1.84843	2.10489	2.48047	2.8927	3.45489	4.06827	5.81192	11.9192	42.1074
0.0743761	0.170407	0.248047	0.278577	0.352569	0.447173	0.510857	0.594484	0.701583	0.784393	0.894346	1.02272	1.15226	1.2648	1.44635	1.61593	1.84912	2.10535	2.48047	2.8927	3.45489	4.06902	5.88033	12.2023	42.4472
0.0745034	0.170658	0.248047	0.278626	0.352638	0.447173	0.510857	0.594484	0.701583	0.784393	0.894346	1.02272	1.15434	1.2648	1.44635	1.61611	1.84916	2.10562	2.48047	2.8927	3.45489	4.07733	5.89601	12.2048	42.6193
0.0749468	0.171109	0.248047	0.27912	0.352854	0.447173	0.510857	0.594484	0.701583	0.784393	0.894346	1.02272	1.15447	1.2648	1.44635	1.61626	1.84941	2.10632	2.48047	2.8927	3.45489	4.09089	5.96345	12.2174	43.0259
0.0749633	0.171409	0.248047	0.280648	0.35425	0.447173	0.510857	0.594484	0.701583	0.784393	0.894346	1.02272	1.15465	1.2648	1.44635	1.61707	1.85109	2.10747	2.48047	2.8927	3.45489	4.10591	5.99432	12.3152	43.2804
0.0749829	0.171469	0.248047	0.280677	0.35564	0.447173	0.510957	0.594484	0.701583	0.784393	0.894346	1.02272	1.15476	1.2648	1.44635	1.61743	1.85148	2.1084	2.48047	2.8927	3.45489	4.10591	5.99945	12.3452	43.4995
0.0750638	0.171485	0.248047	0.281184	0.356277	0.447173	0.511362	0.594484	0.701583	0.784393	0.894346	1.02272	1.15511	1.26633	1.44635	1.61891	1.85173	2.1084	2.48047	2.8927	3.46329	4.10591	6.00458	12.4023	44.167
0.0751402	0.17153	0.248047	0.281185	0.356316	0.447623	0.511362	0.594484	0.701583	0.784393	0.894346	1.02272	1.15528	1.26706	1.44635	1.62201	1.85309	2.10938	2.48047	2.8927	3.46785	4.12832	6.03524	12.4568	44.3782
0.0754451	0.171591	0.248047	0.281272	0.356316	0.447825	0.511362	0.594484	0.701583	0.784393	0.894346	1.02272	1.15555	1.26727	1.44635	1.62368	1.85402	2.11185	2.48047	2.8927	3.47266	4.14636	6.04034	12.4914	44.7042
0.0755303	0.171753	0.248047	0.2813	0.356316	0.448684	0.511362	0.594484	0.701583	0.784393	0.894346	1.02272	1.15649	1.26844	1.44635	1.6241	1.8541	2.11204	2.48047	2.89278	3.47266	4.15802	6.08094	12.849	45.0115
0.0755353	0.171894	0.248047	0.281444	0.356316	0.449231	0.511362	0.596359	0.701583	0.784393	0.894346	1.02272	1.1572	1.26953	1.44635	1.62671	1.85628	2.11204	2.48047	2.89614	3.47266	4.15802	6.12631	12.865	45.8142
0.0756651	0.172246	0.248047	0.281519	0.356316	0.450684	0.511362	0.596929	0.701583	0.784393	0.894346	1.02272	1.15882	1.26963	1.44635	1.62721	1.85681	2.11204	2.48047	2.89684	3.47266	4.17887	6.12631	12.9008	45.8887
0.0757457	0.172317	0.248047	0.282167	0.356316	0.451611	0.511362	0.597826	0.701583	0.784393	0.894346	1.02272	1.15959	1.26975	1.44635	1.6278	1.85778	2.11418	2.48047	2.90331	3.47266	4.2168	6.13634	13.0902	46.7205
0.07582	0.172816	0.248047	0.283028	0.356316	0.451741	0.511362	0.598283	0.701583	0.784393	0.894346	1.02272	1.15992	1.26977	1.44635	1.62858	1.8587	2.11511	2.48047	2.90331	3.47688	4.2168	6.20117	13.1066	46.9857
0.0760426	0.173107	0.248047	0.28336	0.356487	0.45227	0.511362	0.598305	0.701583	0.784393	0.894346	1.02272	1.16105	1.26999	1.44635	1.63024	1.85875	2.11525	2.48047	2.90331	3.47848	4.2168	6.22098	13.2305	47.0897
0.0761946	0.173119	0.248047	0.283388	0.357082	0.45227	0.511362	0.598539	0.701583	0.784393	0.894346	1.02272	1.16375	1.27027	1.44635	1.63068	1.85913	2.11931	2.48047	2.90962	3.4815	4.22409	6.32398	13.2792	47.1974
0.0762099	0.173426	0.248047	0.283411	0.357178	0.45227	0.511362	0.598572	0.701583	0.784393	0.894346	1.02272	1.16422	1.27102	1.44635	1.63068	1.86053	2.11931	2.48047	2.91622	3.4815	4.22409	6.43489	13.3577	47.4088
0.0767746	0.17349	0.248047	0.283928	0.357248	0.45227	0.511362	0.599592	0.701583	0.784393	0.894949	1.02272	1.1649	1.27272	1.44635	1.63127	1.86062	2.11931	2.48047	2.92676	3.4815	4.22409	6.43967	13.4152	47.4282
0.0768133	0.173509	0.248047	0.28394	0.357254	0.45227	0.511362	0.601043	0.701583	0.784393	0.895305	1.02272	1.16558	1.27275	1.44635	1.63147	1.86139	2.11931	2.48047	2.9288	3.4815	4.22409	6.43967	13.4884	47.8396
0.0768305	0.173757	0.248047	0.284007	0.35737	0.45227	0.511362	0.601601	0.701583	0.784393	0.895449	1.02272	1.16578	1.27285	1.44635	1.6318	1.86424	2.11931	2.48047	2.92904	3.4815	4.22409	6.45399	13.5066	48.0789
0.0768667	0.173862	0.248047	0.284059	0.358734	0.45227	0.511362	0.602583	0.701583	0.784393	0.895971	1.02279	1.16675	1.27348	1.44635	1.63286	1.86448	2.11931	2.48047	2.92983	3.48831	4.23551	6.46827	13.7526	48.0936
0.0768945	0.173869	0.248047	0.284201	0.359873	0.45227	0.511362	0.603265	0.701583	0.784393	0.896261	1.02389	1.16708	1.27459	1.44635	1.63328	1.86476	2.11931	2.48047	2.93032	3.48857	4.24588	6.46827	13.8196	48.2418
0.07719	0.173938	0.248047	0.28426	0.360106	0.45227	0.511362	0.603648	0.701583	0.784393	0.897315	1.02392	1.16975	1.27635	1.44705	1.63542	1.86476	2.11979	2.48047	2.93564	3.49063	4.24588	6.46827	13.8662	48.3278
0.0771927	0.17413	0.248047	0.284675	0.360544	0.45227	0.511362	0.604171	0.701583	0.784718	0.897841	1.02463	1.17003	1.2769	1.44787	1.63613	1.86556	2.12044	2.48047	2.93627	3.49231	4.24588	6.46827	13.9701	50.3602
0.0772028	0.174301	0.248047	0.285803	0.360871	0.45227	0.511362	0.605268	0.701583	0.784894	0.898327	1.02516	1.17003	1.2769	1.4494	1.63687	1.8671	2.12218	2.48047	2.94261	3.49681	4.2484	6.51094	14.0317	50.3981
0.0774212	0.174328	0.248047	0.286035	0.360898	0.45227	0.511362	0.605293	0.701905	0.785227	0.898487	1.02516	1.17003	1.2769	1.44964	1.6374	1.86719	2.12305	2.48047	2.96087	3.5011	4.26756	6.51094	14.3138	50.6921
0.077571	0.17459	0.248047	0.286038	0.361253	0.45227	0.511362	0.60562	0.702484	0.785976	0.898677	1.02516	1.17003	1.2769	1.44977	1.63767	1.8683	2.12328	2.48047	2.9625	3.50718	4.26756	6.51094	14.4337	51.3607
0.0777337	0.174779	0.248047	0.286172	0.361761	0.45227	0.511362	0.60562	0.70251	0.786708	0.899341	1.02516	1.17003	1.27747	1.44994	1.63818	1.86894	2.12561	2.48047	2.96304	3.50791	4.26756	6.51094	14.7999	52.6911
0.0779093	0.174864	0.248047	0.286267	0.362985	0.45227	0.511362	0.60562	0.703541	0.78758	0.89943	1.02577	1.17003	1.27801	1.45166	1.64208	1.86904	2.12845	2.48047	2.96805	3.50791	4.26756	6.51094	14.9344	52.8014
0.078144	0.175031	0.248047	0.286453	0.363127	0.45227	0.511775	0.60562	0.70363	0.788537	0.900157	1.02583	1.17003	1.27892	1.45349	1.64228	1.87023	2.12983	2.4807	2.96891	3.50791	4.26756	6.59077	15.1329	53.4798
0.0783468	0.175032	0.248047	0.287421	0.363413	0.45227	0.512688	0.60562	0.703738	0.788634	0.90046	1.02617	1.17003	1.27921	1.45403	1.64407	1.87175	2.13053	2.48357	2.96913	3.50791	4.26756	6.67887	15.4388	53.5425
0.0786317	0.175115	0.248047	0.287622	0.363622	0.45227	0.514085	0.607217	0.705518	0.78871	0.900758	1.02718	1.17083	1.27999	1.4554	1.64555	1.87224	2.13115	2.48619	2.97505	3.50791	4.26756	6.67887	15.4687	55.168
0.0786625	0.17533	0.248047	0.287672	0.363667	0.45227	0.514767	0.607312	0.705994	0.789097	0.90156	1.02728	1.17109	1.28082	1.45718	1.6461	1.87341	2.13228	2.48837	2.97656	3.50791	4.26756	6.70186	15.4865	55.8111
0.0791767	0.175331	0.248047	0.287677	0.364466	0.452495	0.514976	0.607557	0.706276	0.790216	0.902405	1.02739	1.17139	1.2809	1.45764	1.64684	1.875	2.13292	2.48879	2.97656	3.50791	4.26756	6.71561	15.4985	57.0885
0.0792501	0.175396	0.248047	0.28823	0.365314	0.452628	0.51548	0.607974	0.707065	0.790287	0.902904	1.02837	1.173	1.28197	1.45827	1.64689	1.8753	2.13364	2.48986	2.97656	3.50791	4.26756	6.7476	15.5242	57.5308
0.0793561	0.175396	0.248047	0.288367	0.36561	0.452818	0.515881	0.610943	0.707173	0.792189	0.902904	1.03024	1.17314	1.28349	1.45906	1.64832	1.87632	2.13378	2.49131	2.97656	3.50791	4.26756	6.77036	15.6191	61.5661
0.0796231	0.175396	0.248047	0.288367	0.365831	0.453022	0.516346	0.61139	0.707333	0.792307	0.902904	1.0303	1.17332	1.28355	1.46078	1.64875	1.87674	2.13378	2.49194	2.97656	3.50797	4.28195	6.81113	15.8478	63.0083
0.0796556	0.175396	0.248047	0.288367	0.365918	0.453074	0.517287	0.611415	0.707548	0.792307	0.902904	1.03088	1.17391	1.28366	1.4636	1.65115	1.87682	2.13378	2.49284	2.97656	3.51561	4.29813	6.82467	15.8478	66.1262
0.0796683	0.175396	0.248047	0.288367	0.366772	0.454106	0.5179	0.611415	0.71194	0.792307	0.902904	1.03097	1.17437	1.28823	1.46409	1.65349	1.87682	2.13378	2.49284	2.97656	3.52541	4.31009	6.86064	15.9928
0.0798543	0.175396	0.248047	0.288367	0.366818	0.454237	0.517965	0.611415	0.712153	0.792307	0.902904	1.03134	1.17547	1.28862	1.4647	1.65363	1.87792	2.13378	2.49284	2.97999	3.52541	4.33195	6.89195	15.9928
0.0802016	0.175396	0.248047	0.288367	0.3675	0.454368	0.518086	0.611415	0.712631	0.792669	0.902904	1.03255	1.17659	1.28901	1.46503	1.65389	1.8791	2.13378	2.49284	2.98101	3.52541	4.33195	6.94974	16.0389
0.0804074	0.175396	0.248047	0.288367	0.367597	0.454654	0.518123	0.611415	0.712631	0.793065	0.902904	1.03265	1.17659	1.28912	1.46552	1.65424	1.87932	2.13378	2.49284	2.98293	3.52541	4.33195	6.98506	16.123
0.0804904	0.175396	0.248047	0.288827	0.367597	0.454756	0.518129	0.611719	0.712892	0.79332	0.902904	1.03349	1.17659	1.28951	1.46635	1.65468	1.87937	2.13378	2.49284	2.98688	3.53556	4.33905	7.01583	16.1973
0.0805465	0.175396	0.248047	0.289147	0.367597	0.455406	0.518275	0.611719	0.713069	0.793646	0.90389	1.0343	1.1769	1.28962	1.46786	1.65527	1.8797	2.13378	2.49284	2.98688	3.53692	4.33905	7.01583	16.3203
0.0807498	0.175396	0.248047	0.289252	0.367597	0.455498	0.518873	0.611719	0.713229	0.79392	0.90414	1.03442	1.17947	1.28965	1.46913	1.65612	1.88036	2.13378	2.49284	2.98688	3.54195	4.35923	7.05082	16.4011
0.0809327	0.175396	0.248047	0.289268	0.367597	0.455564	0.519367	0.611719	0.713672	0.794137	0.904539	1.03514	1.17959	1.29079	1.46913	1.65683	1.88045	2.13378	2.49284	2.98688	3.55149	4.37332	7.21045	16.4909
0.0809907	0.175396	0.248047	0.289381	0.367597	0.455589	0.519478	0.611719	0.715263	0.794137	0.904539	1.03677	1.17994	1.29106	1.46913	1.65717	1.88133	2.13378	2.49284	2.98688	3.55149	4.38487	7.23175	16.5821
0.0811172	0.175396	0.248047	0.289707	0.367597	0.455604	0.519861	0.611719	0.716159	0.794137	0.904591	1.03868	1.18061	1.29148	1.46913	1.65721	1.88231	2.13378	2.49284	2.98688	3.55149	4.38681	7.2445	16.6487
0.0813429	0.175396	0.248047	0.289866	0.367597	0.455695	0.519861	0.611719	0.71728	0.794137	0.904789	1.03946	1.18122	1.29192	1.47018	1.65752	1.88284	2.13378	2.49284	2.98688	3.55149	4.3954	7.2445	16.669
0.0814775	0.175396	0.248047	0.290982	0.367597	0.455948	0.519861	0.611754	0.717563	0.794137	0.905244	1.03953	1.18176	1.29205	1.47036	1.6586	1.88352	2.13378	2.49284	2.98688	3.55149	4.3954	7.26146	16.7537
0.0815204	0.175396	0.248047	0.29128	0.367597	0.455948	0.519861	0.611847	0.717563	0.794137	0.905615	1.03972	1.18205	1.29379	1.47056	1.65968	1.88513	2.13378	2.49284	2.98899	3.55149	4.39613	7.26146	16.869
0.0815359	0.175396	0.248047	0.291876	0.367597	0.455948	0.519861	0.61196	0.717563	0.794137	0.906142	1.03972	1.18323	1.29419	1.47104	1.65997	1.88907	2.13378	2.49284	2.99135	3.55149	4.41635	7.29528	16.9291
0.0818973	0.175396	0.248047	0.29195	0.368199	0.455948	0.519861	0.611978	0.718576	0.794137	0.906534	1.04083	1.18366	1.2943	1.47197	1.66299	1.88907	2.13378	2.4999	2.99493	3.55149	4.41635	7.29528	16.9291
0.0820111	0.175396	0.248047	0.292304	0.368226	0.455948	0.519861	0.612044	0.719419	0.794137	0.90689	1.04143	1.18432	1.29485	1.473	1.66328	1.88907	2.13378	2.50048	2.99595	3.55149	4.41635	7.32474	16.9781
0.0820976	0.175396	0.248047	0.292304	0.369502	0.455948	0.519861	0.612159	0.719688	0.794137	0.907109	1.04394	1.18525	1.29578	1.47308	1.66348	1.88907	2.13516	2.50067	2.99716	3.57443	4.42014	7.32894	16.9781
0.0822158	0.175396	0.248047	0.292543	0.369675	0.455948	0.519861	0.612898	0.72032	0.794137	0.907729	1.04405	1.18665	1.29723	1.47557	1.66395	1.88907	2.13554	2.50128	2.99716	3.57727	4.42696	7.36244	17.0215
0.0822321	0.175396	0.248047	0.29258	0.37013	0.455948	0.519861	0.613382	0.720503	0.794137	0.907884	1.04425	1.18765	1.29746	1.47852	1.66395	1.88907	2.13578	2.50206	2.99716	3.57738	4.4372	7.37496	17.1941
0.0822515	0.175396	0.248047	0.292704	0.370376	0.455948	0.519861	0.613956	0.720889	0.794137	0.90819	1.04475	1.18871	1.29775	1.47918	1.66395	1.88907	2.13614	2.50419	2.99716	3.58215	4.4397	7.39995	17.2031
0.0822631	0.175396	0.248047	0.292716	0.370562	0.455948	0.519861	0.614232	0.720917	0.794137	0.908558	1.04513	1.18897	1.29805	1.47998	1.66395	1.88922	2.13863	2.50521	2.99716	3.58498	4.44504	7.44141	17.2299
0.0822725	0.175396	0.248047	0.292737	0.370724	0.455948	0.519861	0.616832	0.720917	0.794137	0.909203	1.04807	1.18897	1.29813	1.48025	1.66395	1.88946	2.14098	2.50933	2.99716	3.59001	4.45744	7.44554	17.2566
0.0822757	0.175396	0.248047	0.292962	0.370823	0.455948	0.519861	0.616875	0.720917	0.794137	0.909484	1.04819	1.19021	1.29887	1.48103	1.66395	1.89314	2.14156	2.51002	2.99716	3.59242	4.46484	7.45792	17.3065
0.0823898	0.175396	0.248047	0.293511	0.371778	0.455948	0.519861	0.617711	0.720917	0.794137	0.909801	1.04864	1.19049	1.29993	1.48171	1.66395	1.89347	2.14278	2.51252	2.99716	3.6038	4.46484	7.45792	17.4269
0.0824177	0.175396	0.248047	0.293934	0.372049	0.455948	0.519861	0.617849	0.720917	0.794137	0.909888	1.04868	1.19202	1.30379	1.48176	1.66395	1.89367	2.14294	2.51545	2.99716	3.61162	4.47173	7.45792	17.4358
0.0824595	0.175396	0.248047	0.293998	0.37207	0.456214	0.519861	0.618192	0.720917	0.794137	0.910842	1.0495	1.19317	1.30379	1.48204	1.66395	1.89511	2.14949	2.51667	2.99716	3.61162	4.47173	7.46205	17.4587
0.0824675	0.175396	0.248047	0.295083	0.37207	0.456311	0.519861	0.618387	0.720917	0.794137	0.911405	1.04967	1.19321	1.30564	1.48348	1.66395	1.89531	2.15015	2.51806	3.0096	3.61162	4.47173	7.46205	17.471
0.0825366	0.175396	0.248047	0.296694	0.37207	0.45642	0.519861	0.618592	0.720917	0.794137	0.911896	1.04967	1.19333	1.30596	1.48394	1.66395	1.89599	2.15038	2.52009	3.01638	3.61162	4.47173	7.47852	17.5062
0.0832752	0.175396	0.248047	0.296781	0.37207	0.457085	0.519861	0.619123	0.720917	0.794137	0.911896	1.04967	1.19395	1.30617	1.48419	1.66395	1.89643	2.15431	2.52096	3.01762	3.62728	4.47173	7.49906	17.5273
0.08346	0.175396	0.248047	0.296974	0.37207	0.457569	0.519877	0.619474	0.721832	0.79431	0.912804	1.04967	1.19448	1.30736	1.48689	1.66395	1.89644	2.15548	2.52222	3.01762	3.6614	4.47173	7.49906	17.5711
0.0835093	0.175396	0.248047	0.29738	0.37207	0.457855	0.520183	0.620117	0.722064	0.795468	0.91349	1.04978	1.19478	1.30832	1.48761	1.66406	1.89719	2.15666	2.52224	3.01762	3.66237	4.47173	7.54405	17.627
0.0836445	0.175396	0.248047	0.297553	0.37207	0.458498	0.520401	0.620117	0.722373	0.796279	0.914529	1.05237	1.19551	1.30876	1.48828	1.66447	1.89719	2.16293	2.52368	3.01762	3.66237	4.47173	7.59283	17.641
0.0838443	0.175396	0.248047	0.297844	0.37207	0.459025	0.520661	0.620117	0.722461	0.796279	0.915182	1.05237	1.19571	1.30985	1.48828	1.66617	1.89755	2.16598	2.52728	3.01762	3.66237	4.47434	7.64129	17.6532
0.0839684	0.175396	0.248047	0.297915	0.37207	0.460018	0.522442	0.620117	0.722461	0.796279	0.915323	1.05237	1.1958	1.3101	1.48828	1.66696	1.8976	2.16609	2.52782	3.01762	3.67191	4.49232	7.64129	17.6602
0.0839815	0.175396	0.248047	0.297964	0.37207	0.460104	0.52306	0.620117	0.722461	0.796279	0.916335	1.05237	1.19611	1.31032	1.48828	1.66735	1.89795	2.16664	2.52959	3.01762	3.6771	4.49232	7.65738	17.7575
0.0839844	0.175396	0.248047	0.298385	0.37207	0.460351	0.523076	0.620117	0.722461	0.796279	0.917578	1.05237	1.19641	1.31203	1.48828	1.668	1.89829	2.16952	2.52959	3.01762	3.68465	4.49232	7.69345	17.7575
0.0839844	0.175396	0.248047	0.298825	0.37207	0.460865	0.523267	0.620117	0.722461	0.796279	0.917578	1.05237	1.1967	1.31205	1.48828	1.66802	1.89835	2.1708	2.52959	3.02303	3.68748	4.51299	7.70544	17.7834
0.0839844	0.175396	0.248047	0.298874	0.37207	0.462561	0.523568	0.620117	0.722633	0.796966	0.917578	1.05237	1.19674	1.31334	1.48828	1.66856	1.89871	2.17218	2.52959	3.02551	3.68748	4.52643	7.76906	17.7852
0.0839844	0.175396	0.248047	0.299213	0.37207	0.462963	0.524005	0.620117	0.723175	0.797811	0.918727	1.05237	1.19703	1.31376	1.48828	1.66899	1.8988	2.17333	2.52959	3.0278	3.68748	4.52643	7.78488	17.8197
0.0839844	0.175396	0.248047	0.299262	0.37207	0.463486	0.525081	0.620117	0.723175	0.798148	0.919135	1.05237	1.19734	1.31417	1.48828	1.66923	1.8992	2.17481	2.52959	3.0278	3.68748	4.52643	7.78488	17.9024
0.0839844	0.175396	0.248047	0.299758	0.37207	0.463511	0.525555	0.620117	0.723175	0.798523	0.919179	1.05237	1.19738	1.31456	1.48828	1.66965	1.89947	2.17598	2.52959	3.0278	3.68748	4.52643	7.78883	17.9093
0.0839844	0.175396	0.248047	0.299884	0.37207	0.463543	0.525967	0.620117	0.723175	0.798708	0.919302	1.05237	1.19856	1.31638	1.48828	1.67266	1.903	2.17754	2.52959	3.0278	3.68748	4.5299	7.78883	17.9213
0.0839844	0.175396	0.248047	0.300354	0.37207	0.463932	0.52609	0.620117	0.723175	0.798752	0.920361	1.05349	1.19866	1.31839	1.48828	1.67309	1.90369	2.18126	2.52959	3.0278	3.68748	4.53851	7.88305	17.959
0.0839844	0.175396	0.248047	0.30065	0.37207	0.464484	0.526187	0.620117	0.723175	0.799272	0.921167	1.05427	1.19942	1.31839	1.48828	1.67338	1.90387	2.18166	2.52959	3.0278	3.68748	4.55354	7.89475	17.983
0.0839844	0.175396	0.248047	0.300736	0.37207	0.464551	0.526187	0.620117	0.723175	0.799404	0.922713	1.0547	1.20247	1.31922	1.48828	1.67432	1.90437	2.1817	2.52959	3.0278	3.68748	4.56029	7.91032	18.0137
0.0839844	0.175396	0.248047	0.300968	0.37207	0.464911	0.526187	0.620117	0.723175	0.799516	0.92359	1.05486	1.2034	1.31987	1.48828	1.67534	1.90445	2.18361	2.52959	3.0278	3.68748	4.56029	7.92586	18.0376
0.0839844	0.175396	0.248047	0.301014	0.37207	0.464934	0.526187	0.620117	0.723175	0.800913	0.924447	1.05517	1.20368	1.31989	1.48828	1.67648	1.90735	2.18676	2.52959	3.0278	3.7207	4.56214	7.9375	18.0938
0.0839844	0.175396	0.248047	0.301682	0.37207	0.46515	0.526187	0.620117	0.723175	0.802407	0.92505	1.05686	1.20374	1.32006	1.48828	1.67756	1.90812	2.18695	2.52959	3.0278	3.7207	4.56299	7.94137	18.136
0.0839844	0.175396	0.248047	0.30181	0.37207	0.465957	0.526187	0.620117	0.723175	0.80241	0.925165	1.05729	1.20472	1.32101	1.48828	1.67771	1.91103	2.1873	2.52959	3.0278	3.7207	4.56404	7.94137	18.1891
0.0839844	0.175396	0.248047	0.302489	0.37207	0.466017	0.526419	0.620117	0.723175	0.802478	0.925323	1.05764	1.20582	1.32112	1.48828	1.67875	1.9131	2.18881	2.53057	3.0278	3.7207	4.57376	8.00696	18.2411
0.0839844	0.175396	0.248047	0.302557	0.37207	0.466293	0.526562	0.620117	0.723175	0.802513	0.925754	1.05839	1.20596	1.32149	1.48828	1.67962	1.91438	2.1893	2.53124	3.04598	3.7207	4.57376	8.01464	18.2546
0.0839844	0.175396	0.248047	0.302642	0.37207	0.466405	0.528938	0.620117	0.723175	0.802889	0.926003	1.05861	1.20598	1.32175	1.48876	1.68052	1.91554	2.18931	2.53172	3.04773	3.7207	4.57376	8.01464	18.2587
0.0839844	0.175396	0.248047	0.30281	0.37207	0.467493	0.530993	0.620117	0.723175	0.803808	0.926507	1.05927	1.20701	1.3232	1.48893	1.68079	1.91643	2.18945	2.5346	3.05016	3.7207	4.59587	8.09865	18.3018
0.0839844	0.175396	0.248047	0.30281	0.37207	0.468546	0.531164	0.620117	0.723175	0.804493	0.92678	1.05966	1.20791	1.32522	1.48981	1.68228	1.91718	2.19325	2.5361	3.05228	3.7207	4.61394	8.11003	18.3118
0.0839844	0.175396	0.248047	0.30281	0.37207	0.469151	0.531164	0.620117	0.723175	0.804933	0.927019	1.05966	1.21124	1.32526	1.49083	1.68339	1.91724	2.19664	2.54033	3.05251	3.7207	4.61394	8.18179	18.3678
0.0839844	0.175396	0.248047	0.30281	0.37207	0.469172	0.531164	0.620117	0.723175	0.806095	0.928158	1.05966	1.21236	1.3253	1.49291	1.68361	1.91745	2.19669	2.54195	3.0549	3.7207	4.61758	8.18555	18.4374
0.0839844	0.175396	0.248047	0.30281	0.37207	0.469235	0.531164	0.620117	0.723175	0.806809	0.932943	1.05966	1.21303	1.3254	1.49294	1.6869	1.91806	2.19672	2.54337	3.06817	3.72896	4.6339	8.1893	18.4374
0.0839844	0.175396	0.248047	0.30281	0.37207	0.469358	0.531164	0.620117	0.723217	0.807437	0.933132	1.05966	1.21329	1.32593	1.49344	1.68755	1.91819	2.19673	2.54481	3.06817	3.72896	4.6339	8.2193	18.5107
0.0839844	0.175396	0.248047	0.30281	0.37207	0.470897	0.53275	0.620117	0.723609	0.807602	0.93316	1.06019	1.21385	1.32714	1.49344	1.68762	1.92163	2.1977	2.54837	3.06817	3.72896	4.64727	8.24546	18.5107
0.0839844	0.175396	0.248047	0.30281	0.37207	0.471826	0.533934	0.620117	0.723611	0.807645	0.934676	1.06068	1.21387	1.32791	1.49344	1.69105	1.92222	2.19996	2.54855	3.06817	3.72896	4.65231	8.26037	18.569
0.0839844	0.175396	0.248047	0.30281	0.37207	0.472095	0.535371	0.620117	0.724548	0.807815	0.934816	1.06233	1.21473	1.32791	1.49344	1.69166	1.92325	2.20076	2.54987	3.07579	3.72896	4.65342	8.27897	18.6145
0.0839844	0.175396	0.248047	0.30281	0.37207	0.472276	0.536448	0.620117	0.725328	0.808141	0.934863	1.06347	1.21495	1.32791	1.49417	1.69308	1.92339	2.20402	2.55187	3.09242	3.72896	4.66038	8.27897	18.6184
0.0839844	0.175416	0.248047	0.30281	0.37207	0.472995	0.536591	0.620117	0.725949	0.808197	0.935261	1.06357	1.2155	1.32805	1.49527	1.69381	1.92588	2.20489	2.55243	3.09312	3.72896	4.66038	8.29011	18.6217
0.0839844	0.175552	0.248047	0.30281	0.37207	0.474284	0.536796	0.620117	0.726444	0.80823	0.936272	1.0639	1.2159	1.32833	1.4953	1.69416	1.92689	2.20578	2.55348	3.09813	3.7386	4.68014	8.29011	18.6439
0.0839844	0.175775	0.248047	0.30281	0.37207	0.47457	0.537038	0.620117	0.726767	0.808287	0.936591	1.06398	1.21649	1.32907	1.4953	1.69418	1.93043	2.20597	2.5538	3.09936	3.75363	4.6987	8.31605	18.6518
0.0839844	0.17594	0.248047	0.30281	0.372713	0.474611	0.537522	0.620157	0.727636	0.80858	0.937187	1.06428	1.21677	1.32931	1.49571	1.69574	1.931	2.20705	2.5538	3.10219	3.75363	4.70636	8.31605	18.6617
0.0839844	0.176023	0.248047	0.30281	0.372988	0.474686	0.537762	0.620157	0.729045	0.808718	0.937849	1.06442	1.2184	1.32967	1.49717	1.69919	1.93116	2.20731	2.5538	3.10802	3.75363	4.70636	8.36768	18.7492
0.0839844	0.176032	0.248047	0.30281	0.37387	0.475087	0.537762	0.620275	0.729117	0.810192	0.938432	1.06518	1.21854	1.33063	1.49797	1.70187	1.93342	2.20777	2.5538	3.10802	3.75363	4.73893	8.43359	18.7574
0.0839844	0.176127	0.248047	0.30281	0.373899	0.475087	0.537762	0.62074	0.72945	0.81044	0.938974	1.06569	1.21883	1.33106	1.49849	1.70202	1.93427	2.20932	2.5538	3.10802	3.75363	4.73893	8.48451	18.7796
0.0839844	0.176315	0.248047	0.30281	0.374033	0.475309	0.537762	0.62146	0.729515	0.810509	0.938974	1.06574	1.21995	1.33147	1.49886	1.7027	1.93711	2.21305	2.5538	3.10802	3.75363	4.73893	8.48451	18.7801
0.0839844	0.17667	0.248047	0.30281	0.375066	0.475356	0.537762	0.621469	0.73033	0.811504	0.938974	1.06667	1.22038	1.3333	1.50017	1.70375	1.93731	2.21566	2.5538	3.10836	3.75363	4.73893	8.48451	18.8014
0.0839844	0.176835	0.248047	0.303338	0.375384	0.475466	0.537762	0.621667	0.731687	0.812475	0.938974	1.06676	1.22149	1.33346	1.50026	1.70387	1.93731	2.21803	2.5538	3.1117	3.75469	4.76482	8.5675	18.8064
0.0839844	0.176908	0.248047	0.303676	0.375476	0.475637	0.537933	0.622219	0.731901	0.812771	0.938974	1.06689	1.22149	1.33411	1.50045	1.70483	1.93731	2.21821	2.5538	3.11873	3.75746	4.76482	8.59975	18.8485
0.0839844	0.177227	0.248047	0.30427	0.37559	0.47583	0.540129	0.622884	0.732296	0.813062	0.939079	1.06689	1.2223	1.33507	1.50392	1.70524	1.93731	2.2186	2.5538	3.12503	3.77471	4.77128	8.61048	18.8532
0.0839844	0.177407	0.248047	0.304317	0.37559	0.476356	0.54049	0.624472	0.732627	0.813702	0.939674	1.06689	1.2224	1.33567	1.50569	1.70701	1.93731	2.2186	2.5538	3.13282	3.77814	4.77128	8.62832	18.8581
0.0839844	0.177425	0.248047	0.30433	0.37559	0.47651	0.54098	0.624532	0.733442	0.81431	0.939961	1.06689	1.22283	1.33577	1.50718	1.70713	1.93731	2.2186	2.5538	3.13526	3.77814	4.8162	8.6781	18.8777
0.0839844	0.177501	0.248047	0.304366	0.37559	0.477343	0.541322	0.625027	0.734016	0.814878	0.94014	1.06689	1.22283	1.33577	1.50819	1.70788	1.93731	2.22281	2.5538	3.13584	3.77918	4.8162	8.6781	18.9244
0.0839844	0.177564	0.248047	0.305859	0.37559	0.477462	0.542446	0.625179	0.73444	0.815625	0.940335	1.06689	1.22344	1.33577	1.50875	1.70861	1.93731	2.22465	2.5538	3.13757	3.79439	4.8162	8.68164	18.9719
0.0839844	0.177967	0.248047	0.305859	0.37559	0.477464	0.54252	0.625431	0.73497	0.81609	0.94047	1.06689	1.22395	1.33577	1.50881	1.70928	1.93731	2.22637	2.5551	3.13757	3.79439	4.83527	8.68164	19.0848
0.0839844	0.178273	0.248047	0.305859	0.37559	0.477854	0.543218	0.62677	0.735194	0.81634	0.943716	1.06929	1.22404	1.33577	1.50881	1.71027	1.93731	2.22701	2.55539	3.13757	3.79763	4.8424	8.73815	19.1061
0.0839844	0.178356	0.248047	0.305859	0.37559	0.477956	0.543621	0.626941	0.735366	0.816743	0.944534	1.07022	1.22456	1.33577	1.50881	1.71058	1.93731	2.22757	2.55681	3.14626	3.81624	4.85844	8.76978	19.196
0.0839844	0.178467	0.248047	0.305859	0.37559	0.478474	0.543673	0.627947	0.735823	0.816876	0.944534	1.07128	1.22531	1.33577	1.50881	1.71429	1.93731	2.22996	2.55681	3.14795	3.82047	4.89225	8.76978	19.2536
0.0839844	0.178659	0.248047	0.305859	0.37559	0.478604	0.544373	0.627968	0.736111	0.817277	0.944534	1.07208	1.22612	1.33577	1.50881	1.71646	1.93731	2.23106	2.55681	3.15712	3.84768	4.9423	8.76978	19.2536
0.0839844	0.178674	0.248047	0.305859	0.37559	0.479222	0.545026	0.628035	0.736287	0.817869	0.944534	1.07232	1.22616	1.33577	1.50881	1.71706	1.93731	2.23143	2.55879	3.15712	3.85072	4.9423	8.76978	19.3063
0.0839844	0.179272	0.248047	0.305859	0.37559	0.479707	0.545336	0.628142	0.736616	0.818017	0.944534	1.07269	1.22648	1.33577	1.50881	1.71876	1.93731	2.23242	2.55996	3.15755	3.85072	4.96094	8.7978	19.3725
0.0839844	0.179379	0.248047	0.305859	0.37559	0.480601	0.545926	0.629428	0.737527	0.818053	0.945393	1.07287	1.22664	1.33577	1.50881	1.72113	1.93731	2.23242	2.56028	3.16018	3.85072	4.96094	8.80828	19.408
0.0839844	0.179575	0.248047	0.305859	0.37559	0.481116	0.546277	0.629671	0.737967	0.818716	0.945642	1.07425	1.22768	1.33577	1.50881	1.72221	1.93731	2.23242	2.56648	3.1634	3.85072	4.96094	8.85357	19.4254
0.0839844	0.179855	0.248047	0.305859	0.375805	0.481356	0.547569	0.630354	0.73803	0.81968	0.945721	1.075	1.22839	1.33577	1.50881	1.72307	1.93731	2.23242	2.57309	3.16427	3.85072	4.96713	8.89171	19.5328
0.0839844	0.179998	0.248047	0.305859	0.376067	0.482357	0.547873	0.630736	0.738367	0.82022	0.945814	1.07512	1.2293	1.33577	1.50881	1.72347	1.93731	2.23242	2.57318	3.17655	3.85072	4.96713	8.92969	19.6208
0.0839844	0.180017	0.248047	0.305859	0.37657	0.482485	0.549034	0.631308	0.739039	0.820517	0.946234	1.07552	1.23008	1.33577	1.50881	1.72443	1.93731	2.23242	2.57477	3.17655	3.85072	4.96713	8.98464	19.8065
0.0839844	0.180155	0.248047	0.305859	0.377061	0.48335	0.549034	0.631338	0.740019	0.820703	0.946492	1.07552	1.23106	1.33577	1.50881	1.72581	1.93731	2.23242	2.57484	3.17655	3.85072	4.96713	8.98806	19.8577
0.0839844	0.180414	0.248047	0.305859	0.377288	0.483409	0.549034	0.631879	0.740192	0.821739	0.947905	1.07653	1.2319	1.33577	1.50881	1.72616	1.93731	2.23242	2.57796	3.17686	3.85072	4.98568	8.98806	19.9982
0.0839844	0.180768	0.248047	0.305859	0.377528	0.483955	0.549034	0.63192	0.741163	0.821972	0.948268	1.07659	1.2319	1.33577	1.50881	1.7302	1.93731	2.23242	2.57861	3.18189	3.85072	4.98568	8.99149	20.13
0.0839844	0.180782	0.248047	0.305859	0.377619	0.484427	0.549034	0.632334	0.742107	0.821972	0.949015	1.07709	1.2319	1.33577	1.50881	1.73349	1.93886	2.23242	2.58277	3.18348	3.85072	4.99185	9.01882	20.1545
0.0839844	0.180785	0.248047	0.305859	0.377927	0.484621	0.549034	0.632398	0.74223	0.821972	0.950057	1.07804	1.23205	1.33577	1.50881	1.73389	1.939	2.23242	2.58306	3.19662	3.85551	5.01644	9.02904	20.2139
0.0839844	0.180791	0.248047	0.305859	0.378204	0.484934	0.549034	0.632398	0.74223	0.821972	0.950175	1.07901	1.23242	1.33577	1.50881	1.73461	1.93985	2.23242	2.58322	3.19853	3.86261	5.01644	9.02904	20.3232
0.0839844	0.180862	0.248047	0.305859	0.378327	0.48539	0.549034	0.632398	0.74223	0.821972	0.950175	1.07948	1.23349	1.33577	1.50881	1.73552	1.94108	2.23245	2.58621	3.20058	3.86585	5.05126	9.05286	20.3247
0.0839844	0.180973	0.248047	0.305859	0.378973	0.486042	0.549034	0.632398	0.74223	0.821972	0.951355	1.07959	1.23409	1.33577	1.50881	1.73577	1.94142	2.2327	2.58682	3.21683	3.86848	5.05918	9.09693	20.4259
0.0839844	0.181096	0.248047	0.305859	0.379302	0.486872	0.549034	0.632398	0.74223	0.823249	0.953177	1.08032	1.23498	1.33577	1.50881	1.73587	1.94167	2.23341	2.58721	3.22446	3.87408	5.1076	9.09693	20.4545
0.0839844	0.181162	0.248047	0.306448	0.379401	0.488092	0.549445	0.632398	0.743814	0.823265	0.954582	1.08077	1.23507	1.33577	1.50881	1.73597	1.94169	2.23375	2.58726	3.22461	3.87462	5.1076	9.10031	20.6118
0.0839844	0.181263	0.248047	0.306499	0.379423	0.488582	0.550343	0.632398	0.743918	0.824636	0.955501	1.08103	1.23711	1.33577	1.50881	1.73617	1.94439	2.23586	2.58969	3.22461	3.87462	5.11362	9.10031	20.6833
0.0839844	0.18127	0.248047	0.306861	0.379711	0.489005	0.550375	0.632398	0.744033	0.825115	0.956363	1.08175	1.24023	1.33577	1.509	1.73633	1.94781	2.23971	2.58969	3.22461	3.87462	5.14624	9.14752	21.027
0.0839844	0.181285	0.248047	0.306987	0.379724	0.489428	0.550555	0.632398	0.744141	0.82715	0.956929	1.08206	1.24023	1.33577	1.50909	1.73633	1.94788	2.24318	2.58969	3.22461	3.87462	5.16152	9.17773	21.1204
0.0839844	0.181352	0.248047	0.307794	0.379793	0.489709	0.550611	0.632398	0.744141	0.82715	0.957064	1.08278	1.24023	1.33577	1.50952	1.73633	1.948	2.24566	2.58969	3.22461	3.87462	5.17937	9.17773	21.1204
0.0839844	0.181417	0.248047	0.308697	0.379862	0.489709	0.553508	0.632398	0.744141	0.82715	0.957569	1.08318	1.24023	1.33577	1.50995	1.73633	1.94867	2.24616	2.58969	3.22461	3.87779	5.17937	9.17773	21.345
0.0839844	0.181878	0.248047	0.30873	0.379932	0.489709	0.554055	0.632398	0.744141	0.82715	0.957569	1.08387	1.24023	1.33577	1.51221	1.73633	1.95215	2.24616	2.58969	3.22461	3.88255	5.17937	9.19113	21.4442
0.0839844	0.18208	0.248047	0.308884	0.380208	0.489709	0.554231	0.632398	0.744141	0.82715	0.957569	1.08412	1.24023	1.33577	1.51251	1.73633	1.953	2.24616	2.58969	3.22461	3.88818	5.17937	9.20785	21.6711
0.0839844	0.18218	0.248047	0.308914	0.380404	0.489709	0.554311	0.632398	0.744141	0.827728	0.957569	1.08419	1.24023	1.33577	1.51379	1.73633	1.95329	2.24616	2.58969	3.22461	3.8937	5.17937	9.26115	21.6938
0.0839844	0.182375	0.248047	0.30925	0.380522	0.489709	0.55465	0.632398	0.744141	0.827892	0.957787	1.08456	1.24023	1.33577	1.51405	1.73633	1.95432	2.24616	2.58969	3.22461	3.92197	5.20898	9.2678	21.9013
0.0839844	0.182488	0.248047	0.310481	0.380589	0.489709	0.55465	0.632398	0.744141	0.828555	0.959215	1.08513	1.24023	1.33577	1.51405	1.73633	1.95463	2.24616	2.58969	3.22461	3.92197	5.20898	9.29762	21.998
0.0839844	0.182911	0.248047	0.310697	0.380589	0.489709	0.55465	0.632398	0.744141	0.829606	0.959733	1.0852	1.24023	1.33577	1.5167	1.73633	1.95533	2.24616	2.58969	3.23414	3.92197	5.20898	9.31085	22.0762
0.0839844	0.18359	0.248047	0.310935	0.380905	0.489709	0.55465	0.632398	0.744141	0.829754	0.960385	1.08609	1.24023	1.33577	1.51899	1.73633	1.95582	2.24616	2.58969	3.23414	3.92197	5.21489	9.32076	22.0817
0.0839844	0.184416	0.248047	0.311262	0.380983	0.489709	0.55465	0.632398	0.744141	0.830003	0.961369	1.08831	1.24023	1.33577	1.52155	1.73633	1.95593	2.24616	2.58969	3.23414	3.92197	5.21546	9.35041	22.143
0.0839844	0.184417	0.248047	0.311626	0.381176	0.489709	0.55465	0.632398	0.744141	0.83019	0.961448	1.08922	1.24023	1.33577	1.52243	1.73633	1.95661	2.24616	2.58969	3.23414	3.92197	5.23255	9.40534	22.3256
0.0843054	0.184528	0.248047	0.311626	0.381591	0.489709	0.55465	0.632398	0.744141	0.830891	0.961824	1.09012	1.24023	1.33577	1.52588	1.73832	1.95814	2.24616	2.58969	3.23414	3.92197	5.25251	9.41272	22.3297
0.0847204	0.184548	0.248047	0.311762	0.382116	0.490057	0.55465	0.632398	0.744141	0.831975	0.961824	1.0917	1.24023	1.33577	1.52785	1.73842	1.95815	2.24616	2.58969	3.23414	3.92197	5.25602	9.41272	22.6593
0.0847998	0.184787	0.248047	0.312418	0.382832	0.490157	0.55465	0.632398	0.744141	0.831975	0.961824	1.0918	1.24023	1.33577	1.53258	1.73878	1.95846	2.24672	2.58969	3.23414	3.92197	5.25602	9.42578	22.7677
0.0848763	0.184885	0.248047	0.312962	0.382966	0.490238	0.55465	0.632398	0.744141	0.831975	0.961824	1.0918	1.24023	1.33577	1.53264	1.73905	1.95864	2.24783	2.58969	3.23414	3.92197	5.25602	9.42904	22.8014
0.0850003	0.1853	0.248047	0.313446	0.383045	0.490607	0.55465	0.632398	0.744141	0.831975	0.961824	1.0918	1.24023	1.33577	1.53311	1.74021	1.95989	2.24819	2.59546	3.23414	3.92197	5.26187	9.44534	22.8769
0.0850158	0.18538	0.248047	0.313772	0.383903	0.491039	0.55465	0.632398	0.744141	0.831975	0.961824	1.0918	1.24023	1.33577	1.53494	1.74029	1.96098	2.25095	2.59937	3.23414	3.92197	5.26187	9.44534	22.9628
0.0852335	0.185878	0.248047	0.313792	0.384571	0.492	0.55465	0.632398	0.744141	0.831975	0.961824	1.09215	1.24023	1.33577	1.53533	1.74075	1.96098	2.25336	2.61339	3.24287	3.92197	5.30843	9.49407	23.0804
0.0854266	0.185945	0.248047	0.31415	0.385032	0.492298	0.55465	0.632398	0.744141	0.831975	0.96254	1.09234	1.24023	1.33577	1.53595	1.74075	1.96098	2.25371	2.61373	3.24537	3.92887	5.31534	9.54578	23.0897
0.0854838	0.186115	0.248047	0.314588	0.386123	0.49243	0.55465	0.632398	0.744141	0.831975	0.964288	1.09263	1.24023	1.33577	1.53644	1.74075	1.96098	2.25504	2.61523	3.24782	3.93638	5.32579	9.62306	23.381
0.085513	0.186162	0.248047	0.314661	0.386739	0.493033	0.55465	0.632398	0.744141	0.831975	0.964373	1.09357	1.24023	1.33577	1.53667	1.74075	1.96201	2.25518	2.61636	3.24854	3.93921	5.41743	9.6324	23.4007
0.0855784	0.186699	0.248047	0.31487	0.386826	0.493038	0.55465	0.632398	0.744141	0.831975	0.964609	1.09397	1.24023	1.33577	1.5377	1.74082	1.96467	2.25607	2.61991	3.25684	3.96849	5.44009	9.67383	23.4755
0.0856567	0.187258	0.248047	0.315223	0.386858	0.493316	0.55465	0.632398	0.744141	0.833761	0.965159	1.09445	1.24023	1.33577	1.53877	1.7412	1.96499	2.25918	2.62199	3.26255	3.96875	5.44574	9.70241	23.5762
0.0857497	0.187311	0.248047	0.315639	0.387344	0.493793	0.55465	0.632398	0.744141	0.834011	0.965536	1.09487	1.24023	1.33615	1.53934	1.74136	1.96529	2.26322	2.62293	3.26255	3.96875	5.45703	9.78764	23.8873
0.0859776	0.187323	0.248047	0.315739	0.38743	0.494614	0.55465	0.632398	0.744141	0.834298	0.965916	1.09502	1.24023	1.33737	1.54066	1.7416	1.96556	2.26515	2.62913	3.26255	3.97649	5.45703	9.81275	24.035
0.0859915	0.187378	0.248047	0.31636	0.388802	0.495783	0.55465	0.632398	0.744141	0.8352	0.966328	1.09509	1.24023	1.33787	1.54326	1.74255	1.96692	2.26781	2.6342	3.26589	3.97649	5.45703	9.92188	24.0644
0.086027	0.18738	0.248047	0.316628	0.389335	0.496018	0.55465	0.632398	0.744141	0.835312	0.967212	1.09764	1.24023	1.33835	1.54397	1.74377	1.96771	2.2691	2.6354	3.27216	3.99964	5.47953	9.92188	24.0848
0.0861931	0.187505	0.248047	0.31663	0.389387	0.496094	0.55465	0.632459	0.744141	0.836067	0.967212	1.09807	1.24023	1.34057	1.54487	1.74501	1.96976	2.27228	2.63677	3.27255	3.99964	5.49075	9.93427	24.0925
0.0864926	0.187561	0.248047	0.316751	0.389399	0.496094	0.55465	0.635094	0.744141	0.836146	0.967212	1.09807	1.24023	1.34062	1.54502	1.74759	1.96999	2.27363	2.63677	3.27333	3.99964	5.50753	9.9621	24.3402
0.0865219	0.187593	0.248047	0.316813	0.389419	0.496094	0.55465	0.635308	0.744141	0.837002	0.967697	1.09807	1.24023	1.34152	1.54561	1.7476	1.97037	2.27952	2.63677	3.28359	3.99964	5.5465	10.0286	24.3958
0.0866072	0.187664	0.248047	0.316979	0.389894	0.496094	0.55465	0.635995	0.744141	0.837924	0.968654	1.09807	1.24023	1.34152	1.54601	1.74766	1.97204	2.28007	2.63745	3.28385	3.99964	5.57416	10.0513	24.5566
0.0866608	0.187795	0.248047	0.317064	0.390343	0.496094	0.55465	0.636039	0.744141	0.838078	0.968654	1.09856	1.24023	1.3417	1.54638	1.74824	1.9725	2.28419	2.63941	3.29934	4.00732	5.59619	10.0727	24.7165
0.0867435	0.187795	0.248047	0.317454	0.390805	0.496094	0.55465	0.636192	0.744141	0.839007	0.968654	1.09865	1.24023	1.3421	1.547	1.74878	1.97276	2.28614	2.64027	3.30936	4.00732	5.62361	10.1699	24.8357
0.0867473	0.187795	0.248047	0.317557	0.391112	0.496094	0.55465	0.636434	0.744141	0.839844	0.968654	1.09923	1.24023	1.34306	1.5486	1.75026	1.97324	2.28688	2.64238	3.30936	4.00732	5.6442	10.179	24.8567
0.0867542	0.187795	0.248047	0.317716	0.391275	0.496094	0.55465	0.637696	0.744141	0.839844	0.968654	1.09953	1.24023	1.34592	1.5488	1.75054	1.97501	2.28688	2.64264	3.32573	4.03791	5.65634	10.2453	24.9049
0.0868098	0.187795	0.248047	0.318084	0.391314	0.496094	0.55465	0.637868	0.744141	0.839844	0.968654	1.09963	1.24023	1.34624	1.5494	1.75095	1.97844	2.28688	2.64387	3.3279	4.03791	5.66178	10.3587	24.9753
0.08692	0.187795	0.248047	0.318687	0.39165	0.496094	0.55465	0.637986	0.744141	0.839844	0.968654	1.1001	1.24023	1.3464	1.54956	1.75171	1.9808	2.28688	2.64686	3.3279	4.03791	5.6676	10.3617	25.0466
0.086964	0.187795	0.248047	0.318722	0.391849	0.496094	0.55465	0.63842	0.744141	0.840025	0.968654	1.10127	1.24023	1.34647	1.54961	1.75225	1.9821	2.28688	2.64735	3.33713	4.04047	5.71047	10.4445	25.0638
0.0870957	0.187795	0.248047	0.318887	0.392142	0.496094	0.55465	0.638553	0.744141	0.840727	0.968733	1.10256	1.24023	1.34816	1.55088	1.75304	1.98238	2.28688	2.64965	3.33713	4.06402	5.71047	10.4563	25.1128
0.0871666	0.187795	0.248047	0.319311	0.392197	0.496094	0.55465	0.638582	0.744141	0.840727	0.968822	1.10272	1.24023	1.34899	1.5526	1.75396	1.98298	2.28688	2.65308	3.33713	4.06827	5.72661	10.5237	25.185
0.0872067	0.187795	0.248047	0.319852	0.392197	0.496094	0.55465	0.638645	0.744141	0.840727	0.969135	1.10279	1.24023	1.3499	1.55401	1.75396	1.98383	2.28688	2.65422	3.3383	4.06827	5.7534	10.666	25.2789
0.0872485	0.187795	0.248047	0.320203	0.392197	0.496094	0.55465	0.639386	0.744141	0.840727	0.969337	1.10279	1.24023	1.35099	1.5541	1.75396	1.98395	2.28688	2.65501	3.34033	4.09089	5.76942	10.7693	25.3603
0.0872509	0.187795	0.248047	0.320532	0.392197	0.496094	0.55465	0.639606	0.744141	0.841007	0.969754	1.10279	1.24023	1.35111	1.55428	1.75396	1.98438	2.28688	2.65688	3.35079	4.09089	5.79071	10.815	25.3651
0.087264	0.187795	0.248047	0.320693	0.392197	0.496094	0.55465	0.639606	0.744141	0.842111	0.969873	1.10436	1.24023	1.35151	1.55446	1.75396	1.98438	2.28688	2.6578	3.35861	4.09089	5.79071	10.9772	25.3979
0.0873514	0.187795	0.248047	0.322009	0.392197	0.496094	0.55465	0.640344	0.744141	0.84253	0.970171	1.10464	1.24023	1.35271	1.55466	1.75396	1.98438	2.28688	2.65906	3.36176	4.09089	5.83833	10.9843	25.4221
0.087693	0.187795	0.248047	0.322164	0.392197	0.496094	0.55465	0.641538	0.744141	0.84254	0.970291	1.10508	1.24023	1.35426	1.55491	1.75396	1.98438	2.28688	2.66126	3.36332	4.10591	5.91684	11.0095	25.6102
0.0878158	0.187795	0.248047	0.32232	0.392197	0.496094	0.55465	0.642382	0.744141	0.84345	0.970983	1.10513	1.24023	1.35601	1.55503	1.75396	1.98438	2.28908	2.66212	3.36334	4.10826	5.95829	11.1069	25.6941
0.087835	0.187795	0.248047	0.322404	0.392197	0.496094	0.55465	0.642823	0.744141	0.843601	0.971997	1.10514	1.24023	1.35618	1.55589	1.75396	1.98438	2.29009	2.6629	3.37309	4.12145	5.96345	11.1621	25.8969
0.0879557	0.187795	0.248047	0.322404	0.392197	0.496094	0.55465	0.642994	0.744141	0.844026	0.972537	1.10529	1.24023	1.35644	1.55625	1.75396	1.98438	2.29111	2.6629	3.3738	4.14171	5.97376	11.1621	26.1027
0.0880591	0.187795	0.248047	0.322404	0.392197	0.496094	0.55465	0.64555	0.744141	0.844033	0.974628	1.10654	1.24023	1.35664	1.55625	1.75396	1.98438	2.29156	2.66306	3.3738	4.15802	5.99432	11.2061	26.1804
0.0881517	0.187795	0.248047	0.322404	0.392197	0.496094	0.55465	0.645649	0.744141	0.845342	0.975114	1.10697	1.24023	1.35683	1.55643	1.75396	1.98438	2.29199	2.67155	3.3738	4.16828	5.99432	11.2308	26.1804
0.0882093	0.187795	0.248047	0.322404	0.392197	0.496094	0.55465	0.646054	0.744141	0.845514	0.97607	1.1093	1.24023	1.35883	1.55719	1.75396	1.98438	2.29413	2.67155	3.3738	4.20755	6.12631	11.3559	26.7569
0.0883496	0.187795	0.248047	0.322404	0.392197	0.496094	0.55465	0.646263	0.744141	0.845614	0.976118	1.1093	1.24023	1.35915	1.55729	1.75396	1.98438	2.2955	2.67155	3.3738	4.2168	6.13634	11.5628	26.7569
0.0883828	0.187795	0.248047	0.322404	0.392197	0.496094	0.55465	0.646725	0.744141	0.845717	0.97614	1.1093	1.24023	1.36022	1.5576	1.75396	1.98438	2.29968	2.67155	3.3738	4.2168	6.13634	11.6476	27.0417
0.0884024	0.187795	0.248047	0.322404	0.392197	0.496094	0.55465	0.647965	0.744141	0.845951	0.97618	1.1093	1.24023	1.36036	1.559	1.75396	1.98438	2.29988	2.67155	3.3738	4.2168	6.14135	11.6688	27.2287
0.0888414	0.187795	0.248047	0.322404	0.392197	0.496094	0.55465	0.648136	0.744141	0.846745	0.976994	1.1093	1.24023	1.3607	1.5591	1.75396	1.98467	2.30345	2.67155	3.3738	4.2168	6.20117	11.6688	27.7292
0.0890475	0.187795	0.248047	0.322404	0.392197	0.496094	0.55465	0.648711	0.744141	0.847496	0.977296	1.1093	1.24023	1.36129	1.5603	1.75396	1.98494	2.3039	2.67155	3.37519	4.22409	6.20117	11.6767	27.8034
0.0891214	0.187795	0.248047	0.322404	0.392197	0.496094	0.55465	0.648805	0.744141	0.848832	0.977378	1.1093	1.24023	1.36227	1.56149	1.75396	1.98522	2.3059	2.67155	3.37566	4.22409	6.20117	11.7633	29.6839
0.0891452	0.187795	0.248047	0.322404	0.392197	0.496094	0.55465	0.648953	0.744141	0.849809	0.977536	1.1093	1.24023	1.36335	1.5622	1.75396	1.98627	2.30826	2.67155	3.40463	4.22409	6.21604	11.8467	29.7294
0.0892301	0.187795	0.248047	0.322404	0.392197	0.496094	0.55465	0.649066	0.744141	0.850439	0.977794	1.1093	1.24023	1.36419	1.5622	1.75396	1.98792	2.30831	2.67155	3.40641	4.22409	6.22098	11.8758	30.1609
0.0894058	0.187795	0.248047	0.322404	0.392197	0.496094	0.55465	0.649215	0.744141	0.852983	0.977837	1.1093	1.24023	1.36426	1.5622	1.75396	1.98825	2.31005	2.67155	3.41698	4.22409	6.22098	12.0322	30.2922
0.0896343	0.187795	0.248047	0.322404	0.392197	0.496094	0.55465	0.649823	0.744141	0.85411	0.978849	1.1093	1.24023	1.36426	1.5656	1.75396	1.98826	2.31188	2.67155	3.41961	4.24026	6.26042	12.134	30.3632
0.0898513	0.187795	0.248047	0.322404	0.392197	0.496094	0.55465	0.649944	0.744141	0.85443	0.979418	1.1093	1.24023	1.36426	1.56563	1.75396	1.99244	2.3145	2.67155	3.43903	4.24588	6.27514	12.3152	30.5057
0.0899218	0.187795	0.248047	0.322404	0.392197	0.496094	0.55465	0.649995	0.744141	0.854727	0.979909	1.1093	1.24023	1.36493	1.56737	1.75396	1.99298	2.31695	2.67155	3.44131	4.24588	6.28005	12.3152	30.5138
0.0900249	0.187795	0.248047	0.322404	0.392197	0.496094	0.55465	0.650148	0.744141	0.855859	0.980672	1.1093	1.24023	1.36533	1.56841	1.75396	1.99339	2.32028	2.67155	3.44472	4.24588	6.31424	12.4023	30.7738
0.0900708	0.187795	0.248047	0.322404	0.392197	0.496094	0.55465	0.650315	0.744141	0.856034	0.980815	1.1093	1.24023	1.36584	1.56879	1.75396	1.99581	2.32368	2.67317	3.44555	4.24588	6.3531	12.5233	30.8387
0.0908592	0.187795	0.248047	0.322404	0.392197	0.496094	0.55465	0.651005	0.744141	0.856476	0.982114	1.1093	1.24023	1.36668	1.56879	1.75396	1.99594	2.32414	2.67687	3.44598	4.24588	6.44922	12.5416	31.8168
0.0909275	0.187795	0.248047	0.322424	0.392197	0.496094	0.55465	0.651488	0.744301	0.857335	0.982185	1.1093	1.24023	1.36712	1.56879	1.75396	1.99659	2.32442	2.68167	3.44598	4.26756	6.45399	12.7569	32.3689
0.0909575	0.187795	0.248047	0.322736	0.392197	0.496094	0.55465	0.65174	0.744729	0.858018	0.982352	1.1093	1.24023	1.3672	1.56879	1.75396	1.99934	2.32592	2.68172	3.45377	4.26756	6.45399	12.7858	33.035
0.0912448	0.187795	0.248047	0.322922	0.392197	0.496094	0.55465	0.652819	0.745267	0.858467	0.982602	1.1093	1.24023	1.36781	1.56879	1.75396	1.99942	2.32792	2.68304	3.45489	4.26756	6.51094	12.8459	33.2688
0.0912491	0.187795	0.248047	0.323098	0.392197	0.496094	0.55465	0.652819	0.745326	0.860785	0.983284	1.1093	1.24023	1.36849	1.56879	1.75396	1.99982	2.33019	2.68304	3.45489	4.26756	6.54863	12.865	33.421
0.0913953	0.187795	0.248047	0.32334	0.392197	0.496094	0.55465	0.652819	0.746212	0.861682	0.983874	1.1093	1.24023	1.36988	1.56879	1.75396	1.99982	2.331	2.68304	3.45489	4.26756	6.56739	12.9307	33.5047
0.0915108	0.187795	0.248047	0.323776	0.392197	0.496094	0.55465	0.652819	0.746328	0.862629	0.984168	1.1093	1.24023	1.36988	1.56879	1.75396	1.99982	2.33124	2.68304	3.45489	4.26756	6.59077	13.1278	33.6147
0.0915949	0.187795	0.248047	0.323805	0.392197	0.496094	0.55465	0.652819	0.746508	0.863668	0.984559	1.1093	1.24079	1.37091	1.56879	1.75396	1.99982	2.33253	2.68304	3.45489	4.26756	6.67887	13.1675	33.6833
0.0916386	0.187898	0.248047	0.32408	0.39245	0.496094	0.55465	0.652819	0.747232	0.864654	0.985773	1.1093	1.24082	1.37164	1.56879	1.75396	1.99982	2.33339	2.68304	3.45489	4.26756	6.7476	13.2025	33.7672
0.0917713	0.187906	0.248047	0.324322	0.392555	0.496094	0.55465	0.652819	0.747732	0.864672	0.98826	1.1093	1.24283	1.37229	1.56898	1.75396	1.99982	2.33458	2.68304	3.45489	4.26756	6.77036	13.2792	34.3928
0.0918063	0.187912	0.248047	0.32478	0.393491	0.496094	0.55465	0.652819	0.748462	0.864672	0.988327	1.1093	1.24334	1.37239	1.56982	1.75396	1.99982	2.33492	2.68304	3.45489	4.27652	6.7749	13.3116	35.3882
0.0920522	0.188031	0.248047	0.324979	0.393514	0.496094	0.55465	0.652819	0.748968	0.864672	0.988547	1.1093	1.2445	1.37348	1.57124	1.75396	1.99982	2.33563	2.68429	3.45489	4.27774	6.84268	13.4037	35.7506
0.0922045	0.188077	0.248047	0.325008	0.393662	0.496094	0.55465	0.652819	0.749826	0.864672	0.989423	1.1093	1.24568	1.37394	1.57386	1.75396	1.99982	2.33663	2.68446	3.45489	4.28176	6.87855	13.4244	36.0078
0.0922629	0.188402	0.248047	0.325026	0.394228	0.496094	0.55465	0.652819	0.750348	0.864672	0.989806	1.1093	1.24642	1.37458	1.57408	1.75396	1.99982	2.33814	2.6859	3.45489	4.28195	6.87855	13.5407	36.4055
0.0923296	0.188987	0.248047	0.325369	0.394344	0.496094	0.55465	0.652819	0.750643	0.864672	0.990007	1.1093	1.24642	1.37598	1.57489	1.75396	1.99982	2.33864	2.69249	3.45494	4.28195	6.89195	13.5793	36.5371
0.0923818	0.189195	0.248047	0.32566	0.394574	0.496094	0.55465	0.652913	0.750654	0.864672	0.990519	1.1093	1.24642	1.37716	1.57512	1.75396	1.99982	2.34007	2.69574	3.46312	4.28195	6.94974	13.6988	36.6917
0.0924284	0.189353	0.248047	0.325678	0.395223	0.496094	0.55465	0.653135	0.751179	0.865488	0.991904	1.1093	1.24642	1.37745	1.57549	1.75396	1.99982	2.34007	2.70289	3.47266	4.31276	6.94974	13.8662	38.3126
0.0924382	0.189508	0.248047	0.325923	0.395406	0.496094	0.55465	0.65335	0.751179	0.865693	0.992098	1.1093	1.24642	1.37796	1.57655	1.75396	1.99982	2.34007	2.70313	3.47266	4.32078	6.94974	13.9987	38.4305
0.0925282	0.189681	0.248047	0.326353	0.396412	0.496094	0.55465	0.653378	0.751179	0.866721	0.992188	1.1093	1.24642	1.37964	1.57663	1.75396	1.99982	2.34007	2.70318	3.47266	4.33195	7.01583	14.0317	38.5815
0.0926209	0.189818	0.248047	0.326787	0.396792	0.496094	0.55465	0.653727	0.751179	0.867071	0.992188	1.1093	1.24807	1.38088	1.57716	1.75396	1.99982	2.34007	2.70491	3.47266	4.33195	7.01583	14.1734	38.6348
0.0926827	0.190421	0.248047	0.326839	0.396836	0.496094	0.55465	0.654002	0.751179	0.86745	0.992188	1.1093	1.24811	1.38149	1.57726	1.75396	1.99982	2.34007	2.71511	3.47266	4.33369	7.02021	14.2837	38.6897
0.0928322	0.191045	0.248047	0.327614	0.397602	0.496094	0.55465	0.654006	0.751366	0.868164	0.992188	1.1093	1.24831	1.38169	1.57728	1.75396	1.99982	2.34007	2.71872	3.47266	4.33905	7.02459	14.3375	38.7724
0.0930744	0.191199	0.248047	0.32834	0.398054	0.496094	0.55465	0.654038	0.75301	0.868164	0.992188	1.11108	1.24852	1.38216	1.57809	1.75396	1.99982	2.34007	2.71918	3.47266	4.33905	7.05082	14.489	38.8769
0.093241	0.191247	0.248047	0.328415	0.398811	0.496094	0.55465	0.654134	0.753021	0.868164	0.992188	1.11121	1.24852	1.3833	1.57814	1.75396	1.99982	2.34007	2.72032	3.47773	4.3566	7.05518	14.5229	38.8888
0.0932509	0.191352	0.248047	0.328562	0.399069	0.496094	0.55465	0.654665	0.754405	0.868164	0.992188	1.11169	1.24852	1.38455	1.57856	1.75396	1.99982	2.34007	2.72601	3.47931	4.3884	7.09431	14.7687	38.9315
0.0933007	0.191651	0.248047	0.328692	0.399943	0.496094	0.55465	0.655042	0.754405	0.868164	0.992188	1.11198	1.24857	1.38484	1.57878	1.75396	1.99982	2.34007	2.72852	3.4815	4.3954	7.10298	14.9014	39.0664
0.0933428	0.191752	0.248047	0.32874	0.400061	0.496094	0.55465	0.655813	0.754405	0.868164	0.992188	1.11362	1.24973	1.38576	1.57964	1.75396	2.00014	2.34007	2.72852	3.4815	4.3954	7.14185	14.9241	39.6953
0.0935209	0.191896	0.248047	0.329085	0.400097	0.496094	0.55465	0.655939	0.754405	0.868164	0.992188	1.1142	1.25083	1.38608	1.57978	1.75396	2.0012	2.34007	2.72852	3.48173	4.41635	7.15906	14.992	39.9817
0.0937395	0.192174	0.248047	0.329227	0.400381	0.496094	0.55465	0.655939	0.754405	0.868164	0.992188	1.11466	1.25185	1.38632	1.57981	1.75396	2.00159	2.34007	2.72852	3.48215	4.41941	7.19763	15.0145	40.4735
0.0937539	0.192225	0.248047	0.329323	0.400705	0.496094	0.55465	0.656842	0.754405	0.868164	0.992188	1.11513	1.25241	1.38662	1.58068	1.75396	2.00202	2.34007	2.72852	3.49006	4.43689	7.2445	15.0881	40.6918
0.0938924	0.192573	0.248047	0.329691	0.401414	0.496094	0.55465	0.656907	0.754405	0.868164	0.992188	1.11621	1.25555	1.38671	1.58095	1.75396	2.00251	2.34007	2.72852	3.50791	4.4372	7.29528	15.1125	40.8977
0.0941067	0.192934	0.248047	0.329872	0.401549	0.496094	0.55465	0.657885	0.754405	0.868164	0.992188	1.11844	1.256	1.38671	1.58241	1.75396	2.00334	2.34007	2.7311	3.50791	4.45779	7.32474	15.2463	41.5551
0.0941404	0.193249	0.248047	0.329937	0.402102	0.496094	0.55465	0.65808	0.754405	0.868164	0.992188	1.11911	1.25611	1.38755	1.58274	1.75396	2.00366	2.34007	2.73219	3.50791	4.46484	7.32894	15.3409	41.5869
0.0942573	0.193352	0.248047	0.330044	0.402177	0.496094	0.55465	0.658132	0.754405	0.868164	0.992188	1.11988	1.25631	1.38758	1.58352	1.75396	2.00461	2.34007	2.73336	3.50791	4.46772	7.34571	15.3869	41.8376
0.0944229	0.193824	0.248047	0.330267	0.402252	0.496094	0.55465	0.658416	0.754405	0.868164	0.992188	1.12041	1.25738	1.38853	1.58461	1.75396	2.00706	2.34007	2.73977	3.50791	4.46867	7.37496	15.4706	42.1183
0.0944525	0.193908	0.248047	0.330273	0.402323	0.496094	0.55465	0.659	0.754405	0.868187	0.992188	1.12049	1.25806	1.39019	1.58461	1.75396	2.00891	2.34234	2.73977	3.50791	4.47173	7.37496	15.5698	42.2882
0.0944848	0.193951	0.248047	0.330642	0.402919	0.496094	0.55465	0.660132	0.754405	0.868917	0.992188	1.12148	1.25829	1.39103	1.58493	1.75416	2.01013	2.34242	2.73977	3.50791	4.47173	7.39995	15.6112	42.2998
0.0946891	0.194024	0.248047	0.33174	0.403448	0.496094	0.555664	0.662606	0.754405	0.869238	0.992188	1.12148	1.25831	1.39256	1.58499	1.75804	2.01035	2.34646	2.73977	3.52261	4.47173	7.39995	15.6112	42.3238
0.0951896	0.194092	0.248047	0.33326	0.403987	0.496094	0.555724	0.662875	0.754724	0.869381	0.992188	1.12148	1.25852	1.39401	1.58516	1.75876	2.01099	2.3471	2.73977	3.52641	4.47173	7.39995	15.6879	42.7512
0.0952023	0.194401	0.248047	0.333388	0.404379	0.496094	0.556333	0.662896	0.755131	0.869474	0.992188	1.12148	1.25907	1.39516	1.5852	1.75902	2.01534	2.34714	2.73977	3.55149	4.47173	7.44141	15.9928	42.8669
0.0954034	0.194483	0.248047	0.333607	0.404507	0.496094	0.556395	0.663022	0.755845	0.869859	0.992188	1.1216	1.25931	1.39679	1.58524	1.76098	2.01581	2.34714	2.73977	3.55149	4.47173	7.44554	16.0944	43.1488
0.0954227	0.194829	0.248047	0.333752	0.404604	0.496094	0.556457	0.66404	0.755859	0.870354	0.992188	1.12223	1.25964	1.39706	1.58552	1.76207	2.01702	2.34806	2.73977	3.55149	4.47173	7.44554	16.1992	44.6209
0.0955542	0.195079	0.248047	0.334521	0.404861	0.496094	0.556926	0.66405	0.755859	0.871088	0.992188	1.12308	1.26079	1.39707	1.58572	1.7627	2.01823	2.35181	2.75019	3.55149	4.47173	7.45792	16.2314	44.7042
0.0955918	0.195121	0.248047	0.334815	0.404932	0.496094	0.558072	0.664163	0.756352	0.871088	0.992188	1.12309	1.26188	1.39748	1.5859	1.76286	2.01896	2.35227	2.76563	3.55149	4.47173	7.46205	16.2371	44.7173
0.0957541	0.195236	0.248047	0.334981	0.40498	0.496094	0.558188	0.664392	0.757469	0.871407	0.992188	1.1231	1.26207	1.39769	1.58702	1.76359	2.01896	2.35306	2.7704	3.55149	4.49302	7.49906	16.2598	44.9759
0.0958403	0.195239	0.248047	0.33501	0.406016	0.496094	0.558384	0.664473	0.758287	0.871932	0.992188	1.12528	1.26254	1.39778	1.58827	1.76457	2.01969	2.35313	2.77325	3.55202	4.49853	7.50726	16.3071	45.6062
0.0960331	0.195518	0.248047	0.335511	0.406482	0.496094	0.558601	0.66448	0.75838	0.872402	0.992188	1.12532	1.26285	1.39974	1.58827	1.76478	2.01994	2.35318	2.77325	3.55491	4.50263	7.50726	16.3071	45.6433
0.0960356	0.195572	0.248047	0.335686	0.40733	0.496094	0.558763	0.665666	0.758415	0.87242	0.992188	1.12555	1.26373	1.40066	1.58827	1.76512	2.0222	2.35318	2.77325	3.55604	4.52643	7.54405	16.3127	45.7544
0.096089	0.195786	0.248047	0.335937	0.407784	0.496094	0.558828	0.66577	0.758936	0.87408	0.992188	1.12611	1.2648	1.4018	1.58827	1.76567	2.02371	2.35318	2.77325	3.57738	4.52643	7.54405	16.3203	46.5404
0.0964281	0.195988	0.248047	0.335937	0.407812	0.496094	0.560117	0.665894	0.759243	0.874226	0.992188	1.12611	1.2648	1.40317	1.58827	1.76567	2.02371	2.35318	2.77325	3.57738	4.52643	7.56035	16.388	46.8047
0.0965294	0.196147	0.248047	0.335937	0.407812	0.496094	0.560843	0.666901	0.759282	0.874693	0.992188	1.12618	1.2648	1.40317	1.58827	1.76567	2.02622	2.35318	2.77325	3.58542	4.54047	7.59283	16.4011	47.1681
0.0966048	0.196277	0.248047	0.335937	0.407812	0.496094	0.561057	0.667051	0.759956	0.875038	0.992188	1.12674	1.2648	1.40317	1.58827	1.76723	2.02764	2.35318	2.77325	3.59354	4.55528	7.64129	16.4311	47.1844
0.0966059	0.196281	0.248047	0.335938	0.407812	0.496094	0.561985	0.667276	0.760016	0.875292	0.992188	1.12703	1.2648	1.40317	1.58827	1.77245	2.02993	2.35318	2.77325	3.5957	4.57062	7.65738	16.5319	47.4574
0.0970039	0.196288	0.248047	0.335938	0.407812	0.496094	0.562318	0.667764	0.760511	0.875687	0.992188	1.1285	1.2648	1.40317	1.58827	1.77324	2.03135	2.35318	2.77325	3.61162	4.57376	7.65738	16.5802	47.5403
0.0973077	0.196322	0.248047	0.335947	0.407812	0.496094	0.563265	0.667887	0.760511	0.875738	0.992188	1.12858	1.2648	1.40317	1.58827	1.77357	2.03198	2.35318	2.77325	3.61162	4.57376	7.65738	16.5821	47.636
0.0974569	0.19637	0.248047	0.336161	0.407812	0.496094	0.56333	0.667887	0.760511	0.876379	0.992188	1.12876	1.2648	1.40317	1.58827	1.77373	2.03243	2.35318	2.77325	3.61162	4.57376	7.68945	16.6764	47.9045
0.0975036	0.196406	0.248047	0.336358	0.407812	0.496094	0.563384	0.667887	0.7612	0.876823	0.992188	1.12929	1.2648	1.40317	1.58827	1.77575	2.03303	2.35318	2.77325	3.61302	4.57376	7.68945	16.6856	48.2271
0.0976279	0.196622	0.248047	0.336636	0.407813	0.496094	0.563384	0.667887	0.761415	0.876823	0.992188	1.1297	1.2648	1.40317	1.58827	1.77575	2.03341	2.35331	2.77325	3.62342	4.57376	7.68945	16.6856	48.9885
0.0978378	0.196718	0.248047	0.337178	0.407813	0.496094	0.563384	0.667887	0.761612	0.876823	0.992188	1.12989	1.2648	1.40317	1.58827	1.77763	2.03672	2.35418	2.77325	3.63494	4.61266	7.69345	16.7078	49.7506
0.0979805	0.197005	0.248047	0.337602	0.407813	0.496094	0.563384	0.667887	0.7619	0.876978	0.992188	1.1302	1.2648	1.40317	1.58827	1.77777	2.03775	2.35419	2.77325	3.63855	4.61394	7.69345	16.7519	51.2714
0.098064	0.197038	0.248047	0.337678	0.407813	0.496094	0.563384	0.667887	0.762147	0.876978	0.992188	1.13049	1.2648	1.40317	1.58827	1.77854	2.03896	2.35645	2.77325	3.65574	4.61394	7.70544	16.7684	51.3912
0.0982586	0.197209	0.248047	0.337693	0.407813	0.496094	0.563384	0.667887	0.763792	0.876978	0.992188	1.13065	1.2648	1.40317	1.58827	1.77946	2.03903	2.35852	2.77325	3.66237	4.6339	7.74923	16.7684	51.6033
0.0984224	0.197281	0.248047	0.337786	0.407813	0.496094	0.563565	0.667887	0.763887	0.876978	0.992188	1.13073	1.2648	1.40317	1.58827	1.77948	2.03904	2.36077	2.77325	3.6665	4.6339	7.7651	16.7684	52.3608
0.0985896	0.197907	0.248047	0.337834	0.407813	0.496094	0.563603	0.667887	0.764195	0.876978	0.992188	1.13107	1.2648	1.40317	1.58827	1.7796	2.03968	2.36096	2.77325	3.66791	4.6339	7.76906	16.8124	53.1475
0.0986673	0.198331	0.248047	0.337966	0.407813	0.496094	0.563656	0.667887	0.764617	0.876978	0.992188	1.13129	1.2648	1.40317	1.58827	1.78009	2.03979	2.36115	2.77325	3.67936	4.63582	7.78883	16.8124	54.4009
0.0986697	0.198867	0.248047	0.338152	0.407813	0.496094	0.563679	0.667887	0.764775	0.876978	0.992188	1.13136	1.2648	1.40407	1.58827	1.78053	2.04138	2.36118	2.77325	3.68291	4.66038	7.84393	16.8179	55.0893
0.0987417	0.199148	0.248047	0.33833	0.407813	0.496094	0.564698	0.667887	0.766361	0.876978	0.992188	1.13537	1.2648	1.40475	1.58827	1.78159	2.04167	2.36128	2.77325	3.68748	4.71289	7.88305	16.8708	55.8155
0.0988517	0.199235	0.248047	0.338854	0.40829	0.496094	0.566022	0.667887	0.766696	0.876978	0.992188	1.13693	1.2648	1.40556	1.58827	1.78181	2.04243	2.36136	2.77325	3.68748	4.71289	7.88305	16.8909	57.4291
0.0988778	0.199304	0.248047	0.338873	0.408539	0.496094	0.566984	0.667887	0.766882	0.876978	0.992188	1.13713	1.2648	1.4066	1.58827	1.78201	2.04347	2.36147	2.77325	3.68748	4.71289	7.88305	16.9327	57.8806
0.0989419	0.199433	0.248047	0.338931	0.408886	0.496094	0.567114	0.667887	0.767165	0.876978	0.992188	1.13799	1.2648	1.4096	1.58827	1.78345	2.04545	2.36465	2.77325	3.68748	4.71941	7.89475	16.9327	59.8924
0.0991244	0.19949	0.248047	0.339113	0.409729	0.496094	0.567274	0.667887	0.767278	0.876978	0.992188	1.13895	1.2648	1.40983	1.58827	1.78345	2.04545	2.36614	2.77325	3.68748	4.71941	7.95299	17.0161	60.0074
0.0992681	0.199538	0.248047	0.339395	0.410463	0.496094	0.567337	0.667887	0.767816	0.876978	0.992188	1.13926	1.2648	1.41099	1.58827	1.78497	2.04545	2.36758	2.77325	3.7166	4.71941	8.01464	17.0648	60.556
0.0995046	0.199703	0.248047	0.339737	0.410824	0.496094	0.568736	0.667887	0.768443	0.876978	0.992188	1.13928	1.2648	1.4116	1.58827	1.78567	2.04545	2.36914	2.77325	3.7207	4.71941	8.01464	17.1224	61.4135
0.0998172	0.199759	0.248047	0.339854	0.411118	0.496094	0.569395	0.667887	0.768549	0.876978	0.992188	1.13929	1.2648	1.41165	1.58827	1.78662	2.04545	2.37392	2.77325	3.7207	4.73893	8.07582	17.144	61.7432
0.099926	0.199824	0.248047	0.340061	0.411181	0.496094	0.569423	0.667887	0.769295	0.876978	0.992188	1.13938	1.2648	1.4117	1.58827	1.78676	2.04545	2.37939	2.77325	3.7207	4.73893	8.07582	17.144	65.9525
0.100047	0.199826	0.248047	0.340486	0.411784	0.496094	0.570231	0.667887	0.769408	0.876978	0.992188	1.13987	1.2648	1.41184	1.58827	1.78704	2.04545	2.37987	2.77325	3.7207	4.73893	8.07963	17.1798
0.100279	0.199963	0.248047	0.34086	0.411787	0.496094	0.57028	0.667908	0.769449	0.876978	0.992188	1.13987	1.2648	1.41245	1.58827	1.78825	2.04545	2.3799	2.77325	3.7207	4.73893	8.09865	17.2084
0.100451	0.200127	0.248047	0.341167	0.411852	0.496094	0.570682	0.668085	0.77027	0.876978	0.992188	1.13987	1.2648	1.41395	1.58827	1.78869	2.0463	2.38043	2.77325	3.7207	4.76482	8.09865	17.278
0.100475	0.200184	0.248047	0.341326	0.412355	0.496094	0.57088	0.668466	0.770829	0.876978	0.992188	1.14104	1.2648	1.41408	1.58827	1.78869	2.04698	2.38241	2.77325	3.7207	4.76482	8.11003	17.3651
0.100846	0.200224	0.248047	0.34144	0.412929	0.496094	0.572223	0.668495	0.773522	0.876978	0.992188	1.14149	1.2648	1.41408	1.58827	1.78869	2.04834	2.38719	2.77325	3.7207	4.77128	8.12519	17.3721
0.100874	0.200305	0.248047	0.341607	0.41404	0.496094	0.572534	0.669028	0.773656	0.876978	0.992486	1.14201	1.2648	1.41642	1.58827	1.78869	2.04904	2.38916	2.77325	3.7207	4.77128	8.12519	17.4075
0.100932	0.200364	0.248047	0.341644	0.414101	0.496094	0.572617	0.669272	0.773705	0.877034	0.993571	1.14227	1.2648	1.41804	1.58827	1.78869	2.05081	2.39066	2.77325	3.7207	4.77128	8.12519	17.4075
0.100981	0.200418	0.248047	0.341665	0.414147	0.496094	0.572851	0.66949	0.77388	0.877034	0.994935	1.14231	1.2648	1.41926	1.58827	1.78869	2.05085	2.39848	2.77325	3.7207	4.77128	8.1592	17.471
0.101038	0.200584	0.248047	0.341702	0.414348	0.496094	0.573141	0.670107	0.774298	0.877034	0.9971	1.14231	1.2648	1.42195	1.58827	1.78869	2.05205	2.39955	2.77325	3.7207	4.78086	8.18179	17.4851
0.101144	0.200674	0.248047	0.341777	0.414703	0.496094	0.573175	0.670701	0.774298	0.877034	0.998828	1.14231	1.2648	1.42288	1.58827	1.78869	2.0521	2.40031	2.77325	3.7207	4.79058	8.18555	17.6963
0.101255	0.200685	0.248047	0.342018	0.414796	0.496094	0.573966	0.67073	0.774298	0.877034	0.999909	1.14231	1.2648	1.4236	1.58827	1.78869	2.05258	2.40175	2.77325	3.7207	4.79261	8.1893	17.7074
0.101271	0.200735	0.248047	0.342122	0.415268	0.496094	0.574281	0.670823	0.774298	0.877034	0.999909	1.14263	1.2648	1.42371	1.58827	1.78869	2.05344	2.40284	2.77453	3.7207	4.86056	8.21556	17.7505
0.10168	0.200795	0.248047	0.342198	0.415463	0.496094	0.574568	0.671275	0.774544	0.877034	0.999909	1.14302	1.2648	1.42453	1.58827	1.78869	2.05528	2.4081	2.77759	3.72128	4.8779	8.2193	17.7921
0.101772	0.201116	0.248047	0.342383	0.415644	0.496094	0.574754	0.671623	0.774786	0.877034	0.999909	1.14321	1.2648	1.4251	1.58827	1.78869	2.05536	2.41049	2.79764	3.72534	4.88596	8.24546	17.8111
0.101953	0.201381	0.248047	0.342403	0.416215	0.496094	0.574921	0.671875	0.774873	0.877381	0.999909	1.14344	1.2648	1.42533	1.58827	1.78999	2.05579	2.41104	2.7981	3.72896	4.92359	8.24546	17.8374
0.101953	0.201517	0.248047	0.342598	0.416963	0.496094	0.575464	0.671875	0.776452	0.877841	0.999909	1.14344	1.2648	1.42568	1.58827	1.79018	2.05656	2.41231	2.80633	3.72896	4.9423	8.27897	17.8904
0.101953	0.201589	0.248047	0.342756	0.417213	0.496094	0.575508	0.6727	0.776452	0.879242	1.00174	1.14344	1.2648	1.42662	1.58844	1.79157	2.05837	2.41235	2.80633	3.72896	4.96094	8.27897	17.9024
0.101953	0.201599	0.248047	0.342821	0.417572	0.496094	0.575611	0.672773	0.776452	0.879923	1.00211	1.14344	1.2648	1.42692	1.58846	1.79401	2.05961	2.41245	2.80752	3.72896	4.96094	8.31605	17.9024
0.101953	0.201689	0.248047	0.34283	0.418277	0.496094	0.575632	0.674047	0.776452	0.880626	1.00245	1.14344	1.2648	1.42853	1.58848	1.79467	2.06078	2.41317	2.80864	3.72896	4.96713	8.31605	17.9041
0.101953	0.201784	0.248047	0.343476	0.418568	0.496094	0.575721	0.674428	0.776452	0.88083	1.0025	1.14344	1.2648	1.42951	1.58878	1.79549	2.06237	2.41557	2.82441	3.72896	4.96713	8.31975	17.9915
0.101953	0.201801	0.248047	0.343611	0.41939	0.496094	0.575922	0.674493	0.776455	0.881022	1.00264	1.14344	1.2648	1.4302	1.5888	1.79606	2.06246	2.41627	2.82744	3.72896	4.96713	8.31975	18.075
0.101953	0.20191	0.248047	0.343925	0.419427	0.496094	0.576734	0.674916	0.776681	0.881044	1.00318	1.14409	1.2648	1.4302	1.58938	1.79649	2.06433	2.41844	2.82817	3.72896	4.98568	8.33452	18.0938
0.101953	0.201985	0.248047	0.344081	0.419504	0.496094	0.576734	0.675238	0.776961	0.881113	1.00393	1.14561	1.2648	1.43049	1.58966	1.79734	2.06446	2.41975	2.82817	3.72896	4.98568	8.39337	18.1685
0.101953	0.202207	0.248047	0.344376	0.419773	0.496094	0.576734	0.677104	0.777293	0.881989	1.00403	1.14618	1.2648	1.43233	1.58975	1.79734	2.06501	2.4234	2.82817	3.72896	4.98568	8.39337	18.236
0.101953	0.202726	0.248047	0.344807	0.419842	0.496094	0.576734	0.677104	0.778436	0.882059	1.00404	1.14708	1.2648	1.43286	1.59094	1.80062	2.06684	2.42343	2.82817	3.72896	4.98568	8.42264	18.3556
0.101953	0.203132	0.248047	0.345066	0.419922	0.496094	0.576734	0.677104	0.779659	0.882113	1.00412	1.14814	1.2648	1.43513	1.59143	1.80116	2.06687	2.42376	2.82817	3.72896	4.99185	8.4263	18.4374
0.101953	0.203247	0.248047	0.345291	0.419922	0.496094	0.576734	0.677104	0.780358	0.883042	1.00488	1.14867	1.2648	1.43683	1.59173	1.8031	2.06765	2.42383	2.82817	3.72896	5.01644	8.43359	18.4558
0.101953	0.203416	0.248047	0.345391	0.419922	0.497225	0.577846	0.677104	0.781988	0.883813	1.00568	1.14878	1.2648	1.43705	1.5919	1.80442	2.06913	2.42418	2.82817	3.74661	5.01644	8.43359	18.4708
0.101953	0.20342	0.248047	0.345693	0.419922	0.497922	0.577982	0.677104	0.782849	0.884984	1.00753	1.14921	1.2648	1.4372	1.59249	1.80581	2.07009	2.42662	2.82817	3.74972	5.0195	8.43724	18.5085
0.101953	0.203492	0.248047	0.346083	0.419922	0.497987	0.578093	0.677104	0.783599	0.885624	1.00838	1.14923	1.2648	1.43729	1.59254	1.80581	2.07011	2.42711	2.82817	3.75	5.05918	8.49176	18.5173
0.101953	0.203618	0.248047	0.346276	0.419922	0.498376	0.578717	0.677104	0.783631	0.88589	1.00848	1.14923	1.2648	1.43915	1.59256	1.80581	2.07057	2.43264	2.83502	3.75363	5.0895	8.5243	18.5293
0.101953	0.203855	0.248047	0.346276	0.419922	0.49888	0.579166	0.677104	0.78392	0.886031	1.00876	1.14989	1.2648	1.44078	1.59349	1.80581	2.07182	2.43667	2.85248	3.75363	5.11362	8.5243	18.5709
0.101953	0.203906	0.248047	0.346276	0.419922	0.499351	0.579541	0.677301	0.784393	0.887065	1.0093	1.15052	1.2648	1.44183	1.59458	1.80581	2.07202	2.43737	2.85551	3.75363	5.11362	8.55312	18.5718
0.101953	0.203906	0.248047	0.346276	0.419922	0.49962	0.580548	0.678571	0.784393	0.887648	1.00985	1.1516	1.2648	1.44183	1.59569	1.80581	2.0727	2.44298	2.85776	3.75363	5.17212	8.55312	18.6217
0.101953	0.203906	0.248047	0.346276	0.419922	0.499915	0.580643	0.678592	0.784393	0.887727	1.00996	1.152	1.2648	1.4422	1.59606	1.80581	2.07391	2.44298	2.85923	3.75363	5.17937	8.5675	18.6366
0.101953	0.203906	0.248047	0.346276	0.419922	0.500548	0.58065	0.679046	0.784393	0.88773	1.01001	1.15295	1.2648	1.44274	1.59641	1.80585	2.07437	2.44298	2.8598	3.75363	5.17937	8.59618	18.6448
0.101953	0.203906	0.248047	0.346276	0.419922	0.500616	0.580825	0.679524	0.784393	0.887884	1.01021	1.15347	1.2648	1.44279	1.59702	1.80796	2.07694	2.44298	2.86195	3.7559	5.17937	8.59975	18.646
0.101953	0.203906	0.248047	0.346276	0.419922	0.501258	0.581013	0.680049	0.784393	0.887914	1.01131	1.15389	1.2648	1.44346	1.59703	1.80817	2.0787	2.44298	2.86219	3.76902	5.20898	8.59975	18.6583
0.101953	0.203906	0.248047	0.346276	0.419922	0.501412	0.581063	0.680212	0.784393	0.888913	1.01138	1.15439	1.2648	1.4437	1.59746	1.80906	2.08177	2.44298	2.86411	3.77814	5.20898	8.65325	18.6811
0.101953	0.203906	0.248047	0.346276	0.419922	0.501662	0.581249	0.680245	0.784393	0.889185	1.01338	1.15497	1.2648	1.44391	1.59875	1.81035	2.0843	2.44298	2.86967	3.77814	5.20898	8.65325	18.7125
0.101953	0.203906	0.248047	0.346276	0.419922	0.501677	0.581666	0.681421	0.784393	0.890059	1.01374	1.15538	1.2648	1.44409	1.59971	1.81046	2.08675	2.44298	2.87	3.78627	5.21489	8.65325	18.7179
0.101953	0.203906	0.248047	0.346276	0.420364	0.501988	0.581851	0.681817	0.784393	0.890576	1.0141	1.15618	1.2648	1.44456	1.59994	1.81117	2.08706	2.44298	2.87959	3.79439	5.21489	8.6781	18.7446
0.101953	0.203906	0.248047	0.346276	0.420364	0.502243	0.582032	0.682126	0.784393	0.89075	1.01424	1.15662	1.2648	1.44488	1.60012	1.81151	2.0889	2.44371	2.8927	3.79439	5.21489	8.68164	18.7632
0.101953	0.203906	0.248047	0.346276	0.420364	0.50317	0.585059	0.682285	0.784393	0.892082	1.01437	1.15697	1.26594	1.44492	1.60134	1.81276	2.089	2.44387	2.8927	3.79439	5.21489	8.72406	18.8025
0.101953	0.203906	0.248047	0.346276	0.420364	0.503597	0.585173	0.682559	0.784393	0.892766	1.01479	1.15723	1.26616	1.44492	1.60243	1.81297	2.08997	2.4461	2.8927	3.79439	5.23255	8.72406	18.8401
0.101953	0.203906	0.248047	0.346276	0.420364	0.50366	0.585381	0.682669	0.784393	0.892766	1.01479	1.15747	1.2665	1.44607	1.60356	1.81437	2.09011	2.44612	2.8927	3.79439	5.25602	8.76978	18.8644
0.101953	0.203906	0.248047	0.346276	0.420364	0.503906	0.585772	0.682935	0.784393	0.892766	1.01479	1.15765	1.26695	1.44635	1.60452	1.8162	2.09124	2.44735	2.8927	3.80348	5.25602	8.78509	18.8777
0.101953	0.203906	0.248047	0.346276	0.420364	0.503906	0.586116	0.683922	0.784393	0.892766	1.01502	1.15772	1.26731	1.44635	1.60505	1.8193	2.09302	2.44746	2.8927	3.82586	5.25602	8.7908	18.8777
0.101953	0.203906	0.248047	0.346276	0.420364	0.503906	0.586654	0.683922	0.784393	0.893184	1.01514	1.15871	1.26753	1.44635	1.60508	1.81992	2.09339	2.44755	2.8927	3.83315	5.30264	8.7978	18.9314
0.101953	0.203906	0.248047	0.346276	0.420364	0.503906	0.586693	0.683922	0.784393	0.893282	1.01572	1.15899	1.2689	1.44635	1.60573	1.82002	2.09551	2.44976	2.8927	3.83662	5.30843	8.86399	18.9523
0.101953	0.203906	0.248047	0.346492	0.420364	0.503906	0.586801	0.683922	0.784393	0.893358	1.01621	1.15918	1.26914	1.44635	1.60598	1.82337	2.09634	2.45122	2.8927	3.85072	5.30843	8.88133	19.0238
0.101953	0.203906	0.248047	0.346951	0.420364	0.503906	0.586883	0.683922	0.784393	0.894346	1.01736	1.16004	1.27004	1.44635	1.60628	1.82345	2.09716	2.45234	2.8927	3.85072	5.32579	8.94346	19.1495
0.101953	0.203906	0.248047	0.347544	0.420364	0.503906	0.587492	0.684276	0.784393	0.894346	1.0189	1.16029	1.2703	1.44635	1.60794	1.82374	2.09736	2.45506	2.8927	3.85072	5.32579	8.96064	19.1623
0.101953	0.203906	0.248047	0.34755	0.420364	0.503906	0.587879	0.684566	0.784393	0.894346	1.01943	1.16042	1.27054	1.44635	1.6101	1.82453	2.09931	2.45554	2.8927	3.85072	5.32579	8.96407	19.1905
0.101953	0.203906	0.248047	0.34764	0.420364	0.503991	0.587886	0.684748	0.784393	0.894346	1.01953	1.16063	1.27153	1.44635	1.61123	1.82459	2.09934	2.45554	2.8927	3.85072	5.34309	8.98464	19.196
0.101953	0.203906	0.248047	0.347819	0.420364	0.504027	0.588003	0.684959	0.784393	0.894346	1.0206	1.16093	1.27161	1.44635	1.6123	1.82468	2.09961	2.45554	2.8927	3.85072	5.3546	9.01992	19.2536
0.101953	0.203906	0.248047	0.348248	0.420364	0.50481	0.588821	0.685432	0.784393	0.894346	1.02086	1.16122	1.272	1.44635	1.6123	1.82524	2.1	2.45554	2.8927	3.85072	5.39374	9.09693	19.3031
0.101953	0.203906	0.248047	0.348337	0.420364	0.505137	0.588964	0.686459	0.784393	0.894346	1.02171	1.162	1.27208	1.44635	1.6123	1.82653	2.10059	2.4576	2.8927	3.85072	5.41743	9.14752	19.3317
0.101953	0.203906	0.248047	0.348383	0.420364	0.506028	0.589087	0.687189	0.784393	0.894346	1.02171	1.1624	1.27337	1.44635	1.6123	1.82785	2.10214	2.46018	2.8927	3.85072	5.41743	9.14752	19.3492
0.101953	0.203906	0.248047	0.348433	0.420364	0.506594	0.589676	0.688562	0.784393	0.894346	1.02272	1.16255	1.2742	1.44635	1.6123	1.82798	2.1029	2.46303	2.8927	3.85072	5.44009	9.17773	19.3731
0.101953	0.203906	0.248047	0.34844	0.420364	0.506836	0.589685	0.689119	0.784393	0.894346	1.02272	1.1631	1.27423	1.44635	1.61329	1.82888	2.10432	2.46433	2.89536	3.8587	5.44009	9.18109	19.3752
0.101953	0.203906	0.248047	0.348759	0.420364	0.507004	0.590491	0.689195	0.784393	0.894346	1.02272	1.16388	1.27646	1.44635	1.61329	1.82999	2.10475	2.46511	2.90331	3.86378	5.44009	9.26115	19.4064
0.101953	0.203906	0.248047	0.349091	0.420596	0.507311	0.591691	0.689274	0.784393	0.894346	1.02272	1.16401	1.27674	1.44635	1.61329	1.8303	2.10475	2.46519	2.90331	3.87462	5.45703	9.2678	19.4207
0.101953	0.203906	0.248047	0.349487	0.420766	0.507562	0.591886	0.689651	0.784393	0.894346	1.02272	1.16412	1.2769	1.44635	1.61329	1.83325	2.10475	2.46667	2.90331	3.87462	5.47198	9.30346	19.4254
0.101953	0.203906	0.248047	0.349826	0.421006	0.507921	0.592157	0.690022	0.784393	0.894346	1.02272	1.16507	1.2769	1.44635	1.61329	1.83418	2.10475	2.46892	2.90331	3.88255	5.47625	9.31085	19.4402
0.101953	0.203906	0.248047	0.349849	0.421907	0.508366	0.592386	0.690472	0.784393	0.894346	1.02272	1.16592	1.2769	1.44635	1.61329	1.83498	2.10475	2.47369	2.90331	3.88255	5.47953	9.41272	19.4697
0.101953	0.203906	0.248047	0.349883	0.422157	0.508495	0.592655	0.690672	0.784393	0.894346	1.02272	1.1666	1.2769	1.44635	1.61329	1.83661	2.10504	2.48008	2.90331	3.88308	5.49075	9.42578	19.5265
0.101953	0.203906	0.248047	0.349902	0.422466	0.508531	0.592895	0.691712	0.784393	0.894346	1.02272	1.16675	1.2769	1.44635	1.61348	1.83799	2.10611	2.48047	2.90335	3.8938	5.52862	9.44534	19.8577
0.101953	0.203906	0.248047	0.350449	0.422525	0.508886	0.593484	0.691867	0.784393	0.894346	1.02272	1.16734	1.277	1.44635	1.61446	1.83859	2.10701	2.48047	2.9139	3.907	5.59619	9.44534	19.8825
0.101953	0.203906	0.248047	0.35057	0.422869	0.509241	0.593859	0.69246	0.784393	0.894346	1.02272	1.16781	1.27706	1.44635	1.61481	1.84017	2.1084	2.48047	2.91752	3.91197	5.61266	9.49407	19.9427
0.101953	0.203906	0.248047	0.350791	0.42308	0.509377	0.593859	0.692553	0.784393	0.894346	1.02272	1.16806	1.27747	1.44635	1.6161	1.84071	2.1084	2.48047	2.91954	3.92197	5.6156	9.49407	20.0795
0.101953	0.203906	0.248047	0.350791	0.423108	0.509766	0.593859	0.692553	0.784393	0.894346	1.02272	1.16831	1.27749	1.44635	1.61651	1.84078	2.10993	2.48047	2.92093	3.92197	5.66721	9.50703	20.2626
0.101953	0.203906	0.248047	0.350791	0.423813	0.509766	0.593859	0.692553	0.784393	0.894346	1.02272	1.16891	1.27868	1.44635	1.61707	1.84193	2.11057	2.48047	2.92487	3.92197	5.66721	9.58116	20.498
0.101953	0.203906	0.248047	0.350791	0.423946	0.509766	0.593859	0.692553	0.784393	0.894346	1.02272	1.16952	1.28022	1.44635	1.61707	1.84374	2.11108	2.48047	2.92692	3.92197	5.66721	9.6611	20.6118
0.101953	0.203906	0.248047	0.350791	0.42398	0.509766	0.593859	0.692602	0.784393	0.894346	1.02272	1.16972	1.28054	1.44635	1.61707	1.84374	2.11204	2.48047	2.92706	3.92197	5.66721	9.67701	20.661
0.101953	0.203906	0.248047	0.350791	0.424403	0.509766	0.593859	0.694591	0.784393	0.894346	1.02272	1.17003	1.28197	1.44635	1.61791	1.84374	2.11204	2.48047	2.92895	3.92197	5.66721	9.72458	20.6952
0.101953	0.203906	0.248047	0.350791	0.424738	0.509766	0.593859	0.695047	0.784393	0.894346	1.02272	1.17003	1.28276	1.44635	1.61935	1.84411	2.11333	2.48047	2.93552	3.92197	5.71047	9.72458	20.8492
0.101953	0.203906	0.248047	0.350791	0.424758	0.509766	0.594347	0.695671	0.784393	0.894346	1.02272	1.17003	1.28739	1.44635	1.62047	1.84613	2.11577	2.48047	2.94194	3.92197	5.72661	9.87837	21.0241
0.101953	0.203906	0.248047	0.350791	0.42482	0.509766	0.594372	0.696395	0.784393	0.894346	1.02272	1.17003	1.28862	1.44635	1.62176	1.84651	2.11578	2.48047	2.9462	3.94894	5.76942	9.8846	21.0971
0.101953	0.203906	0.248047	0.350791	0.424922	0.509766	0.594439	0.697119	0.784393	0.894346	1.02272	1.17062	1.28922	1.44635	1.62347	1.84884	2.11671	2.48047	2.95321	3.95204	5.76942	9.8983	21.2598
0.101953	0.203906	0.248047	0.350791	0.424925	0.509766	0.594484	0.69778	0.784393	0.894346	1.02272	1.17093	1.29044	1.44635	1.62383	1.84889	2.11699	2.48047	2.95842	3.95789	5.79071	9.92498	21.3378
0.101953	0.203906	0.248047	0.350791	0.42499	0.509766	0.594484	0.697847	0.784393	0.894346	1.02272	1.17172	1.29058	1.44699	1.62441	1.84944	2.11853	2.48047	2.97314	3.96875	5.79071	9.93427	21.3637
0.101953	0.203906	0.248047	0.350791	0.425358	0.509766	0.594484	0.697951	0.784393	0.894346	1.02272	1.17343	1.29303	1.44749	1.62511	1.84955	2.11931	2.48047	2.97656	3.96875	5.80663	9.93427	21.4256
0.101953	0.203906	0.248047	0.350791	0.42551	0.509766	0.594484	0.697956	0.784393	0.894346	1.02272	1.17381	1.29484	1.44787	1.62536	1.84987	2.11931	2.48047	2.97656	3.96875	5.80663	9.94974	21.5401
0.101953	0.203906	0.248047	0.350791	0.425573	0.509766	0.594484	0.698011	0.784393	0.894346	1.02272	1.17419	1.29484	1.44796	1.62625	1.85009	2.11931	2.48047	2.97656	3.96908	5.86096	9.94974	21.5929
0.101953	0.203906	0.248047	0.350791	0.425634	0.509766	0.594484	0.698218	0.784393	0.894346	1.02272	1.17518	1.29524	1.44903	1.6263	1.85268	2.11931	2.48047	2.9766	3.97649	5.91684	9.94974	21.6157
0.101953	0.203906	0.248047	0.350791	0.426175	0.509766	0.594484	0.698559	0.784393	0.894346	1.02272	1.17659	1.29564	1.45062	1.62636	1.8532	2.11931	2.48047	2.97742	3.97649	5.96345	9.94974	21.6498
0.101953	0.204239	0.248047	0.350791	0.426616	0.509766	0.594484	0.699045	0.784393	0.894346	1.02272	1.17659	1.29593	1.45166	1.6269	1.85342	2.11931	2.48047	2.98173	3.97649	5.99432	10.1001	21.6952
0.101953	0.205087	0.248047	0.350791	0.426647	0.509766	0.594484	0.699603	0.784393	0.894346	1.02272	1.17659	1.29595	1.45166	1.62736	1.85437	2.12082	2.48047	2.98233	3.97649	6.00458	10.1214	21.8338
0.101953	0.205127	0.248047	0.350791	0.426678	0.509766	0.594484	0.700217	0.784393	0.894513	1.02272	1.17683	1.29708	1.45395	1.6285	1.85522	2.12294	2.48047	2.98416	3.97649	6.03524	10.1336	22.065
0.101953	0.205166	0.248047	0.350791	0.426717	0.509766	0.594484	0.700224	0.784393	0.894954	1.02272	1.17688	1.29765	1.45577	1.62938	1.85595	2.1251	2.48047	2.98658	3.97649	6.12631	10.2062	22.2317
0.101953	0.205417	0.248047	0.350791	0.427357	0.509766	0.594484	0.700934	0.784393	0.895312	1.02272	1.17689	1.29845	1.45609	1.62984	1.85636	2.13288	2.48047	2.98688	3.97649	6.16136	10.2152	22.2594
0.101953	0.20545	0.248047	0.350791	0.427744	0.509766	0.594484	0.701583	0.784393	0.895374	1.02272	1.17836	1.29884	1.45612	1.63111	1.85781	2.13291	2.48047	2.98688	3.97649	6.16435	10.2182	22.2773
0.101953	0.205749	0.248047	0.350791	0.428006	0.509766	0.594484	0.701583	0.784393	0.895462	1.02272	1.17913	1.29914	1.45708	1.63127	1.85858	2.13315	2.48047	2.98688	3.99964	6.20117	10.2453	22.3256
0.101953	0.205999	0.248047	0.350791	0.428238	0.509766	0.594484	0.701583	0.784393	0.896042	1.02272	1.17943	1.30081	1.45991	1.63127	1.85872	2.13334	2.48047	2.98688	3.99964	6.20117	10.3171	22.3297
0.101953	0.206022	0.248047	0.350791	0.428238	0.509766	0.594484	0.701583	0.784393	0.896878	1.02272	1.17998	1.30143	1.45994	1.6316	1.85907	2.13378	2.48047	2.98688	3.99964	6.22098	10.418	22.3311
0.101953	0.206108	0.248047	0.350791	0.428238	0.509766	0.594795	0.701583	0.784393	0.896938	1.02272	1.18026	1.30241	1.4625	1.63201	1.86053	2.13378	2.48047	2.98688	3.99964	6.22098	10.4915	22.3366
0.101953	0.206256	0.248047	0.350791	0.428238	0.509766	0.595097	0.701583	0.78471	0.89733	1.02272	1.18085	1.30244	1.46258	1.63203	1.86081	2.13378	2.48211	2.98688	4.00732	6.22098	10.5237	22.3916
0.101953	0.206477	0.248047	0.350791	0.428238	0.509766	0.595193	0.701583	0.784998	0.897389	1.02272	1.18107	1.30277	1.46312	1.63222	1.86149	2.13378	2.48359	2.98688	4.00732	6.24566	10.5529	22.4753
0.101953	0.206665	0.248047	0.350791	0.428238	0.509766	0.595205	0.701583	0.786079	0.897777	1.02272	1.18126	1.30564	1.4655	1.63252	1.86262	2.13378	2.48485	2.98688	4.0134	6.26042	10.6689	22.5941
0.101953	0.206719	0.248047	0.350791	0.428238	0.509766	0.595223	0.701583	0.786698	0.898227	1.02308	1.18143	1.30564	1.46788	1.63315	1.86418	2.13378	2.48642	2.98688	4.02709	6.27514	10.6862	22.7081
0.101953	0.206807	0.248047	0.350791	0.428279	0.510415	0.596461	0.701583	0.786928	0.899449	1.02427	1.1817	1.30564	1.46857	1.63485	1.86429	2.13378	2.48899	2.9878	4.03791	6.28005	10.7693	22.8014
0.101953	0.207417	0.248047	0.350791	0.428325	0.510609	0.596469	0.701583	0.787916	0.902904	1.02433	1.18176	1.30722	1.46913	1.63485	1.86448	2.13378	2.48968	2.99437	4.03791	6.28005	10.8064	22.854
0.101953	0.207446	0.248047	0.350791	0.428538	0.510857	0.597166	0.701583	0.78816	0.902904	1.02462	1.18195	1.30753	1.46913	1.63508	1.86448	2.13378	2.49033	2.99507	4.04176	6.31424	10.9141	22.9185
0.101953	0.207498	0.248059	0.350791	0.428651	0.510857	0.597344	0.701583	0.788675	0.902904	1.02462	1.18209	1.30806	1.46913	1.63559	1.86448	2.13378	2.49162	2.99554	4.05146	6.32398	10.984	22.9292
0.101953	0.20754	0.248654	0.350791	0.429828	0.510857	0.597495	0.701583	0.78953	0.902904	1.02462	1.18284	1.30849	1.47039	1.6385	1.86476	2.13378	2.49284	2.99716	4.06158	6.3531	11.0095	23.0697
0.101953	0.207549	0.248701	0.350791	0.429884	0.510857	0.597551	0.701583	0.789554	0.902904	1.02462	1.18296	1.30999	1.47076	1.64042	1.86476	2.13378	2.49284	2.99716	4.06827	6.36877	11.0513	23.1336
0.101953	0.207676	0.248816	0.350791	0.430231	0.510857	0.59774	0.701583	0.789647	0.902904	1.025	1.18329	1.31024	1.4718	1.64082	1.86533	2.13378	2.49284	2.99716	4.06827	6.37727	11.093	23.3283
0.101953	0.207923	0.249292	0.350791	0.430252	0.510857	0.59788	0.701583	0.790127	0.902904	1.02516	1.18333	1.31056	1.47354	1.64228	1.86968	2.13378	2.49284	2.99716	4.06827	6.44922	11.2171	23.5318
0.101953	0.208315	0.249486	0.350791	0.430877	0.511362	0.598486	0.701583	0.791654	0.902948	1.02516	1.18444	1.31121	1.47434	1.64394	1.87066	2.13378	2.49284	2.99716	4.06827	6.45399	11.25	23.5697
0.101953	0.208389	0.249506	0.350791	0.431301	0.511362	0.598632	0.701583	0.792036	0.902965	1.02516	1.18523	1.3116	1.4756	1.64394	1.87119	2.13378	2.49284	2.99716	4.06827	6.49201	11.3371	23.74
0.101953	0.20841	0.250131	0.350791	0.431463	0.511362	0.598804	0.701583	0.792307	0.903992	1.02516	1.18599	1.31382	1.47571	1.64394	1.8717	2.13378	2.49284	3.00229	4.06827	6.49201	11.4215	23.8332
0.101953	0.208644	0.250334	0.350791	0.431479	0.511362	0.598837	0.701583	0.792307	0.904539	1.02516	1.18606	1.31387	1.4763	1.64407	1.8719	2.13378	2.49284	3.00322	4.07328	6.49201	11.4263	24.0721
0.101953	0.208694	0.250838	0.350791	0.431634	0.511362	0.599334	0.701583	0.792307	0.904539	1.02698	1.18609	1.31417	1.47872	1.64499	1.87258	2.13378	2.49284	3.01715	4.07731	6.51094	11.4452	24.0848
0.101953	0.209449	0.251157	0.350791	0.43187	0.511362	0.599699	0.701583	0.792487	0.904539	1.0273	1.18611	1.31456	1.48081	1.64525	1.87402	2.13378	2.49284	3.01762	4.09059	6.51094	11.7003	24.141
0.101953	0.209501	0.251185	0.350791	0.432486	0.511362	0.59992	0.701583	0.79281	0.905163	1.02769	1.18731	1.31458	1.48182	1.64555	1.8742	2.13378	2.49284	3.01762	4.09089	6.52509	11.87	24.1919
0.101953	0.209605	0.251353	0.350791	0.43255	0.511362	0.600602	0.701583	0.793037	0.905261	1.02779	1.18772	1.31525	1.48193	1.64593	1.87571	2.13378	2.49284	3.01762	4.09089	6.56739	11.8881	24.3541
0.101953	0.209752	0.25155	0.350791	0.43255	0.511362	0.601002	0.701583	0.793095	0.906111	1.02876	1.189	1.3155	1.48263	1.6471	1.87584	2.13568	2.49284	3.01762	4.09089	6.59077	11.9166	24.3541
0.101953	0.209757	0.251591	0.350791	0.43255	0.511362	0.601236	0.701583	0.793181	0.906232	1.02897	1.18917	1.31567	1.48336	1.64721	1.87635	2.1409	2.49284	3.01762	4.09089	6.67887	11.9192	24.3756
0.101953	0.209782	0.251607	0.350791	0.43255	0.511362	0.601574	0.701583	0.793568	0.906615	1.0292	1.18926	1.31611	1.4837	1.64949	1.87682	2.14098	2.49284	3.01762	4.10591	6.67887	11.9249	24.4008
0.101953	0.209786	0.251625	0.350791	0.43255	0.511362	0.601862	0.701583	0.793967	0.907085	1.03012	1.1904	1.31708	1.48452	1.65174	1.87703	2.14098	2.49284	3.01762	4.12832	6.70186	11.9707	24.6579
0.101953	0.209815	0.251861	0.350791	0.43255	0.511362	0.60228	0.701583	0.794137	0.907162	1.03013	1.19101	1.31712	1.48561	1.65215	1.87754	2.14098	2.49284	3.01762	4.15802	6.77036	12.1036	24.7575
0.101953	0.210349	0.251899	0.350791	0.43255	0.511362	0.602877	0.701583	0.794137	0.908001	1.03046	1.19277	1.31839	1.48573	1.65391	1.88023	2.14139	2.49284	3.01762	4.15802	6.81113	12.1137	24.7712
0.101953	0.210435	0.251953	0.350791	0.43255	0.511362	0.603759	0.701583	0.794137	0.908262	1.03063	1.19294	1.31839	1.48828	1.6543	1.88044	2.14278	2.49284	3.02562	4.15802	6.81113	12.2149	24.8096
0.101953	0.210451	0.251953	0.350791	0.43255	0.511362	0.603924	0.701583	0.794137	0.908496	1.03071	1.19344	1.31839	1.48828	1.65524	1.88055	2.14311	2.49551	3.0278	4.15802	6.84268	12.3152	24.8468
0.101953	0.210599	0.251953	0.350791	0.43255	0.511362	0.603994	0.701583	0.794137	0.908548	1.03088	1.19364	1.31943	1.48828	1.65643	1.88122	2.14621	2.49823	3.0278	4.20261	6.86064	12.3352	24.8654
0.101953	0.210679	0.251953	0.350791	0.43255	0.511362	0.604216	0.703351	0.794137	0.908577	1.03177	1.19364	1.31964	1.48828	1.65643	1.88153	2.1467	2.50048	3.0278	4.20967	6.86064	12.4048	24.8839
0.101953	0.210745	0.251953	0.350791	0.432768	0.511362	0.604433	0.703434	0.794137	0.908723	1.03256	1.19472	1.32003	1.48828	1.65749	1.88237	2.14723	2.50074	3.0278	4.2168	6.86064	12.4246	24.9198
0.101953	0.210936	0.251953	0.350791	0.43318	0.511362	0.604719	0.703957	0.794137	0.908802	1.03477	1.19474	1.32061	1.48828	1.65766	1.88238	2.1487	2.50188	3.0278	4.2168	6.89642	12.4246	25.0466
0.101953	0.210982	0.251953	0.350791	0.433771	0.511362	0.604885	0.704258	0.794137	0.908947	1.03484	1.19537	1.32165	1.48828	1.65799	1.88284	2.15096	2.50336	3.0278	4.2168	6.89642	12.5233	25.0822
0.101953	0.211029	0.251953	0.350791	0.43385	0.511362	0.605082	0.70456	0.794137	0.909131	1.03493	1.19604	1.32187	1.48828	1.6582	1.88502	2.15269	2.50678	3.0278	4.2168	6.89642	12.5356	25.1557
0.101953	0.211045	0.251953	0.350791	0.434711	0.511362	0.605136	0.704693	0.794137	0.909523	1.035	1.19611	1.32259	1.48828	1.65918	1.8865	2.15461	2.51038	3.0278	4.2168	6.94974	12.6017	25.1606
0.101953	0.211053	0.251953	0.350791	0.434887	0.511362	0.60562	0.705097	0.794137	0.913073	1.03525	1.1971	1.32418	1.48828	1.65927	1.88734	2.15818	2.51211	3.0278	4.2168	6.94974	12.6299	25.6258
0.101953	0.211072	0.251953	0.350791	0.435315	0.511362	0.60562	0.705892	0.794137	0.913368	1.03657	1.19738	1.32539	1.48828	1.66021	1.88865	2.15953	2.51307	3.0281	4.22254	6.96301	12.648	25.936
0.101953	0.211277	0.251953	0.350791	0.435726	0.511362	0.60562	0.70617	0.794137	0.914643	1.03683	1.19764	1.32539	1.48828	1.66064	1.88907	2.16142	2.52046	3.04128	4.22409	7.02021	12.728	26.026
0.101953	0.211394	0.251953	0.350791	0.436117	0.511362	0.60562	0.70618	0.794137	0.915792	1.03709	1.19888	1.32539	1.48828	1.66232	1.88907	2.16172	2.52374	3.0473	4.22409	7.02021	12.7497	26.2238
0.101953	0.211594	0.251953	0.350791	0.436314	0.511362	0.60562	0.706282	0.794137	0.91586	1.03727	1.19916	1.32539	1.48828	1.66299	1.88907	2.1668	2.52454	3.05288	4.22409	7.05518	12.7775	26.4435
0.101953	0.211785	0.251953	0.350791	0.436988	0.511362	0.605658	0.70793	0.794137	0.916025	1.03751	1.20012	1.32582	1.48828	1.66359	1.88907	2.16782	2.52959	3.05453	4.23863	7.05518	12.8984	26.4993
0.101953	0.211815	0.251953	0.350791	0.437186	0.511362	0.606639	0.708043	0.794137	0.91615	1.038	1.20065	1.3259	1.48828	1.66395	1.88907	2.16848	2.52959	3.05519	4.23863	7.09431	12.9793	26.6347
0.101953	0.211864	0.252458	0.350791	0.437561	0.511362	0.606855	0.708892	0.794676	0.916989	1.03892	1.20101	1.32593	1.48828	1.66395	1.88907	2.16889	2.52959	3.05784	4.23863	7.10298	13.1465	26.8819
0.101953	0.211967	0.252895	0.350791	0.437664	0.511362	0.607225	0.709225	0.794831	0.917542	1.0395	1.20135	1.32604	1.48881	1.66395	1.88907	2.16974	2.52959	3.05816	4.2393	7.10298	13.1862	27.2005
0.101953	0.212411	0.253289	0.350791	0.438878	0.511362	0.607291	0.709285	0.795396	0.917578	1.03972	1.20164	1.32677	1.4893	1.66395	1.88907	2.17101	2.52959	3.06315	4.24588	7.19336	13.2049	27.5377
0.101953	0.212487	0.253854	0.350791	0.439152	0.511362	0.608712	0.709448	0.795697	0.917578	1.03989	1.20274	1.32791	1.4897	1.66395	1.89004	2.17327	2.52959	3.06315	4.24588	7.19336	13.2305	27.8487
0.101953	0.21251	0.254167	0.350791	0.439948	0.511362	0.608887	0.709713	0.796279	0.917578	1.03992	1.20324	1.32791	1.49138	1.66395	1.89242	2.17567	2.52959	3.06978	4.25794	7.19763	13.3577	28.2817
0.101953	0.212544	0.254319	0.350791	0.440407	0.511362	0.609015	0.709776	0.796279	0.917578	1.04006	1.20347	1.32791	1.49262	1.66395	1.89308	2.18281	2.52959	3.07257	4.26756	7.21045	13.4037	28.8119
0.101953	0.212849	0.255088	0.350791	0.440512	0.511362	0.609048	0.710868	0.796279	0.917687	1.04012	1.20348	1.32791	1.49329	1.66395	1.89363	2.183	2.52959	3.07295	4.26756	7.21045	13.445	29.048
0.101953	0.213159	0.255286	0.350791	0.440522	0.511362	0.610487	0.710992	0.796279	0.918354	1.04043	1.20362	1.32816	1.49344	1.66395	1.89418	2.1839	2.52959	3.07625	4.26756	7.23175	13.4518	29.2706
0.101953	0.213389	0.255431	0.350791	0.440648	0.511362	0.610627	0.71123	0.796279	0.918412	1.04044	1.20378	1.32845	1.49344	1.66395	1.89482	2.18584	2.52959	3.08585	4.26756	7.2445	13.5974	29.2958
0.102007	0.213442	0.255742	0.350791	0.440793	0.511362	0.610702	0.711473	0.796279	0.919213	1.04073	1.20402	1.32889	1.49344	1.66395	1.89497	2.18595	2.52959	3.09414	4.26756	7.26146	13.6448	29.6434
0.102188	0.213627	0.25594	0.350791	0.441072	0.511362	0.610767	0.711832	0.796279	0.919885	1.04108	1.20538	1.32911	1.49344	1.66395	1.89644	2.1912	2.52959	3.09515	4.26756	7.26146	13.7593	30.029
0.102294	0.213758	0.256442	0.350791	0.441263	0.511362	0.611415	0.71198	0.796279	0.921135	1.04167	1.20544	1.32931	1.49344	1.66395	1.89644	2.1977	2.52959	3.10573	4.26756	7.26146	14.0053	30.4047
0.102417	0.213821	0.257006	0.350791	0.441415	0.511362	0.611415	0.71227	0.796279	0.921508	1.04202	1.2059	1.33038	1.49344	1.66395	1.89644	2.1977	2.52959	3.10802	4.26756	7.29528	14.0317	30.4411
0.10254	0.213897	0.257529	0.350791	0.44149	0.511974	0.611415	0.712631	0.796279	0.922091	1.0421	1.20675	1.3305	1.49448	1.66403	1.89719	2.1977	2.53295	3.10802	4.28195	7.29528	14.1038	30.4623
0.102543	0.213922	0.257655	0.350791	0.441554	0.512509	0.611415	0.712631	0.796441	0.922386	1.04467	1.20718	1.33208	1.49624	1.66589	1.89859	2.1977	2.53322	3.10802	4.29162	7.29949	14.406	30.5209
0.102588	0.213959	0.258201	0.350791	0.442633	0.513107	0.611415	0.713036	0.796727	0.922465	1.04477	1.20838	1.33276	1.49652	1.66704	1.89991	2.2008	2.5349	3.10802	4.31932	7.29949	14.5166	30.9512
0.102614	0.214001	0.258937	0.350791	0.443227	0.513455	0.611719	0.713672	0.796746	0.923225	1.04493	1.21048	1.33322	1.49687	1.66856	1.89997	2.20202	2.54071	3.10802	4.33195	7.29949	14.5166	31.4198
0.102641	0.214291	0.259562	0.350791	0.443257	0.514952	0.611719	0.713672	0.796746	0.923984	1.04499	1.21124	1.3333	1.49794	1.67061	1.90069	2.20261	2.54102	3.10802	4.33195	7.29949	14.5166	32.0864
0.102688	0.214489	0.259616	0.350791	0.443694	0.515139	0.611719	0.713672	0.797149	0.925286	1.045	1.21124	1.33382	1.49858	1.67065	1.90128	2.20313	2.54182	3.11277	4.33905	7.32474	14.6032	32.6914
0.10299	0.214495	0.259805	0.350791	0.443856	0.515315	0.611719	0.713672	0.797251	0.925438	1.0463	1.21287	1.33458	1.49858	1.67126	1.90175	2.20565	2.54456	3.11892	4.35544	7.32474	14.7708	32.9529
0.103004	0.214562	0.260132	0.350791	0.444393	0.515614	0.611719	0.713772	0.797552	0.926212	1.0465	1.21294	1.33482	1.49858	1.67216	1.90374	2.20871	2.54475	3.11893	4.37187	7.32894	14.9014	33.0042
0.103137	0.214597	0.260486	0.350791	0.444714	0.515881	0.611719	0.7139	0.797561	0.926759	1.04664	1.21334	1.33493	1.49903	1.67418	1.90463	2.21027	2.54484	3.12661	4.39954	7.37496	14.9241	33.1994
0.103145	0.214857	0.260588	0.350791	0.444931	0.516058	0.611719	0.714778	0.7976	0.926797	1.04808	1.21367	1.33568	1.49977	1.6743	1.90464	2.2112	2.54626	3.12824	4.41635	7.37496	15.0166	33.339
0.103201	0.214954	0.26133	0.350791	0.445087	0.516532	0.611719	0.715114	0.79775	0.927015	1.04963	1.214	1.33577	1.50087	1.67432	1.90506	2.21205	2.5538	3.1288	4.41977	7.37496	15.0881	33.4799
0.103296	0.215962	0.26143	0.350791	0.445517	0.516867	0.611719	0.715169	0.797799	0.927092	1.04966	1.21525	1.33577	1.50097	1.67487	1.90556	2.21308	2.5538	3.13019	4.43184	7.37496	15.1125	33.568
0.103563	0.216214	0.261709	0.350791	0.445646	0.517228	0.611719	0.71642	0.797817	0.927231	1.04967	1.2153	1.33577	1.50116	1.67492	1.90565	2.21506	2.5538	3.13021	4.4372	7.39995	15.1857	33.612
0.103571	0.21628	0.261877	0.350791	0.445931	0.517244	0.611758	0.716506	0.798814	0.927546	1.04967	1.21607	1.33577	1.50217	1.67554	1.90621	2.21549	2.5538	3.13757	4.46284	7.43313	15.2463	33.6147
0.103599	0.216401	0.262228	0.350791	0.446113	0.517324	0.611968	0.716524	0.798849	0.927638	1.04967	1.21635	1.33577	1.50236	1.67757	1.90628	2.21568	2.5538	3.13757	4.46484	7.43313	15.3007	33.7243
0.103778	0.216454	0.26283	0.350791	0.446296	0.518263	0.612493	0.717218	0.799284	0.928322	1.0497	1.21663	1.33577	1.50281	1.67794	1.90703	2.21654	2.5538	3.13757	4.46484	7.45792	15.3087	34.2628
0.103788	0.216457	0.262986	0.350791	0.446299	0.518309	0.61312	0.717563	0.799338	0.928535	1.04981	1.21675	1.33577	1.5038	1.67808	1.90798	2.21739	2.5538	3.13757	4.46484	7.46205	15.3148	34.7425
0.103825	0.216576	0.263195	0.350791	0.44634	0.518782	0.613478	0.717563	0.799543	0.929611	1.05038	1.21681	1.33577	1.50472	1.67907	1.90812	2.2186	2.5538	3.13757	4.46484	7.49906	15.3228	35.6575
0.103838	0.216609	0.26325	0.350791	0.44656	0.518836	0.613721	0.717697	0.799776	0.929905	1.05124	1.21898	1.33577	1.50513	1.68003	1.90828	2.2186	2.5538	3.13757	4.47173	7.50726	15.3328	35.6998
0.10384	0.216823	0.26333	0.350791	0.447013	0.519158	0.613793	0.717984	0.800599	0.931124	1.05161	1.21954	1.33577	1.50528	1.68192	1.90835	2.2186	2.5538	3.14002	4.47173	7.50726	15.3749	35.906
0.103852	0.216886	0.263383	0.350791	0.447173	0.519441	0.614365	0.718255	0.800611	0.931636	1.05184	1.22023	1.33577	1.50544	1.68279	1.90896	2.2186	2.5538	3.142	4.47173	7.53181	15.3789	35.9668
0.103967	0.217218	0.2634	0.350791	0.447173	0.519708	0.614875	0.718583	0.801043	0.932485	1.05199	1.22149	1.33577	1.50616	1.68638	1.90911	2.2186	2.5538	3.14257	4.47173	7.54405	15.4209	36.4637
0.104042	0.217461	0.263533	0.350791	0.447173	0.519861	0.615179	0.719	0.801751	0.93298	1.05202	1.22149	1.33577	1.50766	1.6864	1.91206	2.2186	2.5538	3.15004	4.47173	7.54405	15.4229	36.5901
0.104113	0.217634	0.263776	0.350791	0.447173	0.519861	0.615269	0.71914	0.802318	0.933041	1.05219	1.22149	1.33577	1.50812	1.6869	1.91332	2.2186	2.5538	3.15712	4.49021	7.55627	15.4527	36.6447
0.104304	0.21767	0.263877	0.350791	0.447173	0.519861	0.615519	0.719242	0.80235	0.933395	1.05232	1.22149	1.33577	1.50845	1.6869	1.91335	2.2186	2.5538	3.1746	4.49232	7.55627	15.5777	36.6447
0.104481	0.217704	0.263958	0.350791	0.447173	0.519861	0.615975	0.719496	0.802645	0.933734	1.05237	1.22149	1.33577	1.50881	1.6869	1.91339	2.2186	2.5538	3.17511	4.50369	7.56035	15.6191	36.6682
0.104652	0.217838	0.263991	0.350791	0.447173	0.519861	0.616389	0.719844	0.803	0.934021	1.05237	1.22149	1.33577	1.50881	1.6869	1.91417	2.2186	2.5538	3.17562	4.52643	7.57254	15.6348	36.7796
0.104678	0.218565	0.264061	0.350791	0.447173	0.519861	0.617304	0.720199	0.80305	0.934981	1.05237	1.22149	1.33577	1.50881	1.6869	1.91421	2.2186	2.5538	3.17655	4.52643	7.58878	15.6604	36.8865
0.104692	0.218725	0.264074	0.350791	0.447173	0.519861	0.617425	0.720443	0.803342	0.935279	1.05237	1.22242	1.33577	1.50881	1.69015	1.91442	2.2186	2.5538	3.18196	4.52643	7.59283	15.6879	36.9715
0.105362	0.218963	0.264835	0.350791	0.447173	0.519861	0.6178	0.720589	0.803345	0.935736	1.05237	1.22254	1.33577	1.50881	1.6903	1.91514	2.2186	2.5538	3.18456	4.52643	7.60902	15.7681	37.0745
0.105554	0.219025	0.264962	0.350791	0.447173	0.519861	0.618566	0.720917	0.803396	0.936252	1.05237	1.22278	1.33577	1.50881	1.6919	1.91587	2.22233	2.5538	3.18502	4.56029	7.65738	15.7837	37.2145
0.105697	0.21907	0.265582	0.350791	0.447173	0.519861	0.618834	0.720917	0.80366	0.937042	1.05237	1.22283	1.33577	1.50881	1.6932	1.91734	2.22766	2.5538	3.18623	4.56029	7.65738	15.8304	37.5592
0.105855	0.219079	0.265582	0.350791	0.447173	0.519861	0.618945	0.720917	0.803662	0.937072	1.05237	1.22283	1.33577	1.50881	1.69394	1.92077	2.23145	2.5538	3.18766	4.56029	7.6614	15.9098	37.5609
0.105947	0.219149	0.265582	0.350791	0.447173	0.519861	0.620117	0.720917	0.80412	0.937818	1.05305	1.22344	1.33577	1.50881	1.69433	1.92163	2.23242	2.5538	3.18905	4.57376	7.68945	15.962	38.0443
0.106032	0.219386	0.265582	0.350791	0.447173	0.519861	0.620117	0.720917	0.804568	0.937877	1.05388	1.22344	1.33577	1.50881	1.69451	1.92201	2.23242	2.5538	3.20888	4.57376	7.69345	15.9697	38.3391
0.106083	0.219538	0.265582	0.350791	0.447173	0.520251	0.620117	0.720917	0.805353	0.937972	1.05432	1.22362	1.33577	1.50881	1.69684	1.92206	2.23242	2.55506	3.21625	4.61394	7.70145	16.0293	38.9173
0.106179	0.219582	0.265582	0.351021	0.447173	0.52026	0.620117	0.720917	0.805416	0.938974	1.05488	1.22381	1.33577	1.50881	1.69684	1.92395	2.23242	2.55681	3.22248	4.61394	7.71741	16.0389	38.9315
0.106314	0.219593	0.265582	0.351466	0.447173	0.520304	0.620117	0.720917	0.806137	0.938974	1.05534	1.22604	1.33577	1.50881	1.69684	1.92536	2.23242	2.55681	3.22461	4.61581	7.7651	16.0772	39.1608
0.106434	0.220092	0.265582	0.351512	0.447173	0.520339	0.620117	0.720917	0.806441	0.938974	1.05562	1.22612	1.33577	1.50881	1.69702	1.92701	2.23242	2.55681	3.22461	4.6339	7.76906	16.1707	39.251
0.106503	0.220208	0.265582	0.351635	0.447173	0.520645	0.620117	0.721275	0.806746	0.938974	1.05749	1.22613	1.33577	1.50881	1.69821	1.92866	2.23242	2.55681	3.22461	4.66038	7.78488	16.1916	39.2902
0.106504	0.220244	0.265582	0.352416	0.447173	0.520706	0.620117	0.721732	0.80677	0.938974	1.05797	1.22766	1.33577	1.50881	1.69828	1.93054	2.23242	2.56361	3.22461	4.66038	7.78883	16.2598	39.4043
0.106514	0.220386	0.265582	0.352499	0.447173	0.521299	0.620117	0.722461	0.806974	0.93932	1.05966	1.22768	1.33577	1.50881	1.69848	1.93096	2.23242	2.5661	3.22461	4.66214	7.84393	16.3372	39.4738
0.106585	0.220568	0.265582	0.352686	0.447173	0.521881	0.620117	0.722461	0.807245	0.939961	1.05966	1.22774	1.33577	1.50881	1.69914	1.93371	2.23242	2.57023	3.22461	4.66523	7.88305	16.3523	39.8461
0.106681	0.221015	0.265582	0.352697	0.447173	0.522769	0.620117	0.722461	0.807252	0.939961	1.05966	1.22777	1.33577	1.50881	1.70051	1.93419	2.23242	2.57757	3.22461	4.68014	7.88305	16.3579	40.2486
0.106808	0.221099	0.265582	0.352816	0.447173	0.522773	0.620117	0.722667	0.807293	0.939961	1.05966	1.22817	1.33577	1.50881	1.70055	1.93638	2.23242	2.57841	3.22461	4.69785	7.88305	16.3786	40.3959
0.107231	0.221334	0.265582	0.353036	0.447173	0.522991	0.620117	0.72297	0.807445	0.939961	1.05966	1.2282	1.33577	1.50881	1.70055	1.93731	2.23242	2.58268	3.22461	4.69981	7.89475	16.3805	40.626
0.107266	0.221523	0.265582	0.353135	0.447173	0.523081	0.620117	0.722971	0.808621	0.939961	1.05966	1.2297	1.33577	1.50881	1.70068	1.93731	2.23242	2.58503	3.22461	4.70636	7.9375	16.4011	41.0666
0.107289	0.22154	0.265582	0.35333	0.447173	0.523315	0.620117	0.723175	0.80885	0.939961	1.05966	1.23103	1.33577	1.50881	1.70111	1.93731	2.23242	2.58738	3.22461	4.71289	7.95299	16.4255	41.1025
0.107295	0.221687	0.265582	0.353424	0.447173	0.523569	0.620117	0.723175	0.80891	0.94002	1.05966	1.23128	1.33577	1.50884	1.70112	1.93731	2.23242	2.58796	3.22461	4.71289	7.97231	16.4423	41.3019
0.107412	0.221707	0.265582	0.353707	0.447173	0.523647	0.620117	0.723175	0.809147	0.940123	1.05966	1.23168	1.33577	1.5091	1.70336	1.93731	2.23242	2.58969	3.22461	4.71289	7.98773	16.4423	41.6778
0.107432	0.222184	0.265582	0.353805	0.447256	0.524495	0.620117	0.723175	0.80931	0.940315	1.05966	1.2319	1.33577	1.50934	1.70619	1.93731	2.23362	2.58969	3.22461	4.71941	7.98773	16.4704	41.7456
0.107542	0.222278	0.265582	0.35427	0.447363	0.524627	0.620117	0.723175	0.810771	0.940575	1.06037	1.2319	1.33577	1.51192	1.70674	1.93731	2.23458	2.58969	3.22461	4.71941	7.98773	16.5207	42.4588
0.10756	0.222316	0.265582	0.354328	0.447893	0.525627	0.620117	0.723175	0.811058	0.940843	1.06135	1.2319	1.33577	1.51312	1.70697	1.93731	2.23586	2.58969	3.22699	4.71941	7.98773	16.5226	42.7512
0.107714	0.222501	0.265764	0.354668	0.448114	0.526187	0.620117	0.723175	0.811207	0.940943	1.06156	1.23293	1.33577	1.5139	1.70719	1.93731	2.23586	2.58969	3.23094	4.73893	8.03381	16.5468	42.9128
0.107742	0.222524	0.2662	0.355007	0.448234	0.526187	0.620117	0.723175	0.81219	0.941443	1.06233	1.2335	1.33577	1.5139	1.70738	1.93731	2.23626	2.58969	3.23414	4.73893	8.05794	16.6395	43.4082
0.107775	0.223005	0.266275	0.355492	0.448388	0.526187	0.620117	0.723175	0.812851	0.941737	1.0625	1.23379	1.33577	1.5139	1.70742	1.93731	2.23833	2.58969	3.23414	4.73893	8.07582	16.6856	43.467
0.107861	0.223325	0.266469	0.355579	0.448723	0.526187	0.620117	0.723175	0.813614	0.942047	1.06256	1.23431	1.33577	1.5139	1.70797	1.93731	2.24573	2.58969	3.23414	4.73893	8.07963	16.7225	43.7154
0.107873	0.223524	0.266624	0.35559	0.449093	0.526187	0.620117	0.723175	0.815541	0.942509	1.06332	1.23475	1.33577	1.5139	1.70856	1.93731	2.24616	2.58969	3.23414	4.76035	8.09865	16.7739	43.851
0.107909	0.223905	0.266695	0.355712	0.449457	0.526187	0.620117	0.723175	0.815625	0.943103	1.06371	1.2356	1.33577	1.51405	1.7091	1.93731	2.24616	2.58969	3.23414	4.76482	8.11003	16.869	43.905
0.107974	0.224406	0.266794	0.355881	0.449737	0.526187	0.620117	0.723175	0.8157	0.943407	1.06386	1.23566	1.33577	1.51405	1.70975	1.93731	2.24616	2.58969	3.23414	4.76482	8.12519	16.9291	44.753
0.10829	0.224454	0.267043	0.356316	0.449963	0.526187	0.620117	0.723175	0.816947	0.943731	1.06493	1.23568	1.33577	1.51405	1.71042	1.93731	2.24616	2.58969	3.23414	4.76482	8.18555	16.9926	45.1997
0.108379	0.224689	0.267081	0.356316	0.450029	0.526187	0.620117	0.723175	0.816979	0.944083	1.06535	1.23645	1.33577	1.51405	1.7106	1.93731	2.24616	2.58969	3.23672	4.77128	8.1893	17.0016	45.3648
0.108531	0.224855	0.267174	0.356316	0.450052	0.52709	0.620117	0.723366	0.817374	0.944334	1.06626	1.23709	1.33577	1.51411	1.71295	1.93731	2.24616	2.58969	3.24783	4.77128	8.24546	17.0143	45.782
0.108703	0.225191	0.267276	0.356316	0.450342	0.52713	0.620117	0.724881	0.817506	0.944534	1.0663	1.23763	1.33577	1.51421	1.71301	1.93731	2.24616	2.58969	3.26255	4.78642	8.24546	17.0648	46.1234
0.108787	0.225423	0.267382	0.356316	0.45072	0.527264	0.620117	0.725099	0.817655	0.945004	1.06677	1.23784	1.33577	1.51437	1.71403	1.93731	2.24616	2.58969	3.26255	4.8162	8.24546	17.1224	46.2433
0.108795	0.225486	0.267575	0.356316	0.450739	0.527376	0.620117	0.725195	0.817788	0.945264	1.06689	1.23844	1.33577	1.51542	1.71553	1.93731	2.24616	2.58969	3.26255	4.84476	8.24546	17.1224	46.4385
0.108933	0.225688	0.267682	0.356316	0.451272	0.527532	0.620117	0.725226	0.817916	0.945307	1.06689	1.2387	1.33577	1.51571	1.71666	1.93731	2.24616	2.58969	3.26255	4.8485	8.25665	17.3083	46.8336
0.108966	0.225833	0.26787	0.356316	0.451861	0.527699	0.620117	0.725817	0.818042	0.945923	1.06689	1.23927	1.33577	1.51677	1.71668	1.93731	2.24616	2.58969	3.26615	4.88596	8.31605	17.4164	46.951
0.109068	0.225852	0.268277	0.357029	0.45214	0.527819	0.620117	0.726315	0.818677	0.946061	1.06689	1.24001	1.33577	1.51733	1.71678	1.93731	2.2496	2.58969	3.27261	4.88596	8.31975	17.4898	47.6779
0.109444	0.226219	0.268765	0.357097	0.45227	0.527953	0.620117	0.726472	0.819076	0.946675	1.06689	1.24005	1.33577	1.51936	1.71887	1.93731	2.24979	2.58969	3.27267	4.88596	8.31975	17.5132	47.8859
0.109459	0.226367	0.26885	0.357638	0.45227	0.528309	0.620117	0.726506	0.819158	0.946922	1.06689	1.24023	1.33577	1.5203	1.71983	1.93731	2.2519	2.58969	3.30201	4.89225	8.31975	17.514	48.1441
0.109574	0.226648	0.269213	0.35767	0.45227	0.528816	0.620117	0.726595	0.819933	0.947174	1.06689	1.24023	1.33577	1.52052	1.72143	1.93731	2.25321	2.59095	3.30608	4.89225	8.36768	17.5247	48.5678
0.10959	0.226833	0.269607	0.358243	0.45227	0.529646	0.620117	0.726796	0.82106	0.948412	1.06689	1.24023	1.33872	1.52086	1.72322	1.93731	2.25351	2.59472	3.308	4.91108	8.39525	17.5273	49.1415
0.109617	0.226904	0.269773	0.358469	0.45227	0.529985	0.620117	0.727001	0.821261	0.948682	1.0672	1.24023	1.33932	1.52102	1.72411	1.93731	2.255	2.59682	3.30915	4.9423	8.4263	17.5534	50.6192
0.109697	0.227096	0.270063	0.358806	0.45227	0.530819	0.620117	0.72719	0.821972	0.949162	1.06732	1.24023	1.34015	1.52135	1.72429	1.93731	2.25559	2.60522	3.30936	4.96094	8.43359	17.5711	51.5938
0.109699	0.227231	0.270446	0.359018	0.45227	0.530865	0.620117	0.727251	0.821972	0.951472	1.06735	1.24023	1.34018	1.52146	1.72455	1.93731	2.25626	2.60673	3.30936	4.96713	8.43359	17.615	51.6712
0.109788	0.227284	0.270842	0.359042	0.45227	0.530895	0.620117	0.727675	0.821972	0.951599	1.06785	1.24023	1.34152	1.52241	1.72597	1.93731	2.25819	2.6085	3.30936	4.96713	8.43724	17.6828	52.8782
0.109798	0.227426	0.271191	0.359105	0.45227	0.531164	0.620117	0.728228	0.821972	0.951741	1.06793	1.24023	1.34152	1.52313	1.72638	1.93731	2.2597	2.61127	3.30936	4.96713	8.46636	17.6967	53.496
0.109824	0.227454	0.271251	0.359537	0.45227	0.531164	0.620117	0.729072	0.821972	0.951948	1.06802	1.24023	1.34152	1.52362	1.72745	1.93731	2.2604	2.61127	3.30936	4.96713	8.5243	17.7228	54.4574
0.109826	0.227454	0.271534	0.359595	0.45227	0.531164	0.620117	0.730251	0.821972	0.952499	1.0685	1.24023	1.3424	1.524	1.72745	1.93875	2.26135	2.61841	3.31306	4.9783	8.54233	17.7505	55.43
0.109932	0.227546	0.271563	0.35962	0.45227	0.531408	0.620117	0.730259	0.822694	0.953521	1.06881	1.24023	1.34442	1.52473	1.72764	1.9394	2.26337	2.62705	3.31319	4.98568	8.59618	17.7852	56.0855
0.109965	0.227579	0.271751	0.360052	0.452372	0.531414	0.620117	0.730304	0.822831	0.954619	1.06883	1.24023	1.34489	1.52667	1.72792	1.93966	2.26486	2.62801	3.3279	4.99185	8.62832	17.8171	56.5639
0.110082	0.227617	0.271939	0.360075	0.452787	0.531709	0.620117	0.73031	0.823188	0.955107	1.06895	1.24023	1.34505	1.52732	1.72872	1.94105	2.26515	2.62801	3.3279	5.01644	8.6639	17.868	57.006
0.110186	0.22784	0.272411	0.360472	0.453319	0.532632	0.620117	0.731812	0.824279	0.957134	1.06912	1.24023	1.34582	1.52768	1.72961	1.94127	2.26541	2.62801	3.3279	5.02257	8.6639	17.9024	57.3981
0.110203	0.227974	0.272802	0.360888	0.453394	0.532633	0.620117	0.732187	0.824616	0.957473	1.06952	1.24023	1.34583	1.52794	1.73016	1.94482	2.26595	2.63047	3.32801	5.02257	8.69521	17.9213	57.4281
0.110265	0.227974	0.272847	0.360891	0.453556	0.532955	0.620117	0.732383	0.824977	0.957535	1.06959	1.24023	1.34829	1.52801	1.73138	1.94532	2.26889	2.63385	3.32847	5.02257	8.77679	17.9924	57.8183
0.110391	0.227974	0.273229	0.361027	0.453808	0.53314	0.620117	0.732444	0.825385	0.957569	1.07068	1.24023	1.34835	1.52845	1.73144	1.9458	2.27057	2.63393	3.33713	5.05918	8.77679	18.0581	57.8588
0.110421	0.227974	0.273447	0.361582	0.453939	0.533392	0.620117	0.733305	0.82583	0.957569	1.07114	1.24023	1.34966	1.52914	1.73301	1.94907	2.27097	2.63587	3.33713	5.1076	8.85357	18.096	58.0562
0.110443	0.227974	0.273861	0.361802	0.454032	0.533602	0.620117	0.733317	0.825926	0.957569	1.07364	1.24023	1.34984	1.5293	1.73396	1.9495	2.27126	2.63677	3.33713	5.1076	8.85357	18.1091	58.7091
0.110589	0.227974	0.274185	0.361909	0.454225	0.533916	0.620157	0.73349	0.82631	0.957569	1.07432	1.24023	1.35126	1.52936	1.7347	1.95052	2.27223	2.63677	3.33713	5.11362	8.86399	18.1498	58.808
0.110654	0.227974	0.274246	0.361995	0.454451	0.534616	0.620157	0.733869	0.826376	0.95771	1.07438	1.24023	1.35162	1.5296	1.73558	1.95057	2.27228	2.63677	3.33943	5.17937	8.92969	18.1562	61.5701
0.11066	0.227974	0.274625	0.362211	0.454504	0.534885	0.620157	0.733909	0.827113	0.957951	1.07526	1.24023	1.35393	1.53019	1.73626	1.95134	2.27483	2.63677	3.34863	5.17937	8.94346	18.1939	65.2557
0.110736	0.227974	0.27469	0.362393	0.454586	0.534908	0.620157	0.734023	0.82715	0.958434	1.07574	1.24023	1.35446	1.53148	1.73633	1.95151	2.2775	2.63677	3.36049	5.2044	8.9469	18.2091
0.1109	0.227974	0.275016	0.362665	0.454613	0.534978	0.620157	0.735194	0.82715	0.959265	1.0764	1.24023	1.35561	1.53177	1.73633	1.9525	2.27955	2.64027	3.36467	5.20898	8.9469	18.2411
0.110967	0.227974	0.275425	0.362665	0.454816	0.53543	0.620157	0.735194	0.82715	0.959383	1.07648	1.24023	1.35618	1.53257	1.73633	1.9529	2.28014	2.65299	3.3738	5.21489	8.9469	18.3018
0.111001	0.227974	0.275819	0.363497	0.455446	0.535534	0.620157	0.735194	0.82715	0.960806	1.0765	1.24023	1.35693	1.53273	1.73633	1.95453	2.28193	2.65422	3.3738	5.23255	9.0154	18.3504
0.111042	0.227974	0.276313	0.363928	0.455837	0.536057	0.620197	0.735194	0.82715	0.960921	1.0769	1.24023	1.35856	1.53297	1.73633	1.95502	2.28267	2.65444	3.3738	5.23255	9.02904	18.4045
0.111051	0.227974	0.276618	0.363934	0.455948	0.536184	0.620759	0.735194	0.827733	0.961824	1.07881	1.24023	1.35877	1.53409	1.73633	1.95592	2.2827	2.65781	3.3738	5.25602	9.02904	18.4157
0.111069	0.227974	0.27663	0.363994	0.455948	0.5363	0.621541	0.735194	0.829116	0.961824	1.07947	1.24023	1.35921	1.53444	1.73633	1.95617	2.28409	2.65872	3.3738	5.25602	9.05286	18.4374
0.111134	0.227974	0.277168	0.364047	0.455948	0.536446	0.621708	0.738363	0.829186	0.961824	1.08022	1.24023	1.36001	1.53505	1.73633	1.95621	2.28688	2.65942	3.3738	5.25602	9.10031	18.4374
0.111385	0.227974	0.277243	0.364125	0.455948	0.537144	0.622209	0.738665	0.829572	0.961824	1.0811	1.24023	1.36064	1.53677	1.73633	1.95668	2.28688	2.66366	3.37912	5.26187	9.1704	18.572
0.11143	0.227974	0.277325	0.364685	0.455948	0.537337	0.622726	0.73908	0.830078	0.961824	1.08127	1.24023	1.36158	1.53877	1.73633	1.95846	2.28688	2.66487	3.38086	5.26187	9.17773	18.5873
0.111497	0.227974	0.277325	0.364686	0.455948	0.537413	0.623206	0.739548	0.830429	0.962857	1.08172	1.24023	1.36178	1.54037	1.73633	1.95846	2.28688	2.66672	3.38876	5.28709	9.17773	18.5895
0.111567	0.227974	0.277325	0.36469	0.455948	0.537762	0.623227	0.740354	0.831098	0.963169	1.08213	1.24023	1.36199	1.54139	1.73727	1.95943	2.28688	2.6679	3.39708	5.30264	9.21787	18.591
0.111727	0.227974	0.277325	0.365056	0.455948	0.537762	0.623448	0.740504	0.831403	0.964939	1.08321	1.24023	1.36406	1.54175	1.73811	1.96075	2.28688	2.67155	3.39973	5.30264	9.26115	18.627
0.111857	0.227974	0.277325	0.365574	0.455948	0.537762	0.623482	0.740812	0.831474	0.965593	1.08334	1.24023	1.3641	1.54207	1.73824	1.96098	2.28688	2.67155	3.40557	5.30843	9.26115	18.63
0.111948	0.227974	0.277325	0.365584	0.455948	0.537762	0.624078	0.74223	0.831576	0.965661	1.08345	1.24023	1.36426	1.54217	1.73927	1.96098	2.28688	2.67155	3.40629	5.32579	9.31085	18.6366
0.111953	0.227974	0.277325	0.365727	0.455948	0.537762	0.624089	0.74223	0.831975	0.966457	1.08378	1.24023	1.36426	1.54332	1.73931	1.96098	2.28688	2.67155	3.41953	5.33419	9.32406	18.6415
0.111995	0.227974	0.277325	0.36609	0.455948	0.537762	0.62416	0.74223	0.831975	0.966699	1.08378	1.24023	1.36508	1.54403	1.74072	1.96098	2.28688	2.67155	3.4223	5.34309	9.35041	18.6564
0.112031	0.227974	0.277325	0.366684	0.455948	0.537991	0.62425	0.74223	0.831975	0.967212	1.08433	1.24023	1.36663	1.5441	1.74075	1.96098	2.28688	2.67155	3.4236	5.3546	9.3767	18.6726
0.112094	0.227974	0.277325	0.366753	0.456166	0.538627	0.624297	0.74223	0.831975	0.967212	1.085	1.24023	1.36673	1.54446	1.74216	1.96271	2.28688	2.67155	3.43882	5.44009	9.38981	18.6808
0.112413	0.227974	0.277325	0.366995	0.457084	0.53865	0.624568	0.742646	0.831975	0.967212	1.08528	1.24023	1.36717	1.54487	1.74218	1.96486	2.28688	2.67155	3.44598	5.44009	9.42904	18.7107
0.112427	0.227974	0.277325	0.367597	0.457533	0.538988	0.624575	0.743354	0.831975	0.967294	1.08579	1.24023	1.36781	1.54524	1.74373	1.96527	2.28688	2.67155	3.45218	5.44009	9.42904	18.7682
0.112654	0.227974	0.277325	0.367597	0.457684	0.539423	0.624962	0.744141	0.832768	0.967617	1.0868	1.24023	1.36784	1.54579	1.74516	1.9654	2.28688	2.67155	3.45416	5.44009	9.42904	18.7682
0.112793	0.227974	0.277325	0.367597	0.457976	0.539677	0.625952	0.744141	0.833683	0.967754	1.08765	1.24023	1.36784	1.54633	1.74516	1.96681	2.28688	2.67155	3.45489	5.44009	9.44534	18.8214
0.112881	0.227974	0.277325	0.367597	0.458167	0.539757	0.62604	0.744141	0.833686	0.967773	1.0903	1.24023	1.36808	1.54647	1.74545	1.96976	2.28688	2.67155	3.45489	5.44009	9.50703	18.8809
0.112908	0.227974	0.277325	0.367597	0.458969	0.541126	0.626093	0.744141	0.834189	0.96802	1.09067	1.24023	1.36809	1.5469	1.74565	1.97053	2.28688	2.67155	3.45489	5.46267	9.54578	18.8922
0.112938	0.227974	0.277325	0.367597	0.459362	0.541217	0.626891	0.744141	0.834202	0.968217	1.09085	1.24023	1.36865	1.54705	1.74567	1.97172	2.28688	2.67155	3.45489	5.47452	9.6611	18.92
0.113018	0.227974	0.277325	0.367597	0.459428	0.542595	0.627107	0.744141	0.835585	0.968562	1.0916	1.24023	1.36967	1.54741	1.7476	1.974	2.28688	2.67155	3.45489	5.47953	9.67383	18.9508
0.113112	0.227974	0.277325	0.367597	0.459578	0.542615	0.627118	0.744141	0.835634	0.968654	1.0918	1.24023	1.36986	1.5486	1.7476	1.97526	2.28688	2.67155	3.45489	5.49075	9.68654	18.9665
0.113177	0.227974	0.277325	0.367597	0.459984	0.542926	0.627588	0.744141	0.835657	0.968654	1.0918	1.24023	1.37009	1.5486	1.7476	1.97782	2.28688	2.67155	3.45489	5.50753	9.68654	18.9909
0.11318	0.227974	0.277325	0.367597	0.46019	0.543069	0.627696	0.744141	0.836019	0.968654	1.09201	1.24023	1.37014	1.5486	1.7476	1.97848	2.28842	2.67155	3.45489	5.50753	9.70241	19.0027
0.113183	0.227974	0.277325	0.367597	0.460368	0.54319	0.627739	0.744141	0.836183	0.968654	1.09226	1.24023	1.3703	1.54952	1.74829	1.97979	2.28914	2.67155	3.45489	5.5465	9.72458	19.0032
0.113195	0.227974	0.277325	0.367597	0.460404	0.54359	0.627985	0.744141	0.837086	0.968654	1.09362	1.24023	1.37091	1.55115	1.74858	1.9808	2.29102	2.67236	3.45666	5.57416	9.77506	19.0208
0.113245	0.227974	0.277325	0.367597	0.46052	0.544316	0.627989	0.744141	0.837315	0.968654	1.09372	1.24023	1.37164	1.55289	1.74865	1.98126	2.29111	2.6732	3.47266	5.57416	9.81275	19.0238
0.113273	0.227974	0.277325	0.367597	0.460713	0.545639	0.628041	0.744141	0.838473	0.968654	1.09439	1.24023	1.37164	1.55333	1.74954	1.98128	2.29119	2.67728	3.47266	5.57416	9.87837	19.0443
0.113436	0.227974	0.277325	0.367597	0.460928	0.545742	0.628223	0.744141	0.838924	0.96875	1.0944	1.24023	1.37164	1.55383	1.75014	1.9821	2.29367	2.67807	3.47266	5.57416	9.8846	19.0609
0.113438	0.227974	0.277325	0.367597	0.461333	0.54611	0.629127	0.744141	0.839241	0.968925	1.09452	1.24023	1.37197	1.55401	1.75365	1.98287	2.29592	2.67825	3.47266	5.59619	9.89967	19.0996
0.113758	0.227974	0.277325	0.367597	0.461515	0.546505	0.629209	0.744141	0.839382	0.968997	1.09476	1.24023	1.37215	1.55401	1.75374	1.98438	2.2969	2.68176	3.47266	5.62361	9.92498	19.204
0.113829	0.227974	0.277325	0.367597	0.461717	0.546522	0.62928	0.744141	0.839581	0.97041	1.09477	1.24023	1.37258	1.5558	1.75389	1.98438	2.29692	2.68304	3.47266	5.62361	9.93427	19.2536
0.113952	0.227974	0.277325	0.367597	0.461905	0.546683	0.630486	0.744141	0.839771	0.970426	1.09502	1.24023	1.37284	1.55633	1.75396	1.98438	2.29755	2.68304	3.47266	5.65634	9.94974	19.2648
0.11397	0.227974	0.277325	0.367597	0.462189	0.547175	0.630634	0.744141	0.839844	0.970874	1.09502	1.24023	1.37368	1.55759	1.75396	1.98438	2.2978	2.68304	3.47266	5.66392	9.97136	19.2967
0.114263	0.227982	0.277325	0.367749	0.462282	0.547932	0.630793	0.744141	0.839844	0.971189	1.09502	1.24023	1.37453	1.558	1.75396	1.98438	2.2995	2.68304	3.47266	5.66721	9.98678	19.4048
0.11428	0.228022	0.277325	0.368026	0.462434	0.548365	0.63103	0.744141	0.840338	0.9715	1.09598	1.24023	1.37481	1.55841	1.75396	1.98438	2.30134	2.68304	3.47266	5.69935	9.99909	19.4064
0.114351	0.228309	0.277325	0.368172	0.464257	0.548694	0.631088	0.744141	0.840657	0.971783	1.09813	1.24023	1.37493	1.5622	1.75396	1.98438	2.30302	2.68304	3.47619	5.70508	9.99909	19.4207
0.114389	0.228452	0.277325	0.368531	0.464315	0.548826	0.631136	0.744141	0.840836	0.972962	1.09831	1.24023	1.37595	1.5622	1.75396	1.98438	2.30415	2.68304	3.47972	5.70508	9.99909	19.6944
0.114404	0.228607	0.277325	0.368567	0.464364	0.549034	0.631247	0.744141	0.84113	0.973539	1.09832	1.24023	1.37676	1.5622	1.75396	1.98438	2.30436	2.68304	3.48022	5.76942	9.99909	19.7474
0.114538	0.228857	0.277325	0.368945	0.464372	0.549034	0.631362	0.744141	0.842676	0.974345	1.09849	1.24023	1.37678	1.5622	1.75396	1.98438	2.30522	2.68304	3.48071	5.80663	10.1699	19.8995
0.114595	0.228962	0.277325	0.36901	0.464497	0.549034	0.631693	0.744141	0.842978	0.974806	1.09865	1.24023	1.3773	1.5622	1.75396	1.98438	2.3059	2.68304	3.4815	5.80663	10.1699	20.0979
0.114813	0.229214	0.277325	0.369193	0.465475	0.549034	0.63176	0.744141	0.843275	0.975831	1.10032	1.24023	1.37731	1.56243	1.75396	1.98438	2.30633	2.69073	3.4815	5.80663	10.2453	20.1468
0.115115	0.229259	0.277325	0.369407	0.465682	0.549034	0.632398	0.744141	0.843676	0.975908	1.10118	1.24023	1.37742	1.56248	1.75396	1.98438	2.30664	2.69164	3.4815	5.80663	10.2453	20.2443
0.115131	0.229303	0.277325	0.369523	0.465767	0.549034	0.632398	0.744141	0.843755	0.976154	1.10143	1.24023	1.37745	1.56268	1.75396	1.98438	2.30697	2.69644	3.4815	5.81192	10.2693	20.2671
0.115139	0.229587	0.277325	0.369606	0.465886	0.549034	0.632398	0.744141	0.844033	0.976335	1.10145	1.24023	1.37988	1.5627	1.75396	1.98438	2.30757	2.69765	3.4845	5.85412	10.418	20.364
0.115189	0.230017	0.277325	0.370242	0.466029	0.549034	0.632398	0.744141	0.844033	0.976425	1.10216	1.24023	1.3813	1.5635	1.75396	1.98592	2.30892	2.70936	3.48577	5.96345	10.4651	20.364
0.115221	0.230189	0.277325	0.370337	0.466131	0.549034	0.632398	0.744141	0.844033	0.976467	1.10261	1.24023	1.38155	1.56413	1.75396	1.98665	2.31281	2.72005	3.48701	5.96345	10.6545	20.4905
0.115439	0.231162	0.277325	0.370954	0.46649	0.549034	0.632398	0.744141	0.8445	0.976636	1.10279	1.24023	1.38491	1.56446	1.75396	1.98825	2.31504	2.72287	3.50141	5.97376	10.6775	20.5894
0.115569	0.231331	0.277325	0.371016	0.466675	0.549034	0.632398	0.744141	0.84454	0.97691	1.10279	1.24023	1.38492	1.56535	1.75396	1.98825	2.31695	2.72287	3.50791	5.99432	10.6862	20.6416
0.115713	0.231454	0.277325	0.371461	0.467085	0.549464	0.632398	0.744141	0.844832	0.977328	1.10294	1.24023	1.38511	1.5657	1.75396	1.98825	2.31695	2.72609	3.50791	5.99432	10.735	20.6416
0.11613	0.231688	0.277325	0.37163	0.467278	0.550846	0.632398	0.744141	0.845738	0.977329	1.10326	1.24023	1.38572	1.56574	1.75396	1.9888	2.31695	2.72852	3.50791	5.99432	10.7465	20.8197
0.11616	0.231756	0.277325	0.37184	0.467297	0.551115	0.632398	0.744141	0.845869	0.977656	1.10429	1.24023	1.38594	1.56648	1.75396	1.99168	2.31695	2.72852	3.50791	5.99945	10.7693	20.8728
0.116303	0.232066	0.277325	0.37197	0.467303	0.551353	0.632398	0.744141	0.846779	0.977696	1.10433	1.24023	1.38662	1.56692	1.75396	1.99186	2.31779	2.72852	3.50791	6.00458	10.7693	20.9082
0.116537	0.232088	0.277325	0.37207	0.467454	0.551456	0.632398	0.744141	0.847181	0.977773	1.1054	1.24023	1.38662	1.56727	1.75396	1.99253	2.31922	2.72852	3.50791	6.03524	10.8717	20.9801
0.11656	0.232287	0.277325	0.37207	0.467643	0.551687	0.632398	0.744141	0.847442	0.979014	1.10581	1.24023	1.38662	1.56749	1.75396	1.99334	2.32172	2.72852	3.50791	6.03524	10.8802	21.1772
0.116576	0.232529	0.277325	0.37207	0.46778	0.551986	0.632398	0.744141	0.847509	0.979418	1.10586	1.24023	1.38662	1.56809	1.75396	1.994	2.32338	2.73076	3.50931	6.04034	10.8802	21.3291
0.116579	0.23265	0.277325	0.37207	0.46785	0.552066	0.632398	0.744141	0.84755	0.979681	1.10637	1.24023	1.38662	1.56814	1.75396	1.99541	2.32534	2.73133	3.51134	6.04034	10.8971	21.3378
0.116692	0.232703	0.277325	0.37207	0.468196	0.553238	0.632398	0.744141	0.847573	0.979949	1.10672	1.24023	1.38662	1.56879	1.75396	1.99591	2.32554	2.73133	3.51595	6.04034	10.9141	21.3839
0.116734	0.23278	0.277325	0.37207	0.468351	0.553545	0.632398	0.744141	0.847647	0.980672	1.10727	1.24023	1.38662	1.56879	1.75396	1.99629	2.32618	2.73133	3.52127	6.08094	10.9591	21.4772
0.116777	0.232838	0.277325	0.37207	0.468835	0.553661	0.632398	0.744141	0.848746	0.980929	1.1076	1.24023	1.38662	1.56879	1.75396	1.99685	2.32669	2.73379	3.52963	6.12631	11.0497	21.7278
0.116809	0.23291	0.277325	0.37207	0.4693	0.553728	0.632398	0.744141	0.848783	0.980942	1.10799	1.24023	1.38662	1.56879	1.75396	1.99685	2.33019	2.73977	3.53036	6.14116	11.0763	21.8338
0.116816	0.232948	0.277325	0.37207	0.46932	0.55438	0.632398	0.744141	0.849835	0.981011	1.1093	1.24023	1.38671	1.56879	1.75396	1.99935	2.33524	2.73977	3.53134	6.16136	11.14	21.8338
0.116916	0.232971	0.277325	0.37207	0.469628	0.554522	0.632398	0.744141	0.850354	0.981183	1.1093	1.24023	1.38807	1.56879	1.75396	1.99972	2.34007	2.73977	3.54047	6.16136	11.3371	21.8338
0.117017	0.232978	0.277325	0.37207	0.469732	0.55465	0.632398	0.744141	0.850572	0.981226	1.1093	1.24023	1.38865	1.56879	1.75396	1.99977	2.34007	2.73977	3.55149	6.20117	11.3615	21.9868
0.117098	0.233412	0.277325	0.37207	0.470059	0.55465	0.632398	0.744141	0.850878	0.981339	1.1093	1.24023	1.38888	1.56879	1.75396	1.99982	2.34007	2.73977	3.55149	6.20613	11.4129	22.0357
0.117169	0.233555	0.277325	0.37207	0.470234	0.55465	0.632398	0.744141	0.851322	0.982965	1.1093	1.24023	1.39003	1.56879	1.75396	1.99982	2.34007	2.73977	3.55149	6.22098	11.4263	22.0985
0.117201	0.233647	0.277325	0.37207	0.470531	0.55465	0.632398	0.744141	0.851927	0.983386	1.1093	1.24023	1.39071	1.56879	1.75396	1.99982	2.34007	2.75105	3.55149	6.22098	11.4344	22.1026
0.117263	0.233744	0.277325	0.37207	0.47105	0.55465	0.632398	0.744141	0.852198	0.983526	1.1093	1.24031	1.39128	1.56879	1.75396	1.99982	2.34007	2.75377	3.55149	6.27514	11.4667	22.1443
0.117341	0.23384	0.277325	0.37207	0.471395	0.55465	0.632398	0.744141	0.85225	0.983961	1.1093	1.24062	1.3927	1.56879	1.75396	1.99982	2.34007	2.76283	3.55149	6.28005	11.4774	22.2856
0.117518	0.233966	0.277325	0.37207	0.471406	0.55465	0.632398	0.744141	0.852672	0.98426	1.1093	1.24079	1.39318	1.56879	1.75396	1.99982	2.34007	2.77325	3.55149	6.31424	11.5415	22.2966
0.117606	0.23419	0.277325	0.37207	0.471489	0.55465	0.632398	0.744141	0.852693	0.984378	1.1093	1.24092	1.39462	1.56879	1.75396	1.99982	2.34007	2.77325	3.55149	6.32398	11.5708	22.3215
0.11761	0.234282	0.277325	0.37207	0.471505	0.55465	0.632398	0.744141	0.853917	0.98458	1.1093	1.24103	1.39512	1.56879	1.75396	1.99982	2.34007	2.77325	3.55149	6.32398	11.5974	22.3297
0.117629	0.234584	0.277325	0.37207	0.471962	0.55465	0.632398	0.744141	0.854231	0.984635	1.1093	1.24183	1.39544	1.56879	1.75396	1.99982	2.34007	2.77325	3.55366	6.35794	11.7003	22.3586
0.11768	0.234949	0.277325	0.37207	0.472066	0.55465	0.632398	0.744141	0.854362	0.985619	1.1093	1.24194	1.39636	1.56879	1.75396	1.99982	2.34007	2.77325	3.56221	6.37727	11.724	22.3738
0.117705	0.234997	0.277325	0.37207	0.472418	0.55465	0.632398	0.744141	0.854459	0.985988	1.1093	1.24216	1.39646	1.56879	1.75396	1.99982	2.34007	2.77325	3.57093	6.43489	11.7528	22.4753
0.117883	0.235066	0.277325	0.37207	0.472882	0.55465	0.632398	0.744141	0.85479	0.986443	1.1093	1.24342	1.39778	1.56879	1.75396	1.99982	2.34007	2.77325	3.59328	6.43489	11.87	22.5231
0.11789	0.235073	0.277325	0.37207	0.473441	0.55465	0.632398	0.744141	0.856476	0.986834	1.1093	1.2445	1.39821	1.56879	1.75396	1.99982	2.34007	2.77325	3.6069	6.44922	11.9166	22.5736
0.117992	0.235212	0.277325	0.37207	0.473564	0.55465	0.632398	0.744141	0.856508	0.987095	1.1093	1.2445	1.39877	1.56879	1.75396	1.99982	2.34007	2.77325	3.60852	6.45399	11.9707	22.6389
[truncated: 12,483 more rows]
