# Supplementary material for: Long-term intravital imaging of the multicolor-coded tumor microenvironment during combination immunotherapy
Source: eLife. 2016 Nov 18;5:e14756. doi: 10.7554/eLife.14756 (PMC5173323; doi:10.7554/eLife.14756)
Supplement: Figure 6—source data 4. — DOI: http://dx.doi.org/10.7554/eLife.14756.048 [file elife-14756-fig6-data4.xls]

## Sheet: displacement（um)
0	0	0	0	0	0	0	0	0	0	0	0	0	0	0	0	0	0.246094	0	0	1.24023	1.1093	1.02272	0.894346	0.784393	0.701583	0.55465	0.55465	0.784393	1.24023
0	0	0	0	0	0	0	0	0	0	0	0	0	0	0	0	0	0.267588	0.246094	0	1.2648	1.24023	1.05237	0.992188	0.894346	0.744141	0.744141	0.784393	1.24023	3.88968
0	0	0	0	0	0	0	0	0	0	0	0	0	0	0	0	0	0.324018	0.348029	1.1178	1.2648	1.33577	1.2648	1.1093	1.02272	1.02272	1.02272	1.48828	3.46265	4.47173
0	0	0	0	0	0	0	0	0	0	0	0	0	0	0	0	0.246094	0.348029	0.350791	1.23047	1.2648	1.33577	1.44635	1.33577	1.33577	1.2648	1.73633	3.08145	4.03105	4.47173
0	0	0	0	0	0	0	0	0	0	0	0	0	0	0	0	0.246094	0.368382	0.356557	1.23047	1.2648	1.48828	1.50881	1.44635	1.50881	1.98438	2.74959	3.23414	4.06827	5.5465
0	0	0	0	0	0	0	0	0	0	0	0	0	0	0	0	0.28826	0.431245	0.444554	1.23047	1.44635	1.50881	1.58827	1.98438	2.39691	2.50478	3.19959	3.52541	4.2095	5.5465
0	0	0	0	0	0	0	0	0	0	0	0	0	0	0	0	0.298088	0.492188	0.492188	1.23047	1.50881	1.58827	1.73633	2.23242	2.49284	2.84744	3.22461	3.59731	4.47173	5.64788
0	0	0	0	0	0	0	0	0	0	0	0	0	0	0	0	0.327409	0.492188	0.550282	1.23047	1.56879	1.75396	2.03921	2.26135	2.5538	2.8927	3.33713	3.87462	4.61394	5.6626
0	0	0	0	0	0	0	0	0	0	0	0	0	0	0	0	0.348029	0.492188	0.589272	1.23047	1.66395	1.80581	2.10475	2.43871	2.57843	3.01762	3.33713	3.92197	4.68014	5.98222
0	0	0	0	0	0	0	0	0	0	0	0	0	0	0	0.110138	0.353285	0.492188	0.696058	1.23047	1.66395	1.85009	2.11931	2.48047	2.67155	3.13757	3.52541	3.99964	4.92359	6.20117
0	0	0	0	0	0	0	0	0	0	0	0	0	0	0	0.120017	0.353785	0.513776	0.696058	1.23047	1.72164	1.93731	2.24616	2.49284	2.72852	3.15712	3.65988	4.10224	5.20404	6.67887
0	0	0	0	0	0	0	0	0	0	0	0	0	0	0	0.156277	0.360704	0.550282	0.738281	1.23047	1.75396	1.93731	2.2839	2.52959	2.86337	3.17655	3.68748	4.22409	5.20898	7.01583
0	0	0	0	0	0	0	0	0	0	0	0	0	0	0	0.199454	0.387203	0.622683	0.738281	1.23047	1.78869	1.98438	2.28688	2.56595	2.8927	3.22461	3.7207	4.46484	5.32219	7.01583
0	0	0	0	0	0	0	0	0	0	0	0	0	0	0	0.205215	0.426327	0.645496	0.738281	1.23047	1.80581	1.99982	2.38974	2.63677	2.98688	3.24052	3.77814	4.47173	5.32579	7.0732
0	0	0	0	0	0	0	0	0	0	0	0	0	0	0	0.246094	0.437267	0.696058	0.778217	1.24023	1.84948	2.05156	2.48047	2.67155	3.22461	3.33713	3.79439	4.61394	5.38467	7.23175
0	0	0	0	0	0	0	0	0	0	0	0	0	0	0	0.246094	0.492188	0.738281	0.778217	1.24023	1.93731	2.21453	2.49284	2.67155	3.22461	3.50791	3.87462	4.68014	5.41569	7.84393
0	0	0	0	0	0	0	0	0	0	0	0	0	0	0	0.246094	0.492188	0.738281	0.838408	1.24023	1.97327	2.23242	2.49284	2.73977	3.23414	3.68748	4.15802	4.70636	5.5465	7.84393
0	0	0	0	0	0	0	0	0	0	0	0	0	0	0	0.246094	0.492188	0.738281	0.887304	1.2648	1.98438	2.28688	2.52959	2.8927	3.23414	3.68748	4.20675	4.76482	5.5465	7.84393
0	0	0	0	0	0	0	0	0	0	0	0	0.0485551	0	0.0567732	0.246094	0.492188	0.738281	0.887304	1.2648	1.99982	2.34007	2.61623	2.93309	3.32649	3.72896	4.22409	4.79913	5.57416	7.94137
0	0	0	0	0	0	0	0	0	0	0	0	0.0558162	0	0.0693943	0.246094	0.492188	0.738281	0.887304	1.33577	2.2186	2.41277	2.67155	2.99716	3.3279	3.75947	4.26756	4.7992	5.60257	7.94137
0	0	0	0	0	0	0	0	0	0	0	0	0.0772931	0	0.0913473	0.246094	0.492188	0.738281	0.952343	1.33577	2.22209	2.49284	2.77325	3.01762	3.33713	3.77814	4.34052	5.03656	5.91296	8.06584
0	0	0	0	0	0	0	0	0	0	0	0	0.0778217	0.0230022	0.0949081	0.246094	0.492188	0.738281	0.984375	1.33577	2.23242	2.49284	2.77325	3.17655	3.33713	3.87462	4.43054	5.06362	6.20613	8.31975
0	0	0	0	0	0	0	0	0	0	0	0	0.0878783	0.0274207	0.120751	0.246094	0.492188	0.738281	0.984375	1.44635	2.34007	2.52959	2.82817	3.26255	3.50791	3.92197	4.47173	5.1076	6.67426	8.94346
0	0	0	0	0	0	0	0	0	0	0	0	0.0950082	0.0376823	0.149926	0.246094	0.500066	0.738281	0.984375	1.56879	2.35318	2.68304	2.8927	3.33713	3.70192	3.97649	4.68014	5.11676	6.67426	9.44534
0	0	0	0	0	0	0	0	0	0	0	0	0.115301	0.0410219	0.232136	0.246094	0.550282	0.778217	0.984375	1.56879	2.46985	2.69959	2.90331	3.38019	3.7207	4.02144	4.68014	5.15561	6.71013	9.76374
0	0	0	0	0	0	0	0	0	0	0	0	0.130798	0.0410219	0.246094	0.293805	0.550282	0.778217	0.997759	1.56879	2.49284	2.77325	3.0278	3.44218	3.73455	4.0868	4.73194	5.21489	6.73281	14.0317
0	0	0	0	0	0	0	0	0	0	0	0	0.155292	0.0945738	0.246094	0.340236	0.550282	0.778217	1.02272	1.63624	2.49284	2.82817	3.03423	3.44598	3.75363	4.26756	4.74542	5.31649	6.84268	16.1707
0	0	0	0	0	0	0	0	0	0	0	0	0.161849	0.141549	0.246094	0.345941	0.582115	0.778217	1.10056	1.69504	2.58969	2.82817	3.12888	3.48542	3.79439	4.27526	4.75243	5.32579	6.87855	18.8907
0	0	0	0	0	0	0	0	0	0	0	0	0.164391	0.142914	0.246094	0.348029	0.696058	0.864294	1.10056	1.73633	2.67112	2.82817	3.17655	3.50791	3.87462	4.33195	4.76906	5.47924	7.00266	34.5489
0	0	0	0	0	0	0	0	0	0	0	0	0.172521	0.192374	0.246094	0.348029	0.738281	0.887304	1.10056	1.74015	2.67155	2.89618	3.24975	3.55149	3.87462	4.33859	4.77128	5.5465	7.01583	36.0522
0	0	0	0	0	0	0	0	0	0	0	0	0.179993	0.197527	0.246094	0.348029	0.738281	0.887304	1.1093	1.74015	2.68304	2.99716	3.30936	3.64038	3.88255	4.37245	4.8162	5.5465	7.04864
0	0	0	0	0	0	0	0	0	0	0	0	0.18085	0.209017	0.246094	0.348029	0.738281	0.887304	1.23047	1.74015	2.68304	3.01762	3.32193	3.66754	3.88728	4.41635	4.8162	5.76942	7.08522
0	0	0	0	0	0	0	0	0	0	0	0	0.18598	0.246094	0.246094	0.423315	0.738281	0.887304	1.23047	1.74015	2.78036	3.02066	3.33713	3.68748	3.95795	4.44857	4.88596	5.95232	7.14185
0	0	0	0	0	0	0	0	0	0	0	0.0556609	0.196979	0.246094	0.246094	0.424376	0.738281	0.894346	1.23047	1.74015	2.80633	3.07505	3.41257	3.68748	4.02566	4.49232	4.88628	6.2159	7.17553
0	0	0	0	0	0	0	0	0	0	0	0.0678943	0.200295	0.246094	0.246094	0.486815	0.738281	0.932337	1.23047	1.74015	2.807	3.12519	3.49429	3.75363	4.06827	4.51683	4.8914	6.21605	7.36244
0	0	0	0	0	0	0	0	0	0	0	0.0747624	0.207091	0.246094	0.246094	0.492188	0.738281	0.984375	1.23047	1.75396	2.82817	3.17164	3.50791	3.79439	4.20924	4.59135	5.02526	6.22098	7.37496
0	0	0	0	0	0	0	0	0	0	0	0.0772112	0.240948	0.246094	0.246094	0.492188	0.738281	0.984375	1.23047	1.75396	2.82817	3.17655	3.54128	3.86609	4.21969	4.60276	5.1076	6.27178	7.37556
0	0	0	0	0	0	0	0	0	0	0	0.0824473	0.246094	0.246094	0.246094	0.492188	0.738281	0.984375	1.23047	1.75396	2.84666	3.17655	3.55149	3.87462	4.22534	4.62111	5.23255	6.32398	7.52373
0	0	0	0	0	0	0	0	0	0	0	0.106144	0.246094	0.246094	0.246094	0.492188	0.778217	0.984375	1.23047	1.75396	2.8927	3.22548	3.60305	3.91433	4.26756	4.68014	5.32579	6.34434	7.6614
0	0	0	0	0	0	0	0	0	0	0	0.108881	0.246094	0.246094	0.246094	0.492188	0.778217	0.984375	1.23047	1.75953	2.90331	3.30813	3.61341	3.92089	4.27669	4.77145	5.35594	6.3531	7.74923
0	0	0	0	0	0	0	0	0	0	0	0.109432	0.246094	0.246094	0.246094	0.492188	0.778217	0.984375	1.23047	1.78869	2.93707	3.31981	3.66769	3.95901	4.2979	4.80477	5.4068	6.44922	7.84827
0	0	0	0	0	0	0	0	0	0	0	0.112528	0.246094	0.246094	0.248047	0.492188	0.778217	0.984375	1.23047	1.88907	2.97212	3.33713	3.68014	3.99308	4.31487	4.89225	5.5465	6.49201	7.90281
0	0	0	0	0	0	0	0	0	0	0	0.11269	0.246094	0.246094	0.294872	0.492188	0.778217	0.984375	1.23047	1.88907	2.98688	3.33713	3.68748	3.99764	4.33195	4.94488	5.57888	6.51094	8.04911
0	0	0	0	0	0	0	0	0	0	0	0.127547	0.246094	0.246094	0.308041	0.492188	0.778217	0.984375	1.23047	1.97528	3.03261	3.33713	3.68748	3.99964	4.44646	4.96094	5.66178	6.51094	8.21181
0	0	0	0	0	0	0	0	0	0	0	0.132034	0.246094	0.246094	0.343488	0.492188	0.784393	1.01467	1.23047	1.98438	3.06344	3.36077	3.72896	4.05756	4.50724	5.02257	5.70631	6.62003	8.31605
0	0	0	0	0	0	0	0	0	0	0	0.142526	0.246094	0.246094	0.348029	0.492188	0.784393	1.01467	1.23047	2.10475	3.07289	3.36176	3.75026	4.06827	4.52643	5.1076	5.73599	6.67426	8.34253
0	0	0	0	0	0	0	0	0	0	0.0508577	0.14287	0.246094	0.246094	0.348029	0.492188	0.810943	1.01467	1.23047	2.13365	3.10802	3.3738	3.77018	4.11177	4.5345	5.17937	5.76942	6.67887	8.76627
0	0	0	0	0	0	0	0	0	0	0.0656222	0.145028	0.246094	0.246094	0.348029	0.492188	0.838249	1.01467	1.24023	2.2186	3.11487	3.40426	3.77814	4.2116	4.61394	5.21143	5.93453	6.85734	8.80828
0	0	0	0	0	0	0	0	0	0	0.0730357	0.145887	0.246094	0.246094	0.350791	0.492188	0.838945	1.02272	1.25484	2.2186	3.16059	3.46384	3.85072	4.26756	4.68014	5.23255	5.96877	6.86708	9.54578
0	0	0	0	0	0	0	0	0	0	0.096168	0.155173	0.246094	0.246094	0.351708	0.496094	0.848041	1.02272	1.25484	2.23242	3.17655	3.50791	3.87462	4.26756	4.68014	5.23255	5.98602	6.86723	9.6181
0	0	0	0	0	0	0	0	0	0	0.0972909	0.158184	0.246094	0.246094	0.36215	0.496094	0.851237	1.04409	1.25484	2.23242	3.32354	3.65634	3.87462	4.26756	4.75203	5.26187	5.99432	6.90979	12.2827
0	0	0	0	0	0	0	0	0	0	0.110695	0.183296	0.246094	0.246094	0.405388	0.497541	0.860412	1.05257	1.25484	2.26448	3.33557	3.68388	3.87462	4.28195	4.79361	5.32579	5.99432	6.96627	14.2081
0	0	0	0	0	0	0	0	0	0	0.122376	0.186574	0.246094	0.246094	0.406011	0.521905	0.873959	1.07627	1.25484	2.34007	3.33713	3.68748	3.97148	4.29389	4.8162	5.3266	6.02265	6.99465	16.0676
0	0	0	0	0	0	0	0	0	0	0.124855	0.191813	0.246094	0.246094	0.418927	0.539684	0.874133	1.10056	1.25484	2.34007	3.33713	3.68748	3.9753	4.3884	4.87833	5.33727	6.0556	7.01329	17.9213
0	0	0	0	0	0	0	0	0	0	0.132288	0.195304	0.246094	0.246094	0.438642	0.550282	0.884485	1.10056	1.25484	2.44298	3.33804	3.72896	3.99964	4.4473	4.89225	5.37311	6.12631	7.02021	18.5256
0	0	0	0	0	0	0	0	0	0	0.136266	0.198	0.246094	0.246094	0.456723	0.550282	0.887304	1.1093	1.2648	2.46094	3.34551	3.74426	4.11209	4.51876	4.92318	5.403	6.14135	7.19336	19.5769
0	0	0	0	0	0	0	0	0	0	0.139348	0.205997	0.246094	0.248047	0.465769	0.550282	0.887304	1.1093	1.2648	2.46094	3.3738	3.75148	4.12832	4.55354	4.97043	5.42188	6.16136	7.21045	33.3943
0	0	0	0	0	0	0	0	0	0	0.148096	0.210579	0.246094	0.248047	0.492188	0.550282	0.887304	1.11672	1.27911	2.46094	3.37736	3.78627	4.13255	4.56029	4.97645	5.43887	6.18418	7.23175	33.5341
0	0	0	0	0	0	0	0	0	0	0.158764	0.229588	0.246094	0.248047	0.492188	0.550282	0.887304	1.1225	1.32526	2.47914	3.50791	3.87192	4.21297	4.56759	4.99185	5.5465	6.22098	7.23175	33.7417
0	0	0	0	0	0	0	0	0	0	0.161016	0.246094	0.246094	0.270241	0.492188	0.550282	0.887304	1.13235	1.32526	2.48047	3.52541	3.87462	4.23625	4.57376	5.00466	5.5465	6.24566	7.29528	35.9197
0	0	0	0	0	0	0	0	0	0	0.162581	0.246094	0.246375	0.271948	0.492188	0.550282	0.887304	1.14482	1.32526	2.48047	3.55149	3.87462	4.24462	4.58415	5.08318	5.5465	6.29919	7.46205
0	0	0	0	0	0	0	0	0	0	0.172755	0.246094	0.248047	0.278337	0.492188	0.550282	0.887304	1.15916	1.33577	2.48047	3.57738	3.87462	4.26756	4.61194	5.0895	5.62271	6.32398	7.46982
0	0	0	0	0	0	0	0	0	0	0.177223	0.246094	0.248047	0.291221	0.492188	0.550282	0.887304	1.18762	1.33577	2.48323	3.64307	3.88255	4.26756	4.6691	5.1076	5.67991	6.3531	7.54405
0	0	0	0	0	0	0	0	0	0.0486353	0.183344	0.246094	0.248047	0.296366	0.492188	0.553154	0.887304	1.19562	1.39212	2.52959	3.64372	3.90684	4.26756	4.68014	5.1076	5.76089	6.3531	7.61863
0	0	0	0	0	0	0	0	0	0.0513713	0.186295	0.246094	0.248047	0.328471	0.492188	0.562494	0.894346	1.23047	1.42001	2.53483	3.68632	3.92197	4.26756	4.68014	5.1076	5.76942	6.35676	7.6301
0	0	0	0	0	0	0	0	0	0.0722763	0.186442	0.246094	0.254384	0.348029	0.492188	0.568764	0.917415	1.23047	1.43462	2.6269	3.68748	3.92197	4.29323	4.68014	5.1076	5.7854	6.36446	7.68149
0	0	0	0	0	0	0	0	0	0.0725953	0.188545	0.246094	0.262665	0.348029	0.492188	0.578122	0.923418	1.23047	1.43496	2.65807	3.68748	3.9941	4.33905	4.68014	5.1244	5.81192	6.40134	7.7651
0	0	0	0	0	0	0	0	0.0533206	0.0831296	0.189861	0.246094	0.274988	0.348029	0.492188	0.60661	0.953501	1.23047	1.43496	2.67155	3.68748	4.05484	4.33905	4.69804	5.21489	5.82315	6.49201	7.91421
0	0	0	0	0	0	0	0	0.0657486	0.0856343	0.210126	0.246094	0.284543	0.348029	0.492188	0.625643	0.984375	1.23047	1.43496	2.7187	3.7207	4.05502	4.33994	4.75715	5.23255	5.88427	6.59077	8.11003
0	0	0	0	0	0	0	0	0.0689805	0.0978981	0.21607	0.246094	0.31219	0.348029	0.492188	0.654897	0.984375	1.23047	1.43496	2.72452	3.7207	4.06827	4.40031	4.77128	5.2763	5.89601	6.59535	8.19688
0	0	0	0	0	0	0	0	0.0789842	0.104222	0.217641	0.246094	0.325534	0.348029	0.492339	0.679615	0.984375	1.23047	1.43496	2.75141	3.7207	4.09089	4.42231	4.77128	5.30264	5.91684	6.60476	8.6781
0	0	0	0	0	0	0	0	0.0921022	0.105645	0.22639	0.246094	0.348029	0.348029	0.492393	0.700961	0.984375	1.23047	1.43496	2.75141	3.72487	4.09672	4.43304	4.77772	5.32391	5.95142	6.64791	8.72406
0	0	0	0	0	0	0	0	0.105681	0.106888	0.226447	0.246094	0.348029	0.348029	0.496338	0.738281	0.984375	1.23047	1.44635	2.75141	3.76564	4.09953	4.47173	4.8162	5.38087	5.96345	6.73281	8.87439
0	0	0	0	0	0	0	0	0.108937	0.115384	0.234549	0.246094	0.348029	0.348029	0.497661	0.738281	0.984375	1.23047	1.44635	2.77325	3.78627	4.11149	4.51286	4.85994	5.40187	5.97376	6.76939	9.50898
0	0	0	0	0	0	0	0	0.110045	0.120067	0.236891	0.246094	0.348029	0.350791	0.523335	0.738281	0.984375	1.23047	1.49397	2.77325	3.7893	4.12832	4.54737	4.89451	5.44009	5.97376	6.7749	9.65154
0	0	0	0	0	0	0	0	0.113602	0.141638	0.246094	0.246094	0.348029	0.356592	0.531158	0.738281	0.984375	1.23047	1.49693	2.77325	3.7922	4.12832	4.55354	4.91266	5.44574	5.99432	6.8042	10.8971
0	0	0	0	0	0	0	0	0.129549	0.148892	0.246094	0.246094	0.348029	0.359463	0.53211	0.738281	0.984375	1.23047	1.50881	2.77325	3.87462	4.1348	4.57376	4.96094	5.45064	6.00458	6.82062	12.4642
0	0	0	0	0	0	0	0	0.130079	0.150181	0.246094	0.246094	0.348029	0.36258	0.532975	0.738281	0.984375	1.23047	1.50881	2.77325	3.90573	4.15802	4.64605	4.97721	5.46267	6.04216	6.84268	13.8662
0	0	0	0	0	0	0	0	0.131601	0.157559	0.246094	0.246094	0.348029	0.393898	0.550282	0.738281	0.984375	1.23047	1.50881	2.77325	3.91002	4.2095	4.66038	5.00622	5.4811	6.0556	6.89195	15.7661
0	0	0	0	0	0	0	0	0.149485	0.157758	0.246094	0.246094	0.348029	0.397436	0.550282	0.738281	0.984375	1.23047	1.55643	2.78341	3.92197	4.23635	4.6682	5.05908	5.48454	6.08009	6.98947	17.8214
0	0	0	0	0	0	0	0	0.153571	0.158581	0.246094	0.246094	0.350791	0.40885	0.550282	0.738281	0.984375	1.23047	1.57577	2.8019	3.98061	4.31262	4.7517	5.07315	5.50753	6.10115	6.99757	18.2141
0	0	0	0	0	0	0	0	0.155036	0.162619	0.246094	0.248047	0.350791	0.425837	0.550282	0.738281	0.9992	1.23047	1.57577	2.82817	3.98973	4.33905	4.75638	5.0796	5.53323	6.12631	7.15477	19.196
0	0	0	0	0	0	0	0	0.15964	0.167793	0.246094	0.256801	0.350791	0.430753	0.550282	0.738281	1.01467	1.23047	1.57577	2.82817	4.03791	4.41635	4.76482	5.11362	5.5465	6.1797	7.26996	19.2296
0	0	0	0	0	0	0	0	0.160878	0.176723	0.246094	0.258941	0.36649	0.431025	0.550282	0.738281	1.01467	1.23047	1.57631	2.82817	4.04534	4.42255	4.76482	5.14403	5.57416	6.21604	7.3217	19.7147
0	0	0	0	0	0	0	0	0.164202	0.181419	0.246094	0.2811	0.370636	0.445093	0.55465	0.74125	1.01467	1.23047	1.57962	2.8864	4.06827	4.42864	4.77128	5.16697	5.61266	6.21605	7.36313	31.0851
0	0	0	0	0	0	0	0	0.166456	0.186997	0.246094	0.287149	0.375307	0.480559	0.569121	0.760195	1.01467	1.23047	1.58827	2.88785	4.06827	4.44696	4.78585	5.18336	5.62361	6.24526	7.36563	32.1515
0	0	0	0	0	0	0	0.0609653	0.177129	0.193939	0.246094	0.289886	0.376508	0.480796	0.574572	0.76154	1.01467	1.23047	1.58827	2.96371	4.10591	4.45233	4.79633	5.21489	5.62361	6.26042	7.37496	32.3813
0	0	0	0	0	0	0	0.0649968	0.177481	0.21596	0.246094	0.298131	0.383379	0.492188	0.580862	0.778217	1.01467	1.24023	1.66062	3.00733	4.1423	4.47173	4.81497	5.23255	5.66178	6.28005	7.43313	32.5197
0	0	0	0	0	0	0	0.0676926	0.178534	0.219995	0.246094	0.299371	0.39181	0.492188	0.62791	0.778217	1.02272	1.25484	1.66395	3.01762	4.19368	4.47173	4.8162	5.26187	5.66496	6.2906	7.49906	33.6037
0	0	0	0	0	0	0	0.0724664	0.179324	0.232755	0.246094	0.300806	0.402363	0.492188	0.696058	0.778217	1.04409	1.25484	1.66395	3.0278	4.1952	4.48119	4.86866	5.27355	5.71395	6.3531	7.78488	35.8331
0	0	0	0	0	0	0	0.0727207	0.18211	0.233006	0.246094	0.348029	0.402363	0.492188	0.696058	0.778217	1.04409	1.25484	1.72266	3.03086	4.2095	4.52664	4.87335	5.27355	5.73599	6.35531	7.84393
0	0	0	0	0	0	0	0.0812739	0.190552	0.244405	0.246094	0.348029	0.404935	0.492188	0.696058	0.778217	1.04409	1.25484	1.72266	3.04943	4.21544	4.52795	4.87409	5.32579	5.7854	6.40134	7.87915
0	0	0	0	0	0	0	0.0877545	0.206975	0.246094	0.246094	0.348029	0.419311	0.492188	0.696058	0.778217	1.04409	1.25484	1.73633	3.07396	4.24414	4.55354	4.89225	5.32579	5.79071	6.46827	7.8906
0	0	0	0	0	0	0	0.0916112	0.207162	0.246094	0.246094	0.348029	0.463909	0.492188	0.701583	0.780669	1.05237	1.25484	1.74015	3.08562	4.26076	4.56029	4.89225	5.32579	5.85412	6.49396	7.92586
0	0	0	0	0	0	0	0.092105	0.216434	0.246094	0.246094	0.348029	0.492188	0.496094	0.701583	0.782476	1.0907	1.25484	1.74802	3.15712	4.26756	4.57376	4.90432	5.3266	5.85728	6.49433	8.08776
0	0	0	0	0	0	0	0.094712	0.220183	0.246094	0.246094	0.348029	0.492188	0.496094	0.723986	0.784393	1.10056	1.25484	1.75366	3.17655	4.27917	4.57405	4.91108	5.41812	5.89601	6.51094	8.55312
0	0	0	0	0	0	0	0.0950993	0.222484	0.246094	0.246094	0.348029	0.492188	0.501778	0.738281	0.784393	1.10056	1.25484	1.75396	3.17655	4.31171	4.58366	4.92359	5.44009	5.91684	6.59077	8.90554
0	0	0	0	0	0	0	0.113358	0.227708	0.246094	0.246094	0.350791	0.492188	0.514076	0.738281	0.867465	1.10056	1.25484	1.80581	3.17655	4.31714	4.58385	4.97645	5.44574	5.96892	6.60424	8.98806
0	0	0	0	0	0	0	0.120492	0.228457	0.246094	0.248047	0.350791	0.492188	0.538978	0.738281	0.873251	1.10056	1.2648	1.84395	3.22461	4.33306	4.60332	4.98892	5.46267	5.97376	6.71152	9.45607
0	0	0	0	0	0	0	0.121702	0.235809	0.246094	0.248047	0.358093	0.492188	0.547644	0.738281	0.887304	1.10056	1.2648	1.88907	3.30444	4.33905	4.61394	5.05609	5.46936	5.98576	6.72835	9.65154
0	0	0	0	0	0	0	0.122887	0.240793	0.246094	0.248047	0.371363	0.492188	0.550282	0.738281	0.887304	1.10056	1.32526	1.88907	3.3279	4.33905	4.61595	5.06769	5.47873	5.98779	6.77036	10.0359
0	0	0	0	0	0	0	0.12462	0.243261	0.246094	0.275518	0.384808	0.492188	0.550282	0.738281	0.887304	1.1093	1.32526	1.90298	3.33713	4.33905	4.68014	5.0895	5.5465	5.99432	6.95772	11.0847
0	0	0	0	0	0	0	0.142327	0.246094	0.246094	0.277872	0.391712	0.492188	0.550282	0.738281	0.887304	1.1093	1.32526	1.92205	3.33713	4.33905	4.69267	5.0895	5.5465	5.99945	6.99511	12.134
0	0	0	0	0	0	0	0.144615	0.246094	0.246094	0.283516	0.413799	0.492188	0.550282	0.738281	0.894346	1.11428	1.32526	1.93731	3.3738	4.35364	4.69804	5.1076	5.57416	6.04539	7.01583	13.3485
0	0	0	0	0	0	0	0.145945	0.246094	0.246094	0.29962	0.427941	0.492188	0.550282	0.738281	0.894346	1.23047	1.32526	1.98438	3.39447	4.37953	4.73893	5.1076	5.59619	6.06932	7.02021	15.3007
0	0	0	0	0	0	0	0.154429	0.246094	0.246094	0.304538	0.460977	0.492188	0.550282	0.738281	0.894346	1.23047	1.32526	1.98438	3.40971	4.3884	4.74963	5.1076	5.65509	6.12631	7.10731	17.515
0	0	0	0	0	0	0	0.174637	0.246094	0.246094	0.317737	0.462579	0.492188	0.550282	0.738281	0.984375	1.23047	1.32526	1.99982	3.42824	4.39125	4.75321	5.11362	5.66115	6.20117	7.14185	17.6166
0	0	0	0	0	0	0	0.177341	0.246094	0.246094	0.328471	0.47198	0.492188	0.550282	0.738281	0.984375	1.23047	1.32526	1.99982	3.45731	4.3954	4.75515	5.11437	5.66178	6.20117	7.19058	18.8662
0	0	0	0	0	0	0	0.18361	0.246094	0.246094	0.33094	0.492188	0.492188	0.550282	0.738281	0.984375	1.23047	1.32526	1.99982	3.46291	4.40031	4.7595	5.18987	5.68894	6.22098	7.21534	19.1687
0	0	0	0	0	0	0.015915	0.185938	0.246094	0.246094	0.348029	0.492188	0.492188	0.550282	0.738281	0.984375	1.23047	1.32526	1.99982	3.51038	4.40259	4.77128	5.20591	5.69837	6.22106	7.23175	19.3174
0	0	0	0	0	0	0.0261731	0.186679	0.246094	0.246094	0.348029	0.492188	0.492188	0.550282	0.738281	0.984375	1.23047	1.33577	2.01386	3.52541	4.41635	4.77128	5.21489	5.70805	6.22597	7.39995	19.6255
0	0	0	0	0	0	0.0280765	0.190192	0.246094	0.246094	0.348029	0.492188	0.492188	0.550282	0.738281	0.984375	1.23047	1.33577	2.11698	3.54641	4.42652	4.88596	5.21636	5.71047	6.25541	7.53159	19.7848
0	0	0	0	0	0	0.0326596	0.192837	0.246094	0.246094	0.348029	0.492188	0.492188	0.55465	0.738281	0.984375	1.23047	1.33577	2.11698	3.57738	4.43864	4.89225	5.2232	5.73987	6.30941	7.6614	28.2654
0	0	0	0	0	0	0.0328572	0.197746	0.246094	0.246094	0.348029	0.492188	0.496094	0.55465	0.744141	0.984375	1.23047	1.35504	2.11698	3.68748	4.47173	4.89435	5.30843	5.76942	6.32779	7.71179	30.5863
0	0	0	0	0	0	0.0330646	0.212304	0.246094	0.246094	0.348029	0.492188	0.496094	0.55465	0.744141	0.984375	1.23047	1.36915	2.11698	3.68748	4.56029	4.91108	5.30843	5.77075	6.33856	7.84393	30.9413
0	0	0	0	0	0	0.0391523	0.212754	0.246094	0.246094	0.348029	0.492188	0.504816	0.55465	0.749588	0.984375	1.23047	1.39212	2.13378	3.68748	4.56029	4.92359	5.32579	5.771	6.33856	7.84393	31.1395
0	0	0	0	0	0	0.0488787	0.224284	0.246094	0.246094	0.355212	0.492188	0.512411	0.55465	0.753619	0.984375	1.23047	1.42869	2.13378	3.69141	4.57376	4.92359	5.3293	5.7854	6.44922	7.89475	31.3689
0	0	0	0	0	0	0.049691	0.227379	0.246094	0.246094	0.360167	0.492188	0.550282	0.563637	0.778217	0.984375	1.23047	1.43496	2.13378	3.70688	4.58947	4.96026	5.40741	5.78798	6.46166	7.99927	31.4149
0	0	0	0	0	0	0.0544948	0.228014	0.246094	0.246094	0.385173	0.492188	0.550282	0.611962	0.778217	1.01467	1.23047	1.43496	2.13378	3.7207	4.60846	4.96094	5.43807	5.79071	6.54863	8.00696	33.5093
0	0	0	0	0	0	0.0704122	0.238482	0.246094	0.246094	0.409672	0.492188	0.550282	0.623846	0.778217	1.01467	1.23047	1.43496	2.1847	3.76088	4.62242	4.96094	5.44009	5.8029	6.56739	8.03485	35.7687
0	0	0	0	0	0	0.0778432	0.246094	0.246094	0.248047	0.462579	0.492188	0.550282	0.633988	0.778217	1.01467	1.23047	1.43496	2.21484	3.78627	4.6339	4.99185	5.44574	5.81192	6.59077	8.55312
0	0	0	0	0	0	0.0795706	0.246094	0.246094	0.248047	0.463909	0.492188	0.550282	0.648317	0.778217	1.01467	1.23047	1.43496	2.21484	3.78627	4.65222	5.02257	5.48907	5.81192	6.60407	8.61048
0	0	0	0	0	0	0.0889548	0.246094	0.246094	0.274064	0.465586	0.492188	0.550282	0.696058	0.778217	1.01467	1.23047	1.43496	2.21484	3.80019	4.66038	5.08068	5.51441	5.85412	6.65858	8.98806
0	0	0	0	0	0	0.0899	0.246094	0.246094	0.274076	0.470207	0.492188	0.550282	0.696058	0.778217	1.02226	1.23047	1.43496	2.23242	3.80795	4.67355	5.0895	5.5465	5.88033	6.67426	9.49731
0	0	0	0	0	0	0.0923406	0.246094	0.246094	0.278048	0.47198	0.492188	0.550282	0.696058	0.778217	1.02272	1.23047	1.44635	2.23949	3.873	4.68014	5.1076	5.5465	5.88033	6.7476	9.51435
0	0	0	0	0	0	0.102242	0.246094	0.246094	0.280431	0.482237	0.492188	0.550282	0.696058	0.778217	1.03205	1.23047	1.44635	2.24616	3.87462	4.68014	5.11362	5.5987	5.89601	6.86766	9.54578
0	0	0	0	0	0	0.108126	0.246094	0.246094	0.281555	0.492188	0.492188	0.550282	0.701583	0.778217	1.04409	1.23047	1.44635	2.28688	3.87462	4.7215	5.17131	5.6031	5.95	6.89195	10.2272
0	0	0	0	0	0	0.109811	0.246094	0.246094	0.306363	0.492188	0.492188	0.550282	0.719632	0.778217	1.04409	1.23047	1.47656	2.30804	3.87462	4.73307	5.17234	5.62361	5.99432	6.9518	10.7693
0	0	0	0	0	0.0241429	0.117559	0.246094	0.246094	0.307821	0.492188	0.492188	0.550282	0.720905	0.778217	1.04409	1.25484	1.48828	2.32075	3.89108	4.73893	5.21489	5.6449	6.0556	7.02459	11.6238
0	0	0	0	0	0.0392144	0.118596	0.246094	0.246094	0.319421	0.492188	0.496094	0.550282	0.734267	0.778217	1.05237	1.25484	1.49693	2.32164	3.89108	4.73893	5.21489	5.66178	6.05857	7.08127	12.6723
0	0	0	0	0	0.0465501	0.123525	0.246094	0.246094	0.34581	0.492188	0.496094	0.550282	0.738281	0.784393	1.08861	1.25484	1.50881	2.34007	3.89108	4.76482	5.21489	5.66721	6.11743	7.14185	14.5166
0	0	0	0	0	0.0543133	0.129456	0.246094	0.246094	0.348029	0.492188	0.496094	0.550282	0.738281	0.784393	1.10056	1.25484	1.50881	2.34007	3.89108	4.77128	5.21818	5.68307	6.19807	7.16802	16.7243
0	0	0	0	0	0.0611547	0.139709	0.246094	0.246094	0.348029	0.492188	0.496094	0.550282	0.738281	0.784393	1.10056	1.25484	1.53109	2.34007	3.92197	4.82114	5.25281	5.71047	6.20117	7.23175	17.036
0	0	0	0	0	0.0663416	0.156794	0.246094	0.246094	0.348029	0.492188	0.496094	0.550282	0.738281	0.803293	1.10056	1.25484	1.55295	2.38547	3.92197	4.83448	5.26502	5.71932	6.21604	7.29528	18.2496
0	0	0	0	0	0.0695941	0.157949	0.246094	0.246094	0.348029	0.492188	0.520203	0.550282	0.738281	0.844086	1.10056	1.25484	1.55643	2.40975	3.93822	4.88596	5.27355	5.76942	6.22098	7.34768	18.8907
0	0	0	0	0	0.0796839	0.159088	0.246094	0.246094	0.348029	0.492188	0.535455	0.550282	0.738281	0.864762	1.10056	1.25484	1.57577	2.44191	3.9506	4.88596	5.27472	5.76942	6.30564	7.59014	18.9703
0	0	0	0	0	0.079962	0.16327	0.246094	0.246094	0.348029	0.492188	0.550282	0.55465	0.738281	0.887304	1.10056	1.25484	1.57577	2.46094	3.95379	4.89225	5.28724	5.76942	6.31265	7.64129	19.2168
0	0	0	0	0	0.0915034	0.180486	0.246094	0.246094	0.348029	0.492188	0.550282	0.55465	0.738281	0.887304	1.10056	1.25484	1.57577	2.46094	3.95423	4.92359	5.29345	5.76942	6.3531	7.6614	19.2216
0	0	0	0	0	0.0924402	0.185504	0.246094	0.246094	0.348029	0.492188	0.550282	0.55465	0.738281	0.887304	1.10056	1.25484	1.57577	2.46094	3.96022	4.96094	5.3142	5.7854	6.44922	7.70145	19.7505
0	0	0	0	0	0.0977439	0.187261	0.246094	0.246094	0.348029	0.492188	0.550282	0.55465	0.738281	0.887304	1.1093	1.25484	1.57577	2.46094	3.97468	4.98478	5.32579	5.79996	6.46827	7.99927	19.7521
0	0	0	0	0	0.105975	0.198024	0.246094	0.246094	0.348029	0.492188	0.550282	0.55465	0.738281	0.887304	1.17642	1.25484	1.58827	2.4672	3.99253	4.99185	5.32956	5.81192	6.47576	8.00696	25.2667
0	0	0	0	0	0.106762	0.200532	0.246094	0.246094	0.348029	0.492188	0.550282	0.555521	0.738281	0.887304	1.23047	1.25484	1.65579	2.47321	4.03791	4.99185	5.34588	5.83833	6.5677	8.07582	28.1181
0	0	0	0	0	0.111899	0.20326	0.246094	0.248047	0.348029	0.492188	0.550282	0.596237	0.738281	0.887304	1.23047	1.25484	1.66395	2.47321	4.03791	5.03073	5.38008	5.8748	6.59077	8.09313	28.927
0	0	0	0	0	0.113059	0.209803	0.246094	0.248047	0.350791	0.492188	0.550282	0.625973	0.738281	0.887304	1.23047	1.25484	1.68468	2.47321	4.03791	5.06211	5.39077	5.89601	6.59077	8.1893	29.5748
0	0	0	0	0	0.114075	0.218329	0.246094	0.248047	0.350791	0.492188	0.550282	0.626648	0.738281	0.887304	1.23047	1.25484	1.72266	2.47321	4.04075	5.06228	5.44009	5.89752	6.66503	8.31975	30.0792
0	0	0	0	0	0.115658	0.22416	0.246094	0.248047	0.350791	0.492188	0.550282	0.635073	0.738281	0.894346	1.23047	1.25484	1.72266	2.48047	4.06012	5.09268	5.44009	5.91684	6.67887	8.43359	30.1283
0	0	0	0	0	0.118342	0.224699	0.246094	0.248047	0.350791	0.492188	0.550282	0.69197	0.738281	0.92325	1.23047	1.25484	1.72266	2.48047	4.07869	5.09431	5.45716	5.93295	6.71689	8.87439	30.2627
0	0	0	0	0	0.119728	0.239319	0.246094	0.248047	0.360438	0.492188	0.550282	0.696058	0.738281	0.923986	1.23047	1.2648	1.72266	2.48047	4.08702	5.11362	5.48385	5.99432	6.81113	9.31085	30.8387
0	0	0	0	0	0.123351	0.241611	0.246094	0.248047	0.382369	0.492188	0.550282	0.696058	0.747698	0.945992	1.23047	1.2648	1.73633	2.48047	4.09089	5.17201	5.5465	5.99432	6.81539	9.54342	33.4385
0	0	0	0	0	0.126775	0.246094	0.246094	0.248047	0.393529	0.492188	0.550282	0.696058	0.759122	0.984375	1.23047	1.2648	1.73633	2.49284	4.09474	5.18127	5.5465	6.03297	6.89195	9.54578	35.5253
0	0	0	0	0	0.12702	0.246094	0.246094	0.248047	0.395262	0.492188	0.550282	0.696058	0.778217	0.984375	1.23047	1.31716	1.74015	2.49284	4.12832	5.20105	5.58326	6.04005	6.96995	9.68654
0	0	0	0	0	0.127935	0.246094	0.246094	0.248047	0.405153	0.492188	0.550282	0.721352	0.778217	0.984375	1.23047	1.32526	1.74015	2.49284	4.1524	5.20625	5.62361	6.0556	6.97458	9.92188
0	0	0	0	0	0.136205	0.246094	0.246094	0.248047	0.407446	0.492188	0.55465	0.738281	0.778217	0.984375	1.23047	1.32526	1.74015	2.49498	4.17002	5.20679	5.65634	6.07375	6.98125	10.2693
0	0	0	0	0	0.144055	0.246094	0.246094	0.248047	0.413433	0.492188	0.55465	0.738281	0.778217	0.984375	1.23047	1.32526	1.74015	2.50967	4.2095	5.21489	5.65634	6.12631	6.98506	10.9647
0	0	0	0	0	0.145713	0.246094	0.246094	0.248047	0.421245	0.492188	0.55465	0.738281	0.778217	0.984375	1.23047	1.32526	1.74015	2.50967	4.2095	5.21489	5.71047	6.20117	7.09431	11.0624
0	0	0	0	0	0.154322	0.246094	0.246094	0.248047	0.435953	0.492188	0.55465	0.738281	0.778217	0.984375	1.23047	1.32526	1.74015	2.50967	4.21166	5.21489	5.74827	6.20117	7.222	11.7082
0	0	0	0	0	0.155309	0.246094	0.246094	0.248047	0.462579	0.492188	0.596809	0.738281	0.778217	0.984375	1.23047	1.32526	1.74015	2.53369	4.2168	5.21628	5.76942	6.21604	7.23175	13.4518
0	0	0	0	0	0.157112	0.246094	0.246094	0.262998	0.462579	0.492188	0.61144	0.738281	0.778217	0.984375	1.23047	1.32526	1.75396	2.53369	4.23635	5.23115	5.76942	6.25309	7.2445	15.7856
0	0	0	0	0	0.157477	0.246094	0.246094	0.270342	0.486901	0.494985	0.622244	0.738281	0.778217	0.984375	1.23047	1.32526	1.75396	2.53488	4.25198	5.23655	5.7854	6.27514	7.29528	15.8827
0	0	0	0	0	0.158587	0.246094	0.246094	0.296969	0.492188	0.507564	0.649873	0.738281	0.778217	0.984375	1.23047	1.32526	1.75396	2.5538	4.26602	5.24625	5.7948	6.3075	7.39995	16.2371
0	0	0	0	0	0.164221	0.246094	0.246094	0.304115	0.492188	0.536355	0.652715	0.738281	0.778217	1.01467	1.23047	1.32526	1.75396	2.5538	4.26756	5.27355	5.80663	6.32398	7.48524	17.3367
0	0	0	0	0	0.177263	0.246094	0.246094	0.315384	0.492188	0.550282	0.686061	0.738281	0.778217	1.01467	1.23047	1.32526	1.75396	2.56265	4.26756	5.27355	5.80663	6.35794	7.54405	18.337
0	0	0	0	0	0.178349	0.246094	0.246094	0.31542	0.492188	0.550282	0.694876	0.738281	0.778217	1.01467	1.23047	1.32526	1.77461	2.56591	4.31796	5.30693	5.81822	6.46827	7.70544	18.4374
0	0	0	0	0	0.181482	0.246094	0.246094	0.32125	0.492188	0.550282	0.696058	0.738281	0.784393	1.01467	1.23047	1.32526	1.78622	2.56929	4.33195	5.31799	5.89601	6.51844	7.87915	18.5123
0	0	0	0	0	0.183259	0.246094	0.246094	0.329164	0.492188	0.550282	0.696058	0.738281	0.784393	1.01467	1.23047	1.32526	1.78869	2.58969	4.33617	5.32579	5.89601	6.59077	8.07582	18.7944
0	0	0	0	0	0.18892	0.246094	0.246094	0.340593	0.492188	0.550282	0.696058	0.738281	0.784393	1.01467	1.23047	1.32526	1.78869	2.58969	4.33905	5.32579	5.91684	6.59077	8.12222	18.8581
0	0	0	0	0	0.189473	0.246094	0.246094	0.348029	0.492188	0.550282	0.696058	0.738281	0.784393	1.01467	1.23047	1.32526	1.80581	2.63677	4.33905	5.3546	5.96345	6.59437	8.24546	18.9557
0	0	0	0	0	0.190769	0.246094	0.246094	0.348029	0.492188	0.550282	0.696058	0.738281	0.887304	1.01467	1.23047	1.32526	1.80581	2.64144	4.36873	5.40571	5.98733	6.62072	8.29011	19.4934
0	0	0	0	0	0.195364	0.246094	0.246094	0.348029	0.492188	0.550282	0.696058	0.738281	0.887304	1.01467	1.23047	1.32526	1.85078	2.66176	4.3884	5.44009	5.99306	6.67887	8.43359	19.7022
0	0	0	0	0	0.196545	0.246094	0.246094	0.348029	0.492188	0.550282	0.696058	0.738281	0.887304	1.02272	1.23047	1.33577	1.89086	2.66642	4.3884	5.46267	5.99432	6.74602	8.53512	22.2759
0	0	0	0	0	0.202354	0.246094	0.246094	0.348029	0.492188	0.55465	0.715439	0.738281	0.887304	1.04409	1.23047	1.33577	1.92205	2.6939	4.39239	5.49075	6.00761	6.77036	8.87439	25.1116
0	0	0	0	0	0.208323	0.246094	0.246094	0.348029	0.492188	0.55465	0.720905	0.738281	0.887304	1.04409	1.23047	1.35441	1.92205	2.72359	4.41812	5.49075	6.0556	6.85355	8.96064	27.2682
0	0	0	0	0	0.211733	0.246094	0.246094	0.348029	0.492188	0.55465	0.738281	0.738281	0.887304	1.05237	1.23047	1.37244	1.92205	2.72852	4.43652	5.50753	6.08094	6.86064	9.3767	27.9149
0	0	0	0	0	0.213284	0.246094	0.246094	0.348029	0.492188	0.55465	0.738281	0.738281	0.887304	1.10056	1.23047	1.38139	1.92205	2.72852	4.43652	5.57416	6.08819	6.95013	9.42904	28.0117
0	0	0	0	0.0326368	0.223973	0.246094	0.246094	0.348029	0.492188	0.565446	0.738281	0.738281	0.887304	1.10056	1.23047	1.39212	1.93731	2.72987	4.43652	5.57416	6.09202	6.98604	9.49731	28.4228
0	0	0	0	0.0592612	0.228825	0.246094	0.246094	0.348029	0.492188	0.61144	0.738281	0.744141	0.887304	1.10056	1.23047	1.40317	1.93731	2.73977	4.47173	5.59619	6.10115	7.05518	9.54578	28.5642
0	0	0	0	0.0738692	0.22892	0.246094	0.246094	0.348029	0.492188	0.61473	0.738281	0.744141	0.894346	1.10056	1.23047	1.4212	1.93731	2.73977	4.47897	5.61627	6.12631	7.10731	9.6324	28.927
0	0	0	0	0.0830706	0.234373	0.246094	0.246094	0.350729	0.492188	0.622244	0.738281	0.758532	0.965194	1.17642	1.23047	1.43496	1.93731	2.74172	4.49542	5.62591	6.16136	7.1133	9.65073	29.0215
0	0	0	0	0.101297	0.239865	0.246094	0.246094	0.350791	0.492188	0.636146	0.738281	0.778217	0.984375	1.19786	1.23047	1.43496	1.93731	2.75141	4.55354	5.66178	6.22098	7.14185	10.0451	30.7618
0	0	0	0	0.108569	0.239883	0.246094	0.246178	0.350791	0.492188	0.640674	0.738281	0.778217	0.984375	1.23019	1.23047	1.43496	1.96875	2.75141	4.56029	5.66721	6.22098	7.15477	10.7321	33.191
0	0	0	0	0.109247	0.246094	0.246094	0.248047	0.350791	0.492188	0.669977	0.738281	0.778217	0.984375	1.23047	1.23047	1.43496	1.98407	2.77325	4.56029	5.66848	6.24663	7.15906	11.2472	35.3621
0	0	0	0	0.11603	0.246094	0.246094	0.248047	0.350791	0.492188	0.684546	0.738281	0.778217	0.984375	1.23047	1.24023	1.43496	1.98438	2.77325	4.563	5.72661	6.30884	7.29528	12.648
0	0	0	0	0.11912	0.246094	0.246094	0.248047	0.35509	0.492188	0.692615	0.738281	0.778217	0.984375	1.23047	1.24023	1.43496	1.99982	2.77325	4.57376	5.76942	6.33727	7.40175	13.1652
0	0	0	0	0.120893	0.246094	0.246094	0.248047	0.356472	0.492188	0.696058	0.738281	0.778217	0.984375	1.23047	1.24023	1.44635	1.99982	2.77325	4.57376	5.7854	6.33856	7.44141	14.9179
0	0	0	0	0.125739	0.246094	0.246094	0.248047	0.356472	0.492188	0.696058	0.738281	0.778217	0.984375	1.23047	1.25484	1.44635	2.01738	2.77325	4.57376	5.8246	6.43967	7.53181	15.1552
0	0	0	0	0.131717	0.246094	0.246094	0.248047	0.356727	0.492188	0.696058	0.738281	0.778217	0.984375	1.23047	1.25484	1.44635	2.05907	2.80125	4.59842	5.85579	6.48653	7.54405	15.2846
0	0	0	0	0.132044	0.246094	0.246094	0.248047	0.388866	0.492188	0.696058	0.738281	0.778217	0.984375	1.23047	1.25484	1.47656	2.06874	2.82817	4.6339	5.89601	6.49201	7.57254	15.8012
0	0	0	0	0.141726	0.246094	0.246094	0.248047	0.420819	0.492188	0.696058	0.738281	0.778217	0.984375	1.23047	1.25484	1.47656	2.11698	2.82817	4.6339	5.89601	6.51094	7.87915	16.4704
0	0	0	0	0.146623	0.246094	0.246094	0.248047	0.422183	0.492188	0.696058	0.738281	0.778217	0.994855	1.23047	1.25484	1.47656	2.11698	2.85431	4.66038	5.91684	6.54863	7.88305	16.9563
0	0	0	0	0.149311	0.246094	0.246094	0.248047	0.438765	0.492188	0.696058	0.738281	0.778217	1.00666	1.23047	1.25484	1.47656	2.11698	2.87395	4.67727	6.00458	6.59077	8.22952	17.4075
0	0	0	0	0.150572	0.246094	0.246094	0.248047	0.441971	0.496094	0.696058	0.738281	0.778217	1.01467	1.23047	1.25484	1.47656	2.11698	2.88045	4.68014	6.00458	6.68263	8.24546	17.6532
0	0	0	0	0.154075	0.246094	0.246094	0.248047	0.480672	0.496094	0.696058	0.738281	0.778217	1.01467	1.23047	1.25484	1.47691	2.11698	2.8927	4.70183	6.01108	6.74324	8.4263	17.7523
0	0	0	0	0.155871	0.246094	0.246094	0.248047	0.482237	0.496094	0.696058	0.744141	0.778217	1.01467	1.23047	1.25484	1.48828	2.11698	2.95312	4.71278	6.02393	6.77036	8.43359	18.0581
0	0	0	0	0.159021	0.246094	0.246094	0.248047	0.492188	0.496094	0.701583	0.758532	0.784393	1.01467	1.23047	1.25484	1.48828	2.11698	2.95312	4.72427	6.03226	6.82467	8.73815	18.2141
0	0	0	0	0.159519	0.246094	0.246094	0.248047	0.492188	0.496094	0.701583	0.778217	0.784393	1.01467	1.23047	1.25484	1.48828	2.11953	2.97356	4.75804	6.08127	6.85325	8.76978	18.4174
0	0	0	0	0.159542	0.246094	0.246094	0.255502	0.492188	0.496094	0.701583	0.778217	0.784393	1.01467	1.23047	1.25484	1.48828	2.13378	2.97656	4.75833	6.10115	6.89642	8.80828	18.8809
0	0	0	0	0.160209	0.246094	0.246094	0.267934	0.492188	0.496094	0.72231	0.778217	0.843141	1.01467	1.23047	1.25484	1.49693	2.13378	2.97656	4.76438	6.1036	6.95707	8.87439	19.0609
0	0	0	0	0.164229	0.246094	0.246094	0.27989	0.492188	0.500459	0.738281	0.778217	0.851392	1.01467	1.23047	1.25484	1.49693	2.13378	2.97656	4.77128	6.1136	6.98506	8.88133	19.3222
0	0	0	0	0.164905	0.246094	0.246094	0.282531	0.492188	0.503323	0.738281	0.778217	0.859258	1.04409	1.23047	1.25484	1.49693	2.13378	2.97989	4.77128	6.12631	7.0121	9.08339	19.4317
0	0	0	0	0.165551	0.246094	0.246094	0.282985	0.492188	0.507564	0.738281	0.778217	0.866518	1.04409	1.23047	1.25484	1.50881	2.18023	2.98688	4.7752	6.16167	7.02609	9.10707	22.1026
0	0	0	0	0.176762	0.246094	0.246094	0.292819	0.492188	0.512653	0.738281	0.778217	0.887304	1.04409	1.23047	1.25484	1.50881	2.20113	2.98688	4.77708	6.22098	7.10731	9.14752	24.995
0	0	0	0	0.177415	0.246094	0.246094	0.31044	0.492188	0.515925	0.738281	0.778217	0.887304	1.04409	1.23047	1.25484	1.56587	2.21484	2.99716	4.78414	6.22098	7.14185	9.18109	25.5199
0	0	0	0	0.17894	0.246094	0.246094	0.316842	0.492188	0.550282	0.738281	0.778217	0.887304	1.04409	1.23047	1.25484	1.56879	2.21484	3.00396	4.8162	6.27514	7.15477	9.54578	26.2555
0	0	0	0	0.179488	0.246094	0.246094	0.32069	0.492188	0.550282	0.738281	0.778217	0.887304	1.04409	1.23047	1.25484	1.56879	2.21484	3.0278	4.83933	6.27514	7.21759	9.6127	26.5352
0	0	0	0	0.184804	0.246094	0.246094	0.332235	0.492188	0.550282	0.738281	0.778217	0.887304	1.04409	1.23047	1.2648	1.57577	2.22847	3.06817	4.88596	6.31424	7.29949	10.2543	26.9037
0	0	0	0	0.187041	0.246094	0.246094	0.334851	0.492188	0.550282	0.738281	0.778217	0.887304	1.05237	1.23047	1.2648	1.57577	2.23242	3.1509	4.88596	6.32398	7.32474	11.4666	27.2682
0	0	0	0	0.187346	0.246094	0.246094	0.338512	0.492188	0.550282	0.738281	0.778217	0.887304	1.08256	1.23047	1.2648	1.57577	2.23242	3.15712	4.89225	6.33856	7.37496	11.8778	27.4571
0	0	0	0	0.191074	0.246094	0.246094	0.348029	0.492188	0.550282	0.738281	0.778217	0.887304	1.08861	1.23047	1.2648	1.57577	2.23242	3.16904	4.90837	6.36984	7.53181	13.3485	27.6859
0	0	0	0	0.198598	0.246094	0.248047	0.348029	0.492188	0.550282	0.738281	0.778217	0.887304	1.09704	1.23047	1.30227	1.57577	2.23242	3.17655	4.90932	6.37767	7.54405	14.0492	27.9336
0	0	0	0	0.201881	0.246094	0.248047	0.348029	0.492188	0.550282	0.738281	0.779387	0.894346	1.10056	1.23047	1.32526	1.57577	2.23242	3.17655	4.91108	6.43967	7.64129	14.331	30.5108
0	0	0	0	0.205632	0.246094	0.248047	0.348029	0.492188	0.550282	0.738281	0.784393	0.894346	1.10056	1.23047	1.32526	1.57577	2.23242	3.17655	4.917	6.44922	7.70145	14.3867	33.0238
0	0	0	0	0.20709	0.246094	0.248047	0.348029	0.492188	0.550282	0.738281	0.784393	0.894346	1.10056	1.23047	1.32526	1.57577	2.23242	3.17825	4.92359	6.51094	7.72538	14.7374	34.8909
0	0	0	0	0.214288	0.246094	0.248047	0.348029	0.492188	0.550282	0.738281	0.784393	0.894346	1.10056	1.23047	1.32526	1.57577	2.23949	3.19922	4.93823	6.51094	7.87915	14.9014
0	0	0	0	0.218925	0.246094	0.248047	0.348029	0.492188	0.550282	0.738281	0.784393	0.894346	1.10056	1.23047	1.32526	1.57577	2.26887	3.19922	4.95213	6.57439	7.88305	14.9097
0	0	0	0	0.219474	0.246094	0.248047	0.348029	0.492188	0.550282	0.738281	0.784393	0.894346	1.10056	1.23047	1.32526	1.57577	2.27734	3.20507	4.99185	6.65493	7.98773	15.4706
0	0	0	0	0.223008	0.246094	0.248047	0.348029	0.492188	0.550282	0.744141	0.784393	0.91528	1.10056	1.23047	1.32526	1.57577	2.28688	3.2052	4.99978	6.7476	8.19149	15.8478
0	0	0	0	0.226725	0.246094	0.248047	0.348029	0.492188	0.550282	0.744141	0.859258	0.923986	1.10056	1.23709	1.32526	1.58827	2.28688	3.20867	5.00808	6.7476	8.21556	16.5226
0	0	0	0	0.226939	0.246094	0.248047	0.348029	0.492188	0.551872	0.744141	0.882017	0.958166	1.10056	1.23919	1.32526	1.58827	2.28791	3.20867	5.05909	6.77036	8.25665	16.5821
0	0	0	0	0.227552	0.246094	0.248047	0.348029	0.492188	0.55465	0.744141	0.887304	0.965194	1.10056	1.24023	1.32526	1.58827	2.29093	3.20982	5.07335	6.8152	8.31605	16.7739
0	0	0	0	0.229449	0.246094	0.248047	0.348029	0.492188	0.55465	0.750822	0.887304	0.984375	1.10056	1.24023	1.32526	1.62901	2.32164	3.22461	5.07335	6.82467	8.61048	16.8836
0	0	0	0	0.231695	0.246094	0.248047	0.348749	0.492188	0.55465	0.778217	0.887304	0.984375	1.10056	1.24023	1.32526	1.65822	2.32164	3.23414	5.07335	6.82467	8.65325	17.2566
0	0	0	0	0.236017	0.246094	0.248047	0.350791	0.492188	0.55465	0.778217	0.887304	0.984375	1.10056	1.24023	1.32526	1.72266	2.32164	3.23414	5.10337	6.83809	8.68164	17.2727
0	0	0	0	0.237086	0.246094	0.248047	0.350791	0.492188	0.566964	0.778217	0.887304	0.984375	1.10056	1.25484	1.32526	1.72266	2.32164	3.25987	5.11362	6.89195	8.76627	17.2745
0	0	0	0	0.238953	0.246094	0.248047	0.363903	0.492188	0.568369	0.778217	0.887304	0.984375	1.10056	1.25484	1.32526	1.72266	2.32164	3.33713	5.11362	6.965	8.80828	17.6549
0	0	0	0	0.240404	0.246094	0.248047	0.36633	0.492188	0.605262	0.778217	0.887304	0.984375	1.1093	1.25484	1.32526	1.72266	2.32164	3.33713	5.11362	6.98879	8.8327	17.7575
0	0	0	0	0.240429	0.246094	0.248047	0.369189	0.492188	0.606552	0.778217	0.887304	0.984375	1.1093	1.25484	1.32526	1.72266	2.33301	3.33713	5.14398	7.10482	8.87439	18.29
0	0	0	0.0427355	0.241368	0.246094	0.250272	0.409207	0.492188	0.62367	0.778217	0.887304	0.984375	1.1093	1.25484	1.33577	1.72266	2.34007	3.34724	5.1528	7.10731	9.3069	18.5919
0	0	0	0.0514565	0.241676	0.246094	0.261609	0.418514	0.492188	0.634898	0.778217	0.887304	0.984375	1.14529	1.25484	1.33577	1.73537	2.34007	3.3738	5.17937	7.14185	9.54578	18.9849
0	0	0	0.0640244	0.242483	0.246094	0.262343	0.42154	0.496094	0.640654	0.778217	0.887304	0.984375	1.15641	1.25484	1.35525	1.73633	2.37195	3.42769	5.18254	7.21045	9.91257	19.1254
0	0	0	0.073924	0.24404	0.246094	0.267912	0.429505	0.496094	0.644686	0.778217	0.887304	0.984375	1.23019	1.25484	1.3856	1.73633	2.37786	3.45125	5.21489	7.29949	10.4651	21.9588
0	0	0	0.0828572	0.246094	0.246094	0.271901	0.454103	0.496094	0.649873	0.778217	0.887304	0.984375	1.23047	1.25484	1.38567	1.73633	2.40742	3.45489	5.21489	7.32474	11.3588	23.6322
0	0	0	0.083401	0.246094	0.246094	0.274603	0.45684	0.496094	0.69197	0.778217	0.887304	0.984375	1.23047	1.25484	1.39212	1.74015	2.41152	3.49765	5.21489	7.37496	12.2551	24.5052
0	0	0	0.0925838	0.246094	0.246094	0.275002	0.463263	0.496094	0.69437	0.778217	0.887304	0.984375	1.23047	1.25484	1.39212	1.74015	2.4362	3.50791	5.23736	7.37496	13.1558	24.6479
0	0	0	0.0966487	0.246094	0.246094	0.303658	0.465342	0.496094	0.696058	0.778217	0.894346	0.984375	1.23047	1.25484	1.39212	1.74015	2.4362	3.50791	5.25602	7.43313	13.1839	24.9099
0	0	0	0.107437	0.246094	0.246094	0.309656	0.468096	0.496094	0.696058	0.778217	0.895972	0.984375	1.23047	1.25484	1.39212	1.74015	2.45388	3.52353	5.25602	7.46205	13.5339	25.2436
0	0	0	0.112957	0.246094	0.246094	0.311206	0.480691	0.496094	0.696058	0.778217	0.934191	0.984375	1.23047	1.25484	1.41907	1.74015	2.45885	3.52541	5.25604	7.60902	13.5612	25.3797
0	0	0	0.128129	0.246094	0.246094	0.323816	0.488862	0.496094	0.696058	0.778217	0.984375	0.984375	1.23047	1.25484	1.43496	1.74015	2.46094	3.52541	5.27579	7.70544	14.0317	25.7969
0	0	0	0.133371	0.246094	0.246094	0.3246	0.492188	0.496094	0.696058	0.778217	0.984375	0.984375	1.23047	1.25484	1.43496	1.74015	2.46094	3.53357	5.30843	7.7651	14.0317	26.026
0	0	0	0.133431	0.246094	0.246094	0.344919	0.492188	0.500459	0.696058	0.778217	0.984375	0.984375	1.23047	1.25484	1.43496	1.74015	2.46094	3.55149	5.30894	7.76906	14.3824	26.1216
0	0	0	0.134299	0.246094	0.246094	0.348029	0.492188	0.503323	0.696058	0.778217	0.984375	0.984375	1.23047	1.25484	1.43496	1.74015	2.46682	3.55149	5.32579	7.87915	14.5673	27.6836
0	0	0	0.134606	0.246094	0.246094	0.348029	0.492188	0.504603	0.701583	0.778217	0.984375	1.00666	1.23047	1.25484	1.43496	1.74015	2.47321	3.57738	5.34309	7.88569	14.5673	30.3409
0	0	0	0.138685	0.246094	0.246094	0.348029	0.492188	0.507736	0.701583	0.784393	0.984375	1.01467	1.23047	1.2648	1.43496	1.75396	2.47321	3.58318	5.36607	7.91032	14.6537	32.5509
0	0	0	0.138956	0.246094	0.246094	0.348029	0.492188	0.519143	0.706777	0.784393	0.984375	1.01467	1.23047	1.2648	1.43496	1.75396	2.47321	3.61532	5.39718	8.04911	14.7687	34.4598
0	0	0	0.142427	0.246094	0.246094	0.348029	0.492188	0.52517	0.712804	0.784393	0.984375	1.01467	1.23047	1.2648	1.43496	1.75396	2.47321	3.62275	5.42813	8.12519	15.1207
0	0	0	0.142882	0.246094	0.246094	0.348029	0.492188	0.549228	0.738281	0.784393	0.984375	1.01467	1.23047	1.2648	1.43496	1.75396	2.47321	3.63603	5.44009	8.24546	15.2846
0	0	0	0.143884	0.246094	0.246094	0.348029	0.492188	0.550282	0.738281	0.784393	0.984375	1.01467	1.23047	1.2648	1.43496	1.75396	2.48047	3.64412	5.49425	8.29011	15.7661
0	0	0	0.144107	0.246094	0.246094	0.348029	0.492188	0.550282	0.738281	0.794073	0.984375	1.01467	1.23047	1.2648	1.43496	1.75396	2.48047	3.651	5.50282	8.31975	15.8827
0	0	0	0.148006	0.246094	0.246094	0.348029	0.492188	0.550282	0.738281	0.80396	0.984375	1.01467	1.23047	1.2648	1.43496	1.75396	2.48047	3.66054	5.50282	8.33452	16.3786
0	0	0	0.154948	0.246094	0.246094	0.348029	0.492188	0.550282	0.738281	0.821521	0.984375	1.01467	1.23047	1.2648	1.43496	1.75396	2.48047	3.66237	5.50282	8.6781	16.5468
0	0	0	0.159407	0.246094	0.246094	0.348029	0.492188	0.550282	0.738281	0.852957	0.984375	1.01467	1.23047	1.2648	1.43496	1.75396	2.48047	3.663	5.5465	8.87439	16.6043
0	0	0	0.160357	0.246094	0.246094	0.348029	0.492188	0.550282	0.738281	0.887304	0.984375	1.01467	1.23047	1.31716	1.43496	1.75396	2.48047	3.68748	5.57416	8.9711	16.7298
0	0	0	0.164229	0.246094	0.246094	0.348029	0.492188	0.550282	0.738281	0.887304	0.984375	1.01467	1.23047	1.32324	1.43496	1.75396	2.48047	3.71365	5.57416	9.54578	16.8032
0	0	0	0.166398	0.246094	0.246094	0.348029	0.492188	0.550282	0.738281	0.887304	0.984375	1.01467	1.23047	1.32526	1.44635	1.75396	2.48099	3.7193	5.59619	10.0451	16.8032
0	0	0	0.167605	0.246094	0.246094	0.348029	0.492188	0.550282	0.738281	0.887304	0.984375	1.01467	1.23047	1.32526	1.44635	1.77461	2.49284	3.7207	5.62361	10.1971	16.8124
0	0	0	0.174965	0.246094	0.246094	0.348029	0.492188	0.550282	0.738281	0.887304	0.984375	1.04409	1.23047	1.32526	1.44635	1.77854	2.49284	3.72383	5.6278	11.0151	16.9726
0	0	0	0.182293	0.246094	0.246094	0.348029	0.492188	0.550282	0.738281	0.887304	0.984375	1.04409	1.23047	1.32526	1.44635	1.78869	2.49284	3.72896	5.66178	11.9707	17.2299
0	0	0	0.183191	0.246094	0.246094	0.348196	0.492188	0.550282	0.738281	0.887304	0.984375	1.04409	1.23047	1.32526	1.44635	1.79793	2.49284	3.742	5.66721	12.0934	18.1278
0	0	0	0.185836	0.246094	0.246094	0.350791	0.492188	0.550282	0.738281	0.887304	0.984375	1.10056	1.23047	1.32526	1.44635	1.82678	2.50351	3.74839	5.66721	12.2977	18.204
0	0	0	0.186175	0.246094	0.247119	0.350791	0.492188	0.550282	0.738281	0.887304	0.984375	1.10056	1.23047	1.32526	1.4661	1.83847	2.50967	3.74884	5.76942	12.9199	18.946
0	0	0	0.187826	0.246094	0.248047	0.350791	0.492188	0.550282	0.738281	0.887304	0.984375	1.10056	1.23047	1.32526	1.47656	1.87419	2.50967	3.76172	5.7854	12.9864	21.8507
0	0	0	0.189206	0.246094	0.248047	0.350791	0.492188	0.550282	0.738281	0.887304	0.984375	1.10056	1.23047	1.32526	1.47656	1.88907	2.53369	3.7657	5.7971	13.1066	22.2095
0	0	0	0.192097	0.246094	0.248047	0.350791	0.492188	0.550282	0.738281	0.887304	0.984375	1.10056	1.23047	1.32526	1.48402	1.92205	2.53369	3.78627	5.80663	13.1558	22.6172
0	0	0	0.194742	0.246094	0.248047	0.350791	0.492188	0.550282	0.738281	0.890233	0.992188	1.10056	1.23047	1.32526	1.48828	1.92205	2.53369	3.78627	5.81806	13.1558	22.8486
0	0	0	0.195627	0.246094	0.248047	0.350791	0.492188	0.550282	0.738281	0.925329	0.999303	1.10056	1.23047	1.32526	1.48828	1.92205	2.53369	3.83533	5.83987	13.3347	23.4912
0	0	0	0.19613	0.246094	0.248047	0.350791	0.492188	0.550282	0.738281	0.934911	1.01467	1.10056	1.23047	1.32526	1.49693	1.92205	2.53369	3.84411	5.85412	13.6223	23.4912
0	0	0	0.196555	0.246094	0.248047	0.350791	0.492188	0.550282	0.738281	0.955808	1.01467	1.10056	1.23047	1.32526	1.49693	1.92205	2.53369	3.85198	5.86512	13.6854	24.1371
0	0	0	0.201579	0.246094	0.248047	0.361699	0.492188	0.550282	0.738281	0.958166	1.01467	1.10056	1.23047	1.32526	1.49693	1.92205	2.53521	3.85571	5.86531	14.2168	24.1371
0	0	0	0.205835	0.246094	0.248047	0.364485	0.492188	0.550282	0.738281	0.984065	1.01467	1.10056	1.23047	1.32526	1.50881	1.92205	2.55168	3.8587	5.97318	14.3375	24.4612
0	0	0	0.206891	0.246094	0.248047	0.369899	0.492188	0.550282	0.738281	0.984375	1.01467	1.10056	1.23047	1.32526	1.50881	1.93731	2.5538	3.8587	5.99938	14.3889	24.4612
0	0	0	0.207737	0.246094	0.248047	0.372759	0.492188	0.550282	0.738281	0.984375	1.01467	1.10056	1.23047	1.32526	1.50881	1.93731	2.5538	3.86595	6.03146	14.4486	24.6567
0	0	0	0.209045	0.246094	0.248047	0.379092	0.492188	0.550282	0.744141	0.984375	1.01467	1.1093	1.23047	1.32526	1.50881	1.93731	2.5538	3.86647	6.03855	14.5589	27.5187
0	0	0	0.216518	0.246094	0.248047	0.38096	0.492188	0.550282	0.744141	0.984375	1.01467	1.15062	1.23047	1.32526	1.53656	1.93731	2.5538	3.86723	6.04034	14.5673	29.8688
0	0	0	0.217546	0.246094	0.248047	0.388895	0.492188	0.550282	0.744141	0.984375	1.01467	1.1807	1.23047	1.32526	1.55643	1.94576	2.55508	3.87462	6.06556	14.7708	32.1209
0	0	0	0.220683	0.246094	0.248047	0.404068	0.492188	0.550282	0.744141	0.984375	1.01467	1.19623	1.24023	1.32526	1.55643	1.96875	2.55608	3.87462	6.10115	14.9755	33.6339
0	0	0	0.220818	0.246094	0.248047	0.418289	0.492188	0.550282	0.744141	0.984375	1.01467	1.23047	1.24023	1.32605	1.55967	1.96875	2.56929	3.89108	6.12631	15.1207
0	0	0	0.221421	0.246094	0.248047	0.422603	0.492188	0.550282	0.744141	0.984375	1.02272	1.23047	1.24023	1.32761	1.56735	1.96875	2.5815	3.89108	6.12631	15.3087
0	0	0	0.222188	0.246094	0.248047	0.427643	0.492188	0.550282	0.744486	0.984375	1.02272	1.23047	1.24023	1.33577	1.57577	1.98438	2.58891	3.89108	6.12631	15.729
0	0	0	0.222475	0.246094	0.248047	0.43178	0.492188	0.55465	0.76861	0.984375	1.04409	1.23047	1.24023	1.33577	1.57577	1.98438	2.58969	3.89108	6.13634	15.8924
0	0	0	0.223	0.246094	0.248047	0.438986	0.492188	0.55465	0.778217	0.984375	1.04409	1.23047	1.24023	1.33577	1.57577	1.98438	2.58969	3.89108	6.14135	15.9985
0	0	0	0.223769	0.246094	0.248047	0.463306	0.492188	0.55465	0.778217	0.984375	1.04409	1.23047	1.24023	1.33577	1.57577	1.98438	2.58969	3.92162	6.15234	16.0944
0	0	0	0.224435	0.246094	0.248047	0.469819	0.492188	0.55465	0.778217	0.984375	1.04409	1.23047	1.24023	1.33577	1.57577	1.98438	2.61152	3.92197	6.15234	16.1593
0	0	0	0.225578	0.246094	0.248047	0.476196	0.492188	0.55465	0.778217	0.984375	1.04409	1.23047	1.24023	1.33577	1.57577	1.99982	2.61601	3.98015	6.15234	16.1916
0	0	0	0.228482	0.246094	0.248047	0.485142	0.492188	0.55465	0.778217	0.984375	1.04409	1.23047	1.24023	1.37787	1.57577	1.99982	2.631	3.98074	6.20117	16.1992
0	0	0	0.241761	0.246094	0.248047	0.487422	0.492188	0.55465	0.778217	0.984375	1.04409	1.23047	1.24023	1.39212	1.58827	2.0143	2.64676	3.99507	6.20117	16.2371
0	0	0	0.242111	0.246094	0.248047	0.492188	0.492188	0.55465	0.778217	0.984375	1.04409	1.23047	1.24023	1.39212	1.58827	2.03639	2.65051	4.02385	6.22098	16.3203
0	0	0	0.244276	0.246094	0.248047	0.492188	0.492188	0.55465	0.778217	0.984375	1.04409	1.23047	1.25484	1.39212	1.58827	2.03859	2.65051	4.03624	6.23828	16.4236
0	0	0	0.245237	0.246094	0.248047	0.492188	0.492188	0.55465	0.778217	0.984375	1.04409	1.23047	1.25484	1.39212	1.58827	2.04545	2.67155	4.03624	6.27418	17.135
0	0	0	0.246094	0.246094	0.248047	0.492188	0.492188	0.557091	0.778217	0.984375	1.05237	1.23047	1.25484	1.39212	1.58827	2.10607	2.67155	4.03624	6.27418	17.3367
0	0	0	0.246094	0.246094	0.248047	0.492188	0.492188	0.568721	0.778217	0.984375	1.05848	1.23047	1.25484	1.39212	1.58827	2.11055	2.67155	4.03791	6.27494	18.8074
0	0	0	0.246094	0.246094	0.248047	0.492188	0.492188	0.602105	0.784393	0.984375	1.07271	1.23047	1.25484	1.39212	1.58827	2.11698	2.67155	4.03791	6.32398	20.8743
0	0	0	0.246094	0.246094	0.248047	0.492188	0.492188	0.611738	0.784393	0.984375	1.07567	1.23047	1.25484	1.39212	1.59641	2.11698	2.67495	4.06827	6.32398	21.1931
0	0	0	0.246094	0.246094	0.248047	0.492188	0.492188	0.616353	0.784393	0.984375	1.10056	1.23047	1.25484	1.40317	1.60686	2.11698	2.68304	4.06827	6.33856	21.2815
0	0	0	0.246094	0.246094	0.248047	0.492188	0.492188	0.617215	0.784393	0.984375	1.10056	1.23047	1.25484	1.40317	1.62634	2.11698	2.68304	4.09089	6.3531	21.5815
0	0	0	0.246094	0.246094	0.248047	0.492188	0.492188	0.622244	0.789228	0.984375	1.10056	1.23047	1.25484	1.41437	1.63033	2.11698	2.68351	4.09582	6.43967	21.6029
0	0	0	0.246094	0.246094	0.248047	0.492188	0.492188	0.622244	0.789295	0.992188	1.10056	1.23047	1.25484	1.42006	1.65085	2.13143	2.70703	4.09892	6.44922	21.6952
0	0	0	0.246094	0.246094	0.248426	0.492188	0.492188	0.631439	0.798558	0.992188	1.10056	1.23047	1.25484	1.43496	1.65085	2.13187	2.71819	4.10591	6.46673	22.2483
0	0	0	0.246094	0.246094	0.256234	0.492188	0.496094	0.633778	0.801405	0.992188	1.10056	1.23047	1.25484	1.43496	1.66395	2.13378	2.72852	4.10591	6.46827	22.3861
0	0	0	0.246094	0.246094	0.266274	0.492188	0.496094	0.649873	0.839032	0.992188	1.10056	1.23047	1.25484	1.43496	1.72266	2.13378	2.72852	4.10919	6.48947	22.5723
0	0	0	0.246094	0.246094	0.267255	0.492188	0.496094	0.654609	0.840758	0.992188	1.10056	1.23047	1.25484	1.43496	1.72266	2.13378	2.72852	4.12528	6.50943	22.8014
0	0	0	0.246094	0.246094	0.267924	0.492188	0.496094	0.69197	0.843141	0.992188	1.10056	1.23047	1.25484	1.43496	1.73633	2.13378	2.73977	4.12528	6.55332	22.8014
0	0	0	0.246094	0.246094	0.269217	0.492188	0.496094	0.694876	0.853989	0.992188	1.10056	1.23047	1.25484	1.43496	1.73633	2.13378	2.73977	4.12551	6.59077	24.4914
0	0	0	0.246094	0.246094	0.282746	0.492188	0.496094	0.696058	0.860779	0.994855	1.10056	1.23047	1.25484	1.43496	1.73633	2.13378	2.73977	4.12832	6.62628	27.0564
0	0	0	0.246094	0.246094	0.290732	0.492188	0.496094	0.696058	0.887304	1.01378	1.1093	1.23047	1.25484	1.43496	1.73633	2.16154	2.75141	4.1423	6.67887	29.4435
0	0	0	0.246094	0.246094	0.306214	0.492188	0.496094	0.696058	0.887304	1.01467	1.1093	1.23047	1.25484	1.43496	1.73633	2.18023	2.75141	4.15802	6.72413	31.2982
0	0	0	0.246094	0.246094	0.30665	0.492188	0.496094	0.696058	0.887304	1.01467	1.1093	1.23047	1.25484	1.43496	1.73633	2.18293	2.75141	4.15802	6.7476	33.0638
0	0	0	0.246094	0.246094	0.312999	0.492188	0.496094	0.696058	0.887304	1.01467	1.1093	1.23047	1.2648	1.43496	1.73633	2.1847	2.76309	4.15974	6.77036
0	0	0	0.246094	0.246094	0.319465	0.492188	0.496094	0.696058	0.887304	1.01467	1.1093	1.23047	1.2648	1.43496	1.73633	2.18778	2.77325	4.16888	6.81113
0	0	0	0.246094	0.246094	0.335631	0.492188	0.496094	0.696058	0.887304	1.01467	1.14142	1.23047	1.2648	1.43496	1.73633	2.19207	2.77325	4.18999	6.84196
0	0	0	0.246094	0.246094	0.341102	0.492188	0.496094	0.696058	0.887304	1.01467	1.15641	1.23047	1.2648	1.43496	1.73633	2.20113	2.77325	4.2095	6.84268
0	0	0	0.246094	0.246094	0.341206	0.492188	0.496094	0.696058	0.887304	1.01467	1.15683	1.23047	1.2648	1.43496	1.74015	2.21437	2.80633	4.21423	6.87708
0	0	0	0.246094	0.246094	0.341373	0.492188	0.496094	0.696058	0.887304	1.01467	1.16223	1.23047	1.2648	1.43496	1.74015	2.21484	2.82121	4.2168	6.87855
0	0	0	0.246094	0.246094	0.348029	0.492188	0.496094	0.696058	0.887304	1.01467	1.17157	1.23047	1.2648	1.43496	1.74015	2.21484	2.82817	4.22409	6.87855
0	0	0	0.246094	0.246094	0.348029	0.492188	0.496094	0.696058	0.887304	1.01467	1.1721	1.23047	1.2648	1.43496	1.74015	2.21484	2.82817	4.22409	6.90979
0	0	0	0.246094	0.246094	0.348029	0.492188	0.496094	0.696058	0.887304	1.01467	1.18213	1.23047	1.31819	1.43496	1.74015	2.21484	2.87435	4.23396	6.90979
0	0	0	0.246094	0.246094	0.348029	0.492188	0.500079	0.701583	0.887304	1.01467	1.18227	1.23047	1.32526	1.44635	1.74015	2.2186	2.89383	4.23879	6.98949
0	0	0	0.246094	0.246094	0.348029	0.492188	0.504827	0.701583	0.887304	1.01467	1.18582	1.23047	1.32526	1.44635	1.74015	2.22847	2.90331	4.24588	7.05518
0	0	0	0.246094	0.246094	0.348029	0.492188	0.507736	0.707177	0.894346	1.01467	1.1925	1.23047	1.32526	1.44635	1.74015	2.23242	2.94865	4.25296	7.10731
0	0	0	0.246094	0.246094	0.348029	0.492188	0.526647	0.711937	0.894346	1.01467	1.19428	1.23047	1.32526	1.46674	1.74015	2.23242	2.95312	4.25716	7.14185
0	0	0	0.246094	0.246094	0.348029	0.492188	0.549859	0.718526	0.9263	1.01467	1.19574	1.23047	1.32526	1.47656	1.74015	2.23242	2.96336	4.26756	7.1748
0	0	0	0.246094	0.246094	0.348029	0.492188	0.550282	0.737269	0.946972	1.01467	1.19786	1.23047	1.32526	1.47656	1.74015	2.23242	2.96638	4.29784	7.21045
0	0	0	0.246094	0.246094	0.348029	0.492188	0.550282	0.738281	0.950929	1.01467	1.23047	1.23047	1.32526	1.47656	1.74015	2.24616	2.97356	4.32322	7.29528
0	0	0	0.246094	0.246094	0.348029	0.492188	0.550282	0.738281	0.958166	1.01467	1.23047	1.23047	1.32526	1.48828	1.74015	2.24616	2.98688	4.33905	7.38281
0	0	0	0.246094	0.246094	0.348029	0.492188	0.550282	0.738281	0.984375	1.01467	1.23047	1.23047	1.32526	1.48828	1.74015	2.24616	2.98688	4.33905	7.48465
0	0	0	0.246094	0.246094	0.348029	0.492188	0.550282	0.738281	0.984375	1.01467	1.23047	1.23047	1.32526	1.48828	1.74015	2.24616	2.98688	4.34578	7.53181
0	0	0	0.246094	0.246094	0.348029	0.492188	0.550282	0.738281	0.984375	1.0215	1.23047	1.23047	1.32526	1.48828	1.74015	2.26887	2.99512	4.3884	7.54405
0	0	0	0.246094	0.246094	0.348029	0.492188	0.550282	0.738281	0.984375	1.02272	1.23047	1.23047	1.32526	1.49693	1.74015	2.26887	2.99592	4.40226	7.5499
0	0	0	0.246094	0.246094	0.348029	0.492188	0.550282	0.738281	0.984375	1.02272	1.23047	1.23047	1.32526	1.49693	1.74015	2.28072	2.99716	4.40226	7.56035
0	0	0	0.246094	0.246094	0.348029	0.492188	0.550282	0.738281	0.984375	1.02272	1.23047	1.24023	1.32526	1.49693	1.74203	2.28605	3.00396	4.41635	7.57254
0	0	0	0.246094	0.246094	0.348029	0.492188	0.550282	0.738281	0.984375	1.02272	1.23047	1.24023	1.32526	1.49693	1.75396	2.28688	3.00396	4.42711	7.59283
0	0	0	0.246094	0.246094	0.348029	0.492188	0.550282	0.738281	0.984375	1.02272	1.23047	1.24023	1.32526	1.49693	1.75396	2.28688	3.01801	4.43652	7.70145
0	0	0	0.246094	0.246094	0.348029	0.492188	0.550282	0.738281	0.984375	1.02272	1.23047	1.24023	1.32526	1.50881	1.75396	2.28688	3.0278	4.44494	7.70544
0	0	0	0.246094	0.246094	0.348029	0.492188	0.550282	0.738281	0.984375	1.0255	1.23047	1.24023	1.32526	1.50881	1.75396	2.28688	3.0278	4.47173	7.78883
0	0	0	0.246094	0.246094	0.348029	0.492188	0.550282	0.738281	0.984375	1.03146	1.23047	1.24023	1.32526	1.50881	1.75396	2.29992	3.0278	4.50075	7.84393
0	0	0	0.246094	0.246094	0.350791	0.492188	0.550282	0.738281	0.984375	1.03433	1.23047	1.24023	1.32526	1.55643	1.75396	2.30247	3.0278	4.51017	7.87884
0	0	0	0.246094	0.246094	0.350791	0.492188	0.550282	0.738281	0.984375	1.04409	1.23047	1.24023	1.32526	1.55643	1.75396	2.31584	3.0278	4.51768	7.87915
0	0	0.0208484	0.246094	0.246094	0.350791	0.492188	0.550282	0.738281	0.984375	1.04409	1.23047	1.24023	1.32526	1.55643	1.77461	2.32164	3.04943	4.52603	7.94137
0	0	0.0349361	0.246094	0.246094	0.350791	0.492188	0.550282	0.738281	0.984375	1.04409	1.23047	1.24023	1.32526	1.56879	1.79159	2.32164	3.10126	4.53774	8.25424
0	0	0.0417384	0.246094	0.246094	0.350791	0.492188	0.550282	0.738281	0.984375	1.04409	1.23047	1.24023	1.32526	1.56879	1.79159	2.32164	3.15154	4.5527	8.43359
0	0	0.0514434	0.246094	0.246094	0.350791	0.492188	0.550282	0.738281	0.984375	1.04409	1.23047	1.24023	1.32526	1.57577	1.80581	2.32164	3.15712	4.55354	8.46636
0	0	0.0514439	0.246094	0.246094	0.350791	0.492188	0.550282	0.738281	0.984375	1.04409	1.23047	1.24023	1.32526	1.57577	1.80581	2.32164	3.15712	4.56029	8.49789
0	0	0.0528811	0.246094	0.246094	0.350791	0.492188	0.550282	0.738281	0.984375	1.04409	1.23047	1.24023	1.32526	1.57577	1.80581	2.32164	3.17655	4.56029	8.55312
0	0	0.0547998	0.246094	0.246094	0.350791	0.492188	0.550282	0.738281	0.984375	1.04409	1.23047	1.24023	1.32526	1.57577	1.80581	2.32164	3.17655	4.56029	8.70073
0	0	0.0665473	0.246094	0.246094	0.382463	0.492188	0.550282	0.738281	0.984375	1.04409	1.23047	1.24023	1.32756	1.57577	1.81162	2.32164	3.17655	4.57376	8.70073
0	0	0.0686576	0.246094	0.246094	0.38289	0.492188	0.550282	0.738281	0.984375	1.04409	1.23047	1.24244	1.32761	1.57577	1.82014	2.32164	3.17655	4.57694	8.70073
0	0	0.0803104	0.246094	0.246094	0.39247	0.492188	0.550282	0.738281	0.984375	1.04409	1.23047	1.25484	1.33577	1.57577	1.87213	2.32216	3.17655	4.57761	8.76978
0	0	0.0816539	0.246094	0.246094	0.40172	0.492188	0.550282	0.738281	0.984375	1.05237	1.23047	1.25484	1.33577	1.57577	1.87419	2.32315	3.2006	4.59267	8.87304
0	0	0.0878864	0.246094	0.246094	0.402268	0.496094	0.550282	0.738281	0.984375	1.05237	1.23047	1.25484	1.33577	1.57577	1.87651	2.33908	3.20867	4.61125	8.87439
0	0	0.0927924	0.246094	0.246094	0.404097	0.496094	0.550282	0.738281	0.984375	1.05237	1.23047	1.25484	1.33577	1.57577	1.89086	2.34007	3.20887	4.62157	9.02904
0	0	0.0951576	0.246094	0.246094	0.41196	0.496094	0.550282	0.738281	0.984375	1.07237	1.23047	1.25484	1.33577	1.57577	1.8972	2.34007	3.22461	4.6339	9.27089
0	0	0.0983406	0.246094	0.246094	0.416075	0.496094	0.55465	0.738281	0.984375	1.09704	1.23047	1.25484	1.3519	1.57577	1.92205	2.34007	3.22461	4.64329	9.37097
0	0	0.098504	0.246094	0.246094	0.417215	0.496094	0.55465	0.738281	0.984375	1.10056	1.23047	1.25484	1.36508	1.57577	1.92205	2.34007	3.23414	4.64329	9.44534
0	0	0.100096	0.246094	0.248047	0.438262	0.496094	0.55465	0.738281	0.984375	1.10056	1.23047	1.25484	1.39212	1.57577	1.92205	2.34007	3.26255	4.64329	9.44534
0	0	0.103136	0.246094	0.248047	0.441475	0.496094	0.55465	0.738281	0.984375	1.10056	1.23047	1.25484	1.39212	1.57577	1.92205	2.34007	3.30462	4.66038	9.68654
0	0	0.103483	0.246094	0.248047	0.450522	0.496094	0.55465	0.738281	0.984375	1.10056	1.23047	1.25484	1.39212	1.57577	1.92205	2.34538	3.31085	4.67506	9.92036
0	0	0.104663	0.246094	0.248047	0.483449	0.496094	0.55465	0.738281	0.992188	1.10056	1.23047	1.25484	1.39212	1.57577	1.92205	2.34575	3.3353	4.67578	9.92036
0	0	0.105283	0.246094	0.248047	0.48451	0.496094	0.55465	0.738281	0.992188	1.10056	1.23047	1.25484	1.39212	1.57577	1.92205	2.35318	3.33713	4.68225	9.92036
0	0	0.108927	0.246094	0.248047	0.485559	0.496094	0.55465	0.738281	0.992188	1.10056	1.23047	1.25484	1.39212	1.57577	1.92205	2.35318	3.33713	4.69143	9.97753
0	0	0.109287	0.246094	0.248047	0.486276	0.496094	0.55465	0.744141	0.992188	1.10056	1.23047	1.25484	1.39212	1.57577	1.92205	2.36896	3.3396	4.69899	9.99909
0	0	0.111443	0.246094	0.248047	0.492188	0.496094	0.55465	0.744141	0.992188	1.10056	1.23047	1.25484	1.39212	1.58214	1.92205	2.40087	3.35772	4.72202	10.1467
0	0	0.115112	0.246094	0.248047	0.492188	0.496094	0.55465	0.744141	0.992188	1.10056	1.23047	1.25484	1.39212	1.58827	1.92205	2.41152	3.3738	4.72221	10.6689
0	0	0.115231	0.246094	0.248047	0.492188	0.496094	0.556683	0.744141	0.992188	1.10056	1.23047	1.25484	1.39212	1.58827	1.93731	2.42772	3.3738	4.72731	10.6689
0	0	0.116225	0.246094	0.248047	0.492188	0.496094	0.568369	0.744141	0.992188	1.10056	1.23047	1.25484	1.39212	1.58827	1.93731	2.4362	3.37961	4.72731	10.735
0	0	0.117554	0.246094	0.248047	0.492188	0.496094	0.568538	0.751466	0.992188	1.10056	1.23047	1.25484	1.40317	1.58827	1.93731	2.44145	3.37995	4.72731	11.1695
0	0	0.119832	0.246094	0.248047	0.492188	0.496094	0.596883	0.778217	0.992188	1.10056	1.23047	1.25484	1.40317	1.59709	1.93731	2.44298	3.38482	4.72893	11.1924
0	0	0.121442	0.246094	0.248047	0.492188	0.496094	0.600918	0.778217	0.994855	1.10056	1.23047	1.25484	1.4212	1.63562	1.94348	2.44298	3.40394	4.74454	11.2308
0	0	0.123342	0.246094	0.248047	0.492188	0.496094	0.605748	0.778217	1.01389	1.10056	1.23047	1.25484	1.42131	1.65085	1.95156	2.46094	3.43827	4.75336	11.3371
0	0	0.129012	0.246094	0.248047	0.492188	0.496094	0.615969	0.778217	1.01467	1.10056	1.23047	1.25484	1.43496	1.65085	1.96875	2.46094	3.44531	4.76005	11.3444
0	0	0.131901	0.246094	0.248047	0.492188	0.496094	0.622244	0.778217	1.01467	1.10056	1.23047	1.25484	1.43496	1.65085	1.96875	2.46094	3.45409	4.76019	11.3444
0	0	0.137688	0.246094	0.248047	0.492188	0.496094	0.622244	0.778217	1.01467	1.10056	1.23047	1.25484	1.43496	1.65085	1.96875	2.46094	3.48029	4.76482	11.5505
0	0	0.13798	0.246094	0.248047	0.492188	0.499893	0.628009	0.778217	1.01467	1.10056	1.23047	1.25484	1.43496	1.65085	1.97431	2.47321	3.48163	4.76994	11.5814
0	0	0.144572	0.246094	0.248047	0.492188	0.505223	0.631439	0.778217	1.01467	1.10056	1.23047	1.25484	1.43496	1.66133	1.97656	2.47321	3.50791	4.77128	11.6582
0	0	0.149592	0.246094	0.248047	0.492188	0.533666	0.634898	0.778217	1.01467	1.10056	1.23047	1.25484	1.43496	1.66395	1.98195	2.47321	3.52249	4.77828	11.7003
0	0	0.159197	0.246094	0.248047	0.492188	0.534235	0.64335	0.778217	1.01467	1.10056	1.23047	1.25484	1.43496	1.66395	1.98407	2.47321	3.52353	4.79058	11.7633
0	0	0.159987	0.246094	0.248047	0.492188	0.534621	0.645257	0.778217	1.01467	1.1093	1.23047	1.2648	1.43496	1.66395	1.98407	2.47321	3.52541	4.79058	11.7633
0	0	0.161311	0.246094	0.248047	0.492188	0.538206	0.645477	0.778217	1.01467	1.1093	1.23047	1.2648	1.43496	1.66395	1.98407	2.47321	3.55149	4.79058	12.181
0	0	0.161734	0.246094	0.248047	0.492188	0.53953	0.647786	0.778217	1.01467	1.1093	1.23047	1.2648	1.43496	1.66849	1.98407	2.48047	3.55149	4.80979	12.2777
0	0	0.163386	0.246094	0.248047	0.492188	0.545103	0.649873	0.778217	1.01467	1.1093	1.23047	1.2648	1.43496	1.67543	1.98407	2.48047	3.55315	4.81001	12.2827
0	0	0.165463	0.246094	0.248047	0.492188	0.550282	0.662028	0.778217	1.01467	1.11609	1.23047	1.2648	1.43496	1.69276	1.98438	2.48047	3.57738	4.81035	12.3661
0	0	0.166312	0.246094	0.248047	0.492188	0.550282	0.676388	0.778217	1.02155	1.12136	1.23047	1.2648	1.43496	1.70656	1.98438	2.48047	3.57738	4.8162	12.5233
0	0	0.168943	0.246094	0.248047	0.492188	0.550282	0.684546	0.778217	1.02272	1.12232	1.23047	1.2648	1.43496	1.70984	1.98438	2.48047	3.57738	4.83498	12.5484
0	0	0.170788	0.246094	0.248047	0.492188	0.550282	0.685371	0.778217	1.02272	1.13126	1.23919	1.2648	1.43496	1.72266	1.98438	2.48047	3.58006	4.83498	12.5943
0	0	0.171274	0.246094	0.248047	0.492188	0.550282	0.692615	0.778217	1.02272	1.1439	1.24023	1.2648	1.43496	1.72266	1.98438	2.48047	3.59989	4.83498	12.8051
0	0	0.175532	0.246094	0.248047	0.492188	0.550282	0.694876	0.78185	1.02272	1.14842	1.24023	1.2648	1.43496	1.72266	1.98438	2.49284	3.60467	4.83867	12.8051
0	0	0.178643	0.246094	0.248047	0.492188	0.550282	0.696058	0.784393	1.02272	1.15641	1.24023	1.2648	1.43496	1.72266	1.99225	2.49284	3.62075	4.85302	13.0826
0	0	0.179316	0.246094	0.248047	0.492188	0.550282	0.696058	0.784393	1.02272	1.16292	1.24023	1.2648	1.43496	1.72266	1.99668	2.50131	3.6265	4.85373	13.2264
0	0	0.179368	0.246094	0.248047	0.492188	0.550282	0.696058	0.784393	1.02272	1.16349	1.24023	1.2648	1.43496	1.72266	1.99982	2.50267	3.65638	4.87335	13.2526
0	0	0.181289	0.246094	0.248047	0.492188	0.550282	0.696058	0.784393	1.02272	1.17472	1.24023	1.27264	1.43496	1.73492	1.99982	2.50351	3.65788	4.89225	13.2526
0	0	0.184133	0.246094	0.248047	0.492188	0.550282	0.696058	0.784393	1.04409	1.17537	1.24023	1.29376	1.43807	1.73633	1.99982	2.52609	3.65845	4.90338	13.3347
0	0	0.18611	0.246094	0.248047	0.492188	0.550282	0.696058	0.789261	1.04409	1.17578	1.24023	1.31383	1.44635	1.73633	1.99982	2.53369	3.65845	4.9106	13.4152
0	0	0.186814	0.246094	0.248047	0.492188	0.550282	0.696058	0.793186	1.04409	1.19306	1.24023	1.32324	1.44635	1.73633	1.99982	2.53369	3.66237	4.92802	13.4998
0	0	0.1947	0.246094	0.248047	0.492188	0.550282	0.696058	0.795837	1.04409	1.19786	1.24023	1.32526	1.44635	1.73633	1.99982	2.53369	3.66237	4.9423	13.5066
0	0	0.197638	0.246094	0.248047	0.492188	0.550282	0.696058	0.839124	1.04409	1.20786	1.24023	1.32526	1.44635	1.73633	1.99982	2.53369	3.68748	4.9423	13.6854
0	0	0.200364	0.246094	0.248047	0.492188	0.550282	0.696058	0.843141	1.04409	1.23047	1.24023	1.32526	1.44635	1.74015	1.99982	2.53369	3.68748	4.9587	13.9701
0	0	0.205979	0.246094	0.248047	0.492188	0.550282	0.696058	0.844185	1.04409	1.23047	1.24023	1.32526	1.44635	1.74015	2.00176	2.5538	3.68748	4.96094	14.1016
0	0	0.214953	0.246094	0.248047	0.492188	0.550282	0.698869	0.84862	1.04409	1.23047	1.24023	1.32526	1.47656	1.74015	2.02927	2.5538	3.68748	4.97694	14.1133
0	0	0.216049	0.246094	0.248047	0.492188	0.550282	0.699461	0.857082	1.04409	1.23047	1.24023	1.32526	1.47656	1.74015	2.03639	2.5538	3.68748	4.99185	14.1408
0	0	0.21618	0.246094	0.248047	0.492188	0.550282	0.70157	0.861446	1.04409	1.23047	1.24023	1.32526	1.47656	1.74015	2.04545	2.56929	3.712	4.99185	14.1408
0	0	0.218963	0.246094	0.248047	0.492188	0.550282	0.701583	0.862376	1.04409	1.23047	1.24023	1.32526	1.47656	1.74015	2.05904	2.56929	3.7207	4.99185	14.2168
0	0	0.220983	0.246094	0.248047	0.492188	0.550282	0.701583	0.866707	1.05183	1.23047	1.24023	1.32526	1.47656	1.74015	2.06395	2.58011	3.73095	5.01935	14.4316
0	0	0.222052	0.246094	0.248047	0.492188	0.550282	0.701583	0.877096	1.05237	1.23047	1.24023	1.32526	1.47656	1.74015	2.06711	2.58133	3.74839	5.0261	14.5842
0	0	0.223999	0.246094	0.248047	0.492188	0.550282	0.701583	0.887304	1.05237	1.23047	1.24023	1.32526	1.47656	1.74015	2.0759	2.58428	3.75363	5.07335	14.7499
0	0	0.225751	0.246094	0.248047	0.492188	0.550282	0.701583	0.887304	1.05237	1.23047	1.24023	1.32526	1.47963	1.74015	2.08689	2.58969	3.76083	5.07335	14.9179
0	0	0.22636	0.246094	0.254992	0.492188	0.550282	0.718511	0.887304	1.05857	1.23047	1.24023	1.32526	1.48828	1.74015	2.08817	2.58969	3.76451	5.11362	14.9344
0	0	0.228832	0.246094	0.256217	0.492188	0.550282	0.72021	0.887304	1.06087	1.23047	1.24023	1.32526	1.48828	1.74015	2.08817	2.58969	3.77814	5.11362	15.0198
0	0	0.229396	0.246094	0.257471	0.492188	0.550282	0.72791	0.887304	1.08148	1.23047	1.24023	1.32526	1.48828	1.74015	2.09457	2.6021	3.78627	5.11362	15.0677
0	0	0.232202	0.246094	0.259391	0.492188	0.550282	0.738281	0.887304	1.09139	1.23047	1.24088	1.32526	1.48828	1.75396	2.10263	2.61601	3.79439	5.13859	15.0881
0	0	0.233987	0.246094	0.263744	0.492188	0.550282	0.738281	0.887304	1.09704	1.23047	1.25328	1.32526	1.48977	1.75396	2.10475	2.61601	3.79555	5.15534	15.0881
0	0	0.234753	0.246094	0.265872	0.492188	0.550282	0.738281	0.887304	1.10054	1.23047	1.25484	1.32526	1.49443	1.75396	2.10475	2.61601	3.80551	5.16152	15.1491
0	0	0.234986	0.246094	0.266339	0.492188	0.550282	0.738281	0.887304	1.10056	1.23047	1.25484	1.32526	1.49693	1.75396	2.10607	2.61601	3.81327	5.16839	15.2039
0	0	0.235585	0.246094	0.2678	0.492188	0.550282	0.738281	0.887304	1.10056	1.23047	1.25484	1.32526	1.49693	1.75396	2.11698	2.62455	3.81337	5.19135	15.2302
0	0	0.236694	0.246094	0.27021	0.492188	0.550282	0.738281	0.887304	1.10056	1.23047	1.25484	1.32526	1.49693	1.75396	2.11698	2.63279	3.8204	5.19336	15.3869
0	0	0.236921	0.246094	0.276009	0.492188	0.550282	0.738281	0.887304	1.10056	1.23047	1.25484	1.32526	1.49693	1.75396	2.11698	2.63669	3.8204	5.20734	15.4177
0	0	0.238945	0.246094	0.2765	0.492188	0.550282	0.738281	0.887304	1.10056	1.23047	1.25484	1.32526	1.49693	1.75396	2.11698	2.63677	3.82249	5.21489	15.4766
0	0	0.24034	0.246094	0.277979	0.492188	0.550282	0.738281	0.887304	1.10056	1.23047	1.25484	1.32526	1.49693	1.75396	2.11698	2.63677	3.83334	5.21489	15.5342
0	0	0.241439	0.246094	0.28072	0.492188	0.55465	0.738281	0.887304	1.10056	1.23047	1.25484	1.32526	1.50582	1.75396	2.11698	2.649	3.83415	5.22044	15.5401
0	0	0.246094	0.246094	0.281041	0.492188	0.55465	0.738281	0.887304	1.10056	1.23047	1.25484	1.32526	1.50611	1.75396	2.11698	2.64952	3.83784	5.23255	15.6427
0	0	0.246094	0.246094	0.285947	0.492188	0.55465	0.738281	0.890738	1.10056	1.23047	1.25484	1.32526	1.50881	1.75396	2.11698	2.65051	3.84411	5.24577	15.6427
0	0	0.246094	0.246094	0.286808	0.492188	0.55465	0.738281	0.891729	1.10056	1.23047	1.25484	1.32526	1.50881	1.75396	2.11931	2.65051	3.85198	5.26088	15.6879
0	0	0.246094	0.246094	0.28919	0.492188	0.55465	0.738281	0.894346	1.10056	1.23047	1.25484	1.32526	1.50881	1.75396	2.13378	2.65907	3.8587	5.26187	15.7577
0	0	0.246094	0.246094	0.291478	0.492188	0.55465	0.738281	0.894346	1.10056	1.23047	1.25484	1.32526	1.5211	1.75396	2.13378	2.66191	3.8587	5.27163	15.8924
0	0	0.246094	0.246094	0.296382	0.492188	0.55465	0.738281	0.894346	1.10056	1.23047	1.25484	1.32526	1.52768	1.7654	2.13378	2.66191	3.86885	5.29763	16.123
0	0	0.246094	0.246094	0.30135	0.492188	0.55465	0.738281	0.894346	1.10056	1.23047	1.25484	1.32526	1.54083	1.77307	2.13378	2.66191	3.87462	5.30102	16.1402
0	0	0.246094	0.246094	0.304021	0.492188	0.55465	0.738281	0.894346	1.10056	1.23047	1.25484	1.32526	1.54852	1.77461	2.13378	2.67155	3.87462	5.31576	16.2598
0	0	0.246094	0.246094	0.313067	0.492188	0.55465	0.738281	0.906589	1.10056	1.23047	1.25484	1.32526	1.55643	1.77461	2.13378	2.67155	3.87462	5.34309	16.3203
0	0	0.246094	0.246094	0.330934	0.492188	0.55465	0.738281	0.914012	1.10056	1.23047	1.25484	1.32526	1.55643	1.78869	2.13378	2.67155	3.89108	5.3869	16.4165
0	0	0.246094	0.246094	0.34309	0.492188	0.55465	0.738281	0.923201	1.10056	1.23047	1.25484	1.32526	1.55643	1.79159	2.13378	2.70703	3.89108	5.40286	17.2266
0	0	0.246094	0.246094	0.345344	0.492188	0.55465	0.738281	0.947655	1.10056	1.23047	1.25484	1.32526	1.55967	1.79159	2.13378	2.71819	3.89108	5.41965	17.8869
0	0	0.246094	0.246094	0.346185	0.492188	0.55465	0.738281	0.953138	1.10056	1.23047	1.25484	1.32868	1.56555	1.79159	2.13378	2.72852	3.89108	5.44009	18.1805
0	0	0.246094	0.246094	0.348029	0.492188	0.55465	0.738281	0.958166	1.10056	1.23047	1.25484	1.33166	1.56702	1.79159	2.1413	2.72852	3.92197	5.44574	18.5173
0	0	0.246094	0.246094	0.348029	0.492188	0.560725	0.738281	0.964942	1.10056	1.23047	1.25484	1.33577	1.56879	1.79159	2.1576	2.72852	3.93245	5.50282	18.6035
0	0	0.246094	0.246094	0.348029	0.492188	0.567706	0.738281	0.96529	1.10056	1.23047	1.25484	1.33577	1.56879	1.79172	2.16153	2.72852	3.93447	5.50282	19.102
0	0	0.246094	0.246094	0.348029	0.492188	0.587422	0.738281	0.965658	1.10056	1.23047	1.25484	1.33577	1.57222	1.79382	2.16577	2.73378	3.9375	5.51195	19.8577
0	0	0.246094	0.246094	0.348029	0.492188	0.596281	0.738281	0.9728	1.10471	1.23047	1.25484	1.33577	1.57577	1.79793	2.16663	2.73977	3.94518	5.5465	20.0005
0	0	0.246094	0.246094	0.348029	0.492188	0.598423	0.738281	0.984375	1.1053	1.23047	1.25484	1.33577	1.57577	1.80204	2.168	2.75141	3.96814	5.5465	20.0059
0	0	0.246094	0.246094	0.348029	0.492188	0.598809	0.738281	0.984375	1.1093	1.23047	1.25484	1.33577	1.57577	1.80351	2.16987	2.75141	3.96816	5.56242	20.0366
0	0	0.246094	0.246094	0.348029	0.492188	0.599615	0.738281	0.984375	1.1093	1.23047	1.25484	1.33577	1.57577	1.80921	2.17732	2.75141	3.99964	5.56847	20.13
0	0	0.246094	0.246094	0.348029	0.492188	0.602105	0.738281	0.984375	1.1093	1.23047	1.25484	1.33577	1.57577	1.8235	2.18422	2.75141	4.00612	5.57416	20.1774
0	0	0.246094	0.246094	0.348029	0.492188	0.604123	0.738281	0.984375	1.1093	1.23047	1.25484	1.33959	1.57577	1.83059	2.1847	2.75141	4.02248	5.57416	20.4545
0	0	0.246094	0.246094	0.348029	0.492188	0.617653	0.738281	0.984375	1.1093	1.23047	1.25484	1.34349	1.57577	1.83115	2.18724	2.75141	4.03624	5.59335	20.498
0	0	0.246094	0.246094	0.348029	0.492188	0.622244	0.738281	0.984375	1.1093	1.23047	1.25484	1.3442	1.57577	1.83847	2.19498	2.75141	4.03791	5.59619	20.6833
0	0	0.246094	0.246094	0.348029	0.492685	0.627031	0.738281	0.984375	1.12066	1.23047	1.25484	1.3469	1.57577	1.83933	2.19988	2.75832	4.06012	5.61071	20.9126
0	0	0.246094	0.246094	0.348029	0.496094	0.634898	0.738281	0.984375	1.13515	1.23047	1.25484	1.36752	1.57577	1.84313	2.21153	2.77325	4.07205	5.62736	20.918
0	0	0.246094	0.246094	0.348029	0.496094	0.644686	0.738281	0.984375	1.13874	1.23047	1.25484	1.36804	1.57577	1.85113	2.21484	2.77325	4.07673	5.6655	20.9541
0	0	0.246094	0.246094	0.348029	0.496094	0.65177	0.738281	0.984375	1.13884	1.23047	1.25484	1.37892	1.57577	1.85533	2.21484	2.77325	4.09089	5.66721	21.0263
0	0	0.246094	0.248047	0.348029	0.496094	0.658808	0.738281	0.984375	1.14056	1.23047	1.25484	1.39212	1.57577	1.85681	2.21484	2.77325	4.09582	5.66721	21.0504
0	0	0.246094	0.248047	0.348029	0.496094	0.664259	0.738281	0.984375	1.14605	1.23047	1.25484	1.39212	1.57577	1.86477	2.21484	2.77325	4.10591	5.66721	21.1423
0	0	0.246094	0.248047	0.348029	0.496094	0.671071	0.738281	0.984375	1.15028	1.23047	1.25484	1.39212	1.57577	1.86987	2.21612	2.77325	4.10591	5.68152	21.3983
0	0	0.246094	0.248047	0.348029	0.496094	0.678286	0.738281	0.984375	1.15641	1.23047	1.25484	1.39212	1.57577	1.87213	2.2186	2.77645	4.12528	5.68152	22.0113
0	0	0.246094	0.248047	0.348029	0.496094	0.684546	0.738281	0.984375	1.15768	1.23047	1.25484	1.39501	1.57577	1.87419	2.22847	2.78423	4.12528	5.69312	22.1826
0	0	0.246094	0.248047	0.348029	0.496094	0.685038	0.738281	0.984375	1.16176	1.23047	1.25484	1.39753	1.57577	1.87419	2.22847	2.79878	4.12528	5.71047	22.1826
0	0	0.246094	0.248047	0.348029	0.496094	0.686396	0.738281	0.984375	1.1664	1.23047	1.25484	1.39939	1.57577	1.87419	2.23168	2.80633	4.12832	5.7231	22.6219
0	0	0.246094	0.248047	0.348029	0.496094	0.690319	0.744141	0.984375	1.16719	1.23047	1.25484	1.40317	1.57577	1.87419	2.23242	2.80633	4.15802	5.72399	22.6219
0	0	0.246094	0.248047	0.348334	0.496094	0.692615	0.744141	0.984375	1.17301	1.23047	1.25484	1.40317	1.57577	1.87419	2.23242	2.81705	4.18359	5.72586	22.7677
0	0	0.246094	0.248047	0.349578	0.496094	0.696058	0.744141	0.984375	1.17532	1.23047	1.25484	1.40317	1.57577	1.87548	2.23242	2.82817	4.19009	5.72661	23.1184
0	0	0.246094	0.248047	0.350791	0.496094	0.696058	0.744141	0.984375	1.18038	1.23047	1.25484	1.41678	1.57577	1.88907	2.23242	2.82817	4.19083	5.80663	23.6685
0	0	0.246094	0.248047	0.350791	0.496094	0.696058	0.744141	0.984375	1.18632	1.23047	1.25484	1.4212	1.57577	1.88907	2.23242	2.82817	4.20418	5.81192	23.6685
0	0	0.246094	0.248047	0.350791	0.496094	0.696058	0.744141	0.984375	1.19008	1.23047	1.25484	1.428	1.57577	1.89086	2.23783	2.82817	4.21428	5.83833	24.035
0	0	0.246094	0.248047	0.350791	0.496094	0.696058	0.744141	0.984375	1.19458	1.23047	1.25484	1.43374	1.57577	1.89149	2.24616	2.88177	4.2168	5.88033	24.1749
0	0	0.246094	0.248047	0.350791	0.496094	0.696058	0.744141	0.984375	1.2009	1.23084	1.2553	1.43453	1.57802	1.89453	2.24616	2.88806	4.22409	5.88731	24.5169
0	0	0.246094	0.248047	0.350791	0.496094	0.696058	0.744141	0.984375	1.20871	1.23403	1.2648	1.43496	1.5874	1.90298	2.24616	2.8927	4.23221	5.88889	24.6094
0	0	0.246094	0.248047	0.350791	0.496094	0.696058	0.744141	0.984375	1.21086	1.23919	1.2648	1.43496	1.58827	1.92026	2.26053	2.8927	4.23396	5.89601	24.7627
0	0	0.246094	0.248047	0.350791	0.496094	0.696058	0.744141	0.984375	1.22945	1.24023	1.2648	1.43496	1.58827	1.92205	2.26887	2.90331	4.23396	5.92153	26.6463
0	0	0.246094	0.248047	0.350791	0.496094	0.696058	0.744141	0.984375	1.23047	1.24023	1.2648	1.43496	1.58827	1.92205	2.26887	2.95312	4.23446	5.94236	28.1129
0	0	0.246094	0.248047	0.350791	0.496094	0.696058	0.744141	0.984375	1.23047	1.24023	1.2648	1.43496	1.58827	1.92205	2.26887	2.96336	4.23863	5.94712	28.6277
0	0	0.246094	0.248047	0.350791	0.496094	0.696058	0.744141	0.984375	1.23047	1.24023	1.2648	1.43496	1.58827	1.92205	2.27272	2.97356	4.24239	5.95474	29.5312
0	0	0.246094	0.248047	0.350791	0.496094	0.696058	0.749046	0.984375	1.23047	1.24023	1.2648	1.43496	1.58827	1.92205	2.27427	2.97356	4.24824	5.96345	29.5842
0	0	0.246094	0.248047	0.350791	0.507519	0.696058	0.750448	0.984375	1.23047	1.24023	1.2648	1.43496	1.58827	1.92205	2.28688	2.97656	4.26756	5.97376	30.7308
0	0	0.246094	0.248047	0.350791	0.50993	0.696058	0.751425	0.984375	1.23047	1.24023	1.2648	1.43496	1.58827	1.92205	2.28688	2.98688	4.26756	5.98772	31.0556
0	0	0.246094	0.248047	0.350791	0.514005	0.697702	0.757118	0.984375	1.23047	1.24023	1.2648	1.43496	1.5952	1.92205	2.28688	2.98688	4.26909	6.03306	31.1049
0	0	0.246094	0.248047	0.350791	0.514097	0.699238	0.767602	0.992188	1.23047	1.24023	1.2648	1.43496	1.59696	1.92205	2.28688	2.98688	4.28113	6.03306	31.7547
0	0	0.246094	0.248047	0.350791	0.532526	0.701583	0.770988	0.992188	1.23047	1.24023	1.2648	1.43496	1.59844	1.92205	2.28897	2.98688	4.28349	6.0556	32.0867
0	0	0.246094	0.248047	0.350791	0.540763	0.701583	0.772199	0.992188	1.23047	1.24023	1.27028	1.43496	1.61111	1.92205	2.32164	2.99716	4.31669	6.07807	32.2983
0	0	0.246094	0.248047	0.350791	0.541754	0.701583	0.775586	0.992188	1.23047	1.24023	1.28354	1.43496	1.61326	1.92205	2.32164	3.01118	4.32035	6.0793	32.5027
0	0	0.246094	0.248047	0.350791	0.550282	0.701583	0.778217	0.992188	1.23047	1.24023	1.2952	1.43496	1.61494	1.92205	2.32164	3.0278	4.32565	6.08094	34.6503
0	0	0.246094	0.248047	0.350824	0.550282	0.701583	0.778217	0.992188	1.23047	1.24023	1.30992	1.43496	1.62852	1.92205	2.32164	3.0278	4.33195	6.08802	34.8247
0	0	0.246094	0.248047	0.353045	0.550282	0.701583	0.778217	0.992188	1.23047	1.24023	1.31895	1.43496	1.62873	1.92205	2.32164	3.04366	4.33905	6.09068	34.9981
0	0	0.246094	0.248047	0.354444	0.550282	0.701583	0.778217	0.992188	1.23047	1.24023	1.32324	1.43496	1.63156	1.92205	2.32164	3.04499	4.33905	6.10115	35.2567
0	0	0.246094	0.248047	0.358722	0.550282	0.707897	0.778217	0.992188	1.23047	1.24023	1.32526	1.43496	1.63966	1.92205	2.32164	3.05544	4.3492	6.14135	35.6836
0	0	0.246094	0.248047	0.359365	0.550282	0.708982	0.778217	0.992188	1.23047	1.24023	1.32526	1.43496	1.64697	1.92205	2.32164	3.10802	4.38157	6.15234	35.874
0	0	0.246094	0.248047	0.360088	0.550282	0.710952	0.778217	0.992188	1.23047	1.24023	1.32526	1.43496	1.65085	1.92475	2.32164	3.10802	4.3954	6.15234	38.6375
0	0	0.246094	0.248047	0.360906	0.550282	0.712804	0.778217	0.992188	1.23047	1.24023	1.32526	1.43496	1.65085	1.93182	2.32164	3.11197	4.3954	6.16136	39.3942
0	0	0.246094	0.248047	0.369169	0.550282	0.713895	0.778217	0.992188	1.23047	1.24023	1.32526	1.43496	1.65085	1.93731	2.32164	3.11287	4.3954	6.16709	39.5711
0	0	0.246094	0.248047	0.389624	0.550282	0.718045	0.778217	0.992188	1.23047	1.24023	1.32526	1.43496	1.66395	1.93731	2.32164	3.12336	4.40226	6.172	41.8359
0	0	0.246094	0.248047	0.400713	0.550282	0.71896	0.778217	0.992188	1.23047	1.24023	1.32526	1.43496	1.66395	1.93731	2.34007	3.13226	4.40226	6.17369	41.9985
0	0	0.246094	0.248047	0.40899	0.550282	0.72021	0.778217	0.992188	1.23047	1.24023	1.32526	1.43496	1.66395	1.93731	2.34007	3.13757	4.41635	6.19648	44.3652
0	0	0.246094	0.248047	0.40992	0.550282	0.725254	0.778217	0.992188	1.23047	1.24023	1.32526	1.43496	1.66395	1.93731	2.35318	3.17655	4.41635	6.19648	45.1265
0	0	0.246094	0.248047	0.414002	0.550282	0.735194	0.778217	0.992188	1.23047	1.24023	1.32526	1.43496	1.6677	1.93731	2.38599	3.17655	4.42969	6.19648	47.1608
0	0	0.246094	0.248047	0.414681	0.550282	0.738281	0.778217	0.99334	1.23047	1.24023	1.32526	1.43496	1.68468	1.93731	2.40757	3.17655	4.42969	6.20117	48.5529
0	0.00538467	0.246094	0.248047	0.421631	0.550282	0.738281	0.778217	0.993678	1.23047	1.24023	1.32526	1.43496	1.68622	1.93731	2.41865	3.17655	4.43652	6.20117	48.8482
0	0.016388	0.246094	0.248047	0.422971	0.550282	0.738281	0.778217	0.99766	1.23047	1.24023	1.32526	1.43496	1.72266	1.95436	2.42374	3.17859	4.43652	6.22098	48.9875
0	0.0597443	0.246094	0.248047	0.423887	0.550282	0.738281	0.778217	0.998874	1.23047	1.24023	1.32526	1.43496	1.72266	1.96384	2.4362	3.18489	4.43652	6.22098	50.5841
0	0.0602076	0.246094	0.248047	0.42748	0.550282	0.738281	0.778387	1.0009	1.23047	1.24923	1.32526	1.43496	1.72266	1.96809	2.44298	3.20695	4.4372	6.22098	50.629
0	0.0624174	0.246094	0.248047	0.428623	0.550282	0.738281	0.781555	1.00312	1.23047	1.25484	1.32526	1.43496	1.72266	1.96875	2.44298	3.22461	4.4372	6.22573	52.4647
0	0.0644713	0.246094	0.248047	0.4385	0.550282	0.738281	0.784393	1.01012	1.23047	1.25484	1.32526	1.43496	1.72266	1.96875	2.44298	3.23414	4.4409	6.25901	52.9245
0	0.0652025	0.246094	0.248047	0.443457	0.550282	0.738281	0.784393	1.01467	1.23047	1.25484	1.32526	1.43496	1.72266	1.97431	2.44298	3.23686	4.45491	6.26042	57.3589
0	0.0658236	0.246094	0.248047	0.444059	0.550282	0.738281	0.784393	1.01467	1.23047	1.25484	1.32526	1.44635	1.72266	1.97656	2.46094	3.23686	4.45644	6.27418	58.3663
0	0.0669385	0.246094	0.248047	0.449058	0.550282	0.738281	0.784393	1.01467	1.23047	1.25484	1.32526	1.44635	1.7236	1.98077	2.46094	3.26255	4.45695	6.32398	59.3821
0	0.0669521	0.246094	0.248047	0.450273	0.550282	0.738281	0.784393	1.01467	1.23047	1.25484	1.32526	1.44635	1.73163	1.98407	2.46094	3.2833	4.47173	6.33856	66.9108
0	0.0674401	0.246094	0.248047	0.450498	0.550282	0.738281	0.784393	1.01467	1.23047	1.25484	1.32526	1.44635	1.73633	1.98407	2.46094	3.31252	4.47173	6.33856	71.748
0	0.0683074	0.246094	0.248047	0.454801	0.550282	0.738281	0.786895	1.01467	1.23047	1.25484	1.32526	1.44635	1.73633	1.98407	2.46094	3.33713	4.47173	6.35312	77.948
0	0.0745645	0.246094	0.248047	0.455806	0.550282	0.738281	0.793184	1.01467	1.23047	1.25484	1.32526	1.44635	1.73633	1.98407	2.46094	3.33713	4.49282	6.35794	86.2119
0	0.0758563	0.246094	0.248047	0.459722	0.550282	0.738281	0.807816	1.01467	1.23047	1.25484	1.32526	1.44635	1.73633	1.98407	2.47321	3.34724	4.50062	6.35794
0	0.0768207	0.246094	0.248047	0.464335	0.550282	0.738281	0.822864	1.01467	1.23047	1.25484	1.32526	1.44635	1.73633	1.98407	2.47321	3.35405	4.51768	6.37727
0	0.0776987	0.246094	0.248047	0.474003	0.550282	0.738281	0.824508	1.01467	1.23047	1.25484	1.32526	1.44635	1.73734	1.98438	2.47321	3.36684	4.51931	6.43489
0	0.0815248	0.246094	0.248047	0.481303	0.550282	0.738281	0.834682	1.01467	1.23047	1.25484	1.32526	1.44635	1.74015	1.98438	2.47321	3.3738	4.53011	6.43967
0	0.0831806	0.246094	0.248047	0.489877	0.550282	0.738281	0.851145	1.01467	1.23047	1.25484	1.32526	1.44635	1.74015	1.98438	2.47321	3.3738	4.53774	6.45967
0	0.0834883	0.246094	0.248047	0.492188	0.550282	0.738281	0.852128	1.01467	1.23047	1.25484	1.32526	1.44635	1.74015	1.98438	2.47321	3.3738	4.53774	6.47372
0	0.0869914	0.246094	0.248047	0.492188	0.550282	0.738281	0.856673	1.01467	1.23047	1.25484	1.32526	1.46381	1.74015	1.98438	2.47321	3.38374	4.55354	6.49578
0	0.088706	0.246094	0.248047	0.492188	0.550282	0.738281	0.861427	1.01467	1.23047	1.25484	1.32526	1.4661	1.74015	1.98438	2.47321	3.41611	4.56029	6.53887
0	0.0933037	0.246094	0.248047	0.492188	0.550282	0.738281	0.866977	1.01467	1.23047	1.25484	1.32526	1.47656	1.74015	1.98438	2.47321	3.42426	4.57011	6.54289
0	0.0935273	0.246094	0.248047	0.492188	0.550282	0.738281	0.876602	1.01467	1.23047	1.25484	1.32526	1.47656	1.74015	1.98438	2.47321	3.43372	4.57761	6.54863
0	0.0945824	0.246094	0.248047	0.492188	0.550282	0.738281	0.880765	1.01467	1.23047	1.25484	1.32526	1.47656	1.74015	1.99982	2.47657	3.44598	4.57761	6.60476
0	0.0958377	0.246094	0.248047	0.492188	0.550282	0.738281	0.887304	1.01467	1.23047	1.25484	1.32526	1.47656	1.74015	1.99982	2.48047	3.45489	4.59429	6.62628
0	0.0963623	0.246094	0.248047	0.492188	0.550282	0.738281	0.887304	1.01467	1.23047	1.25484	1.32526	1.47656	1.74015	1.99982	2.48047	3.46941	4.59741	6.64453
0	0.0963748	0.246094	0.248047	0.492188	0.550282	0.738281	0.887304	1.01467	1.23047	1.25484	1.32526	1.47656	1.74015	1.99982	2.48047	3.46961	4.59741	6.6558
0	0.0964616	0.246094	0.248047	0.492188	0.550282	0.738281	0.887304	1.01467	1.23047	1.25484	1.32526	1.47656	1.74015	1.99982	2.48047	3.47624	4.61394	6.67288
0	0.100828	0.246094	0.248047	0.492188	0.550282	0.738281	0.887304	1.01467	1.23047	1.25484	1.32526	1.47656	1.74015	1.99982	2.48047	3.48029	4.61871	6.67887
0	0.102696	0.246094	0.248047	0.492188	0.550282	0.738281	0.887304	1.01957	1.23047	1.25484	1.32526	1.47656	1.74015	1.99982	2.48047	3.48185	4.62368	6.69447
0	0.103208	0.246094	0.248047	0.492188	0.550282	0.738281	0.887304	1.02029	1.23047	1.25484	1.32526	1.47656	1.74015	2.02763	2.48047	3.49994	4.63207	6.81113
0	0.107151	0.246094	0.248047	0.492188	0.550282	0.738281	0.887304	1.02272	1.23047	1.25484	1.33209	1.47671	1.74015	2.02934	2.48047	3.5003	4.63907	6.82439
0	0.107303	0.246094	0.249637	0.492188	0.550282	0.738281	0.887304	1.02272	1.23047	1.25484	1.3322	1.48828	1.74015	2.02934	2.48047	3.50188	4.66038	6.82439
0	0.109496	0.246094	0.252196	0.492188	0.550282	0.738281	0.887304	1.02272	1.23047	1.25484	1.33391	1.48828	1.74015	2.02934	2.49284	3.50791	4.66038	6.82467
0	0.110869	0.246094	0.253101	0.492188	0.550282	0.738281	0.887304	1.02272	1.23047	1.25484	1.33562	1.48828	1.74015	2.02934	2.50967	3.50791	4.6693	6.86081
0	0.114146	0.246094	0.253884	0.492188	0.550455	0.738281	0.887304	1.02272	1.23047	1.25484	1.33577	1.48828	1.74015	2.0354	2.52754	3.50791	4.69851	6.87855
0	0.118468	0.246094	0.255124	0.492188	0.554559	0.738281	0.887304	1.02272	1.23047	1.25484	1.33577	1.48828	1.74015	2.05725	2.53176	3.50791	4.70161	6.91869
0	0.119653	0.246094	0.256474	0.492188	0.55465	0.738281	0.894346	1.02272	1.23047	1.25484	1.33577	1.48828	1.74015	2.0581	2.53369	3.5109	4.70636	6.95579
0	0.119658	0.246094	0.256517	0.492188	0.55465	0.738281	0.894346	1.02272	1.23047	1.25484	1.33577	1.48828	1.74015	2.07249	2.53369	3.51271	4.70679	6.98506
0	0.12076	0.246094	0.259623	0.492188	0.55465	0.738281	0.894346	1.02272	1.23047	1.25484	1.33577	1.48828	1.74015	2.08355	2.53369	3.52353	4.72662	6.98506
0	0.121288	0.246094	0.259676	0.492188	0.55465	0.738281	0.894346	1.04152	1.23047	1.25484	1.33577	1.49134	1.74015	2.08817	2.53369	3.52353	4.72731	6.99963
0	0.124939	0.246094	0.261749	0.492188	0.55465	0.738281	0.894346	1.04218	1.23047	1.25484	1.33577	1.49217	1.74015	2.08817	2.55311	3.52541	4.72749	6.99963
0	0.125831	0.246094	0.263241	0.492188	0.55465	0.738281	0.894346	1.04329	1.23047	1.25484	1.33577	1.49249	1.74203	2.10212	2.5538	3.55149	4.73346	7.00266
0	0.127177	0.246094	0.266362	0.492188	0.55465	0.738281	0.894346	1.04409	1.23047	1.25484	1.33577	1.49693	1.74712	2.10242	2.5538	3.56417	4.73371	7.00395
0	0.127564	0.246094	0.269341	0.492188	0.55465	0.738281	0.894346	1.04409	1.23047	1.25484	1.33577	1.49693	1.75396	2.10263	2.5538	3.57738	4.73371	7.02459
0	0.128145	0.246094	0.275244	0.492188	0.55465	0.738281	0.894346	1.04409	1.23047	1.25484	1.33577	1.49693	1.75396	2.10263	2.5538	3.57738	4.73893	7.02459
0	0.135843	0.246094	0.279045	0.492188	0.55465	0.738281	0.894346	1.04409	1.23047	1.25484	1.33577	1.49693	1.75396	2.10475	2.5538	3.57738	4.75286	7.07672
0	0.136026	0.246094	0.279717	0.492188	0.55465	0.738281	0.894346	1.04409	1.23047	1.25484	1.3437	1.49693	1.75396	2.10475	2.5538	3.58318	4.75286	7.09431
0	0.136415	0.246094	0.286416	0.492188	0.55465	0.738281	0.894346	1.04409	1.23047	1.25484	1.36779	1.49708	1.75396	2.10475	2.56322	3.60321	4.75286	7.09843
0	0.136906	0.246094	0.288902	0.492188	0.55465	0.738281	0.894346	1.04409	1.23047	1.25484	1.3764	1.50365	1.75396	2.10475	2.56782	3.60694	4.76002	7.10731
0	0.137122	0.246094	0.297156	0.492188	0.55465	0.738281	0.894346	1.04409	1.23047	1.25484	1.37808	1.50881	1.75396	2.1101	2.56929	3.60975	4.77128	7.13672
0	0.138093	0.246094	0.297307	0.492188	0.55465	0.738281	0.901858	1.04409	1.23047	1.25484	1.38191	1.50881	1.75396	2.11698	2.56929	3.63894	4.77128	7.15477
0	0.138331	0.246094	0.298078	0.492188	0.55465	0.738281	0.903859	1.04409	1.23047	1.25484	1.38863	1.52189	1.75396	2.11698	2.56946	3.65631	4.77378	7.15906
0	0.138522	0.246094	0.298259	0.492188	0.55465	0.738281	0.910297	1.04409	1.23047	1.25484	1.39212	1.52203	1.75396	2.11698	2.57088	3.65845	4.79058	7.1748
0	0.13893	0.246094	0.29917	0.492188	0.55465	0.738281	0.936629	1.04409	1.23047	1.25484	1.39212	1.52869	1.75396	2.11698	2.57315	3.66237	4.79058	7.22323
0	0.140927	0.246094	0.3015	0.492188	0.55703	0.738281	0.942065	1.04718	1.23047	1.25484	1.39212	1.5309	1.75396	2.11698	2.57797	3.68699	4.79239	7.23175
0	0.142409	0.246094	0.307485	0.492188	0.562202	0.738281	0.942179	1.05237	1.23047	1.25484	1.39212	1.54223	1.75396	2.11698	2.58969	3.68748	4.8162	7.2445
0	0.142966	0.246094	0.309712	0.492188	0.567276	0.738281	0.943951	1.06161	1.23047	1.25484	1.39212	1.54437	1.75396	2.11698	2.58969	3.68748	4.8162	7.26706
0	0.14461	0.246094	0.310622	0.492188	0.573303	0.738281	0.947122	1.06562	1.23047	1.25484	1.39212	1.55643	1.75396	2.11698	2.58969	3.68748	4.8261	7.29528
0	0.14499	0.246094	0.314121	0.492188	0.58196	0.738281	0.952561	1.06709	1.23047	1.25484	1.39212	1.55643	1.75396	2.11698	2.60172	3.68748	4.83498	7.32474
0	0.145111	0.246094	0.326651	0.492188	0.582965	0.738281	0.956394	1.06818	1.23047	1.25484	1.39212	1.55643	1.75396	2.11698	2.61601	3.6878	4.83498	7.34168
0	0.145916	0.246094	0.327026	0.492188	0.583702	0.738281	0.957373	1.08	1.23863	1.25484	1.39212	1.5583	1.75396	2.11698	2.61601	3.69141	4.83498	7.34954
0	0.146672	0.246094	0.333335	0.492188	0.585182	0.74325	0.961806	1.09729	1.24023	1.25484	1.39212	1.55967	1.75396	2.11698	2.61601	3.69141	4.83498	7.37496
0	0.149853	0.246094	0.335483	0.492188	0.586331	0.744141	0.963118	1.10056	1.24023	1.25639	1.39212	1.56049	1.75396	2.11698	2.63669	3.69141	4.83498	7.38691
0	0.150444	0.246094	0.336582	0.492188	0.595558	0.744141	0.963301	1.10056	1.24023	1.25944	1.39212	1.56735	1.76576	2.11698	2.63677	3.69141	4.83498	7.44554
0	0.150841	0.246094	0.33782	0.492188	0.596433	0.744141	0.967316	1.10056	1.24023	1.26306	1.39583	1.56879	1.76743	2.11698	2.63677	3.69141	4.84748	7.48465
0	0.153195	0.246094	0.33869	0.492188	0.596849	0.744141	0.969503	1.10056	1.24023	1.2648	1.39865	1.56879	1.77461	2.11698	2.63677	3.69141	4.85373	7.48465
0	0.154186	0.246094	0.338797	0.492188	0.597949	0.744141	0.969707	1.10056	1.24023	1.2648	1.40317	1.57577	1.77461	2.11931	2.649	3.69141	4.85373	7.48465
0	0.154931	0.246094	0.344049	0.492188	0.601215	0.744141	0.971224	1.10056	1.24023	1.2648	1.40317	1.57577	1.77461	2.1225	2.6589	3.69141	4.85373	7.48465
0	0.15659	0.246094	0.345974	0.492188	0.602105	0.744141	0.97961	1.10056	1.24023	1.2648	1.41099	1.57577	1.77461	2.13378	2.66191	3.6996	4.87335	7.48465
0	0.15798	0.246094	0.346095	0.492188	0.603231	0.744141	0.984375	1.10056	1.24023	1.2648	1.41784	1.57577	1.78337	2.13378	2.66191	3.6996	4.88482	7.65572
0	0.159525	0.246094	0.346634	0.492188	0.604055	0.744141	0.984375	1.10056	1.24023	1.2648	1.41939	1.57577	1.78869	2.13378	2.66191	3.6996	4.88596	7.66455
0	0.159846	0.246094	0.348029	0.492188	0.608978	0.744141	0.984375	1.10056	1.24023	1.2648	1.43138	1.57577	1.78869	2.13378	2.66191	3.6996	4.89225	7.72358
0	0.16172	0.246094	0.348029	0.492188	0.609724	0.744141	0.984375	1.10056	1.24023	1.2648	1.43462	1.57577	1.78893	2.13378	2.66191	3.6996	4.90338	7.72538
0	0.162082	0.246094	0.348029	0.492188	0.612145	0.744141	0.984375	1.10056	1.24023	1.2648	1.43496	1.57577	1.7892	2.13378	2.67155	3.70858	4.91805	7.7275
0	0.162508	0.246094	0.348029	0.492188	0.620187	0.744141	0.984375	1.10056	1.24023	1.2648	1.43496	1.57577	1.79159	2.13378	2.67155	3.73599	4.92802	7.7275
0	0.162706	0.246094	0.348029	0.492188	0.627503	0.744141	0.984375	1.10056	1.24023	1.2648	1.43496	1.57577	1.79159	2.13378	2.67155	3.74839	4.96511	7.81711
0	0.162975	0.246094	0.348029	0.492188	0.628548	0.744141	0.984375	1.10056	1.24023	1.2648	1.43496	1.57577	1.79159	2.13378	2.67155	3.75363	4.97325	7.84393
0	0.163677	0.246094	0.348029	0.492188	0.630738	0.744141	0.984375	1.10056	1.24023	1.2648	1.43496	1.57577	1.79159	2.1436	2.67155	3.75646	4.98302	7.87884
0	0.164106	0.246094	0.348029	0.492188	0.634898	0.744141	0.984375	1.10056	1.24023	1.2648	1.43496	1.57577	1.79159	2.16544	2.67155	3.76322	4.99185	7.87915
0	0.164274	0.246094	0.348029	0.492188	0.636788	0.744141	0.984375	1.10167	1.24023	1.27241	1.43496	1.57577	1.79159	2.16637	2.67155	3.76451	4.99185	7.88667
0	0.165618	0.246094	0.348029	0.492188	0.638682	0.744141	0.984375	1.1019	1.24023	1.27347	1.43496	1.57577	1.79596	2.17516	2.68304	3.76451	5.00201	8.03304
0	0.168202	0.246094	0.348029	0.492188	0.639601	0.744141	0.984375	1.10316	1.24023	1.27482	1.43496	1.57577	1.79793	2.19885	2.68957	3.77814	5.01742	8.03381
0	0.170167	0.246094	0.348029	0.492188	0.644686	0.744141	0.984375	1.1093	1.24023	1.28342	1.43496	1.57577	1.80003	2.20113	2.69734	3.77814	5.01935	8.06121
0	0.170652	0.246094	0.348029	0.492188	0.653052	0.744141	0.984375	1.1093	1.24023	1.28903	1.43496	1.57577	1.80094	2.20113	2.70703	3.78627	5.01935	8.12519
0	0.170676	0.246094	0.348029	0.492188	0.659792	0.744141	0.984375	1.1093	1.24023	1.3065	1.43496	1.57577	1.80581	2.20113	2.72439	3.78627	5.02257	8.15087
0	0.172444	0.246094	0.348029	0.492188	0.665905	0.749329	0.984375	1.1093	1.24023	1.3138	1.43496	1.57577	1.80581	2.20113	2.72852	3.78627	5.02257	8.1893
0	0.17332	0.246094	0.348029	0.492188	0.667858	0.751828	0.984375	1.11595	1.24023	1.32324	1.43496	1.57577	1.80581	2.21484	2.72852	3.79316	5.02882	8.25424
0	0.174519	0.246094	0.348029	0.492188	0.676387	0.760278	0.984375	1.11837	1.24023	1.32526	1.43496	1.57577	1.81181	2.21484	2.72852	3.79439	5.04276	8.2655
0	0.174595	0.246094	0.348029	0.492188	0.679125	0.765291	0.984375	1.12152	1.24023	1.32526	1.43496	1.57577	1.82257	2.21484	2.73977	3.79439	5.04942	8.33821
0	0.176063	0.246094	0.348029	0.492188	0.680227	0.767307	0.984375	1.12348	1.24023	1.32526	1.43496	1.57577	1.8235	2.21484	2.73977	3.8204	5.04942	8.38165
0	0.179044	0.246094	0.348029	0.492188	0.683351	0.771088	0.984375	1.12508	1.24023	1.32526	1.43496	1.57577	1.84313	2.21484	2.75141	3.83275	5.04942	8.40862
0	0.179832	0.246094	0.348029	0.492188	0.689283	0.774407	0.984375	1.1377	1.24023	1.32526	1.43496	1.57577	1.867	2.2186	2.75141	3.84411	5.04942	8.42264
0	0.180548	0.246094	0.348029	0.492188	0.696058	0.778217	0.984375	1.14912	1.24023	1.32526	1.43496	1.57577	1.87419	2.22847	2.75141	3.85072	5.04986	8.43359
0	0.181211	0.246094	0.348029	0.492188	0.696058	0.778217	0.984375	1.1549	1.24023	1.32526	1.43496	1.57577	1.87419	2.22847	2.75141	3.85072	5.05991	8.48577
0	0.182266	0.246094	0.348029	0.492188	0.696058	0.778217	0.984375	1.15719	1.24023	1.32526	1.43496	1.57577	1.87419	2.22847	2.75141	3.85072	5.07335	8.54279
0	0.18257	0.246094	0.348029	0.492188	0.696058	0.778217	0.984375	1.16377	1.24023	1.32526	1.43496	1.57577	1.87843	2.22848	2.75141	3.85198	5.07335	8.58511
0	0.183958	0.246094	0.348029	0.492188	0.696058	0.778217	0.984375	1.16415	1.24023	1.32526	1.43496	1.57577	1.88514	2.23242	2.75141	3.86492	5.07335	8.59618
0	0.184396	0.246094	0.348029	0.492188	0.696058	0.778217	0.984375	1.17412	1.24036	1.32526	1.43496	1.57577	1.88826	2.23242	2.75141	3.86647	5.07335	8.6465
0	0.186489	0.246094	0.348029	0.492188	0.696058	0.778217	0.984375	1.18029	1.24336	1.32526	1.43496	1.57577	1.88907	2.23242	2.75141	3.87462	5.0835	8.6639
0	0.186918	0.246094	0.348029	0.492188	0.696058	0.778217	0.984375	1.186	1.24442	1.32526	1.43496	1.57577	1.88907	2.23242	2.77325	3.87462	5.08405	8.66935
0	0.188327	0.246094	0.348029	0.492188	0.696058	0.778217	0.984375	1.19211	1.2533	1.32526	1.43496	1.57712	1.8899	2.23242	2.77325	3.87462	5.0886	8.69888
0	0.191106	0.246094	0.348029	0.492188	0.696058	0.778217	0.98819	1.19659	1.25484	1.32526	1.43496	1.57939	1.90298	2.23537	2.77325	3.88255	5.1076	8.70324
0	0.191169	0.246094	0.348029	0.492188	0.696058	0.778217	0.992188	1.19717	1.25484	1.32526	1.43496	1.57951	1.90417	2.23889	2.77325	3.88875	5.1076	8.73815
0	0.191907	0.246094	0.348029	0.492188	0.696058	0.778217	0.992188	1.20285	1.25484	1.32526	1.43496	1.58827	1.91031	2.24616	2.77325	3.89108	5.11362	8.74877
0	0.192099	0.246094	0.348029	0.492188	0.696058	0.778217	0.992188	1.20694	1.25484	1.32526	1.43496	1.58827	1.92013	2.24616	2.77325	3.89108	5.11362	8.76614
0	0.192446	0.246094	0.348029	0.492188	0.696058	0.778217	0.992188	1.20956	1.25484	1.32526	1.43496	1.58827	1.92205	2.24616	2.80238	3.89108	5.11362	8.76627
0	0.19403	0.246094	0.348029	0.492188	0.698559	0.778217	0.992188	1.20974	1.25484	1.32526	1.43496	1.58827	1.92205	2.24616	2.80519	3.89108	5.11362	8.76978
0	0.194642	0.246094	0.348029	0.492188	0.701583	0.778217	0.992188	1.21268	1.25484	1.32526	1.43496	1.58827	1.92205	2.24616	2.80633	3.91876	5.11625	8.88133
0	0.194676	0.246094	0.348029	0.492188	0.701583	0.778217	0.992188	1.21595	1.25484	1.32526	1.43496	1.58827	1.92205	2.26006	2.82817	3.91997	5.13859	8.88269
0	0.195009	0.246094	0.348029	0.492188	0.701583	0.778217	0.992188	1.21939	1.25484	1.32526	1.437	1.58827	1.92205	2.26887	2.82817	3.92197	5.17382	8.89171
0	0.195353	0.246094	0.348029	0.492188	0.701583	0.778217	0.992188	1.22494	1.25484	1.32526	1.44635	1.58827	1.92205	2.28366	2.82817	3.92197	5.17598	8.90175
0	0.198624	0.246094	0.348029	0.492188	0.701583	0.778217	0.992188	1.22521	1.25484	1.32526	1.44635	1.58827	1.92205	2.28688	2.82817	3.92197	5.17615	8.92069
0	0.199975	0.246094	0.348029	0.492188	0.701583	0.778217	0.992188	1.23047	1.25484	1.32526	1.44635	1.58827	1.92205	2.28688	2.86992	3.92816	5.19135	8.94346
0	0.200365	0.246094	0.348029	0.492188	0.701583	0.778217	0.992188	1.23047	1.25484	1.32526	1.44635	1.58827	1.92205	2.28688	2.87075	3.92841	5.21463	8.98158
0	0.201259	0.246094	0.348029	0.492188	0.708433	0.778217	0.992188	1.23047	1.25484	1.32526	1.44635	1.58827	1.92205	2.28688	2.8927	3.9375	5.21489	9.0253
0	0.203849	0.246094	0.348029	0.492188	0.712268	0.778217	0.992188	1.23047	1.25484	1.32526	1.44635	1.59977	1.92205	2.28688	2.8927	3.9375	5.22044	9.04876
0	0.205163	0.246094	0.348029	0.492188	0.712804	0.778217	0.992188	1.23047	1.25484	1.32526	1.44635	1.60742	1.92205	2.29968	2.8927	3.94185	5.22044	9.08467
0	0.206323	0.246094	0.348029	0.492188	0.71405	0.778217	0.992188	1.23047	1.25484	1.32526	1.44635	1.6214	1.92205	2.32164	2.90321	3.94518	5.22044	9.15088
0	0.207558	0.246094	0.348029	0.492188	0.71709	0.778217	0.992188	1.23047	1.25484	1.32526	1.44635	1.64452	1.92205	2.32164	2.90331	3.94518	5.30102	9.18823
0	0.210327	0.246094	0.348029	0.492188	0.718117	0.778217	0.992188	1.23047	1.25484	1.32526	1.44635	1.65056	1.92205	2.32164	2.95312	3.94606	5.30102	9.21787
0	0.212442	0.246094	0.348029	0.493411	0.718526	0.778217	0.992188	1.23047	1.25484	1.33577	1.44635	1.65085	1.92205	2.32164	2.95312	3.94877	5.30102	9.21787
0	0.212488	0.246094	0.348029	0.494081	0.721607	0.778217	0.992188	1.23047	1.25484	1.33577	1.44635	1.65085	1.93731	2.32164	2.95312	3.96814	5.30102	9.25064
0	0.213038	0.246094	0.348029	0.49529	0.734748	0.778217	0.992188	1.23047	1.25484	1.33577	1.45651	1.65085	1.93731	2.32164	2.96336	3.96814	5.30412	9.37097
0	0.214369	0.246094	0.348029	0.49597	0.738281	0.778217	0.994948	1.23047	1.25484	1.33577	1.45785	1.65085	1.93731	2.32164	2.96746	3.96814	5.31243	9.44534
0	0.214852	0.246094	0.348029	0.496094	0.738281	0.778217	0.997361	1.23047	1.25484	1.33577	1.4661	1.65675	1.93731	2.32164	2.97135	3.97577	5.33516	9.44534
0	0.214891	0.246094	0.348029	0.496094	0.738281	0.782969	1.00079	1.23047	1.25484	1.33577	1.47656	1.65822	1.93731	2.32164	2.97356	3.99964	5.34309	9.44534
0	0.215442	0.246094	0.348029	0.496094	0.738281	0.784393	1.00226	1.23047	1.25484	1.33577	1.47656	1.66395	1.93731	2.32164	2.97467	4.00545	5.34309	9.49407
0	0.216802	0.246094	0.348029	0.496094	0.738281	0.784393	1.00727	1.23047	1.25484	1.33577	1.47656	1.66395	1.93731	2.32164	2.97656	4.00612	5.35411	9.49616
0	0.216983	0.246094	0.348029	0.496094	0.738281	0.784393	1.01193	1.23047	1.25484	1.33577	1.47656	1.66395	1.93731	2.32164	2.97656	4.00612	5.3546	9.49935
0	0.217762	0.246094	0.348029	0.496094	0.738281	0.784393	1.01467	1.23047	1.25484	1.33577	1.47656	1.68468	1.93731	2.32164	2.98688	4.00732	5.36607	9.62601
0	0.223823	0.246094	0.348029	0.496094	0.738281	0.784393	1.01467	1.23047	1.25484	1.33577	1.47656	1.68838	1.93731	2.32164	2.98688	4.03791	5.39726	9.75103
0	0.224134	0.246094	0.348084	0.496094	0.738281	0.784393	1.01467	1.23047	1.25484	1.33577	1.47656	1.7085	1.93731	2.33465	2.98688	4.06827	5.39726	9.7845
0	0.224351	0.246094	0.34907	0.496094	0.738281	0.784393	1.01467	1.23047	1.25484	1.33669	1.47656	1.71853	1.93731	2.33465	2.98688	4.07307	5.41117	9.7845
0	0.228496	0.246094	0.349514	0.496094	0.738281	0.784393	1.01467	1.23047	1.25484	1.33955	1.47656	1.7192	1.96875	2.33673	2.99386	4.07358	5.41338	9.80677
0	0.228734	0.246094	0.349723	0.496094	0.738281	0.784393	1.01467	1.23047	1.25484	1.34759	1.47656	1.72266	1.96875	2.34007	2.99716	4.07358	5.41406	9.80677
0	0.229846	0.246094	0.350791	0.496094	0.738281	0.784393	1.01467	1.23047	1.25484	1.36125	1.47656	1.72266	1.96875	2.34007	3.00396	4.09582	5.41965	9.80677
0	0.231246	0.246094	0.350791	0.496094	0.738281	0.784393	1.01467	1.23047	1.25484	1.36666	1.47656	1.72266	1.96875	2.34007	3.00396	4.12528	5.43639	9.8378
0	0.231969	0.246094	0.350791	0.496094	0.738281	0.784393	1.01467	1.23047	1.25484	1.36743	1.47656	1.72266	1.96875	2.34007	3.02554	4.12528	5.44009	9.84375
0	0.232273	0.246094	0.350791	0.496094	0.738281	0.784393	1.01467	1.23047	1.25484	1.36915	1.47656	1.72266	1.96875	2.34007	3.0278	4.13211	5.44009	9.84683
0	0.232872	0.246094	0.350791	0.496094	0.738281	0.789779	1.01467	1.23047	1.25484	1.37367	1.47656	1.72266	1.96875	2.34007	3.0278	4.15457	5.44009	9.84683
0	0.232932	0.246094	0.350791	0.496094	0.738281	0.804628	1.01467	1.23047	1.25484	1.37468	1.47656	1.72266	1.96875	2.34007	3.06817	4.15802	5.44009	9.84683
0	0.233081	0.246094	0.350791	0.496094	0.738281	0.806501	1.01467	1.23047	1.25484	1.37898	1.48071	1.72266	1.96875	2.34363	3.07066	4.15889	5.44752	9.92036
0	0.23312	0.246094	0.350791	0.496094	0.738281	0.808544	1.01467	1.23047	1.25484	1.38301	1.48525	1.72266	1.98407	2.35136	3.10549	4.17825	5.45868	9.92188
0	0.233969	0.246094	0.350791	0.496094	0.738281	0.809005	1.01467	1.23047	1.25484	1.38665	1.48828	1.72266	1.98407	2.35283	3.10802	4.18359	5.47334	10.0359
0	0.236078	0.246094	0.350791	0.496094	0.738281	0.810982	1.01467	1.23047	1.25484	1.38807	1.48828	1.73633	1.98407	2.35318	3.10802	4.20197	5.49075	10.0447
0	0.236475	0.246094	0.350791	0.496094	0.738281	0.82122	1.01467	1.23047	1.25484	1.39212	1.48828	1.73633	1.98407	2.35318	3.10802	4.2168	5.49075	10.1168
0	0.236882	0.246094	0.350791	0.496094	0.738281	0.831848	1.01467	1.23047	1.25484	1.39212	1.48828	1.73633	1.98407	2.3691	3.10859	4.2168	5.50282	10.2418
0	0.237106	0.246094	0.350791	0.496094	0.738281	0.835603	1.01467	1.23047	1.25484	1.39212	1.48828	1.73633	1.98407	2.37482	3.11276	4.21745	5.50282	10.2801
0	0.237487	0.246094	0.350791	0.496094	0.738281	0.847315	1.01467	1.23047	1.25484	1.39212	1.48828	1.73633	1.98407	2.4188	3.11619	4.22169	5.50753	10.5267
0	0.23915	0.246094	0.350791	0.496094	0.738281	0.848053	1.01467	1.23047	1.25484	1.39212	1.48828	1.73633	1.98438	2.42374	3.12135	4.22392	5.53027	10.5296
0	0.239397	0.246094	0.350791	0.496094	0.738281	0.851269	1.01467	1.23047	1.25484	1.39485	1.48828	1.73633	1.98438	2.42374	3.13757	4.22409	5.5465	10.5849
0	0.241162	0.246094	0.350791	0.496094	0.738281	0.852489	1.01467	1.23047	1.25484	1.39584	1.48927	1.73633	1.98438	2.42738	3.13757	4.2273	5.5465	10.6191
0	0.242093	0.246094	0.350791	0.496094	0.738281	0.85677	1.01467	1.23047	1.25484	1.40317	1.49	1.73633	1.98438	2.44298	3.15248	4.23254	5.55213	10.6342
0	0.242628	0.246094	0.350791	0.496094	0.738281	0.866977	1.01467	1.23047	1.25484	1.40317	1.49204	1.74015	1.98438	2.44298	3.15712	4.23396	5.55213	10.6502
0	0.244401	0.246094	0.350791	0.496094	0.738281	0.870258	1.01467	1.23047	1.25484	1.40317	1.49693	1.74015	1.98438	2.44298	3.17655	4.23396	5.57416	10.6533
0	0.24532	0.246094	0.352814	0.496094	0.738281	0.877556	1.01467	1.23047	1.25484	1.40317	1.49693	1.74015	1.98438	2.44298	3.17655	4.23396	5.57869	10.7327
0	0.245561	0.246094	0.354766	0.496094	0.738281	0.887304	1.01467	1.23047	1.25484	1.40687	1.49693	1.74015	1.98438	2.44298	3.18434	4.23492	5.59619	10.7465
0	0.246094	0.246094	0.356496	0.496094	0.738281	0.887304	1.01467	1.23047	1.25484	1.41273	1.49693	1.74015	1.98438	2.44298	3.19922	4.23863	5.59619	10.7693
0	0.246094	0.246094	0.357442	0.496094	0.738281	0.887304	1.01467	1.23047	1.25484	1.41284	1.49693	1.74015	1.98438	2.44298	3.19922	4.23863	5.59976	10.8526
0	0.246094	0.246094	0.357945	0.496177	0.738281	0.887304	1.01467	1.23047	1.25484	1.42194	1.5041	1.74015	1.98438	2.46094	3.19922	4.23974	5.6118	10.8745
0	0.246094	0.246094	0.360694	0.499392	0.738281	0.887304	1.01677	1.23047	1.25484	1.42604	1.50881	1.74015	1.98438	2.46094	3.19922	4.24293	5.64354	10.8802
0	0.246094	0.246094	0.363817	0.500022	0.738281	0.887304	1.01912	1.23047	1.25484	1.42678	1.50881	1.74015	1.99668	2.46094	3.19922	4.24824	5.65634	10.9283
0	0.246094	0.246094	0.364355	0.511589	0.738281	0.887304	1.01955	1.23047	1.25484	1.42687	1.50881	1.74015	1.99982	2.46094	3.19922	4.26756	5.65634	10.9394
0	0.246094	0.246094	0.367678	0.513026	0.738281	0.887304	1.0199	1.23047	1.2557	1.43496	1.50881	1.74015	1.99982	2.46094	3.19922	4.26756	5.65955	10.9586
0	0.246094	0.246094	0.368257	0.520124	0.738281	0.887304	1.02272	1.23047	1.2648	1.43496	1.50881	1.74015	1.99982	2.46094	3.21504	4.29784	5.66016	10.9811
0	0.246094	0.246094	0.372976	0.520627	0.738281	0.887304	1.02272	1.23047	1.2648	1.43496	1.50881	1.74015	1.99982	2.46094	3.23414	4.30488	5.66016	10.9974
0	0.246094	0.246094	0.375607	0.522491	0.738281	0.887304	1.02272	1.23047	1.2648	1.43496	1.50881	1.74015	1.99982	2.46094	3.25051	4.30488	5.6655	11.077
0	0.246094	0.246094	0.376916	0.524985	0.738281	0.887304	1.02272	1.23047	1.2648	1.43496	1.51037	1.74015	2.02934	2.46229	3.26255	4.30921	5.6655	11.093
0	0.246094	0.246094	0.381227	0.525904	0.738281	0.887304	1.02272	1.23047	1.2648	1.43496	1.51085	1.74015	2.02934	2.47321	3.26255	4.3182	5.68152	11.1858
0	0.246094	0.246094	0.381796	0.529458	0.738281	0.887304	1.02272	1.23047	1.2648	1.43496	1.53904	1.74015	2.02934	2.47321	3.2833	4.33905	5.68152	11.1962
0	0.246094	0.246094	0.382896	0.530254	0.738281	0.887304	1.02272	1.23047	1.2648	1.43496	1.54985	1.74015	2.03764	2.47321	3.2833	4.34924	5.70057	11.2061
0	0.246094	0.246094	0.383468	0.536514	0.738281	0.887304	1.02272	1.23047	1.2648	1.43496	1.55643	1.74015	2.04545	2.47657	3.2884	4.36044	5.70715	11.2263
0	0.246094	0.246094	0.385829	0.543561	0.738281	0.887304	1.02272	1.23047	1.2648	1.43496	1.55643	1.74015	2.04545	2.48047	3.30936	4.36079	5.72661	11.2347
0	0.246094	0.246094	0.386054	0.550282	0.738281	0.887304	1.02272	1.23047	1.2648	1.43496	1.55643	1.74015	2.06427	2.48047	3.31381	4.37018	5.73984	11.2982
0	0.246094	0.246094	0.386863	0.550282	0.738281	0.887304	1.02272	1.23047	1.2648	1.43496	1.55967	1.74015	2.06982	2.48047	3.31417	4.39205	5.76942	11.3127
0	0.246094	0.246094	0.388031	0.550282	0.738281	0.889106	1.02272	1.23047	1.2648	1.43496	1.56735	1.74015	2.08412	2.48047	3.33713	4.3954	5.77244	11.323
0	0.246094	0.246094	0.39625	0.550282	0.738281	0.890728	1.02761	1.23047	1.2648	1.43496	1.56784	1.74015	2.08801	2.48047	3.33713	4.41635	5.79236	11.3236
0	0.246094	0.246094	0.396786	0.550282	0.738281	0.894156	1.02817	1.23047	1.2648	1.43496	1.56879	1.74015	2.08817	2.48047	3.34724	4.41912	5.81192	11.3444
0	0.246094	0.246094	0.399933	0.550282	0.738281	0.894346	1.04409	1.23047	1.2648	1.43496	1.56879	1.74015	2.09953	2.48047	3.35268	4.43652	5.81192	11.363
0	0.246094	0.246868	0.400449	0.550282	0.738281	0.894346	1.04409	1.23047	1.2648	1.43496	1.56879	1.74015	2.10263	2.48047	3.36405	4.43652	5.83833	11.3832
0	0.246094	0.247248	0.400759	0.550282	0.738281	0.894346	1.04409	1.23047	1.2648	1.43496	1.56879	1.74015	2.10263	2.48047	3.3738	4.43652	5.85412	11.4263
0	0.246094	0.248047	0.403523	0.550282	0.738281	0.894346	1.04409	1.23047	1.2648	1.43496	1.56879	1.74203	2.10475	2.48047	3.3738	4.43652	5.85412	11.4344
0	0.246094	0.248047	0.404345	0.550282	0.738281	0.894346	1.04409	1.23047	1.2648	1.43496	1.56886	1.75396	2.10475	2.48047	3.3738	4.44637	5.86927	11.4902
0	0.246094	0.248047	0.406432	0.550282	0.738281	0.894346	1.04409	1.23047	1.2648	1.43496	1.57577	1.75396	2.10475	2.48047	3.3738	4.44714	5.88033	11.5068
0	0.246094	0.248047	0.406632	0.550282	0.738281	0.894346	1.04409	1.23047	1.26691	1.43496	1.57577	1.75396	2.10475	2.49284	3.3738	4.46664	5.88087	11.5271
0	0.246094	0.248047	0.406837	0.550282	0.738281	0.894346	1.04409	1.23047	1.27091	1.43496	1.57577	1.75396	2.10475	2.49284	3.37591	4.47158	5.89601	11.5814
0	0.246094	0.248047	0.411015	0.550282	0.738281	0.894346	1.04409	1.23047	1.27565	1.43496	1.57577	1.75396	2.10475	2.49515	3.3832	4.47173	5.89601	11.6265
0	0.246094	0.248047	0.413235	0.550282	0.738281	0.896012	1.04409	1.23047	1.2773	1.43496	1.57577	1.75396	2.11204	2.49932	3.38576	4.47173	5.90625	11.6707
0	0.246094	0.248047	0.413759	0.550282	0.738281	0.897259	1.04821	1.23047	1.27945	1.43496	1.57577	1.75396	2.11698	2.50967	3.40295	4.47173	5.91137	11.7104
0	0.246094	0.248047	0.418799	0.550282	0.738281	0.901137	1.04927	1.23047	1.27979	1.43496	1.57577	1.75396	2.11698	2.50967	3.40692	4.47931	5.9165	11.8125
0	0.246094	0.248047	0.419283	0.550282	0.738281	0.906661	1.05237	1.23047	1.28013	1.43496	1.57577	1.75396	2.11698	2.50967	3.41356	4.49079	5.9165	11.8381
0	0.246094	0.248047	0.422366	0.550282	0.738281	0.908842	1.05237	1.23047	1.28136	1.43496	1.57577	1.75396	2.11698	2.53369	3.42226	4.49079	5.91684	11.9044
0	0.246094	0.248047	0.422967	0.550282	0.738281	0.910223	1.05237	1.23047	1.28717	1.43496	1.57577	1.75396	2.11698	2.53369	3.42769	4.50128	5.92672	11.916
0	0.246094	0.248047	0.425572	0.550282	0.738281	0.910484	1.05237	1.23047	1.28806	1.43496	1.57577	1.75396	2.11698	2.53369	3.42769	4.51768	5.92672	11.9321
0	0.246094	0.248047	0.426778	0.550282	0.738281	0.91528	1.06032	1.23047	1.28948	1.43496	1.57577	1.75396	2.11698	2.53369	3.44104	4.52438	5.94712	11.9321
0	0.246094	0.248047	0.431589	0.550282	0.738281	0.922923	1.06251	1.23047	1.29089	1.43496	1.57577	1.75396	2.11698	2.53369	3.44531	4.5331	5.95221	11.9732
0	0.246094	0.248047	0.432561	0.550282	0.738281	0.92869	1.06593	1.23047	1.29561	1.43496	1.57577	1.75396	2.11698	2.53369	3.44531	4.53774	5.95221	11.9888
0	0.246094	0.248047	0.43626	0.550282	0.738281	0.929824	1.06721	1.23047	1.29973	1.43523	1.57577	1.75396	2.11698	2.53369	3.44531	4.53774	5.96311	12.0686
0	0.246094	0.248047	0.437383	0.550282	0.738281	0.937893	1.06813	1.23047	1.31243	1.44129	1.57577	1.75396	2.11698	2.53369	3.44598	4.53774	5.96345	12.0891
0	0.246094	0.248047	0.444749	0.550282	0.738281	0.937974	1.07102	1.23047	1.31638	1.44548	1.57577	1.75396	2.11698	2.5396	3.44598	4.55354	5.96345	12.1187
0	0.246094	0.248047	0.446115	0.550282	0.738281	0.939246	1.07362	1.23047	1.3181	1.44635	1.57577	1.75396	2.11698	2.5538	3.44598	4.55529	5.97376	12.1458
0	0.246094	0.248047	0.450462	0.550282	0.738281	0.94441	1.08501	1.23519	1.31953	1.44635	1.57577	1.75396	2.11698	2.5538	3.45409	4.56029	5.98772	12.2551
0	0.246094	0.248047	0.454106	0.550282	0.738281	0.949757	1.09489	1.23599	1.32425	1.44635	1.57577	1.75396	2.11698	2.5538	3.45489	4.56029	5.99277	12.3758
0	0.246094	0.248047	0.455318	0.550282	0.738281	0.951677	1.09901	1.23911	1.32526	1.44635	1.57577	1.75396	2.11698	2.5538	3.45489	4.56029	5.99277	12.448
0	0.246094	0.248047	0.46214	0.550282	0.738281	0.957042	1.10056	1.24023	1.32526	1.44635	1.57577	1.75396	2.11698	2.5538	3.45489	4.57376	5.99277	12.4543
0	0.246094	0.248047	0.462745	0.550282	0.738281	0.958739	1.10056	1.24023	1.32526	1.44635	1.57577	1.75396	2.11698	2.5538	3.45963	4.57761	5.99432	12.4568
0	0.246094	0.248047	0.464946	0.550282	0.738281	0.959908	1.10056	1.24023	1.32526	1.44635	1.58085	1.77461	2.13378	2.55495	3.47896	4.58978	5.99945	12.4568
0	0.246094	0.248047	0.470545	0.550282	0.738281	0.969453	1.10056	1.24023	1.32526	1.44635	1.58827	1.77461	2.13378	2.56426	3.48029	4.59741	6.01291	12.5315
0	0.246094	0.248047	0.471812	0.550282	0.73837	0.971996	1.10056	1.24023	1.32526	1.44635	1.58827	1.77461	2.13378	2.56929	3.4815	4.62886	6.04034	12.5463
0	0.246094	0.248047	0.47238	0.550282	0.744141	0.973808	1.10056	1.24023	1.32526	1.44635	1.58827	1.77461	2.13378	2.56929	3.49765	4.6339	6.04034	12.6158
0	0.246094	0.248047	0.472446	0.550282	0.744141	0.9818	1.10056	1.24023	1.32526	1.44635	1.58827	1.77461	2.13378	2.56929	3.49765	4.64329	6.07807	12.7138
0	0.246094	0.248047	0.473522	0.550282	0.744141	0.984375	1.10056	1.24023	1.32526	1.44635	1.58827	1.77461	2.13378	2.56946	3.50791	4.65215	6.08094	12.774
0	0.246094	0.248047	0.47651	0.550282	0.744141	0.984375	1.10056	1.24023	1.32526	1.44635	1.58827	1.77461	2.13378	2.58969	3.50791	4.66038	6.08802	12.7969
0	0.246094	0.248047	0.477498	0.550282	0.744141	0.984375	1.10056	1.24023	1.32526	1.44635	1.58827	1.78064	2.13378	2.58969	3.52353	4.66038	6.08802	12.8051
0	0.246094	0.248047	0.480601	0.550282	0.744141	0.984375	1.10056	1.24023	1.32526	1.44635	1.58827	1.78869	2.13378	2.58969	3.52353	4.66038	6.10115	12.9941
0	0.246094	0.248047	0.482486	0.550282	0.744141	0.984375	1.10056	1.24023	1.32526	1.44635	1.58827	1.78869	2.1374	2.60234	3.52541	4.66576	6.1251	13.0219
0	0.246094	0.248047	0.48401	0.550282	0.744141	0.984375	1.10056	1.24023	1.32526	1.44635	1.58827	1.78869	2.14107	2.61601	3.52541	4.66591	6.12631	13.0542
0	0.246094	0.248047	0.486064	0.550282	0.744141	0.984375	1.10056	1.24023	1.32526	1.45997	1.58827	1.78869	2.14747	2.63677	3.52593	4.6693	6.12631	13.0905
0	0.246094	0.248047	0.486815	0.550282	0.744141	0.984375	1.10056	1.24023	1.32526	1.47656	1.58827	1.79038	2.17015	2.63677	3.53071	4.67578	6.15234	13.1815
0	0.246094	0.248047	0.48892	0.550282	0.744141	0.984375	1.10056	1.24023	1.32526	1.47656	1.58827	1.79159	2.1847	2.63677	3.54921	4.68014	6.15234	13.1839
0	0.246094	0.248047	0.490585	0.550282	0.744141	0.984375	1.10056	1.24023	1.32526	1.47656	1.58827	1.79159	2.18532	2.65051	3.55149	4.70161	6.15234	13.2526
0	0.246094	0.248047	0.492188	0.550282	0.744141	0.984375	1.10056	1.24023	1.32526	1.47656	1.58827	1.79159	2.19678	2.65051	3.55149	4.70161	6.15234	13.3347
0	0.246094	0.248047	0.492188	0.550282	0.744141	0.984375	1.10056	1.24023	1.32526	1.47656	1.58827	1.79596	2.19885	2.65685	3.55847	4.70161	6.15234	13.3715
0	0.246094	0.248047	0.492188	0.550282	0.744141	0.984375	1.10056	1.24023	1.32526	1.47656	1.58827	1.8057	2.20113	2.66191	3.57738	4.70161	6.15426	13.4001
0	0.246094	0.248047	0.492188	0.550282	0.744141	0.984375	1.10056	1.24023	1.32526	1.47656	1.58827	1.80581	2.20113	2.66191	3.57738	4.70268	6.16094	13.4037
0	0.246094	0.248047	0.492188	0.550282	0.744141	0.984375	1.10056	1.24023	1.32526	1.47656	1.58827	1.80581	2.20113	2.66763	3.58318	4.72731	6.16136	13.445
0	0.246094	0.248047	0.492188	0.550282	0.744141	0.984375	1.10056	1.24023	1.32526	1.47656	1.58827	1.80581	2.21105	2.67155	3.58318	4.73371	6.19648	13.4952
0	0.246094	0.248047	0.492188	0.550282	0.744141	0.984375	1.10056	1.24023	1.32526	1.47656	1.60053	1.82084	2.21484	2.67155	3.58318	4.73371	6.22098	13.5119
0	0.246094	0.248047	0.492188	0.550282	0.744141	0.984375	1.10056	1.24023	1.32526	1.47656	1.61277	1.82257	2.21484	2.67155	3.58319	4.75286	6.22573	13.5419
0	0.246094	0.248047	0.492188	0.550282	0.744141	0.984375	1.10056	1.24023	1.32526	1.47656	1.61854	1.82659	2.21484	2.67155	3.59366	4.77128	6.2306	13.6854
0	0.246094	0.248047	0.492188	0.550282	0.744141	0.984375	1.10056	1.24023	1.32526	1.47656	1.62582	1.82911	2.21484	2.67155	3.60196	4.77128	6.24566	13.6988
0	0.246094	0.248047	0.492188	0.550282	0.744141	0.984375	1.10323	1.24023	1.32526	1.47656	1.63033	1.83608	2.21484	2.68304	3.6034	4.77128	6.26452	13.7156
0	0.246094	0.248047	0.492188	0.550282	0.744141	0.984375	1.1037	1.24023	1.32526	1.47656	1.63804	1.8516	2.2186	2.68304	3.61162	4.79058	6.27418	13.729
0	0.246094	0.248047	0.492188	0.550282	0.744141	0.984375	1.1041	1.24023	1.32526	1.47656	1.65085	1.8674	2.2186	2.68304	3.62175	4.79058	6.27418	13.8196
0	0.246094	0.248047	0.492188	0.550282	0.744141	0.984375	1.10744	1.24023	1.32526	1.47656	1.65085	1.87419	2.2186	2.68873	3.63516	4.79455	6.27418	13.8662
0	0.246094	0.248047	0.492188	0.550282	0.744973	0.984375	1.1093	1.24023	1.32526	1.47679	1.65085	1.87419	2.2197	2.70703	3.65845	4.8162	6.27418	13.8662
0	0.246094	0.248047	0.492188	0.550282	0.747698	0.984375	1.1093	1.24023	1.32526	1.48043	1.65085	1.87419	2.22462	2.70703	3.65845	4.8162	6.27418	13.8784
0	0.246094	0.248047	0.492188	0.550282	0.77009	0.984375	1.1093	1.24023	1.32526	1.48828	1.65382	1.87419	2.22462	2.70703	3.65845	4.82578	6.27418	13.9128
0	0.246094	0.248047	0.492188	0.550282	0.772584	0.984375	1.1093	1.24023	1.32526	1.48828	1.65822	1.87594	2.22847	2.70703	3.65845	4.8348	6.27514	13.9407
0	0.246094	0.248047	0.492188	0.550282	0.778217	0.984375	1.1093	1.24023	1.32526	1.48828	1.66246	1.87804	2.22847	2.71819	3.66237	4.83498	6.32398	13.9521
0	0.246094	0.248047	0.492188	0.550282	0.778217	0.984375	1.1093	1.24023	1.32526	1.48828	1.66373	1.88907	2.22847	2.72445	3.67181	4.83498	6.32398	13.9928
0	0.246094	0.248047	0.492188	0.55465	0.778217	0.984375	1.1093	1.24023	1.32526	1.48828	1.66395	1.89008	2.22847	2.72852	3.68328	4.83498	6.33856	14.0317
0	0.246094	0.248047	0.492188	0.55465	0.778217	0.984375	1.1093	1.24023	1.32526	1.48828	1.66395	1.89086	2.22848	2.72852	3.68748	4.83498	6.38422	14.036
0	0.246094	0.248047	0.492188	0.55465	0.778217	0.984375	1.1093	1.24023	1.32526	1.48828	1.66395	1.91244	2.23242	2.72852	3.68748	4.84748	6.39844	14.0404
0	0.246094	0.248047	0.492188	0.55465	0.778217	0.984375	1.11229	1.24023	1.32526	1.48828	1.67402	1.91664	2.23242	2.74751	3.68748	4.84748	6.429	14.0618
0	0.246094	0.248047	0.492188	0.55465	0.778217	0.984375	1.115	1.24023	1.32526	1.48828	1.68394	1.92205	2.23242	2.75141	3.69141	4.84748	6.43489	14.0769
0	0.246094	0.248047	0.492188	0.55465	0.778217	0.984375	1.1169	1.24023	1.32526	1.48828	1.68902	1.92205	2.23242	2.75141	3.69141	4.84752	6.43967	14.1104
0	0.246094	0.248047	0.492188	0.55465	0.778217	0.984375	1.12233	1.24023	1.32573	1.48828	1.69384	1.92205	2.23242	2.75141	3.6996	4.85373	6.4461	14.1234
0	0.246094	0.248047	0.492188	0.55465	0.778217	0.984375	1.14428	1.24023	1.32845	1.48828	1.69394	1.92205	2.23242	2.75141	3.6996	4.85649	6.46827	14.1327
0	0.246094	0.248047	0.492188	0.55465	0.778217	0.984375	1.15617	1.24023	1.33577	1.49604	1.69898	1.92205	2.23953	2.77325	3.6996	4.88596	6.49201	14.1561
0	0.246094	0.248047	0.492188	0.55465	0.778217	0.984375	1.1602	1.24023	1.33577	1.49693	1.70118	1.92205	2.24226	2.77325	3.6996	4.88596	6.49706	14.1712
0	0.246094	0.248047	0.492188	0.55465	0.778217	0.984375	1.17023	1.24023	1.33577	1.49693	1.70326	1.92205	2.24616	2.77325	3.6996	4.88596	6.50172	14.2945
0	0.246094	0.248047	0.492188	0.55465	0.778217	0.984375	1.17893	1.24023	1.33577	1.49693	1.72266	1.92205	2.24616	2.77325	3.6996	4.89225	6.51094	14.331
0	0.246094	0.248047	0.492188	0.559418	0.778217	0.984375	1.18695	1.24023	1.33577	1.49693	1.72266	1.92205	2.24616	2.77325	3.6996	4.91108	6.51568	14.3889
0	0.246094	0.248047	0.492188	0.559773	0.778217	0.984375	1.19181	1.24023	1.33577	1.49693	1.72266	1.93595	2.25281	2.77325	3.7207	4.91384	6.51568	14.4209
0	0.246094	0.248047	0.492188	0.566102	0.778217	0.984375	1.19542	1.24023	1.33577	1.49693	1.72266	1.93665	2.26006	2.77325	3.72407	4.92188	6.52509	14.4316
0	0.246094	0.248047	0.492188	0.566653	0.778217	0.984375	1.20211	1.24023	1.33577	1.49693	1.72266	1.93731	2.26535	2.77325	3.72407	4.92188	6.53887	14.4465
0	0.246094	0.248047	0.492188	0.567003	0.778217	0.984375	1.20263	1.24023	1.33577	1.49693	1.72266	1.93731	2.26887	2.77325	3.73095	4.92188	6.53887	14.5589
0	0.246094	0.248047	0.492188	0.567276	0.778217	0.984375	1.20889	1.24023	1.33577	1.49693	1.72266	1.93731	2.26887	2.78259	3.74839	4.93679	6.55275	14.6432
0	0.246094	0.248047	0.492188	0.571374	0.778217	0.984375	1.21249	1.24023	1.33577	1.49693	1.72266	1.93731	2.26887	2.78423	3.74839	4.93736	6.55332	14.8269
0	0.246094	0.248047	0.492188	0.57587	0.778217	0.984375	1.2218	1.24023	1.33577	1.49693	1.72266	1.93731	2.26887	2.79007	3.74887	4.9423	6.5666	14.9344
0	0.246094	0.248047	0.492188	0.583586	0.778217	0.984375	1.22229	1.24023	1.33577	1.49693	1.72266	1.93731	2.26887	2.8059	3.75363	4.9423	6.60339	14.9632
0	0.246094	0.248047	0.492188	0.587302	0.778217	0.984375	1.22334	1.24108	1.33672	1.49693	1.73355	1.93731	2.26887	2.80633	3.75646	4.97694	6.61184	15.0842
0	0.246094	0.248047	0.492188	0.598671	0.778217	0.984375	1.22533	1.24293	1.3389	1.49693	1.73633	1.93731	2.26887	2.80633	3.76404	4.97694	6.62628	15.1064
0	0.246094	0.248047	0.492188	0.59955	0.778217	0.984375	1.23022	1.24458	1.34356	1.50485	1.73633	1.93731	2.28688	2.81105	3.76451	4.97694	6.62628	15.2039
0	0.246094	0.248047	0.492188	0.602105	0.778217	0.984375	1.23047	1.24997	1.3445	1.50881	1.73633	1.93731	2.28688	2.81951	3.76451	4.97694	6.62628	15.2846
0	0.246094	0.248047	0.492188	0.603991	0.778217	0.984375	1.23047	1.25001	1.34642	1.50881	1.73633	1.93731	2.28688	2.82817	3.76451	4.97784	6.64909	15.3232
0	0.246094	0.248047	0.492188	0.604878	0.778217	0.984375	1.23047	1.25278	1.35455	1.50881	1.73633	1.93731	2.28688	2.82817	3.76672	4.98302	6.67887	15.3789
0	0.246094	0.248047	0.492188	0.609286	0.778217	0.984375	1.23047	1.25336	1.35653	1.50881	1.73633	1.93731	2.28688	2.82817	3.77518	4.98302	6.70186	15.3809
0	0.246094	0.248047	0.492188	0.610476	0.778217	0.984375	1.23047	1.25484	1.36677	1.50881	1.73633	1.93731	2.28688	2.82817	3.77814	4.98302	6.72156	15.4388
0	0.246094	0.248047	0.492188	0.620431	0.778217	0.984375	1.23047	1.25484	1.36904	1.50881	1.73633	1.95072	2.28688	2.82817	3.78627	4.98302	6.72993	15.4985
0	0.246094	0.248047	0.492188	0.628595	0.778217	0.984375	1.23047	1.25484	1.37737	1.5244	1.73633	1.95202	2.28688	2.82817	3.81578	5.00134	6.7476	15.5302
0	0.246094	0.249408	0.492188	0.629141	0.778217	0.984375	1.23047	1.25484	1.37875	1.5248	1.73633	1.95332	2.31874	2.84682	3.81962	5.01501	6.7575	15.5741
0	0.246094	0.251328	0.492188	0.633062	0.778217	0.984375	1.23047	1.25484	1.38139	1.52564	1.73633	1.95785	2.32164	2.84768	3.8204	5.01935	6.7575	15.6289
0	0.246094	0.253316	0.492188	0.636319	0.778217	0.984375	1.23047	1.25484	1.3872	1.53522	1.74015	1.96875	2.32164	2.86906	3.8204	5.01935	6.82237	15.7038
0	0.246094	0.253902	0.492188	0.641761	0.778217	0.984375	1.23047	1.25484	1.39158	1.53875	1.74015	1.96875	2.32164	2.86992	3.8204	5.01935	6.84268	15.7519
0	0.246094	0.254244	0.492188	0.641761	0.778217	0.984375	1.23047	1.25484	1.39212	1.54646	1.74015	1.96875	2.32164	2.86992	3.82552	5.02257	6.86064	15.8206
0	0.246094	0.254631	0.492188	0.65268	0.778217	0.992188	1.23047	1.25484	1.39212	1.55643	1.74015	1.96875	2.32164	2.86992	3.82748	5.02257	6.89502	15.8769
0	0.246094	0.254982	0.492188	0.652981	0.778217	0.992188	1.23047	1.25484	1.39212	1.55643	1.74015	1.96875	2.32164	2.8927	3.83219	5.02257	6.90512	15.9126
0	0.246094	0.255223	0.492188	0.653113	0.778217	0.992188	1.23047	1.25484	1.39212	1.55643	1.74015	1.96875	2.32164	2.8927	3.84411	5.02257	6.94752	16.125
0	0.246094	0.256132	0.492188	0.654317	0.778217	0.992188	1.23047	1.25484	1.39212	1.55643	1.74015	1.96875	2.32164	2.8927	3.84411	5.02257	6.94935	16.3579
0	0.246094	0.257905	0.492188	0.65604	0.778217	0.992188	1.23047	1.25484	1.39212	1.56049	1.74015	1.96875	2.3232	2.90331	3.85072	5.02833	6.99317	16.4901
0	0.246094	0.260029	0.492188	0.660174	0.778217	0.992188	1.23047	1.25484	1.39212	1.5666	1.74015	1.97431	2.32531	2.93659	3.85072	5.04942	6.99963	16.5451
0	0.246094	0.26203	0.492188	0.661505	0.780919	0.992188	1.23047	1.25484	1.39212	1.56879	1.74015	1.98268	2.33465	2.94833	3.85198	5.05918	7.00266	16.5468
0	0.246094	0.263059	0.492188	0.664729	0.784393	0.992188	1.23047	1.25484	1.39302	1.56879	1.74015	1.98407	2.33465	2.95312	3.86758	5.06738	7.00395	16.7362
0	0.246094	0.264409	0.492188	0.664988	0.784393	0.992188	1.23047	1.25484	1.39509	1.56879	1.74015	1.98407	2.34007	2.95312	3.87462	5.06738	7.03845	16.869
0	0.246094	0.266436	0.492188	0.667616	0.784393	0.992188	1.23047	1.25484	1.40148	1.56909	1.74015	1.98407	2.34007	2.95312	3.88255	5.06738	7.04705	16.9519
0	0.246094	0.266618	0.492188	0.66978	0.784393	0.992188	1.23047	1.25484	1.40317	1.56974	1.74015	1.98407	2.34007	2.95708	3.89108	5.07335	7.05518	16.9965
0	0.246094	0.270646	0.492188	0.670477	0.784393	0.992188	1.23047	1.25484	1.40317	1.57222	1.74015	1.98407	2.34007	2.95753	3.89108	5.07335	7.08562	17.009
0	0.246094	0.271865	0.492188	0.678835	0.784393	0.992188	1.23047	1.25484	1.40317	1.5737	1.74015	1.98407	2.34007	2.96336	3.89108	5.07335	7.10298	17.0303
0	0.246094	0.271991	0.492188	0.681954	0.784393	0.992188	1.23047	1.25484	1.40317	1.57577	1.74015	1.98407	2.34069	2.96336	3.89108	5.07335	7.10731	17.0394
0	0.246094	0.272105	0.492188	0.682197	0.784393	0.992188	1.23047	1.25484	1.40317	1.57577	1.74015	1.98407	2.35318	2.97117	3.89972	5.07335	7.10731	17.1489
0	0.246094	0.273504	0.492188	0.683784	0.784393	0.992188	1.23047	1.25484	1.40317	1.57577	1.74015	1.98407	2.35318	2.97356	3.90154	5.07335	7.1748	17.2299
0	0.246094	0.276716	0.492188	0.696058	0.784393	0.992188	1.23047	1.25484	1.40317	1.57577	1.74015	1.98407	2.35318	2.97587	3.9121	5.07692	7.1748	17.2459
0	0.246094	0.277441	0.492188	0.696058	0.784393	0.992188	1.23047	1.25484	1.40545	1.57577	1.74015	1.98407	2.37688	2.97656	3.92007	5.09966	7.20488	17.3265
0	0.246094	0.27784	0.492188	0.696058	0.784393	0.996265	1.23047	1.25484	1.40864	1.57577	1.74015	1.98438	2.39385	2.97656	3.92197	5.1076	7.21091	17.3276
0	0.246094	0.280645	0.492188	0.696058	0.784393	0.996549	1.23047	1.25484	1.41628	1.57577	1.74015	1.98438	2.3968	2.97656	3.92197	5.1076	7.25413	17.3841
0	0.246094	0.282493	0.492188	0.696058	0.784393	1.0011	1.23047	1.25484	1.41786	1.57577	1.74015	1.98438	2.41535	2.98688	3.92197	5.11322	7.26146	17.6741
0	0.246094	0.284023	0.492188	0.696058	0.784393	1.0101	1.23047	1.25484	1.41906	1.57577	1.74015	1.98438	2.42374	2.98688	3.92197	5.11362	7.30447	18.151
0	0.246094	0.284357	0.492188	0.696058	0.784393	1.01467	1.23047	1.25484	1.4223	1.57577	1.74015	1.98438	2.4319	2.98688	3.93105	5.11362	7.30447	18.1603
0	0.246094	0.286265	0.492188	0.696058	0.784393	1.01467	1.23047	1.25484	1.4262	1.57577	1.74015	1.98438	2.44153	2.98688	3.93113	5.11362	7.31689	18.2325
0	0.246094	0.286807	0.492188	0.696058	0.784393	1.01467	1.23047	1.25484	1.43136	1.57577	1.74015	1.98438	2.44298	2.99386	3.93232	5.11685	7.32474	18.2922
0	0.246094	0.287017	0.492188	0.696058	0.79716	1.01467	1.23047	1.25484	1.43136	1.57577	1.74015	1.98438	2.44298	2.99386	3.9375	5.13859	7.32894	18.3102
0	0.246094	0.287828	0.492188	0.696058	0.802523	1.01467	1.23047	1.25484	1.43452	1.57577	1.74015	1.98438	2.44298	2.99716	3.9375	5.13859	7.36342	18.3451
0	0.246094	0.289592	0.492188	0.696058	0.808932	1.01467	1.23047	1.25484	1.43496	1.57577	1.74015	1.98438	2.44298	2.99716	3.9375	5.13859	7.36662	18.3973
0	0.246094	0.291648	0.492188	0.696058	0.80936	1.01467	1.23047	1.25484	1.43496	1.57577	1.74015	1.98438	2.44298	2.99716	3.9375	5.16506	7.38691	18.5334
0	0.246094	0.296592	0.492188	0.696058	0.809874	1.01467	1.23047	1.25484	1.43496	1.57577	1.74015	1.9914	2.44298	3.00062	3.9375	5.16736	7.40806	18.7803
0	0.246094	0.296828	0.492188	0.696058	0.811415	1.01467	1.23047	1.25484	1.43496	1.57577	1.74015	1.99982	2.44298	3.00396	3.94259	5.16797	7.44001	18.8386
0	0.246094	0.297551	0.492188	0.696058	0.814387	1.01467	1.23047	1.25484	1.43496	1.57577	1.74015	1.99982	2.44718	3.00396	3.94518	5.17382	7.44815	18.8418
0	0.246094	0.298088	0.492188	0.696058	0.815662	1.01467	1.23047	1.25484	1.43496	1.57577	1.74015	1.99982	2.45554	3.00396	3.95651	5.17937	7.47852	18.8907
0	0.246094	0.299283	0.492188	0.696058	0.817607	1.01467	1.23047	1.25484	1.43496	1.57577	1.74015	1.99982	2.45554	3.00887	3.96814	5.18199	7.49214	18.8907
0	0.246094	0.299871	0.492188	0.696058	0.821584	1.01467	1.23047	1.25484	1.43496	1.57577	1.74152	1.99982	2.46094	3.01478	3.96814	5.19135	7.49678	18.8907
0	0.246094	0.300602	0.492188	0.696058	0.831257	1.01467	1.23047	1.25484	1.43496	1.57577	1.75396	2.00506	2.46094	3.01762	3.96814	5.19411	7.51292	18.8907
0	0.246094	0.302583	0.492188	0.696058	0.832949	1.01467	1.23047	1.25484	1.43496	1.57577	1.75396	2.00572	2.46094	3.0278	3.97577	5.21463	7.60902	18.93
0	0.246094	0.3029	0.492188	0.696058	0.833445	1.01467	1.23047	1.25484	1.43496	1.57577	1.75396	2.02934	2.46094	3.0278	3.97577	5.21463	7.63197	18.9881
0	0.246094	0.303997	0.492188	0.696058	0.836894	1.01467	1.23047	1.25484	1.43496	1.57577	1.75396	2.02934	2.46094	3.06678	3.98464	5.21489	7.63641	19.0067
0	0.246094	0.306071	0.492188	0.696058	0.840763	1.01467	1.23047	1.25484	1.43496	1.57577	1.75396	2.04545	2.46094	3.06817	3.99615	5.22044	7.64129	19.0238
0	0.246094	0.30656	0.492188	0.696058	0.84862	1.01467	1.23047	1.25484	1.43496	1.57577	1.75396	2.04545	2.46094	3.06817	3.99964	5.22044	7.64129	19.0738
0	0.246094	0.307755	0.492188	0.696058	0.854978	1.01467	1.23047	1.25484	1.43496	1.57577	1.75396	2.0581	2.46094	3.06817	4.00277	5.22044	7.64477	19.1254
0	0.246094	0.310514	0.492188	0.696058	0.859607	1.01467	1.23047	1.25484	1.43496	1.57577	1.75396	2.06367	2.46094	3.08633	4.00612	5.23563	7.64477	19.1623
0	0.246094	0.310704	0.492188	0.696058	0.861306	1.01467	1.23047	1.25484	1.43496	1.57577	1.75396	2.07723	2.46094	3.09317	4.00612	5.24107	7.70788	19.2536
0	0.246094	0.311715	0.492188	0.696058	0.882594	1.01467	1.23047	1.25484	1.43496	1.57577	1.75396	2.08798	2.46094	3.09617	4.00612	5.24836	7.7651	19.3305
0	0.246094	0.311915	0.492188	0.696058	0.885034	1.01467	1.23047	1.25484	1.43496	1.57577	1.75396	2.09005	2.4655	3.09985	4.00732	5.25346	7.78823	19.343
0	0.246094	0.312471	0.492188	0.696058	0.887304	1.01467	1.23047	1.25484	1.43496	1.57577	1.75396	2.09913	2.47011	3.10802	4.03131	5.26088	7.78883	19.3937
0	0.246094	0.313737	0.492188	0.701583	0.887304	1.01467	1.23047	1.25484	1.43496	1.57577	1.75396	2.10263	2.47321	3.10802	4.03184	5.26088	7.81711	19.4555
0	0.246094	0.314669	0.492188	0.701583	0.887304	1.01467	1.23047	1.25484	1.43496	1.57577	1.75396	2.10263	2.47321	3.12122	4.03624	5.26088	7.82098	19.5346
0	0.246094	0.316109	0.492188	0.701583	0.887304	1.01467	1.23047	1.25484	1.43496	1.57577	1.75396	2.10263	2.47321	3.13757	4.03624	5.28386	7.84148	19.7029
0	0.246094	0.317587	0.492188	0.701583	0.887304	1.01467	1.23047	1.25484	1.43496	1.57577	1.75396	2.10475	2.47727	3.13757	4.03791	5.28386	7.86346	19.8178
0	0.246094	0.321373	0.492188	0.701583	0.887304	1.01467	1.23047	1.25484	1.43496	1.57577	1.75396	2.10475	2.48047	3.15154	4.05386	5.30102	7.86461	19.8483
0	0.246094	0.323173	0.492188	0.701583	0.887304	1.01467	1.23047	1.25484	1.43496	1.57577	1.75396	2.10475	2.48047	3.15154	4.05868	5.30102	7.88305	19.9579
0	0.246094	0.323287	0.492188	0.701583	0.887304	1.01467	1.23047	1.25484	1.43496	1.57577	1.75396	2.10475	2.48047	3.15154	4.05868	5.30102	7.88305	20.0933
0	0.246094	0.327142	0.492188	0.701583	0.887304	1.01467	1.23047	1.25484	1.43496	1.57577	1.75396	2.10475	2.48047	3.15154	4.06712	5.30102	7.88667	20.1812
0	0.246094	0.327207	0.492188	0.703209	0.887304	1.01467	1.23047	1.25484	1.43496	1.57577	1.75396	2.10607	2.48047	3.15154	4.06827	5.30102	7.89475	20.1932
0	0.246094	0.328431	0.492188	0.703942	0.887304	1.01467	1.23047	1.25484	1.43496	1.57577	1.75396	2.11427	2.48047	3.16984	4.07358	5.30843	7.90953	20.3111
0	0.246094	0.331559	0.492188	0.706847	0.887304	1.01467	1.23047	1.25484	1.43496	1.57577	1.75396	2.11698	2.48047	3.17655	4.07358	5.31243	7.91301	20.364
0	0.246094	0.332418	0.492188	0.711682	0.887304	1.01467	1.23047	1.25484	1.43496	1.57577	1.75396	2.11698	2.48047	3.17765	4.09089	5.31243	7.97828	20.4199
0	0.246094	0.33324	0.492188	0.712173	0.887304	1.01481	1.23047	1.25484	1.43496	1.57577	1.75396	2.11698	2.48134	3.17874	4.09502	5.31243	7.98573	20.4199
0	0.246094	0.333853	0.492188	0.718526	0.887304	1.01488	1.23047	1.25484	1.43496	1.57577	1.76179	2.11698	2.49284	3.19258	4.09699	5.31243	8.00696	20.6264
0	0.246094	0.335512	0.492188	0.723318	0.887304	1.01658	1.23047	1.25484	1.43496	1.57577	1.76557	2.11698	2.49284	3.19922	4.10591	5.32579	8.09865	20.6416
0	0.246094	0.337513	0.492188	0.724293	0.887304	1.01954	1.23047	1.2648	1.43496	1.57577	1.77461	2.11698	2.49793	3.19922	4.10591	5.32579	8.10877	20.6558
0	0.246094	0.33837	0.492188	0.732055	0.887304	1.02272	1.23047	1.2648	1.43496	1.57837	1.77461	2.11698	2.50967	3.19922	4.11146	5.33657	8.11738	20.6748
0	0.246094	0.339692	0.492188	0.733317	0.887304	1.02272	1.23047	1.2648	1.43496	1.57871	1.77461	2.11698	2.50967	3.19922	4.11228	5.3546	8.12482	20.6953
0	0.246094	0.342344	0.492188	0.738281	0.887304	1.02272	1.23047	1.2648	1.43496	1.57987	1.77461	2.11698	2.51523	3.20867	4.12528	5.3546	8.12519	20.7435
0	0.246094	0.344497	0.492188	0.738281	0.887304	1.02272	1.23047	1.2648	1.43496	1.58111	1.78609	2.11698	2.52959	3.21054	4.12528	5.3546	8.13654	20.7486
0	0.246094	0.348029	0.492188	0.738281	0.887304	1.02272	1.23047	1.2648	1.43496	1.58158	1.78869	2.11698	2.52959	3.22461	4.12832	5.3546	8.15524	20.8787
0	0.246094	0.348029	0.492188	0.738281	0.887304	1.02272	1.23047	1.2648	1.43496	1.58787	1.78869	2.11698	2.52959	3.23414	4.12832	5.35803	8.18054	20.8948
0	0.246094	0.348029	0.492188	0.738281	0.887304	1.02272	1.23047	1.2648	1.43496	1.58827	1.78869	2.11698	2.53369	3.23414	4.12999	5.36607	8.20431	20.918
0	0.246094	0.348029	0.492188	0.738281	0.887304	1.02272	1.23047	1.2648	1.43496	1.58827	1.78869	2.11698	2.53369	3.23414	4.13969	5.36883	8.21167	20.9302
0	0.246094	0.348029	0.492188	0.738281	0.887304	1.02272	1.23047	1.2648	1.43496	1.58827	1.79159	2.11698	2.53369	3.23414	4.13978	5.37477	8.21181	20.9353
0	0.246094	0.348029	0.492188	0.738281	0.887304	1.02272	1.23047	1.2648	1.43496	1.58827	1.79258	2.11698	2.53369	3.23686	4.15536	5.37477	8.21181	20.9684
0	0.246094	0.348029	0.492188	0.738281	0.887304	1.02272	1.23047	1.2648	1.43496	1.58827	1.79386	2.11698	2.53369	3.26652	4.15802	5.39095	8.21378	21.0622
0	0.246094	0.348029	0.492188	0.738281	0.887304	1.02327	1.23047	1.2648	1.43496	1.58827	1.79792	2.11698	2.53369	3.26725	4.17635	5.39726	8.23348	21.084
0	0.246094	0.348029	0.492188	0.738281	0.890493	1.03455	1.23047	1.2648	1.43496	1.58827	1.79793	2.11698	2.53369	3.2833	4.17668	5.39726	8.25665	21.1423
0	0.246094	0.348029	0.492188	0.738281	0.894346	1.03911	1.23047	1.2648	1.43496	1.58827	1.80072	2.11698	2.53369	3.2833	4.18359	5.39726	8.27331	21.1598
0	0.246094	0.348029	0.492188	0.738281	0.894346	1.04279	1.23047	1.26567	1.43496	1.58827	1.80179	2.11698	2.53369	3.30692	4.18359	5.39726	8.2887	21.3436
0	0.246094	0.348029	0.492188	0.738281	0.894346	1.04409	1.23047	1.27434	1.43496	1.58827	1.80992	2.11702	2.54555	3.31085	4.19083	5.39726	8.29117	21.3918
0	0.246094	0.348029	0.492188	0.738281	0.894346	1.04409	1.23047	1.27746	1.43496	1.58827	1.82033	2.11931	2.5538	3.31085	4.20525	5.39726	8.29418	21.4328
0	0.246094	0.348029	0.492188	0.738281	0.894346	1.04409	1.23047	1.28125	1.43551	1.58827	1.82304	2.12675	2.5538	3.31525	4.21245	5.39726	8.31605	21.4328
0	0.246094	0.348029	0.492188	0.738281	0.894346	1.04409	1.23047	1.28398	1.44093	1.58827	1.83497	2.13378	2.5538	3.3279	4.2168	5.40286	8.3376	21.4878
0	0.246094	0.348029	0.492188	0.738281	0.894346	1.04409	1.23047	1.28591	1.44479	1.58827	1.84313	2.13378	2.5538	3.33713	4.22668	5.40286	8.35632	21.4878
0	0.246094	0.348029	0.493485	0.738281	0.894346	1.04409	1.23047	1.28741	1.44555	1.58827	1.85907	2.13378	2.5538	3.33713	4.22966	5.40286	8.39337	21.589
0	0.246094	0.348029	0.493505	0.738281	0.894346	1.04409	1.23047	1.2879	1.44635	1.58827	1.86671	2.13378	2.5538	3.33713	4.23396	5.41406	8.3997	21.7358
0	0.246094	0.348029	0.495302	0.738281	0.894346	1.04409	1.23047	1.2947	1.44635	1.58827	1.87213	2.13378	2.5538	3.33713	4.23795	5.41439	8.43724	21.7956
0	0.246094	0.348029	0.496094	0.738281	0.894346	1.04409	1.23047	1.29659	1.44635	1.58827	1.87419	2.13378	2.5538	3.34724	4.23863	5.41965	8.44861	21.8248
0	0.246094	0.348029	0.496094	0.738281	0.894346	1.04409	1.23047	1.30644	1.44635	1.58827	1.87419	2.13378	2.56929	3.34724	4.24824	5.41965	8.47506	21.8636
0	0.246094	0.348029	0.496094	0.738281	0.894346	1.04409	1.23047	1.31349	1.44635	1.58827	1.87419	2.15106	2.56929	3.35131	4.25211	5.43639	8.5243	21.8913
0	0.246094	0.348029	0.496094	0.738281	0.894346	1.04409	1.23047	1.3214	1.44635	1.58827	1.8783	2.15349	2.58039	3.3738	4.26089	5.46267	8.54233	21.97
0	0.246094	0.348029	0.496094	0.738281	0.894346	1.04409	1.23047	1.32313	1.44635	1.58827	1.88907	2.15599	2.5874	3.3738	4.2727	5.46267	8.56038	22.2003
0	0.246094	0.348029	0.496094	0.738281	0.894346	1.04409	1.23047	1.32526	1.44635	1.60654	1.88907	2.15825	2.58969	3.3738	4.29289	5.46417	8.56038	22.2099
0	0.246094	0.348029	0.496094	0.738281	0.894824	1.04409	1.23047	1.32526	1.44635	1.6091	1.88907	2.16291	2.58969	3.37399	4.29784	5.46417	8.5675	22.2112
0	0.246094	0.348029	0.496094	0.738281	0.896336	1.04409	1.23047	1.32526	1.44635	1.61791	1.88907	2.17304	2.58969	3.38207	4.29784	5.49075	8.59618	22.2358
0	0.246094	0.348029	0.496094	0.738281	0.898903	1.04409	1.23047	1.32526	1.44635	1.62162	1.88907	2.17341	2.61365	3.38809	4.29784	5.50282	8.63984	22.3133
0	0.246094	0.348029	0.496094	0.738281	0.90595	1.04495	1.23047	1.32526	1.44635	1.62432	1.90723	2.17635	2.61601	3.40149	4.29784	5.50282	8.6639	22.3959
0	0.246094	0.348029	0.496094	0.738281	0.906937	1.04707	1.23047	1.32526	1.44635	1.6286	1.90962	2.18533	2.61601	3.40472	4.30488	5.50282	8.6639	22.4067
0	0.246094	0.348029	0.496094	0.738281	0.90762	1.04786	1.23047	1.32526	1.44635	1.62873	1.92205	2.19008	2.6202	3.41767	4.30488	5.53027	8.70769	22.4148
0	0.246094	0.348029	0.496094	0.738281	0.907946	1.04944	1.23047	1.32526	1.44635	1.63033	1.92205	2.19177	2.62334	3.41884	4.30488	5.54541	8.76315	22.5616
0	0.246094	0.348029	0.496094	0.738281	0.908082	1.04974	1.23047	1.32526	1.44635	1.63595	1.92205	2.19492	2.63677	3.42769	4.30593	5.5465	8.76627	22.6219
0	0.246094	0.348029	0.496094	0.738281	0.908293	1.05237	1.23047	1.32526	1.44635	1.65085	1.92205	2.20573	2.63677	3.42769	4.33195	5.54761	8.7978	22.7061
0	0.246094	0.348029	0.496094	0.738281	0.909753	1.05237	1.23047	1.32526	1.44635	1.65085	1.92205	2.20748	2.63774	3.44164	4.33733	5.55213	8.80828	22.888
0	0.246094	0.348029	0.496094	0.738281	0.909925	1.05237	1.23047	1.32526	1.44635	1.65085	1.92205	2.21484	2.65051	3.44531	4.33905	5.55213	8.94346	22.9699
0	0.246094	0.348029	0.496094	0.738281	0.910427	1.05237	1.23047	1.32526	1.44635	1.65085	1.92205	2.21484	2.66191	3.44531	4.34514	5.57416	8.94346	23.3634
0	0.246094	0.348029	0.496094	0.738281	0.912481	1.05237	1.23047	1.32526	1.44635	1.65085	1.92205	2.21484	2.66191	3.44531	4.36079	5.57416	8.94346	23.6374
0	0.246094	0.348029	0.496094	0.738281	0.913532	1.05237	1.23047	1.32526	1.44635	1.65085	1.92205	2.21484	2.6712	3.44598	4.36079	5.57416	8.94442	23.6762
0	0.246094	0.348029	0.496094	0.738281	0.916153	1.05237	1.23047	1.32526	1.44635	1.65085	1.92205	2.21793	2.67155	3.44614	4.38157	5.57416	8.9478	23.9015
0	0.246094	0.348029	0.496094	0.738281	0.918072	1.05237	1.23047	1.32526	1.45054	1.65085	1.92205	2.2186	2.67155	3.45399	4.3884	5.57933	8.98158	24.0543
0	0.246094	0.348029	0.496094	0.738281	0.918204	1.05787	1.23047	1.32526	1.45952	1.65085	1.92205	2.2186	2.67155	3.45409	4.39229	5.57933	8.98806	24.1385
0	0.246094	0.348029	0.496094	0.738281	0.918563	1.06193	1.23047	1.32526	1.47412	1.65085	1.92205	2.2186	2.70204	3.45409	4.3954	5.57933	8.99149	24.4774
0	0.246094	0.348029	0.496094	0.738281	0.918814	1.06415	1.23873	1.32526	1.47447	1.65385	1.92205	2.2186	2.70703	3.45489	4.41635	5.57933	9.01882	24.5724
0	0.246094	0.348029	0.496094	0.738281	0.919253	1.07507	1.24023	1.32526	1.47656	1.65648	1.92205	2.22007	2.70703	3.45489	4.42969	5.58372	9.0253	24.9151
0	0.246094	0.348029	0.496094	0.738281	0.928046	1.08883	1.24023	1.32526	1.47656	1.65762	1.92205	2.22462	2.70703	3.45489	4.42969	5.6118	9.02866	25.0121
0	0.246094	0.348029	0.496094	0.738281	0.928828	1.08942	1.24023	1.32526	1.47656	1.65915	1.92205	2.22462	2.70703	3.45489	4.43652	5.6118	9.02866	25.1462
0	0.246094	0.348029	0.496094	0.738281	0.932111	1.09212	1.24023	1.32526	1.47656	1.66395	1.92205	2.22594	2.70703	3.45489	4.43652	5.6118	9.02866	25.1979
0	0.246094	0.348029	0.496094	0.738281	0.933099	1.09306	1.24023	1.32526	1.47656	1.66395	1.93421	2.22847	2.70703	3.48029	4.43652	5.6118	9.02904	25.2615
0	0.246094	0.348029	0.496094	0.738281	0.93515	1.0961	1.24023	1.32526	1.47656	1.66395	1.93731	2.22847	2.70703	3.48029	4.43652	5.6118	9.03536	25.5618
0	0.246094	0.348029	0.496094	0.738281	0.936632	1.09743	1.24023	1.32526	1.47656	1.66395	1.93731	2.23242	2.71819	3.48029	4.43652	5.65634	9.07549	25.8469
0	0.246094	0.348029	0.496094	0.738281	0.938427	1.10056	1.24023	1.32526	1.47656	1.66718	1.93731	2.23242	2.71819	3.48029	4.43652	5.65634	9.07883	25.8691
0	0.246094	0.348029	0.496094	0.738281	0.938977	1.10056	1.24023	1.32526	1.47656	1.68513	1.93731	2.23242	2.7189	3.48029	4.4372	5.65634	9.10547	26.5236
0	0.246094	0.348029	0.496094	0.738281	0.939283	1.10056	1.24023	1.32526	1.47656	1.6953	1.93731	2.23242	2.72092	3.48029	4.4372	5.65634	9.10547	26.8547
0	0.246094	0.348029	0.496094	0.738281	0.93943	1.10056	1.24023	1.32526	1.47656	1.70143	1.93731	2.23242	2.72852	3.4815	4.4372	5.66016	9.10547	27.0143
0	0.246094	0.348029	0.496094	0.738281	0.940133	1.10056	1.24023	1.32526	1.47656	1.70357	1.93731	2.23659	2.72852	3.4815	4.4372	5.66178	9.10707	27.0882
0	0.246094	0.348029	0.496094	0.738281	0.943379	1.10056	1.24023	1.32526	1.47656	1.70611	1.93731	2.24616	2.72852	3.49065	4.45695	5.66178	9.10707	27.1053
0	0.246094	0.348029	0.496094	0.738281	0.943846	1.10056	1.24023	1.32526	1.47656	1.70731	1.93731	2.24616	2.72852	3.4908	4.47173	5.66178	9.15522	27.1875
0	0.246094	0.348029	0.496094	0.738281	0.946161	1.10056	1.24023	1.32526	1.47656	1.71968	1.93731	2.24616	2.72937	3.50791	4.47173	5.6655	9.18823	27.302
0	0.246094	0.348029	0.496094	0.738281	0.949218	1.10056	1.24023	1.32526	1.47656	1.72073	1.93731	2.24616	2.73977	3.50791	4.47173	5.66721	9.18823	27.8631
0	0.246094	0.348029	0.496094	0.738281	0.950372	1.10056	1.24023	1.32526	1.47656	1.72266	1.93731	2.24616	2.73977	3.51622	4.47173	5.66721	9.30286	27.8967
0	0.246094	0.348029	0.496094	0.738281	0.95326	1.10056	1.24023	1.32526	1.47656	1.72266	1.93731	2.25141	2.73977	3.52353	4.47173	5.68152	9.35041	28.0655
0	0.246094	0.348029	0.496094	0.738281	0.959147	1.10056	1.24023	1.32526	1.47656	1.72266	1.93731	2.26887	2.74172	3.52353	4.47173	5.68152	9.36028	28.5734
0	0.246094	0.348029	0.496094	0.738281	0.959888	1.10056	1.24023	1.32526	1.47656	1.72266	1.93731	2.26887	2.74712	3.52353	4.47367	5.7081	9.43217	29.0401
0	0.246094	0.348029	0.496094	0.738281	0.960619	1.10056	1.24023	1.32526	1.47656	1.72266	1.93731	2.26887	2.75141	3.52541	4.49079	5.7081	9.44534	29.3262
0	0.246094	0.348029	0.496094	0.738281	0.960885	1.10056	1.24023	1.32526	1.47656	1.72266	1.93731	2.26887	2.75141	3.55149	4.50303	5.71047	9.45461	29.5769
0	0.246094	0.348029	0.496094	0.738281	0.961631	1.10056	1.24023	1.32526	1.47656	1.72266	1.93731	2.26887	2.75141	3.55149	4.50601	5.71047	9.46742	29.8173
0	0.246094	0.348029	0.496094	0.738281	0.961647	1.10056	1.24023	1.32526	1.48576	1.72266	1.93731	2.26887	2.75141	3.55149	4.51472	5.71047	9.49616	29.841
0	0.246094	0.348029	0.496094	0.738281	0.96464	1.10056	1.24023	1.32526	1.48828	1.72266	1.95335	2.2756	2.75141	3.55848	4.51768	5.72399	9.60081	30.116
0	0.246094	0.348029	0.496094	0.738281	0.966907	1.10056	1.24023	1.32526	1.48828	1.72266	1.95848	2.28688	2.75141	3.56312	4.52438	5.72661	9.61027	30.1731
0	0.246094	0.348029	0.496094	0.738281	0.968444	1.10056	1.24023	1.32526	1.48828	1.72266	1.9599	2.28688	2.75141	3.5737	4.52438	5.72661	9.6611	30.2895
0	0.246094	0.348029	0.496094	0.738281	0.97132	1.10056	1.24023	1.32526	1.48828	1.72266	1.96705	2.28688	2.75141	3.57495	4.52438	5.73368	9.8378	30.3604
0	0.246094	0.348029	0.496094	0.738281	0.974552	1.10056	1.24023	1.33061	1.48828	1.72266	1.96875	2.28688	2.75141	3.57738	4.53774	5.73984	9.84375	30.3903
0	0.246094	0.348029	0.496094	0.738281	0.976866	1.10056	1.24023	1.33577	1.48828	1.72266	1.96875	2.28688	2.75141	3.57738	4.55354	5.73984	9.84718	30.742
0	0.246094	0.348029	0.496094	0.738281	0.977006	1.10056	1.24023	1.33577	1.48828	1.72266	1.96875	2.28688	2.75141	3.58318	4.55354	5.7534	9.85605	30.7863
0	0.246094	0.348029	0.496094	0.738281	0.981272	1.10056	1.24023	1.33577	1.48828	1.72266	1.96875	2.28688	2.75141	3.58318	4.56029	5.76091	9.85605	31.1287
0	0.246094	0.348029	0.496094	0.738281	0.981961	1.10056	1.24023	1.33577	1.48828	1.72266	1.96875	2.28688	2.75141	3.58561	4.56029	5.76091	9.8714	31.2112
0	0.246094	0.348029	0.496094	0.738281	0.984375	1.10056	1.24023	1.33577	1.48828	1.72266	1.96875	2.28688	2.75141	3.59404	4.56029	5.76452	9.92036	31.2607
0	0.246094	0.348029	0.496094	0.738281	0.984375	1.10056	1.24023	1.33577	1.48828	1.73088	1.96875	2.28688	2.75141	3.60229	4.56591	5.76942	9.92188	31.3033
0	0.246094	0.348029	0.496094	0.738281	0.984375	1.10729	1.24023	1.33577	1.48828	1.73327	1.96875	2.28688	2.75141	3.60665	4.57761	5.77154	9.96604	31.3313
0	0.246094	0.348029	0.496094	0.738281	0.984375	1.10735	1.24023	1.33577	1.4901	1.73633	1.96875	2.28688	2.75141	3.60914	4.57761	5.79071	9.96768	31.6161
0	0.246094	0.348029	0.500592	0.738281	0.984375	1.10752	1.24023	1.33577	1.49224	1.73633	1.96875	2.30708	2.75141	3.60923	4.59741	5.79071	9.99909	31.9429
0	0.246094	0.348954	0.50403	0.738281	0.984375	1.1093	1.24023	1.33577	1.49693	1.73633	1.96875	2.31058	2.7573	3.60975	4.59741	5.79082	10.042	32.0158
0	0.246094	0.349672	0.50484	0.738281	0.984375	1.1093	1.24023	1.33577	1.49693	1.73633	1.96875	2.31613	2.77325	3.61378	4.59741	5.79236	10.0557	32.0527
0	0.246094	0.350791	0.510922	0.738281	0.984375	1.1093	1.24023	1.33577	1.49693	1.73633	1.96875	2.31651	2.77325	3.6309	4.60771	5.79236	10.06	32.0595
0	0.246094	0.350791	0.51103	0.738281	0.984375	1.1093	1.24023	1.33577	1.49693	1.73633	1.96875	2.32164	2.77325	3.63353	4.61394	5.79579	10.0898	32.2383
0	0.246094	0.350791	0.516277	0.738281	0.984375	1.1093	1.24023	1.33577	1.49693	1.73633	1.97126	2.32164	2.77325	3.63353	4.62368	5.80802	10.1001	32.4219
0	0.246094	0.350791	0.52163	0.738281	0.984375	1.1093	1.24023	1.33577	1.49693	1.73633	1.97262	2.32164	2.77325	3.63482	4.6339	5.80802	10.1018	32.4555
0	0.246094	0.350791	0.522251	0.738281	0.984375	1.1093	1.24023	1.33577	1.49693	1.73633	1.9729	2.32164	2.77325	3.65628	4.6339	5.81192	10.1168	32.5179
0	0.246094	0.350791	0.524009	0.738281	0.984375	1.1093	1.24023	1.33577	1.49693	1.73633	1.97845	2.32164	2.77325	3.65811	4.64329	5.81509	10.1348	32.5607
0	0.246094	0.350791	0.525052	0.738281	0.984375	1.1093	1.24023	1.33577	1.49693	1.73904	1.9829	2.32164	2.77325	3.65845	4.66038	5.83403	10.1468	33.0902
0	0.246094	0.350791	0.528313	0.738281	0.984375	1.1093	1.24023	1.33608	1.49693	1.74015	1.98407	2.32164	2.77345	3.65845	4.66038	5.83403	10.179	33.4117
0	0.246094	0.350791	0.529041	0.738281	0.984375	1.1093	1.24023	1.35656	1.49693	1.74015	1.98407	2.32164	2.78296	3.65845	4.6693	5.83833	10.1971	33.5456
0	0.246094	0.350791	0.535133	0.738281	0.984375	1.1093	1.24023	1.35667	1.50165	1.74015	1.98407	2.33062	2.78423	3.65845	4.6693	5.83833	10.2062	33.6177
0	0.246094	0.350791	0.536711	0.738281	0.984375	1.1093	1.24436	1.36243	1.5083	1.74015	1.98407	2.33465	2.78423	3.65845	4.6693	5.84958	10.2661	33.8081
0	0.246094	0.350791	0.537716	0.738281	0.984375	1.1093	1.24723	1.37213	1.50859	1.74015	1.98407	2.34007	2.8059	3.65845	4.67578	5.89601	10.2853	34.2636
0	0.246094	0.350791	0.54037	0.738281	0.984375	1.1093	1.25016	1.37301	1.50881	1.74015	1.98407	2.34007	2.8059	3.65845	4.67578	5.89601	10.3171	34.3343
0	0.246094	0.350791	0.540819	0.738281	0.984375	1.10947	1.25484	1.38567	1.50881	1.74015	1.98407	2.34007	2.8059	3.65845	4.67578	5.90625	10.3193	34.3827
0	0.246094	0.350791	0.541214	0.738281	0.984375	1.11482	1.25484	1.38767	1.50881	1.74015	1.98407	2.34721	2.8059	3.65845	4.67578	5.90625	10.3389	34.4751
0	0.246094	0.350791	0.543041	0.738281	0.984375	1.12659	1.25484	1.3921	1.50881	1.74015	1.98438	2.35318	2.80633	3.66324	4.67578	5.90625	10.3389	34.7071
0	0.246094	0.350791	0.550282	0.738281	0.984375	1.12783	1.25484	1.39212	1.50881	1.74015	1.98438	2.35318	2.81318	3.66999	4.68014	5.90625	10.3498	34.7507
0	0.246094	0.350791	0.550282	0.738281	0.984375	1.12913	1.25484	1.39212	1.50881	1.74015	1.98438	2.35318	2.82817	3.67494	4.68225	5.90625	10.3506	34.7768
0	0.246094	0.350791	0.550282	0.738281	0.984375	1.131	1.25484	1.39212	1.51411	1.74015	1.98438	2.35318	2.82817	3.68748	4.68225	5.91137	10.3506	35.0051
0	0.246094	0.350791	0.550282	0.738281	0.984375	1.13163	1.25484	1.39212	1.51858	1.74015	1.98438	2.36292	2.82817	3.68748	4.68225	5.9165	10.3586	35.0198
0	0.246094	0.350791	0.550282	0.738281	0.984375	1.13399	1.25484	1.39212	1.52437	1.74015	1.98438	2.38938	2.82817	3.68748	4.68225	5.9165	10.3617	35.0975
0	0.246094	0.350791	0.550282	0.738281	0.984375	1.14098	1.25484	1.39212	1.52833	1.74015	1.98438	2.38947	2.82817	3.69101	4.68735	5.94712	10.3623	35.3357
0	0.246094	0.350791	0.550282	0.738281	0.984375	1.14273	1.25484	1.39212	1.54518	1.74015	1.98438	2.41695	2.82817	3.69141	4.69349	5.95221	10.3647	35.5365
0	0.246094	0.350791	0.550282	0.738281	0.984375	1.14447	1.25484	1.39212	1.54546	1.74015	1.98438	2.42374	2.83119	3.69141	4.70161	5.95221	10.3884	36.1364
0	0.246094	0.350791	0.550282	0.738281	0.984375	1.1489	1.25484	1.39212	1.54716	1.74015	1.98438	2.42374	2.84453	3.69141	4.70161	5.9573	10.4209	36.6118
0	0.246094	0.350791	0.550282	0.738281	0.984375	1.15131	1.25484	1.39314	1.55643	1.74015	1.98438	2.42647	2.84525	3.69141	4.70161	5.9573	10.5022	37.0549
0	0.246094	0.350791	0.550282	0.738281	0.984375	1.16047	1.25484	1.39572	1.55643	1.74015	1.98438	2.43472	2.86637	3.69141	4.70161	5.95829	10.526	37.2773
0	0.246094	0.350791	0.550282	0.738281	0.984375	1.16313	1.25484	1.39628	1.55643	1.74015	1.99982	2.4362	2.87998	3.69141	4.70636	5.96345	10.5677	37.3187
0	0.246094	0.353146	0.550282	0.742144	0.984375	1.16462	1.25484	1.39833	1.55643	1.74015	1.99982	2.4362	2.88045	3.69141	4.70636	5.97376	10.5677	37.6266
0	0.246094	0.355769	0.550282	0.743167	0.984375	1.16823	1.25484	1.40258	1.55643	1.74015	1.99982	2.44298	2.8927	3.69141	4.71941	5.97376	10.582	37.7816
0	0.246094	0.356266	0.550282	0.744141	0.984375	1.17523	1.25484	1.40317	1.5587	1.74015	1.99982	2.44298	2.8927	3.69141	4.72052	5.99945	10.5849	37.8769
0	0.246094	0.356857	0.550282	0.744141	0.984375	1.17546	1.25484	1.40317	1.56879	1.74015	1.99982	2.44298	2.8927	3.69141	4.72731	6.00791	10.5908	38.1445
0.00692679	0.246094	0.361992	0.550282	0.744141	0.984375	1.17658	1.25484	1.40317	1.56879	1.74015	1.99982	2.44298	2.90043	3.69585	4.73371	6.07807	10.5935	38.1453
0.00692679	0.246094	0.362108	0.550282	0.744141	0.984375	1.17743	1.25484	1.40317	1.56879	1.74015	1.99982	2.44298	2.90331	3.69801	4.73371	6.07807	10.6053	38.2262
0.00759709	0.246094	0.36927	0.550282	0.744141	0.984375	1.18222	1.25484	1.40317	1.57518	1.74015	1.99982	2.45554	2.90331	3.6996	4.73893	6.07807	10.6406	38.3227
0.00809682	0.246094	0.371165	0.550282	0.744141	0.984375	1.18454	1.25484	1.40317	1.57577	1.74203	2.00075	2.46094	2.91761	3.6996	4.75286	6.12631	10.6545	38.4741
0.0135231	0.246094	0.372372	0.550282	0.744141	0.984375	1.1866	1.25484	1.40317	1.57577	1.74354	2.00572	2.46094	2.93697	3.6996	4.75286	6.1362	10.6619	38.5268
0.0190371	0.246094	0.378746	0.550282	0.744141	0.984375	1.19711	1.25484	1.40317	1.57577	1.75152	2.01494	2.46094	2.94834	3.6996	4.77128	6.13634	10.7344	38.5551
0.0223259	0.246094	0.378969	0.550282	0.744141	0.984375	1.20539	1.25484	1.40317	1.57577	1.75396	2.01836	2.46094	2.95312	3.6996	4.77128	6.14135	10.7419	39.0886
0.0255551	0.246094	0.38124	0.550282	0.744141	0.984375	1.2134	1.25484	1.40349	1.57577	1.75396	2.02193	2.46094	2.95312	3.6996	4.77828	6.15234	10.7451	39.2643
0.0256363	0.246094	0.382011	0.550282	0.744141	0.984375	1.21613	1.25484	1.40616	1.57577	1.75396	2.02282	2.46094	2.95312	3.70777	4.77828	6.15234	10.7499	39.375
0.0259194	0.246094	0.384632	0.550282	0.744141	0.984375	1.21671	1.25484	1.40863	1.57577	1.75396	2.02934	2.46094	2.95312	3.7207	4.79058	6.15234	10.7789	39.4395
0.028282	0.246094	0.385045	0.550282	0.744141	0.984375	1.22204	1.25484	1.41205	1.57577	1.75396	2.02934	2.46094	2.95312	3.7207	4.79058	6.16709	10.7861	39.7038
0.0288177	0.246094	0.385955	0.550282	0.744141	0.984375	1.22229	1.25484	1.41687	1.57577	1.75396	2.03836	2.46094	2.95371	3.72407	4.79846	6.20117	10.8064	39.7455
0.0322442	0.246094	0.386407	0.550282	0.744141	0.984375	1.22664	1.25484	1.41741	1.57577	1.75396	2.03849	2.46094	2.96058	3.72407	4.80723	6.20613	10.8728	40.2456
0.0338895	0.246094	0.388679	0.550282	0.744141	0.984375	1.22864	1.25484	1.42229	1.57577	1.75396	2.04545	2.46094	2.96336	3.72407	4.8162	6.21079	10.8971	40.3601
0.0353453	0.246094	0.388868	0.550282	0.744141	0.984375	1.23047	1.25484	1.43496	1.57577	1.75396	2.04545	2.46094	2.96336	3.72407	4.8162	6.21113	10.9343	40.9449
0.0371921	0.246094	0.389534	0.550282	0.744141	0.984375	1.23047	1.25484	1.43496	1.57577	1.75396	2.04545	2.46094	2.96336	3.72407	4.83343	6.21604	10.9506	40.9648
0.0395364	0.246094	0.389734	0.550282	0.744141	0.984375	1.23047	1.25484	1.43496	1.57577	1.75396	2.04545	2.47321	2.96336	3.74839	4.83462	6.22471	11.0056	41.3445
0.0398376	0.246094	0.393937	0.550282	0.744141	0.984375	1.23047	1.25484	1.43496	1.57577	1.75396	2.0581	2.47321	2.96336	3.74839	4.83498	6.22573	11.0095	42.3374
0.0421041	0.246094	0.394175	0.550282	0.744141	0.984375	1.23047	1.25484	1.43496	1.57577	1.75396	2.06197	2.47321	2.97356	3.75466	4.83498	6.22573	11.0179	42.386
0.0422485	0.246094	0.394385	0.550282	0.744141	0.984375	1.23047	1.25484	1.43496	1.57577	1.75396	2.07076	2.47321	2.97356	3.75646	4.83498	6.2306	11.0179	42.3982
0.0427392	0.246094	0.400334	0.550282	0.744141	0.984375	1.23047	1.25484	1.43496	1.57577	1.75396	2.08671	2.48047	2.97356	3.75687	4.84748	6.2306	11.0777	42.4289
0.0429417	0.246094	0.400669	0.550282	0.744141	0.984375	1.23047	1.25484	1.43496	1.57577	1.75396	2.08817	2.48047	2.97656	3.75972	4.84748	6.23314	11.0852	43.1177
0.0456044	0.246094	0.401067	0.550282	0.744141	0.984375	1.23047	1.25484	1.43496	1.57577	1.75396	2.09634	2.48047	2.97656	3.76202	4.87335	6.24566	11.1043	43.5148
0.0471737	0.246094	0.401686	0.550282	0.744141	0.984375	1.23047	1.25484	1.43496	1.57577	1.75396	2.10263	2.48047	2.97656	3.76451	4.87335	6.27418	11.1399	43.9524
0.0492101	0.246094	0.405254	0.550282	0.744141	0.984375	1.23047	1.25484	1.43496	1.57577	1.75396	2.10263	2.48047	2.98688	3.76451	4.87335	6.27418	11.1424	44.2052
0.0496018	0.246094	0.406131	0.550282	0.744141	0.984375	1.23047	1.25484	1.43496	1.57577	1.75396	2.10263	2.48047	2.98688	3.76451	4.88482	6.30788	11.1428	44.2593
0.0508304	0.246094	0.410519	0.550282	0.744141	0.984375	1.23047	1.25484	1.43496	1.57577	1.75396	2.10263	2.48047	2.98688	3.76451	4.89225	6.30788	11.1731	44.7755
0.0509866	0.246094	0.410971	0.550282	0.744141	0.984375	1.23047	1.25484	1.43496	1.57577	1.75396	2.10323	2.48311	2.98688	3.77454	4.89225	6.32398	11.1924	44.9227
0.0513662	0.246094	0.412076	0.550282	0.744141	0.984375	1.23047	1.25484	1.43496	1.57577	1.75396	2.10475	2.49284	2.98688	3.77814	4.90338	6.32398	11.1975	44.9436
0.0541341	0.246094	0.412952	0.550282	0.744141	0.984375	1.23047	1.25484	1.43496	1.57577	1.75396	2.10475	2.50967	2.98688	3.77835	4.90338	6.32705	11.2236	45.1983
0.05569	0.246094	0.413115	0.550282	0.744141	0.984375	1.23047	1.25484	1.43496	1.57577	1.75396	2.10475	2.50967	2.98688	3.78627	4.90783	6.32792	11.2281	45.4155
0.0573427	0.246094	0.414297	0.550282	0.744141	0.984375	1.23047	1.25484	1.43496	1.57577	1.75396	2.11698	2.50967	2.99386	3.78627	4.91448	6.33856	11.2472	45.4688
0.0586195	0.246094	0.418012	0.550282	0.744141	0.992188	1.23047	1.25484	1.43496	1.57577	1.75396	2.11698	2.51462	2.99386	3.78898	4.92188	6.35094	11.25	45.5406
0.060369	0.246094	0.418954	0.550282	0.744141	0.992188	1.23047	1.25484	1.43496	1.57577	1.75396	2.11698	2.52959	2.99386	3.79342	4.92188	6.35794	11.331	45.8798
0.0604481	0.246094	0.418993	0.550282	0.745018	0.992188	1.23047	1.25484	1.43496	1.57577	1.75396	2.11698	2.52959	2.99716	3.79439	4.92188	6.37375	11.3514	45.9642
0.0604946	0.246094	0.419178	0.550282	0.747401	0.992188	1.23047	1.25484	1.43496	1.57577	1.76365	2.11698	2.52959	2.99716	3.81868	4.92359	6.37727	11.4021	46.4459
0.060772	0.246094	0.420588	0.550282	0.748544	0.992188	1.23047	1.25484	1.43496	1.57577	1.77321	2.11698	2.52959	2.99716	3.8204	4.92802	6.37727	11.448	46.7403
0.0609278	0.246094	0.422511	0.550282	0.749054	0.992188	1.23047	1.25484	1.43496	1.57577	1.77461	2.11698	2.52959	2.99716	3.8204	4.94642	6.38897	11.5025	47.2763
0.061504	0.246094	0.42337	0.550282	0.749929	0.992188	1.23047	1.25484	1.43496	1.57577	1.77461	2.11698	2.53369	3.00396	3.8204	4.94642	6.39261	11.5528	47.2916
0.0618357	0.246094	0.425841	0.550282	0.750564	0.992188	1.23047	1.25484	1.43496	1.57577	1.78869	2.11698	2.53369	3.01371	3.8204	4.94642	6.39844	11.5814	47.4138
0.0626822	0.246094	0.428619	0.550282	0.751502	0.992188	1.23047	1.25484	1.43496	1.57577	1.78869	2.11698	2.53369	3.01762	3.8204	4.95254	6.40134	11.6317	47.4348
0.0627418	0.246094	0.428727	0.550282	0.753619	0.992188	1.23047	1.25484	1.43496	1.57577	1.78869	2.11698	2.53369	3.02086	3.8204	4.95482	6.40317	11.6341	47.4425
0.0633036	0.246094	0.431877	0.550282	0.753981	0.992188	1.23047	1.25897	1.43496	1.57577	1.78869	2.11698	2.53369	3.02579	3.8204	4.97055	6.41753	11.6733	47.8037
0.0654325	0.246094	0.434856	0.550282	0.758721	0.992188	1.23047	1.25988	1.43496	1.57577	1.78869	2.11698	2.53369	3.04401	3.8368	4.97694	6.43489	11.6872	48.069
0.0667339	0.246094	0.43714	0.550282	0.764545	0.992188	1.23047	1.26106	1.43496	1.57577	1.78869	2.11931	2.53369	3.0502	3.84411	4.97694	6.43967	11.7041	48.1363
0.0668217	0.246094	0.438596	0.550282	0.765781	0.992188	1.23047	1.26448	1.43496	1.5777	1.78869	2.11931	2.53369	3.05472	3.84411	4.98302	6.46827	11.7659	48.1363
0.0672879	0.246094	0.438663	0.550282	0.767903	0.992188	1.23047	1.2648	1.43496	1.58008	1.79159	2.11931	2.53369	3.06817	3.84411	4.98302	6.52802	11.7805	48.2093
0.0677918	0.246094	0.447852	0.550282	0.773663	0.992188	1.23047	1.2648	1.43496	1.58529	1.79159	2.11931	2.53369	3.08355	3.84411	4.98302	6.53887	11.7868	48.3109
0.0698641	0.246094	0.453423	0.550282	0.774121	0.992188	1.23047	1.2648	1.43496	1.58827	1.79159	2.11931	2.53369	3.10802	3.85305	4.98555	6.53887	11.8467	48.3754
0.0701744	0.246094	0.45418	0.550282	0.775525	0.992188	1.23047	1.2648	1.43496	1.58827	1.79213	2.12159	2.53369	3.10802	3.86236	4.99036	6.53887	11.9886	48.9139
0.0701829	0.246094	0.454524	0.550282	0.776077	0.992188	1.23047	1.2648	1.43496	1.58827	1.79596	2.1268	2.53369	3.10802	3.86718	4.99185	6.56739	11.9935	49.077
0.0713	0.246094	0.456586	0.550282	0.776703	0.992188	1.23047	1.2648	1.43496	1.58827	1.80581	2.13217	2.53369	3.1127	3.87364	4.99185	6.59203	12.0092	49.433
0.073492	0.246094	0.456619	0.550282	0.778061	0.992188	1.23047	1.2648	1.43496	1.58827	1.80581	2.13361	2.53369	3.11287	3.88941	4.99185	6.60339	12.0092	49.5945
0.0735339	0.246094	0.458371	0.550282	0.778217	0.992188	1.23047	1.2648	1.43496	1.58827	1.80581	2.13378	2.54075	3.1134	3.89108	4.99185	6.62628	12.0206	50.7055
0.0736674	0.246094	0.459694	0.550282	0.778217	0.992188	1.23047	1.2648	1.44635	1.58827	1.80581	2.13378	2.5538	3.11664	3.89108	4.99775	6.62628	12.0686	50.8248
0.0745385	0.246094	0.462377	0.550282	0.778217	0.992188	1.23047	1.2648	1.44635	1.58827	1.80581	2.13378	2.5538	3.12681	3.89108	5.00592	6.62628	12.1036	51.072
0.0753349	0.246094	0.462914	0.550282	0.778217	0.992188	1.23047	1.2648	1.44635	1.58827	1.80581	2.13378	2.5538	3.13226	3.89108	5.01935	6.62628	12.1163	51.2236
0.0773735	0.246094	0.463988	0.550282	0.778217	0.992188	1.23047	1.2648	1.44635	1.58827	1.80581	2.13378	2.5538	3.13226	3.89108	5.01935	6.63742	12.1187	51.2785
0.0784225	0.246094	0.464465	0.550282	0.778217	0.992188	1.23047	1.2648	1.44635	1.58827	1.81575	2.13378	2.5538	3.13757	3.89108	5.01935	6.64229	12.1187	52.7037
0.078543	0.246094	0.464577	0.550282	0.778217	0.992188	1.23047	1.2648	1.44635	1.58827	1.8235	2.13378	2.5538	3.13757	3.89108	5.02257	6.66274	12.134	55.4498
0.0786919	0.246094	0.468985	0.550282	0.778217	0.992188	1.23047	1.2648	1.44635	1.58827	1.82995	2.13378	2.5538	3.15154	3.90777	5.03769	6.67016	12.1429	55.4602
0.0787777	0.246094	0.473061	0.550282	0.778217	0.992188	1.23047	1.2648	1.44635	1.58827	1.83078	2.13378	2.5538	3.15154	3.91019	5.04942	6.68542	12.1644	55.542
0.0791571	0.246094	0.474044	0.55465	0.778217	0.992188	1.23047	1.2648	1.44635	1.58827	1.83953	2.14141	2.5538	3.15154	3.92031	5.04942	6.69447	12.2207	56.4719
0.0791628	0.246094	0.476002	0.55465	0.778217	0.992188	1.23047	1.2648	1.44635	1.58827	1.84387	2.16917	2.5538	3.15712	3.92197	5.04942	6.71705	12.2669	56.6614
0.0807196	0.246094	0.476598	0.55465	0.778217	0.992188	1.23047	1.2648	1.44635	1.58827	1.86004	2.17051	2.56388	3.15714	3.92197	5.06738	6.72156	12.2884	57.0014
0.0816909	0.246094	0.478892	0.55465	0.778217	0.992188	1.23047	1.2648	1.44635	1.58827	1.87419	2.17986	2.56929	3.16598	3.92197	5.06738	6.7219	12.2977	57.1367
0.0819975	0.246094	0.482215	0.55465	0.778217	0.994417	1.23047	1.2648	1.44635	1.58827	1.87419	2.18148	2.56929	3.17655	3.92197	5.06738	6.7575	12.2977	57.3921
0.0824443	0.246094	0.486568	0.55465	0.778217	0.995209	1.23047	1.2648	1.44635	1.58827	1.87419	2.18695	2.56929	3.17655	3.92214	5.06738	6.7575	12.302	57.5428
0.0829975	0.246094	0.491225	0.55465	0.778217	1.00023	1.23047	1.2648	1.44635	1.58827	1.87419	2.19177	2.56929	3.18238	3.92706	5.06738	6.77071	12.3268	58.0291
0.0831689	0.246094	0.492075	0.55465	0.778217	1.00142	1.23047	1.2648	1.44635	1.58827	1.87652	2.20113	2.56929	3.18313	3.9375	5.06738	6.7749	12.4515	58.0849
0.0833513	0.246094	0.492188	0.55465	0.778217	1.00219	1.23047	1.2648	1.44635	1.58827	1.8869	2.20113	2.56929	3.19288	3.9375	5.07014	6.80495	12.4543	58.8926
0.0836777	0.246094	0.492188	0.55465	0.778217	1.00225	1.23047	1.2648	1.44635	1.58827	1.88907	2.20113	2.56929	3.19922	3.9375	5.07335	6.80662	12.4568	59.3351
0.0843116	0.246094	0.492188	0.55465	0.778217	1.00347	1.23047	1.27411	1.44635	1.58827	1.88907	2.20113	2.56929	3.19922	3.9375	5.07335	6.82439	12.4839	59.38
0.0848011	0.246094	0.492188	0.55465	0.778217	1.01244	1.23047	1.27981	1.44635	1.58827	1.89147	2.20113	2.57012	3.19922	3.9375	5.07335	6.84268	12.5024	59.78
0.0854892	0.246094	0.492188	0.55465	0.778217	1.01316	1.23047	1.28202	1.44635	1.6211	1.89335	2.20748	2.58377	3.19922	3.9375	5.07335	6.85538	12.5135	60.5656
0.0862221	0.246094	0.492188	0.55465	0.778217	1.01467	1.23047	1.28206	1.44809	1.62223	1.89557	2.21484	2.58969	3.19922	3.9375	5.07335	6.85538	12.5162	61.4096
0.0865405	0.246094	0.492188	0.55465	0.778217	1.01467	1.23047	1.28561	1.45735	1.62691	1.92205	2.21484	2.58969	3.19922	3.9375	5.07335	6.88269	12.5725	64.8759
0.0866441	0.246094	0.492188	0.55465	0.778217	1.01467	1.23047	1.28684	1.46171	1.63053	1.92205	2.21484	2.58969	3.19922	3.9375	5.07335	6.89195	12.5845	66.287
0.0866484	0.246094	0.492188	0.55465	0.778217	1.01467	1.23047	1.28783	1.47475	1.63198	1.92205	2.21484	2.58969	3.19922	3.94518	5.07335	6.89407	12.648	66.7295
0.0866924	0.246094	0.492188	0.55465	0.778217	1.01467	1.23047	1.29101	1.47601	1.63913	1.92205	2.21484	2.58969	3.19922	3.96814	5.07335	6.93443	12.6989	67.1764
0.0873765	0.246094	0.492188	0.55465	0.778217	1.01467	1.23047	1.29372	1.47643	1.64372	1.92205	2.21484	2.58969	3.19922	3.97577	5.07335	6.94752	12.7062	67.7978
0.0877705	0.246094	0.492188	0.55465	0.778217	1.01467	1.23047	1.29624	1.47656	1.65085	1.92205	2.21484	2.5929	3.19922	3.97582	5.07335	6.94974	12.7138	68.1
0.0889262	0.246094	0.492188	0.55465	0.778217	1.01467	1.23047	1.30057	1.47656	1.65085	1.92205	2.21484	2.59378	3.19922	3.97657	5.07335	6.96058	12.7591	70.1026
0.0891136	0.246094	0.492188	0.55465	0.778217	1.01467	1.23047	1.30087	1.47656	1.65085	1.92205	2.21484	2.59838	3.19922	3.9897	5.0889	6.96301	12.7637	72.3105
0.0900733	0.246094	0.492188	0.55465	0.778217	1.01467	1.23047	1.30534	1.47656	1.65085	1.92205	2.21793	2.61442	3.20858	3.99964	5.09803	6.96493	12.7969	72.4177
0.0905592	0.246094	0.492188	0.55465	0.778217	1.01467	1.23047	1.30535	1.47656	1.65085	1.92205	2.2186	2.61601	3.20867	3.99964	5.09898	6.96493	12.7969	72.4724
0.0912999	0.246094	0.492188	0.55465	0.778217	1.01467	1.23047	1.3147	1.47656	1.65085	1.92205	2.2186	2.61601	3.20867	3.99964	5.11362	6.96493	12.7992	72.8442
0.0918423	0.246094	0.492188	0.555409	0.778217	1.01467	1.23047	1.31895	1.47656	1.65085	1.92205	2.2186	2.61601	3.20867	3.99964	5.11362	6.97471	12.8147	82.4506
0.0929346	0.246094	0.492188	0.556921	0.778217	1.01467	1.23047	1.31895	1.47656	1.65085	1.92205	2.22107	2.61601	3.21279	4.00612	5.11362	6.98947	12.8347	83.429
0.0930002	0.246094	0.492188	0.559193	0.778217	1.01467	1.23047	1.32143	1.47656	1.65085	1.92205	2.22645	2.61601	3.21358	4.00612	5.11362	6.98947	12.8465	84.4708
0.0932049	0.246094	0.492188	0.560001	0.778217	1.01467	1.23047	1.32455	1.47656	1.65085	1.92205	2.22847	2.61601	3.22461	4.00612	5.11362	6.98947	12.8465	85.3364
0.0946285	0.246094	0.492188	0.563167	0.778217	1.01467	1.23047	1.32526	1.47656	1.65085	1.92205	2.23242	2.62334	3.22461	4.00732	5.11362	7.01065	12.8913
0.0947222	0.246094	0.492188	0.5648	0.778217	1.01467	1.23047	1.32526	1.47656	1.65085	1.92205	2.23242	2.63283	3.22461	4.00732	5.13859	7.05135	12.9003
0.0951222	0.246094	0.492188	0.566603	0.778217	1.01467	1.23047	1.32526	1.47656	1.65085	1.92205	2.23242	2.63677	3.22461	4.01345	5.13859	7.05327	12.9008
0.0968075	0.246094	0.492188	0.57035	0.778217	1.01467	1.23047	1.32526	1.47656	1.65633	1.93731	2.23242	2.63677	3.22461	4.02461	5.13859	7.0552	12.9029
0.0978954	0.246094	0.492188	0.572336	0.778217	1.01467	1.23047	1.32526	1.47656	1.66065	1.93731	2.23242	2.64556	3.23308	4.03624	5.13951	7.08562	12.9029
0.10019	0.246094	0.492188	0.574959	0.778217	1.01467	1.23047	1.32526	1.47656	1.66395	1.93731	2.23242	2.64743	3.23414	4.03791	5.16054	7.08562	12.913
0.100232	0.246094	0.492188	0.580336	0.778217	1.01467	1.23047	1.32526	1.47656	1.66395	1.93731	2.23402	2.65051	3.23414	4.03791	5.16797	7.08562	12.9146
0.100681	0.246094	0.492188	0.588988	0.778217	1.01467	1.23047	1.32526	1.47656	1.66395	1.93731	2.24033	2.65051	3.23686	4.0432	5.16797	7.0876	12.9146
0.100828	0.246889	0.492188	0.58966	0.778217	1.01467	1.23047	1.32526	1.47656	1.66395	1.93731	2.24616	2.65051	3.23686	4.06827	5.17937	7.09843	12.9413
0.100975	0.247429	0.492188	0.59213	0.778217	1.01467	1.23047	1.32526	1.47656	1.66395	1.93731	2.24616	2.65051	3.24626	4.07358	5.17986	7.10269	12.9685
0.101016	0.248047	0.492188	0.596485	0.778217	1.01467	1.23047	1.32526	1.47656	1.66871	1.93731	2.24616	2.65589	3.25697	4.07358	5.1841	7.1748	13.0244
0.101054	0.248047	0.492188	0.599191	0.778217	1.01467	1.23047	1.32526	1.47656	1.67311	1.93731	2.24616	2.66191	3.26046	4.09089	5.19135	7.1748	13.0354
0.101209	0.248047	0.492188	0.601144	0.778217	1.01467	1.23047	1.32526	1.47656	1.6786	1.93731	2.24616	2.66191	3.27565	4.09089	5.19135	7.1748	13.0824
0.103103	0.248047	0.492188	0.601246	0.778217	1.01467	1.23047	1.32526	1.47656	1.70943	1.93731	2.24616	2.66191	3.2779	4.09582	5.20403	7.19852	13.1055
0.103425	0.248047	0.492188	0.603366	0.778217	1.01467	1.23047	1.32526	1.47656	1.72069	1.93731	2.24616	2.66191	3.2833	4.09582	5.21463	7.20429	13.1348
0.10364	0.248047	0.492188	0.603739	0.778217	1.01467	1.23047	1.32526	1.47656	1.72266	1.93731	2.24616	2.67155	3.2833	4.10591	5.21463	7.20941	13.1348
0.103664	0.248047	0.492188	0.613514	0.778217	1.01467	1.23047	1.32526	1.47656	1.72266	1.93731	2.2515	2.67155	3.2833	4.10591	5.21463	7.23175	13.1348
0.10441	0.248047	0.492188	0.616871	0.778217	1.01467	1.23047	1.32526	1.47656	1.72266	1.93731	2.26887	2.67155	3.28971	4.12528	5.21463	7.23783	13.142
0.104696	0.248047	0.492188	0.618189	0.778217	1.01467	1.23047	1.32526	1.47656	1.72266	1.93731	2.26887	2.67155	3.30085	4.12528	5.21489	7.24394	13.1488
0.105772	0.248047	0.492188	0.619388	0.778217	1.01467	1.23047	1.32526	1.47656	1.72266	1.93731	2.26887	2.67155	3.30169	4.12528	5.21812	7.28355	13.1558
0.105779	0.248047	0.492188	0.623124	0.778217	1.01467	1.23047	1.32526	1.47656	1.72266	1.93731	2.26887	2.67155	3.30595	4.12528	5.22044	7.28787	13.1839
0.107265	0.248047	0.492188	0.624742	0.778217	1.01467	1.23047	1.32526	1.48742	1.72266	1.93731	2.26887	2.68304	3.31085	4.1417	5.22044	7.29528	13.2182
0.107981	0.248047	0.492188	0.627061	0.778217	1.01467	1.23047	1.32526	1.48828	1.72266	1.93731	2.26887	2.68304	3.31085	4.15802	5.22044	7.30447	13.2191
0.108282	0.248047	0.492188	0.629658	0.782215	1.01467	1.23047	1.32526	1.48828	1.72266	1.93731	2.26887	2.68304	3.31085	4.15802	5.22044	7.36342	13.2297
0.108896	0.248047	0.492188	0.64108	0.784393	1.01467	1.23047	1.32526	1.48828	1.72266	1.93731	2.27212	2.70564	3.31118	4.15802	5.22044	7.36662	13.3084
0.109014	0.248047	0.492188	0.641947	0.784393	1.01467	1.23047	1.32526	1.48828	1.72266	1.93731	2.27288	2.70703	3.32278	4.15802	5.23255	7.3746	13.3096
0.109328	0.248047	0.492188	0.648783	0.784393	1.01467	1.23047	1.32526	1.48828	1.72266	1.93962	2.28688	2.70703	3.32739	4.17682	5.23255	7.38281	13.3445
0.109575	0.248047	0.492188	0.653924	0.784393	1.01467	1.23047	1.32526	1.48828	1.72266	1.94224	2.28688	2.70703	3.3279	4.18359	5.23909	7.38691	13.4152
0.109941	0.248047	0.492188	0.656633	0.784393	1.01467	1.23047	1.32526	1.48828	1.72266	1.94267	2.28688	2.70703	3.3279	4.18359	5.25602	7.38691	13.4244
0.11219	0.248047	0.492188	0.661312	0.784393	1.01467	1.23047	1.32526	1.48828	1.72266	1.95728	2.30675	2.70703	3.33713	4.18359	5.26088	7.39212	13.4814
0.112858	0.248047	0.492188	0.664117	0.784393	1.01467	1.23047	1.32526	1.48828	1.72266	1.96875	2.32164	2.70703	3.33713	4.18359	5.26187	7.4088	13.5066
0.112984	0.248047	0.492188	0.665078	0.784393	1.01467	1.23047	1.32526	1.48828	1.72266	1.96875	2.32164	2.70703	3.33713	4.18359	5.26187	7.41963	13.5339
0.113096	0.248047	0.492188	0.667145	0.784393	1.01467	1.23047	1.32526	1.48828	1.72986	1.96875	2.32164	2.70703	3.33713	4.18359	5.26702	7.44001	13.5339
0.113274	0.248047	0.492188	0.675783	0.784393	1.01467	1.23047	1.32526	1.49131	1.73633	1.96875	2.32164	2.70703	3.33713	4.18359	5.28017	7.44001	13.5441
0.113485	0.248047	0.492188	0.675949	0.784393	1.01467	1.23047	1.32526	1.49443	1.73633	1.96875	2.32164	2.70703	3.34356	4.19083	5.28386	7.44767	13.6966
0.113704	0.248047	0.492188	0.681049	0.784393	1.01467	1.23047	1.32526	1.49693	1.73633	1.96875	2.32164	2.70703	3.34724	4.19083	5.28386	7.44815	13.6988
0.114467	0.248047	0.492188	0.682372	0.784393	1.01467	1.23047	1.32526	1.49693	1.73633	1.96875	2.32164	2.70703	3.34724	4.20525	5.30102	7.45661	13.7108
0.114627	0.248047	0.492188	0.688712	0.784393	1.01467	1.23047	1.32526	1.49693	1.73633	1.96875	2.32164	2.70703	3.35071	4.21029	5.30102	7.46205	13.7325
0.115007	0.248047	0.492188	0.693425	0.784393	1.01467	1.23047	1.32526	1.49693	1.73633	1.96875	2.32164	2.70703	3.35205	4.21245	5.30102	7.48465	13.7361
0.116861	0.248047	0.492188	0.696058	0.784393	1.01467	1.23047	1.32526	1.49693	1.73633	1.96875	2.32164	2.70703	3.36494	4.21441	5.30843	7.48465	13.7928
0.117332	0.248047	0.492188	0.696058	0.784393	1.01467	1.23047	1.32526	1.49693	1.73633	1.96875	2.32164	2.70703	3.3738	4.2168	5.30843	7.50211	13.8359
0.117858	0.248047	0.492188	0.696058	0.784393	1.01467	1.23047	1.32526	1.49693	1.73633	1.96875	2.32164	2.70703	3.3738	4.2168	5.31243	7.51192	13.8418
0.117895	0.248047	0.492188	0.696058	0.784393	1.01467	1.23047	1.32526	1.49693	1.73633	1.96875	2.32164	2.70703	3.3738	4.2168	5.31243	7.51628	13.9105
0.118179	0.248047	0.492188	0.696058	0.784393	1.01467	1.23047	1.32526	1.50179	1.73633	1.96875	2.32164	2.70703	3.3832	4.23396	5.31243	7.54405	14.0273
0.11861	0.248047	0.492188	0.696058	0.784393	1.01467	1.23047	1.32526	1.50476	1.73633	1.96875	2.32164	2.71447	3.40829	4.23863	5.31243	7.58113	14.0295
0.118771	0.248047	0.492188	0.696058	0.784393	1.01467	1.23128	1.32526	1.50881	1.73633	1.96875	2.32582	2.71702	3.41448	4.23863	5.32382	7.60902	14.0776
0.119011	0.248047	0.492188	0.696058	0.784393	1.01728	1.23183	1.32526	1.50881	1.74015	1.96875	2.33465	2.71819	3.41455	4.23863	5.32382	7.60902	14.0797
0.119512	0.248047	0.492188	0.696058	0.784393	1.01864	1.23184	1.32526	1.50881	1.74015	1.98077	2.33465	2.71819	3.41884	4.23863	5.32579	7.63287	14.0941
0.120725	0.248047	0.492188	0.696058	0.784393	1.01993	1.23203	1.32526	1.50881	1.74015	1.98407	2.33831	2.71819	3.42769	4.24824	5.33265	7.6408	14.2819
0.121501	0.248047	0.492188	0.696058	0.784393	1.02198	1.23274	1.32526	1.50881	1.74015	1.98407	2.34007	2.71819	3.42769	4.24824	5.34309	7.64477	14.3073
0.121511	0.248047	0.492188	0.696058	0.788557	1.02228	1.2331	1.32526	1.50881	1.74015	1.98407	2.34007	2.71819	3.42769	4.24824	5.35028	7.69345	14.4209
0.123195	0.248047	0.492188	0.696058	0.794733	1.02272	1.23599	1.32526	1.50881	1.74015	1.98407	2.34007	2.71819	3.42769	4.27089	5.3546	7.70544	14.4443
0.123963	0.248047	0.492188	0.696058	0.795531	1.02272	1.23855	1.32526	1.50881	1.74015	1.98407	2.34007	2.71819	3.43851	4.27887	5.36149	7.72538	14.5589
0.124105	0.248047	0.492188	0.696058	0.801085	1.02272	1.24023	1.32526	1.50881	1.74015	1.98407	2.35318	2.72852	3.43868	4.28079	5.36607	7.72538	14.5842
0.124982	0.248047	0.492188	0.696058	0.803305	1.02272	1.24023	1.33119	1.51358	1.74015	1.98407	2.35318	2.72852	3.44531	4.28195	5.37477	7.74923	14.6432
0.126255	0.248047	0.492188	0.696058	0.804205	1.02272	1.24023	1.33577	1.51565	1.74015	1.98407	2.35318	2.72852	3.44531	4.29784	5.38141	7.7621	14.6432
0.126284	0.248047	0.492188	0.696058	0.805215	1.02272	1.24023	1.33577	1.52377	1.74015	1.98407	2.35318	2.72969	3.44531	4.29784	5.39726	7.78883	14.6524
0.12651	0.248047	0.492188	0.696058	0.805829	1.02272	1.24023	1.33577	1.52676	1.74015	1.98407	2.35318	2.73977	3.44531	4.29784	5.39726	7.79103	14.6914
0.126812	0.248047	0.492188	0.696058	0.805913	1.02272	1.24023	1.33577	1.53414	1.74015	1.98407	2.35386	2.73977	3.44531	4.30488	5.39726	7.81711	14.7249
0.127216	0.248047	0.492188	0.696058	0.805949	1.02272	1.24023	1.33577	1.53675	1.74015	1.98438	2.36038	2.74478	3.44531	4.33195	5.39726	7.82098	14.743
0.12757	0.248047	0.492188	0.696058	0.808797	1.02272	1.24023	1.33577	1.53798	1.74015	1.98438	2.36909	2.75141	3.44531	4.33195	5.39726	7.84447	14.88
0.127575	0.248047	0.492188	0.696058	0.808816	1.02272	1.24023	1.33577	1.5426	1.74015	1.98438	2.38164	2.75141	3.44531	4.33453	5.39776	7.87884	14.9693
0.127789	0.248047	0.492188	0.696058	0.813923	1.02272	1.24023	1.33577	1.55643	1.74015	1.98438	2.38969	2.75141	3.44531	4.33519	5.4027	7.87884	14.9858
0.128939	0.248047	0.492188	0.696058	0.814208	1.02272	1.24023	1.33577	1.55643	1.74015	1.98438	2.41484	2.75141	3.44531	4.35015	5.40286	7.87915	15.0299
0.130881	0.248047	0.492188	0.696058	0.815444	1.02272	1.24023	1.33577	1.55643	1.74015	1.98438	2.42281	2.75141	3.44531	4.35384	5.41406	7.8811	15.0299
0.131741	0.248047	0.492188	0.696058	0.817024	1.02272	1.24023	1.33577	1.55643	1.74015	1.98438	2.42374	2.75141	3.44598	4.35384	5.41406	7.88305	15.0299
0.132253	0.248047	0.492188	0.696058	0.81811	1.02272	1.24023	1.33577	1.55643	1.74015	1.98438	2.42374	2.75141	3.44598	4.35384	5.41743	7.88305	15.0842
0.132526	0.248047	0.492188	0.696058	0.820854	1.02272	1.24023	1.33577	1.55643	1.74015	1.98438	2.42374	2.75141	3.44598	4.36079	5.41743	7.8883	15.1309
0.132659	0.248047	0.492188	0.696058	0.823303	1.02272	1.24023	1.35341	1.55643	1.74015	1.98438	2.43318	2.75141	3.45195	4.36079	5.41965	7.9045	15.1329
0.133783	0.248047	0.492188	0.696058	0.826336	1.02272	1.24023	1.35929	1.55643	1.74015	1.98438	2.4362	2.75141	3.45409	4.36079	5.43639	7.93697	15.1329
0.134095	0.248047	0.492188	0.696058	0.828186	1.02272	1.24023	1.36236	1.55643	1.74015	1.98438	2.43792	2.75141	3.45409	4.36079	5.44009	7.94137	15.1634
0.134503	0.248047	0.492188	0.696058	0.831048	1.02272	1.24023	1.363	1.55643	1.74015	1.98438	2.43933	2.75141	3.45409	4.3646	5.44009	7.94391	15.236
0.135582	0.248047	0.492188	0.696058	0.831459	1.02272	1.24023	1.36377	1.55643	1.74015	1.98438	2.44298	2.75141	3.45409	4.38157	5.44574	7.95153	15.264
0.136752	0.248047	0.492188	0.696058	0.840562	1.02272	1.24023	1.37137	1.55698	1.74015	1.98438	2.44298	2.75141	3.45489	4.3884	5.44752	7.95387	15.3646
0.137146	0.248047	0.492188	0.696058	0.844107	1.02362	1.24023	1.37813	1.56169	1.74015	1.98438	2.44298	2.75141	3.45489	4.3954	5.46267	7.99927	15.3646
0.137179	0.248047	0.492188	0.696058	0.844779	1.02717	1.24023	1.38805	1.56879	1.74015	1.98438	2.44298	2.75141	3.45735	4.3954	5.46267	7.99927	15.3809
0.1377	0.248047	0.492188	0.696058	0.845751	1.02964	1.24023	1.3903	1.56879	1.74015	1.98539	2.44298	2.75141	3.48029	4.3954	5.46417	8.00696	15.3809
0.137805	0.248047	0.492188	0.696058	0.846119	1.04019	1.24023	1.39212	1.56879	1.74015	1.98562	2.44298	2.75141	3.48029	4.3954	5.47953	8.00696	15.406
0.138578	0.248047	0.492188	0.696058	0.846396	1.04409	1.24023	1.39212	1.56879	1.74015	1.9866	2.44298	2.75141	3.48029	4.40226	5.50282	8.01178	15.4177
0.138733	0.248047	0.492188	0.696058	0.848529	1.04409	1.24023	1.39212	1.56879	1.74015	1.99021	2.44298	2.75141	3.48029	4.40226	5.50282	8.02125	15.4961
0.139269	0.248047	0.492188	0.696058	0.84862	1.04409	1.24023	1.39212	1.56879	1.74015	1.99045	2.44459	2.75141	3.48029	4.41635	5.50282	8.03206	15.5215
0.13951	0.248047	0.492188	0.696058	0.84915	1.04409	1.24023	1.39212	1.56879	1.74015	1.99982	2.44565	2.77325	3.48029	4.43652	5.50282	8.04867	15.5215
0.14016	0.248047	0.492188	0.696058	0.858305	1.04409	1.24023	1.39212	1.56879	1.74015	1.99982	2.45533	2.77325	3.48029	4.43652	5.50282	8.06121	15.5741
0.141114	0.248047	0.492188	0.696058	0.860486	1.04409	1.24023	1.39212	1.56879	1.74015	1.99982	2.45559	2.77325	3.48029	4.43652	5.50753	8.07963	15.5777
0.143411	0.248047	0.492188	0.701583	0.862808	1.04409	1.24023	1.39212	1.56879	1.74015	1.99982	2.45792	2.77325	3.48029	4.43652	5.50753	8.07963	15.5777
0.144789	0.248047	0.492188	0.701583	0.863309	1.04409	1.24023	1.39212	1.57051	1.74015	1.99982	2.46094	2.77325	3.48029	4.43652	5.51412	8.07963	15.627
0.145144	0.248047	0.492188	0.701583	0.864782	1.04409	1.24023	1.39212	1.57577	1.74015	1.99982	2.46094	2.77325	3.48029	4.43652	5.55213	8.07963	15.6289
0.145643	0.248047	0.492188	0.701583	0.869999	1.04409	1.24023	1.39776	1.57577	1.74015	1.99982	2.46094	2.77325	3.48029	4.43652	5.56702	8.11003	15.798
0.145674	0.248047	0.492188	0.701583	0.870182	1.04409	1.24023	1.40317	1.57577	1.74015	1.99982	2.46094	2.77325	3.48029	4.4372	5.57416	8.12793	16.0264
0.145799	0.248047	0.492188	0.701583	0.874028	1.04409	1.24023	1.40317	1.57577	1.75383	1.99982	2.46094	2.77325	3.48029	4.4372	5.57416	8.13599	16.0433
0.145833	0.248047	0.492188	0.701583	0.878346	1.04409	1.24023	1.40317	1.57577	1.75396	2.01302	2.46094	2.77325	3.48029	4.4372	5.57416	8.1592	16.1224
0.146682	0.248047	0.492188	0.701583	0.882121	1.04409	1.24023	1.40317	1.57577	1.75396	2.02759	2.46094	2.78423	3.48029	4.43934	5.57416	8.21181	16.123
0.147243	0.248047	0.492188	0.701583	0.882952	1.04409	1.24023	1.40317	1.57577	1.75396	2.02934	2.46094	2.78423	3.48029	4.45695	5.57462	8.21181	16.156
0.148287	0.248047	0.492188	0.701583	0.883234	1.04409	1.24023	1.40317	1.57577	1.75396	2.02934	2.46094	2.79156	3.48029	4.45695	5.57933	8.21181	16.2746
0.150781	0.248047	0.492188	0.705013	0.887304	1.04409	1.24023	1.40317	1.57577	1.75396	2.02934	2.46094	2.79846	3.48029	4.45695	5.57933	8.24493	16.2842
0.150858	0.248047	0.492188	0.705917	0.887304	1.04409	1.24023	1.40317	1.57577	1.75396	2.02934	2.46094	2.8059	3.49765	4.47173	5.57933	8.24546	16.2946
0.151254	0.248047	0.492188	0.709177	0.887304	1.04409	1.24023	1.40317	1.57577	1.75396	2.02934	2.46094	2.8059	3.49843	4.47546	5.57933	8.25665	16.3725
0.151257	0.248047	0.492188	0.712458	0.887304	1.04409	1.24023	1.40317	1.57577	1.75396	2.02934	2.46094	2.8059	3.50791	4.48682	5.59619	8.29011	16.3955
0.153387	0.248047	0.492188	0.714924	0.887304	1.04414	1.24023	1.40317	1.57577	1.75396	2.04545	2.46094	2.8059	3.50944	4.51768	5.6118	8.31975	16.3999
0.154308	0.248047	0.492188	0.72249	0.887304	1.04514	1.24023	1.40317	1.57577	1.75396	2.04545	2.46094	2.8059	3.51425	4.51768	5.6118	8.31975	16.5226
0.154492	0.248047	0.492188	0.725177	0.887304	1.04681	1.24023	1.40317	1.57577	1.75396	2.04545	2.46094	2.8061	3.51547	4.51768	5.61266	8.31975	16.5762
0.154592	0.248047	0.492188	0.727587	0.887304	1.05237	1.24023	1.40317	1.57577	1.75396	2.04545	2.46094	2.80633	3.51563	4.52643	5.61266	8.4105	16.8044
0.156471	0.248047	0.492188	0.727657	0.887304	1.05237	1.24023	1.41517	1.57577	1.75396	2.05203	2.46094	2.80633	3.5226	4.52643	5.61719	8.4105	16.8179
0.156722	0.248047	0.492188	0.728533	0.887304	1.05237	1.24023	1.41916	1.57577	1.75396	2.05451	2.46094	2.81409	3.52383	4.53774	5.62361	8.4177	16.8339
0.156914	0.248047	0.492188	0.730194	0.887304	1.05237	1.24023	1.42186	1.57577	1.75396	2.06132	2.46094	2.82614	3.52754	4.53774	5.66016	8.42489	16.9319
0.15833	0.248047	0.492188	0.730328	0.887304	1.05446	1.24023	1.42337	1.57577	1.75396	2.06138	2.46094	2.82817	3.53569	4.53774	5.66016	8.45718	16.9519
0.158631	0.248047	0.492188	0.730506	0.887304	1.05695	1.24023	1.42512	1.57577	1.75396	2.08817	2.46094	2.82817	3.54337	4.53774	5.66178	8.47725	16.9965
0.159209	0.248047	0.492188	0.731021	0.887304	1.06746	1.24023	1.42983	1.57577	1.75396	2.08817	2.46094	2.82817	3.55149	4.53774	5.6655	8.50004	17.0344
0.159836	0.248047	0.492188	0.731091	0.887304	1.06798	1.24023	1.43116	1.57577	1.75396	2.09949	2.46094	2.82817	3.55209	4.55354	5.6655	8.508	17.0535
0.159992	0.248047	0.492188	0.734731	0.887304	1.07202	1.24023	1.43496	1.57577	1.75396	2.10263	2.46094	2.82817	3.55592	4.55354	5.68152	8.53512	17.1102
0.160467	0.248047	0.492188	0.736214	0.887304	1.07481	1.24023	1.43496	1.57577	1.75396	2.10263	2.46094	2.82817	3.56176	4.55354	5.72399	8.54268	17.1243
0.160717	0.248047	0.492188	0.738281	0.887304	1.08666	1.24023	1.43496	1.57577	1.75396	2.10263	2.47321	2.83647	3.58318	4.55354	5.72399	8.59569	17.2002
0.161309	0.248047	0.492188	0.738281	0.887304	1.08897	1.24023	1.43496	1.57577	1.75396	2.10263	2.47321	2.83885	3.58318	4.56029	5.72661	8.6639	17.2299
0.162001	0.248047	0.492188	0.738281	0.887304	1.0903	1.24023	1.43496	1.57577	1.75396	2.10263	2.47321	2.85467	3.58318	4.56029	5.73984	8.69725	17.294
0.162192	0.248047	0.492188	0.738281	0.887304	1.09275	1.24023	1.43496	1.57577	1.75396	2.10362	2.47321	2.86992	3.58318	4.57376	5.74512	8.70073	17.3278
0.163574	0.248047	0.492188	0.738281	0.887304	1.09384	1.24023	1.43496	1.57577	1.75396	2.11698	2.47321	2.87808	3.58318	4.57761	5.74512	8.70073	17.3651
0.167687	0.248047	0.492188	0.738281	0.887304	1.09601	1.24023	1.43496	1.57577	1.75396	2.11698	2.47321	2.88045	3.58318	4.57761	5.74512	8.72853	17.4199
0.167907	0.248047	0.492188	0.738281	0.887304	1.09703	1.24023	1.43496	1.57577	1.75396	2.11698	2.47321	2.88045	3.59964	4.59741	5.74512	8.78386	17.5004
0.168836	0.248047	0.492188	0.738281	0.887304	1.09841	1.24023	1.43496	1.57577	1.75396	2.11698	2.47321	2.88045	3.60152	4.59741	5.76616	8.80828	17.5062
0.169675	0.248047	0.492188	0.738281	0.887304	1.09869	1.24023	1.43496	1.57577	1.76624	2.11698	2.47321	2.88608	3.60231	4.59741	5.76616	8.80828	17.5062
0.170301	0.248047	0.492188	0.738281	0.887304	1.10039	1.24023	1.43496	1.57577	1.7708	2.11698	2.47321	2.88759	3.60338	4.59741	5.76616	8.80828	17.5422
0.170464	0.248047	0.492188	0.738281	0.887304	1.10056	1.24023	1.43496	1.57577	1.77461	2.11698	2.47321	2.8927	3.60565	4.59741	5.79199	8.8217	17.6176
0.17106	0.248047	0.492188	0.738281	0.887304	1.10056	1.24023	1.43496	1.57577	1.77461	2.11698	2.47321	2.90306	3.60792	4.59741	5.80663	8.83542	17.6183
0.171729	0.248047	0.492188	0.738281	0.887304	1.10056	1.24023	1.43496	1.57577	1.77461	2.11698	2.47321	2.91786	3.61162	4.59741	5.80802	8.87304	17.6549
0.171739	0.248047	0.492188	0.738281	0.887304	1.10056	1.24023	1.43496	1.57577	1.77461	2.11698	2.47321	2.93705	3.61162	4.59741	5.81192	8.89008	17.7384
0.172444	0.248047	0.492188	0.738281	0.887304	1.10056	1.24023	1.43496	1.57577	1.77461	2.11698	2.47321	2.94318	3.61162	4.61855	5.8354	8.89171	17.7384
0.172455	0.248047	0.492188	0.738281	0.887304	1.10056	1.24023	1.43496	1.57577	1.77461	2.11698	2.47321	2.94865	3.63742	4.62368	5.83833	8.89349	17.7575
0.173883	0.248047	0.492188	0.738281	0.887304	1.10056	1.24023	1.43496	1.57577	1.77461	2.11698	2.47321	2.95106	3.64069	4.62368	5.84958	8.93826	17.787
0.174498	0.248047	0.492188	0.738281	0.887304	1.10056	1.24059	1.43496	1.57577	1.77461	2.11698	2.47727	2.95139	3.65264	4.62368	5.87025	8.98806	17.8266
0.174747	0.248047	0.492188	0.738281	0.887304	1.10056	1.24444	1.43496	1.57577	1.78869	2.11698	2.48047	2.95312	3.65489	4.62368	5.87712	8.99804	17.8295
0.174976	0.248047	0.492188	0.738281	0.887304	1.10056	1.25308	1.43496	1.58665	1.78869	2.11698	2.48047	2.95312	3.65493	4.62368	5.88033	9.01882	17.8702
0.178103	0.248047	0.492188	0.738281	0.887304	1.10056	1.25398	1.43496	1.58827	1.78869	2.11698	2.48047	2.95312	3.65845	4.6339	5.90625	9.01882	17.8818
0.178412	0.248047	0.492188	0.738281	0.887304	1.10056	1.25439	1.43496	1.58827	1.78869	2.11698	2.48047	2.95312	3.65845	4.6339	5.90625	9.02866	17.9446
0.179339	0.248047	0.492188	0.738281	0.887304	1.10056	1.25484	1.43496	1.58827	1.78869	2.11698	2.48047	2.95312	3.65845	4.6339	5.91137	9.02866	17.9648
0.179963	0.248047	0.492188	0.738281	0.887304	1.10056	1.25484	1.43496	1.58827	1.78869	2.11698	2.48047	2.95312	3.65845	4.63975	5.94712	9.02866	17.971
0.180874	0.248047	0.492188	0.738281	0.887304	1.10056	1.25484	1.43496	1.58827	1.78869	2.11798	2.48047	2.95879	3.65845	4.64329	5.94712	9.02904	17.9776
0.183387	0.248047	0.492188	0.738281	0.887304	1.10056	1.25484	1.43496	1.58827	1.78869	2.11931	2.48047	2.96336	3.65845	4.64329	5.94712	9.09693	18.0707
0.184354	0.248047	0.492188	0.738281	0.887304	1.10056	1.25484	1.43496	1.58827	1.78869	2.11931	2.48047	2.96336	3.65845	4.65024	5.95221	9.10707	18.0819
0.184885	0.248047	0.492188	0.738281	0.887304	1.10056	1.25484	1.43496	1.58827	1.78869	2.11931	2.49284	2.96336	3.65845	4.66038	5.95221	9.10879	18.0819
0.185304	0.248047	0.492188	0.738281	0.887304	1.10056	1.25484	1.43496	1.58827	1.78869	2.11931	2.49284	2.96336	3.65845	4.66038	5.9573	9.10879	18.1276
0.185374	0.248047	0.492188	0.738281	0.887304	1.10056	1.25484	1.43496	1.58827	1.78869	2.11931	2.49284	2.96336	3.65845	4.66284	5.9573	9.13203	18.1526
0.185441	0.248047	0.492188	0.738281	0.887304	1.10056	1.25484	1.43496	1.58827	1.79034	2.11931	2.50967	2.96336	3.66237	4.66449	5.9573	9.13535	18.2342
0.18593	0.248047	0.492188	0.738281	0.887304	1.10056	1.25484	1.43496	1.58827	1.79159	2.11931	2.50967	2.96336	3.66237	4.6693	5.95829	9.15088	18.2445
0.185971	0.248047	0.492188	0.738281	0.887304	1.10056	1.25484	1.43496	1.58827	1.79159	2.1243	2.50967	2.96336	3.66237	4.6693	5.96055	9.15522	18.2475
0.187285	0.248047	0.492188	0.738281	0.887304	1.10056	1.25484	1.43496	1.58827	1.79159	2.13281	2.50967	2.96336	3.66396	4.67578	5.9656	9.22441	18.2856
0.187342	0.248047	0.492188	0.738281	0.887304	1.10056	1.25484	1.43496	1.58827	1.79159	2.13378	2.50967	2.96336	3.68748	4.67578	5.97592	9.23753	18.3034
0.187644	0.248047	0.492188	0.738281	0.894346	1.10056	1.25484	1.43496	1.58827	1.79159	2.13378	2.5158	2.96336	3.68748	4.68014	5.99574	9.25638	18.3102
0.188226	0.248047	0.492188	0.738281	0.894346	1.10056	1.25484	1.43496	1.58827	1.79159	2.13378	2.5181	2.96336	3.68748	4.68225	5.99945	9.31588	18.3253
0.188691	0.248047	0.492188	0.738281	0.894346	1.10056	1.25484	1.43496	1.58827	1.79371	2.13378	2.52959	2.96336	3.68748	4.68225	6.00791	9.33724	18.3789
0.190429	0.248047	0.492188	0.738281	0.894346	1.10056	1.25484	1.43496	1.58827	1.80581	2.13378	2.52959	2.96834	3.69141	4.70161	6.02303	9.36028	18.4157
0.191705	0.248047	0.492188	0.738281	0.894346	1.10056	1.25484	1.43496	1.58827	1.80581	2.13378	2.52959	2.97356	3.69141	4.70161	6.02647	9.37097	18.4374
0.193307	0.248047	0.492188	0.738281	0.894346	1.10056	1.25484	1.43496	1.58828	1.80581	2.13378	2.53369	2.97656	3.69141	4.70636	6.03306	9.37097	18.5256
0.193403	0.248047	0.492188	0.738281	0.894346	1.10056	1.25484	1.43496	1.59259	1.80581	2.13378	2.53369	2.9785	3.69141	4.71941	6.03465	9.41932	18.6035
0.193866	0.248047	0.492188	0.738281	0.894346	1.10056	1.25484	1.43496	1.59331	1.80581	2.13378	2.53369	2.98584	3.69141	4.72731	6.05906	9.44534	18.7177
0.19417	0.248047	0.492188	0.738281	0.894346	1.10056	1.25484	1.43496	1.60018	1.80581	2.13378	2.53369	2.98688	3.69141	4.72731	6.07807	9.44534	18.7629
0.194386	0.248047	0.492188	0.738281	0.894346	1.10056	1.25484	1.43496	1.61743	1.80833	2.13378	2.53369	2.98688	3.69141	4.72731	6.07807	9.46742	18.7758
0.195101	0.248047	0.492188	0.738281	0.894346	1.10056	1.25484	1.43496	1.61758	1.81562	2.13801	2.53369	2.98688	3.69141	4.72904	6.07807	9.47061	18.7823
0.195427	0.248047	0.492188	0.738281	0.894346	1.10056	1.25484	1.43496	1.63848	1.81843	2.14465	2.53369	2.98688	3.69141	4.73371	6.07807	9.47786	18.7823
0.19561	0.248047	0.492188	0.738281	0.894346	1.10056	1.25484	1.43496	1.65014	1.82257	2.14697	2.53369	2.98688	3.69141	4.73371	6.07807	9.49407	18.7968
0.195676	0.248047	0.492188	0.738281	0.894346	1.10056	1.25484	1.43496	1.65085	1.83636	2.15087	2.53369	2.98911	3.69556	4.73371	6.08802	9.54578	18.8209
0.19574	0.248047	0.492188	0.738281	0.894346	1.10056	1.25484	1.43496	1.65085	1.84115	2.18314	2.53369	2.99256	3.6996	4.73371	6.09903	9.57152	18.8386
0.196165	0.248047	0.492188	0.738281	0.894346	1.10056	1.25484	1.43496	1.65085	1.84629	2.18632	2.53369	2.99386	3.6996	4.73893	6.10115	9.57861	18.9849
0.196302	0.248047	0.492188	0.738281	0.894346	1.10056	1.25484	1.44479	1.65085	1.85904	2.18659	2.53369	2.99386	3.6996	4.74675	6.10115	9.59766	19.102
0.196714	0.248286	0.492188	0.738281	0.894346	1.10056	1.25484	1.44494	1.65085	1.87419	2.18939	2.53369	2.99386	3.6996	4.75286	6.15234	9.60258	19.1416
0.196729	0.251733	0.492188	0.738281	0.894346	1.10056	1.25484	1.44635	1.65085	1.87419	2.19619	2.53369	2.99711	3.6996	4.75286	6.15234	9.61689	19.1701
0.197647	0.252079	0.492188	0.738281	0.894346	1.10175	1.25484	1.44635	1.65085	1.87419	2.19625	2.54003	2.99716	3.6996	4.75286	6.15234	9.61745	19.2205
0.197982	0.252943	0.492188	0.738281	0.894346	1.10633	1.25484	1.44635	1.65085	1.87419	2.19695	2.54244	2.99833	3.6996	4.7583	6.172	9.62601	19.2347
0.198206	0.253292	0.492188	0.738281	0.894346	1.1088	1.25484	1.44635	1.65085	1.87419	2.20113	2.5538	2.99838	3.6996	4.76482	6.172	9.64768	19.2536
0.198754	0.254986	0.492188	0.738281	0.894346	1.1093	1.25484	1.44635	1.65085	1.87419	2.20113	2.5538	3.00396	3.6996	4.76482	6.172	9.66995	19.2913
0.199397	0.255335	0.492188	0.738281	0.894595	1.1093	1.25484	1.44635	1.65085	1.87419	2.20113	2.5538	3.00396	3.6996	4.76887	6.172	9.6933	19.296
0.200063	0.255446	0.492188	0.738281	0.897317	1.1093	1.25484	1.44635	1.65085	1.87419	2.21484	2.5538	3.00396	3.71129	4.77024	6.172	9.72774	19.296
0.200501	0.255814	0.492188	0.738281	0.909733	1.1093	1.25484	1.44635	1.65085	1.87726	2.21484	2.5538	3.00396	3.71252	4.77128	6.172	9.7467	19.3023
0.200807	0.256079	0.492188	0.738281	0.911113	1.1093	1.25484	1.44635	1.65085	1.88772	2.21484	2.5538	3.00396	3.72407	4.77128	6.172	9.75301	19.3227
0.201161	0.256768	0.49391	0.738281	0.911667	1.1093	1.25484	1.44635	1.66395	1.88907	2.21484	2.5538	3.00396	3.72407	4.77573	6.19648	9.7845	19.404
0.201428	0.257353	0.496015	0.738281	0.916963	1.1093	1.25484	1.44635	1.66395	1.88907	2.21484	2.5538	3.00396	3.72407	4.77828	6.19648	9.79388	19.443
0.201718	0.259173	0.496094	0.738281	0.91708	1.1093	1.25484	1.44635	1.66395	1.88907	2.21484	2.5538	3.00831	3.72407	4.79058	6.20117	9.7951	19.506
0.201748	0.260427	0.496094	0.738281	0.919525	1.1093	1.25484	1.44635	1.67144	1.88907	2.21484	2.55398	3.01376	3.72407	4.81512	6.20613	9.80059	19.5176
0.201877	0.260897	0.496094	0.738281	0.921608	1.1093	1.25484	1.44635	1.67194	1.88907	2.21484	2.55847	3.01762	3.72896	4.8162	6.21604	9.8118	19.5594
0.202006	0.260931	0.496094	0.738281	0.922702	1.1093	1.25484	1.44635	1.67365	1.88907	2.21484	2.56929	3.01992	3.75646	4.8162	6.22098	9.81433	19.6098
0.202295	0.261273	0.496094	0.738281	0.926634	1.1093	1.25484	1.44635	1.67879	1.89585	2.21484	2.56929	3.02407	3.75905	4.82995	6.22098	9.81772	19.6166
0.203338	0.265229	0.496094	0.738281	0.929747	1.1093	1.25484	1.44635	1.682	1.92205	2.21484	2.56929	3.0278	3.76451	4.83498	6.22098	9.82842	19.6274
0.203541	0.270141	0.496094	0.738281	0.930041	1.1093	1.25484	1.44635	1.68574	1.92205	2.21484	2.56929	3.0278	3.76451	4.83498	6.22181	9.84375	19.6875
0.204727	0.271486	0.496094	0.738281	0.930365	1.1093	1.25484	1.44635	1.68843	1.92205	2.21484	2.56929	3.0278	3.76451	4.83498	6.2306	9.84716	19.6937
0.205443	0.273613	0.496094	0.738281	0.933997	1.1093	1.25484	1.44635	1.68947	1.92205	2.2186	2.56929	3.0278	3.77814	4.83498	6.23388	9.84718	19.752
0.205599	0.275966	0.496094	0.738281	0.934281	1.1093	1.25484	1.44635	1.68959	1.92205	2.2186	2.56929	3.0482	3.77814	4.83564	6.25304	9.85605	19.8178
0.205994	0.277083	0.496094	0.738281	0.936759	1.1093	1.25484	1.44838	1.69631	1.92205	2.2186	2.57098	3.05438	3.77814	4.84748	6.27418	9.8714	19.8499
0.206181	0.278525	0.496094	0.738281	0.938682	1.1093	1.25484	1.4536	1.70167	1.92205	2.2186	2.58049	3.05561	3.77814	4.84748	6.27418	9.87526	19.8651
0.206251	0.280217	0.496094	0.738281	0.940536	1.1093	1.25484	1.45724	1.71659	1.92205	2.2186	2.58969	3.06385	3.77866	4.84748	6.27418	9.89285	19.9138
0.20681	0.284945	0.496094	0.738281	0.95079	1.1093	1.25484	1.45803	1.72266	1.92205	2.2186	2.58969	3.08355	3.78627	4.84748	6.28005	9.90325	19.9715
0.206952	0.285503	0.496094	0.738281	0.951398	1.1093	1.25484	1.45831	1.72266	1.92205	2.2186	2.58969	3.10011	3.79439	4.85373	6.28541	9.91703	19.9982
0.209253	0.286371	0.496094	0.738281	0.954965	1.11326	1.25484	1.46147	1.72266	1.92205	2.2186	2.58969	3.10321	3.79934	4.85373	6.28776	9.92036	20.0185
0.209972	0.289757	0.496094	0.738281	0.958117	1.11987	1.25484	1.46328	1.72266	1.92205	2.22107	2.60871	3.10594	3.8204	4.85373	6.30308	9.92036	20.0834
0.210412	0.295073	0.496094	0.738281	0.960974	1.12177	1.25484	1.46639	1.72266	1.92205	2.2246	2.61498	3.10802	3.8204	4.85373	6.30788	9.92036	20.1271
0.211588	0.295495	0.496094	0.738281	0.961569	1.12433	1.25484	1.47656	1.72266	1.92205	2.22725	2.61601	3.10802	3.8204	4.85373	6.32398	9.92807	20.1451
0.211985	0.296168	0.496094	0.738281	0.962011	1.13283	1.25484	1.47656	1.72266	1.92205	2.22847	2.61601	3.10802	3.8204	4.85373	6.32398	9.99496	20.1572
0.212108	0.298098	0.496094	0.738281	0.973661	1.14202	1.25484	1.47656	1.72266	1.92205	2.22847	2.61601	3.10802	3.8204	4.87335	6.32398	9.99909	20.1812
0.212205	0.303359	0.496094	0.738281	0.976992	1.14315	1.25484	1.47656	1.72266	1.92205	2.23242	2.63327	3.10802	3.8204	4.87335	6.32705	10.0089	20.1977
0.212448	0.306925	0.496094	0.738281	0.977276	1.1437	1.25484	1.47656	1.72266	1.92205	2.23242	2.63677	3.11269	3.8298	4.87393	6.32705	10.0447	20.2336
0.21268	0.307467	0.496094	0.738281	0.977549	1.14381	1.25484	1.47656	1.72266	1.9303	2.23242	2.63677	3.11287	3.83266	4.88482	6.34979	10.0451	20.2486
0.213641	0.308271	0.496094	0.738281	0.977914	1.14878	1.25484	1.47656	1.72266	1.9317	2.23242	2.63677	3.12122	3.83443	4.88482	6.35094	10.0676	20.3366
0.21377	0.309461	0.496094	0.738281	0.978285	1.14892	1.25484	1.47656	1.72266	1.93325	2.23242	2.64298	3.13226	3.84154	4.88482	6.35094	10.0727	20.3471
0.214058	0.311676	0.496094	0.738281	0.978956	1.14914	1.25484	1.47656	1.72266	1.93731	2.24075	2.65051	3.13226	3.84411	4.88596	6.36179	10.1044	20.4791
0.215238	0.311878	0.496094	0.738281	0.979092	1.15067	1.25484	1.47656	1.72266	1.93731	2.24616	2.65051	3.13757	3.84411	4.89225	6.36556	10.1214	20.4905
0.215544	0.313271	0.496094	0.738281	0.979775	1.152	1.25484	1.47656	1.72266	1.93731	2.25639	2.65051	3.13757	3.84411	4.89225	6.39844	10.1308	20.5295
0.215872	0.313709	0.496094	0.738281	0.981879	1.15624	1.25484	1.47656	1.72266	1.93731	2.25786	2.65051	3.15154	3.85072	4.89225	6.39844	10.1348	20.5661
0.216811	0.314773	0.496094	0.738281	0.983601	1.16265	1.25484	1.47656	1.72266	1.93731	2.26887	2.65051	3.15712	3.85072	4.90338	6.40317	10.1532	20.6161
0.216952	0.317742	0.496094	0.738281	0.984375	1.16853	1.25484	1.47656	1.72266	1.93731	2.26887	2.65051	3.15712	3.85072	4.90338	6.43967	10.1553	20.6396
0.218636	0.320226	0.496094	0.738281	0.984375	1.17268	1.25484	1.47656	1.72266	1.93731	2.26887	2.65787	3.16242	3.85198	4.90338	6.44089	10.1646	20.6558
0.219047	0.322131	0.496094	0.738281	0.984375	1.17342	1.26069	1.47656	1.72266	1.93731	2.26887	2.66191	3.17655	3.88255	4.90338	6.44089	10.1699	20.7479
0.220233	0.322786	0.496094	0.738281	0.984375	1.17767	1.2648	1.47656	1.72266	1.93731	2.26887	2.66191	3.17655	3.88255	4.92188	6.44089	10.1707	20.7712
0.221115	0.322914	0.496094	0.738281	0.984375	1.17826	1.2648	1.47656	1.72266	1.93731	2.26887	2.66191	3.17655	3.89108	4.92188	6.44089	10.1729	20.8426
0.221793	0.324089	0.496094	0.738281	0.984375	1.18807	1.2648	1.47656	1.72266	1.93731	2.26887	2.66191	3.17655	3.89108	4.92188	6.44089	10.1779	20.8498
0.222502	0.325444	0.496094	0.738281	0.984375	1.19106	1.2648	1.47656	1.72266	1.93731	2.26887	2.6662	3.18409	3.89108	4.92802	6.44089	10.1971	20.8933
0.222695	0.325955	0.496094	0.738281	0.984375	1.19166	1.2648	1.47656	1.72266	1.93731	2.26887	2.66991	3.18659	3.89108	4.93391	6.44922	10.2062	20.9006
0.222863	0.327402	0.496094	0.738281	0.984375	1.193	1.2648	1.47656	1.72266	1.93751	2.26887	2.67155	3.19189	3.89108	4.93588	6.45399	10.214	20.918
0.223331	0.328255	0.496094	0.738281	0.984375	1.19457	1.2648	1.47656	1.72266	1.93804	2.26887	2.67155	3.19432	3.89108	4.93824	6.45967	10.2272	20.957
0.223507	0.330851	0.496094	0.738281	0.984375	1.19813	1.2648	1.47656	1.72266	1.94511	2.26887	2.67155	3.19457	3.89108	4.94642	6.45967	10.2272	20.9758
0.223727	0.331819	0.496094	0.738281	0.984375	1.19882	1.2648	1.47656	1.72266	1.94642	2.26887	2.67155	3.19812	3.89108	4.95254	6.45967	10.2618	21.0153
0.223886	0.334023	0.496094	0.738281	0.984375	1.20199	1.2648	1.47656	1.72794	1.94991	2.27212	2.68304	3.19922	3.89108	4.95254	6.46827	10.3498	21.0234
0.22423	0.334142	0.496094	0.738281	0.984375	1.20283	1.2648	1.47656	1.72923	1.95063	2.27265	2.68304	3.19922	3.89108	4.95276	6.46827	10.3498	21.0263
0.224668	0.336678	0.496094	0.738281	0.984375	1.21159	1.2648	1.47656	1.73633	1.95921	2.27269	2.68304	3.19922	3.89108	4.96094	6.47372	10.3617	21.0263
0.225011	0.337077	0.496094	0.738281	0.984375	1.21187	1.2648	1.47656	1.73633	1.95947	2.28052	2.68304	3.19922	3.89108	4.96713	6.47372	10.3827	21.0622
0.22683	0.337231	0.496094	0.738281	0.984375	1.21239	1.2648	1.47656	1.73633	1.96352	2.28052	2.68304	3.19922	3.89786	4.97042	6.49201	10.4298	21.1412
0.227144	0.337707	0.496094	0.738281	0.984375	1.21459	1.2648	1.47656	1.73633	1.96875	2.28688	2.68304	3.19922	3.90787	4.97694	6.49706	10.4554	21.2018
0.227637	0.337918	0.496094	0.738281	0.984375	1.2154	1.2648	1.47656	1.73633	1.96875	2.28688	2.68304	3.19922	3.91222	4.97694	6.51568	10.468	21.2796
0.228098	0.341957	0.496094	0.738281	0.984375	1.2173	1.2648	1.47656	1.73633	1.96875	2.28688	2.68304	3.19922	3.92197	4.97835	6.51568	10.468	21.2967
0.228352	0.343842	0.496094	0.738281	0.984375	1.22167	1.2648	1.47656	1.73633	1.96875	2.28688	2.69584	3.19922	3.92197	4.98293	6.52462	10.468	21.3365
0.228987	0.344202	0.496094	0.738281	0.984375	1.22194	1.2648	1.47656	1.73633	1.96875	2.28688	2.70359	3.19922	3.92197	4.98302	6.52509	10.4785	21.4045
0.229119	0.34471	0.496094	0.738281	0.984375	1.22888	1.2648	1.47656	1.73633	1.96875	2.29204	2.70659	3.20262	3.92197	4.98302	6.53887	10.5131	21.4878
0.229294	0.345185	0.496094	0.738281	0.984375	1.22931	1.2648	1.47656	1.7378	1.96875	2.32164	2.70703	3.20657	3.92197	4.98302	6.53887	10.5278	21.4892
0.230541	0.345613	0.496094	0.738281	0.984375	1.22971	1.2648	1.47656	1.74015	1.96875	2.32164	2.70703	3.20867	3.94518	4.98302	6.54059	10.5296	21.5244
0.230595	0.345739	0.496094	0.738281	0.984375	1.23047	1.2648	1.47656	1.74015	1.96875	2.32164	2.70703	3.20867	3.94993	4.98302	6.54709	10.5762	21.6395
0.232018	0.347248	0.496094	0.738281	0.984375	1.23047	1.2648	1.47656	1.74015	1.96875	2.32164	2.70703	3.20867	3.9595	4.98302	6.54863	10.582	21.6479
0.232041	0.348029	0.496094	0.738281	0.984375	1.23047	1.2648	1.47656	1.74015	1.96875	2.32164	2.70703	3.20867	3.96814	4.99185	6.55275	10.5849	21.7247
0.232554	0.348029	0.496094	0.738281	0.984375	1.23047	1.2648	1.47656	1.74015	1.96875	2.32164	2.70703	3.20867	3.96814	4.99465	6.55275	10.5855	21.7525
0.232731	0.348029	0.496094	0.738281	0.984375	1.23047	1.27053	1.47656	1.74015	1.96875	2.32164	2.70703	3.20867	3.96814	5.00242	6.55275	10.6078	21.8081
0.232849	0.348029	0.496094	0.738281	0.984375	1.23047	1.27687	1.47656	1.74015	1.96875	2.32164	2.70703	3.20867	3.96814	5.00722	6.55275	10.6113	21.8456
0.233563	0.348029	0.496094	0.738281	0.984375	1.23047	1.27707	1.47656	1.74015	1.96875	2.32164	2.70703	3.20867	3.96814	5.0094	6.56538	10.6689	21.9521
0.23419	0.348029	0.496094	0.738281	0.984375	1.23047	1.27911	1.47656	1.74015	1.96875	2.32164	2.70703	3.20867	3.96814	5.0142	6.62431	10.6689	21.97
0.23427	0.348029	0.496094	0.738281	0.984375	1.23047	1.28005	1.47656	1.74015	1.96875	2.32164	2.70703	3.20867	3.96814	5.01935	6.62628	10.6846	22.0113
0.236311	0.348029	0.496094	0.738281	0.984375	1.23047	1.28423	1.47656	1.74015	1.96875	2.32164	2.70703	3.20867	3.96814	5.01935	6.62628	10.6902	22.1676
0.237686	0.348029	0.496094	0.738281	0.984375	1.23047	1.2938	1.47766	1.74015	1.96875	2.32164	2.70703	3.20867	3.97234	5.01935	6.62628	10.7213	22.3916
0.23774	0.348029	0.496094	0.738281	0.984375	1.23047	1.29535	1.48245	1.74015	1.96875	2.32164	2.70703	3.20867	3.97577	5.01935	6.62628	10.735	22.4162
0.237752	0.348029	0.496094	0.738281	0.984375	1.23047	1.29809	1.48473	1.74015	1.96875	2.32164	2.70703	3.20867	3.97577	5.01935	6.62628	10.7687	22.4301
0.238056	0.348029	0.496094	0.738281	0.984375	1.23047	1.29908	1.48828	1.74015	1.96875	2.32164	2.70703	3.20867	3.97577	5.02257	6.62972	10.7693	22.4486
0.238637	0.348029	0.496094	0.738281	0.984375	1.23047	1.30001	1.48828	1.74015	1.98077	2.32164	2.71819	3.21707	3.97649	5.04942	6.64821	10.7693	22.854
0.238747	0.348029	0.496094	0.738281	0.984375	1.23047	1.30154	1.48828	1.74015	1.98407	2.32164	2.71819	3.22461	3.98155	5.04942	6.64909	10.7861	22.888
0.23929	0.348029	0.496094	0.738281	0.984375	1.23047	1.30331	1.48828	1.74015	1.98407	2.32164	2.71819	3.22461	3.99964	5.04942	6.66274	10.8309	22.9132
0.240137	0.348029	0.496094	0.738281	0.984375	1.23047	1.30359	1.48828	1.74015	1.98407	2.32164	2.71819	3.23414	3.99964	5.05918	6.66274	10.8415	23.0777
0.24079	0.348029	0.496094	0.738281	0.984375	1.23047	1.30583	1.48828	1.74015	1.98407	2.32164	2.71819	3.23414	4.00612	5.06046	6.66274	10.8533	23.1603
0.240872	0.348029	0.49781	0.738281	0.984375	1.23047	1.30717	1.48828	1.74015	1.98407	2.32164	2.71819	3.23686	4.00612	5.06738	6.68542	10.8906	23.2659
0.241027	0.348029	0.500616	0.738281	0.984375	1.23047	1.30813	1.48828	1.74015	1.98407	2.32164	2.71819	3.24417	4.00732	5.06738	6.68813	10.8971	23.584
0.241146	0.348029	0.500746	0.738281	0.984375	1.23047	1.30926	1.48828	1.74015	1.98407	2.32164	2.7283	3.2548	4.00732	5.07335	6.69447	10.8971	23.6685
0.241174	0.348029	0.502198	0.738281	0.984375	1.23047	1.31042	1.48828	1.74015	1.98407	2.32164	2.72987	3.25567	4.00732	5.07335	6.69727	10.9352	23.6791
0.241549	0.348029	0.503118	0.738281	0.984375	1.23047	1.32133	1.48828	1.74015	1.98407	2.32668	2.73227	3.25602	4.00732	5.07335	6.70186	10.9408	23.9433
0.241607	0.348029	0.503381	0.738281	0.984375	1.23047	1.32321	1.48828	1.74015	1.98407	2.32983	2.73258	3.26259	4.01606	5.07335	6.71561	11.0194	23.9433
0.241692	0.348029	0.505223	0.738281	0.984375	1.23047	1.32326	1.48828	1.74015	1.98407	2.34007	2.73977	3.26548	4.036	5.07335	6.71705	11.0712	24.0029
0.242043	0.348029	0.505267	0.738281	0.984375	1.23047	1.32526	1.48828	1.74015	1.98407	2.34007	2.73977	3.26906	4.03624	5.07335	6.71705	11.0852	24.0106
0.242836	0.348029	0.507013	0.743153	0.984375	1.23047	1.32526	1.48851	1.74015	1.98407	2.34007	2.73977	3.2821	4.03624	5.086	6.72156	11.0988	24.0912
0.243651	0.348029	0.510412	0.744141	0.984375	1.23047	1.32526	1.49056	1.74015	1.98407	2.34007	2.74093	3.2833	4.03624	5.0895	6.73678	11.1007	24.1034
0.243654	0.348029	0.511962	0.744141	0.984375	1.23047	1.32526	1.49531	1.74015	1.98407	2.34007	2.75141	3.2833	4.03791	5.0895	6.73888	11.1039	24.1548
0.243871	0.348029	0.516804	0.744141	0.984375	1.23047	1.32526	1.49554	1.74015	1.98438	2.34889	2.75141	3.28857	4.03791	5.09832	6.7575	11.1101	24.2187
0.24427	0.348029	0.522381	0.744141	0.984375	1.23047	1.32526	1.49693	1.74015	1.98438	2.35318	2.75141	3.29191	4.05868	5.1076	6.7575	11.1179	24.3384
0.244367	0.348029	0.522538	0.744141	0.984375	1.23047	1.32526	1.49693	1.74015	1.98438	2.35318	2.75141	3.30169	4.07358	5.11362	6.76527	11.1222	24.5416
0.244736	0.348029	0.52271	0.744141	0.984375	1.23047	1.32526	1.49693	1.74015	1.98438	2.35318	2.75141	3.30423	4.07358	5.11362	6.77036	11.1424	24.7872
0.245158	0.348029	0.531053	0.744141	0.984375	1.23047	1.32526	1.49693	1.74015	1.98438	2.35318	2.75141	3.30936	4.07358	5.11362	6.77036	11.1725	25.0012
0.245208	0.348029	0.531608	0.744141	0.984375	1.23047	1.32526	1.49693	1.74015	1.98438	2.36518	2.75141	3.30936	4.07358	5.1153	6.78377	11.2194	25.0303
0.245426	0.348029	0.534901	0.744141	0.984375	1.23047	1.32526	1.49693	1.74015	1.98438	2.36531	2.75141	3.30936	4.07358	5.13859	6.80662	11.2452	25.0496
0.245816	0.348029	0.535112	0.744141	0.984375	1.23047	1.32526	1.49693	1.74015	1.98438	2.38957	2.75141	3.30936	4.07358	5.13859	6.81113	11.2472	25.295
0.245972	0.348029	0.53916	0.744141	0.984375	1.23047	1.32526	1.49693	1.74015	1.98438	2.38969	2.75141	3.31085	4.09089	5.13859	6.81113	11.25	25.2959
0.246094	0.348029	0.541182	0.744141	0.984375	1.23047	1.32526	1.49693	1.74015	1.98585	2.39211	2.75141	3.31605	4.09582	5.13859	6.82439	11.253	25.3668
0.246094	0.348029	0.541981	0.744141	0.984375	1.23047	1.32526	1.49693	1.74015	1.98691	2.42374	2.75141	3.32043	4.09582	5.15795	6.82439	11.2908	25.5717
0.246094	0.348029	0.542346	0.744141	0.984375	1.23047	1.32526	1.49693	1.74015	1.99982	2.42374	2.75141	3.32578	4.09582	5.16152	6.82439	11.3122	25.627
0.246094	0.348029	0.550282	0.744141	0.984375	1.23047	1.32526	1.49693	1.74015	1.99982	2.42374	2.75141	3.32713	4.09582	5.16152	6.82448	11.3154	25.7025
0.246094	0.348029	0.550282	0.744141	0.984375	1.23047	1.32526	1.49693	1.74015	1.99982	2.42374	2.75141	3.3279	4.10591	5.16797	6.83888	11.331	25.7647
0.246094	0.348029	0.550282	0.744141	0.984375	1.23047	1.32526	1.49693	1.74015	1.99982	2.42374	2.75141	3.3279	4.10591	5.16797	6.86737	11.331	25.7871
0.246094	0.348029	0.550282	0.744141	0.984375	1.23047	1.32526	1.49693	1.74015	1.99982	2.42374	2.75141	3.3279	4.10591	5.17382	6.88269	11.3377	25.8949
0.246094	0.348029	0.550282	0.744141	0.984375	1.23047	1.32526	1.49693	1.74015	1.99982	2.42374	2.75141	3.3279	4.10591	5.17382	6.90818	11.3588	25.9075
0.246094	0.348029	0.550282	0.744141	0.984375	1.23047	1.32526	1.49693	1.74015	1.99982	2.42939	2.75141	3.33713	4.10591	5.17937	6.90818	11.387	25.9159
0.246094	0.348029	0.550282	0.744141	0.984375	1.23047	1.32526	1.49693	1.74015	1.99982	2.43235	2.75141	3.34724	4.12528	5.19135	6.90979	11.4129	26.0069
0.246094	0.348029	0.550282	0.744141	0.984375	1.23047	1.32526	1.49693	1.74015	1.99996	2.4362	2.75141	3.34724	4.12528	5.19135	6.93443	11.4693	26.0406
0.246094	0.348029	0.550282	0.744141	0.984375	1.23047	1.32526	1.49744	1.75137	2.00572	2.44298	2.75141	3.34724	4.12528	5.19135	6.94974	11.4908	26.0627
0.246094	0.348029	0.550282	0.744141	0.984375	1.23047	1.32526	1.50181	1.75396	2.00853	2.44298	2.75141	3.34724	4.12832	5.20642	6.94974	11.5063	26.0836
0.246094	0.348029	0.550282	0.744141	0.984375	1.23047	1.32526	1.50223	1.75396	2.01345	2.44298	2.75141	3.34724	4.15802	5.21463	6.96058	11.5232	26.1671
0.246094	0.348029	0.550282	0.744141	0.984375	1.23047	1.32526	1.50781	1.75396	2.01586	2.44298	2.75141	3.34724	4.15802	5.21463	6.96301	11.5293	26.1671
0.246094	0.348029	0.550282	0.744141	0.984375	1.23047	1.32526	1.50881	1.75396	2.01636	2.44298	2.75141	3.34724	4.17184	5.21463	6.96301	11.5374	26.211
0.246094	0.348029	0.550282	0.744141	0.984375	1.23047	1.32526	1.50881	1.75396	2.02849	2.44334	2.75141	3.36005	4.17635	5.21463	6.98506	11.5506	26.2503
0.246094	0.348029	0.550282	0.744141	0.984375	1.23047	1.32526	1.50881	1.75396	2.02934	2.44459	2.75141	3.36013	4.18359	5.21463	6.98947	11.5611	26.2503
0.246094	0.348029	0.550282	0.744141	0.984375	1.23047	1.32526	1.53138	1.75396	2.02934	2.44864	2.75141	3.37286	4.18674	5.21463	6.99128	11.5808	26.2526
0.246094	0.348029	0.550282	0.744141	0.984375	1.23047	1.32526	1.53192	1.75396	2.02934	2.45554	2.75141	3.37306	4.19083	5.21489	7.00652	11.5814	26.3424
0.246094	0.348029	0.550282	0.744141	0.984375	1.23047	1.32526	1.53222	1.75396	2.02934	2.45554	2.75141	3.3738	4.19083	5.2168	7.05135	11.5978	26.4971
0.246094	0.348029	0.550282	0.744141	0.984375	1.23047	1.32526	1.54092	1.75396	2.02934	2.45818	2.75141	3.3738	4.20186	5.22044	7.0573	11.6238	26.5245
0.246094	0.348029	0.550282	0.744141	0.984375	1.23047	1.32526	1.54093	1.75396	2.02934	2.45992	2.75141	3.3738	4.20432	5.22044	7.0599	11.6767	26.5622
0.246094	0.348029	0.550282	0.744141	0.984375	1.23047	1.32526	1.55489	1.75396	2.04545	2.46094	2.75141	3.38204	4.20525	5.22044	7.09843	11.6767	26.6293
0.246094	0.348029	0.550282	0.744141	0.984375	1.23047	1.32526	1.55643	1.75396	2.04545	2.46094	2.75141	3.38925	4.20525	5.22044	7.10298	11.694	26.6521
0.246094	0.348029	0.550282	0.744141	0.984375	1.23047	1.32526	1.55643	1.75396	2.0581	2.46094	2.75141	3.39221	4.20773	5.23255	7.14185	11.723	26.8862
0.246094	0.348029	0.550282	0.744141	0.984375	1.23047	1.32526	1.55643	1.75396	2.059	2.46094	2.75141	3.40509	4.21245	5.23255	7.15906	11.7319	26.9048
0.246094	0.348029	0.550282	0.744141	0.984375	1.23047	1.32526	1.55643	1.75396	2.0736	2.46094	2.75313	3.41454	4.21245	5.23255	7.1748	11.7405	27.0759
0.246094	0.348029	0.550282	0.744141	0.984375	1.23047	1.32526	1.55643	1.75396	2.07884	2.46094	2.75853	3.41884	4.21245	5.24385	7.1748	11.7405	27.3707
0.246094	0.348029	0.550282	0.744141	0.984375	1.23047	1.32526	1.55643	1.75396	2.07886	2.46094	2.76279	3.41884	4.2168	5.25602	7.18367	11.7584	27.5142
0.246094	0.348029	0.550282	0.744141	0.984375	1.23047	1.32526	1.55643	1.75396	2.08261	2.46094	2.77325	3.41884	4.2168	5.26088	7.19763	11.7633	28.0469
0.246094	0.348029	0.550282	0.744141	0.984375	1.23047	1.32526	1.55643	1.75396	2.08369	2.46094	2.77325	3.41884	4.22409	5.26187	7.22323	11.7842	28.0644
0.246094	0.348029	0.550282	0.744141	0.984375	1.23047	1.32526	1.55643	1.75396	2.08817	2.46094	2.77325	3.41884	4.23238	5.27355	7.26264	11.7934	28.3873
0.246094	0.348029	0.550282	0.744141	0.984375	1.23047	1.32526	1.55643	1.75396	2.08817	2.46094	2.77325	3.41992	4.23396	5.28386	7.27651	11.8176	28.5564
0.246094	0.348029	0.550282	0.744141	0.984375	1.23047	1.32526	1.55643	1.75396	2.09165	2.46094	2.77325	3.42769	4.23396	5.30067	7.28787	11.8176	28.585
0.246094	0.348029	0.550282	0.744141	0.984375	1.23047	1.32526	1.55643	1.75396	2.09281	2.46094	2.77325	3.42769	4.23396	5.30102	7.28787	11.8381	28.6147
0.246094	0.348029	0.550282	0.744141	0.984375	1.23047	1.32526	1.55643	1.75396	2.10263	2.46094	2.77325	3.42769	4.23863	5.30102	7.30447	11.8764	28.62
0.246094	0.348029	0.550282	0.744141	0.984375	1.23047	1.32526	1.55643	1.75396	2.10263	2.46094	2.77325	3.43588	4.24588	5.30102	7.30447	11.8764	28.6749
0.246094	0.348029	0.550282	0.744141	0.984375	1.23047	1.32526	1.55643	1.75396	2.10263	2.46094	2.77325	3.44259	4.24588	5.30102	7.32474	11.8764	28.7551
0.246094	0.348029	0.550282	0.744141	0.984375	1.23047	1.32526	1.55643	1.75396	2.10475	2.46094	2.7752	3.44531	4.24824	5.30823	7.34571	11.8764	28.7972
0.246094	0.348029	0.550282	0.744141	0.984375	1.23047	1.32526	1.55643	1.75396	2.10475	2.46094	2.78423	3.44531	4.24824	5.30843	7.3746	11.8905	28.8098
0.246094	0.348029	0.550282	0.744141	0.984375	1.23047	1.32526	1.55956	1.76278	2.10475	2.46094	2.78587	3.44531	4.26756	5.31243	7.37496	11.9044	28.8695
0.246094	0.348029	0.550282	0.744141	0.984375	1.23047	1.32526	1.56879	1.76686	2.10475	2.46094	2.78933	3.44531	4.29784	5.31243	7.37496	11.9044	28.877
0.246094	0.348029	0.550282	0.744141	0.984375	1.23047	1.32526	1.56879	1.77461	2.10851	2.46094	2.80112	3.44531	4.29784	5.32382	7.37496	11.907	28.877
0.246094	0.348029	0.550282	0.746079	0.984375	1.23047	1.32526	1.56879	1.77461	2.11698	2.46094	2.8059	3.44531	4.29784	5.32382	7.38281	11.9192	28.877
0.246094	0.348029	0.550282	0.747626	0.984552	1.23047	1.32526	1.56879	1.77461	2.11698	2.46094	2.8059	3.44598	4.29784	5.32382	7.38691	11.9192	28.8929
0.246094	0.348029	0.550282	0.748545	0.986186	1.23047	1.32526	1.56879	1.77461	2.11698	2.46094	2.8059	3.44598	4.30488	5.34193	7.38691	11.9192	28.8972
0.246094	0.348029	0.550282	0.754563	0.989258	1.23047	1.32526	1.57216	1.77461	2.11698	2.46094	2.8059	3.45077	4.30488	5.3546	7.38691	11.9374	28.9053
0.246094	0.348029	0.550282	0.754796	0.99177	1.23047	1.32526	1.57408	1.77461	2.11698	2.46094	2.8059	3.45409	4.33195	5.3546	7.41394	11.9431	28.9702
0.246094	0.348029	0.550282	0.760977	0.992188	1.23047	1.33577	1.57552	1.77461	2.11698	2.46094	2.8059	3.45409	4.33195	5.36173	7.41963	11.9476	29.0225
0.246094	0.348029	0.550282	0.762609	0.992188	1.23047	1.33577	1.57577	1.77461	2.11698	2.46094	2.8059	3.45409	4.33195	5.37315	7.41963	11.9476	29.0276
0.246094	0.348029	0.550282	0.763542	0.992188	1.23047	1.33577	1.57577	1.77461	2.11698	2.46094	2.8059	3.45409	4.33195	5.39726	7.41963	11.9732	29.112
0.246094	0.348029	0.550282	0.765042	0.992188	1.23047	1.33577	1.57577	1.77461	2.11698	2.46094	2.80633	3.45489	4.33195	5.39726	7.44001	12.0083	29.112
0.246094	0.348029	0.550282	0.766699	0.992188	1.23047	1.33577	1.57577	1.77461	2.11698	2.46094	2.80633	3.45489	4.33195	5.39726	7.44001	12.0158	29.112
0.246094	0.348029	0.550282	0.767103	0.992188	1.23047	1.33577	1.57577	1.78028	2.11698	2.46094	2.80633	3.45596	4.33195	5.39726	7.44554	12.0424	29.1685
0.246094	0.348029	0.550282	0.772059	0.992188	1.23047	1.33577	1.57577	1.78425	2.11698	2.46094	2.81798	3.46761	4.33905	5.40286	7.44554	12.0821	29.2976
0.246094	0.348029	0.550282	0.773684	0.992188	1.23047	1.33577	1.57577	1.78869	2.11698	2.46094	2.82614	3.47472	4.33905	5.40286	7.45792	12.106	29.3629
0.246094	0.348029	0.550282	0.774578	0.992188	1.23047	1.33577	1.57577	1.78869	2.11698	2.46094	2.82817	3.47657	4.34764	5.40286	7.45792	12.1087	29.4182
0.246094	0.348029	0.550282	0.778091	0.992188	1.23047	1.33577	1.57577	1.78869	2.11698	2.46094	2.82817	3.48029	4.35384	5.41406	7.46205	12.134	29.4182
0.246094	0.348029	0.550282	0.778217	0.992188	1.23047	1.33577	1.57577	1.78869	2.11698	2.46094	2.82817	3.48029	4.36079	5.41406	7.46205	12.1471	29.6918
0.246094	0.348029	0.550282	0.778217	0.992188	1.23047	1.33577	1.57577	1.78869	2.11698	2.46094	2.83777	3.48029	4.36079	5.41743	7.48465	12.163	29.7325
0.246094	0.348029	0.550282	0.778217	0.992188	1.23047	1.33577	1.57577	1.78869	2.11698	2.46094	2.84341	3.48029	4.36079	5.41965	7.48465	12.181	29.8353
0.246094	0.348029	0.550282	0.778217	0.992188	1.23047	1.33577	1.57577	1.79034	2.11698	2.46094	2.84366	3.48029	4.36079	5.41965	7.50611	12.181	30.0295
0.246094	0.348029	0.550282	0.778217	0.992188	1.23047	1.33577	1.57577	1.79159	2.11698	2.46094	2.85754	3.48029	4.36079	5.41965	7.50726	12.2149	30.1374
0.246094	0.348029	0.550282	0.778217	0.992188	1.23047	1.33577	1.57577	1.79159	2.11698	2.46094	2.86302	3.48029	4.38157	5.43639	7.52937	12.2149	30.3055
0.246094	0.348029	0.550282	0.778217	0.992188	1.23047	1.33577	1.57577	1.79159	2.11698	2.47321	2.86359	3.48029	4.38617	5.44009	7.54405	12.2183	30.5196
0.246094	0.348029	0.550282	0.778217	0.992188	1.23047	1.33608	1.57577	1.79159	2.11698	2.47321	2.86992	3.48029	4.39274	5.44574	7.58899	12.2207	30.6473
0.246094	0.348029	0.550282	0.778217	0.992188	1.23047	1.35477	1.57577	1.79159	2.11698	2.47321	2.86992	3.48029	4.3954	5.44574	7.60902	12.2615	30.7144
0.246094	0.348029	0.550282	0.778217	0.992188	1.23047	1.35952	1.57577	1.79159	2.11698	2.47321	2.86992	3.48029	4.3954	5.44574	7.63878	12.2827	30.7253
0.246094	0.348029	0.550282	0.778217	0.992188	1.23047	1.36129	1.57577	1.79159	2.11698	2.47321	2.87173	3.48029	4.3954	5.46417	7.6408	12.2909	30.8237
0.246094	0.348029	0.550282	0.778217	0.992188	1.23047	1.36268	1.57577	1.79159	2.11698	2.47321	2.87686	3.48029	4.3954	5.46417	7.64477	12.2977	30.9267
0.246094	0.348029	0.550282	0.778217	0.992188	1.23047	1.36469	1.57577	1.79159	2.11698	2.47321	2.87998	3.4815	4.3954	5.46417	7.64674	12.2977	31.0117
0.246094	0.348029	0.550282	0.778217	0.992188	1.23047	1.36514	1.57577	1.79585	2.11698	2.47321	2.88045	3.4815	4.3954	5.46417	7.6614	12.2998	31.1287
0.246094	0.348029	0.550282	0.778217	0.992188	1.23047	1.37579	1.57577	1.80186	2.11698	2.47321	2.88438	3.49765	4.3954	5.46417	7.66455	12.3452	31.1569
0.246094	0.348029	0.550282	0.778217	0.992188	1.23047	1.3787	1.57577	1.80581	2.11931	2.47321	2.88531	3.50791	4.39717	5.46417	7.66455	12.3492	31.3033
0.246094	0.348029	0.550282	0.778217	0.992188	1.23047	1.381	1.57577	1.80581	2.12088	2.47321	2.88595	3.52353	4.40226	5.46417	7.66455	12.3856	31.4095
0.246094	0.348029	0.550282	0.778217	0.992188	1.23047	1.38125	1.57577	1.80581	2.12831	2.47321	2.8863	3.52353	4.40226	5.49885	7.66798	12.4962	31.501
0.246094	0.348029	0.550282	0.778217	0.992188	1.23047	1.38224	1.57577	1.80581	2.13378	2.47321	2.88667	3.52353	4.41635	5.50282	7.66868	12.5527	31.642
0.246094	0.348029	0.550282	0.778217	0.992188	1.23047	1.38232	1.57577	1.80881	2.13378	2.47321	2.8927	3.52353	4.41635	5.50282	7.67544	12.6373	31.7699
0.246094	0.348029	0.550282	0.778217	0.992188	1.23047	1.38389	1.57577	1.81139	2.13378	2.47321	2.8927	3.52353	4.42513	5.53027	7.68844	12.648	31.9164
0.246094	0.348029	0.550282	0.778217	0.992188	1.23047	1.38729	1.57577	1.82469	2.13378	2.47321	2.89644	3.52541	4.42969	5.53027	7.68945	12.6698	31.9509
0.246094	0.348029	0.550282	0.778217	0.992188	1.23047	1.38736	1.57577	1.82958	2.13378	2.47321	2.90331	3.54427	4.43652	5.53027	7.69345	12.6699	31.9553
0.246094	0.348029	0.550282	0.778217	0.992188	1.23047	1.39212	1.57577	1.8351	2.13378	2.47727	2.90331	3.54544	4.43652	5.53641	7.69345	12.6771	32.0489
0.246094	0.348029	0.550282	0.778217	0.992188	1.23047	1.39212	1.57577	1.83634	2.13378	2.48047	2.90331	3.55122	4.43652	5.5375	7.70145	12.6989	32.0584
0.246094	0.348029	0.550282	0.778217	0.992188	1.23047	1.39212	1.57577	1.83843	2.13378	2.48047	2.90331	3.55149	4.43652	5.5465	7.7193	12.7637	32.4135
0.246094	0.348029	0.550282	0.778217	0.992188	1.23047	1.39212	1.57577	1.84213	2.13378	2.48047	2.90342	3.55149	4.43652	5.56847	7.75164	12.769	32.5886
0.246094	0.348029	0.550282	0.778217	0.996941	1.23047	1.39212	1.57577	1.85896	2.13378	2.48047	2.92897	3.55149	4.43652	5.57416	7.75205	12.7898	32.687
0.246094	0.348029	0.550282	0.778217	0.998049	1.23047	1.39212	1.57577	1.87419	2.13378	2.48047	2.93082	3.55149	4.43652	5.59619	7.75758	12.7992	32.7009
0.246094	0.348029	0.550282	0.778217	1.00383	1.23047	1.39212	1.57577	1.87419	2.13378	2.48047	2.94185	3.55149	4.43652	5.6118	7.77049	12.8027	32.8643
0.246094	0.348029	0.550282	0.778217	1.00403	1.23047	1.39212	1.57577	1.87419	2.13378	2.48047	2.94761	3.55149	4.43652	5.6118	7.79535	12.8116	33.0756
0.246094	0.348029	0.550282	0.778217	1.0054	1.23047	1.39212	1.57577	1.87419	2.13378	2.48047	2.95312	3.55768	4.43652	5.61321	7.8104	12.8339	33.1286
0.246094	0.348029	0.550282	0.778217	1.00726	1.23047	1.39212	1.57577	1.87419	2.15067	2.48047	2.95312	3.58318	4.43652	5.61719	7.84393	12.8339	33.2673
0.246094	0.348029	0.550282	0.778217	1.00771	1.23047	1.39212	1.57577	1.87419	2.16116	2.48047	2.95312	3.58318	4.4372	5.61719	7.84804	12.8493	33.3255
0.246094	0.348029	0.550282	0.778217	1.0097	1.23047	1.39212	1.57577	1.87419	2.16302	2.49284	2.95312	3.58318	4.45695	5.62258	7.88305	12.9365	33.35
0.246094	0.348029	0.550282	0.778217	1.01279	1.23047	1.39212	1.57577	1.87419	2.17925	2.49284	2.95312	3.58318	4.45695	5.62258	7.88305	12.9484	33.447
0.246094	0.348029	0.550282	0.778217	1.01467	1.23047	1.39212	1.57577	1.87419	2.18213	2.49284	2.95312	3.60635	4.45695	5.62258	7.90953	12.9965	33.651
0.246094	0.348029	0.550282	0.778217	1.01467	1.23047	1.39212	1.57974	1.87419	2.18276	2.4953	2.95312	3.61144	4.47173	5.62258	7.92483	13.0219	33.7229
0.246094	0.348029	0.550282	0.778217	1.01467	1.23047	1.39212	1.58827	1.87419	2.18632	2.49716	2.95312	3.61162	4.49023	5.63343	7.92483	13.043	33.8448
0.246094	0.348029	0.550282	0.778217	1.01467	1.23047	1.39212	1.58827	1.87419	2.19101	2.49982	2.95312	3.61162	4.49079	5.64674	7.93628	13.0549	33.9083
0.246094	0.348029	0.550282	0.778217	1.01467	1.23047	1.39212	1.58827	1.87419	2.20113	2.50209	2.95312	3.63353	4.49079	5.64709	7.94153	13.0627	33.9083
0.246094	0.348029	0.550282	0.778217	1.01467	1.23047	1.39212	1.58827	1.8797	2.20113	2.50967	2.96336	3.63353	4.49079	5.66016	7.97055	13.098	33.9083
0.246094	0.348029	0.550282	0.778217	1.01467	1.23047	1.39331	1.58827	1.88907	2.20648	2.50967	2.96336	3.63353	4.49232	5.6655	7.98773	13.1009	33.9832
0.246094	0.348029	0.550282	0.778217	1.01467	1.23047	1.39773	1.58827	1.88907	2.21105	2.50967	2.96336	3.63353	4.49811	5.6655	7.99927	13.1429	34.0402
0.246094	0.348029	0.550282	0.778217	1.01467	1.23047	1.40258	1.58827	1.88907	2.21484	2.50967	2.96336	3.64307	4.51768	5.6655	7.99927	13.1447	34.2601
0.246094	0.348029	0.550282	0.778217	1.01467	1.23047	1.40317	1.58827	1.88907	2.21484	2.50967	2.96336	3.65331	4.51768	5.66721	8.01464	13.1562	34.2734
0.246094	0.348029	0.550282	0.778217	1.01467	1.23047	1.40317	1.58827	1.88907	2.21484	2.50967	2.96336	3.65845	4.51768	5.68152	8.01601	13.2118	34.461
0.246094	0.348029	0.550282	0.778217	1.01467	1.23047	1.40317	1.58827	1.88907	2.21484	2.50967	2.96336	3.65845	4.51768	5.68152	8.03488	13.2982	34.5041
0.246094	0.348029	0.550282	0.778217	1.01467	1.23047	1.40317	1.58827	1.88907	2.21484	2.50967	2.96336	3.65845	4.52166	5.68152	8.03488	13.3	34.6791
0.246094	0.348029	0.550282	0.778217	1.01467	1.23047	1.40317	1.58827	1.88979	2.21484	2.50967	2.96336	3.65845	4.52438	5.68152	8.04617	13.3096	34.7507
0.246094	0.348029	0.550282	0.778217	1.01467	1.23047	1.40317	1.58827	1.89476	2.21484	2.50967	2.97356	3.65845	4.52438	5.69636	8.06032	13.3459	35.1673
0.246094	0.348793	0.550282	0.778217	1.01467	1.23047	1.40317	1.58827	1.90793	2.21484	2.50967	2.97356	3.65845	4.52813	5.70239	8.07248	13.3577	35.1914
0.246094	0.350326	0.550282	0.778217	1.01467	1.23047	1.40317	1.58827	1.90957	2.21484	2.50967	2.97356	3.65845	4.53774	5.70508	8.07963	13.4043	35.1914
0.246094	0.350602	0.550282	0.778217	1.01467	1.23047	1.40317	1.58827	1.91643	2.21484	2.50967	2.97356	3.65845	4.53774	5.71047	8.09495	13.445	35.5058
0.246094	0.350791	0.550282	0.778217	1.01467	1.23047	1.40317	1.58827	1.91643	2.21484	2.50967	2.97656	3.65845	4.53774	5.72399	8.09495	13.5441	35.7684
0.246094	0.350791	0.550282	0.778217	1.01467	1.23047	1.40317	1.58827	1.92205	2.21484	2.50991	2.9812	3.65845	4.54218	5.72399	8.09865	13.6132	35.8766
0.246094	0.350791	0.550282	0.778217	1.01467	1.23047	1.40317	1.58827	1.92205	2.21484	2.52342	2.98688	3.65845	4.55332	5.74512	8.10706	13.6696	35.9297
0.246094	0.350791	0.550282	0.778217	1.01467	1.23047	1.40317	1.58827	1.92205	2.21484	2.52426	2.98688	3.65845	4.55354	5.74512	8.11003	13.6776	36.0626
0.246094	0.350791	0.550282	0.778217	1.01467	1.23047	1.41072	1.58827	1.92205	2.21484	2.53014	2.98688	3.65845	4.55354	5.75037	8.12482	13.6819	36.1364
0.246094	0.350791	0.550282	0.778217	1.01467	1.23047	1.41624	1.58827	1.92205	2.21484	2.53369	2.98969	3.65845	4.55354	5.76091	8.12519	13.6966	36.1892
0.246094	0.350791	0.550282	0.778217	1.01467	1.23047	1.41687	1.58827	1.92205	2.21484	2.53369	2.99386	3.66091	4.55354	5.76091	8.15087	13.7423	36.2218
0.246094	0.350791	0.550282	0.778217	1.01467	1.23047	1.41982	1.58833	1.92205	2.21484	2.53369	2.99386	3.66237	4.57376	5.76246	8.19096	13.7526	36.6027
0.246094	0.350791	0.550282	0.778217	1.01467	1.23047	1.42415	1.59749	1.92205	2.2186	2.53369	2.99386	3.68018	4.57376	5.76616	8.19163	13.7571	36.6688
0.246094	0.350791	0.550282	0.778217	1.01467	1.23047	1.43364	1.60028	1.92205	2.2186	2.53369	2.99386	3.68748	4.57761	5.76616	8.21181	13.801	36.7084
0.246094	0.350791	0.550282	0.778217	1.01467	1.23047	1.43496	1.60157	1.92205	2.2186	2.53369	2.99386	3.68748	4.57761	5.76616	8.21378	13.801	36.7307
0.246094	0.350791	0.550282	0.778217	1.01467	1.23047	1.43496	1.60448	1.92205	2.2186	2.53369	2.99716	3.68748	4.57983	5.76616	8.25424	13.8164	36.996
0.246094	0.350791	0.550282	0.778217	1.01467	1.23047	1.43496	1.60685	1.92205	2.2186	2.53369	2.99716	3.68748	4.58069	5.76942	8.25665	13.8307	37.2017
0.246094	0.350791	0.550282	0.778217	1.01467	1.23047	1.43496	1.61237	1.92205	2.2186	2.53369	2.99716	3.68748	4.58123	5.79236	8.27256	13.8361	37.3625
0.246094	0.350791	0.550282	0.778217	1.01467	1.23047	1.43496	1.61678	1.92205	2.2186	2.53369	3.00349	3.68748	4.59741	5.79236	8.31605	13.8361	37.3706
0.246094	0.350791	0.550282	0.778217	1.01467	1.23047	1.43496	1.61776	1.92205	2.2186	2.53369	3.00396	3.68748	4.59741	5.80802	8.31975	13.8361	37.3868
0.246094	0.350791	0.550282	0.778217	1.01467	1.23047	1.43496	1.62726	1.92205	2.22246	2.53369	3.00396	3.69141	4.59741	5.81016	8.31975	13.8361	37.4532
0.246094	0.350791	0.550282	0.778217	1.01467	1.23047	1.43496	1.62769	1.92205	2.22645	2.53369	3.00396	3.69141	4.59741	5.82912	8.31975	13.8393	37.4839
0.246094	0.350791	0.550282	0.778217	1.01467	1.23047	1.43496	1.63978	1.92205	2.22847	2.53369	3.00396	3.69141	4.59741	5.83403	8.31975	13.9009	37.5259
0.246094	0.350791	0.550282	0.778217	1.01467	1.23047	1.43496	1.64626	1.92205	2.22847	2.53369	3.01144	3.69141	4.59741	5.83403	8.32728	13.9581	37.5517
0.246094	0.350791	0.550282	0.778217	1.01467	1.23047	1.43496	1.649	1.92205	2.22847	2.53369	3.01474	3.69141	4.59741	5.84958	8.33821	13.9581	37.5565
0.246094	0.350791	0.550282	0.778217	1.01467	1.23047	1.43496	1.65014	1.92205	2.22874	2.53369	3.01762	3.69141	4.59741	5.84958	8.3527	13.9841	37.6169
0.246094	0.350791	0.550282	0.778217	1.01467	1.23047	1.43496	1.65085	1.92205	2.23242	2.53487	3.01767	3.69141	4.59741	5.87025	8.35995	14.0122	37.6266
0.246094	0.350791	0.550282	0.778217	1.01467	1.23047	1.43496	1.65085	1.92205	2.23242	2.54804	3.01829	3.69141	4.59741	5.88033	8.4177	14.0769	37.6531
0.246094	0.350791	0.550712	0.778217	1.01467	1.23047	1.43496	1.65085	1.92205	2.23242	2.54833	3.02417	3.69141	4.59741	5.88033	8.4177	14.0812	37.6652
0.246094	0.350791	0.55465	0.781126	1.01467	1.23047	1.43496	1.65085	1.92205	2.23242	2.55347	3.0278	3.69141	4.59741	5.90625	8.4263	14.0951	37.6773
0.246094	0.350791	0.55465	0.783721	1.01467	1.23047	1.43496	1.65085	1.92205	2.23242	2.5538	3.0278	3.69141	4.61057	5.91137	8.46636	14.1048	37.8992
0.246094	0.350791	0.55465	0.784393	1.01467	1.23047	1.43496	1.65085	1.93731	2.23242	2.5538	3.0278	3.69141	4.61187	5.91684	8.46636	14.1327	37.9016
0.246094	0.350791	0.55465	0.784393	1.01467	1.23047	1.43496	1.65085	1.93731	2.23242	2.5538	3.0348	3.69141	4.61199	5.92672	8.46636	14.1819	38.0969
0.246094	0.350791	0.55465	0.784393	1.01467	1.23047	1.43496	1.65085	1.93731	2.24496	2.5538	3.03542	3.69141	4.61309	5.93362	8.47506	14.2416	38.2333
0.246094	0.350791	0.55465	0.784393	1.01467	1.23047	1.43496	1.65085	1.93731	2.24616	2.5538	3.04401	3.6921	4.61394	5.94712	8.47506	14.2772	38.3567
0.246094	0.350791	0.55465	0.784393	1.01467	1.23047	1.43496	1.65085	1.93731	2.24616	2.5538	3.04401	3.69514	4.61689	5.94712	8.48577	14.3073	38.3906
0.246094	0.350791	0.55465	0.784393	1.01467	1.23047	1.43496	1.65085	1.93731	2.24616	2.55413	3.04401	3.6996	4.62013	5.95221	8.48896	14.3867	38.6375
0.246094	0.350791	0.55465	0.784393	1.01467	1.23047	1.43496	1.65085	1.93731	2.24616	2.56929	3.04442	3.6996	4.62368	5.95287	8.50004	14.3889	39.0128
0.246094	0.350791	0.55465	0.784393	1.01467	1.23047	1.43496	1.65085	1.93731	2.24616	2.56929	3.04505	3.6996	4.62368	5.95637	8.53512	14.4281	39.1297
0.246094	0.350791	0.55465	0.784393	1.01467	1.23047	1.43496	1.65085	1.93731	2.24616	2.56929	3.04672	3.6996	4.62368	5.9573	8.54268	14.4757	39.2595
0.246094	0.350791	0.55465	0.784393	1.01467	1.23047	1.43496	1.65295	1.93731	2.24616	2.56929	3.05611	3.6996	4.62934	5.9573	8.54354	14.4911	39.3918
0.246094	0.350791	0.55465	0.784393	1.01467	1.23047	1.43496	1.66395	1.93731	2.24616	2.56929	3.05742	3.6996	4.6339	5.9573	8.58511	14.5279	39.5205
0.246094	0.350791	0.55465	0.784393	1.01467	1.23047	1.43496	1.66395	1.93731	2.24844	2.56929	3.06378	3.70755	4.64139	5.95829	8.61266	14.532	39.5477
0.246094	0.350791	0.55465	0.784393	1.01467	1.23047	1.43496	1.66395	1.93731	2.26186	2.56929	3.06478	3.72407	4.64329	5.95994	8.62832	14.5383	39.6242
0.246094	0.350791	0.55465	0.784393	1.01467	1.23047	1.43496	1.66395	1.93731	2.26887	2.56929	3.06817	3.72407	4.64329	5.96766	8.65214	14.5529	39.8588
0.246094	0.350791	0.55465	0.784393	1.01467	1.2319	1.43496	1.66395	1.93731	2.26887	2.56929	3.07034	3.72407	4.64329	5.97693	8.6781	14.5631	39.9132
0.246094	0.350791	0.55465	0.784393	1.01621	1.23323	1.43496	1.66871	1.93731	2.26887	2.57477	3.07518	3.72896	4.64551	5.98772	8.70073	14.5695	39.9681
0.246094	0.350791	0.55465	0.784393	1.02272	1.23337	1.43496	1.67272	1.93731	2.26887	2.5765	3.08355	3.72896	4.65763	5.98772	8.70769	14.5927	40.0801
0.246094	0.350791	0.55465	0.784393	1.02272	1.23387	1.43496	1.67896	1.93731	2.26887	2.58759	3.08355	3.74557	4.66038	5.99277	8.71347	14.6369	40.1744
0.246094	0.350791	0.55465	0.784393	1.02272	1.23478	1.43496	1.67907	1.93731	2.26887	2.58843	3.09475	3.74839	4.66038	5.99277	8.72853	14.6379	40.2309
0.246094	0.350791	0.55465	0.784393	1.02272	1.23503	1.43496	1.68476	1.93731	2.26887	2.58969	3.10802	3.74839	4.6693	5.99277	8.73815	14.6432	40.267
0.246094	0.350791	0.55465	0.784393	1.02272	1.24023	1.43496	1.69542	1.94164	2.26887	2.58969	3.10802	3.74839	4.67578	5.99277	8.78386	14.6524	40.3158
0.246094	0.350791	0.55465	0.784393	1.02272	1.24023	1.43496	1.70024	1.9446	2.26887	2.58969	3.10802	3.75363	4.67578	5.99945	8.79419	14.6537	40.3901
0.246094	0.350791	0.55465	0.784393	1.02272	1.24023	1.43496	1.70132	1.95471	2.26887	2.59219	3.10802	3.75646	4.67578	6.00791	8.8217	14.7738	40.4448
0.246094	0.351816	0.55465	0.784393	1.02272	1.24023	1.43496	1.70943	1.95876	2.26887	2.5927	3.10802	3.75646	4.68014	6.03306	8.85357	14.8168	40.5896
0.246094	0.353236	0.55465	0.784393	1.02272	1.24023	1.43496	1.70984	1.96016	2.26887	2.59302	3.10922	3.76295	4.68014	6.03306	8.89008	14.8168	40.7209
0.246094	0.358132	0.55465	0.784393	1.02272	1.24023	1.43496	1.71112	1.96875	2.26887	2.59436	3.11265	3.76451	4.68014	6.05291	8.90804	14.8168	40.7543
0.246094	0.358998	0.55465	0.784393	1.02272	1.24023	1.43496	1.71693	1.96875	2.26887	2.59827	3.11287	3.76451	4.68225	6.06276	8.91729	14.8678	41.1496
0.246094	0.359285	0.55465	0.784393	1.02272	1.24023	1.43496	1.72266	1.96875	2.26887	2.60082	3.11374	3.76451	4.68507	6.07603	8.91729	14.8739	41.8801
0.246094	0.36163	0.55465	0.784393	1.02272	1.24023	1.43496	1.72266	1.96875	2.26887	2.60322	3.11705	3.76451	4.69352	6.07807	8.94346	14.88	41.9465
0.246094	0.364126	0.55465	0.784393	1.02272	1.24023	1.43496	1.72266	1.96875	2.26887	2.61601	3.12113	3.77814	4.70161	6.07807	8.95795	14.8849	42.0871
0.246094	0.365534	0.55465	0.784393	1.02272	1.24023	1.43496	1.72266	1.96875	2.26887	2.61601	3.12488	3.77814	4.71304	6.07807	8.95795	14.9014	42.1539
0.246094	0.365534	0.55465	0.784393	1.02272	1.24023	1.43496	1.72266	1.96875	2.26887	2.62013	3.12981	3.77814	4.72731	6.12631	9.01882	14.9308	42.5002
0.246094	0.368382	0.55465	0.784393	1.02272	1.24023	1.43496	1.72266	1.96875	2.26887	2.62825	3.13226	3.77814	4.72731	6.12631	9.02057	14.9491	42.8076
0.246094	0.368545	0.55465	0.784393	1.02272	1.24023	1.43496	1.72266	1.96875	2.26914	2.63283	3.1326	3.77814	4.73371	6.13626	9.02904	14.9875	42.8323
0.246094	0.369499	0.55465	0.784989	1.02272	1.24023	1.43496	1.72266	1.96875	2.27035	2.63677	3.13557	3.77814	4.73371	6.15234	9.02904	15.0258	42.8853
0.246094	0.371615	0.55465	0.786051	1.02272	1.24023	1.43496	1.72266	1.96875	2.27175	2.63677	3.13757	3.77814	4.73621	6.15234	9.05286	15.0661	43.1472
0.246094	0.372946	0.555471	0.79216	1.02272	1.24023	1.43496	1.72266	1.96875	2.27703	2.63677	3.13757	3.78627	4.73893	6.15234	9.10547	15.0677	43.2145
0.246094	0.3748	0.560707	0.794685	1.02272	1.24023	1.43496	1.72266	1.96875	2.28052	2.64083	3.13757	3.78627	4.75072	6.15234	9.10547	15.1102	43.3195
0.246094	0.374839	0.565739	0.797118	1.02272	1.24023	1.43496	1.72266	1.96875	2.28688	2.64743	3.14455	3.8204	4.76625	6.15234	9.11011	15.1102	43.4716
0.246094	0.375075	0.566484	0.798439	1.02272	1.24023	1.43496	1.72266	1.96875	2.28688	2.65051	3.14818	3.8204	4.77828	6.15726	9.14529	15.1242	43.4779
0.246094	0.375654	0.567755	0.798844	1.02272	1.24023	1.43496	1.72266	1.96875	2.28688	2.65051	3.15154	3.8204	4.79058	6.15726	9.15131	15.1263	43.4869
0.246094	0.377547	0.57168	0.799156	1.02272	1.24023	1.43496	1.72266	1.96875	2.28688	2.65051	3.15154	3.8204	4.79739	6.16174	9.15522	15.1309	43.5892
0.246094	0.377663	0.573748	0.80046	1.02272	1.24023	1.43496	1.72266	1.96875	2.28688	2.65051	3.15154	3.8204	4.80445	6.16709	9.15852	15.1329	43.5975
0.246094	0.378078	0.576923	0.801057	1.02272	1.24023	1.43496	1.72266	1.96875	2.28688	2.65051	3.15154	3.82832	4.8162	6.172	9.16439	15.1329	43.7133
0.246094	0.378318	0.580865	0.801421	1.02272	1.24023	1.43496	1.72266	1.96875	2.28688	2.65051	3.15154	3.82832	4.83498	6.172	9.17773	15.1329	43.822
0.246094	0.381722	0.584261	0.805423	1.02272	1.24023	1.43496	1.72266	1.96875	2.28837	2.65051	3.15154	3.82832	4.83498	6.172	9.19639	15.1329	43.9524
0.246094	0.383139	0.586615	0.80597	1.02272	1.24023	1.43496	1.72266	1.96875	2.29156	2.65051	3.15338	3.82832	4.83498	6.172	9.21419	15.1563	43.9909
0.246094	0.385347	0.587327	0.807172	1.02272	1.24023	1.43496	1.72266	1.96875	2.30138	2.65051	3.15538	3.84389	4.83498	6.172	9.21787	15.1623	44.1009
0.246094	0.387515	0.587804	0.807211	1.02839	1.24023	1.43496	1.72266	1.96875	2.31261	2.65051	3.17606	3.84411	4.83498	6.172	9.21787	15.1882	44.1085
0.246094	0.388423	0.588821	0.813675	1.02881	1.24023	1.43496	1.72266	1.96875	2.31428	2.65051	3.17655	3.84411	4.83498	6.19648	9.22441	15.1882	44.2476
0.246094	0.389599	0.59187	0.814148	1.03003	1.24023	1.44447	1.72266	1.96875	2.31862	2.66191	3.17655	3.84411	4.83498	6.19648	9.23121	15.2021	44.3795
0.246094	0.390766	0.59481	0.817245	1.03116	1.24023	1.44479	1.72266	1.96875	2.31866	2.66191	3.19342	3.84411	4.83975	6.22098	9.23921	15.218	44.4129
0.246094	0.390975	0.594981	0.817337	1.03127	1.24023	1.44514	1.72266	1.97848	2.32164	2.66973	3.19459	3.84411	4.84748	6.22098	9.25064	15.2521	44.4504
0.246094	0.391132	0.595447	0.821003	1.03179	1.24023	1.44635	1.72266	1.98037	2.32164	2.67155	3.19922	3.85072	4.84748	6.22098	9.26115	15.3568	44.5538
0.246094	0.394184	0.59573	0.821019	1.03415	1.24023	1.44635	1.72266	1.98407	2.32164	2.67155	3.19922	3.85198	4.84748	6.22573	9.2678	15.3764	44.676
0.246094	0.394976	0.596863	0.821249	1.03915	1.24023	1.44635	1.72266	1.98407	2.32164	2.67155	3.19922	3.85198	4.84748	6.22573	9.27885	15.3789	44.7627
0.246094	0.395121	0.596978	0.823903	1.04019	1.24023	1.44635	1.72266	1.98407	2.32164	2.67155	3.19922	3.85198	4.84748	6.2306	9.28658	15.4297	45.0378
0.246094	0.395231	0.597045	0.827982	1.04229	1.24023	1.44635	1.72266	1.98407	2.32164	2.67155	3.19922	3.85198	4.85373	6.23693	9.33724	15.5401	45.0681
0.246094	0.396041	0.598641	0.831257	1.04409	1.24023	1.44635	1.72266	1.98407	2.32164	2.67155	3.19922	3.8587	4.85924	6.2372	9.3386	15.554	45.1023
0.246094	0.396154	0.598691	0.831458	1.04409	1.24023	1.44635	1.72266	1.98407	2.32164	2.67155	3.19922	3.88255	4.8643	6.25797	9.3449	15.5698	45.207
0.246094	0.396319	0.60364	0.83303	1.04409	1.24023	1.44635	1.72266	1.98407	2.32164	2.67168	3.19922	3.88255	4.87241	6.26452	9.35412	15.5968	45.2766
0.246094	0.39663	0.604418	0.83552	1.04409	1.24023	1.44635	1.72684	1.98407	2.32164	2.67525	3.19922	3.88255	4.87335	6.27418	9.35724	15.6183	45.2772
0.246094	0.396881	0.60543	0.836894	1.04409	1.24023	1.44635	1.72689	1.98407	2.32164	2.67992	3.19922	3.89006	4.87335	6.27418	9.36028	15.6191	45.5599
0.246094	0.397704	0.607244	0.839942	1.04409	1.24023	1.44635	1.73633	1.98407	2.32164	2.68304	3.19922	3.89108	4.87335	6.27418	9.37097	15.6191	45.5646
0.246094	0.400222	0.607429	0.843207	1.04409	1.24023	1.44635	1.73633	1.98407	2.32164	2.68304	3.19922	3.89108	4.88482	6.27418	9.37097	15.6248	46.036
0.246094	0.401058	0.608533	0.845198	1.04409	1.24023	1.44635	1.73633	1.98407	2.32164	2.68304	3.19922	3.89108	4.89225	6.27418	9.3767	15.627	46.0728
0.246094	0.401217	0.608582	0.845347	1.04409	1.24023	1.44635	1.73633	1.98407	2.32164	2.68304	3.19922	3.89108	4.89783	6.28005	9.38981	15.6303	46.0827
0.246094	0.401378	0.60878	0.845472	1.04409	1.24023	1.44635	1.73633	1.98407	2.32164	2.68304	3.19922	3.89108	4.90338	6.28606	9.41519	15.6663	46.1831
0.246094	0.40157	0.613543	0.846749	1.04409	1.24023	1.44635	1.73633	1.98407	2.32164	2.69211	3.19922	3.89108	4.90338	6.31153	9.41932	15.729	46.2113
0.246094	0.401905	0.615987	0.8505	1.04409	1.24023	1.44635	1.73633	1.98407	2.32164	2.69477	3.20236	3.89108	4.90338	6.31556	9.42776	15.7385	46.3839
0.246094	0.404394	0.621316	0.851355	1.04409	1.24023	1.44635	1.73633	1.98407	2.32164	2.69509	3.20867	3.89108	4.90338	6.32398	9.42904	15.7391	46.5813
0.246094	0.405896	0.62239	0.853823	1.04409	1.24023	1.44635	1.74015	1.98407	2.32164	2.69714	3.20867	3.89108	4.91108	6.32398	9.42904	15.7519	46.5943
0.246094	0.408018	0.62484	0.854328	1.04409	1.24023	1.44635	1.74015	1.98407	2.32164	2.70226	3.20867	3.89108	4.91177	6.32705	9.442	15.7544	46.9059
0.246094	0.408064	0.626833	0.854688	1.04409	1.24023	1.44635	1.74015	1.98407	2.32164	2.70703	3.20867	3.89108	4.91791	6.35094	9.44317	15.766	46.962
0.246094	0.408441	0.627638	0.857883	1.04409	1.24023	1.44635	1.74015	1.98438	2.32164	2.70703	3.20867	3.89108	4.92188	6.35094	9.44534	15.9677	47.0271
0.246094	0.410368	0.62773	0.858753	1.04409	1.24023	1.44635	1.74015	1.98438	2.32164	2.70703	3.20867	3.89108	4.92188	6.37727	9.44534	15.9961	47.0837
0.246094	0.412727	0.628667	0.859048	1.04409	1.24023	1.44874	1.74015	1.98438	2.32164	2.70703	3.2119	3.89108	4.92188	6.38167	9.44534	16.0139	47.1692
0.246094	0.412795	0.628822	0.862137	1.04409	1.24023	1.44991	1.74015	1.98438	2.32164	2.70703	3.21204	3.89108	4.92188	6.38664	9.45067	16.0245	47.2378
0.246094	0.41631	0.633583	0.862348	1.04409	1.24023	1.45087	1.74015	1.98438	2.32164	2.70703	3.21218	3.89108	4.92188	6.38897	9.46742	16.0388	47.2603
0.246094	0.417186	0.635048	0.86287	1.04409	1.24023	1.46148	1.74015	1.98438	2.32164	2.70703	3.21272	3.89108	4.92359	6.38897	9.49731	16.0848	47.3275
0.246094	0.417792	0.636242	0.863305	1.0457	1.24023	1.466	1.74015	1.98438	2.32164	2.70703	3.22461	3.89108	4.92802	6.39844	9.50473	16.0944	47.5954
0.246094	0.420199	0.638037	0.864675	1.04586	1.24023	1.47094	1.74015	1.98438	2.32164	2.70703	3.22461	3.92062	4.92802	6.40961	9.50703	16.0944	47.6304
0.246094	0.421994	0.638568	0.865921	1.04807	1.24023	1.47124	1.74015	1.98438	2.32164	2.70703	3.22461	3.92197	4.9423	6.41734	9.50703	16.125	48.1087
0.246094	0.422513	0.639038	0.868787	1.04969	1.24023	1.47248	1.74015	1.98585	2.33097	2.70703	3.22461	3.92197	4.95254	6.44089	9.52717	16.1288	48.5872
0.246094	0.422839	0.639181	0.869142	1.05237	1.24023	1.47497	1.74015	1.99286	2.3312	2.70703	3.22461	3.92197	4.95254	6.44408	9.52965	16.1768	49.1029
0.246094	0.423954	0.639931	0.869523	1.05237	1.24023	1.47656	1.74015	1.99982	2.33465	2.70703	3.22461	3.92197	4.95254	6.4456	9.54255	16.1787	49.4214
0.246094	0.427919	0.640705	0.87398	1.05237	1.24023	1.47656	1.74015	1.99982	2.33465	2.70703	3.23414	3.92197	4.96094	6.44922	9.54578	16.3022	49.5407
0.246094	0.428401	0.647702	0.876685	1.05237	1.24023	1.47656	1.74015	1.99982	2.33465	2.70703	3.23414	3.92515	4.96713	6.45399	9.55013	16.3092	49.6018
0.246094	0.431282	0.650504	0.878993	1.05237	1.24023	1.47656	1.74015	1.99982	2.33591	2.70703	3.23579	3.9375	4.97694	6.45967	9.57152	16.3611	49.7694
0.246094	0.431611	0.650796	0.879393	1.05237	1.24023	1.47656	1.74015	1.99982	2.34007	2.70703	3.23637	3.9375	4.97694	6.45967	9.57474	16.3999	49.8867
0.246094	0.43164	0.651809	0.88036	1.05237	1.24023	1.47656	1.74015	1.99982	2.34007	2.71061	3.23686	3.9375	4.97694	6.45967	9.5784	16.403	51.2874
0.246094	0.434611	0.653083	0.880581	1.05237	1.24023	1.47656	1.74015	1.99982	2.34007	2.71433	3.23686	3.94368	4.98302	6.46827	9.57988	16.4236	51.3653
0.246094	0.436069	0.654388	0.880868	1.05237	1.24023	1.47656	1.74015	1.99982	2.34007	2.7174	3.26255	3.96814	4.98302	6.48442	9.58503	16.4515	51.8704
0.246094	0.438949	0.656236	0.882613	1.05237	1.2426	1.47656	1.74015	1.99982	2.34007	2.71819	3.26255	3.96814	4.98302	6.50172	9.59682	16.5176	52.1237
0.246094	0.439221	0.658394	0.884384	1.05237	1.24334	1.47656	1.74015	1.99982	2.34007	2.71819	3.26255	3.96814	4.98302	6.50906	9.60081	16.53	52.5449
0.246094	0.441358	0.660882	0.88587	1.05247	1.24366	1.47656	1.74015	1.99982	2.34007	2.71819	3.2833	3.96814	4.98568	6.51568	9.60081	16.6054	52.5939
0.246094	0.441461	0.663602	0.885998	1.0532	1.25045	1.47656	1.74015	1.99982	2.35318	2.71819	3.2833	3.96814	5.01644	6.52287	9.60802	16.6265	52.6692
0.246094	0.444284	0.66563	0.887304	1.05499	1.25158	1.47656	1.74015	2.00064	2.35318	2.71819	3.2833	3.96875	5.01935	6.5269	9.6324	16.7519	52.7175
0.246094	0.444593	0.665941	0.887304	1.05504	1.25264	1.47656	1.74015	2.01774	2.35318	2.71819	3.2833	3.97577	5.02257	6.53887	9.6324	16.7537	52.7961
0.246094	0.445554	0.668462	0.887304	1.05738	1.25484	1.47656	1.74015	2.02248	2.35735	2.72852	3.28972	3.97577	5.02257	6.54059	9.6324	16.7723	52.842
0.246094	0.44589	0.672613	0.887304	1.06128	1.25484	1.47656	1.74015	2.02365	2.35791	2.72987	3.29609	3.97577	5.03029	6.55275	9.65565	16.839	53.4313
0.246094	0.445941	0.673268	0.887304	1.06888	1.25484	1.47656	1.74015	2.02849	2.36038	2.73059	3.30169	3.97577	5.04942	6.55332	9.65657	16.8644	53.6688
0.246094	0.447134	0.675697	0.887304	1.06906	1.25484	1.47656	1.74015	2.02913	2.36627	2.73324	3.30169	3.97577	5.04942	6.55332	9.65706	16.8677	54.0163
0.246094	0.447651	0.676155	0.887304	1.07226	1.25484	1.47656	1.74015	2.02934	2.36943	2.73626	3.30169	3.97577	5.05918	6.5666	9.66021	16.869	54.2418
0.246094	0.447919	0.67647	0.887304	1.07404	1.25484	1.47656	1.74015	2.02934	2.3964	2.73977	3.30169	3.97577	5.06738	6.56739	9.6611	16.8745	54.4318
0.246094	0.450117	0.677775	0.887304	1.07731	1.25484	1.47656	1.74015	2.02934	2.40012	2.74541	3.31085	3.97649	5.06738	6.62171	9.6611	16.8821	54.8767
0.246094	0.451733	0.678026	0.887304	1.07823	1.25484	1.47656	1.74015	2.02934	2.40155	2.75022	3.31085	3.99964	5.06738	6.62263	9.6611	16.9233	54.9583
0.246094	0.453568	0.678857	0.887304	1.08315	1.25484	1.47656	1.74015	2.02934	2.40414	2.75141	3.31085	3.99964	5.06738	6.62628	9.67622	16.9358	55.4602
0.246094	0.453838	0.679978	0.887304	1.08882	1.25484	1.47656	1.74015	2.02934	2.4062	2.75141	3.31085	3.99964	5.06738	6.62628	9.68559	16.9715	55.5289
0.246094	0.454332	0.680403	0.887304	1.08899	1.25484	1.47656	1.74015	2.02934	2.40624	2.75141	3.31085	3.99964	5.07335	6.62628	9.68654	17.0648	55.7281
0.246094	0.455132	0.681177	0.887304	1.08985	1.25484	1.47656	1.74015	2.02934	2.40985	2.75141	3.31085	4.00072	5.07335	6.62628	9.68654	17.0676	55.8801
0.246094	0.455927	0.682248	0.887304	1.09531	1.25484	1.47656	1.74015	2.02934	2.41584	2.75141	3.31085	4.00612	5.07335	6.63289	9.70241	17.1458	55.9288
0.246094	0.455929	0.685069	0.887304	1.09743	1.25484	1.47656	1.74015	2.02934	2.41593	2.75141	3.31085	4.00612	5.07335	6.64453	9.70733	17.1914	56.0759
0.246094	0.456007	0.685441	0.887304	1.09874	1.25484	1.47656	1.74015	2.04065	2.42022	2.75141	3.31085	4.00612	5.07335	6.64909	9.70896	17.1914	56.118
0.246094	0.456435	0.685516	0.887304	1.09909	1.25484	1.47656	1.74015	2.04164	2.42125	2.75141	3.32004	4.03047	5.07335	6.67149	9.73413	17.2002	56.2086
0.246094	0.460137	0.68683	0.887304	1.09993	1.25484	1.47656	1.74015	2.04545	2.42374	2.75141	3.3279	4.03624	5.07335	6.67426	9.7467	17.2195	56.2285
0.246094	0.461584	0.686933	0.887304	1.10056	1.25484	1.47656	1.74015	2.04545	2.42374	2.75141	3.3279	4.03624	5.07335	6.67887	9.75301	17.2792	56.2694
0.246094	0.463226	0.687152	0.887304	1.10056	1.25484	1.47656	1.74015	2.04545	2.42374	2.75141	3.3279	4.03624	5.07335	6.67887	9.78474	17.2792	58.075
0.246094	0.463265	0.688582	0.887304	1.10056	1.25484	1.47656	1.74015	2.04921	2.42374	2.75141	3.3279	4.03624	5.07335	6.68981	9.7975	17.3123	58.1084
0.246094	0.464671	0.690405	0.887304	1.10056	1.25484	1.47656	1.74015	2.05002	2.42374	2.75141	3.3279	4.03673	5.07407	6.69727	9.82842	17.3893	58.7195
0.246094	0.464963	0.690584	0.887304	1.10056	1.25484	1.47656	1.74015	2.0505	2.42374	2.75141	3.33713	4.03791	5.07787	6.70186	9.84375	17.4171	58.8782
0.246094	0.466324	0.691338	0.887304	1.10056	1.25484	1.47656	1.74015	2.06669	2.42374	2.75141	3.34724	4.03791	5.10106	6.71705	9.85605	17.4199	58.9111
0.246094	0.467652	0.691452	0.887304	1.10056	1.25484	1.47656	1.74015	2.06885	2.42374	2.75141	3.34724	4.04249	5.1076	6.73848	9.8714	17.4217	58.9897
0.246094	0.468419	0.692603	0.887304	1.10056	1.25484	1.47656	1.74015	2.07425	2.42374	2.75141	3.34724	4.05868	5.1076	6.7476	9.87837	17.4432	59.278
0.246094	0.468626	0.69401	0.887304	1.10056	1.25484	1.47656	1.74015	2.07639	2.42374	2.75141	3.34724	4.06827	5.11362	6.7575	9.89285	17.4727	59.6847
0.246094	0.468709	0.694152	0.887304	1.10056	1.25484	1.47656	1.74015	2.08372	2.42374	2.75141	3.34724	4.07358	5.11726	6.7575	9.90325	17.4779	60.7313
0.246094	0.470199	0.695552	0.887304	1.10056	1.25484	1.47656	1.74015	2.08436	2.4362	2.75141	3.35271	4.07358	5.12088	6.7575	9.91257	17.5142	60.8031
0.246094	0.470626	0.695793	0.887304	1.10056	1.25484	1.47656	1.74015	2.08669	2.4362	2.75141	3.36357	4.07358	5.12088	6.80662	9.92036	17.5396	61.2101
0.246094	0.471092	0.696058	0.887304	1.10056	1.25484	1.47656	1.74015	2.08817	2.43845	2.75141	3.3738	4.07358	5.12088	6.81113	9.92188	17.5816	61.2689
0.246094	0.471736	0.696058	0.887304	1.10056	1.25484	1.47656	1.74015	2.09121	2.44298	2.75141	3.3738	4.07358	5.12088	6.82439	9.92188	17.6166	61.4372
0.246094	0.471933	0.696058	0.887304	1.10056	1.25484	1.47656	1.74015	2.09611	2.44298	2.75141	3.3738	4.07358	5.13859	6.82467	9.94974	17.6176	61.8768
0.246094	0.472081	0.696058	0.887304	1.10056	1.25484	1.47656	1.74015	2.09732	2.44298	2.75141	3.3738	4.07358	5.13859	6.83769	9.98678	17.7222	61.9282
0.246094	0.47424	0.696058	0.887304	1.10056	1.25484	1.47856	1.74015	2.10053	2.44298	2.75141	3.39002	4.07358	5.16152	6.84211	9.98678	17.7273	62.6477
0.246094	0.474623	0.696058	0.887304	1.10056	1.25484	1.48138	1.74015	2.10263	2.44298	2.75141	3.41884	4.08906	5.16152	6.86064	10.0695	17.7358	63.3685
0.246094	0.478459	0.696058	0.887304	1.10056	1.25484	1.48169	1.74015	2.10263	2.44298	2.75141	3.41884	4.09582	5.16255	6.88654	10.0727	17.8295	64.0771
0.246094	0.47987	0.696058	0.887304	1.10056	1.25484	1.48828	1.74015	2.10263	2.44298	2.75141	3.42769	4.09582	5.16797	6.89062	10.0759	17.8295	64.5892
0.246094	0.481653	0.696058	0.887304	1.10056	1.25484	1.48828	1.74015	2.10263	2.44298	2.75141	3.42769	4.09582	5.17382	6.89062	10.0829	17.8295	65.0251
0.246094	0.48196	0.696058	0.887304	1.10056	1.25484	1.48828	1.74015	2.10263	2.44298	2.75141	3.42769	4.09582	5.17382	6.89502	10.1467	17.8566	66.6255
0.246094	0.481961	0.696058	0.887304	1.10056	1.25484	1.48828	1.74015	2.10263	2.44298	2.75141	3.42769	4.09582	5.17382	6.899	10.1646	17.899	66.6551
0.246094	0.483737	0.696058	0.887304	1.10056	1.25484	1.48828	1.74015	2.10263	2.44303	2.75141	3.42769	4.10591	5.17382	6.90979	10.2272	17.959	66.6878
0.246094	0.484489	0.696058	0.887304	1.10056	1.25484	1.48828	1.74015	2.10406	2.44328	2.75141	3.42769	4.10591	5.17382	6.90979	10.2272	18.0137	66.7363
0.246094	0.484753	0.696058	0.887304	1.10056	1.25484	1.48828	1.74015	2.10475	2.44914	2.75141	3.44531	4.11863	5.17905	6.90979	10.2543	18.0607	67.2156
0.246094	0.484873	0.696058	0.887304	1.10056	1.25484	1.48828	1.7484	2.10475	2.44999	2.75141	3.44531	4.12528	5.19135	6.91608	10.2825	18.0975	67.88
0.246094	0.48647	0.696058	0.887304	1.10056	1.25484	1.48828	1.74948	2.10475	2.4501	2.75141	3.44531	4.12528	5.19135	6.93006	10.2831	18.151	68.3064
0.246094	0.486486	0.696058	0.887304	1.10056	1.25484	1.48828	1.75396	2.10539	2.45554	2.75141	3.44531	4.12528	5.19135	6.93443	10.3197	18.1677	68.5966
0.246094	0.487348	0.696058	0.887304	1.10056	1.25484	1.48828	1.75396	2.11042	2.45559	2.75141	3.44531	4.12528	5.20898	6.94974	10.3251	18.1926	68.8733
0.246094	0.48945	0.696058	0.887304	1.10056	1.25484	1.48828	1.75396	2.11046	2.46072	2.75141	3.44531	4.12528	5.20898	6.94974	10.3476	18.1926	69.7175
0.246094	0.489901	0.696058	0.887304	1.10056	1.25484	1.48828	1.75396	2.11104	2.46094	2.75141	3.44531	4.12832	5.21463	6.96301	10.3498	18.2209	79.7803
0.246094	0.489924	0.696058	0.887304	1.10056	1.25484	1.49251	1.75396	2.11698	2.46094	2.75141	3.44531	4.15228	5.21463	6.96301	10.3726	18.2922	80.2451
0.246094	0.490386	0.696058	0.887304	1.10056	1.25484	1.49693	1.75396	2.11698	2.46094	2.75141	3.44531	4.15802	5.21463	6.96493	10.4089	18.295	80.9663
0.246094	0.491902	0.696058	0.887304	1.10056	1.25484	1.49693	1.75396	2.11698	2.46094	2.75141	3.44531	4.15802	5.21463	6.96493	10.4438	18.3018	81.4604
0.246094	0.492174	0.696058	0.887304	1.10056	1.25484	1.49693	1.75396	2.11698	2.46094	2.75141	3.45409	4.15802	5.21463	6.98506	10.4445	18.337	81.9862
0.246094	0.492188	0.696058	0.887304	1.10056	1.25484	1.49693	1.75396	2.11698	2.46094	2.75141	3.45489	4.15802	5.21463	6.98506	10.4467	18.4374	82.3282
0.246094	0.492188	0.696058	0.887304	1.10056	1.25484	1.49693	1.75396	2.11698	2.46094	2.75141	3.45489	4.15802	5.21489	6.98506	10.4475	18.4455	82.9347
0.246094	0.492188	0.696058	0.887304	1.10056	1.25484	1.49693	1.75396	2.11698	2.46094	2.75141	3.45489	4.16384	5.22044	6.98506	10.4846	18.5013
0.246094	0.492188	0.696058	0.887304	1.10056	1.25484	1.49693	1.75396	2.11698	2.46094	2.75417	3.45489	4.17635	5.23202	6.98947	10.4861	18.5123
0.246094	0.492188	0.696058	0.887304	1.10056	1.25484	1.49693	1.75396	2.11698	2.46094	2.75961	3.45489	4.17777	5.23255	6.99963	10.4965	18.5274
0.246094	0.492188	0.696058	0.887304	1.10056	1.25484	1.49693	1.75396	2.11698	2.46094	2.76076	3.45489	4.18359	5.23258	7.00775	10.5333	18.5903
0.246094	0.492188	0.696058	0.887304	1.10056	1.25484	1.49693	1.75396	2.11698	2.46094	2.76098	3.45489	4.18359	5.24378	7.0327	10.5529	18.6025
0.246094	0.492188	0.696058	0.887304	1.10056	1.25484	1.49693	1.75396	2.11698	2.46094	2.76811	3.45489	4.18359	5.25602	7.04766	10.5617	18.6204
0.246094	0.492188	0.696058	0.887304	1.10056	1.25484	1.49693	1.75396	2.11698	2.46094	2.77325	3.45489	4.18359	5.26088	7.05135	10.5762	18.6545
0.246094	0.492188	0.696058	0.887304	1.10056	1.25484	1.49693	1.75396	2.11698	2.46094	2.77325	3.45489	4.18359	5.26088	7.05518	10.5912	18.6853
0.246094	0.492188	0.696058	0.887304	1.10056	1.25484	1.49693	1.75396	2.11698	2.46094	2.77325	3.47266	4.18359	5.26088	7.10298	10.5935	18.6934
0.246094	0.492188	0.696058	0.887304	1.10175	1.25484	1.49693	1.75396	2.11698	2.46094	2.77325	3.48029	4.19083	5.26088	7.13215	10.6163	18.7419
0.246094	0.492188	0.696058	0.887304	1.1093	1.25484	1.49693	1.75396	2.11698	2.46094	2.77325	3.48029	4.19083	5.26664	7.13672	10.6184	18.7629
0.246094	0.492188	0.696058	0.887304	1.1093	1.25484	1.49693	1.75396	2.11698	2.46094	2.77671	3.48029	4.19083	5.28386	7.14096	10.6202	18.7823
0.246094	0.492188	0.696058	0.887304	1.1093	1.25484	1.49693	1.75396	2.11698	2.46094	2.78423	3.48029	4.20525	5.28386	7.14096	10.6277	18.8226
0.246094	0.492188	0.696058	0.887304	1.1093	1.25484	1.49693	1.75396	2.11698	2.46094	2.78423	3.48029	4.20525	5.28386	7.14185	10.6277	18.8338
0.246094	0.492188	0.696058	0.887304	1.1093	1.25484	1.49693	1.75396	2.11698	2.46094	2.78423	3.48029	4.20525	5.30102	7.14185	10.6482	18.93
0.246094	0.492188	0.696058	0.890288	1.1093	1.25484	1.49883	1.75396	2.11698	2.46094	2.79106	3.48029	4.20525	5.30102	7.14185	10.6535	18.9348
0.246094	0.492188	0.696058	0.890643	1.1093	1.25484	1.50684	1.75396	2.11698	2.46094	2.79885	3.48029	4.20525	5.30102	7.15906	10.6545	18.9556
0.246094	0.492188	0.696058	0.891378	1.1093	1.25484	1.50807	1.75396	2.11822	2.46094	2.7997	3.48029	4.21245	5.30843	7.16636	10.6612	18.9748
0.246094	0.492188	0.696058	0.894083	1.1093	1.25484	1.50881	1.75396	2.11878	2.46094	2.80069	3.48029	4.21245	5.31243	7.1748	10.6846	18.9748
0.246094	0.492188	0.696058	0.894346	1.1093	1.25484	1.50881	1.75396	2.11931	2.46094	2.80342	3.48029	4.21245	5.31243	7.1748	10.7092	18.9812
0.246094	0.492188	0.696058	0.894346	1.1093	1.25484	1.50881	1.75396	2.11931	2.46094	2.8059	3.48029	4.21278	5.31243	7.18745	10.7092	18.9812
0.246094	0.492188	0.696058	0.894346	1.1093	1.25484	1.50881	1.75396	2.11931	2.46094	2.8059	3.48029	4.21445	5.32382	7.19763	10.7092	19.0178
0.246094	0.492188	0.696058	0.894346	1.1093	1.25484	1.50881	1.75396	2.11931	2.46094	2.80633	3.48029	4.2168	5.32579	7.21045	10.7115	19.1084
0.246094	0.492188	0.696058	0.894346	1.1093	1.25484	1.50881	1.75396	2.11931	2.46094	2.80664	3.48029	4.2168	5.3546	7.21045	10.7125	19.1448
0.246094	0.492188	0.696058	0.894346	1.1093	1.25484	1.50881	1.75396	2.11931	2.46094	2.80862	3.48029	4.21784	5.35757	7.22501	10.7213	19.1953
0.246094	0.492188	0.696058	0.894346	1.1093	1.25484	1.50881	1.75396	2.12058	2.46094	2.81123	3.48029	4.22409	5.39577	7.23175	10.7213	19.2032
0.246094	0.492188	0.697372	0.894346	1.1093	1.25484	1.50881	1.75396	2.12876	2.46094	2.81337	3.48029	4.22409	5.39726	7.23175	10.7213	19.2205
0.246094	0.492188	0.697477	0.894346	1.1093	1.25484	1.50881	1.76065	2.133	2.46094	2.81724	3.4815	4.23165	5.39726	7.26146	10.7213	19.2347
0.246094	0.492188	0.698211	0.894346	1.1093	1.25484	1.50881	1.761	2.13378	2.46094	2.81746	3.4815	4.23396	5.39726	7.26249	10.7465	19.252
0.246094	0.492188	0.701583	0.894346	1.1093	1.25484	1.50881	1.76965	2.13378	2.46094	2.8244	3.49607	4.23396	5.39726	7.26706	10.7587	19.2552
0.246094	0.492188	0.701583	0.894346	1.1093	1.25484	1.51436	1.77048	2.13378	2.46094	2.82817	3.49666	4.23396	5.41406	7.29528	10.7693	19.3164
0.246094	0.492188	0.701583	0.894346	1.1093	1.25484	1.52572	1.77437	2.13378	2.46094	2.82817	3.49765	4.23863	5.41406	7.29949	10.7693	19.3477
0.246094	0.492188	0.701583	0.894346	1.1093	1.25484	1.52634	1.77461	2.13378	2.46094	2.82817	3.49765	4.24737	5.41406	7.29949	10.7752	19.3556
0.246094	0.492188	0.701583	0.894346	1.1093	1.25786	1.5442	1.77461	2.13378	2.46094	2.82817	3.49765	4.24824	5.41965	7.30155	10.7853	19.3899
0.246094	0.492188	0.701583	0.894346	1.1093	1.26047	1.54603	1.77461	2.13378	2.46094	2.82817	3.49765	4.2501	5.41965	7.30447	10.7861	19.3962
0.246094	0.492188	0.701583	0.894346	1.1093	1.26079	1.55643	1.77461	2.13378	2.46094	2.82817	3.50338	4.25198	5.41965	7.30447	10.8113	19.4149
0.246094	0.492188	0.701583	0.894346	1.1093	1.26095	1.55643	1.77461	2.13378	2.46094	2.82817	3.51648	4.25988	5.43639	7.30613	10.8533	19.4149
0.246094	0.492188	0.701583	0.894346	1.1093	1.2648	1.55643	1.77461	2.13378	2.46094	2.8319	3.52216	4.26756	5.43639	7.31196	10.8533	19.4227
0.246094	0.492188	0.701583	0.894346	1.1093	1.2648	1.55643	1.77461	2.13378	2.46094	2.83682	3.52353	4.26756	5.44009	7.31689	10.8818	19.4476
0.246094	0.492188	0.701583	0.894346	1.1093	1.2648	1.55643	1.77461	2.13378	2.46094	2.84953	3.52353	4.27484	5.44009	7.31689	10.8913	19.4586
0.246094	0.492188	0.701583	0.894346	1.1093	1.2648	1.55643	1.77461	2.13378	2.46094	2.86838	3.52353	4.28195	5.44394	7.32474	10.8971	19.4601
0.246094	0.492188	0.701583	0.894346	1.1093	1.2648	1.55643	1.77461	2.13823	2.46094	2.86992	3.52353	4.28195	5.44752	7.35118	10.8971	19.4803
0.246094	0.492188	0.701583	0.894346	1.1093	1.2648	1.55643	1.77461	2.14497	2.46094	2.86992	3.52353	4.29059	5.44752	7.36675	10.9284	19.4803
0.246094	0.492188	0.701583	0.894346	1.1093	1.2648	1.55643	1.77529	2.146	2.46094	2.86992	3.52353	4.29784	5.45082	7.37496	10.9311	19.5021
0.246094	0.492188	0.701583	0.894346	1.1093	1.2648	1.55643	1.77593	2.14765	2.46094	2.87304	3.52353	4.29784	5.45145	7.37496	10.9311	19.5176
0.246094	0.492188	0.701583	0.894346	1.1093	1.2648	1.55643	1.78869	2.14966	2.47321	2.87766	3.5453	4.30488	5.46267	7.38281	10.9429	19.6098
0.246094	0.492188	0.701583	0.894346	1.1093	1.2648	1.55643	1.78869	2.15087	2.47321	2.88045	3.54921	4.30488	5.46417	7.38691	10.9506	19.6396
0.246094	0.492188	0.701583	0.894346	1.1093	1.2648	1.55643	1.78869	2.15252	2.47321	2.88045	3.54921	4.31354	5.46417	7.38691	10.9522	19.7013
0.246094	0.492188	0.701583	0.894346	1.10967	1.2648	1.55643	1.78869	2.1543	2.47321	2.88045	3.55149	4.3153	5.46417	7.38691	10.955	19.7259
0.246094	0.492188	0.701583	0.894346	1.10981	1.2648	1.55643	1.78869	2.15859	2.47321	2.88431	3.55149	4.32752	5.46417	7.38691	10.9643	19.7443
0.246094	0.492188	0.701583	0.894346	1.1109	1.2648	1.55643	1.78869	2.16526	2.47321	2.88798	3.55149	4.33195	5.47953	7.39044	10.9716	19.7505
0.246094	0.492188	0.701583	0.894346	1.11377	1.2648	1.55643	1.78869	2.16629	2.47321	2.8927	3.55149	4.33195	5.49206	7.3992	10.9753	19.7888
0.246094	0.492188	0.701583	0.894346	1.11737	1.2648	1.55643	1.78869	2.17223	2.47321	2.8927	3.55149	4.33195	5.49396	7.3992	11.0025	19.8178
0.246094	0.492188	0.701583	0.894346	1.12103	1.2648	1.55643	1.78869	2.17583	2.47321	2.8927	3.55149	4.33195	5.49487	7.41963	11.0095	19.8377
0.246094	0.492188	0.702382	0.894346	1.12898	1.2648	1.55643	1.78869	2.1769	2.47321	2.8927	3.57498	4.33905	5.50282	7.41963	11.0095	19.8483
0.246094	0.492188	0.702621	0.894346	1.13129	1.2648	1.55643	1.78869	2.17707	2.47321	2.89931	3.57738	4.34762	5.50282	7.44001	11.0211	19.8788
0.246094	0.492188	0.703293	0.894346	1.13409	1.2648	1.55643	1.78869	2.17743	2.47321	2.90012	3.58318	4.35384	5.50753	7.44141	11.0448	19.923
0.246094	0.492188	0.703412	0.894346	1.1341	1.2648	1.55643	1.79159	2.18874	2.47321	2.90331	3.58318	4.35384	5.51913	7.44455	11.055	19.9321
0.246094	0.492188	0.703878	0.89604	1.13469	1.2648	1.55643	1.79159	2.19053	2.47321	2.90331	3.58318	4.35763	5.53027	7.44554	11.0605	19.9321
0.246094	0.492188	0.704242	0.896844	1.13473	1.2648	1.55643	1.79159	2.19261	2.47321	2.90331	3.58318	4.36079	5.53027	7.44554	11.0605	19.9351
0.246094	0.492188	0.705152	0.89826	1.13878	1.2648	1.55947	1.79159	2.20113	2.47321	2.90331	3.58318	4.36079	5.53027	7.44554	11.0624	20.0003
0.246094	0.492188	0.706178	0.901339	1.13908	1.2648	1.56007	1.79159	2.20113	2.47321	2.90331	3.58318	4.36079	5.53229	7.44554	11.0742	20.0124
0.246094	0.492188	0.707932	0.901937	1.14011	1.2648	1.56879	1.79159	2.20113	2.47321	2.90331	3.58318	4.36079	5.55142	7.44554	11.077	20.0185
0.246094	0.492188	0.708334	0.903625	1.14351	1.2648	1.56879	1.79159	2.20113	2.47321	2.90331	3.58318	4.36079	5.55213	7.44554	11.077	20.1512
0.246094	0.492188	0.709138	0.905341	1.14381	1.26895	1.56879	1.79159	2.20113	2.47321	2.90367	3.59745	4.36079	5.55213	7.44815	11.0776	20.1572
0.246094	0.492188	0.709153	0.909494	1.14781	1.27503	1.56879	1.79159	2.20113	2.47321	2.90639	3.61162	4.36079	5.55213	7.44815	11.086	20.1812
0.246094	0.492188	0.709788	0.912362	1.15543	1.27692	1.56879	1.79159	2.20113	2.47321	2.91191	3.61162	4.36079	5.56064	7.44815	11.094	20.1887
0.246094	0.492188	0.710017	0.918989	1.15557	1.27981	1.56879	1.79159	2.20113	2.47321	2.92899	3.61676	4.36079	5.57416	7.45593	11.1171	20.2172
0.246094	0.492188	0.71078	0.920054	1.15895	1.28082	1.56879	1.79159	2.20113	2.47321	2.93234	3.61866	4.36079	5.57933	7.45792	11.1179	20.3604
0.246094	0.492188	0.716223	0.924037	1.16032	1.28881	1.57216	1.79159	2.20182	2.48047	2.93615	3.63353	4.36079	5.57933	7.45792	11.1288	20.3897
0.246094	0.492188	0.716383	0.925852	1.16211	1.29421	1.57515	1.79159	2.2056	2.48047	2.93746	3.63353	4.36079	5.59619	7.46205	11.1288	20.4791
0.246094	0.492188	0.717297	0.927313	1.16297	1.29436	1.57577	1.79159	2.20748	2.48047	2.95312	3.63353	4.36079	5.60395	7.46205	11.1288	20.5735
0.246094	0.492188	0.717529	0.930099	1.16711	1.29452	1.57577	1.79159	2.21099	2.48047	2.95312	3.63353	4.36465	5.6118	7.46425	11.1288	20.6044
0.246094	0.492188	0.718072	0.930184	1.16722	1.29491	1.57577	1.79159	2.21105	2.48047	2.95312	3.63353	4.3703	5.6118	7.4725	11.1424	20.6264
0.246094	0.492188	0.719978	0.937376	1.16738	1.29571	1.57577	1.79159	2.21484	2.48047	2.95312	3.65001	4.38157	5.6118	7.47298	11.1686	20.6953
0.246094	0.492188	0.723683	0.938567	1.16853	1.29624	1.57577	1.79159	2.21484	2.48047	2.95312	3.65845	4.38157	5.61719	7.48465	11.1693	20.7012
0.246094	0.492188	0.72408	0.939308	1.17022	1.30013	1.57577	1.79159	2.21484	2.48172	2.95312	3.65845	4.38157	5.61719	7.48465	11.1858	20.7012
0.246094	0.492188	0.724407	0.939671	1.17092	1.30235	1.57577	1.80581	2.21484	2.48326	2.95312	3.65845	4.38157	5.61719	7.48465	11.1924	20.7216
0.246094	0.492188	0.724473	0.940656	1.17149	1.30437	1.57577	1.80581	2.21484	2.48665	2.95312	3.65845	4.38157	5.62258	7.48729	11.1924	20.7654
0.246094	0.492188	0.72751	0.940921	1.17285	1.30549	1.57577	1.80581	2.21484	2.49001	2.95312	3.65845	4.3954	5.62258	7.50081	11.2171	20.8018
0.246094	0.492188	0.72824	0.942424	1.17567	1.30827	1.57577	1.81078	2.21484	2.49284	2.95312	3.65845	4.40226	5.62258	7.50726	11.2171	20.802
0.246094	0.492188	0.728826	0.943434	1.17572	1.31042	1.57577	1.81618	2.21484	2.49284	2.95312	3.65845	4.40226	5.62258	7.51292	11.2308	20.8178
0.246094	0.492188	0.728956	0.943454	1.17655	1.31133	1.57577	1.82267	2.21484	2.49424	2.95312	3.65845	4.40498	5.62258	7.52124	11.2452	20.8846
0.246094	0.492188	0.729546	0.943458	1.17703	1.31171	1.57577	1.82278	2.21484	2.49762	2.9582	3.65845	4.4063	5.65232	7.52902	11.2452	20.8933
0.246094	0.492188	0.730214	0.945253	1.17989	1.31329	1.57577	1.82564	2.21484	2.49906	2.96336	3.65845	4.40747	5.65755	7.55075	11.2472	20.918
0.246094	0.492188	0.731938	0.945658	1.18018	1.32526	1.57577	1.8362	2.21484	2.49971	2.96336	3.65845	4.41075	5.66016	7.5664	11.2475	21.0104
0.246094	0.492188	0.731975	0.946051	1.18374	1.32526	1.57577	1.83952	2.21484	2.50581	2.96336	3.65845	4.42969	5.66178	7.58113	11.3143	21.0263
0.246094	0.492188	0.734484	0.947699	1.1849	1.32526	1.57577	1.84125	2.21484	2.50967	2.96336	3.65845	4.43652	5.6655	7.58878	11.3444	21.0565
0.246094	0.492188	0.7349	0.949998	1.18504	1.32526	1.57577	1.8567	2.21484	2.50967	2.96336	3.65845	4.43652	5.6655	7.59709	11.363	21.1311
0.246094	0.492188	0.735146	0.950438	1.18817	1.32526	1.57577	1.85825	2.21484	2.50967	2.96336	3.65845	4.43652	5.66721	7.60107	11.387	21.1998
0.246094	0.492188	0.737913	0.950551	1.19043	1.32526	1.57577	1.85896	2.21484	2.50967	2.96336	3.65845	4.43652	5.6725	7.60107	11.4021	21.2497
0.246094	0.492188	0.737919	0.95164	1.19184	1.32526	1.57577	1.85967	2.21484	2.50967	2.96336	3.65845	4.43652	5.68152	7.60107	11.4129	21.2853
0.246094	0.492188	0.7381	0.95249	1.19997	1.32526	1.57577	1.86099	2.21484	2.50967	2.96336	3.65845	4.43652	5.68152	7.60107	11.4129	21.3081
0.246094	0.492188	0.738281	0.952877	1.20369	1.32526	1.57577	1.86306	2.21484	2.50967	2.96336	3.65845	4.43652	5.70119	7.60107	11.4238	21.461
0.246094	0.492188	0.738281	0.954157	1.20539	1.32526	1.57577	1.86597	2.21484	2.50967	2.96336	3.65845	4.43652	5.70508	7.60107	11.4263	21.461
0.246094	0.492188	0.738281	0.954965	1.2063	1.32526	1.57577	1.86614	2.21484	2.50967	2.96336	3.66237	4.43652	5.7081	7.609	11.4401	21.5272
0.246094	0.492188	0.738281	0.954965	1.2082	1.32526	1.57577	1.86803	2.21484	2.50967	2.96536	3.66237	4.43652	5.7081	7.60902	11.4431	21.5744
0.246094	0.492188	0.738281	0.957078	1.20842	1.32526	1.57577	1.86839	2.21484	2.50967	2.97356	3.66237	4.43652	5.71047	7.62891	11.4438	21.6227
0.246094	0.492188	0.738281	0.958744	1.21014	1.32526	1.57577	1.87051	2.2186	2.51685	2.97356	3.66237	4.43652	5.71047	7.64129	11.4563	21.6479
0.246094	0.492188	0.738281	0.959864	1.2128	1.32526	1.57577	1.87419	2.2186	2.52086	2.97356	3.66237	4.43652	5.71063	7.65738	11.4908	21.6688
0.246094	0.492188	0.738281	0.966132	1.21638	1.32526	1.57577	1.87419	2.2186	2.52435	2.97356	3.67348	4.43652	5.72399	7.6614	11.4908	21.7149
0.246094	0.492188	0.738281	0.967509	1.21684	1.32526	1.57577	1.87419	2.2186	2.52959	2.97356	3.68334	4.43652	5.73314	7.66455	11.4992	21.7956
0.246094	0.492188	0.738281	0.96802	1.21888	1.32526	1.57577	1.87419	2.2186	2.53369	2.97356	3.68748	4.43652	5.73369	7.66455	11.5814	21.9079
0.246094	0.492188	0.738281	0.972957	1.2202	1.32526	1.57577	1.87419	2.2186	2.53369	2.97356	3.68748	4.43652	5.73498	7.69215	11.5814	21.9079
0.246094	0.492188	0.738281	0.974951	1.22102	1.32526	1.57577	1.87419	2.2186	2.53369	2.97356	3.68748	4.43652	5.73984	7.70145	11.5868	21.9148
0.246094	0.492188	0.738281	0.976146	1.22201	1.32526	1.57577	1.87419	2.22006	2.53369	2.97356	3.68748	4.43652	5.74512	7.72358	11.5974	21.9286
0.246094	0.492188	0.738281	0.977386	1.22478	1.32526	1.57577	1.87419	2.22016	2.53369	2.97356	3.69141	4.4372	5.74512	7.72365	11.6082	21.9369
0.246094	0.492188	0.738281	0.978116	1.22949	1.32526	1.57577	1.87419	2.22847	2.53369	2.97356	3.69141	4.44884	5.74512	7.77049	11.6082	22.1224
0.246094	0.492188	0.738281	0.978179	1.23047	1.32526	1.57577	1.87687	2.22847	2.53369	2.97356	3.69141	4.45124	5.74512	7.78217	11.6254	22.1607
0.246094	0.492188	0.738281	0.978205	1.23047	1.32526	1.57577	1.87718	2.22847	2.53369	2.97656	3.69141	4.45695	5.75108	7.78217	11.6603	22.2151
0.246094	0.492188	0.738281	0.980642	1.23047	1.32526	1.57577	1.8803	2.22847	2.53369	2.98688	3.69141	4.47173	5.76091	7.78488	11.6733	22.2317
0.246094	0.492188	0.738281	0.98152	1.23047	1.32526	1.57577	1.88047	2.22847	2.53369	2.98688	3.69141	4.47173	5.76616	7.78488	11.6898	22.2483
0.246094	0.492188	0.738281	0.981879	1.23047	1.32526	1.57577	1.88263	2.22847	2.53369	2.99365	3.69141	4.47173	5.76616	7.78488	11.6992	22.2847
0.246094	0.492188	0.738281	0.982694	1.23047	1.32526	1.57577	1.88504	2.22847	2.53369	2.99386	3.69141	4.47173	5.76616	7.78488	11.7123	22.3146
0.246094	0.492188	0.738281	0.983128	1.23047	1.32526	1.57577	1.88684	2.22847	2.53369	2.99386	3.69141	4.47173	5.76616	7.78883	11.7319	22.3173
0.246094	0.492188	0.738281	0.984375	1.23047	1.32526	1.57577	1.88907	2.22847	2.53369	2.99716	3.69141	4.47173	5.7854	7.81355	11.7319	22.4688
0.246094	0.492188	0.738281	0.984375	1.23047	1.32526	1.57577	1.88907	2.22847	2.53369	2.99716	3.69141	4.47502	5.79071	7.81711	11.7405	22.6219
0.246094	0.492188	0.738281	0.984375	1.23047	1.32526	1.57577	1.88907	2.22847	2.53369	2.99716	3.69282	4.4902	5.7923	7.81711	11.7528	22.8337
0.246094	0.492188	0.738281	0.984375	1.23047	1.32526	1.57577	1.88907	2.22847	2.53369	2.99716	3.6996	4.49079	5.79236	7.81711	11.756	22.8688
0.246094	0.492188	0.738281	0.984375	1.23047	1.32526	1.57577	1.89441	2.22847	2.53369	2.99716	3.6996	4.49079	5.79236	7.82098	11.8151	22.9712
0.246094	0.492188	0.738281	0.984375	1.23047	1.32526	1.57577	1.89534	2.22847	2.53369	2.99716	3.6996	4.49079	5.79236	7.82098	11.833	22.9805
0.246094	0.492188	0.738281	0.984375	1.23047	1.32526	1.57577	1.89576	2.2285	2.53369	2.99716	3.7207	4.50047	5.80663	7.85189	11.8467	23.0186
0.246094	0.492188	0.738281	0.984375	1.23047	1.32526	1.57577	1.90102	2.22965	2.53369	2.99716	3.72407	4.50795	5.80802	7.87915	11.8593	23.0239
0.246094	0.492188	0.738281	0.984375	1.23047	1.32526	1.57577	1.90568	2.23242	2.53369	2.99716	3.72407	4.51697	5.80802	7.88305	11.87	23.2347
0.246094	0.492188	0.738281	0.984375	1.23047	1.32526	1.57577	1.9093	2.23242	2.536	2.99716	3.72407	4.51768	5.83403	7.93628	11.8764	23.3828
0.246094	0.492188	0.738281	0.984375	1.23047	1.32526	1.57577	1.91115	2.23242	2.53745	2.99716	3.72407	4.51768	5.83528	7.93693	11.9034	23.41
0.246094	0.492188	0.738281	0.984375	1.23047	1.32526	1.57577	1.91431	2.23242	2.53938	2.99716	3.73815	4.51768	5.84958	7.94391	11.9044	23.4191
0.246094	0.492188	0.738281	0.984375	1.23047	1.32526	1.57577	1.91643	2.2337	2.54214	3.0029	3.74839	4.51768	5.84958	7.94814	11.907	23.4513
0.246094	0.492188	0.738281	0.984375	1.23047	1.32526	1.57577	1.91789	2.23523	2.54254	3.00396	3.74839	4.52438	5.84958	7.96166	11.9192	23.4617
0.246094	0.492188	0.738281	0.984375	1.23047	1.32526	1.57577	1.92205	2.23634	2.54265	3.00396	3.74839	4.53774	5.87025	7.98773	11.9374	23.6685
0.246094	0.492188	0.738281	0.984375	1.23047	1.32526	1.57577	1.92205	2.23909	2.54674	3.00396	3.74839	4.53774	5.8906	7.99927	11.9732	23.7069
0.246094	0.492188	0.738281	0.984375	1.23047	1.32526	1.57577	1.92205	2.24141	2.55221	3.00396	3.75646	4.53774	5.90643	8.0148	12.0068	23.8138
0.246094	0.492188	0.738281	0.984375	1.23047	1.32526	1.57577	1.92205	2.24159	2.5538	3.00396	3.76451	4.54353	5.91137	8.03488	12.0424	23.8139
0.246094	0.492188	0.738281	0.984375	1.23047	1.32526	1.57577	1.92205	2.24398	2.5538	3.00396	3.76451	4.54547	5.91137	8.04617	12.0552	23.9433
0.246094	0.492188	0.738281	0.984375	1.23047	1.32526	1.57577	1.92205	2.24616	2.5538	3.00396	3.76451	4.55354	5.9165	8.06121	12.0581	23.9773
0.246094	0.492188	0.738281	0.984375	1.23047	1.32526	1.57577	1.92205	2.24616	2.5538	3.00396	3.76451	4.56029	5.92672	8.0659	12.0686	24.1046
0.246094	0.492188	0.738281	0.984375	1.23047	1.32526	1.57577	1.92205	2.24616	2.55596	3.00396	3.76451	4.57376	5.92672	8.09495	12.0812	24.1322
0.246094	0.492188	0.738281	0.984375	1.23047	1.32526	1.58258	1.92205	2.24616	2.55907	3.00396	3.76451	4.57544	5.93148	8.09865	12.0876	24.2387
0.246094	0.492188	0.738281	0.984375	1.23047	1.32526	1.58682	1.92205	2.25863	2.56369	3.00396	3.77704	4.57761	5.94712	8.09865	12.132	24.2424
0.246094	0.492188	0.738281	0.984375	1.23047	1.32526	1.58827	1.92205	2.25919	2.56919	3.00536	3.77814	4.57761	5.95221	8.11003	12.134	24.2686
0.246094	0.492188	0.738281	0.984375	1.23047	1.32526	1.58827	1.92205	2.26887	2.56929	3.01407	3.77867	4.58624	5.95221	8.12109	12.1412	24.3048
0.246094	0.492188	0.738281	0.984375	1.23047	1.32526	1.58827	1.92205	2.26887	2.56929	3.01567	3.79439	4.59523	5.95221	8.15087	12.1487	24.4774
0.246094	0.492188	0.738281	0.984375	1.23047	1.32526	1.58827	1.92205	2.26887	2.56929	3.01762	3.79439	4.59741	5.95221	8.16352	12.1487	24.5617
0.246094	0.492188	0.738281	0.984375	1.23047	1.32526	1.58827	1.92205	2.26887	2.56929	3.02905	3.80344	4.59741	5.95221	8.18054	12.1644	24.6567
0.246094	0.492188	0.738281	0.984375	1.23047	1.32526	1.58827	1.92205	2.26887	2.56929	3.03753	3.81401	4.59741	5.95221	8.19163	12.176	24.7137
0.246094	0.492188	0.738281	0.984375	1.23047	1.32526	1.58827	1.92205	2.26887	2.56929	3.04401	3.8204	4.59741	5.95312	8.21181	12.2009	24.7364
0.246094	0.492188	0.738281	0.984375	1.23047	1.32526	1.58827	1.92205	2.26887	2.56929	3.04401	3.8204	4.59741	5.9573	8.21691	12.2526	24.7493
0.246094	0.492188	0.738281	0.984375	1.23047	1.32526	1.58827	1.92205	2.26887	2.56929	3.04401	3.8204	4.59741	5.9573	8.24546	12.2551	24.7575
0.246094	0.492188	0.738281	0.984375	1.23047	1.32526	1.58827	1.92205	2.26887	2.56929	3.04401	3.8204	4.59741	5.98772	8.25665	12.2603	24.8753
0.246094	0.492188	0.738281	0.984375	1.23047	1.32526	1.58827	1.92205	2.26887	2.56929	3.04511	3.8204	4.59741	5.98772	8.26814	12.3152	24.9187
0.246094	0.492188	0.738281	0.984375	1.23047	1.32526	1.58827	1.92205	2.26887	2.56929	3.05628	3.8204	4.59741	5.98772	8.27256	12.3661	25.0269
0.246094	0.492188	0.738281	0.984375	1.23047	1.32526	1.58827	1.92205	2.26887	2.56929	3.06817	3.8204	4.59741	5.98772	8.27256	12.3828	25.1016
0.246094	0.492188	0.738281	0.984375	1.23047	1.32526	1.58827	1.92205	2.26887	2.56929	3.06817	3.8204	4.59741	5.99277	8.30179	12.3856	25.1209
0.246094	0.492188	0.738281	0.984375	1.23047	1.32526	1.58827	1.92205	2.26887	2.56929	3.07558	3.82832	4.61299	5.99277	8.33821	12.4149	25.1606
0.246094	0.492188	0.738281	0.984375	1.23047	1.32526	1.58827	1.92205	2.26887	2.57002	3.08355	3.82832	4.61394	5.99277	8.36268	12.4246	25.185
0.246094	0.492188	0.738281	0.984375	1.23047	1.32526	1.58827	1.92205	2.26887	2.57599	3.08355	3.82832	4.62368	5.99277	8.36768	12.4952	25.1859
0.246094	0.492188	0.738281	0.984375	1.23047	1.32526	1.58827	1.92205	2.28425	2.57689	3.08355	3.84411	4.62368	5.99277	8.36768	12.5135	25.2033
0.246094	0.492188	0.738281	0.984375	1.23047	1.32526	1.58827	1.92205	2.28425	2.57777	3.08355	3.84411	4.62368	5.99381	8.38165	12.529	25.2039
0.246094	0.492188	0.738281	0.984375	1.23047	1.32526	1.58827	1.92205	2.28688	2.57811	3.10802	3.84411	4.62368	5.99945	8.38165	12.5339	25.2519
0.246094	0.492188	0.738281	0.984375	1.23047	1.32526	1.58827	1.92301	2.28688	2.58843	3.11287	3.84799	4.6339	6.00508	8.4105	12.5484	25.2555
0.246094	0.492188	0.738281	0.984375	1.23047	1.32526	1.58827	1.92323	2.28688	2.58969	3.11287	3.84811	4.6339	6.00791	8.4105	12.5508	25.2723
0.246094	0.492188	0.738281	0.984375	1.23047	1.32526	1.58827	1.92968	2.28688	2.58969	3.11287	3.8501	4.64329	6.01026	8.41378	12.5604	25.3369
0.246094	0.492188	0.738281	0.984375	1.23047	1.32526	1.58827	1.93234	2.28688	2.58969	3.11287	3.85039	4.64329	6.03306	8.43359	12.5773	25.3369
0.246094	0.492188	0.738281	0.984375	1.23047	1.32557	1.58827	1.93558	2.28688	2.60722	3.12375	3.85072	4.64329	6.03306	8.46636	12.611	25.3775
0.246094	0.492188	0.738281	0.984375	1.23047	1.32684	1.58827	1.93731	2.28688	2.60759	3.12661	3.85072	4.64329	6.03306	8.46636	12.6504	25.4085
0.246094	0.492188	0.738281	0.984375	1.23047	1.33577	1.58827	1.93731	2.28757	2.61072	3.13226	3.85198	4.64525	6.03414	8.48451	12.6601	25.4148
0.246094	0.492188	0.738281	0.984375	1.23047	1.33577	1.58827	1.93731	2.29094	2.61595	3.13757	3.87462	4.67578	6.04683	8.50684	12.6601	25.4813
0.246094	0.492188	0.738281	0.984375	1.23047	1.33577	1.58827	1.93731	2.29552	2.61601	3.13757	3.8757	4.67578	6.05311	8.5243	12.7138	25.5247
0.246094	0.492188	0.738281	0.984375	1.23047	1.33577	1.58827	1.93731	2.29609	2.61601	3.13757	3.88255	4.68014	6.07807	8.53512	12.7159	25.6694
0.246094	0.492188	0.738281	0.984375	1.23047	1.33577	1.58827	1.93731	2.29805	2.61601	3.15154	3.88255	4.68014	6.08094	8.53512	12.7256	25.7118
0.246094	0.492188	0.738281	0.984375	1.23047	1.33577	1.58827	1.93731	2.30125	2.61601	3.15154	3.88255	4.68014	6.08094	8.58339	12.7328	25.7318
0.246094	0.492188	0.738281	0.984375	1.23047	1.33577	1.58827	1.93731	2.31357	2.61601	3.15154	3.88733	4.68014	6.09299	8.59322	12.7898	25.7471
0.246094	0.492188	0.738281	0.984375	1.23047	1.33577	1.58896	1.93731	2.31731	2.61601	3.15154	3.89108	4.70161	6.10157	8.62263	12.8347	25.7542
0.246094	0.492188	0.738281	0.984375	1.23047	1.33577	1.59438	1.93731	2.32164	2.61601	3.15154	3.89108	4.70636	6.11023	8.65184	12.8347	25.936
0.246094	0.492188	0.738281	0.984375	1.23047	1.33577	1.59944	1.93731	2.32164	2.61704	3.15154	3.89108	4.70636	6.11284	8.6639	12.8394	25.9439
0.246094	0.492188	0.738281	0.984375	1.23047	1.33577	1.59949	1.93731	2.32164	2.61858	3.15154	3.89108	4.71289	6.12476	8.66935	12.8465	25.9568
0.246094	0.492188	0.738281	0.984375	1.23047	1.33577	1.60562	1.93731	2.32164	2.61865	3.15154	3.89108	4.72332	6.12631	8.67735	12.8559	25.9976
0.246094	0.492188	0.738281	0.984375	1.23047	1.33577	1.60596	1.93731	2.32164	2.62495	3.15703	3.89108	4.72731	6.13055	8.6781	12.8559	26.0069
0.246094	0.492188	0.738281	0.984375	1.23047	1.33577	1.61045	1.93731	2.32164	2.62742	3.17246	3.89108	4.72731	6.13343	8.69725	12.8818	26.0092
0.246094	0.492188	0.738281	0.984375	1.23047	1.33577	1.61235	1.93731	2.32164	2.62825	3.17655	3.89108	4.73371	6.15165	8.69725	12.9008	26.0836
0.246094	0.492188	0.738281	0.984375	1.23047	1.33577	1.61491	1.93731	2.32164	2.63283	3.19922	3.89108	4.73371	6.15234	8.70073	12.9123	26.2062
0.246094	0.492188	0.738281	0.984375	1.23047	1.33577	1.61538	1.93731	2.32164	2.63677	3.19922	3.89108	4.73371	6.15234	8.70073	12.9193	26.2353
0.246094	0.492188	0.738281	0.984375	1.23047	1.33577	1.61662	1.93731	2.32164	2.63677	3.19922	3.89108	4.73371	6.15234	8.72853	13.0087	26.3228
0.246094	0.492188	0.738281	0.984375	1.23047	1.33577	1.61795	1.93731	2.32164	2.63968	3.19922	3.89108	4.73893	6.15234	8.73815	13.0178	26.3263
0.246094	0.492188	0.738281	0.984375	1.23047	1.33577	1.6213	1.93731	2.32164	2.64378	3.19922	3.89108	4.75286	6.15682	8.73815	13.0453	26.3458
0.246094	0.492188	0.738281	0.984375	1.23047	1.33577	1.62332	1.93731	2.32164	2.64914	3.19922	3.89108	4.75286	6.16709	8.73815	13.0511	26.3608
0.246094	0.492188	0.738281	0.984375	1.23047	1.33577	1.62554	1.93731	2.32164	2.65051	3.19922	3.89108	4.75286	6.172	8.73893	13.0694	26.378
0.246094	0.492188	0.738281	0.984375	1.23047	1.33577	1.6263	1.93731	2.32164	2.65051	3.19922	3.89108	4.75286	6.172	8.76978	13.0801	26.5908
0.246094	0.492188	0.738281	0.984375	1.23047	1.33577	1.63209	1.93731	2.32164	2.65051	3.19922	3.89108	4.75286	6.172	8.76978	13.1009	26.6168
0.246094	0.492188	0.738281	0.984375	1.23047	1.33577	1.63502	1.93762	2.32164	2.65051	3.19922	3.89108	4.76482	6.172	8.77908	13.1633	26.6168
0.246094	0.492188	0.738281	0.984375	1.23047	1.33577	1.6426	1.93774	2.32164	2.65051	3.19922	3.89108	4.76482	6.172	8.78967	13.1907	26.6384
0.246094	0.492188	0.738281	0.984375	1.23047	1.33577	1.64346	1.94373	2.32164	2.65051	3.19922	3.89108	4.77032	6.19303	8.7978	13.2049	26.6521
0.246094	0.492188	0.738281	0.984375	1.23047	1.33577	1.6486	1.95139	2.32164	2.65051	3.19922	3.89108	4.77128	6.20613	8.7978	13.2072	26.7431
0.246094	0.492188	0.738281	0.984375	1.23047	1.33577	1.64882	1.95702	2.32164	2.65051	3.19922	3.89108	4.77828	6.21113	8.80452	13.2118	26.7621
0.246094	0.492188	0.738281	0.984375	1.23047	1.33577	1.649	1.9588	2.32164	2.65051	3.19922	3.89108	4.784	6.21604	8.80828	13.2663	26.8016
0.246094	0.492188	0.738281	0.984375	1.23047	1.3419	1.64966	1.95946	2.32164	2.65051	3.19922	3.89108	4.8162	6.22098	8.80994	13.2676	26.8434
0.246094	0.492188	0.738281	0.984375	1.23047	1.3503	1.65085	1.96012	2.32164	2.65051	3.19922	3.89108	4.83498	6.22098	8.82135	13.2982	26.8919
0.246094	0.492188	0.738281	0.984375	1.23047	1.35091	1.65085	1.96035	2.32164	2.65051	3.19922	3.89108	4.83498	6.24566	8.8217	13.3255	26.9185
0.246094	0.492188	0.738281	0.984375	1.23047	1.35247	1.65085	1.96371	2.32164	2.65051	3.19922	3.90223	4.83498	6.25489	8.82404	13.3865	26.9551
0.246094	0.492188	0.738281	0.984375	1.23047	1.3586	1.65085	1.96875	2.32164	2.65051	3.20867	3.90711	4.84748	6.27418	8.85203	13.3984	26.9694
0.246094	0.492188	0.738281	0.984375	1.23047	1.36268	1.65085	1.96875	2.32164	2.65051	3.20867	3.9111	4.84748	6.27418	8.85357	13.4003	26.9807
0.246094	0.492188	0.738281	0.984375	1.23047	1.36374	1.65085	1.96875	2.32164	2.65051	3.20867	3.92197	4.84748	6.27418	8.85357	13.4037	26.9807
0.246094	0.492188	0.738281	0.984375	1.23047	1.36572	1.65085	1.96875	2.32164	2.66191	3.20867	3.92197	4.85373	6.27418	8.87304	13.4093	27.03
0.246094	0.492188	0.738281	0.984375	1.23047	1.36836	1.65085	1.96875	2.32164	2.66191	3.20867	3.92197	4.85373	6.27418	8.87304	13.4152	27.078
0.246094	0.492188	0.738281	0.984375	1.23047	1.37459	1.65085	1.96875	2.32164	2.66191	3.20867	3.92197	4.85373	6.28005	8.87645	13.4431	27.0837
0.246094	0.492188	0.738281	0.984375	1.23047	1.38125	1.65085	1.96875	2.32164	2.66191	3.20867	3.93031	4.87335	6.28865	8.88133	13.4476	27.1741
0.246094	0.492188	0.738281	0.984375	1.23047	1.39212	1.65085	1.96875	2.32164	2.66684	3.22461	3.9375	4.87911	6.28865	8.89171	13.4984	27.2376
0.246094	0.492188	0.738281	0.984375	1.23047	1.39212	1.65085	1.96875	2.32164	2.66881	3.22461	3.95232	4.88069	6.30308	8.89349	13.5717	27.2487
0.246094	0.492188	0.738281	0.984375	1.23047	1.39212	1.65085	1.96875	2.32164	2.67155	3.22461	3.95405	4.88151	6.30308	8.89405	13.572	27.302
0.246094	0.492188	0.738281	0.984375	1.23047	1.39212	1.65085	1.96875	2.32164	2.67155	3.22461	3.96814	4.88482	6.30308	8.90554	13.5776	27.3175
0.246094	0.492188	0.738281	0.984375	1.23047	1.39212	1.65085	1.96875	2.32452	2.67155	3.22461	3.96814	4.89225	6.31153	8.91667	13.5793	27.395
0.246094	0.492188	0.738281	0.984375	1.23047	1.39212	1.65085	1.96875	2.32454	2.67155	3.22461	3.96814	4.90338	6.32125	8.91729	13.591	27.395
0.246094	0.492188	0.738281	0.984375	1.23047	1.39212	1.65085	1.96875	2.32517	2.67155	3.22461	3.96814	4.90338	6.32398	8.92069	13.6132	27.395
0.246094	0.492188	0.738281	0.984375	1.23047	1.39212	1.65085	1.96875	2.32775	2.67155	3.22461	3.96814	4.90338	6.32705	8.93858	13.622	27.5141
0.246094	0.492188	0.738281	0.984375	1.23047	1.39212	1.65085	1.96875	2.33414	2.67155	3.22461	3.96814	4.90338	6.33856	8.94346	13.6254	27.5511
0.246094	0.492188	0.738281	0.984375	1.23047	1.39212	1.65085	1.96875	2.33465	2.67155	3.22461	3.96814	4.90338	6.35094	8.94346	13.6776	27.5511
0.246094	0.492188	0.738281	0.984375	1.23047	1.39212	1.65085	1.96875	2.33465	2.67155	3.23414	3.96875	4.90338	6.35094	8.94346	13.6911	27.5636
0.246094	0.492188	0.738281	0.984375	1.23047	1.39212	1.65085	1.96875	2.33465	2.67155	3.23414	3.97577	4.9069	6.35094	8.94346	13.6988	27.6391
0.246094	0.492188	0.738281	0.984375	1.23047	1.39212	1.65396	1.96875	2.33465	2.67155	3.23414	3.97577	4.91479	6.36821	8.95795	13.7325	27.6513
0.246094	0.492188	0.738281	0.984375	1.23047	1.39212	1.65477	1.96875	2.33465	2.67155	3.23686	3.97577	4.92188	6.37727	8.95795	13.7681	27.6721
0.246094	0.492188	0.738281	0.984375	1.23047	1.39212	1.65867	1.96875	2.33465	2.67155	3.23686	3.97577	4.92188	6.37727	8.96407	13.801	27.826
0.246094	0.492188	0.738281	0.984375	1.23047	1.39212	1.66395	1.97065	2.33465	2.67665	3.23686	3.97577	4.92802	6.39844	8.96407	13.8196	27.8641
0.246094	0.492188	0.738281	0.984375	1.23047	1.39212	1.66395	1.97233	2.33465	2.68304	3.23686	3.97577	4.94642	6.39844	8.96792	13.8361	27.8652
0.246094	0.492188	0.738281	0.984375	1.23047	1.39212	1.66395	1.97387	2.33465	2.68304	3.23686	3.97649	4.95254	6.40134	8.97471	13.8418	27.9314
0.246094	0.492188	0.738281	0.984375	1.23047	1.39212	1.66395	1.97621	2.33465	2.68304	3.23686	3.98275	4.96713	6.40317	8.98151	13.8536	27.939
0.246094	0.492188	0.738281	0.984375	1.23047	1.39212	1.66395	1.97691	2.33465	2.68534	3.23686	3.99887	4.97694	6.41734	8.99787	13.8689	27.9693
0.246094	0.492188	0.738281	0.984375	1.23047	1.39212	1.66395	1.97881	2.33465	2.68766	3.23686	3.99964	4.97694	6.41734	9.00023	13.8689	28.0266
0.246094	0.492188	0.738281	0.984375	1.23047	1.39212	1.66451	1.9793	2.33465	2.69053	3.24737	3.99964	4.97694	6.44282	9.00728	13.8773	28.083
0.246094	0.492188	0.738281	0.984375	1.23047	1.39212	1.66487	1.98153	2.33465	2.69179	3.2483	3.99964	4.98302	6.44922	9.0154	13.8928	28.0989
0.246094	0.492188	0.738281	0.984375	1.23047	1.39212	1.66637	1.98339	2.33465	2.6949	3.26255	3.99964	4.98302	6.44922	9.01882	13.9906	28.1237
0.246094	0.492188	0.738281	0.984375	1.23047	1.39212	1.66949	1.98407	2.34007	2.70226	3.26255	4.00612	4.98302	6.45334	9.02904	14.0053	28.1377
0.246094	0.492188	0.738281	0.984375	1.23047	1.39572	1.67259	1.98407	2.34007	2.70602	3.27044	4.00612	4.98302	6.45399	9.02904	14.0295	28.2382
0.246094	0.492188	0.738281	0.984375	1.23047	1.39998	1.67441	1.98407	2.34007	2.70703	3.27092	4.00612	4.98302	6.45399	9.03634	14.0295	28.2622
0.246094	0.492188	0.738281	0.984375	1.23047	1.40317	1.67757	1.98407	2.34007	2.70703	3.2833	4.00732	4.98302	6.4617	9.04323	14.0295	28.2879
0.246094	0.492188	0.738281	0.984375	1.23047	1.40317	1.67929	1.98407	2.34007	2.70703	3.2833	4.02315	5.01434	6.4626	9.05286	14.1027	28.2879
0.246094	0.492188	0.738281	0.984375	1.23047	1.40317	1.68084	1.98407	2.34007	2.70703	3.2833	4.03624	5.01644	6.47372	9.05286	14.1408	28.4076
0.246094	0.492188	0.738281	0.984375	1.23047	1.40317	1.68333	1.98407	2.3405	2.70703	3.2833	4.03624	5.01935	6.48989	9.05286	14.1408	28.4363
0.246094	0.492188	0.738281	0.984375	1.23047	1.40317	1.689	1.98407	2.34191	2.70703	3.2833	4.03624	5.02257	6.49311	9.05318	14.1477	28.4865
0.246094	0.492188	0.738281	0.984375	1.23047	1.40317	1.69441	1.98407	2.34338	2.70703	3.2833	4.03624	5.04942	6.49706	9.06124	14.1969	28.5065
0.246094	0.492188	0.738281	0.984375	1.23047	1.40317	1.70082	1.98407	2.34593	2.70703	3.30169	4.03624	5.04942	6.49706	9.10387	14.199	28.6073
0.246094	0.492188	0.738281	0.984375	1.23047	1.40317	1.70274	1.98407	2.3504	2.70703	3.30169	4.03624	5.04942	6.52509	9.11502	14.1995	28.6992
0.246094	0.492188	0.738281	0.984375	1.23047	1.40317	1.70379	1.98407	2.35236	2.70703	3.30746	4.03624	5.04942	6.53887	9.12379	14.206	28.9021
0.246094	0.492188	0.738281	0.984375	1.23047	1.40317	1.70425	1.98407	2.35318	2.70703	3.31046	4.03624	5.05918	6.53887	9.12732	14.2168	28.9376
0.246094	0.492188	0.738281	0.984375	1.23047	1.41273	1.71214	1.98407	2.35318	2.70703	3.31085	4.03624	5.06738	6.55201	9.12946	14.2182	29.0735
0.246094	0.492188	0.738281	0.984375	1.23047	1.41274	1.71647	1.98407	2.35318	2.71032	3.31085	4.03624	5.06738	6.55275	9.13587	14.2246	29.1203
0.246094	0.492188	0.738281	0.984375	1.23047	1.42184	1.71833	1.98407	2.35318	2.71297	3.31085	4.03791	5.06738	6.55332	9.14191	14.2449	29.2758
0.246094	0.492188	0.738281	0.984375	1.23047	1.42477	1.7211	1.98407	2.35318	2.71819	3.31085	4.04393	5.06738	6.56249	9.14222	14.2499	29.281
0.246094	0.492188	0.738281	0.984375	1.23047	1.42577	1.72183	1.98407	2.35318	2.71819	3.31085	4.05868	5.07335	6.57658	9.14529	14.2514	29.2862
0.246094	0.492188	0.738281	0.984375	1.23047	1.42577	1.72227	1.98407	2.35318	2.71819	3.31085	4.05868	5.07335	6.59077	9.14529	14.2586	29.3389
0.246094	0.492188	0.738281	0.984375	1.23047	1.42613	1.72254	1.98407	2.35318	2.71819	3.31085	4.05868	5.07335	6.61872	9.14529	14.3073	29.3828
0.246094	0.492188	0.738281	0.984375	1.23047	1.43117	1.72266	1.98407	2.35318	2.71819	3.31085	4.06827	5.07335	6.62628	9.14752	14.3073	29.409
0.246094	0.492188	0.738281	0.984375	1.23047	1.43311	1.72266	1.98407	2.35318	2.71819	3.31085	4.07201	5.07335	6.64467	9.14752	14.3127	29.4758
0.246094	0.492188	0.738281	0.984375	1.23047	1.43365	1.72266	1.98407	2.35318	2.72852	3.31085	4.07358	5.10137	6.6558	9.15088	14.3717	29.4953
0.246094	0.492188	0.738281	0.984375	1.23047	1.43461	1.72266	1.98407	2.3557	2.72852	3.31085	4.07358	5.1076	6.6558	9.15088	14.3889	29.4953
0.246094	0.492188	0.738281	0.984375	1.23047	1.43496	1.72266	1.98407	2.36045	2.72852	3.31085	4.07358	5.11096	6.67887	9.15522	14.406	29.5937
0.246094	0.492188	0.738281	0.984375	1.23047	1.43496	1.72266	1.98438	2.36077	2.72896	3.31085	4.07358	5.11362	6.67887	9.16768	14.4316	29.5937
0.246094	0.492188	0.738281	0.984375	1.23047	1.43496	1.72266	1.98438	2.36814	2.73977	3.32101	4.07358	5.11362	6.68542	9.16999	14.4486	29.6152
0.246094	0.492188	0.738281	0.984375	1.23047	1.43496	1.72266	1.98438	2.36815	2.73977	3.32346	4.07358	5.11362	6.68542	9.17086	14.4635	29.6258
0.246094	0.492188	0.738281	0.984375	1.23047	1.43496	1.72266	1.98438	2.36888	2.75141	3.3279	4.07358	5.11362	6.69447	9.17773	14.4757	29.7651
0.246094	0.492188	0.738281	0.984375	1.23047	1.43496	1.72266	1.98691	2.3691	2.75141	3.3279	4.08216	5.12088	6.69447	9.19691	14.4757	29.8292
0.246094	0.492188	0.738281	0.984375	1.23047	1.43496	1.72266	1.99614	2.3691	2.75141	3.3279	4.09089	5.12088	6.69447	9.20451	14.4882	29.8424
0.246094	0.492188	0.738281	0.984375	1.23047	1.43496	1.72266	1.99795	2.37157	2.75141	3.3279	4.09582	5.12088	6.70186	9.20451	14.4954	29.8533
0.246094	0.492188	0.738281	0.984375	1.23047	1.43496	1.72266	1.99933	2.38947	2.75141	3.3279	4.09582	5.13859	6.70186	9.20451	14.4968	29.9426
0.246094	0.492188	0.738281	0.984375	1.23047	1.43496	1.72266	1.99982	2.38969	2.75141	3.3279	4.09582	5.13859	6.70186	9.20451	14.5279	29.9426
0.246094	0.492188	0.738281	0.984375	1.23047	1.43496	1.72266	1.99982	2.38993	2.75141	3.33652	4.09582	5.13859	6.71705	9.20451	14.5279	29.98
0.246094	0.492188	0.738281	0.984375	1.23047	1.43496	1.72266	1.99982	2.4029	2.75141	3.33713	4.09582	5.13859	6.72156	9.21804	14.5279	30.0083
0.246094	0.492188	0.738281	0.984375	1.23047	1.43496	1.72266	1.99982	2.42125	2.75141	3.34724	4.09996	5.14917	6.73848	9.22441	14.5454	30.1171
0.246094	0.492188	0.738281	0.984375	1.23047	1.43496	1.72266	1.99982	2.42374	2.75141	3.34724	4.10591	5.14961	6.7476	9.22441	14.5695	30.1251
0.246094	0.492188	0.738281	0.984375	1.23047	1.43496	1.72266	1.99982	2.42374	2.75141	3.34724	4.1104	5.16797	6.7476	9.22441	14.5944	30.1422
0.246094	0.492188	0.738281	0.984375	1.23047	1.43496	1.72266	1.99982	2.42374	2.75141	3.34724	4.12528	5.16797	6.7476	9.22788	14.6338	30.3632
0.246094	0.492188	0.738281	0.984375	1.23047	1.43496	1.72266	1.99982	2.42374	2.75141	3.34724	4.12528	5.17382	6.7575	9.23121	14.6348	30.3903
0.246094	0.492188	0.738281	0.984375	1.23047	1.43496	1.72266	1.99982	2.42374	2.75141	3.34724	4.12528	5.17382	6.77093	9.23556	14.6369	30.4093
0.246094	0.492188	0.738281	0.984375	1.23047	1.43496	1.72266	1.99982	2.42374	2.75141	3.34724	4.12528	5.17382	6.7749	9.23753	14.6379	30.5097
0.246094	0.492188	0.738281	0.985432	1.23047	1.43496	1.72266	1.99982	2.42374	2.75141	3.34724	4.12528	5.17462	6.80662	9.26115	14.6379	30.5196
0.246094	0.492188	0.738281	0.986133	1.23047	1.43496	1.72266	1.99982	2.42374	2.75141	3.34724	4.12832	5.19135	6.82467	9.32406	14.6495	30.5196
0.246094	0.492188	0.738281	0.989123	1.23047	1.43496	1.72266	1.99982	2.42374	2.75141	3.34724	4.12832	5.19135	6.83769	9.34061	14.6524	30.5573
0.246094	0.492188	0.738281	0.989258	1.23047	1.43496	1.72266	1.99982	2.42416	2.75141	3.34724	4.12832	5.21291	6.84211	9.34307	14.6834	30.5652
0.246094	0.492188	0.738281	0.989893	1.23047	1.43496	1.72266	1.99982	2.43169	2.75141	3.35677	4.12832	5.21463	6.84211	9.35156	14.743	30.5959
0.246094	0.492188	0.738281	0.991324	1.23047	1.43496	1.72266	1.99982	2.4362	2.75141	3.35953	4.14526	5.21463	6.84211	9.3606	14.743	30.6582
0.246094	0.492188	0.738281	0.992188	1.23047	1.43496	1.72266	1.99982	2.4362	2.75141	3.37025	4.15802	5.21489	6.84211	9.38029	14.7492	30.7144
0.246094	0.492188	0.738281	0.992188	1.23047	1.43496	1.72266	1.99982	2.43989	2.75141	3.3738	4.15802	5.22022	6.86064	9.41272	14.7499	30.7144
0.246094	0.492188	0.738281	0.992188	1.23047	1.43496	1.72266	1.99982	2.44095	2.75141	3.3738	4.15802	5.22044	6.86064	9.42253	14.7677	30.7657
0.246094	0.492188	0.738281	0.992188	1.23047	1.43496	1.72266	2.00285	2.44188	2.75141	3.3738	4.15802	5.22044	6.86064	9.4239	14.7679	31.1219
0.246094	0.492188	0.738281	0.992188	1.23047	1.43496	1.72266	2.00476	2.44298	2.75141	3.41884	4.16215	5.22044	6.86064	9.43601	14.7705	31.1384
0.246094	0.492188	0.738281	0.992188	1.23047	1.43496	1.72266	2.005	2.44298	2.75141	3.41884	4.1698	5.22044	6.86771	9.44534	14.7932	31.153
0.246094	0.492188	0.738281	0.992188	1.23047	1.43496	1.72266	2.00669	2.44298	2.75141	3.41884	4.17635	5.22122	6.87855	9.44534	14.8168	31.1676
0.246094	0.492188	0.738281	0.992188	1.23047	1.43496	1.72266	2.01255	2.44298	2.75141	3.41884	4.17635	5.2237	6.89195	9.44534	14.8168	31.3091
0.246094	0.492188	0.738281	0.992188	1.23047	1.43496	1.72266	2.01479	2.44298	2.75141	3.42213	4.18204	5.23045	6.89502	9.44534	14.8407	31.3535
0.246094	0.492188	0.738281	0.992188	1.23047	1.43496	1.72266	2.01643	2.44298	2.75141	3.42565	4.18328	5.23202	6.89502	9.47786	14.8431	31.3921
0.246094	0.492188	0.738281	0.992188	1.23047	1.43496	1.72266	2.02017	2.44298	2.75141	3.42769	4.18359	5.23202	6.90122	9.49616	14.8664	31.5778
0.246094	0.492188	0.738281	0.992188	1.23047	1.43496	1.72513	2.02314	2.44298	2.75141	3.42769	4.18359	5.23255	6.90979	9.50572	14.8678	31.5778
0.246094	0.492188	0.738281	0.992188	1.23047	1.43496	1.72583	2.02934	2.44298	2.75141	3.42769	4.18359	5.23255	6.90979	9.52965	14.8739	31.6783
0.246094	0.492188	0.738281	0.992188	1.23047	1.43496	1.72756	2.02934	2.44298	2.75141	3.42769	4.18359	5.23496	6.90979	9.54578	14.8739	31.8832
0.246094	0.492188	0.738281	0.992188	1.23047	1.43496	1.73633	2.02934	2.44298	2.75141	3.42769	4.18359	5.24809	6.90979	9.57474	14.9146	31.8832
0.246094	0.492188	0.738281	0.992188	1.23047	1.43496	1.73633	2.02934	2.44298	2.75141	3.42769	4.18359	5.26088	6.90979	9.58979	14.9654	31.9021
0.246094	0.492188	0.738281	0.992188	1.23047	1.43496	1.73633	2.02934	2.44316	2.75141	3.42769	4.18359	5.26664	6.90979	9.59766	14.9755	31.9448
0.246094	0.492188	0.738281	0.992188	1.23047	1.43496	1.73633	2.02934	2.44331	2.75141	3.42769	4.18359	5.26664	6.90979	9.61027	14.9936	31.9931
0.246094	0.492868	0.738281	0.992188	1.23047	1.43496	1.73713	2.02934	2.45352	2.75141	3.42769	4.19083	5.26896	6.91869	9.61027	14.995	32.0121
0.246094	0.493516	0.738281	0.992188	1.23047	1.43496	1.73878	2.02934	2.45554	2.75141	3.43017	4.19083	5.27309	6.93006	9.61027	15.0621	32.0121
0.246094	0.494495	0.738281	0.992188	1.23047	1.43496	1.74015	2.02934	2.45559	2.75141	3.43323	4.19083	5.2798	6.93006	9.61027	15.1064	32.0348
0.246094	0.49471	0.738281	0.992188	1.23047	1.43496	1.74015	2.02934	2.45818	2.75141	3.43456	4.19083	5.28386	6.93006	9.67621	15.1082	32.0537
0.246094	0.495029	0.740464	0.992188	1.23047	1.43496	1.74015	2.03035	2.45891	2.76622	3.44531	4.19083	5.28386	6.93443	9.68559	15.1102	32.0682
0.246094	0.495368	0.740779	0.992188	1.23047	1.43496	1.74015	2.03489	2.46094	2.77325	3.44531	4.19083	5.28386	6.93443	9.70241	15.1309	32.1178
0.246094	0.495664	0.74226	0.992188	1.23047	1.43496	1.74015	2.03537	2.46094	2.77325	3.44531	4.19083	5.28386	6.96493	9.70745	15.1329	32.2983
0.246094	0.496094	0.743578	0.992188	1.23047	1.43496	1.74015	2.0415	2.46094	2.77325	3.44531	4.19083	5.28386	6.96493	9.70745	15.1802	32.4191
0.246094	0.496094	0.744141	0.992188	1.23047	1.43496	1.74015	2.04229	2.46094	2.77325	3.44531	4.19083	5.28386	6.96493	9.70745	15.2302	32.4695
0.246094	0.496094	0.744141	0.992188	1.23047	1.43496	1.74015	2.04545	2.46094	2.77325	3.44531	4.19869	5.29757	6.96493	9.70745	15.3087	32.6564
0.246094	0.496094	0.744141	0.992188	1.23047	1.43496	1.74015	2.04545	2.46094	2.77325	3.44598	4.20142	5.30102	6.96493	9.70745	15.3488	32.8634
0.246094	0.496094	0.744141	0.992188	1.23047	1.43496	1.74015	2.04545	2.46094	2.77325	3.44598	4.20525	5.30102	6.96928	9.70745	15.3601	32.9297
0.246094	0.496094	0.744141	0.992188	1.23047	1.43496	1.74015	2.04545	2.46094	2.77325	3.45016	4.20641	5.30102	6.96928	9.70784	15.3789	32.9802
0.246094	0.496094	0.744141	0.992188	1.23047	1.43496	1.74015	2.04545	2.46094	2.77325	3.45409	4.21245	5.30102	6.9768	9.73549	15.4177	32.9802
0.246094	0.496094	0.744141	0.992188	1.23047	1.43496	1.74015	2.04545	2.46094	2.77325	3.45409	4.22311	5.30102	6.98506	9.74482	15.4177	33.0792
0.246094	0.496094	0.744141	0.992188	1.23047	1.43496	1.74015	2.04545	2.46094	2.77325	3.45409	4.22409	5.30102	6.98506	9.7467	15.455	33.1716
0.246094	0.496094	0.744141	0.992188	1.23047	1.43496	1.74015	2.04545	2.46094	2.77325	3.45409	4.22825	5.30102	6.98947	9.75103	15.455	33.2372
0.246094	0.496094	0.744141	0.992188	1.23047	1.43496	1.74015	2.04545	2.46094	2.77325	3.45409	4.23396	5.31243	6.98947	9.76246	15.4626	33.5456
0.246094	0.496094	0.744141	0.992188	1.23047	1.43496	1.74015	2.04545	2.46094	2.77325	3.45409	4.23396	5.31243	6.98947	9.7845	15.4766	33.7041
0.246094	0.496094	0.744141	0.992188	1.23047	1.43496	1.74015	2.04545	2.46094	2.77325	3.45409	4.23396	5.32382	6.99963	9.78751	15.4883	33.7157
0.246094	0.496094	0.744141	0.992188	1.23047	1.43496	1.74015	2.04545	2.46094	2.77797	3.45489	4.23396	5.32382	6.99963	9.80059	15.5195	33.8725
0.246094	0.496094	0.744141	0.992188	1.23047	1.43496	1.74015	2.04545	2.46094	2.78366	3.45489	4.23396	5.34309	6.99963	9.81213	15.5302	33.9369
0.246094	0.496094	0.744141	0.993157	1.23047	1.43496	1.74015	2.05111	2.46094	2.78423	3.45489	4.23396	5.35144	6.99963	9.81275	15.5342	33.9645
0.246094	0.496094	0.744141	0.993356	1.23047	1.43496	1.74015	2.05237	2.46094	2.78423	3.48029	4.23396	5.3546	7.00101	9.81275	15.5643	33.9859
0.246094	0.496094	0.744141	0.994711	1.23047	1.43496	1.74015	2.06505	2.46094	2.78423	3.48029	4.23396	5.3546	7.00395	9.82216	15.6051	34.129
0.246094	0.496094	0.744141	0.99696	1.23047	1.43496	1.74015	2.06848	2.46094	2.78423	3.48029	4.24064	5.37477	7.0182	9.83452	15.6104	34.1601
0.246094	0.496094	0.744141	0.997188	1.23047	1.43496	1.74015	2.07304	2.46094	2.78423	3.48029	4.24488	5.37477	7.02038	9.8364	15.6289	34.2079
0.246094	0.496094	0.744141	0.997407	1.23047	1.43496	1.74015	2.07757	2.46094	2.78675	3.48029	4.24824	5.37897	7.02061	9.84375	15.6342	34.2106
0.246094	0.496094	0.744141	0.999969	1.23047	1.43496	1.74015	2.08188	2.46094	2.79277	3.48029	4.2556	5.38848	7.03845	9.84718	15.642	34.2504
0.246094	0.496094	0.744141	1.00135	1.23047	1.43496	1.74015	2.08704	2.46094	2.8059	3.48029	4.26143	5.38907	7.04705	9.8714	15.698	34.4399
0.246094	0.496094	0.744141	1.00196	1.23047	1.43496	1.74015	2.08711	2.46094	2.8059	3.48029	4.26756	5.39559	7.04705	9.87182	15.7038	34.5593
0.246094	0.496094	0.744141	1.00298	1.23047	1.43496	1.74015	2.08817	2.46094	2.8059	3.48029	4.26756	5.39726	7.05518	9.87972	15.7057	34.6293
0.246094	0.496094	0.744141	1.00299	1.23047	1.43862	1.74015	2.08817	2.46094	2.8059	3.48029	4.26756	5.39726	7.05518	9.8846	15.7524	34.7001
0.246094	0.496094	0.744141	1.00356	1.23047	1.44164	1.74015	2.09579	2.46094	2.8059	3.48029	4.27684	5.39726	7.05954	9.89285	15.7577	34.7001
0.246094	0.496094	0.744141	1.00442	1.23047	1.4447	1.74015	2.09917	2.46094	2.8059	3.4815	4.28195	5.39726	7.07223	9.89897	15.8497	34.7271
0.246094	0.496094	0.744141	1.00513	1.23047	1.44635	1.74015	2.09938	2.46094	2.8059	3.4815	4.28735	5.39726	7.09843	9.89897	15.8692	34.8594
0.246094	0.496094	0.744141	1.00588	1.23047	1.44635	1.74015	2.09982	2.46094	2.8059	3.4815	4.28993	5.39726	7.10298	9.90325	15.8726	34.8655
0.246094	0.496094	0.744141	1.00726	1.23047	1.44635	1.74015	2.1026	2.46094	2.8059	3.49765	4.29784	5.39726	7.10298	9.90814	15.8827	34.9453
0.246094	0.496094	0.744141	1.01467	1.23047	1.44635	1.74015	2.10263	2.46094	2.8059	3.49765	4.30488	5.39726	7.10298	9.91257	15.8924	34.9488
0.246094	0.496094	0.744141	1.01467	1.23047	1.44635	1.74015	2.10263	2.46094	2.81069	3.49765	4.33195	5.40286	7.10449	9.91257	15.9031	34.9531
0.246094	0.496094	0.744141	1.01467	1.23047	1.44635	1.74015	2.10263	2.46094	2.82817	3.50242	4.33905	5.40286	7.13627	9.92188	15.906	35.0975
0.246094	0.496094	0.744141	1.01467	1.23047	1.44635	1.74015	2.10263	2.46094	2.82817	3.50432	4.33905	5.40286	7.13672	9.93427	15.9234	35.1354
0.246094	0.496094	0.744141	1.01467	1.23047	1.44635	1.74015	2.10263	2.46094	2.82817	3.50995	4.34194	5.40286	7.13672	9.95181	15.9961	35.1664
0.246094	0.496094	0.744141	1.01467	1.23047	1.44635	1.74015	2.10263	2.46094	2.82817	3.52353	4.34534	5.40286	7.1383	9.96604	16.0241	35.3254
0.246094	0.496094	0.744141	1.01467	1.23047	1.44635	1.74015	2.10263	2.46094	2.83389	3.52353	4.34666	5.41406	7.14096	9.96604	16.0433	35.3597
0.246094	0.496094	0.744141	1.01467	1.23047	1.44635	1.74015	2.10263	2.46094	2.86992	3.52353	4.35384	5.41965	7.14185	9.96604	16.049	35.4384
0.246094	0.496094	0.744141	1.01467	1.23047	1.44635	1.74015	2.10263	2.46094	2.86992	3.52353	4.35384	5.41965	7.14302	9.97648	16.049	35.7048
0.246094	0.496094	0.744141	1.01467	1.23047	1.44635	1.74015	2.10263	2.46094	2.86992	3.52353	4.36079	5.41965	7.15	9.97999	16.0923	35.7073
0.246094	0.496094	0.744141	1.01467	1.23047	1.44635	1.74015	2.10263	2.46094	2.86992	3.52353	4.36079	5.41999	7.16636	9.98379	16.1093	35.7446
0.246094	0.496094	0.744141	1.01467	1.23047	1.44635	1.74015	2.10263	2.46094	2.86992	3.52353	4.36079	5.43451	7.17197	9.98678	16.1243	35.7954
0.246094	0.496094	0.744141	1.01467	1.23047	1.44635	1.74015	2.10475	2.46094	2.86992	3.52353	4.36079	5.43639	7.1748	9.99335	16.1787	35.798
0.246094	0.496094	0.744141	1.01467	1.23237	1.44635	1.74015	2.10475	2.46094	2.86992	3.52541	4.38157	5.44009	7.1748	10.0015	16.2144	35.9331
0.246094	0.496094	0.744141	1.01467	1.23281	1.44635	1.74015	2.10475	2.46094	2.86992	3.52541	4.38157	5.44574	7.1748	10.0289	16.2347	35.9676
0.246094	0.496094	0.744141	1.01467	1.23307	1.44635	1.74015	2.10475	2.46094	2.86992	3.54083	4.38157	5.44574	7.1748	10.0387	16.2347	35.9811
0.246094	0.496094	0.744141	1.01467	1.23336	1.44635	1.74015	2.10475	2.46094	2.86992	3.54249	4.3954	5.46267	7.1748	10.0405	16.2598	36.0416
0.246094	0.496094	0.744141	1.01467	1.23549	1.44635	1.74015	2.11279	2.46094	2.86992	3.54921	4.3954	5.46417	7.17914	10.0451	16.3127	36.0618
0.246094	0.496094	0.744141	1.01467	1.23699	1.44635	1.74015	2.115	2.46094	2.86992	3.54921	4.40226	5.46417	7.17963	10.0451	16.3184	36.1984
0.246094	0.496094	0.744141	1.01467	1.23774	1.44635	1.74015	2.11524	2.46094	2.86992	3.54921	4.40226	5.46417	7.18745	10.0528	16.3333	36.2769
0.246094	0.496094	0.744141	1.01467	1.24023	1.44635	1.74015	2.11698	2.46094	2.86992	3.55149	4.40226	5.4878	7.18745	10.0792	16.3354	36.3561
0.246094	0.496094	0.744141	1.01467	1.24023	1.44635	1.74015	2.11698	2.46094	2.86992	3.55149	4.40226	5.49075	7.18745	10.1001	16.3611	36.6754
0.246094	0.496094	0.744141	1.01467	1.24023	1.44635	1.74015	2.11698	2.46094	2.86992	3.55149	4.40226	5.50282	7.18745	10.1018	16.3611	36.6977
0.246094	0.496094	0.744141	1.01467	1.24023	1.44635	1.74015	2.11698	2.47321	2.8757	3.55149	4.40551	5.50282	7.20429	10.1168	16.3925	36.7332
0.246094	0.496094	0.744141	1.01467	1.24023	1.452	1.74015	2.11698	2.47321	2.88045	3.5591	4.41635	5.50753	7.20429	10.1258	16.4165	36.7348
0.246094	0.496094	0.744141	1.01467	1.24023	1.45541	1.74015	2.11698	2.47321	2.88045	3.56449	4.41635	5.53027	7.20429	10.1294	16.4444	36.748
0.246094	0.496094	0.744141	1.01467	1.24023	1.45891	1.74015	2.11698	2.47321	2.88045	3.57738	4.41635	5.53027	7.21045	10.1299	16.4497	36.7826
0.246094	0.496094	0.744141	1.01467	1.24023	1.46019	1.74015	2.11698	2.47321	2.88045	3.57738	4.43283	5.53027	7.23175	10.1434	16.5011	36.8993
0.246094	0.496094	0.744141	1.01467	1.24023	1.46479	1.74015	2.11698	2.47321	2.88045	3.57738	4.43652	5.53027	7.23175	10.1467	16.5085	36.996
0.246094	0.496094	0.744141	1.01467	1.24023	1.46664	1.74015	2.11698	2.47321	2.88045	3.58302	4.43652	5.53027	7.23175	10.1479	16.5926	37.0058
0.246094	0.496094	0.744141	1.01467	1.24023	1.4695	1.74015	2.11698	2.47321	2.88264	3.58318	4.43652	5.53082	7.23783	10.1646	16.5981	37.0165
0.246094	0.496094	0.744141	1.01467	1.24023	1.46953	1.74015	2.11698	2.47321	2.88326	3.58318	4.43652	5.54157	7.24202	10.1735	16.6418	37.023
0.246094	0.496094	0.744141	1.01467	1.24023	1.47481	1.74015	2.11698	2.47321	2.8927	3.58318	4.43652	5.54511	7.26146	10.1772	16.6487	37.0483
0.246094	0.496094	0.744141	1.01467	1.24023	1.47656	1.74015	2.11698	2.47321	2.8927	3.58318	4.43652	5.5465	7.26706	10.179	16.7126	37.121
0.246094	0.496094	0.744141	1.01467	1.24023	1.47656	1.74015	2.11698	2.47321	2.90331	3.58318	4.43652	5.54754	7.27123	10.179	16.7684	37.1732
0.246094	0.496094	0.744141	1.01467	1.24023	1.47656	1.74015	2.11698	2.47321	2.90331	3.60412	4.43652	5.54826	7.30447	10.1846	16.7723	37.183
0.246094	0.496094	0.744141	1.01467	1.24023	1.47656	1.74015	2.11698	2.47321	2.90331	3.61162	4.43652	5.55196	7.30447	10.1981	16.794	37.2651
0.246094	0.496094	0.744141	1.01467	1.24023	1.47656	1.74015	2.11698	2.47321	2.92053	3.61162	4.43652	5.55213	7.30447	10.2272	16.794	37.2773
0.246094	0.496094	0.744141	1.01467	1.24023	1.47656	1.74015	2.11698	2.47321	2.9258	3.63353	4.43652	5.55213	7.30447	10.2272	16.8354	37.3366
0.246094	0.496094	0.744141	1.01467	1.24023	1.47656	1.74015	2.11698	2.47321	2.92652	3.63353	4.43652	5.55213	7.30861	10.2272	16.8498	37.4232
0.246094	0.496094	0.744141	1.01467	1.24023	1.47656	1.74015	2.11698	2.47321	2.94357	3.63353	4.43652	5.55213	7.31689	10.234	16.9291	37.4362
0.246094	0.496094	0.744141	1.01467	1.24023	1.47656	1.74015	2.11698	2.47321	2.94792	3.63353	4.4372	5.57933	7.31689	10.2543	16.9662	37.4645
0.246094	0.496094	0.744141	1.01467	1.24023	1.47656	1.74015	2.11698	2.47321	2.95312	3.64488	4.4372	5.59142	7.32474	10.2553	16.9823	37.5428
0.246094	0.496094	0.744141	1.01467	1.24023	1.47656	1.74015	2.11698	2.47321	2.95312	3.65845	4.4372	5.59619	7.32474	10.2565	16.9965	37.6652
0.246094	0.496094	0.744141	1.01467	1.24023	1.47656	1.74015	2.11698	2.47321	2.95312	3.65845	4.43902	5.6118	7.34168	10.2565	17.0588	37.6724
0.246094	0.496094	0.744141	1.01467	1.24023	1.47656	1.74015	2.11698	2.47727	2.95312	3.65845	4.45695	5.6118	7.34168	10.2685	17.0854	37.6773
0.246094	0.496094	0.744141	1.01467	1.24023	1.47656	1.74015	2.11698	2.4783	2.95312	3.65845	4.47173	5.61719	7.34168	10.2801	17.0865	37.7495
0.246094	0.496094	0.744141	1.01467	1.24023	1.47656	1.74015	2.11698	2.48047	2.95312	3.65845	4.47173	5.61719	7.34361	10.2902	17.0942	37.7519
0.246094	0.496094	0.744141	1.01467	1.24023	1.47656	1.74015	2.11698	2.48047	2.95312	3.65845	4.47173	5.61719	7.36046	10.2902	17.1062	37.8601
0.246094	0.496094	0.744141	1.01467	1.24023	1.47656	1.74015	2.11698	2.48047	2.9552	3.65845	4.47173	5.62687	7.37222	10.2902	17.1208	37.9088
0.246094	0.496094	0.744141	1.01467	1.24023	1.47656	1.74015	2.11698	2.48047	2.96336	3.65845	4.47173	5.62726	7.3746	10.2902	17.187	38.0332
0.246094	0.496094	0.744141	1.01467	1.24023	1.47656	1.74015	2.11698	2.48047	2.96336	3.65845	4.47321	5.64006	7.37496	10.2964	17.1995	38.1517
0.246094	0.496094	0.744141	1.01467	1.24023	1.47656	1.74225	2.11698	2.48047	2.96336	3.65845	4.47673	5.65213	7.38281	10.3287	17.2156	38.1644
0.246094	0.496094	0.744141	1.01467	1.24023	1.47656	1.74428	2.11698	2.48047	2.96336	3.65845	4.47774	5.66304	7.38281	10.3326	17.2283	38.2911
0.246094	0.496094	0.744141	1.01467	1.24023	1.47656	1.74712	2.11698	2.48115	2.96336	3.65845	4.49079	5.67277	7.38691	10.3433	17.2299	38.2966
0.246094	0.496094	0.744141	1.01467	1.24023	1.47656	1.74759	2.11698	2.49001	2.96336	3.65845	4.49079	5.68152	7.38691	10.3506	17.2424	38.3038
0.246094	0.496094	0.746141	1.01467	1.24023	1.47656	1.74898	2.11698	2.49284	2.96336	3.65845	4.49079	5.68152	7.40329	10.374	17.2494	38.4324
0.246094	0.496094	0.746355	1.01467	1.24023	1.47656	1.75333	2.11698	2.49284	2.96336	3.65845	4.50364	5.68152	7.40329	10.3884	17.3265	38.5056
0.246094	0.496094	0.74716	1.01467	1.24023	1.47656	1.75377	2.11698	2.49284	2.97342	3.66237	4.51768	5.68152	7.43904	10.4089	17.3367	38.5056
0.246094	0.496094	0.748862	1.01467	1.24023	1.47656	1.75396	2.11931	2.49284	2.97356	3.66237	4.51768	5.68152	7.44001	10.4467	17.3474	38.5198
0.246094	0.496094	0.749718	1.01467	1.24023	1.47656	1.75396	2.11931	2.50029	2.97356	3.66491	4.52438	5.68539	7.44001	10.4497	17.3474	38.5622
[truncated: 13,233 more rows]
