# Supplementary material for: Long-term intravital imaging of the multicolor-coded tumor microenvironment during combination immunotherapy
Source: eLife journal article supplement (doi:10.7554/elife.14756), 2016-11-18
Supplement: supp [file elife_poa_e14756_Figure_5_source_data_6.xls]

## Sheet: displacement(um）
0	0	0	0	0	0	0	0	0	0	0	0	0	0	0	0	0	0	0	0	0	0	0	0	0	0	0	0	0	0
0	0	0	0	0	0	0	0	0	0	0	0	0	0	0	0	0	0	0	0	0	0	0	0	0	0	0	0	0	0
0	0	0	0	0	0	0	0	0	0	0	0	0	0	0	0	0	0	0	0	0	0	0	0	0	0	0	0.114772	0.0621709	0.0374389
0	0	0	0	0	0	0	0	0	0	0	0	0	0	0	0	0	0	0	0	0	0	0	0.0570953	0.0932657	0.0464202	0.0981308	0.128414	0.112072	0.349414
0	0	0	0	0	0	0	0	0	0	0	0	0	0	0	0	0	0	0	0	0	0	0.0148352	0.121741	0.147087	0.137943	0.104433	0.170426	0.126281	0.434683
0	0	0	0	0	0	0	0	0	0	0	0	0	0	0	0	0	0	0	0	0.0835857	0	0.0342219	0.127781	0.167551	0.17098	0.170719	0.177197	0.19658	0.454451
0	0	0	0	0	0	0	0	0	0	0	0	0	0	0	0	0	0	0	0	0.117641	0	0.0570953	0.143204	0.17577	0.209402	0.205975	0.248047	0.248047	0.682699
0	0	0	0	0	0	0	0	0	0	0	0	0	0	0	0	0	0	0	0.0828798	0.131649	0.0363041	0.152571	0.202877	0.19694	0.211645	0.233568	0.248047	0.248047	0.751707
0	0	0	0	0	0	0	0	0	0	0	0	0	0	0	0	0	0	0	0.0851153	0.133408	0.0570953	0.175956	0.211119	0.227143	0.214573	0.248047	0.248047	0.402379	0.808256
0	0	0	0	0	0	0	0	0	0	0	0	0	0	0	0	0	0	0	0.129974	0.175693	0.13919	0.17715	0.218794	0.233332	0.248047	0.248047	0.262391	0.411408	0.999909
0	0	0	0	0	0	0	0	0	0	0	0	0	0	0	0	0	0	0	0.147313	0.188392	0.150295	0.203402	0.224928	0.238035	0.248047	0.248047	0.287909	0.459533	1.01963
0	0	0	0	0	0	0	0	0	0	0	0	0	0	0	0	0	0	0	0.150007	0.192421	0.17639	0.203892	0.235782	0.241815	0.248047	0.248047	0.350791	0.466448	1.13669
0	0	0	0	0	0	0	0	0	0	0	0	0	0	0	0	0	0	0	0.152063	0.209402	0.19362	0.216155	0.238006	0.248047	0.248047	0.344852	0.398034	0.53264	1.13709
0	0	0	0	0	0	0	0	0	0	0	0	0	0	0	0	0	0	0	0.17672	0.219218	0.200699	0.231038	0.248047	0.248047	0.248047	0.345237	0.423333	0.679519	1.24023
0	0	0	0	0	0	0	0	0	0	0	0	0	0	0	0	0	0	0	0.177099	0.221005	0.202587	0.235179	0.248047	0.248047	0.248047	0.350791	0.440173	0.706964	1.24023
0	0	0	0	0	0	0	0	0	0	0	0	0	0	0	0	0	0	0.0425167	0.196613	0.226816	0.20378	0.239236	0.248047	0.248047	0.304857	0.350791	0.441052	0.744141	1.24023
0	0	0	0	0	0	0	0	0	0	0	0	0	0	0	0	0	0	0.0568942	0.216195	0.22843	0.211638	0.248047	0.248047	0.248047	0.312859	0.350791	0.487231	0.750185	1.24023
0	0	0	0	0	0	0	0	0	0	0	0	0	0	0	0	0	0	0.0952927	0.222757	0.233478	0.212631	0.248047	0.248047	0.248047	0.331849	0.359568	0.497857	0.793153	1.24513
0	0	0	0	0	0	0	0	0	0	0	0	0	0	0	0	0	0	0.113423	0.233196	0.233481	0.221384	0.248047	0.248047	0.253754	0.350791	0.382335	0.511659	0.801882	1.39458
0	0	0	0	0	0	0	0	0	0	0	0	0	0	0	0	0	0.0715632	0.132575	0.233478	0.238993	0.222128	0.248047	0.248047	0.288639	0.350791	0.393652	0.519827	0.867897	1.39884
0	0	0	0	0	0	0	0	0	0	0	0	0	0	0	0	0	0.0764823	0.136357	0.237223	0.239106	0.225355	0.248047	0.248047	0.301964	0.352639	0.398732	0.52351	0.881536	1.55609
0	0	0	0	0	0	0	0	0	0	0	0	0	0	0	0	0	0.104887	0.148937	0.237638	0.246014	0.228222	0.248047	0.257671	0.316388	0.378228	0.410567	0.55291	0.894941	1.60379
0	0	0	0	0	0	0	0	0	0	0	0	0	0	0	0	0	0.11555	0.153496	0.240982	0.248047	0.240406	0.248047	0.259736	0.328166	0.378478	0.426017	0.611488	0.974883	1.75396
0	0	0	0	0	0	0	0	0	0	0	0	0	0	0	0	0.0585477	0.120208	0.155097	0.243979	0.248047	0.248047	0.248047	0.264046	0.33267	0.384292	0.434333	0.613367	1.01764	1.75396
0	0	0	0	0	0	0	0	0	0	0	0	0	0	0	0	0.0963799	0.138375	0.179931	0.248047	0.248047	0.248047	0.248047	0.273183	0.338993	0.387605	0.442857	0.677298	1.05237	1.75396
0	0	0	0	0	0	0	0	0	0	0	0	0	0	0	0	0.103394	0.141093	0.185046	0.248047	0.248047	0.248047	0.252245	0.301964	0.339051	0.389777	0.451959	0.687829	1.12894	1.75396
0	0	0	0	0	0	0	0	0	0	0	0	0	0	0	0	0.103609	0.149964	0.194273	0.248047	0.248047	0.248047	0.273464	0.304276	0.342576	0.406214	0.464982	0.744141	1.18896	1.75396
0	0	0	0	0	0	0	0	0	0	0	0	0	0	0	0	0.106309	0.155608	0.206299	0.248047	0.248047	0.248047	0.275006	0.311832	0.350791	0.411202	0.47664	0.744141	1.19056	1.75396
0	0	0	0	0	0	0	0	0	0	0	0	0	0	0	0	0.130428	0.183233	0.221394	0.248047	0.248047	0.248047	0.276804	0.315416	0.350791	0.411456	0.496094	0.774564	1.20986	1.75396
0	0	0	0	0	0	0	0	0	0	0	0	0	0	0	0	0.145738	0.18424	0.233478	0.248047	0.248047	0.248047	0.281853	0.320375	0.350795	0.421557	0.499439	0.784393	1.21369	1.77546
0	0	0	0	0	0	0	0	0	0	0	0	0	0	0	0	0.159782	0.192376	0.242935	0.248047	0.248047	0.248047	0.29145	0.321789	0.376497	0.436794	0.511272	0.784393	1.21694	1.83616
0	0	0	0	0	0	0	0	0	0	0	0	0	0	0	0	0.163219	0.193499	0.243203	0.248047	0.248047	0.248047	0.291519	0.325159	0.380046	0.448172	0.520562	0.784393	1.24023	1.93108
0	0	0	0	0	0	0	0	0	0	0	0	0	0	0	0.0570953	0.165779	0.196346	0.24568	0.248047	0.248047	0.248047	0.301964	0.327413	0.380867	0.449879	0.528398	0.800375	1.24023	1.94069
0	0	0	0	0	0	0	0	0	0	0	0	0	0	0	0.0570953	0.17139	0.209714	0.248047	0.248047	0.248047	0.248047	0.301964	0.331945	0.387543	0.451892	0.534076	0.866601	1.24023	1.95596
0	0	0	0	0	0	0	0	0	0	0	0	0	0	0	0.11144	0.178995	0.219198	0.248047	0.248047	0.248047	0.248047	0.315425	0.34006	0.397549	0.46487	0.577955	0.892385	1.24023	2.01125
0	0	0	0	0	0	0	0	0	0	0	0	0	0	0	0.119871	0.180162	0.225577	0.248047	0.248047	0.248047	0.248445	0.323791	0.34853	0.40336	0.471559	0.598692	0.894346	1.24023	2.05218
0	0	0	0	0	0	0	0	0	0	0	0	0	0	0	0.125431	0.188493	0.227859	0.248047	0.248047	0.248047	0.25341	0.326587	0.350791	0.423613	0.474708	0.640273	0.894982	1.24023	2.18649
0	0	0	0	0	0	0	0	0	0	0	0	0	0	0	0.130626	0.191099	0.229	0.248047	0.248047	0.248047	0.259833	0.328345	0.350791	0.450503	0.47747	0.647194	0.900184	1.27379	2.29103
0	0	0	0	0	0	0	0	0	0	0	0	0	0	0	0.133836	0.191889	0.229526	0.248047	0.248047	0.254192	0.275142	0.33033	0.350791	0.454587	0.496094	0.661289	0.90211	1.3037	2.29586
0	0	0	0	0	0	0	0	0	0	0	0	0	0	0	0.133912	0.196113	0.229979	0.248047	0.248047	0.260442	0.283403	0.330602	0.355457	0.454858	0.496094	0.693995	0.97075	1.33577	2.3538
0	0	0	0	0	0	0	0	0	0	0	0	0	0	0.0412027	0.136991	0.197005	0.232751	0.248047	0.248047	0.261671	0.287976	0.334918	0.35632	0.465408	0.496094	0.701583	0.974232	1.36892	2.36377
0	0	0	0	0	0	0	0	0	0	0	0	0	0	0.0570953	0.138683	0.201403	0.233478	0.248047	0.248047	0.270697	0.290167	0.344049	0.370955	0.468489	0.496094	0.73118	0.992188	1.42851	2.36539
0	0	0	0	0	0	0	0	0	0	0	0	0	0	0.0825301	0.14219	0.204599	0.243366	0.248047	0.248047	0.271517	0.301964	0.348955	0.388809	0.480472	0.502183	0.744141	1.02125	1.44635	2.45618
0	0	0	0	0	0	0	0	0	0	0	0	0	0	0.0904372	0.143232	0.211499	0.244421	0.248047	0.250657	0.273335	0.303202	0.350375	0.394315	0.486181	0.513408	0.744141	1.02272	1.44635	2.48047
0	0	0	0	0	0	0	0	0	0	0	0	0	0	0.127103	0.151323	0.220824	0.248047	0.248047	0.251589	0.279379	0.306638	0.350791	0.43113	0.494884	0.517122	0.744141	1.0966	1.45611	2.48047
0	0	0	0	0	0	0	0	0	0	0	0	0	0	0.127181	0.160644	0.222333	0.248047	0.248047	0.25232	0.279644	0.316343	0.350791	0.4331	0.496094	0.536691	0.744141	1.1093	1.48828	2.48047
0	0	0	0	0	0	0	0	0	0	0	0	0	0	0.134448	0.163611	0.230816	0.248047	0.248047	0.253951	0.281702	0.316755	0.350791	0.434059	0.496094	0.54969	0.744141	1.12449	1.50881	2.48047
0	0	0	0	0	0	0	0	0	0	0	0	0	0	0.135542	0.164586	0.232533	0.248047	0.248047	0.263551	0.283269	0.322736	0.358778	0.447392	0.496094	0.55465	0.744141	1.17875	1.58827	2.63236
0	0	0	0	0	0	0	0	0	0	0	0	0	0	0.139084	0.165228	0.233478	0.248047	0.248047	0.264011	0.291437	0.331694	0.359986	0.450696	0.496094	0.55465	0.763162	1.18504	1.58827	2.63426
0	0	0	0	0	0	0	0	0	0	0	0	0	0	0.139313	0.169478	0.235118	0.248047	0.248047	0.270766	0.293895	0.332826	0.360813	0.452856	0.496094	0.598692	0.778633	1.19052	1.59621	2.77325
0	0	0	0	0	0	0	0	0	0	0	0	0	0	0.140501	0.179729	0.244771	0.248047	0.248047	0.271637	0.294859	0.333912	0.364439	0.453849	0.496094	0.613076	0.784393	1.20094	1.59953	2.77325
0	0	0	0	0	0	0	0	0	0	0	0	0	0	0.150926	0.186535	0.247781	0.248047	0.248047	0.272608	0.301964	0.33678	0.365892	0.455872	0.496094	0.636804	0.784393	1.20901	1.66537	2.77325
0	0	0	0	0	0	0	0	0	0	0	0	0	0	0.155287	0.190246	0.248047	0.248047	0.248047	0.283914	0.312939	0.338433	0.368015	0.458658	0.496094	0.661518	0.784393	1.20938	1.67233	2.77325
0	0	0	0	0	0	0	0	0	0	0	0	0	0.0514424	0.155849	0.194573	0.248047	0.248047	0.248047	0.291923	0.313863	0.350791	0.396287	0.468734	0.496094	0.681695	0.808921	1.21885	1.71373	2.77325
0	0	0	0	0	0	0	0	0	0	0	0	0	0.0570953	0.157266	0.197089	0.248047	0.248047	0.251296	0.294621	0.318646	0.350791	0.397507	0.475606	0.496094	0.685801	0.815252	1.24023	1.72939	2.77325
0	0	0	0	0	0	0	0	0	0	0	0	0	0.0570953	0.157361	0.197322	0.248047	0.248047	0.253644	0.295483	0.326968	0.350791	0.427552	0.483612	0.504823	0.686349	0.815307	1.24023	1.74838	2.92297
0	0	0	0	0	0	0	0	0	0	0	0	0	0.0674086	0.160262	0.198238	0.248047	0.248047	0.261191	0.295605	0.32985	0.350791	0.441295	0.483614	0.542498	0.712185	0.816389	1.24023	1.75396	3.7207
0	0	0	0	0	0	0	0	0	0	0	0	0	0.0954246	0.161948	0.200222	0.248047	0.248047	0.262703	0.298633	0.330172	0.350791	0.447617	0.491421	0.542586	0.713466	0.83167	1.24023	1.75396	3.7207
0	0	0	0	0	0	0	0	0	0	0	0	0	0.096318	0.171135	0.201211	0.248047	0.248047	0.267742	0.302726	0.337986	0.350791	0.448252	0.496094	0.542882	0.72637	0.872532	1.24023	1.75396	3.7207
0	0	0	0	0	0	0	0	0	0	0	0	0	0.0991953	0.173171	0.207936	0.248047	0.248047	0.268003	0.308701	0.345152	0.354534	0.449846	0.496094	0.54969	0.730426	0.877426	1.24511	1.75396	3.92197
0	0	0	0	0	0	0	0	0	0	0	0	0	0.103529	0.173588	0.211444	0.248047	0.248047	0.269269	0.310829	0.350791	0.368223	0.45252	0.496094	0.55465	0.74104	0.891577	1.2522	1.78757	3.92197
0	0	0	0	0	0	0	0	0	0	0	0	0	0.111522	0.181596	0.213515	0.248047	0.248047	0.270944	0.311088	0.350791	0.368927	0.452772	0.496094	0.55465	0.744141	0.926648	1.2648	1.80295	3.92197
0	0	0	0	0	0	0	0	0	0	0	0	0	0.116311	0.185347	0.220772	0.248047	0.248047	0.273958	0.311547	0.350791	0.369069	0.460065	0.496094	0.564134	0.744141	0.936908	1.2648	1.81315	4.23796
0	0	0	0	0	0	0	0	0	0	0	0	0	0.117271	0.188535	0.220953	0.248047	0.248047	0.27643	0.31965	0.350791	0.369509	0.460585	0.496094	0.565066	0.744141	0.968185	1.26528	1.83965	4.47173
0	0	0	0	0	0	0	0	0	0	0	0	0	0.123715	0.194349	0.220956	0.248047	0.248047	0.276478	0.321138	0.350791	0.377405	0.467755	0.496094	0.574783	0.744141	0.97075	1.28655	1.87152	4.47173
0	0	0	0	0	0	0	0	0	0	0	0	0	0.127789	0.195846	0.223953	0.248047	0.248047	0.279628	0.32579	0.350791	0.394154	0.473221	0.496094	0.590298	0.744141	0.977568	1.33066	1.88907	4.47173
0	0	0	0	0	0	0	0	0	0	0	0	0.0513307	0.136805	0.195939	0.225548	0.248047	0.248047	0.279943	0.325911	0.351648	0.397866	0.476787	0.496094	0.598692	0.744141	0.992188	1.33577	1.91274	4.47173
0	0	0	0	0	0	0	0	0	0	0	0	0.0570953	0.148683	0.198167	0.230319	0.248047	0.248047	0.286207	0.326148	0.354214	0.402024	0.477454	0.496094	0.601417	0.744141	0.992188	1.35018	1.92609	4.47173
0	0	0	0	0	0	0	0	0	0	0	0	0.0570953	0.149884	0.203478	0.238735	0.248047	0.248047	0.287776	0.332017	0.357206	0.407415	0.480435	0.496094	0.602767	0.757466	0.992188	1.36862	1.93731	4.47173
0	0	0	0	0	0	0	0	0	0	0	0	0.0580537	0.152799	0.204621	0.244777	0.248047	0.248047	0.294607	0.341219	0.359847	0.408698	0.480979	0.496094	0.605539	0.769025	0.992188	1.39553	1.98438	4.73399
0	0	0	0	0	0	0	0	0	0	0	0	0.0583602	0.155061	0.208849	0.245157	0.248047	0.248047	0.296238	0.344436	0.368954	0.414117	0.48543	0.496094	0.609713	0.771059	1.0396	1.43968	1.99025	4.99935
0	0	0	0	0	0	0	0	0	0	0	0	0.0611878	0.158667	0.210224	0.246055	0.248047	0.248047	0.299052	0.349999	0.373232	0.414788	0.491113	0.496094	0.618811	0.784393	1.07611	1.44635	1.99148	5.11362
0	0	0	0	0	0	0	0	0	0	0	0	0.0789644	0.162526	0.211955	0.248047	0.248047	0.249489	0.301309	0.350791	0.376453	0.414946	0.491567	0.496094	0.646068	0.784393	1.10025	1.44635	2.02151	5.11362
0	0	0	0	0	0	0	0	0	0	0	0	0.0865958	0.163811	0.213265	0.248047	0.248047	0.250336	0.304316	0.350791	0.377405	0.420635	0.493926	0.496094	0.64897	0.833253	1.1093	1.49138	2.04794	5.17321
0	0	0	0	0	0	0	0	0	0	0	0.0570953	0.10317	0.165868	0.216721	0.248047	0.248047	0.256297	0.31622	0.350791	0.38197	0.428137	0.496094	0.497705	0.661245	0.836693	1.1093	1.50881	2.06121	5.26187
0	0	0	0	0	0	0	0	0	0	0	0.0570953	0.111189	0.16786	0.216848	0.248047	0.248047	0.261762	0.322044	0.350791	0.39174	0.429141	0.496094	0.500943	0.665867	0.845987	1.1093	1.50881	2.08711	5.26187
0	0	0	0	0	0	0	0	0	0	0	0.0647505	0.112232	0.17456	0.218597	0.248047	0.248047	0.268705	0.323157	0.350791	0.391973	0.446197	0.496094	0.501343	0.670753	0.876527	1.11297	1.54631	2.09625	5.26187
0	0	0	0	0	0	0	0	0	0	0	0.0716509	0.116344	0.175121	0.219061	0.248047	0.248047	0.269074	0.32888	0.350791	0.395173	0.450657	0.496094	0.505553	0.674082	0.881106	1.11367	1.55095	2.10475	5.26187
0	0	0	0	0	0	0	0	0	0	0	0.0820169	0.119424	0.176118	0.221388	0.248047	0.248047	0.274289	0.331083	0.350791	0.398851	0.454	0.496094	0.512299	0.68305	0.883525	1.16817	1.58827	2.11931	5.48838
0	0	0	0	0	0	0	0	0	0	0	0.0826206	0.12148	0.177067	0.222528	0.248047	0.248047	0.274845	0.332621	0.350791	0.406383	0.458069	0.496094	0.54969	0.701583	0.893713	1.18554	1.61894	2.17823	5.56806
0	0	0	0	0	0	0	0	0	0	0	0.0910849	0.122367	0.18463	0.225829	0.248047	0.248047	0.277322	0.335621	0.358254	0.410089	0.461578	0.496094	0.549957	0.701583	0.894346	1.19033	1.62767	2.21797	5.7357
0	0	0	0	0	0	0	0	0	0	0	0.0949797	0.122501	0.185951	0.226093	0.248047	0.248047	0.281356	0.339339	0.359656	0.417855	0.46502	0.496094	0.551235	0.707766	0.894346	1.20296	1.62937	2.2186	6.20117
0	0	0	0	0	0	0	0	0	0	0	0.0951125	0.12356	0.18712	0.227528	0.248047	0.248047	0.281708	0.345967	0.361766	0.417948	0.469851	0.496094	0.552584	0.744141	0.894346	1.20372	1.68379	2.23242	6.20117
0	0	0	0	0	0	0	0	0	0	0	0.0979588	0.125362	0.19095	0.231541	0.248047	0.248047	0.286076	0.345968	0.365858	0.42758	0.47	0.496094	0.55465	0.744141	0.894346	1.22461	1.68396	2.2726	6.32398
0	0	0	0	0	0	0	0	0	0	0	0.101178	0.129392	0.193041	0.237424	0.248047	0.248047	0.290069	0.348853	0.365958	0.427748	0.478642	0.496094	0.55465	0.744141	0.894346	1.23428	1.69695	2.27406	6.43437
0	0	0	0	0	0	0	0	0	0	0	0.102401	0.133325	0.194189	0.237822	0.248047	0.248047	0.292496	0.349645	0.377405	0.427869	0.484262	0.496094	0.55465	0.744141	0.90729	1.23739	1.71221	2.28487	6.80703
0	0	0	0	0	0	0	0	0	0	0	0.102747	0.137528	0.195939	0.241017	0.248047	0.248047	0.294314	0.350791	0.377405	0.432655	0.489868	0.496094	0.55465	0.744141	0.912806	1.24023	1.71386	2.29121	7.23175
0	0	0	0	0	0	0	0	0	0	0	0.103362	0.138288	0.196379	0.244856	0.248047	0.248047	0.294748	0.350791	0.379777	0.443895	0.496094	0.496094	0.555112	0.744141	0.96312	1.24023	1.73633	2.33107	7.23175
0	0	0	0	0	0	0	0	0	0	0	0.109878	0.14157	0.199033	0.246331	0.248047	0.248527	0.294882	0.350791	0.38469	0.444542	0.496094	0.496094	0.558434	0.744141	0.97075	1.24023	1.75041	2.34007	7.54405
0	0	0	0	0	0	0	0	0	0	0	0.110222	0.143712	0.206484	0.248047	0.248047	0.251891	0.294916	0.350791	0.387534	0.447212	0.496094	0.496094	0.576522	0.744141	0.986165	1.24023	1.75396	2.35222	7.5858
0	0	0	0	0	0	0	0	0	0	0	0.110501	0.144598	0.2072	0.248047	0.248047	0.253253	0.295956	0.350791	0.388099	0.455044	0.496094	0.496094	0.58564	0.744141	0.992188	1.24405	1.75396	2.47135	8.76978
0	0	0	0	0	0	0	0	0	0	0	0.111612	0.144806	0.21043	0.248047	0.248047	0.253718	0.297664	0.350791	0.389638	0.45859	0.496094	0.496094	0.591351	0.748852	0.992188	1.24616	1.75396	2.48047	9.68654
0	0	0	0	0	0	0	0	0	0	0	0.11211	0.146454	0.21128	0.248047	0.248047	0.25638	0.297713	0.350791	0.393292	0.460567	0.496094	0.496094	0.596699	0.757388	0.992188	1.25613	1.75396	2.48047	9.99909
0	0	0	0	0	0	0	0	0	0	0	0.11303	0.1488	0.213132	0.248047	0.248047	0.258621	0.299301	0.350791	0.393708	0.462377	0.496094	0.496094	0.600623	0.765777	0.992188	1.25784	1.75396	2.48047	9.99909
0	0	0	0	0	0	0	0	0	0	0	0.116741	0.149194	0.215483	0.248047	0.248047	0.26017	0.29943	0.350791	0.399216	0.480407	0.496094	0.496094	0.609665	0.783488	0.992188	1.25897	1.75396	2.49284	10.2272
0	0	0	0	0	0	0	0	0	0	0	0.118507	0.151604	0.218967	0.248047	0.248047	0.261703	0.302508	0.350791	0.39987	0.481722	0.496094	0.496094	0.612376	0.784393	1.01486	1.25954	1.75396	2.49284	11.2308
0	0	0	0	0	0	0	0	0	0	0	0.122672	0.155504	0.22241	0.248047	0.248047	0.262951	0.307962	0.350791	0.405741	0.485075	0.496094	0.496094	0.630378	0.784393	1.01633	1.2648	1.75396	2.5538	11.7003
0	0	0	0	0	0	0	0	0	0	0.0240778	0.124526	0.161856	0.223413	0.248047	0.248047	0.263681	0.311812	0.350791	0.415393	0.489772	0.496094	0.497016	0.645712	0.784393	1.01812	1.2648	1.76233	2.5538	12.769
0	0	0	0	0	0	0	0	0	0	0.0319039	0.126076	0.164979	0.225593	0.248047	0.248047	0.267718	0.313384	0.350791	0.422647	0.490902	0.496094	0.497084	0.656966	0.784393	1.02272	1.2648	1.77044	2.5538	12.9484
0	0	0	0	0	0	0	0	0	0	0.0325976	0.132878	0.169908	0.226383	0.248047	0.248047	0.270292	0.318569	0.353543	0.426143	0.491936	0.496094	0.498444	0.671488	0.796373	1.02272	1.28755	1.77788	2.56296	13.4152
0	0	0	0	0	0	0	0	0	0	0.0471632	0.133609	0.173139	0.229897	0.248047	0.248047	0.27959	0.320966	0.35719	0.43487	0.495008	0.496094	0.506309	0.69099	0.8217	1.0316	1.31463	1.77938	2.57177	13.8662
0	0	0	0	0	0	0	0	0	0	0.0557835	0.135325	0.173902	0.230468	0.248047	0.248047	0.280584	0.322461	0.360272	0.436509	0.496094	0.496094	0.550056	0.693589	0.822779	1.03896	1.31529	1.78002	2.57218	16.3127
0	0	0	0	0	0	0	0	0	0	0.0570953	0.136065	0.187828	0.230764	0.248047	0.248047	0.284889	0.323462	0.360691	0.437016	0.496094	0.496094	0.55465	0.696041	0.844473	1.05237	1.32459	1.78869	2.60439	17.5396
0	0	0	0	0	0	0	0	0	0	0.0570953	0.136427	0.188902	0.233662	0.248047	0.248047	0.288305	0.324367	0.374469	0.441339	0.496094	0.496094	0.55465	0.701583	0.882454	1.05237	1.33577	1.78869	2.72003	18.6448
0	0	0	0	0	0	0	0	0	0	0.0570953	0.136953	0.18894	0.234197	0.248047	0.248047	0.288811	0.325039	0.374684	0.444146	0.496094	0.496094	0.55465	0.704148	0.883284	1.05237	1.33577	1.78869	2.72852
0	0	0	0	0	0	0	0	0	0	0.0593901	0.139972	0.190924	0.234486	0.248047	0.248047	0.289432	0.326163	0.377317	0.444672	0.496094	0.496094	0.55465	0.70505	0.890703	1.09067	1.34861	1.79169	2.77325
0	0	0	0	0	0	0	0	0	0	0.0631474	0.142208	0.192025	0.236059	0.248047	0.248047	0.289809	0.329254	0.377405	0.4494	0.496094	0.496094	0.55465	0.727226	0.894346	1.09406	1.38067	1.80581	2.77325
0	0	0	0	0	0	0	0	0	0	0.0718739	0.143599	0.193465	0.236596	0.248047	0.248047	0.290141	0.332224	0.377405	0.450011	0.496094	0.496816	0.55465	0.736335	0.894346	1.09581	1.39013	1.84444	2.77325
0	0	0	0	0	0	0	0	0	0	0.0781729	0.146878	0.195939	0.237167	0.248047	0.248047	0.290613	0.33286	0.377415	0.453214	0.496094	0.499001	0.554893	0.744141	0.894346	1.10746	1.39299	1.858	2.77325
0	0	0	0	0	0	0	0	0	0	0.0836669	0.149778	0.199604	0.239596	0.248047	0.248047	0.290791	0.340738	0.378149	0.455418	0.496094	0.501309	0.56586	0.744141	0.897963	1.1093	1.40317	1.864	2.77325
0	0	0	0	0	0	0	0	0	0	0.0837397	0.153079	0.20244	0.240045	0.248047	0.248047	0.292678	0.340829	0.378157	0.459438	0.496094	0.505445	0.573226	0.744141	0.923796	1.1093	1.4361	1.90535	2.8216
0	0	0	0	0	0	0	0	0	0	0.0878788	0.153532	0.205088	0.241575	0.248047	0.248047	0.294211	0.348158	0.379545	0.463636	0.496094	0.512687	0.576074	0.744141	0.935945	1.14427	1.44635	1.91989	3.15712
0	0	0	0	0	0	0	0	0	0	0.0906973	0.159398	0.207477	0.241745	0.248047	0.248047	0.29488	0.350667	0.382318	0.467054	0.496094	0.521222	0.580612	0.744141	0.954154	1.15499	1.44635	1.93731	3.22461
0	0	0	0	0	0	0	0	0	0	0.093426	0.160025	0.208929	0.241818	0.248047	0.260394	0.298202	0.350791	0.383796	0.467493	0.496094	0.523845	0.589815	0.744141	0.976914	1.17103	1.44635	1.93731	3.22461
0	0	0	0	0	0	0	0	0	0	0.096585	0.160467	0.210785	0.242551	0.248047	0.261144	0.299404	0.350791	0.386187	0.472013	0.496094	0.52722	0.593495	0.744141	0.987398	1.17157	1.44635	1.94572	3.22461
0	0	0	0	0	0	0	0	0	0	0.0975024	0.164367	0.215404	0.244019	0.248047	0.263372	0.299744	0.350791	0.391337	0.473618	0.496094	0.53239	0.594484	0.744141	0.992188	1.18298	1.44635	1.98333	3.30936
0	0	0	0	0	0	0	0	0	0	0.103122	0.164432	0.215736	0.246445	0.248047	0.263878	0.301964	0.350791	0.393701	0.479032	0.496094	0.533152	0.607343	0.744141	0.992188	1.19303	1.48567	1.98989	3.3279
0	0	0	0	0	0	0	0	0	0	0.108397	0.164723	0.216933	0.246537	0.248047	0.264403	0.301964	0.350791	0.396392	0.486086	0.496094	0.534498	0.614327	0.744141	0.992188	1.19695	1.48828	1.99262	3.47266
0	0	0	0	0	0	0	0	0	0	0.119046	0.165408	0.217083	0.246904	0.248047	0.264867	0.308265	0.350791	0.400154	0.49476	0.496094	0.545763	0.617713	0.744141	1.00043	1.20232	1.48828	2.03093	3.47266
0	0	0	0	0	0	0	0	0	0	0.119143	0.166075	0.219002	0.248047	0.248047	0.26582	0.309312	0.350791	0.402672	0.496094	0.496094	0.550727	0.631134	0.744141	1.00801	1.21788	1.48828	2.03959	3.55149
0	0	0	0	0	0	0	0	0	0	0.120262	0.168195	0.219701	0.248047	0.248047	0.26619	0.310509	0.350791	0.407622	0.496094	0.496094	0.551304	0.632489	0.747935	1.00831	1.22195	1.50881	2.05967	3.68748
0	0	0	0	0	0	0	0	0	0	0.121777	0.170373	0.223315	0.248047	0.248047	0.266715	0.310727	0.350791	0.412101	0.496094	0.496094	0.552262	0.632851	0.768652	1.00938	1.22592	1.50881	2.06853	3.70568
0	0	0	0	0	0	0	0	0	0	0.122595	0.170633	0.226326	0.248047	0.248047	0.269039	0.311315	0.350791	0.412124	0.496094	0.496094	0.55465	0.645712	0.784393	1.01379	1.22959	1.50881	2.06938	3.7207
0	0	0	0	0	0	0	0	0	0	0.125598	0.170897	0.226812	0.248047	0.248047	0.274881	0.315466	0.350791	0.413827	0.496094	0.496094	0.55465	0.655761	0.791395	1.02272	1.23194	1.51706	2.11931	3.75363
0	0	0	0	0	0	0	0	0	0.0160413	0.128245	0.179334	0.228264	0.248047	0.248047	0.275553	0.316547	0.350791	0.414869	0.496094	0.496094	0.55465	0.669742	0.795723	1.02272	1.23988	1.52176	2.13378	3.92197
0	0	0	0	0	0	0	0	0	0.0220081	0.129859	0.18344	0.228793	0.248047	0.248047	0.276048	0.321587	0.350791	0.416636	0.496094	0.496094	0.55465	0.679101	0.807596	1.02272	1.24023	1.55998	2.15754	4.06827
0	0	0	0	0	0	0	0	0	0.0361079	0.130076	0.18391	0.230291	0.248047	0.248047	0.282318	0.325127	0.350791	0.426025	0.496094	0.496094	0.55465	0.689298	0.810726	1.03876	1.24023	1.58827	2.1713	4.06827
0	0	0	0	0	0	0	0	0	0.0362584	0.131417	0.184367	0.230749	0.248047	0.248047	0.282418	0.326981	0.350791	0.426127	0.496094	0.496094	0.577234	0.690281	0.828058	1.03978	1.24023	1.58827	2.17306	4.06827
0	0	0	0	0	0	0	0	0	0.0401958	0.133716	0.184374	0.234564	0.248047	0.248047	0.284696	0.328207	0.351791	0.426342	0.496094	0.496926	0.591125	0.693429	0.83438	1.04345	1.24023	1.58827	2.23242	4.10433
0	0	0	0	0	0	0	0	0	0.0570953	0.134327	0.18642	0.234904	0.248047	0.248047	0.284822	0.330706	0.353376	0.435224	0.496094	0.497818	0.594484	0.695741	0.845204	1.04795	1.24023	1.58827	2.23242	4.14216
0	0	0	0	0	0	0	0	0	0.0607477	0.134684	0.190377	0.235171	0.248047	0.248047	0.285592	0.331847	0.357575	0.435666	0.496094	0.501782	0.598297	0.697875	0.88582	1.05237	1.24023	1.59338	2.24616	4.2168
0	0	0	0	0	0	0	0	0	0.0616787	0.136728	0.19166	0.238193	0.248047	0.248047	0.285767	0.335173	0.35808	0.439175	0.496094	0.503742	0.600895	0.701583	0.893132	1.05237	1.24023	1.59339	2.25323	4.26756
0	0	0	0	0	0	0	0	0	0.062402	0.140437	0.192543	0.239024	0.248047	0.248047	0.287366	0.339233	0.360876	0.439427	0.496094	0.508248	0.601279	0.706765	0.894346	1.08447	1.24849	1.59695	2.27247	4.26756
0	0	0	0	0	0	0	0	0	0.0641749	0.140911	0.193976	0.239242	0.248047	0.248047	0.287793	0.343971	0.363598	0.443869	0.496094	0.515529	0.615021	0.732704	0.894346	1.10915	1.25096	1.60403	2.28688	4.26756
0	0	0	0	0	0	0	0	0	0.067352	0.141514	0.195436	0.240802	0.248047	0.248047	0.288763	0.346273	0.370566	0.446891	0.496094	0.515784	0.61831	0.732825	0.894346	1.1093	1.2648	1.60622	2.29038	4.45235
0	0	0	0	0	0	0	0	0	0.0678698	0.142247	0.195939	0.242405	0.248047	0.24972	0.29234	0.346495	0.37235	0.447638	0.496094	0.531222	0.618383	0.738788	0.894346	1.1093	1.2648	1.60958	2.30616	4.47173
0	0	0	0	0	0	0	0	0	0.0771507	0.144595	0.196825	0.242577	0.248047	0.250586	0.295008	0.349319	0.372623	0.447749	0.496094	0.536015	0.629397	0.744141	0.897055	1.1093	1.2648	1.61518	2.31499	4.47173
0	0	0	0	0	0	0	0	0	0.0783966	0.146995	0.19848	0.243388	0.248047	0.254177	0.295641	0.350667	0.377405	0.457906	0.496094	0.536344	0.634505	0.744141	0.900232	1.1093	1.2648	1.62788	2.34007	4.49603
0	0	0	0	0	0	0	0	0	0.0846077	0.148162	0.199413	0.243402	0.248047	0.25511	0.300941	0.350791	0.377405	0.459793	0.496094	0.541095	0.639323	0.744141	0.903778	1.1093	1.2648	1.63818	2.34007	4.56029
0	0	0	0	0	0	0	0	0	0.0863418	0.148193	0.199454	0.244206	0.248047	0.257988	0.301182	0.350791	0.377466	0.467729	0.496094	0.550871	0.644808	0.744141	0.906952	1.11114	1.27523	1.65469	2.34488	4.57887
0	0	0	0	0	0	0	0	0	0.0865805	0.149091	0.202853	0.246378	0.248047	0.258034	0.301641	0.350791	0.383701	0.468147	0.496094	0.551017	0.644895	0.744141	0.922488	1.12397	1.28379	1.65845	2.3824	4.73893
0	0	0	0	0	0	0	0	0	0.0872114	0.153451	0.203578	0.246678	0.248047	0.260434	0.301964	0.350791	0.386041	0.47421	0.496094	0.55465	0.645712	0.744141	0.941307	1.12972	1.28717	1.66953	2.38445	4.76482
0	0	0	0	0	0	0	0	0	0.0873185	0.154045	0.203727	0.247793	0.248047	0.26446	0.302262	0.350791	0.387799	0.474876	0.496094	0.55465	0.647159	0.744141	0.96324	1.14107	1.28948	1.677	2.41821	4.87335
0	0	0	0	0	0	0	0	0	0.0878938	0.154542	0.20625	0.248047	0.248047	0.270258	0.304677	0.350791	0.393331	0.478187	0.496094	0.55465	0.650618	0.744141	0.966424	1.14124	1.30105	1.70569	2.46993	4.87335
0	0	0	0	0	0	0	0	0	0.0880588	0.156254	0.207088	0.248047	0.248047	0.273942	0.305004	0.350791	0.393983	0.480443	0.496094	0.55465	0.657509	0.744141	0.984485	1.14235	1.30928	1.71886	2.4755	4.87335
0	0	0	0	0	0	0	0	0	0.0939614	0.157177	0.208261	0.248047	0.248047	0.274294	0.309791	0.350791	0.394894	0.481014	0.496094	0.55465	0.666759	0.744141	0.987847	1.15506	1.31003	1.71946	2.48047	4.88688
0	0	0	0	0	0	0	0	0	0.0946474	0.158522	0.208342	0.248047	0.248047	0.275765	0.31056	0.351507	0.399733	0.482235	0.496094	0.55465	0.666798	0.744141	0.991393	1.15564	1.33577	1.72102	2.48047	4.91649
0	0	0	0	0	0	0	0	0	0.0948269	0.158731	0.211243	0.248047	0.248047	0.276979	0.313347	0.353994	0.400845	0.485911	0.496094	0.55465	0.671067	0.744141	0.992188	1.15575	1.33577	1.7299	2.48047	4.92359
0	0	0	0	0	0	0	0	0	0.0990413	0.16007	0.215425	0.248047	0.248047	0.2772	0.317767	0.357674	0.401649	0.487658	0.496094	0.55465	0.672778	0.744141	0.992188	1.16024	1.33577	1.73633	2.48482	5.00658
0	0	0	0	0	0	0	0	0	0.101853	0.162598	0.216279	0.248047	0.248047	0.277454	0.320503	0.361379	0.412193	0.496094	0.498423	0.55465	0.673642	0.744141	0.992188	1.16152	1.33577	1.73633	2.49284	5.02394
0	0	0	0	0	0	0	0	0	0.105997	0.163548	0.218617	0.248047	0.248047	0.281345	0.320552	0.361918	0.413243	0.496094	0.501947	0.55465	0.675786	0.744141	0.992188	1.18248	1.33698	1.74408	2.53474	5.02843
0	0	0	0	0	0	0	0	0	0.106689	0.164218	0.21926	0.248047	0.248047	0.28294	0.322024	0.366772	0.414468	0.496094	0.515011	0.558993	0.677903	0.749532	0.992188	1.1912	1.38933	1.75396	2.5538	5.06523
0	0	0	0	0	0	0	0	0	0.107481	0.164514	0.222777	0.248047	0.248047	0.284554	0.323302	0.368927	0.420517	0.496094	0.52133	0.565371	0.693579	0.773983	1.00043	1.20625	1.40147	1.75396	2.5538	5.0895
0	0	0	0	0	0	0	0	0.0207627	0.107894	0.165374	0.224989	0.248047	0.248047	0.285429	0.324304	0.370798	0.426206	0.496094	0.525588	0.581017	0.701583	0.777681	1.01082	1.21006	1.40317	1.75396	2.5538	5.09569
0	0	0	0	0	0	0	0	0.0253776	0.111629	0.167964	0.225487	0.248047	0.248047	0.285916	0.326299	0.371777	0.427424	0.496094	0.526923	0.581928	0.701583	0.784393	1.02272	1.21137	1.40407	1.75396	2.5538	5.11362
0	0	0	0	0	0	0	0	0.0308716	0.118253	0.168239	0.226065	0.248047	0.248047	0.286408	0.326689	0.375457	0.43388	0.496094	0.530695	0.584326	0.701583	0.784393	1.02272	1.21765	1.41083	1.75396	2.5538	5.26187
0	0	0	0	0	0	0	0	0.0396584	0.119022	0.169325	0.226768	0.248047	0.248047	0.286478	0.328155	0.377405	0.435117	0.496094	0.535613	0.585659	0.706094	0.789482	1.02272	1.21857	1.4461	1.75396	2.56948	5.29762
0	0	0	0	0	0	0	0	0.0464083	0.119257	0.171077	0.228299	0.248047	0.248047	0.287324	0.32828	0.378577	0.443321	0.496094	0.543399	0.586113	0.712332	0.808358	1.02272	1.2186	1.44635	1.75396	2.62709	5.40669
0	0	0	0	0	0	0	0	0.0474574	0.120308	0.171499	0.233795	0.248047	0.248047	0.290438	0.338692	0.38041	0.446096	0.496094	0.544293	0.592851	0.726241	0.813633	1.02636	1.23167	1.44635	1.75396	2.71339	5.44009
0	0	0	0	0	0	0	0	0.0486856	0.122405	0.172913	0.234866	0.248047	0.248047	0.29049	0.340339	0.383739	0.45166	0.496094	0.549328	0.594484	0.734029	0.833466	1.02639	1.2321	1.44635	1.75396	2.72852	5.44009
0	0	0	0	0	0	0	0	0.0570953	0.123856	0.174627	0.235282	0.248047	0.248047	0.294235	0.342602	0.383976	0.452511	0.496094	0.553558	0.599195	0.734283	0.837748	1.02807	1.23337	1.44635	1.75396	2.72852	5.50753
0	0	0	0	0	0	0	0	0.0586871	0.124612	0.174891	0.236518	0.248047	0.248047	0.294782	0.343865	0.384993	0.454599	0.496094	0.55465	0.600125	0.740141	0.853156	1.03573	1.24023	1.44635	1.78869	2.72852	5.50753
0	0	0	0	0	0	0	0	0.0605769	0.125511	0.178038	0.23652	0.248047	0.248047	0.295045	0.34594	0.385193	0.455855	0.496094	0.55465	0.604538	0.741232	0.853749	1.04342	1.24023	1.44635	1.78869	2.73977	5.57416
0	0	0	0	0	0	0	0	0.0610952	0.126821	0.178339	0.237224	0.248047	0.248047	0.299073	0.348134	0.38622	0.456102	0.496094	0.55465	0.606634	0.744141	0.868563	1.04866	1.24023	1.46244	1.78972	2.73977	5.75197
0	0	0	0	0	0	0	0	0.0664082	0.126903	0.17881	0.237715	0.248047	0.248047	0.299087	0.349329	0.386424	0.457509	0.496094	0.55465	0.612359	0.744141	0.880498	1.05237	1.24023	1.47464	1.85187	2.77325	5.81192
0	0	0	0	0	0	0	0	0.0675081	0.128887	0.178863	0.239069	0.248047	0.248047	0.29947	0.34959	0.390303	0.464608	0.496094	0.55465	0.620505	0.744141	0.882296	1.05237	1.24023	1.48016	1.8596	2.77325	6.02358
0	0	0	0	0	0	0	0	0.0694466	0.129744	0.182045	0.241902	0.248047	0.248047	0.300024	0.350124	0.392641	0.466019	0.496094	0.55465	0.623961	0.744141	0.885873	1.05237	1.24023	1.48823	1.86922	2.77325	6.08094
0	0	0	0	0	0	0	0	0.0714584	0.131325	0.182406	0.242702	0.248047	0.248047	0.301964	0.350667	0.395888	0.470116	0.496094	0.55465	0.62605	0.744141	0.891552	1.05523	1.24023	1.48828	1.88229	2.77325	6.12631
0	0	0	0	0	0	0	0	0.0750539	0.134103	0.183911	0.246784	0.248047	0.248047	0.301964	0.350791	0.396451	0.470613	0.496094	0.55465	0.63681	0.744141	0.894346	1.06133	1.24023	1.50414	1.89709	2.77325	6.1614
0	0	0	0	0	0	0	0	0.075906	0.136042	0.184715	0.248047	0.248047	0.248047	0.302249	0.350791	0.39676	0.4734	0.496094	0.55465	0.638702	0.744141	0.894346	1.08142	1.24023	1.50881	1.90755	2.8549	6.28005
0	0	0	0	0	0	0	0	0.0770776	0.136151	0.184817	0.248047	0.248047	0.248047	0.303114	0.350791	0.401888	0.482039	0.496094	0.55465	0.645712	0.744141	0.894346	1.08177	1.24023	1.51273	1.93352	2.97454	6.3531
0	0	0	0	0	0	0	0	0.0771886	0.136825	0.185184	0.248047	0.248047	0.248047	0.304874	0.350791	0.408281	0.482863	0.496094	0.55465	0.649226	0.744141	0.894346	1.08261	1.24023	1.51632	1.93731	2.97656	6.45574
0	0	0	0	0	0	0	0	0.0777876	0.137702	0.185352	0.248047	0.248047	0.248047	0.307161	0.350791	0.410053	0.488506	0.496094	0.55465	0.650631	0.744141	0.910388	1.08658	1.24301	1.52322	1.94126	2.97656	6.68255
0	0	0	0	0	0	0	0	0.0780076	0.14012	0.19016	0.248047	0.248047	0.248047	0.307618	0.350791	0.410871	0.494709	0.496094	0.557882	0.6507	0.744141	0.915106	1.10224	1.24628	1.52745	1.9462	2.99716	7.02021
0	0	0	0	0	0	0	0	0.0785886	0.142185	0.190539	0.248047	0.248047	0.248047	0.307707	0.350791	0.411287	0.496094	0.496094	0.564652	0.663503	0.744141	0.916828	1.1093	1.2648	1.53752	1.98438	3.22461	7.02021
0	0	0	0	0	0	0	0	0.0790056	0.144926	0.19315	0.248047	0.248047	0.249364	0.308108	0.350791	0.413707	0.496094	0.496094	0.567331	0.670445	0.744141	0.934824	1.1093	1.2648	1.56127	1.98471	3.23414	7.07431
0	0	0	0	0	0	0	0	0.0793227	0.146528	0.195939	0.248047	0.248047	0.249921	0.308359	0.350791	0.421142	0.496094	0.496094	0.568529	0.672363	0.744141	0.936224	1.1093	1.2648	1.5681	1.98982	3.23414	7.23175
0	0	0	0	0	0	0	0	0.0795525	0.14709	0.197364	0.248047	0.248047	0.253014	0.308834	0.350791	0.421576	0.496094	0.496094	0.568934	0.673642	0.744141	0.937282	1.1093	1.2648	1.56879	1.99479	3.30936	7.47852
0	0	0	0	0	0	0	0	0.0879819	0.14827	0.200406	0.248047	0.248047	0.253144	0.313328	0.350791	0.428548	0.496094	0.50884	0.569542	0.684924	0.744141	0.949599	1.11416	1.2648	1.57698	1.99982	3.30936	7.5018
0	0	0	0	0	0	0	0	0.0880203	0.152016	0.201563	0.248047	0.248047	0.256123	0.316081	0.350791	0.432859	0.496094	0.516286	0.571991	0.6879	0.744141	0.9512	1.1196	1.2648	1.58827	1.99982	3.3279	7.54405
0	0	0	0	0	0	0	0	0.0887296	0.152965	0.201676	0.248047	0.248047	0.258413	0.321756	0.350791	0.434764	0.496094	0.517322	0.574753	0.692689	0.744141	0.951752	1.12494	1.2648	1.58827	2.0082	3.45489	8.27897
0	0	0	0	0	0	0	0	0.0898308	0.155626	0.207853	0.248047	0.248047	0.260591	0.323457	0.353587	0.454557	0.496094	0.522295	0.589088	0.696894	0.75262	0.956923	1.13482	1.2648	1.58827	2.03089	3.45489	8.5243
0	0	0	0	0	0	0	0	0.0907988	0.155854	0.210497	0.248047	0.248047	0.262104	0.32481	0.359052	0.472066	0.496094	0.522356	0.594376	0.697147	0.777488	0.968246	1.14546	1.2648	1.58827	2.03582	3.55149	8.73815
0	0	0	0	0	0	0	0	0.0918719	0.15706	0.211972	0.248047	0.248047	0.263637	0.326741	0.35955	0.474742	0.496094	0.525461	0.594484	0.701583	0.784393	0.980282	1.14565	1.26574	1.58827	2.04133	3.57152	8.89171
0	0	0	0	0	0	0	0	0.0937501	0.15975	0.212809	0.248047	0.248047	0.264075	0.326799	0.36119	0.475832	0.496094	0.532335	0.60324	0.701583	0.784393	0.982123	1.1546	1.27303	1.59028	2.0459	3.68748	8.96407
0	0	0	0	0	0	0	0	0.0941272	0.160571	0.21323	0.248047	0.248047	0.264655	0.328788	0.364845	0.480348	0.496094	0.533746	0.604497	0.703116	0.784393	0.992188	1.15738	1.28005	1.59897	2.04657	3.68748	9.18109
0	0	0	0	0	0	0	0.028583	0.0950486	0.164331	0.214169	0.248047	0.248047	0.265242	0.34117	0.366787	0.481915	0.496094	0.537477	0.607508	0.703214	0.784393	0.992188	1.15991	1.2982	1.60693	2.07349	3.7207	9.26115
0	0	0	0	0	0	0	0.0331614	0.0989126	0.164938	0.214499	0.248047	0.248047	0.265425	0.342151	0.36859	0.482307	0.496094	0.539586	0.610871	0.712188	0.784393	0.992188	1.16413	1.31217	1.6138	2.10475	3.75363	9.3767
0	0	0	0	0	0	0	0.0350548	0.0993953	0.166893	0.217303	0.248047	0.248047	0.267926	0.342198	0.370687	0.48739	0.496094	0.546107	0.615017	0.716552	0.784393	0.992188	1.16426	1.31484	1.61668	2.11615	3.77814	9.92188
0	0	0	0	0	0	0	0.0360842	0.0998188	0.168549	0.220473	0.248047	0.248047	0.267993	0.345337	0.371621	0.489805	0.496094	0.549062	0.615834	0.730509	0.784393	0.992188	1.18179	1.31591	1.62444	2.11931	3.78627	9.99909
0	0	0	0	0	0	0	0.0366054	0.102196	0.168972	0.22195	0.248047	0.248047	0.268367	0.346299	0.371902	0.491679	0.496094	0.55465	0.61595	0.742896	0.784393	0.992188	1.18237	1.33577	1.63069	2.13378	3.82882	10.6516
0	0	0	0	0	0	0	0.0379959	0.105073	0.170105	0.223749	0.248047	0.248047	0.276288	0.34743	0.374596	0.493605	0.496094	0.55465	0.618131	0.744029	0.784393	1.00043	1.18307	1.33577	1.63073	2.13378	3.8587	10.6775
0	0	0	0	0	0	0	0.0381448	0.108283	0.171937	0.225615	0.248047	0.248047	0.282101	0.350667	0.377405	0.493995	0.496094	0.55465	0.621899	0.744141	0.795867	1.00796	1.1834	1.33577	1.63291	2.13378	3.87462	10.6775
0	0	0	0	0	0	0	0.0456302	0.110381	0.173435	0.226384	0.248047	0.248047	0.283085	0.350791	0.384377	0.496094	0.496094	0.55465	0.624609	0.744141	0.798268	1.02035	1.18729	1.33577	1.65806	2.13378	3.87462	10.9506
0	0	0	0	0	0	0	0.0462687	0.110522	0.176195	0.228123	0.248047	0.248047	0.28606	0.350791	0.384825	0.496094	0.496094	0.55465	0.625248	0.744141	0.83427	1.02272	1.18905	1.33577	1.66395	2.15099	3.92197	11.9707
0	0	0	0	0	0	0	0.0509303	0.112729	0.176384	0.228232	0.248047	0.248047	0.286774	0.350791	0.386883	0.496094	0.496094	0.55465	0.62734	0.744141	0.837649	1.02272	1.19164	1.33577	1.6808	2.16425	3.92809	12.7376
0	0	0	0	0	0	0	0.0509416	0.115877	0.177744	0.22835	0.248047	0.248047	0.287157	0.350791	0.392878	0.496094	0.496094	0.55465	0.628217	0.744141	0.83869	1.02272	1.19391	1.33605	1.68414	2.16843	3.99964	12.769
0	0	0	0	0	0	0	0.0522388	0.115889	0.178201	0.228527	0.248047	0.248047	0.290434	0.350791	0.393635	0.496094	0.496094	0.55465	0.635193	0.744141	0.84242	1.0235	1.20073	1.34872	1.69369	2.1712	4.06827	13.0219
0	0	0	0	0	0	0	0.060858	0.119064	0.178225	0.229682	0.248047	0.248047	0.294989	0.350791	0.397186	0.496094	0.496094	0.55465	0.638386	0.744141	0.881241	1.02354	1.21226	1.35077	1.71071	2.20174	4.06827	13.1066
0	0	0	0	0	0	0	0.0609418	0.120681	0.178851	0.235714	0.248047	0.248047	0.29691	0.350791	0.399461	0.496094	0.496094	0.55465	0.643505	0.744141	0.884522	1.03833	1.21349	1.35124	1.73633	2.21526	4.06827	13.4884
0	0	0	0	0	0	0	0.0627147	0.121636	0.179531	0.24029	0.248047	0.248047	0.30078	0.350791	0.401745	0.496094	0.496094	0.55465	0.645712	0.744141	0.885577	1.03954	1.21807	1.39064	1.73633	2.23242	4.06827	13.8773
0	0	0	0	0	0	0	0.0627741	0.121738	0.180586	0.240498	0.248047	0.248047	0.301125	0.350791	0.402383	0.496094	0.496094	0.55465	0.654637	0.744141	0.889694	1.04602	1.24014	1.39362	1.73633	2.23242	4.13085	15.0493
0	0	0	0	0	0	0	0.0653358	0.122659	0.181755	0.242048	0.248047	0.248339	0.301381	0.350791	0.402865	0.496094	0.496094	0.55465	0.659468	0.744141	0.893737	1.04652	1.24023	1.40026	1.73633	2.23242	4.26756	15.3328
0	0	0	0	0	0	0	0.0659325	0.125688	0.182102	0.242813	0.248047	0.250148	0.301964	0.350791	0.403547	0.496094	0.496094	0.55465	0.661617	0.744141	0.894346	1.04723	1.24023	1.40317	1.73633	2.23242	4.29301	15.4865
0	0	0	0	0	0	0	0.0664738	0.126922	0.182313	0.242827	0.248047	0.251878	0.30209	0.350791	0.403674	0.496094	0.496094	0.55465	0.666449	0.744141	0.894346	1.05237	1.24023	1.40387	1.73633	2.23518	4.33905	16.3955
0	0	0	0	0	0	0	0.0677313	0.127137	0.188227	0.242919	0.248047	0.253735	0.307515	0.350791	0.410124	0.496094	0.496094	0.55465	0.673642	0.744141	0.894346	1.05237	1.24023	1.42055	1.73633	2.27525	4.34103	17.4763
0	0	0	0	0	0	0	0.0693478	0.127252	0.189342	0.244823	0.248047	0.254531	0.308388	0.350791	0.417188	0.496094	0.496094	0.55465	0.701583	0.744141	0.894346	1.05702	1.24023	1.43232	1.73633	2.28175	4.3884	17.7793
0	0	0	0	0	0	0	0.07261	0.127288	0.189475	0.248047	0.248047	0.255556	0.309052	0.350791	0.417342	0.496094	0.496094	0.55465	0.701583	0.744141	0.894402	1.0602	1.24023	1.43847	1.74555	2.28688	4.4078	18.1685
0	0	0	0	0	0	0	0.0734262	0.129983	0.193551	0.248047	0.248047	0.255919	0.309705	0.350791	0.431919	0.496094	0.496094	0.558157	0.701583	0.744141	0.894699	1.06579	1.24023	1.44635	1.74559	2.29331	4.43478
0	0	0	0	0	0	0	0.080568	0.130364	0.195939	0.248047	0.248047	0.257379	0.31146	0.350791	0.435612	0.496094	0.496094	0.562002	0.701583	0.744141	0.902119	1.06589	1.24023	1.44635	1.75396	2.34007	4.4486
0	0	0	0	0	0	0	0.0824715	0.131268	0.195939	0.248047	0.248047	0.260282	0.311703	0.350791	0.435681	0.496094	0.496094	0.565975	0.701583	0.744141	0.910685	1.08473	1.24023	1.44635	1.75396	2.34007	4.47173
0	0	0	0	0	0	0	0.0831635	0.133423	0.197776	0.248047	0.248047	0.260796	0.312135	0.350791	0.435852	0.496094	0.496094	0.584146	0.701583	0.744141	0.911935	1.09147	1.24023	1.4503	1.75396	2.34821	4.49188
0	0	0	0	0	0	0	0.0832361	0.136052	0.198736	0.248047	0.248047	0.261126	0.313837	0.350791	0.437401	0.496094	0.496094	0.587098	0.701583	0.744141	0.915504	1.09782	1.24023	1.45057	1.75396	2.35614	4.53236
0	0	0	0	0	0	0	0.084374	0.138118	0.198779	0.248047	0.248047	0.263347	0.318312	0.350791	0.439852	0.496094	0.496094	0.594338	0.702437	0.744141	0.915525	1.10379	1.24023	1.4562	1.75396	2.36152	4.61394
0	0	0	0	0	0	0	0.0851062	0.13908	0.199428	0.248047	0.248047	0.264327	0.319052	0.350791	0.441452	0.496094	0.496732	0.594484	0.70804	0.744141	0.916753	1.10506	1.24023	1.47139	1.75396	2.36173	4.6339
0	0	0	0	0	0	0	0.0859798	0.141119	0.199549	0.248047	0.248047	0.264698	0.319969	0.350791	0.442681	0.496094	0.4985	0.598692	0.709434	0.744141	0.920211	1.1093	1.24023	1.47299	1.75396	2.37665	4.6339
0	0	0	0	0	0	0	0.0865253	0.141126	0.199839	0.248047	0.248047	0.270296	0.321184	0.350791	0.446213	0.496094	0.501154	0.599687	0.714937	0.744141	0.924792	1.1093	1.24023	1.47488	1.75396	2.39914	4.6339
0	0	0	0	0	0	0	0.0866483	0.143867	0.201433	0.248047	0.248047	0.273873	0.321833	0.350791	0.447506	0.496094	0.505837	0.602286	0.724411	0.744141	0.931994	1.1093	1.24023	1.4826	1.75396	2.48047	4.6339
0	0	0	0	0	0	0	0.0880942	0.145647	0.201786	0.248047	0.248047	0.276065	0.32335	0.353381	0.448013	0.496094	0.506518	0.603352	0.729938	0.744141	0.932962	1.1093	1.2597	1.48828	1.75396	2.48047	4.69351
0	0	0	0	0	0	0	0.0883	0.147188	0.205812	0.248047	0.248047	0.278458	0.326519	0.354404	0.448597	0.496094	0.510136	0.606601	0.736621	0.749302	0.946982	1.1093	1.26204	1.48828	1.75396	2.48047	4.73893
0	0	0	0	0	0	0	0.0889726	0.147514	0.207619	0.248047	0.248047	0.279333	0.327304	0.358236	0.455049	0.496094	0.521235	0.617745	0.73839	0.750963	0.953332	1.1093	1.2648	1.48828	1.75396	2.48047	4.74642
0	0	0	0	0	0	0	0.0920399	0.147667	0.20823	0.248047	0.248047	0.281076	0.328927	0.358437	0.464412	0.496094	0.522635	0.621144	0.74076	0.754915	0.982342	1.1093	1.2648	1.48828	1.758	2.48047	4.76482
0	0	0	0	0	0	0	0.0922863	0.148943	0.210178	0.248047	0.248047	0.283398	0.330743	0.361281	0.467692	0.496094	0.524074	0.623432	0.744141	0.757986	0.992188	1.11665	1.2648	1.48828	1.75872	2.48047	4.77128
0	0	0	0	0	0	0	0.0963199	0.152302	0.210753	0.248047	0.248047	0.286128	0.3335	0.362024	0.476021	0.496094	0.525199	0.625024	0.744141	0.784393	0.992188	1.11989	1.2648	1.48828	1.76255	2.48047	4.9071
0	0	0	0	0	0	0	0.0971914	0.152302	0.211896	0.248047	0.248047	0.286469	0.334342	0.363308	0.480878	0.496094	0.52627	0.629784	0.744141	0.784393	0.992188	1.12952	1.2648	1.48828	1.78869	2.48047	4.91108
0	0	0	0	0	0	0	0.0973935	0.153156	0.212103	0.248047	0.248047	0.286835	0.334493	0.364128	0.484333	0.496094	0.532941	0.630685	0.744141	0.784393	0.992188	1.13282	1.2648	1.50211	1.78869	2.48047	4.91471
0	0	0	0	0	0	0	0.101336	0.155011	0.212796	0.248047	0.248047	0.288117	0.338291	0.366344	0.487155	0.496094	0.537639	0.636745	0.744141	0.784393	0.992188	1.13861	1.2648	1.50881	1.81077	2.49284	4.92359
0	0	0	0	0	0	0	0.101746	0.155277	0.214595	0.248047	0.248047	0.290653	0.34168	0.366513	0.488085	0.496094	0.538554	0.640274	0.744141	0.784393	0.992188	1.13996	1.2648	1.50881	1.85067	2.49284	4.92359
0	0	0	0	0	0	0	0.106155	0.158024	0.214781	0.248047	0.248047	0.293077	0.342086	0.370965	0.488902	0.496094	0.539124	0.642067	0.744141	0.784393	0.992188	1.14592	1.2648	1.51714	1.86031	2.4964	4.92777
0	0	0	0	0	0	0	0.106393	0.158068	0.221965	0.248047	0.248047	0.29372	0.344022	0.376087	0.491258	0.496094	0.544835	0.642239	0.744141	0.784393	0.992188	1.15065	1.27003	1.5258	1.86724	2.52959	4.9423
0	0	0	0	0	0	0	0.10768	0.163075	0.22581	0.248047	0.248047	0.294297	0.344936	0.377589	0.496094	0.496094	0.54969	0.642315	0.744141	0.784393	0.992188	1.152	1.282	1.52692	1.87368	2.53463	5.01105
0	0	0	0	0	0	0.00415987	0.109852	0.16571	0.227618	0.248047	0.248047	0.294681	0.346201	0.380189	0.496094	0.496094	0.55408	0.647522	0.744141	0.818314	1.00043	1.15284	1.29919	1.52748	1.87651	2.5538	5.01611
0	0	0	0	0	0	0.0077908	0.11	0.168798	0.227909	0.248047	0.248047	0.295577	0.347603	0.381423	0.496094	0.496094	0.55465	0.664848	0.744141	0.823272	1.00058	1.16521	1.30148	1.53252	1.87927	2.5538	5.02257
0	0	0	0	0	0	0.0285297	0.113437	0.170854	0.228018	0.248047	0.248047	0.296583	0.350667	0.383527	0.496094	0.496094	0.55465	0.666332	0.744141	0.824886	1.00313	1.16792	1.3034	1.53505	1.88525	2.5538	5.04419
0	0	0	0	0	0	0.0300344	0.113625	0.173617	0.230981	0.248047	0.248047	0.297257	0.350791	0.38402	0.496094	0.496094	0.55465	0.668098	0.744141	0.833338	1.00514	1.17177	1.32326	1.54396	1.89656	2.5538	5.04556
0	0	0	0	0	0	0.0315887	0.114392	0.174987	0.233253	0.248047	0.248047	0.298914	0.350791	0.38455	0.496094	0.496094	0.55465	0.668363	0.744141	0.837602	1.00538	1.1727	1.32465	1.55492	1.89664	2.5538	5.0895
0	0	0	0	0	0	0.0321324	0.115707	0.175945	0.234094	0.248047	0.248047	0.299904	0.350791	0.390556	0.496094	0.496094	0.55465	0.671483	0.744141	0.837732	1.00687	1.18461	1.32804	1.56724	1.90075	2.5538	5.11362
0	0	0	0	0	0	0.0358711	0.116137	0.17858	0.235287	0.248047	0.248047	0.301912	0.350791	0.391212	0.496094	0.496094	0.55465	0.67168	0.744141	0.845232	1.00742	1.18625	1.33577	1.57294	1.90486	2.5538	5.12765
0	0	0	0	0	0	0.0430524	0.117108	0.181311	0.235418	0.248047	0.248047	0.301964	0.350791	0.397161	0.496094	0.496094	0.55465	0.674072	0.744141	0.85169	1.00864	1.19177	1.33577	1.58141	1.92005	2.56499	5.16152
0	0	0	0	0	0	0.0456113	0.118215	0.18177	0.235443	0.248047	0.248047	0.302444	0.350791	0.400852	0.496094	0.496094	0.55465	0.677973	0.744141	0.853483	1.02272	1.19633	1.33577	1.58504	1.93173	2.57598	5.23255
0	0	0	0	0	0	0.0464141	0.120061	0.184852	0.237546	0.248047	0.248047	0.305603	0.350791	0.403889	0.496094	0.496094	0.55465	0.680643	0.744141	0.865039	1.02272	1.20232	1.33577	1.58734	1.93731	2.64992	5.27151
0	0	0	0	0	0	0.0464479	0.120546	0.18589	0.237999	0.248047	0.248047	0.305993	0.350791	0.408668	0.496094	0.496094	0.55465	0.681555	0.744141	0.872393	1.02647	1.21812	1.33577	1.58827	1.93731	2.67155	5.27355
0	0	0	0	0	0	0.0465676	0.121281	0.187817	0.238943	0.248047	0.248047	0.306006	0.350791	0.409554	0.496094	0.496094	0.55465	0.681739	0.744141	0.872864	1.03124	1.23426	1.33577	1.58827	1.93731	2.68048	5.34309
0	0	0	0	0	0	0.0482222	0.122232	0.191115	0.240242	0.248047	0.248047	0.306504	0.350791	0.410177	0.496094	0.496094	0.55465	0.684604	0.744141	0.879686	1.03266	1.24016	1.33577	1.58827	1.93731	2.68304	5.44009
0	0	0	0	0	0	0.0494119	0.124056	0.196656	0.244146	0.248047	0.248047	0.307354	0.350791	0.413084	0.496094	0.496094	0.55465	0.685755	0.744141	0.88266	1.03635	1.24023	1.33577	1.58827	1.93731	2.70571	5.44009
0	0	0	0	0	0	0.0494283	0.12665	0.196929	0.246311	0.248047	0.248047	0.311946	0.350791	0.414312	0.496094	0.497632	0.55465	0.686463	0.744141	0.88422	1.03937	1.24023	1.33577	1.58827	1.93731	2.72852	5.56424
0	0	0	0	0	0	0.050043	0.127079	0.197002	0.248047	0.248047	0.248483	0.314315	0.350791	0.414516	0.496094	0.501422	0.55465	0.689647	0.744141	0.885889	1.0395	1.24023	1.33577	1.58827	1.94925	2.72852	5.62361
0	0	0	0	0	0	0.0502044	0.127586	0.197515	0.248047	0.248047	0.248546	0.315354	0.350791	0.418349	0.496094	0.50789	0.55465	0.701583	0.744141	0.888917	1.04203	1.24023	1.33577	1.58827	1.95192	2.73977	5.65634
0	0	0	0	0	0	0.0528922	0.12844	0.19792	0.248047	0.248047	0.2504	0.318003	0.350791	0.418403	0.496094	0.508112	0.56507	0.701583	0.744141	0.894346	1.05237	1.24023	1.33577	1.58827	1.96916	2.76137	5.66721
0	0	0	0	0	0	0.0532501	0.128666	0.201195	0.248047	0.248047	0.251705	0.319797	0.350791	0.419018	0.496094	0.508372	0.569718	0.701583	0.744141	0.894346	1.05237	1.24023	1.34126	1.58899	1.97049	2.77325	5.72069
0	0	0	0	0	0	0.0532605	0.130383	0.201229	0.248047	0.248047	0.253505	0.319861	0.350791	0.4241	0.496094	0.509048	0.579046	0.701583	0.744141	0.894346	1.05237	1.24023	1.34202	1.63426	1.98438	2.77325	5.75092
0	0	0	0	0	0	0.0545969	0.131871	0.201643	0.248047	0.248047	0.254504	0.320842	0.350791	0.43028	0.496094	0.511194	0.588015	0.701583	0.744141	0.894346	1.05237	1.24023	1.34744	1.63546	1.98438	2.77325	5.82231
0	0	0	0	0	0	0.0552434	0.132711	0.202465	0.248047	0.248047	0.254542	0.323244	0.352768	0.432695	0.496094	0.516325	0.603689	0.701583	0.744141	0.894346	1.05237	1.24023	1.34878	1.6435	1.98438	2.77325	5.83833
0	0	0	0	0	0	0.0553961	0.134251	0.210878	0.248047	0.248047	0.256045	0.325116	0.35562	0.433078	0.496094	0.516364	0.604424	0.701583	0.744141	0.894346	1.06366	1.24023	1.35402	1.65002	1.98438	2.77325	5.91684
0	0	0	0	0	0	0.0560763	0.134428	0.211441	0.248047	0.248047	0.258016	0.326122	0.35636	0.433784	0.496094	0.51967	0.608764	0.701583	0.747344	0.894346	1.06509	1.24023	1.35839	1.65131	1.98438	2.77325	6.03524
0	0	0	0	0	0	0.0584787	0.134845	0.212929	0.248047	0.248047	0.259359	0.326932	0.35652	0.433867	0.496094	0.531834	0.611035	0.701583	0.753733	0.894346	1.06701	1.24023	1.36384	1.6541	1.9909	2.77325	6.08128
0	0	0	0	0	0	0.0587599	0.135632	0.214006	0.248047	0.248047	0.260032	0.331198	0.357037	0.434732	0.496094	0.532242	0.611437	0.701583	0.763009	0.894346	1.06902	1.24023	1.37154	1.66351	1.99982	2.77325	6.24566
0	0	0	0	0	0	0.0625197	0.135883	0.214823	0.248047	0.248047	0.26114	0.332811	0.357344	0.438184	0.496094	0.534343	0.615875	0.701583	0.765024	0.894346	1.06921	1.24023	1.37233	1.68322	2.00691	2.83966	6.3302
0	0	0	0	0	0	0.0661045	0.137026	0.215053	0.248047	0.248047	0.264545	0.336023	0.359014	0.438506	0.496094	0.537274	0.616229	0.704129	0.765478	0.894346	1.0746	1.24023	1.37778	1.69672	2.01792	2.84381	6.3531
0	0	0	0	0	0	0.0666976	0.13955	0.215524	0.248047	0.248047	0.265186	0.33749	0.359187	0.439592	0.496094	0.541806	0.61965	0.710665	0.775092	0.894346	1.078	1.24023	1.37969	1.69936	2.03941	2.86313	6.50824
0	0	0	0	0	0	0.0667668	0.141103	0.216064	0.248047	0.248047	0.266196	0.338236	0.361679	0.441235	0.496094	0.542639	0.621747	0.72079	0.776061	0.894346	1.08133	1.24023	1.3798	1.71623	2.04242	2.91802	6.61903
0	0	0	0	0	0	0.0672011	0.142109	0.218927	0.248047	0.248047	0.26744	0.33871	0.363086	0.443765	0.496094	0.546594	0.62347	0.720818	0.777731	0.894805	1.08367	1.24023	1.38195	1.73633	2.04582	2.97656	6.81113
0	0	0	0	0	0	0.0675965	0.143849	0.223312	0.248047	0.248047	0.268727	0.338852	0.363292	0.443771	0.496094	0.55465	0.625741	0.72271	0.778844	0.902661	1.08543	1.24023	1.38377	1.73633	2.05659	2.97656	6.81113
0	0	0	0	0	0	0.0710958	0.14507	0.224341	0.248047	0.248047	0.27305	0.33908	0.365152	0.444046	0.496094	0.55465	0.626695	0.729688	0.784393	0.906662	1.08857	1.24023	1.40114	1.73633	2.05682	2.97656	6.99093
0	0	0	0	0	0	0.0744898	0.145575	0.224896	0.248047	0.248047	0.27335	0.340767	0.367001	0.446862	0.496094	0.55465	0.628933	0.735967	0.784393	0.908969	1.09138	1.24023	1.41098	1.73633	2.05825	2.98688	7.02021
0	0	0	0	0	0	0.0748519	0.147228	0.226402	0.248047	0.248047	0.274351	0.342702	0.368792	0.449346	0.496094	0.55465	0.630299	0.743056	0.784393	0.914359	1.09315	1.24023	1.42094	1.73633	2.10475	2.98688	7.05518
0	0	0	0	0	0	0.0751968	0.147787	0.226524	0.248047	0.248047	0.275741	0.343066	0.371436	0.449765	0.496094	0.55465	0.633654	0.744141	0.784393	0.916148	1.10095	1.24023	1.42691	1.73633	2.11422	2.98688	7.05518
0	0	0	0	0	0	0.0761731	0.147836	0.226764	0.248047	0.248047	0.279154	0.343148	0.374006	0.45605	0.496094	0.55465	0.64654	0.744141	0.784393	0.916741	1.10313	1.24023	1.43496	1.73633	2.11931	2.98688	7.23175
0	0	0	0	0	0	0.0763978	0.148607	0.229443	0.248047	0.248047	0.281138	0.343574	0.375164	0.46014	0.496094	0.55465	0.649243	0.744141	0.784393	0.938988	1.10857	1.24023	1.44635	1.73633	2.12605	3.0278	7.28065
0	0	0	0	0	0	0.0769378	0.15446	0.230338	0.248047	0.248047	0.281741	0.343939	0.375955	0.468485	0.496094	0.55465	0.653092	0.744141	0.784393	0.941818	1.1093	1.2428	1.44635	1.73633	2.1324	3.06817	7.44554
0	0	0	0	0	0	0.0769546	0.157194	0.230674	0.248047	0.248047	0.28325	0.347251	0.377083	0.46866	0.496094	0.55465	0.656075	0.744141	0.784393	0.949341	1.1093	1.24853	1.44635	1.73633	2.13378	3.30936	7.44554
0	0	0	0	0	0	0.07995	0.1591	0.231007	0.248047	0.248047	0.291936	0.349051	0.378186	0.471266	0.496094	0.55465	0.656761	0.744141	0.784393	0.952296	1.1093	1.24944	1.44635	1.73633	2.13378	3.39032	7.47852
0	0	0	0	0	0	0.0799598	0.159422	0.231305	0.248047	0.248047	0.292327	0.350614	0.382301	0.474273	0.496094	0.55465	0.657002	0.744141	0.786567	0.955766	1.1093	1.25098	1.44635	1.73633	2.13378	3.39479	7.54405
0	0	0	0	0	0	0.0815922	0.159561	0.233629	0.248047	0.248047	0.299665	0.350667	0.385359	0.474399	0.496094	0.55465	0.667684	0.744141	0.791786	0.961239	1.1093	1.25437	1.44635	1.73633	2.13378	3.41385	7.78883
0	0	0	0	0	0	0.0834944	0.165138	0.234013	0.248047	0.248047	0.300328	0.350791	0.390833	0.478903	0.496094	0.55465	0.668357	0.744141	0.79603	0.965745	1.1093	1.2648	1.44635	1.73633	2.15252	3.44598	8.11003
0	0	0	0	0	0	0.0850334	0.16824	0.234231	0.248047	0.248047	0.300525	0.350791	0.401162	0.481866	0.496094	0.55465	0.66888	0.744141	0.808933	0.969133	1.1093	1.2648	1.44635	1.73633	2.16995	3.45489	8.24546
0	0	0	0	0	0	0.0858387	0.168706	0.234441	0.248047	0.248047	0.301281	0.350791	0.402466	0.490192	0.496094	0.55465	0.669143	0.744141	0.809479	0.970919	1.1093	1.2648	1.44635	1.73633	2.19744	3.45489	8.76978
0	0	0	0	0	0	0.088451	0.169239	0.2354	0.248047	0.248047	0.301964	0.350791	0.402555	0.49483	0.496094	0.55465	0.679202	0.744141	0.81591	0.980828	1.1093	1.2648	1.44635	1.73633	2.20193	3.45489	8.8327
0	0	0	0	0	0	0.0892242	0.172341	0.236794	0.248047	0.248047	0.302877	0.350791	0.404305	0.495923	0.500275	0.55465	0.687109	0.744141	0.822603	0.98092	1.11285	1.2648	1.45638	1.73633	2.22555	3.45489	8.88133
0	0	0	0	0	0.0183643	0.0922788	0.174005	0.237155	0.248047	0.248047	0.303731	0.350791	0.404902	0.496094	0.500443	0.55465	0.68905	0.744141	0.822679	0.983044	1.12659	1.2648	1.4622	1.74962	2.23006	3.506	8.88133
0	0	0	0	0	0.023251	0.0922856	0.174603	0.237455	0.248047	0.248047	0.304985	0.350791	0.405035	0.496094	0.506912	0.55465	0.701583	0.744141	0.822891	0.987881	1.13826	1.2648	1.46318	1.75373	2.23242	3.50791	8.96064
0	0	0	0	0	0.0277729	0.0923478	0.175538	0.238576	0.248047	0.248047	0.309704	0.350791	0.407799	0.496094	0.51296	0.55465	0.701583	0.744141	0.828352	0.992188	1.1607	1.2648	1.47392	1.75396	2.23242	3.52541	8.96407
0	0	0	0	0	0.029892	0.0930387	0.177923	0.238719	0.248047	0.248047	0.310594	0.350791	0.408951	0.496094	0.523731	0.55465	0.701583	0.744141	0.832954	0.992188	1.16091	1.2648	1.47662	1.75396	2.23242	3.55149	9.09693
0	0	0	0	0	0.0322198	0.0932921	0.178498	0.242644	0.248047	0.248047	0.312247	0.350791	0.415945	0.496094	0.534223	0.557234	0.701583	0.744141	0.848526	0.992188	1.16385	1.2648	1.47825	1.75396	2.24616	3.55149	9.29762
0	0	0	0	0	0.0323207	0.0963225	0.179487	0.243718	0.248047	0.248047	0.312707	0.350791	0.420967	0.496094	0.536814	0.560442	0.701583	0.744141	0.848796	0.992188	1.16792	1.2648	1.48109	1.75396	2.24616	3.57738	9.32406
0	0	0	0	0	0.0344781	0.0994192	0.180076	0.244837	0.248047	0.248047	0.312817	0.350791	0.4214	0.496094	0.538052	0.563543	0.701583	0.744141	0.865232	0.992188	1.17504	1.27421	1.48828	1.75396	2.247	3.60204	9.58116
0	0	0	0	0	0.0346585	0.102114	0.180479	0.245605	0.248047	0.248047	0.314261	0.350791	0.422394	0.496094	0.540881	0.565539	0.701583	0.744141	0.865296	0.992188	1.17561	1.27706	1.48828	1.75396	2.24849	3.68748	9.6611
0	0	0	0	0	0.035457	0.103117	0.182105	0.245876	0.248047	0.248047	0.316149	0.350791	0.422979	0.496094	0.541744	0.570235	0.701583	0.744141	0.870344	0.992188	1.1776	1.27885	1.48828	1.75396	2.2792	3.68748	9.6611
0	0	0	0	0	0.0364741	0.103959	0.182265	0.245978	0.248047	0.248047	0.316866	0.350791	0.423259	0.496094	0.54432	0.574256	0.701583	0.744141	0.871388	0.992188	1.18354	1.28017	1.48828	1.75396	2.28688	3.72896	9.99909
0	0	0	0	0	0.0368742	0.105651	0.182412	0.246486	0.248047	0.248047	0.31711	0.350791	0.424955	0.496094	0.546255	0.575925	0.701583	0.744141	0.891437	0.992188	1.18535	1.28266	1.48828	1.75396	2.28688	3.74376	10.666
0	0	0	0	0	0.0370689	0.107127	0.183435	0.247398	0.248047	0.248047	0.318275	0.351489	0.426112	0.496094	0.54931	0.578109	0.701619	0.744141	0.894346	0.992188	1.18926	1.28365	1.48828	1.75396	2.29039	3.75363	10.6862
0	0	0	0	0	0.0387987	0.107931	0.185204	0.248047	0.248047	0.248047	0.318851	0.356167	0.428967	0.496094	0.552207	0.579904	0.703988	0.744141	0.894346	0.992188	1.18952	1.2848	1.48828	1.75396	2.29176	3.82603	11.1924
0	0	0	0	0	0.0399386	0.109138	0.187244	0.248047	0.248047	0.248047	0.319566	0.356675	0.430737	0.496094	0.552305	0.582552	0.708906	0.744141	0.894346	0.992188	1.19189	1.28525	1.48828	1.75396	2.29769	3.87462	12.442
0	0	0	0	0	0.0406731	0.112029	0.187861	0.248047	0.248047	0.248047	0.323193	0.361261	0.431971	0.496094	0.55465	0.584454	0.710398	0.744141	0.894346	0.993048	1.20157	1.29087	1.48828	1.75649	2.31371	3.87462	12.6601
0	0	0	0	0	0.0420652	0.112298	0.188655	0.248047	0.248047	0.248047	0.323493	0.366873	0.432794	0.496094	0.55465	0.588505	0.710483	0.744141	0.894346	0.99391	1.2046	1.29711	1.48828	1.78869	2.34007	3.87462	12.769
0	0	0	0	0	0.0427917	0.112689	0.191828	0.248047	0.248047	0.248047	0.324218	0.369493	0.438879	0.496094	0.55465	0.589836	0.710665	0.744141	0.894346	1.00043	1.21363	1.30076	1.48828	1.78869	2.34007	3.87462	12.8722
0	0	0	0	0	0.0447615	0.113655	0.191971	0.248047	0.248047	0.248047	0.324977	0.370923	0.440674	0.496094	0.55465	0.591972	0.713999	0.744141	0.894346	1.00435	1.22	1.30774	1.48828	1.78869	2.34007	3.87462	13.036
0	0	0	0	0	0.0463962	0.118438	0.195441	0.248047	0.248047	0.248047	0.325345	0.371995	0.44534	0.496094	0.55465	0.597024	0.721247	0.744141	0.894346	1.00909	1.22474	1.30801	1.50211	1.79284	2.34007	3.92197	13.0996
0	0	0	0	0	0.0475901	0.118746	0.195939	0.248047	0.248047	0.248047	0.326868	0.373475	0.44681	0.496094	0.55465	0.599503	0.722306	0.744141	0.894346	1.0119	1.22529	1.30865	1.50881	1.79302	2.35318	3.92197	13.2049
0	0	0	0	0	0.0476277	0.119946	0.196969	0.248047	0.248047	0.248047	0.328045	0.375353	0.447275	0.496094	0.55465	0.610425	0.72271	0.744141	0.894346	1.01196	1.22839	1.31103	1.50881	1.80292	2.39914	3.98218	13.4998
0	0	0	0	0	0.0505092	0.121579	0.198451	0.248047	0.248047	0.248047	0.328243	0.38031	0.448402	0.496094	0.55465	0.616225	0.727818	0.749028	0.894346	1.01214	1.22847	1.31261	1.50881	1.80581	2.44298	3.99964	13.6988
0	0	0	0	0	0.0525475	0.123584	0.203157	0.248047	0.248047	0.248623	0.331501	0.38056	0.450083	0.496094	0.55465	0.618253	0.730359	0.76216	0.894346	1.02101	1.22899	1.31955	1.50881	1.80581	2.48047	4.03791	14.0689
0	0	0	0	0	0.0531517	0.128091	0.206515	0.248047	0.248047	0.249536	0.331709	0.381032	0.451695	0.496094	0.55465	0.622024	0.73347	0.762287	0.894346	1.02272	1.23167	1.33566	1.50881	1.80581	2.48047	4.03791	14.0689
0	0	0	0	0	0.0568543	0.128513	0.206558	0.248047	0.248047	0.250146	0.335498	0.383108	0.460479	0.496094	0.55465	0.628484	0.733741	0.764358	0.901052	1.02272	1.23197	1.33577	1.50881	1.81235	2.48047	4.06827	14.3546
0	0	0	0	0	0.0603516	0.132013	0.2074	0.248047	0.248047	0.250771	0.336152	0.383771	0.462722	0.496094	0.55465	0.639469	0.738184	0.766122	0.901182	1.02272	1.23432	1.33577	1.51004	1.82304	2.48047	4.06827	15.4448
0	0	0	0	0	0.0631816	0.133472	0.207734	0.248047	0.248047	0.250971	0.336245	0.387444	0.462811	0.496094	0.55465	0.639542	0.743005	0.767274	0.906759	1.02508	1.23599	1.33577	1.51557	1.84047	2.48047	4.10421	15.5242
0	0	0	0	0	0.0635934	0.137139	0.207897	0.248047	0.248047	0.251608	0.336402	0.390282	0.462995	0.496094	0.55465	0.639715	0.744141	0.770822	0.907224	1.03336	1.23756	1.33577	1.5258	1.84142	2.48047	4.10872	16.3127
0	0	0	0	0	0.0650835	0.13742	0.208027	0.248047	0.248047	0.252624	0.336632	0.392845	0.464722	0.496094	0.55465	0.646892	0.744141	0.776069	0.910265	1.03384	1.23813	1.33577	1.52875	1.84983	2.48047	4.12582	16.6518
0	0	0	0	0	0.0658521	0.13919	0.210346	0.248047	0.248047	0.253511	0.338592	0.402928	0.476075	0.496094	0.55465	0.650117	0.744141	0.783605	0.910664	1.03681	1.23928	1.33577	1.53331	1.85219	2.48047	4.12832	16.669
0	0	0	0	0	0.0661062	0.141897	0.211709	0.248047	0.248047	0.258676	0.33861	0.403575	0.476719	0.496094	0.55465	0.653064	0.744141	0.784393	0.910746	1.04134	1.23954	1.33577	1.53751	1.85612	2.48047	4.13815	17.2031
0	0	0	0	0	0.0668721	0.144189	0.21299	0.248047	0.248047	0.259515	0.340891	0.404818	0.480482	0.496094	0.55465	0.656259	0.744141	0.784393	0.915165	1.05237	1.24023	1.33577	1.54364	1.86031	2.48047	4.17301	17.3042
0	0	0	0	0	0.0670342	0.144371	0.217392	0.248047	0.248047	0.261054	0.344083	0.405183	0.481454	0.496094	0.55465	0.661106	0.744141	0.784393	0.923215	1.05237	1.24023	1.33577	1.55108	1.86154	2.48047	4.17565	17.9213
0	0	0	0	0	0.0676155	0.144433	0.218063	0.248047	0.248047	0.261798	0.344633	0.405296	0.482114	0.496094	0.55465	0.664045	0.744141	0.784393	0.923549	1.05237	1.24023	1.33577	1.55641	1.87334	2.48047	4.21123
0	0	0	0	0	0.0678437	0.146129	0.220128	0.248047	0.248047	0.267997	0.344961	0.405334	0.483035	0.496094	0.55465	0.668609	0.744141	0.784393	0.932291	1.05237	1.24023	1.34367	1.56259	1.87985	2.48047	4.2168
0	0	0	0	0	0.06813	0.146348	0.220172	0.248047	0.248047	0.27023	0.345472	0.406832	0.487008	0.496094	0.55465	0.671924	0.744141	0.784393	0.934477	1.05245	1.24023	1.34388	1.56879	1.88343	2.48047	4.26756
0	0	0	0	0	0.0691054	0.147795	0.222133	0.248047	0.248047	0.272303	0.346711	0.407309	0.490215	0.496094	0.55465	0.686273	0.744141	0.784393	0.936551	1.06035	1.24023	1.35146	1.57708	1.90169	2.48403	4.33111
0	0	0	0	0	0.0691139	0.148763	0.223486	0.248047	0.248047	0.272866	0.349089	0.408238	0.49258	0.496094	0.55465	0.689747	0.744141	0.784393	0.939444	1.06847	1.24023	1.35637	1.58827	1.90211	2.49284	4.3567
0	0	0	0	0	0.0693664	0.15026	0.224012	0.248047	0.248047	0.275166	0.350791	0.413149	0.495101	0.496094	0.55465	0.691563	0.744141	0.784393	0.939729	1.07249	1.24023	1.3776	1.58827	1.92864	2.49284	4.3954
0	0	0	0	0	0.069965	0.150676	0.226473	0.248047	0.248047	0.275238	0.350791	0.413221	0.496076	0.496094	0.557081	0.694103	0.744141	0.784393	0.939766	1.07705	1.24023	1.38126	1.58827	1.93731	2.49836	4.3954
0	0	0	0	0	0.0717286	0.152492	0.226694	0.248047	0.248047	0.2758	0.350791	0.413683	0.496094	0.496094	0.557403	0.697785	0.744141	0.784393	0.94161	1.08102	1.24023	1.38303	1.58827	1.93731	2.52959	4.3954
0	0	0	0	0	0.0718485	0.154235	0.227298	0.248047	0.248047	0.276955	0.350791	0.415142	0.496094	0.496094	0.558352	0.701583	0.744141	0.784393	0.943884	1.08247	1.24023	1.38912	1.58827	1.93731	2.53463	4.3954
0	0	0	0	0	0.0723058	0.156349	0.227335	0.248047	0.248047	0.278711	0.350791	0.415402	0.496094	0.496094	0.558797	0.701583	0.744141	0.784393	0.948438	1.08555	1.24023	1.40249	1.58827	1.93731	2.53669	4.41635
0	0	0	0	0	0.0735497	0.157122	0.227682	0.248047	0.248047	0.279248	0.350791	0.416855	0.496094	0.496094	0.562193	0.701583	0.744141	0.784393	0.952489	1.08698	1.24023	1.40317	1.59072	1.93731	2.54695	4.47173
0	0	0	0	0	0.0750604	0.157772	0.227964	0.248047	0.248047	0.280997	0.350791	0.418065	0.496094	0.496094	0.563465	0.701583	0.744141	0.784393	0.953079	1.10741	1.24023	1.40317	1.60957	1.93731	2.5538	4.47173
0	0	0	0	0	0.0752328	0.15934	0.23035	0.248047	0.248047	0.281118	0.350791	0.419561	0.496094	0.496094	0.565812	0.701583	0.744141	0.784393	0.955791	1.1093	1.24023	1.41045	1.60978	1.93731	2.5538	4.47173
0	0	0	0	0	0.0754231	0.159455	0.230498	0.248047	0.248047	0.282336	0.350791	0.421771	0.496094	0.496094	0.567111	0.701583	0.744141	0.784393	0.956975	1.1093	1.24023	1.41532	1.61148	1.93731	2.5538	4.47173
0	0	0	0	0	0.0756712	0.16031	0.231867	0.248047	0.248047	0.283735	0.350791	0.423699	0.496094	0.496094	0.567432	0.701583	0.744141	0.784393	0.967301	1.1093	1.24023	1.41697	1.61428	1.93731	2.5538	4.49789
0	0	0	0	0	0.0764525	0.161684	0.232721	0.248047	0.248047	0.287241	0.350791	0.425215	0.496094	0.496094	0.571509	0.701837	0.744141	0.784393	0.967687	1.1093	1.24023	1.43288	1.61554	1.94402	2.5538	4.54428
0	0	0	0	0	0.0765057	0.162221	0.233164	0.248047	0.248047	0.291012	0.350791	0.425754	0.496094	0.496094	0.581705	0.707134	0.744141	0.791831	0.969434	1.1093	1.24023	1.4368	1.61765	1.94842	2.5538	4.56029
0	0	0	0	0	0.0771343	0.162858	0.23448	0.248047	0.248047	0.2917	0.350791	0.42578	0.496094	0.496094	0.582432	0.710665	0.744141	0.7986	0.970019	1.11248	1.24023	1.43813	1.6206	1.95654	2.5538	4.56029
0	0	0	0	0	0.0808326	0.163345	0.237625	0.248047	0.248047	0.292953	0.350791	0.428194	0.496094	0.496094	0.584316	0.714221	0.744141	0.802557	0.97075	1.11602	1.24023	1.44635	1.6435	1.96377	2.5538	4.56536
0	0	0	0	0	0.0828463	0.164114	0.237845	0.248047	0.248047	0.299642	0.350791	0.432704	0.496094	0.496094	0.586889	0.714945	0.744141	0.808793	0.975788	1.11687	1.24023	1.44635	1.66395	1.97314	2.56344	4.61394
0	0	0	0	0	0.0849216	0.165655	0.238861	0.248047	0.248047	0.300562	0.350791	0.437392	0.496094	0.496094	0.587034	0.716463	0.744141	0.809977	0.978501	1.11749	1.24023	1.44635	1.66395	1.97839	2.58969	4.66698
0	0	0	0	0.00422409	0.0910171	0.165938	0.239792	0.248047	0.248047	0.300566	0.353899	0.439649	0.496094	0.496094	0.595831	0.716979	0.744141	0.81623	0.983484	1.11859	1.24023	1.44635	1.66395	1.98438	2.58969	4.68014
0	0	0	0	0.0138962	0.0927597	0.166334	0.239853	0.248047	0.248047	0.302869	0.35479	0.439943	0.496094	0.496094	0.597759	0.719519	0.744141	0.817299	0.987215	1.11877	1.24023	1.44635	1.66918	1.98438	2.6158	4.68014
0	0	0	0	0.0139155	0.0931086	0.166951	0.239983	0.248047	0.248047	0.303246	0.355433	0.442257	0.496094	0.496094	0.597991	0.719738	0.744141	0.81825	0.988582	1.12108	1.24023	1.44635	1.69199	1.98438	2.62984	4.70636
0	0	0	0	0.02096	0.0954554	0.167424	0.24026	0.248047	0.248047	0.303721	0.357739	0.443544	0.496094	0.496094	0.598064	0.72271	0.744141	0.819251	0.992188	1.12112	1.24023	1.44635	1.69619	1.98438	2.63457	4.72009
0	0	0	0	0.0233283	0.095662	0.167759	0.241106	0.248047	0.248047	0.304299	0.359821	0.444306	0.496094	0.497925	0.598904	0.722819	0.744141	0.819581	0.992188	1.12346	1.24023	1.44635	1.70223	1.98438	2.66264	4.73893
0	0	0	0	0.0255344	0.0964057	0.168748	0.241437	0.248047	0.248047	0.305086	0.36029	0.445131	0.496094	0.500694	0.607241	0.724477	0.74458	0.822768	0.992188	1.12473	1.24023	1.44635	1.73168	1.9948	2.67155	4.76482
0	0	0	0	0.0257494	0.0964182	0.169386	0.242919	0.248047	0.248047	0.312286	0.367637	0.446476	0.496094	0.502499	0.611614	0.725174	0.750945	0.827282	0.992188	1.12501	1.24023	1.44635	1.73633	1.99982	2.68304	4.77128
0	0	0	0	0.0259609	0.0990997	0.173388	0.243817	0.248047	0.248047	0.312751	0.370977	0.447101	0.496094	0.50252	0.621294	0.727278	0.760514	0.832462	0.992188	1.12523	1.24023	1.44635	1.73633	1.99982	2.68304	4.79058
0	0	0	0	0.0318112	0.0999824	0.173979	0.243953	0.248047	0.248047	0.313493	0.372365	0.447232	0.496094	0.503572	0.625668	0.729564	0.760718	0.835816	0.992188	1.12524	1.24023	1.44635	1.73633	1.99982	2.72852	4.82704
0	0	0	0	0.0325183	0.100504	0.174328	0.244313	0.248047	0.248047	0.315104	0.374179	0.450605	0.496094	0.504569	0.625991	0.72972	0.764729	0.83833	0.992188	1.12564	1.24023	1.45816	1.73633	2.01024	2.72852	4.83928
0	0	0	0	0.0347133	0.103573	0.176216	0.246101	0.248047	0.248047	0.315258	0.379802	0.450942	0.496094	0.504716	0.628186	0.731949	0.771541	0.847539	0.992188	1.1413	1.25265	1.46447	1.73633	2.03741	2.72852	4.86263
0	0	0	0	0.034802	0.103707	0.176526	0.246445	0.248047	0.248047	0.316004	0.383724	0.451028	0.496094	0.506155	0.630193	0.732702	0.777815	0.849509	0.992188	1.14196	1.25406	1.47118	1.73633	2.03949	2.72852	4.87534
0	0	0	0	0.0353325	0.104095	0.177266	0.248047	0.248047	0.248047	0.316741	0.384844	0.459854	0.496094	0.513682	0.634326	0.736323	0.777934	0.851593	0.992188	1.14416	1.26346	1.47923	1.73633	2.04137	2.72852	4.87706
0	0	0	0	0.035574	0.104114	0.178436	0.248047	0.248047	0.248047	0.321154	0.386546	0.461797	0.496094	0.518991	0.642567	0.738598	0.779619	0.852312	0.992188	1.14586	1.2648	1.48828	1.73633	2.05617	2.72852	4.89225
0	0	0	0	0.0367714	0.104662	0.178474	0.248047	0.248047	0.248047	0.321589	0.3873	0.464594	0.496094	0.522208	0.644729	0.739671	0.779733	0.854791	0.992188	1.14704	1.2648	1.48828	1.73633	2.05659	2.73409	4.92359
0	0	0	0	0.0373926	0.106476	0.178479	0.248047	0.248047	0.248047	0.322036	0.387814	0.465	0.496094	0.528055	0.647172	0.743188	0.784393	0.85627	0.992188	1.1477	1.2648	1.48828	1.73633	2.05661	2.73977	4.92359
0	0	0	0	0.0374495	0.10889	0.178522	0.248047	0.248047	0.248047	0.322184	0.39141	0.465567	0.496094	0.548621	0.649449	0.744141	0.784393	0.861771	0.992188	1.14939	1.2648	1.48828	1.73633	2.06844	2.73977	4.9285
0	0	0	0	0.0398887	0.111965	0.179792	0.248047	0.248047	0.248047	0.322254	0.392343	0.466906	0.496094	0.551136	0.654959	0.744141	0.784393	0.863552	0.992188	1.14984	1.2648	1.48828	1.73633	2.06988	2.73977	4.95669
0	0	0	0	0.0420982	0.112258	0.181073	0.248047	0.248047	0.248047	0.323753	0.396629	0.468876	0.496094	0.55465	0.657494	0.744141	0.784393	0.866456	0.992188	1.1557	1.2648	1.48828	1.74354	2.07505	2.73977	4.97056
0	0	0	0	0.0432662	0.112278	0.181863	0.248047	0.248047	0.248047	0.324051	0.398084	0.471361	0.496094	0.55465	0.658612	0.744141	0.784393	0.867273	0.992188	1.15648	1.2648	1.48828	1.75105	2.07791	2.77325	4.987
0	0	0	0	0.0437365	0.113319	0.183158	0.248047	0.248047	0.248047	0.326412	0.398434	0.474677	0.496094	0.55465	0.659985	0.744141	0.784393	0.868158	0.992188	1.15812	1.2648	1.48828	1.75396	2.09612	2.77325	5.02257
0	0	0	0	0.0441931	0.113382	0.183512	0.248047	0.248047	0.248047	0.326442	0.402888	0.474873	0.496094	0.55465	0.660127	0.744141	0.784393	0.868312	0.992188	1.15938	1.2648	1.48828	1.75396	2.09856	2.77325	5.06079
0	0	0	0	0.0451486	0.114322	0.184023	0.248047	0.248047	0.248047	0.328752	0.403492	0.476615	0.496094	0.55465	0.661825	0.744141	0.784393	0.870281	0.992188	1.16352	1.2648	1.48828	1.75396	2.10475	2.77325	5.0895
0	0	0	0	0.0456194	0.115784	0.186131	0.248047	0.248047	0.248047	0.328967	0.404877	0.479263	0.496094	0.55465	0.663986	0.744141	0.784393	0.879276	0.992188	1.17712	1.2648	1.48828	1.75396	2.10538	2.77325	5.0895
0	0	0	0	0.0463058	0.117391	0.186709	0.248047	0.248047	0.248047	0.329369	0.405806	0.483925	0.496094	0.55465	0.664384	0.744141	0.784393	0.886165	0.992188	1.1782	1.2648	1.48828	1.75396	2.11931	2.77325	5.11362
0	0	0	0	0.049773	0.117445	0.188707	0.248047	0.248047	0.248047	0.33217	0.406848	0.485761	0.496094	0.55465	0.665173	0.744141	0.784393	0.887509	0.99291	1.1835	1.2648	1.48828	1.75396	2.11931	2.77325	5.11815
0	0	0	0	0.0522015	0.119071	0.189694	0.248047	0.248047	0.248047	0.336427	0.407155	0.49195	0.496094	0.55465	0.666079	0.744141	0.784393	0.889796	1.00207	1.1922	1.26733	1.48828	1.75396	2.11931	2.77325	5.21489
0	0	0	0	0.0523341	0.120649	0.189981	0.248047	0.248047	0.248047	0.337364	0.409511	0.496094	0.496094	0.55465	0.666245	0.744141	0.784393	0.894346	1.00912	1.19901	1.26832	1.48828	1.75396	2.1337	2.82196	5.21818
0	0	0	0	0.0534255	0.120751	0.190549	0.248047	0.248047	0.248047	0.338349	0.41197	0.496094	0.496094	0.55465	0.666538	0.744141	0.784393	0.894346	1.01601	1.1999	1.26875	1.48994	1.75396	2.13378	2.82199	5.26187
0	0	0	0	0.0539445	0.121813	0.19205	0.248047	0.248047	0.248047	0.340252	0.41373	0.496094	0.496094	0.55465	0.667311	0.744141	0.784393	0.894346	1.01903	1.20299	1.28744	1.48996	1.75396	2.13378	2.84381	5.26187
0	0	0	0	0.0556677	0.121942	0.192917	0.248047	0.248047	0.248047	0.343302	0.414505	0.496094	0.496094	0.55465	0.669307	0.744141	0.784393	0.894346	1.02036	1.21279	1.29278	1.49087	1.75396	2.13378	2.93833	5.27355
0	0	0	0	0.0569678	0.122156	0.194096	0.248047	0.248047	0.248047	0.344685	0.415078	0.496094	0.496094	0.55465	0.670718	0.744141	0.784393	0.894346	1.02043	1.21346	1.29492	1.49536	1.75396	2.13378	2.98688	5.29221
0	0	0	0	0.0583323	0.122912	0.195275	0.248047	0.248047	0.248047	0.345397	0.4169	0.496094	0.496094	0.55465	0.675151	0.744141	0.785223	0.895478	1.02067	1.21474	1.29665	1.50881	1.75396	2.13378	2.98688	5.41154
0	0	0	0	0.0607652	0.123525	0.195949	0.248047	0.248047	0.248047	0.34653	0.417324	0.496094	0.496094	0.55465	0.676741	0.744141	0.78542	0.89633	1.02272	1.21917	1.29782	1.50881	1.75396	2.13378	3.06817	5.44009
0	0	0	0	0.0613289	0.123653	0.196205	0.248047	0.248047	0.248705	0.346703	0.418427	0.496094	0.496094	0.55465	0.678223	0.744141	0.787565	0.900622	1.02272	1.24023	1.29826	1.50881	1.75396	2.13698	3.10462	5.44009
0	0	0	0	0.0620039	0.124198	0.196779	0.248047	0.248047	0.248897	0.347074	0.421854	0.496094	0.496094	0.55465	0.680114	0.744141	0.79168	0.900866	1.02272	1.24023	1.30015	1.50881	1.75396	2.16921	3.10802	5.44009
0	0	0	0	0.0623462	0.124424	0.196906	0.248047	0.248047	0.249459	0.348002	0.42225	0.496094	0.496094	0.55465	0.68167	0.744141	0.793024	0.903888	1.02272	1.24023	1.30215	1.50881	1.75396	2.19939	3.10802	5.53867
0	0	0	0	0.0643214	0.124817	0.196947	0.248047	0.248047	0.252756	0.350791	0.42578	0.496094	0.496094	0.55465	0.683105	0.744141	0.798296	0.904083	1.02272	1.24023	1.32963	1.51557	1.75396	2.20226	3.17655	5.57175
0	0	0	0	0.0659325	0.125982	0.197012	0.248047	0.248047	0.25344	0.350791	0.42744	0.496094	0.496094	0.55465	0.684514	0.744141	0.801937	0.915635	1.02272	1.24023	1.33577	1.52017	1.75396	2.2186	3.21074	5.57416
0	0	0	0	0.0662379	0.127062	0.197028	0.248047	0.248047	0.256782	0.350791	0.430382	0.496094	0.496094	0.55465	0.69705	0.744141	0.802915	0.921492	1.02272	1.24023	1.33577	1.5258	1.75417	2.2261	3.22461	5.59619
0	0	0	0	0.066721	0.129261	0.197376	0.248047	0.248047	0.257235	0.350791	0.430411	0.496094	0.496094	0.55465	0.697243	0.744141	0.80337	0.924436	1.02272	1.24023	1.33577	1.52875	1.75864	2.23242	3.22461	5.62361
0	0	0	0	0.0682269	0.129748	0.197918	0.248047	0.248047	0.258301	0.350791	0.430555	0.496094	0.496094	0.55465	0.697342	0.744141	0.804163	0.926077	1.02272	1.24023	1.33577	1.53323	1.76056	2.23242	3.30936	5.63197
0	0	0	0	0.0709798	0.129761	0.197983	0.248047	0.248047	0.258345	0.350791	0.430935	0.496094	0.496094	0.55465	0.698942	0.744141	0.804459	0.926918	1.02272	1.24023	1.33577	1.55075	1.76779	2.23242	3.32992	5.65634
0	0	0	0	0.0714484	0.129964	0.199	0.248047	0.248047	0.25919	0.350791	0.431148	0.496094	0.496094	0.55465	0.701583	0.744141	0.804856	0.928553	1.02589	1.24023	1.33577	1.55117	1.76803	2.23242	3.33713	5.71047
0	0	0	0	0.0715826	0.130407	0.199584	0.248047	0.248047	0.260319	0.350791	0.431206	0.496094	0.496094	0.55465	0.701583	0.744141	0.807215	0.928796	1.02627	1.24023	1.33577	1.56228	1.78869	2.24616	3.3738	5.72661
0	0	0	0	0.0716689	0.13096	0.199614	0.248047	0.248047	0.260698	0.350791	0.431639	0.496094	0.496094	0.55465	0.701583	0.744141	0.810994	0.941181	1.02971	1.24023	1.33577	1.56402	1.78869	2.24616	3.38899	5.79071
0	0	0	0	0.0732243	0.131226	0.199896	0.248047	0.248047	0.261199	0.350791	0.43255	0.496094	0.496094	0.555183	0.701583	0.744141	0.818277	0.946464	1.03411	1.24023	1.33577	1.56752	1.78869	2.24616	3.40572	5.83959
0	0	0	0	0.0735629	0.13224	0.201048	0.248047	0.248047	0.262656	0.350791	0.433822	0.496094	0.496094	0.556679	0.701583	0.744141	0.819126	0.950993	1.03722	1.24023	1.33577	1.57009	1.78917	2.26345	3.44598	5.89601
0	0	0	0	0.0735801	0.138162	0.205436	0.248047	0.248047	0.264072	0.350791	0.435108	0.496094	0.496094	0.55718	0.701583	0.744141	0.819883	0.954232	1.0383	1.24023	1.33577	1.57815	1.79225	2.28151	3.45489	5.95481
0	0	0	0	0.0741293	0.13858	0.20681	0.248047	0.248047	0.264835	0.350791	0.435847	0.496094	0.496094	0.559304	0.701583	0.744141	0.82179	0.956415	1.04075	1.24023	1.33577	1.57884	1.79668	2.28688	3.45489	5.99945
0	0	0	0	0.0747137	0.139737	0.207017	0.248047	0.248047	0.265553	0.350791	0.436531	0.496094	0.496242	0.560695	0.701583	0.745232	0.828187	0.958847	1.04249	1.24023	1.33577	1.58477	1.79842	2.28688	3.50791	6.0556
0	0	0	0	0.0754831	0.141685	0.207657	0.248047	0.248047	0.26605	0.350791	0.436814	0.496094	0.496362	0.563199	0.701583	0.747444	0.829999	0.962916	1.04294	1.24023	1.33996	1.58827	1.79905	2.29039	3.50791	6.08364
0	0	0	0	0.0757979	0.142901	0.208183	0.248047	0.248047	0.269288	0.350791	0.439255	0.496094	0.498681	0.564616	0.701583	0.750388	0.832763	0.97307	1.05237	1.24023	1.34032	1.58827	1.82242	2.30994	3.52541	6.1555
0	0	0	0	0.0760688	0.143264	0.208715	0.248047	0.248047	0.269783	0.350791	0.442897	0.496094	0.499611	0.565301	0.701583	0.751078	0.835149	0.975898	1.05237	1.24023	1.34396	1.58827	1.82699	2.3112	3.52541	6.22195
0	0	0	0	0.0760829	0.144227	0.20992	0.248047	0.248047	0.270661	0.350791	0.443151	0.496094	0.501436	0.569642	0.701583	0.752261	0.838148	0.979397	1.05237	1.24023	1.34823	1.58827	1.82827	2.32431	3.53579	6.29357
0	0	0	0	0.0763981	0.144454	0.210402	0.248047	0.248047	0.27103	0.350791	0.448796	0.496094	0.502419	0.571881	0.701583	0.754138	0.843939	0.980228	1.05596	1.24023	1.35006	1.58827	1.84142	2.34007	3.57738	6.32398
0	0	0	0	0.0765675	0.145606	0.211313	0.248047	0.248047	0.27125	0.353734	0.454355	0.496094	0.50413	0.571936	0.701583	0.758181	0.846719	0.981503	1.05757	1.24023	1.35585	1.58827	1.84319	2.34007	3.57738	6.32776
0	0	0	0	0.0766455	0.147448	0.212106	0.248047	0.248047	0.275434	0.355039	0.460413	0.496094	0.505409	0.57597	0.703604	0.759003	0.851946	0.982072	1.06153	1.24023	1.36212	1.58827	1.8567	2.34007	3.60342	6.47086
0	0	0	0	0.0766872	0.150751	0.212582	0.248047	0.248047	0.276576	0.357523	0.462032	0.496094	0.509591	0.580338	0.706311	0.762988	0.855292	0.985805	1.06371	1.24023	1.36302	1.58827	1.86031	2.35074	3.66237	6.53638
0	0	0	0	0.0781691	0.151771	0.215372	0.248047	0.248047	0.277933	0.357996	0.463294	0.496094	0.513034	0.584498	0.710665	0.764309	0.856231	0.988446	1.06542	1.24023	1.3923	1.58827	1.86349	2.35318	3.66368	6.54863
0	0	0	0	0.0793968	0.153114	0.216241	0.248047	0.248047	0.279593	0.358241	0.466004	0.496094	0.520881	0.589841	0.710886	0.764792	0.858014	0.988709	1.06556	1.24023	1.3954	1.59071	1.87556	2.35318	3.68748	6.54987
0	0	0	0	0.0796292	0.154399	0.216374	0.248047	0.248047	0.281354	0.359307	0.470515	0.496094	0.525653	0.592459	0.714156	0.765384	0.862602	0.990393	1.06585	1.24023	1.401	1.60016	1.88907	2.3735	3.68748	6.60476
0	0	0	0	0.0807906	0.154578	0.21698	0.248047	0.248047	0.281518	0.359669	0.471457	0.496094	0.533804	0.604546	0.717163	0.766783	0.8639	0.992188	1.07319	1.24023	1.40317	1.60024	1.88907	2.39914	3.68748	6.60476
0	0	0	0	0.0813772	0.155971	0.219117	0.248047	0.248047	0.283406	0.360254	0.474156	0.496094	0.534414	0.604877	0.717601	0.769748	0.867987	0.992188	1.07659	1.24023	1.42331	1.60275	1.89249	2.44298	3.68748	6.76878
0	0	0	0	0.0815464	0.156193	0.219667	0.248047	0.248047	0.287136	0.363401	0.476657	0.496094	0.53742	0.606349	0.72271	0.769864	0.868419	0.992188	1.08187	1.24023	1.43636	1.60978	1.89857	2.44298	3.68748	6.81113
0	0	0	0	0.0826149	0.158199	0.223989	0.248047	0.248047	0.287988	0.364482	0.478028	0.496094	0.538647	0.607324	0.729272	0.774572	0.868998	0.992188	1.08468	1.24023	1.43811	1.61885	1.90452	2.47119	3.68748	6.81113
0	0	0	0	0.084721	0.158684	0.225238	0.248047	0.248047	0.28871	0.365447	0.478837	0.496094	0.546153	0.60737	0.730893	0.775631	0.870869	0.992188	1.087	1.24023	1.44191	1.62252	1.90655	2.47975	3.7339	6.98506
0	0	0	0	0.0848887	0.159075	0.22537	0.248047	0.248047	0.289492	0.36667	0.47907	0.496094	0.549202	0.607459	0.732307	0.77703	0.871528	0.992188	1.09056	1.24023	1.44635	1.62556	1.91339	2.48047	3.74971	7.02021
0	0	0	0	0.0850668	0.159484	0.226656	0.248047	0.248047	0.290243	0.368845	0.480638	0.496094	0.55032	0.60834	0.733125	0.784393	0.874108	0.992188	1.10232	1.24023	1.44635	1.6324	1.91852	2.48047	3.77049	7.05518
0	0	0	0	0.0875466	0.159643	0.226672	0.248047	0.248047	0.290664	0.368973	0.481251	0.496094	0.55465	0.608712	0.733508	0.784393	0.877947	0.992188	1.1029	1.24023	1.44635	1.6435	1.91991	2.48047	3.77814	7.06457
0	0	0	0	0.0876561	0.160447	0.227364	0.248047	0.248047	0.294101	0.369412	0.483412	0.496094	0.55465	0.609672	0.735264	0.784393	0.88461	0.992188	1.10464	1.24023	1.44635	1.66016	1.92574	2.48047	3.77814	7.23175
0	0	0	0	0.0880242	0.160931	0.228489	0.248047	0.248047	0.29633	0.369434	0.485917	0.496094	0.55465	0.610379	0.737589	0.784393	0.888245	0.992188	1.10477	1.24023	1.44635	1.66395	1.92613	2.48047	3.78627	7.29949
0	0	0	0	0.0893097	0.161268	0.22949	0.248047	0.248047	0.296727	0.372782	0.486435	0.496094	0.55465	0.611261	0.737687	0.784393	0.888462	0.992188	1.1093	1.24023	1.44635	1.66395	1.92715	2.48047	3.79439	7.44141
0	0	0	0	0.0895119	0.16167	0.229939	0.248047	0.248047	0.297068	0.373262	0.487083	0.496094	0.55465	0.615351	0.739788	0.784393	0.889609	0.992188	1.1093	1.24023	1.44635	1.66395	1.93468	2.48047	3.81838	7.44554
0	0	0	0	0.0898615	0.162568	0.230379	0.248047	0.248047	0.297493	0.374645	0.48775	0.496094	0.55465	0.620996	0.743692	0.784393	0.894346	0.992188	1.1093	1.24023	1.44635	1.66395	1.93665	2.48047	3.83416	7.50726
0	0	0	0	0.0899171	0.164409	0.230521	0.248047	0.248047	0.299406	0.375555	0.488905	0.496094	0.55465	0.622418	0.744141	0.784393	0.894346	0.992188	1.1093	1.24023	1.44635	1.66395	1.93731	2.48047	3.87462	7.70544
0	0	0	0.00673962	0.0901899	0.165204	0.231691	0.248047	0.248047	0.29984	0.375873	0.490789	0.496094	0.55465	0.623464	0.744141	0.784393	0.894346	0.992188	1.11391	1.24023	1.44635	1.66757	1.93731	2.48047	3.87462	7.88305
0	0	0	0.0099482	0.0911695	0.165255	0.231724	0.248047	0.248047	0.302917	0.376964	0.491287	0.496094	0.55465	0.624131	0.744141	0.784393	0.894346	0.992188	1.11505	1.24023	1.45416	1.6703	1.93731	2.48047	3.87462	8.09865
0	0	0	0.0108894	0.0924174	0.165896	0.231789	0.248047	0.248047	0.302943	0.377416	0.492807	0.496094	0.55465	0.627309	0.744141	0.784393	0.894346	0.992188	1.11517	1.24469	1.46638	1.68663	1.93731	2.48047	3.87462	8.11003
0	0	0	0.0153834	0.0944534	0.166388	0.23225	0.248047	0.248047	0.305266	0.378767	0.493634	0.496094	0.55465	0.629838	0.744141	0.784393	0.894346	0.992188	1.11812	1.24531	1.47836	1.69652	1.93731	2.48047	3.88255	8.31975
0	0	0	0.0164335	0.0944718	0.166517	0.232599	0.248047	0.248047	0.306013	0.379067	0.495233	0.496094	0.55465	0.637463	0.744141	0.784393	0.894346	0.992188	1.11939	1.25043	1.47846	1.6977	1.93731	2.48047	3.88831	8.31975
0	0	0	0.0191912	0.09464	0.166876	0.234508	0.248047	0.248047	0.306158	0.383125	0.495483	0.496094	0.55465	0.640639	0.744141	0.784393	0.894346	0.992188	1.12415	1.25152	1.48108	1.70485	1.93731	2.48047	3.88982	8.33452
0	0	0	0.019383	0.0948216	0.167124	0.235201	0.248047	0.248047	0.307631	0.384984	0.495933	0.496094	0.55465	0.641249	0.744141	0.784393	0.894346	0.992188	1.12561	1.2648	1.48138	1.7057	1.93731	2.48047	3.92197	8.39337
0	0	0	0.0232007	0.0962832	0.167518	0.235455	0.248047	0.248047	0.309098	0.385219	0.496094	0.496094	0.55465	0.645894	0.744141	0.784393	0.894346	0.992188	1.12571	1.2648	1.48726	1.71193	1.93731	2.48047	3.92197	8.46636
0	0	0	0.0256803	0.097008	0.169111	0.236027	0.248047	0.248047	0.312365	0.386458	0.496094	0.496094	0.55465	0.646788	0.744141	0.784393	0.894346	0.992188	1.12853	1.2648	1.48828	1.71202	1.93731	2.48047	3.94956	8.5243
0	0	0	0.0270306	0.0975441	0.169781	0.237796	0.248047	0.248047	0.312684	0.388039	0.496094	0.496094	0.55465	0.649823	0.744141	0.784393	0.894346	0.992188	1.12864	1.2648	1.48828	1.72326	1.94417	2.48086	3.97106	8.53512
0	0	0	0.029659	0.0976783	0.170879	0.237818	0.248047	0.248047	0.315172	0.388563	0.496094	0.496094	0.55465	0.650635	0.744141	0.784393	0.894445	0.992188	1.1316	1.2648	1.48828	1.72491	1.95588	2.49284	4.00043	8.53512
0	0	0	0.0301257	0.0990193	0.170943	0.238376	0.248047	0.248047	0.316425	0.390002	0.496094	0.496094	0.55465	0.651805	0.744141	0.784393	0.90071	0.992188	1.13912	1.2648	1.48828	1.72809	1.975	2.49284	4.00878	8.65325
0	0	0	0.0314768	0.100629	0.171016	0.239284	0.248047	0.248047	0.316619	0.391926	0.496094	0.496094	0.55465	0.654103	0.744141	0.785635	0.90953	0.99434	1.14464	1.2648	1.48828	1.72864	1.98438	2.49284	4.04986	8.65325
0	0	0	0.0323948	0.100782	0.171363	0.239531	0.248047	0.248047	0.319555	0.39357	0.496094	0.496094	0.55465	0.655971	0.744141	0.788931	0.911305	0.99635	1.14966	1.2648	1.48828	1.73633	1.98438	2.49284	4.05333	8.68518
0	0	0	0.0338348	0.101173	0.171412	0.242925	0.248047	0.248047	0.320506	0.394975	0.496094	0.496094	0.55465	0.656371	0.744141	0.790987	0.913844	1.00055	1.1553	1.2648	1.48828	1.73633	1.98438	2.49322	4.06827	8.94346
0	0	0	0.0350497	0.101394	0.171687	0.244587	0.248047	0.248047	0.323139	0.395047	0.496094	0.496094	0.55465	0.656499	0.744141	0.79563	0.913865	1.0019	1.15667	1.2648	1.48828	1.73633	1.98438	2.52959	4.09089	8.96407
0	0	0	0.0352785	0.105576	0.173162	0.244663	0.248047	0.248047	0.323275	0.398127	0.496094	0.496094	0.55465	0.658971	0.744141	0.798719	0.914585	1.00265	1.16318	1.2648	1.48828	1.73633	1.98438	2.53447	4.09401	9.17773
0	0	0	0.0358093	0.106467	0.173887	0.244765	0.248047	0.248047	0.324129	0.398913	0.496094	0.496094	0.55465	0.665755	0.744141	0.79892	0.916354	1.00561	1.16332	1.26911	1.48828	1.73633	1.98438	2.53463	4.12832	9.58437
0	0	0	0.0386502	0.106842	0.174599	0.245549	0.248047	0.248047	0.32632	0.399395	0.496094	0.496094	0.55465	0.667098	0.744141	0.798945	0.918095	1.00631	1.16406	1.27919	1.48828	1.73633	1.98438	2.5538	4.13188	9.75301
0	0	0	0.0394238	0.107508	0.175605	0.247927	0.248047	0.248047	0.327605	0.399949	0.496094	0.496094	0.55465	0.66764	0.744141	0.802871	0.918336	1.00716	1.16829	1.27934	1.48828	1.73633	1.98438	2.5538	4.13576	9.81275
0	0	0	0.0396761	0.108498	0.175968	0.248047	0.248047	0.248047	0.328424	0.400778	0.496094	0.496094	0.55465	0.671294	0.744141	0.804567	0.918686	1.00942	1.17166	1.28616	1.48828	1.73633	1.99339	2.5538	4.15802	10.0329
0	0	0	0.0398411	0.108599	0.176731	0.248047	0.248047	0.248047	0.331693	0.405457	0.496094	0.496094	0.55465	0.672514	0.744141	0.805129	0.919425	1.01148	1.17279	1.28665	1.48828	1.73633	1.99649	2.5538	4.15802	10.4651
0	0	0	0.040193	0.108775	0.178309	0.248047	0.248047	0.248047	0.332996	0.405763	0.496094	0.496094	0.55465	0.673901	0.744141	0.812814	0.922605	1.01425	1.17305	1.28822	1.48828	1.73662	1.99878	2.5538	4.15802	10.9815
0	0	0	0.0402679	0.109129	0.178714	0.248047	0.248047	0.248047	0.333123	0.406771	0.496094	0.496094	0.55465	0.675506	0.744141	0.812935	0.922738	1.01437	1.18372	1.28883	1.48828	1.74052	1.99982	2.5538	4.15802	11.1649
0	0	0	0.0404866	0.109533	0.178907	0.248047	0.248047	0.248047	0.3345	0.408854	0.496094	0.496094	0.55465	0.676039	0.744141	0.813644	0.924275	1.01708	1.18567	1.28959	1.48828	1.74921	1.99982	2.5538	4.20159	11.6767
0	0	0	0.0413785	0.109571	0.180253	0.248047	0.248047	0.248047	0.336063	0.411325	0.496094	0.496094	0.55465	0.680816	0.744141	0.814228	0.926861	1.01715	1.20246	1.28969	1.48828	1.75158	2.0092	2.58969	4.2095	12.3152
0	0	0	0.0418319	0.109749	0.180768	0.248047	0.248047	0.248047	0.33687	0.413431	0.496094	0.496094	0.55465	0.6879	0.744141	0.81615	0.9271	1.02002	1.20321	1.30326	1.48828	1.75396	2.01906	2.59875	4.2095	12.4246
0	0	0	0.0421543	0.111602	0.181206	0.248047	0.248047	0.248047	0.338275	0.415485	0.496094	0.496094	0.55639	0.689725	0.744141	0.81666	0.936194	1.02127	1.20652	1.31456	1.49396	1.75396	2.01919	2.6035	4.22409	12.6309
0	0	0	0.0440856	0.114904	0.182375	0.248047	0.248047	0.248047	0.339803	0.415696	0.496094	0.496094	0.559671	0.693001	0.744141	0.817453	0.940671	1.02272	1.21159	1.31804	1.49772	1.75396	2.0309	2.66428	4.22409	12.6528
0	0	0	0.0441511	0.115074	0.183259	0.248047	0.248047	0.249342	0.340044	0.415927	0.496094	0.496094	0.561678	0.693081	0.744141	0.820906	0.940862	1.02272	1.21271	1.32144	1.50227	1.75396	2.04107	2.67155	4.25779	12.7858
0	0	0	0.0444518	0.115312	0.183376	0.248047	0.248047	0.249661	0.343199	0.41613	0.496094	0.496317	0.562549	0.694249	0.744141	0.826644	0.941035	1.02272	1.21563	1.33519	1.50264	1.75396	2.04545	2.67155	4.26756	12.8051
0	0	0	0.0449838	0.115324	0.186624	0.248047	0.248047	0.249918	0.347443	0.417566	0.496094	0.499799	0.562745	0.694905	0.744141	0.828579	0.944711	1.02272	1.22437	1.33577	1.50881	1.75396	2.04545	2.6749	4.26756	12.9959
0	0	0	0.0461624	0.115879	0.186779	0.248047	0.248047	0.250416	0.347662	0.418583	0.496094	0.504836	0.568828	0.696201	0.744141	0.829183	0.94683	1.02272	1.22446	1.33577	1.50881	1.75396	2.05659	2.68304	4.26756	13.0902
0	0	0	0.0462662	0.118393	0.189024	0.248047	0.248047	0.253264	0.349517	0.418781	0.496094	0.509864	0.573104	0.700182	0.744141	0.830179	0.948198	1.02272	1.23101	1.33577	1.50881	1.75396	2.09671	2.68304	4.26756	13.0902
0	0	0	0.0475034	0.118553	0.189026	0.248047	0.248047	0.253297	0.349653	0.419836	0.496094	0.514661	0.573488	0.701583	0.744141	0.832685	0.950427	1.02272	1.24023	1.33577	1.50881	1.75396	2.10475	2.68715	4.26756	13.0996
0	0	0	0.0475296	0.121747	0.191413	0.248047	0.248047	0.253492	0.35046	0.419897	0.496094	0.515966	0.576332	0.701583	0.744141	0.837437	0.950787	1.02272	1.24023	1.33577	1.50881	1.75396	2.10475	2.7284	4.26756	13.4152
0	0	0	0.0506906	0.122045	0.19144	0.248047	0.248047	0.255487	0.350791	0.421233	0.496094	0.518415	0.578318	0.701583	0.744141	0.838152	0.95144	1.02272	1.24023	1.33577	1.51427	1.75396	2.11079	2.72852	4.31221	13.4244
0	0	0	0.0535961	0.123666	0.192012	0.248047	0.248047	0.259107	0.350791	0.421432	0.496094	0.522004	0.5811	0.701583	0.744141	0.838238	0.95851	1.02272	1.24023	1.33577	1.51557	1.75396	2.11931	2.72852	4.33905	13.5793
0	0	0	0.0545028	0.123922	0.192167	0.248047	0.248047	0.25986	0.350791	0.424344	0.496094	0.522365	0.581191	0.701583	0.744141	0.843439	0.959335	1.02272	1.24023	1.33577	1.52114	1.75396	2.11931	2.73977	4.3642	13.6223
0	0	0	0.0549123	0.124257	0.19219	0.248047	0.248047	0.261176	0.350791	0.42578	0.496094	0.523417	0.581732	0.701583	0.744141	0.843463	0.95983	1.02452	1.24023	1.33577	1.5258	1.75396	2.12418	2.73977	4.37609	13.7839
0	0	0	0.055315	0.125777	0.193905	0.248047	0.248047	0.262935	0.350791	0.428253	0.496094	0.537005	0.581868	0.701583	0.744141	0.84675	0.962096	1.02684	1.24023	1.33577	1.52875	1.75396	2.13378	2.73977	4.3884	14.8601
0	0	0	0.0558426	0.128685	0.194976	0.248047	0.248047	0.263411	0.350791	0.432651	0.496094	0.538853	0.585275	0.701583	0.744141	0.847496	0.964002	1.02721	1.24023	1.33577	1.5379	1.75396	2.13378	2.73977	4.41635	14.9755
0	0	0	0.057235	0.128833	0.196183	0.248047	0.248047	0.265305	0.350791	0.433257	0.496094	0.540226	0.588845	0.701583	0.744141	0.849139	0.969082	1.02776	1.24023	1.33577	1.5408	1.75396	2.13378	2.77325	4.43672	15.0905
0	0	0	0.0575374	0.12903	0.197085	0.248047	0.248047	0.267005	0.350791	0.438628	0.496094	0.541095	0.59084	0.701583	0.744163	0.852075	0.971125	1.02935	1.24023	1.33649	1.55174	1.75396	2.13378	2.77325	4.47173	15.4209
0	0	0	0.0576938	0.129738	0.197869	0.248047	0.248047	0.268083	0.350791	0.442073	0.496094	0.54266	0.592492	0.701583	0.749455	0.852737	0.971463	1.03284	1.24023	1.34078	1.55449	1.75396	2.13378	2.77325	4.47173	16.0312
0	0	0	0.057835	0.130447	0.198418	0.248047	0.248047	0.268915	0.350791	0.443453	0.496094	0.544526	0.597545	0.702484	0.749591	0.853242	0.978239	1.03466	1.24023	1.34904	1.55947	1.75396	2.13378	2.77325	4.47173	16.1724
0	0	0	0.0578545	0.1305	0.198561	0.248047	0.248047	0.269851	0.350791	0.4435	0.496094	0.553036	0.598562	0.708602	0.75038	0.859229	0.980453	1.03636	1.24023	1.3523	1.56228	1.75396	2.13378	2.77325	4.47173	16.5821
0	0	0	0.0588979	0.131472	0.198877	0.248047	0.248047	0.270638	0.350791	0.444996	0.496094	0.554154	0.601979	0.709752	0.751902	0.862691	0.984077	1.04066	1.24023	1.35742	1.56752	1.75396	2.14633	2.77325	4.47173	17.0571
0	0	0	0.0589346	0.131474	0.199158	0.248047	0.248047	0.271299	0.350791	0.445261	0.496094	0.55465	0.607424	0.710665	0.75383	0.866305	0.988627	1.04144	1.24023	1.35845	1.56879	1.75396	2.18838	2.77325	4.48919	17.2031
0	0	0	0.0598698	0.131811	0.199562	0.248047	0.248047	0.271677	0.350791	0.449325	0.496094	0.55465	0.607461	0.711189	0.754989	0.872573	0.990989	1.05237	1.24023	1.36108	1.56879	1.75396	2.1949	2.77325	4.56029	17.3863
0	0	0	0.0599589	0.131869	0.20092	0.248047	0.248047	0.274266	0.350791	0.449645	0.496094	0.55465	0.609376	0.714018	0.762124	0.87389	0.99166	1.05237	1.24023	1.36148	1.57087	1.75396	2.19501	2.77325	4.57376	17.6967
0	0	0	0.0600131	0.132055	0.201167	0.248047	0.248047	0.274281	0.350791	0.450541	0.496094	0.55465	0.614254	0.714967	0.766051	0.876052	0.992188	1.05237	1.24023	1.36791	1.57181	1.75396	2.2186	2.80664	4.58456
0	0	0	0.0601341	0.132946	0.202306	0.248047	0.248047	0.274601	0.350791	0.452465	0.496094	0.55465	0.616632	0.715971	0.768071	0.876649	0.992188	1.05237	1.24023	1.38149	1.57815	1.75396	2.2186	2.82817	4.59043
0	0	0	0.0609693	0.133301	0.202574	0.248047	0.248047	0.274924	0.350791	0.453378	0.496094	0.55465	0.620246	0.72095	0.776094	0.880383	0.992188	1.05237	1.24023	1.38272	1.58786	1.75396	2.23242	2.82817	4.59719
0	0	0	0.0622762	0.133443	0.20458	0.248047	0.248047	0.27544	0.350791	0.4535	0.496094	0.55465	0.624224	0.72271	0.777171	0.882046	0.992188	1.05772	1.24023	1.38572	1.58827	1.75396	2.23242	2.84381	4.61394
0	0	0	0.0629152	0.133548	0.204907	0.248047	0.248047	0.276388	0.350791	0.45433	0.496094	0.55465	0.624694	0.72521	0.781374	0.882661	0.992188	1.05967	1.24023	1.3877	1.58827	1.75396	2.23242	2.8927	4.6339
0	0	0	0.0634418	0.134296	0.205086	0.248047	0.248047	0.276679	0.350791	0.455567	0.496094	0.55465	0.631594	0.726348	0.781459	0.883802	0.992188	1.06438	1.24023	1.39185	1.58827	1.75396	2.23242	2.90331	4.65005
0	0	0	0.0634521	0.134721	0.205444	0.248047	0.248047	0.278041	0.350791	0.456677	0.496094	0.55465	0.631829	0.729773	0.783765	0.884446	0.992188	1.07294	1.24023	1.39726	1.58827	1.75396	2.23242	2.99716	4.68195
0	0	0	0.063655	0.135047	0.20551	0.248047	0.248047	0.278339	0.350791	0.458335	0.496094	0.55465	0.634133	0.730599	0.784393	0.885032	0.992188	1.07373	1.24023	1.40253	1.58827	1.75396	2.23242	2.99716	4.70059
0	0	0	0.0637285	0.135071	0.206475	0.248047	0.248047	0.279383	0.350975	0.460539	0.496094	0.55465	0.638252	0.732336	0.784393	0.890111	0.992188	1.07418	1.24023	1.40317	1.58827	1.75396	2.23242	2.99716	4.72891
0	0	0	0.0639357	0.135653	0.20695	0.248047	0.248047	0.279466	0.353082	0.463866	0.496094	0.55465	0.64191	0.733896	0.784393	0.892795	0.992188	1.07421	1.24023	1.40317	1.58827	1.75396	2.23242	3.00359	4.73196
0	0	0	0.064173	0.13818	0.207214	0.248047	0.248047	0.279656	0.354092	0.464068	0.496094	0.55465	0.644066	0.73428	0.784393	0.894346	0.992188	1.08263	1.24023	1.41108	1.58827	1.76184	2.23242	3.02024	4.73249
0	0	0	0.0642811	0.138456	0.207246	0.248047	0.248047	0.279814	0.356153	0.464205	0.496094	0.55465	0.645283	0.73518	0.784393	0.894346	0.992188	1.08795	1.24023	1.41732	1.58827	1.77961	2.23242	3.0278	4.73893
0	0	0	0.0649847	0.138652	0.207607	0.248047	0.248047	0.279866	0.357266	0.46683	0.496094	0.55465	0.646113	0.73984	0.784393	0.894346	0.992188	1.08812	1.24023	1.42062	1.58827	1.78294	2.2372	3.0278	4.75834
0	0	0	0.0650365	0.139532	0.208012	0.248047	0.248047	0.282853	0.360006	0.467779	0.496094	0.55465	0.646768	0.740113	0.784393	0.894346	0.992188	1.08815	1.24023	1.4266	1.58827	1.78776	2.24616	3.06817	4.76482
0	0	0	0.0651241	0.140121	0.208549	0.248047	0.248047	0.285525	0.360322	0.468343	0.496094	0.55465	0.647591	0.742629	0.784393	0.894346	0.992188	1.09337	1.24023	1.4344	1.58827	1.78869	2.24616	3.09822	4.77578
0	0	0	0.0654623	0.142241	0.208591	0.248047	0.248047	0.286478	0.360818	0.470483	0.496094	0.55465	0.64797	0.743414	0.784393	0.894346	0.992188	1.09397	1.24023	1.43484	1.58827	1.78869	2.24616	3.10802	4.78755
0	0	0	0.0658387	0.142399	0.208726	0.248047	0.248047	0.287196	0.360909	0.470998	0.496094	0.55465	0.650081	0.744141	0.784393	0.894346	0.992188	1.09762	1.24023	1.44101	1.58827	1.79014	2.24645	3.12733	4.78988
0	0	0	0.0662899	0.143441	0.208797	0.248047	0.248047	0.290289	0.362189	0.47215	0.496094	0.55465	0.65025	0.744141	0.784393	0.894346	0.992188	1.09858	1.24023	1.44635	1.58827	1.79587	2.2687	3.13757	4.79058
0	0	0	0.0672048	0.143716	0.210223	0.248047	0.248047	0.291009	0.362686	0.473088	0.496094	0.55465	0.653628	0.744141	0.784393	0.894346	0.992188	1.10876	1.24023	1.44635	1.59221	1.79887	2.27497	3.17655	4.8162
0	0	0	0.0698881	0.145653	0.21055	0.248047	0.248047	0.291342	0.363163	0.473848	0.496094	0.55465	0.654742	0.744141	0.784393	0.894346	0.992188	1.1093	1.24023	1.44635	1.59451	1.80428	2.28635	3.17655	4.83193
0	0	0	0.0710822	0.147573	0.212386	0.248047	0.248047	0.29255	0.364214	0.474667	0.496094	0.55465	0.656123	0.744141	0.784393	0.894346	0.992188	1.1093	1.24023	1.44635	1.59927	1.80581	2.28688	3.17655	4.86405
0	0	0	0.0711104	0.148612	0.212438	0.248047	0.248047	0.293404	0.366632	0.477155	0.496094	0.55465	0.656762	0.744141	0.784393	0.894346	0.992188	1.1093	1.24023	1.44635	1.60219	1.80581	2.29039	3.17655	4.87335
0	0	0	0.0712172	0.148879	0.213485	0.248047	0.248047	0.293426	0.367489	0.477779	0.496094	0.55465	0.658331	0.744141	0.784393	0.894346	0.992188	1.1093	1.24023	1.44635	1.60532	1.80581	2.29294	3.23414	4.88596
0	0	0	0.0713406	0.149953	0.213682	0.248047	0.248047	0.294222	0.367719	0.477913	0.496094	0.55465	0.660845	0.744141	0.784393	0.894346	0.992188	1.1093	1.24023	1.44635	1.60553	1.80581	2.29331	3.23414	4.91049
0	0	0	0.071824	0.150252	0.215212	0.248047	0.248047	0.294817	0.36816	0.479534	0.496094	0.55465	0.66185	0.744141	0.784393	0.894346	0.992188	1.1093	1.24023	1.44635	1.60836	1.81421	2.32577	3.3279	4.92359
0	0	0	0.0727756	0.150873	0.215469	0.248047	0.248047	0.295349	0.369197	0.479899	0.496094	0.55465	0.665787	0.744141	0.784393	0.894346	0.992188	1.1093	1.24023	1.44635	1.60978	1.81814	2.33991	3.32882	4.9423
0	0	0	0.0731083	0.151402	0.216233	0.248047	0.248047	0.296411	0.369576	0.479956	0.496094	0.55465	0.665854	0.744141	0.784393	0.894346	0.993646	1.1093	1.24023	1.44635	1.61012	1.83194	2.34007	3.33713	4.94638
0	0	0.0101745	0.0746853	0.15204	0.218114	0.248047	0.248047	0.297865	0.370006	0.481434	0.496094	0.55465	0.666501	0.744141	0.784393	0.894346	0.9963	1.1093	1.24023	1.44635	1.6146	1.84142	2.34007	3.33713	4.9523
0	0	0.0102069	0.0749703	0.154034	0.218247	0.248047	0.248047	0.29884	0.37042	0.481536	0.496094	0.559029	0.667052	0.744141	0.784393	0.894346	0.996745	1.1093	1.24023	1.44635	1.61574	1.84479	2.34007	3.33713	4.96094
0	0	0.0136144	0.0749777	0.155525	0.219717	0.248047	0.248047	0.298989	0.371083	0.482714	0.496094	0.559412	0.671146	0.744141	0.784393	0.894346	0.997241	1.11301	1.24023	1.44635	1.62147	1.85243	2.35318	3.33713	4.96094
0	0	0.0151557	0.075125	0.155638	0.219761	0.248047	0.248047	0.300668	0.371909	0.490492	0.496094	0.560242	0.673642	0.744141	0.784393	0.894346	0.99803	1.11558	1.24023	1.44854	1.62305	1.85676	2.35318	3.33713	4.96713
0	0	0.0193063	0.0756418	0.156547	0.220742	0.248047	0.248047	0.302758	0.373033	0.490667	0.496094	0.562353	0.675727	0.744141	0.784393	0.894346	0.998162	1.13171	1.24023	1.45187	1.626	1.86031	2.35318	3.33784	5.01971
0	0	0.0210372	0.0758846	0.156908	0.221137	0.248047	0.248047	0.303289	0.375151	0.490836	0.496094	0.563184	0.675999	0.744141	0.784393	0.894346	1.00173	1.13202	1.24023	1.45313	1.6309	1.86294	2.39914	3.3738	5.02257
0	0	0.0215505	0.0761234	0.157123	0.221209	0.248047	0.248047	0.304309	0.377617	0.491534	0.496094	0.563525	0.678902	0.744141	0.784393	0.894346	1.00797	1.1334	1.24023	1.4665	1.63217	1.8637	2.43611	3.3738	5.0895
0	0	0.022019	0.0761508	0.157386	0.221564	0.248047	0.248047	0.304583	0.37786	0.493547	0.496094	0.56353	0.678913	0.744141	0.785466	0.894346	1.00836	1.13447	1.24023	1.46949	1.6412	1.88907	2.44298	3.3738	5.0895
0	0	0.0220504	0.076357	0.157958	0.222059	0.248047	0.248047	0.304675	0.378426	0.494126	0.496094	0.564984	0.68243	0.744141	0.789178	0.894346	1.01017	1.13895	1.24023	1.47312	1.64254	1.88907	2.44298	3.43158	5.0895
0	0	0.0229376	0.0771602	0.15934	0.222204	0.248047	0.248047	0.307427	0.380839	0.496094	0.496094	0.565794	0.682435	0.744141	0.79186	0.894346	1.01207	1.1419	1.24023	1.4865	1.65011	1.88907	2.44529	3.44598	5.11362
0	0	0.0238177	0.0772715	0.159653	0.222473	0.248047	0.248047	0.309119	0.381348	0.496094	0.496094	0.566796	0.683544	0.744141	0.793564	0.894898	1.01222	1.14587	1.24023	1.48726	1.65477	1.89044	2.48047	3.45646	5.12765
0	0	0.0238863	0.0786268	0.160881	0.222536	0.248047	0.248047	0.311656	0.382906	0.496094	0.496094	0.567127	0.687417	0.744141	0.793827	0.895873	1.01331	1.14663	1.24697	1.48828	1.66395	1.90353	2.48047	3.46225	5.17937
0	0	0.0262007	0.0789305	0.161241	0.22299	0.248047	0.248047	0.311662	0.387233	0.496094	0.496141	0.568055	0.68808	0.744141	0.79512	0.899084	1.0146	1.14815	1.25036	1.48828	1.66395	1.90545	2.48047	3.46382	5.21489
0	0	0.027479	0.0792087	0.161516	0.223198	0.248047	0.248047	0.31225	0.387628	0.496094	0.497245	0.569833	0.689847	0.744141	0.795804	0.899146	1.01493	1.15225	1.25235	1.48828	1.66395	1.90931	2.48047	3.46527	5.21489
0	0	0.0276931	0.0802116	0.163207	0.224276	0.248047	0.248047	0.313343	0.388307	0.496094	0.498973	0.572301	0.691995	0.744141	0.796466	0.902261	1.01527	1.15231	1.25385	1.48828	1.66395	1.92014	2.48047	3.50791	5.25231
0	0	0.0278357	0.081623	0.163318	0.226692	0.248047	0.248047	0.317327	0.389622	0.496094	0.505285	0.572824	0.692988	0.744141	0.797268	0.903663	1.02038	1.1531	1.25415	1.48828	1.66395	1.92713	2.48047	3.50791	5.26187
0	0	0.0280337	0.0816954	0.163458	0.227887	0.248047	0.248047	0.318145	0.389649	0.496094	0.50807	0.577717	0.694369	0.744141	0.798939	0.905037	1.02109	1.1555	1.25909	1.48828	1.66395	1.93731	2.48047	3.50791	5.26187
0	0	0.0287649	0.0823101	0.163656	0.229005	0.248047	0.248047	0.319731	0.393908	0.496094	0.50892	0.577742	0.696627	0.744141	0.80011	0.90504	1.02271	1.15901	1.26298	1.48828	1.66395	1.93731	2.48047	3.52541	5.27355
0	0	0.0306167	0.0824726	0.164873	0.229237	0.248047	0.248047	0.32083	0.395717	0.496094	0.509241	0.578981	0.698178	0.744141	0.804909	0.905794	1.02272	1.1679	1.2648	1.48828	1.66395	1.93731	2.48047	3.52541	5.3546
0	0	0.0315561	0.0825587	0.165009	0.229633	0.248047	0.248047	0.321598	0.399949	0.496094	0.509835	0.579023	0.699173	0.744141	0.804953	0.906472	1.02272	1.1713	1.2648	1.48828	1.66395	1.93731	2.48047	3.52642	5.36181
0	0	0.0327356	0.0835289	0.168117	0.229874	0.248047	0.248047	0.321683	0.403022	0.496094	0.510005	0.579989	0.699906	0.744141	0.807454	0.907063	1.02272	1.1769	1.2648	1.48828	1.66416	1.93731	2.48047	3.55149	5.39195
0	0	0.0327596	0.0836953	0.168935	0.230942	0.248047	0.248047	0.32228	0.403577	0.496094	0.510364	0.586493	0.701031	0.744141	0.807966	0.908847	1.02272	1.17725	1.2648	1.48828	1.66992	1.93731	2.48047	3.55149	5.47953
0	0	0.032761	0.0842084	0.169109	0.230962	0.248047	0.248047	0.322309	0.405938	0.496094	0.511021	0.588529	0.701409	0.744141	0.809416	0.909215	1.02272	1.18076	1.2648	1.48828	1.68772	1.95736	2.48047	3.57738	5.50753
0	0	0.0327631	0.0851845	0.16987	0.23168	0.248047	0.248047	0.323602	0.407228	0.496094	0.511142	0.58925	0.701583	0.744141	0.809771	0.913095	1.02272	1.18147	1.2648	1.48828	1.69169	1.96381	2.48047	3.59125	5.5465
0	0	0.0328416	0.0867393	0.169969	0.23248	0.248047	0.248047	0.323905	0.40866	0.496094	0.513294	0.591049	0.701583	0.744141	0.81559	0.916691	1.02272	1.18316	1.2648	1.48828	1.69447	1.96828	2.48047	3.60988	5.5465
0	0	0.0329569	0.0879434	0.171014	0.232928	0.248047	0.248047	0.326061	0.408848	0.496094	0.513391	0.593703	0.701583	0.744141	0.816467	0.917096	1.02272	1.18319	1.2648	1.48828	1.70278	1.98438	2.48047	3.61162	5.66178
0	0	0.0329912	0.08835	0.171077	0.233117	0.248047	0.248047	0.326926	0.40904	0.496094	0.514207	0.595829	0.701583	0.744141	0.817139	0.921388	1.02272	1.1832	1.2648	1.48828	1.70449	1.98438	2.48047	3.61162	5.68539
0	0	0.0330284	0.0886292	0.171852	0.23314	0.248047	0.248047	0.327092	0.40978	0.496094	0.515158	0.597322	0.701583	0.744141	0.821085	0.922836	1.02272	1.19221	1.2648	1.48828	1.70609	1.98438	2.48047	3.61815	5.69676
0	0	0.0334847	0.0887663	0.172456	0.233201	0.248047	0.249082	0.328823	0.410963	0.496094	0.518331	0.598494	0.701583	0.744141	0.824108	0.923652	1.02272	1.19788	1.2648	1.48828	1.71126	1.98438	2.48047	3.68294	5.70976
0	0	0.034589	0.0889053	0.1734	0.233261	0.248047	0.249143	0.330364	0.411908	0.496094	0.520025	0.598699	0.701583	0.744141	0.824472	0.925362	1.02272	1.20606	1.2648	1.48828	1.71434	1.98438	2.48047	3.68748	5.7534
0	0	0.035255	0.0891341	0.174118	0.233828	0.248047	0.250074	0.331176	0.412686	0.496094	0.520226	0.599191	0.701583	0.744141	0.826836	0.925459	1.02981	1.20795	1.2648	1.48828	1.72015	1.98438	2.48047	3.68748	5.77525
0	0	0.0357196	0.0915441	0.175771	0.234628	0.248047	0.251847	0.331391	0.413947	0.496094	0.521202	0.601304	0.701583	0.744141	0.827492	0.926974	1.03082	1.20806	1.2648	1.48853	1.73143	1.98438	2.49078	3.68748	5.77984
0	0	0.0367756	0.0916977	0.176384	0.235261	0.248047	0.254026	0.333174	0.414675	0.496094	0.5219	0.601729	0.701583	0.744141	0.829368	0.927756	1.03399	1.20885	1.2648	1.49012	1.73633	1.98438	2.49273	3.69389	5.83833
0	0	0.0370728	0.0921109	0.176541	0.23532	0.248047	0.254745	0.333316	0.41501	0.496094	0.524354	0.604145	0.701583	0.744141	0.830336	0.930553	1.03869	1.20943	1.2648	1.49107	1.73633	1.98593	2.49284	3.7207	5.85412
0	0	0.038114	0.0940886	0.176925	0.235335	0.248047	0.255149	0.333958	0.41609	0.496094	0.528728	0.606343	0.701583	0.745512	0.833329	0.933517	1.04153	1.21817	1.2648	1.49263	1.73633	1.99508	2.49284	3.7207	5.8944
0	0	0.0383327	0.0943826	0.177242	0.235809	0.248047	0.25786	0.335253	0.417592	0.496094	0.531461	0.607716	0.701583	0.749988	0.835813	0.934595	1.04561	1.22551	1.27154	1.49772	1.73633	1.99509	2.49284	3.73385	5.97476
0	0	0.039076	0.0945417	0.177242	0.236782	0.248047	0.257934	0.336945	0.420464	0.496094	0.532532	0.608633	0.701583	0.753455	0.836511	0.937795	1.04788	1.23292	1.27527	1.50264	1.73633	1.99982	2.49284	3.74373	6.1142
0	0	0.0401821	0.0949461	0.177301	0.23693	0.248047	0.25895	0.337655	0.420467	0.496094	0.534904	0.612457	0.703659	0.75348	0.836558	0.937807	1.04884	1.23753	1.27578	1.50478	1.73633	1.99982	2.49284	3.75419	6.13979
0	0	0.0402465	0.0951455	0.177453	0.238046	0.248047	0.259635	0.339912	0.420634	0.496094	0.536736	0.613443	0.705825	0.754307	0.836591	0.939611	1.05207	1.24023	1.27595	1.50509	1.73633	1.99982	2.49284	3.75651	6.20117
0	0	0.0405524	0.0955097	0.177677	0.23811	0.248047	0.261126	0.340824	0.420817	0.496094	0.537434	0.613873	0.707088	0.757279	0.836802	0.940329	1.05237	1.24023	1.29205	1.50528	1.73633	1.99982	2.52959	3.76794	6.21604
0	0	0.0407345	0.0958116	0.178562	0.238486	0.248047	0.262003	0.343693	0.421148	0.496094	0.539737	0.61871	0.707894	0.759337	0.83701	0.940938	1.05237	1.24023	1.30173	1.50881	1.73633	1.99982	2.52959	3.80607	6.25306
0	0	0.0424452	0.0960784	0.178687	0.239163	0.248047	0.262742	0.344477	0.422197	0.496094	0.540096	0.619412	0.710934	0.763151	0.839244	0.958025	1.05237	1.24023	1.3031	1.50881	1.73633	1.99982	2.52959	3.81686	6.31338
0	0	0.0434126	0.0975339	0.179023	0.239445	0.248047	0.262823	0.347317	0.422717	0.496094	0.543232	0.619939	0.711138	0.763493	0.844098	0.958183	1.05237	1.24023	1.30336	1.50881	1.73633	1.99982	2.53427	3.82072	6.35046
0	0	0.043667	0.0981095	0.179141	0.239512	0.248047	0.264832	0.347507	0.423182	0.496094	0.547166	0.620578	0.711951	0.763502	0.845875	0.962338	1.05237	1.24023	1.30709	1.50881	1.74516	1.99982	2.54883	3.83234	6.36476
0	0	0.0465967	0.0989859	0.180026	0.239596	0.248047	0.265041	0.35031	0.424027	0.496094	0.548735	0.620967	0.712582	0.765205	0.848998	0.967076	1.05237	1.24023	1.31001	1.50881	1.75051	1.99982	2.5531	3.85072	6.42291
0	0	0.0467136	0.0991705	0.180412	0.239864	0.248047	0.265514	0.350545	0.425217	0.496094	0.55002	0.621453	0.71273	0.766966	0.849076	0.968032	1.05237	1.24023	1.31297	1.50881	1.75229	1.99982	2.5538	3.85072	6.46526
0	0	0.0485222	0.0998888	0.18097	0.240609	0.248047	0.265783	0.350791	0.42578	0.496094	0.550057	0.624599	0.714876	0.767521	0.85093	0.968461	1.05237	1.24023	1.3144	1.50881	1.75396	2.02195	2.5538	3.8587	6.46827
0	0	0.0488843	0.0999657	0.181943	0.242937	0.248047	0.266382	0.350791	0.426149	0.496094	0.55465	0.627066	0.71532	0.768002	0.856746	0.972423	1.05237	1.24023	1.31806	1.50881	1.75396	2.031	2.5538	3.8587	6.52509
0	0	0.049773	0.100736	0.183223	0.24318	0.248047	0.267038	0.350791	0.426559	0.496094	0.55465	0.62732	0.718346	0.76808	0.859879	0.972643	1.05237	1.24023	1.31817	1.51483	1.75396	2.03938	2.5538	3.87462	6.55139
0	0	0.050248	0.101489	0.183224	0.244095	0.248047	0.267058	0.350791	0.427187	0.496094	0.55465	0.629422	0.719328	0.768869	0.862402	0.972832	1.05385	1.24023	1.33577	1.51557	1.75396	2.04122	2.5538	3.87462	6.56739
0	0	0.0502846	0.101956	0.18337	0.244888	0.248047	0.267222	0.350791	0.427392	0.496094	0.55465	0.630432	0.721859	0.770231	0.862419	0.973014	1.06628	1.24023	1.33577	1.52663	1.75396	2.04456	2.5538	3.87462	6.60476
0	0	0.0504731	0.102668	0.183486	0.245332	0.248047	0.267418	0.350791	0.427782	0.496094	0.55465	0.630682	0.72188	0.772138	0.863634	0.973169	1.06719	1.24023	1.33577	1.52966	1.75396	2.04545	2.5538	3.87462	6.67887
0	0	0.0505987	0.102673	0.18418	0.245743	0.248047	0.267432	0.350791	0.42934	0.496094	0.55465	0.632024	0.722227	0.773445	0.864622	0.973324	1.06869	1.24023	1.33577	1.54127	1.75396	2.04545	2.5538	3.89181	6.73848
0	0	0.0508806	0.103895	0.184338	0.245905	0.248047	0.270862	0.350791	0.43322	0.496094	0.55465	0.633254	0.72271	0.774995	0.869068	0.973862	1.07108	1.24023	1.33577	1.54243	1.75396	2.05064	2.5538	3.90987	6.7749
0	0	0.0521822	0.10396	0.184613	0.247129	0.248047	0.270995	0.350791	0.435657	0.496094	0.55465	0.63366	0.723943	0.776935	0.872725	0.97527	1.0733	1.24023	1.33577	1.54446	1.75396	2.08194	2.5538	3.92197	6.80467
0	0	0.0522286	0.104674	0.1852	0.247238	0.248047	0.273162	0.350791	0.435919	0.496094	0.55465	0.635258	0.724154	0.778689	0.873627	0.975593	1.07606	1.24023	1.33577	1.54593	1.75396	2.11305	2.58248	3.92197	6.81113
0	0	0.0522851	0.104685	0.185657	0.247445	0.248047	0.273804	0.350791	0.437368	0.496094	0.55465	0.637139	0.724784	0.779336	0.874307	0.977226	1.07708	1.24023	1.33577	1.54646	1.75396	2.11653	2.58439	3.92197	6.81113
0	0	0.0525824	0.105329	0.185818	0.248047	0.248047	0.274424	0.350791	0.438476	0.496094	0.55465	0.637856	0.725332	0.779934	0.874525	0.977323	1.08364	1.24023	1.33577	1.55313	1.75396	2.11931	2.58969	3.92197	6.94974
0	0	0.0527065	0.105462	0.186108	0.248047	0.248047	0.275704	0.350791	0.438848	0.496094	0.55465	0.641666	0.725451	0.78176	0.874893	0.978472	1.08799	1.24023	1.33577	1.55618	1.75396	2.13378	2.59686	3.92197	7.01583
0	0	0.0532209	0.105889	0.187029	0.248047	0.248047	0.276371	0.350791	0.440291	0.496094	0.55465	0.644142	0.725702	0.783826	0.875768	0.987654	1.08981	1.24023	1.33577	1.55828	1.75396	2.13378	2.67155	3.96085	7.02021
0	0	0.0534576	0.106582	0.187091	0.248047	0.248047	0.276383	0.350791	0.440626	0.496094	0.55465	0.644567	0.726772	0.784393	0.876632	0.989914	1.09389	1.24023	1.33577	1.56228	1.75396	2.13378	2.67155	3.96407	7.02021
0	0	0.0536144	0.10725	0.187438	0.248047	0.248047	0.276621	0.350791	0.440669	0.496094	0.55465	0.649851	0.727274	0.784393	0.878438	0.992188	1.09851	1.24023	1.33937	1.56472	1.75396	2.13378	2.67155	3.96996	7.05518
0	0	0.0537176	0.107277	0.187497	0.248047	0.248047	0.27774	0.350791	0.443294	0.496094	0.55465	0.650855	0.730092	0.784393	0.880667	0.992188	1.10225	1.24023	1.34121	1.56752	1.75396	2.13378	2.68304	3.97374	7.10298
0	0	0.0549922	0.108328	0.188537	0.248047	0.248047	0.277915	0.350791	0.443829	0.496094	0.55465	0.653219	0.731281	0.784393	0.881701	0.992188	1.10752	1.24023	1.34148	1.56879	1.75396	2.13378	2.68304	3.97473	7.32894
0	0	0.0551988	0.108505	0.189246	0.248047	0.248047	0.277926	0.350791	0.445283	0.496094	0.55465	0.656066	0.731381	0.784393	0.883729	0.992188	1.10891	1.24023	1.34525	1.56887	1.75396	2.16782	2.68304	3.99571	7.32894
0	0	0.0555351	0.108982	0.189864	0.248047	0.248047	0.278927	0.350791	0.445885	0.496094	0.55465	0.656216	0.73251	0.784393	0.88574	0.992188	1.1093	1.24023	1.35338	1.56891	1.75396	2.17755	2.69678	4.00732	7.44141
0	0	0.0555813	0.109149	0.190225	0.248047	0.248047	0.279469	0.350791	0.446101	0.496094	0.55465	0.657132	0.735888	0.784393	0.88717	0.992188	1.1093	1.24023	1.35567	1.57115	1.75396	2.18471	2.71585	4.00732	7.44141
0	0	0.0558921	0.109367	0.190238	0.248047	0.248047	0.280006	0.350791	0.446239	0.496094	0.55465	0.657232	0.736249	0.784393	0.890601	0.992188	1.1093	1.24023	1.35913	1.57203	1.75396	2.20075	2.77325	4.03791	7.56035
0	0	0.0573376	0.110539	0.190358	0.248047	0.248047	0.280492	0.350791	0.447463	0.496094	0.55465	0.657719	0.736967	0.784393	0.890796	0.992188	1.1093	1.24023	1.36548	1.57362	1.75396	2.21094	2.77325	4.03791	7.65738
0	0	0.0575582	0.1106	0.190408	0.248047	0.248047	0.281278	0.350791	0.448994	0.496094	0.55465	0.658417	0.740714	0.784393	0.891237	0.992188	1.1093	1.24023	1.38056	1.57815	1.75396	2.22017	2.77325	4.04602	7.65738
0	0	0.0577699	0.112159	0.192913	0.248047	0.248047	0.281586	0.350791	0.449802	0.496094	0.55465	0.659228	0.741912	0.784393	0.892278	0.992188	1.1093	1.24023	1.38094	1.57872	1.75396	2.22177	2.77325	4.06144	7.65738
0	0	0.0581585	0.112216	0.192982	0.248047	0.248047	0.28179	0.350791	0.449905	0.496094	0.55465	0.661095	0.741942	0.784393	0.894264	0.992188	1.1093	1.24023	1.38377	1.58111	1.75396	2.23242	2.77325	4.06827	7.70544
0	0	0.0584414	0.112409	0.194149	0.248047	0.248047	0.283514	0.350791	0.450615	0.496094	0.55465	0.663234	0.744141	0.784393	0.894346	0.992188	1.1093	1.24023	1.38395	1.5843	1.75396	2.23242	2.77325	4.06827	7.72538
0	0	0.0585695	0.113621	0.194149	0.248047	0.248047	0.283592	0.350791	0.451318	0.496094	0.55465	0.667854	0.744141	0.784393	0.894346	0.992188	1.1093	1.24023	1.38452	1.58664	1.75396	2.23242	2.77325	4.06827	7.84393
0	0	0.0585844	0.113959	0.194412	0.248047	0.248047	0.285287	0.351628	0.452166	0.496094	0.55465	0.668955	0.744141	0.784393	0.894346	0.992188	1.1093	1.24023	1.38504	1.58827	1.75396	2.23242	2.77325	4.06827	8.00696
0	0	0.0588705	0.114077	0.195004	0.248047	0.248047	0.285322	0.355371	0.453387	0.496094	0.55465	0.669526	0.744141	0.784393	0.894346	0.992188	1.1093	1.24023	1.38848	1.58827	1.75962	2.23242	2.77325	4.06827	8.04911
0	0	0.0595695	0.114139	0.195031	0.248047	0.248047	0.287489	0.355603	0.453442	0.496094	0.55465	0.671021	0.744141	0.784393	0.894346	0.992188	1.1093	1.24023	1.3896	1.58827	1.76536	2.23242	2.77325	4.06827	8.04911
0	0	0.0596553	0.114538	0.195487	0.248047	0.248047	0.288118	0.356154	0.454071	0.496094	0.55465	0.671331	0.744141	0.784393	0.894346	0.992188	1.1093	1.24023	1.39	1.58827	1.78869	2.23242	2.77325	4.08279	8.04911
0	0	0.0605602	0.115108	0.195939	0.248047	0.248047	0.28837	0.35627	0.454398	0.496094	0.55465	0.67163	0.744141	0.784393	0.894346	0.992188	1.1093	1.24023	1.39188	1.58827	1.78869	2.23242	2.80633	4.12582	8.11003
0	0	0.0614007	0.115283	0.196656	0.248047	0.248047	0.289359	0.358682	0.45451	0.496094	0.55465	0.673647	0.744141	0.784393	0.894346	0.992188	1.10947	1.24023	1.39361	1.58827	1.80283	2.23242	2.80696	4.12832	8.1893
0	0	0.0617066	0.116114	0.196751	0.248047	0.248047	0.289429	0.35972	0.460867	0.496094	0.55465	0.674773	0.744141	0.784393	0.894346	0.992188	1.12131	1.24023	1.39485	1.58827	1.80395	2.23242	2.82817	4.13047	8.1893
0	0	0.0622559	0.116641	0.198908	0.248047	0.248047	0.29006	0.359918	0.460948	0.496094	0.55465	0.675351	0.744141	0.785033	0.894346	0.992188	1.12336	1.24023	1.41648	1.58827	1.80581	2.23242	2.82817	4.16911	8.20057
0	0	0.0626726	0.116851	0.199065	0.248047	0.248047	0.290206	0.362189	0.461886	0.496094	0.55465	0.67617	0.744141	0.786925	0.894346	0.992188	1.12531	1.24023	1.41686	1.58827	1.80805	2.23242	2.82817	4.17311	8.31975
0	0	0.0627497	0.117687	0.199941	0.248047	0.248047	0.290497	0.362434	0.461966	0.496094	0.55465	0.676451	0.744141	0.78823	0.894346	0.992188	1.12787	1.24023	1.42284	1.58827	1.81049	2.23823	2.84058	4.2095	8.49176
0	0	0.0630688	0.119131	0.20003	0.248047	0.248047	0.291847	0.362515	0.462112	0.496094	0.556391	0.677163	0.744141	0.791383	0.894346	0.992188	1.12819	1.24023	1.42394	1.58827	1.82204	2.24289	2.87403	4.2101	8.72406
0	0	0.0634113	0.120152	0.200594	0.248047	0.248047	0.292284	0.363033	0.463072	0.496094	0.55722	0.67741	0.744141	0.791758	0.894346	0.992188	1.1292	1.24023	1.43046	1.58827	1.8371	2.24616	2.8927	4.2168	8.89171
0	0	0.0636232	0.12076	0.20078	0.248047	0.248047	0.29262	0.363348	0.463355	0.496094	0.558614	0.67824	0.744141	0.795691	0.894346	0.992188	1.12942	1.24023	1.43357	1.58827	1.8402	2.24616	2.8927	4.2168	9.0154
0	0	0.0636773	0.121244	0.202597	0.248047	0.248047	0.292956	0.363908	0.463414	0.496094	0.559881	0.680422	0.744141	0.798418	0.894346	0.992281	1.1325	1.24023	1.43705	1.58827	1.87137	2.24616	2.8927	4.22409	9.2678
0	0	0.0638523	0.122583	0.203284	0.248047	0.248047	0.293563	0.364384	0.467563	0.496094	0.562063	0.680682	0.744141	0.799628	0.895272	0.995431	1.13338	1.24023	1.43708	1.58827	1.87243	2.24616	2.89929	4.22409	9.38981
0	0	0.0640288	0.123048	0.203741	0.248047	0.248047	0.294391	0.366488	0.468601	0.496094	0.566737	0.682704	0.744141	0.799664	0.896413	0.995923	1.13599	1.24023	1.44068	1.58827	1.88146	2.24616	2.90051	4.2267	9.50703
0	0	0.0641471	0.123212	0.204147	0.248047	0.248047	0.294456	0.367564	0.468877	0.496094	0.567193	0.683259	0.744141	0.801367	0.898965	0.996207	1.13739	1.24023	1.44166	1.58827	1.88907	2.26312	2.94128	4.23863	9.64835
0	0	0.0645766	0.123443	0.204962	0.248047	0.248047	0.296982	0.368178	0.46902	0.496094	0.574036	0.683311	0.744141	0.804746	0.905188	1.00228	1.14317	1.24023	1.44635	1.58827	1.88907	2.28688	2.96399	4.26756	10.0329
0	0	0.0649496	0.123554	0.205776	0.248047	0.248047	0.297249	0.369678	0.469851	0.496094	0.574342	0.685299	0.744141	0.805249	0.905678	1.00253	1.1458	1.24023	1.44635	1.58827	1.89173	2.29245	2.98688	4.26756	10.2782
0	0	0.0649841	0.124023	0.206091	0.248047	0.248047	0.297681	0.370051	0.47014	0.496094	0.574414	0.686341	0.744141	0.805303	0.907061	1.00325	1.14835	1.24023	1.44635	1.58827	1.90238	2.34007	2.98688	4.26756	10.5617
0	0	0.0659904	0.1241	0.206657	0.248047	0.248047	0.298078	0.370797	0.471611	0.496094	0.575209	0.686392	0.744141	0.805999	0.908312	1.00578	1.1508	1.24023	1.44635	1.58827	1.90554	2.34007	2.99716	4.26756	10.7121
0	0	0.0662254	0.124819	0.206718	0.248047	0.248047	0.298342	0.372689	0.477147	0.496094	0.576245	0.691244	0.744141	0.807865	0.910616	1.00698	1.15959	1.24023	1.44635	1.59438	1.90742	2.34007	2.9983	4.31081	11.0736
0	0	0.0666734	0.124887	0.207895	0.248047	0.248047	0.298549	0.372994	0.478203	0.496094	0.577057	0.696167	0.744141	0.809263	0.911243	1.00977	1.16359	1.24023	1.44635	1.5976	1.90864	2.34007	3.01762	4.3884	11.1731
0	0	0.0673848	0.125367	0.208291	0.248047	0.248047	0.299365	0.373043	0.479212	0.496094	0.579587	0.696362	0.744141	0.810032	0.913142	1.00991	1.16815	1.24023	1.44635	1.59817	1.91063	2.34007	3.0278	4.40086	11.3805
0	0	0.0677019	0.126034	0.208623	0.248047	0.248047	0.299442	0.374222	0.479784	0.498147	0.580729	0.697521	0.744141	0.810592	0.916894	1.01132	1.17881	1.24023	1.44635	1.60012	1.92469	2.34007	3.0278	4.40194	11.4129
0	0	0.0677973	0.126309	0.209111	0.248047	0.248047	0.299694	0.375792	0.480508	0.498259	0.584814	0.697974	0.744141	0.811523	0.916939	1.01728	1.18039	1.24023	1.44635	1.60196	1.92913	2.34007	3.0278	4.41635	11.7319
0	0	0.0683261	0.126443	0.210119	0.248047	0.248047	0.300051	0.375995	0.481836	0.498579	0.585277	0.698688	0.744141	0.81175	0.918461	1.02272	1.187	1.24023	1.44635	1.60341	1.93045	2.34007	3.03381	4.43201	12.1137
0	0	0.0684422	0.126596	0.210425	0.248047	0.248047	0.302537	0.376211	0.482024	0.504361	0.588033	0.699115	0.744141	0.812622	0.919068	1.02272	1.19228	1.24023	1.44635	1.60664	1.93731	2.35318	3.03424	4.47173	12.1137
0	0	0.0686664	0.12746	0.210545	0.248047	0.248047	0.302735	0.376591	0.483809	0.506062	0.589127	0.699444	0.744141	0.813528	0.922302	1.02272	1.1927	1.24023	1.44635	1.61808	1.93731	2.35318	3.06817	4.47173	12.1771
0	0	0.0688878	0.12786	0.211093	0.248047	0.248047	0.304117	0.376753	0.484643	0.507332	0.589825	0.699906	0.744141	0.814129	0.922729	1.02272	1.19652	1.2418	1.44635	1.62383	1.93731	2.35318	3.06817	4.47173	12.2777
0	0	0.0699115	0.127895	0.211108	0.248047	0.248047	0.30466	0.377625	0.484643	0.50772	0.590366	0.701583	0.744141	0.81527	0.922794	1.02272	1.19653	1.24341	1.44635	1.64196	1.93731	2.35318	3.09692	4.47173	12.3576
0	0	0.0700008	0.12853	0.211393	0.248047	0.248047	0.304682	0.379555	0.48508	0.507854	0.590786	0.701583	0.744141	0.817385	0.924552	1.02272	1.20046	1.25319	1.44635	1.65645	1.93731	2.36583	3.14579	4.53226	12.5748
0	0	0.0704122	0.128719	0.21194	0.248047	0.248047	0.304793	0.379872	0.485138	0.508908	0.592317	0.701583	0.744141	0.821039	0.925395	1.02272	1.201	1.25722	1.44635	1.6577	1.93731	2.3683	3.15712	4.5328	12.6017
0	0	0.0707669	0.129241	0.212089	0.248047	0.248047	0.305489	0.380122	0.486548	0.5095	0.592607	0.701583	0.744141	0.821931	0.925614	1.02272	1.20184	1.2648	1.44635	1.66395	1.93731	2.39552	3.17286	4.53637	12.6504
0	0	0.0708117	0.129534	0.212561	0.248047	0.248047	0.307261	0.38093	0.486943	0.511522	0.595883	0.701583	0.744141	0.822124	0.929409	1.02272	1.20708	1.2648	1.45187	1.66395	1.93731	2.39609	3.17655	4.5387	12.7858
0	0	0.0710655	0.129588	0.212791	0.248047	0.248047	0.307475	0.382685	0.487018	0.512218	0.597322	0.701583	0.744141	0.823933	0.9333	1.02272	1.2083	1.2648	1.45312	1.66395	1.93731	2.39743	3.17655	4.54488	13.0902
0	0	0.0712423	0.129734	0.213145	0.248047	0.248047	0.307629	0.383814	0.488975	0.512838	0.598537	0.701583	0.744141	0.825055	0.933688	1.02272	1.20993	1.2648	1.45313	1.66395	1.93731	2.43017	3.17655	4.54874	13.2235
0	0.00465542	0.0714719	0.129901	0.213232	0.248047	0.248047	0.308433	0.384037	0.489452	0.513593	0.603071	0.701583	0.744141	0.826062	0.93392	1.02272	1.21319	1.2648	1.45364	1.66395	1.93731	2.45257	3.17655	4.55354	13.2583
0	0.00482577	0.072035	0.129992	0.215443	0.248047	0.248047	0.30898	0.385013	0.490132	0.514033	0.604249	0.701583	0.744141	0.828203	0.939183	1.02272	1.217	1.2648	1.45366	1.66395	1.93731	2.45554	3.17655	4.56029	13.3784
0	0.00596474	0.0728225	0.130325	0.218061	0.248047	0.248047	0.309727	0.386542	0.490687	0.515497	0.607159	0.701583	0.744141	0.828414	0.940503	1.02272	1.21784	1.2648	1.46158	1.66395	1.93731	2.46025	3.17655	4.56029	13.5339
0	0.00943312	0.0729385	0.130527	0.218142	0.248047	0.248047	0.310227	0.386993	0.491597	0.515926	0.607759	0.701583	0.744141	0.829262	0.940683	1.02272	1.22104	1.2648	1.46954	1.66395	1.93731	2.46775	3.21978	4.56061	13.6493
0	0.0121137	0.0735533	0.131372	0.218809	0.248047	0.248047	0.310771	0.388899	0.492768	0.518123	0.607859	0.701583	0.744141	0.829663	0.940944	1.02377	1.22375	1.2648	1.47312	1.67004	1.95571	2.48047	3.22461	4.56152	13.6606
0	0.0141071	0.073581	0.131927	0.218974	0.248047	0.248047	0.312623	0.390725	0.49318	0.519964	0.607992	0.701583	0.744141	0.835116	0.944992	1.03563	1.2301	1.2648	1.47673	1.67252	1.96558	2.48047	3.23055	4.57376	13.8109
0	0.0150253	0.075538	0.131985	0.219285	0.248047	0.248047	0.316599	0.393062	0.495008	0.520052	0.609175	0.701583	0.744141	0.837607	0.949177	1.04014	1.23106	1.2648	1.47952	1.6728	1.96645	2.48047	3.23414	4.58174	13.824
0	0.0152302	0.0759222	0.134668	0.220693	0.248047	0.248047	0.31681	0.395089	0.496035	0.520677	0.609816	0.701583	0.744141	0.837732	0.949264	1.04161	1.23539	1.26796	1.48269	1.67418	1.97106	2.48047	3.31788	4.59997	14.1408
0	0.0153158	0.0764428	0.135077	0.221679	0.248047	0.248047	0.317028	0.395921	0.496094	0.521691	0.61028	0.704236	0.744141	0.838857	0.949904	1.04272	1.23602	1.2686	1.48399	1.67507	1.97899	2.48047	3.3279	4.60631	14.206
0	0.0157632	0.0765724	0.13619	0.222266	0.248047	0.248047	0.31728	0.396327	0.496094	0.523327	0.610409	0.706762	0.744141	0.839125	0.951499	1.04676	1.23998	1.26984	1.48726	1.67996	1.9834	2.48047	3.33713	4.61369	14.6142
0	0.0158099	0.0766623	0.136195	0.223139	0.248047	0.248047	0.317557	0.396648	0.496094	0.523464	0.612238	0.70692	0.744141	0.84434	0.951672	1.04827	1.24023	1.27508	1.48828	1.68889	1.98438	2.48047	3.34056	4.61394	14.7437
0	0.0158871	0.0767656	0.137808	0.223315	0.248047	0.248047	0.317763	0.39794	0.496094	0.526428	0.613556	0.707388	0.744141	0.846143	0.953128	1.05183	1.24023	1.2813	1.48828	1.6992	1.98438	2.48047	3.3738	4.61394	15.1309
0	0.0167096	0.0773019	0.138882	0.22471	0.248047	0.248245	0.322639	0.398331	0.496094	0.527052	0.615603	0.707448	0.744141	0.848934	0.963174	1.05207	1.24023	1.28165	1.48828	1.7025	1.98438	2.48047	3.44598	4.62396	15.925
0	0.0168256	0.0773339	0.139107	0.225772	0.248047	0.250072	0.323193	0.398709	0.496094	0.527331	0.615888	0.70779	0.744141	0.85129	0.963909	1.05237	1.24023	1.28332	1.48828	1.70611	1.98438	2.48047	3.45263	4.6339	16.0312
0	0.017596	0.0779303	0.139271	0.22608	0.248047	0.250782	0.323652	0.398797	0.496094	0.52734	0.616624	0.708454	0.744141	0.854322	0.965766	1.05237	1.24023	1.28842	1.48828	1.70623	1.98438	2.48047	3.45489	4.66794	16.0389
0	0.0187423	0.0779303	0.140267	0.227072	0.248047	0.253236	0.323984	0.401223	0.496094	0.527423	0.622429	0.711327	0.744141	0.856118	0.966316	1.05237	1.24023	1.28885	1.48828	1.71207	1.98438	2.48047	3.47187	4.68563	16.8339
0	0.0187866	0.0788661	0.141828	0.227902	0.248047	0.253319	0.325523	0.401318	0.496094	0.531798	0.623058	0.712194	0.744141	0.856805	0.966497	1.05237	1.24023	1.29123	1.48828	1.71897	1.98438	2.48047	3.47266	4.69676	16.9563
0	0.0194922	0.0792711	0.141891	0.228084	0.248047	0.253531	0.326276	0.403386	0.496094	0.532038	0.623626	0.717574	0.744861	0.857036	0.971391	1.05237	1.24023	1.29236	1.48828	1.73633	1.98438	2.48047	3.48753	4.70636	17.2459
0	0.0202466	0.0798773	0.142093	0.228117	0.248047	0.254277	0.327414	0.404097	0.496094	0.536357	0.623971	0.717576	0.748258	0.859515	0.972617	1.05237	1.24023	1.29301	1.48828	1.73633	1.98438	2.48047	3.50362	4.71941	17.4763
0	0.0207475	0.0802961	0.142371	0.228357	0.248047	0.254912	0.327517	0.405017	0.496094	0.536959	0.624888	0.719464	0.748664	0.859612	0.983631	1.0566	1.24023	1.29347	1.48828	1.73633	1.98684	2.48047	3.50791	4.73893	17.627
0	0.0216988	0.0809865	0.142593	0.230194	0.248047	0.255078	0.327801	0.406081	0.496094	0.539663	0.626418	0.723954	0.750532	0.860219	0.985064	1.05851	1.24023	1.29531	1.48828	1.73633	1.98747	2.48047	3.50791	4.73893
0	0.0218091	0.0811023	0.142969	0.23034	0.248047	0.25656	0.327982	0.407757	0.496094	0.540389	0.628151	0.724172	0.750661	0.860633	0.986319	1.06285	1.24023	1.29732	1.48828	1.73633	1.99188	2.48047	3.50791	4.73893
0	0.0223091	0.0815316	0.143902	0.230521	0.248047	0.256874	0.328019	0.407824	0.496094	0.543243	0.629642	0.724508	0.750691	0.861153	0.986673	1.06593	1.24023	1.29739	1.48828	1.73633	1.99232	2.48047	3.50791	4.74828
0	0.0225061	0.0821392	0.144636	0.231362	0.248047	0.25694	0.328459	0.409092	0.496094	0.545473	0.631102	0.724977	0.752194	0.865624	0.987328	1.06606	1.24023	1.29945	1.48828	1.73633	1.99982	2.48047	3.52541	4.85522
0	0.0237702	0.0827069	0.145274	0.232057	0.248047	0.257018	0.328775	0.409153	0.496094	0.546025	0.632294	0.728354	0.754952	0.866957	0.987965	1.07299	1.24023	1.30149	1.48828	1.73633	1.99982	2.48047	3.52541	4.89225
0	0.0238467	0.0827399	0.146023	0.23238	0.248047	0.257977	0.328883	0.412007	0.496094	0.548338	0.633316	0.729475	0.756178	0.867947	0.991418	1.0762	1.24023	1.30454	1.48828	1.73633	1.99982	2.48047	3.52629	4.91108
0	0.0239789	0.0827809	0.146969	0.232737	0.248047	0.258173	0.329379	0.412283	0.496094	0.548844	0.634439	0.731419	0.75713	0.869745	0.992188	1.08085	1.24023	1.30598	1.48828	1.73633	1.99982	2.48047	3.53071	4.92359
0	0.0244109	0.0834169	0.147049	0.233224	0.248047	0.258253	0.329664	0.413069	0.496094	0.549386	0.637595	0.733115	0.758328	0.873387	0.992188	1.08162	1.24023	1.3092	1.48828	1.73633	1.99982	2.48047	3.54818	4.92359
0	0.0245836	0.0836798	0.147415	0.233226	0.248047	0.258285	0.330275	0.41696	0.496094	0.550234	0.63848	0.733278	0.762413	0.876321	0.992188	1.08396	1.24023	1.30938	1.48828	1.73633	1.99982	2.48348	3.55008	4.9423
0	0.024651	0.0841406	0.1476	0.233284	0.248047	0.25852	0.330793	0.418781	0.496094	0.551419	0.638757	0.73487	0.762927	0.877943	0.992188	1.08537	1.24023	1.30951	1.48828	1.73633	1.99982	2.48909	3.55528	4.95047
0	0.0246819	0.0844249	0.14834	0.233755	0.248047	0.258828	0.331808	0.419061	0.496094	0.551542	0.639301	0.735567	0.764767	0.878554	0.992188	1.0904	1.24023	1.30951	1.48828	1.73633	1.99982	2.49159	3.57738	4.95684
0	0.0261098	0.0844552	0.148557	0.234333	0.248047	0.259394	0.333223	0.419839	0.496094	0.552629	0.639776	0.73577	0.764877	0.879306	0.992188	1.09139	1.24023	1.31906	1.48828	1.74244	1.99982	2.49284	3.57738	4.96094
0	0.0262277	0.0846449	0.148697	0.234339	0.248047	0.260057	0.335277	0.420107	0.496094	0.554582	0.640658	0.736702	0.765776	0.882036	0.992188	1.09401	1.24023	1.31911	1.48828	1.74792	1.99982	2.49284	3.57826	4.98568
0	0.0264438	0.0849282	0.148921	0.234522	0.248047	0.260129	0.336646	0.420173	0.496094	0.554605	0.641269	0.737737	0.76629	0.882123	0.992188	1.09444	1.24023	1.32599	1.48911	1.74868	1.99982	2.50471	3.58422	4.99185
0	0.0266939	0.0854783	0.149247	0.235423	0.248047	0.260679	0.336789	0.420652	0.496094	0.55465	0.642569	0.73838	0.766326	0.882312	0.992188	1.0978	1.24023	1.332	1.48923	1.74923	1.99982	2.50709	3.59146	5.0895
0	0.0269656	0.0862573	0.1507	0.236309	0.248047	0.261051	0.338073	0.420677	0.496094	0.55465	0.645486	0.739612	0.766843	0.887376	0.992188	1.10039	1.24023	1.33441	1.49103	1.75396	2.01266	2.52959	3.59924	5.11362
0	0.0274571	0.0867189	0.150963	0.236682	0.248047	0.261279	0.338471	0.421443	0.496094	0.55465	0.645504	0.740271	0.770406	0.890011	0.992188	1.10192	1.24023	1.33577	1.49124	1.75396	2.03104	2.52959	3.60225	5.11362
0	0.0275728	0.0874894	0.151351	0.237008	0.248047	0.2615	0.338854	0.422134	0.496094	0.55465	0.64769	0.74302	0.773094	0.891992	0.992188	1.10872	1.24023	1.33577	1.49317	1.75396	2.03698	2.52959	3.60549	5.16152
0	0.0277108	0.0875161	0.151613	0.237628	0.248047	0.262002	0.344331	0.422418	0.496094	0.55465	0.648039	0.744141	0.773351	0.894346	0.992188	1.10879	1.24023	1.33577	1.49772	1.75396	2.04673	2.52959	3.61162	5.16702
0	0.0278929	0.0875688	0.151679	0.238163	0.248047	0.262025	0.344511	0.423233	0.496094	0.55465	0.649583	0.744141	0.776362	0.894346	0.992188	1.1093	1.24023	1.33577	1.50264	1.75396	2.05906	2.5538	3.61162	5.19804
0	0.0280296	0.08778	0.15173	0.238413	0.248047	0.263378	0.345031	0.423566	0.496094	0.55465	0.651979	0.744141	0.777408	0.894346	0.992188	1.1093	1.24023	1.33577	1.50281	1.75396	2.06864	2.5538	3.61162	5.23255
0	0.0283037	0.0878864	0.15239	0.239324	0.248047	0.26363	0.345624	0.424414	0.496094	0.55465	0.652113	0.744141	0.778922	0.894346	0.992188	1.1093	1.24023	1.33577	1.50286	1.75396	2.08899	2.5538	3.6288	5.23255
0	0.0291072	0.089004	0.152455	0.240072	0.248047	0.265308	0.34607	0.425672	0.496094	0.55465	0.652439	0.744141	0.779364	0.894346	0.992188	1.1093	1.24023	1.33577	1.50738	1.75396	2.09307	2.5538	3.6341	5.26187
0	0.0297656	0.0895592	0.152535	0.240409	0.248047	0.265311	0.347116	0.42578	0.496094	0.55465	0.653155	0.744141	0.78058	0.894346	0.992188	1.1093	1.24023	1.33577	1.50881	1.75396	2.10146	2.5538	3.66475	5.30264
0	0.0299084	0.0902513	0.153606	0.240562	0.248047	0.265566	0.348415	0.425843	0.496094	0.55465	0.656565	0.744141	0.784393	0.894346	0.992188	1.1093	1.24023	1.33577	1.50881	1.75396	2.10475	2.5538	3.67645	5.32579
0	0.0299398	0.0904084	0.153883	0.240895	0.248047	0.265867	0.348435	0.426688	0.496094	0.55465	0.657765	0.744141	0.784393	0.894346	0.992188	1.1093	1.24023	1.33577	1.50881	1.75396	2.10475	2.5538	3.68748	5.32579
0	0.0300641	0.0906014	0.153979	0.240905	0.248047	0.267006	0.348545	0.426999	0.496094	0.55465	0.659881	0.744141	0.784393	0.894346	0.992188	1.1093	1.24023	1.33577	1.50961	1.75396	2.10475	2.5538	3.68748	5.35398
0	0.0302742	0.0906886	0.15441	0.242424	0.248047	0.267252	0.348603	0.429085	0.496094	0.55465	0.660179	0.744141	0.784393	0.894346	0.992188	1.1093	1.24023	1.33577	1.51258	1.75396	2.11539	2.5538	3.68748	5.3546
0	0.030838	0.0909607	0.155734	0.242889	0.248047	0.267513	0.350388	0.429104	0.496094	0.55465	0.66147	0.744141	0.784393	0.894346	0.992188	1.1093	1.24023	1.33577	1.51671	1.75396	2.11931	2.5538	3.68748	5.36607
0	0.030982	0.091079	0.156504	0.24338	0.248047	0.268501	0.350791	0.429202	0.496094	0.55465	0.661637	0.744141	0.784393	0.894346	0.992188	1.1093	1.24023	1.33577	1.53521	1.75396	2.11973	2.55785	3.68748	5.47621
0	0.031021	0.0918384	0.1571	0.243918	0.248047	0.268706	0.350791	0.431875	0.496094	0.55465	0.66166	0.744141	0.784393	0.894346	0.992188	1.1093	1.24023	1.33577	1.53618	1.75396	2.13378	2.56762	3.68748	5.48974
0	0.0312603	0.0928412	0.157433	0.243965	0.248047	0.269443	0.350791	0.432185	0.496094	0.55465	0.661666	0.744141	0.784393	0.894346	0.992188	1.11909	1.24023	1.33577	1.53774	1.75396	2.13378	2.58969	3.68748	5.50753
0	0.0317059	0.0929958	0.157791	0.244793	0.248047	0.269545	0.350791	0.43365	0.496094	0.55465	0.662013	0.744141	0.784393	0.894346	0.992188	1.12194	1.24023	1.33577	1.54231	1.75396	2.13378	2.60213	3.68748	5.52395
0	0.0319723	0.0930326	0.15871	0.245176	0.248047	0.269725	0.350791	0.434385	0.496094	0.55465	0.662364	0.744141	0.784393	0.894346	0.992188	1.1229	1.24023	1.33577	1.54241	1.75396	2.13378	2.63677	3.70281	5.53317
0	0.0329856	0.0936262	0.159017	0.245415	0.248047	0.270577	0.350791	0.434742	0.496094	0.55465	0.662669	0.744141	0.784393	0.894346	0.992188	1.12349	1.24023	1.34301	1.54591	1.75396	2.13378	2.63677	3.7041	5.55234
0	0.0330121	0.0936298	0.159085	0.245647	0.248047	0.270747	0.350791	0.437339	0.496094	0.55465	0.662711	0.744141	0.784393	0.894346	0.992188	1.1267	1.24023	1.3501	1.54675	1.75396	2.13378	2.65481	3.71812	5.59619
0	0.033118	0.0937264	0.160636	0.246819	0.248047	0.271412	0.350791	0.437817	0.496094	0.55465	0.663323	0.744141	0.784393	0.894346	0.992188	1.12957	1.24023	1.35024	1.55621	1.75396	2.13378	2.67155	3.7207	5.59898
0	0.0335499	0.0938563	0.160883	0.246831	0.248047	0.272006	0.350791	0.43856	0.496094	0.55465	0.665129	0.744141	0.784393	0.894346	0.992188	1.12959	1.24023	1.35163	1.55853	1.75396	2.13378	2.67155	3.7207	5.65634
0	0.0342861	0.0940986	0.162247	0.246851	0.248047	0.273522	0.350791	0.439055	0.496094	0.55465	0.666284	0.744141	0.784393	0.894346	0.99368	1.13323	1.24023	1.35542	1.56228	1.75396	2.15651	2.67155	3.7207	5.71047
0	0.0344419	0.0941586	0.162433	0.247546	0.248047	0.275338	0.350791	0.439913	0.496094	0.55465	0.669077	0.744141	0.784393	0.894346	1.00424	1.13421	1.24023	1.35762	1.56879	1.75396	2.17285	2.67155	3.73532	5.76108
0	0.0351678	0.0942762	0.162483	0.248047	0.248047	0.275845	0.350791	0.440046	0.496094	0.55465	0.669933	0.744141	0.784393	0.894346	1.00513	1.13611	1.24023	1.358	1.56879	1.75396	2.18611	2.67155	3.76153	5.7854
0	0.0359745	0.0942928	0.163449	0.248047	0.248047	0.27619	0.350791	0.442439	0.496094	0.55465	0.673573	0.744141	0.784393	0.89626	1.00767	1.13633	1.24023	1.3667	1.56879	1.75396	2.18732	2.67155	3.77681	5.7854
0	0.03609	0.0943545	0.163713	0.248047	0.248047	0.27712	0.350791	0.443372	0.496094	0.55465	0.675058	0.744141	0.784393	0.899712	1.0093	1.14422	1.24023	1.37928	1.56978	1.75396	2.1931	2.68304	3.77814	5.79587
0	0.0364405	0.0953247	0.163761	0.248047	0.248047	0.277125	0.350791	0.443716	0.496094	0.55465	0.675568	0.744141	0.784393	0.905878	1.01387	1.14494	1.24023	1.38209	1.57244	1.75396	2.19381	2.68304	3.77814	5.81257
0	0.0364639	0.0959856	0.16382	0.248047	0.248047	0.277876	0.350791	0.443966	0.496094	0.55465	0.67586	0.744141	0.784393	0.907308	1.01485	1.15029	1.24023	1.38641	1.57457	1.75396	2.19694	2.68304	3.79167	5.83833
0	0.036985	0.0967399	0.164731	0.248047	0.248047	0.278559	0.350791	0.445069	0.496094	0.55465	0.67707	0.744141	0.784393	0.909894	1.01986	1.15295	1.24023	1.38848	1.57805	1.75396	2.2186	2.69317	3.79395	5.89487
0	0.0370882	0.0967546	0.164814	0.248047	0.248047	0.278947	0.350791	0.445163	0.496094	0.55465	0.678083	0.744141	0.784393	0.911464	1.02184	1.15873	1.24023	1.39188	1.5821	1.75396	2.2186	2.71566	3.82329	5.90924
0	0.0373121	0.0970211	0.164895	0.248047	0.248047	0.279637	0.350791	0.449363	0.496094	0.55465	0.67883	0.744141	0.784989	0.91215	1.02272	1.15882	1.24023	1.39283	1.58379	1.75396	2.2186	2.73977	3.83189	5.91639
0	0.0378156	0.0970908	0.16537	0.248047	0.248047	0.280458	0.350791	0.450091	0.496094	0.55465	0.680257	0.744141	0.78836	0.91408	1.02272	1.15997	1.24023	1.39835	1.58827	1.75396	2.2186	2.77325	3.85072	5.98596
0	0.0382193	0.0978897	0.167198	0.248047	0.248047	0.280577	0.350791	0.45588	0.496094	0.55465	0.680461	0.744141	0.790898	0.915608	1.02272	1.17054	1.24023	1.39886	1.58827	1.75396	2.23242	2.77325	3.85072	5.99945
0	0.0389382	0.0979456	0.167422	0.248047	0.248047	0.280945	0.350791	0.456499	0.496094	0.55465	0.685557	0.744141	0.791305	0.917619	1.02272	1.17363	1.24023	1.39969	1.58827	1.75396	2.23242	2.77325	3.8587	6.0948
0	0.0389964	0.0980463	0.16743	0.248047	0.248047	0.28104	0.350791	0.458285	0.496094	0.555991	0.68808	0.744141	0.792083	0.91937	1.02272	1.17433	1.24023	1.40317	1.58827	1.75396	2.23242	2.77325	3.8587	6.10115
0	0.0396016	0.0981051	0.167705	0.248047	0.248047	0.282051	0.350791	0.458619	0.496094	0.556445	0.689938	0.744141	0.794272	0.919761	1.02272	1.1758	1.24023	1.40317	1.58827	1.77301	2.23242	2.77325	3.8587	6.12503
0	0.0397241	0.0993663	0.167808	0.248047	0.248047	0.282649	0.350791	0.458961	0.496094	0.559188	0.690145	0.744141	0.794503	0.922473	1.02272	1.17634	1.24023	1.40317	1.58827	1.77463	2.23242	2.77325	3.87123	6.15176
0	0.0405179	0.0993663	0.167924	0.248047	0.248047	0.282983	0.350791	0.460541	0.496094	0.560363	0.690739	0.744141	0.795689	0.925007	1.02272	1.17755	1.24023	1.40317	1.58827	1.78805	2.23242	2.77325	3.87456	6.16181
0	0.0406723	0.100087	0.168095	0.248047	0.248047	0.283089	0.350791	0.460588	0.496094	0.560865	0.692674	0.744141	0.797285	0.926752	1.02272	1.17783	1.24023	1.41571	1.58827	1.78869	2.23242	2.77325	3.87462	6.20117
0	0.0407586	0.100202	0.168466	0.248047	0.248047	0.283194	0.350791	0.460829	0.496094	0.560876	0.694867	0.744141	0.799412	0.928099	1.02272	1.17789	1.24023	1.41934	1.58827	1.78869	2.23242	2.77325	3.87462	6.22098
0	0.0409347	0.100397	0.168862	0.248047	0.248047	0.283212	0.350791	0.461942	0.496094	0.562226	0.695688	0.744141	0.800983	0.9281	1.02272	1.18094	1.24023	1.4197	1.58827	1.78869	2.23242	2.77325	3.87462	6.24858
0	0.0413387	0.101116	0.169514	0.248047	0.248047	0.285093	0.350791	0.462282	0.496094	0.564133	0.697068	0.744141	0.803383	0.928925	1.02272	1.18105	1.24023	1.42255	1.58827	1.78869	2.23242	2.77325	3.87462	6.27808
0	0.0418854	0.101146	0.170014	0.248047	0.248047	0.285728	0.350791	0.463212	0.496094	0.564268	0.697586	0.744141	0.804668	0.92994	1.02272	1.18155	1.24023	1.42825	1.58827	1.78869	2.23242	2.77325	3.87462	6.28976
0	0.0421231	0.101557	0.170333	0.248047	0.248047	0.286556	0.350791	0.464839	0.496094	0.567586	0.699373	0.744141	0.80498	0.930439	1.02272	1.18289	1.24023	1.43046	1.58827	1.78869	2.23242	2.77325	3.87462	6.35794
0	0.0421981	0.101621	0.170556	0.248047	0.248047	0.286909	0.350791	0.46539	0.496094	0.567766	0.699382	0.744141	0.805321	0.934504	1.02272	1.18374	1.24023	1.43538	1.58827	1.78962	2.23242	2.82608	3.87462	6.35794
0	0.0428202	0.101999	0.171675	0.248047	0.248047	0.288189	0.350791	0.466689	0.496094	0.567922	0.701313	0.744141	0.805478	0.937455	1.02272	1.18718	1.24023	1.44132	1.58827	1.79137	2.23242	2.82817	3.87462	6.46827
0	0.0430426	0.102447	0.172239	0.248047	0.248047	0.288428	0.350791	0.467846	0.496094	0.573501	0.701533	0.744141	0.809579	0.941314	1.02508	1.18871	1.24023	1.44349	1.58827	1.79611	2.23242	2.82817	3.87462	6.48531
0	0.0431618	0.103057	0.173219	0.248047	0.248047	0.288894	0.350791	0.468691	0.496094	0.575076	0.701583	0.744141	0.810838	0.942795	1.02747	1.19111	1.24023	1.44526	1.58827	1.80343	2.23242	2.82817	3.88585	6.52509
0	0.0435647	0.103345	0.17331	0.248047	0.248047	0.289633	0.350791	0.470398	0.496094	0.576105	0.701583	0.744141	0.81223	0.94425	1.02915	1.19748	1.24023	1.44635	1.58827	1.80581	2.23242	2.82817	3.88642	6.55332
0	0.0437804	0.104724	0.173552	0.248047	0.248047	0.289832	0.350791	0.470979	0.496094	0.577022	0.701583	0.744141	0.813031	0.946079	1.03104	1.2012	1.24023	1.44635	1.58827	1.82367	2.2392	2.84234	3.89439	6.60476
0	0.044128	0.104923	0.174554	0.248047	0.248047	0.291567	0.350791	0.471921	0.496094	0.577992	0.701583	0.744141	0.813078	0.951156	1.03199	1.20126	1.24023	1.44635	1.58827	1.83059	2.23964	2.86236	3.91038	6.67887
0	0.0441755	0.105371	0.174607	0.248047	0.248047	0.291867	0.351462	0.474506	0.496094	0.583079	0.701583	0.744141	0.818938	0.954831	1.03453	1.20527	1.24023	1.44635	1.58827	1.83376	2.24616	2.88679	3.92197	6.67887
0	0.0444066	0.105589	0.175668	0.248047	0.248047	0.291928	0.355448	0.474665	0.496094	0.585114	0.701583	0.744141	0.821374	0.957347	1.03724	1.20878	1.24023	1.44635	1.58827	1.83954	2.24616	2.8927	3.92197	6.70186
0	0.044472	0.105939	0.175903	0.248047	0.248047	0.292677	0.355967	0.475013	0.496094	0.585325	0.701583	0.744141	0.822466	0.958068	1.03857	1.21294	1.24023	1.44635	1.58827	1.87201	2.24616	2.8927	3.92197	6.81113
0	0.0454948	0.106176	0.176106	0.248047	0.248047	0.292928	0.359282	0.476304	0.496094	0.585535	0.701583	0.744141	0.82305	0.958546	1.03902	1.21302	1.24023	1.44635	1.58827	1.87214	2.24616	2.89668	3.96875	6.81113
0	0.0463688	0.106862	0.176166	0.248047	0.248047	0.294229	0.359397	0.477644	0.496094	0.588593	0.701583	0.744141	0.828757	0.958778	1.04392	1.21605	1.24185	1.44635	1.58827	1.88203	2.28667	2.91023	3.99964	6.81113
0	0.0466516	0.106987	0.176437	0.248047	0.248047	0.294597	0.359447	0.477667	0.496094	0.588789	0.701583	0.744141	0.830727	0.962258	1.04445	1.21758	1.24309	1.44635	1.58827	1.88385	2.28688	2.94033	3.99964	6.81113
0	0.0466882	0.107428	0.176773	0.248047	0.248047	0.297426	0.359617	0.477697	0.496094	0.589939	0.703092	0.744141	0.830872	0.962766	1.04697	1.23132	1.24593	1.44635	1.58827	1.88695	2.28688	2.9407	4.00391	6.89195
0	0.0469046	0.107782	0.177099	0.248047	0.248047	0.297861	0.359744	0.477739	0.496094	0.590561	0.703183	0.744141	0.835948	0.968135	1.05136	1.23154	1.24969	1.44635	1.58827	1.88872	2.28688	2.94488	4.00732	6.91869
0	0.047099	0.108011	0.177188	0.248047	0.248047	0.298509	0.361233	0.478916	0.496094	0.600515	0.704223	0.744141	0.8372	0.969683	1.05141	1.23697	1.25392	1.44635	1.58827	1.88907	2.30412	2.96298	4.03647	6.94531
0	0.0475515	0.108081	0.177241	0.248047	0.248047	0.298968	0.361842	0.479521	0.496094	0.601342	0.7049	0.744141	0.838597	0.971079	1.05237	1.23941	1.25473	1.44635	1.58827	1.88907	2.30694	2.97656	4.03791	7.00266
0	0.0483464	0.108227	0.177296	0.248047	0.248047	0.299367	0.362266	0.479774	0.496094	0.60177	0.711223	0.744141	0.838932	0.973488	1.05237	1.24023	1.25698	1.44635	1.58949	1.88907	2.30766	2.98688	4.03791	7.00266
0	0.0483545	0.108292	0.178321	0.248047	0.248047	0.299421	0.362904	0.480229	0.496094	0.604437	0.711517	0.744141	0.842251	0.97805	1.05237	1.24023	1.25926	1.44635	1.59301	1.88907	2.31691	2.98688	4.05059	7.01583
0	0.0484327	0.109311	0.178402	0.248047	0.248047	0.300756	0.36295	0.480404	0.497045	0.605107	0.711827	0.744141	0.845236	0.978765	1.05237	1.24023	1.26073	1.44635	1.59426	1.89091	2.33161	2.99962	4.05615	7.23175
0	0.0487603	0.109353	0.178832	0.248047	0.248047	0.30268	0.363718	0.480998	0.497747	0.606081	0.712627	0.744141	0.847934	0.984075	1.05237	1.24023	1.2612	1.44635	1.59976	1.90978	2.34007	3.0278	4.05891	7.29528
0	0.048922	0.109522	0.17893	0.248047	0.248047	0.30342	0.364523	0.481946	0.497851	0.606335	0.712647	0.744141	0.849038	0.984415	1.05237	1.24023	1.2612	1.44635	1.60719	1.9215	2.34007	3.0278	4.06827	7.44141
0	0.0494417	0.109526	0.179853	0.248047	0.248047	0.304189	0.364785	0.482672	0.498077	0.610315	0.71288	0.746456	0.851979	0.986597	1.05237	1.24023	1.26173	1.44689	1.61379	1.92786	2.34007	3.0278	4.06827	7.44554
0	0.0498633	0.109659	0.179923	0.248047	0.248047	0.304249	0.368126	0.483108	0.498328	0.611273	0.716648	0.748976	0.853527	0.986753	1.05237	1.24023	1.26455	1.44968	1.62548	1.9304	2.34007	3.04711	4.06827	7.54405
0	0.0500354	0.109925	0.180649	0.248047	0.248047	0.304449	0.368404	0.483887	0.498592	0.611605	0.717045	0.749199	0.85364	0.986875	1.05704	1.24023	1.2648	1.45187	1.63733	1.93354	2.34007	3.04753	4.06827	7.56035
0	0.0502073	0.110955	0.180842	0.248047	0.248047	0.304487	0.36842	0.484373	0.49911	0.612733	0.717104	0.75137	0.857863	0.988883	1.05767	1.24023	1.2648	1.45313	1.6393	1.93731	2.34007	3.06817	4.06827	7.57254
0	0.050655	0.111716	0.18116	0.248047	0.248047	0.304501	0.371962	0.48444	0.499796	0.614425	0.717733	0.752163	0.859514	0.988969	1.06077	1.24023	1.2648	1.45314	1.64138	1.93731	2.34007	3.0834	4.06827	7.57254
0	0.0506965	0.11183	0.181478	0.248047	0.248047	0.305559	0.372865	0.485044	0.500335	0.614792	0.721905	0.752909	0.862321	0.989052	1.06622	1.24023	1.2648	1.45933	1.64367	1.93731	2.34007	3.10802	4.06827	7.64129
0	0.0507851	0.112116	0.182819	0.248047	0.248047	0.306175	0.376224	0.485306	0.505164	0.615433	0.722108	0.756163	0.864666	0.990109	1.06899	1.24023	1.2648	1.4597	1.64368	1.93731	2.34007	3.10901	4.06827	7.68945
0	0.0518234	0.112272	0.183719	0.248047	0.248047	0.306946	0.377512	0.487622	0.505787	0.615624	0.72264	0.756216	0.866909	0.992188	1.07066	1.24023	1.2648	1.46151	1.64625	1.93731	2.34007	3.15712	4.10591	7.70544
0	0.0523094	0.112367	0.184159	0.248047	0.248047	0.30703	0.377608	0.487655	0.507943	0.615726	0.72337	0.756521	0.868928	0.992188	1.07382	1.24023	1.2648	1.46398	1.64999	1.93731	2.35318	3.16385	4.12832	7.70544
0	0.0525357	0.112825	0.184259	0.248047	0.248047	0.308382	0.378402	0.488061	0.508133	0.616177	0.724828	0.757944	0.872955	0.992188	1.07472	1.24023	1.2648	1.4676	1.66395	1.93731	2.35318	3.17655	4.17307	7.70544
0	0.0530843	0.113039	0.184341	0.248047	0.248047	0.308446	0.378756	0.48897	0.508522	0.61627	0.725369	0.757973	0.873965	0.992188	1.08043	1.24023	1.2648	1.46794	1.66395	1.93731	2.35318	3.17655	4.18543	7.70544
0	0.0535129	0.113414	0.184436	0.248047	0.248047	0.309117	0.379412	0.491894	0.509285	0.61631	0.725497	0.762231	0.875843	0.992188	1.0844	1.24023	1.2648	1.47312	1.66395	1.93731	2.36129	3.17655	4.1978	7.88305
0	0.0537285	0.113953	0.184601	0.248047	0.248047	0.310561	0.379801	0.492246	0.510351	0.616524	0.725917	0.766578	0.876632	0.992188	1.0865	1.24023	1.2648	1.47385	1.66395	1.94097	2.36501	3.19098	4.20195	8.00696
0	0.0545214	0.114379	0.185831	0.248047	0.248047	0.310848	0.380269	0.492411	0.510727	0.618315	0.727718	0.768949	0.881542	0.992188	1.08822	1.24023	1.2648	1.48713	1.66395	1.96445	2.40331	3.19247	4.26756	8.03381
0	0.0545767	0.11499	0.187608	0.248047	0.248047	0.311065	0.381125	0.493964	0.512416	0.619613	0.728073	0.769908	0.886013	0.992188	1.09144	1.24023	1.2648	1.48828	1.66395	1.98438	2.41164	3.2055	4.26756	8.07582
0	0.0548358	0.115634	0.187628	0.248047	0.248047	0.313852	0.382683	0.49532	0.512832	0.62034	0.731252	0.773604	0.890178	0.992188	1.09215	1.24023	1.2648	1.48828	1.66395	1.98438	2.4181	3.22461	4.28346	8.36768
0	0.0549659	0.115762	0.187752	0.248047	0.248047	0.314002	0.383448	0.496094	0.51355	0.620504	0.732593	0.77436	0.89038	0.992188	1.09486	1.24023	1.2648	1.48828	1.69346	1.98438	2.44298	3.22461	4.3218	8.46636
0	0.0551468	0.115836	0.188097	0.248047	0.248047	0.314299	0.384242	0.496094	0.513849	0.620748	0.733184	0.776441	0.892187	0.992188	1.0969	1.24023	1.2648	1.48828	1.70085	1.98438	2.44298	3.26255	4.33487	8.49176
0	0.0552946	0.116039	0.189044	0.248047	0.248047	0.314558	0.384802	0.496094	0.514595	0.621228	0.733344	0.776788	0.892948	0.992188	1.09947	1.24023	1.2648	1.48828	1.70562	1.98438	2.44298	3.27653	4.33905	8.6639
0	0.055358	0.116124	0.189345	0.248047	0.248047	0.317304	0.385599	0.496094	0.514738	0.621685	0.733941	0.779782	0.893376	0.992188	1.10002	1.24023	1.2648	1.48828	1.713	1.98438	2.45554	3.27755	4.33905	8.76627
0	0.0553957	0.116548	0.189875	0.248047	0.248047	0.31854	0.38571	0.496094	0.516397	0.62174	0.734947	0.780511	0.894346	0.992188	1.10098	1.24023	1.26554	1.48828	1.71667	1.98438	2.46473	3.30865	4.34257	9.09693
0	0.0554217	0.116868	0.191742	0.248047	0.248047	0.319065	0.388616	0.496094	0.518172	0.622665	0.736329	0.780697	0.894346	0.992188	1.10792	1.24023	1.2705	1.48828	1.73633	1.98438	2.48047	3.32061	4.34327	9.22788
0	0.055465	0.11718	0.191889	0.248047	0.248047	0.319867	0.389234	0.496094	0.5187	0.622858	0.738841	0.781679	0.894346	0.992188	1.1093	1.24023	1.27134	1.48828	1.73633	1.98438	2.48047	3.33669	4.34658	9.54255
0	0.0556427	0.117503	0.192098	0.248047	0.248047	0.32025	0.390094	0.496094	0.521311	0.62368	0.739094	0.781928	0.894346	0.992188	1.1093	1.24023	1.27143	1.48828	1.73633	1.98438	2.48047	3.33713	4.35921	9.6324
0	0.0556944	0.117603	0.193072	0.248047	0.248047	0.320838	0.390255	0.496094	0.525638	0.624154	0.740028	0.783426	0.894346	0.992188	1.1093	1.24023	1.27175	1.48828	1.73633	1.98438	2.48047	3.33713	4.38138	10.1971
0	0.0562057	0.11765	0.193088	0.248047	0.248047	0.322783	0.391235	0.496094	0.527877	0.624863	0.740673	0.783903	0.894346	0.992188	1.1093	1.24023	1.27493	1.48828	1.73633	1.98438	2.48047	3.33713	4.38549	10.2272
0	0.056216	0.117742	0.193283	0.248047	0.248047	0.323509	0.391293	0.496094	0.528687	0.627292	0.74118	0.784393	0.894346	0.992188	1.1093	1.24023	1.27547	1.48828	1.73633	1.99982	2.48047	3.33713	4.3884	10.2453
0	0.0562259	0.118289	0.193327	0.248047	0.248047	0.323548	0.392161	0.496094	0.529767	0.628158	0.741448	0.784393	0.894346	0.992188	1.1093	1.24023	1.27981	1.48828	1.73633	1.99982	2.48047	3.33713	4.3884	10.3171
0	0.0566438	0.118567	0.193435	0.248047	0.248047	0.325032	0.394017	0.496094	0.530938	0.628347	0.743244	0.784393	0.894346	0.992188	1.1093	1.24023	1.28502	1.48828	1.73633	1.99982	2.48047	3.33713	4.3884	10.4121
0	0.056689	0.118765	0.19366	0.248047	0.248047	0.325457	0.394176	0.496094	0.531311	0.628465	0.744141	0.784393	0.894346	0.992188	1.1093	1.24023	1.288	1.48828	1.73633	1.99982	2.48047	3.33713	4.3884	10.4445
0	0.056757	0.118849	0.193908	0.248047	0.248047	0.325458	0.39431	0.496094	0.534223	0.629337	0.744141	0.784393	0.894346	0.992188	1.1093	1.24023	1.28817	1.48828	1.73903	1.99982	2.48047	3.34961	4.3884	10.6053
0	0.0570133	0.119669	0.19409	0.248047	0.248047	0.327165	0.394315	0.496094	0.534612	0.630666	0.744141	0.784393	0.894346	0.992188	1.1093	1.24023	1.29591	1.48828	1.74021	1.99982	2.48047	3.35124	4.3884	10.6053
0	0.0573747	0.120002	0.194318	0.248047	0.248047	0.327929	0.394475	0.496094	0.535289	0.630929	0.744141	0.784393	0.894346	0.992188	1.1093	1.24023	1.29709	1.48828	1.74356	1.99982	2.48047	3.3738	4.3884	10.6689
0	0.0574176	0.12049	0.195158	0.248047	0.248047	0.328617	0.394974	0.496094	0.537751	0.633901	0.744141	0.784393	0.894346	0.992188	1.1093	1.24023	1.29961	1.48828	1.7449	1.99982	2.48047	3.3738	4.39028	10.9253
0	0.0574538	0.120595	0.195528	0.248047	0.248047	0.330187	0.3955	0.496094	0.538105	0.635084	0.744141	0.784393	0.894346	0.992188	1.1093	1.24023	1.30257	1.48828	1.74659	1.99982	2.48047	3.37698	4.40546	10.9253
0	0.0587642	0.120746	0.196109	0.248047	0.248047	0.331737	0.396132	0.496094	0.540093	0.637929	0.744141	0.784393	0.894346	0.992188	1.1093	1.24023	1.30454	1.48828	1.74922	1.99982	2.48047	3.37978	4.40796	11.0736
0	0.0590865	0.120781	0.19613	0.248047	0.248047	0.33202	0.39652	0.496094	0.541914	0.638757	0.744141	0.784393	0.894346	0.992188	1.1093	1.24023	1.31241	1.49271	1.75396	1.99982	2.48047	3.40283	4.41003	11.1649
0	0.059223	0.120854	0.196148	0.248047	0.248047	0.333426	0.396529	0.496094	0.54323	0.639301	0.744141	0.784393	0.894346	0.992188	1.1093	1.24023	1.31319	1.49327	1.75396	1.99982	2.48047	3.41291	4.41007	11.25
0	0.0594093	0.120906	0.197316	0.248047	0.248047	0.334244	0.397637	0.496094	0.543505	0.64033	0.744141	0.784393	0.894346	0.992188	1.1093	1.24023	1.31399	1.49772	1.75396	1.99982	2.48047	3.42222	4.41014	11.3832
0	0.0594726	0.121239	0.197535	0.248047	0.248047	0.334315	0.398444	0.496094	0.544239	0.64263	0.744141	0.784393	0.894346	0.992188	1.1093	1.24023	1.3154	1.49838	1.75396	2.00436	2.48047	3.43575	4.4227	11.6265
0	0.0600116	0.121739	0.197648	0.248047	0.248047	0.334322	0.399174	0.496094	0.544983	0.643476	0.744141	0.784393	0.897532	0.992188	1.1093	1.24023	1.32371	1.50206	1.75396	2.01277	2.48047	3.43642	4.42716	11.6767
0	0.0602728	0.121961	0.198026	0.248047	0.248047	0.336883	0.399692	0.496094	0.545242	0.643505	0.744141	0.784393	0.899112	0.992188	1.11084	1.24023	1.32599	1.50301	1.75396	2.04055	2.48047	3.44507	4.44097	11.7003
0	0.0609182	0.122318	0.198046	0.248047	0.248047	0.337087	0.399875	0.496094	0.54541	0.644322	0.744141	0.784393	0.902717	0.992188	1.1114	1.24023	1.3316	1.50881	1.75396	2.04545	2.49284	3.44598	4.45781	12.1137
0	0.061065	0.122455	0.198757	0.248047	0.248047	0.337345	0.400916	0.496094	0.545678	0.644636	0.744141	0.784393	0.904812	0.992188	1.11272	1.24023	1.33383	1.50881	1.75396	2.05434	2.49284	3.45489	4.47173	12.2451
0	0.0610791	0.1227	0.198981	0.248047	0.248047	0.339124	0.400981	0.496094	0.545795	0.645355	0.744141	0.784393	0.906946	0.992757	1.11703	1.24023	1.33446	1.50881	1.75396	2.05755	2.49284	3.45489	4.47173	12.3576
0	0.0611678	0.122788	0.200065	0.248047	0.248047	0.339584	0.401672	0.496094	0.547487	0.646007	0.744141	0.784393	0.908934	0.993047	1.12455	1.24023	1.33517	1.50881	1.75396	2.0605	2.49284	3.45489	4.47173	12.4506
0	0.0612613	0.123855	0.200477	0.248047	0.248047	0.34209	0.403201	0.496094	0.548184	0.648825	0.744141	0.784393	0.911698	1.00492	1.12671	1.24023	1.33577	1.51174	1.75396	2.06165	2.5195	3.4633	4.47173	12.6017
0	0.0613289	0.124055	0.200852	0.248047	0.248047	0.343162	0.403614	0.496094	0.549173	0.650127	0.744141	0.784393	0.911699	1.0056	1.12681	1.24023	1.33577	1.51212	1.75396	2.06179	2.52575	3.47435	4.49008	12.7545
0	0.0615532	0.124769	0.200997	0.248047	0.248047	0.344314	0.404682	0.496094	0.550162	0.651788	0.744141	0.784393	0.914108	1.00649	1.13069	1.24023	1.33577	1.51646	1.75396	2.06387	2.5538	3.4815	4.56029	12.769
0	0.0618262	0.125726	0.202274	0.248047	0.248047	0.345634	0.405866	0.496094	0.55465	0.651922	0.744141	0.784393	0.917561	1.01063	1.13162	1.24023	1.33577	1.52161	1.75396	2.09055	2.5538	3.4868	4.58413	12.8459
0	0.0620515	0.125754	0.203093	0.248047	0.249331	0.3459	0.40685	0.496094	0.55465	0.65328	0.744141	0.784393	0.919656	1.01139	1.13602	1.24023	1.33577	1.52768	1.75396	2.10475	2.5538	3.4892	4.61394	12.9008
0	0.0625876	0.125914	0.203208	0.248047	0.249741	0.345951	0.407599	0.496094	0.55465	0.655254	0.744141	0.784393	0.920079	1.01269	1.13898	1.24023	1.33577	1.52797	1.75396	2.10475	2.5538	3.50119	4.66038	13.0219
0	0.0626014	0.127231	0.203243	0.248047	0.249917	0.3465	0.409607	0.496094	0.55465	0.657482	0.744141	0.784393	0.921619	1.01273	1.14623	1.24023	1.33577	1.53991	1.75396	2.11229	2.5538	3.50791	4.69007	13.1348
0	0.0630928	0.127798	0.203389	0.248047	0.25154	0.347056	0.412371	0.496094	0.55465	0.657679	0.744141	0.784393	0.92477	1.0149	1.1474	1.24023	1.33577	1.54114	1.75396	2.1186	2.5538	3.50791	4.71193	13.2305
0	0.06337	0.127828	0.203708	0.248047	0.253029	0.347321	0.412481	0.496094	0.55465	0.659362	0.744141	0.784393	0.928199	1.01531	1.1494	1.24023	1.33577	1.54159	1.75396	2.11931	2.5538	3.50791	4.73893	13.2583
0	0.0640194	0.127857	0.203955	0.248047	0.253216	0.347431	0.413176	0.496094	0.55465	0.660179	0.744141	0.784393	0.929004	1.0182	1.15343	1.24023	1.33577	1.5421	1.75396	2.13378	2.5538	3.50791	4.75525	13.3347
0	0.0640254	0.127968	0.204299	0.248047	0.253686	0.34772	0.413887	0.496094	0.55465	0.660528	0.744141	0.784393	0.930407	1.0185	1.15495	1.24023	1.33577	1.55987	1.75396	2.13378	2.5538	3.50791	4.76482	13.3373
0	0.0644428	0.128534	0.204467	0.248047	0.254377	0.348225	0.413915	0.496094	0.55465	0.660568	0.744141	0.784393	0.93045	1.01952	1.15609	1.24023	1.33577	1.56236	1.75396	2.13378	2.5538	3.50791	4.77128	13.3577
0	0.0645594	0.12858	0.204807	0.248047	0.254901	0.348932	0.414391	0.496094	0.55465	0.661786	0.744141	0.784393	0.931465	1.02272	1.15786	1.24023	1.33577	1.56625	1.75396	2.13378	2.58219	3.52541	4.8162	13.4266
0	0.0649207	0.128919	0.204809	0.248047	0.254901	0.349449	0.415508	0.496094	0.55465	0.661791	0.744141	0.784393	0.933398	1.02272	1.16188	1.24023	1.33577	1.56661	1.75396	2.13378	2.58969	3.52541	4.87335	13.6493
0	0.0659079	0.129196	0.205437	0.248047	0.254904	0.350791	0.41593	0.496094	0.55465	0.662198	0.744141	0.784393	0.934031	1.02272	1.16824	1.24023	1.33577	1.56879	1.75396	2.13378	2.58969	3.52665	4.89225	13.6629
0	0.0659405	0.129462	0.205774	0.248047	0.25514	0.350791	0.416431	0.496094	0.55465	0.662999	0.744141	0.784393	0.936553	1.02272	1.16858	1.24023	1.33577	1.56879	1.75396	2.13378	2.58969	3.52888	4.92359	14.0185
0	0.0661344	0.129789	0.205833	0.248047	0.25612	0.350791	0.416596	0.496094	0.55465	0.663479	0.744141	0.784393	0.936567	1.02272	1.16861	1.24023	1.33577	1.57103	1.75396	2.13378	2.58969	3.53088	4.94238	14.1104
0	0.0666912	0.130586	0.206673	0.248047	0.256393	0.350791	0.417951	0.496094	0.55465	0.668073	0.744141	0.784393	0.940051	1.02272	1.17011	1.24023	1.33577	1.57118	1.75396	2.13378	2.58969	3.53889	4.95287	14.367
0	0.0670788	0.130744	0.207098	0.248047	0.257882	0.350791	0.419793	0.496094	0.55465	0.669667	0.744141	0.785661	0.945961	1.02272	1.17293	1.24023	1.33577	1.57334	1.75396	2.13378	2.65494	3.55149	4.98568	14.4486
0	0.0671445	0.130789	0.207651	0.248047	0.259315	0.350791	0.420485	0.496094	0.55465	0.66996	0.744141	0.786316	0.946788	1.02272	1.17354	1.24023	1.33577	1.57892	1.75396	2.13378	2.67155	3.55922	5.01644	15.1309
0	0.0676877	0.13118	0.207752	0.248047	0.260039	0.350791	0.421569	0.496094	0.55465	0.670677	0.744141	0.790358	0.948778	1.02272	1.17425	1.24023	1.33577	1.58319	1.75396	2.13378	2.67155	3.5631	5.02257	15.2302
0	0.068218	0.132236	0.208053	0.248047	0.260082	0.350791	0.422419	0.496094	0.55465	0.671534	0.744141	0.791211	0.951705	1.02272	1.17704	1.24023	1.33577	1.58827	1.75396	2.13378	2.67155	3.56476	5.02257	15.6981
0	0.0683535	0.132245	0.2084	0.248047	0.260129	0.350791	0.422733	0.496094	0.55465	0.673602	0.744141	0.793871	0.956796	1.02272	1.18212	1.24023	1.34073	1.58827	1.75396	2.13378	2.67155	3.57346	5.0895	16.094
0	0.0683729	0.132373	0.208692	0.248047	0.26098	0.350791	0.422784	0.496094	0.55465	0.675591	0.744141	0.794322	0.958113	1.02272	1.18315	1.24023	1.34135	1.58827	1.75396	2.13493	2.68304	3.57738	5.1076	16.3127
0	0.068474	0.132493	0.209209	0.248047	0.261132	0.350791	0.424336	0.496094	0.55465	0.677952	0.744141	0.796404	0.961447	1.02272	1.18434	1.24023	1.34308	1.58827	1.75396	2.14789	2.68304	3.61162	5.1076	16.621
0	0.0687323	0.132585	0.209959	0.248047	0.262289	0.350791	0.42466	0.496094	0.55465	0.678534	0.744141	0.796748	0.962832	1.02272	1.18507	1.24023	1.34771	1.58827	1.75396	2.15174	2.68304	3.61162	5.11362	16.9835
0	0.0690377	0.132902	0.210391	0.248047	0.263799	0.350791	0.425424	0.496094	0.55465	0.679868	0.744141	0.797282	0.963412	1.02272	1.18715	1.24023	1.35024	1.58827	1.75396	2.16372	2.68304	3.61905	5.11362	17.4075
0	0.0701479	0.133077	0.210723	0.248047	0.264126	0.350791	0.42578	0.496094	0.55465	0.680731	0.744141	0.798383	0.963783	1.02272	1.18871	1.24023	1.35513	1.58827	1.75396	2.18716	2.68304	3.62024	5.11362	17.4763
0	0.0703214	0.133544	0.211346	0.248047	0.265508	0.350791	0.4269	0.496094	0.55465	0.682125	0.744141	0.802113	0.96824	1.02272	1.18956	1.24023	1.38	1.58827	1.75396	2.19291	2.68304	3.62601	5.16152	18.0376
0	0.0704637	0.133675	0.212253	0.248047	0.265608	0.350791	0.426943	0.496094	0.55465	0.682171	0.744141	0.802204	0.969438	1.02272	1.19391	1.24023	1.38165	1.58827	1.76355	2.20659	2.69091	3.64773	5.18718
0	0.0705738	0.133868	0.213491	0.248047	0.266476	0.350791	0.427924	0.496094	0.55465	0.68273	0.744141	0.804962	0.97057	1.02272	1.19392	1.24023	1.38433	1.58827	1.76407	2.20663	2.6989	3.68317	5.20898
0	0.0705981	0.134003	0.2139	0.248047	0.267569	0.350791	0.430177	0.496094	0.55465	0.684169	0.744141	0.811502	0.971681	1.02418	1.19611	1.24023	1.38848	1.58827	1.78869	2.21422	2.70878	3.68748	5.21489
0	0.0708366	0.134565	0.214148	0.248047	0.267702	0.350791	0.430694	0.496094	0.55465	0.685009	0.744141	0.812115	0.971847	1.02578	1.19668	1.24023	1.38877	1.58827	1.78869	2.2186	2.72852	3.68748	5.21529
0	0.0710722	0.135614	0.214525	0.248047	0.268333	0.350791	0.433821	0.496094	0.55465	0.685981	0.744141	0.813554	0.973212	1.02734	1.19772	1.24023	1.38947	1.58827	1.78869	2.2186	2.73165	3.68748	5.22657
0	0.0713355	0.135644	0.215056	0.248047	0.268984	0.350791	0.433857	0.496094	0.55465	0.687814	0.744141	0.814272	0.973985	1.028	1.1998	1.24023	1.39013	1.58827	1.78869	2.2186	2.77325	3.68748	5.23255
0	0.0717719	0.136023	0.21649	0.248047	0.269608	0.350791	0.435448	0.496094	0.55465	0.688265	0.744141	0.815471	0.974122	1.0331	1.20283	1.24023	1.39188	1.58827	1.78869	2.2186	2.77325	3.68748	5.23255
0	0.0718986	0.136259	0.21712	0.248047	0.269623	0.350791	0.435724	0.496094	0.55465	0.690723	0.744141	0.816459	0.974271	1.03724	1.20617	1.24023	1.40317	1.58827	1.80581	2.2186	2.77325	3.68748	5.26187
0	0.0720798	0.136983	0.217269	0.248047	0.269767	0.350791	0.435739	0.496094	0.55465	0.69503	0.744141	0.816758	0.977044	1.04192	1.20968	1.24023	1.40317	1.58827	1.80683	2.22547	2.77325	3.68748	5.30264
0	0.0724842	0.137175	0.218219	0.248047	0.271021	0.350791	0.437346	0.496094	0.55465	0.695689	0.744141	0.821024	0.981087	1.04458	1.21173	1.24023	1.40317	1.58827	1.81506	2.22962	2.77325	3.68748	5.30843
0	0.0725046	0.137314	0.218687	0.248047	0.272325	0.350791	0.437517	0.496094	0.55465	0.696806	0.744141	0.822002	0.981249	1.04787	1.21465	1.24023	1.4147	1.58827	1.81585	2.23242	2.77325	3.68748	5.3508
0	0.0728812	0.137666	0.218767	0.248047	0.272981	0.350791	0.437768	0.496094	0.55465	0.696996	0.744141	0.822228	0.982207	1.04967	1.21468	1.24023	1.41496	1.58827	1.82036	2.23242	2.77325	3.68748	5.37418
0	0.0729749	0.137689	0.219672	0.248047	0.273531	0.350791	0.440223	0.496094	0.556259	0.698521	0.744141	0.825298	0.985024	1.05237	1.22097	1.24023	1.41661	1.58827	1.82109	2.23242	2.77325	3.68748	5.38531
0	0.0732395	0.138693	0.21993	0.248047	0.273968	0.350791	0.441125	0.496094	0.556335	0.699638	0.744141	0.829149	0.986833	1.05237	1.22335	1.24023	1.41828	1.58827	1.82252	2.23242	2.77325	3.68748	5.41743
0	0.0733071	0.13904	0.220171	0.248047	0.274367	0.350791	0.442639	0.496094	0.556891	0.700901	0.744141	0.832363	0.987827	1.05237	1.228	1.24023	1.41855	1.58827	1.82494	2.23242	2.79849	3.68748	5.41743
0	0.073469	0.139323	0.220665	0.248047	0.274894	0.350791	0.442851	0.496094	0.556897	0.701583	0.744141	0.833555	0.989829	1.05237	1.22999	1.24023	1.42636	1.58827	1.83544	2.23242	2.80633	3.69794	5.44009
0	0.0736717	0.139808	0.220734	0.248047	0.275175	0.350791	0.443726	0.496094	0.560587	0.701583	0.744141	0.833678	0.990924	1.05237	1.23221	1.2424	1.43006	1.58827	1.83697	2.23242	2.81248	3.7207	5.44237
0	0.0740087	0.140552	0.221121	0.248047	0.275416	0.350791	0.443746	0.496094	0.560914	0.701583	0.744141	0.837379	0.991491	1.05237	1.24023	1.24358	1.43046	1.58827	1.8383	2.23242	2.8262	3.7207	5.53276
0	0.0742164	0.141135	0.22151	0.248047	0.275814	0.350791	0.444382	0.496094	0.561116	0.701583	0.744141	0.837877	0.992188	1.05237	1.24023	1.24687	1.43169	1.58827	1.86139	2.23242	2.82663	3.7207	5.54173
0	0.0743587	0.141689	0.221917	0.248047	0.276778	0.350791	0.445329	0.496094	0.561909	0.701583	0.744141	0.838489	0.992188	1.05237	1.24023	1.24709	1.43414	1.58827	1.8643	2.23242	2.88941	3.7207	5.5465
0	0.0747758	0.142287	0.222831	0.248047	0.279263	0.350791	0.44567	0.496094	0.562218	0.701583	0.744141	0.844926	0.992188	1.05237	1.24023	1.2612	1.43883	1.58827	1.86768	2.23242	2.8927	3.7207	5.5465
0	0.0749197	0.143279	0.22322	0.248047	0.279973	0.350791	0.446775	0.496094	0.563773	0.701583	0.744141	0.847802	0.992188	1.05237	1.24023	1.2612	1.44033	1.58827	1.86875	2.23242	2.93712	3.73563	5.57416
0	0.075144	0.143527	0.223419	0.248047	0.28126	0.350791	0.447089	0.496094	0.565399	0.701583	0.744141	0.851979	0.992188	1.05237	1.24023	1.26126	1.44204	1.59462	1.87344	2.23242	2.93785	3.73649	5.58895
0	0.0757031	0.143705	0.223511	0.248047	0.28155	0.350791	0.447175	0.496094	0.566804	0.701583	0.744141	0.852095	0.992188	1.05237	1.24023	1.26316	1.44635	1.61122	1.87925	2.23342	2.9483	3.7453	5.59326
0	0.0758612	0.143783	0.224126	0.248047	0.282688	0.350791	0.447532	0.496094	0.566856	0.701583	0.744141	0.853338	0.992188	1.05237	1.24023	1.26347	1.44635	1.61533	1.8859	2.23825	2.95052	3.75523	5.61045
0	0.0759955	0.144455	0.224711	0.248047	0.282705	0.350791	0.449026	0.496094	0.568829	0.701583	0.744141	0.854174	0.992188	1.05237	1.24023	1.26457	1.44635	1.62518	1.88628	2.24616	2.95343	3.77814	5.63618
0	0.0760454	0.145247	0.224732	0.248047	0.28358	0.350791	0.449193	0.496094	0.569424	0.701583	0.744141	0.855086	0.992188	1.05237	1.24023	1.2648	1.44635	1.62803	1.88907	2.24616	2.97296	3.77814	5.65634
0	0.0762971	0.145684	0.224868	0.248047	0.283592	0.350791	0.450547	0.496094	0.570608	0.701583	0.744283	0.859848	0.992188	1.05494	1.24023	1.2648	1.44635	1.62843	1.88907	2.24616	2.97656	3.78206	5.65908
0	0.0767645	0.145743	0.225638	0.248047	0.283617	0.350791	0.450873	0.496094	0.570711	0.701583	0.749372	0.861832	0.992188	1.0576	1.24023	1.2648	1.44635	1.63008	1.88907	2.24616	2.97656	3.78627	5.67973
0	0.0769203	0.145895	0.225707	0.248047	0.283971	0.350791	0.453005	0.496094	0.572511	0.701583	0.750335	0.867695	0.992188	1.05901	1.24023	1.2648	1.44635	1.63538	1.92861	2.24616	2.98098	3.78627	5.68217
0	0.0772371	0.1464	0.226031	0.248047	0.284453	0.350791	0.453121	0.496094	0.575546	0.701791	0.750898	0.870311	0.992188	1.06546	1.24023	1.2648	1.44635	1.64963	1.93251	2.24616	2.98642	3.78799	5.69721
0	0.0775249	0.147485	0.226095	0.248047	0.284986	0.350791	0.453992	0.496094	0.575884	0.702149	0.753207	0.873318	0.992188	1.06648	1.24023	1.2648	1.44635	1.6627	1.93731	2.28085	2.98688	3.79589	5.71047
0	0.0775329	0.147746	0.226174	0.248047	0.286044	0.350791	0.454536	0.496094	0.575978	0.706475	0.754961	0.873333	0.992188	1.07539	1.24023	1.2648	1.44635	1.66395	1.93731	2.2811	2.98688	3.82708	5.72661
0	0.0775805	0.148026	0.226656	0.248047	0.288437	0.350791	0.454676	0.496094	0.577356	0.70667	0.755855	0.876887	0.992188	1.07572	1.24023	1.2648	1.44635	1.66395	1.93731	2.28688	2.98688	3.83123	5.7854
0	0.0778177	0.148058	0.226826	0.248047	0.288594	0.350791	0.454987	0.496094	0.577417	0.706752	0.756035	0.877772	0.992188	1.07675	1.24023	1.2648	1.44635	1.66395	1.93731	2.28688	2.98688	3.85072	5.79071
0	0.0778883	0.148063	0.228093	0.248047	0.288739	0.350791	0.456237	0.496094	0.578312	0.707218	0.757089	0.878091	0.992188	1.07992	1.24023	1.2648	1.44635	1.66395	1.93731	2.28688	2.98688	3.8587	5.83154
0	0.0780749	0.148502	0.228625	0.248047	0.289103	0.350791	0.457292	0.496094	0.579641	0.710124	0.757706	0.88188	0.992188	1.08437	1.24023	1.2648	1.45072	1.66395	1.93731	2.28688	2.99716	3.8587	5.86829
0	0.0781467	0.148557	0.229063	0.248047	0.289415	0.351246	0.457844	0.496094	0.581241	0.710972	0.759591	0.881909	0.992188	1.08441	1.24023	1.2648	1.45189	1.66395	1.93731	2.30897	3.01762	3.86077	5.89601
0	0.0796869	0.149082	0.229397	0.248047	0.289883	0.351332	0.459386	0.496094	0.581371	0.712211	0.762048	0.882674	0.992188	1.08494	1.24023	1.2648	1.45254	1.66395	1.93731	2.32263	3.0278	3.87462	5.89601
0	0.0799577	0.149342	0.229705	0.248047	0.290393	0.351662	0.462468	0.496094	0.583031	0.713098	0.762764	0.883046	0.992188	1.08875	1.24023	1.2648	1.45496	1.66395	1.93731	2.32905	3.0278	3.87462	5.94129
0	0.080314	0.149438	0.230103	0.248047	0.290891	0.351971	0.46348	0.49619	0.583439	0.71347	0.76819	0.884596	0.992188	1.08885	1.24023	1.2648	1.45577	1.66395	1.93731	2.34007	3.0278	3.87462	5.95829
0	0.0804347	0.149514	0.230824	0.248047	0.290945	0.352806	0.463599	0.496281	0.585664	0.713508	0.768949	0.885965	0.992188	1.08986	1.24023	1.2648	1.45603	1.66395	1.93731	2.34007	3.0327	3.87462	5.96818
0	0.0804548	0.149585	0.230836	0.248047	0.291874	0.355937	0.465405	0.496798	0.58575	0.714079	0.769787	0.888393	0.992188	1.09511	1.24023	1.2648	1.4657	1.66685	1.93731	2.34007	3.04543	3.87462	6.01393
0	0.0806356	0.150696	0.231113	0.248047	0.29265	0.356731	0.465475	0.496803	0.586219	0.714122	0.771564	0.888671	0.992188	1.09899	1.24023	1.2648	1.47015	1.67717	1.93749	2.34007	3.04571	3.87462	6.03761
0	0.0814158	0.150793	0.231629	0.248047	0.292893	0.361199	0.466357	0.496876	0.587441	0.717305	0.771976	0.888768	0.992188	1.10331	1.24023	1.2648	1.47068	1.67949	1.93762	2.34007	3.05694	3.87462	6.04034
0	0.0816056	0.150876	0.231875	0.248047	0.294552	0.361374	0.467884	0.497826	0.587882	0.717883	0.772482	0.889339	0.992188	1.10416	1.24023	1.2648	1.47312	1.71086	1.95244	2.34007	3.05756	3.87462	6.04034
0	0.0816863	0.150951	0.231884	0.248047	0.294858	0.36439	0.469032	0.497826	0.58868	0.718542	0.773504	0.889812	0.992188	1.10452	1.24023	1.26529	1.47673	1.72414	1.96705	2.34007	3.05773	3.88255	6.06403
0	0.0823622	0.151082	0.232087	0.248047	0.295052	0.364524	0.47014	0.498066	0.589391	0.7193	0.775038	0.890542	0.992188	1.1093	1.24023	1.269	1.48671	1.73266	1.97404	2.35318	3.0624	3.92197	6.11821
0	0.0824406	0.15111	0.23234	0.248047	0.296414	0.364956	0.470194	0.498741	0.589591	0.720983	0.776307	0.893696	0.992188	1.1093	1.24023	1.27408	1.48828	1.73633	1.98112	2.35318	3.06748	3.93384	6.18208
0	0.0826	0.151821	0.232777	0.248047	0.29697	0.365009	0.470301	0.49883	0.590161	0.72106	0.776523	0.894346	0.992188	1.1093	1.24023	1.2752	1.48828	1.73633	1.98438	2.35318	3.06862	3.93392	6.19661
0	0.0830222	0.152082	0.233155	0.248047	0.297715	0.365015	0.470488	0.500447	0.593147	0.723532	0.778424	0.894346	0.992188	1.1093	1.24023	1.27564	1.48828	1.73633	1.98438	2.36107	3.07109	3.93908	6.20117
0	0.0830777	0.152149	0.233379	0.248047	0.297768	0.365482	0.470637	0.500561	0.594489	0.724247	0.78078	0.894346	0.992188	1.1093	1.24023	1.28206	1.48828	1.73633	1.98438	2.36899	3.10802	3.97024	6.37727
0	0.0836482	0.152613	0.233456	0.248047	0.29855	0.366095	0.470798	0.500608	0.595167	0.725023	0.784393	0.894346	0.992188	1.1093	1.24023	1.28502	1.48828	1.73633	1.98438	2.37184	3.10802	4.00732	6.44922
0	0.0836993	0.152648	0.233639	0.248047	0.298663	0.366472	0.471786	0.500805	0.597236	0.725337	0.784393	0.894346	0.992188	1.1093	1.24023	1.28502	1.48828	1.73633	1.98438	2.38617	3.11072	4.00732	6.44922
0	0.0837243	0.152733	0.233873	0.248047	0.298885	0.367288	0.472295	0.501468	0.600306	0.727934	0.784393	0.894346	0.992188	1.1093	1.24023	1.29289	1.48828	1.73633	1.98438	2.40878	3.12543	4.03791	6.55332
0	0.0837948	0.15281	0.234148	0.248047	0.29948	0.367697	0.472295	0.50157	0.600345	0.733825	0.784393	0.894346	0.992188	1.1093	1.24023	1.29439	1.48828	1.73633	1.98438	2.44298	3.13095	4.03791	6.60476
0	0.0838641	0.153108	0.234196	0.248047	0.299714	0.36796	0.47413	0.502162	0.60085	0.734728	0.784393	0.894346	0.992188	1.1093	1.24023	1.29558	1.48828	1.73633	1.98945	2.44614	3.13757	4.03791	6.60476
0	0.0839313	0.153878	0.23422	0.248047	0.301054	0.370544	0.474155	0.502775	0.601427	0.734945	0.784393	0.894346	0.992188	1.1093	1.24023	1.30454	1.48828	1.73633	1.99132	2.45554	3.13757	4.03791	6.60476
0	0.0842325	0.154721	0.235236	0.248047	0.301281	0.370922	0.474712	0.50333	0.601551	0.735159	0.784393	0.894346	0.992188	1.1093	1.24023	1.30482	1.48828	1.73868	1.99157	2.48047	3.14904	4.03791	6.60476
0	0.0844483	0.154785	0.235502	0.248047	0.302758	0.371138	0.475305	0.505928	0.604181	0.737047	0.784393	0.894346	0.992188	1.1093	1.24023	1.305	1.48828	1.74768	1.99982	2.48047	3.14982	4.03791	6.60476
0	0.0845655	0.154939	0.236248	0.248047	0.302829	0.37125	0.47551	0.506165	0.606817	0.738664	0.784393	0.894346	0.992188	1.1093	1.24023	1.30822	1.48828	1.74887	1.99982	2.48047	3.15712	4.06827	6.69727
0	0.0848035	0.155245	0.236761	0.248047	0.303191	0.374863	0.476265	0.510464	0.610794	0.73915	0.784393	0.894346	0.992188	1.1093	1.24023	1.31095	1.48828	1.74943	1.99982	2.48047	3.15712	4.06827	6.73848
0	0.0848477	0.156058	0.237453	0.248047	0.305003	0.375388	0.476584	0.510984	0.611015	0.740028	0.784393	0.894346	0.992188	1.1093	1.24023	1.31953	1.48828	1.75071	1.99982	2.48047	3.16189	4.06827	6.7749
0	0.0849868	0.156224	0.238745	0.248047	0.306337	0.375416	0.476955	0.512498	0.611667	0.740364	0.784393	0.894346	0.992188	1.11066	1.24023	1.32599	1.48828	1.75251	1.99982	2.48047	3.1634	4.06827	6.94531
0	0.0849981	0.156463	0.239079	0.248047	0.306572	0.375877	0.477419	0.513782	0.613434	0.741049	0.784393	0.894346	0.992188	1.11124	1.24023	1.32855	1.48828	1.75396	1.99982	2.48047	3.16832	4.06827	6.94974
0	0.0850324	0.156526	0.23918	0.248047	0.307272	0.375946	0.479315	0.51384	0.613593	0.74141	0.784393	0.894346	0.992188	1.11226	1.24023	1.33142	1.48828	1.75396	1.99982	2.48047	3.17655	4.08037	6.94974
0	0.0850804	0.156638	0.239745	0.248047	0.308386	0.377996	0.47954	0.514236	0.614594	0.74212	0.784393	0.894346	0.994129	1.11267	1.24023	1.3335	1.48828	1.75396	1.99982	2.48047	3.21758	4.08447	6.96301
0	0.085091	0.156755	0.240366	0.248047	0.308412	0.378167	0.480597	0.514648	0.614747	0.742559	0.784393	0.894346	0.995361	1.11416	1.24023	1.33577	1.48828	1.75396	1.99982	2.48047	3.22289	4.12323	7.01583
0	0.0855301	0.157286	0.240702	0.248047	0.310136	0.37819	0.480613	0.514746	0.616409	0.742939	0.784393	0.894346	0.997174	1.11566	1.24023	1.33577	1.48828	1.75396	1.99982	2.48047	3.22461	4.12832	7.02021
0	0.0856744	0.15927	0.240881	0.248047	0.310307	0.380564	0.481305	0.51515	0.618146	0.7436	0.784393	0.894346	0.997531	1.11683	1.24023	1.33577	1.48828	1.75396	1.99982	2.48047	3.22461	4.1302	7.10731
0	0.0858989	0.159276	0.240908	0.248047	0.310449	0.381126	0.481913	0.517424	0.618883	0.744141	0.784393	0.897729	0.999954	1.12127	1.24023	1.33577	1.48828	1.75396	1.99982	2.48047	3.24769	4.1361	7.15477
0	0.0858991	0.159401	0.240933	0.248047	0.311042	0.382666	0.482242	0.517435	0.619296	0.744141	0.784393	0.898697	1.00109	1.12147	1.24023	1.33577	1.48828	1.75396	1.99982	2.48047	3.26132	4.14374	7.19336
0	0.0860422	0.159517	0.24094	0.248047	0.311271	0.382882	0.48258	0.519076	0.61949	0.744141	0.784393	0.902694	1.00216	1.12198	1.24023	1.33577	1.48828	1.75396	1.99982	2.48047	3.26255	4.15802	7.21045
0	0.0862962	0.159762	0.240991	0.248047	0.311568	0.382892	0.483274	0.519912	0.620809	0.744141	0.784393	0.902722	1.00588	1.12264	1.24023	1.33577	1.48828	1.75396	1.99982	2.48047	3.26255	4.1651	7.23175
0	0.08647	0.159961	0.241304	0.248047	0.311623	0.383498	0.484235	0.520358	0.62081	0.744141	0.784393	0.902727	1.006	1.1228	1.24023	1.33577	1.48876	1.75396	1.99982	2.48047	3.26255	4.17307	7.2445
0	0.0866313	0.160117	0.241546	0.248047	0.311914	0.384044	0.484802	0.521821	0.621393	0.744141	0.784393	0.903076	1.00828	1.12438	1.24023	1.33577	1.48897	1.75396	2.00403	2.49284	3.26294	4.17418	7.29949
0	0.0867982	0.160472	0.241671	0.248047	0.312158	0.385384	0.485049	0.52198	0.622695	0.744141	0.784393	0.903094	1.01203	1.12654	1.24023	1.33577	1.49219	1.75396	2.00902	2.49284	3.27122	4.18813	7.32474
0	0.0869771	0.160914	0.242144	0.248047	0.313005	0.385806	0.488097	0.524825	0.624569	0.744141	0.784393	0.906056	1.01319	1.12666	1.24023	1.33577	1.49389	1.75396	2.01525	2.49284	3.27801	4.20124	7.36244
0	0.0870751	0.161972	0.242291	0.248047	0.315963	0.387289	0.488117	0.525186	0.626479	0.744141	0.784393	0.906803	1.01526	1.12882	1.24023	1.33577	1.50112	1.75396	2.03845	2.50613	3.2824	4.20701	7.39995
0	0.0870843	0.162182	0.242398	0.248047	0.316474	0.387299	0.490561	0.52555	0.627514	0.744141	0.784393	0.906967	1.01681	1.12982	1.24023	1.33577	1.50881	1.75396	2.04218	2.50685	3.29562	4.2095	7.49906
0	0.0875071	0.162423	0.243364	0.248047	0.316983	0.387475	0.490628	0.52703	0.628477	0.744141	0.784393	0.906982	1.01824	1.13287	1.24023	1.33577	1.50881	1.75396	2.05868	2.50874	3.30082	4.20989	7.54405
0	0.0878468	0.162617	0.243757	0.248047	0.317379	0.387728	0.491981	0.528902	0.630672	0.744141	0.784393	0.910546	1.01914	1.1342	1.24023	1.33577	1.50881	1.75396	2.07226	2.52959	3.30936	4.2168	7.56035
0	0.087961	0.162739	0.244102	0.248047	0.317482	0.388204	0.49309	0.530291	0.631924	0.744141	0.784393	0.91134	1.01927	1.13678	1.24023	1.33577	1.50881	1.75396	2.07237	2.5538	3.31736	4.2168	7.6614
0	0.0879735	0.162746	0.244104	0.248047	0.317529	0.388622	0.493609	0.531731	0.631973	0.744141	0.784393	0.911549	1.02014	1.13912	1.24023	1.33577	1.50881	1.75396	2.07361	2.5538	3.32885	4.21749	7.68945
0	0.0881705	0.162807	0.244769	0.248047	0.318851	0.388832	0.494539	0.531957	0.632939	0.744141	0.785565	0.91235	1.02227	1.13936	1.24023	1.33577	1.50881	1.75396	2.09018	2.5538	3.3299	4.22409	7.69345
0	0.0882682	0.163081	0.244896	0.248047	0.319351	0.389449	0.496094	0.532245	0.633252	0.744141	0.787046	0.917988	1.02272	1.13939	1.24023	1.33577	1.50881	1.75396	2.1011	2.5538	3.33713	4.22409	7.83216
0	0.0882995	0.163461	0.244905	0.248047	0.319819	0.391785	0.496094	0.532959	0.634327	0.744141	0.789554	0.924663	1.02272	1.1416	1.24023	1.33577	1.50994	1.75396	2.10475	2.5538	3.33713	4.22682	7.9375
0	0.0885573	0.163548	0.245138	0.248047	0.322238	0.391951	0.496094	0.532985	0.63453	0.744141	0.793486	0.928175	1.02272	1.14346	1.24023	1.33577	1.52073	1.75396	2.10475	2.5538	3.33713	4.23386	8.07582
0	0.0886487	0.164406	0.245807	0.248047	0.32432	0.392284	0.496094	0.533811	0.635186	0.744141	0.794744	0.929089	1.02272	1.14469	1.24023	1.33577	1.52077	1.75396	2.10475	2.5538	3.33713	4.23529	8.24546
0	0.088699	0.164509	0.245927	0.248047	0.324616	0.392692	0.496094	0.535751	0.63521	0.744141	0.795348	0.92967	1.02272	1.14614	1.24023	1.33577	1.52616	1.75396	2.11346	2.5538	3.33713	4.2364	8.5243
0	0.0888528	0.164723	0.246092	0.248047	0.324686	0.39276	0.496094	0.535827	0.636167	0.744141	0.797966	0.929698	1.02272	1.14691	1.24023	1.33577	1.53591	1.75396	2.11931	2.5538	3.33713	4.23707	8.73815
0	0.0896743	0.16474	0.246096	0.248047	0.324792	0.392873	0.496094	0.537453	0.636534	0.744141	0.800974	0.929737	1.02272	1.1476	1.24023	1.33577	1.54121	1.75396	2.11931	2.5538	3.33713	4.24361	9.02904
0	0.0897769	0.164768	0.246614	0.248047	0.325003	0.393388	0.496094	0.537659	0.636543	0.744141	0.802583	0.929766	1.02272	1.14889	1.24023	1.33633	1.54233	1.75396	2.11931	2.5538	3.33713	4.25346	9.09693
0	0.0901377	0.1648	0.24701	0.248047	0.325334	0.395011	0.496094	0.537982	0.637776	0.744141	0.804207	0.930506	1.02272	1.14926	1.24023	1.34037	1.54715	1.75396	2.13378	2.57208	3.33713	4.26756	9.12057
0	0.090206	0.16483	0.247114	0.248047	0.326152	0.39506	0.496094	0.538232	0.638515	0.744141	0.807603	0.930904	1.02272	1.15103	1.24023	1.34301	1.5572	1.75396	2.13378	2.58173	3.33713	4.26756	9.52965
0	0.090412	0.164958	0.247274	0.248047	0.326181	0.395572	0.496094	0.539586	0.639301	0.744141	0.80939	0.931954	1.02272	1.15202	1.24023	1.34331	1.56321	1.75396	2.13378	2.58969	3.33713	4.26756	9.77191
0	0.0909499	0.165004	0.247455	0.248047	0.326252	0.395675	0.496094	0.540597	0.63999	0.744141	0.810048	0.933507	1.02272	1.15299	1.24023	1.35024	1.56879	1.75396	2.13378	2.58969	3.33713	4.26756	9.82842
0	0.0910209	0.165179	0.248007	0.248047	0.3263	0.396783	0.496094	0.542946	0.640666	0.744141	0.81037	0.935327	1.02272	1.15831	1.24023	1.35189	1.56879	1.75396	2.13378	2.59311	3.33713	4.26756	9.8378
0	0.0912627	0.16523	0.248047	0.248047	0.326769	0.397129	0.496094	0.543599	0.640896	0.744141	0.810854	0.935808	1.02272	1.16221	1.24023	1.35747	1.56879	1.75396	2.1452	2.61151	3.33713	4.26756	9.99909
0	0.0914969	0.165467	0.248047	0.248047	0.326792	0.3977	0.496094	0.544213	0.641968	0.744141	0.811508	0.938698	1.02272	1.16455	1.24023	1.35879	1.57278	1.75396	2.14537	2.63677	3.34737	4.26756	10.0971
0	0.09172	0.165556	0.248047	0.248047	0.327305	0.399593	0.496094	0.544868	0.643731	0.744141	0.811647	0.938958	1.02291	1.16537	1.24023	1.35973	1.57375	1.75396	2.1506	2.65422	3.35828	4.29389	10.1699
0	0.0918133	0.166083	0.248047	0.248047	0.327517	0.399871	0.496094	0.545607	0.644549	0.744141	0.816196	0.941002	1.02423	1.16994	1.24023	1.36055	1.57647	1.75396	2.16443	2.67125	3.35836	4.30569	10.2453
0	0.0918554	0.167156	0.248047	0.248047	0.327524	0.400376	0.496094	0.546115	0.645094	0.744141	0.81758	0.941524	1.02595	1.1706	1.24023	1.36438	1.57863	1.75569	2.17435	2.67155	3.3738	4.33905	10.2782
0	0.0918738	0.167327	0.248047	0.248047	0.327739	0.401818	0.496094	0.546269	0.646323	0.744141	0.817649	0.941964	1.02626	1.17092	1.24023	1.36503	1.58043	1.75885	2.19979	2.67155	3.3738	4.3884	10.3587
0	0.0927673	0.16733	0.248047	0.248047	0.328467	0.401994	0.496094	0.546522	0.646343	0.744141	0.820255	0.94269	1.02721	1.17107	1.24023	1.36637	1.58827	1.76545	2.2186	2.67155	3.3738	4.3954	10.3617
0	0.0928203	0.167492	0.248047	0.248047	0.328865	0.403173	0.496094	0.547398	0.647128	0.744141	0.823369	0.942773	1.03266	1.17279	1.24023	1.36942	1.58827	1.77299	2.2186	2.67155	3.37861	4.41635	10.3647
0	0.093202	0.168123	0.248047	0.248047	0.329019	0.40348	0.496094	0.547856	0.651169	0.744141	0.825298	0.943208	1.0335	1.17982	1.24023	1.36966	1.58827	1.77389	2.2186	2.67155	3.37968	4.41968	10.4209
0	0.0933515	0.168149	0.248047	0.248047	0.329278	0.404262	0.496094	0.547981	0.652028	0.744141	0.825594	0.943803	1.03384	1.18158	1.24023	1.37489	1.58827	1.77733	2.2186	2.67155	3.38784	4.4372	10.4915
0	0.0935144	0.168409	0.248047	0.248047	0.329805	0.404426	0.496094	0.548975	0.652549	0.744141	0.82714	0.944058	1.03452	1.18369	1.24023	1.37504	1.58827	1.78054	2.22251	2.68304	3.41017	4.4547	10.8971
0	0.0936989	0.168462	0.248047	0.248047	0.330802	0.404809	0.496094	0.55003	0.654124	0.744141	0.827291	0.944154	1.03676	1.18372	1.24023	1.38588	1.58827	1.78312	2.23008	2.68304	3.41755	4.47173	10.8971
0	0.0937407	0.168518	0.248047	0.248047	0.33192	0.40581	0.496094	0.550265	0.65495	0.744141	0.830696	0.945164	1.03754	1.18743	1.24023	1.38848	1.58827	1.78869	2.23138	2.68304	3.43063	4.48879	10.9056
0	0.0937894	0.168568	0.248047	0.248047	0.333095	0.405849	0.496094	0.550834	0.656342	0.744141	0.83177	0.94998	1.03813	1.18756	1.24023	1.39202	1.58827	1.78869	2.23242	2.68457	3.43159	4.52643	10.9843
0	0.0939159	0.169365	0.248047	0.248047	0.334512	0.407823	0.496094	0.553561	0.658163	0.744141	0.832597	0.950772	1.03819	1.18962	1.24023	1.40186	1.58827	1.78869	2.23242	2.70997	3.44047	4.54101	10.9843
0	0.0939924	0.169377	0.248047	0.248047	0.335462	0.407907	0.496094	0.553681	0.658594	0.744141	0.83295	0.952618	1.03932	1.19045	1.24023	1.40275	1.58827	1.78869	2.23242	2.72852	3.44427	4.56865	10.9843
0	0.0943263	0.169468	0.248047	0.248047	0.336537	0.408142	0.496094	0.554509	0.660179	0.744141	0.83482	0.953297	1.04029	1.19326	1.24023	1.40317	1.58827	1.78869	2.23242	2.72852	3.45489	4.57376	11.0095
0	0.0945324	0.169969	0.248047	0.248047	0.336837	0.408213	0.496094	0.55465	0.660605	0.744141	0.835628	0.956108	1.04064	1.19392	1.24023	1.40317	1.58827	1.78869	2.23242	2.73977	3.45489	4.61447	11.14
0	0.0945527	0.170325	0.248047	0.248047	0.337033	0.40829	0.496094	0.55465	0.660756	0.744141	0.83803	0.956239	1.0408	1.19491	1.24023	1.40317	1.58827	1.78869	2.23242	2.75045	3.46586	4.66038	11.25
0	0.0948007	0.170388	0.248047	0.248047	0.338978	0.409059	0.496094	0.55465	0.660956	0.744141	0.839367	0.956835	1.0411	1.19651	1.24023	1.40317	1.58827	1.78869	2.23242	2.76504	3.47068	4.68014	11.2609
0	0.0948812	0.170447	0.248047	0.248047	0.339013	0.410161	0.496094	0.55465	0.661199	0.744141	0.839674	0.958444	1.04122	1.19936	1.24023	1.40317	1.58827	1.79594	2.23242	2.77325	3.47266	4.71941	11.2963
0	0.0950969	0.171693	0.248047	0.248047	0.340231	0.410418	0.496094	0.55465	0.661372	0.744141	0.841481	0.960007	1.04304	1.20201	1.24023	1.40562	1.58827	1.79624	2.23242	2.77325	3.48345	4.73893	11.3371
0	0.0952856	0.172998	0.248047	0.248047	0.340573	0.411084	0.496094	0.55465	0.66356	0.744141	0.843687	0.960775	1.04537	1.20268	1.24597	1.41321	1.58827	1.80581	2.23242	2.77325	3.48466	4.76482	11.5767
0	0.0960714	0.173404	0.248047	0.248047	0.340707	0.41156	0.496094	0.55465	0.663995	0.744141	0.843699	0.9609	1.04596	1.21324	1.24977	1.42381	1.58827	1.80581	2.23242	2.77325	3.50791	4.76482	11.6265
0	0.0961227	0.173605	0.248047	0.248047	0.340722	0.411678	0.496094	0.55465	0.665209	0.744141	0.845261	0.961333	1.04664	1.21822	1.25263	1.42474	1.58827	1.80581	2.23242	2.77325	3.50791	4.79643	11.7003
0	0.0961414	0.173964	0.248047	0.248047	0.3423	0.413626	0.496094	0.55465	0.665558	0.744141	0.845757	0.961447	1.04803	1.21887	1.25396	1.42544	1.58827	1.80938	2.23242	2.77325	3.50791	4.8162	11.87
0	0.0961808	0.174024	0.248047	0.248047	0.342391	0.414641	0.496094	0.55465	0.668066	0.744141	0.8498	0.962787	1.04937	1.22439	1.25605	1.42636	1.58827	1.81501	2.23242	2.77325	3.50791	4.8162	11.87
0	0.0966906	0.174627	0.248047	0.248047	0.342616	0.415282	0.496094	0.55465	0.669223	0.744141	0.851307	0.962854	1.05137	1.22688	1.25789	1.42703	1.58827	1.81756	2.23242	2.77325	3.50791	4.8162	11.9726
0	0.0967625	0.174832	0.248047	0.248047	0.343015	0.415339	0.496094	0.55465	0.66956	0.744141	0.853903	0.964454	1.05237	1.23049	1.25941	1.42808	1.58827	1.8195	2.23498	2.77325	3.50791	4.87335	12.4048
0	0.0968848	0.174928	0.248047	0.248047	0.345068	0.415646	0.496094	0.55465	0.671394	0.744141	0.854023	0.967603	1.05237	1.23183	1.2612	1.43389	1.58827	1.81992	2.24159	2.77325	3.50791	4.87335	12.4568
0.00289536	0.0972916	0.175634	0.248047	0.248047	0.346444	0.416928	0.496094	0.55465	0.67223	0.744141	0.855908	0.969499	1.05237	1.24023	1.2612	1.43411	1.58827	1.82639	2.24512	2.80633	3.50791	4.91824	12.4642
0.00338518	0.0974437	0.175821	0.248047	0.248047	0.346499	0.418421	0.496094	0.55465	0.673902	0.744141	0.860429	0.97113	1.05237	1.24023	1.26347	1.43598	1.58827	1.82984	2.24616	2.81138	3.50791	4.96094	12.4642
0.00744244	0.0976197	0.176207	0.248047	0.248195	0.348075	0.418701	0.496094	0.55465	0.674059	0.744141	0.861737	0.974867	1.05237	1.24023	1.2648	1.4389	1.58827	1.82991	2.24616	2.81564	3.50791	4.96094	12.8051
0.00793168	0.097666	0.176314	0.248047	0.249512	0.348339	0.419982	0.496094	0.55465	0.676173	0.744141	0.863478	0.975026	1.05237	1.24023	1.2648	1.44185	1.58827	1.83378	2.24616	2.81591	3.50791	4.99185	12.8913
0.00861048	0.0979591	0.176401	0.248047	0.249554	0.349852	0.420919	0.496094	0.55465	0.676239	0.744141	0.864089	0.975711	1.05237	1.24023	1.2648	1.44529	1.58827	1.84435	2.24616	2.82667	3.50791	5.01388	12.9793
0.00891072	0.0980464	0.176577	0.248047	0.249846	0.350791	0.421479	0.496094	0.55465	0.67624	0.744141	0.864825	0.976943	1.05237	1.24023	1.2648	1.44635	1.58827	1.85551	2.24616	2.82796	3.50791	5.03447	12.9959
0.00893744	0.0981028	0.177041	0.248047	0.25023	0.350791	0.42179	0.496094	0.55465	0.676361	0.744141	0.86647	0.977149	1.05237	1.24023	1.2648	1.44635	1.58827	1.86166	2.24616	2.82817	3.52541	5.04413	13.0904
0.00975301	0.0982569	0.177058	0.248047	0.250394	0.350791	0.421916	0.496094	0.55465	0.676802	0.744141	0.867145	0.977913	1.05237	1.24023	1.2648	1.44635	1.59422	1.86221	2.24616	2.82817	3.52541	5.05918	13.1348
0.00989238	0.0983569	0.177234	0.248047	0.250596	0.350791	0.421937	0.496094	0.55465	0.677338	0.744141	0.86729	0.978701	1.05237	1.24023	1.2648	1.44635	1.59596	1.864	2.28338	2.82817	3.52541	5.05918	13.1488
0.0101336	0.0986162	0.177329	0.248047	0.25066	0.350791	0.422389	0.496094	0.55465	0.679438	0.744141	0.868163	0.979108	1.05237	1.24023	1.2648	1.44635	1.59884	1.87685	2.28688	2.82817	3.55149	5.05918	13.1815
0.0103543	0.098708	0.177575	0.248047	0.250681	0.350791	0.42318	0.496094	0.55465	0.681371	0.744141	0.868777	0.980527	1.05237	1.24023	1.2648	1.44635	1.60234	1.8806	2.28688	2.82817	3.55149	5.1076	13.1862
0.0103647	0.0987893	0.177623	0.248047	0.251089	0.350791	0.423408	0.496094	0.55465	0.681942	0.744141	0.869096	0.982207	1.05237	1.24023	1.2648	1.44635	1.60781	1.88484	2.28688	2.83124	3.56154	5.11362	13.2676
0.0105076	0.098845	0.178749	0.248047	0.251416	0.350791	0.425714	0.496094	0.55465	0.682369	0.744141	0.869524	0.98261	1.05237	1.24023	1.2648	1.44635	1.62346	1.88907	2.28688	2.83355	3.57738	5.11362	13.3347
0.0106183	0.0988973	0.178756	0.248047	0.251579	0.350791	0.426461	0.496094	0.55465	0.684248	0.744141	0.871376	0.98379	1.05237	1.24023	1.2648	1.44635	1.62434	1.88907	2.28688	2.84129	3.58305	5.11362	13.3347
0.0110555	0.0989172	0.17877	0.248047	0.25179	0.350791	0.426461	0.496094	0.55465	0.686781	0.744141	0.871571	0.983921	1.05424	1.24023	1.2648	1.44635	1.62601	1.89308	2.28688	2.86366	3.6065	5.1358	13.4244
0.0111075	0.0994223	0.178925	0.248047	0.251808	0.350791	0.427112	0.496094	0.55465	0.686914	0.744141	0.873732	0.984193	1.0587	1.24023	1.2648	1.44635	1.65866	1.89447	2.28688	2.88915	3.61162	5.14546	13.5362
0.011672	0.0996434	0.179559	0.248047	0.251863	0.350791	0.427166	0.496094	0.55465	0.68756	0.744141	0.873876	0.985163	1.05906	1.24023	1.2648	1.44635	1.66217	1.89947	2.28834	2.89055	3.61162	5.16552	13.7213
0.0117515	0.100038	0.179941	0.248047	0.252411	0.350791	0.428526	0.496094	0.55465	0.689206	0.744141	0.874692	0.987446	1.06351	1.24023	1.2648	1.44635	1.66337	1.90901	2.29643	2.8927	3.65847	5.16603	13.7839
0.0121378	0.100141	0.180053	0.248047	0.252858	0.350791	0.428815	0.496094	0.55465	0.689659	0.745491	0.874884	0.988461	1.06524	1.24023	1.2648	1.44635	1.66395	1.91	2.2995	2.8927	3.66237	5.1903	14.1104
0.0121543	0.100666	0.180403	0.248047	0.253018	0.350791	0.430128	0.496094	0.55465	0.690445	0.745566	0.880852	0.988998	1.06636	1.24023	1.2648	1.44635	1.66395	1.91749	2.30493	2.8927	3.66705	5.20898	14.1436
0.0122357	0.101117	0.180902	0.248047	0.253363	0.350791	0.430869	0.496094	0.55465	0.690973	0.748146	0.881909	0.989128	1.06723	1.24023	1.2648	1.44635	1.66572	1.93731	2.30943	2.8927	3.68748	5.21489	14.4486
0.013178	0.101299	0.181028	0.248047	0.253729	0.350791	0.431146	0.496094	0.55465	0.69195	0.748304	0.882064	0.992188	1.06836	1.24023	1.2648	1.44635	1.67689	1.93731	2.33155	2.89564	3.68748	5.21489	14.9571
0.0132937	0.101328	0.181169	0.248047	0.254048	0.350791	0.431924	0.496094	0.55465	0.69239	0.749175	0.883431	0.992188	1.06933	1.24023	1.2648	1.45228	1.67849	1.93731	2.33693	2.90163	3.68748	5.21862	15.4209
0.0134318	0.101574	0.181236	0.248047	0.2547	0.350791	0.432245	0.496094	0.55465	0.694093	0.749875	0.883601	0.992188	1.06955	1.24023	1.2648	1.45532	1.68145	1.93731	2.34007	2.90331	3.68748	5.23255	15.7759
0.0137213	0.101651	0.181612	0.248047	0.255019	0.350791	0.433781	0.496094	0.55465	0.694764	0.751749	0.884908	0.992188	1.07133	1.24023	1.2648	1.45623	1.68229	1.93731	2.34007	2.90331	3.68748	5.23255	16.1228
0.0137772	0.101913	0.181668	0.248047	0.255057	0.350791	0.434681	0.496094	0.55465	0.696094	0.752109	0.885882	0.992188	1.07144	1.24023	1.2648	1.46448	1.68442	1.93731	2.34007	2.9083	3.68748	5.25602	16.3127
0.0138912	0.102351	0.181711	0.248047	0.255826	0.350791	0.435739	0.496094	0.55465	0.69623	0.752606	0.8861	0.992188	1.07454	1.24023	1.2648	1.47795	1.69069	1.93731	2.34007	2.90965	3.68748	5.26187	16.6709
0.0142081	0.102608	0.181738	0.248047	0.255992	0.350791	0.43589	0.496094	0.55465	0.69649	0.753171	0.886835	0.992188	1.07652	1.24023	1.2648	1.4858	1.70616	1.93731	2.34007	2.91882	3.68748	5.28967	16.9563
0.0143803	0.102997	0.182058	0.248047	0.257106	0.350791	0.436152	0.496094	0.55465	0.696745	0.754159	0.888369	0.992188	1.07804	1.24023	1.2648	1.48828	1.71116	1.93731	2.34007	2.92825	3.68748	5.30593	17.2299
0.0144725	0.10308	0.182076	0.248047	0.257128	0.350791	0.438839	0.496094	0.55465	0.698371	0.754205	0.888496	0.992188	1.08494	1.24023	1.26969	1.48828	1.71955	1.93731	2.34007	2.95448	3.68748	5.30843	17.7505
0.0147233	0.103295	0.182955	0.248047	0.257642	0.350791	0.438907	0.496094	0.55465	0.698548	0.754609	0.88854	0.992188	1.08513	1.24023	1.26977	1.48828	1.7298	1.93731	2.34007	2.9666	3.68748	5.33729	18.7632
0.0148336	0.103394	0.18316	0.248047	0.257806	0.350791	0.439807	0.496094	0.55465	0.699775	0.75538	0.888648	0.992188	1.08523	1.24023	1.27227	1.48828	1.73633	1.93731	2.34007	2.9816	3.68748	5.34309
0.0151776	0.103447	0.183591	0.248047	0.258407	0.350791	0.439893	0.496094	0.55465	0.701583	0.757167	0.889499	0.992188	1.08621	1.24023	1.27243	1.48828	1.73633	1.96668	2.34516	2.98407	3.68748	5.36944
0.0154388	0.104053	0.183647	0.248047	0.258904	0.350791	0.440066	0.496094	0.55465	0.701583	0.757813	0.891605	0.992188	1.08782	1.24023	1.27267	1.48828	1.73633	1.98438	2.35318	2.98493	3.68748	5.37118
0.0154478	0.104269	0.18394	0.248047	0.259016	0.350791	0.440166	0.496094	0.55465	0.701583	0.762005	0.89294	0.992188	1.09345	1.24023	1.27359	1.48828	1.73633	1.98438	2.35318	2.98688	3.68748	5.43312
0.0154632	0.104325	0.184036	0.248047	0.259195	0.350791	0.441347	0.496094	0.55465	0.701583	0.762851	0.894346	0.992188	1.09546	1.24023	1.27564	1.48828	1.73633	1.98438	2.35318	2.98688	3.7207	5.44503
0.0158827	0.104701	0.184099	0.248047	0.259915	0.350791	0.441448	0.496094	0.555274	0.701583	0.764581	0.894346	0.992188	1.09717	1.24023	1.2791	1.48828	1.73633	1.98438	2.35318	2.98688	3.7207	5.45988
0.0159985	0.104737	0.184304	0.248047	0.259994	0.350791	0.441852	0.496094	0.556221	0.701583	0.764827	0.894346	0.992188	1.09964	1.24023	1.28502	1.48828	1.73633	1.98438	2.3963	2.98688	3.73269	5.47953
0.0164951	0.105109	0.185081	0.248047	0.26024	0.350791	0.443233	0.496094	0.55722	0.701583	0.768788	0.894346	0.992188	1.10142	1.24023	1.28502	1.48828	1.73633	1.98438	2.4001	2.98688	3.73752	5.49075
0.0178598	0.105218	0.185247	0.248047	0.260859	0.350791	0.443699	0.496094	0.557369	0.701583	0.768949	0.894346	0.992188	1.105	1.24023	1.28887	1.48828	1.73633	1.98438	2.40124	2.99716	3.73896	5.49075
0.0178822	0.105338	0.185586	0.248047	0.261181	0.350791	0.445255	0.496094	0.55902	0.701583	0.769469	0.894346	0.992188	1.10568	1.24023	1.29232	1.48828	1.73633	1.98438	2.42391	3.01122	3.75363	5.50753
0.0179714	0.105788	0.185825	0.248047	0.261253	0.350791	0.445498	0.496094	0.560524	0.701583	0.769599	0.894346	0.992188	1.10604	1.24023	1.29268	1.48828	1.73633	1.98438	2.44298	3.02254	3.77814	5.50787
0.0180282	0.106359	0.185964	0.248047	0.261727	0.350791	0.445896	0.496094	0.561985	0.701583	0.770411	0.894346	0.992188	1.10821	1.24023	1.2998	1.48828	1.73633	1.98438	2.44298	3.0256	3.78627	5.5465
0.0182146	0.106375	0.186408	0.248047	0.262078	0.350791	0.446673	0.496094	0.562146	0.701583	0.772416	0.894346	0.992188	1.1093	1.24023	1.30024	1.48828	1.73633	1.98438	2.44298	3.0278	3.79439	5.5465
0.0184044	0.106423	0.186938	0.248047	0.262107	0.350791	0.447425	0.496094	0.570146	0.701583	0.774532	0.894346	0.992188	1.1093	1.24023	1.30454	1.48828	1.73633	1.98438	2.45554	3.03607	3.81353	5.57416
0.0188846	0.106433	0.187051	0.248047	0.262147	0.350791	0.447868	0.496094	0.570412	0.701583	0.77455	0.894346	0.992188	1.1093	1.24023	1.30502	1.48828	1.73633	1.98438	2.47253	3.06885	3.81892	5.59879
0.0189427	0.106441	0.187163	0.248047	0.263022	0.350791	0.447959	0.496094	0.571953	0.701583	0.776726	0.894346	0.992188	1.1093	1.24023	1.3099	1.48828	1.7428	1.98438	2.48047	3.08485	3.84522	5.65592
0.0192975	0.106729	0.187214	0.248047	0.263611	0.350791	0.449255	0.496094	0.573594	0.701583	0.77705	0.894346	0.992188	1.1093	1.24023	1.31669	1.48828	1.74802	1.99197	2.48047	3.11154	3.85718	5.65634
0.0193114	0.106796	0.187561	0.248047	0.263642	0.350791	0.449811	0.496094	0.574262	0.701583	0.778492	0.894346	0.992188	1.1093	1.24023	1.3168	1.48828	1.74813	1.99933	2.48047	3.12116	3.8587	5.66688
0.0193957	0.107005	0.188349	0.248047	0.263768	0.350791	0.450069	0.496094	0.574618	0.701583	0.779744	0.894346	0.992188	1.1093	1.24023	1.31749	1.48828	1.74896	1.99982	2.48047	3.13403	3.8587	5.66721
0.0195395	0.107454	0.188526	0.248047	0.264187	0.350791	0.450832	0.496094	0.574626	0.701583	0.781125	0.894346	0.992188	1.1093	1.24023	1.32798	1.48828	1.74954	1.99982	2.48047	3.13757	3.86524	5.67018
0.0196137	0.107479	0.189414	0.248047	0.264294	0.350791	0.451512	0.496094	0.575106	0.701583	0.784393	0.894346	0.992188	1.1093	1.24023	1.33139	1.48828	1.75262	1.99982	2.48047	3.13757	3.87462	5.67734
0.0197505	0.10764	0.189984	0.248047	0.264314	0.350791	0.451917	0.496094	0.57546	0.701583	0.784393	0.894346	0.992188	1.1093	1.24023	1.33238	1.48828	1.75396	1.99982	2.48047	3.13757	3.87462	5.70174
0.019768	0.10792	0.19035	0.248047	0.265664	0.350791	0.452147	0.496094	0.577211	0.705942	0.784393	0.894346	0.992188	1.1093	1.24023	1.33274	1.48828	1.75396	1.99982	2.48047	3.14759	3.87462	5.70185
0.0199184	0.108166	0.190797	0.248047	0.26596	0.350791	0.452487	0.496094	0.577869	0.708225	0.784393	0.894346	0.992188	1.1093	1.24023	1.33577	1.48828	1.75396	1.99982	2.48047	3.14794	3.87462	5.75212
0.0202614	0.108364	0.191965	0.248047	0.266069	0.350791	0.452821	0.496094	0.580977	0.708758	0.784393	0.894346	0.992188	1.1093	1.24023	1.33577	1.48828	1.75396	1.99982	2.48047	3.15111	3.87462	5.78145
0.020266	0.108448	0.192434	0.248047	0.266685	0.350791	0.453673	0.496094	0.581231	0.709803	0.784393	0.894346	0.992188	1.1093	1.24023	1.33577	1.48828	1.75396	1.99982	2.48047	3.15462	3.88255	5.803
0.0209897	0.10868	0.192614	0.248047	0.267402	0.350791	0.454342	0.496094	0.582046	0.710526	0.784393	0.894346	0.992188	1.1093	1.24023	1.33577	1.48828	1.75396	1.99982	2.48047	3.15502	3.88665	5.80663
0.0210639	0.109433	0.192662	0.248047	0.267677	0.350791	0.454346	0.496094	0.583182	0.710884	0.784393	0.894346	0.992188	1.1093	1.24023	1.33577	1.48828	1.75396	2.00451	2.48047	3.15712	3.91862	5.80821
0.0210785	0.109466	0.193088	0.248047	0.268261	0.350791	0.456582	0.496094	0.583761	0.714912	0.784393	0.894346	0.992188	1.1093	1.24023	1.33577	1.48828	1.75396	2.00502	2.48047	3.15712	3.92197	5.81446
0.0211554	0.109762	0.193187	0.248047	0.269191	0.350791	0.456928	0.496094	0.583834	0.715039	0.784393	0.894346	0.992188	1.1093	1.24023	1.33577	1.48828	1.75396	2.00939	2.48047	3.15712	3.92197	5.89601
0.0212931	0.110134	0.193307	0.248047	0.269797	0.350791	0.457672	0.496094	0.58415	0.716264	0.784393	0.894346	0.992188	1.1093	1.24023	1.33577	1.48931	1.75396	2.0246	2.48047	3.15712	3.92197	5.91588
0.0214833	0.110351	0.193328	0.248047	0.270319	0.350791	0.458268	0.496094	0.584862	0.716619	0.784393	0.894346	0.992188	1.1093	1.24023	1.33577	1.50057	1.75396	2.03006	2.48047	3.15712	3.92197	5.94335
0.0214919	0.110871	0.193484	0.248047	0.270847	0.350791	0.459575	0.496094	0.58587	0.718796	0.784393	0.894346	0.992188	1.1093	1.24023	1.33577	1.5064	1.75396	2.03627	2.48047	3.15712	3.92197	5.95829
0.0215815	0.110889	0.193599	0.248047	0.271193	0.350791	0.460104	0.496094	0.587164	0.7193	0.784393	0.894346	0.992188	1.1093	1.24023	1.33577	1.50881	1.75396	2.04189	2.48047	3.16168	3.9371	5.99945
0.0218144	0.110976	0.19373	0.248047	0.271282	0.350791	0.460453	0.496094	0.589898	0.720521	0.784393	0.894346	0.992188	1.1093	1.24023	1.33577	1.50881	1.75396	2.04367	2.48336	3.16236	3.94153	5.99945
0.0218454	0.111351	0.194517	0.248047	0.271285	0.350791	0.46056	0.496094	0.590488	0.721461	0.784393	0.897735	0.992188	1.1093	1.24023	1.33577	1.50881	1.75396	2.04545	2.49284	3.17568	3.94482	6.08094
0.0220504	0.111428	0.195044	0.248047	0.271625	0.350791	0.460703	0.496094	0.590659	0.722913	0.784393	0.898087	0.992188	1.1093	1.24023	1.33577	1.50881	1.75396	2.04545	2.49284	3.17655	3.9473	6.20117
0.0222016	0.111567	0.195158	0.248047	0.271694	0.350791	0.461966	0.496094	0.59066	0.723249	0.784393	0.898515	0.992188	1.1093	1.24023	1.33577	1.50881	1.75396	2.04545	2.49284	3.17655	3.94952	6.27514
0.0222759	0.111706	0.195199	0.248047	0.271754	0.350791	0.462801	0.497948	0.593612	0.723968	0.784393	0.900207	0.992188	1.1093	1.24023	1.33577	1.50881	1.75396	2.04545	2.49284	3.17655	3.95869	6.33856
0.0223586	0.111837	0.195236	0.248047	0.272502	0.350791	0.462908	0.498498	0.594431	0.725505	0.784393	0.902847	0.992188	1.10998	1.24023	1.33577	1.50881	1.75396	2.05628	2.49895	3.17655	3.96118	6.36672
0.0223772	0.112024	0.195812	0.248047	0.273006	0.350791	0.463068	0.498789	0.594887	0.726693	0.784393	0.906678	0.992188	1.11022	1.24023	1.33577	1.50881	1.75396	2.09872	2.50577	3.17655	3.96875	6.40134
0.0224907	0.112348	0.195962	0.248047	0.27522	0.350933	0.463485	0.500389	0.595063	0.727042	0.784393	0.906988	0.992188	1.11101	1.24023	1.33577	1.51673	1.75396	2.09985	2.50893	3.17655	3.97649	6.40134
0.0227474	0.112374	0.196178	0.248047	0.275636	0.350949	0.463743	0.501151	0.596013	0.729124	0.784393	0.908155	0.992188	1.11161	1.24023	1.33577	1.52479	1.75396	2.10338	2.51539	3.17655	3.97649	6.40134
0.0229524	0.112709	0.196711	0.248047	0.276168	0.351265	0.465091	0.502527	0.597318	0.730198	0.784393	0.908714	0.992188	1.11855	1.24023	1.33577	1.53088	1.75396	2.10588	2.52585	3.17655	3.97649	6.40134
0.0232441	0.112752	0.19694	0.248047	0.276665	0.351491	0.465297	0.502868	0.597504	0.7322	0.784393	0.909147	0.992188	1.1191	1.24023	1.33785	1.53187	1.75396	2.11468	2.52959	3.17655	3.97954	6.45399
0.0233164	0.112887	0.197024	0.248047	0.276678	0.351686	0.465561	0.503001	0.598456	0.733693	0.784393	0.910386	0.992188	1.11921	1.24023	1.33792	1.53747	1.75396	2.11931	2.52959	3.17655	4.00732	6.45399
0.0236114	0.112936	0.197412	0.248047	0.278759	0.351769	0.467308	0.505627	0.599849	0.733812	0.784393	0.912841	0.992188	1.11999	1.24023	1.33988	1.53758	1.75396	2.11931	2.54191	3.17655	4.00744	6.46827
0.0237828	0.113102	0.197986	0.248047	0.279088	0.352433	0.467682	0.507821	0.600594	0.733817	0.784393	0.913073	0.992188	1.12078	1.24023	1.33992	1.53827	1.75396	2.12747	2.5538	3.17655	4.01113	6.54863
0.0238416	0.113243	0.198122	0.248047	0.279149	0.353105	0.469158	0.508098	0.600674	0.734624	0.784393	0.913609	0.992188	1.12248	1.24023	1.3404	1.54666	1.75396	2.13378	2.5538	3.18136	4.01422	6.54863
0.0238538	0.1134	0.198139	0.248047	0.279304	0.353468	0.46932	0.508447	0.60134	0.735962	0.784393	0.914156	0.992188	1.12374	1.24023	1.34243	1.54932	1.75396	2.13378	2.5538	3.18404	4.01838	6.55332
0.0239442	0.113469	0.198561	0.248047	0.28029	0.353633	0.46935	0.509078	0.602907	0.736195	0.784393	0.916822	0.992188	1.1256	1.24023	1.3501	1.55065	1.75396	2.13378	2.5538	3.20142	4.02781	6.56739
0.024572	0.11356	0.199032	0.248047	0.281037	0.35385	0.469957	0.509324	0.603572	0.736813	0.784393	0.918183	0.992188	1.13642	1.24023	1.35049	1.55781	1.75396	2.13378	2.5538	3.20152	4.03145	6.60476
0.0259799	0.113939	0.199059	0.248047	0.28104	0.353986	0.470415	0.509404	0.603871	0.737868	0.784393	0.919298	0.995585	1.13888	1.24023	1.35221	1.56276	1.75396	2.13378	2.5538	3.21414	4.03418	6.67887
0.026237	0.114426	0.199299	0.248047	0.281476	0.354333	0.470455	0.509811	0.604058	0.740028	0.784393	0.92022	0.99664	1.14264	1.24023	1.35238	1.5643	1.75396	2.1388	2.5538	3.21596	4.03791	6.69727
0.0263093	0.114726	0.199491	0.248047	0.281496	0.356976	0.470489	0.510078	0.604792	0.743473	0.784393	0.921564	0.99683	1.14291	1.24023	1.35487	1.568	1.75396	2.14918	2.58969	3.21698	4.03791	6.7476
0.0265827	0.11494	0.19965	0.248047	0.281624	0.357141	0.471302	0.510977	0.605317	0.744141	0.784393	0.921772	0.997816	1.14715	1.24023	1.36018	1.56879	1.75396	2.14949	2.58969	3.22461	4.0566	6.77036
0.0266151	0.115196	0.199861	0.248047	0.282072	0.357232	0.472202	0.511326	0.608222	0.744141	0.784393	0.92261	0.9981	1.15007	1.24023	1.36475	1.56879	1.75396	2.14997	2.58969	3.22461	4.0605	6.77036
0.0266454	0.115214	0.199866	0.248047	0.282317	0.357484	0.472295	0.511723	0.608587	0.744141	0.784393	0.923399	0.999292	1.15022	1.24023	1.37181	1.56879	1.75396	2.15115	2.58969	3.22461	4.06827	6.7749
0.0266685	0.115368	0.199951	0.248047	0.283439	0.35775	0.472295	0.513136	0.608688	0.744141	0.784393	0.92442	1.00092	1.15534	1.24023	1.3829	1.56879	1.75396	2.16966	2.6098	3.22461	4.06827	6.81113
0.0267068	0.115554	0.19997	0.248047	0.283445	0.358218	0.472295	0.513945	0.611368	0.744141	0.784393	0.924561	1.001	1.15544	1.24023	1.39538	1.57375	1.75924	2.17086	2.61186	3.22722	4.06827	6.81113
0.0267871	0.115869	0.200543	0.248047	0.28358	0.358265	0.472295	0.514739	0.611744	0.744141	0.786147	0.925058	1.00289	1.15719	1.24023	1.39996	1.58387	1.76548	2.18359	2.62823	3.23091	4.06827	6.89195
0.0269656	0.115996	0.200688	0.248047	0.284381	0.358549	0.472295	0.515111	0.611752	0.744141	0.786829	0.927801	1.0051	1.16801	1.24023	1.40166	1.58393	1.76625	2.20414	2.63677	3.23414	4.07881	6.89642
0.027078	0.116028	0.200852	0.248047	0.28494	0.359013	0.47368	0.515251	0.613191	0.744141	0.787294	0.929878	1.00539	1.1686	1.24023	1.40303	1.58827	1.77047	2.20964	2.63677	3.23414	4.07946	7.05082
0.0270814	0.116193	0.201221	0.248047	0.285368	0.359579	0.474307	0.516318	0.613421	0.744141	0.788363	0.932307	1.00815	1.17584	1.24023	1.40317	1.58827	1.7706	2.2186	2.63842	3.23845	4.09089	7.19336
0.027092	0.11693	0.201808	0.248047	0.285598	0.359927	0.474984	0.516351	0.613473	0.744141	0.788558	0.932617	1.01007	1.1765	1.24023	1.40317	1.58827	1.77062	2.2186	2.65828	3.25042	4.10591	7.19763
0.027297	0.117149	0.202791	0.248047	0.287437	0.360965	0.475939	0.517506	0.613691	0.744141	0.790441	0.933913	1.01062	1.17982	1.24023	1.40317	1.58827	1.7822	2.21958	2.67155	3.25517	4.11144	7.26146
0.0273147	0.117217	0.203281	0.248047	0.287615	0.361022	0.476386	0.518487	0.614483	0.744141	0.792331	0.934627	1.01255	1.17996	1.24023	1.40317	1.58827	1.78621	2.23137	2.67155	3.26255	4.11199	7.34571
0.0278454	0.117403	0.203383	0.248047	0.287799	0.361022	0.476989	0.518554	0.614701	0.744141	0.792944	0.935272	1.0129	1.18155	1.24023	1.40317	1.58827	1.78815	2.23242	2.67155	3.26664	4.12832	7.37496
0.0278998	0.117694	0.203823	0.248047	0.288435	0.363385	0.477664	0.51886	0.614883	0.744141	0.794783	0.935273	1.01296	1.18457	1.24023	1.40317	1.58827	1.78869	2.23242	2.67155	3.2866	4.13304	7.47852
0.0279053	0.117733	0.204929	0.248047	0.289212	0.363889	0.47808	0.518958	0.615993	0.744141	0.795121	0.938291	1.01714	1.1852	1.24023	1.40317	1.58827	1.78869	2.23242	2.67155	3.31475	4.2168	7.58878
0.028046	0.117896	0.205484	0.248047	0.291408	0.364879	0.480077	0.520153	0.616175	0.744141	0.795223	0.938324	1.01928	1.18756	1.24023	1.40317	1.58827	1.78869	2.23242	2.6721	3.3279	4.21738	7.65738
0.028307	0.11823	0.205529	0.248047	0.291522	0.365642	0.481005	0.524068	0.617081	0.744141	0.796015	0.938596	1.02272	1.19129	1.24023	1.40317	1.58827	1.78869	2.23242	2.67623	3.3279	4.21872	7.6614
0.0283591	0.118412	0.20579	0.248047	0.291541	0.366539	0.481383	0.524536	0.617238	0.744141	0.797038	0.938738	1.02272	1.1934	1.24023	1.40317	1.58827	1.78869	2.23242	2.68304	3.33713	4.22409	7.9375
0.0287373	0.118546	0.206125	0.248047	0.292313	0.366985	0.483717	0.525229	0.617984	0.744141	0.798441	0.940238	1.02272	1.19392	1.24023	1.40317	1.58827	1.78869	2.23242	2.68304	3.33713	4.22409	8.07582
0.0287959	0.118849	0.20626	0.248047	0.292383	0.367628	0.48374	0.525591	0.61865	0.744141	0.799954	0.944853	1.02272	1.19835	1.24023	1.40317	1.58827	1.78869	2.23242	2.68304	3.33713	4.22557	8.07582
0.0288695	0.118879	0.206481	0.248047	0.292457	0.368547	0.486098	0.526347	0.620402	0.744141	0.80026	0.94684	1.02272	1.20129	1.24023	1.40317	1.58827	1.79024	2.23242	2.68304	3.33713	4.24588	8.18179
0.0289748	0.118997	0.206907	0.248047	0.293017	0.370062	0.486312	0.52799	0.620571	0.744141	0.801538	0.949018	1.02272	1.20364	1.24023	1.40646	1.58827	1.79863	2.23242	2.68343	3.33713	4.26756	8.1893
0.0289748	0.119111	0.206956	0.248047	0.293295	0.372077	0.48671	0.530223	0.620659	0.744141	0.801589	0.949533	1.02272	1.20378	1.24023	1.40681	1.58827	1.80224	2.23242	2.72704	3.33713	4.26756	8.24546
0.0289974	0.119389	0.207008	0.248047	0.293977	0.373017	0.486734	0.531952	0.620914	0.744141	0.801781	0.951014	1.02272	1.20549	1.24095	1.40838	1.58827	1.80581	2.23242	2.73534	3.33713	4.26756	8.47725
0.0292958	0.119752	0.207216	0.248047	0.29503	0.373276	0.487041	0.533638	0.62157	0.744141	0.806699	0.951835	1.02272	1.20856	1.24152	1.41097	1.58827	1.80581	2.23242	2.73977	3.33713	4.26756	8.73815
0.029527	0.119828	0.207223	0.248047	0.296188	0.373414	0.48753	0.535519	0.62237	0.744141	0.807236	0.953013	1.02272	1.21047	1.24722	1.41191	1.58827	1.80581	2.23242	2.73977	3.33713	4.26756	8.98464
0.0295272	0.119831	0.20761	0.248047	0.296558	0.374843	0.488937	0.539464	0.623309	0.744141	0.807405	0.95452	1.02272	1.21276	1.2482	1.41333	1.58827	1.81488	2.23378	2.74298	3.33713	4.28195	9.14752
0.0295303	0.119877	0.207719	0.248047	0.296628	0.374876	0.48919	0.539709	0.623371	0.744141	0.809854	0.955726	1.02272	1.21567	1.25396	1.4179	1.58827	1.81718	2.24616	2.74851	3.33713	4.33195	9.20785
0.0296115	0.120169	0.207758	0.248047	0.296775	0.375388	0.491245	0.53971	0.624258	0.744141	0.810313	0.955904	1.02272	1.22269	1.25401	1.41913	1.58827	1.82478	2.24616	2.76395	3.33713	4.33195	9.35041
0.0297886	0.12023	0.207995	0.248047	0.296881	0.375454	0.491592	0.540854	0.624675	0.744141	0.811148	0.956819	1.02272	1.22481	1.25717	1.42682	1.58827	1.82915	2.24616	2.7684	3.33713	4.33643	9.52965
0.0308659	0.120501	0.208003	0.248047	0.296929	0.376208	0.493498	0.543212	0.627882	0.744141	0.816624	0.960432	1.02272	1.22649	1.25982	1.42734	1.58827	1.8356	2.24616	2.77106	3.33713	4.3846	9.67383
0.0310059	0.120808	0.20819	0.248047	0.297237	0.376859	0.493818	0.543841	0.628	0.744141	0.816898	0.960883	1.02272	1.23581	1.2612	1.42762	1.58827	1.83718	2.26863	2.77325	3.33713	4.3954	9.81275
0.0310081	0.12082	0.208352	0.248047	0.297438	0.376939	0.494354	0.544002	0.630413	0.744141	0.820699	0.961447	1.02272	1.23888	1.26248	1.42813	1.58827	1.8372	2.28231	2.77325	3.33713	4.41635	9.82842
0.0314465	0.120875	0.208695	0.248047	0.297802	0.37727	0.495023	0.545331	0.630628	0.744141	0.821638	0.962024	1.02272	1.24023	1.26347	1.43409	1.58827	1.84268	2.2834	2.77325	3.33713	4.41635	9.82842
0.0321281	0.121047	0.208948	0.248047	0.298103	0.377288	0.495199	0.545607	0.631057	0.744141	0.82217	0.964753	1.0235	1.24023	1.26453	1.43442	1.58827	1.84435	2.28688	2.77325	3.34776	4.45392	10.0451
0.0322823	0.121108	0.208991	0.248047	0.298109	0.37814	0.495492	0.546034	0.631293	0.744141	0.822829	0.965486	1.02721	1.24023	1.2648	1.43506	1.58827	1.8514	2.28688	2.77325	3.35997	4.47173	10.0727
0.0323414	0.121127	0.208994	0.248047	0.298136	0.378704	0.495832	0.546152	0.631563	0.744141	0.824099	0.966088	1.02916	1.24023	1.2648	1.4371	1.58827	1.85996	2.28688	2.77325	3.3738	4.47173	10.1214
0.032397	0.121407	0.209082	0.248047	0.299861	0.379414	0.496002	0.546206	0.633602	0.744141	0.824511	0.966603	1.02958	1.24023	1.2648	1.4389	1.58827	1.86417	2.28688	2.77325	3.3738	4.47173	10.1699
0.0324785	0.121419	0.209249	0.248047	0.29988	0.379741	0.496094	0.546248	0.634298	0.744141	0.824831	0.966711	1.03109	1.24023	1.2648	1.44453	1.58827	1.88187	2.28688	2.77325	3.3738	4.57376	10.2062
0.0326125	0.121467	0.209919	0.248047	0.299918	0.380518	0.496094	0.546704	0.634433	0.744141	0.824876	0.968122	1.03559	1.24023	1.2648	1.4461	1.58827	1.8858	2.28688	2.77325	3.3738	4.61394	10.2152
0.0326691	0.121672	0.210643	0.248047	0.300071	0.380888	0.496094	0.546822	0.636887	0.744141	0.825298	0.969869	1.03716	1.24023	1.2648	1.44635	1.59226	1.88656	2.28688	2.77325	3.3738	4.61416	10.2902
0.0327243	0.121917	0.210921	0.248047	0.300304	0.3812	0.496094	0.548076	0.637206	0.744141	0.825351	0.970153	1.04002	1.24023	1.2648	1.44635	1.59441	1.88907	2.28688	2.77325	3.37909	4.64017	10.3884
0.0327596	0.122482	0.21103	0.248047	0.300973	0.381645	0.496094	0.548204	0.637324	0.744141	0.834263	0.972309	1.04192	1.24023	1.2648	1.44635	1.59588	1.88907	2.28963	2.77325	3.38894	4.65154	10.5529
0.0327633	0.122723	0.211336	0.248047	0.30129	0.381864	0.496094	0.548548	0.638985	0.744141	0.834332	0.97565	1.04301	1.24023	1.2648	1.44635	1.59649	1.88907	2.29202	2.77955	3.3955	4.66038	10.6053
0.0329006	0.12288	0.21142	0.248047	0.30131	0.38202	0.496094	0.549353	0.639301	0.744141	0.834741	0.975841	1.04428	1.24023	1.2648	1.44635	1.5978	1.89385	2.30931	2.80463	3.42365	4.66727	10.6053
0.0330817	0.122963	0.211473	0.248047	0.301314	0.382383	0.496094	0.550025	0.643568	0.744141	0.835756	0.977619	1.04497	1.24023	1.2648	1.44635	1.60055	1.92893	2.33196	2.80633	3.42966	4.68014	10.6053
0.0331143	0.123096	0.211834	0.248047	0.302066	0.38263	0.496094	0.550317	0.645635	0.744141	0.840946	0.977744	1.04509	1.24023	1.2648	1.44635	1.60065	1.93731	2.34007	2.80633	3.43488	4.70636	10.6545
0.0334461	0.123156	0.211995	0.248047	0.302262	0.384152	0.496094	0.550357	0.645713	0.744141	0.843488	0.981636	1.04626	1.24023	1.2648	1.44635	1.61074	1.93731	2.34007	2.80633	3.44598	4.71941	10.8064
0.0337291	0.123375	0.212039	0.248047	0.302318	0.384157	0.496094	0.55232	0.646228	0.744141	0.844711	0.982207	1.04815	1.24023	1.2648	1.44635	1.61364	1.93731	2.34007	2.80633	3.44598	4.71986	10.8912
0.0339906	0.123413	0.212085	0.248047	0.303576	0.384622	0.496094	0.553184	0.649083	0.744141	0.846915	0.986861	1.04857	1.24023	1.2648	1.44635	1.62121	1.93731	2.34007	2.80633	3.45489	4.73893	10.8971
0.0343518	0.123863	0.212113	0.248047	0.303708	0.384889	0.496094	0.554476	0.651894	0.744141	0.848591	0.991613	1.05126	1.24023	1.2648	1.44635	1.62553	1.93731	2.34007	2.80959	3.45489	4.8162	10.9506
0.0344178	0.124409	0.212834	0.248047	0.304183	0.385009	0.496094	0.55465	0.652547	0.744141	0.849017	0.992188	1.05237	1.24023	1.2648	1.44635	1.62742	1.93731	2.34007	2.81181	3.45489	4.82664	10.9815
0.0345743	0.124493	0.213436	0.248047	0.30435	0.385339	0.496094	0.55465	0.654561	0.744141	0.849589	0.992188	1.05237	1.24023	1.2648	1.44635	1.63252	1.93731	2.34007	2.82817	3.47266	4.83794	11.0151
0.0348574	0.125005	0.2139	0.248047	0.305378	0.385493	0.496094	0.55465	0.655002	0.744141	0.850134	0.992188	1.05237	1.24023	1.2648	1.44635	1.63925	1.93731	2.34007	2.82817	3.4815	4.84806	11.0513
0.0353521	0.125102	0.213937	0.248047	0.305493	0.3857	0.496094	0.55465	0.655688	0.744141	0.852996	0.992188	1.05237	1.24023	1.2648	1.44635	1.6414	1.93731	2.34007	2.82817	3.4815	4.86124	11.093
0.0356101	0.125292	0.214249	0.248047	0.306512	0.387495	0.496094	0.55465	0.655787	0.744141	0.853302	0.992188	1.05237	1.24023	1.2648	1.44635	1.64322	1.93731	2.34007	2.82817	3.49946	4.86847	11.1091
0.0356157	0.125317	0.214452	0.248047	0.3067	0.387859	0.496094	0.55465	0.657005	0.744141	0.854616	0.992188	1.05237	1.24023	1.2648	1.44635	1.64333	1.93731	2.34007	2.82817	3.50791	4.87335	11.14
0.0359561	0.125358	0.214535	0.248047	0.307026	0.388126	0.496094	0.55465	0.659277	0.744141	0.854977	0.992188	1.05237	1.24023	1.2648	1.44635	1.64862	1.93731	2.34753	2.82817	3.50791	4.87335	11.1428
0.0361332	0.125406	0.214548	0.248047	0.307839	0.389896	0.496094	0.55465	0.659947	0.744141	0.856246	0.992188	1.05237	1.24023	1.2648	1.44635	1.65086	1.94078	2.35318	2.82817	3.50791	4.87335	11.2609
0.0361387	0.125603	0.214579	0.248047	0.307928	0.390093	0.496094	0.55465	0.660065	0.744141	0.856915	0.992188	1.05237	1.24023	1.26678	1.44635	1.65199	1.95269	2.35318	2.8584	3.50791	4.87335	11.3236
0.0363073	0.125612	0.214881	0.248047	0.309246	0.390236	0.496094	0.55465	0.66029	0.744141	0.857313	0.992188	1.05237	1.24023	1.27155	1.44635	1.65644	1.96456	2.35318	2.8626	3.50791	4.87335	11.4774
0.0363243	0.126485	0.215005	0.248047	0.309311	0.390244	0.496094	0.55465	0.663588	0.744141	0.858452	0.992188	1.05625	1.24023	1.27564	1.44635	1.66138	1.96702	2.36705	2.86723	3.50791	4.87969	11.5974
0.036539	0.12697	0.215336	0.248047	0.309881	0.390257	0.496094	0.55465	0.665445	0.744141	0.858589	0.992188	1.05681	1.24023	1.28281	1.44635	1.66395	1.97681	2.36876	2.86889	3.50791	4.88596	11.6265
0.0367118	0.127023	0.215704	0.248047	0.310488	0.390279	0.496094	0.55465	0.665669	0.744141	0.858785	0.992188	1.05716	1.24023	1.28502	1.44893	1.66395	1.97898	2.4001	2.86981	3.50791	4.89225	11.724
0.0367831	0.127043	0.216	0.248047	0.310582	0.390548	0.496094	0.55465	0.666666	0.744141	0.859085	0.992188	1.05859	1.24023	1.28648	1.45335	1.66395	1.97898	2.4038	2.8927	3.50791	4.9159	11.7254
0.0368823	0.127533	0.216282	0.248047	0.310973	0.390624	0.496094	0.55465	0.667163	0.744141	0.862946	0.992188	1.05882	1.24023	1.29197	1.4542	1.66395	1.98438	2.40863	2.89999	3.52541	4.92151	11.7528
0.037093	0.127597	0.216648	0.248047	0.31115	0.391172	0.496094	0.55465	0.667851	0.744141	0.864733	0.992188	1.05921	1.24023	1.29667	1.46274	1.66395	1.98438	2.43053	2.90331	3.52541	4.93027	11.7868
0.037207	0.12825	0.217022	0.248047	0.311673	0.392011	0.496094	0.55465	0.668373	0.744141	0.867172	0.992188	1.06388	1.24023	1.29732	1.4684	1.66519	1.98438	2.43132	2.90331	3.52541	4.96094	11.8259
0.0375215	0.128291	0.217053	0.248047	0.312094	0.392172	0.496094	0.55465	0.66919	0.744141	0.867422	0.992188	1.06422	1.24023	1.2998	1.47181	1.6752	1.98438	2.43289	2.91071	3.55149	4.96659	12.1239
0.0375363	0.128351	0.217195	0.248047	0.312252	0.392238	0.496094	0.55465	0.671461	0.744141	0.873132	0.992188	1.06479	1.24023	1.30343	1.47351	1.67541	1.98438	2.44298	2.91563	3.55149	4.97003	12.1619
0.0376028	0.128431	0.217503	0.248047	0.3132	0.392566	0.496094	0.55465	0.672333	0.744141	0.875398	0.992188	1.06622	1.24023	1.30894	1.47797	1.68222	1.98438	2.45554	2.91705	3.55149	4.97395	12.4123
0.0377254	0.128715	0.218375	0.248047	0.313365	0.392645	0.496094	0.55465	0.6728	0.744141	0.876083	0.992188	1.06627	1.24023	1.31216	1.48828	1.68236	1.98438	2.45554	2.94144	3.55211	4.99185	12.4913
0.0379611	0.128783	0.218569	0.248047	0.313464	0.392931	0.496094	0.55465	0.675531	0.744141	0.87709	0.992188	1.06662	1.24023	1.31521	1.48828	1.69026	1.98438	2.45554	2.94355	3.57738	4.99887	12.648
0.0381847	0.128803	0.218683	0.248047	0.313563	0.393361	0.496094	0.55465	0.678026	0.744141	0.877407	0.992188	1.07146	1.24023	1.3166	1.48828	1.69119	1.98438	2.45554	2.9471	3.57738	5.01644	12.6892
0.0387114	0.129062	0.218767	0.248047	0.313822	0.395348	0.496094	0.55465	0.67852	0.744141	0.877702	0.992188	1.07167	1.24023	1.32207	1.48828	1.69465	1.98438	2.45554	2.95678	3.57962	5.01809	12.711
0.0387178	0.129208	0.218908	0.248047	0.313946	0.395611	0.496094	0.55465	0.680068	0.744141	0.878155	0.992188	1.07593	1.24023	1.32305	1.48828	1.69549	1.98438	2.46579	2.96354	3.60259	5.02257	12.711
0.038772	0.129236	0.21976	0.248047	0.314075	0.397138	0.496094	0.55465	0.680406	0.744141	0.878841	0.992188	1.07605	1.24023	1.32465	1.48828	1.70031	1.98438	2.48047	2.9748	3.60645	5.02257	12.8051
0.0393113	0.129237	0.220253	0.248047	0.31459	0.397264	0.496094	0.55465	0.680766	0.744141	0.879328	0.992188	1.07758	1.24023	1.32676	1.48828	1.70555	1.98761	2.48047	2.97656	3.61007	5.05918	12.8701
0.0393829	0.129487	0.220545	0.248047	0.315104	0.397458	0.496094	0.55465	0.681848	0.744141	0.879348	0.992188	1.08031	1.24023	1.32719	1.48828	1.70622	1.99163	2.48047	2.98602	3.61153	5.07635	12.9413
0.0394162	0.129559	0.221075	0.248047	0.315727	0.397841	0.496094	0.55465	0.682404	0.744141	0.879397	0.992188	1.08183	1.24023	1.33055	1.48828	1.71134	1.99476	2.48047	2.98688	3.6325	5.10488	13.0219
0.0394449	0.129597	0.22116	0.248047	0.316083	0.398186	0.496094	0.55465	0.682529	0.745302	0.879615	0.992188	1.08308	1.24023	1.33218	1.48828	1.71598	1.99616	2.48047	2.98688	3.6466	5.10842	13.036
0.0395915	0.129603	0.222047	0.248047	0.316457	0.400244	0.496094	0.55465	0.682736	0.745824	0.881909	0.992188	1.08494	1.24023	1.33307	1.48828	1.71883	1.99982	2.48047	2.98688	3.66938	5.11362	13.0502
0.039776	0.129755	0.22247	0.248047	0.316988	0.400551	0.496094	0.55465	0.684034	0.747513	0.881995	0.992188	1.08607	1.24023	1.33577	1.48828	1.71925	1.99982	2.48047	2.98688	3.68444	5.11362	13.0502
0.0397976	0.129789	0.222563	0.248047	0.31752	0.401237	0.496094	0.55465	0.685686	0.747575	0.883013	0.992188	1.08987	1.24023	1.33577	1.48828	1.72153	1.99982	2.48047	2.98688	3.68748	5.11362	13.1184
0.0401196	0.130068	0.222974	0.248047	0.318092	0.401622	0.496094	0.55465	0.68611	0.748004	0.883748	0.992188	1.09221	1.24023	1.33577	1.48828	1.72759	1.99982	2.48047	2.98688	3.68748	5.11362	13.1348
0.0401622	0.130099	0.223503	0.248047	0.318168	0.401674	0.496094	0.55465	0.686808	0.748367	0.884975	0.992188	1.09455	1.24023	1.33577	1.48828	1.73623	1.99982	2.48047	2.98688	3.68748	5.13638	13.1488
0.0402333	0.130357	0.22378	0.248047	0.318972	0.401931	0.496094	0.55465	0.687398	0.749852	0.885487	0.992188	1.10191	1.24023	1.33577	1.48828	1.73633	1.99982	2.48047	2.98688	3.68748	5.16356	13.1839
0.0402694	0.130436	0.2262	0.248047	0.319004	0.40313	0.496094	0.55465	0.688896	0.749905	0.887121	0.992188	1.10488	1.24023	1.33577	1.48828	1.73633	1.99982	2.48047	2.98688	3.68748	5.17334	13.2374
0.0403547	0.130537	0.226464	0.248047	0.319291	0.404659	0.496094	0.55465	0.689028	0.752362	0.887475	0.992188	1.1093	1.24023	1.33577	1.48828	1.73633	2.00186	2.48047	2.99716	3.68748	5.17937	13.2954
0.0403555	0.130639	0.226761	0.248047	0.320409	0.404999	0.496094	0.55465	0.690717	0.754146	0.88764	0.992188	1.1093	1.24023	1.33577	1.48828	1.73633	2.02934	2.48047	2.99716	3.68748	5.22278	13.4037
0.0405701	0.130913	0.22678	0.248047	0.320441	0.405215	0.496094	0.55465	0.692451	0.754159	0.888816	0.992188	1.1093	1.24023	1.33577	1.48828	1.73633	2.04545	2.48047	2.99716	3.68748	5.22443	13.7213
0.0407903	0.131003	0.227035	0.248047	0.320962	0.405624	0.496094	0.55465	0.692677	0.756568	0.891595	0.992188	1.1093	1.24023	1.33577	1.48828	1.73633	2.04545	2.48047	2.9996	3.68748	5.23255	14.3375
0.0408339	0.131219	0.227368	0.248047	0.321058	0.405733	0.496094	0.55465	0.692708	0.756837	0.891734	0.992188	1.1093	1.24023	1.33577	1.48828	1.73633	2.04545	2.48047	3.00261	3.68748	5.23255	14.3546
0.0408687	0.131443	0.227435	0.248047	0.322012	0.406919	0.496094	0.55465	0.693245	0.758656	0.894305	0.992188	1.1093	1.24023	1.33577	1.48828	1.73633	2.05103	2.48047	3.01762	3.68778	5.26187	14.7437
0.0409121	0.131585	0.227663	0.248047	0.323121	0.407289	0.496094	0.55465	0.694886	0.759798	0.894346	0.992188	1.1093	1.24023	1.33577	1.48828	1.73633	2.05186	2.48047	3.01762	3.68779	5.28213	14.9826
0.0411982	0.13182	0.227693	0.248047	0.324	0.40841	0.496094	0.55465	0.69503	0.760264	0.894346	0.992188	1.1093	1.24023	1.33577	1.49018	1.73633	2.05628	2.48047	3.02184	3.69059	5.2941	15.4209
0.0412402	0.131968	0.228538	0.248047	0.324271	0.408536	0.496094	0.55465	0.695181	0.763471	0.894346	0.992188	1.1093	1.24023	1.33577	1.49174	1.73633	2.05725	2.48047	3.0278	3.7207	5.30843	15.7895
0.0413	0.132024	0.229038	0.248047	0.324917	0.408578	0.496094	0.55465	0.69537	0.766661	0.894346	0.992188	1.1093	1.24023	1.33577	1.4918	1.73633	2.05852	2.48047	3.0278	3.73285	5.30971	16.0676
0.041377	0.133033	0.229584	0.248047	0.325096	0.409296	0.496094	0.55465	0.696363	0.768949	0.894346	0.992188	1.1093	1.24023	1.33577	1.49496	1.73633	2.07495	2.48047	3.0278	3.74787	5.34309	16.094
0.041422	0.133122	0.230266	0.248047	0.326904	0.410253	0.496094	0.55465	0.697196	0.771351	0.894346	0.992188	1.1093	1.24023	1.33577	1.4961	1.73633	2.08079	2.48047	3.0278	3.75285	5.35414	16.7372
0.0414708	0.133532	0.230672	0.248047	0.327889	0.411386	0.496094	0.55465	0.697311	0.771858	0.894346	0.992188	1.1093	1.24023	1.33577	1.49823	1.73633	2.08223	2.49284	3.0278	3.75935	5.37448	16.9273
0.0415362	0.133565	0.230897	0.248047	0.328414	0.411443	0.496094	0.55465	0.697529	0.773162	0.894346	0.992188	1.1093	1.24023	1.33577	1.49896	1.73728	2.10251	2.49284	3.0278	3.76785	5.37826	16.9327
0.0417267	0.134041	0.232546	0.248047	0.328937	0.412264	0.496094	0.55465	0.698098	0.773228	0.894346	0.992188	1.1093	1.24023	1.33577	1.4991	1.73858	2.10368	2.49284	3.0278	3.77814	5.39377	18.4174
0.0419943	0.134281	0.233096	0.248047	0.33024	0.413123	0.496094	0.55465	0.698228	0.775121	0.894346	0.992188	1.1093	1.24023	1.33577	1.50053	1.74092	2.10475	2.49284	3.0278	3.77997	5.39618	20.3942
0.0422673	0.134517	0.233183	0.248047	0.331338	0.413241	0.496094	0.55465	0.698292	0.775888	0.894346	0.992188	1.1093	1.24023	1.33577	1.50854	1.74196	2.10475	2.49284	3.0278	3.78627	5.43268
0.0422673	0.134835	0.233183	0.248047	0.332146	0.413738	0.496094	0.55465	0.698448	0.777069	0.894346	0.992188	1.1093	1.24023	1.33577	1.50881	1.74833	2.10475	2.49291	3.0278	3.79356	5.44009
0.0425576	0.134856	0.23342	0.248047	0.332524	0.414496	0.496094	0.55465	0.698934	0.777308	0.894346	0.992188	1.1093	1.24023	1.33626	1.50881	1.75201	2.10729	2.49895	3.0278	3.79439	5.46267
0.0427564	0.135017	0.23382	0.248047	0.332787	0.414577	0.496094	0.55465	0.700053	0.778795	0.894346	0.992188	1.1093	1.24023	1.3412	1.50881	1.75261	2.11251	2.50375	3.0278	3.79843	5.46267
0.04284	0.135142	0.233843	0.248047	0.332935	0.414806	0.496094	0.55465	0.700321	0.779935	0.894346	0.992188	1.1093	1.24023	1.34411	1.50908	1.75396	2.11818	2.51721	3.03537	3.8046	5.46523
0.0428483	0.135206	0.233861	0.248047	0.333539	0.415032	0.496094	0.55465	0.700551	0.780068	0.894346	0.992188	1.10959	1.24023	1.35464	1.51148	1.75396	2.11931	2.52057	3.03921	3.80826	5.47721
0.0430388	0.13532	0.233938	0.248047	0.334164	0.415137	0.496094	0.55465	0.701583	0.780142	0.894346	0.992188	1.10996	1.24023	1.35779	1.51272	1.75396	2.11931	2.52959	3.03942	3.81908	5.47782
0.0430397	0.135609	0.234013	0.248047	0.334187	0.415168	0.496094	0.55465	0.701583	0.780603	0.894346	0.992188	1.11343	1.24023	1.35951	1.51958	1.75396	2.11931	2.52959	3.06035	3.82581	5.51585
0.0430776	0.135646	0.234298	0.248047	0.334287	0.415336	0.496094	0.55465	0.701583	0.781604	0.894346	0.992188	1.11359	1.24023	1.36135	1.53009	1.75396	2.11931	2.52959	3.06482	3.82797	5.51748
0.0431197	0.135889	0.23454	0.248047	0.334869	0.416485	0.496094	0.55465	0.701583	0.782162	0.894346	0.992188	1.11411	1.24023	1.36571	1.53569	1.75396	2.11931	2.5538	3.06602	3.8587	5.53181
0.0432002	0.135988	0.234927	0.248047	0.335184	0.416908	0.496094	0.55465	0.701583	0.78228	0.894346	0.992188	1.12135	1.24023	1.36808	1.53758	1.75396	2.13185	2.5538	3.06677	3.8587	5.57416
0.0432275	0.136251	0.235215	0.248047	0.335395	0.417017	0.496094	0.55465	0.701583	0.783932	0.894346	0.992188	1.12668	1.24023	1.37213	1.54121	1.75396	2.13378	2.5538	3.06817	3.8587	5.58519
0.0434896	0.136546	0.235521	0.248047	0.336172	0.41755	0.496094	0.55465	0.701583	0.784334	0.894346	0.992188	1.12983	1.24023	1.37712	1.54476	1.75396	2.13378	2.5538	3.06817	3.86045	5.59374
0.0435366	0.136923	0.235574	0.248047	0.337545	0.418299	0.496094	0.55465	0.701583	0.784393	0.894346	0.993005	1.13466	1.24023	1.37721	1.54543	1.75396	2.13378	2.5538	3.07029	3.86093	5.65634
0.0436115	0.137084	0.236096	0.248047	0.337727	0.418776	0.496094	0.5554	0.701583	0.784393	0.894346	0.994457	1.13578	1.24023	1.38143	1.55073	1.75396	2.13378	2.5538	3.07072	3.867	5.66721
0.0436749	0.137449	0.236335	0.248047	0.33778	0.419307	0.496094	0.555986	0.701583	0.784393	0.894346	0.999077	1.14055	1.24023	1.39147	1.55099	1.75396	2.13378	2.5538	3.08452	3.87299	5.71047
0.0436767	0.137755	0.236956	0.248047	0.337859	0.422239	0.496094	0.556091	0.701583	0.784393	0.894346	0.999476	1.14154	1.24023	1.39442	1.55595	1.75396	2.13378	2.5538	3.10802	3.87462	5.79071
0.0437107	0.137828	0.23728	0.248047	0.338506	0.422364	0.496094	0.556306	0.701583	0.784393	0.894346	0.999999	1.14158	1.24023	1.39746	1.55835	1.75396	2.13378	2.5538	3.10802	3.87462	5.79071
0.0438996	0.137953	0.237333	0.248047	0.340323	0.422781	0.496094	0.55842	0.701583	0.784393	0.897853	1.0005	1.144	1.24023	1.40184	1.55862	1.75396	2.13378	2.5538	3.11028	3.87462	5.79071
0.0439192	0.138043	0.239019	0.248047	0.340575	0.423335	0.496094	0.559584	0.701583	0.784393	0.899441	1.00088	1.15393	1.24023	1.40317	1.55957	1.75396	2.13378	2.55535	3.11464	3.87462	5.80663
0.0442887	0.138223	0.239103	0.248047	0.340586	0.423721	0.496094	0.56055	0.701583	0.784393	0.902756	1.00166	1.15514	1.24023	1.40317	1.56409	1.75396	2.13378	2.56161	3.11508	3.87462	5.97376
0.0443576	0.13829	0.239236	0.248047	0.340758	0.423823	0.496094	0.560968	0.701583	0.784393	0.905248	1.00244	1.15648	1.24023	1.40317	1.56879	1.75396	2.13378	2.56543	3.11913	3.87462	5.97376
0.0446491	0.139031	0.239771	0.248047	0.341354	0.424526	0.496094	0.562777	0.701583	0.784393	0.906346	1.01044	1.15674	1.24023	1.40317	1.56879	1.75396	2.13378	2.57152	3.12162	3.87771	6.00458
0.0446608	0.139042	0.239949	0.248047	0.341797	0.424695	0.496094	0.563098	0.701583	0.784393	0.90833	1.01402	1.16089	1.24023	1.40317	1.56879	1.75396	2.13378	2.58007	3.13317	3.88532	6.08094
0.0447891	0.139179	0.240074	0.248047	0.341922	0.425469	0.496094	0.563279	0.701583	0.784393	0.909093	1.01446	1.16557	1.24023	1.40317	1.56879	1.75396	2.13378	2.58951	3.13757	3.90016	6.12631
0.0448713	0.139527	0.240411	0.248047	0.343348	0.425954	0.496094	0.564905	0.702047	0.784393	0.910478	1.01498	1.16697	1.24023	1.40317	1.576	1.75396	2.14024	2.58969	3.13757	3.90476	6.20117
0.0451133	0.140564	0.240452	0.248047	0.343664	0.426423	0.496094	0.565408	0.703215	0.784393	0.910792	1.01528	1.16903	1.24023	1.40317	1.57739	1.75396	2.15486	2.58969	3.13757	3.92197	6.20117
0.0451924	0.140805	0.24074	0.248047	0.344351	0.426554	0.496094	0.565649	0.703264	0.784393	0.911217	1.01649	1.1709	1.24023	1.40317	1.5775	1.75396	2.16665	2.58969	3.14027	3.92197	6.20117
0.0452198	0.140956	0.240814	0.248047	0.344461	0.426777	0.496094	0.566533	0.703855	0.784393	0.912273	1.01738	1.17338	1.24023	1.40317	1.58114	1.75396	2.17146	2.58969	3.14519	3.92197	6.20117
0.0455652	0.141015	0.240978	0.248047	0.344785	0.427237	0.496094	0.567289	0.704131	0.784393	0.913813	1.01856	1.17689	1.24023	1.40317	1.58558	1.75396	2.17226	2.58969	3.14857	3.92197	6.20117
0.0456071	0.141017	0.241609	0.248047	0.34502	0.428484	0.496094	0.568174	0.704185	0.784393	0.91535	1.01904	1.17779	1.24023	1.40317	1.58827	1.75396	2.18146	2.58969	3.15712	3.92197	6.21604
0.0458459	0.141198	0.242006	0.248047	0.345212	0.428653	0.496094	0.569209	0.70555	0.784393	0.916022	1.02049	1.17822	1.24023	1.40317	1.58827	1.75396	2.18368	2.59348	3.15712	3.92314	6.21604
0.0458795	0.14157	0.24213	0.248047	0.345669	0.428883	0.496094	0.570144	0.706228	0.784393	0.917883	1.02272	1.17982	1.24023	1.40317	1.58827	1.75396	2.19809	2.59894	3.15712	3.95446	6.27514
0.0458821	0.141634	0.242287	0.248047	0.345796	0.429934	0.496094	0.57195	0.706307	0.784393	0.918214	1.02272	1.18201	1.24023	1.40317	1.58827	1.75396	2.20208	2.63677	3.15712	3.9599	6.32398
0.0459941	0.141636	0.242489	0.248047	0.345996	0.433062	0.496094	0.572795	0.706661	0.784393	0.918381	1.02272	1.18257	1.24023	1.40317	1.58827	1.75396	2.20604	2.63677	3.16478	3.97649	6.32398
0.0462581	0.141889	0.242613	0.248047	0.346828	0.43317	0.496094	0.572886	0.707534	0.784393	0.918807	1.02272	1.18369	1.24023	1.40545	1.58827	1.75396	2.21175	2.63677	3.17655	3.99964	6.33856
0.046339	0.141909	0.242868	0.248047	0.34739	0.43352	0.496094	0.572948	0.707837	0.784393	0.920663	1.02272	1.18659	1.24023	1.41577	1.58827	1.75396	2.21566	2.63677	3.17655	3.99964	6.33856
0.0466552	0.142189	0.242896	0.248047	0.347463	0.43381	0.496094	0.573434	0.709289	0.784393	0.922687	1.02272	1.18756	1.24023	1.41636	1.58827	1.75396	2.2186	2.63927	3.17655	3.99964	6.40134
0.0466872	0.142359	0.242896	0.248047	0.3477	0.43412	0.496094	0.57351	0.710448	0.784393	0.924428	1.02272	1.1888	1.24023	1.41662	1.58827	1.75396	2.2186	2.65119	3.17655	4.00732	6.40134
0.0466977	0.142486	0.243417	0.248047	0.347915	0.434684	0.496094	0.57379	0.71152	0.784393	0.924478	1.02272	1.19122	1.24023	1.42388	1.58827	1.75396	2.2186	2.66086	3.17655	4.02047	6.43489
0.0468712	0.1428	0.244034	0.248047	0.348059	0.437485	0.496094	0.574003	0.71515	0.784393	0.926003	1.02272	1.19215	1.24023	1.4268	1.58827	1.75396	2.23242	2.66422	3.17655	4.02745	6.45399
0.0472267	0.143124	0.24419	0.248047	0.348299	0.437811	0.496094	0.574349	0.715834	0.784393	0.926453	1.02272	1.19392	1.24023	1.42881	1.58827	1.75396	2.23242	2.66648	3.18467	4.03791	6.49201
0.0473568	0.143317	0.244306	0.248047	0.350001	0.438248	0.496094	0.57519	0.7193	0.784393	0.929403	1.02272	1.19432	1.24023	1.43176	1.58827	1.75396	2.23242	2.6697	3.18697	4.06655	6.51094
0.0474024	0.143599	0.245323	0.248047	0.350144	0.438729	0.496094	0.576845	0.719878	0.784393	0.93042	1.02272	1.19542	1.24023	1.43201	1.58827	1.75396	2.23242	2.67155	3.19151	4.06827	6.54863
0.0474063	0.1436	0.245517	0.248047	0.350374	0.440415	0.496094	0.577155	0.721048	0.784393	0.930632	1.02272	1.20258	1.24023	1.43335	1.58827	1.75396	2.23242	2.67155	3.21003	4.06827	6.54863
0.0475296	0.144221	0.245595	0.248047	0.350467	0.440804	0.496094	0.577667	0.723427	0.784393	0.931806	1.02272	1.20327	1.24188	1.43423	1.58827	1.75396	2.23242	2.67155	3.22166	4.06827	6.54863
0.0475398	0.144482	0.245713	0.248047	0.350791	0.441186	0.496094	0.577844	0.72518	0.784396	0.931856	1.02272	1.20757	1.24958	1.43762	1.58827	1.75886	2.23242	2.67155	3.22185	4.06827	6.61872
0.0475476	0.14474	0.246265	0.248047	0.350791	0.441302	0.496094	0.578161	0.730394	0.78674	0.931872	1.02272	1.21037	1.25396	1.44384	1.58827	1.76809	2.23242	2.67155	3.22461	4.06827	6.69727
0.0476549	0.144776	0.246568	0.248047	0.350791	0.442178	0.496094	0.57841	0.731171	0.787486	0.932136	1.02272	1.21235	1.25552	1.44433	1.58827	1.77821	2.23242	2.67155	3.22461	4.06827	6.84268
0.0476566	0.144808	0.247563	0.248047	0.350791	0.442995	0.496094	0.580347	0.731277	0.78796	0.932214	1.02272	1.2165	1.25741	1.44635	1.58827	1.77964	2.23242	2.67204	3.22461	4.06827	6.86064
0.0477128	0.144868	0.247675	0.248047	0.350791	0.444549	0.496094	0.580504	0.731749	0.788223	0.932476	1.02272	1.2177	1.26135	1.44635	1.58827	1.78588	2.23242	2.67611	3.22461	4.08108	6.94531
0.0480421	0.144988	0.248047	0.248047	0.350791	0.444567	0.496094	0.583189	0.732008	0.789997	0.932765	1.02272	1.2185	1.2626	1.44635	1.58827	1.78869	2.23242	2.68304	3.22461	4.09089	6.94974
0.0481762	0.145125	0.248047	0.248047	0.350791	0.444798	0.496094	0.583572	0.732324	0.793063	0.936968	1.02272	1.22327	1.26265	1.44635	1.58827	1.78869	2.23242	2.68304	3.23081	4.10591	6.96301
0.0485593	0.145256	0.248047	0.248047	0.350791	0.445017	0.496094	0.584887	0.732419	0.79336	0.937598	1.02272	1.22508	1.26292	1.44635	1.58827	1.78869	2.23242	2.68304	3.23414	4.12762	7.10298
0.0487879	0.145596	0.248047	0.248047	0.350791	0.447303	0.496094	0.585196	0.732652	0.793414	0.937839	1.02272	1.23181	1.2648	1.44635	1.58827	1.78869	2.23242	2.69568	3.23414	4.12832	7.43313
0.048993	0.145671	0.248047	0.248047	0.350791	0.449756	0.496094	0.585545	0.732753	0.795303	0.939152	1.02272	1.23252	1.2648	1.44635	1.58827	1.78869	2.23435	2.70276	3.23414	4.1421	7.44141
0.0492448	0.145771	0.248047	0.248047	0.350791	0.450132	0.496094	0.586213	0.733338	0.796681	0.942173	1.02272	1.23378	1.2648	1.44635	1.58827	1.78869	2.23776	2.71459	3.23414	4.15802	7.50726
0.0492554	0.145954	0.248047	0.248047	0.350791	0.452373	0.496094	0.586531	0.73359	0.799954	0.943111	1.02272	1.23621	1.2648	1.44635	1.58827	1.78869	2.24616	2.72082	3.23414	4.15802	7.56035
0.0494393	0.14604	0.248047	0.248047	0.350791	0.453087	0.496094	0.58677	0.734723	0.800808	0.946538	1.02272	1.24023	1.2648	1.44635	1.58827	1.79168	2.24616	2.72648	3.24005	4.15878	7.70544
0.0495922	0.146145	0.248047	0.248047	0.350791	0.453166	0.496094	0.587737	0.73489	0.803961	0.948103	1.02272	1.24023	1.2648	1.44635	1.58827	1.798	2.24616	2.72852	3.25072	4.16099	7.78883
0.0496258	0.14644	0.248047	0.248047	0.350791	0.45458	0.496094	0.589838	0.736387	0.804971	0.948154	1.02272	1.24023	1.2648	1.44635	1.58827	1.79881	2.24616	2.73977	3.25858	4.20273	7.88305
0.0498645	0.147187	0.248047	0.248047	0.350791	0.454979	0.496094	0.59107	0.738011	0.805302	0.949747	1.02272	1.24023	1.2648	1.44635	1.58827	1.80581	2.24616	2.73977	3.26255	4.22409	7.89475
0.0500774	0.147948	0.248047	0.248047	0.350791	0.455139	0.496094	0.591405	0.738249	0.805607	0.951499	1.02635	1.24023	1.2648	1.44635	1.58827	1.81375	2.24616	2.73977	3.26255	4.23863	7.98773
0.0501805	0.147965	0.248047	0.248047	0.350791	0.456532	0.496094	0.591529	0.738591	0.807403	0.952842	1.02721	1.24023	1.2648	1.44635	1.58827	1.8219	2.25552	2.73977	3.30936	4.26756	8.07582
0.0501989	0.14853	0.248047	0.248047	0.350791	0.456575	0.496094	0.591843	0.742909	0.808077	0.953185	1.03116	1.24023	1.2648	1.44635	1.58827	1.82968	2.26905	2.73977	3.30936	4.26756	8.1893
0.0506016	0.148634	0.248047	0.248047	0.350791	0.456881	0.496094	0.591868	0.742937	0.808269	0.955061	1.03147	1.24023	1.2648	1.44635	1.59516	1.83485	2.28688	2.74231	3.30936	4.26756	8.24546
0.050672	0.14887	0.248047	0.248746	0.350791	0.457053	0.496094	0.591958	0.744141	0.808511	0.955783	1.03267	1.24023	1.2648	1.44635	1.5964	1.83801	2.28688	2.75349	3.30947	4.26756	8.44817
0.0508442	0.148939	0.248047	0.249204	0.350791	0.457336	0.496094	0.592012	0.744141	0.809401	0.956917	1.03523	1.24023	1.2648	1.44635	1.59668	1.84728	2.28688	2.76365	3.33466	4.28195	8.55312
0.05094	0.1492	0.248047	0.24944	0.350791	0.457617	0.496094	0.59267	0.744141	0.809952	0.957325	1.03649	1.24023	1.2648	1.44635	1.60027	1.85113	2.28688	2.76448	3.33713	4.32104	8.6958
0.0510317	0.149332	0.248047	0.249816	0.350791	0.457646	0.496094	0.594248	0.744141	0.810498	0.958024	1.03842	1.24023	1.2648	1.44635	1.60257	1.85546	2.28688	2.76918	3.33713	4.33195	8.73815
0.051116	0.149493	0.248047	0.249943	0.350791	0.458072	0.496094	0.594401	0.744141	0.811307	0.958283	1.04091	1.24023	1.2648	1.44635	1.60477	1.85788	2.28688	2.76966	3.33713	4.36488	8.99149
0.0512329	0.149721	0.248047	0.250273	0.350791	0.458529	0.496094	0.595007	0.744141	0.812172	0.960459	1.04121	1.24023	1.2648	1.44635	1.60561	1.85926	2.28688	2.77098	3.33713	4.3884	9.05286
0.0514362	0.149796	0.248047	0.250334	0.350791	0.458662	0.496094	0.595497	0.744141	0.81253	0.961447	1.0441	1.24023	1.2648	1.44638	1.60619	1.87223	2.28688	2.77325	3.33713	4.4078	9.10031
0.0514735	0.149936	0.248047	0.250798	0.350791	0.458696	0.496094	0.595661	0.744141	0.816316	0.963644	1.04553	1.24023	1.2648	1.45448	1.6072	1.88461	2.28688	2.77325	3.33713	4.41635	9.20785
0.0514773	0.149974	0.248047	0.250854	0.350791	0.459762	0.496513	0.596103	0.744141	0.816405	0.963801	1.04646	1.24023	1.2648	1.45594	1.61764	1.8847	2.28688	2.77325	3.33713	4.46173	9.22788
0.0514773	0.150079	0.248047	0.251433	0.350791	0.460047	0.49679	0.596153	0.744141	0.818184	0.965646	1.05058	1.24023	1.2648	1.45869	1.6208	1.88907	2.28688	2.77325	3.33713	4.47173	9.26115
0.0514851	0.150211	0.248047	0.2517	0.350791	0.460804	0.497826	0.596898	0.744141	0.819988	0.96753	1.05144	1.24023	1.26762	1.45978	1.62088	1.88907	2.28688	2.77325	3.33713	4.47173	9.2678
0.0514878	0.150344	0.248047	0.251928	0.350791	0.461882	0.498076	0.597094	0.744141	0.820442	0.967573	1.05237	1.24023	1.26796	1.46393	1.62147	1.88907	2.28688	2.77325	3.33713	4.49232	9.44534
0.0516434	0.150714	0.248047	0.251951	0.350791	0.462001	0.499098	0.598143	0.744141	0.822506	0.968173	1.05237	1.24023	1.27564	1.46456	1.6257	1.88907	2.3025	2.77325	3.33713	4.5064	9.49407
0.0517283	0.15073	0.248047	0.252178	0.350791	0.462494	0.500647	0.598253	0.744141	0.822521	0.968424	1.05237	1.24023	1.27772	1.47097	1.63405	1.91472	2.31024	2.77325	3.33713	4.56029	9.58437
0.0520114	0.150792	0.248047	0.252307	0.350791	0.462626	0.501724	0.599923	0.744141	0.822987	0.968649	1.05237	1.24023	1.27879	1.47186	1.63587	1.91721	2.31396	2.77325	3.33713	4.56029	9.68654
0.052012	0.150802	0.248047	0.253075	0.350791	0.464675	0.501889	0.600205	0.744141	0.824137	0.968721	1.05237	1.24023	1.28129	1.47466	1.63597	1.91848	2.31828	2.77325	3.34399	4.56396	9.7467
0.052067	0.151429	0.248047	0.253417	0.350791	0.46488	0.502404	0.600554	0.744141	0.824831	0.974949	1.05237	1.24023	1.28431	1.47611	1.64628	1.92616	2.32183	2.77325	3.35797	4.5717	9.99909
0.0521149	0.151646	0.248047	0.254013	0.350791	0.46543	0.503123	0.601877	0.744141	0.824917	0.978341	1.05237	1.24023	1.28597	1.47746	1.64805	1.93537	2.32256	2.77325	3.3738	4.57376	10.1214
0.0523035	0.151668	0.248047	0.25403	0.350791	0.465551	0.503139	0.602085	0.744141	0.825772	0.981502	1.05237	1.24023	1.2918	1.47952	1.6498	1.93731	2.33557	2.77325	3.3738	4.61381	10.2272
0.0525374	0.151671	0.248047	0.254076	0.350791	0.466121	0.503217	0.603266	0.744141	0.826662	0.982615	1.05237	1.24023	1.29549	1.48663	1.65129	1.93731	2.34007	2.77325	3.38392	4.61559	10.3171
0.0525921	0.151742	0.248047	0.254738	0.350791	0.466442	0.506881	0.603528	0.744141	0.826718	0.982647	1.05237	1.24023	1.29591	1.48685	1.65876	1.93731	2.34007	2.77325	3.39564	4.61708	10.4121
0.0526416	0.151977	0.248047	0.255319	0.350791	0.467098	0.50791	0.603877	0.744141	0.829178	0.984281	1.05237	1.24023	1.29922	1.48828	1.66086	1.93731	2.34007	2.77325	3.41241	4.62951	10.4337
0.0527415	0.152222	0.248047	0.255387	0.350791	0.467752	0.508264	0.603937	0.744141	0.829368	0.984464	1.05237	1.24023	1.2998	1.48828	1.66217	1.93731	2.34007	2.77325	3.41812	4.6339	10.5267
0.0527683	0.152609	0.248047	0.256127	0.350791	0.468972	0.508266	0.604261	0.744141	0.830002	0.988694	1.05237	1.24023	1.30314	1.48828	1.66395	1.93731	2.34007	2.77325	3.44004	4.6339	10.5456
0.0528014	0.152751	0.248047	0.257481	0.350791	0.469156	0.509064	0.6048	0.744141	0.831926	0.989759	1.05237	1.24023	1.30349	1.48828	1.66395	1.93731	2.34007	2.77325	3.44636	4.6339	10.5529
0.053082	0.153026	0.248047	0.257533	0.350791	0.469309	0.509539	0.604871	0.744141	0.832585	0.990619	1.05255	1.24023	1.30404	1.48828	1.66395	1.93731	2.34007	2.77325	3.45489	4.6339	10.6545
0.0530843	0.153342	0.248047	0.257904	0.350791	0.469768	0.509839	0.605618	0.744141	0.834249	0.990881	1.05297	1.24023	1.30497	1.48828	1.66395	1.93731	2.34007	2.77325	3.45489	4.63901	10.6689
0.0532269	0.153399	0.248047	0.258024	0.350791	0.469823	0.510926	0.606348	0.744141	0.834681	0.991404	1.05472	1.24023	1.30832	1.48828	1.66395	1.93731	2.34007	2.77325	3.47083	4.64264	10.7092
0.0532529	0.15348	0.248047	0.258066	0.350791	0.469836	0.511637	0.607131	0.744141	0.83553	0.99217	1.05516	1.24023	1.30907	1.48828	1.66395	1.93731	2.3436	2.78844	3.47686	4.65255	10.8628
0.0535787	0.153581	0.248047	0.258313	0.350791	0.470169	0.51172	0.608249	0.744141	0.836009	0.992188	1.05553	1.24023	1.31081	1.48828	1.66624	1.93731	2.35318	2.79244	3.48482	4.67283	10.8971
0.0536347	0.153625	0.248047	0.25853	0.350791	0.470456	0.512494	0.610266	0.744141	0.836285	0.992188	1.05971	1.24023	1.3127	1.48828	1.68067	1.93731	2.35318	2.79496	3.4924	4.67988	10.8971
0.0537507	0.153698	0.248047	0.258619	0.350791	0.470599	0.51427	0.610479	0.744141	0.83651	0.992188	1.06244	1.24023	1.31578	1.48828	1.68615	1.93731	2.36812	2.80633	3.49258	4.6817	10.8971
0.0540004	0.153707	0.248047	0.25887	0.350791	0.471258	0.514647	0.6106	0.744141	0.838522	0.992188	1.06638	1.24023	1.31595	1.48828	1.68908	1.93731	2.37211	2.80633	3.50791	4.68454	10.9815
0.0543223	0.15375	0.248047	0.259745	0.350791	0.471636	0.51494	0.61197	0.744141	0.841319	0.992188	1.06845	1.24023	1.31645	1.48828	1.68961	1.93731	2.38891	2.81582	3.50791	4.7014	10.9843
0.0543224	0.153883	0.248047	0.260536	0.350791	0.471841	0.515784	0.612236	0.744141	0.841338	0.992188	1.06853	1.24023	1.3229	1.48828	1.70055	1.93731	2.39336	2.82521	3.50791	4.73398	11.14
0.0543896	0.153909	0.248047	0.260618	0.350791	0.472229	0.516656	0.613657	0.744141	0.842167	0.992188	1.07433	1.24023	1.32484	1.48828	1.70456	1.93731	2.39858	2.82529	3.50791	4.73591	11.1621
0.054461	0.15503	0.248047	0.260676	0.350791	0.472295	0.518176	0.614042	0.744141	0.843741	0.992188	1.07778	1.24023	1.32884	1.48828	1.70632	1.95957	2.426	2.82584	3.50791	4.75343	11.2609
0.0544666	0.155064	0.248047	0.26079	0.350791	0.472295	0.518554	0.614483	0.744141	0.843991	0.992188	1.07852	1.24023	1.32896	1.48828	1.71338	1.96234	2.44298	2.82817	3.50791	4.76465	11.2963
0.0545118	0.155147	0.248047	0.261086	0.350791	0.472295	0.518881	0.615746	0.744141	0.844143	0.992188	1.0807	1.24023	1.32977	1.48828	1.7189	1.96565	2.44298	2.82817	3.50791	4.77128	11.3832
0.054678	0.155156	0.248047	0.261203	0.350791	0.472295	0.52063	0.616175	0.744141	0.846244	0.992188	1.08494	1.24023	1.33	1.48828	1.72182	1.96832	2.44298	2.82817	3.50791	4.77958	11.4344
0.0547286	0.155192	0.248047	0.261469	0.350791	0.472295	0.520957	0.616337	0.744141	0.847261	0.992188	1.08691	1.24023	1.33218	1.48828	1.72749	1.97164	2.44298	2.82817	3.50791	4.8162	11.4344
0.0547624	0.155294	0.248047	0.263222	0.350791	0.472325	0.52142	0.617045	0.744141	0.848067	0.992188	1.09006	1.24023	1.33242	1.48828	1.72788	1.97756	2.44519	2.82817	3.52541	4.8162	11.4344
0.054791	0.155444	0.248047	0.263349	0.350791	0.472327	0.521715	0.617436	0.744141	0.848309	0.992188	1.09136	1.24023	1.33464	1.48828	1.73292	1.97965	2.44911	2.82817	3.52541	4.8162	11.4532
0.0548158	0.155565	0.248047	0.26442	0.350791	0.47312	0.523204	0.617579	0.744141	0.849861	0.992188	1.0953	1.24023	1.33577	1.48828	1.73633	1.98438	2.45554	2.82817	3.52541	4.8162	11.4532
0.0548207	0.155568	0.248047	0.26478	0.350791	0.473502	0.523374	0.618734	0.744141	0.851024	0.992188	1.09534	1.24023	1.33577	1.49893	1.73633	1.98438	2.45554	2.82817	3.52541	4.83104	11.4532
0.0549289	0.155859	0.248047	0.265458	0.350791	0.47354	0.525042	0.6188	0.744141	0.851479	0.992188	1.09726	1.24023	1.33577	1.49896	1.73633	1.98438	2.45554	2.82817	3.52541	4.83357	11.4774
0.0550186	0.155917	0.248047	0.265516	0.350791	0.473937	0.52541	0.623352	0.744141	0.85252	0.992188	1.10273	1.24023	1.33577	1.50124	1.73633	1.98438	2.45554	2.82817	3.52541	4.87335	11.5016
0.0550298	0.156035	0.248047	0.265948	0.350791	0.474077	0.525598	0.623501	0.744141	0.856106	0.992188	1.10413	1.24023	1.33577	1.50418	1.73633	1.98438	2.45994	2.82817	3.52745	4.87777	11.5068
0.0550309	0.156514	0.248047	0.266373	0.350791	0.474089	0.526522	0.624167	0.744141	0.857344	0.992188	1.1093	1.24023	1.33577	1.5053	1.73633	1.98438	2.4633	2.82817	3.53073	4.88596	11.5308
0.0551185	0.156524	0.248047	0.266464	0.350791	0.474625	0.527878	0.624314	0.744141	0.85793	0.992188	1.1093	1.24023	1.33577	1.50721	1.73633	1.98438	2.48047	2.86292	3.53333	4.88596	11.5415
0.0551429	0.156781	0.248047	0.266645	0.350812	0.47545	0.527978	0.624988	0.744141	0.858938	0.992188	1.1093	1.24023	1.33577	1.508	1.73633	1.98438	2.48047	2.8677	3.53932	4.921	11.5814
0.0552138	0.156886	0.248047	0.266867	0.350839	0.475574	0.528369	0.62714	0.744141	0.859325	0.992188	1.1093	1.24023	1.33577	1.50881	1.73633	1.98438	2.48047	2.8927	3.54185	4.94555	11.6265
0.0552716	0.157014	0.248047	0.267406	0.351834	0.475924	0.528557	0.627397	0.744141	0.861225	0.992188	1.1093	1.24023	1.33577	1.50881	1.73633	1.98438	2.48047	2.8927	3.55149	4.94575	11.6767
0.0553313	0.157506	0.248047	0.26744	0.352375	0.47617	0.528811	0.628004	0.744141	0.861445	0.992188	1.1093	1.24023	1.33577	1.50881	1.73633	1.98808	2.48047	2.8927	3.55149	4.94728	11.6767
0.0554098	0.157593	0.248047	0.269068	0.352983	0.476252	0.528976	0.628396	0.744141	0.863869	0.992188	1.1093	1.24023	1.33577	1.50881	1.73633	1.98862	2.48047	2.8927	3.55428	4.95371	11.8571
0.0554213	0.158032	0.248047	0.269242	0.354096	0.476613	0.529023	0.629088	0.744141	0.866571	0.992188	1.1093	1.24023	1.33577	1.50881	1.73633	1.99982	2.48047	2.8927	3.55668	4.96094	11.87
0.0554989	0.158035	0.248047	0.269509	0.354715	0.477959	0.529252	0.629398	0.744141	0.868167	0.992188	1.1093	1.24023	1.33577	1.50881	1.73633	1.99982	2.48047	2.8927	3.57205	4.96713	11.87
0.0555459	0.158057	0.248047	0.27064	0.354869	0.478005	0.530065	0.63123	0.744141	0.870674	0.992188	1.1093	1.24023	1.33577	1.50908	1.73633	1.99982	2.48047	2.8927	3.57654	4.98283	12.0705
0.0555459	0.158127	0.248047	0.270863	0.354938	0.478013	0.530202	0.633828	0.744141	0.87207	0.992188	1.1093	1.24023	1.33577	1.51036	1.73633	1.99982	2.48047	2.8927	3.57738	5.01644	12.1314
0.0558454	0.15821	0.248047	0.271254	0.354974	0.478021	0.530659	0.635374	0.744141	0.873225	0.992188	1.1093	1.24023	1.33577	1.51154	1.73633	1.99982	2.48047	2.8927	3.57738	5.01644	12.1619
0.0562812	0.158574	0.248047	0.271414	0.355524	0.478285	0.530924	0.635639	0.744141	0.876381	0.992188	1.1093	1.24023	1.33577	1.51289	1.73674	1.99982	2.48047	2.90131	3.58255	5.02257	12.1619
0.0563527	0.159248	0.248047	0.27144	0.356273	0.48087	0.532209	0.635686	0.744141	0.876459	0.992188	1.1093	1.24023	1.33577	1.51402	1.74849	2.01815	2.48047	2.903	3.59233	5.04282	12.2375
0.0565027	0.159323	0.248047	0.272584	0.356571	0.48134	0.532611	0.635792	0.744141	0.876869	0.992188	1.1093	1.24023	1.33577	1.51958	1.75031	2.02322	2.48047	2.90331	3.60523	5.04733	12.4023
0.0565092	0.15935	0.248047	0.272789	0.356603	0.482492	0.533143	0.637228	0.744141	0.877618	0.992188	1.1093	1.24023	1.33577	1.52828	1.75325	2.04356	2.48047	2.90331	3.60901	5.05918	12.4048
0.0567704	0.159633	0.248047	0.274023	0.356638	0.48293	0.535086	0.638051	0.744141	0.87864	0.992188	1.1093	1.24023	1.33577	1.5306	1.75396	2.04545	2.48047	2.9075	3.61415	5.09689	12.5748
0.0568585	0.159649	0.248047	0.274469	0.356941	0.484041	0.535382	0.638866	0.744141	0.879402	0.992188	1.1093	1.24023	1.33577	1.53387	1.75396	2.05344	2.48047	2.90805	3.61423	5.09938	12.6407
0.0569334	0.159741	0.248047	0.275631	0.357675	0.484517	0.536251	0.639368	0.744141	0.880774	0.992188	1.1093	1.24023	1.33577	1.53883	1.75396	2.05352	2.48047	2.91726	3.63941	5.10583	12.6528
0.0569862	0.159788	0.248047	0.275741	0.357989	0.484871	0.536867	0.639409	0.744141	0.881577	0.992188	1.1093	1.24023	1.33577	1.54114	1.75396	2.05803	2.48047	2.92743	3.65174	5.11362	12.711
0.0570556	0.159789	0.248047	0.275761	0.358774	0.485026	0.53731	0.64078	0.744141	0.881951	0.992188	1.1093	1.24023	1.33855	1.54514	1.75396	2.05889	2.48047	2.92773	3.65486	5.11362	12.769
0.057133	0.160067	0.248047	0.275944	0.359395	0.486267	0.53793	0.641114	0.744141	0.88292	0.992188	1.10951	1.24023	1.34161	1.54639	1.75396	2.06117	2.48954	2.93379	3.66237	5.14942	12.8984
0.0571394	0.160084	0.248047	0.276	0.359888	0.48666	0.53811	0.64201	0.744141	0.88402	0.992188	1.11012	1.24023	1.34418	1.54672	1.75396	2.06822	2.49284	2.94803	3.66259	5.15295	12.8984
0.0572317	0.160273	0.248047	0.276309	0.360088	0.487283	0.538145	0.643392	0.744141	0.885332	0.992188	1.11111	1.24023	1.34875	1.54704	1.75396	2.07993	2.49284	2.95178	3.66323	5.18115	12.9365
0.057233	0.160295	0.248047	0.277055	0.360628	0.487806	0.540539	0.643535	0.744141	0.886542	0.992188	1.11323	1.24023	1.36412	1.54761	1.75396	2.09077	2.49284	2.95698	3.68748	5.21489	12.9959
0.0573949	0.16046	0.248047	0.277637	0.360664	0.487843	0.540811	0.643595	0.744141	0.891651	0.992188	1.11348	1.24023	1.36443	1.54837	1.75396	2.10475	2.49284	2.97011	3.68748	5.21489	13.1348
0.0575112	0.16064	0.248047	0.2777	0.360947	0.488014	0.541131	0.643859	0.744141	0.892391	0.992188	1.11424	1.24023	1.37429	1.54934	1.75396	2.10475	2.49284	2.97256	3.68748	5.23255	13.2374
0.0575262	0.160709	0.248047	0.278346	0.361527	0.488668	0.541706	0.644568	0.744141	0.89335	0.992188	1.11442	1.24023	1.37495	1.55001	1.75396	2.10475	2.49284	2.97482	3.68748	5.23813	13.2607
0.057713	0.160714	0.248047	0.279081	0.361733	0.489073	0.542119	0.644981	0.744141	0.894214	0.992188	1.11631	1.24023	1.38189	1.5509	1.75396	2.11931	2.49284	2.97627	3.68748	5.25149	13.2954
0.0577949	0.160774	0.248047	0.279334	0.361918	0.490645	0.542645	0.64506	0.744141	0.89424	0.992188	1.11814	1.24023	1.3833	1.55428	1.75396	2.11931	2.49284	2.97656	3.68748	5.26187	13.3784
0.057931	0.160951	0.248047	0.279501	0.361954	0.4913	0.542777	0.645471	0.744141	0.894346	0.992188	1.11845	1.24023	1.38412	1.56064	1.75396	2.11931	2.50526	2.98688	3.68748	5.26187	13.4332
0.0580033	0.161326	0.248047	0.281458	0.362119	0.492216	0.54281	0.646464	0.744141	0.894346	0.992188	1.11989	1.24023	1.38453	1.56132	1.75396	2.11931	2.50932	2.98688	3.68748	5.27849	14.0185
0.0580871	0.161334	0.248047	0.281618	0.363275	0.49281	0.544053	0.647102	0.744141	0.894346	0.992188	1.12203	1.24023	1.38639	1.5618	1.75396	2.11931	2.51738	2.98688	3.68748	5.30843	14.3546
0.0580913	0.161429	0.248047	0.28175	0.363734	0.493279	0.544209	0.647975	0.744141	0.894346	0.992188	1.12365	1.24023	1.38831	1.56247	1.75396	2.12471	2.52036	2.98688	3.68748	5.30843	14.3995
0.0583655	0.161439	0.248047	0.281791	0.36395	0.494755	0.544526	0.648463	0.744141	0.894346	0.992188	1.12387	1.24023	1.38865	1.56564	1.75396	2.13378	2.52569	2.98688	3.68748	5.32072	14.7437
0.058435	0.16155	0.248047	0.282058	0.36411	0.495023	0.544787	0.648564	0.744141	0.894346	0.992188	1.13249	1.24023	1.38895	1.56879	1.75396	2.13378	2.52658	2.98688	3.70249	5.35133	14.9571
0.0584499	0.162585	0.248047	0.282468	0.364384	0.495121	0.545181	0.649424	0.744141	0.894346	0.992188	1.13803	1.24023	1.38978	1.56879	1.75396	2.13378	2.52959	2.98688	3.70841	5.36607	15.1776
0.0584562	0.162693	0.248047	0.282572	0.364432	0.495345	0.545607	0.65107	0.744141	0.894346	0.992188	1.13858	1.24023	1.39406	1.56879	1.75396	2.13378	2.52959	2.98688	3.71579	5.43483	15.7524
0.0586824	0.162855	0.248047	0.282606	0.364542	0.495604	0.547509	0.653316	0.744141	0.894346	0.992188	1.13918	1.24023	1.39421	1.56879	1.75396	2.13378	2.52959	2.98873	3.7207	5.44009	15.8767
0.0588144	0.162974	0.248047	0.282695	0.36498	0.496026	0.547599	0.654328	0.744141	0.894346	0.992188	1.14383	1.24023	1.39442	1.56879	1.75396	2.13378	2.52959	2.9904	3.7207	5.44699	16.0331
0.0588849	0.163531	0.248047	0.283191	0.366505	0.496094	0.547857	0.656381	0.744141	0.894346	0.992188	1.14637	1.24023	1.397	1.56879	1.75396	2.13378	2.53673	2.99253	3.7207	5.45703	16.0919
0.058887	0.163678	0.248047	0.283306	0.367311	0.496094	0.548255	0.656817	0.744141	0.894346	0.992188	1.14665	1.24023	1.40171	1.56879	1.75396	2.13378	2.53687	2.99716	3.7207	5.46267	16.8963
0.0589353	0.163701	0.248047	0.283966	0.367821	0.496094	0.548507	0.658018	0.744424	0.894346	0.992188	1.1476	1.24023	1.40249	1.56879	1.75396	2.13378	2.53999	3.00182	3.7207	5.46267	17.5273
0.0589757	0.163752	0.248047	0.284048	0.368524	0.496094	0.550278	0.66075	0.744797	0.894346	0.992188	1.15238	1.24023	1.40254	1.56879	1.75396	2.13378	2.55379	3.00545	3.72546	5.47953	20.0059
0.0591264	0.163947	0.248047	0.284684	0.368877	0.496094	0.550877	0.66088	0.744844	0.894346	0.992188	1.15305	1.24023	1.40317	1.57035	1.75396	2.13378	2.5538	3.01762	3.72896	5.49778	22.441
0.0591301	0.164353	0.248047	0.284965	0.369806	0.496094	0.552218	0.661328	0.745637	0.894346	0.992188	1.15362	1.24023	1.40317	1.57045	1.75396	2.13378	2.5538	3.01762	3.74224	5.57416
0.059152	0.164481	0.248047	0.285091	0.369828	0.496094	0.552914	0.662343	0.748388	0.894346	0.992188	1.15508	1.24023	1.40317	1.57218	1.75396	2.13378	2.5538	3.0278	3.77814	5.57416
0.0591644	0.164499	0.248047	0.285206	0.370074	0.496094	0.552959	0.662711	0.748486	0.894346	0.992188	1.15692	1.24023	1.40317	1.57547	1.75396	2.13378	2.5538	3.0278	3.78627	5.7534
0.0591815	0.164509	0.248047	0.285926	0.370275	0.496094	0.55465	0.663572	0.748786	0.894346	0.992188	1.15801	1.24023	1.40317	1.57658	1.75396	2.13378	2.5538	3.0278	3.80441	5.81192
0.059223	0.164904	0.248047	0.286108	0.370305	0.496094	0.55465	0.663858	0.749802	0.894346	0.992188	1.1631	1.24023	1.40317	1.5808	1.75396	2.13378	2.5538	3.0278	3.81117	5.83833
0.0592269	0.164914	0.248047	0.286249	0.372117	0.496094	0.55465	0.664118	0.753735	0.894346	0.992188	1.16853	1.24023	1.40317	1.58547	1.75396	2.13378	2.5538	3.02943	3.82928	5.83833
0.0592645	0.165324	0.248047	0.286641	0.372216	0.496094	0.55465	0.664138	0.754294	0.894346	0.992188	1.17339	1.24023	1.40317	1.58827	1.75396	2.13378	2.5538	3.03161	3.85412	5.88033
0.0592849	0.166067	0.248047	0.286663	0.372319	0.496094	0.55465	0.665473	0.756531	0.894346	0.992301	1.1743	1.24023	1.40317	1.58827	1.75396	2.13497	2.5538	3.0402	3.8587	5.88033
0.0598086	0.166184	0.248047	0.287101	0.372426	0.496094	0.55465	0.667397	0.757782	0.894346	0.992539	1.17706	1.24023	1.40317	1.58827	1.75396	2.14721	2.5538	3.04248	3.86499	5.88033
0.0598535	0.166417	0.248047	0.287182	0.372806	0.496094	0.55465	0.667961	0.758272	0.894346	0.996513	1.17743	1.24023	1.40317	1.58827	1.75396	2.15165	2.5538	3.04338	3.86811	5.88033
0.0599629	0.166451	0.248047	0.287958	0.374206	0.496094	0.55465	0.669994	0.758311	0.894346	1.00077	1.17823	1.24023	1.40317	1.58827	1.75396	2.1551	2.5538	3.05797	3.87462	5.91684
0.0600522	0.166758	0.248047	0.288204	0.374312	0.496094	0.55465	0.670303	0.758884	0.89687	1.00157	1.18388	1.24023	1.40317	1.58827	1.75396	2.15948	2.5538	3.06808	3.87462	5.91684
0.0600627	0.166804	0.248047	0.288975	0.374711	0.496094	0.55465	0.675246	0.759594	0.898305	1.00773	1.18459	1.24023	1.40317	1.58827	1.75396	2.1615	2.5538	3.06817	3.87462	5.97376
0.0601648	0.166853	0.248047	0.289162	0.375405	0.496094	0.55465	0.675489	0.759661	0.899882	1.0093	1.18602	1.24023	1.40317	1.58827	1.75396	2.16343	2.5538	3.06817	3.87462	6.00458
0.0602476	0.167355	0.248047	0.289178	0.375791	0.496094	0.55465	0.67774	0.759887	0.900644	1.01317	1.18899	1.24023	1.40503	1.58827	1.75396	2.17046	2.5538	3.06817	3.87462	6.00458
0.0603231	0.167378	0.248047	0.289524	0.377133	0.496094	0.55465	0.678067	0.762539	0.90179	1.0159	1.19151	1.24023	1.40546	1.58827	1.75396	2.17511	2.5538	3.08066	3.87462	6.00458
0.0605403	0.167466	0.248047	0.289674	0.377562	0.496094	0.55465	0.678093	0.762541	0.90214	1.01812	1.19343	1.24023	1.40728	1.58827	1.75396	2.18738	2.5538	3.10347	3.88255	6.03524
0.0606169	0.167521	0.248047	0.289789	0.378068	0.496094	0.55465	0.678095	0.763792	0.905594	1.01883	1.19446	1.24023	1.40916	1.58827	1.75396	2.19706	2.5538	3.11263	3.88255	6.12631
0.0608481	0.167954	0.248047	0.290084	0.378107	0.496094	0.55465	0.679922	0.764722	0.909738	1.02078	1.19946	1.24023	1.40932	1.58827	1.75396	2.20575	2.5538	3.11754	3.88777	6.12631
0.0608809	0.168033	0.248047	0.290145	0.378499	0.496094	0.55465	0.681089	0.767374	0.910087	1.02171	1.20091	1.24023	1.41041	1.58827	1.75396	2.2186	2.5538	3.14442	3.90834	6.12631
0.0610115	0.168171	0.248047	0.291086	0.379766	0.496094	0.55465	0.681385	0.768078	0.912404	1.02272	1.20122	1.24023	1.41412	1.58827	1.75479	2.2186	2.5538	3.15712	3.92197	6.13634
0.0611118	0.168208	0.248047	0.291311	0.37993	0.496094	0.55465	0.68205	0.768804	0.913435	1.02272	1.20621	1.24023	1.41483	1.58827	1.77022	2.2186	2.5538	3.15712	3.92197	6.13634
0.0611651	0.168562	0.248047	0.291791	0.380506	0.496094	0.55465	0.682386	0.769419	0.9142	1.02272	1.20712	1.24023	1.41662	1.58827	1.77737	2.23242	2.56026	3.15712	3.92197	6.14135
0.0612555	0.168637	0.248047	0.291816	0.380558	0.496094	0.55465	0.683374	0.77027	0.916682	1.02272	1.21105	1.24023	1.42419	1.58827	1.78869	2.23242	2.57442	3.16615	3.92197	6.20117
0.0613479	0.168651	0.248047	0.292163	0.380914	0.496094	0.55465	0.683831	0.772225	0.916919	1.02272	1.21388	1.24023	1.42759	1.58827	1.78869	2.23242	2.5817	3.16723	3.97114	6.20117
0.0615569	0.169365	0.248047	0.292197	0.381572	0.496094	0.55465	0.684019	0.776084	0.918017	1.02272	1.21592	1.24023	1.42769	1.58827	1.78869	2.23242	2.58969	3.17655	3.97649	6.20117
0.0615799	0.169461	0.248047	0.294226	0.381713	0.496094	0.55465	0.68402	0.776115	0.918094	1.02272	1.2177	1.24023	1.43103	1.58827	1.78869	2.23242	2.58969	3.17655	3.99964	6.22098
0.0616448	0.169504	0.248047	0.294399	0.382055	0.496094	0.55465	0.684179	0.776118	0.918732	1.02272	1.22056	1.24023	1.4323	1.58827	1.78869	2.23242	2.58969	3.17655	4.00732	6.32398
0.0616946	0.169589	0.248047	0.294434	0.382523	0.496094	0.55465	0.685081	0.777202	0.920689	1.02272	1.22089	1.24023	1.43461	1.58827	1.78869	2.23242	2.58969	3.17655	4.01289	6.3531
0.0617395	0.169952	0.248047	0.295284	0.383854	0.496094	0.55465	0.685179	0.777423	0.922983	1.02272	1.22508	1.24023	1.4351	1.58827	1.78869	2.23242	2.58969	3.17655	4.03791	6.35794
0.0619145	0.170226	0.248047	0.295795	0.385453	0.496094	0.55465	0.685686	0.777849	0.928177	1.02272	1.22515	1.24023	1.43859	1.58827	1.78869	2.23242	2.58969	3.17655	4.03791	6.37727
0.0619243	0.170264	0.248047	0.295816	0.385916	0.496094	0.55465	0.686988	0.77794	0.928324	1.02272	1.22581	1.24023	1.44212	1.58827	1.78869	2.23242	2.58969	3.17655	4.0518	6.51094
0.0619683	0.170554	0.248047	0.295895	0.386071	0.496094	0.55465	0.687581	0.778969	0.928583	1.02272	1.22826	1.24023	1.44433	1.58827	1.78869	2.23242	2.61917	3.17655	4.06827	6.54863
0.0619761	0.170749	0.248047	0.297107	0.386223	0.496094	0.55465	0.68792	0.778995	0.928646	1.02272	1.2301	1.24023	1.44635	1.58827	1.78869	2.23242	2.62523	3.17655	4.06827	6.67426
0.0620446	0.170796	0.248047	0.297573	0.386475	0.496094	0.55465	0.687984	0.779507	0.929606	1.02272	1.23073	1.24023	1.44635	1.58827	1.79017	2.23242	2.62732	3.1864	4.09089	6.70186
0.0620902	0.170855	0.248047	0.297695	0.386496	0.496094	0.55465	0.689681	0.780811	0.9302	1.02272	1.23092	1.24023	1.44635	1.58827	1.79023	2.23242	2.63494	3.18755	4.09572	6.70186
0.0621232	0.17098	0.248047	0.297768	0.386819	0.496094	0.55465	0.690206	0.781027	0.930606	1.02272	1.23245	1.24023	1.44635	1.58827	1.79571	2.23242	2.63677	3.20225	4.12832	6.7749
0.0621232	0.171115	0.248047	0.298187	0.388058	0.496094	0.55465	0.690794	0.781118	0.93086	1.02272	1.23258	1.24023	1.44635	1.58827	1.79601	2.23242	2.63677	3.21006	4.12832	6.94974
0.062162	0.171174	0.248047	0.29866	0.388112	0.496094	0.55465	0.691713	0.78218	0.933553	1.02272	1.2341	1.24748	1.44635	1.58827	1.80581	2.23881	2.63751	3.22461	4.12832	7.09431
0.0622914	0.171286	0.248047	0.298681	0.388175	0.496094	0.55465	0.693403	0.782249	0.933722	1.02272	1.23422	1.24807	1.44635	1.58827	1.80581	2.24616	2.63766	3.22461	4.16112	7.15906
0.0623642	0.171451	0.248047	0.298809	0.38841	0.496094	0.55465	0.695666	0.782346	0.935708	1.02272	1.24023	1.24847	1.44635	1.58827	1.81077	2.24616	2.65313	3.22461	4.2095	7.19336
0.062369	0.171622	0.248047	0.299447	0.389393	0.496094	0.55465	0.696479	0.784393	0.936786	1.02272	1.24023	1.25	1.44635	1.58827	1.82135	2.24616	2.65682	3.23414	4.22409	7.19763
0.0624046	0.17175	0.248047	0.299453	0.38954	0.496094	0.55465	0.699141	0.784393	0.940327	1.02272	1.24023	1.25474	1.44635	1.58827	1.8223	2.24616	2.66892	3.23414	4.22794	7.29949
0.0624408	0.171996	0.248047	0.300255	0.391042	0.496094	0.55465	0.699242	0.784393	0.942622	1.02272	1.24023	1.25616	1.44635	1.58827	1.83821	2.24616	2.67155	3.23414	4.23863	7.37496
0.0625611	0.172469	0.248047	0.300988	0.391606	0.496094	0.55465	0.700598	0.784393	0.942958	1.02272	1.24023	1.25825	1.44635	1.58827	1.84008	2.24616	2.67155	3.24739	4.23863	7.56035
0.0626113	0.172471	0.248047	0.30132	0.391907	0.496094	0.55465	0.700982	0.784393	0.945269	1.02332	1.24023	1.25868	1.44635	1.58827	1.84496	2.24616	2.67155	3.25262	4.24198	7.58878
0.0627144	0.172703	0.248047	0.301342	0.392308	0.496094	0.55465	0.701583	0.784393	0.9482	1.02598	1.24023	1.25974	1.44635	1.58827	1.85827	2.24616	2.67155	3.2572	4.24588	7.69345
0.0627427	0.172765	0.248047	0.301697	0.392339	0.496094	0.55465	0.701583	0.784393	0.949088	1.02691	1.24023	1.26372	1.44635	1.58827	1.85913	2.24616	2.67155	3.27538	4.24616	7.70544
0.062828	0.172841	0.248047	0.302326	0.392578	0.496094	0.55465	0.701583	0.784393	0.950213	1.02924	1.24023	1.2648	1.44635	1.58827	1.87034	2.25387	2.67862	3.2821	4.28623	7.72538
0.063007	0.172852	0.248047	0.303301	0.392829	0.496094	0.55465	0.701583	0.784393	0.950508	1.0294	1.24023	1.2648	1.44635	1.58827	1.87202	2.2553	2.68304	3.28958	4.28717	7.78883
0.0632145	0.172939	0.248047	0.30356	0.393393	0.496094	0.55465	0.701583	0.784393	0.953731	1.03135	1.24023	1.2648	1.44635	1.59506	1.88907	2.2779	2.68304	3.29062	4.33195	7.84393
0.063271	0.172962	0.248047	0.303773	0.39354	0.496094	0.55465	0.701583	0.784393	0.953751	1.03432	1.24023	1.2648	1.44635	1.60465	1.88907	2.28101	2.68304	3.29515	4.34755	7.91421
0.0633546	0.174356	0.248047	0.303821	0.393648	0.496094	0.55465	0.701583	0.784393	0.96092	1.03533	1.24023	1.2648	1.44635	1.61316	1.88907	2.28688	2.68304	3.30936	4.38213	7.98773
0.0636212	0.174405	0.248047	0.303921	0.393666	0.496094	0.55465	0.701583	0.784393	0.962739	1.03663	1.24023	1.2648	1.44635	1.61594	1.88907	2.28688	2.68304	3.3279	4.38217	7.99927
0.0636496	0.174958	0.248047	0.304055	0.393689	0.496094	0.55465	0.701583	0.784393	0.962929	1.04195	1.24023	1.2648	1.44635	1.61673	1.89423	2.28688	2.69447	3.3314	4.3884	8.01464
0.0637712	0.175579	0.248047	0.304938	0.393849	0.496094	0.55465	0.701583	0.784393	0.964046	1.04289	1.24023	1.2648	1.44635	1.61706	1.90861	2.28688	2.70109	3.33212	4.39124	8.0682
0.0639116	0.175767	0.248047	0.305683	0.395235	0.496094	0.554968	0.701583	0.784393	0.964944	1.04462	1.24023	1.2648	1.44635	1.61714	1.93	2.28688	2.70681	3.3332	4.39324	8.07582
0.0639639	0.176066	0.248047	0.30569	0.395741	0.496094	0.555389	0.701583	0.784393	0.964969	1.04733	1.24023	1.2648	1.44635	1.61734	1.93445	2.28688	2.70846	3.33713	4.3954	8.31975
0.0639803	0.176504	0.248047	0.3065	0.396195	0.496094	0.557232	0.701583	0.784393	0.965492	1.04847	1.24023	1.2648	1.44635	1.62279	1.93731	2.28688	2.72925	3.33713	4.40652	8.44817
0.0640154	0.176607	0.248047	0.306589	0.396578	0.496094	0.557596	0.701583	0.784393	0.970531	1.05004	1.24023	1.2648	1.44819	1.62628	1.93731	2.28836	2.73977	3.33713	4.40803	8.48451
0.0641503	0.176715	0.248047	0.307178	0.396854	0.496094	0.55815	0.701583	0.784393	0.971226	1.05092	1.24023	1.2648	1.44823	1.6329	1.93731	2.28889	2.73977	3.33713	4.40829	8.56391
0.0641694	0.176718	0.248047	0.307834	0.39744	0.496094	0.559048	0.701583	0.784393	0.972434	1.05237	1.24023	1.2648	1.45189	1.63499	1.93731	2.3116	2.73977	3.33713	4.41635	8.6781
0.0644035	0.17721	0.248047	0.307861	0.398167	0.496094	0.559658	0.701583	0.784393	0.973511	1.05237	1.24023	1.2648	1.45889	1.63702	1.93731	2.31847	2.73977	3.33713	4.4304	8.70994
0.0644113	0.177767	0.248047	0.307884	0.398344	0.496094	0.559812	0.701583	0.784393	0.97717	1.05237	1.24023	1.2648	1.46065	1.64025	1.93731	2.3323	2.74919	3.33713	4.43597	8.71347
0.0645956	0.177861	0.248047	0.308256	0.39848	0.496094	0.560038	0.701583	0.784393	0.97875	1.05237	1.24023	1.2648	1.46397	1.64041	1.93731	2.33538	2.75032	3.33713	4.4372	8.96407
0.064966	0.177898	0.248047	0.308353	0.398614	0.496094	0.560828	0.701583	0.784393	0.979497	1.05237	1.24023	1.2648	1.46414	1.64662	1.93731	2.34007	2.75309	3.33713	4.4525	8.99149
0.0649884	0.177917	0.248047	0.308485	0.39881	0.496094	0.56199	0.701827	0.784393	0.981477	1.05237	1.24023	1.2648	1.46725	1.64937	1.93731	2.34007	2.76495	3.33713	4.47173	9.20451
0.0652996	0.178275	0.248047	0.308826	0.398826	0.496094	0.562249	0.702307	0.784393	0.981654	1.05237	1.24023	1.2648	1.47108	1.65642	1.93731	2.34007	2.76803	3.33713	4.47173	9.42904
0.0653792	0.178383	0.248047	0.309155	0.398986	0.496094	0.562472	0.704185	0.784393	0.982625	1.05237	1.24023	1.2648	1.47306	1.66395	1.93731	2.34007	2.77325	3.33713	4.4838	9.44534
0.0654863	0.178433	0.248047	0.309664	0.399106	0.496094	0.563979	0.704253	0.784393	0.988355	1.05237	1.24023	1.2648	1.47471	1.66395	1.93731	2.34007	2.77325	3.33713	4.49232	9.50703
0.0655989	0.178917	0.248047	0.309941	0.400073	0.496094	0.564863	0.705567	0.784393	0.989982	1.05237	1.24023	1.2648	1.47505	1.66395	1.93731	2.34007	2.77325	3.33713	4.49232	9.68654
0.0656506	0.179174	0.248047	0.310487	0.400305	0.496094	0.565446	0.707089	0.784393	0.990043	1.05237	1.24023	1.2648	1.47598	1.66395	1.93731	2.34007	2.77325	3.33713	4.49517	9.8378
0.0656537	0.179579	0.248047	0.311054	0.40045	0.496094	0.565984	0.707815	0.784393	0.990379	1.05237	1.24023	1.2648	1.47686	1.66395	1.93731	2.34007	2.77325	3.33713	4.49814	9.87526
0.0660118	0.179993	0.248047	0.311076	0.400641	0.496094	0.566141	0.709583	0.784393	0.992188	1.05237	1.24023	1.2648	1.4798	1.66395	1.93731	2.34007	2.77325	3.33713	4.50834	9.90127
0.066136	0.18012	0.248047	0.31143	0.40115	0.496094	0.567215	0.710107	0.784393	0.992188	1.05237	1.24023	1.2648	1.48041	1.66395	1.93731	2.34007	2.77325	3.33914	4.51717	9.99909
0.0661816	0.180139	0.248047	0.311762	0.402212	0.496094	0.567227	0.710301	0.784393	0.992188	1.05237	1.24023	1.2648	1.48231	1.66762	1.93731	2.34007	2.77325	3.36794	4.56029	10.0827
0.066204	0.181082	0.248047	0.311819	0.402523	0.496094	0.567289	0.710772	0.784393	0.992188	1.05891	1.24023	1.2648	1.48458	1.67246	1.93731	2.34007	2.77325	3.37057	4.57376	10.1184
0.0662375	0.181246	0.248047	0.311849	0.403179	0.496094	0.569879	0.712917	0.784393	0.992188	1.05993	1.24023	1.26571	1.48828	1.68451	1.93731	2.34007	2.77325	3.3738	4.57376	10.1699
0.066249	0.18136	0.248047	0.311909	0.403465	0.496094	0.570439	0.714572	0.784393	0.992188	1.06272	1.24023	1.26921	1.48828	1.68515	1.93731	2.34007	2.77325	3.3738	4.57376	10.182
0.0664359	0.181627	0.248047	0.311983	0.404064	0.496094	0.571358	0.714744	0.784597	0.992188	1.06597	1.24023	1.2699	1.48828	1.70404	1.93731	2.34007	2.77325	3.3738	4.57376	10.1886
0.0667565	0.181668	0.248047	0.312061	0.405965	0.496094	0.571861	0.715737	0.785748	0.992188	1.06872	1.24023	1.27304	1.48828	1.73633	1.93731	2.34007	2.77325	3.3738	4.58061	10.1971
0.0668331	0.181676	0.248047	0.312332	0.406154	0.496094	0.57278	0.717097	0.787064	0.992188	1.07283	1.24023	1.27496	1.48828	1.73633	1.93731	2.34007	2.77325	3.3738	4.60166	10.2272
0.0670366	0.182222	0.248047	0.312646	0.407066	0.496094	0.573742	0.718075	0.787779	0.992188	1.07332	1.24023	1.27813	1.48828	1.73633	1.95684	2.34344	2.77325	3.3738	4.61394	10.3171
0.0673028	0.182719	0.248047	0.313086	0.407088	0.496094	0.573922	0.720847	0.78833	0.992188	1.07332	1.24023	1.28162	1.48828	1.73633	1.95993	2.34863	2.77325	3.37709	4.63176	10.323
0.0673195	0.182767	0.248047	0.313903	0.407216	0.496094	0.574924	0.720899	0.79099	0.992188	1.07629	1.24023	1.28761	1.48828	1.73633	1.96412	2.35318	2.77325	3.38043	4.6339	10.3498
0.0675228	0.183046	0.248047	0.314268	0.407289	0.496094	0.575486	0.720949	0.791249	0.992188	1.0775	1.24023	1.29213	1.48828	1.73633	1.9721	2.35318	2.78142	3.3959	4.6339	10.4121
0.0675246	0.183254	0.248047	0.314307	0.407676	0.496094	0.576261	0.721381	0.794311	0.992188	1.07955	1.24023	1.29523	1.48828	1.73633	1.98438	2.35318	2.7869	3.41276	4.63619	10.4121
0.0677781	0.183617	0.248047	0.314589	0.408183	0.496094	0.577115	0.721953	0.795622	0.992188	1.08018	1.24023	1.30209	1.48828	1.73633	1.98438	2.35318	2.7918	3.41584	4.6545	10.6053
0.0679496	0.183735	0.248047	0.314638	0.408673	0.496094	0.57735	0.724422	0.79813	0.992188	1.08281	1.24023	1.30216	1.48828	1.73633	1.98438	2.35845	2.79194	3.42481	4.65516	10.6053
0.0679721	0.183893	0.248047	0.315233	0.411664	0.496094	0.577561	0.724873	0.798939	0.992188	1.08723	1.24023	1.30543	1.48828	1.73633	1.98438	2.36386	2.79492	3.42572	4.6586	10.65
0.0681046	0.184007	0.248047	0.315249	0.411818	0.496094	0.577933	0.726124	0.799954	0.992188	1.08765	1.24023	1.30558	1.48828	1.73633	1.98438	2.36583	2.79699	3.44001	4.66038	10.6545
0.0681616	0.184469	0.248047	0.315566	0.412703	0.496094	0.578142	0.726353	0.800418	0.992188	1.08855	1.24023	1.30679	1.48828	1.73633	1.98438	2.37164	2.80633	3.44075	4.6744	10.6689
0.0681642	0.184845	0.248047	0.315595	0.412749	0.496094	0.57833	0.72709	0.80123	0.992188	1.08999	1.24023	1.30749	1.48828	1.73633	1.98438	2.37619	2.80633	3.44344	4.67676	10.7618
0.0682891	0.1857	0.248047	0.315652	0.413738	0.496094	0.578937	0.727373	0.804565	0.992188	1.09063	1.24023	1.30874	1.48828	1.73633	1.98438	2.37634	2.80633	3.44598	4.70958	10.8064
0.0684182	0.186122	0.248047	0.315712	0.413768	0.496094	0.580953	0.727373	0.805076	0.992188	1.09136	1.24023	1.3095	1.48828	1.73633	1.98438	2.37825	2.8156	3.45489	4.71802	10.815
0.0684614	0.186214	0.248047	0.316053	0.414018	0.496094	0.581335	0.727373	0.806628	0.992188	1.09526	1.24023	1.31407	1.48828	1.73633	1.98438	2.38565	2.82817	3.45489	4.71941	10.8292
0.0686795	0.186677	0.248047	0.316347	0.414183	0.496094	0.581634	0.728159	0.807797	0.992188	1.09917	1.24023	1.31506	1.48828	1.73633	1.98438	2.38745	2.82817	3.45489	4.74963	10.9843
0.0689344	0.187051	0.248047	0.316442	0.415934	0.496094	0.582639	0.728173	0.807875	0.992188	1.10286	1.24023	1.31645	1.48828	1.73633	1.98438	2.39559	2.82817	3.47266	4.7704	11.093
0.0689689	0.187051	0.248047	0.316558	0.417924	0.496094	0.583289	0.728816	0.80963	0.992188	1.10295	1.24023	1.31727	1.48828	1.73633	1.98438	2.40469	2.82817	3.47935	4.77128	11.1428
0.0689852	0.187059	0.248047	0.31721	0.420445	0.496094	0.584592	0.72914	0.810068	0.992188	1.10477	1.24023	1.31822	1.48828	1.73633	1.98438	2.40506	2.82817	3.48451	4.77242	11.1924
0.0690366	0.187313	0.248047	0.317701	0.420782	0.496094	0.586383	0.729483	0.810267	0.992188	1.10525	1.24023	1.32146	1.48828	1.73904	1.98438	2.41287	2.82817	3.49349	4.8162	11.2308
0.0690476	0.187398	0.248047	0.317888	0.42164	0.496094	0.587239	0.731145	0.812127	0.992188	1.1093	1.24023	1.32357	1.48828	1.74312	1.98616	2.41375	2.82817	3.50791	4.8162	11.2609
0.0691835	0.18742	0.248047	0.319304	0.421966	0.496094	0.587558	0.732388	0.812317	0.992188	1.1093	1.24023	1.32411	1.48828	1.74819	1.99982	2.41395	2.82817	3.50791	4.82673	11.3127
0.0692055	0.187516	0.248047	0.319631	0.421968	0.496094	0.588096	0.733625	0.812398	0.992188	1.1093	1.24023	1.33464	1.48828	1.74905	1.99982	2.41612	2.82817	3.50791	4.84227	11.3805
0.0692541	0.187633	0.248047	0.319752	0.422574	0.496094	0.590481	0.736296	0.812875	0.992188	1.1093	1.24023	1.33567	1.4901	1.74936	1.99982	2.41819	2.82817	3.50791	4.84954	11.3832
0.0693059	0.187814	0.248047	0.32045	0.422736	0.496094	0.59089	0.737429	0.812917	0.992188	1.1093	1.24023	1.33577	1.49218	1.75079	1.99982	2.42306	2.82817	3.50791	4.87247	11.4344
0.069318	0.18786	0.248047	0.320542	0.425403	0.496094	0.591342	0.738524	0.813564	0.992188	1.1093	1.24023	1.33577	1.49967	1.75396	1.99982	2.44298	2.82817	3.50791	4.87335	11.4532
0.0696676	0.188209	0.248047	0.320673	0.425451	0.496094	0.592055	0.739885	0.813637	0.992188	1.1093	1.24023	1.33577	1.50041	1.75396	1.99982	2.44298	2.82817	3.50791	4.87335	11.4532
0.0697263	0.188283	0.248047	0.320942	0.425938	0.496094	0.592813	0.741282	0.815235	0.992188	1.1093	1.24023	1.33577	1.50589	1.75396	1.99982	2.44298	2.82987	3.50791	4.87335	11.5308
0.0699502	0.188809	0.248047	0.321033	0.426244	0.496094	0.593168	0.742877	0.81574	0.992188	1.1093	1.24023	1.33577	1.50729	1.75396	1.99982	2.44298	2.8313	3.50791	4.89685	11.5415
0.070213	0.189209	0.248047	0.322829	0.426805	0.496094	0.594326	0.744141	0.815813	0.992188	1.1093	1.24023	1.33577	1.50881	1.75396	1.99982	2.44298	2.83377	3.50791	4.92359	11.6133
0.0702864	0.189412	0.248047	0.323029	0.427234	0.496094	0.594816	0.744141	0.821266	0.992188	1.1093	1.24023	1.33577	1.50881	1.75396	1.99982	2.45554	2.84116	3.50909	4.94134	11.6133
0.0703139	0.189618	0.248047	0.323065	0.42765	0.496094	0.595359	0.744141	0.821392	0.992188	1.1093	1.24023	1.33577	1.50881	1.75396	1.99982	2.45554	2.84542	3.51221	4.96094	11.6133
0.0703439	0.189832	0.248047	0.323315	0.428029	0.496094	0.595494	0.744141	0.823126	0.992188	1.1093	1.24023	1.33577	1.50881	1.75396	2.00106	2.46768	2.84871	3.52541	4.97945	11.7003
0.070372	0.190126	0.248047	0.323666	0.428104	0.496094	0.596082	0.744141	0.824831	0.992188	1.1093	1.24023	1.33577	1.50881	1.75396	2.00116	2.47	2.85216	3.52541	4.98436	11.7319
0.0703881	0.190375	0.248047	0.324001	0.42838	0.496094	0.596653	0.744141	0.825844	0.992188	1.1093	1.24023	1.33577	1.50881	1.75396	2.01057	2.48037	2.86449	3.52541	4.98568	11.7528
0.0704427	0.190795	0.248047	0.324105	0.428764	0.496094	0.597112	0.744141	0.82652	0.992188	1.1093	1.24023	1.33577	1.50881	1.75396	2.0106	2.48047	2.86676	3.52541	4.98846	11.7868
0.0705738	0.190818	0.248047	0.324496	0.42921	0.496094	0.59715	0.744141	0.827811	0.992188	1.1093	1.24023	1.33577	1.50881	1.75396	2.01491	2.48047	2.86828	3.54719	4.99185	11.8571
0.0705738	0.191189	0.248047	0.324788	0.429717	0.496094	0.59741	0.744141	0.828077	0.992188	1.1093	1.24023	1.33577	1.50881	1.75396	2.01505	2.48047	2.87011	3.55149	5.01644	11.87
0.0707401	0.191328	0.248047	0.325844	0.430329	0.496094	0.598191	0.744141	0.829345	0.992188	1.1093	1.24023	1.33577	1.50881	1.75396	2.02468	2.48047	2.87126	3.55732	5.01987	11.9321
0.0707956	0.191993	0.248047	0.326136	0.430494	0.496094	0.598825	0.744141	0.829496	0.992188	1.1093	1.24023	1.33577	1.50881	1.75396	2.03137	2.48047	2.88574	3.57859	5.02608	11.9732
0.0708174	0.192446	0.248047	0.327001	0.431268	0.496094	0.59925	0.744141	0.829602	0.992188	1.1093	1.24023	1.33577	1.50881	1.75396	2.03702	2.48047	2.8927	3.60276	5.03955	11.9989
0.0708895	0.192502	0.248047	0.327034	0.43221	0.496094	0.599655	0.744141	0.829891	0.992188	1.1093	1.24023	1.33577	1.50881	1.75396	2.03714	2.48047	2.8927	3.63653	5.11362	12.0705
0.071241	0.192591	0.248047	0.327047	0.432448	0.496094	0.600349	0.744141	0.830048	0.992188	1.1093	1.24023	1.33577	1.50881	1.75396	2.04545	2.48047	2.8927	3.63693	5.11362	12.1137
0.0714375	0.192722	0.248047	0.327324	0.432719	0.496094	0.60064	0.744141	0.8306	0.992188	1.1093	1.24023	1.33577	1.50881	1.75396	2.04545	2.48047	2.8927	3.66237	5.11362	12.1647
0.07151	0.192864	0.248047	0.327812	0.433309	0.496094	0.601817	0.744141	0.831017	0.992188	1.1093	1.24023	1.33577	1.50881	1.75396	2.04545	2.48047	2.89995	3.66237	5.16152	12.1771
0.0715451	0.193135	0.248047	0.328025	0.433534	0.496094	0.603222	0.744141	0.832585	0.992188	1.1093	1.24023	1.33577	1.51071	1.75396	2.04545	2.48047	2.90311	3.67977	5.21489	12.2727
0.0716633	0.19329	0.248047	0.328565	0.434065	0.496094	0.603933	0.744141	0.838273	0.992188	1.1093	1.24023	1.33577	1.51219	1.75396	2.05507	2.48047	2.90331	3.68748	5.23046	12.2727
0.0716785	0.193295	0.248047	0.328606	0.434193	0.496094	0.603991	0.744141	0.839464	0.992188	1.10967	1.24023	1.33577	1.51246	1.75396	2.06626	2.48047	2.91278	3.68748	5.24387	12.4048
0.0718113	0.193402	0.248047	0.329174	0.435239	0.496094	0.604371	0.744141	0.840031	0.992188	1.11323	1.24023	1.33577	1.51535	1.75396	2.07099	2.48047	2.91905	3.68748	5.25602	12.4048
0.07184	0.193439	0.248047	0.329224	0.436247	0.496094	0.605416	0.744141	0.840211	0.992188	1.11425	1.24023	1.33577	1.51611	1.75396	2.07436	2.48047	2.93822	3.68748	5.26187	12.4048
0.0719987	0.193701	0.248047	0.329557	0.437757	0.496094	0.605461	0.744141	0.841035	0.992188	1.11587	1.24023	1.33856	1.51656	1.75396	2.08582	2.48047	2.94186	3.68748	5.26187	12.4568
0.0721093	0.193735	0.248047	0.329775	0.438324	0.496094	0.606054	0.744141	0.841075	0.992188	1.11631	1.24023	1.33924	1.51821	1.75396	2.09488	2.48047	2.9423	3.68748	5.27301	12.4913
0.0723248	0.193965	0.248047	0.330747	0.439615	0.496094	0.606509	0.744141	0.841382	0.992188	1.11732	1.24023	1.33939	1.51859	1.75396	2.10475	2.49284	2.97656	3.68748	5.27355	12.5429
0.0723485	0.194494	0.248047	0.331614	0.439649	0.496094	0.606569	0.744141	0.847469	0.992188	1.11874	1.24023	1.34033	1.52016	1.75396	2.10475	2.49284	2.97773	3.68748	5.27355	12.648
0.0723485	0.194972	0.248047	0.332585	0.439756	0.496094	0.607247	0.744141	0.84836	0.992188	1.12182	1.24023	1.34059	1.52533	1.75396	2.10475	2.49284	2.98085	3.68748	5.28179	12.6528
0.0724315	0.195044	0.248047	0.333435	0.439807	0.496094	0.607857	0.744141	0.848869	0.992188	1.12418	1.24023	1.34086	1.53036	1.75396	2.10475	2.49284	2.98345	3.7207	5.31352	12.6528
0.072446	0.195199	0.248047	0.333682	0.441024	0.496094	0.607983	0.744141	0.849142	0.992188	1.12513	1.24023	1.34176	1.53724	1.75396	2.10475	2.49284	2.98454	3.7207	5.32579	12.9008
0.0725233	0.195912	0.248047	0.333905	0.442363	0.496094	0.608064	0.744141	0.853654	0.992188	1.12986	1.24023	1.34336	1.53808	1.75396	2.11724	2.49284	2.98688	3.72246	5.34309	12.9959
0.0725377	0.195936	0.248047	0.334096	0.442534	0.496094	0.609096	0.744141	0.85383	0.992188	1.13	1.24023	1.34384	1.53921	1.75396	2.11794	2.49284	2.98688	3.72896	5.362	13.1675
0.0726258	0.195955	0.248047	0.334178	0.442555	0.496094	0.609924	0.744141	0.854704	0.992188	1.13054	1.24023	1.34414	1.54441	1.75396	2.11876	2.49321	2.98688	3.75363	5.44009	13.2305
0.0727368	0.196235	0.248047	0.334866	0.442995	0.496094	0.609997	0.744141	0.855877	0.992188	1.1325	1.24023	1.3467	1.54482	1.75396	2.11931	2.49568	2.98688	3.77336	5.44574	13.3784
0.0727688	0.196293	0.248047	0.334915	0.443117	0.496925	0.611142	0.744141	0.856136	0.992188	1.1334	1.24023	1.35042	1.5477	1.75396	2.11931	2.51252	2.98688	3.77925	5.45703	13.4037
0.0727866	0.196538	0.248047	0.335112	0.4432	0.497386	0.613912	0.744141	0.856199	0.992188	1.13676	1.24023	1.35362	1.55471	1.75396	2.11931	2.51556	2.98688	3.78627	5.46267	13.5362
0.0728284	0.196591	0.248047	0.33535	0.443212	0.497826	0.615282	0.744141	0.856895	0.992188	1.13698	1.24023	1.35487	1.56098	1.75396	2.11931	2.52959	2.98688	3.78627	5.5465	13.7325
0.0728576	0.196822	0.248047	0.335993	0.443245	0.49791	0.615746	0.744141	0.857344	0.992188	1.13793	1.24023	1.36236	1.5634	1.75396	2.13378	2.52959	2.98688	3.78627	5.5465	13.8662
0.0729486	0.196961	0.248047	0.336107	0.44381	0.499151	0.616175	0.744141	0.863766	0.992188	1.13805	1.24023	1.36681	1.56379	1.75396	2.13378	2.52959	2.98688	3.85445	5.57416	14.0185
0.0731938	0.196986	0.248047	0.336619	0.445532	0.500137	0.616791	0.744141	0.865466	0.992188	1.13806	1.24023	1.3673	1.56879	1.75396	2.13378	2.52959	2.99129	3.86714	5.57416	14.5017
0.0732222	0.197149	0.248047	0.336653	0.445697	0.500145	0.617522	0.744141	0.865922	0.992188	1.13914	1.24023	1.3681	1.56879	1.75396	2.13378	2.52959	2.99716	3.86763	5.62361	14.7249
0.073229	0.197894	0.248047	0.337323	0.44579	0.500326	0.618013	0.744141	0.868531	0.992188	1.14034	1.24023	1.37125	1.56879	1.75396	2.13378	2.52959	2.99716	3.87462	5.65634	14.7361
0.0732818	0.198234	0.248047	0.337907	0.446181	0.500446	0.618533	0.744141	0.869022	0.992188	1.14049	1.24023	1.37582	1.56879	1.75396	2.13378	2.52959	3.00291	3.87462	5.66178	14.8435
0.073784	0.198915	0.248047	0.338363	0.446589	0.500696	0.621638	0.744141	0.874211	0.992188	1.14096	1.24023	1.37643	1.56879	1.75396	2.13378	2.54668	3.01762	3.87462	5.66721	15.231
0.0737877	0.199224	0.248047	0.339616	0.44677	0.501806	0.623767	0.744141	0.874489	0.992188	1.14383	1.24023	1.37817	1.5713	1.75396	2.13378	2.54716	3.01762	3.87462	5.71047	15.6589
0.0738105	0.199426	0.248047	0.339658	0.446914	0.501874	0.623988	0.744141	0.875282	0.992188	1.14525	1.24023	1.37847	1.57813	1.75396	2.13378	2.55138	3.02426	3.87526	5.71047	15.6977
0.0739189	0.199658	0.248047	0.339794	0.447361	0.502907	0.625033	0.744141	0.87548	0.992392	1.14763	1.24023	1.38443	1.58115	1.75396	2.13378	2.55238	3.0278	3.91147	5.71047	16.6395
0.0741018	0.200016	0.248047	0.340257	0.447555	0.5031	0.627327	0.744141	0.875911	0.997213	1.14996	1.24023	1.38491	1.58827	1.75396	2.13378	2.5538	3.0278	3.92197	5.72661	16.869
0.0741166	0.200017	0.248047	0.340522	0.447659	0.50337	0.628105	0.744141	0.876381	0.998197	1.15938	1.24023	1.3851	1.58827	1.75396	2.13378	2.5538	3.0278	3.92197	5.81192	19.0738
0.0743429	0.200361	0.248047	0.340632	0.448762	0.504193	0.631487	0.744141	0.87716	0.998709	1.16068	1.24023	1.38575	1.58827	1.75396	2.13378	2.5538	3.0278	3.92197	5.81192	22.019
0.0746126	0.200687	0.248047	0.341045	0.44937	0.505278	0.631606	0.744141	0.881237	0.999368	1.16264	1.24023	1.38614	1.58827	1.75396	2.13378	2.5538	3.0278	3.92197	5.83833	24.3756
0.0746519	0.201545	0.248047	0.341537	0.451882	0.505282	0.632541	0.744141	0.882104	0.999509	1.16682	1.24023	1.38786	1.58827	1.75396	2.13378	2.5538	3.0278	3.92197	5.89601	63.3006
0.074672	0.201664	0.248047	0.342364	0.452211	0.505293	0.634353	0.744141	0.882281	1.00017	1.16725	1.24023	1.38932	1.58827	1.75396	2.13378	2.5538	3.0278	3.92197	5.91684
0.0746823	0.201901	0.248047	0.34297	0.453778	0.505806	0.634849	0.744141	0.892051	1.00088	1.16734	1.24023	1.38941	1.58827	1.75396	2.13378	2.5538	3.0278	3.95735	5.95312
0.0747675	0.202523	0.248047	0.343023	0.454861	0.506619	0.636428	0.744141	0.892317	1.00181	1.17262	1.24023	1.39355	1.58827	1.75396	2.13378	2.5538	3.02903	3.96875	5.97376
0.0748063	0.202681	0.248047	0.343114	0.455202	0.507865	0.636782	0.744141	0.893171	1.00346	1.17469	1.24023	1.39779	1.58827	1.75396	2.13378	2.5538	3.05009	3.97024	6.00458
0.0748778	0.202727	0.248047	0.343765	0.455253	0.50803	0.639539	0.744141	0.893982	1.00486	1.17525	1.24023	1.39938	1.58827	1.75396	2.13378	2.5538	3.05681	3.97221	6.00458
0.0750794	0.202913	0.248047	0.343767	0.455335	0.509518	0.639995	0.744141	0.894346	1.01107	1.1754	1.24023	1.40103	1.58827	1.75539	2.13468	2.5538	3.06063	3.98741	6.00458
0.0751878	0.203283	0.248047	0.344298	0.455477	0.510504	0.641114	0.744141	0.894346	1.01202	1.17735	1.24023	1.40138	1.58827	1.776	2.14253	2.5538	3.083	3.98955	6.08094
0.0752057	0.203368	0.248047	0.344473	0.455665	0.51074	0.641416	0.744141	0.894346	1.01329	1.18287	1.24023	1.40317	1.58827	1.78006	2.15646	2.5538	3.09681	3.99201	6.13634
0.0752118	0.203521	0.248047	0.344888	0.456067	0.510889	0.641673	0.744141	0.894346	1.01351	1.18507	1.24023	1.40317	1.58827	1.78462	2.18151	2.5538	3.10342	3.9935	6.16136
0.0752194	0.204098	0.248047	0.344898	0.456192	0.510949	0.642656	0.744141	0.894346	1.01379	1.18713	1.24023	1.40317	1.58827	1.78869	2.19067	2.5538	3.10802	4.00732	6.20117
0.0753174	0.204333	0.248047	0.345016	0.456974	0.511174	0.642913	0.744141	0.894346	1.01652	1.18846	1.24023	1.40317	1.58827	1.78869	2.19186	2.5538	3.10802	4.02493	6.20117
0.0754252	0.204615	0.248047	0.345153	0.457274	0.512168	0.643113	0.744141	0.894346	1.0189	1.19022	1.24023	1.40317	1.58827	1.78869	2.1939	2.5538	3.13379	4.03487	6.21604
0.0755001	0.204727	0.248047	0.346864	0.457529	0.513391	0.643359	0.744141	0.894346	1.01952	1.19194	1.24023	1.40317	1.58827	1.78869	2.19802	2.5538	3.13757	4.03791	6.22098
0.0755774	0.205133	0.248047	0.346937	0.457687	0.51413	0.645095	0.744141	0.894346	1.02102	1.19281	1.24023	1.40317	1.58827	1.78869	2.20184	2.55744	3.15349	4.03791	6.22098
0.0756744	0.205402	0.248047	0.347654	0.458202	0.514204	0.646684	0.744141	0.894346	1.0222	1.19401	1.24023	1.40317	1.58827	1.78869	2.20345	2.56139	3.15712	4.05919	6.32398
0.0757711	0.205676	0.248047	0.347763	0.458599	0.514312	0.648363	0.744141	0.894346	1.02241	1.19432	1.24023	1.40317	1.58827	1.78869	2.20784	2.57032	3.15712	4.06827	6.44922
0.0762864	0.205786	0.248047	0.347923	0.458922	0.516478	0.648621	0.744141	0.894346	1.02272	1.19783	1.24023	1.40317	1.58827	1.78869	2.21688	2.58769	3.15712	4.06827	6.44922
0.0766105	0.205842	0.248047	0.348199	0.459246	0.517979	0.648655	0.744141	0.894346	1.02272	1.19971	1.24023	1.40317	1.58827	1.78869	2.21709	2.58969	3.15712	4.08423	6.46827
0.0766975	0.206059	0.248047	0.348239	0.459831	0.518554	0.649155	0.744141	0.894346	1.02272	1.20004	1.24023	1.40317	1.58827	1.78869	2.21836	2.58969	3.15712	4.0847	6.49201
0.0767169	0.206214	0.248047	0.349171	0.46023	0.518901	0.649934	0.744141	0.894346	1.02272	1.20077	1.24023	1.40317	1.58827	1.78869	2.2186	2.58969	3.15712	4.09089	6.56739
0.076773	0.206424	0.248047	0.349219	0.460335	0.519491	0.650309	0.744141	0.894346	1.02272	1.20213	1.24023	1.40317	1.58827	1.79158	2.2186	2.58969	3.15712	4.10098	6.6558
0.0768283	0.206593	0.248047	0.349222	0.461316	0.519512	0.650764	0.744141	0.894346	1.02272	1.20217	1.24023	1.40317	1.58827	1.79771	2.2186	2.58969	3.17133	4.10591	6.67426
0.0768526	0.206893	0.248047	0.349245	0.461728	0.520012	0.650797	0.744141	0.894346	1.02272	1.20342	1.24023	1.40317	1.58827	1.79785	2.2186	2.5902	3.17315	4.10959	6.67426
0.0769882	0.207725	0.248047	0.350791	0.46193	0.520312	0.651881	0.744141	0.894346	1.02272	1.20869	1.24023	1.40317	1.58827	1.79833	2.21966	2.61403	3.17655	4.1268	6.67887
0.0771519	0.207867	0.248047	0.350791	0.463353	0.521563	0.652273	0.744141	0.894346	1.02272	1.2115	1.24023	1.40317	1.58827	1.80424	2.23145	2.6145	3.17655	4.12712	6.69727
0.0771527	0.20787	0.248047	0.350791	0.463436	0.521908	0.653337	0.744141	0.894346	1.02272	1.21166	1.24023	1.40317	1.58827	1.8057	2.23242	2.6164	3.17655	4.12832	6.86064
0.0773373	0.207916	0.248047	0.350791	0.464559	0.522113	0.653479	0.744141	0.894346	1.02272	1.2122	1.24023	1.40317	1.58827	1.80581	2.23242	2.63167	3.17655	4.15798	6.94531
0.0774854	0.208183	0.248047	0.350791	0.464563	0.522157	0.654112	0.744141	0.894346	1.02272	1.21238	1.24023	1.40317	1.58827	1.80581	2.23242	2.63361	3.18957	4.15802	6.94974
0.0776019	0.208275	0.248047	0.350791	0.465096	0.522758	0.654974	0.744141	0.894346	1.02272	1.21465	1.24023	1.40485	1.58827	1.80739	2.23242	2.63677	3.19704	4.15978	7.01583
0.0776361	0.208582	0.248047	0.350791	0.466558	0.5248	0.655433	0.744141	0.894346	1.02272	1.21861	1.24023	1.405	1.58827	1.81177	2.23242	2.63677	3.20112	4.16671	7.09431
0.0776589	0.208703	0.248047	0.350791	0.466833	0.524928	0.655508	0.744141	0.894346	1.02272	1.22113	1.24023	1.41481	1.58827	1.82829	2.23242	2.63677	3.21177	4.17145	7.19763
0.077671	0.208968	0.248047	0.350791	0.46693	0.526711	0.656734	0.744141	0.894346	1.02272	1.22441	1.24023	1.41825	1.58827	1.83463	2.23242	2.63677	3.21401	4.2168	7.23175
0.0777222	0.209078	0.248047	0.350791	0.467197	0.526974	0.657316	0.744141	0.894346	1.02272	1.22552	1.24023	1.41975	1.58827	1.84069	2.23242	2.63677	3.21479	4.22409	7.32474
0.0778058	0.209113	0.248047	0.350791	0.46732	0.527513	0.65767	0.744141	0.894346	1.02272	1.22634	1.24023	1.42056	1.58827	1.8483	2.23242	2.63677	3.22461	4.22409	7.39995
0.0778245	0.209148	0.248047	0.350791	0.468518	0.528218	0.658944	0.744141	0.894346	1.02272	1.22882	1.24023	1.42231	1.58827	1.85204	2.23242	2.63677	3.22461	4.22746	7.44554
0.0779282	0.209818	0.248047	0.350791	0.46916	0.530827	0.658955	0.744141	0.894346	1.02272	1.22936	1.24023	1.42293	1.58827	1.86884	2.23242	2.63677	3.22461	4.23028	7.49906
0.0780632	0.210402	0.248047	0.350791	0.46932	0.532265	0.659682	0.744141	0.894641	1.02272	1.23111	1.24023	1.42366	1.58827	1.87314	2.23242	2.6416	3.22461	4.24588	7.50726
0.0783969	0.210528	0.248047	0.350791	0.47147	0.532311	0.661303	0.744141	0.89469	1.02272	1.23331	1.24023	1.42367	1.58827	1.87483	2.23242	2.64579	3.22583	4.24588	7.56035
0.0785053	0.211344	0.248047	0.350791	0.472295	0.533249	0.663505	0.744141	0.895419	1.02272	1.23382	1.24023	1.42414	1.58827	1.87498	2.23441	2.65566	3.23414	4.25619	7.56035
0.0785053	0.211422	0.248047	0.350791	0.472295	0.533976	0.664729	0.744141	0.89719	1.02272	1.23523	1.24023	1.42434	1.58827	1.87686	2.23502	2.65891	3.23414	4.26756	7.60902
0.0785902	0.211898	0.248047	0.350791	0.472295	0.535937	0.66584	0.744141	0.8974	1.02272	1.2374	1.24023	1.42762	1.58827	1.88508	2.23577	2.66252	3.23451	4.27361	7.69345
0.0786494	0.212181	0.248047	0.350791	0.472295	0.537526	0.666483	0.744141	0.897428	1.02272	1.24023	1.24023	1.43127	1.58827	1.88555	2.23611	2.66975	3.24132	4.27404	7.78883
0.0787925	0.212674	0.248047	0.350791	0.47324	0.537575	0.666543	0.747081	0.898762	1.02272	1.24023	1.24186	1.43169	1.58827	1.88907	2.24018	2.67104	3.25091	4.28195	7.87915
0.0787931	0.21312	0.248047	0.350791	0.47327	0.538001	0.667311	0.747402	0.90074	1.02272	1.24023	1.24426	1.43575	1.58827	1.88907	2.24616	2.67155	3.2603	4.28195	7.89475
0.0791273	0.213197	0.248047	0.350791	0.474516	0.538322	0.667947	0.747647	0.901284	1.02272	1.24023	1.24532	1.43634	1.58827	1.88907	2.24616	2.67155	3.26224	4.28286	7.95299
0.0794997	0.2139	0.248047	0.350791	0.474898	0.538643	0.668048	0.748155	0.901776	1.02272	1.24023	1.24679	1.43699	1.58827	1.88907	2.24616	2.67155	3.26255	4.29217	8.31975
0.079503	0.215028	0.248047	0.350791	0.474974	0.538987	0.669024	0.749015	0.904298	1.02272	1.24023	1.24753	1.44103	1.58827	1.88907	2.24616	2.67155	3.27944	4.30926	8.33821
0.0795395	0.215039	0.248047	0.350791	0.475334	0.539324	0.669342	0.749606	0.904585	1.02272	1.24023	1.24755	1.44362	1.58827	1.89922	2.24616	2.67155	3.2912	4.3228	8.36768
0.0795918	0.215201	0.248047	0.350791	0.475413	0.539363	0.669399	0.75201	0.90538	1.02272	1.24023	1.24831	1.44447	1.58827	1.89951	2.24616	2.67155	3.29644	4.3253	8.39337
0.0797047	0.215506	0.248047	0.350791	0.475904	0.541616	0.669582	0.753752	0.905612	1.02272	1.24023	1.25025	1.44456	1.58827	1.90326	2.24616	2.67155	3.29699	4.33195	8.42264
0.0798173	0.215507	0.248047	0.350791	0.476351	0.541705	0.669943	0.754072	0.907476	1.02489	1.24023	1.25266	1.44635	1.58827	1.90476	2.24735	2.67199	3.3279	4.33195	8.42264
0.0798838	0.21554	0.248047	0.350791	0.478018	0.541832	0.671157	0.756427	0.907926	1.02563	1.24023	1.25465	1.44635	1.58827	1.91257	2.25358	2.67704	3.3279	4.33195	8.49176
0.0799951	0.215844	0.248047	0.350791	0.478021	0.542216	0.672311	0.756534	0.908166	1.02583	1.24023	1.25574	1.44635	1.58827	1.91996	2.25955	2.68304	3.33344	4.33757	8.54233
0.0800716	0.216545	0.248047	0.350791	0.478573	0.542451	0.672507	0.756911	0.90833	1.02936	1.24023	1.25742	1.44635	1.58827	1.93542	2.26341	2.68304	3.33713	4.37949	8.6781
0.0801097	0.216645	0.248047	0.350791	0.478594	0.543654	0.673524	0.757453	0.910633	1.03146	1.24023	1.25789	1.44635	1.58827	1.93626	2.28243	2.68304	3.33713	4.3884	8.70994
0.0802236	0.21672	0.248047	0.350791	0.47875	0.544961	0.673735	0.758256	0.91123	1.03167	1.24023	1.25792	1.44635	1.58827	1.93731	2.28547	2.68304	3.33713	4.3954	8.71347
0.0803343	0.216927	0.248047	0.350791	0.478936	0.545596	0.674188	0.759188	0.911339	1.03234	1.24023	1.26403	1.44635	1.59049	1.93731	2.28688	2.68304	3.33713	4.3954	9.14752
0.0803697	0.217116	0.248047	0.350791	0.478983	0.545607	0.676396	0.75928	0.912141	1.03319	1.24023	1.2648	1.44635	1.59823	1.93731	2.28688	2.68772	3.33713	4.3954	9.32406
0.0805005	0.218057	0.248047	0.350791	0.479073	0.546065	0.676949	0.761168	0.912473	1.03327	1.24023	1.2648	1.44635	1.59931	1.93731	2.28688	2.70627	3.33713	4.41635	9.33724
0.0806152	0.218603	0.248047	0.350791	0.479496	0.547262	0.677154	0.761215	0.913362	1.03363	1.24023	1.2648	1.44635	1.59948	1.93731	2.28688	2.709	3.33713	4.4361	9.34054
0.0806817	0.218767	0.248047	0.350791	0.479582	0.547277	0.67735	0.766377	0.913403	1.03472	1.24023	1.2648	1.44635	1.60401	1.93731	2.28688	2.70993	3.33713	4.44144	9.42208
0.0808424	0.218821	0.248047	0.350791	0.48054	0.547499	0.678501	0.767163	0.914737	1.03562	1.24023	1.2648	1.44635	1.6181	1.93731	2.28688	2.71074	3.33713	4.47173	9.43218
0.0808534	0.218838	0.248047	0.350791	0.480966	0.547843	0.678756	0.767761	0.915824	1.03651	1.24023	1.2648	1.44635	1.62155	1.93731	2.28688	2.71211	3.33713	4.47767	9.50703
0.081345	0.219134	0.248047	0.350791	0.482844	0.549026	0.678897	0.768258	0.916029	1.03741	1.24023	1.2648	1.44635	1.64922	1.93731	2.28841	2.72521	3.33713	4.50681	9.52965
0.0815668	0.219717	0.248047	0.350791	0.484147	0.550944	0.680404	0.768417	0.918384	1.04232	1.24023	1.2648	1.44635	1.65216	1.93731	2.30749	2.72852	3.33713	4.52643	9.52965
0.0815793	0.220135	0.248047	0.350791	0.486091	0.552886	0.681042	0.769076	0.920804	1.04291	1.24023	1.2648	1.44635	1.65425	1.93731	2.31068	2.72975	3.33713	4.53776	9.57152
0.08158	0.220267	0.248047	0.350791	0.487874	0.553314	0.681127	0.769499	0.92173	1.04312	1.24023	1.2648	1.44635	1.65462	1.93731	2.31134	2.73411	3.33898	4.5566	9.58437
0.0816151	0.220694	0.248047	0.350791	0.488018	0.553353	0.681715	0.770106	0.922358	1.04429	1.24023	1.2648	1.44635	1.65872	1.93731	2.31362	2.73977	3.34163	4.56029	9.6324
0.0816344	0.220783	0.248047	0.350791	0.488451	0.553569	0.681787	0.77226	0.922785	1.0448	1.24023	1.2648	1.44635	1.66395	1.93731	2.31482	2.73977	3.36168	4.56029	9.76246
0.0816377	0.220837	0.248047	0.350791	0.488462	0.55465	0.682142	0.774617	0.923188	1.04499	1.24023	1.2648	1.44635	1.66395	1.93731	2.31759	2.74817	3.3738	4.56029	9.77506
0.0816396	0.220895	0.248047	0.350791	0.488776	0.55465	0.682222	0.774889	0.923555	1.04699	1.24023	1.2648	1.44635	1.66395	1.93731	2.34007	2.75476	3.3738	4.58875	9.83692
0.0817346	0.221007	0.248047	0.350791	0.488822	0.55465	0.682701	0.775653	0.923572	1.05237	1.24023	1.2648	1.44635	1.66395	1.93731	2.34007	2.77325	3.3738	4.6339	9.87526
0.0818323	0.221047	0.248047	0.350791	0.490219	0.55465	0.683351	0.775912	0.926753	1.05237	1.24023	1.2648	1.44635	1.66395	1.93731	2.34007	2.77325	3.3738	4.6357	9.87837
0.0819989	0.221141	0.248047	0.350791	0.490373	0.55465	0.683919	0.776097	0.930231	1.05237	1.24023	1.2648	1.44635	1.66395	1.93731	2.34007	2.77325	3.3738	4.66945	9.90325
0.0820465	0.221272	0.248047	0.350791	0.490836	0.55465	0.684302	0.776604	0.933004	1.05237	1.24023	1.2648	1.44635	1.66395	1.93731	2.34007	2.77325	3.3738	4.67594	9.91437
0.0822089	0.221557	0.248047	0.350791	0.491652	0.55465	0.684943	0.777118	0.933657	1.05237	1.24023	1.2648	1.44635	1.66965	1.93731	2.34007	2.77325	3.3738	4.71116	9.92807
0.0822992	0.221648	0.248047	0.350791	0.492011	0.55465	0.68745	0.777731	0.9375	1.05237	1.24023	1.2648	1.44635	1.67798	1.93731	2.34007	2.77325	3.40693	4.71941	9.98612
0.0823291	0.222635	0.248047	0.350791	0.492302	0.55465	0.687701	0.779303	0.937954	1.05237	1.24023	1.2648	1.44635	1.67849	1.93731	2.34007	2.77325	3.40751	4.71941	10.0513
0.0826115	0.223106	0.248047	0.350791	0.492712	0.55465	0.687739	0.779352	0.939992	1.05237	1.24023	1.2648	1.44635	1.68017	1.93731	2.34007	2.77325	3.41006	4.73893	10.1001
0.0826489	0.223291	0.248047	0.350791	0.493538	0.55465	0.689924	0.781351	0.942172	1.05237	1.24023	1.2648	1.44635	1.68126	1.94701	2.34007	2.77325	3.45489	4.74147	10.1244
0.0826742	0.223313	0.248047	0.350791	0.494291	0.55465	0.690073	0.782116	0.942383	1.05237	1.24023	1.2648	1.44635	1.68336	1.96196	2.34007	2.77325	3.45489	4.74698	10.2152
0.0826749	0.223636	0.248047	0.350791	0.49472	0.55465	0.690471	0.782307	0.944291	1.05237	1.24023	1.2648	1.44641	1.69244	1.96818	2.34007	2.77325	3.45489	4.75344	10.3379
0.0827946	0.223735	0.248047	0.350791	0.494796	0.55465	0.692985	0.78339	0.944677	1.05237	1.24023	1.2648	1.45351	1.69297	1.97595	2.34007	2.77325	3.45489	4.76482	10.3884
0.0829757	0.224043	0.248047	0.350791	0.494815	0.55465	0.694179	0.783428	0.945739	1.05237	1.24023	1.2648	1.46035	1.70505	1.98438	2.34007	2.77325	3.45489	4.77041	10.4121
0.0833564	0.224086	0.248047	0.350791	0.495267	0.55465	0.694455	0.784211	0.946393	1.05237	1.24023	1.2648	1.46088	1.73216	1.98438	2.34007	2.77325	3.45489	4.77128	10.4121
0.083477	0.22409	0.248047	0.350791	0.495853	0.55465	0.694602	0.784393	0.950691	1.05237	1.24023	1.26502	1.46221	1.73545	1.98438	2.34461	2.77325	3.45896	4.77128	10.4121
0.0834789	0.224352	0.248047	0.350791	0.496094	0.55465	0.695008	0.784393	0.950716	1.05237	1.24023	1.26891	1.46335	1.73633	1.98438	2.34565	2.77325	3.4815	4.78204	10.4298
0.083607	0.224457	0.248047	0.350791	0.496094	0.55465	0.696009	0.784393	0.951832	1.05237	1.24023	1.27602	1.46713	1.73633	1.98438	2.34703	2.77325	3.48354	4.80362	10.4298
0.083755	0.224921	0.248047	0.350791	0.496094	0.55465	0.696964	0.784393	0.952957	1.05237	1.24023	1.27671	1.46761	1.73633	1.98438	2.34969	2.77325	3.49798	4.8162	10.4563
0.083954	0.225789	0.248047	0.350791	0.496094	0.55465	0.698097	0.784393	0.954636	1.05237	1.24023	1.27714	1.47234	1.73633	1.98438	2.35027	2.77325	3.50072	4.8162	10.6169
0.0840254	0.226054	0.248047	0.350791	0.496094	0.55465	0.699578	0.784393	0.95565	1.05237	1.24023	1.27783	1.47565	1.73633	1.98438	2.35206	2.77325	3.50167	4.84598	10.6516
0.0842719	0.226477	0.248047	0.350791	0.496094	0.55465	0.701583	0.784393	0.956019	1.05237	1.24023	1.27791	1.47662	1.73633	1.98438	2.35318	2.78113	3.50791	4.85606	10.6545
0.0842835	0.226863	0.248505	0.350791	0.496094	0.55465	0.701583	0.784393	0.957502	1.05237	1.24023	1.27869	1.47953	1.73633	1.98438	2.35318	2.7827	3.50791	4.8565	10.6545
0.0843488	0.227138	0.249091	0.350791	0.496094	0.55465	0.701583	0.784393	0.960686	1.05237	1.24023	1.27951	1.48169	1.73633	1.98438	2.35318	2.79165	3.50791	4.86895	10.7925
0.084433	0.227362	0.249266	0.350791	0.496094	0.55465	0.701583	0.784393	0.961862	1.05237	1.24023	1.28003	1.48525	1.73633	1.98438	2.35318	2.79936	3.50791	4.86991	10.815
0.0845262	0.22764	0.249317	0.350791	0.496094	0.55465	0.701583	0.784393	0.962814	1.05237	1.24023	1.28205	1.48682	1.73633	1.98866	2.35318	2.80131	3.50791	4.87335	10.9506
0.0846691	0.227764	0.249688	0.350791	0.496094	0.55465	0.701583	0.784393	0.962946	1.0559	1.24023	1.28578	1.48828	1.73633	1.99982	2.35318	2.80633	3.50791	4.87335	11.0095
0.0848982	0.228522	0.250061	0.350791	0.496094	0.55465	0.701583	0.784393	0.965636	1.05759	1.24023	1.28751	1.48828	1.73633	1.99982	2.35318	2.80633	3.50791	4.89225	11.093
0.0850638	0.228748	0.251312	0.350791	0.496094	0.55465	0.701583	0.784393	0.967989	1.05897	1.24023	1.29212	1.48828	1.73633	1.99982	2.36307	2.80633	3.50791	4.907	11.093
0.0850768	0.229306	0.251315	0.350791	0.496094	0.55465	0.701583	0.784393	0.968874	1.05911	1.24023	1.29432	1.48828	1.73633	1.99982	2.37413	2.80633	3.50791	4.92359	11.1483
0.085147	0.229374	0.251403	0.350791	0.496094	0.55465	0.701583	0.784393	0.969113	1.06285	1.24023	1.29659	1.48828	1.73633	1.99982	2.38336	2.81844	3.50791	4.9423	11.1924
0.0851676	0.229382	0.251433	0.350791	0.496094	0.55465	0.701583	0.784393	0.969722	1.06298	1.24023	1.29719	1.48828	1.74614	1.99982	2.39804	2.82559	3.50791	4.96094	11.2963
0.0855784	0.229505	0.25208	0.350791	0.496094	0.55465	0.701583	0.784393	0.974003	1.06388	1.24023	1.29891	1.48828	1.75396	1.99982	2.40051	2.82769	3.50791	4.96094	11.3832
0.0858232	0.229731	0.2522	0.350791	0.496094	0.55465	0.701583	0.784393	0.974717	1.06977	1.24023	1.30447	1.48828	1.75396	1.99982	2.41089	2.82817	3.50791	4.96714	11.4344
0.0859468	0.229756	0.252293	0.350791	0.496094	0.55465	0.701583	0.784393	0.974817	1.07224	1.24023	1.31138	1.48828	1.75396	1.99982	2.41112	2.82817	3.51499	4.96987	11.5068
0.0860313	0.230489	0.252439	0.350791	0.496094	0.55465	0.701583	0.784393	0.978452	1.07332	1.24023	1.31214	1.48828	1.75396	1.99982	2.42336	2.82817	3.51713	4.98568	11.5068
0.0861731	0.230769	0.252645	0.350791	0.496094	0.55465	0.701583	0.784393	0.981314	1.07332	1.24023	1.31302	1.48828	1.75396	1.99982	2.42461	2.82817	3.55149	4.99185	11.5308
0.0861992	0.230822	0.252755	0.350791	0.496094	0.55465	0.701583	0.784393	0.983485	1.07456	1.24023	1.31402	1.48828	1.75396	1.99982	2.42499	2.82817	3.57438	4.99185	11.5415
0.0862822	0.231213	0.252984	0.350791	0.496094	0.55465	0.701583	0.784393	0.98511	1.07503	1.24023	1.31863	1.48828	1.75396	1.99982	2.43838	2.82817	3.58983	5.01644	11.5522
0.0863624	0.231325	0.253144	0.350963	0.496094	0.55465	0.701583	0.784393	0.988204	1.07762	1.24023	1.32182	1.48828	1.75396	1.99982	2.44298	2.82817	3.62064	5.01804	11.6767
0.0863624	0.231327	0.253184	0.351095	0.496094	0.55465	0.701583	0.784393	0.988355	1.07968	1.24023	1.32555	1.48828	1.75396	1.99982	2.44298	2.82817	3.63759	5.04103	11.8259
0.0865631	0.231804	0.253223	0.351304	0.496094	0.55465	0.701583	0.784393	0.990223	1.08312	1.24023	1.32559	1.48828	1.75396	1.99982	2.44298	2.83031	3.65534	5.06143	11.87
0.0867322	0.232988	0.253822	0.351349	0.496094	0.55465	0.701583	0.784393	0.992188	1.0844	1.24023	1.33227	1.48828	1.75396	1.99982	2.44298	2.84835	3.65833	5.0895	11.9166
0.0868895	0.232989	0.254073	0.351578	0.496094	0.55465	0.701583	0.784393	0.992188	1.08465	1.24023	1.33465	1.48828	1.75396	1.99982	2.44298	2.85264	3.66237	5.11868	11.9269
0.0869426	0.233707	0.254141	0.351632	0.496094	0.55465	0.701583	0.784393	0.992188	1.0872	1.24023	1.33506	1.4951	1.75396	1.99982	2.44438	2.85498	3.66952	5.12588	11.9707
0.0869426	0.233747	0.254146	0.351664	0.496094	0.55465	0.701583	0.784393	0.992188	1.08911	1.24023	1.33577	1.49937	1.75396	1.99982	2.45554	2.87357	3.68748	5.12675	11.9989
0.0870049	0.233758	0.254778	0.351724	0.496094	0.55465	0.701583	0.784393	0.992188	1.09209	1.24023	1.33577	1.50187	1.75396	2.00248	2.45554	2.87964	3.68748	5.16152	12.1137
0.0870659	0.234296	0.254974	0.351746	0.496094	0.55465	0.701583	0.784393	0.992188	1.09489	1.24023	1.33577	1.50881	1.75396	2.01423	2.45554	2.88686	3.68748	5.17937	12.1314
0.087166	0.23432	0.255619	0.351819	0.496094	0.55465	0.702355	0.784393	0.992188	1.09511	1.24023	1.33577	1.50881	1.75396	2.01783	2.45554	2.8927	3.68748	5.17937	12.1619
0.0874242	0.234787	0.256336	0.352197	0.496094	0.55465	0.704076	0.784393	0.992188	1.09529	1.24023	1.33577	1.50881	1.75396	2.02255	2.45554	2.8927	3.68748	5.21489	12.1644
0.0874387	0.235458	0.256582	0.35277	0.496094	0.55465	0.704185	0.784393	0.992188	1.09683	1.24023	1.33577	1.50881	1.75396	2.0258	2.45554	2.8927	3.68748	5.21489	12.2451
0.087607	0.23558	0.256638	0.352834	0.496094	0.55465	0.70438	0.784393	0.992188	1.09711	1.24023	1.33577	1.50881	1.75396	2.03366	2.45554	2.8927	3.7144	5.23255	12.2727
0.0876856	0.235898	0.257137	0.353214	0.496094	0.55465	0.704734	0.784393	0.992188	1.09763	1.24023	1.33577	1.50881	1.75396	2.04545	2.45554	2.90331	3.7207	5.23255	12.2727
0.0878415	0.235921	0.257185	0.353319	0.496094	0.55465	0.705124	0.784393	0.992188	1.0989	1.24023	1.33577	1.50881	1.75396	2.04545	2.45625	2.90331	3.7207	5.32579	12.2777
0.0878868	0.235992	0.257208	0.353593	0.496094	0.55465	0.705804	0.784669	0.992188	1.09907	1.24023	1.33577	1.50881	1.75396	2.04545	2.45795	2.90331	3.72934	5.34309	12.3576
0.0880221	0.23616	0.257444	0.354944	0.496094	0.55465	0.707304	0.785054	0.992188	1.09922	1.24023	1.33577	1.50881	1.75396	2.04545	2.46799	2.9148	3.73555	5.41743	12.4048
0.0882373	0.23639	0.257768	0.354976	0.496094	0.55465	0.707901	0.786069	0.992188	1.10205	1.24023	1.33577	1.50881	1.75396	2.04545	2.468	2.91765	3.75561	5.44009	12.4246
0.08841	0.236607	0.258028	0.355386	0.496094	0.55465	0.708131	0.789407	0.992188	1.10286	1.24023	1.33577	1.50881	1.75396	2.04545	2.47921	2.92678	3.76717	5.44009	12.4321
0.0884249	0.236739	0.258351	0.355411	0.496094	0.55465	0.708747	0.78986	0.992188	1.10304	1.24023	1.33577	1.51145	1.75396	2.04816	2.48047	2.93214	3.77814	5.44574	12.442
0.0885776	0.236895	0.259086	0.355817	0.496094	0.55465	0.710082	0.791259	0.992188	1.10472	1.24023	1.33577	1.52193	1.75396	2.05052	2.48047	2.9553	3.78627	5.46267	12.442
0.0886449	0.236979	0.259142	0.356031	0.496094	0.55465	0.711145	0.791967	0.992188	1.10703	1.24023	1.33577	1.53223	1.75396	2.05064	2.48047	2.96	3.79543	5.47953	12.4741
0.088669	0.237059	0.259402	0.356329	0.496094	0.55465	0.712713	0.793948	0.992188	1.1074	1.24023	1.33577	1.53408	1.75396	2.05692	2.48047	2.96295	3.79984	5.50753	12.5601
0.0887444	0.237763	0.25979	0.357727	0.496094	0.55465	0.713245	0.795721	0.992188	1.10858	1.24023	1.33577	1.5386	1.75396	2.05947	2.48047	2.97656	3.81935	5.50753	12.7376
0.0887873	0.238789	0.260676	0.357854	0.496094	0.55465	0.713879	0.795721	0.992188	1.1093	1.24023	1.33577	1.54316	1.75396	2.0633	2.48047	2.98688	3.82467	5.50753	12.8147
0.0889279	0.23885	0.260734	0.358506	0.496094	0.55465	0.715083	0.795847	0.992188	1.1093	1.24023	1.33577	1.5644	1.75396	2.0701	2.48047	2.98688	3.85072	5.50753	12.8913
0.0891998	0.238963	0.260919	0.358678	0.496094	0.55465	0.718424	0.797756	0.992188	1.1093	1.24023	1.33577	1.56879	1.75396	2.07181	2.48047	2.98688	3.85677	5.5465	12.9008
0.0892325	0.239242	0.261097	0.358837	0.496094	0.55465	0.718873	0.797914	0.992188	1.1093	1.24023	1.33577	1.56879	1.75396	2.07303	2.48047	2.98688	3.8587	5.57416	12.9413
0.0892619	0.239701	0.261536	0.359183	0.496094	0.55465	0.7207	0.799055	0.992188	1.1093	1.24023	1.33577	1.56879	1.75396	2.07741	2.48047	2.98688	3.86039	5.57416	12.9959
0.0894628	0.239814	0.261576	0.359982	0.496094	0.55465	0.72169	0.79981	0.992188	1.1093	1.24023	1.33577	1.56879	1.75396	2.08079	2.48047	2.98688	3.86097	5.59619	13.1465
0.0895174	0.239955	0.261625	0.360269	0.496094	0.55465	0.727115	0.799984	0.992188	1.1093	1.24023	1.33577	1.56879	1.75396	2.0845	2.48047	2.98688	3.86288	5.61266	13.1558
0.0895192	0.240447	0.261659	0.360682	0.496094	0.55465	0.727373	0.80409	0.992188	1.1093	1.24023	1.33577	1.56879	1.75396	2.08801	2.48047	2.98688	3.87441	5.62361	13.1873
0.0896107	0.240455	0.261697	0.360692	0.496094	0.55465	0.727584	0.804847	0.992188	1.1093	1.24023	1.33577	1.56879	1.75396	2.09224	2.48047	2.98688	3.87462	5.66721	13.2954
0.0897692	0.240582	0.261952	0.360893	0.496094	0.55483	0.728468	0.805431	0.992188	1.1093	1.24023	1.33577	1.56879	1.75396	2.10282	2.48047	2.99716	3.87462	5.71047	13.5362
0.0897835	0.241066	0.262543	0.36106	0.496094	0.555606	0.728841	0.806267	0.992188	1.1093	1.24023	1.33577	1.56879	1.75396	2.10386	2.48981	2.99716	3.87462	5.71047	13.6223
0.0898078	0.241312	0.262571	0.361621	0.496094	0.556482	0.730781	0.807602	0.992188	1.1093	1.24023	1.33577	1.56879	1.75396	2.10405	2.49037	2.99716	3.8801	5.7854	13.7772
0.0898464	0.24199	0.262894	0.362493	0.496094	0.556604	0.731497	0.807831	0.992188	1.1093	1.24023	1.3359	1.56879	1.75396	2.10475	2.49284	2.99716	3.88255	5.81192	14.0911
0.0899019	0.242571	0.263068	0.362869	0.496094	0.557117	0.733554	0.809458	0.992188	1.1093	1.24023	1.33602	1.56879	1.75396	2.10475	2.49284	2.99716	3.8904	5.81192	14.1561
0.0901087	0.242733	0.263332	0.362871	0.496094	0.557139	0.733855	0.813039	0.992188	1.1093	1.24023	1.33771	1.56879	1.75396	2.10475	2.49284	2.99927	3.89868	5.81192	14.1995
0.0901234	0.242821	0.263461	0.363364	0.496094	0.557279	0.734073	0.814318	0.992188	1.1093	1.24023	1.33996	1.57556	1.75396	2.10475	2.49284	3.01201	3.90221	5.88033	14.4305
0.0901408	0.243242	0.263587	0.363742	0.496094	0.557603	0.734092	0.816903	0.992188	1.1093	1.24023	1.34148	1.58827	1.75396	2.10475	2.49284	3.02447	3.91661	5.97376	14.7687
0.0901617	0.243563	0.263795	0.3646	0.496094	0.557707	0.735322	0.81851	0.992188	1.1093	1.24023	1.34555	1.58827	1.75396	2.11931	2.49284	3.0249	3.91719	5.97376	14.7981
0.0901869	0.244006	0.264168	0.364846	0.496094	0.558101	0.735466	0.82022	0.992188	1.1093	1.24023	1.34661	1.58827	1.75396	2.11931	2.49284	3.0278	3.92112	5.99432	15.4388
0.0902224	0.244636	0.264497	0.365699	0.496094	0.55987	0.736116	0.821235	0.992188	1.1093	1.24023	1.34734	1.58827	1.75396	2.11931	2.50004	3.0278	3.92197	5.99945	15.6447
0.0904919	0.244701	0.2648	0.366114	0.496094	0.562239	0.737116	0.821493	0.992188	1.1093	1.24023	1.34807	1.58827	1.75396	2.12703	2.51808	3.0278	3.92197	6.00458	16.869
0.0905167	0.244711	0.265333	0.36676	0.496094	0.56245	0.739425	0.822362	0.992188	1.1093	1.24023	1.34856	1.58827	1.75396	2.13091	2.52959	3.0278	3.93665	6.00458	18.204
0.0905247	0.244795	0.265914	0.366854	0.496094	0.562765	0.740976	0.824488	0.992188	1.1093	1.24023	1.34868	1.58827	1.75396	2.13378	2.52959	3.0278	3.93716	6.03524	21.0592
0.0905532	0.244836	0.266126	0.367001	0.496094	0.562822	0.741807	0.824831	0.992188	1.1093	1.24023	1.34885	1.58827	1.75396	2.13378	2.52959	3.0278	3.94257	6.04034	23.9465
0.0907869	0.245449	0.266498	0.368473	0.496094	0.564608	0.742943	0.825191	0.992188	1.1093	1.24023	1.35217	1.58827	1.75396	2.13378	2.52959	3.03228	3.96891	6.04034	26.0744
0.0909369	0.247241	0.266523	0.368961	0.496094	0.565535	0.744141	0.826716	0.992188	1.1093	1.24023	1.35387	1.58827	1.75396	2.13378	2.53502	3.0404	3.97991	6.08094	60.0294
0.0909741	0.247262	0.26661	0.369823	0.496094	0.566166	0.744141	0.826777	0.992188	1.1093	1.24023	1.3569	1.58827	1.75396	2.13378	2.54452	3.04513	3.99353	6.10115	62.2998
0.0911065	0.247263	0.266941	0.369992	0.496094	0.566182	0.744141	0.826839	0.992188	1.1093	1.24023	1.35741	1.58827	1.75396	2.13378	2.54777	3.06135	3.99964	6.12631
0.0911154	0.247329	0.267001	0.370246	0.496094	0.567085	0.744141	0.827286	0.992188	1.1093	1.24023	1.35808	1.58827	1.75396	2.13378	2.55234	3.06776	3.99964	6.13634
0.0913826	0.247408	0.267134	0.370278	0.496094	0.567326	0.744141	0.827756	0.992188	1.1093	1.24023	1.36373	1.58827	1.75396	2.13378	2.5538	3.06817	4.00732	6.13634
0.091457	0.247901	0.26735	0.37052	0.496094	0.568085	0.744141	0.827772	0.992188	1.1093	1.24023	1.36682	1.58827	1.75396	2.13378	2.5538	3.0688	4.00732	6.14135
0.0914706	0.248047	0.267432	0.37189	0.496094	0.568686	0.744141	0.828251	0.992188	1.10991	1.24023	1.36793	1.58827	1.75927	2.13378	2.5538	3.07293	4.03791	6.20117
0.0916932	0.248047	0.26762	0.372165	0.496094	0.56872	0.744141	0.828519	0.992188	1.11039	1.24023	1.37658	1.58827	1.76251	2.13378	2.5538	3.08356	4.03791	6.22098
0.0917178	0.248047	0.267665	0.373144	0.496094	0.568721	0.744141	0.828638	0.992188	1.11104	1.24023	1.37793	1.58827	1.77857	2.13378	2.5538	3.09335	4.03791	6.28005
0.0917392	0.248047	0.267754	0.373297	0.496094	0.56892	0.744141	0.830109	0.992188	1.11376	1.24023	1.38759	1.58827	1.78318	2.13378	2.5538	3.0965	4.04637	6.46827
0.0918083	0.248047	0.268499	0.373492	0.496094	0.57106	0.744141	0.830281	0.992188	1.11611	1.24023	1.39191	1.58827	1.78869	2.13378	2.5538	3.10906	4.0515	6.49201
0.0918206	0.248047	0.269152	0.373736	0.496094	0.57157	0.744141	0.830664	0.992188	1.11937	1.24023	1.3941	1.58827	1.78869	2.13378	2.5538	3.12661	4.05332	6.70186
0.0919067	0.248047	0.269631	0.373846	0.496094	0.572783	0.744141	0.832585	0.992188	1.12289	1.24023	1.39923	1.58827	1.78869	2.13378	2.5538	3.12694	4.06827	6.84268
0.0919753	0.248047	0.269758	0.373888	0.496094	0.572832	0.744141	0.834886	0.992188	1.12441	1.24023	1.40064	1.58827	1.78869	2.13378	2.5538	3.15712	4.06827	6.86064
0.0920588	0.248047	0.269853	0.373899	0.496094	0.573147	0.744141	0.836534	0.992188	1.1249	1.24023	1.40317	1.58827	1.78869	2.13378	2.5538	3.15712	4.07331	6.94531
0.092122	0.248047	0.270375	0.3739	0.496094	0.573549	0.744141	0.839052	0.992188	1.12576	1.24023	1.40317	1.58827	1.78869	2.13378	2.5538	3.15712	4.08866	6.98506
0.0921708	0.248047	0.270454	0.374225	0.496094	0.574358	0.744141	0.839225	0.992188	1.12865	1.24023	1.40317	1.58827	1.78869	2.13378	2.55437	3.15712	4.12832	6.98506
0.0922098	0.248047	0.270531	0.376443	0.496094	0.575268	0.744141	0.840144	0.992188	1.13471	1.24023	1.40317	1.58827	1.78869	2.14687	2.56408	3.15712	4.13704	7.00266
0.0923829	0.248047	0.270933	0.376872	0.496094	0.575486	0.744141	0.841327	0.992188	1.13532	1.24023	1.40317	1.58827	1.78869	2.15277	2.57756	3.16421	4.15699	7.05082
0.0927597	0.248047	0.271176	0.377063	0.496094	0.575713	0.744141	0.842286	0.992188	1.13768	1.24023	1.40317	1.58827	1.78869	2.1589	2.58485	3.16525	4.15802	7.09431
0.092821	0.248047	0.271297	0.377767	0.496094	0.577674	0.744141	0.843888	0.992188	1.13804	1.24023	1.40317	1.58827	1.78869	2.16031	2.58861	3.16993	4.15802	7.19763
0.09313	0.248047	0.271724	0.377811	0.496094	0.579703	0.744141	0.844031	0.992188	1.14003	1.24023	1.40317	1.58827	1.80124	2.16636	2.58969	3.17655	4.15802	7.21045
0.0931409	0.248047	0.272991	0.378499	0.496094	0.57979	0.744141	0.845777	0.992188	1.14173	1.24023	1.40317	1.58827	1.80551	2.1745	2.58969	3.17655	4.17496	7.21045
0.0931894	0.248047	0.273391	0.379427	0.496094	0.580052	0.744141	0.848598	0.992188	1.14897	1.24023	1.40317	1.58827	1.80581	2.18591	2.58969	3.17655	4.1782	7.21045
0.0934452	0.248047	0.273742	0.379462	0.496094	0.581068	0.744141	0.850408	0.992188	1.14908	1.24023	1.40317	1.58827	1.80581	2.18905	2.5943	3.17655	4.21089	7.29528
0.0935122	0.248047	0.273815	0.379497	0.496094	0.583158	0.744141	0.85096	0.992188	1.15004	1.24023	1.40317	1.58827	1.80581	2.18982	2.61636	3.17655	4.2168	7.29949
0.0936814	0.248047	0.274522	0.37952	0.496094	0.58316	0.744141	0.851233	0.992188	1.15131	1.24023	1.40317	1.58827	1.80581	2.19572	2.62029	3.17655	4.22409	7.34571
0.0937579	0.248047	0.275035	0.379605	0.496094	0.583387	0.744141	0.851498	0.992188	1.15509	1.24023	1.40317	1.58827	1.80581	2.2016	2.62324	3.17655	4.22409	7.37496
0.0937883	0.248047	0.275222	0.379785	0.496094	0.583868	0.744141	0.852282	0.992188	1.15558	1.24023	1.40317	1.58827	1.80581	2.20876	2.62378	3.1879	4.22409	7.37496
0.0942696	0.248047	0.275338	0.379972	0.496094	0.584712	0.744141	0.855301	0.992188	1.15595	1.24023	1.40317	1.58827	1.80581	2.21144	2.63366	3.22461	4.23863	7.39995
0.0945072	0.248047	0.275366	0.380457	0.496094	0.584774	0.744141	0.857344	0.992188	1.15964	1.24023	1.40317	1.58827	1.81234	2.21702	2.63677	3.22461	4.23863	7.57254
0.0945395	0.248047	0.276053	0.382654	0.496094	0.584815	0.744141	0.859484	0.992188	1.16125	1.24023	1.40317	1.58827	1.81599	2.2186	2.63677	3.22461	4.23863	7.68945
0.0946501	0.248047	0.276086	0.383223	0.496094	0.584821	0.744141	0.860904	0.992747	1.16559	1.24023	1.40317	1.58827	1.81859	2.2186	2.63677	3.22461	4.24588	7.70145
0.0946962	0.248047	0.276305	0.383226	0.496094	0.584981	0.744141	0.861335	0.995319	1.17069	1.24023	1.40317	1.58827	1.82137	2.2186	2.63677	3.22461	4.24588	7.70544
0.0947043	0.248047	0.276661	0.383402	0.496094	0.586561	0.744141	0.863939	0.995456	1.17259	1.24023	1.40317	1.58827	1.83176	2.22238	2.63677	3.22461	4.25351	7.70544
0.0948017	0.248047	0.277899	0.383634	0.496094	0.586728	0.744141	0.863988	0.998004	1.17333	1.24023	1.40551	1.58827	1.83879	2.22849	2.63677	3.22529	4.26102	7.78488
0.0948364	0.248047	0.278395	0.383661	0.496094	0.589417	0.744141	0.864057	0.998043	1.17755	1.24023	1.40635	1.58827	1.84161	2.23223	2.63677	3.23414	4.26756	7.94137
0.0950503	0.248047	0.278874	0.384226	0.496094	0.589497	0.744141	0.869251	0.998232	1.18091	1.24023	1.41584	1.58827	1.84281	2.23242	2.63677	3.23414	4.28195	8.01464
0.0950894	0.248047	0.278891	0.384342	0.496094	0.589742	0.744141	0.869292	0.998333	1.18335	1.24023	1.41799	1.58827	1.85163	2.23242	2.63677	3.23434	4.2926	8.11003
0.0952055	0.248047	0.279189	0.384409	0.496094	0.589903	0.744141	0.870279	0.999315	1.18413	1.24023	1.42267	1.58827	1.85763	2.23242	2.6399	3.24678	4.30365	8.18179
0.095294	0.248047	0.279304	0.385058	0.496094	0.590286	0.744141	0.871205	1.00274	1.18611	1.24023	1.42548	1.58827	1.85978	2.23242	2.6469	3.24721	4.313	8.21181
0.095345	0.248047	0.279487	0.385764	0.496094	0.590538	0.744141	0.871606	1.00287	1.18662	1.24023	1.43052	1.58827	1.86918	2.23242	2.67155	3.25846	4.33195	8.2193
0.0957777	0.248047	0.279821	0.386461	0.496094	0.590783	0.744141	0.875373	1.00645	1.1889	1.24023	1.43255	1.58827	1.87096	2.23242	2.67155	3.27328	4.33195	8.24546
0.0958174	0.248047	0.280078	0.387501	0.496094	0.591923	0.744141	0.875601	1.00654	1.19018	1.24023	1.4336	1.58827	1.8804	2.23242	2.67155	3.27432	4.33683	8.31975
0.0960082	0.248047	0.280572	0.387783	0.496094	0.592159	0.744141	0.875638	1.00669	1.19251	1.24023	1.43635	1.58827	1.88404	2.23242	2.67155	3.29153	4.33905	8.31975
0.0960356	0.248047	0.280812	0.38835	0.496094	0.592386	0.744141	0.876381	1.00808	1.19317	1.24023	1.43954	1.58827	1.88907	2.23242	2.67155	3.29364	4.34282	8.36768
0.0960692	0.248047	0.280881	0.388378	0.496094	0.592518	0.744141	0.877543	1.00924	1.19669	1.24023	1.44635	1.58827	1.88907	2.23242	2.67155	3.30457	4.34589	8.36768
0.0964014	0.248047	0.281467	0.388544	0.496094	0.593792	0.744141	0.877572	1.01021	1.2016	1.24023	1.44635	1.58827	1.88907	2.23242	2.67155	3.30936	4.36875	8.44817
0.0965607	0.248047	0.281492	0.390116	0.496094	0.594578	0.744141	0.877866	1.01179	1.20222	1.24023	1.44635	1.58827	1.88907	2.23242	2.67155	3.30936	4.37993	8.49176
0.0966158	0.248047	0.281798	0.391322	0.496094	0.595539	0.744141	0.879723	1.01727	1.20365	1.24023	1.44635	1.58827	1.88907	2.23688	2.67155	3.31018	4.3884	8.55312
0.0967148	0.248047	0.282116	0.391676	0.496094	0.595574	0.744141	0.879723	1.01825	1.21684	1.24023	1.44635	1.58827	1.88907	2.24616	2.67155	3.3279	4.3884	8.61048
0.0968924	0.248047	0.282466	0.393691	0.496094	0.597844	0.744141	0.879773	1.01949	1.21974	1.24023	1.44635	1.58827	1.88907	2.24616	2.67155	3.33713	4.39393	8.94346
0.0971017	0.248047	0.282606	0.393902	0.496094	0.600652	0.744141	0.882198	1.02272	1.2268	1.24023	1.44635	1.5993	1.88907	2.24616	2.67155	3.33713	4.3954	8.94346
0.0971651	0.248047	0.282606	0.394202	0.496094	0.601643	0.744141	0.882375	1.02272	1.23974	1.24023	1.44635	1.60086	1.88907	2.24616	2.67155	3.33713	4.4372	8.9469
0.097266	0.248047	0.282614	0.394633	0.496094	0.601803	0.744141	0.882542	1.02272	1.24023	1.24023	1.44635	1.60288	1.89088	2.24616	2.67155	3.33713	4.43818	8.94707
0.0975623	0.248047	0.282902	0.394713	0.496094	0.602405	0.744141	0.883498	1.02272	1.24023	1.24023	1.44635	1.60339	1.89195	2.24616	2.67155	3.33713	4.44074	8.96407
0.0976229	0.248047	0.282995	0.395677	0.496094	0.602638	0.744141	0.883947	1.02272	1.24023	1.24023	1.44635	1.60767	1.8935	2.24616	2.67337	3.33713	4.47173	8.98806
0.0976814	0.248047	0.283193	0.395825	0.496094	0.603001	0.744141	0.884341	1.02272	1.24023	1.24023	1.44635	1.61059	1.89537	2.24616	2.67748	3.33713	4.47173	8.98806
0.0978219	0.248047	0.283273	0.395982	0.496094	0.60391	0.744141	0.885203	1.02272	1.24023	1.24023	1.44635	1.61165	1.89674	2.25591	2.68304	3.33713	4.47605	8.99149
0.0979003	0.248047	0.283755	0.396325	0.496094	0.603936	0.744141	0.885436	1.02272	1.24023	1.24023	1.44635	1.62346	1.90416	2.26804	2.68304	3.33713	4.49232	9.01882
0.0979236	0.248047	0.283828	0.397087	0.496094	0.604202	0.744141	0.887179	1.02272	1.24023	1.24023	1.44635	1.62498	1.90853	2.26831	2.68304	3.33713	4.52643	9.02904
0.0979612	0.248047	0.283885	0.397199	0.496094	0.605824	0.744141	0.888117	1.02272	1.24023	1.24023	1.44635	1.63084	1.91393	2.28688	2.68304	3.34348	4.55354	9.06487
0.0979612	0.248047	0.28528	0.397788	0.496094	0.606965	0.744141	0.893741	1.02272	1.24023	1.24023	1.44635	1.6396	1.91517	2.28688	2.68304	3.35644	4.55354	9.14752
0.098144	0.248047	0.286098	0.397856	0.496094	0.60808	0.744141	0.894346	1.02272	1.24023	1.24023	1.44635	1.64596	1.92205	2.28688	2.68492	3.36498	4.5677	9.14752
0.09838	0.248047	0.286408	0.397873	0.496094	0.608145	0.744141	0.894346	1.02272	1.24023	1.24023	1.44635	1.65747	1.92823	2.28688	2.70376	3.3738	4.57376	9.18581
0.0984463	0.248047	0.287101	0.398075	0.496094	0.608807	0.744141	0.894346	1.02272	1.24023	1.24023	1.44635	1.66395	1.93389	2.28688	2.71291	3.3738	4.60472	9.25559
0.0987702	0.248047	0.288261	0.398626	0.496094	0.609187	0.744141	0.894346	1.02272	1.24023	1.24192	1.44635	1.66395	1.93407	2.28688	2.7259	3.3738	4.60613	9.26115
0.0988201	0.248047	0.288487	0.399198	0.496094	0.609503	0.744141	0.894346	1.02272	1.24023	1.24382	1.44635	1.66395	1.93731	2.28688	2.72852	3.3738	4.61602	9.34054
0.0989909	0.248047	0.288828	0.399558	0.496094	0.609901	0.744141	0.894346	1.02272	1.24023	1.24625	1.44635	1.66395	1.93731	2.28688	2.73093	3.3738	4.63854	9.36028
0.0990631	0.248047	0.289384	0.40036	0.496094	0.61061	0.744141	0.894346	1.02272	1.24023	1.24696	1.44635	1.67103	1.93731	2.28688	2.73977	3.38464	4.66038	9.44534
0.0990826	0.248047	0.289462	0.400884	0.496094	0.6111	0.744141	0.894346	1.02272	1.24023	1.24726	1.44635	1.67805	1.93731	2.28688	2.74515	3.42023	4.67917	9.62947
0.0993195	0.248047	0.289739	0.40114	0.496094	0.612349	0.744141	0.894346	1.02272	1.24023	1.24884	1.44635	1.68798	1.93731	2.28688	2.75396	3.4251	4.68014	9.67383
0.0993954	0.248047	0.290017	0.401515	0.496094	0.612729	0.744141	0.894346	1.02272	1.24023	1.25232	1.44635	1.68989	1.93731	2.28745	2.75506	3.43016	4.70636	9.7467
0.0995793	0.248047	0.290211	0.403553	0.496094	0.612822	0.744141	0.894346	1.02272	1.24023	1.25309	1.44635	1.70007	1.93731	2.29548	2.77271	3.44224	4.70636	9.81275
0.0995936	0.248047	0.290213	0.403799	0.496094	0.612963	0.744141	0.894346	1.02272	1.24023	1.25913	1.44635	1.70159	1.93731	2.30548	2.77325	3.44598	4.70636	9.87837
0.0996322	0.248047	0.290568	0.404456	0.496094	0.61451	0.744141	0.894346	1.02272	1.24023	1.26136	1.44635	1.70179	1.93731	2.30935	2.77325	3.44598	4.71355	9.95624
0.100121	0.248047	0.291007	0.404834	0.496094	0.614648	0.744141	0.894346	1.02272	1.24023	1.26177	1.44635	1.70764	1.93731	2.31062	2.77325	3.46053	4.73893	10.0727
0.100172	0.248047	0.29108	0.405194	0.496094	0.616253	0.744141	0.894346	1.02272	1.24023	1.26212	1.44635	1.71029	1.93731	2.32618	2.77325	3.47266	4.73893	10.1001
0.100266	0.248047	0.291237	0.405207	0.496094	0.616405	0.744141	0.894346	1.02272	1.24023	1.26226	1.44635	1.71935	1.93731	2.34007	2.77325	3.47266	4.73893	10.1184
0.100485	0.248047	0.291447	0.405346	0.496094	0.619784	0.744141	0.894346	1.02272	1.24023	1.2648	1.44635	1.72896	1.93731	2.34007	2.77325	3.47567	4.73893	10.1214
0.100607	0.248047	0.291498	0.405577	0.496094	0.620212	0.744141	0.894346	1.02272	1.24023	1.2648	1.44635	1.73628	1.93731	2.34007	2.77325	3.4896	4.73893	10.1699
0.10097	0.248047	0.291546	0.405921	0.496094	0.620532	0.744141	0.894346	1.02272	1.24023	1.2648	1.44635	1.73633	1.93731	2.34007	2.77325	3.49268	4.79058	10.2782
0.10098	0.248047	0.291839	0.406085	0.496094	0.620606	0.744141	0.894346	1.02272	1.24023	1.2648	1.44635	1.73633	1.93731	2.34007	2.77325	3.50791	4.79772	10.326
0.101134	0.248047	0.292417	0.409479	0.496094	0.620869	0.744141	0.894346	1.02272	1.24023	1.2648	1.44635	1.73633	1.93731	2.34007	2.77325	3.50791	4.8162	10.326
0.101166	0.248047	0.292613	0.410026	0.496094	0.621119	0.744141	0.894346	1.02272	1.24023	1.2648	1.44635	1.73633	1.93731	2.34007	2.77325	3.50791	4.8162	10.5267
0.101457	0.248047	0.292704	0.410566	0.496302	0.621708	0.744141	0.894346	1.02272	1.24023	1.2648	1.44635	1.73633	1.93731	2.34007	2.77325	3.50791	4.82399	10.6169
0.101484	0.248047	0.292911	0.411959	0.496667	0.62196	0.744141	0.894346	1.02272	1.24023	1.2648	1.44635	1.73633	1.93731	2.34007	2.77325	3.50791	4.84708	10.6545
0.102007	0.248047	0.29328	0.412039	0.496948	0.622728	0.744141	0.894346	1.02272	1.24023	1.2648	1.44635	1.73633	1.93731	2.34007	2.77325	3.50791	4.86368	10.7092
0.102085	0.248047	0.293408	0.412382	0.497671	0.624247	0.744141	0.894346	1.02272	1.24023	1.2648	1.44635	1.73633	1.93731	2.34007	2.77325	3.50791	4.87335	10.7092
0.102109	0.248047	0.293563	0.412976	0.49772	0.625711	0.744141	0.894346	1.02272	1.24023	1.2648	1.44635	1.73633	1.93731	2.34007	2.77325	3.50791	4.88596	10.7092
0.102164	0.248047	0.293677	0.413258	0.497965	0.62724	0.744141	0.894346	1.02272	1.24023	1.2648	1.44635	1.73633	1.93731	2.34007	2.77325	3.50791	4.89447	10.7608
0.102249	0.248047	0.294363	0.413738	0.498573	0.629248	0.744141	0.894346	1.02272	1.24023	1.2648	1.44635	1.73633	1.93731	2.34007	2.77325	3.50791	4.89952	10.7618
0.102274	0.248047	0.294476	0.413761	0.499524	0.630543	0.744141	0.894346	1.02272	1.24023	1.2648	1.44635	1.73777	1.93731	2.34007	2.77325	3.50791	4.90004	10.8064
0.102687	0.248047	0.29463	0.416791	0.500821	0.631002	0.744141	0.894346	1.02272	1.24023	1.2648	1.44635	1.73798	1.95412	2.34007	2.77325	3.50791	4.90313	10.8802
0.102839	0.248047	0.294738	0.417173	0.500847	0.631257	0.744141	0.894346	1.02272	1.24023	1.2648	1.44635	1.74663	1.95727	2.34007	2.77325	3.50791	4.91108	10.9169
0.102925	0.248047	0.295267	0.417713	0.50121	0.631313	0.744141	0.894346	1.02272	1.24023	1.2648	1.44635	1.7507	1.95784	2.34969	2.77926	3.51957	4.92359	10.9506
0.103019	0.248047	0.295562	0.417982	0.501835	0.632251	0.744141	0.894346	1.02272	1.24023	1.2648	1.44635	1.75396	1.96068	2.35042	2.78015	3.52541	4.99063	10.9871
0.103187	0.248047	0.295726	0.418123	0.503291	0.633069	0.744141	0.894346	1.02272	1.24023	1.2648	1.44635	1.75396	1.96086	2.35269	2.7837	3.52835	4.99117	11.0095
0.103227	0.248047	0.295762	0.418494	0.504474	0.634713	0.744141	0.894346	1.02272	1.24023	1.2648	1.44635	1.75396	1.97967	2.35318	2.78923	3.53275	4.99185	11.0179
0.103269	0.248047	0.295838	0.419427	0.504553	0.639286	0.744141	0.894346	1.02272	1.24023	1.2648	1.44635	1.75396	1.98438	2.35318	2.79745	3.54891	4.99647	11.093
0.103472	0.248047	0.296893	0.419563	0.504771	0.639534	0.744141	0.894346	1.02272	1.24023	1.2648	1.45071	1.75396	1.98438	2.35318	2.79751	3.54946	5.02257	11.1649
0.103517	0.248047	0.296929	0.419944	0.504833	0.642037	0.744141	0.894829	1.02272	1.24023	1.2648	1.45364	1.75396	1.98438	2.35318	2.80633	3.55132	5.02257	11.1924
0.103806	0.248047	0.297972	0.420183	0.505109	0.642089	0.744141	0.895462	1.02272	1.24023	1.2648	1.45505	1.75396	1.98438	2.35318	2.80633	3.55149	5.05918	11.4344
0.10401	0.248047	0.298746	0.420448	0.505553	0.64219	0.744141	0.90125	1.02272	1.24023	1.2648	1.45567	1.75396	1.98438	2.35318	2.82189	3.55149	5.05918	11.5814
0.104011	0.248047	0.298858	0.420468	0.507662	0.642488	0.745618	0.902459	1.0249	1.24023	1.2648	1.46367	1.75396	1.98438	2.35318	2.82817	3.5645	5.08358	11.5814
0.104108	0.248047	0.299146	0.421091	0.508275	0.643133	0.74766	0.902794	1.02521	1.24023	1.2648	1.46616	1.75396	1.98438	2.35318	2.82817	3.58321	5.1076	11.6476
0.104358	0.248047	0.299367	0.422058	0.508633	0.644286	0.750364	0.903231	1.02531	1.24023	1.2648	1.46643	1.75396	1.98438	2.35523	2.82817	3.58953	5.16152	11.6767
0.104419	0.248047	0.299669	0.42263	0.50904	0.644453	0.751078	0.903654	1.02919	1.24023	1.2648	1.4734	1.75396	1.98438	2.36603	2.82817	3.61162	5.17937	11.6767
0.10456	0.248047	0.300291	0.422724	0.509171	0.64463	0.753054	0.906015	1.0297	1.24023	1.2648	1.48039	1.75396	1.98688	2.36839	2.83168	3.61162	5.20898	11.87
0.104647	0.248047	0.30037	0.423135	0.509833	0.645581	0.754235	0.908819	1.03384	1.24023	1.2648	1.48613	1.75396	1.98824	2.38813	2.83424	3.64709	5.21489	11.9192
0.104826	0.248047	0.300872	0.423429	0.510271	0.646105	0.754563	0.909269	1.03528	1.24023	1.2648	1.48828	1.75396	1.99217	2.39215	2.84335	3.64805	5.23255	11.9193
0.104872	0.248047	0.301028	0.42379	0.510821	0.646254	0.754897	0.910679	1.03809	1.24023	1.2648	1.48828	1.75396	1.99823	2.39474	2.84352	3.65355	5.23255	12.0705
0.104985	0.248047	0.301036	0.424255	0.51105	0.647248	0.755995	0.91235	1.04586	1.24023	1.2648	1.48828	1.75396	1.99982	2.40673	2.8466	3.67064	5.25602	12.0705
0.105625	0.248047	0.301274	0.424619	0.51155	0.647495	0.756517	0.912638	1.04829	1.24023	1.2648	1.48828	1.75396	1.99982	2.41639	2.84733	3.6715	5.26187	12.1137
0.105645	0.248047	0.301577	0.424701	0.512854	0.647891	0.75832	0.913051	1.04887	1.24023	1.2648	1.48828	1.75396	1.99982	2.42308	2.8669	3.68129	5.26187	12.2023
0.105668	0.248047	0.301778	0.425732	0.513	0.651887	0.758955	0.916074	1.0496	1.24023	1.2648	1.48828	1.75396	1.99982	2.42582	2.87131	3.68352	5.30843	12.2375
0.105861	0.248047	0.302779	0.426356	0.513705	0.653449	0.761875	0.917029	1.04968	1.24023	1.2648	1.48828	1.75396	1.99982	2.43733	2.87377	3.68748	5.30843	12.2777
0.105956	0.248047	0.302945	0.426538	0.513802	0.654976	0.762802	0.918208	1.05077	1.24023	1.26655	1.48828	1.75396	1.99982	2.44044	2.88643	3.68748	5.30843	12.3152
0.105998	0.248047	0.303011	0.427497	0.514266	0.655094	0.763612	0.918641	1.05237	1.24023	1.26671	1.48828	1.75396	1.99982	2.44298	2.88745	3.70085	5.30843	12.3152
0.106174	0.248047	0.303097	0.4275	0.514535	0.655254	0.763996	0.920033	1.05237	1.24023	1.27182	1.48828	1.75396	1.99982	2.44298	2.8927	3.7207	5.34309	12.3177
0.10652	0.248047	0.303643	0.427501	0.51561	0.655486	0.76553	0.920952	1.05237	1.24023	1.2795	1.48828	1.75396	1.99982	2.44298	2.8927	3.7207	5.36607	12.3352
0.106593	0.248047	0.304031	0.42802	0.515713	0.656588	0.768148	0.925222	1.05237	1.24023	1.28012	1.48828	1.75396	1.99982	2.44298	2.8927	3.72171	5.44009	12.3452
0.106662	0.248047	0.304055	0.428189	0.516468	0.656976	0.769075	0.926241	1.05237	1.24023	1.28072	1.48828	1.75396	1.99982	2.44298	2.8927	3.75363	5.44574	12.3576
0.106778	0.248047	0.304559	0.428192	0.518729	0.657295	0.769477	0.927833	1.05237	1.24023	1.28141	1.48828	1.75396	2.01467	2.44827	2.89825	3.75579	5.46267	12.3576
0.106849	0.248047	0.304878	0.428193	0.518997	0.657444	0.769968	0.93391	1.05237	1.24023	1.29011	1.48828	1.75396	2.02267	2.45554	2.90331	3.76377	5.50753	12.4023
0.107159	0.248047	0.30603	0.428276	0.519168	0.657673	0.770571	0.93651	1.05237	1.24023	1.29082	1.48828	1.75396	2.02892	2.45554	2.90331	3.77072	5.57416	12.5135
0.107195	0.248047	0.306499	0.428639	0.520114	0.658999	0.770661	0.936808	1.05237	1.24023	1.29547	1.48828	1.75396	2.03201	2.45554	2.90331	3.77463	5.59619	12.5414
0.107236	0.248047	0.306589	0.428874	0.520647	0.660029	0.770921	0.939317	1.05237	1.24023	1.29576	1.4939	1.75396	2.03551	2.46115	2.90331	3.77814	5.62361	12.5748
0.107316	0.248047	0.306598	0.429262	0.521276	0.660345	0.771577	0.941093	1.05237	1.24023	1.29697	1.49416	1.75396	2.03794	2.46731	2.91484	3.78351	5.62361	12.6017
0.107755	0.248047	0.307446	0.429373	0.521589	0.661841	0.771675	0.944819	1.05237	1.24023	1.29826	1.49494	1.75396	2.04545	2.46792	2.91576	3.79439	5.62361	12.648
0.107837	0.248047	0.307812	0.429524	0.522097	0.662386	0.771787	0.946254	1.05237	1.24023	1.30336	1.50349	1.75396	2.04545	2.46873	2.92956	3.81454	5.66721	12.648
0.107973	0.248047	0.307855	0.429659	0.523268	0.664163	0.771862	0.947243	1.05237	1.24023	1.30793	1.50598	1.75396	2.04545	2.4776	2.93926	3.81471	5.71047	12.6601
0.108299	0.248047	0.307913	0.429719	0.525684	0.664621	0.771879	0.951606	1.05237	1.24023	1.32371	1.50881	1.75396	2.04545	2.48047	2.95148	3.81723	5.71047	12.6892
0.10832	0.248047	0.308256	0.42975	0.526034	0.664892	0.7732	0.951678	1.05237	1.24023	1.33088	1.50881	1.75396	2.04545	2.48047	2.95715	3.82357	5.7534	12.6989
0.108945	0.248047	0.308435	0.432359	0.526193	0.667403	0.774438	0.954241	1.05237	1.24023	1.33208	1.50881	1.75396	2.04545	2.48047	2.95719	3.85072	5.76942	12.6989
0.108946	0.248047	0.308509	0.432715	0.526643	0.667805	0.776078	0.956863	1.05237	1.24023	1.33381	1.50881	1.75396	2.04616	2.48047	2.95936	3.86637	5.76942	12.7545
0.109006	0.248047	0.308609	0.433748	0.527895	0.668699	0.776562	0.957748	1.05237	1.24023	1.33577	1.50881	1.75396	2.0552	2.48047	2.97305	3.86933	5.79071	12.865
0.109008	0.248047	0.308781	0.434749	0.528031	0.67017	0.778295	0.961206	1.05237	1.24023	1.33577	1.50881	1.75396	2.07187	2.48047	2.97342	3.87462	5.79071	12.9484
0.109043	0.248047	0.309347	0.435237	0.528307	0.670962	0.77862	0.961579	1.05237	1.24023	1.33577	1.50881	1.75396	2.10176	2.48047	2.97839	3.87462	5.80663	12.9793
0.109407	0.248047	0.309447	0.435516	0.529276	0.671527	0.780355	0.964026	1.05237	1.24023	1.33577	1.50881	1.75396	2.10228	2.48047	2.98585	3.87462	5.80663	13.0779
0.109569	0.248047	0.310362	0.436184	0.529753	0.671597	0.781496	0.966988	1.05237	1.24023	1.33577	1.50881	1.75396	2.10475	2.48047	2.98688	3.87462	5.81192	13.1348
0.109784	0.248047	0.310455	0.436247	0.529888	0.671611	0.781536	0.970504	1.05237	1.24023	1.33577	1.50881	1.75396	2.10475	2.48047	2.98688	3.87462	5.81192	13.1488
0.109792	0.248047	0.31106	0.436305	0.532702	0.673093	0.783131	0.97145	1.05237	1.24023	1.33577	1.52227	1.75396	2.10475	2.48047	2.98688	3.87682	5.89601	13.1558
0.109877	0.248047	0.311129	0.436668	0.532798	0.674537	0.784028	0.972347	1.05479	1.24023	1.33577	1.52638	1.75396	2.1089	2.48047	2.98688	3.88255	5.89601	13.2954
0.109933	0.248047	0.311328	0.437339	0.533444	0.67611	0.784393	0.973784	1.05701	1.24023	1.33577	1.53102	1.75396	2.11059	2.48047	2.98688	3.88255	5.96345	13.2954
0.109933	0.248047	0.31145	0.439061	0.535079	0.676162	0.784393	0.975124	1.06142	1.24023	1.33577	1.53749	1.75396	2.11093	2.48047	2.98688	3.88689	5.97376	13.3347
0.110242	0.248047	0.311639	0.44033	0.535137	0.67736	0.784393	0.975559	1.06649	1.24023	1.33577	1.54129	1.75396	2.11322	2.48047	2.98688	3.89746	5.99945	13.4266
0.110576	0.248047	0.311797	0.440366	0.535274	0.677454	0.784393	0.977369	1.06852	1.24023	1.33577	1.5415	1.75396	2.11931	2.49284	2.98688	3.90473	5.99945	13.5698
0.110731	0.248047	0.312526	0.441071	0.535399	0.67928	0.784393	0.978439	1.07055	1.24023	1.33577	1.54714	1.75396	2.11931	2.49284	2.98688	3.91712	5.99945	13.6581
0.110772	0.248047	0.312551	0.441079	0.536553	0.682317	0.784393	0.978895	1.07276	1.24023	1.33577	1.55868	1.75396	2.11931	2.49284	2.98688	3.91741	6.00458	14.0689
0.11092	0.248047	0.312717	0.441379	0.537787	0.683953	0.784393	0.979715	1.07296	1.24023	1.33577	1.56097	1.75396	2.11931	2.49284	2.98688	3.92105	6.00458	14.6872
0.110967	0.248047	0.312781	0.442956	0.538254	0.684044	0.784393	0.980378	1.07465	1.24023	1.33577	1.56332	1.75396	2.11931	2.49284	2.99716	3.92197	6.00458	14.9241
0.110989	0.248047	0.313124	0.442995	0.538622	0.684576	0.784393	0.980845	1.07548	1.24023	1.33577	1.56879	1.75396	2.12228	2.50005	2.99716	3.92197	6.03524	15.6289
0.110999	0.248047	0.313266	0.443049	0.538783	0.686648	0.784393	0.984593	1.07655	1.24023	1.33577	1.56879	1.75396	2.13378	2.51109	2.99716	3.92717	6.0556	16.8836
0.111144	0.248047	0.313378	0.443331	0.538925	0.687149	0.784393	0.985845	1.07731	1.24023	1.33577	1.56879	1.75396	2.13378	2.52959	2.99716	3.93562	6.08094	17.1062
0.111206	0.248047	0.313569	0.443372	0.539867	0.687886	0.784393	0.986357	1.07897	1.24023	1.33577	1.56879	1.75396	2.13378	2.52959	3.00523	3.93696	6.24566	20.2139
0.111252	0.248047	0.314492	0.443819	0.540401	0.688243	0.784393	0.987256	1.08063	1.24023	1.33577	1.56879	1.75433	2.13378	2.52959	3.01762	3.96875	6.28005	22.9815
0.111342	0.248047	0.314518	0.444004	0.540451	0.68906	0.784393	0.987485	1.08245	1.24023	1.33577	1.56879	1.75825	2.13378	2.5296	3.0278	3.96875	6.45399	25.6402
0.111431	0.248047	0.314624	0.444503	0.540757	0.690167	0.784393	0.987658	1.08433	1.24023	1.33577	1.56879	1.76212	2.13378	2.53351	3.0278	3.99964	6.49201	27.0962
0.111464	0.248047	0.314876	0.444752	0.541244	0.690311	0.784393	0.987828	1.0844	1.24023	1.33577	1.56879	1.76243	2.13378	2.5353	3.0278	3.99964	6.66503	56.8163
0.111559	0.248047	0.315545	0.446237	0.543029	0.691162	0.784393	0.988222	1.08556	1.24023	1.33577	1.56879	1.77112	2.13378	2.53663	3.0278	4.00111	6.67426	59.0357
0.111673	0.248047	0.31567	0.446674	0.543039	0.692522	0.784393	0.988329	1.08628	1.24023	1.33577	1.56879	1.7745	2.13378	2.54271	3.0278	4.00732	6.67426	60.8039
0.111759	0.248047	0.315694	0.447253	0.543255	0.693056	0.784393	0.990083	1.09511	1.24023	1.33577	1.56879	1.77589	2.13378	2.54472	3.0278	4.00732	6.70186
0.111816	0.248047	0.31591	0.447674	0.544033	0.694391	0.784393	0.992188	1.09844	1.24023	1.33577	1.56879	1.78538	2.13378	2.54559	3.0278	4.00732	6.71561
0.111985	0.248047	0.31683	0.447867	0.544123	0.695664	0.784393	0.992188	1.09865	1.24023	1.33577	1.57213	1.78869	2.13378	2.55025	3.0278	4.01067	6.73848
0.112082	0.248047	0.317293	0.448325	0.544135	0.696718	0.784393	0.992188	1.10296	1.24023	1.33577	1.57312	1.78869	2.13378	2.5538	3.04019	4.03791	6.77036
0.112385	0.248047	0.317521	0.449914	0.54417	0.699106	0.784393	0.992188	1.10309	1.24023	1.33577	1.57441	1.78869	2.13378	2.5538	3.04731	4.03791	6.82467
0.112421	0.248047	0.31858	0.450006	0.54544	0.699145	0.784393	0.992188	1.10338	1.24023	1.33577	1.57773	1.78869	2.13378	2.5538	3.06176	4.03791	6.84268
0.112664	0.248047	0.318989	0.456444	0.54565	0.701371	0.784393	0.992188	1.10594	1.24023	1.33577	1.58827	1.78869	2.13378	2.5538	3.06214	4.0413	6.84268
0.112814	0.248047	0.31924	0.457217	0.548341	0.701527	0.784393	0.992188	1.1093	1.24023	1.33577	1.58827	1.78869	2.13683	2.5538	3.07059	4.05938	6.87855
0.113191	0.248047	0.320536	0.458179	0.54869	0.701583	0.784393	0.992188	1.1093	1.24023	1.33577	1.58827	1.78869	2.14756	2.5538	3.07407	4.07548	6.89642
0.113204	0.248047	0.321575	0.458339	0.549277	0.701583	0.784393	0.992188	1.1093	1.24023	1.33577	1.58827	1.78869	2.1521	2.5538	3.07668	4.08696	7.01583
0.113206	0.248047	0.321743	0.458345	0.54945	0.701583	0.784393	0.992188	1.1093	1.24023	1.33577	1.58827	1.78869	2.1521	2.5538	3.08047	4.08993	7.02459
0.113218	0.248047	0.321852	0.458894	0.549652	0.701583	0.784393	0.992188	1.1093	1.24023	1.33577	1.58827	1.78869	2.15579	2.5538	3.08121	4.09089	7.05518
0.113369	0.248047	0.322783	0.461538	0.549722	0.701583	0.784393	0.992188	1.1093	1.24023	1.33577	1.58827	1.78869	2.15775	2.5538	3.08697	4.12832	7.10298
0.113534	0.248047	0.322988	0.462833	0.550194	0.701583	0.784393	0.992188	1.1093	1.24023	1.33577	1.58827	1.78869	2.15884	2.5538	3.10802	4.13733	7.19336
0.113592	0.248047	0.32308	0.463522	0.55081	0.701583	0.784393	0.992188	1.1093	1.24023	1.33577	1.58827	1.78869	2.1601	2.5538	3.10802	4.14653	7.21045
0.113671	0.248047	0.323845	0.463853	0.551057	0.701583	0.784393	0.992188	1.1093	1.24023	1.34644	1.58827	1.80258	2.16135	2.5538	3.10802	4.15802	7.29528
0.113683	0.248047	0.324523	0.464388	0.55119	0.701583	0.784393	0.992188	1.1093	1.24023	1.35264	1.58827	1.80581	2.16174	2.55467	3.10946	4.15802	7.29949
0.114037	0.248047	0.324804	0.466102	0.552173	0.701583	0.784393	0.992188	1.1093	1.24023	1.35664	1.58827	1.80581	2.16396	2.55504	3.11106	4.16475	7.34571
0.1144	0.248047	0.325901	0.466247	0.553286	0.701583	0.784393	0.992188	1.1093	1.24023	1.35707	1.58827	1.80581	2.16486	2.56113	3.11238	4.17803	7.39995
0.114587	0.248047	0.32616	0.466352	0.553353	0.701583	0.784393	0.992188	1.1093	1.24023	1.35973	1.58827	1.80581	2.18702	2.56245	3.12028	4.2168	7.47852
0.114728	0.248047	0.32658	0.466798	0.55344	0.701583	0.784393	0.992188	1.1093	1.24023	1.3642	1.58827	1.80581	2.19076	2.56841	3.13409	4.2168	7.53181
0.11473	0.248047	0.327334	0.467172	0.55465	0.701583	0.784393	0.992188	1.1093	1.24023	1.36479	1.58827	1.80581	2.19887	2.5709	3.14257	4.2168	7.53181
0.114812	0.248047	0.3277	0.467768	0.55465	0.701583	0.784393	0.992188	1.1093	1.24023	1.36641	1.58827	1.80581	2.21015	2.5736	3.15712	4.2168	7.6614
0.11487	0.248047	0.328188	0.46781	0.55465	0.701583	0.784393	0.992188	1.1093	1.24023	1.3683	1.58827	1.80581	2.21402	2.57562	3.15712	4.21919	7.68945
0.115048	0.248047	0.328931	0.467835	0.55465	0.701583	0.784393	0.992188	1.1093	1.24023	1.37068	1.58827	1.80581	2.2186	2.57608	3.15712	4.22152	7.69345
0.115098	0.248047	0.328961	0.470297	0.55465	0.701583	0.784393	0.992188	1.1093	1.24023	1.37124	1.58827	1.81023	2.2186	2.58165	3.15712	4.22409	7.74923
0.115136	0.248047	0.329003	0.47033	0.55465	0.701583	0.784393	0.992188	1.1093	1.24023	1.37293	1.58827	1.81431	2.2186	2.58969	3.15758	4.22409	7.76906
0.115227	0.248047	0.32923	0.471817	0.55465	0.701583	0.784393	0.992188	1.1093	1.24023	1.37396	1.58827	1.81699	2.2186	2.58969	3.15781	4.2356	7.78488
0.115467	0.248047	0.329358	0.471913	0.55465	0.701583	0.784393	0.992188	1.1093	1.24023	1.37992	1.58827	1.81781	2.2285	2.58969	3.17655	4.23664	7.88305
0.115527	0.248047	0.329575	0.472295	0.55465	0.701583	0.784393	0.992188	1.1093	1.24023	1.38671	1.58827	1.82222	2.23242	2.58969	3.17655	4.23863	7.91032
0.115789	0.248047	0.329654	0.474052	0.55465	0.701583	0.784393	0.992188	1.1093	1.24023	1.3928	1.58827	1.82531	2.23242	2.58969	3.17655	4.24588	7.92586
0.115983	0.248047	0.330875	0.4744	0.55465	0.701583	0.784393	0.992188	1.1093	1.24023	1.39692	1.58827	1.83067	2.23242	2.58969	3.17655	4.25761	7.94137
0.116202	0.248047	0.330951	0.474544	0.55465	0.701583	0.784393	0.992188	1.1093	1.24023	1.39809	1.58827	1.83138	2.23242	2.58969	3.1784	4.26756	7.97231
0.116238	0.248047	0.33096	0.474808	0.55465	0.701583	0.784393	0.992188	1.1093	1.24023	1.39991	1.58827	1.83207	2.23242	2.59579	3.19553	4.32066	7.99927
0.116289	0.248047	0.331054	0.474819	0.55465	0.701583	0.784393	0.992188	1.1093	1.24023	1.40317	1.58827	1.84155	2.23242	2.60059	3.21165	4.33195	7.99927
0.116448	0.248047	0.33156	0.475222	0.55465	0.701583	0.784393	0.992188	1.1093	1.24023	1.40317	1.58827	1.84265	2.23242	2.6066	3.21265	4.33519	7.99927
0.116459	0.248047	0.332481	0.475438	0.55465	0.701583	0.784393	0.992188	1.1093	1.24023	1.40317	1.58827	1.85686	2.24226	2.60805	3.22461	4.33727	8.07963
0.116525	0.248047	0.332527	0.475803	0.55465	0.701583	0.784393	0.992188	1.1093	1.24023	1.40317	1.58827	1.85831	2.24616	2.60974	3.22461	4.33905	8.24546
0.116558	0.248047	0.332563	0.476499	0.55465	0.701583	0.784393	0.992188	1.1093	1.24023	1.40317	1.58827	1.86289	2.24616	2.61474	3.26255	4.33905	8.24546
0.116587	0.248047	0.3333	0.477156	0.55465	0.701583	0.784393	0.992188	1.1093	1.24023	1.40317	1.58827	1.86647	2.24616	2.61558	3.28114	4.34363	8.29011
0.116835	0.248047	0.333325	0.478021	0.55465	0.701583	0.784393	0.992188	1.1093	1.24023	1.40317	1.58827	1.86692	2.24616	2.63677	3.28761	4.3884	8.33452
0.116875	0.248047	0.334304	0.478346	0.55465	0.701583	0.784393	0.992188	1.1093	1.24023	1.40317	1.58827	1.86967	2.24616	2.63677	3.29003	4.3884	8.33452
0.116974	0.248047	0.334913	0.478594	0.55465	0.701583	0.784393	0.992188	1.1093	1.24023	1.40317	1.58827	1.87669	2.24616	2.63677	3.29511	4.3954	8.56391
0.117066	0.248047	0.337125	0.478603	0.55465	0.701583	0.784393	0.992188	1.1093	1.24023	1.40317	1.58827	1.88907	2.24616	2.63677	3.29613	4.4036	8.57249
0.117211	0.248047	0.337803	0.478967	0.55465	0.701583	0.784393	0.992188	1.1093	1.24023	1.40317	1.58827	1.88907	2.24616	2.63677	3.30936	4.41148	8.59618
0.117239	0.248047	0.33812	0.479575	0.55465	0.701583	0.78479	0.992188	1.1093	1.24023	1.40317	1.58827	1.88907	2.24616	2.63677	3.31845	4.4372	8.69364
0.117263	0.248047	0.33849	0.480489	0.55465	0.701583	0.786953	0.992188	1.1093	1.24023	1.40317	1.58827	1.88907	2.24616	2.63677	3.32047	4.4372	8.70017
0.117324	0.248047	0.338585	0.480643	0.55465	0.701583	0.789569	0.992188	1.10937	1.24023	1.40317	1.58827	1.88907	2.24616	2.63878	3.32636	4.4372	8.70994
0.11756	0.248047	0.339328	0.482571	0.55465	0.701583	0.790628	0.992188	1.11502	1.24023	1.40317	1.58827	1.88907	2.24748	2.64277	3.3279	4.47173	8.76627
0.11767	0.248047	0.3394	0.482908	0.55465	0.701583	0.79081	0.992188	1.12062	1.24023	1.40317	1.58827	1.88907	2.24748	2.65689	3.33713	4.47173	8.7978
0.117704	0.248047	0.339401	0.483052	0.55465	0.701583	0.792289	0.992188	1.12159	1.24023	1.40317	1.58827	1.88907	2.25099	2.66564	3.33713	4.47173	8.7978
0.117738	0.248047	0.339464	0.483406	0.55465	0.701583	0.795591	0.992188	1.12234	1.24023	1.40317	1.58827	1.88907	2.25522	2.67155	3.33713	4.47173	8.87439
0.117815	0.248047	0.33984	0.483645	0.55465	0.701583	0.796506	0.992188	1.12241	1.24023	1.40317	1.58827	1.88907	2.26249	2.67155	3.33713	4.48689	8.89171
0.117815	0.248047	0.340759	0.48453	0.55465	0.701966	0.797649	0.992188	1.12473	1.24023	1.40317	1.58827	1.88912	2.28412	2.67155	3.33713	4.52643	8.89658
0.117955	0.248047	0.340883	0.485363	0.55465	0.703022	0.803334	0.992188	1.12686	1.24023	1.40317	1.58827	1.91426	2.28688	2.67155	3.33713	4.52701	8.97286
0.117987	0.248047	0.341109	0.485424	0.55465	0.703781	0.805436	0.992188	1.12744	1.24023	1.40317	1.58827	1.91591	2.28688	2.67155	3.33713	4.56029	9.09693
0.11804	0.248047	0.341342	0.486529	0.55465	0.704537	0.806093	0.992188	1.1394	1.24023	1.40317	1.58827	1.93044	2.28688	2.67155	3.33713	4.56029	9.12057
0.118305	0.248047	0.341709	0.488213	0.55465	0.704951	0.807086	0.992188	1.14279	1.24023	1.40317	1.58827	1.93076	2.28688	2.67155	3.33713	4.56029	9.26115
0.118368	0.248047	0.342171	0.488549	0.55465	0.70695	0.809945	0.992188	1.14698	1.24023	1.40317	1.58827	1.93697	2.28688	2.67155	3.34132	4.57114	9.2678
0.1184	0.248047	0.342395	0.489855	0.55465	0.708082	0.813634	0.992188	1.15038	1.24023	1.40317	1.58827	1.93731	2.28688	2.67155	3.34287	4.61394	9.30782
0.118456	0.248047	0.344113	0.49152	0.55465	0.70877	0.813727	0.992188	1.15752	1.24023	1.40581	1.593	1.93731	2.28688	2.67189	3.35313	4.66925	9.31085
0.118742	0.248047	0.344162	0.491814	0.55465	0.709438	0.816001	0.992188	1.15851	1.24023	1.40631	1.59367	1.93731	2.28688	2.67862	3.35456	4.69116	9.33724
0.118851	0.248047	0.344471	0.491919	0.55465	0.711183	0.817515	0.992188	1.15929	1.24023	1.41151	1.59436	1.93731	2.28688	2.68304	3.35828	4.71941	9.38981
0.118986	0.248047	0.345437	0.492267	0.55465	0.711375	0.818095	0.992188	1.15959	1.24023	1.41242	1.61809	1.93731	2.28688	2.68304	3.37265	4.72719	9.54578
0.119062	0.248047	0.345694	0.492681	0.55465	0.711805	0.820751	0.992188	1.16547	1.24023	1.41478	1.62155	1.93731	2.28688	2.68304	3.3738	4.73893	9.57152
0.119083	0.248047	0.345814	0.492874	0.55465	0.714728	0.828141	0.992188	1.16619	1.24023	1.41579	1.62315	1.93731	2.28688	2.68729	3.3738	4.73893	9.58437
0.119205	0.248047	0.347836	0.492974	0.55465	0.714893	0.830838	0.992188	1.16635	1.24023	1.42925	1.62999	1.93731	2.28688	2.69072	3.3738	4.76698	9.64835
0.119318	0.248047	0.348043	0.49398	0.55465	0.71517	0.832585	0.992188	1.17094	1.24023	1.42984	1.63152	1.93731	2.28688	2.69118	3.3738	4.77128	9.67383
0.119335	0.248047	0.34843	0.494779	0.55465	0.7158	0.83359	0.992188	1.17382	1.24023	1.43779	1.64063	1.93731	2.28688	2.69743	3.3738	4.77128	9.7467
0.119418	0.248047	0.348592	0.494783	0.55465	0.715895	0.835889	0.992188	1.17693	1.24023	1.44635	1.66395	1.93731	2.28688	2.69807	3.38773	4.77128	9.91437
0.11955	0.248047	0.3497	0.494825	0.55465	0.716998	0.836534	0.992188	1.1771	1.24023	1.44635	1.66395	1.93731	2.28926	2.70831	3.40447	4.77128	9.99909
0.120054	0.248047	0.35019	0.494944	0.55465	0.718116	0.836652	0.992188	1.17759	1.24729	1.44635	1.66395	1.93731	2.29281	2.709	3.41254	4.79058	10.0727
0.120104	0.248047	0.35038	0.495526	0.55465	0.718179	0.840438	0.992188	1.18734	1.25132	1.44635	1.66395	1.93731	2.29769	2.72852	3.43107	4.79058	10.0727
0.12018	0.248047	0.350642	0.496094	0.55465	0.719046	0.840471	0.992188	1.19588	1.25374	1.44635	1.66395	1.93731	2.30129	2.72852	3.43123	4.8162	10.1184
0.120202	0.248047	0.35065	0.496094	0.55465	0.719068	0.841851	0.992188	1.19645	1.25482	1.44635	1.66395	1.93731	2.30368	2.73076	3.45103	4.8162	10.1214
0.120264	0.248047	0.350791	0.496094	0.55465	0.723603	0.843228	0.992188	1.19776	1.25793	1.44635	1.66395	1.93731	2.30513	2.73415	3.45489	4.8162	10.2272
0.120409	0.248047	0.350791	0.496094	0.55465	0.725278	0.843968	0.992188	1.19953	1.26153	1.44635	1.66395	1.93731	2.30745	2.73692	3.45489	4.82778	10.2272
0.120456	0.248047	0.350791	0.496094	0.55465	0.727373	0.844248	0.992188	1.2	1.2648	1.44635	1.66395	1.93731	2.3082	2.73814	3.45489	4.83212	10.2272
0.120644	0.248047	0.350791	0.496094	0.55465	0.727598	0.845796	0.992188	1.20713	1.2648	1.44635	1.66513	1.93731	2.32472	2.76617	3.45513	4.84525	10.323
0.120939	0.248047	0.350791	0.496094	0.55465	0.72997	0.848599	0.992188	1.2192	1.2648	1.44635	1.66601	1.93731	2.32967	2.77105	3.47266	4.87335	10.4298
0.120992	0.248047	0.350791	0.496094	0.55465	0.731753	0.850135	0.992188	1.21977	1.2648	1.44635	1.66784	1.93731	2.33326	2.77325	3.47897	4.89136	10.4563
0.121217	0.248047	0.350791	0.496094	0.55465	0.73181	0.852014	0.992188	1.21986	1.2648	1.44635	1.66795	1.93731	2.33608	2.77325	3.484	4.89225	10.468
0.121932	0.248047	0.350791	0.496094	0.55465	0.733965	0.852553	0.992188	1.22612	1.2648	1.44635	1.67382	1.93731	2.33668	2.77325	3.49225	4.91108	10.468
0.121995	0.248047	0.350791	0.496094	0.55465	0.736074	0.852694	0.992188	1.22803	1.2648	1.44635	1.67595	1.93731	2.34007	2.77325	3.50791	4.92359	10.468
0.122305	0.248047	0.350791	0.496094	0.55465	0.736669	0.852869	0.992188	1.2312	1.2648	1.44635	1.67737	1.93731	2.34007	2.77325	3.50791	4.9423	10.5467
0.122409	0.248047	0.350791	0.496094	0.55465	0.738742	0.855435	0.992188	1.23264	1.2648	1.44635	1.68735	1.95771	2.34007	2.77325	3.50791	4.99185	10.5617
0.122715	0.248047	0.350791	0.496094	0.55465	0.74091	0.857181	0.992188	1.23486	1.2648	1.44635	1.69077	1.95962	2.34007	2.77325	3.50791	5.08642	10.6689
0.122881	0.248047	0.350791	0.496094	0.55465	0.744141	0.85917	0.992188	1.23511	1.2648	1.44635	1.69358	1.96025	2.34007	2.77325	3.50791	5.0895	10.7092
0.12333	0.248047	0.350791	0.496094	0.55465	0.744141	0.859288	0.992188	1.23657	1.2648	1.44635	1.7	1.96175	2.34007	2.77325	3.50791	5.1076	10.7608
0.123331	0.248047	0.350791	0.496094	0.55465	0.744141	0.862245	0.992188	1.24023	1.2648	1.44635	1.70048	1.98412	2.34007	2.77325	3.50791	5.11362	10.8064
0.123401	0.248047	0.350791	0.496094	0.55465	0.744141	0.862368	0.992188	1.24023	1.2648	1.44635	1.70065	1.98438	2.34007	2.77325	3.51946	5.11362	10.8717
0.123426	0.248047	0.350791	0.496094	0.55465	0.744141	0.863704	1.00163	1.24023	1.2648	1.44635	1.7075	1.98438	2.34007	2.77325	3.52149	5.11362	10.8802
0.123452	0.248047	0.350791	0.496094	0.55465	0.744141	0.865443	1.00233	1.24023	1.2648	1.44635	1.71227	1.98438	2.34007	2.77325	3.52541	5.1501	10.9394
0.123753	0.248047	0.350791	0.496094	0.55465	0.744141	0.865668	1.00303	1.24023	1.2648	1.44635	1.71385	1.98438	2.34007	2.77325	3.52541	5.16152	11.0095
0.123761	0.248047	0.350791	0.496094	0.55465	0.744141	0.866245	1.00392	1.24023	1.2648	1.44635	1.71626	1.98438	2.34007	2.77325	3.52541	5.17937	11.0095
0.12387	0.248047	0.350791	0.496094	0.55465	0.744141	0.868143	1.00575	1.24023	1.2648	1.44635	1.72225	1.98438	2.34007	2.77325	3.52957	5.21489	11.1924
0.123952	0.248047	0.350791	0.496094	0.55465	0.744141	0.869388	1.00645	1.24023	1.2648	1.44635	1.72435	1.98438	2.34007	2.77325	3.5349	5.21489	11.1924
0.123966	0.248047	0.350791	0.496094	0.55465	0.744141	0.869963	1.01042	1.24023	1.2648	1.44635	1.72651	1.98438	2.34074	2.77325	3.55149	5.23255	11.1924
0.123992	0.248047	0.350791	0.496094	0.55465	0.744141	0.87262	1.01672	1.24023	1.2648	1.44635	1.73305	1.98534	2.34447	2.77325	3.55149	5.25602	11.2727
0.124125	0.248047	0.350791	0.496094	0.55465	0.744141	0.876314	1.02272	1.24023	1.2648	1.44635	1.73633	1.98617	2.35318	2.77395	3.55149	5.26187	11.3127
0.124159	0.248047	0.350791	0.496094	0.55465	0.744141	0.877269	1.02272	1.24023	1.2648	1.44635	1.73633	1.9964	2.35318	2.78022	3.55938	5.27355	11.3127
0.124213	0.248047	0.350791	0.496094	0.55465	0.744141	0.877271	1.02272	1.24023	1.2648	1.44635	1.73633	1.99652	2.35318	2.78787	3.57725	5.27355	11.4344
0.124242	0.248047	0.350791	0.496094	0.55465	0.744141	0.877572	1.02272	1.24023	1.2648	1.44635	1.73633	1.99982	2.35318	2.80633	3.60401	5.27355	11.4532
0.124332	0.248047	0.350791	0.496094	0.55465	0.744141	0.878752	1.02272	1.24023	1.2648	1.44635	1.73633	1.99982	2.35907	2.80633	3.61162	5.30264	11.5522
0.124364	0.248047	0.350791	0.496094	0.55465	0.744141	0.878895	1.02272	1.24023	1.2648	1.44635	1.73633	1.99982	2.37202	2.80633	3.61162	5.34309	11.5708
0.124454	0.248047	0.350791	0.496094	0.55465	0.744141	0.880996	1.02272	1.24023	1.2648	1.44635	1.73633	1.99982	2.37554	2.80633	3.61162	5.34309	11.6608
0.124583	0.248047	0.350791	0.496094	0.55465	0.744141	0.881057	1.02272	1.24023	1.2648	1.44635	1.73633	1.99982	2.384	2.80633	3.62687	5.36607	11.6767
0.124654	0.248047	0.350791	0.496094	0.55465	0.744141	0.88174	1.02272	1.24023	1.2648	1.44635	1.74839	1.99982	2.39538	2.80633	3.62961	5.36607	11.9886
0.124865	0.248047	0.350791	0.496094	0.55465	0.744141	0.884621	1.02272	1.24023	1.2648	1.44635	1.75059	1.99982	2.39912	2.8102	3.66237	5.44009	12.0031
0.125044	0.248047	0.350791	0.496094	0.55465	0.744141	0.886918	1.02272	1.24023	1.2648	1.44635	1.75225	1.99982	2.40003	2.82817	3.66237	5.44009	12.0934
0.125318	0.248047	0.350791	0.496094	0.55465	0.744141	0.887355	1.02272	1.24023	1.2648	1.44635	1.75396	1.99982	2.40216	2.82817	3.67987	5.44009	12.0959
0.125476	0.248047	0.350791	0.496094	0.55465	0.744141	0.88903	1.02272	1.24023	1.2648	1.44635	1.75396	1.99982	2.41237	2.82817	3.68748	5.44574	12.1085
0.125504	0.248047	0.350791	0.496094	0.55465	0.744141	0.889857	1.02272	1.24023	1.2648	1.44635	1.75396	1.99982	2.41404	2.82817	3.68748	5.46267	12.1619
0.125726	0.248047	0.350791	0.496094	0.55465	0.744141	0.890437	1.02272	1.24023	1.2648	1.44635	1.75396	1.99982	2.42373	2.82817	3.68748	5.46267	12.1619
0.125795	0.248047	0.350791	0.496094	0.55465	0.744141	0.892225	1.02272	1.24023	1.2648	1.44635	1.75396	1.99982	2.42444	2.82817	3.69513	5.50753	12.2203
0.126096	0.248047	0.350791	0.496094	0.55465	0.744141	0.894346	1.02272	1.24023	1.2648	1.44635	1.75396	1.99982	2.4246	2.82817	3.69826	5.50753	12.2526
0.126163	0.248047	0.350791	0.496094	0.55465	0.744141	0.894346	1.02272	1.24023	1.2648	1.45037	1.75396	1.99982	2.42523	2.82817	3.7207	5.50753	12.4296
0.12618	0.248047	0.350791	0.496094	0.55465	0.744141	0.894346	1.02272	1.24023	1.2648	1.46213	1.75396	2.01196	2.43188	2.82817	3.7207	5.57416	12.4568
0.126323	0.248047	0.350791	0.496094	0.55465	0.744141	0.894346	1.02272	1.24023	1.2648	1.46739	1.75396	2.01844	2.43323	2.82817	3.72896	5.57416	12.4568
0.126518	0.248047	0.350791	0.496094	0.55465	0.744141	0.894346	1.02272	1.24023	1.2648	1.4696	1.75396	2.01868	2.44298	2.82871	3.7594	5.61266	12.4568
0.126548	0.248047	0.350791	0.496094	0.55465	0.744141	0.894346	1.02272	1.24023	1.2648	1.47054	1.75396	2.01894	2.44298	2.8359	3.77814	5.62361	12.5233
0.126562	0.248047	0.350791	0.496094	0.55483	0.744141	0.894346	1.02272	1.24023	1.2648	1.47436	1.75396	2.01914	2.44298	2.84123	3.78184	5.66178	12.5503
0.126739	0.248047	0.350791	0.496094	0.559751	0.744141	0.894346	1.02272	1.24023	1.2648	1.4759	1.75396	2.0247	2.44298	2.85351	3.78627	5.71047	12.5748
0.126989	0.248047	0.350791	0.496094	0.560835	0.744141	0.894346	1.02272	1.24023	1.2648	1.4778	1.75396	2.02498	2.44298	2.86038	3.78801	5.71047	12.6407
0.127189	0.248047	0.350791	0.496094	0.561195	0.744141	0.894346	1.02272	1.24023	1.2648	1.48778	1.75396	2.02669	2.44298	2.86045	3.79326	5.71047	12.6407
0.127331	0.248047	0.350791	0.496094	0.561285	0.744141	0.894346	1.02272	1.24023	1.2648	1.48828	1.75396	2.02889	2.44298	2.86473	3.79439	5.71047	12.648
0.127556	0.248047	0.350791	0.496094	0.562278	0.744141	0.894346	1.02272	1.24023	1.2648	1.48828	1.75396	2.03509	2.45554	2.8817	3.79439	5.72661	12.648
0.127589	0.248047	0.350791	0.496094	0.562565	0.744141	0.894346	1.02272	1.24023	1.2648	1.48828	1.75396	2.03588	2.45554	2.88952	3.81624	5.7534	12.648
0.127996	0.248047	0.350791	0.496094	0.563559	0.744141	0.894346	1.02272	1.24023	1.2648	1.48828	1.75396	2.038	2.45554	2.89163	3.81704	5.81192	12.6528
0.128046	0.248047	0.350791	0.496094	0.56565	0.744141	0.894346	1.02272	1.24023	1.2648	1.48828	1.75396	2.04034	2.45554	2.8927	3.82588	5.81192	12.7545
0.128218	0.248047	0.350791	0.496094	0.568199	0.744141	0.894346	1.02272	1.24023	1.2648	1.48828	1.75396	2.04545	2.45554	2.8927	3.83101	5.83833	12.8913
0.12845	0.248047	0.350791	0.496094	0.568287	0.744141	0.894346	1.02272	1.24023	1.2648	1.48828	1.75396	2.04545	2.45554	2.8927	3.83911	5.85412	12.9413
0.128696	0.248047	0.350791	0.496094	0.570675	0.744141	0.894346	1.02272	1.24023	1.2648	1.48828	1.75396	2.04545	2.45793	2.8927	3.84429	5.89601	12.9413
0.128803	0.248047	0.350791	0.496094	0.57151	0.744141	0.894346	1.02272	1.24023	1.2648	1.48828	1.75396	2.04545	2.47069	2.8927	3.85815	5.95312	12.9413
0.128938	0.248047	0.350791	0.496094	0.5718	0.744141	0.894346	1.02272	1.24023	1.2648	1.48828	1.75396	2.04545	2.48047	2.8927	3.8587	5.95829	12.9413
0.1293	0.248047	0.350791	0.496094	0.572093	0.744141	0.894346	1.02272	1.24023	1.2668	1.48828	1.75396	2.04545	2.48047	2.8927	3.8587	5.99945	12.9413
0.129319	0.248047	0.350791	0.496094	0.572941	0.744141	0.894346	1.02272	1.24023	1.26833	1.48828	1.75396	2.04545	2.48047	2.8927	3.87452	5.99945	12.9579
0.129387	0.248047	0.350791	0.496094	0.575627	0.744141	0.894346	1.02272	1.24023	1.27035	1.48828	1.75396	2.04987	2.48047	2.8927	3.87462	6.03524	13.0549
0.12941	0.248047	0.350791	0.496094	0.576374	0.744141	0.894346	1.02272	1.24023	1.27616	1.48828	1.75396	2.06028	2.48047	2.8927	3.87462	6.03524	13.0549
0.129457	0.248047	0.350791	0.496094	0.576584	0.744141	0.894346	1.02272	1.24023	1.27946	1.48828	1.75396	2.06305	2.48047	2.89294	3.87462	6.08094	13.1675
0.129563	0.248047	0.350791	0.496094	0.577012	0.744141	0.894346	1.02272	1.24023	1.28219	1.48828	1.75396	2.06595	2.48047	2.90741	3.87462	6.14135	13.1839
0.129808	0.248047	0.350791	0.496094	0.578042	0.744141	0.894346	1.02272	1.24023	1.28449	1.48828	1.75396	2.07156	2.48047	2.91356	3.87462	6.20117	13.2374
0.129844	0.248047	0.350791	0.496094	0.578059	0.744141	0.894346	1.02272	1.24023	1.28525	1.49126	1.75396	2.07267	2.48047	2.91818	3.8802	6.22098	13.3347
0.129992	0.248047	0.350791	0.496094	0.578242	0.744141	0.894346	1.02272	1.24023	1.28732	1.50173	1.75396	2.084	2.48047	2.93448	3.88261	6.32398	13.7593
0.130038	0.248047	0.350791	0.496094	0.579589	0.744141	0.894346	1.02272	1.24023	1.28767	1.50203	1.75396	2.08615	2.48047	2.94335	3.92035	6.32398	13.9701
0.13057	0.248047	0.350791	0.496094	0.580013	0.744141	0.894346	1.02272	1.24023	1.29105	1.50482	1.75396	2.08907	2.48047	2.94737	3.92197	6.32398	14.206
0.130603	0.248047	0.350791	0.496094	0.580227	0.744141	0.894346	1.02272	1.24023	1.29314	1.50881	1.75396	2.1032	2.48047	2.95045	3.93919	6.32398	14.6537
0.130685	0.248047	0.350791	0.496094	0.580783	0.744141	0.894346	1.02272	1.24023	1.29725	1.50881	1.75396	2.10475	2.48047	2.95155	3.94171	6.3531	15.1776
0.130694	0.248047	0.350791	0.496094	0.582763	0.744141	0.894346	1.02272	1.24023	1.29967	1.50881	1.75396	2.10475	2.48047	2.96116	3.95201	6.3531	15.6289
0.130766	0.248047	0.350791	0.496094	0.583014	0.744141	0.894346	1.02272	1.24023	1.30058	1.50881	1.75396	2.10475	2.48047	2.964	3.96875	6.37727	15.6663
0.130954	0.248047	0.350791	0.496094	0.583609	0.744141	0.894346	1.02272	1.24023	1.3015	1.50881	1.75396	2.10475	2.48903	2.96787	3.97649	6.44922	16.6358
0.131166	0.248047	0.350791	0.496094	0.584437	0.744141	0.894346	1.02272	1.24023	1.3071	1.50881	1.75396	2.10475	2.49284	2.976	3.98169	6.44922	19.2152
0.131232	0.248047	0.350791	0.496094	0.585734	0.744141	0.894346	1.02272	1.24023	1.31666	1.50881	1.75396	2.10475	2.49284	2.97656	3.99964	6.45399	22.143
0.131346	0.248047	0.350791	0.496094	0.586728	0.744141	0.894346	1.02272	1.24023	1.31874	1.50881	1.75396	2.10475	2.49284	2.98647	3.99964	6.46827	24.6716
0.13136	0.248047	0.350791	0.496094	0.58722	0.744141	0.894346	1.02272	1.24023	1.32197	1.50881	1.75396	2.10475	2.49399	2.98688	4.00732	6.46827	26.6624
0.132001	0.248047	0.350791	0.496094	0.58829	0.744141	0.894346	1.02613	1.24023	1.32603	1.50881	1.75396	2.10712	2.50384	3.00831	4.00732	6.49201	27.2908
0.13201	0.248047	0.351064	0.496094	0.588558	0.744141	0.894346	1.02989	1.24023	1.33183	1.50881	1.75396	2.10949	2.50724	3.01762	4.01223	6.49201	52.8922
0.132198	0.248047	0.35304	0.496094	0.588853	0.744141	0.894346	1.03057	1.24023	1.33577	1.50881	1.75396	2.11904	2.50737	3.0278	4.03338	6.49201	55.8304
0.132488	0.248047	0.353905	0.496094	0.589929	0.744141	0.894346	1.03384	1.24023	1.33577	1.50881	1.75396	2.11931	2.50852	3.0278	4.0577	6.51094	57.5469
0.132727	0.248047	0.353946	0.496094	0.590407	0.744141	0.894346	1.04183	1.24023	1.33577	1.51362	1.75396	2.11931	2.51332	3.0278	4.06015	6.55332	58.31
0.132732	0.248047	0.354171	0.496094	0.591089	0.744141	0.894346	1.04294	1.24023	1.33577	1.51914	1.75396	2.11931	2.51333	3.0278	4.06749	6.56739
0.132745	0.248047	0.354362	0.496094	0.592458	0.744141	0.894346	1.04541	1.24023	1.33577	1.52162	1.75396	2.13158	2.51562	3.0278	4.06827	6.56739
0.132976	0.248047	0.354415	0.496094	0.593387	0.744141	0.894346	1.04943	1.24023	1.33577	1.5367	1.75396	2.13378	2.51564	3.0278	4.07893	6.67887
0.133116	0.248047	0.354776	0.496094	0.59458	0.744141	0.898316	1.05237	1.24023	1.33577	1.53755	1.75396	2.13378	2.51875	3.08607	4.09089	6.86064
0.133164	0.248047	0.355508	0.496094	0.595191	0.744141	0.902934	1.05237	1.24023	1.33577	1.53804	1.75396	2.13378	2.52959	3.08756	4.09536	6.89195
0.133526	0.248047	0.356337	0.496094	0.595407	0.744141	0.903789	1.05237	1.24023	1.33577	1.53817	1.75396	2.13378	2.52959	3.10802	4.09998	6.89642
0.133601	0.248047	0.357297	0.496094	0.596814	0.744141	0.906322	1.05237	1.24023	1.33577	1.54111	1.75396	2.13378	2.52959	3.10802	4.10382	7.01583
0.133948	0.248047	0.357551	0.496094	0.596923	0.744141	0.910983	1.05237	1.24023	1.33577	1.54131	1.75396	2.13378	2.52959	3.11526	4.10591	7.05082
0.134655	0.248047	0.357967	0.496094	0.59814	0.744141	0.91245	1.05237	1.24023	1.33577	1.55076	1.75396	2.13378	2.52959	3.11961	4.12687	7.19336
0.134909	0.248047	0.358794	0.496094	0.598361	0.744141	0.913389	1.05237	1.24023	1.33577	1.55224	1.75396	2.13378	2.52959	3.12728	4.12832	7.32474
0.134954	0.248047	0.359112	0.496094	0.598627	0.744141	0.914141	1.05237	1.24023	1.33577	1.553	1.75396	2.13378	2.52959	3.13757	4.12832	7.37496
0.135034	0.248047	0.359451	0.496094	0.599211	0.744141	0.915486	1.05237	1.24023	1.33577	1.56727	1.75396	2.13378	2.52959	3.138	4.12832	7.44554
0.135135	0.248047	0.361401	0.496094	0.599306	0.744141	0.916358	1.05237	1.24023	1.33577	1.56759	1.75396	2.13378	2.53875	3.14528	4.12873	7.46205
0.135223	0.248047	0.362943	0.496094	0.599776	0.744141	0.917962	1.05237	1.24023	1.33577	1.56879	1.75396	2.13378	2.54931	3.15182	4.15802	7.49906
0.135383	0.248047	0.363041	0.496094	0.602549	0.744141	0.919976	1.05237	1.24023	1.33577	1.56879	1.75396	2.13378	2.5538	3.15712	4.19176	7.50726
0.135388	0.248047	0.363107	0.496094	0.6028	0.744141	0.921043	1.05237	1.24023	1.33577	1.56879	1.75396	2.13378	2.5538	3.15712	4.2095	7.54405
0.135673	0.248047	0.363294	0.496094	0.60471	0.744141	0.922237	1.05237	1.24023	1.33577	1.56879	1.75396	2.13378	2.5538	3.15712	4.2095	7.57254
0.135755	0.248047	0.363765	0.496094	0.605238	0.744141	0.925206	1.05237	1.24023	1.33577	1.56879	1.75396	2.13378	2.5538	3.16415	4.2168	7.60902
0.135807	0.248047	0.364243	0.496094	0.605547	0.744141	0.925923	1.05237	1.24023	1.33577	1.56879	1.75666	2.13378	2.5538	3.17063	4.2168	7.60902
0.135868	0.248047	0.364296	0.496094	0.605556	0.744141	0.926271	1.05237	1.24023	1.33577	1.56879	1.75724	2.13378	2.5538	3.17655	4.22409	7.7532
0.135889	0.248047	0.364814	0.496094	0.60644	0.744141	0.926999	1.05237	1.24023	1.33577	1.57055	1.76327	2.14879	2.5538	3.17655	4.22409	7.7532
0.13593	0.248047	0.364818	0.496094	0.606456	0.744141	0.927154	1.05237	1.24023	1.33577	1.58595	1.7794	2.14942	2.5538	3.17655	4.23863	7.7532
0.136026	0.248047	0.365011	0.496094	0.606494	0.744141	0.927478	1.05237	1.24023	1.33577	1.58827	1.78484	2.15149	2.5538	3.17655	4.23863	7.84393
0.136047	0.248047	0.365869	0.496094	0.614134	0.744141	0.929443	1.05237	1.24023	1.33577	1.58827	1.78869	2.15241	2.5538	3.17655	4.23863	7.91421
0.136058	0.248047	0.365963	0.496094	0.614627	0.744141	0.930935	1.05237	1.24023	1.33577	1.58827	1.78869	2.1601	2.5538	3.17655	4.24443	7.99927
0.13608	0.248047	0.366131	0.496094	0.614734	0.744141	0.931718	1.05237	1.24023	1.33577	1.58827	1.78869	2.16177	2.5538	3.18483	4.24588	7.99927
0.136566	0.248047	0.366216	0.496094	0.614941	0.744141	0.933346	1.05237	1.24023	1.33577	1.58827	1.78869	2.16278	2.5538	3.18659	4.25836	8.09865
0.137053	0.248047	0.366402	0.496094	0.617418	0.744141	0.935691	1.05237	1.24023	1.33577	1.58827	1.78869	2.16442	2.5538	3.21936	4.26756	8.12519
0.137065	0.248047	0.366793	0.496094	0.617442	0.744141	0.936013	1.05834	1.24023	1.33577	1.58827	1.78869	2.1664	2.5538	3.22257	4.26756	8.12519
0.137146	0.248047	0.366905	0.496094	0.620161	0.744141	0.93653	1.06135	1.24023	1.33577	1.58827	1.78869	2.17422	2.5538	3.2245	4.28195	8.1592
0.137484	0.248047	0.367073	0.496094	0.620544	0.744141	0.938613	1.06284	1.24023	1.33577	1.58827	1.78869	2.17492	2.5538	3.22461	4.3294	8.18523
0.13758	0.248047	0.367173	0.496094	0.623028	0.744141	0.93871	1.06566	1.24023	1.33577	1.58827	1.78869	2.17919	2.55506	3.22461	4.33195	8.23764
0.137727	0.248047	0.367297	0.496094	0.623044	0.744141	0.93921	1.06603	1.24023	1.33577	1.58827	1.79275	2.1844	2.55595	3.22461	4.34491	8.24546
0.138268	0.248047	0.367776	0.496094	0.623795	0.744141	0.939931	1.07014	1.24023	1.33577	1.58827	1.8023	2.1871	2.55691	3.22461	4.36146	8.25665
0.138342	0.248047	0.367837	0.496094	0.624348	0.744141	0.941616	1.07034	1.24023	1.33577	1.58827	1.80325	2.18766	2.5659	3.22461	4.3884	8.26037
0.138662	0.248047	0.368095	0.496094	0.62449	0.744141	0.945145	1.07054	1.24023	1.33577	1.58827	1.80581	2.19856	2.57818	3.22512	4.40836	8.32455
0.13885	0.248047	0.36826	0.496094	0.625248	0.744141	0.94566	1.07171	1.24023	1.33577	1.58827	1.80581	2.2186	2.58515	3.22725	4.41635	8.33821
0.138944	0.248047	0.368462	0.496094	0.625406	0.744141	0.947647	1.07379	1.24023	1.33577	1.58827	1.80581	2.2186	2.58688	3.23414	4.41635	8.48175
0.139262	0.248047	0.368811	0.496094	0.625711	0.744141	0.950777	1.07441	1.24023	1.33577	1.58827	1.80581	2.2186	2.58969	3.26255	4.43346	8.51327
0.139332	0.248047	0.369488	0.496094	0.626417	0.744141	0.953351	1.07614	1.24023	1.33577	1.58827	1.80581	2.2186	2.58969	3.26255	4.4372	8.54233
0.139351	0.248047	0.369799	0.496094	0.627363	0.744141	0.954446	1.07655	1.24023	1.33577	1.58827	1.80581	2.2186	2.58969	3.26826	4.4372	8.55312
0.139373	0.248047	0.370039	0.496094	0.62805	0.744141	0.95556	1.0778	1.24023	1.33577	1.58827	1.80774	2.2186	2.59	3.27346	4.4372	8.59618
0.139504	0.248047	0.37048	0.496094	0.628068	0.744141	0.956932	1.08101	1.24023	1.33577	1.58827	1.81654	2.2186	2.59605	3.27632	4.47173	8.62832
0.139583	0.248047	0.371649	0.496094	0.628727	0.744141	0.958886	1.08346	1.24023	1.33577	1.58827	1.81792	2.2186	2.59655	3.29701	4.47173	8.70994
0.139905	0.248047	0.371724	0.496094	0.629068	0.744141	0.960776	1.08504	1.24023	1.33577	1.58827	1.82215	2.2186	2.60115	3.29727	4.47173	8.7978
0.140092	0.248047	0.371818	0.496094	0.629719	0.744141	0.961741	1.08673	1.24023	1.34414	1.58827	1.8257	2.2186	2.6013	3.29863	4.5025	8.7978
0.140176	0.248047	0.372014	0.496094	0.631642	0.746325	0.962952	1.0894	1.24023	1.34875	1.58827	1.82597	2.22003	2.60813	3.3279	4.55354	8.80828
0.140388	0.248047	0.372061	0.496094	0.631823	0.746803	0.96377	1.09248	1.24023	1.3523	1.58827	1.83664	2.22035	2.61089	3.3369	4.56029	8.94346
0.140694	0.248047	0.37207	0.496094	0.632166	0.747114	0.963789	1.09378	1.24023	1.35238	1.58827	1.83775	2.2274	2.61841	3.33713	4.5726	8.9446
0.140909	0.248047	0.373025	0.496094	0.634072	0.747184	0.966109	1.09472	1.24023	1.35485	1.58827	1.84684	2.23242	2.62559	3.33713	4.57282	9.0154
0.141022	0.248047	0.373095	0.496094	0.634333	0.747192	0.966109	1.09614	1.24023	1.35649	1.58827	1.84725	2.23242	2.63082	3.33713	4.57376	9.02904
0.141255	0.248047	0.373391	0.496094	0.635185	0.747541	0.972716	1.09658	1.24023	1.36071	1.58827	1.84769	2.23242	2.63677	3.33713	4.57376	9.02904
0.141464	0.248047	0.374496	0.496094	0.638623	0.747863	0.973247	1.09725	1.24023	1.3706	1.58827	1.86083	2.23242	2.63677	3.33713	4.58424	9.09693
0.141472	0.248047	0.374943	0.496094	0.638864	0.748187	0.975083	1.09753	1.24023	1.37389	1.58827	1.86391	2.23242	2.63677	3.33713	4.60383	9.12057
0.141539	0.248047	0.375062	0.496094	0.640251	0.750312	0.978267	1.09772	1.24023	1.37772	1.58827	1.86737	2.23242	2.63677	3.33713	4.61394	9.25559
0.141633	0.248047	0.377207	0.496094	0.640692	0.752859	0.98138	1.10451	1.24023	1.37876	1.58827	1.86746	2.23242	2.63677	3.33713	4.61394	9.31085
0.141642	0.248047	0.377492	0.496094	0.640771	0.753995	0.981676	1.10609	1.24023	1.37952	1.58827	1.87744	2.23242	2.63677	3.33713	4.6339	9.33724
0.141796	0.248047	0.377592	0.496094	0.642691	0.754563	0.987256	1.10617	1.24023	1.38442	1.58827	1.88417	2.23552	2.63677	3.33713	4.66038	9.35041
0.141805	0.248047	0.377736	0.496094	0.642736	0.755575	0.98884	1.10713	1.24023	1.38711	1.58827	1.88567	2.23558	2.63677	3.33713	4.68014	9.42904
0.14192	0.248047	0.377862	0.496094	0.642943	0.757142	0.989511	1.10854	1.24023	1.38988	1.58827	1.88907	2.23892	2.63677	3.33851	4.73893	9.58116
0.141999	0.248047	0.378305	0.496094	0.64508	0.75753	0.989571	1.1089	1.24023	1.39013	1.58827	1.88907	2.24016	2.63677	3.34601	4.73893	9.58437
0.142008	0.248047	0.37964	0.496094	0.645466	0.758062	0.990128	1.1093	1.24023	1.39131	1.58827	1.88907	2.24331	2.64864	3.3502	4.73893	9.65154
0.142043	0.248047	0.379987	0.496094	0.646495	0.762359	0.991706	1.1093	1.24023	1.39204	1.58827	1.88941	2.24616	2.65104	3.37173	4.73893	9.6611
0.142112	0.248047	0.380157	0.496094	0.6482	0.76346	0.992188	1.1093	1.24023	1.39331	1.58827	1.89299	2.24616	2.65492	3.3738	4.73893	9.68654
0.14236	0.248047	0.380365	0.496094	0.648364	0.765012	0.992188	1.1093	1.24023	1.39459	1.58827	1.89325	2.24616	2.66389	3.3738	4.76482	9.71239
0.142396	0.248047	0.380463	0.496094	0.64852	0.765825	0.992188	1.1093	1.24023	1.40234	1.58827	1.89351	2.24616	2.67155	3.3738	4.76482	9.77191
0.142435	0.248047	0.380551	0.496094	0.648529	0.77025	0.992188	1.1093	1.24023	1.40317	1.58827	1.89403	2.24616	2.67155	3.3738	4.76482	9.77506
0.142488	0.248047	0.380816	0.496094	0.650617	0.774496	0.992188	1.1093	1.24023	1.40317	1.58827	1.89842	2.24616	2.67155	3.3738	4.77128	9.7845
0.142489	0.248047	0.381001	0.496094	0.650798	0.775568	0.992188	1.1093	1.24023	1.40317	1.58827	1.90442	2.24616	2.67155	3.3738	4.77128	9.87837
0.142511	0.248047	0.381144	0.496094	0.652619	0.776562	0.992188	1.1093	1.24023	1.40317	1.58827	1.90625	2.26816	2.67155	3.37625	4.79058	9.90051
0.142584	0.248047	0.38171	0.496094	0.652951	0.782136	0.992188	1.1093	1.24023	1.40317	1.58827	1.90662	2.28478	2.67155	3.37986	4.79058	9.90325
0.142632	0.248047	0.382233	0.496094	0.653529	0.784393	0.992188	1.1093	1.24023	1.40317	1.58827	1.91276	2.28688	2.67155	3.39487	4.82234	9.90325
0.142678	0.248047	0.382469	0.496094	0.653902	0.784393	0.992188	1.1093	1.24023	1.40317	1.58827	1.91535	2.28688	2.68151	3.3954	4.88596	9.92807
0.142828	0.248047	0.382974	0.496094	0.654041	0.784393	0.992188	1.1093	1.24023	1.40317	1.58827	1.91649	2.28688	2.68201	3.41108	4.88596	9.92807
0.142947	0.248047	0.382977	0.496094	0.657705	0.784393	0.992188	1.1093	1.24023	1.40317	1.58827	1.92373	2.28688	2.68304	3.43072	4.89225	10.0329
0.14295	0.248047	0.383334	0.496094	0.658038	0.784393	0.992188	1.1093	1.24023	1.40317	1.58827	1.92874	2.28688	2.68304	3.43149	4.92359	10.0513
0.142994	0.248047	0.383484	0.496094	0.658304	0.784393	0.992188	1.1093	1.24023	1.40317	1.58827	1.92889	2.28688	2.68304	3.43299	4.92359	10.0727
0.143338	0.248047	0.384625	0.496094	0.659074	0.784393	0.992188	1.1093	1.24023	1.40317	1.58827	1.9297	2.28688	2.68304	3.44598	4.92721	10.1336
0.14377	0.248047	0.384697	0.496094	0.660754	0.784393	0.992188	1.1093	1.24023	1.40317	1.58827	1.93731	2.28688	2.68304	3.44598	4.96094	10.1699
0.143864	0.248047	0.38534	0.496094	0.663637	0.784393	0.992188	1.1093	1.24023	1.40317	1.58827	1.93731	2.28688	2.72066	3.45489	4.96713	10.182
0.144136	0.248047	0.386895	0.496094	0.663712	0.784393	0.992188	1.1093	1.24023	1.40317	1.58827	1.93731	2.28688	2.72275	3.45489	4.96713	10.2272
0.144138	0.248047	0.387245	0.496094	0.665338	0.784393	0.992188	1.1093	1.24023	1.40317	1.58827	1.93731	2.28688	2.73711	3.45806	4.99185	10.2272
0.144148	0.248047	0.38725	0.496094	0.667447	0.784393	0.992188	1.1093	1.24023	1.40317	1.58827	1.93731	2.28688	2.73977	3.45844	5.02257	10.2902
0.144205	0.248047	0.38777	0.496094	0.669188	0.784393	0.992188	1.1093	1.24023	1.40317	1.58827	1.93731	2.28688	2.75227	3.46878	5.0895	10.3171
0.14421	0.248047	0.389391	0.496094	0.669638	0.784393	0.992188	1.1093	1.24023	1.40317	1.58827	1.93731	2.28688	2.75244	3.47266	5.11362	10.3587
0.144368	0.248047	0.3897	0.496094	0.669641	0.784393	0.992188	1.1093	1.24023	1.40317	1.58827	1.93731	2.28688	2.75722	3.47266	5.11362	10.4209
0.144381	0.248047	0.389716	0.496094	0.6706	0.784393	0.992188	1.1093	1.24023	1.40317	1.58827	1.93731	2.28688	2.77325	3.47426	5.11362	10.4298
0.144433	0.248047	0.390273	0.496094	0.671344	0.784393	0.992188	1.1093	1.24023	1.40317	1.58827	1.93731	2.28688	2.77325	3.4815	5.11362	10.468
0.145008	0.248047	0.390476	0.496094	0.671982	0.784393	0.992188	1.1093	1.24023	1.40317	1.58827	1.93731	2.28973	2.77325	3.48413	5.16152	10.468
0.145183	0.248047	0.39094	0.496094	0.672776	0.784393	0.992188	1.1093	1.24023	1.40317	1.58827	1.93731	2.29162	2.77325	3.50791	5.21489	10.5529
0.14527	0.248047	0.391175	0.496094	0.672852	0.784393	0.992188	1.1093	1.24023	1.40317	1.58827	1.93731	2.29231	2.77325	3.50791	5.23255	10.7465
0.145792	0.248047	0.391267	0.496094	0.673454	0.784393	0.992188	1.1093	1.24023	1.40317	1.58827	1.93731	2.31095	2.77325	3.50791	5.23255	10.8064
0.14614	0.248047	0.391657	0.496094	0.674742	0.784393	0.992188	1.1093	1.24023	1.40317	1.58827	1.93731	2.31401	2.77325	3.50791	5.244	10.8402
0.14616	0.248047	0.392005	0.496094	0.676656	0.784393	0.992188	1.1093	1.24023	1.40317	1.58959	1.93731	2.3184	2.77325	3.51211	5.25602	10.8803
0.146308	0.248047	0.392311	0.496094	0.677562	0.784393	0.992188	1.1093	1.24023	1.40317	1.59023	1.93731	2.32728	2.77325	3.52349	5.25602	10.9169
0.146512	0.248047	0.392466	0.496094	0.677686	0.784393	0.992188	1.1093	1.24023	1.40317	1.59249	1.93731	2.33585	2.77325	3.52485	5.25602	10.9506
0.146556	0.248047	0.393257	0.496094	0.678	0.784393	0.992188	1.1093	1.24023	1.411	1.60384	1.93731	2.33949	2.77325	3.52541	5.26187	10.9506
0.146926	0.248047	0.393386	0.496094	0.678382	0.784393	0.992188	1.1093	1.24023	1.41472	1.60762	1.93731	2.34007	2.77325	3.52541	5.26187	10.9506
0.147102	0.248047	0.39427	0.496094	0.678964	0.784393	0.992188	1.1093	1.24023	1.41625	1.60953	1.93731	2.34007	2.77325	3.55023	5.27355	11.0753
0.147211	0.248047	0.395038	0.496094	0.680856	0.784393	0.992188	1.1093	1.24023	1.4192	1.61364	1.93731	2.34007	2.77325	3.55149	5.27355	11.1458
0.147266	0.248047	0.395738	0.496094	0.680999	0.784393	0.992188	1.1093	1.24023	1.44635	1.62123	1.93731	2.34007	2.77325	3.55149	5.30843	11.1924
0.147328	0.248047	0.396515	0.496094	0.685371	0.784393	0.992188	1.1093	1.24023	1.44635	1.62216	1.93731	2.34007	2.77325	3.55149	5.32579	11.1924
0.147388	0.248047	0.396569	0.496094	0.687284	0.784393	0.992188	1.1093	1.24023	1.44635	1.62378	1.93731	2.34007	2.77325	3.55149	5.3546	11.2171
0.147706	0.248047	0.39662	0.496094	0.687956	0.784393	0.992188	1.1093	1.24023	1.44635	1.64241	1.93731	2.34007	2.77325	3.57126	5.36607	11.2666
0.147929	0.248047	0.396826	0.496094	0.689923	0.784393	0.992188	1.1093	1.24023	1.44635	1.64439	1.93731	2.34007	2.78101	3.58624	5.36607	11.3127
0.147999	0.248047	0.398242	0.496094	0.690074	0.784393	0.992188	1.11905	1.24023	1.44635	1.64605	1.93731	2.34007	2.78222	3.58978	5.44009	11.3236
0.14802	0.248047	0.3994	0.496094	0.692202	0.784393	0.992188	1.12415	1.24216	1.44635	1.64918	1.93731	2.34007	2.78226	3.61162	5.44574	11.4129
[truncated: 2,613 more rows]
